# Supplementary material for: Single-cell transcriptome analysis defines heterogeneity of the murine pancreatic ductal tree
Source: eLife. 2021 May 19;10:e67776. doi: 10.7554/eLife.67776 (PMC8184217; doi:10.7554/eLife.67776)
Supplement: Figure 1—source data 1. [file elife-67776-fig1-data1.xlsx]

## Sheet: All DBA+ cells (16 clusters)
Cluster	# of cells	Transcripts	Genes
0	1576	5637	2299
1	1173	4065	1350
2	1127	5008	1810
3	836	4355	1734
4	566	4194	1371
5	494	3626	1732
6	219	8539	2345
7	197	12864	3078
8	180	5323	2354
9	147	6123	2285
10	72	8312	2222
11	68	12645	3220
12	56	7955	2618
13	43	9160	2190
14	35	17125	3523
15	24	6332	2155
