# Supplementary material for: Single-cell transcriptome analysis defines heterogeneity of the murine pancreatic ductal tree
Source: eLife. 2021 May 19;10:e67776. doi: 10.7554/eLife.67776 (PMC8184217; doi:10.7554/eLife.67776)
Supplement: Figure 1—source data 2. [file elife-67776-fig1-data2.xlsx]

## Sheet: Cluster vs all-all DBA+ cells
Spp1	3.40667	0	0
Clu	2.90894	0	0
Krt18	2.44446	0	0
Krt8	2.30457	0	0
Ces1d	2.24763	0	0
Dbi	2.19578	0	0
Epcam	2.19427	0	0
Atp1b1	2.14979	0	0
Tm4sf4	2.09355	0	0
Mgst1	1.94495	0	0
Fxyd3	1.94407	0	0
Cldn3	1.94168	0	0
Anxa5	1.92534	0	0
Dcdc2a	1.90236	0	0
Tstd1	1.89979	0	0
Lurap1l	1.89861	0	0
Apoc1	1.82931	0	0
Alcam	1.7661	0	0
Cp	1.7612	0	0
Snhg18	1.74148	0	0
Sox9	1.69154	0	0
Cldn7	1.66837	0	0
Bicc1	1.66676	0	0
Cldn10	1.6574	0	0
Sorbs2	1.62635	0	0
Scara3	1.61284	0	0
Cdh1	1.60262	0	0
Pdzk1ip1	1.60188	0	0
Ambp	1.57678	0	0
Hes1	1.54881	0	0
Spint2	1.54295	0	0
Pigr	1.52114	0	0
Ttr	1.51443	0	0
Krt19	1.50163	0	0
Fmo2	1.48382	0	0
Smim22	1.46646	0	0
Wfdc15b	1.45663	0	0
Dsg2	1.44862	0	0
Ccnd1	1.4237	0	0
Bsg	1.41636	0	0
Cryab	1.41523	0	0
1700011H14Rik	1.39015	0	0
Sox4	1.37976	0	0
Cystm1	1.37898	0	0
S100a11	1.36787	0	0
Nudt19	1.36558	0	0
Cxadr	1.36324	0	0
Cd9	1.35658	0	0
Pkhd1	1.34034	0	0
Ehf	1.32366	0	0
Pebp1	1.31849	0	0
Gstt1	1.31673	0	0
Prox1	1.28987	0	0
Slc28a3	1.24816	0	0
Hhex	1.24057	0	0
Kifc3	1.23505	0	0
Clmn	1.23041	0	0
St3gal4	1.20745	0	0
Rbms3	1.17274	0	0
Rab27b	1.17191	0	0
Prom1	1.16814	0	0
Zbtb20	1.16265	0	0
Nfib	1.15724	0	0
Adamts1	1.14441	0	0
Wwc1	1.14141	0	0
Prr15l	1.13408	0	0
Ptp4a1	1.1272	0	0
Cadm1	1.12653	0	0
Ppp1r1b	1.12067	0	0
Gsta3	1.10556	0	0
Degs1	1.10424	0	0
Fgfr3	1.09397	0	0
Anxa4	1.09153	0	0
Ankrd1	1.08634	0	0
Mpc2	1.07951	0	0
Tnfrsf12a	1.07015	0	0
Ptprf	1.06707	0	0
Krt23	1.06079	0	0
Scd2	1.04173	0	0
Wfdc2	1.04111	0	0
Kcne3	1.03862	0	0
Cd24a	1.03608	0	0
Sdc4	1.02525	0	0
Sec62	1.02154	0	0
Atp1a1	1.02087	0	0
Ddah2	1.0187	0	0
Dsp	1.01325	0	0
Gstm5	1.01049	0	0
Gata6	1.00011	0	0
Sult1a1	0.994402	0	0
Slc5a1	0.98817	0	0
Cbs	0.976062	0	0
Meis2	0.973868	0	0
Adk	0.972084	0	0
Wfdc3	0.967183	0	0
Tgfb2	0.964471	0	0
Aldoc	0.95793	0	0
Osgin1	0.95714	0	0
C2cd4b	0.946431	0	0
Tesc	0.939091	0	0
Ncald	0.932246	0	0
Gabarapl1	0.927078	0	0
Phldb2	0.922915	0	0
Pcbd1	0.921224	0	0
Pbx1	0.918102	0	0
Nucb2	0.905952	0	0
Chka	0.905915	0	0
Muc1	0.903421	0	0
Crp	0.902857	0	0
Kcnk1	0.898062	0	0
Aplp2	0.895565	0	0
Fxyd1	0.89537	0	0
Plet1	0.88899	0	0
Emp2	0.887798	0	0
Cald1	0.887476	0	0
Tshz2	0.885329	0	0
Sema5a	0.884833	0	0
Smco4	0.878588	0	0
Arhgap24	0.874905	0	0
Krt7	0.872884	0	0
Echdc2	0.87215	0	0
Rab25	0.86621	0	0
Pvrl2	0.865197	0	0
Stt3b	0.860197	0	0
Gpx4	0.859048	0	0
Gas6	0.855133	0	0
Id2	0.851461	0	0
Palmd	0.840515	0	0
Qsox1	0.837899	0	0
S100a1	0.83619	0	0
Ptgr1	0.831464	0	0
Tmem205	0.828328	0	0
Nav2	0.826608	0	0
Pdgfa	0.824375	0	0
Bag1	0.824058	0	0
Tmem147	0.823188	0	0
Cgn	0.82175	0	0
Hrsp12	0.820749	0	0
Nfix	0.818066	0	0
Pigyl	0.810434	0	0
Nedd4	0.807885	0	0
Sbspon	0.806836	0	0
Idh2	0.804014	0	0
Bche	0.803231	0	0
Csrp2	0.800488	0	0
Gjb1	0.799924	0	0
Hpn	0.796836	0	0
Lcn2	0.795914	0	0
Enah	0.795029	0	0
Arhgap5	0.790848	0	0
Rhou	0.79022	0	0
Hmgn1	0.788768	0	0
Gsta4	0.787114	0	0
Atpif1	0.786476	0	0
Onecut1	0.786184	0	0
Fgfr2	0.785448	0	0
Mme	0.775713	0	0
Cbx6	0.775587	0	0
Pamr1	0.772238	0	0
Slc44a3	0.771946	0	0
Hnf1b	0.76744	0	0
Osbpl3	0.766712	0	0
Fermt1	0.762748	0	0
Stard10	0.76147	0	0
5330417C22Rik	0.758136	0	0
Angpt1	0.755645	0	0
Dync2li1	0.754736	0	0
Shank2	0.74866	0	0
1700049E15Rik	0.747243	0	0
Sh2d4a	0.74679	0	0
F3	0.744401	0	0
Ndufa6	0.743574	0	0
S100a16	0.73974	0	0
Ank3	0.737928	0	0
Bex4	0.737096	0	0
Tst	0.734347	0	0
Ecscr	0.734013	0	0
Ddit4l	0.724428	0	0
Gpx2	0.72294	0	0
Tmem229a	0.722932	0	0
Nr5a2	0.722136	0	0
Cldn8	0.720072	0	0
Chchd10	0.70977	0	0
Lsr	0.702528	0	0
Ptgds	0.701435	0	0
Casp12	0.695647	0	0
Qpct	0.690545	0	0
Laptm4b	0.685722	0	0
Lama4	0.675679	0	0
Magi3	0.671844	0	0
Myh14	0.670787	0	0
Tspan7	0.667465	0	0
Mia	0.66669	0	0
Eps8l2	0.66661	0	0
Cobl	0.665564	0	0
Magi1	0.663754	0	0
Cgnl1	0.660612	0	0
Spint1	0.656808	0	0
Crip2	0.654487	0	0
Crb3	0.651751	0	0
Npdc1	0.650006	0	0
Lrrn1	0.64229	0	0
Foxa2	0.639826	0	0
Wnt4	0.639671	0	0
Slc35f5	0.638812	0	0
Enc1	0.628051	0	0
Lrrc16a	0.627042	0	0
Tmc4	0.618791	0	0
Mmd2	0.616996	0	0
Vsig10	0.616072	0	0
Il17re	0.61311	0	0
St14	0.606773	0	0
Chchd2	0.601705	0	0
Car2	0.598908	0	0
Plxnb1	0.598623	0	0
Cldn6	0.596828	0	0
Vegfa	0.589426	0	0
Cyb561	0.587861	0	0
Tnfrsf19	0.587026	0	0
Cox4i1	0.585368	0	0
9130008F23Rik	0.585252	0	0
Glis3	0.580995	0	0
Epb41l5	0.57852	0	0
H3f3b	0.57792	0	0
Sphk1	0.575842	0	0
Capsl	0.566843	0	0
Myrf	0.564013	0	0
Gm609	0.563289	0	0
Slc38a4	0.560947	0	0
Dixdc1	0.560335	0	0
Habp2	0.558116	0	0
Mtcl1	0.556288	0	0
Rsph9	0.548569	0	0
Chmp4c	0.547824	0	0
Prss8	0.547584	0	0
Itgb8	0.543463	0	0
Cdo1	0.535581	0	0
Cited4	0.526869	0	0
mt-Co1	0.454399	0	0
BC021891	0.515344	4.17e-303	0
Nrtn	0.495381	5.32e-302	0
Etl4	0.632242	8.39e-301	0
Ifi27	0.963104	7.09e-300	0
Sgms2	0.541819	1.14e-299	0
Klc3	0.523877	4.56e-299	0
Sema6a	0.594534	2.76e-298	0
Myo1b	0.596372	3.91e-298	0
Fads3	0.589703	1.36e-297	0
Ndufa4	0.647343	6.37e-297	0
Cnpy2	0.785117	9.07e-295	0
Lmo4	0.798747	2.24e-294	0
Cblc	0.494628	1.06e-293	0
Col18a1	0.571801	3.72e-292	0
Dstn	0.787104	1.32e-291	0
0610011F06Rik	0.735959	2.61e-291	0
Prelp	0.605149	1.29e-289	0
Camk2n1	0.656777	2.47e-289	0
Fam213a	0.598708	1.14e-287	0
mt-Cytb	0.46891	1.54e-287	0
Slc39a4	0.571436	2.66e-286	0
Wbp5	0.796174	6.67e-286	0
Tmem176b	0.754701	3.12e-284	0
Hebp2	0.499192	1.29e-283	0
Timp3	0.632693	1.33e-282	0
Map2	0.502465	4.05e-282	0
Adamts9	0.617842	5.72e-282	0
Bmyc	0.890184	2.42e-281	0
Amotl2	0.591134	1.15e-279	0
Abcd3	0.682287	1.28e-279	0
St3gal5	0.630413	2.33e-279	0
Tmem184a	0.468462	4.52e-279	0
Smim6	0.5744	5.56e-279	0
Plpp2	0.5754	1.25e-278	0
F11r	0.701695	1.3e-278	0
Hacd1	0.530444	2.35e-277	0
Tead1	0.528401	1.6e-276	0
Proser2	0.561042	3.32e-275	0
Prdx2	0.750101	3.45e-275	0
Rnf128	0.532116	7.58e-275	0
Myl12a	0.749912	2.3e-274	0
Rhov	0.570064	1.31e-273	0
Nipal2	0.455151	1.19e-272	0
Plekhb1	0.506296	1.6e-272	0
Lipt2	0.577605	3.52e-272	0
Nhsl1	0.502701	3.65e-272	0
Dynll2	0.759919	8.97e-271	0
Cdc42ep1	0.540365	4.02e-270	0
Sox6	0.463985	1.11e-268	0
Uqcrb	0.629041	2.15e-267	0
Chdh	0.474305	1.1e-266	0
Urah	0.455089	1.43e-266	0
Gstm1	0.691822	3.92e-266	0
Cat	0.80959	7.47e-266	0
Hs6st2	0.536414	2.15e-265	0
Adam33	0.760083	5.51e-264	0
Ndufa5	0.741583	5.39e-263	0
Kcnq1	0.529717	3.46e-262	0
Degs2	0.450794	5e-262	0
Cisd1	0.737693	2.86e-261	0
Atp5j	0.604121	4.34e-261	0
Mal2	0.473155	1.17e-260	0
Sestd1	0.564159	7.73e-260	0
Ano1	0.456476	2.69e-259	0
Ptms	0.695393	3.57e-259	0
Pbld2	0.476918	2.2e-258	0
Me1	0.44661	7.73e-258	0
Hilpda	0.647682	1.1e-257	0
Ube2e3	0.717007	2.96e-257	0
Ngf	0.475963	7.95e-257	0
Naaladl2	0.500252	8.14e-257	0
Sema3c	0.568267	7.79e-256	0
Syngr1	0.497595	1.38e-255	0
Trp53bp2	0.595229	8.73e-254	0
Tgm2	0.576538	4.9e-253	0
Serinc2	0.415463	7.88e-253	0
Gmnn	0.912443	1.36e-250	0
Slc15a2	0.576708	2.3e-250	0
Grb14	0.439906	3.81e-249	0
Cnn3	0.638093	4.27e-249	0
Kif12	0.449695	8.42e-249	0
Fdx1	0.627217	6.13e-246	0
Cd2ap	0.770641	1.08e-245	0
Apcs	0.449396	3.54e-245	0
Stxbp6	0.615524	3.65e-245	0
Thra	0.632544	4.89e-245	0
Rhoj	0.608081	7.99e-243	0
Gm42418	0.926723	1.31e-242	0
Atp9a	0.471689	5.35e-242	0
Hnf1aos1	0.436332	7.07e-241	0
2310030G06Rik	0.407082	1.04e-240	0
Ddt	0.723671	3.36e-240	0
Perp	0.427251	1.23e-239	0
Plce1	0.46559	1.83e-239	0
Sort1	0.476866	1.14e-238	0
Selm	0.638703	1.87e-238	0
Nfia	0.643107	3.81e-238	0
Shroom3	0.458635	6.03e-238	0
App	0.6454	6.47e-238	0
Pdgfc	0.548439	1.02e-237	0
Nckap1	0.525484	2.36e-237	0
Fkbp4	0.716127	2.71e-237	0
Slc4a4	0.461067	3.03e-237	0
Smoc1	0.460694	4.09e-237	0
Efhd1	0.440724	1.26e-236	0
Cox7c	0.495079	4.17e-236	0
Pdgfd	0.495955	4.79e-236	0
Syne2	0.614637	6.82e-236	0
Meis1	0.513607	1.27e-235	0
Spon1	0.481079	4.07e-235	0
Elovl7	0.468641	7.25e-235	0
Gja1	0.536263	8.65e-235	0
Kalrn	0.414926	9.86e-235	0
Ddr1	0.473571	8.71e-234	0
Cyp39a1	0.453224	1.62e-233	0
Tns1	0.754128	1.77e-232	0
Map4k3	0.535176	2.61e-232	0
Map1lc3a	0.662432	1.34e-231	0
Ctnnb1	0.688473	9.28e-231	0
Mllt4	0.53536	1.05e-228	0
Car8	0.459841	1.19e-228	0
Ift43	0.512234	1.27e-228	0
Rorc	0.406128	2.04e-228	0
Cyp2j6	0.455319	1.17e-227	0
Slc27a1	0.477585	1.64e-227	0
Hdac11	0.446212	5.57e-227	0
Chp1	0.665968	7.38e-227	0
Anapc13	0.671529	4.64e-226	0
Selenbp1	0.616347	3.53e-225	0
Ocln	0.415794	1.53e-224	0
Chrnb1	0.425803	1.89e-224	0
Sox5	0.469753	3.03e-224	0
Grb7	0.426014	3.24e-224	0
Actn4	0.64322	4.93e-224	0
Yes1	0.523728	1.04e-223	0
Suclg1	0.67416	2.46e-223	0
Mapk8ip1	0.405788	3.4e-223	0
4931406C07Rik	0.601466	7.52e-223	0
Cd63	0.564652	5.3e-222	0
Wfdc18	1.03193	2.27e-221	0
Fads6	0.458567	6.09e-221	0
Myh10	0.560424	1.27e-220	0
Eci2	0.62753	1.98e-220	0
Spink4	0.702383	2.42e-220	0
Agrn	0.508113	3e-220	0
Ramp1	0.641534	1.27e-219	0
Pkia	0.401577	2.53e-219	0
Parva	0.462297	4.77e-219	0
Slco3a1	0.591477	4.3e-218	0
Hint2	0.642398	1.86e-217	0
Pld1	0.513268	7.36e-217	0
Tmem176a	0.659647	1.59e-216	0
Morn2	0.504692	4.38e-216	0
Sdc2	0.439693	6.58e-215	0
Enpp5	0.423733	9.51e-215	0
Ildr1	0.446791	4.12e-214	0
2900026A02Rik	0.49515	7.16e-214	0
Serf1	0.528883	2.08e-213	0
Tmem59	0.62362	2.44e-213	0
Casz1	0.486507	6.66e-213	0
Cttn	0.467405	1.01e-212	0
H1f0	0.747974	2.51e-212	0
Ndufb2	0.673669	4.43e-212	0
Bik	0.438566	5.19e-212	0
Rbm47	0.613732	6.85e-211	0
Krtcap3	0.479115	2.19e-210	0
Maged1	0.557441	4.32e-210	0
Zc2hc1a	0.486772	6.33e-210	0
1110001J03Rik	0.64287	6.61e-210	0
Polr2f	0.653962	1.09e-209	0
Rassf9	0.45065	2e-209	0
Rps27l	0.530961	3.3e-209	0
Arl3	0.589663	4.07e-209	0
Mcee	0.584269	6.68e-209	0
Romo1	0.616659	1.06e-208	0
Fat1	0.392137	1.56e-208	0
Igf1r	0.575565	1.14e-206	0
Lima1	0.596003	2.55e-206	0
Pard3	0.39595	2.59e-206	0
mt-Nd4	0.390475	4.8e-204	0
0610040J01Rik	0.456567	8.35e-204	0
Kit	0.423864	1.16e-203	0
Fmo1	0.46847	2.99e-203	0
Vasn	0.414708	5.29e-203	0
Bicd1	0.411373	4.4e-201	0
Dnajc1	0.637206	1.21e-200	0
Tmem238	0.54302	6.02e-200	0
Tmbim6	0.546653	2.08e-199	0
Pgrmc1	0.596001	8.02e-199	0
Mfge8	0.686402	1.46e-198	0
Tpi1	0.616323	1.6e-198	0
Glo1	0.620409	8.68e-198	0
Ndufb9	0.594907	8.96e-197	0
Bmpr1a	0.433781	2.89e-196	0
Ywhaq	0.614457	3.47e-195	0
Dclre1a	0.522247	5.87e-194	0
Tcf7l2	0.520056	1.44e-193	0
Deptor	0.525779	6.43e-192	0
Fam20c	0.429414	1.37e-191	0
Msi2	0.600478	1.62e-191	0
Spns2	0.412602	4.89e-191	0
Gprc5b	0.39222	2.47e-189	0
Ptov1	0.558808	3.06e-189	0
Eno1	0.653205	3.85e-189	0
Creb3l1	0.409001	9.37e-189	0
Ptprk	0.40404	7.43e-188	0
Lzts2	0.427701	2.17e-187	0
Gpt2	0.406676	4.84e-187	0
Ypel2	0.449185	2.23e-186	0
Kansl1l	0.506624	2.78e-186	0
Llgl2	0.389287	3.89e-186	0
Abhd14b	0.452755	4.37e-186	0
Swi5	0.551044	5.24e-186	0
Cox5b	0.527664	1.88e-185	0
Zfp467	0.540979	2.42e-184	0
Tjp2	0.460829	6.44e-184	0
Myl6	0.386477	7.72e-184	0
Ppp2r3a	0.433636	6.4e-183	0
Nrep	0.374245	7.16e-182	0
Mgst3	0.49425	1.23e-179	0
Tjp1	0.432713	2.42e-179	0
Errfi1	0.529037	7.55e-179	0
Cdc42ep5	0.38477	1.91e-178	0
Nenf	0.578128	2.98e-178	0
Park7	0.556649	7.39e-178	0
Dab2ip	0.404746	1.64e-177	0
Akr1e1	0.487369	2.1e-177	0
Aes	0.573372	2.26e-176	0
Phpt1	0.53633	2.79e-176	0
BC029214	0.529167	5.91e-175	0
Cox6b1	0.43911	4.51e-174	0
Ndufa13	0.487912	9.1e-174	0
Nr2f6	0.461516	1.05e-173	0
Nudc	0.565242	3.92e-173	0
Phyh	0.513505	7.22e-173	0
Psmb6	0.551502	1.51e-172	0
St5	0.40066	1.08e-170	0
Rhob	0.645884	1.42e-170	0
Ech1	0.588416	3e-170	0
Atxn10	0.566995	5.64e-170	0
Ndufs6	0.582588	3.27e-169	0
Tm9sf3	0.58013	6.19e-169	0
Ctnna1	0.558178	6.8e-169	0
Hsp90aa1	0.574841	1.06e-168	0
Uqcr10	0.521065	1.09e-168	0
Dag1	0.497722	1.36e-168	0
Eif4a2	0.573604	4.4e-168	0
Anxa2	0.53885	5.53e-168	0
Uqcr11	0.520524	6.82e-168	0
Rora	0.456386	1.56e-167	0
Rassf7	0.383189	1.99e-167	0
Sptssa	0.598642	4.35e-167	0
mt-Co3	0.298692	1.91e-166	0
Lpp	0.533013	9.55e-166	0
Aldh7a1	0.46754	1.03e-165	0
Tm2d3	0.540113	8e-165	0
Bcam	0.39903	1.14e-164	0
Adgrg6	0.423429	4.98e-164	0
Trip6	0.406031	1.14e-163	0
Hcfc1r1	0.583927	1.5e-161	0
Rabac1	0.500273	3.02e-161	0
Agpat2	0.462991	5.07e-161	0
Tceal8	0.48643	1.42e-160	0
Ndufc1	0.546906	1.59e-160	0
Auts2	0.380668	6.97e-160	0
Cyp2d22	0.384602	2.23e-159	0
F2rl1	0.379482	6.82e-159	0
Eepd1	0.425299	9.29e-159	0
Dcbld1	0.344362	1.3e-158	0
Csrp1	0.55948	3.84e-158	0
Cox7a2	0.455844	5.63e-158	0
B9d1	0.366327	1.49e-157	0
Ccdc181	0.400978	3.47e-157	0
Fam84b	0.394961	5.99e-157	0
Cox6c	0.411544	6.48e-157	0
Gstp1	0.534077	8e-155	0
Ppp1r9a	0.429995	1.15e-154	0
Eci1	0.519899	1.49e-154	0
Crot	0.495404	7.89e-154	0
Rab20	0.402354	1.46e-153	0
Ccdc34	0.520032	2.3e-153	0
Gclm	0.506243	2.34e-153	0
Cbx5	0.528706	3.16e-153	0
Hist1h2bc	0.536407	4.68e-153	0
Hsd17b10	0.558033	1.76e-152	0
Cpq	0.454972	5.78e-152	0
Frmd6	0.424476	2.15e-151	0
Tinagl1	0.266154	3.68e-151	0
Impad1	0.46186	3.93e-151	0
Cyr61	0.47444	9.56e-151	0
Atp5h	0.414407	1.12e-150	0
Ndufab1	0.516765	1.5e-150	0
Pkd2	0.461048	3.33e-150	0
Ift57	0.394109	4.02e-149	0
Bphl	0.407989	6.17e-149	0
Ptpn14	0.371109	9.67e-149	0
Prdx6	0.534052	4.96e-148	0
Usmg5	0.51586	5.75e-148	0
Tacc2	0.449579	6.69e-148	0
Pfdn1	0.555582	1.13e-147	0
Abcc3	0.42127	5.18e-147	0
Acadm	0.506685	1.2e-146	0
Rab34	0.365632	4.26e-146	0
Nedd4l	0.38498	1.61e-145	0
Lasp1	0.548619	6.38e-143	0
Tonsl	0.53448	1.15e-142	0
0610009B22Rik	0.435633	1.45e-142	0
H2afv	0.491945	1.69e-142	0
Ahdc1	0.384117	5.06e-142	0
Ndufs5	0.49581	4.43e-141	0
Zc3h7b	0.387664	5.58e-141	0
Ppa2	0.485142	6.2e-141	0
Cldnd1	0.480819	7.54e-141	0
Metap2	0.50429	5.98e-140	0
Amotl1	0.358908	8.03e-139	0
Twsg1	0.390128	1.64e-137	0
Cpne8	0.399491	4.85e-137	0
Ctnnd1	0.478124	5.31e-137	0
Ndufa7	0.466512	4.75e-136	0
Tceb2	0.412192	1.16e-135	0
Echs1	0.481871	1.09e-133	0
Mcc	0.331867	1.19e-133	0
Mmp14	0.353058	5.86e-133	0
Pigp	0.500402	1.36e-132	0
Jup	0.392758	2.61e-132	0
Timm8b	0.496482	9.17e-132	0
Trim44	0.457506	2.18e-131	0
B4galt6	0.476305	6.61e-131	0
Chchd6	0.364366	2.64e-130	0
Atp5b	0.435253	2.94e-130	0
Esd	0.513141	3.65e-130	0
Mdh1	0.502718	7.57e-130	0
Fam92a	0.379902	8.7e-130	0
Plcb4	0.34234	1.89e-129	0
Hint1	0.397164	4.47e-128	0
Rbbp9	0.328375	4.82e-128	0
Mrpl52	0.458511	1.13e-127	0
Acot13	0.48008	2.45e-127	0
Smim5	0.317001	4.4e-127	0
Spata24	0.396399	1.21e-126	0
Ndufa2	0.393312	1.88e-126	0
Tecr	0.488559	1.99e-126	0
Polr2m	0.501724	2.32e-126	0
Hadh	0.441088	1.55e-125	0
Daam1	0.398073	1.9e-125	0
Tob1	0.34872	2.12e-125	0
Sucla2	0.457294	4.53e-125	0
Arid5b	0.413067	9.56e-125	0
Paics	0.508188	1.94e-124	0
Ndufb8	0.468628	3.65e-124	0
Pkp4	0.389667	3.98e-124	0
Edf1	0.449197	5.26e-124	0
1110004E09Rik	0.382754	5.58e-124	0
Fermt2	0.29453	1.08e-123	0
Dusp16	0.372829	2.09e-123	0
Fis1	0.487055	2.81e-123	0
Rab11fip2	0.438723	3.13e-123	0
Aig1	0.408108	9.73e-123	0
Pvr	0.336447	6.39e-122	0
Deb1	0.430725	1.39e-121	0
Cfap36	0.402313	1.82e-121	0
Cfdp1	0.492416	4.02e-121	0
Tmem106b	0.440644	2.11e-119	0
Tnks1bp1	0.324371	2.12e-119	0
Srebf1	0.388574	3.79e-119	0
Atp5d	0.439861	4.38e-119	0
Cav2	0.353572	4.46e-119	0
Jade1	0.409191	1.01e-118	0
Lamb2	0.335227	5.41e-118	0
Map3k1	0.474074	9.8e-118	0
Ggct	0.406846	1.11e-117	0
Clcn3	0.475717	1.51e-117	0
Coa3	0.476548	1.81e-117	0
Atp5k	0.40641	1.16e-116	0
Plk2	0.372452	1.22e-116	0
Rbp1	0.287127	2.17e-116	0
Pkn2	0.495507	3.71e-116	0
Fgfr1	0.379918	4.51e-116	0
Apoa1bp	0.426429	1.02e-115	0
Wasl	0.394681	1.28e-115	0
Ndufa3	0.405205	3.06e-115	0
Tsen34	0.45337	3.91e-115	0
Pnrc1	0.478704	1.66e-114	0
Maged2	0.329035	3.08e-114	0
Cdc42bpa	0.338352	3.63e-114	0
Cuedc1	0.320482	3.75e-114	0
Skp1a	0.478782	6.78e-114	0
Pnkd	0.454882	1.88e-113	0
Atp11a	0.349193	2.83e-113	0
Cxxc5	0.392916	3.06e-113	0
Pfdn5	0.338748	3.31e-113	0
Tax1bp3	0.412186	1.09e-112	0
Ubb	0.281085	1.17e-112	0
Ndufb4	0.473048	3e-112	0
Tmem51	0.323744	3.52e-112	0
Abhd11	0.373576	2.04e-111	0
Chmp5	0.444628	1.58e-110	0
Cirbp	0.484204	2.91e-110	0
Atp5g3	0.445517	4.56e-110	0
Oaz2	0.305263	1.24e-109	0
Suclg2	0.404124	2.54e-109	0
Aktip	0.368244	2.97e-109	0
Vamp8	0.389905	9.86e-109	0
Fdft1	0.339538	3.01e-108	0
1190002N15Rik	0.333312	6.83e-108	0
Dock7	0.395343	1.65e-107	0
B230118H07Rik	0.329684	1.66e-107	0
Myl12b	0.482813	2.58e-107	0
Gabarapl2	0.436876	3.62e-107	0
Akap9	0.430345	5.53e-107	0
Ywhae	0.402594	6.91e-107	0
Fam134b	0.443521	8.21e-107	0
Shtn1	0.398504	9.57e-107	0
Zfp704	0.372476	9.69e-107	0
Arhgef12	0.383611	1.28e-106	0
Zfp664	0.377561	3.64e-106	0
Ndufa11	0.447912	4.69e-106	0
Lrrfip1	0.446177	6.12e-106	0
Ssr2	0.375389	1.14e-105	0
Atp5g1	0.41653	1.24e-105	0
Mt2	0.552078	1.87e-105	0
Dnajb2	0.345938	2e-105	0
Fasn	0.342315	1.13e-104	0
2410015M20Rik	0.450849	2.26e-104	0
Commd1	0.455728	6.61e-104	0
Amd1	0.435829	9.77e-104	0
Kcnn4	0.396561	1.12e-103	0
Timm13	0.435572	1.51e-103	0
Galk1	0.377977	2.84e-103	0
Arap2	0.350748	4.83e-103	0
Ephx1	0.359486	7.67e-103	0
2010111I01Rik	0.381735	8.66e-103	0
Chmp2a	0.423411	9.58e-103	0
Gtf2i	0.421504	3.01e-102	0
Pik3c2a	0.413074	4.25e-102	0
Lamtor2	0.423367	4.63e-102	0
Rbpms	0.322452	9.17e-102	0
Tmem107	0.294713	9.98e-102	0
Cep290	0.348944	1.38e-101	0
Snrpd2	0.420785	2.21e-101	0
Golim4	0.355611	2.46e-101	0
Ergic3	0.450483	5.69e-101	0
Cyb5r3	0.401443	2.2e-100	0
Fads1	0.377918	2.46e-100	0
Etfb	0.445276	7.53e-100	0
Myo6	0.268045	7.8e-100	0
Mthfd2l	0.325596	1.28e-99	0
Dynlt3	0.421472	1.03e-98	0
Fam103a1	0.44153	2.61e-98	0
Cfap20	0.37903	3.16e-98	0
Clstn1	0.32505	3.39e-98	0
Cd81	0.291517	5.16e-98	0
Atxn7l3b	0.430733	3.09e-97	0
Cdk19	0.375014	3.32e-97	0
Golgb1	0.415273	7.87e-97	0
Cyhr1	0.370983	7.93e-97	0
Oat	0.500164	1.08e-96	0
Rnh1	0.436805	1.09e-96	0
Ngfrap1	0.419235	3.38e-96	0
Fam20b	0.33957	3.43e-95	0
Ift20	0.381117	9.83e-95	0
Xist	0.319243	1.09e-94	0
Dalrd3	0.324118	2.55e-94	0
Zfyve21	0.320074	3.8e-94	0
Armcx3	0.35986	5.7e-94	0
Arl6ip1	0.367883	1.18e-93	0
Hmgb1	0.273053	2.51e-93	0
Ppdpf	0.392455	2.69e-93	0
Ndufb6	0.419663	4.35e-93	0
Aff4	0.397841	5.41e-93	0
Il11ra1	0.322735	7.59e-93	0
Myo10	0.268884	9.2e-93	0
Ak3	0.356499	9.86e-93	0
Acadvl	0.379073	1.37e-92	0
Thoc7	0.425401	1.81e-92	0
Cbr1	0.345929	5.48e-92	0
Dync1i2	0.38365	7.74e-92	0
Ccser2	0.351776	1.8e-91	0
Tvp23b	0.359732	3.46e-91	0
Srek1ip1	0.369345	5.63e-91	0
Tanc1	0.27579	6.96e-91	0
Kat2b	0.352496	1.67e-90	0
Spr	0.401066	2.99e-90	0
Mxra7	0.301235	3.16e-90	0
Gstt2	0.30851	1.49e-89	0
Tmed4	0.330366	2.78e-89	0
Btf3l4	0.400563	5.39e-89	0
Flnb	0.301636	2.4e-88	0
Eef1d	0.350045	2.93e-88	0
Ccs	0.344276	1.3e-87	0
Zfp637	0.294709	1.66e-87	0
Pts	0.368116	1.82e-87	0
Atp5a1	0.367469	3.07e-87	0
Ctsl	0.257793	3.84e-87	0
Fnbp1l	0.343351	5.43e-87	0
Prdx4	0.356694	1.6e-86	0
Hibadh	0.367565	3.63e-86	0
Creb3l2	0.287712	5.33e-86	0
Arl1	0.383199	7.02e-86	0
Rtn4	0.386102	1.02e-85	0
Morf4l1	0.305967	1.17e-85	0
Phactr4	0.325346	1.42e-85	0
Aco1	0.312354	1.46e-85	0
Myof	0.3745	1.52e-84	0
Med31	0.307867	1.71e-84	0
Pygb	0.351476	2.98e-84	0
Acaa1a	0.402573	3.3e-84	0
Aim1	0.287867	6.3e-84	0
Rab3d	0.288635	6.43e-84	0
Serpinb6a	0.344344	1.68e-83	0
Calm2	0.31483	2.28e-83	0
Rcn1	0.289215	3.36e-83	0
Gcsh	0.323701	3.75e-83	0
Sgce	0.279841	4.14e-83	0
Acaa2	0.352337	9.67e-83	0
Fkbp2	0.350908	3.22e-82	0
Ndufb7	0.370316	4.29e-82	0
Ppib	0.304529	3.05e-81	0
Mrpl14	0.370026	3.26e-81	0
Itga9	0.31829	3.81e-81	0
Mt1	0.533045	3.95e-81	0
Sypl	0.373453	6.2e-81	0
Ndufb3	0.37578	1.59e-80	0
Spcs1	0.313698	1.62e-80	0
Papss1	0.333594	1.8e-80	0
Acsl3	0.312058	2.48e-80	0
Rhoc	0.30773	2.73e-80	0
Dnajb4	0.345143	4.85e-80	0
Ip6k2	0.31914	4.86e-80	0
Dctn3	0.3843	6.62e-80	0
Slc9a3r1	0.380861	6.85e-80	0
Phf3	0.387509	1.62e-79	0
Sec22a	0.268761	2.08e-79	0
Plin3	0.342798	3.37e-79	0
Tspan3	0.31253	5.42e-79	0
Tuba4a	0.346058	1.25e-78	0
Pura	0.382683	1.34e-78	0
Slirp	0.385417	1.51e-78	0
Dpcd	0.351786	1.61e-78	0
Ier3	0.33282	1.9e-78	0
Vapa	0.384127	1.97e-78	0
Smim10l1	0.35242	2.4e-78	0
Wwtr1	0.250408	2.91e-78	0
Hipk2	0.327669	4.92e-78	0
Rbx1	0.349503	6.67e-78	0
Tagln2	0.338652	7.56e-78	0
Snrnp27	0.387833	1.29e-77	0
Ndufb11	0.393295	1.68e-77	0
Cox20	0.401583	1.78e-77	0
Txn1	0.282216	1.82e-77	0
Uqcrc2	0.379648	1.91e-77	0
Pik3ip1	0.284303	2.6e-77	0
Knop1	0.38495	5.12e-77	0
Ly6e	0.271684	6.05e-77	0
9530068E07Rik	0.356589	1.36e-76	0
Ginm1	0.325387	1.66e-76	0
Ppfibp1	0.256551	2.81e-76	0
Rnf11	0.336657	4.12e-76	0
Lrpap1	0.340748	5.15e-76	0
Fam173a	0.381077	8.88e-76	0
Pcbd2	0.371373	1.33e-75	0
Gcc2	0.365333	2.21e-75	0
Hax1	0.335396	4.27e-75	0
Pla2g16	0.34503	9.07e-75	0
Chmp2b	0.388367	1.32e-74	0
Eif3c	0.365397	2.85e-74	0
Hnrnph3	0.35707	3.79e-74	0
Tax1bp1	0.361662	5.25e-74	0
Ict1	0.366742	9.36e-74	0
Tns3	0.344272	1.1e-73	0
Pja2	0.322522	1.74e-73	0
Ggh	0.357089	3.15e-73	0
Vdac1	0.378303	4.63e-73	0
Chd6	0.338751	6.33e-73	0
Cfl2	0.327884	9.47e-73	0
Tmem106c	0.289236	1.21e-72	0
Khk	0.274953	1.44e-72	0
Prdx5	0.296414	1.65e-72	0
Slc35a1	0.291668	1.54e-71	0
1110065P20Rik	0.271543	1.97e-71	0
Ccdc90b	0.294905	2.02e-71	0
Mpc1	0.361432	3.22e-71	0
Nit2	0.27493	3.88e-71	0
Bcap31	0.367904	4.04e-71	0
Cox8a	0.272814	4.09e-71	0
Sssca1	0.335482	4.85e-71	0
Frrs1	0.280092	4.93e-71	0
Atraid	0.360552	5.7e-71	0
Bad	0.334794	6.4e-71	0
2010107E04Rik	0.321346	1.13e-70	0
Ndufc2	0.357365	1.53e-70	0
Tgif1	0.302779	5.46e-70	0
Pnpla8	0.321812	7.41e-70	0
Dgcr6	0.293806	9.79e-70	0
Fam63a	0.281979	1.15e-69	0
Ahcyl1	0.303212	2.33e-69	0
Rab18	0.339922	3.15e-69	0
Ndufs7	0.342375	3.19e-69	0
Mien1	0.379887	3.72e-69	0
AY036118	0.355804	4.17e-69	0
Mpst	0.30254	6.09e-69	0
Ndufs4	0.368011	9.65e-69	0
Zfp950	0.321657	1.12e-68	0
Sgf29	0.292961	1.79e-68	0
Carkd	0.305898	2.19e-68	0
Cetn2	0.346302	3.79e-68	0
Slc25a3	0.325503	4e-68	0
Pacsin2	0.342849	4.08e-68	0
Nfat5	0.315621	5.27e-68	0
Comt	0.353179	1.01e-67	0
Ndufb5	0.350301	4.25e-67	0
Tmem256	0.33035	4.58e-67	0
Polr2k	0.34402	5.56e-67	0
Mrpl50	0.297089	8.77e-67	0
Kif1b	0.33181	9.74e-67	0
Tbca	0.334104	1.29e-66	0
Polr2i	0.344571	2.24e-66	0
Elof1	0.306743	4.76e-66	0
Ndufv2	0.373438	5.28e-66	0
Ndufv1	0.321271	6.89e-66	0
Utrn	0.270354	8.8e-66	0
Acbd6	0.343028	9.7e-66	0
Alad	0.269641	1.76e-65	0
Ugp2	0.335029	1.85e-65	0
Cbx1	0.347645	2.22e-65	0
Ppp1r13b	0.262119	3.32e-65	0
Hsbp1	0.349183	3.47e-65	0
Flot1	0.272024	6.16e-65	0
Ndufa12	0.354177	7e-65	0
Pja1	0.277836	7.38e-65	0
Arpp19	0.326997	8.68e-65	0
Wdr61	0.327015	9.93e-65	0
2020-03-08	0.265749	3.67e-64	0
Lcor	0.277255	9.52e-64	0
Decr1	0.256601	3.56e-63	0
Ezr	0.320783	7.76e-63	0
Cpeb4	0.284003	8.04e-63	0
Vkorc1	0.303942	8.9e-63	0
Kif5b	0.335879	9.45e-63	0
Tkt	0.364081	1.4e-62	0
Cir1	0.32266	1.54e-62	0
Vimp	0.317193	1.6e-62	0
Ndufs3	0.337082	1.67e-62	0
2210016L21Rik	0.323412	1.68e-62	0
Pdcd6	0.334208	2.49e-62	0
Cox17	0.32093	2.62e-62	0
Sqstm1	0.31887	6.54e-62	0
Dhrs7	0.300077	7e-62	0
Nupr1	0.526878	1.59e-61	0
Tpm1	0.302129	1.62e-61	0
Wbp1	0.274678	1.75e-61	0
Ndufaf2	0.307607	2.17e-61	0
Lamp2	0.266578	2.96e-61	0
Jun	0.290494	3.45e-61	0
Psmb5	0.329958	3.65e-61	0
Zc3h14	0.300104	5.15e-61	0
Stk16	0.277475	5.38e-61	0
Ubxn2a	0.279561	6.73e-61	0
Dapk1	0.263817	8.85e-61	0
Slc4a2	0.263829	1.4e-60	0
Znhit1	0.351414	1.66e-60	0
Hdgf	0.320828	2.12e-60	0
Lims1	0.343131	2.76e-60	0
Canx	0.304226	3.68e-60	0
Casp6	0.259271	3.97e-60	0
Atp5g2	0.277791	4.2e-60	0
4930402H24Rik	0.255343	4.74e-60	0
Amn1	0.266801	8.25e-60	0
Txndc17	0.312981	2.33e-59	0
Dynlrb1	0.323565	4.3e-59	0
Psmc5	0.317002	5.15e-59	0
Tbrg1	0.330147	5.96e-59	0
Clpx	0.288729	7.4e-59	0
Tmbim4	0.308053	9.4e-59	0
Emc4	0.288555	1.17e-58	0
Ube2b	0.349017	1.43e-58	0
Psmc6	0.320837	3.45e-58	0
Cd164	0.315235	4.56e-58	0
Sars	0.330393	4.9e-58	0
Krcc1	0.347319	6.28e-58	0
Magoh	0.307653	1.21e-57	0
Ptpn9	0.251518	1.43e-57	0
Dctn2	0.325174	1.64e-57	0
Suco	0.283228	1.9e-57	0
1810022K09Rik	0.338812	2.99e-57	0
Plscr3	0.258616	4.15e-57	0
Pdcl3	0.301415	6.04e-57	0
Slc25a51	0.297718	6.15e-57	0
Rpp25l	0.303755	8.19e-57	0
Ubxn1	0.334566	1.06e-56	0
Lifr	0.297801	1.12e-56	0
2020-03-02	0.304411	1.67e-56	0
Mrps12	0.319641	6.37e-56	0
Immp1l	0.291476	8.44e-56	0
Nol7	0.318312	9.81e-56	0
Naa38	0.340215	1.05e-55	0
Acp1	0.313132	1.09e-55	0
Mrpl24	0.311945	1.51e-55	0
Mrpl38	0.276053	1.96e-55	0
Cyc1	0.321812	2.28e-55	0
Mrpl48	0.31496	5.66e-55	0
Atp13a3	0.29855	7.11e-55	0
Pfdn6	0.318817	9.33e-55	0
Ndufv3	0.310908	9.5e-55	0
Med29	0.273797	9.85e-55	0
Txndc9	0.320075	1.23e-54	0
Spg20	0.261903	1.57e-54	0
Erh	0.284526	2.05e-54	0
Psmc3	0.312604	3.23e-54	0
Psma5	0.309356	3.53e-54	0
Sptan1	0.272856	3.6e-54	0
Ttc3	0.324844	4.38e-54	0
Vdac2	0.30212	4.42e-54	0
Zfp395	0.259863	5.18e-54	0
Cyth2	0.269698	1.09e-53	0
Poldip2	0.2519	1.22e-53	0
Fam107b	0.298376	1.44e-53	0
Stk11	0.305658	1.44e-53	0
2310009B15Rik	0.256851	1.66e-53	0
Huwe1	0.318916	9.83e-53	0
Ddb1	0.304957	2.07e-52	0
Pdap1	0.311574	2.34e-52	0
Ifrd1	0.283465	2.46e-52	0
Churc1	0.307666	2.74e-52	0
Smdt1	0.297034	3.34e-52	0
Uri1	0.2872	8.5e-52	0
Rnaseh2c	0.322639	9.73e-52	0
Dad1	0.279215	2.57e-51	0
Gramd3	0.26519	2.59e-51	0
Mfsd11	0.266903	3.66e-51	0
Akr7a5	0.264084	3.77e-51	0
Mycbp	0.26131	5.16e-51	0
Luc7l3	0.301772	6.2e-51	0
Mvb12a	0.283741	7.55e-51	0
2310039H08Rik	0.266934	1.79e-50	0
Unc50	0.268741	2.17e-50	0
Tbcb	0.2906	3.01e-50	0
Vps36	0.300138	3.52e-50	0
mt-Nd5	0.271849	3.8e-50	0
Zmiz1	0.301798	5.32e-50	0
Tshz1	0.260703	8.03e-50	0
Clpp	0.269452	8.39e-50	0
Jund	0.294603	1.06e-49	0
Insig2	0.25913	2.35e-49	0
Zmat2	0.317241	3.69e-49	0
Mbnl2	0.273222	4.09e-49	0
Etfa	0.304754	6.02e-49	0
Ssbp3	0.26752	8.57e-49	0
Chchd1	0.308548	2.05e-48	0
Gng12	0.279118	2.31e-48	0
Psma1	0.294347	2.37e-48	0
Gtf3c6	0.282788	3.61e-48	0
Commd6	0.303333	4.24e-48	0
Cox19	0.264484	5.24e-48	0
Bnip3l	0.284002	5.98e-48	0
Ano6	0.260688	1.03e-47	0
H2-Ke6	0.269806	1.14e-47	0
D10Jhu81e	0.28435	1.42e-47	0
Aamp	0.307331	1.48e-47	0
Psma6	0.298951	1.61e-47	0
Mrps18a	0.305689	1.64e-47	0
Midn	0.26124	1.69e-47	0
Pdcd5	0.297588	2.13e-47	0
Mrpl54	0.294921	2.46e-47	0
Mrpl27	0.276242	2.71e-47	0
Eif3g	0.286624	4.19e-47	0
Cox14	0.295673	5.38e-47	0
Rab2a	0.271485	1.02e-46	0
Polr1c	0.279426	1.3e-46	0
Nfe2l1	0.263711	2.81e-46	0
Ubl4a	0.276521	3.06e-46	0
Bccip	0.281175	3.75e-46	0
Cyb5a	0.268361	5.46e-46	0
Filip1l	0.28267	6.11e-46	0
Mid1ip1	0.257542	8.94e-46	0
Aldoa	0.253187	1.45e-45	0
Golga4	0.295541	1.78e-45	0
Gon4l	0.2577	5.06e-45	0
Ssb	0.279875	5.28e-45	0
1500011K16Rik	0.283286	5.32e-45	0
Ufc1	0.28011	6.32e-45	0
Vdac3	0.289493	7.11e-45	0
Dtymk	0.262633	7.56e-45	0
Ccdc47	0.283133	1.12e-44	0
Mrpl51	0.297258	1.59e-44	0
Aimp1	0.294447	1.59e-44	0
Atp5c1	0.265912	3.61e-44	0
Clcc1	0.26488	3.79e-44	0
Drap1	0.281703	4.12e-44	0
Myeov2	0.270572	5.95e-44	0
Lyrm2	0.261865	6.34e-44	0
Atp6v1f	0.268912	7.69e-44	0
Yipf4	0.260831	1.07e-43	0
Sra1	0.279836	1.18e-43	0
Adh5	0.274309	2.08e-43	0
Itgav	0.256523	2.72e-43	0
Pin4	0.27435	4.25e-43	0
Stx8	0.260627	4.29e-43	0
Nfe2l2	0.259297	4.37e-43	0
l7Rn6	0.26001	5e-43	0
Bcas2	0.28193	5.17e-43	0
Ppp2r5a	0.286295	2.64e-42	0
Emc7	0.262058	2.8e-42	0
Sar1b	0.252424	8.29e-42	0
Copb2	0.273338	1.08e-41	0
Sec11a	0.25675	1.3e-41	0
Rheb	0.282551	1.48e-41	0
Gsk3b	0.263119	2.8e-41	0
Txnl1	0.273123	3.04e-41	0
Ccni	0.263954	3.35e-41	0
Psma2	0.251475	8.05e-41	0
Hspd1	0.267105	8.07e-41	0
Tmco1	0.260462	1.16e-40	0
Rrp1	0.275431	1.58e-40	0
Mlf2	0.269263	3.72e-40	0
Commd3	0.264841	8.09e-40	0
Pcm1	0.274739	1.37e-39	0
Prrc2b	0.2561	1.7e-39	0
Smim11	0.257762	3.45e-39	0
Dpm3	0.257589	3.88e-39	0
Hypk	0.255412	6.04e-39	0
Mrpl42	0.25771	6.61e-39	0
Ash1l	0.254429	8.46e-39	0
Ube3a	0.255766	1.03e-38	0
Cers2	0.261045	1.22e-38	0
Cope	0.255479	1.5e-38	0
Sdha	0.273829	1.61e-38	0
Cdk4	0.262433	4.01e-38	0
Hspa9	0.255301	1.1e-37	0
Senp6	0.266638	2.76e-37	0
Mkln1	0.268341	6.55e-37	0
Mrpl30	0.265086	6.72e-37	0
Prpf19	0.26628	1e-36	0
Ctage5	0.261625	1.67e-36	0
Higd2a	0.261507	2.81e-36	0
Cops6	0.255104	2.99e-36	0
Eny2	0.255126	2.45e-35	0
U2af1	0.255059	1.6e-34	0
Rsu1	0.251658	2.98e-33	0
Upf3b	0.260903	5.55e-33	0
Ociad1	0.252051	2.22e-30	0
2810428I15Rik	0.252671	1.19e-29	0
Ms4a4b	2.25462	0	1
Cd3d	2.11382	0	1
Cd3g	2.06199	0	1
Cd8b1	1.66554	0	1
Lck	1.61623	0	1
Nkg7	1.56712	0	1
Lef1	1.49357	0	1
Dapl1	1.44012	0	1
Bcl11b	1.41279	0	1
Tcf7	1.38931	0	1
Hcst	1.3808	0	1
Thy1	1.37236	0	1
Lat	1.36572	0	1
Tmsb10	1.3433	0	1
Skap1	1.31425	0	1
Satb1	1.26496	0	1
Gimap3	1.21918	0	1
Ptprcap	1.21827	0	1
Ltb	1.21399	0	1
Limd2	1.21302	0	1
Rpl12	1.20562	0	1
Cd3e	1.20438	0	1
Cd2	1.14718	0	1
Cd27	1.13839	0	1
Txk	1.11612	0	1
Rps15a	1.10973	0	1
Gimap4	1.10959	0	1
2020-09-01	1.10475	0	1
Il7r	1.09582	0	1
Shisa5	1.0821	0	1
Sell	1.07039	0	1
Rps7	1.03525	0	1
Rac2	1.02967	0	1
Cd52	1.00774	0	1
Rps27	1.00403	0	1
Ptprc	1.00178	0	1
Rps16	0.970952	0	1
Rpl13a	0.966236	0	1
Rplp0	0.958781	0	1
Itgb7	0.955145	0	1
Rps24	0.939483	0	1
Rpsa	0.925961	0	1
Rps6	0.893186	0	1
Rps18	0.888138	0	1
Cd247	0.867541	0	1
Rps13	0.866929	0	1
Rpl13	0.859639	0	1
Rps19	0.856776	0	1
Ccr7	0.854367	0	1
Rpl17	0.853739	0	1
Fam189b	0.852959	0	1
Rps20	0.852437	0	1
Rps27rt	0.845175	0	1
Rpl19	0.841348	0	1
Rps26	0.831075	0	1
Rpl8	0.828714	0	1
Rplp2	0.813587	0	1
Ctsw	0.810436	0	1
Rpl39	0.801892	0	1
Rps10	0.798068	0	1
Cd5	0.793597	0	1
Rpl32	0.791172	0	1
Rps3	0.790028	0	1
Rpl5	0.787963	0	1
Rpl36a	0.786958	0	1
Rpl27	0.785577	0	1
Uba52	0.783315	0	1
Prkcq	0.78153	0	1
Rplp1	0.780631	0	1
Rpl18a	0.778544	0	1
Itk	0.776001	0	1
Rps23	0.772722	0	1
Rps14	0.771867	0	1
Rps3a1	0.768102	0	1
Rpl18	0.76031	0	1
Rpl30	0.756883	0	1
Klk8	0.750784	0	1
Rps28	0.749848	0	1
Rpl4	0.73401	0	1
Rps15	0.733949	0	1
Rps4x	0.731207	0	1
Rpl9	0.726219	0	1
Rpl35	0.712206	0	1
Rps5	0.710408	0	1
Rpl3	0.70802	0	1
Rpl10a	0.697144	0	1
Rpl37a	0.695933	0	1
Rps11	0.691761	0	1
Rps8	0.682666	0	1
Rpl36	0.68227	0	1
Rpl23a	0.664389	0	1
Rpl34	0.663459	0	1
Rpl11	0.661959	0	1
Rps21	0.656343	0	1
Rpl23	0.650351	0	1
Rpl27a	0.640925	0	1
Tpt1	0.637516	0	1
Rpl21	0.627364	0	1
Rpl31	0.627114	0	1
Rps29	0.622568	0	1
Rps27a	0.601757	0	1
Rpl37	0.592502	0	1
Rpl6	0.590294	0	1
Rpl38	0.557719	0	1
Rps9	0.556703	0	1
Rpl35a	0.531116	0	1
Eef1a1	0.511077	0	1
Rpl26	0.506745	0	1
Rpl41	0.481261	0	1
Rps2	0.652576	7.83e-304	1
Rpl7	0.54384	1.3e-302	1
Gnb2l1	0.671407	1.22e-298	1
Rpl14	0.594297	3e-298	1
Cd28	0.807737	1.92e-297	1
Coro1a	0.89253	2.64e-295	1
Ets1	1.00193	2.73e-295	1
Cd8a	1.03967	5.24e-294	1
Eef1b2	0.783678	7.75e-293	1
Themis	0.599263	3.03e-290	1
H2-Q7	0.983425	1.11e-281	1
Rps17	0.529582	2.26e-280	1
Fau	0.532815	1.93e-279	1
Gm10073	0.737833	7.44e-273	1
Dgka	0.779613	3.7e-267	1
Sh2d1a	0.613131	2.77e-257	1
Zap70	0.585641	2.89e-257	1
Ipcef1	0.667651	4.69e-252	1
Cd6	0.637844	9.37e-252	1
Cytip	0.919197	8.48e-247	1
Gimap6	0.852904	2.02e-245	1
Rpl15	0.657205	6.66e-244	1
Ms4a6b	0.935997	4.81e-242	1
Il2rg	0.856239	6.5e-241	1
Rpl22l1	0.742618	2.96e-239	1
Rps25	0.465004	1.46e-236	1
Rpl22	0.505328	2.56e-236	1
Btg1	0.793587	2.72e-234	1
Klrd1	0.788738	3.44e-234	1
Rpl24	0.483262	6.78e-234	1
Ccnd2	0.861884	4.5e-224	1
Gimap1	0.827422	5.38e-217	1
Gm12840	0.886525	7.26e-214	1
Slfn1	0.663008	3.51e-209	1
Fxyd5	0.792753	3.92e-209	1
Rhoh	0.838001	8.83e-204	1
Arhgdib	0.749659	1.08e-203	1
Rpl28	0.445639	1.68e-202	1
Rps12	0.482011	7.31e-202	1
Arl4c	0.92522	1.28e-197	1
Inpp4b	0.670105	1.32e-197	1
Hsd11b1	0.556181	3.09e-197	1
Rinl	0.705878	3.53e-197	1
Tnik	0.595685	1.14e-192	1
Eef1g	0.585249	6.23e-189	1
Rpl29	0.510817	2.08e-188	1
Spn	0.666835	2.01e-185	1
Tox	0.605388	8.66e-181	1
Bin2	0.735537	2.04e-179	1
Leprotl1	0.768536	2.19e-179	1
Npm1	0.602752	2.16e-178	1
Gm9493	0.770463	3.31e-178	1
Chd3	0.815718	9.51e-178	1
Fam78a	0.566832	8.32e-177	1
Acp5	0.646765	1.11e-175	1
Arhgef1	0.785546	2.25e-174	1
Tnfrsf18	0.609091	9.88e-174	1
Tbc1d10c	0.666667	3.03e-171	1
Hmha1	0.751852	2.33e-169	1
Pabpc1	0.574119	3.04e-168	1
Tspan32	0.737651	1.13e-167	1
Pdcd4	0.779842	1.12e-165	1
Cd69	0.696554	5.13e-164	1
Kbtbd11	0.594158	1.37e-160	1
AW112010	0.83136	2.79e-160	1
Wdr89	0.632328	5.85e-158	1
Gm8730	0.718347	1.43e-157	1
Emb	0.692948	2.1e-155	1
Fyb	0.620422	1.22e-154	1
Fam65b	0.685384	1.84e-151	1
Gm8369	0.696632	2.39e-149	1
Rpl23a-ps3	0.591637	5.41e-145	1
Arhgap15	0.694761	6.62e-144	1
Cnn2	0.72106	7.51e-144	1
Rasal3	0.549354	5.52e-142	1
Runx3	0.653416	9.91e-142	1
Saraf	0.733412	5.18e-138	1
Dusp2	0.652557	1.89e-135	1
Selplg	0.711638	2e-135	1
Ptpn22	0.581097	7.73e-134	1
Gimap7	0.569	2.53e-133	1
Eif3e	0.602843	4.11e-130	1
2020-09-06	0.620099	2.22e-129	1
Gimap5	0.595501	2.34e-129	1
Jakmip1	0.473241	2.63e-128	1
Traf3ip3	0.600733	9.07e-128	1
Smc4	0.806092	1.51e-127	1
Ablim1	0.615415	2.86e-126	1
Rapgef6	0.725013	2.57e-125	1
Ptpn18	0.506672	1.38e-121	1
Naca	0.395061	1.97e-119	1
Smad7	0.599058	8.17e-118	1
Ikzf1	0.629823	4.93e-117	1
Jak1	0.640515	1.36e-116	1
B4galnt1	0.625489	3.9e-116	1
Pfn1	0.419085	8.61e-116	1
H2-K1	0.380523	3.85e-113	1
Bcl2	0.770741	5.58e-112	1
Rpl7a	0.382232	2.16e-111	1
Slamf6	0.591057	5.32e-111	1
Stk17b	0.582973	8.66e-110	1
Pydc3	0.514268	1.76e-109	1
S1pr4	0.443635	2e-108	1
Gm4955	0.53046	1.72e-106	1
S1pr1	0.589839	4.55e-106	1
Rasgrp1	0.556258	1.23e-105	1
Srpk1	0.600163	1.54e-102	1
Peli1	0.656011	4.82e-102	1
Itgal	0.495576	3.25e-97	1
Gimap9	0.548096	3.47e-97	1
Sp100	0.583013	6.58e-95	1
Rbm38	0.485078	1.8e-94	1
Gimap8	0.437822	1.94e-93	1
Evl	0.590988	6.49e-93	1
Atp1b3	0.608941	8.82e-91	1
Pdk1	0.505755	2.28e-87	1
4930523C07Rik	0.571856	2.67e-87	1
Gm9843	0.446838	1.32e-85	1
Snrpg	0.411716	2.47e-85	1
Rasgrp2	0.548182	4.08e-84	1
Tecpr1	0.502157	4.16e-83	1
Gm10076	0.340331	3.72e-81	1
Gm9844	0.51147	4.76e-81	1
Sh3kbp1	0.546183	5.3e-81	1
Sp110	0.488827	6.5e-77	1
Arhgap9	0.475104	6.51e-77	1
Rpl36al	0.312581	1.49e-76	1
Ldha	0.503268	1.28e-74	1
Cd53	0.456355	2.73e-73	1
Fyn	0.502898	1.01e-72	1
Eef2	0.334198	3.47e-72	1
Gm11808	0.476796	5.59e-70	1
Traf1	0.40742	1.28e-69	1
Mbnl1	0.390441	1.51e-69	1
Dock2	0.509448	1.64e-69	1
Rps12-ps3	0.421395	5.24e-68	1
Psmb8	0.365516	3.82e-64	1
Pydc4	0.447335	4.83e-63	1
Rpl27-ps3	0.482873	1.85e-62	1
Lfng	0.444536	3.62e-62	1
Rbm3	0.391594	6.38e-62	1
Ifi47	0.446904	8.87e-62	1
Gm26740	0.45416	9.16e-62	1
Gramd1a	0.426284	3.05e-60	1
Slfn2	0.515246	3.79e-60	1
Vasp	0.48703	4.46e-60	1
Cdk2ap2	0.482206	2.89e-59	1
Sesn3	0.462618	5.15e-58	1
Gpsm3	0.446959	1.18e-57	1
Mettl23	0.454715	2.08e-57	1
Npm3	0.4662	7.4e-55	1
Tomm20	0.414612	3.2e-54	1
Cdkn2d	0.420453	5.65e-54	1
Cfl1	0.27728	6.51e-54	1
Ccnd3	0.444039	1.61e-52	1
Pik3cd	0.434197	5.53e-52	1
Foxo1	0.451714	6.49e-52	1
Rpl9-ps6	0.452011	1.21e-50	1
Gmfg	0.394632	4e-50	1
Klf2	0.318442	5.1e-50	1
Ddx21	0.478396	9.86e-50	1
Apbb1ip	0.419972	9.15e-49	1
Stk4	0.445197	1.58e-48	1
Cox7a2l	0.335896	1.75e-48	1
Il21r	0.366734	1.14e-46	1
Pik3ip1	0.42964	4.37e-46	1
Cotl1	0.337329	1.26e-45	1
Mllt3	0.394972	1.81e-45	1
Eif3f	0.314627	3.1e-45	1
Crlf3	0.44385	3.31e-45	1
Abracl	0.403075	1.26e-44	1
Bzw2	0.401427	1.59e-44	1
Hspe1	0.35712	1.15e-43	1
Tes	0.407465	2.43e-43	1
Eif3h	0.328647	4.84e-43	1
Stat1	0.569545	5.79e-43	1
Rpl36-ps3	0.418742	2.43e-42	1
Grk6	0.383227	2.56e-42	1
Hnrnpf	0.305133	3.48e-39	1
Snrpf	0.324349	5.75e-39	1
Mif	0.39272	8.11e-39	1
Actn1	0.403534	2.71e-38	1
Rgs10	0.309698	3.16e-38	1
Sash3	0.374194	1.54e-37	1
Trim12a	0.409875	1.7e-37	1
Gltscr2	0.313923	2.55e-37	1
Rassf5	0.354819	5.43e-37	1
Ifi203	0.339172	3.97e-36	1
Msn	0.302184	5.67e-36	1
Emg1	0.354737	5.9e-36	1
Rpl13-ps3	0.389859	1.44e-35	1
Atp11b	0.400854	2.44e-34	1
Mndal	0.30279	2.63e-34	1
Ankrd44	0.382069	2.66e-34	1
Rps26-ps1	0.379308	2.43e-33	1
Nme1	0.335768	4.92e-33	1
Gm2000	0.372559	1.2e-32	1
Pycard	0.375538	4.57e-32	1
Pyhin1	0.382858	5.7e-32	1
Gm6133	0.363127	9.92e-32	1
Psme2	0.310481	1.26e-31	1
H2-T22	0.359254	1.84e-31	1
Epsti1	0.371707	4.36e-31	1
Dock10	0.351981	1.14e-30	1
Gm26917	0.367728	2.16e-30	1
Nop10	0.316941	2.8e-30	1
Rpl6l	0.360427	2.93e-30	1
Stk38	0.392129	3.35e-29	1
Kcnn4	0.346654	8.61e-28	1
Slc25a5	0.266034	2.4e-27	1
Junb	0.333543	2.56e-27	1
Ppp1r18	0.323494	9.97e-27	1
Whsc1l1	0.352809	1.18e-24	1
Tra2b	0.308953	3.28e-24	1
Chd2	0.361616	7.8e-24	1
Dnajc15	0.414426	8.99e-24	1
Pitpnc1	0.291654	2.38e-23	1
AI467606	0.303466	2.52e-23	1
Supt4a	0.303221	9.93e-23	1
Ssh2	0.262138	4.16e-21	1
Psip1	0.288992	4.79e-21	1
Mitd1	0.356666	1.09e-20	1
Eif3i	0.283469	3.26e-20	1
Klf13	0.316318	1.08e-19	1
Rps18-ps3	0.305133	1.23e-19	1
Snrpd3	0.299339	7.47e-19	1
Fkbp3	0.301922	2.47e-17	1
Fubp1	0.278918	6.74e-17	1
H2-Q4	0.26117	1.26e-16	1
Itgb2	0.28302	1.36e-16	1
Zfos1	0.276336	1.98e-16	1
Taf1d	0.297351	2.82e-16	1
Lsm4	0.26487	4.46e-16	1
Xrn2	0.289853	2.09e-15	1
Trp53	0.311965	2.49e-15	1
Gm10036	0.289897	3.02e-15	1
Pkm	0.274426	5.01e-15	1
Myh9	0.271692	2.41e-14	1
Gm10020	0.286329	3.21e-14	1
Fbl	0.273771	3.55e-14	1
Setx	0.288493	2.63e-13	1
Rnf167	0.271509	5.2e-13	1
Zc3hav1	0.269621	7.05e-13	1
Dusp11	0.264816	3.12e-12	1
Bola2	0.26429	1.08e-11	1
Lbh	0.251216	2.02e-11	1
Smc6	0.295493	2.99e-11	1
Itga4	0.344974	1.03e-10	1
Tuba4a	0.25636	3.89e-10	1
Cx3cr1	1.8486	0	2
Lyz2	1.78337	0	2
H2-Eb1	1.70943	0	2
C1qb	1.67016	0	2
H2-Aa	1.64669	0	2
H2-Ab1	1.58441	0	2
Ctss	1.58033	0	2
C1qc	1.5616	0	2
C1qa	1.53669	0	2
Fcer1g	1.48741	0	2
Tyrobp	1.47804	0	2
Ms4a7	1.47141	0	2
Cd74	1.40398	0	2
Hexb	1.39558	0	2
Aif1	1.35962	0	2
Ftl1	1.20554	0	2
Mpeg1	1.19784	0	2
H2-DMb1	1.17635	0	2
Apoe	1.16819	0	2
C3ar1	1.16151	0	2
Clec12a	1.15794	0	2
Lgmn	1.14733	0	2
Trem2	1.12676	0	2
Fcgr3	1.12232	0	2
Csf1r	1.1191	0	2
Alox5ap	1.11268	0	2
Lair1	1.10937	0	2
AF251705	1.10838	0	2
Adgre1	1.09942	0	2
Cst3	1.09743	0	2
Slamf9	1.09741	0	2
Lst1	1.09141	0	2
Pid1	1.0867	0	2
Ctsc	1.08527	0	2
Psap	1.05945	0	2
Cd68	1.04794	0	2
Cxcl16	1.04558	0	2
Cybb	1.04437	0	2
Ly86	1.04171	0	2
Ctsb	1.03329	0	2
Zeb2	1.02655	0	2
Mafb	1.0263	0	2
Fcrls	1.02161	0	2
Ccr5	1.0174	0	2
Spi1	0.992398	0	2
Fth1	0.981944	0	2
Clec4a2	0.973333	0	2
P2ry6	0.956128	0	2
Ms4a6c	0.955084	0	2
Axl	0.884742	0	2
Maf	0.881178	0	2
Dab2	0.810935	0	2
Mrc1	0.806689	0	2
Tmsb4x	0.75077	0	2
Lilra5	0.717204	0	2
Bcl2a1b	0.967479	1.01e-302	2
H2-DMa	1.06878	1.7e-293	2
Unc93b1	0.88985	4.65e-291	2
Pld4	0.909478	3.01e-287	2
Sepp1	0.868288	3.72e-284	2
Marcks	0.93725	3.91e-282	2
Hpgd	0.989899	2.99e-279	2
Basp1	0.833272	3.55e-276	2
Cfh	0.78035	2.84e-275	2
Hexa	0.835833	4.2e-273	2
Rgs10	0.89187	6.66e-271	2
Trf	0.801557	4.07e-269	2
Tgfbi	0.749471	4.32e-269	2
Pf4	0.863189	2.58e-267	2
Lpl	0.95689	3.18e-266	2
Stab1	0.82335	4.32e-266	2
Clec4a1	0.840459	6.82e-264	2
Gatm	0.820385	2.5e-258	2
Hpgds	0.78491	2.21e-256	2
Gpx1	0.895381	7e-256	2
Adap2	0.667883	8.34e-255	2
Slc11a1	0.703998	2.2e-253	2
Laptm5	0.805202	2.01e-251	2
Clec4a3	0.78811	2.73e-251	2
Cbr2	0.89031	1.4e-249	2
AI607873	0.783891	4.43e-249	2
Slc15a3	0.740399	9.09e-246	2
Fcgr1	0.725986	1.07e-245	2
Grn	0.777731	2.66e-245	2
Serinc3	0.790868	3.9e-244	2
Cd14	0.903925	3.21e-241	2
Npc2	0.739877	4.2e-238	2
Lilrb4a	0.702655	2.72e-237	2
C5ar1	0.737869	2.2e-236	2
Pla2g7	0.743429	9.94e-236	2
Ccl9	0.854399	1.59e-232	2
Evi2a	0.76767	2.19e-231	2
Wfdc17	0.74892	7.9e-231	2
Sirpa	0.777766	5.87e-230	2
Gpr65	0.832751	1.1e-228	2
Cd33	0.737955	4.61e-224	2
Ccl6	0.802964	1.55e-223	2
Olfml3	0.584863	2.53e-221	2
Clps	0.780122	1.96e-215	2
Ckb	0.79839	6.25e-215	2
Vsir	0.770404	2.32e-214	2
Ctsh	0.783654	2.51e-211	2
Lpcat2	0.645713	1.15e-210	2
Cyth4	0.737702	1.42e-208	2
Rab7b	0.63264	4.41e-208	2
Itm2b	0.586697	1.58e-205	2
Fos	0.978168	7.74e-204	2
Fcgr2b	0.696702	1.34e-202	2
Cyba	0.640515	2.89e-199	2
Pirb	0.681775	4.4e-198	2
Ctsz	0.828545	4.82e-198	2
Apobec1	0.744003	1.05e-197	2
Metrnl	0.740656	5.75e-195	2
Cd36	0.70073	1.14e-194	2
Atp2b1	0.750401	7.93e-194	2
Emp3	0.787877	9.35e-194	2
Sdc3	0.736763	8.08e-193	2
Fcgr4	0.546848	2.87e-192	2
Actb	0.621285	2.07e-191	2
Fyb	0.743816	3.79e-191	2
Snx5	0.718322	6.5e-191	2
Abhd12	0.696329	5.84e-190	2
Lrp1	0.673825	7.9e-189	2
Ctsa	0.701522	1.94e-186	2
Cd300ld	0.570284	6.49e-185	2
Itgb5	0.688379	1.58e-183	2
Ccdc109b	0.567634	8.1e-183	2
Ehd4	0.593578	3.88e-182	2
Gpr34	0.720242	3.49e-181	2
Cyfip1	0.696953	3.93e-181	2
Lilr4b	0.578679	4.15e-180	2
Tm6sf1	0.684496	2.22e-179	2
Lcp1	0.721561	9.37e-179	2
Clec4b1	0.587865	5.88e-178	2
Rassf4	0.670812	3.95e-177	2
Kctd12	0.667896	1.13e-175	2
Ms4a6d	0.554757	1.12e-174	2
Lrrc25	0.580475	1.37e-174	2
Wwp1	0.702001	2.39e-173	2
Runx1	0.706327	2.86e-172	2
Lgals1	0.716433	5.51e-170	2
Mgl2	0.706992	7.95e-170	2
Man2b1	0.668436	7.56e-169	2
Igsf6	0.518166	1.12e-168	2
F13a1	0.369761	1.19e-168	2
Arrb2	0.681577	1.22e-168	2
Ntpcr	0.658881	1.48e-166	2
Sh3bgrl3	0.53435	6.07e-166	2
Rnase4	0.6169	2.04e-165	2
Cltc	0.589305	7.46e-165	2
Lamp1	0.599923	3.65e-164	2
Lacc1	0.584437	3.82e-163	2
Siglece	0.515443	8.15e-163	2
Ifi27l2a	0.628274	1.46e-161	2
Slco2b1	0.577633	1.61e-160	2
Myo1f	0.553357	4.29e-158	2
Col14a1	0.404555	2.42e-157	2
Tgfbr1	0.726654	2.56e-157	2
Tmem106a	0.591618	9.24e-157	2
Gm10116	0.684095	3.82e-156	2
Itgam	0.601826	9.57e-156	2
Plbd1	0.514607	1.14e-155	2
Pou2f2	0.695803	9.98e-154	2
Tmcc1	0.664031	6.46e-153	2
Capza2	0.6091	1.19e-151	2
Ifi204	0.589504	1.41e-150	2
Tbxas1	0.501682	3.15e-150	2
Fam46a	0.643739	8.6e-150	2
Rab3il1	0.54832	1.65e-149	2
Ptpro	0.537166	2.63e-149	2
Ncf2	0.575319	5.12e-149	2
Mef2c	0.549161	3.68e-147	2
Skap2	0.61671	1.65e-145	2
Tpd52	0.625673	3.9e-144	2
Cd300a	0.45182	6.99e-143	2
Arpc1b	0.547065	1.32e-140	2
Milr1	0.50235	3.56e-140	2
Lgals3	1.30864	1.07e-139	2
Blvrb	0.605889	2.48e-137	2
Lyn	0.630504	3.38e-137	2
Pltp	0.575054	5.19e-137	2
Irf8	0.48662	6.15e-136	2
Efhd2	0.662946	1.3e-135	2
Abca9	0.500047	3.94e-135	2
Zeb2os	0.472367	1.2e-134	2
Tifab	0.420295	1.89e-133	2
Clec5a	0.413632	2.33e-133	2
Myo5a	0.547777	1.06e-132	2
Msr1	0.506443	3.57e-132	2
Plekho1	0.562062	6.31e-131	2
Ptpre	0.566485	2.01e-130	2
Rbpj	0.611603	6.96e-129	2
Nrp1	0.279605	2.05e-127	2
Ccl12	1.17083	2.94e-127	2
Rin2	0.499149	3.23e-127	2
Pea15a	0.557248	4.72e-127	2
Lmo2	0.527052	3.07e-126	2
Ppfia4	0.466054	1.08e-125	2
Arl11	0.380616	2.45e-124	2
Csf2ra	0.586633	3.04e-124	2
Pla2g15	0.461376	7.07e-122	2
Fxyd5	0.574107	1.75e-121	2
Batf3	0.430809	3.66e-121	2
Tmem86a	0.432775	1.08e-120	2
Mef2a	0.639933	6.76e-120	2
Cotl1	0.556363	3.19e-119	2
Cysltr1	0.439559	3.37e-118	2
Asah1	0.599275	3.66e-118	2
Hck	0.450527	1.88e-117	2
B2m	0.391749	6.37e-117	2
Cttnbp2nl	0.526712	1.2e-116	2
Tmem176b	0.525311	2.25e-116	2
Rrbp1	0.497799	2.64e-116	2
Ifngr1	0.557502	4.19e-115	2
Ucp2	0.545823	4.53e-115	2
Ophn1	0.490464	9.33e-114	2
Camk1d	0.4684	1.31e-113	2
Zfhx3	0.571629	4.3e-113	2
Timp2	0.430481	8.1e-113	2
Tnfrsf11a	0.42197	1.52e-112	2
Inpp5d	0.530517	3.33e-112	2
Cd302	0.459275	3.34e-112	2
Plek	0.542504	1.79e-111	2
Tmem37	0.455546	2.23e-111	2
Dse	0.460277	2.71e-111	2
Clta	0.431271	1.02e-110	2
Hcls1	0.544171	3.55e-110	2
Cebpa	0.494857	6.35e-110	2
Folr2	0.283778	6.73e-110	2
Arpc2	0.470951	1.31e-108	2
Cd48	0.523632	1.78e-108	2
Nckap1l	0.516628	8.5e-108	2
Rtn4	0.508885	3.56e-107	2
Crip1	0.510848	4.11e-107	2
Lat2	0.476563	1.74e-106	2
Nrros	0.4789	1e-105	2
Cd84	0.537228	1.64e-105	2
Pmp22	0.506966	2.41e-104	2
Ccr2	0.929993	2.68e-104	2
Tlr2	0.459374	5.04e-104	2
Il10ra	0.428415	7.18e-104	2
Klf6	0.5935	1.68e-103	2
Atp6v0b	0.504707	1.84e-103	2
Tmem176a	0.493619	1.07e-102	2
Ifitm3	0.429929	2.72e-102	2
Tanc2	0.405223	8.86e-102	2
Tnfaip8l2	0.487446	9.63e-102	2
Irf5	0.472788	8.65e-101	2
Hk2	0.448814	1.48e-100	2
Dpysl2	0.532758	3.29e-100	2
Scpep1	0.485372	4.74e-100	2
Pmepa1	0.676855	6.64e-100	2
Fam105a	0.48254	2.79e-99	2
Cd163	0.455583	8.31e-99	2
Try4	0.526102	9.45e-99	2
Sat1	0.500406	1.53e-98	2
Prcp	0.476252	1.76e-97	2
Sdcbp	0.527623	4.07e-97	2
Lipa	0.519594	1.28e-96	2
Gas7	0.480701	3.86e-96	2
Rap1b	0.506875	1.71e-94	2
Pla2g1b	0.534771	1.98e-94	2
Ncf1	0.456681	2.86e-93	2
Gpr183	0.492323	1.04e-92	2
Cd93	0.401879	1.67e-92	2
Il10rb	0.491604	3.53e-92	2
Cd83	0.55914	8.24e-91	2
Gnai2	0.401384	3.38e-90	2
Tlr7	0.378326	2.06e-89	2
Bst2	0.460949	5.44e-89	2
Fcgrt	0.4195	1.15e-88	2
Gusb	0.477953	8.35e-88	2
Ptafr	0.428385	9.14e-88	2
Slc29a3	0.425149	3.48e-87	2
Hacd4	0.439621	4.52e-87	2
Prex1	0.449092	7.93e-87	2
Hmox1	0.649273	8.54e-87	2
Camk1	0.497522	1.11e-86	2
Prkcd	0.481684	4.15e-86	2
Tmcc3	0.419857	9.11e-86	2
Alox5	0.3463	2.04e-85	2
Ptp4a2	0.449929	3.41e-85	2
Fgl2	0.439117	5.84e-85	2
Cd81	0.378064	2.14e-84	2
Cmtm7	0.491689	2.16e-84	2
Gabarap	0.375973	5.21e-84	2
H2-D1	0.344751	6.74e-84	2
Wnk1	0.489517	7e-84	2
Rgs2	0.469498	1.95e-83	2
P2ry12	0.388872	1.99e-83	2
Trps1	0.388127	1.14e-82	2
Itpripl2	0.409237	2.05e-82	2
Pip4k2a	0.436935	3.38e-82	2
Gna12	0.382806	7.88e-82	2
Rnf130	0.451635	5.96e-81	2
Cd63	0.517113	1.08e-80	2
Cela2a	0.468326	1.38e-80	2
Picalm	0.48187	2.16e-80	2
Rac3	0.39391	2.39e-80	2
Rap2b	0.417212	1.58e-79	2
Nfkbiz	0.525486	2.91e-79	2
Igf1	0.455152	4.01e-79	2
Cdc42	0.3531	9.83e-78	2
Cebpb	0.449067	1.32e-77	2
Tln1	0.460034	3.02e-77	2
Glul	0.384527	3.62e-77	2
Ebi3	0.346589	1.25e-76	2
Cmtm3	0.41838	2.82e-76	2
Tgfbr2	0.448408	3.49e-76	2
Dnajb14	0.441708	3.57e-76	2
Sh3glb1	0.421683	4.22e-76	2
Cndp2	0.456456	1.1e-75	2
P2rx4	0.426823	1.23e-75	2
Pitpna	0.472174	2.69e-75	2
BC005537	0.475314	4.14e-75	2
P2rx7	0.355357	6.06e-75	2
Gng2	0.432142	7.13e-75	2
Rhog	0.472217	1.65e-74	2
Ifitm2	0.366066	4.47e-74	2
Ap2a2	0.418897	6.59e-74	2
Lyl1	0.412913	2.21e-73	2
Tgfb1	0.430186	1.63e-72	2
Serpinf1	0.277326	8.35e-72	2
Il6ra	0.382828	1.15e-71	2
Pdlim4	0.375084	1.18e-71	2
Tifa	0.361163	1.38e-71	2
Ctla2b	0.352739	3.32e-71	2
Hfe	0.357752	8.61e-71	2
Fgd2	0.411543	1.17e-70	2
Abca1	0.447806	1.32e-70	2
Dok2	0.434382	1.7e-70	2
Ssh2	0.476257	1.5e-69	2
Rab8b	0.410799	1.68e-69	2
Vim	0.608662	4.93e-69	2
Rgs1	0.472979	7.97e-69	2
Gltp	0.449835	3.69e-68	2
Dusp6	0.422436	4.86e-67	2
Cd53	0.338282	1.01e-66	2
Creg1	0.570028	1.54e-66	2
Ang	0.336155	2.87e-66	2
Itsn1	0.33023	4.65e-66	2
Actr3	0.378458	5.62e-66	2
Ccdc88a	0.347233	1.81e-65	2
Ctsd	0.812394	2.13e-65	2
Erp29	0.400998	3.13e-65	2
Chp2	0.33452	5.23e-65	2
Bmp2k	0.38055	1.03e-64	2
Gns	0.410952	2.85e-64	2
Nfxl1	0.364926	4.35e-64	2
Ptprj	0.382918	1.49e-63	2
Pfn1	0.281796	2.32e-63	2
Tpp1	0.431395	4.48e-63	2
Ahnak	0.365111	1.11e-62	2
Ptpn18	0.334311	1.81e-62	2
Apbb1ip	0.393681	1.99e-62	2
Zfp36	0.495033	2.68e-62	2
Fam129a	0.383866	4.05e-62	2
Sec14l1	0.379691	5.8e-62	2
Arhgap30	0.386623	2.02e-61	2
Spred1	0.404845	1.29e-60	2
Cd72	0.404841	2.2e-60	2
Ltc4s	0.373387	4.34e-60	2
Acp2	0.35264	6.01e-60	2
Lamp2	0.374444	2.32e-59	2
Rgs18	0.320021	9.02e-59	2
Zfp36l2	0.445909	9.9e-59	2
Susd3	0.323737	1.27e-58	2
Fes	0.348757	6.67e-58	2
Fam111a	0.39367	7.16e-58	2
Daglb	0.324008	1.08e-57	2
Rhoa	0.337666	1.38e-57	2
Ifnar2	0.356941	1.42e-57	2
Cd44	0.436938	2.62e-57	2
Cdk6	0.410662	4.31e-57	2
Ptpn6	0.348157	5.51e-57	2
Ms4a6b	0.286529	5.58e-57	2
Dock8	0.371652	8.98e-57	2
Synj1	0.325354	1.23e-56	2
5031439G07Rik	0.343457	1.23e-56	2
Fam49b	0.381222	1.45e-56	2
Cd86	0.350448	1.73e-56	2
Lamtor1	0.379744	2.66e-56	2
Qk	0.380007	2.17e-55	2
Cfl1	0.267964	3.63e-55	2
Nptn	0.374051	9.56e-55	2
Cela3b	0.384217	2.53e-54	2
Cln8	0.30692	2.62e-54	2
Snx3	0.37719	2.7e-54	2
Zg16	0.391421	2.97e-54	2
Scamp2	0.380434	4e-54	2
Mbnl1	0.330989	1.09e-53	2
Dhrs3	0.382281	1.41e-53	2
Arap1	0.331884	1.43e-53	2
Ctrb1	0.333066	1.65e-53	2
Plekho2	0.33663	2.78e-53	2
Frmd4b	0.404567	4.05e-53	2
Rac1	0.326444	7.86e-53	2
Pgd	0.380658	9.45e-53	2
Hspa1a	0.498135	2.92e-52	2
Sgpl1	0.339185	5.89e-52	2
Tnfsf12	0.323361	6.12e-52	2
Tep1	0.327192	1.58e-51	2
Arhgdia	0.349979	1.61e-51	2
Eid1	0.375619	2.84e-51	2
Rab11fip5	0.281991	4.82e-51	2
Sesn1	0.365751	7.48e-51	2
Epb41l2	0.392141	7.86e-51	2
Slc9a9	0.284918	1.18e-50	2
Capzb	0.336893	3.3e-50	2
Stard8	0.324937	4.61e-50	2
Vwa5a	0.360739	6.21e-50	2
Gmfg	0.30079	1.8e-49	2
Tnfrsf1b	0.269704	2.18e-49	2
Atp13a2	0.319144	5.25e-49	2
Akr1a1	0.349953	3.11e-48	2
Lamtor4	0.380582	3.22e-48	2
Sdf2l1	0.313219	8.3e-48	2
Serpinb8	0.308427	9.67e-48	2
Ap1s2	0.310432	3.12e-47	2
Entpd1	0.262412	7.36e-47	2
Atox1	0.265122	2.07e-46	2
Vav3	0.282348	2.81e-46	2
Gdi2	0.34144	3.4e-46	2
2210010C04Rik	0.336913	3.58e-46	2
Cstb	0.605049	5.8e-46	2
Mfsd1	0.353055	8.81e-46	2
Adam15	0.292464	1.25e-45	2
Tfe3	0.311039	1.55e-45	2
Ifngr2	0.328911	1.72e-45	2
Rab31	0.300942	3.11e-45	2
Mpp1	0.320475	7.11e-45	2
Eif4ebp1	0.337092	9.35e-45	2
Fermt3	0.329939	1.05e-44	2
Skil	0.348023	2.31e-44	2
Atp6v1b2	0.344025	2.56e-44	2
Sh3bgrl	0.34041	2.99e-44	2
Plin2	0.380837	4.11e-44	2
Pepd	0.312265	4.97e-44	2
Itgb2	0.322457	5.31e-44	2
Rnf13	0.36731	5.95e-44	2
Dusp1	0.432685	6.82e-44	2
Mob1a	0.368124	7.56e-44	2
Lcp2	0.299378	2.07e-43	2
Ehbp1l1	0.297265	4e-43	2
Egr1	0.428655	7.6e-43	2
Bri3	0.368565	8.66e-43	2
Fnbp1	0.338454	1.47e-42	2
Cep170	0.306174	1.52e-42	2
Brk1	0.324351	6.39e-42	2
Fam213b	0.303678	1.21e-41	2
Cmtm6	0.307869	1.47e-41	2
Gng5	0.268448	2.79e-41	2
Dst	0.266972	6.04e-41	2
Taok3	0.38236	8.56e-41	2
Eps15	0.303449	3.27e-40	2
Arpc4	0.335128	4.53e-40	2
Uap1l1	0.312249	5.51e-40	2
Plxnb2	0.336423	7.76e-40	2
Lpar6	0.323506	1.04e-39	2
Rp2	0.294787	1.19e-39	2
Myo9b	0.275396	1.56e-39	2
Cpa1	0.321663	3.1e-39	2
Tpm3	0.292579	3.46e-39	2
Reg1	0.308369	9.16e-39	2
Atp6v0a1	0.299553	1.03e-38	2
Lpxn	0.285561	1.19e-38	2
Ogfrl1	0.28061	2.95e-38	2
9930111J21Rik2	0.269773	4.44e-38	2
Flna	0.39096	1.15e-37	2
Mapkapk2	0.307085	1.52e-37	2
AU020206	0.29742	1.61e-37	2
Txnip	0.280522	1.79e-37	2
Stx7	0.32577	3.09e-37	2
Arpc5	0.282092	3.22e-37	2
Myadm	0.319747	4.65e-37	2
Eps8	0.269065	6.43e-37	2
St3gal6	0.345714	7.01e-37	2
Bach1	0.28381	8.41e-37	2
Fgd4	0.290037	8.58e-37	2
Pnlip	0.329108	1.13e-36	2
Ncf4	0.271704	1.41e-36	2
Pik3cg	0.265373	1.97e-36	2
Ier5	0.34189	2.08e-36	2
Zswim6	0.267305	5.37e-36	2
Ccdc50	0.321759	5.92e-36	2
Sash1	0.261336	6.01e-36	2
Crlf2	0.309671	7.8e-36	2
Arhgap17	0.296536	2.99e-35	2
Prkcb	0.274182	3.04e-35	2
Fam174a	0.340897	4.83e-35	2
Pnp	0.323002	6.4e-35	2
Fmnl1	0.284082	1.21e-34	2
Mapk14	0.297381	1.39e-34	2
Hps3	0.285612	1.69e-34	2
Coro1c	0.296301	2.03e-34	2
Snx20	0.268238	2.05e-34	2
Ly96	0.252927	5.53e-34	2
Actr2	0.315341	7.71e-34	2
Tmem141	0.262305	1.3e-33	2
Sap30	0.276929	1.98e-33	2
Ifnar1	0.280892	2.07e-33	2
Acer3	0.28429	3.07e-33	2
Dennd1a	0.278842	6.73e-33	2
Itm2c	0.282429	9.96e-33	2
Slc43a2	0.301322	1.99e-32	2
Lgals3bp	0.332428	3.36e-32	2
Sla	0.251527	3.67e-32	2
Ppp1r18	0.274429	6.49e-32	2
Dennd5a	0.262143	1.68e-31	2
Gngt2	0.254151	2.33e-31	2
Cela1	0.289424	2.51e-31	2
Rnpep	0.292977	5.74e-31	2
Neurl3	0.285001	7.87e-31	2
Grb2	0.29776	1.31e-30	2
Mtmr6	0.268536	1.9e-30	2
Stard3nl	0.296426	2.1e-30	2
Ppp1r21	0.287633	2.52e-30	2
Tmem261	0.304715	5.37e-30	2
Oasl2	0.262869	1.17e-29	2
Snap23	0.282305	2.02e-29	2
Tacc1	0.270311	2.53e-29	2
Jmjd1c	0.299336	2.56e-29	2
Rnase1	0.300947	5.63e-29	2
Pcyt1a	0.261303	6.89e-29	2
2020-03-01	0.259042	1.16e-28	2
D1Ertd622e	0.255002	1.44e-28	2
Cap1	0.282549	1.77e-28	2
Rps6ka1	0.264581	1.81e-28	2
Iqgap1	0.305989	1.86e-28	2
Ralb	0.265161	2.01e-28	2
Vav1	0.257803	2.35e-28	2
St8sia4	0.269373	2.53e-28	2
Adgre5	0.359574	4.8e-28	2
Jun	0.326183	5.48e-28	2
Atp6ap1	0.269636	1.17e-27	2
Prss2	0.283904	1.39e-27	2
Btg2	0.381916	2.28e-27	2
Cfp	0.2682	3.13e-27	2
Bin1	0.268813	3.69e-27	2
2610507B11Rik	0.279136	4.92e-27	2
Fuca1	0.301582	6.12e-27	2
Sycn	0.301445	1.08e-26	2
Elmo1	0.2766	1.89e-26	2
Pdcd2l	0.264102	3.11e-26	2
Celf2	0.277068	3.22e-26	2
Pak1	0.265133	3.24e-26	2
Adrb2	0.251619	4.06e-26	2
Tsc22d3	0.275396	6.38e-26	2
Necap2	0.279784	6.63e-26	2
Diaph2	0.255139	1.27e-25	2
Sgpp1	0.252845	1.5e-25	2
Ptpra	0.278021	1.55e-25	2
Fnip1	0.250994	1.91e-25	2
Junb	0.3	2.08e-24	2
Rnf149	0.269258	4.75e-24	2
Rap1gds1	0.250036	7.13e-24	2
Ncoa3	0.255881	7.96e-24	2
Dram2	0.260393	9.24e-24	2
Smagp	0.263317	1.81e-23	2
Tmem55b	0.253497	1.92e-23	2
Arhgef6	0.257851	5.51e-22	2
[truncated: 8,720 more rows]
