# Supplementary material for: Single-cell transcriptome analysis defines heterogeneity of the murine pancreatic ductal tree
Source: eLife. 2021 May 19;10:e67776. doi: 10.7554/eLife.67776 (PMC8184217; doi:10.7554/eLife.67776)
Supplement: Figure 2—figure supplement 3—source data 1. [file elife-67776-fig2-figsupp3-data1.xlsx]

## Sheet: DBA+ duct cluster 3 vs 4
gene	avg_logFC	p_val_adj
Fam183b	2.5097	5.44e-42
Tppp3	2.57995	3.68e-41
Fxyd3	-1.45465	2.53e-37
Anxa3	-1.79557	1.41e-36
Anxa5	-1.05981	1.16e-35
Foxj1	1.84379	1.71e-34
Srsf10	1.6602	6.79e-32
Myl12a	-0.978327	2.34e-31
Tubb4b	1.38849	2.05e-30
Cxcl16	-1.22758	2.66e-30
Ambp	1.13838	6.7e-29
Chchd10	1.40201	3.68e-28
Adam33	-1.12472	4.61e-28
Dynlrb2	1.48769	5.53e-28
1700016K19Rik	1.45045	9.32e-28
Cryab	-1.06704	2.94e-27
Smim5	1.37149	4.51e-27
Ddah2	-1.14086	1.24e-26
Tmsb10	-0.950579	1.3e-26
Tmsb4x	-0.824771	2.34e-26
Cdkn1a	1.55837	2.07e-25
Fam213a	1.20087	2.71e-25
Cfap44	1.30785	8.56e-25
Lurap1l	-0.992426	9.02e-25
Cyp2s1	1.60654	1.56e-24
Bambi	1.56787	1.62e-24
Trf	1.40825	1.43e-23
Actg1	-0.643134	1.73e-23
Ttr	1.23806	1.21e-21
Pdxk	1.3403	1.42e-21
Clu	-0.670155	2e-21
Krt7	-0.909034	4.02e-21
Igf1	-0.905334	1.01e-20
1700007K13Rik	1.26158	1.13e-20
Myl6	-0.51744	1.6e-20
S100a11	-0.591473	1.68e-20
Timp4	1.1918	1.02e-19
BC051019	1.13891	1.14e-19
Tgfb3	-0.851675	1.83e-19
Mfge8	-1.08654	6.26e-19
Rsph4a	1.11545	7.58e-19
Calm1	0.745407	1.32e-18
Ptp4a1	-0.86833	3.87e-18
Aldoa	0.747441	6.34e-18
Vpreb3	1.19851	7.71e-18
Mns1	1.22471	8.32e-18
S100a10	-0.767468	9.62e-18
Ly6e	-0.591764	1.08e-17
Cd2ap	-0.8833	1.77e-17
Efhd2	-0.841476	1.98e-17
Odf3b	1.05607	2.17e-17
Enkur	1.02463	3.57e-17
Krt18	-0.665267	3.64e-17
Dbi	-0.532062	4.65e-17
Rsph9	0.942991	4.9e-17
Calml4	1.05357	7.95e-17
Ttll3	1.0279	1.18e-16
Rpl23a	-0.437137	1.73e-16
Tuba1a	0.983557	2.28e-16
Elof1	1.03916	2.45e-16
Tmem176b	-0.615195	2.81e-16
4933434E20Rik	1.20684	3.62e-16
Pdzk1ip1	-0.802635	6.16e-16
Tnfrsf12a	-1.06622	6.56e-16
1110017D15Rik	1.30352	1.27e-15
Ankrd1	-1.4278	3.4e-15
Muc1	-0.797836	5.67e-15
Atp1a1	0.697597	1.1e-14
Spag6l	0.88673	1.98e-14
Nudt4	0.979128	2.09e-14
Eef1a1	-0.356272	2.87e-14
Tsc22d3	-0.790518	5.3e-14
Sparc	-0.721853	5.92e-14
Cfap126	0.97583	6.53e-14
3300002A11Rik	0.973912	8.81e-14
Shisa4	-0.677609	1.03e-13
Igfbp5	1.08431	1.09e-13
Tgfb2	-0.876819	2.67e-13
Mt1	1.3704	3.17e-13
Meig1	0.981218	3.31e-13
Hipk1	0.947488	3.51e-13
Ahnak	-0.854252	5.07e-13
Cdc42ep5	-0.583507	5.71e-13
Rpl10	-0.394306	6.02e-13
Sema3c	-0.7686	6.92e-13
Timp3	-0.814995	7.07e-13
Sh2d4a	-0.666212	7.92e-13
Rps29	-0.256511	8.89e-13
Rsph1	1.0079	9.21e-13
Cldn4	-0.655786	1.17e-12
Efemp1	-0.591607	1.26e-12
Igfbp7	-0.561614	1.61e-12
Dnah9	0.918571	1.95e-12
Dclk1	-0.63651	2.18e-12
Gm29538	0.876878	2.85e-12
Fam166b	0.867315	2.9e-12
Wfdc2	-0.627758	3.7e-12
Tmem176a	-0.596209	4.07e-12
Samd9l	-0.703445	4.39e-12
Tekt1	0.843817	4.46e-12
Cd81	-0.531812	4.58e-12
Nudt19	-0.678505	4.98e-12
Ptgfr	-0.514556	5.15e-12
Riiad1	1.02181	7.97e-12
Ccdc39	0.867834	7.98e-12
Mapk15	0.852346	9.46e-12
Tmem212	1.31718	1.03e-11
Aebp1	0.973663	1.18e-11
Tpt1	-0.311844	1.21e-11
Cfap54	0.878724	1.53e-11
Tm4sf1	1.02915	1.67e-11
Nudc	0.627252	2.69e-11
Wdr66	0.971931	2.96e-11
Myl12b	-0.587812	4.71e-11
Dynll1	0.752677	5.8e-11
Spef2	0.899549	6.01e-11
Itm2b	0.390278	7.09e-11
Efcab10	0.813972	8.15e-11
Aldh1a1	-0.591101	8.56e-11
Cttnbp2	-0.549214	1.36e-10
Smim6	0.870868	2.1e-10
Cyba	-0.63052	2.2e-10
1700088E04Rik	0.933309	2.62e-10
Drc7	0.702021	2.73e-10
Ctsh	0.678776	2.79e-10
Agr3	0.913984	4.16e-10
Pifo	0.780622	4.25e-10
Sftpd	-0.520595	5.89e-10
Sdc4	-0.689849	6.09e-10
Epcam	-0.468411	6.34e-10
Kcnq1ot1	0.982354	6.84e-10
Rps4x	-0.36248	6.9e-10
Lrrc23	0.704097	7.11e-10
Cldn6	-0.644835	8.28e-10
Pamr1	-0.553628	1.64e-09
Cfap45	0.791139	1.65e-09
Rpl10a	-0.361708	1.84e-09
Zfp36l1	-0.637657	1.96e-09
Iqca	0.744001	2.06e-09
Dnali1	0.819305	2.08e-09
Klf6	-0.568813	2.15e-09
Gstm1	0.669697	2.32e-09
Acsl3	0.846863	2.43e-09
Syt7	-0.483885	2.66e-09
Slco3a1	-0.569248	2.78e-09
1700026L06Rik	0.704998	3.28e-09
mt-Nd2	0.370407	3.43e-09
Cep126	0.892212	3.88e-09
Rps20	-0.346251	3.98e-09
H2-D1	-0.637599	3.99e-09
Rpl4	-0.383476	4.33e-09
Rassf3	-0.576216	4.85e-09
Dnah6	0.744673	5.88e-09
1700001C02Rik	0.703699	5.88e-09
Tmem107	0.786655	6.07e-09
Tubb2a	-0.586572	6.21e-09
Tubb5	-0.63697	6.67e-09
Scx	-0.459613	6.78e-09
Rpl3	-0.412409	6.9e-09
Bphl	0.776824	8.32e-09
Snhg18	-0.550643	1.07e-08
Kif9	0.744409	1.41e-08
Tctex1d4	0.729112	1.41e-08
Timp2	-0.556743	1.57e-08
Rhou	-0.563752	1.7e-08
Ppil6	0.771666	2.21e-08
Lrrc51	0.696643	2.23e-08
Tm4sf4	0.494441	2.56e-08
Krt19	-0.646588	2.73e-08
Rps9	-0.308369	2.94e-08
Nfkbia	-0.708905	3.18e-08
Bcam	-0.600142	3.61e-08
St3gal4	-0.661688	4.03e-08
C2cd4b	0.891467	4.33e-08
Birc3	-0.435883	4.56e-08
Tesc	-0.568756	4.62e-08
Rpl39	-0.286045	4.76e-08
Fstl1	-0.592276	5.59e-08
Pih1d2	0.711756	5.7e-08
Csf1	-0.476217	6.18e-08
Dnajb13	0.712356	6.81e-08
Cnn3	-0.564644	8.41e-08
Cdc14a	0.797222	9.11e-08
Tinagl1	-0.591514	9.36e-08
Rps28	-0.313211	1.02e-07
Akap9	0.596034	1.05e-07
Nek1	0.764026	1.06e-07
App	-0.520849	1.16e-07
F3	-0.508542	1.18e-07
Rps2	-0.370736	1.3e-07
Pdlim4	-0.570572	1.33e-07
Dalrd3	0.776644	1.36e-07
Gsn	-0.402608	1.39e-07
Cspp1	0.711682	1.54e-07
Rps15a	-0.322483	1.56e-07
Txn1	0.492943	1.62e-07
Pdpn	-0.404902	1.8e-07
Fam216b	0.660855	2.1e-07
Cp	-0.408466	2.27e-07
Cxadr	-0.561823	2.33e-07
Ccdc30	0.759341	2.35e-07
Cldn7	-0.45149	3.11e-07
Cfap53	0.650237	3.5e-07
Rhoc	-0.528243	3.53e-07
Cfap77	0.652604	3.64e-07
Lrriq1	0.744953	3.64e-07
Cd14	-0.556375	3.88e-07
Bex4	-0.558943	4.14e-07
Rpl22	-0.346321	4.9e-07
Rhob	-0.585816	5.32e-07
Rpl15	-0.396352	5.36e-07
1110004E09Rik	0.767335	5.59e-07
Uox	0.60642	5.76e-07
Spp1	-0.304251	6.7e-07
Csrp2	-0.484838	7.18e-07
Aadac	0.778114	9.35e-07
Chuk	0.729586	9.78e-07
Pkhd1	-0.496522	1.03e-06
Pvrl2	-0.494277	1.05e-06
Relb	-0.521804	1.08e-06
Arl6ip5	-0.522297	1.1e-06
Cfap43	0.684333	1.14e-06
Nme5	0.76459	1.18e-06
Stmn1	-0.578362	1.38e-06
Rpl14	-0.263605	1.39e-06
Ifi27	-0.525099	1.55e-06
2410004P03Rik	0.735279	1.68e-06
Junb	-0.607142	2.08e-06
Marcksl1	-0.554042	2.26e-06
Flrt2	-0.452527	2.33e-06
Cmtm8	0.76562	2.42e-06
Sfxn2	0.669045	2.45e-06
Lrrc36	0.632287	2.46e-06
Mcee	0.625788	2.81e-06
Ttll6	0.592969	3.01e-06
Cfap69	0.587977	3.55e-06
Mlf1	0.671873	3.92e-06
Ankrd65	0.54977	3.99e-06
Wdr63	0.548624	3.99e-06
Erich3	0.622331	4.14e-06
Cpm	0.642073	4.21e-06
2200002D01Rik	-0.592161	4.48e-06
Hspa2	0.692429	4.53e-06
Glipr2	-0.419367	4.57e-06
Rps7	-0.301685	4.7e-06
Rps12	-0.300424	4.92e-06
Cetn4	0.684237	4.96e-06
Dnah5	0.560665	5.38e-06
Rps24	-0.251396	5.7e-06
Cd63	-0.41413	5.92e-06
Clmn	0.561812	6.44e-06
Ccdc40	0.563179	6.45e-06
Apobec3	-0.579798	6.49e-06
Actb	-0.508752	6.86e-06
Ctsl	-0.506008	7.28e-06
Cfap206	0.661221	9.37e-06
Armc4	0.484327	1.04e-05
Iqcg	0.696763	1.11e-05
Rps11	-0.280224	1.18e-05
Cyr61	-0.626356	1.21e-05
Usp2	0.679537	1.25e-05
Gstt1	-0.495866	1.32e-05
Rpl7	-0.264934	1.33e-05
Hspg2	-0.420052	1.35e-05
Zfos1	-0.46862	1.39e-05
Prelp	0.659985	1.66e-05
Ccdc189	0.593613	1.69e-05
Rpl27a	-0.256199	1.7e-05
Clic6	0.631596	2.05e-05
Rras	-0.388436	2.06e-05
Dapk1	0.718187	2.15e-05
Rpl8	-0.2618	2.22e-05
Enpp2	0.671759	2.35e-05
Ankrd44	0.803063	2.63e-05
Spag16	0.483257	2.68e-05
Eno4	0.523643	2.81e-05
Ppia	-0.278152	2.91e-05
Ngf	-0.397164	2.93e-05
Rps21	-0.252885	3.01e-05
Pdgfd	-0.368907	3.04e-05
Wdr78	0.692931	3.13e-05
S100a16	-0.450228	3.23e-05
Rps5	-0.264702	3.3e-05
Bicc1	-0.391774	3.49e-05
Dync2h1	0.592851	3.49e-05
Myh14	-0.400497	4.01e-05
Trp53	-0.439801	4.41e-05
Pfkp	-0.322677	4.52e-05
Mt2	1.22851	5.19e-05
H2-Q4	-0.441174	5.49e-05
Gclc	0.660492	5.98e-05
Myh10	-0.486622	6.01e-05
Emc6	0.654685	6.16e-05
Ier3	-0.530587	6.53e-05
Prr29	0.523707	7.07e-05
Npm1	-0.35827	7.08e-05
H2-T23	-0.366708	8.19e-05
Fam107b	-0.499236	8.27e-05
Rps26	-0.349063	8.31e-05
Endog	0.585097	8.65e-05
Crip2	0.458545	8.97e-05
Ptges3	0.531558	8.99e-05
Rpsa	-0.335687	9.61e-05
Rplp0	-0.306839	9.89e-05
Drc1	0.557129	0.00010035
Bcl10	-0.330773	0.000102514
Rab36	0.581081	0.000103288
Fmo2	-0.572822	0.000106011
Ly6c1	1.18536	0.000122136
Fhad1	0.612531	0.000123285
Wsb1	-0.392398	0.000127366
Capsl	0.727429	0.000128902
Zmynd10	0.531466	0.000139592
Samd4	-0.37835	0.000153365
St3gal6	0.629363	0.000156524
Slc35f5	-0.394731	0.000157109
Rfx3	0.65146	0.000162161
Hebp2	-0.39686	0.00017394
Slc39a4	0.70138	0.000175915
Nme1	-0.436355	0.000181648
Tubb2b	-0.301386	0.000181821
Mak	0.560203	0.000196168
Tob1	0.683508	0.000198535
Vat1	-0.341237	0.000203606
D630024D03Rik	0.597233	0.000205896
Ugt2b35	0.548686	0.0002092
Iqub	0.57791	0.000219267
Rps6	-0.299274	0.000221576
Nhsl1	-0.392551	0.00022397
mt-Nd4	0.270069	0.000227637
Prdx2	-0.41735	0.000245858
Ankrd37	0.547702	0.000247729
Epn3	-0.308281	0.000248698
Cldn2	0.616003	0.000256049
Fkbp3	-0.376696	0.000284644
Myof	-0.478409	0.000299468
Hpcal1	-0.382364	0.000303056
Rpl6	-0.252999	0.000304925
Acad9	-0.317222	0.000315035
Edn1	-0.499737	0.000315067
Cdh4	0.525671	0.0003461
Uckl1os	0.508167	0.0003461
Nfe2l3	-0.256329	0.000362835
Cfap70	0.484088	0.000369976
Lasp1	-0.472411	0.000390136
Tmod1	-0.351347	0.000415314
Echdc2	-0.426713	0.000416706
Eef1b2	-0.353769	0.000420917
Itga3	-0.399582	0.000434337
Serf2	-0.310416	0.000445493
Traf3ip1	0.612312	0.000459255
Ywhaq	-0.403576	0.000479311
Anxa11	0.619152	0.000508306
Arpc1b	-0.441902	0.000519913
Fsd1l	0.517475	0.000532206
Serpinb6b	-0.344852	0.000566122
Ddit4l	0.542999	0.00058592
Cep83	0.589104	0.000592478
Rpl5	-0.299155	0.000613165
Sphk1	-0.386236	0.000667705
Dnah11	0.681115	0.00067925
Ccdc157	0.519743	0.0007524
Gm609	0.516145	0.000805866
Rabgap1l	0.591376	0.000871611
Bcl7c	-0.320622	0.000921231
Chmp4c	-0.381127	0.000950301
Oasl2	-0.36036	0.000953971
Ppp1r14b	-0.401565	0.000983677
S100a13	-0.433253	0.00104028
Dnajb4	-0.406396	0.00104297
Plpp2	-0.36872	0.00105993
Plscr3	-0.40349	0.00109829
Ttc25	0.51765	0.00109855
Rab27b	-0.478035	0.0011602
Frmd6	-0.325556	0.0011894
Dnah7b	0.587217	0.00120877
Ywhah	-0.388769	0.00121631
Ttc30b	0.614775	0.00127563
Slc35e3	0.527651	0.00131188
Aldh3b1	0.528446	0.00134399
Hspa4l	0.590845	0.00135104
Mycbp	0.624841	0.00137429
Syne1	0.564196	0.0014387
Cpne8	-0.369572	0.00146187
Aimp2	-0.296798	0.00154587
Sox4	-0.397606	0.00158066
Man1a	0.535363	0.0017089
Crip1	0.59331	0.00179472
Ppib	-0.348432	0.00182234
Mrpl13	-0.317249	0.00189147
Tapbp	-0.362226	0.00207805
Chd3	-0.377268	0.00211903
Mbd3	-0.341248	0.0021488
Serpinb9	-0.382145	0.00222907
Pvr	-0.316204	0.00252011
Isg15	-0.684596	0.00255288
Erp29	-0.387956	0.00256347
Birc2	-0.396843	0.00271665
Nek5	0.565467	0.00278205
Kif12	-0.374946	0.00303868
Ccdc34	0.467253	0.00321609
Agrn	-0.364978	0.00322061
Dusp6	0.661267	0.00336683
Slc5a1	-0.422478	0.00337849
Eif3h	-0.391533	0.00366033
Chrnb1	-0.358143	0.00379882
Sirpa	-0.377597	0.00382941
Rpl12	-0.281227	0.00413789
Casp12	-0.38136	0.00417567
Diras2	0.444578	0.00419308
Gsto1	0.497017	0.00428283
Jund	-0.38683	0.00443337
Cdc42ep1	-0.402175	0.00457205
Mrpl33	-0.426259	0.00466954
Pde4d	0.465151	0.00473017
Comt	-0.390537	0.00489332
Txndc17	-0.341787	0.00499041
Cd47	-0.476876	0.00573619
Saxo2	0.584635	0.00586935
Nfkb2	-0.314746	0.00658892
Stbd1	-0.385299	0.00681547
Capns1	-0.384204	0.00703534
Rps27l	0.329667	0.00718575
Pak3	-0.283786	0.00783071
Tns3	-0.354164	0.00784162
H2-K1	-0.474604	0.0080498
Dad1	0.434672	0.00811334
Krt23	-0.440342	0.00829509
Spry1	-0.289993	0.00905495
Rap1gap	-0.310307	0.00911529
Foxa2	0.449598	0.00927679
Col27a1	-0.289992	0.00945623
Tuft1	-0.402842	0.00947719
Rabl2	0.477218	0.00987761
Cyb5a	-0.344342	0.010124
Wasf2	-0.340275	0.0101887
Bsg	-0.306363	0.0104081
Ift74	0.554926	0.0104336
Ldha	-0.362001	0.0109267
B4galnt1	-0.306939	0.0113264
Oscp1	0.507435	0.0117261
Mlph	-0.344422	0.0118339
Rcn1	-0.254283	0.0119877
Gpm6b	-0.36125	0.012071
Creb5	-0.334497	0.0121951
Calm2	-0.25476	0.012218
Cep290	0.531511	0.0125936
Uqcr10	-0.309797	0.0134151
Capg	-0.294472	0.0140159
Snx10	-0.311292	0.0143083
Aars	-0.337048	0.0146623
Cry2	0.521564	0.0150261
Ift46	0.509356	0.0151648
Klc3	-0.316702	0.0151648
Psme2	-0.374149	0.0153172
Cldn10	-0.382643	0.0154476
Cd9	-0.250071	0.0166018
Tapbpl	-0.292989	0.0181417
Arpc5	-0.377317	0.0185908
Ift122	0.473305	0.0195352
Phb	-0.304015	0.0196466
1700013F07Rik	0.484057	0.0197806
Ubxn10	0.496745	0.020159
Jun	-0.395765	0.0206271
Sorbs2	-0.289813	0.0210234
Efcab2	0.537736	0.0215368
Gsta3	-0.37935	0.0216863
Pah	-0.329636	0.0218303
Hspb1	-0.514241	0.0227509
Prdx5	0.448406	0.0231166
Lgals1	-0.475743	0.0232973
Ehf	-0.392174	0.024009
Ccbl1	0.440319	0.0250007
Iqgap2	0.542952	0.0253103
Cldnd1	-0.302579	0.0262724
Errfi1	-0.325872	0.0273558
Cox7a2l	-0.30625	0.0275753
Tnip1	-0.25528	0.027907
Uba52	-0.283383	0.0288893
Gpx1	-0.364907	0.030495
Rala	-0.309342	0.0305624
Nfat5	-0.299977	0.0308713
Gstm2	-0.325496	0.0316436
Stap2	-0.295641	0.0316613
Znhit1	0.485687	0.0324246
Ier3ip1	-0.32733	0.0329712
Cd151	-0.295956	0.0330387
Snhg12	-0.304255	0.0335136
Cttn	-0.292262	0.0335505
Morn2	0.458948	0.0341983
Me1	-0.299864	0.0346033
Ift81	0.529535	0.0346645
Snx7	-0.294644	0.0377496
Car8	-0.282497	0.0383695
2410089E03Rik	0.48163	0.038641
Rab32	-0.25467	0.0409122
Rpl23a-ps3	-0.33227	0.04335
Calm3	0.370871	0.0433784
Efhb	0.502608	0.0434663
Ctxn1	0.575565	0.0443789
Gnb2l1	-0.267644	0.0451554
Pkm	-0.271958	0.0458223
Csrp1	-0.410126	0.0496722
