# Supplementary material for: Single-cell transcriptome analysis defines heterogeneity of the murine pancreatic ductal tree
Source: eLife. 2021 May 19;10:e67776. doi: 10.7554/eLife.67776 (PMC8184217; doi:10.7554/eLife.67776)
Supplement: Figure 2—figure supplement 3—source data 2. [file elife-67776-fig2-figsupp3-data2.xls]

## Sheet: DBA+ duct cluster 3 vs 4
© 2000-2020 QIAGEN. All rights reserved.
Ingenuity Canonical Pathways	-log(p-value)	Ratio	z-score	Molecules
EIF2 Signaling	21.1	0.161	-4.243	ACTB,EIF3H,RALA,RPL10,RPL10A,RPL12,RPL14,RPL15,RPL22,RPL27A,RPL3,RPL39,RPL4,RPL5,RPL6,RPL7,RPL8,RPLP0,RPS11,RPS12,RPS15A,RPS2,RPS20,RPS21,RPS24,RPS26,RPS27L,RPS28,RPS29,RPS4Y1,RPS5,RPS6,RPS7,RPS9,RPSA,RRAS
Coronavirus Pathogenesis Pathway	14.2	0.16	2.449	CHUK,EEF1A1,JUN,NFKB2,NFKBIA,NPM1,RPS11,RPS12,RPS15A,RPS2,RPS20,RPS21,RPS24,RPS26,RPS27L,RPS28,RPS29,RPS4Y1,RPS5,RPS6,RPS7,RPS9,RPSA,TP53
Regulation of eIF4 and p70S6K Signaling	11	0.134	-2	EIF3H,ITGA3,RALA,RPS11,RPS12,RPS15A,RPS2,RPS20,RPS21,RPS24,RPS26,RPS27L,RPS28,RPS29,RPS4Y1,RPS5,RPS6,RPS7,RPS9,RPSA,RRAS
mTOR Signaling	10.1	0.11	-2.449	EIF3H,RALA,RHOB,RHOC,RHOU,RPS11,RPS12,RPS15A,RPS2,RPS20,RPS21,RPS24,RPS26,RPS27L,RPS28,RPS29,RPS4Y1,RPS5,RPS6,RPS7,RPS9,RPSA,RRAS
Germ Cell-Sertoli Cell Junction Signaling	7.79	0.105	#NUM!	ACTB,ACTG1,EPN3,GSN,ITGA3,PAK3,RALA,RHOB,RHOC,RHOU,RRAS,TGFB2,TGFB3,TUBA1A,TUBB,TUBB2A,TUBB2B,TUBB4B
Sertoli Cell-Sertoli Cell Junction Signaling	7.25	0.0973	#NUM!	ACTB,ACTG1,CLDN10,CLDN2,CLDN4,CLDN6,CLDN7,EPN3,ITGA3,JUN,RALA,RRAS,TGFB3,TUBA1A,TUBB,TUBB2A,TUBB2B,TUBB4B
Epithelial Adherens Junction Signaling	6.99	0.105	#NUM!	ACTB,ACTG1,ARPC1B,ARPC5,EPN3,MYH10,MYH14,MYL6,RALA,RRAS,TGFB2,TUBA1A,TUBB,TUBB2A,TUBB2B,TUBB4B
Remodeling of Epithelial Adherens Junctions	6.89	0.162	#NUM!	ACTB,ACTG1,ARPC1B,ARPC5,NME1,RALA,TUBA1A,TUBB,TUBB2A,TUBB2B,TUBB4B
Regulation of IL-2 Expression in Activated and Anergic T Lymphocytes	6.56	0.135	#NUM!	BCL10,Calm1 (includes others),CHUK,JUN,NFAT5,NFKB2,NFKBIA,RALA,RRAS,TGFB2,TGFB3,TOB1
NRF2-mediated Oxidative Stress Response	6.39	0.0899	-1.667	ACTB,ACTG1,DNAJB13,DNAJB4,ERP29,GCLC,GSTA3,GSTM1,GSTM5,GSTO1,JUN,JUNB,JUND,PPIB,RALA,RRAS,TXN
Regulation of Actin-based Motility by Rho	6.29	0.128	-3.317	ACTB,ARPC1B,ARPC5,GSN,ITGA3,MYL12A,MYL12B,MYL6,PAK3,RHOB,RHOC,RHOU
Actin Cytoskeleton Signaling	6.18	0.0826	-3.5	ACTB,ACTG1,ARPC1B,ARPC5,CD14,GSN,IQGAP2,ITGA3,MYH10,MYH14,MYL12A,MYL12B,MYL6,PAK3,PDGFD,RALA,RRAS,WASF2
Aryl Hydrocarbon Receptor Signaling	5.81	0.0979	-0.378	ALDH1A1,ALDH3B1,CDKN1A,GSTA3,GSTM1,GSTM5,GSTO1,HSPB1,JUN,NFKB2,PTGES3,TGFB2,TGFB3,TP53
Hepatic Fibrosis / Hepatic Stellate Cell Activation	5.79	0.086	#NUM!	BAMBI,CD14,COL27A1,CSF1,EDN1,IGF1,IGFBP5,KLF6,MYH10,MYH14,MYL6,NFKB2,PDGFD,TGFB2,TGFB3,TIMP2
Phagosome Maturation	5.53	0.0927	#NUM!	CTSH,CTSV,DYNC2H1,DYNLL1,DYNLRB2,HLA-A,HLA-E,PRDX2,PRDX5,TUBA1A,TUBB,TUBB2A,TUBB2B,TUBB4B
Signaling by Rho Family GTPases	5.48	0.0738	-3.3	ACTB,ACTG1,ARPC1B,ARPC5,CDC42EP1,CDC42EP5,CDH4,ITGA3,JUN,MYL12A,MYL12B,MYL6,NFKB2,PAK3,RHOB,RHOC,RHOU,STMN1
Hepatic Fibrosis Signaling Pathway	5.06	0.0598	-2.558	BAMBI,Calm1 (includes others),CHUK,CREB5,EDN1,ITGA3,JUN,MYL12A,MYL12B,MYL6,NFKB2,NFKBIA,PDGFD,RALA,RHOB,RHOC,RHOU,RRAS,SPP1,TF,TGFB2,TGFB3
Integrin Signaling	5.03	0.0751	-3.873	ACTB,ACTG1,ARPC1B,ARPC5,CAPNS1,CTTN,GSN,ITGA3,MYL12A,MYL12B,PAK3,RALA,RHOB,RHOC,RHOU,RRAS
Tight Junction Signaling	4.99	0.0833	#NUM!	ACTB,ACTG1,CLDN10,CLDN2,CLDN4,CLDN6,CLDN7,JUN,MYH10,MYH14,MYL6,NFKB2,TGFB2,TGFB3
Leukocyte Extravasation Signaling	4.83	0.0761	-1	ACTB,ACTG1,CLDN10,CLDN2,CLDN4,CLDN6,CLDN7,CTTN,CYBA,ITGA3,MYL6,RAP1GAP,TIMP2,TIMP3,TIMP4
RhoGDI Signaling	4.65	0.0778	3.207	ACTB,ACTG1,ARPC1B,ARPC5,CDH4,ITGA3,MYL12A,MYL12B,MYL6,PAK3,RHOB,RHOC,RHOU,WASF2
TNFR2 Signaling	4.55	0.2	0	BIRC2,BIRC3,CHUK,JUN,NFKB2,NFKBIA
Agrin Interactions at Neuromuscular Junction	4.5	0.115	-3	ACTB,ACTG1,AGRN,CTTN,ITGA3,JUN,PAK3,RALA,RRAS
Apoptosis Signaling	4.43	0.101	0.632	BIRC2,BIRC3,CAPNS1,CHUK,ENDOG,NFKB2,NFKBIA,RALA,RRAS,TP53
FAT10 Cancer Signaling Pathway	4.4	0.152	-1.134	CHUK,EEF1A1,NFKB2,NFKBIA,TGFB2,TGFB3,TP53
Cdc42 Signaling	4.36	0.0778	-2.714	ARPC1B,ARPC5,CDC42EP5,HLA-A,HLA-E,IQGAP2,ITGA3,JUN,MYL12A,MYL12B,MYL6,PAK3,RALA
TNFR1 Signaling	4.16	0.14	-0.378	BIRC2,BIRC3,CHUK,JUN,NFKB2,NFKBIA,PAK3
TWEAK Signaling	4.15	0.171	0.816	BIRC2,BIRC3,CHUK,NFKB2,NFKBIA,TNFRSF12A
Actin Nucleation by ARP-WASP Complex	3.95	0.111	-2.828	ARPC1B,ARPC5,ITGA3,RALA,RHOB,RHOC,RHOU,RRAS
Glioma Invasiveness Signaling	3.86	0.108	-1.414	RALA,RHOB,RHOC,RHOU,RRAS,TIMP2,TIMP3,TIMP4
ILK Signaling	3.79	0.0684	-3.606	ACTB,ACTG1,CREB5,JUN,KRT18,MYH10,MYH14,MYL6,NFKB2,PPP1R14B,RHOB,RHOC,RHOU
CD28 Signaling in T Helper Cells	3.73	0.0833	-1.414	ARPC1B,ARPC5,BCL10,Calm1 (includes others),CHUK,HLA-A,JUN,NFAT5,NFKB2,NFKBIA
Agranulocyte Adhesion and Diapedesis	3.72	0.0674	#NUM!	ACTB,ACTG1,CLDN10,CLDN2,CLDN4,CLDN6,CLDN7,CXCL16,ITGA3,MYH10,MYH14,MYL6,SDC4
Glucocorticoid Receptor Signaling	3.65	0.0536	#NUM!	ACTB,CDKN1A,CHUK,HSPA2,JUN,KRT18,KRT19,KRT23,KRT7,NFAT5,NFKBIA,PTGES3,RALA,RRAS,TGFB2,TGFB3,TSC22D3,YWHAH
RhoA Signaling	3.64	0.0813	-3.162	ACTB,ACTG1,ARPC1B,ARPC5,CDC42EP1,CDC42EP5,IGF1,MYL12A,MYL12B,MYL6
PEDF Signaling	3.55	0.0976	-1.89	CHUK,NFKB2,NFKBIA,NGF,RALA,RRAS,TP53,WASF2
14-3-3-mediated Signaling	3.53	0.0787	-2.236	JUN,RALA,RRAS,TUBA1A,TUBB,TUBB2A,TUBB2B,TUBB4B,YWHAH,YWHAQ
iNOS Signaling	3.52	0.133	-1.342	Calm1 (includes others),CD14,CHUK,JUN,NFKB2,NFKBIA
T Cell Receptor Signaling	3.5	0.0857	#NUM!	BCL10,Calm1 (includes others),CHUK,JUN,NFAT5,NFKB2,NFKBIA,RALA,RRAS
HIF1α Signaling	3.47	0.0634	-1.941	CDKN1A,EDN1,HSPA2,IGF1,JUN,LDHA,PKM,RALA,RPS6,RRAS,TF,TGFB2,TP53
Gα12/13 Signaling	3.44	0.0769	-2.333	CDH4,CHUK,JUN,MYL12A,MYL12B,MYL6,NFKB2,NFKBIA,RALA,RRAS
Xenobiotic Metabolism AHR Signaling Pathway	3.44	0.0941	0	ALDH1A1,ALDH3B1,GSTA3,GSTM1,GSTM5,GSTO1,NFKB2,PTGES3
RANK Signaling in Osteoclasts	3.34	0.0909	-1.134	BIRC2,BIRC3,Calm1 (includes others),CHUK,GSN,JUN,NFKB2,NFKBIA
Glutathione-mediated Detoxification	3.34	0.156	-0.447	GSTA3,GSTM1,GSTM5,GSTO1,Gstt1
Cardiac Hypertrophy Signaling	3.32	0.0583	-3.207	Calm1 (includes others),HSPB1,IGF1,JUN,MYL12A,MYL12B,MYL6,RALA,RHOB,RHOC,RHOU,RRAS,TGFB2,TGFB3
Rac Signaling	3.29	0.0804	-2.333	ARPC1B,ARPC5,IQGAP2,ITGA3,JUN,NFKB2,PAK3,RALA,RRAS
Prostate Cancer Signaling	3.24	0.0879	#NUM!	CDKN1A,CHUK,CREB5,NFKB2,NFKBIA,RALA,RRAS,TP53
Death Receptor Signaling	3.24	0.0879	0.707	ACTB,ACTG1,BIRC2,BIRC3,CHUK,HSPB1,NFKB2,NFKBIA
PI3K Signaling in B Lymphocytes	3.24	0.0725	-1.667	BCL10,Calm1 (includes others),CD81,CHUK,JUN,NFAT5,NFKB2,NFKBIA,RALA,RRAS
PAK Signaling	3.06	0.0825	-2.828	ITGA3,MYL12A,MYL12B,MYL6,PAK3,PDGFD,RALA,RRAS
Angiopoietin Signaling	3.06	0.0933	-1.134	CHUK,NFKB2,NFKBIA,PAK3,RALA,RRAS,TNIP1
Phospholipase C Signaling	3.03	0.0545	-3.207	AHNAK,Calm1 (includes others),CREB5,ITGA3,MYL12A,MYL12B,MYL6,NFAT5,NFKB2,RALA,RHOB,RHOC,RHOU,RRAS
April Mediated Signaling	2.94	0.128	-0.447	CHUK,JUN,NFAT5,NFKB2,NFKBIA
BEX2 Signaling Pathway	2.92	0.0886	-1.89	CDKN1A,JUN,LGALS1,NFKB2,NFKBIA,NGF,SPP1
Chronic Myeloid Leukemia Signaling	2.89	0.0777	#NUM!	CDKN1A,CHUK,NFKB2,RALA,RRAS,TGFB2,TGFB3,TP53
IGF-1 Signaling	2.86	0.0769	-2	IGF1,IGFBP5,IGFBP7,JUN,RALA,RRAS,YWHAH,YWHAQ
Neuroinflammation Signaling Pathway	2.85	0.0502	-2.138	APP,BIRC2,BIRC3,CHUK,CREB5,HLA-A,HLA-E,JUN,MAPK15,MFGE8,NFAT5,NFKB2,NGF,TGFB2,TGFB3
B Cell Activating Factor Signaling	2.84	0.122	-1	CHUK,JUN,NFAT5,NFKB2,NFKBIA
LPS-stimulated MAPK Signaling	2.83	0.0854	-1.89	CD14,CHUK,JUN,NFKB2,NFKBIA,RALA,RRAS
Induction of Apoptosis by HIV1	2.81	0.0984	0.816	BIRC2,BIRC3,CHUK,NFKB2,NFKBIA,TP53
MIF Regulation of Innate Immunity	2.79	0.119	-1.342	CD14,JUN,NFKB2,NFKBIA,TP53
Virus Entry via Endocytic Pathways	2.78	0.0748	#NUM!	ACTB,ACTG1,CXADR,HLA-A,HLA-E,ITGA3,RALA,RRAS
Protein Kinase A Signaling	2.78	0.0451	0.258	Calm1 (includes others),CHUK,CREB5,DUSP6,MYH10,MYL12A,MYL12B,MYL6,NFAT5,NFKB2,NFKBIA,PPP1R14B,PTP4A1,SIRPA,TGFB2,TGFB3,YWHAH,YWHAQ
Senescence Pathway	2.75	0.0509	-1.069	Calm1 (includes others),CAPNS1,CDKN1A,CHUK,JUN,MAPK15,NFAT5,NFKB2,RALA,RRAS,TGFB2,TGFB3,TP53,ZFP36L1
BAG2 Signaling Pathway	2.74	0.116	1.342	CDKN1A,HSPA2,NFKB2,PSME2,TP53
Production of Nitric Oxide and Reactive Oxygen Species in Macrophages	2.74	0.0585	-2.111	CHUK,CLU,CYBA,JUN,NFKB2,NFKBIA,PPP1R14B,RHOB,RHOC,RHOU,SIRPA
Activation of IRF by Cytosolic Pattern Recognition Receptors	2.74	0.0952	0	CHUK,ISG15,JUN,NFKB2,NFKBIA,PPIB
Glycolysis I	2.74	0.154	0	ALDOA,ENO4,PFKP,PKM
Role of Osteoblasts, Osteoclasts and Chondrocytes in Rheumatoid Arthritis	2.68	0.0545	#NUM!	BIRC2,BIRC3,Calm1 (includes others),CHUK,CSF1,GSN,IGF1,ITGA3,JUN,NFAT5,NFKBIA,SPP1
CXCR4 Signaling	2.61	0.0599	-3.162	JUN,MYL12A,MYL12B,MYL6,PAK3,RALA,RHOB,RHOC,RHOU,RRAS
Axonal Guidance Signaling	2.58	0.0413	#NUM!	ADAM33,ARPC1B,ARPC5,IGF1,ITGA3,MYL12A,MYL12B,MYL6,NFAT5,NGF,PAK3,PDGFD,RALA,RRAS,SEMA3C,TUBA1A,TUBB,TUBB2A,TUBB2B,TUBB4B
fMLP Signaling in Neutrophils	2.56	0.069	-1.414	ARPC1B,ARPC5,Calm1 (includes others),NFAT5,NFKB2,NFKBIA,RALA,RRAS
Role of PKR in Interferon Induction and Antiviral Response	2.54	0.0684	-0.707	CHUK,HSPA2,JUN,NFKB2,NFKBIA,NPM1,PDGFD,TP53
PI3K/AKT Signaling	2.46	0.0571	-2.53	CDKN1A,CHUK,ITGA3,NFKB2,NFKBIA,RALA,RRAS,TP53,YWHAH,YWHAQ
FAK Signaling	2.46	0.0737	#NUM!	ACTB,ACTG1,CAPNS1,ITGA3,PAK3,RALA,RRAS
ERK5 Signaling	2.44	0.0833	-2.449	CREB5,NGF,RALA,RRAS,YWHAH,YWHAQ
4-1BB Signaling in T Lymphocytes	2.4	0.125	#NUM!	CHUK,JUN,NFKB2,NFKBIA
Acute Phase Response Signaling	2.4	0.0559	-2.333	AMBP,CHUK,CP,JUN,NFKB2,NFKBIA,RALA,RRAS,TF,TTR
Salvage Pathways of Pyrimidine Ribonucleotides	2.39	0.0714	0.378	APOBEC3B,DAPK1,HIPK1,MAK,NME1,NME5,PAK3
Estrogen-Dependent Breast Cancer Signaling	2.38	0.0811	-2.449	CREB5,IGF1,JUN,NFKB2,RALA,RRAS
Hypoxia Signaling in the Cardiovascular System	2.38	0.0811	-1.342	CREB5,EDN1,JUN,LDHA,NFKBIA,TP53
IL-6 Signaling	2.36	0.064	-1.89	CD14,CHUK,HSPB1,JUN,NFKB2,NFKBIA,RALA,RRAS
Lymphotoxin β Receptor Signaling	2.34	0.0943	#NUM!	BIRC2,CHUK,NFKB2,NFKBIA,RELB
Neurotrophin/TRK Signaling	2.33	0.0789	-1.633	CREB5,JUN,NGF,RALA,RRAS,SPRY1
Macropinocytosis Signaling	2.33	0.0789	#NUM!	CD14,CSF1,NGF,PDGFD,RALA,RRAS
PKCθ Signaling in T Lymphocytes	2.32	0.0581	-2.333	BCL10,CHUK,HLA-A,JUN,NFAT5,NFKB2,NFKBIA,RALA,RRAS
Inhibition of Angiogenesis by TSP1	2.3	0.118	#NUM!	CD47,HSPG2,JUN,TP53
B Cell Receptor Signaling	2.3	0.0541	-1.897	BCL10,Calm1 (includes others),CHUK,CREB5,JUN,NFAT5,NFKB2,NFKBIA,RALA,RRAS
Sumoylation Pathway	2.27	0.068	0.816	JUN,NFKB2,NFKBIA,RHOB,RHOC,RHOU,TP53
Semaphorin Neuronal Repulsive Signaling Pathway	2.26	0.0615	0	ITGA3,MYL12A,MYL12B,MYL6,PAK3,Pde4d,RRAS,TP53
IL-17A Signaling in Fibroblasts	2.25	0.114	#NUM!	CHUK,JUN,NFKB2,NFKBIA
PPAR Signaling	2.25	0.0673	1.89	CHUK,JUN,NFKB2,NFKBIA,PDGFD,RALA,RRAS
Thyroid Cancer Signaling	2.24	0.0759	-2.449	IGF1,JUN,NGF,RALA,RRAS,TP53
Cellular Effects of Sildenafil (Viagra)	2.24	0.0611	#NUM!	ACTB,ACTG1,Calm1 (includes others),MYH10,MYH14,MYL12A,MYL12B,MYL6
Xenobiotic Metabolism Signaling	2.17	0.0453	#NUM!	ALDH1A1,ALDH3B1,FMO2,GCLC,GSTA3,GSTM1,GSTM5,GSTO1,NFKB2,PTGES3,RALA,RRAS,UGT2B7
Clathrin-mediated Endocytosis Signaling	2.17	0.0518	#NUM!	ACTB,ACTG1,ARPC1B,ARPC5,CD2AP,CLU,CTTN,IGF1,PDGFD,TF
ERK/MAPK Signaling	2.17	0.0518	-2.121	CREB5,DUSP6,HSPB1,ITGA3,PAK3,PPP1R14B,RALA,RRAS,YWHAH,YWHAQ
NF-κB Activation by Viruses	2.16	0.0732	-1.633	CHUK,ITGA3,NFKB2,NFKBIA,RALA,RRAS
HMGB1 Signaling	2.14	0.0545	-3	JUN,NFKB2,RALA,RHOB,RHOC,RHOU,RRAS,TGFB2,TGFB3
Glioblastoma Multiforme Signaling	2.14	0.0545	-2.333	CDKN1A,IGF1,PDGFD,RALA,RHOB,RHOC,RHOU,RRAS,TP53
Molecular Mechanisms of Cancer	2.13	0.0409	#NUM!	BIRC2,BIRC3,CDKN1A,ITGA3,JUN,NFKB2,NFKBIA,PAK3,RALA,RHOB,RHOC,RHOU,RRAS,TGFB2,TGFB3,TP53
Glioma Signaling	2.12	0.0636	-1.342	Calm1 (includes others),CDKN1A,IGF1,PDGFD,RALA,RRAS,TP53
Inhibition of Matrix Metalloproteases	2.09	0.103	#NUM!	HSPG2,TIMP2,TIMP3,TIMP4
NGF Signaling	2.03	0.0614	-1.89	CHUK,CREB5,NFKB2,NGF,RALA,RRAS,TP53
Xenobiotic Metabolism General Signaling Pathway	2.02	0.0559	0	GCLC,GSTA3,GSTM1,GSTM5,GSTO1,RALA,RRAS,UGT2B7
Altered T Cell and B Cell Signaling in Rheumatoid Arthritis	1.97	0.0667	#NUM!	CHUK,CSF1,HLA-A,NFKB2,RELB,SPP1
Protein Ubiquitination Pathway	1.95	0.044	#NUM!	BIRC2,BIRC3,CRYAB,DNAJB13,DNAJB4,HLA-A,HLA-E,HSPA2,HSPA4L,HSPB1,PSME2,USP2
Apelin Cardiac Fibroblast Signaling Pathway	1.95	0.13	#NUM!	SPHK1,TGFB2,TGFB3
Pyridoxal 5'-phosphate Salvage Pathway	1.94	0.0758	1.342	DAPK1,HIPK1,MAK,PAK3,PDXK
NF-κB Signaling	1.92	0.0503	-1	BCL10,CHUK,NFKB2,NFKBIA,NGF,RALA,RELB,RRAS,TNIP1
Cell Cycle: G1/S Checkpoint Regulation	1.91	0.0746	#NUM!	CDKN1A,RPL5,TGFB2,TGFB3,TP53
Glutathione Redox Reactions I	1.9	0.125	#NUM!	GPX1,GSTM1,Gstt1
Role of NFAT in Regulation of the Immune Response	1.89	0.0497	-1.414	Calm1 (includes others),CHUK,HLA-A,JUN,NFAT5,NFKB2,NFKBIA,RALA,RRAS
IL-10 Signaling	1.86	0.0725	#NUM!	CD14,CHUK,JUN,NFKB2,NFKBIA
Role of Oct4 in Mammalian Embryonic Stem Cell Pluripotency	1.84	0.087	#NUM!	FOXA2,PHB,SPP1,TP53
PFKFB4 Signaling Pathway	1.84	0.087	-1	CREB5,TGFB2,TGFB3,TP53
Amyotrophic Lateral Sclerosis Signaling	1.82	0.0619	0.816	BIRC2,BIRC3,CAPNS1,GPX1,IGF1,TP53
Small Cell Lung Cancer Signaling	1.81	0.0704	#NUM!	BIRC2,CHUK,NFKB2,NFKBIA,TP53
PTEN Signaling	1.81	0.0556	1.89	CDKN1A,CHUK,ITGA3,NFKB2,RALA,RRAS,YWHAH
Gluconeogenesis I	1.8	0.115	#NUM!	ALDOA,ENO4,ME1
Prostanoid Biosynthesis	1.77	0.2	#NUM!	CYP2S1,PTGES3
Caveolar-mediated Endocytosis Signaling	1.76	0.0685	#NUM!	ACTB,ACTG1,HLA-A,HLA-E,ITGA3
LPS/IL-1 Mediated Inhibition of RXR Function	1.75	0.0446	#NUM!	ACSL3,ALDH1A1,ALDH3B1,CD14,FMO2,GSTA3,GSTM1,GSTM5,GSTO1,JUN
Cell Cycle: G2/M DNA Damage Checkpoint Regulation	1.74	0.0816	#NUM!	CDKN1A,TP53,YWHAH,YWHAQ
Melanoma Signaling	1.72	0.08	-1	CDKN1A,RALA,RRAS,TP53
Erythropoietin Signaling	1.7	0.0658	#NUM!	JUN,NFKB2,NFKBIA,RALA,RRAS
Toll-like Receptor Signaling	1.7	0.0658	-1	CD14,CHUK,JUN,NFKB2,NFKBIA
Tec Kinase Signaling	1.69	0.0488	-2.828	ACTB,ACTG1,ITGA3,NFKB2,PAK3,RHOB,RHOC,RHOU
UVC-Induced MAPK Signaling	1.69	0.0784	-2	JUN,RALA,RRAS,TP53
Gap Junction Signaling	1.67	0.0455	#NUM!	ACTB,ACTG1,RALA,RRAS,TUBA1A,TUBB,TUBB2A,TUBB2B,TUBB4B
VDR/RXR Activation	1.65	0.0641	#NUM!	CD14,CDKN1A,IGFBP5,SPP1,TGFB2
IL-8 Signaling	1.64	0.045	-2.333	CHUK,JUN,LASP1,MYL12B,RALA,RHOB,RHOC,RHOU,RRAS
Dopamine Degradation	1.63	0.1	#NUM!	ALDH1A1,ALDH3B1,COMT
CD27 Signaling in Lymphocytes	1.63	0.0755	#NUM!	CHUK,JUN,NFKB2,NFKBIA
CDK5 Signaling	1.62	0.0556	-1.342	ITGA3,MAPK15,NGF,PPP1R14B,RALA,RRAS
Paxillin Signaling	1.62	0.0556	-2.449	ACTB,ACTG1,ITGA3,PAK3,RALA,RRAS
JAK/Stat Signaling	1.61	0.0625	-2.236	CDKN1A,JUN,NFKB2,RALA,RRAS
Pancreatic Adenocarcinoma Signaling	1.6	0.055	-1	CDKN1A,NFKB2,RALA,TGFB2,TGFB3,TP53
iCOS-iCOSL Signaling in T Helper Cells	1.57	0.0541	-0.447	Calm1 (includes others),CHUK,HLA-A,NFAT5,NFKB2,NFKBIA
Thrombin Signaling	1.55	0.0433	-2.449	MYL12A,MYL12B,MYL6,NFKB2,RALA,RHOB,RHOC,RHOU,RRAS
Osteoarthritis Pathway	1.51	0.0427	-0.707	ANXA5,CHUK,CREB5,ITGA3,NFKB2,SDC4,SPHK1,SPP1,TIMP3
PDGF Signaling	1.49	0.0581	-2.236	JUN,PDGFD,RALA,RRAS,SPHK1
MIF-mediated Glucocorticoid Regulation	1.49	0.0882	#NUM!	CD14,NFKB2,NFKBIA
Granulocyte Adhesion and Diapedesis	1.48	0.0444	#NUM!	CLDN10,CLDN2,CLDN4,CLDN6,CLDN7,CXCL16,ITGA3,SDC4
Ephrin Receptor Signaling	1.48	0.0444	-2.646	ARPC1B,ARPC5,CREB5,ITGA3,PAK3,PDGFD,RALA,RRAS
Role of Tissue Factor in Cancer	1.47	0.0513	#NUM!	CSF1,F3,ITGA3,RALA,RRAS,TP53
Noradrenaline and Adrenaline Degradation	1.46	0.0857	#NUM!	ALDH1A1,ALDH3B1,COMT
Semaphorin Signaling in Neurons	1.46	0.0667	#NUM!	PAK3,RHOB,RHOC,RHOU
Ceramide Signaling	1.46	0.0568	-2.236	JUN,NFKB2,RALA,RRAS,SPHK1
Cholecystokinin/Gastrin-mediated Signaling	1.44	0.0504	-2.449	JUN,RALA,RHOB,RHOC,RHOU,RRAS
Crosstalk between Dendritic Cells and Natural Killer Cells	1.44	0.0562	#NUM!	ACTB,ACTG1,HLA-A,HLA-E,NFKB2
Colorectal Cancer Metastasis Signaling	1.43	0.0395	-2.121	JUN,NFKB2,RALA,RHOB,RHOC,RHOU,RRAS,TGFB2,TGFB3,TP53
Hepatic Cholestasis	1.42	0.0432	#NUM!	CD14,CHUK,JUN,NFKB2,NFKBIA,SLCO3A1,TGFB2,TGFB3
OX40 Signaling Pathway	1.42	0.0556	#NUM!	HLA-A,HLA-E,JUN,NFKB2,NFKBIA
LXR/RXR Activation	1.41	0.0496	1.633	AMBP,CD14,CLU,NFKB2,TF,TTR
L-DOPA Degradation	1.39	0.5	#NUM!	COMT
Regulation Of The Epithelial Mesenchymal Transition By Growth Factors Pathway	1.39	0.0426	-2.121	CHUK,JUN,NFKB2,PDGFD,RALA,RRAS,TGFB2,TGFB3
Xenobiotic Metabolism CAR Signaling Pathway	1.38	0.0423	0	ALDH1A1,ALDH3B1,FMO2,GSTA3,GSTM1,GSTM5,GSTO1,UGT2B7
PPARα/RXRα Activation	1.37	0.0421	1.89	CHUK,JUN,NFKB2,NFKBIA,RALA,RRAS,TGFB2,TGFB3
Necroptosis Signaling Pathway	1.36	0.0446	-1.134	BIRC2,BIRC3,CAPNS1,CHUK,DAPK1,TNIP1,TP53
CD40 Signaling	1.35	0.0615	0	CHUK,JUN,NFKB2,NFKBIA
Regulation of Cellular Mechanics by Calpain Protease	1.35	0.0615	-2	CAPNS1,ITGA3,RALA,RRAS
Gαq Signaling	1.35	0.0443	-0.816	Calm1 (includes others),CHUK,NFKB2,NFKBIA,RHOB,RHOC,RHOU
Xenobiotic Metabolism PXR Signaling Pathway	1.34	0.0417	0	ALDH1A1,ALDH3B1,GSTA3,GSTM1,GSTM5,GSTO1,PPP1R14B,UGT2B7
Antiproliferative Role of TOB in T Cell Signaling	1.34	0.0769	#NUM!	TGFB2,TGFB3,TOB1
Antigen Presentation Pathway	1.34	0.0769	#NUM!	HLA-A,HLA-E,TAPBP
γ-linolenate Biosynthesis II (Animals)	1.33	0.118	#NUM!	ACSL3,CYB5A
Histamine Degradation	1.33	0.118	#NUM!	ALDH1A1,ALDH3B1
Atherosclerosis Signaling	1.33	0.0472	#NUM!	CLU,CSF1,F3,NFKB2,PDGFD,TNFRSF12A
RAR Activation	1.32	0.0412	#NUM!	ACTB,ALDH1A1,JUN,NFKB2,RELB,TGFB2,TGFB3,TNIP1
Neuregulin Signaling	1.32	0.0521	-1	ERRFI1,ITGA3,RALA,RPS6,RRAS
TGF-β Signaling	1.32	0.0521	-2.236	JUN,RALA,RRAS,TGFB2,TGFB3
ATM Signaling	1.3	0.0515	0	CDKN1A,CREB5,JUN,NFKBIA,TP53
Bladder Cancer Signaling	1.3	0.0515	#NUM!	CDKN1A,DAPK1,RALA,RRAS,TP53
Natural Killer Cell Signaling	1.29	0.0406	-0.707	HLA-A,HLA-E,HSPA2,NFAT5,NFKB2,PAK3,RALA,RRAS
Mechanisms of Viral Exit from Host Cells	1.29	0.0732	#NUM!	ACTB,ACTG1,CHMP4C
SPINK1 General Cancer Pathway	1.27	0.058	-2	Mt1,Mt2,RALA,RRAS
Role of IL-17F in Allergic Inflammatory Airway Diseases	1.26	0.0714	#NUM!	CREB5,IGF1,NFKB2
IL-12 Signaling and Production in Macrophages	1.26	0.0455	#NUM!	CHUK,CLU,JUN,NFKB2,TGFB2,TGFB3
GADD45 Signaling	1.24	0.105	#NUM!	CDKN1A,TP53
Oxidative Ethanol Degradation III	1.24	0.105	#NUM!	ALDH1A1,ALDH3B1
Oncostatin M Signaling	1.24	0.0698	#NUM!	RALA,RRAS,TIMP3
Systemic Lupus Erythematosus In B Cell Signaling Pathway	1.23	0.0364	-2.53	BCL10,Calm1 (includes others),ISG15,JUN,NFAT5,NFKB2,RALA,RRAS,TGFB2,TGFB3
Glutathione Biosynthesis	1.22	0.333	#NUM!	GCLC
Tyrosine Biosynthesis IV	1.22	0.333	#NUM!	PAH
Role of RIG1-like Receptors in Antiviral Innate Immunity	1.21	0.0682	#NUM!	CHUK,NFKB2,NFKBIA
Fatty Acid α-oxidation	1.2	0.1	#NUM!	ALDH1A1,ALDH3B1
GNRH Signaling	1.18	0.0405	-1.633	Calm1 (includes others),CREB5,JUN,NFKB2,PAK3,RALA,RRAS
Putrescine Degradation III	1.16	0.0952	#NUM!	ALDH1A1,ALDH3B1
Hereditary Breast Cancer Signaling	1.16	0.0429	#NUM!	ACTB,CDKN1A,NPM1,RALA,RRAS,TP53
Telomerase Signaling	1.16	0.0467	#NUM!	CDKN1A,PTGES3,RALA,RRAS,TP53
Pyrimidine Deoxyribonucleotides De Novo Biosynthesis I	1.13	0.0909	#NUM!	NME1,NME5
Antioxidant Action of Vitamin C	1.13	0.0459	#NUM!	CHUK,GSTO1,NFKB2,NFKBIA,TXN
Estrogen Receptor Signaling	1.11	0.0335	-2.714	CDKN1A,CREB5,IGF1,JUN,MYL12A,MYL12B,MYL6,NFKB2,RALA,RRAS,TP53
HGF Signaling	1.1	0.045	-2.236	CDKN1A,ITGA3,JUN,RALA,RRAS
Type I Diabetes Mellitus Signaling	1.1	0.045	#NUM!	CHUK,HLA-A,HLA-E,NFKB2,NFKBIA
Arsenate Detoxification I (Glutaredoxin)	1.1	0.25	#NUM!	GSTO1
Methylmalonyl Pathway	1.1	0.25	#NUM!	MCEE
Ascorbate Recycling (Cytosolic)	1.1	0.25	#NUM!	GSTO1
Phenylalanine Degradation I (Aerobic)	1.1	0.25	#NUM!	PAH
Ethanol Degradation IV	1.1	0.087	#NUM!	ALDH1A1,ALDH3B1
Renal Cell Carcinoma Signaling	1.08	0.05	-2	JUN,PAK3,RALA,RRAS
Chemokine Signaling	1.08	0.05	-1	Calm1 (includes others),JUN,RALA,RRAS
Myc Mediated Apoptosis Signaling	1.08	0.06	#NUM!	CHUK,NFKB2,TP53
Dendritic Cell Maturation	1.08	0.0383	-1.633	CHUK,CREB5,HLA-A,HLA-E,NFKB2,NFKBIA,RELB
Cyclins and Cell Cycle Regulation	1.07	0.0494	1	CDKN1A,TGFB2,TGFB3,TP53
Tumoricidal Function of Hepatic Natural Killer Cells	1.06	0.0833	#NUM!	ENDOG,SERPINB9
Vitamin-C Transport	1.06	0.0833	#NUM!	GSTO1,TXN
Apelin Adipocyte Signaling Pathway	1.05	0.0488	-1	GPX1,GSTM1,Gstt1,MAPK15
Endocannabinoid Developing Neuron Pathway	1.05	0.0435	-0.447	CREB5,MAPK15,RALA,RAP1GAP,RRAS
Apelin Endothelial Signaling Pathway	1.05	0.0435	-1.342	Calm1 (includes others),JUN,NFKB2,RALA,RRAS
Tryptophan Degradation X (Mammalian, via Tryptamine)	1.03	0.08	#NUM!	ALDH1A1,ALDH3B1
Sphingosine-1-phosphate Signaling	1.03	0.0427	-2.236	PDGFD,RHOB,RHOC,RHOU,SPHK1
HER-2 Signaling in Breast Cancer	1.02	0.0476	#NUM!	CDKN1A,RALA,RRAS,TP53
Renin-Angiotensin Signaling	1.02	0.0424	-2.236	JUN,NFKB2,PAK3,RALA,RRAS
p38 MAPK Signaling	1.02	0.0424	-2	CREB5,HSPB1,TGFB2,TGFB3,TP53
HIPPO signaling	1.01	0.0471	#NUM!	FRMD6,PPP1R14B,YWHAH,YWHAQ
IL-4 Signaling	1.01	0.0471	#NUM!	HLA-A,NFAT5,RALA,RRAS
BMP signaling pathway	1.01	0.0471	-2	JUN,NFKB2,RALA,RRAS
2-oxobutanoate Degradation I	1.01	0.2	#NUM!	MCEE
Inhibition of ARE-Mediated mRNA Degradation Pathway	0.971	0.041	-0.447	MAPK15,PSME2,YWHAH,YWHAQ,ZFP36L1
Aldosterone Signaling in Epithelial Cells	0.967	0.038	#NUM!	CRYAB,DNAJB13,DNAJB4,HSPA2,HSPA4L,HSPB1
Role of Macrophages, Fibroblasts and Endothelial Cells in Rheumatoid Arthritis	0.955	0.0321	#NUM!	Calm1 (includes others),CHUK,CREB5,CSF1,JUN,NFAT5,NFKBIA,PDGFD,RALA,RRAS
Huntington's Disease Signaling	0.932	0.0338	-0.816	CAPNS1,CREB5,HSPA2,IGF1,JUN,NGF,PSME2,TP53
MSP-RON Signaling Pathway	0.932	0.0517	#NUM!	ACTB,ACTG1,CSF1
Pyruvate Fermentation to Lactate	0.932	0.167	#NUM!	LDHA
Cancer Drug Resistance By Drug Efflux	0.932	0.0517	#NUM!	RALA,RRAS,TP53
FXR/RXR Activation	0.928	0.0397	#NUM!	AMBP,CLU,FOXA2,TF,TTR
IL-1 Signaling	0.928	0.044	-1	CHUK,JUN,NFKB2,NFKBIA
Role of p14/p19ARF in Tumor Suppression	0.924	0.069	#NUM!	NPM1,TP53
P2Y Purigenic Receptor Signaling Pathway	0.917	0.0394	-2.236	CREB5,JUN,NFKB2,RALA,RRAS
Endometrial Cancer Signaling	0.9	0.05	#NUM!	RALA,RRAS,TP53
PCP pathway	0.9	0.05	#NUM!	JUN,JUNB,JUND
Synaptic Long Term Potentiation	0.896	0.0388	-0.447	Calm1 (includes others),CREB5,PPP1R14B,RALA,RRAS
p70S6K Signaling	0.896	0.0388	#NUM!	RALA,RPS6,RRAS,YWHAH,YWHAQ
Fcγ Receptor-mediated Phagocytosis in Macrophages and Monocytes	0.893	0.0426	-2	ACTB,ACTG1,ARPC1B,ARPC5
ErbB Signaling	0.893	0.0426	-2	JUN,PAK3,RALA,RRAS
IL-2 Signaling	0.886	0.0492	#NUM!	JUN,RALA,RRAS
Cardiac Hypertrophy Signaling (Enhanced)	0.883	0.0287	-2.673	Calm1 (includes others),CHUK,EDN1,HSPB1,IGF1,ITGA3,JUN,NFAT5,NFKB2,RALA,RPS6,RRAS,TGFB2,TGFB3
Calcium Signaling	0.876	0.034	-1	Calm1 (includes others),CHRNB1,CREB5,MYH10,MYH14,MYL6,NFAT5
Thioredoxin Pathway	0.87	0.143	#NUM!	TXN
Wnt/Ca+ pathway	0.87	0.0484	#NUM!	CREB5,NFAT5,NFKB2
Thrombopoietin Signaling	0.854	0.0476	#NUM!	JUN,RALA,RRAS
Ethanol Degradation II	0.854	0.0625	#NUM!	ALDH1A1,ALDH3B1
UVA-Induced MAPK Signaling	0.845	0.0408	#NUM!	JUN,RALA,RRAS,TP53
IL-17A Signaling in Airway Cells	0.842	0.0469	#NUM!	CHUK,NFKB2,NFKBIA
Human Embryonic Stem Cell Pluripotency	0.836	0.037	#NUM!	NGF,PDGFD,SPHK1,TGFB2,TGFB3
STAT3 Pathway	0.836	0.037	-2	CDKN1A,IGF1,RALA,RRAS,TGFB2
Circadian Rhythm Signaling	0.833	0.0606	#NUM!	CREB5,CRY2
VEGF Signaling	0.833	0.0404	-2	ACTB,ACTG1,RALA,RRAS
Apelin Cardiomyocyte Signaling Pathway	0.833	0.0404	-1	MAPK15,MYL12A,MYL12B,MYL6
ErbB2-ErbB3 Signaling	0.827	0.0462	#NUM!	JUN,RALA,RRAS
Nicotine Degradation II	0.827	0.0462	#NUM!	CYP2S1,FMO2,UGT2B7
T Cell Exhaustion Signaling Pathway	0.818	0.0343	#NUM!	HLA-A,HLA-E,JUN,NFAT5,RALA,RRAS
Salvage Pathways of Pyrimidine Deoxyribonucleotides	0.815	0.125	#NUM!	APOBEC3B
Cytotoxic T Lymphocyte-mediated Apoptosis of Target Cells	0.812	0.0588	#NUM!	HLA-A,HLA-E
SAPK/JNK Signaling	0.801	0.0392	-1	JUN,RALA,RRAS,TP53
Serotonin Degradation	0.799	0.0448	#NUM!	ALDH1A1,ALDH3B1,UGT2B7
DNA Methylation and Transcriptional Repression Signaling	0.793	0.0571	#NUM!	CHD3,MBD3
Breast Cancer Regulation by Stathmin1	0.793	0.0271	#NUM!	CREB5,IGF1,JUN,NFKB2,PPP1R14B,PTGFR,RALA,RRAS,STMN1,TGFB2,TP53,TUBA1A,TUBB,TUBB2A,TUBB2B,TUBB4B
Type II Diabetes Mellitus Signaling	0.772	0.0352	-1	ACSL3,CHUK,NFKB2,NFKBIA,PKM
D-myo-inositol (1,4,5,6)-Tetrakisphosphate Biosynthesis	0.772	0.0352	-0.447	ATP1A1,NUDT4,PPP1R14B,SIRPA,TNS3
D-myo-inositol (3,4,5,6)-tetrakisphosphate Biosynthesis	0.772	0.0352	-0.447	ATP1A1,NUDT4,PPP1R14B,SIRPA,TNS3
Sucrose Degradation V (Mammalian)	0.77	0.111	#NUM!	ALDOA
PD-1, PD-L1 cancer immunotherapy pathway	0.759	0.0377	#NUM!	HLA-A,HLA-E,TGFB2,TGFB3
Corticotropin Releasing Hormone Signaling	0.747	0.0345	#NUM!	ARPC5,Calm1 (includes others),CREB5,JUN,JUND
Calcium Transport I	0.728	0.1	#NUM!	ANXA5
Non-Small Cell Lung Cancer Signaling	0.724	0.0411	#NUM!	RALA,RRAS,TP53
G-Protein Coupled Receptor Signaling	0.703	0.0294	#NUM!	CHUK,CREB5,DUSP6,NFKB2,NFKBIA,RALA,RAP1GAP,RRAS
IL-15 Signaling	0.699	0.04	#NUM!	NFKB2,RALA,RRAS
γ-glutamyl Cycle	0.69	0.0909	#NUM!	GCLC
Regulation of the Epithelial-Mesenchymal Transition Pathway	0.69	0.0312	#NUM!	NFKB2,PDGFD,RALA,RRAS,TGFB2,TGFB3
GDNF Family Ligand-Receptor Interactions	0.688	0.0395	#NUM!	JUN,RALA,RRAS
Antiproliferative Role of Somatostatin Receptor 2	0.676	0.039	#NUM!	CDKN1A,RALA,RRAS
Pyrimidine Ribonucleotides Interconversion	0.672	0.0476	#NUM!	NME1,NME5
3-phosphoinositide Degradation	0.662	0.0321	-0.447	ATP1A1,NUDT4,PPP1R14B,SIRPA,TNS3
Hematopoiesis from Multipotent Stem Cells	0.658	0.0833	#NUM!	CSF1
IL-3 Signaling	0.656	0.038	#NUM!	JUN,RALA,RRAS
D-myo-inositol-5-phosphate Metabolism	0.654	0.0318	-0.447	ATP1A1,NUDT4,PPP1R14B,SIRPA,TNS3
Role of BRCA1 in DNA Damage Response	0.644	0.0375	#NUM!	ACTB,CDKN1A,TP53
IL-17 Signaling	0.644	0.0375	#NUM!	JUN,RALA,RRAS
FLT3 Signaling in Hematopoietic Progenitor Cells	0.644	0.0375	#NUM!	CREB5,RALA,RRAS
Pyrimidine Ribonucleotides De Novo Biosynthesis	0.642	0.0455	#NUM!	NME1,NME5
IL-23 Signaling Pathway	0.642	0.0455	#NUM!	NFKB2,NFKBIA
Prolactin Signaling	0.635	0.037	#NUM!	JUN,RALA,RRAS
HOTAIR Regulatory Pathway	0.633	0.0312	-1.342	CDKN1A,NFKB2,NFKBIA,RHOC,SPP1
Fatty Acid Activation	0.625	0.0769	#NUM!	ACSL3
Oleate Biosynthesis II (Animals)	0.625	0.0769	#NUM!	CYB5A
Opioid Signaling Pathway	0.609	0.0283	-0.378	Calm1 (includes others),CREB5,MAPK15,NFKB2,NFKBIA,RALA,RRAS
Sirtuin Signaling Pathway	0.602	0.0275	0.378	APP,DUSP6,JUN,LDHA,MAPK15,NFKB2,TP53,TUBA1A
Systemic Lupus Erythematosus In T Cell Signaling Pathway	0.602	0.0269	-0.333	CREB5,HLA-A,HLA-E,JUN,RALA,RHOB,RHOC,RHOU,RRAS
CCR3 Signaling in Eosinophils	0.6	0.0323	#NUM!	Calm1 (includes others),PAK3,RALA,RRAS
nNOS Signaling in Neurons	0.6	0.0426	#NUM!	Calm1 (includes others),CAPNS1
Triacylglycerol Degradation	0.6	0.0426	#NUM!	AADAC,AARS1
3-phosphoinositide Biosynthesis	0.592	0.0301	-0.447	ATP1A1,NUDT4,PPP1R14B,SIRPA,TNS3
Phagosome Formation	0.592	0.032	#NUM!	ITGA3,RHOB,RHOC,RHOU
Graft-versus-Host Disease Signaling	0.587	0.0417	#NUM!	HLA-A,HLA-E
Autoimmune Thyroid Disease Signaling	0.573	0.0408	#NUM!	HLA-A,HLA-E
Reelin Signaling in Neurons	0.562	0.031	-2	APP,ARPC1B,ARPC5,ITGA3
Amyloid Processing	0.562	0.04	#NUM!	APP,CAPNS1
Mitochondrial Dysfunction	0.559	0.0292	#NUM!	APP,COX7A2L,CYB5A,PRDX5,UQCR10
Acute Myeloid Leukemia Signaling	0.559	0.0337	#NUM!	NFKB2,RALA,RRAS
Role of NFAT in Cardiac Hypertrophy	0.556	0.028	-1.633	Calm1 (includes others),IGF1,RALA,RRAS,TGFB2,TGFB3
Granzyme B Signaling	0.548	0.0625	#NUM!	ENDOG
Extrinsic Prothrombin Activation Pathway	0.548	0.0625	#NUM!	F3
Glutaryl-CoA Degradation	0.548	0.0625	#NUM!	CYP2S1
Wnt/β-catenin Signaling	0.548	0.0289	0.447	JUN,SOX4,TGFB2,TGFB3,TP53
UVB-Induced MAPK Signaling	0.538	0.0385	#NUM!	JUN,TP53
Mitochondrial L-carnitine Shuttle Pathway	0.527	0.0588	#NUM!	ACSL3
Melanocyte Development and Pigmentation Signaling	0.517	0.0319	#NUM!	CREB5,RALA,RRAS
Role of IL-17A in Arthritis	0.516	0.037	#NUM!	NFKB2,NFKBIA
FAT10 Signaling Pathway	0.506	0.0556	#NUM!	PSME2
Synaptogenesis Signaling Pathway	0.506	0.0256	-1.414	ARPC1B,ARPC5,Calm1 (includes others),CDH4,CREB5,RALA,RRAS,SYT7
α-Adrenergic Signaling	0.5	0.0312	#NUM!	Calm1 (includes others),RALA,RRAS
Ovarian Cancer Signaling	0.495	0.0288	#NUM!	EDN1,RALA,RRAS,TP53
Granzyme A Signaling	0.487	0.0526	#NUM!	NME1
DNA damage-induced 14-3-3σ Signaling	0.487	0.0526	#NUM!	TP53
p53 Signaling	0.485	0.0306	#NUM!	CDKN1A,JUN,TP53
CNTF Signaling	0.485	0.0351	#NUM!	RALA,RRAS
Role of CHK Proteins in Cell Cycle Checkpoint Control	0.485	0.0351	#NUM!	CDKN1A,TP53
Nicotine Degradation III	0.485	0.0351	#NUM!	CYP2S1,UGT2B7
Systemic Lupus Erythematosus Signaling	0.48	0.0262	#NUM!	HLA-A,HLA-E,JUN,NFAT5,RALA,RRAS
Inflammasome pathway	0.469	0.05	#NUM!	NFKB2
Maturity Onset Diabetes of Young (MODY) Signaling	0.465	0.0339	#NUM!	FOXA2,NFKB2
Endothelin-1 Signaling	0.463	0.0266	-1.342	EDN1,JUN,MAPK15,RALA,RRAS
Melatonin Degradation I	0.456	0.0333	#NUM!	CYP2S1,UGT2B7
Mouse Embryonic Stem Cell Pluripotency	0.45	0.0291	#NUM!	RALA,RRAS,TP53
Autophagy	0.447	0.0328	#NUM!	CTSH,CTSV
Polyamine Regulation in Colon Cancer	0.435	0.0455	#NUM!	PSME2
Role of PI3K/AKT Signaling in the Pathogenesis of Influenza	0.42	0.0312	#NUM!	NFKB2,NFKBIA
Tryptophan Degradation III (Eukaryotic)	0.42	0.0435	#NUM!	CYP2S1
Adrenomedullin signaling pathway	0.42	0.0254	-0.447	Calm1 (includes others),MAPK15,NFKB2,RALA,RRAS
PXR/RXR Activation	0.412	0.0308	#NUM!	ALDH1A1,GSTM1
Superpathway of Melatonin Degradation	0.412	0.0308	#NUM!	CYP2S1,UGT2B7
Superpathway of Inositol Phosphate Compounds	0.411	0.0251	-0.447	ATP1A1,NUDT4,PPP1R14B,SIRPA,TNS3
Oxidative Phosphorylation	0.411	0.0275	#NUM!	COX7A2L,CYB5A,UQCR10
Role of JAK1, JAK2 and TYK2 in Interferon Signaling	0.407	0.0417	#NUM!	NFKB2
Calcium-induced T Lymphocyte Apoptosis	0.405	0.0303	#NUM!	Calm1 (includes others),HLA-A
ErbB4 Signaling	0.397	0.0299	#NUM!	RALA,RRAS
IL-17A Signaling in Gastric Cells	0.393	0.04	#NUM!	JUN
Bupropion Degradation	0.393	0.04	#NUM!	CYP2S1
Role of JAK1 and JAK3 in γc Cytokine Signaling	0.381	0.029	#NUM!	RALA,RRAS
Estrogen-mediated S-phase Entry	0.38	0.0385	#NUM!	CDKN1A
Apelin Liver Signaling Pathway	0.38	0.0385	#NUM!	EDN1
GM-CSF Signaling	0.374	0.0286	#NUM!	RALA,RRAS
Neuroprotective Role of THOP1 in Alzheimer's Disease	0.37	0.0259	#NUM!	APP,HLA-A,HLA-E
Heparan Sulfate Biosynthesis (Late Stages)	0.367	0.0282	#NUM!	AADAC,AARS1
Airway Pathology in Chronic Obstructive Pulmonary Disease	0.359	0.0254	#NUM!	AMBP,TGFB2,TGFB3
Role of NANOG in Mammalian Embryonic Stem Cell Pluripotency	0.354	0.0252	#NUM!	RALA,RRAS,TP53
AMPK Signaling	0.348	0.0234	#NUM!	ACTB,CDKN1A,CHRNB1,CREB5,PFKP
FcγRIIB Signaling in B Lymphocytes	0.339	0.0267	#NUM!	RALA,RRAS
Dopamine Receptor Signaling	0.327	0.026	#NUM!	COMT,PPP1R14B
Acetone Degradation I (to Methylglyoxal)	0.323	0.0323	#NUM!	CYP2S1
Gαi Signaling	0.323	0.024	#NUM!	RALA,RAP1GAP,RRAS
Heparan Sulfate Biosynthesis	0.321	0.0256	#NUM!	AADAC,AARS1
Fatty Acid β-oxidation I	0.314	0.0312	#NUM!	ACSL3
Role of MAPK Signaling in the Pathogenesis of Influenza	0.309	0.025	#NUM!	RALA,RRAS
IL-9 Signaling	0.305	0.0303	#NUM!	NFKB2
Role of JAK2 in Hormone-like Cytokine Signaling	0.296	0.0294	#NUM!	SIRPA
Retinoate Biosynthesis I	0.296	0.0294	#NUM!	ALDH1A1
Coagulation System	0.287	0.0286	#NUM!	F3
TR/RXR Activation	0.287	0.0238	#NUM!	ME1,PFKP
VEGF Family Ligand-Receptor Interactions	0.287	0.0238	#NUM!	RALA,RRAS
B Cell Development	0.278	0.0278	#NUM!	HLA-A
Interferon Signaling	0.278	0.0278	#NUM!	ISG15
Allograft Rejection Signaling	0.276	0.0233	#NUM!	HLA-A,HLA-E
Androgen Signaling	0.275	0.0221	#NUM!	Calm1 (includes others),JUN,NFKB2
Superpathway of Methionine Degradation	0.271	0.027	#NUM!	MCEE
Docosahexaenoic Acid (DHA) Signaling	0.263	0.0263	#NUM!	APP
Thyroid Hormone Metabolism II (via Conjugation and/or Degradation)	0.263	0.0263	#NUM!	UGT2B7
CTLA4 Signaling in Cytotoxic T Lymphocytes	0.261	0.0225	#NUM!	HLA-A,HLA-E
Insulin Receptor Signaling	0.259	0.0214	#NUM!	PPP1R14B,RALA,RRAS
tRNA Charging	0.256	0.0256	#NUM!	AARS1
Th17 Activation Pathway	0.252	0.022	#NUM!	NFAT5,NFKB2
nNOS Signaling in Skeletal Muscle Cells	0.242	0.0244	#NUM!	Calm1 (includes others)
Estrogen Biosynthesis	0.242	0.0244	#NUM!	CYP2S1
CCR5 Signaling in Macrophages	0.238	0.0213	#NUM!	Calm1 (includes others),JUN
Retinol Biosynthesis	0.235	0.0238	#NUM!	AADAC
Triacylglycerol Biosynthesis	0.235	0.0238	#NUM!	PLPP2
Communication between Innate and Adaptive Immune Cells	0.229	0.0208	#NUM!	HLA-A,HLA-E
Apelin Pancreas Signaling Pathway	0.223	0.0227	#NUM!	NFKB2
Stearate Biosynthesis I (Animals)	0.2	0.0208	#NUM!	ACSL3
Fc Epsilon RI Signaling	0	0.0171	#NUM!	RALA,RRAS
Synaptic Long Term Depression	0	0.0159	#NUM!	IGF1,RALA,RRAS
Role of Pattern Recognition Receptors in Recognition of Bacteria and Viruses	0	0.0195	#NUM!	NFKB2,TGFB2,TGFB3
TREM1 Signaling	0	0.0133	#NUM!	NFKB2
IL-15 Production	0	0.00826	#NUM!	NFKB2
T Helper Cell Differentiation	0	0.0137	#NUM!	HLA-A
Melatonin Signaling	0	0.0139	#NUM!	Calm1 (includes others)
Relaxin Signaling	0	0.02	#NUM!	JUN,NFKB2,NFKBIA
Factors Promoting Cardiogenesis in Vertebrates	0	0.02	#NUM!	CREB5,TGFB2,TGFB3
Growth Hormone Signaling	0	0.0141	#NUM!	IGF1
CREB Signaling in Neurons	0	0.0193	-1	Calm1 (includes others),CREB5,RALA,RRAS
Basal Cell Carcinoma Signaling	0	0.0139	#NUM!	TP53
G Beta Gamma Signaling	0	0.0164	#NUM!	RALA,RRAS
Nur77 Signaling in T Lymphocytes	0	0.0147	#NUM!	Calm1 (includes others)
Dopamine-DARPP32 Feedback in cAMP Signaling	0	0.0184	#NUM!	Calm1 (includes others),CREB5,PPP1R14B
Hematopoiesis from Pluripotent Stem Cells	0	0.0204	#NUM!	CSF1
eNOS Signaling	0	0.0189	#NUM!	Calm1 (includes others),CHRNB1,HSPA2
Netrin Signaling	0	0.0154	#NUM!	NFAT5
Gαs Signaling	0	0.00935	#NUM!	CREB5
Sperm Motility	0	0.00448	#NUM!	Calm1 (includes others)
Adipogenesis pathway	0	0.00746	#NUM!	TP53
Unfolded protein response	0	0.0179	#NUM!	HSPA2
EGF Signaling	0	0.0182	#NUM!	JUN
Nitric Oxide Signaling in the Cardiovascular System	0	0.0101	#NUM!	Calm1 (includes others)
Cardiac β-adrenergic Signaling	0	0.00709	#NUM!	PPP1R14B
FGF Signaling	0	0.0119	#NUM!	CREB5
cAMP-mediated signaling	0	0.0175	0	Calm1 (includes others),CREB5,DUSP6,RAP1GAP
Glutamate Receptor Signaling	0	0.0175	#NUM!	Calm1 (includes others)
Th1 and Th2 Activation Pathway	0	0.0117	#NUM!	HLA-A,JUN
Th1 Pathway	0	0.00826	#NUM!	HLA-A
Th2 Pathway	0	0.0147	#NUM!	HLA-A,JUN
GP6 Signaling Pathway	0	0.0168	#NUM!	Calm1 (includes others),COL27A1
IL-7 Signaling Pathway	0	0.0128	#NUM!	JUN
Iron homeostasis signaling pathway	0	0.0146	#NUM!	CP,TF
SPINK1 Pancreatic Cancer Pathway	0	0.0167	#NUM!	CPM
Endocannabinoid Neuronal Synapse Pathway	0	0.00781	#NUM!	MAPK15
Endocannabinoid Cancer Inhibition Pathway	0	0.014	#NUM!	CDKN1A,CREB5
White Adipose Tissue Browning Pathway	0	0.0155	#NUM!	CREB5,LDHA
Insulin Secretion Signaling Pathway	0	0.00412	#NUM!	CREB5
Regulation Of The Epithelial Mesenchymal Transition In Development Pathway	0	0.0119	#NUM!	NFKB2
Kinetochore Metaphase Signaling Pathway	0	0.0099	#NUM!	PPP1R14B
Eicosanoid Signaling	0	0.0152	#NUM!	PTGFR
