# Supplementary material for: Single-cell transcriptome analysis defines heterogeneity of the murine pancreatic ductal tree
Source: eLife. 2021 May 19;10:e67776. doi: 10.7554/eLife.67776 (PMC8184217; doi:10.7554/eLife.67776)
Supplement: Figure 2—figure supplement 3—source data 3. [file elife-67776-fig2-figsupp3-data3.xls]

## Sheet: DBA+ duct cluster 3 vs 4
© 2000-2020 QIAGEN. All rights reserved.
Upstream Regulator	Expr Log Ratio	Molecule Type	Predicted Activation State	Activation z-score	p-value of overlap	Target Molecules in Dataset	Mechanistic Network
MYC		transcription regulator	Inhibited	-4.152	7.69e-35	ACTB,AIMP2,ALDOA,ANXA5,APP,BIRC2,CAPNS1,CD151,CD47,CD9,CDKN1A,CHRNB1,CLDN7,CLU,COX7A2L,CRIP1,Crip2,CRYAB,CSRP2,CTSV,DBI,DUSP6,EDN1,EFEMP1,EPCAM,F3,FOXA2,FSTL1,GCLC,HLA-A,HLA-E,HSPB1,IER3,IQGAP2,ITGA3,ITM2B,JUN,KLF6,KRT7,LDHA,LGALS1,Ly6a (includes others),Mt1,Mt2,NFAT5,NFKBIA,NGF,NME1,NPM1,NUDC,Oasl2,PFKP,PHB,PKM,PPIA,PRDX2,RHOB,RPL10,RPL10A,RPL12,RPL14,RPL15,RPL22,Rpl23a,RPL27A,RPL3,RPL39,RPL4,RP…	235 (17)
LARP1		translation regulator	Activated	5.564	1.43e-30	EEF1A1,EEF1B2,EIF3H,RPL10,RPL10A,RPL12,RPL14,RPL15,RPL22,RPL27A,RPL3,RPL39,RPL4,RPL5,RPL6,RPL7,RPL8,RPS11,RPS12,RPS15A,RPS2,RPS20,RPS21,RPS24,RPS28,RPS29,RPS5,RPS6,RPS7,RPS9,TPT1
MLXIPL		transcription regulator	Inhibited	-5.396	2.39e-27	RPL10,RPL10A,RPL12,RPL14,RPL15,RPL22,Rpl23a,RPL27A,RPL3,RPL39,RPL4,RPL5,RPL6,RPL7,RPL8,RPLP0,RPS11,RPS12,RPS15A,RPS2,RPS20,RPS21,RPS24,RPS26,RPS27L,RPS28,RPS29,RPS4Y1,RPS5,RPS6,RPS7,RPS9,RPSA
MYCN		transcription regulator		-1.786	8e-27	ACTB,ACTG1,ALDH1A1,ALDOA,ARPC1B,CDKN1A,CLU,EEF1A1,FOXA2,FRMD6,HLA-A,IGFBP7,ITGA3,LDHA,LGALS1,MYL12A,NME1,NPM1,PHB,RPL10,RPL12,RPL22,RPL27A,RPL3,RPL39,RPL4,RPL5,RPL6,RPL7,RPL8,RPLP0,RPS12,RPS2,RPS20,RPS24,RPS26,RPS28,RPS5,RPS6,RPS7,RPS9,S100A10,SPARC,TIMP2,TP53,TUBB	195 (7)
torin1		chemical reagent		1.915	1.51e-24	ALDOA,EEF1A1,EEF1B2,EIF3H,LDHA,PFKP,PKM,RPL10,RPL10A,RPL12,RPL14,RPL15,RPL22,RPL27A,RPL3,RPL39,RPL4,RPL5,RPL6,RPL7,RPL8,RPS11,RPS12,RPS15A,RPS2,RPS20,RPS21,RPS24,RPS28,RPS29,RPS5,RPS6,RPS7,RPS9,TPT1,UQCR10
YAP1		transcription regulator	Inhibited	-2.615	1.81e-22	ACTG1,ANKRD1,CDKN1A,CSF1,EDN1,LDHA,RPL10,RPL10A,RPL12,RPL14,RPL15,RPL22,Rpl23a,RPL27A,RPL3,RPL39,RPL4,RPL5,RPL6,RPL7,RPL8,RPLP0,RPS11,RPS12,RPS15A,RPS2,RPS20,RPS21,RPS24,RPS26,RPS27L,RPS28,RPS29,RPS4Y1,RPS5,RPS6,RPS7,RPS9,RPSA,TGFB2,TUBB	190 (6)
TP53	-0.44	transcription regulator		-1.054	7.74e-21	ACSL3,ACTB,ALDH1A1,ALDOA,ANKRD1,ANXA3,APP,ARPC1B,ATP1A1,BIRC2,BIRC3,C9orf116,CAPNS1,CD47,CD81,CDKN1A,CHD3,CHMP4C,CHUK,CLU,CNN3,COMT,CP,Crip2,CRYAB,CSF1,CSRP1,CTSH,CYB5A,DAPK1,DBI,DDIT4L,DNAJB4,DUSP6,EDN1,EEF1A1,ENPP2,F3,FKBP3,FLRT2,FOXA2,FSTL1,FXYD3,GPM6B,GPX1,GSN,GSTM1,GSTM5,HSPA4L,HSPB1,HSPG2,IER3,IGF1,IGFBP5,IGFBP7,ISG15,JUN,JUNB,JUND,KLF6,KRT18,LASP1,LDHA,Ly6a (includes others),ME1,Mt2,MYH10,…	216 (15)
KRAS		enzyme		1.943	2.17e-20	AGRN,AHNAK,AIMP2,ALDOA,APP,BCAM,BCL7C,BIRC3,BSG,CDKN1A,CLU,CPM,CRYAB,CXADR,DCLK1,DUSP6,EEF1A1,EFEMP1,EPCAM,F3,FSTL1,FXYD3,GCLC,GPM6B,GSN,GSTA3,GSTM1,HSPB1,HSPG2,IER3,IQGAP2,ISG15,ITM2B,JUN,JUNB,KLF6,LDHA,Ly6a (includes others),Muc1,NFKB2,NFKBIA,NUDC,Oasl2,PDPN,PKM,Pvr,RHOB,RHOC,RPS6,RPSA,SDC4,SH2D4A,SIRPA,SPARC,SPP1,ST3GAL4,ST3GAL6,TESC,TIMP2,TIMP3,TINAGL1,TNFRSF12A,TP53,ZFP36L1	213 (19)
HRAS		enzyme		0.204	1.05e-18	ACTB,ACTG1,ANKRD1,ANXA3,APP,BIRC3,CAPG,CD81,CDKN1A,CLU,Crip2,CSF1,CSRP1,CSRP2,CTSV,DUSP6,EFEMP1,ERP29,FLRT2,FRMD6,FSTL1,GSN,HSPB1,Ifi27,IGFBP5,IQGAP2,JUN,JUNB,KLF6,KRT18,KRT19,LASP1,MAN1A1,MFGE8,MYH10,MYL12A,NFKBIA,NPM1,PRDX2,Pvr,RAP1GAP,RHOB,RPL27A,RPL39,RPS11,RPS6,SERPINB9,SIRPA,SOX4,SPARC,SPP1,TGFB2,TGFB3,TIMP3,TINAGL1,Tmsb4x (includes others),TP53	228 (22)
TNF		cytokine	Inhibited	-4.827	2.76e-18	ACTB,AEBP1,ANXA11,APOBEC3B,APP,ARL6IP5,ATP1A1,B4GALNT1,BAMBI,BCL10,BIRC2,BIRC3,Casp12,CD14,CD47,CDC42EP5,CDKN1A,CLDN4,CLDN7,CLU,COL27A1,CP,CRYAB,CSF1,CTTN,CXCL16,CYBA,DBI,DUSP6,EDN1,EFHD2,EHF,ENPP2,EPCAM,F3,FRMD6,GCLC,GPX1,Gstt1,HLA-A,HLA-E,HSPG2,IER3,IGF1,IGFBP5,ISG15,JUN,JUNB,JUND,KCNQ1OT1,KLF6,KRT18,KRT23,LDHA,MARCKSL1,Mt1,Mt2,MYH10,MYL6,NFKB2,NFKBIA,NGF,NME1,PDPN,PHB,PKM,PSME2,PTGFR,RAB32,REL…	200 (12)
CTNNB1		transcription regulator		-0.92	5.32e-18	ACTB,AGRN,ALDH1A1,APP,ARMC4,BAMBI,CAPNS1,CD47,CDKN1A,CLDN2,CLU,COL27A1,CRIP1,CYB5A,EDN1,ENPP2,EPCAM,FOXA2,IGFBP5,JUN,KRT7,LY6E,ME1,MFGE8,NFAT5,PKM,RCN1,RPL10,RPL10A,RPL12,RPL14,RPL15,RPL22,Rpl23a,RPL27A,RPL3,RPL39,RPL4,RPL5,RPL6,RPL7,RPL8,RPLP0,RPS11,RPS12,RPS15A,RPS2,RPS20,RPS21,RPS24,RPS26,RPS27L,RPS28,RPS29,RPS4Y1,RPS5,RPS6,RPS7,RPS9,RPSA,SEMA3C,SOX4,SPP1,TGFB3,TIMP3,TP53,TUBB2B	235 (16)
nitrofurantoin		chemical drug	Inhibited	-2.954	2.3e-17	ACTB,ACTG1,AMBP,ANXA5,CLU,CP,CTSV,DBI,EEF1A1,GSTM1,IER3,IGF1,KRT19,Mt1,NFKBIA,PRDX2,RPL6,RPS9,S100A10,SPP1,STMN1,TIMP3,TNFRSF12A,TP53,TTR,TUBA1A,TUBB,TXN
dihydrotestosterone		chemical - endogenous mammalian		-0.734	5.23e-16	ACSL3,ACTB,ALDOA,APP,CD63,CDKN1A,CLU,DBI,DYNLL1,Gm12854/S100a11,GSN,HLA-A,HSPB1,IGF1,IGFBP5,IGFBP7,IQGAP2,JUN,KRT19,LDHA,LGALS1,LY6E,MAK,ME1,Mt1,NFKBIA,PHB,RHOB,RPL12,RPL3,RPL5,RPL8,RPS12,RPS20,RPS24,RPS26,RPS28,RPS29,RPS4Y1,SLCO3A1,SPARC,SPP1,STBD1,TF,TGFB2,TIMP2,TIMP3,Tmsb4x (includes others),TP53	228 (17)
NFKBIA	-0.709	transcription regulator		-0.14	6.39e-16	AEBP1,ANKRD1,BIRC2,BIRC3,CDKN1A,CLU,CP,CRYAB,CSF1,CYBA,DUSP6,ENPP2,F3,GSTM5,Gstt1,HLA-A,IER3,ISG15,ITGA3,JUN,JUNB,KRT18,LY6E,MFGE8,Mt1,Mt2,NFKB2,NFKBIA,NGF,RELB,RPL27A,RPL8,RPS2,RPSA,SDC4,SEMA3C,TGFB2,TIMP2,TIMP3,TMEM176B,Tmsb4x (includes others),TP53	207 (15)
beta-estradiol		chemical - endogenous mammalian		-0.655	8.53e-16	AARS1,ACTB,AEBP1,AGR3,AGRN,Akap9,ALDOA,ANXA3,APP,BAMBI,BCL10,BIRC3,BSG,C9orf24,CD14,CDKN1A,CHUK,CLDN4,CLDN6,CLDN7,CLDND1,CLU,COMT,CP,CPM,CTSH,CTTN,CXADR,CYB5A,DCLK1,DUSP6,DYNLL1,ECHDC2,EDN1,ENPP2,ERRFI1,F3,FMO2,FSTL1,GCLC,GPX1,Gstt1,HLA-A,HLA-E,HSPA2,HSPB1,IER3,IFT122,IGF1,IGFBP5,IGFBP7,ISG15,JUN,JUNB,JUND,KLF6,KRT18,KRT19,KRT7,LDHA,MAK,Muc1,MYCBP,MYL12A,MYOF,NFE2L3,NFKB2,NFKBIA,NME1,NPM1,Oasl2,O…	256 (18)
CHUK	0.73	kinase		-1.091	2.25e-15	AEBP1,ARL6IP5,CDKN1A,CHUK,CLU,CP,CSF1,CYBA,DUSP6,ENPP2,F3,Gstt1,HLA-A,ISG15,ITM2B,JUNB,Mt1,Mt2,NFKB2,NFKBIA,NGF,RELB,SEMA3C,SNX10,SPP1,TIMP3,TMEM176B,TNIP1,TP53	192 (13)
sirolimus		chemical drug	Activated	4.085	5.76e-15	ACTB,ANXA5,APP,ATP1A1,CD151,CDKN1A,CSF1,DAD1,EEF1A1,F3,GCLC,IGFBP5,ISG15,JUN,JUNB,LDHA,Mt1,NPM1,PFKP,PKM,PPIA,PRDX5,PTP4A1,RPL10,RPL10A,RPL15,RPL27A,RPL3,RPL5,RPL8,RPLP0,RPS12,RPS2,RPS20,RPS21,RPS24,RPS26,RPS29,RPS5,RPS6,RPS7,RPS9,RPSA,STMN1,TP53,TUBB2A	229 (17)
IKBKB		kinase		-1.44	3.08e-14	AEBP1,ANKRD1,BIRC2,BIRC3,CDKN1A,CLU,CP,CSF1,CXCL16,CYBA,DUSP6,EDN1,ENPP2,F3,Gstt1,HLA-A,IGFBP7,ISG15,JUNB,KRT18,Mt1,Mt2,NFKB2,NFKBIA,NGF,RELB,SEMA3C,TIMP2,TIMP3,TMEM176B,Tmsb4x (includes others),TP53	192 (14)
IL1B		cytokine	Inhibited	-4.285	4.75e-14	APP,ARL6IP5,ATP1A1,BAMBI,BIRC2,BIRC3,CD14,CDKN1A,CP,CRYAB,CSF1,CYBA,DBI,EDN1,EHF,ENPP2,ERRFI1,F3,GCLC,HLA-A,HLA-E,HSPB1,HSPG2,IER3,IGF1,IGFBP5,ISG15,JUN,JUNB,JUND,KCNQ1OT1,KRT19,LDHA,MARCKSL1,Mt1,Mt2,NFAT5,NFKB2,NFKBIA,NGF,PFKP,PSME2,PTGFR,PTP4A1,RELB,RHOB,RPSA,S100A10,SCX,SDC4,SERPINB9,SPARC,SPP1,TGFB3,TIMP2,TIMP3,TIMP4,TMEM176B,TOB1,TPT1,TSC22D3	206 (15)
dexamethasone		chemical drug		-1.034	6.01e-14	ACSL3,ACTB,ACTG1,AEBP1,ALDH1A1,ANKRD1,ANXA3,APP,ATP1A1,BIRC2,BIRC3,BSG,CA8,Calm1 (includes others),CD47,CDH4,CDKN1A,CLU,CNN3,COL27A1,CP,CRIP1,CRYAB,CSF1,CTSV,CXADR,CYB5A,CYP2S1,DALRD3,DAPK1,DDAH2,EDN1,EEF1A1,EHF,ERRFI1,F3,FLRT2,FOXJ1,FSTL1,GCLC,GPX1,GSTM1,GSTM5,HLA-A,HPCAL1,IER3,IGF1,IGFBP5,ISG15,ITGA3,JUN,JUNB,JUND,KLF6,KRT7,LDHA,LGALS1,Ly6a (includes others),LY6E,ME1,MFGE8,Mt1,Mt2,NFKB2,NFKBIA,…	255 (16)
lipopolysaccharide		chemical drug	Inhibited	-4.678	7.65e-14	ANXA3,ANXA5,APOBEC3B,APP,ARPC1B,ATP1A1,BAMBI,BCL10,BIRC2,BIRC3,Calm1 (includes others),Casp12,CD14,CD2AP,CD63,CD81,CD9,CDKN1A,CHUK,CP,CRYAB,CSF1,CTSV,CXADR,CXCL16,CYB5A,CYBA,EDN1,EHF,ENPP2,F3,FOXA2,FSTL1,GCLC,GSN,HLA-A,HSPA4L,HSPB1,IER3,IGF1,IGFBP5,ISG15,ITGA3,JUN,JUNB,JUND,KLF6,LASP1,LDHA,LGALS1,Ly6a (includes others),MARCKSL1,Mt1,Mt2,MYH14,NFAT5,NFKB2,NFKBIA,NGF,PFKP,PKM,PPIA,PRDX5,PSME2,PTGFR,…	234 (16)
TGFB1		growth factor	Inhibited	-3.961	1.33e-13	ACSL3,AHNAK,ALDOA,ANKRD1,ANXA11,APP,BAMBI,BSG,Calm1 (includes others),CALML4,CAPNS1,CD14,CDH4,CDKN1A,CLDN4,CLU,CNN3,CSF1,CSRP1,CSRP2,CTSH,CTTN,CXADR,CYBA,DAD1,DAPK1,DNAJB4,DYNLL1,EDN1,EEF1A1,EPCAM,F3,FOXA2,FOXJ1,GCLC,GSN,HSPB1,HSPG2,IER3,IGF1,IGFBP5,IGFBP7,ITGA3,JUN,JUNB,JUND,KRT18,KRT19,KRT7,LASP1,LDHA,Ly6a (includes others),MYL12A,MYL6,MYOF,NFAT5,NFKBIA,NGF,NME1,PAK3,PDLIM4,PDPN,PDXK,PDZK1IP1,P…	216 (21)
RICTOR		other	Activated	4.514	4.31e-13	BSG,CDC42EP5,COX7A2L,ISG15,MRPL13,PSME2,RPL10,RPL10A,RPL12,RPL14,RPL22,Rpl23a,RPL4,RPL6,RPL7,RPL8,RPLP0,RPS11,RPS2,RPS21,RPS24,RPS26,RPS29,RPS4Y1,RPS5,RPS6,RPS9,RPSA,Uba52,UQCR10	189 (7)
methylprednisolone		chemical drug		-0.083	4.52e-13	ALDH1A1,ANXA3,ATP1A1,B4GALNT1,Calm1 (includes others),CD9,CDKN1A,CLDN7,CNN3,COMT,CTSH,CTSV,DUSP6,DYNLL1,ENPP2,F3,FOXA2,FSTL1,GCLC,IGF1,JUN,KRT19,Ly6a (includes others),ME1,Mt1,NME1,NPM1,NUDT4,PSME2,SDC4,SERPINB9,SH2D4A,SIRPA,SPARC,TAPBP,TIMP3,TINAGL1,TOB1,TP53,Uox,USP2,ZFP36L1	200 (18)
EGF		growth factor		-1.741	3.05e-12	BIRC2,CDC42EP1,CDH4,CDKN1A,CLDN2,CLDN7,CLU,DAD1,DUSP6,EDN1,EEF1A1,EPCAM,ERRFI1,F3,FOXA2,FOXJ1,FSTL1,IER3,IGF1,IGFBP5,JUN,JUNB,JUND,KRT19,LDHA,NGF,PDPN,PPIB,RALA,RHOB,S100A10,SOX4,SPARC,SPHK1,SPP1,ST3GAL4,TF,TGFB3,TIMP3,TNFRSF12A,TP53	232 (20)
5-fluorouracil		chemical drug		-0.335	3.68e-12	ALDOA,BIRC2,CAPNS1,CD81,CDKN1A,CLU,FXYD3,GSN,HSPA4L,JUN,LDHA,PKM,PSME2,PTGES3,RHOB,RPL10,RPL10A,RPL15,RPL27A,RPL5,RPL6,RPL7,RPS12,RPS15A,RPS27L,RPS28,RPS29,RPS4Y1,SPHK1,TNFRSF12A,TP53,ZFP36L1	216 (17)
tretinoin		chemical - endogenous mammalian		-1.255	6.11e-12	AHNAK,ALDH1A1,ANXA5,APP,BAMBI,BIRC2,BIRC3,CA8,Calm1 (includes others),CD14,CD47,CD63,CD9,CDKN1A,CLDN10,CP,CYP2S1,DAD1,DBI,DDAH2,DYNLL1,EDN1,EEF1A1,ENPP2,EPCAM,ERRFI1,F3,GPX1,HLA-A,HSPA2,HSPB1,IER3,IGF1,IGFBP5,IGFBP7,ISG15,ITM2B,JUN,KRT18,KRT19,KRT7,LGALS1,Ly6a (includes others),LY6E,MARCKSL1,Mt1,NPM1,PDLIM4,PRDX2,RALA,RPL10,Rpl23a,RPL3,RPL4,RPL5,RPL6,RPL7,RPS12,RPS20,RPS4Y1,RPS6,RPS7,S100A10,SAMD…	233 (20)
POLG		enzyme			9.44e-12	COX7A2L,CYB5A,EEF1B2,EIF3H,RPL14,RPL27A,RPL5,RPL7,RPS24,RPS5,TPT1
JUN	-0.396	transcription regulator	Inhibited	-2.735	1.07e-11	APP,BIRC2,BIRC3,CAPNS1,CD14,CDKN1A,CLDN2,CLU,COMT,Crip2,CSF1,CXCL16,DUSP6,EDN1,F3,FOXA2,GCLC,IGFBP7,JUN,JUNB,NFKB2,NFKBIA,NGF,PAK3,RELB,RHOB,S100A10,SERPINB9,SFTPD,SPARC,SPHK1,SPP1,STMN1,TF,TIMP3,Tmsb4x (includes others),TP53,TXN	248 (20)
IL3		cytokine		-1.89	1.58e-11	BIRC3,Calm1 (includes others),CD14,CD63,CDKN1A,CSF1,CTTN,DAD1,EEF1A1,FKBP3,GPX1,HLA-A,HSPA2,JUN,JUNB,Mt1,PDPN,RALA,RPL10,Rpl23a,RPL3,RPL4,RPL5,RPL6,RPL7,RPS12,RPS20,RPS4Y1,RPS6,RPS7,SOX4	183 (16)
PRL		cytokine	Inhibited	-3.478	1.97e-11	ACTB,ANXA3,ANXA5,APP,CDKN1A,CLU,CNN3,CTSH,CTSV,GSTM1,IER3,IGFBP5,ISG15,JUN,KRT19,LY6E,MFGE8,PDLIM4,PDPN,PSME2,PTGFR,RPSA,SAMD9L,SPARC,SPP1,TIMP2,Tmsb4x (includes others),TP53	220 (22)
gentamicin		chemical drug	Inhibited	-2.267	2.39e-11	ACSL3,ALDH1A1,CD9,CLU,CSRP2,CTSV,EEF1A1,ENPP2,GSTM5,HSPB1,JUN,JUNB,KLF6,NME1,NPM1,NUDC,PTP4A1,Pvr,RPS27L,SPP1,TP53,TTR,TUBB,VAT1,YWHAH,ZFP36L1
APP	-0.521	other	Inhibited	-2.15	2.79e-11	ACTB,ACTG1,ALDOA,ANXA5,APP,ARL6IP5,BSG,CALML4,Casp12,CD151,CDC14A,CDKN1A,CLU,CP,CSF1,CTSV,CTTN,DBI,EDN1,ENPP2,GPM6B,HLA-E,HSPB1,HSPG2,IGF1,IGFBP5,ITGA3,JUN,JUNB,JUND,LDHA,Ly6a (includes others),Mt1,NME1,PAK3,PFKP,PKM,PPIA,PRDX2,PRDX5,RPS6,SDC4,Serpinb6b,SIRPA,STMN1,TP53,TPT1,TTR,TUBA1A,TUBB,TUBB2A,TUBB2B,TUBB4B,TXN,ZFP36L1	210 (15)
NEDD9		other	Inhibited	-3.357	5.34e-11	ANKRD37,APP,ARMC4,Ccdc30,DNALI1,DYNLRB2,ERRFI1,FHAD1,FOXJ1,KIF9,NEK5,PFKP,RSPH4A,TF,TPPP3,TUBA1A
puromycin aminonucleoside		chemical reagent	Inhibited	-2.254	7.79e-11	ACTB,ACTG1,CD14,CD2AP,CLDN4,CLU,CP,CTSV,CYBA,IER3,Pvr,RCN1,S100A10,SPP1,TNFRSF12A,TTR,TUBB
progesterone		chemical - endogenous mammalian		-1.279	9.58e-11	ACTB,AEBP1,ALDH1A1,BIRC3,BSG,CDKN1A,CLDN4,COMT,CP,CRYAB,CSF1,CTSV,DNAJB4,ENPP2,ERRFI1,F3,FKBP3,GSTA3,Gstt1,HSPA2,IGF1,IGFBP5,JUN,KRT7,LDHA,LGALS1,ME1,Muc1,NFKBIA,PDPN,PDZK1IP1,PKM,RAB27B,SPHK1,SPP1,ST3GAL4,TGFB2,TGFB3,TIMP3,TP53,TTR,WFDC2	240 (21)
IKBKG		kinase	Inhibited	-2.306	1.31e-10	AEBP1,BIRC3,CLU,CP,CSF1,DUSP6,ENPP2,Gstt1,HLA-A,ISG15,JUNB,Mt1,Mt2,NFKB2,NFKBIA,NGF,RELB,SEMA3C,TMEM176B	196 (16)
IFNG		cytokine	Inhibited	-3.766	1.48e-10	ACTB,AGRN,APP,ARL6IP5,ATP1A1,BIRC2,BIRC3,Casp12,CD14,CD63,CDKN1A,CP,CSF1,CTSH,CTSV,CXADR,CXCL16,CYB5A,CYBA,DAPK1,EDN1,EEF1A1,EHF,F3,FLRT2,GLIPR2,HLA-A,HLA-E,HSPB1,HSPG2,IER3,IGF1,ISG15,JUN,JUNB,JUND,KCNQ1OT1,KLF6,KRT19,LDHA,Ly6a (includes others),LY6E,MARCKSL1,Mt1,MYH10,NFE2L3,NFKB2,NFKBIA,NGF,PKM,PPIA,PRDX2,PSME2,RAB36,RELB,RHOB,S100A10,SDC4,SERPINB9,SPP1,SYT7,TAPBP,TAPBPL,TGFB2,TIMP3,TIMP4,TMOD…	205 (14)
methapyrilene		chemical drug	Inhibited	-2.324	1.48e-10	ACTG1,ALDOA,AMBP,ANXA5,CP,CTSV,DBI,EEF1A1,ENPP2,GCLC,GSTM1,IGF1,Mt1,Pvr,RPS9,STMN1,TP53,TTR,TUBB
bromobenzene		chemical toxicant		1.078	2.27e-10	CDKN1A,CTSV,GCLC,GSTM1,Gstt1,HSPB1,JUN,JUND,Mt1,Mt2,RPL22,TUBA1A,TUBB2B,YWHAQ
FOS	0.458	transcription regulator		-1.68	3.14e-10	ACTG1,ARPC5,CD14,CLDN2,CLU,CTSH,CTSV,CXCL16,EDN1,F3,FLRT2,FSTL1,IGFBP5,JUN,JUNB,KLF6,Mt2,NFKB2,NGF,PDPN,PTP4A1,RAP1GAP,RPL39,RPLP0,RPS24,RPS6,RPS7,RPS9,S100A10,SERPINB9,SFTPD,SIRPA,SPHK1,SPP1,STMN1,TP53,TUBB,TXN,Uba52	210 (16)
forskolin		chemical toxicant		-1.638	3.7e-10	ACTB,ALDOA,APP,ARL6IP5,BAMBI,CD14,CD9,CDKN1A,CLU,Crip2,CRYAB,CSF1,CTSV,CTTN,DAPK1,DUSP6,EDN1,ERRFI1,GSTM5,HSPA2,IER3,IGF1,IGFBP5,ITGA3,JUN,JUNB,JUND,KRT18,MFGE8,Mt1,Mt2,NFKBIA,NGF,PDXK,PRDX2,PTP4A1,Pvr,RHOB,RPS11,RPS20,S100A10,SPP1,TM4SF1,TP53,TUBA1A	209 (17)
carbon tetrachloride		chemical toxicant		-1.608	3.9e-10	Calm1 (includes others),CDKN1A,DCLK1,GCLC,GSTM1,HSPB1,IGF1,IGFBP5,JUN,JUNB,JUND,ME1,Mt1,Mt2,PDGFD,PTP4A1,SPHK1,SPP1,TF,TGFB2,TIMP2,TIMP3,TNFRSF12A	205 (21)
F2		peptidase	Inhibited	-3.721	8.99e-10	BIRC2,BIRC3,BSG,CD63,CDC42EP1,CDKN1A,CLU,EDN1,ERP29,F3,IER3,IGF1,IGFBP5,JUN,JUNB,KLF6,NFKBIA,RELB,RHOB,SAMD4A,SDC4,TGFB2,TGFB3,TIMP2,TNFRSF12A	199 (13)
cisplatin		chemical drug	Inhibited	-2.239	1.2e-09	ACTB,ALDH1A1,ANKRD1,ANXA5,BIRC2,BIRC3,C9orf116,Casp12,CD14,CDKN1A,CLDN4,CLU,CP,CSF1,DNAH5,DUSP6,EDN1,ENDOG,F3,GSTM1,HSPA4L,IER3,JUN,JUND,KRT19,MLF1,Mt1,NFKBIA,PPIA,Pvr,RAB27B,RCN1,RPS21,RPS27L,RPS5,RPS9,S100A10,SPP1,STMN1,TIMP3,Tmsb4x (includes others),TNFRSF12A,TOB1,TP53,TUBB,USP2	223 (17)
nitric oxide		chemical - endogenous mammalian		0.119	1.7e-09	APP,BIRC2,CDKN1A,CTSH,DUSP6,EDN1,GCLC,GSTM1,HSPG2,IER3,JUN,JUNB,Mt1,Mt2,PRDX5,SPP1,TIMP2,TIMP3,TP53	219 (17)
hydrogen peroxide		chemical - endogenous mammalian		-1.955	1.99e-09	AEBP1,ANKRD1,APP,BIRC3,BSG,CD63,CD81,CDKN1A,CLDN7,CLU,CRYAB,CSF1,DDAH2,EDN1,EEF1A1,EEF1B2,ENPP2,GCLC,GPX1,ITGA3,JUN,KCNQ1OT1,NEK1,NGF,PAH,PRDX2,RAB36,RCN1,RPL5,SPARC,SPP1,STMN1,TP53,TUBB2A,TXN	211 (17)
4-hydroxytamoxifen		chemical drug	Inhibited	-2.926	2.74e-09	CAPNS1,CDKN1A,CLDN4,CLU,DYNLL1,EDN1,EFEMP1,ERRFI1,IER3,IGF1,JUN,JUNB,KRT19,NFKBIA,SERPINB9,SPHK1,TM4SF1,TMOD1,TP53,TUFT1	203 (18)
mercuric chloride		chemical toxicant			2.84e-09	CDKN1A,GCLC,GSTM1,HSPB1,JUN,JUNB,Mt1,Mt2,SPP1,TXN	201 (16)
PDGF BB		complex		-1.922	3.15e-09	ANXA11,CDKN1A,CP,CRYAB,CSF1,CSRP2,DUSP6,EDN1,F3,HLA-E,IER3,IGF1,JUN,JUNB,KLF6,Mt1,Mt2,Pvr,RHOB,RPS6,SPHK1,SYNE1,TGFB3,TNFRSF12A,TOB1,TP53,ZFP36L1	212 (22)
SMARCA4		transcription regulator		-1.519	3.93e-09	AHNAK,BAMBI,CD47,CD63,CDKN1A,CLDND1,CP,CPM,CSF1,CTSH,DUSP6,EHF,F3,FMO2,FOXA2,GCLC,GPX1,GSTO1,HLA-E,IER3,IGF1,IGFBP5,IGFBP7,ITGA3,JUN,KRT18,LGALS1,MFGE8,Mt1,NFKB2,PTP4A1,SPHK1,SPP1,TAPBPL,TGFB2,TIMP2,TP53,TTR,TUBB	235 (19)
MAPT		other			4.79e-09	AARS1,ACTB,ACTG1,ALDOA,ANXA5,APP,BSG,CDKN1A,DBI,GPM6B,GSTM5,HSPA4L,JUN,NFKB2,NME1,PAK3,PKM,PPIA,PRDX5,RPLP0,STMN1,SYNE1,TPT1,TUBA1A,TUBB,TUBB2A,TUBB2B,TUBB4B,TXN	196 (9)
thioacetamide		chemical toxicant	Inhibited	-3.893	6.51e-09	BIRC3,CD14,CLDN4,CLU,CP,CSRP2,FSTL1,IER3,IGF1,JUN,LGALS1,PDGFD,PKM,PRELP,Pvr,RCN1,S100A10,SPARC,SPP1,TGFB3,TIMP2,TNFRSF12A,USP2	217 (14)
NR3C1	-0.252	ligand-dependent nuclear receptor		-1.327	7.18e-09	ACTB,APP,BCL10,BIRC2,BIRC3,CD47,CDKN1A,COMT,CRYAB,DAD1,DBI,DYNLL1,EDN1,ENDOG,ERRFI1,F3,GPX1,IER3,IFT122,IGF1,ISG15,JUN,JUND,MLF1,Mt1,NFKB2,NFKBIA,NME5,PDPN,RHOB,SEMA3C,SERPINB9,SOX4,SPP1,TIMP3,TNFRSF12A,TP53,TSC22D3,TXN,Uox,YWHAH	251 (18)
mibolerone		chemical drug		-0.5	7.81e-09	AHNAK,CLU,DAD1,DBI,ERP29,F3,HLA-E,IGF1,JUN,NME1,PPIA,PPIB,PRELP,STMN1,TF,TIMP3,TUBA1A
poly rI:rC-RNA		biologic drug	Inhibited	-3.278	8.17e-09	ACSL3,AGRN,ARMC4,BIRC2,BIRC3,Casp12,CD14,CD47,CDC14A,COX7A2L,CSF1,EDN1,EHF,HLA-A,HLA-E,IGF1,IQGAP2,ISG15,JUN,JUNB,KLF6,KRT19,LY6E,NFKB2,NFKBIA,Oasl2,PSME2,RELB,RPL10A,RPL12,RPL15,Rpl23a,RPL3,RPS2,RPSA,SDC4,SFTPD,SFXN2,TP53	197 (16)
PD98059		chemical - kinase inhibitor		1.677	8.44e-09	ALDOA,ANKRD1,APOBEC3B,CD14,CDC42EP1,CDKN1A,CLU,CTSH,DUSP6,EDN1,EEF1A1,ERRFI1,F3,HPCAL1,IER3,IGF1,JUN,JUNB,JUND,KRT19,LDHA,NGF,RPS2,RPS6,S100A10,SIRPA,SPP1,ST3GAL4,TF,TGFB3,TIMP2,TP53,TSC22D3,TUBB2A,TXN,ZFP36L1	213 (19)
ESR1		ligand-dependent nuclear receptor		1.377	8.99e-09	AHNAK,ANXA3,BIRC3,CALML4,CDKN1A,CLDN2,CLDN4,CLIC6,COMT,CP,CPM,CXADR,EDN1,EFEMP1,ENPP2,EPCAM,F3,GSN,HLA-E,HSPA2,IER3,IGF1,IGFBP5,JUN,JUNB,JUND,KRT19,KRT7,LGALS1,MAN1A1,MYH10,NEK1,NFAT5,NFE2L3,NFKB2,NFKBIA,NME1,ODF3B,PDGFD,PHB,RALA,RELB,SEMA3C,SERPINB9,SLC39A4,SOX4,SPP1,TAPBP,TGFB2,TGFB3,TIMP2,TM4SF1,TMOD1,Tmsb4x (includes others),TNIP1,TNS3,TOB1,TP53,TSC22D3,TTR,UBXN10,UGT2B7,UQCR10,WASF2	198 (20)
doxorubicin		chemical drug	Inhibited	-2.528	9.07e-09	APP,BIRC2,BIRC3,C9orf116,CD14,CD47,CDKN1A,CLDN4,CLU,CP,EDN1,EEF1A1,EEF1B2,F3,GCLC,IER3,IGFBP7,JUN,KRT18,NFKBIA,Pvr,RCN1,S100A10,SPHK1,SPP1,STMN1,TGFB3,TNFRSF12A,TP53,TUBB,TXN	207 (17)
IGF1R	0.373	transmembrane receptor		-1.007	1.11e-08	ALDOA,ANKRD1,ANXA3,APP,CAPG,CDKN1A,CLU,EDN1,IGF1,IGFBP5,KRT19,LASP1,NME1,PKM,RPL10A,RPL3,RPL7,RPS21,RPS24,RPS26,SDC4,TIMP3,TP53,TXN	223 (16)
TCR		complex	Inhibited	-2.584	1.13e-08	ALDOA,BIRC3,BSG,ISG15,JUN,JUNB,NFE2L3,NFKB2,NFKBIA,NME1,PHB,RELB,RPL10A,RPL15,RPL22,RPL3,RPL4,RPL5,RPL6,RPL7,RPLP0,RPS2,RPSA,SPHK1,SPP1,TNFRSF12A,TOB1,TSC22D3	145 (17)
lomustine		chemical drug	Inhibited	-3.464	1.16e-08	BIRC3,CD14,CLDN4,CLU,CP,IER3,Pvr,RCN1,S100A10,SPP1,TNFRSF12A,TUBB
uranyl nitrate		chemical toxicant		-1.871	1.18e-08	Calm1 (includes others),CSRP1,FKBP3,IGFBP7,Mt2,NUDT19,PRDX2,RPL10A,RPL7,RPS24,RPS26,RPS29,SPP1,TPT1,Uba52
PGR		ligand-dependent nuclear receptor		-1.481	1.28e-08	BIRC2,BIRC3,CDKN1A,CLDN7,COMT,CSRP1,DNAJB4,DYNLL1,EDN1,F3,HPCAL1,HSPA2,IER3,IGFBP5,KRT18,NFKBIA,PFKP,PTP4A1,RAB27B,RHOC,ST3GAL4,TGFB3,TM4SF1,TSC22D3	206 (18)
ST1926		chemical drug	Activated	2.125	1.32e-08	ACTB,CDKN1A,COX7A2L,DYNLL1,ITM2B,LGALS1,NME1,NPM1,RPL10,RPL39,RPL6,RPL8,RPS2,RPS26,SOX4,TP53,TPT1,TXN
triamterene		chemical drug	Inhibited	-3.434	1.4e-08	BIRC3,CD14,CLDN4,CLU,CP,IER3,Pvr,RCN1,S100A10,SPP1,TNFRSF12A,TUBB
SOD1		enzyme			1.46e-08	ACTB,APP,ATP1A1,Casp12,CD14,CLU,COMT,CP,CRYAB,GCLC,GSTM1,GSTM5,HPCAL1,HSPB1,IGF1,JUN,JUNB,Mt1,Mt2,SPP1,STMN1,Tmsb4x (includes others),TP53	236 (15)
PPP3CA		phosphatase			1.68e-08	APP,CD9,CDKN1A,CRYAB,CSRP1,CTSV,KRT18,PDPN,PRDX5,PTGFR,SDC4,SPP1,TF	156 (7)
MTPN	0.276	transcription regulator	Inhibited	-2.109	1.96e-08	Calm1 (includes others),Casp12,CP,EDN1,IGF1,JUN,Mt1,S100A10,SPARC,SPP1,TGFB2,TGFB3,TUBA1A
U0126		chemical - kinase inhibitor		0.833	2.09e-08	BIRC3,CDKN1A,CLDN2,CLDN4,CRY2,DUSP6,EDN1,EEF1A1,EHF,ENPP2,EPCAM,ERRFI1,F3,GCLC,GSN,IER3,ITGA3,JUN,JUNB,JUND,ME1,PRELP,RPS6,SIRPA,SPP1,SPRY1,TF,TGFB2,TGFB3,TIMP2,TIMP3,TP53,TSC22D3,TXN	203 (19)
fenamic acid		chemical reagent	Inhibited	-3.429	2.36e-08	BIRC3,CD14,CLDN4,CLU,CP,IER3,Pvr,RCN1,S100A10,SPP1,TNFRSF12A,TUBB
raloxifene		chemical drug		-0.291	3.08e-08	ANXA3,CDKN1A,CLU,CSF1,CTSH,DYNLL1,ENPP2,IER3,IGF1,JUN,KLF6,KRT7,RAP1GAP,SPP1,TGFB2,TGFB3,TIMP3,TM4SF1	222 (17)
AGT		growth factor	Inhibited	-3.016	3.24e-08	ANXA3,ATP1A1,Calm1 (includes others),CD14,CDKN1A,CP,CREB5,CYBA,DDAH2,EDN1,EFEMP1,ERRFI1,F3,GSTA3,GSTM5,HSPB1,HSPG2,IGF1,IGFBP5,JUN,MYH10,NFKB2,NFKBIA,NGF,PTGFR,RRAS,SOX4,SPP1,TGFB2,TGFB3,TNFRSF12A,TP53	200 (15)
CDK4/6		group	Activated	2.309	3.29e-08	AHNAK,CLIC6,EEF1B2,ERRFI1,HSPB1,LASP1,PDLIM4,RCN1,RPL10,RPL27A,RPS6,TUBB
HTT		transcription regulator		-0.822	3.59e-08	AGRN,ALDOA,APP,ATP1A1,BIRC2,CALML4,CD9,CDKN1A,CHUK,CLDN6,CLIC6,CRYAB,CTTN,DUSP6,EEF1A1,ENPP2,GCLC,GSN,HPCAL1,IGFBP5,JUN,JUNB,LDHA,MAN1A1,Mt1,PDLIM4,PDXK,PRELP,RAP1GAP,RPS29,SIRPA,SPP1,STMN1,TESC,TIMP3,TM4SF1,Tmsb4x (includes others),TP53,TUBB,USP2	247 (20)
vancomycin		biologic drug	Inhibited	-2.893	4.7e-08	BIRC3,CD14,CLDN4,CLU,CP,FMO2,IER3,Pvr,RCN1,S100A10,SPP1,TNFRSF12A,TUBB
cadmium chloride		chemical toxicant		-0.181	5.14e-08	ANXA5,GCLC,GSTM1,HSPB1,JUN,Mt1,Mt2,SLC5A1,TGFB3,TP53,TXN	202 (21)
estrogen receptor		group		-0.951	6.18e-08	CAPG,CDH4,CLDN4,EDN1,IGF1,ITGA3,JUN,KRT18,KRT19,KRT7,LY6E,MAN1A1,PDGFD,SPARC,TGFB2,TGFB3,TIMP2,TIMP3,TIMP4,TP53,TSC22D3	192 (21)
ERBB2		kinase		0.069	7.92e-08	ACTB,AHNAK,AIMP2,BCAM,BIRC3,CD47,CD9,CDKN1A,CHCHD10,CHUK,CLDN4,CLDN7,CLU,CPM,CRIP1,DUSP6,EDN1,EHF,EPCAM,F3,FSTL1,FXYD3,GPM6B,HSPB1,IGFBP5,JUN,JUNB,KRT7,LDHA,LGALS1,MAN1A1,NFKB2,PDGFD,PDLIM4,PRDX2,RHOB,SIRPA,SOX4,SPARC,ST3GAL4,ST3GAL6,TAPBP,TIMP3,Tmsb4x (includes others),TP53,TUBA1A,UQCR10	204 (20)
FGF1		growth factor		1.015	8.55e-08	CDKN1A,DUSP6,EDN1,GCLC,GPX1,GSTM1,GSTM5,JUN,RHOU,SPP1,TGFB2,TGFB3,TIMP3,TNFRSF12A,TTR	188 (18)
gentamicin C		chemical drug	Inhibited	-3.317	1.03e-07	BIRC3,CD14,CLDN4,CLU,CP,IER3,Pvr,S100A10,SPP1,TNFRSF12A,TUBB
TWIST1		transcription regulator		-0.665	1.22e-07	ALDH1A1,CDKN1A,CLDN4,CLU,EPCAM,GSN,IGFBP5,MFGE8,PAMR1,RELB,RHOC,SPHK1,SPP1,TF,TGFB2,TIMP3,TP53	209 (17)
camptothecin		chemical drug		-1.346	1.45e-07	ALDOA,BAMBI,BIRC2,BIRC3,CD47,CDKN1A,CSF1,DUSP6,EDN1,EEF1A1,EEF1B2,F3,FKBP3,HLA-A,HLA-E,IQGAP2,JUN,MARCKSL1,Mt1,NFKB2,NFKBIA,PPIA,PTP4A1,RCN1,RPL3,SDC4,SERPINB9,SPP1,SYNE1,TNS3,TOB1,TP53,TUBB,TUBB2A,ZFP36L1	186 (15)
EGFR		kinase		0.029	1.55e-07	ACTB,APP,BCAM,BCL7C,CD47,CD63,CDKN1A,CLDN2,CPM,CRYAB,EPCAM,F3,GPM6B,HSPB1,IER3,IGF1,IGFBP5,IQGAP2,IQUB,JUN,JUNB,JUND,NFKBIA,NUDC,PKM,PPIA,RHOB,RRAS,SPHK1,ST3GAL4,TUBB4B	232 (18)
FGF2		growth factor		-1.712	1.61e-07	BAMBI,CDKN1A,CRYAB,CSF1,DAD1,DUSP6,ENPP2,EPCAM,ERRFI1,F3,IGF1,IGFBP5,ITGA3,JUN,JUNB,Pvr,S100A10,SPARC,SPHK1,SPP1,SPRY1,ST3GAL4,TF,TGFB2,TIMP3,Tmsb4x (includes others),TNFRSF12A,TP53	200 (18)
KITLG		growth factor			1.73e-07	ACTB,CD14,CDC42EP5,CDKN1A,CLU,CSF1,DALRD3,EEF1A1,LY6E,NFKBIA,NPM1,PKM,PTGES3,RPL7,RPLP0,RPS6,RPS7,ST3GAL4,Tmsb4x (includes others),TPT1,TSC22D3	175 (10)
allopurinol		chemical drug	Inhibited	-2.874	1.73e-07	BIRC3,CD14,CLDN4,CLU,CP,F3,IER3,Pvr,RCN1,S100A10,SPP1,TNFRSF12A,TUBB	176 (17)
OSM		cytokine		-1.405	2.13e-07	AADAC,ACSL3,ANXA3,BAMBI,BCL10,CDKN1A,CLDN4,CPM,CTSH,CTSV,CXADR,DAPK1,EPCAM,F3,HLA-A,HSPA2,IER3,JUN,JUNB,KRT19,Mt2,MYH10,PDPN,PDZK1IP1,PRDX2,PTP4A1,SPP1,SYNE1,TAPBP,TIMP3,TM4SF1,TP53,TUBA1A	214 (19)
carboplatin		chemical drug	Inhibited	-2.945	2.27e-07	CD47,CLDN4,CLU,CP,IER3,Pvr,SPP1,TNFRSF12A,TP53,TUBB	142 (7)
IGF1	-0.905	growth factor		-1.491	2.49e-07	APP,BIRC3,BSG,CDKN1A,CLU,CSF1,CYBA,DCLK1,DUSP6,EDN1,ERRFI1,F3,IER3,IGF1,IGFBP5,ITGA3,JUN,JUNB,KLF6,LASP1,LDHA,Ly6a (includes others),NFKBIA,PDXK,PKM,SPP1,TF,TNFRSF12A,TP53,ZFP36L1	162 (19)
selenomethylselenocysteine		chemical - endogenous mammalian		1.89	2.55e-07	ATP1A1,CLU,JUN,RPS11,RPS12,TIMP2,TIMP3	86 (7)
actinomycin D		biologic drug		0.903	2.63e-07	ACTB,APP,ATP1A1,BCL10,BIRC2,BIRC3,CDKN1A,EDN1,ERRFI1,F3,GSTM5,IGFBP5,JUN,Mt1,NGF,NPM1,SPHK1,SPP1,TF,TP53	151 (14)
CCND1		transcription regulator		0.073	2.72e-07	AHNAK,CDKN1A,CLIC6,COL27A1,EEF1B2,ENPP2,ERRFI1,HSPB1,IER3,LASP1,MNS1,PAH,PDLIM4,RCN1,RPL10,RPL27A,RPS6,SERF2,SOX4,SPP1,STBD1,TGFB3,TP53,TUBB	195 (16)
indomethacin		chemical drug	Inhibited	-2.855	3.01e-07	APP,BIRC3,BSG,CD14,CDKN1A,CLDN4,CLU,CP,DYNLL1,IER3,IGF1,Pvr,RCN1,RPS21,RPS28,S100A10,SPP1,TNFRSF12A,TUBB,UQCR10	197 (18)
lactacystin		chemical - protease inhibitor		0.027	3.12e-07	ACTB,APP,ATP1A1,CD9,CDKN1A,CRYAB,CYB5A,GCLC,HLA-A,HSPB1,IGFBP5,NFKBIA,PPIA,RPLP0,STMN1,TP53,TUBB2A,TXN	234 (19)
IgG		complex		1.878	3.24e-07	APP,CD9,CDKN1A,CLDN4,CSF1,EDN1,GPX1,HLA-E,HSPB1,ISG15,JUND,KRT18,LGALS1,Ly6a (includes others),NGF,PDPN,TAPBP,TOB1,TUBB2A	243 (16)
TNFSF11		cytokine	Inhibited	-4.273	4.19e-07	BSG,CD14,CDKN1A,CSRP1,F3,GCLC,IER3,IGF1,JUN,JUNB,MARCKSL1,NFKB2,NFKBIA,RELB,RHOB,RRAS,SDC4,SERPINB9,SPP1,STMN1,TNIP1	199 (13)
CD 437		chemical drug		1.627	4.84e-07	ALDOA,CDKN1A,COX7A2L,F3,ITM2B,JUN,LGALS1,NFKBIA,NME1,NPM1,RPL10,RPL39,RPL8,RPS2,SOX4,TP53,TUBA1A,TXN	199 (17)
IL4		cytokine		-1.635	4.85e-07	ACTB,ACTG1,AHNAK,B4GALNT1,BIRC2,CAPG,CD14,CDKN1A,CLDN2,CRIP1,CSF1,CXCL16,CYB5A,EFHD2,F3,FLRT2,FOXA2,GLIPR2,GPM6B,IER3,IGF1,ISG15,JUN,JUNB,JUND,KLF6,LGALS1,Ly6a (includes others),MYOF,NFKB2,NFKBIA,PFKP,PHB,RPS6,S100A10,SAMD4A,SIRPA,SPHK1,SPP1,TAPBP,TGFB3,TIMP2,TIMP3,TINAGL1,TMEM176B,TP53,USP2	212 (14)
PSEN1		peptidase		-0.333	4.99e-07	ACTB,ACTG1,ALDOA,APP,BSG,Casp12,CD9,DBI,ENPP2,GPM6B,HLA-E,IGF1,NME1,PAK3,PKM,PPIA,PRDX5,STMN1,TP53,TPT1,TUBA1A,TUBB,TUBB2A,TUBB2B,TUBB4B,TXN	230 (17)
phenylbutazone		chemical drug	Inhibited	-3.13	5.33e-07	CLDN4,CLU,CP,IER3,Pvr,RCN1,S100A10,SPP1,TNFRSF12A,TUBB	87 (7)
cyclosporin A		biologic drug		0.489	5.37e-07	APP,ATP1A1,BIRC3,CD14,CDKN1A,CLDN4,CLU,CP,CYBA,EDN1,F3,IER3,IQGAP2,JUN,MYH10,NFAT5,NFKBIA,NME1,PKM,PPIA,S100A10,SPHK1,SPP1,SYT7,TNFRSF12A,TP53,TUBB,YWHAH	209 (15)
FOXA2	0.45	transcription regulator		-0.676	5.98e-07	BIRC2,CFAP126,CLDN4,CPM,DYNLRB2,EFHD2,EPCAM,FOXA2,IGF1,IGFBP5,ITGA3,MLF1,Mt1,NFKB2,PIFO,PKM,SFTPD,TF,TTR	86 (7)
1,2-dithiol-3-thione		chemical reagent		0.036	6e-07	ACTG1,ALDOA,ATP1A1,B4GALNT1,DAD1,DYNLL1,ERP29,GCLC,GSTA3,GSTM1,GSTM5,LY6E,PPIB,RPLP0,S100A13,TTR,TXN,Uox	27 (2)
COMMD1	-0.253	transporter		0.447	6.79e-07	ALDOA,BIRC3,KRT19,LDHA,NFKBIA,PFKP,TF	134 (7)
TP63		transcription regulator		-0.19	6.98e-07	APOBEC3B,CDKN1A,CTXN1,DUSP6,F3,FOXA2,FSD1L,IER3,IFT74,IGFBP7,ITGA3,JUN,JUNB,KLF6,KRT7,MFGE8,MLPH,NFE2L3,RELB,SOX4,STMN1,SYT7,TGFB2,TGFB3,TIMP3,TINAGL1,TP53,TUBB2B,WFDC2	219 (20)
desmopressin		biologic drug		-0.135	7.88e-07	ACTB,AHNAK,ATP1A1,CAPG,CYBA,MYH10,NFAT5,PPIA,RAP1GAP,TUBB,YWHAH,YWHAQ
2-bromoethylamine		chemical reagent	Inhibited	-2.985	8.42e-07	CD14,CLDN4,CLU,CP,IER3,S100A10,SPP1,TNFRSF12A,TUBB
miR-1-3p (and other miRNAs w/seed GGAAUGU)		mature microRNA	Activated	2.027	8.95e-07	AGRN,Calm1 (includes others),CNN3,CSRP1,FSTL1,IGF1,LASP1,PPIB,RABGAP1L,RABL2A,SDC4,SH2D4A,SPHK1,SYNE1,TIMP3,Tmsb4x (includes others),YWHAQ
amino acids		chemical - endogenous mammalian		-0.41	9.13e-07	ACTB,FOXA2,IGF1,JUN,JUNB,RPS20,RPS6	213 (16)
glutamyl-Se-methylselenocysteine		chemical - endogenous mammalian		1.633	9.46e-07	ATP1A1,CLU,JUN,RPS11,TIMP2,TIMP3
WNT1		cytokine		-1.562	9.62e-07	CDKN1A,EDN1,EEF1A1,ENPP2,IGF1,JUN,JUNB,KRT19,LY6E,RHOU,RPS6,SEMA3C,SPP1,TP53	225 (21)
calcitriol		chemical drug		-0.916	9.76e-07	APP,BIRC2,CD14,CDKN1A,COMT,CSF1,EDN1,EHF,ERRFI1,F3,FOXA2,IER3,IGF1,IGFBP5,ISG15,JUN,KRT23,LGALS1,Ly6a (includes others),NFKBIA,NGF,PRDX5,PTGFR,RAB32,SERPINB9,SPP1,STMN1,TF,TGFB2,TP53,TXN,WSB1	170 (19)
N4BP1		other		0.554	1.02e-06	HLA-A,JUN,JUNB,NFKB2,RELB	168 (11)
ZBED1		enzyme			1.02e-06	CHD3,RPL10A,RPL12,RPS6
NFE2L2		transcription regulator		0.441	1.03e-06	ACTG1,ALDOA,ATP1A1,B4GALNT1,Calm1 (includes others),CDKN1A,DAD1,DYNLL1,ERP29,GCLC,GPX1,GSTA3,GSTM1,GSTM5,GSTO1,Gstt1,LY6E,ME1,Mt1,NFE2L3,PPIB,RPLP0,S100A13,TP53,TTR,TXN,Uox
CX3CR1		G-protein coupled receptor		0.434	1.13e-06	ANXA5,APP,CCDC39,CD14,CEP83,CRYAB,DYNC2H1,GSTO1,IGF1,MFGE8,PKHD1,RFX3,TF,TUBB2A,TUFT1,WDR78	94 (7)
Ins1		other		-1.923	1.17e-06	ACTB,ATP1A1,CDKN1A,CRYAB,CYB5A,DYNLL1,EDN1,ERP29,ERRFI1,FOXA2,IGF1,IGFBP5,JUN,JUNB,LDHA,Mt1,NGF,PPIB,SPARC,TF,TIMP2,TIMP3	183 (18)
RELA	-0.27	transcription regulator	Inhibited	-3.4	1.22e-06	ANKRD1,APP,BCL10,BIRC2,BIRC3,CD14,CDC14A,CDKN1A,CRYAB,CTTN,EDN1,EHF,EPCAM,F3,IER3,IGF1,ISG15,JUN,JUNB,KRT18,NFKB2,NFKBIA,PKM,RELB,SDC4,TAPBP,TNIP1,TP53	221 (16)
SB203580		chemical - kinase inhibitor	Activated	2.039	1.22e-06	ANXA3,APOBEC3B,CD2AP,CD47,CDKN1A,CRYAB,CTSH,EFEMP1,EHF,ERP29,F3,IER3,ISG15,JUN,JUNB,JUND,KRT23,NFKB2,S100A10,Serpinb6b,SERPINB9,SPARC,SPP1,TGFB2,TGFB3,TIMP2,TIMP3,TP53	217 (17)
estrogen		chemical drug		-0.445	1.27e-06	CDKN1A,CLU,COMT,CRY2,FOXA2,Ifi27,IGF1,IGFBP5,JUN,JUNB,LGALS1,NME1,SCX,SERPINB9,SFTPD,SPARC,SPP1,TGFB2,TGFB3,Tmsb4x (includes others),TP53	222 (23)
SNAI1		transcription regulator		0.588	1.28e-06	ANKRD1,CDH4,CDKN1A,CLDN4,CLDN7,CTTN,CXADR,EPCAM,GSN,KRT18,LASP1,PFKP,SPARC,TF,TMOD1	183 (11)
CG		complex		-1.749	1.34e-06	ACTB,CDKN1A,CLU,CTSV,DBI,DNAH11,DUSP6,EFEMP1,ENPP2,HLA-A,IER3,IGF1,JUN,JUNB,Oasl2,PTGFR,S100A10,SDC4,SPP1,TGFB2,TIMP4,TM4SF1,TNFRSF12A,TP53	232 (19)
benzo(a)pyrene		chemical toxicant		-0.516	1.55e-06	ARL6IP5,CDKN1A,COMT,CYB5A,GCLC,GSTM1,HSPA4L,HSPB1,IER3,IGF1,JUN,ME1,Mt2,RAP1GAP,RHOC,TF,TGFB2,TP53	236 (21)
NFkB (complex)		complex	Inhibited	-3.477	1.61e-06	ANKRD1,APP,BAMBI,BIRC2,BIRC3,CAPNS1,CDKN1A,CLU,CSF1,DAD1,EDN1,EHF,EPCAM,F3,GCLC,HLA-A,HSPB1,IER3,ISG15,JUN,JUNB,KRT19,NFKB2,NFKBIA,NGF,Pvr,RELB,RRAS,SDC4,SPP1,TGFB3,TIMP2,TNIP1,TP53	173 (15)
paraquat		chemical toxicant		-0.397	1.68e-06	C9orf116,CEP290,EDN1,GCLC,GPX1,GSTA3,KLF6,MAPK15,Mt1,Mt2,NFAT5,SFTPD,TXN
EPO		cytokine		-0.943	1.76e-06	ACTB,CDKN1A,DALRD3,EDN1,EEF1A1,JUN,JUNB,LY6E,NFKBIA,NPM1,RPL7,RPLP0,RPS4Y1,RPS6,RPS7,SPP1,ST3GAL4,TF,TP53,TPT1,TSC22D3	241 (23)
Immunoglobulin		complex		-1.246	2e-06	ALDOA,APP,BCL10,BIRC3,BSG,CAPG,CD14,CD63,CSF1,CTSH,CXCL16,DUSP6,F3,FOXJ1,GPX1,HLA-A,IER3,Ly6a (includes others),NFKB2,NFKBIA,PDLIM4,PRDX5,Pvr,RCN1,RELB,RPS11,RPS6,RPS9,SIRPA,SPHK1,SPP1,TIMP4,TP53,TSC22D3,TXN	214 (16)
MRTFA		transcription regulator	Inhibited	-2.75	2.05e-06	ACTB,ACTG1,ANKRD1,ARPC1B,CD151,COMT,CTTN,CYBA,DNAJB4,EDN1,GSTM5,HLA-A,MYH10,OSCP1,RAB27B,TGFB2	42 (4)
resveratrol		chemical drug		1.306	2.07e-06	APP,BIRC3,BSG,CD14,CDKN1A,CHUK,DAPK1,DYNLL1,EDN1,F3,FOXA2,GPX1,ISG15,JUN,JUND,NFKBIA,SCX,SPHK1,SPP1,TGFB2,TP53	246 (17)
deferoxamine		chemical drug		-1.49	2.07e-06	ALDOA,APP,CD14,CD47,CDKN1A,CP,F3,IGF1,IGFBP5,JUN,LDHA,ME1,NFKB2,PKM,SPP1,TGFB2,TP53	213 (20)
IL1A		cytokine	Inhibited	-2.584	2.1e-06	ALDH1A1,APP,BIRC2,BIRC3,CDKN1A,CSF1,HSPG2,IER3,IGF1,IGFBP5,JUN,JUNB,LDHA,NFKBIA,NGF,PDZK1IP1,S100A10,SPARC,SPP1	211 (16)
mifepristone		chemical drug		-0.317	2.42e-06	CD14,CDKN1A,CLDN7,CLU,CYBA,EHF,EPCAM,F3,FOXA2,GSTM1,JUN,JUNB,Ly6a (includes others),Mt1,Muc1,NFKBIA,RAP1GAP,RHOB,RHOC,SPP1,TIMP3,TP53	223 (17)
VCAN		other		-1.291	2.42e-06	AEBP1,AGRN,Calm1 (includes others),CDKN1A,CLU,CYBA,ENPP2,F3,ITGA3,MYH10,NFKBIA,PRDX5,PRELP,TGFB3,TP53	43 (3)
cycloheximide		chemical reagent		-0.833	2.46e-06	ACTB,ALDOA,APP,BIRC3,CDKN1A,CSF1,EDN1,EEF1A1,GCLC,IGF1,IGFBP5,JUN,JUNB,JUND,LDHA,Mt1,NFKBIA,NPM1,RELB,RHOB,SPP1,TNIP1,TOB1,TP53	242 (17)
phenacetin		chemical drug	Inhibited	-2.813	2.59e-06	BIRC3,CLDN4,CLU,CP,IER3,S100A10,SPP1,TNFRSF12A
D-glucose		chemical - endogenous mammalian		-1.742	2.95e-06	AARS1,ACTB,ALDOA,ANXA3,APP,Casp12,CDKN1A,CLU,CTSV,CYBA,DBI,DIRAS2,EDN1,ENPP2,GPX1,GSN,HSPB1,IGF1,JUN,JUNB,KCNQ1OT1,LDHA,Mt1,Mt2,PFKP,PHB,PKM,PPIB,RELB,SLC5A1,SPHK1,SPP1,TGFB3,TP53	238 (17)
CD44	-0.326	other	Inhibited	-2.56	3.08e-06	ACTB,ANXA11,BCAM,BIRC2,BIRC3,CD63,CDKN1A,CLU,CTTN,CXADR,ITGA3,JUN,LGALS1,Ly6a (includes others),NFKB2,SDC4,SPP1	190 (16)
Growth hormone		group		-0.887	3.08e-06	ACTB,BPHL,CLU,COMT,FOXA2,GCLC,GSTM1,GSTM5,IER3,IGF1,IGFBP5,JUN,JUNB,NFKBIA,SPP1,TF,TGFB3,TUBA1A	218 (23)
ouabain		chemical drug		0.414	3.13e-06	ACTB,ANXA5,ATP1A1,CDKN1A,PHB,TP53,YWHAH,YWHAQ	228 (21)
WT1		transcription regulator		-0.575	3.48e-06	ANXA11,CD2AP,CDKN1A,CSF1,CTSV,GSN,HSPG2,IGF1,ITM2B,JUNB,JUND,MYL6,NME1,PPIB,SPRY1,TGFB3,TIMP3,TM4SF1
curcumin		chemical drug	Activated	3.136	3.76e-06	APP,BIRC2,BIRC3,CD81,CDKN1A,CLDN4,CRY2,DAPK1,EDN1,EIF3H,F3,IGFBP5,JUN,JUNB,JUND,MARCKSL1,NFKBIA,SFTPD,TIMP3,TOB1,TP53,TPT1,TSC22D3	193 (16)
ULK4	0.422	kinase		-1.633	3.85e-06	DNAH9,FOXJ1,GSN,RSPH4A,RSPH9,TTLL6
GDF2		growth factor	Inhibited	-2.028	3.91e-06	ANXA3,ATP1A1,CRYAB,EDN1,ENPP2,IGF1,NFKBIA,NGF,SEMA3C,SPP1,YWHAH
E. coli B5 lipopolysaccharide		chemical - endogenous non-mammalian	Inhibited	-2.535	3.95e-06	BIRC2,BIRC3,CDKN1A,DBI,EEF1A1,ERRFI1,F3,GCLC,GPX1,HLA-A,JUNB,NFKBIA,PAH,PPIA,RHOB,SPP1,TGFB2,TGFB3,TTR	202 (16)
HMGA1		transcription regulator		-0.401	4.1e-06	CRYAB,CTSH,FSTL1,GSN,IER3,IGF1,IGFBP7,JUNB,Ly6a (includes others),LY6E,RHOB,SDC4,SOX4,SPARC	225 (20)
HGF		growth factor		-1.866	4.17e-06	AIMP2,ARPC5,BIRC2,BIRC3,CDC14A,CDKN1A,CRYAB,CSF1,DUSP6,DYNLL1,EDN1,EHF,EPCAM,ERRFI1,F3,FOXA2,IGF1,ISG15,KRT18,KRT19,LDHA,PHB,RHOB,SPP1,TGFB2,TIMP3,TP53,YWHAH	203 (17)
testosterone		chemical - endogenous mammalian		-0.188	4.52e-06	ALDOA,ANKRD1,ANXA3,CDKN1A,CLU,CTSV,CYB5A,IGF1,IGFBP5,JUN,JUND,LGALS1,MAK,Mt1,NFKB2,NFKBIA,NGF,PTP4A1,RALA,RPS11,TF,TGFB2,TUBB2A	277 (27)
diethylnitrosamine		chemical toxicant		-1.309	4.68e-06	BIRC2,CD63,CDKN1A,DCLK1,EPCAM,JUN,Mt1,Mt2,PAH,TIMP2,TM4SF4,TP53	196 (17)
decitabine		chemical drug	Inhibited	-4.354	5.16e-06	AGRN,ANKRD1,BIRC3,CD9,CDH4,CDKN1A,CLU,COMT,DAPK1,EEF1A1,EEF1B2,EHF,GPX1,GSN,HLA-E,IGFBP7,ISG15,ITGA3,JUNB,KLF6,KRT18,KRT7,LGALS1,NFKBIA,NME1,PAK3,PDLIM4,RASSF3,RPL4,RPS6,S100A10,SEMA3C,SPARC,SPP1,TGFB2,TIMP2,TIMP3,TP53	235 (18)
captopril		chemical drug		-1.129	5.6e-06	CLU,CP,CSRP2,F3,IER3,S100A10,SPP1,TGFB2,TGFB3,TNFRSF12A	161 (12)
PAX3		transcription regulator			5.74e-06	APP,CD151,CDKN1A,CLU,CTTN,F3,GSTM5,HSPG2,NFKB2,PPIB,PTP4A1,RHOB,SOX4,TGFB2,TIMP3,TP53	198 (10)
methotrexate		chemical drug		-0.262	5.88e-06	ACTB,ACTG1,ALDOA,CDKN1A,CLDN2,CSF1,CTSV,FKBP3,GSN,IGFBP5,Mt1,PPIA,SPP1,TIMP3,TOB1,TP53,TTR,ZFP36L1	228 (19)
SPHK1	-0.386	kinase		-1.969	6.29e-06	APP,BIRC2,BIRC3,CDKN1A,CTTN,JUN,SPHK1,TP53	182 (18)
C11orf95-RELA		fusion gene/product	Inhibited	-2.828	6.29e-06	BIRC3,CSF1,NFKB2,NFKBIA,RELB,SDC4,TAPBP,TNIP1
NRG1		growth factor		-0.885	6.79e-06	ANKRD1,CDC42EP1,CDH4,CDKN1A,DAD1,DUSP6,EDN1,EEF1A1,ERRFI1,FSTL1,IER3,JUN,JUNB,JUND,SH2D4A,SOX4,STMN1,TF,TGFB2	201 (18)
FAM3B		cytokine			6.91e-06	CDKN1A,IER3,KRT19,LDHA,LGALS1,SPARC	75 (7)
romidepsin		biologic drug		-0.224	7.08e-06	BIRC2,CDKN1A,CXADR,DUSP6,GSN,JUN,RHOB,RHOC,TIMP3,TP53	218 (20)
Tgf beta		group	Inhibited	-2.692	7.14e-06	BAMBI,CDKN1A,CLU,CSF1,EDN1,FSTL1,GCLC,HSPG2,IGF1,IGFBP5,JUN,JUNB,Ly6a (includes others),NFAT5,RHOB,SPARC,SPP1,TIMP2,TIMP3,TNFRSF12A	243 (20)
arsenite		chemical toxicant		-0.555	7.42e-06	ARL6IP5,CDKN1A,GCLC,GSTM5,HSPA4L,HSPB1,IER3,IGF1,JUN,Mt2,TGFB2,TP53	191 (19)
IL6		cytokine		-1.551	7.77e-06	AHNAK,APP,BAMBI,CD14,CDKN1A,CLDN2,CLU,CP,CRYAB,CSF1,DUSP6,ENPP2,ERRFI1,F3,HLA-A,IGF1,IGFBP5,JUN,JUNB,JUND,KRT18,LGALS1,Mt1,Mt2,NFKBIA,NGF,PHB,PSME2,PTGFR,Pvr,SNX10,SPP1,STAP2,TF,TNFRSF12A,TP53,TTR	212 (17)
HIF1A		transcription regulator		-1.508	7.79e-06	ALDOA,ANKRD37,BIRC2,CDKN1A,CSF1,CYB5A,CYP2S1,EDN1,HSPB1,IGF1,IGFBP5,JUN,KRT18,KRT19,LDHA,LGALS1,NPM1,PKM,PPIA,SDC4,SPHK1,TGFB2,TGFB3,TP53,TXN	212 (15)
methylnitrosourea		chemical toxicant			7.9e-06	ATP1A1,CLU,JUN,RPS11,RPS12,TIMP2,TIMP3	201 (11)
lysophosphatidic acid		chemical - other		-1.711	8.94e-06	ANKRD1,CD14,CSF1,EDN1,F3,JUN,JUNB,RALA,SPHK1,TF,TP53	186 (18)
IPMK		kinase	Inhibited	-2.414	9.05e-06	ACTB,CAPNS1,CSRP1,JUN,JUNB,MYL6	44 (5)
Pdgf (complex)		complex	Inhibited	-2.616	1.08e-05	CDKN1A,CYBA,EDN1,ERRFI1,F3,JUN,JUNB,SPARC,TGFB3,TIMP3,TP53	210 (23)
Ige		complex	Inhibited	-3.196	1.11e-05	CDC42EP5,CDKN1A,Crip2,CXADR,CXCL16,DUSP6,EDN1,ERRFI1,GSN,Gstt1,IER3,JUNB,MARCKSL1,NFKB2,NFKBIA,RELB,Serpinb6b,SPHK1,SPP1,TNFRSF12A,TPPP3	204 (16)
APOE	0.317	transporter		0.551	1.11e-05	ACTB,ANXA11,APP,BCAM,CAPNS1,CLU,CSF1,CSRP1,CTSV,EDN1,F3,HPCAL1,HSPG2,IGF1,ITGA3,JUN,RPL10A,SDC4,SPP1,TNIP1,TPT1	219 (19)
N-ethyl-N-nitrosourea		chemical toxicant			1.11e-05	CDKN1A,GSTM1,Mt1,Mt2,SPP1
mycophenolic acid		chemical drug		-1.997	1.37e-05	BIRC3,CD63,CDKN1A,CLU,EDN1,KRT19,MYL12A,NFKB2,SAMD4A,TUFT1	171 (10)
diethylstilbestrol		chemical drug		0.515	1.4e-05	AMBP,CD14,CDKN1A,CLU,CTTN,DCLK1,DUSP6,F3,HLA-A,IGF1,LGALS1,MFGE8,MNS1,Muc1,PAMR1,SHISA4,SPARC,TF,TGFB3,WFDC2	204 (22)
IL10RA		transmembrane receptor		0	1.47e-05	AADAC,CLIC6,CSRP2,CYP2S1,EDN1,EFEMP1,EHF,FSTL1,GSTM1,GSTM5,HLA-A,Ly6a (includes others),Serpinb6b,SERPINB9,SORBS2,SPARC,ST3GAL6,TTLL6,TTR,WFDC2
PDX1		transcription regulator		-1.796	1.48e-05	ACTB,ACTG1,DUSP6,F3,IER3,JUN,JUNB,KLF6,KRT18,MAN1A1,Mt1,PDZK1IP1,PTP4A1,RABGAP1L,SPP1	172 (13)
ACOX1		enzyme		0.898	1.5e-05	CD63,CDKN1A,CTSV,IGF1,KLF6,KRT23,MFGE8,PAH,RPL12,RPS24,TM4SF4,TP53,Uox
PRKCD		kinase		-1.828	1.57e-05	BIRC2,BIRC3,CDKN1A,CXCL16,DUSP6,JUN,JUNB,KLF6,NFKB2,NFKBIA,RELB,SPHK1,SPRY1,TP53,TUBB2A	186 (18)
fluvastatin		chemical drug		0.972	1.68e-05	APP,CD81,CD9,CDKN1A,CYBA,DCLK1,EDN1	152 (7)
ethionine		chemical toxicant	Inhibited	-2.63	1.68e-05	CD14,CLU,CP,IER3,S100A10,SPP1,TNFRSF12A
caffeic acid phenethyl ester		chemical drug	Activated	2.105	1.72e-05	BIRC3,CDKN1A,F3,HSPB1,KLF6,NFKB2,NFKBIA,PTGFR,RELB,RHOB,TP53	177 (17)
AHR		ligand-dependent nuclear receptor		1.582	1.73e-05	APP,CD14,CDKN1A,COL27A1,CYP2S1,DUSP6,EDN1,EFEMP1,FMO2,GSTM5,JUN,JUNB,LDHA,Mt1,Mt2,SPP1,TGFB2,TGFB3,TIMP2,TIMP3,TP53,TXN	206 (20)
MRTFB		transcription regulator	Inhibited	-2.375	1.75e-05	ACTB,ACTG1,ANKRD1,CD151,CYBA,DNAJB4,EDN1,GSTM5,HLA-A,IGFBP5,MYH10,OSCP1,RAB27B,TGFB2
N-acetyl-L-cysteine		chemical drug	Activated	2.258	1.8e-05	ATP1A1,BIRC2,BIRC3,BSG,CDKN1A,CLDN7,CYBA,DUSP6,EDN1,GCLC,JUN,NFKBIA,PRDX2,RHOB,SPP1,TP53,TXN	208 (17)
LATS2		kinase		1.937	2e-05	CD14,CDKN1A,CLDN4,EPCAM,KRT18,KRT19,TP53	31 (3)
ABL1		kinase		-1.136	2e-05	CDKN1A,CSF1,IER3,NME1,TGFB2,TGFB3,TP53	223 (17)
CD24		other			2.06e-05	APOBEC3B,CDKN1A,CTTN,JUN,PRDX2,PTP4A1,RELB,SPHK1,TIMP4,TP53,TUFT1	189 (15)
FSH		complex		0.424	2.32e-05	ACTB,ARL6IP5,CHUK,CTSV,DAPK1,GCLC,ITGA3,JUN,JUNB,KRT18,LGALS1,PDXK,PKM,PTP4A1,RAP1GAP,RHOB,RPL39,TF,TGFB2,TIMP2,TOB1,TP53,TUBA1A	180 (20)
RCE1		peptidase			2.36e-05	AEBP1,CRIP1,CRYAB,FSTL1,RCN1,S100A13,TGFB2
HSPA9		other		1.633	2.36e-05	CDKN1A,CLMN,KRT18,RPL7,TIMP2,TIMP4,TP53
PSMB9		peptidase			2.4e-05	HLA-A,NFKB2,NFKBIA,RELB	180 (14)
AKT1		kinase		-1.277	2.58e-05	ANKRD1,BIRC3,CDKN1A,CLU,CTSV,FSTL1,GCLC,GSTM5,Gstt1,IGFBP5,JUND,ME1,MYH10,NFKB2,PKM,RHOB,SPP1,TGFB2,TP53	246 (17)
ciprofloxacin		chemical drug		-1.571	2.67e-05	ALDH3B1,APP,B4GALNT1,CD47,CTSV,HLA-A,MFGE8,MYOF,RPL10A,RPL12,SPP1	72 (7)
thapsigargin		chemical toxicant		-1.346	2.71e-05	BIRC2,BIRC3,Casp12,CDKN1A,CLDN4,CLU,CP,EDN1,ERRFI1,IGF1,JUN,MLF1,NFKBIA,NGF,TP53	186 (15)
hexachlorobenzene		chemical toxicant	Inhibited	-2.828	2.74e-05	CD14,CLU,CP,IER3,RCN1,S100A10,SPP1,TNFRSF12A
TSC2		other		0.45	2.77e-05	CDKN1A,CP,CRIP1,CRYAB,ENPP2,GSN,HSPB1,IGFBP5,Mt1,PRELP,TMEM176A,TMEM176B	97 (7)
S-nitrosoglutathione		chemical toxicant		-1.387	2.78e-05	BIRC2,BIRC3,CDKN1A,IGF1,NFKBIA,S100A10,TP53	182 (18)
SP600125		chemical - kinase inhibitor		1.939	2.83e-05	APOBEC3B,CD2AP,CDKN1A,CLDN4,CPM,CXCL16,DDIT4L,F3,IGF1,ISG15,ITGA3,JUN,JUNB,Serpinb6b,SPARC,SPHK1,SPP1,TP53,TTC30B	222 (22)
GPER1		G-protein coupled receptor	Inhibited	-2.135	3.12e-05	CDKN1A,EDN1,ERRFI1,IGF1,JUN,MYH10,NFKBIA,TUFT1	204 (22)
HOXA9		transcription regulator		-1	3.13e-05	ALDH1A1,ARPC5,IGF1,JUN,JUNB,KRT18,RPL27A,SDC4,SERPINB9,SOX4,SPP1,Tmsb4x (includes others),TSC22D3,WSB1
ATN1		transcription regulator			3.21e-05	ATP1A1,CHUK,GSN,HPCAL1,IGFBP5,MARCKSL1,SOX4,SPP1,STMN1,TM4SF1,Tmsb4x (includes others),TUBB
metribolone		chemical reagent		-1.651	3.44e-05	ACSL3,ALDOA,APP,CDKN1A,CLU,COX7A2L,CRYAB,ERRFI1,IGF1,IGFBP5,KRT18,LDHA,MCEE,ME1,MYL12B,PFKP,PKM,PPIA,PPIB,TIMP2,TM4SF1,TP53,UQCR10,YWHAH	279 (23)
butyric acid		chemical - endogenous mammalian		-0.002	3.7e-05	ALDH1A1,ANXA5,CD81,CDKN1A,CLU,CSF1,DAPK1,FRMD6,FSTL1,GCLC,GSN,HSPG2,LY6E,MYH14,NFKB2,NFKBIA,NME1,NPM1,PHB,PKHD1,SPP1,TIMP3,TP53,ZFP36L1	233 (22)
ERBB3		kinase		0.714	3.71e-05	ACTB,CD47,CDKN1A,CLU,F3,FSTL1,IGFBP5,RRAS,SPARC,STMN1,TIMP3	232 (18)
melatonin		chemical - endogenous mammalian		-0.792	3.71e-05	CDKN1A,CRY2,DDAH2,EDN1,IGF1,JUNB,KRT19,Mt1,SPARC,SPP1,TP53	196 (19)
trans-hydroxytamoxifen		chemical drug		1.976	3.76e-05	ANXA3,CLU,CTSH,CYBA,GCLC,IER3,KLF6,KRT7,LDHA,RAP1GAP,SERPINB9,TGFB2,TGFB3,TM4SF1	165 (7)
tirapazamine		chemical drug			3.84e-05	CDKN1A,SPP1,TP53
paclitaxel		chemical drug		-0.4	3.88e-05	ANXA5,BIRC3,CD47,CDKN1A,CHUK,CLU,CRY2,DUSP6,ENPP2,HLA-A,IER3,ITGA3,JUN,JUND,NFKBIA,PRELP,SPRY1,STMN1,TP53	210 (19)
LINC01139		other		0	3.93e-05	ALDOA,ANKRD37,LDHA,PKM	134 (7)
Igkv1-117		other			3.93e-05	CDKN1A,JUN,JUNB,RELB	157 (19)
NUMB		other		1.987	4e-05	APP,BIRC3,CDKN1A,Mt2,TP53	210 (15)
NR3C2		ligand-dependent nuclear receptor		0	4e-05	CNN3,ECHDC2,EDN1,GPX1,IGF1,JUNB,MLF1,PPIB,SEMA3C,SPHK1,TP53,TSC22D3	196 (15)
SOX2		transcription regulator		-0.103	4.09e-05	ALDH1A1,ARPC1B,CD9,CDKN1A,CLDN7,CSPP1,EFEMP1,EPCAM,FAM107B,FOXA2,GSN,IGF1,JUN,KLF6,KRT18,KRT19,KRT7,NFKB2,Oasl2,S100A13,TF,TGFB2,TGFB3,TIMP3,TNS3	219 (13)
CSF1	-0.476	cytokine		-1.765	4.1e-05	APP,CD9,CDKN1A,CPM,CSF1,CTSH,HLA-A,IGF1,JUN,JUNB,LDHA,NFKB2,PKM,SPARC,SPP1,TP53,TPT1	208 (17)
HOXA10		transcription regulator		0.832	4.25e-05	ACTB,AIMP2,ALDH1A1,CDKN1A,CTSV,ENPP2,FKBP3,GSTA3,Gstt1,IGFBP5,KRT18,ME1,PDPN,TP53
acetaminophen		chemical drug		-0.577	4.25e-05	ACTB,ACTG1,CDKN1A,CTSV,GPX1,IGF1,JUN,ME1,Mt1,TF,TTR,TUBA1A,TUBB,TXN	156 (11)
OGA		enzyme		-0.666	4.4e-05	ACTG1,CD14,CD151,CD47,CDKN1A,CLDN7,CMTM8,CREB5,CXCL16,DCLK1,GSN,IGF1,IGFBP5,IGFBP7,JUN,RHOB,SERPINB9,TIMP2,TIMP3,TNFRSF12A,TP53,TUBA1A,ZMYND10	198 (7)
tetradecanoylphorbol acetate		chemical drug	Inhibited	-3.17	4.73e-05	ACTB,APOBEC3B,APP,BIRC3,CA8,CAPG,CD14,CDKN1A,CSF1,CTSH,CTSV,CTTN,CYBA,DUSP6,ERRFI1,F3,GCLC,GSTM1,HSPA2,IER3,IGF1,IGFBP5,ISG15,JUN,JUNB,JUND,KLF6,NFAT5,NFKB2,NFKBIA,NPM1,PDPN,PKM,PTGFR,RAB36,RELB,S100A10,SDC4,SERPINB9,SPARC,SPHK1,SPP1,SPRY1,TEKT1,TNFRSF12A,TP53,TSC22D3	206 (14)
DYSF		other			4.78e-05	ACTG1,ANKRD1,CTSH,CTSV,CYBA,ERRFI1,HLA-A,HSPB1,S100A13
TERT		enzyme			4.95e-05	CDKN1A,DUSP6,EFEMP1,FRMD6,GSN,IQGAP2,ISG15,KRT19,MFGE8,NFKBIA,SPP1,TP53	173 (11)
PTP4A1	-0.868	phosphatase	Activated	2.035	5.1e-05	AARS1,ALDOA,ANXA5,EEF1A1,IGFBP7,NME1,PKM,PRDX2,SPARC,STMN1,TP53
ETV5		transcription regulator		1.342	5.23e-05	AGRN,AHNAK,CLDN4,CLDN7,KRT19,KRT23,KRT7,SPP1,TIMP3,TINAGL1
BIRC3	-0.436	enzyme		1	5.24e-05	BIRC3,CSF1,NFKB2,NFKBIA,TP53	184 (12)
ammonium chloride		chemical drug		-1.342	5.24e-05	APP,ATP1A1,CD151,CD9,EDN1
ALDH1A2		enzyme		0.816	5.27e-05	ALDH1A1,CSF1,Ly6a (includes others),SPARC,SPP1,TIMP3
Z-LLL-CHO		chemical - protease inhibitor		-1.054	5.41e-05	ACTB,APP,ATP1A1,BIRC3,CDKN1A,CHUK,CLDN4,CLU,CRYAB,HSPB1,IER3,JUN,NFKB2,NFKBIA,PPIA,PTGFR,RPLP0,STMN1,TP53,TXN	192 (12)
Mek		group		0.312	5.64e-05	BCAM,CD63,CDKN1A,CLDN2,CLU,CPM,CRYAB,DUSP6,EPCAM,F3,GPM6B,HSPB1,IER3,JUN,JUNB,NGF,Pvr,SEMA3C,SPRY1,TP53	233 (21)
HOXD10		transcription regulator		0.707	5.74e-05	Gm12854/S100a11,ITGA3,NME1,PDZK1IP1,RHOB,RHOC,RPSA,TIMP2
REL		transcription regulator		-1.987	5.93e-05	ACAD9,APP,CDKN1A,CLDN10,CTSV,ENDOG,F3,HLA-A,IER3,IFT74,JUN,NFKB2,NFKBIA,PPP1R14B,RELB,TTC30B	187 (17)
VDR		transcription regulator		-1.772	5.93e-05	CD14,CDKN1A,CSF1,EDN1,F3,IER3,IGFBP5,ISG15,JUN,LGALS1,NGF,RELB,SPP1,TGFB2,TXN,WSB1	186 (21)
HNF1B		transcription regulator		-0.394	5.94e-05	AMBP,CLDN7,FOXA2,ITGA3,PDZK1IP1,PKHD1,SEMA3C,SLC5A1,SPARC,TM4SF4,TTR	29 (2)
clioquinol		chemical drug		-1	6.08e-05	APP,CDKN1A,JUN,TP53	234 (19)
canrenoate potassium		chemical drug		1.067	6.08e-05	CDKN1A,EDN1,SPP1,TP53
prostaglandin E2		chemical - endogenous mammalian		-1.082	6.22e-05	APP,BIRC3,Casp12,CD14,CDKN1A,CSF1,DYNLL1,IER3,IGF1,IGFBP5,IGFBP7,JUN,NFKBIA,SLC5A1,SPHK1,SPP1,ST3GAL4,TP53,TSC22D3	210 (18)
simvastatin		chemical drug		0.502	6.26e-05	ANXA3,APP,CD14,CD81,CD9,CDKN1A,EDN1,F3,Ly6a (includes others),MYH10,NFKBIA,RHOB,RHOU,SDC4,SPP1	195 (15)
SRF		transcription regulator	Inhibited	-3.408	6.88e-05	ACTB,ACTG1,ANKRD1,BICC1,CDKN1A,CPM,CSRP1,CSRP2,GSN,GSTM5,HIPK1,HSPG2,IGF1,JUN,JUNB,NPM1,OSCP1,PPIA,RAB27B,TUBB4B	99 (9)
PSMB11		peptidase	Activated	2.145	6.9e-05	CDH4,CLDN2,CLDN4,CLDN7,COL27A1,CREB5,CTSV,Pvr,RHOB,TGFB2,TNFRSF12A
RAF1		kinase	Inhibited	-2.049	7.33e-05	ANKRD1,CDC42EP1,CDKN1A,CRYAB,CTSH,DUSP6,HPCAL1,HSPB1,IER3,JUN,LDHA,NGF,RPS2,ST3GAL4,TUBB2A	237 (19)
TFAP2A		transcription regulator	Activated	2.157	7.35e-05	BIRC3,CDKN1A,DCLK1,EFEMP1,Ly6a (includes others),RAB27B,RPL6,RPL7,RPLP0,RPS5
TAZ		enzyme		-0.816	7.35e-05	ANKRD1,EDN1,ENPP2,KLF6,LDHA,MYOF,PKM,SAMD4A,SEMA3C,SORBS2
LTBR		transmembrane receptor		-0.816	7.79e-05	CLU,ENPP2,GPM6B,MFGE8,NFKB2,NFKBIA,PDPN	149 (9)
MAP2K1		kinase		-0.975	8e-05	ANKRD1,BIRC2,BIRC3,CDKN1A,CLDN2,CRYAB,DUSP6,F3,JUN,JUND,NFKBIA,NUDT19,RAP1GAP,SIRPA	212 (20)
TP73		transcription regulator		0.353	8.35e-05	BIRC2,CDKN1A,CLDN10,CLMN,CNN3,CRYAB,EDN1,FOXJ1,IER3,IGFBP5,LDHA,PDPN,RFX3,Serpinb6b,SPP1,STMN1,TGFB2,TIMP3,TIMP4,TNFRSF12A,TP53,TTR	244 (21)
Akt		group		-1.451	8.58e-05	AIMP2,ANKRD1,APP,BCAM,BIRC2,CD63,CDKN1A,CP,CPM,F3,GPM6B,HSPG2,IER3,IGF1,JUN,NFKBIA,RHOB,SOX4,SPP1,ST3GAL6,TP53	172 (15)
CSF2		cytokine	Inhibited	-2.029	8.59e-05	BIRC3,BSG,CD14,CD63,CDKN1A,CSF1,DUSP6,EDN1,EPCAM,F3,IER3,IGF1,JUN,JUNB,LDHA,MNS1,NFKB2,NFKBIA,RELB,SERPINB9,SPHK1,SPP1,STMN1,TF,TP53,TPT1	198 (12)
glutamine		chemical - endogenous mammalian		1.89	8.65e-05	AARS1,ACTB,BSG,CDKN1A,JUN,JUNB,NFKB2,NFKBIA,PHB,TP53	159 (20)
SU6656		chemical toxicant		0.816	8.94e-05	CSF1,IER3,JUNB,Mt1,Mt2,ZFP36L1	164 (7)
CCN2		growth factor	Inhibited	-2.021	9.37e-05	BIRC2,DAD1,IGF1,JUN,PTGFR,SDC4,SOX4,SPARC,TIMP3,TP53	243 (20)
bucladesine		chemical toxicant		0.912	9.39e-05	BAMBI,CD14,CDKN1A,CLU,CRYAB,DUSP6,ERRFI1,F3,IGF1,IGFBP5,JUN,JUNB,Mt1,NGF,Pvr,TF,TGFB2,TGFB3,TIMP2,TINAGL1	165 (19)
FT671		chemical - protease inhibitor			9.45e-05	CDKN1A,RPS27L,TP53
SMAD3		transcription regulator		-1.415	9.5e-05	ANKRD1,CDKN1A,DAPK1,EDN1,JUN,JUNB,JUND,Ly6a (includes others),RHOB,RPS6,SPARC,SPHK1,SPP1,TF,TGFB2,TGFB3,TIMP3	220 (19)
PRKAA1		kinase		0.918	9.67e-05	BIRC3,CDKN1A,CLU,GPX1,IGF1,LDHA,Ly6a (includes others),NFKBIA,RHOU,TNS3,TP53,ZFP36L1	216 (19)
8-bromoguanosine 3',5'-cyclic monophosphate		chemical - kinase inhibitor		0.747	0.000105	CDKN1A,EDN1,JUNB,S100A10,TGFB3,TP53	195 (23)
tacrolimus		chemical drug		0.47	0.000106	APP,CAPG,CXADR,DAPK1,EDN1,JUN,JUNB,MARCKSL1,MYH10,NFAT5,NFKBIA,NME1,PDLIM4,RCN1,SPP1,TNFRSF12A	206 (19)
HNF4A	0.345	transcription regulator		1.534	0.000108	AHNAK,ALDH1A1,AMBP,ANXA5,APP,ARPC5,BPHL,C22orf23,CALML4,CDC14A,CDKN1A,CEP83,CLDN2,CLDND1,COX7A2L,CP,CRIP1,CXADR,DAD1,DNAJB4,DUSP6,EPCAM,FAM107B,FKBP3,FMO2,FOXA2,GPX1,GSN,GSTO1,HLA-A,HSPA4L,IFT122,IGF1,JUN,JUNB,KIF9,KRT7,LDHA,MCEE,MRPL33,Mt1,Mt2,MYL6,NFE2L3,NME1,NPM1,PHB,PKM,PRDX5,PTGES3,PTGFR,RAP1GAP,RPL10,RPL12,RPLP0,RPS20,RPS6,RSPH4A,SEMA3C,SPP1,TAPBPL,TF,TIMP3,TM4SF4,TMEM176A,TMEM176B,TTC25,TT…	130 (7)
PAX3-FOXO1		fusion gene/product		1.664	0.00011	ANXA5,CD63,CDKN1A,CSF1,DAPK1,DBI,IER3,IGFBP5,MYH10,RPL6,RPS6,SPP1,SPRY1,TIMP2,TUBB4B
TGFBR2		kinase		0.084	0.000111	ACSL3,CD14,CDKN1A,CLU,CRYAB,JUN,KRT18,MYOF,PDPN,SPARC,SPP1,TGFB2,TGFB3,TNFRSF12A	230 (21)
Raf		group		-0.528	0.000111	CDKN1A,DUSP6,EDN1,IER3,JUN,KRT18,SEMA3C,SPRY1	203 (22)
trichostatin A		chemical drug	Inhibited	-3.369	0.000112	ACTB,AGRN,ANKRD1,APP,CD14,CD9,CDKN1A,CLDN10,CLU,CXADR,ENPP2,F3,GCLC,GSN,GSTA3,JUND,LGALS1,MYH14,MYOF,NFKB2,NFKBIA,NME5,PAH,PAK3,PHB,RASSF3,RELB,RHOB,S100A10,SEMA3C,SPHK1,SPP1,STMN1,TIMP2,TIMP3,TP53,YWHAH	244 (18)
inosine		chemical - endogenous mammalian		-1.054	0.000115	ANXA5,ARPC1B,CD63,Mt1,PPP1R14B,RHOC,TUBA1A
carrageenan		chemical drug	Inhibited	-2.63	0.000115	BCL10,JUN,JUNB,JUND,NFKBIA,NGF,RPS6	157 (15)
ERK1/2		group	Inhibited	-2.037	0.000122	BIRC2,BIRC3,CDC42EP5,CDKN1A,CTSV,DAPK1,EDN1,F3,HLA-A,ITGA3,JUN,JUNB,JUND,PKM,RHOC,SPP1,TAPBP,TIMP2	172 (15)
CAMK4		kinase	Inhibited	-2.213	0.000124	CDKN1A,CSRP1,F3,JUN,JUNB,TP53	172 (17)
RRP1B		transcription regulator			0.000128	CDKN1A,EIF3H,RPL14,RPL22,RPL39,RPL6,RPS26,RPS5,RPS9,SPP1
RASSF1		other		0.333	0.000133	ALDH1A1,CDKN1A,CLU,EFEMP1,GSN,SPP1,TUBB,TUBB2A,TUBB2B	209 (11)
MYB		transcription regulator		-0.081	0.000134	BIRC3,CD14,CNN3,CXCL16,FOXJ1,GSTM1,IGF1,IGFBP5,JUN,NFKB2,SDC4,SPHK1,SPP1	113 (12)
sulindac sulfide		chemical drug		0.629	0.000136	APP,ARPC1B,BCAM,CDKN1A,DYNLL1,KRT19,LDHA,RAP1GAP
2-deoxyglucose		chemical drug		-1.664	0.000136	APP,BIRC2,CDKN1A,GPX1,JUN,SLC5A1,SPP1,TP53	185 (18)
CP-55940		chemical reagent			0.000144	ACTB,CSF1,JUN,JUNB,NFKBIA,RPS9	134 (11)
LMNB1		other			0.000146	AEBP1,CRIP1,CRYAB,FSTL1,RCN1,S100A13,TGFB2
POR		enzyme		-0.762	0.00015	ACTG1,ALDH1A1,ANXA5,CHMP4C,GSTA3,GSTM1,GSTM5,HLA-A,LGALS1,Mt1,SDC4,TMEM176A,TUBB2B
EIF4E		translation regulator	Inhibited	-2.037	0.000159	BIRC2,CAPG,CDKN1A,CXCL16,CYBA,HLA-A,NFKBIA,PHB,PRDX5,PTGES3,RPL10A,SPHK1,TAPBP,TP53
FOSL2		transcription regulator			0.000165	F3,Gm12854/S100a11,RELB,SFTPD,SOX4,SPP1,TP53	209 (16)
3-methylcholanthrene		chemical toxicant		0.128	0.000165	GSTA3,GSTM1,GSTM5,ME1,Mt1,Mt2,TP53	146 (7)
INS		other		-0.553	0.000168	CDKN1A,EDN1,ERRFI1,F3,IER3,IGF1,IGFBP5,JUN,JUNB,JUND,Tmsb4x (includes others),TP53	202 (19)
HNF1A		transcription regulator		-0.614	0.000168	AADAC,AMBP,CLDN2,COL27A1,CYB5A,DUSP6,FAM107B,FOXA2,FXYD3,IGF1,ITM2B,KIF12,LY6E,MAPK15,PAH,PAMR1,PFKP,PKHD1,SFXN2,SLC5A1,SLCO3A1,TM4SF4,TTR,UGT2B7	29 (2)
AG490		chemical - kinase inhibitor		1.715	0.000172	BIRC3,CDKN1A,CTTN,EDN1,ENPP2,IGF1,MYH10,S100A10,SPP1	211 (19)
CCR2		G-protein coupled receptor		-1.129	0.000172	AEBP1,APP,CSF1,HSPG2,IGF1,PRELP,SPARC,TGFB2,TIMP2,TIMP4	219 (15)
VHL		transcription regulator		-0.671	0.000181	ALDH1A1,CDKN1A,CLDN4,F3,GPX1,IER3,MYL12B,RPS6,SPARC,TP53,ZFP36L1	205 (15)
HMG20A		transcription regulator			0.000186	CDH4,CXADR,KRT18
AATF		transcription regulator			0.000186	APP,CDKN1A,JUN	191 (7)
USP11		peptidase			0.000186	CDKN1A,CHUK,TP53	25 (3)
CEBPB		transcription regulator		-1.256	0.000188	ALDH1A1,APP,CD14,CDKN1A,CP,CYB5A,DAPK1,GLIPR2,HLA-A,IER3,IGF1,JUN,KRT18,PTGFR,SFTPD,SPP1,TF,TIMP4,TM4SF1,TMEM176A,TMEM176B,TP53	179 (18)
4-methylnitrosoamino-1-(3-pyridinyl)-1-butanone		chemical toxicant		-1.008	0.000193	CDKN1A,JUN,JUNB,SPP1,TF,TP53	211 (21)
GLI1		transcription regulator		-1.1	0.000194	ARPC5,CDKN1A,CLU,CSF1,FOXA2,IGF1,IGFBP7,KRT19,PLPP2,RHOB,SPP1,SYNE1,TIMP3,TP53	195 (7)
TAF4B		transcription regulator			0.0002	IER3,JUN,NFKBIA,SPP1,TGFB3
Hif1		complex		-0.555	0.0002	ALDOA,CDKN1A,CP,EDN1,LDHA,LGALS1,PKM,TF
cadmium		chemical toxicant		1.039	0.0002	ATP1A1,CDKN1A,CYB5A,JUN,Mt1,Mt2,SLC5A1,TP53	207 (20)
LEP		growth factor	Inhibited	-2.237	0.000212	ACSL3,APP,CD14,CD63,CDKN1A,CTSV,CYB5A,CYBA,DUSP6,EDN1,F3,GCLC,GPX1,GSTA3,IGF1,JUN,JUNB,JUND,SPARC,SPP1,TIMP3,TP53,TRAF3IP1	222 (19)
AGTR1		G-protein coupled receptor		-0.447	0.000222	CP,CYBA,EDN1,GSTM5,JUN,TGFB3	84 (10)
trichloroethylene		chemical toxicant		1.134	0.000231	CD47,CD63,GSTO1,MFGE8,RHOB,SPARC,YWHAQ
PTK2		kinase		-1	0.000231	BIRC2,BIRC3,CDKN1A,KRT18,SPP1,TIMP3,TP53	223 (20)
benzene		chemical toxicant		1.23	0.000231	CD47,CD63,CDKN1A,MFGE8,RHOB,SPARC,YWHAQ
ANGPT2		growth factor		-1.987	0.000236	CDKN1A,COMT,CRYAB,CYBA,DNAJB4,EDN1,EEF1B2,HSPA2,MFGE8,NME1,RHOB,RPS6,TNFRSF12A,TP53	200 (19)
CDK19		kinase		-0.816	0.000237	CD81,CDKN1A,CLU,HSPA4L,JUN,RPS12,RPS27L,SPHK1,ZFP36L1
ECSIT		transcription regulator	Inhibited	-2.183	0.000241	IER3,JUNB,NFKB2,NFKBIA,RELB	104 (10)
SYVN1		transporter		-1.36	0.000248	ACSL3,APP,ATP1A1,CD151,F3,HLA-A,HSPB1,ITGA3,MYOF,NFKB2,RPL10	192 (7)
Ap1		complex		-1.725	0.000251	CLU,DUSP6,EDN1,F3,IGF1,JUN,KRT18,NGF,Pvr,RELB,SFTPD,SPARC	182 (16)
LGALS3	0.275	other			0.000256	CDKN1A,CTSH,CTSV,DUSP6,ENPP2,IGF1,IGFBP5,KRT18,KRT19	223 (21)
isobutylmethylxanthine		chemical toxicant		-1.32	0.000259	ACSL3,AEBP1,ALDH3B1,CD14,CDKN1A,ITGA3,JUN,JUNB,LDHA,Mt1,Mt2,TIMP2,TIMP3,TUBB	205 (20)
IL2		cytokine		-1.551	0.000276	BIRC3,CAPG,CD47,CD9,CDKN1A,CSF1,DAPK1,DUSP6,EDN1,ENPP2,IER3,ITM2B,JUN,JUND,KLF6,Ly6a (includes others),LY6E,NME1,PDLIM4,PHB,RCN1,RHOB,RHOC,RPL10,SERPINB9,SPP1,TNFRSF12A,TP53	201 (18)
NFAT5	-0.3	transcription regulator	Inhibited	-2.33	0.000276	CXCL16,EDN1,F3,HSPA2,IGFBP7,NFKBIA,PFKP,RPS7,SPP1	86 (7)
prednisolone		chemical drug		-0.258	0.000279	APP,BIRC2,BIRC3,DAD1,DAPK1,EDN1,FMO2,IGF1,KIF9,NME5,PFKP,PRDX2,SPP1,TP53,TSC22D3	176 (12)
Alpha catenin		group	Activated	3.11	0.00028	ADAM33,BIRC3,CTSV,FSTL1,IGF1,IGFBP7,NFKBIA,RELB,RHOC,TNFRSF12A	102 (7)
CAV1		transmembrane receptor		-1.192	0.00028	CD14,CDKN1A,CLDN7,KRT18,KRT19,KRT7,NPM1,RALA,RPS9,TP53,WFDC2	214 (22)
HSF1		transcription regulator		0.158	0.000285	BCL10,CHD3,CLDN7,CLU,CRYAB,CSRP2,EFEMP1,HSPA4L,HSPB1,JUN,LDHA,RPL22,SEMA3C,TTR	15 (2)
SIRT1		transcription regulator		0.346	0.000286	ACTB,BIRC3,CD63,CD81,CD9,CDKN1A,DDAH2,GSTA3,GSTM1,HLA-A,IGF1,LY6E,MYL6,Oasl2,PHB,RELB,RPL10A,SCX,TIMP2,TIMP3,TP53	211 (19)
BDNF		growth factor		0.423	0.000287	AGRN,ANXA5,APP,CDKN1A,CP,DUSP6,FRMD6,HSPA2,HSPA4L,JUN,LGALS1,Rpl23a,S100A10,SPARC,SPP1,TGFB2,Tmsb4x (includes others),TUBA1A	219 (18)
(+)-MK-801		chemical drug		0.931	0.000287	ALDOA,APP,CDKN1A,JUN,JUNB,JUND,NFKBIA,TP53	208 (20)
NCF1		enzyme		-1.067	0.000288	CD14,CDKN1A,EDN1,F3,IGF1	210 (17)
LATS1		kinase	Activated	2.213	0.000288	CD14,CLDN4,EPCAM,KRT18,KRT19
H2AX		transcription regulator			0.000291	ACTB,CLU,MYL6,PKM,RPL10A,TIMP3	86 (7)
CYP1A1		enzyme			0.000298	ANXA3,CTTN,IGF1,KRT19,KRT7,Mt1,Mt2,PTP4A1,ST3GAL4
STK3		kinase		-0.152	0.000308	PDPN,SFTPD,SOX4,SPP1	14 (2)
RNA polymerase II		complex			0.000313	ACTB,CD14,CDKN1A,CSF1,IGF1,JUN,JUNB,NFKBIA,RPL10A,RPL12,RPS21,RPS6,SPP1,TAPBP,Tmsb4x (includes others),TXN	193 (7)
TNFRSF8		transmembrane receptor		-1.026	0.000317	AHNAK,CDKN1A,GCLC,JUNB,NFKB2,PDPN,RELB	125 (11)
CXCR4		G-protein coupled receptor		-1.406	0.000317	CD9,CDKN1A,F3,IGFBP7,JUNB,RRAS,TP53	214 (21)
miR-542-3p (miRNAs w/seed GUGACAG)		mature microRNA			0.00032	RPL22,RPS28,TP53
CEBPD		transcription regulator		-1.505	0.000321	CD14,CDKN1A,CLU,CTSV,IGF1,IGFBP5,NGF,SFTPD,TP53	219 (21)
TNFSF10		cytokine		-1.177	0.000321	BIRC2,BIRC3,CD14,HLA-A,ISG15,JUN,NFKBIA,PSME2,TP53	180 (12)
fulvestrant		chemical drug		0.633	0.000326	CCDC34,CDKN1A,COMT,CSF1,DYNLL1,IER3,Ifi27,IGF1,IGFBP5,JUN,NME1,SERPINB9,STMN1,TGFB2,TP53,TSC22D3	239 (19)
TXNRD1		enzyme		0.447	0.000331	GCLC,GSTA3,GSTM1,GSTM5,ME1,TP53
JUND	-0.387	transcription regulator			0.000341	CLU,CXCL16,F3,JUND,SERPINB9,SFTPD,SOX4,SPP1	168 (15)
AR		ligand-dependent nuclear receptor	Inhibited	-2.082	0.000359	ALDH1A1,ANKRD1,B4GALNT1,CDKN1A,CHRNB1,DBI,EDN1,FXYD3,GSN,GSTM1,IGF1,IGFBP5,Ly6a (includes others),RASSF3,RHOB,SLCO3A1,SPP1,TF,TGFB2,TIMP2,TIMP3,TMEM176A,TMEM176B,TNFRSF12A	246 (21)
ZMPSTE24		peptidase		0.505	0.000375	CDKN1A,CTSV,FMO2,IGF1,IGFBP5,SIRPA	143 (7)
doxifluridine		chemical drug		1.954	0.000396	CDKN1A,RPL10A,RPL3,RPS27L
DNAJB6		transcription regulator		0.655	0.000396	KRT18,NPM1,SPARC,SPP1	73 (7)
NEDD4		enzyme		0.218	0.000396	CDKN1A,DUSP6,ERRFI1,TP53	151 (7)
NRAS		enzyme		1.43	0.000397	AGRN,ANKRD1,CDKN1A,Crip2,DUSP6,HLA-A,Ifi27,ISG15,LGALS1,PRDX2,RHOB,SCX,TUBB2A	144 (7)
EDN1	-0.5	cytokine	Inhibited	-2.585	0.000397	ACTB,ANXA5,EDN1,ERRFI1,JUN,JUNB,MARCKSL1,MYL6,NPM1,RPSA,TIMP3,TP53,TPT1	219 (18)
LLGL2	0.311	other	Inhibited	-2.236	0.000403	ANKRD1,FSTL1,SH2D4A,STMN1,TGFB2
N-acetylsphingosine		chemical reagent		-1.787	0.000423	CDKN1A,CRYAB,GSTM5,JUN,SPHK1,TP53	168 (17)
POU5F1		transcription regulator	Inhibited	-3.667	0.000425	BCL10,BIRC2,BIRC3,CDKN1A,CLDN7,DAPK1,EFEMP1,EPCAM,FOXA2,KRT18,Oasl2,PHB,SIRPA,SPP1,TF,TGFB2,TGFB3,TP53	200 (16)
ATF3		transcription regulator		0.141	0.000428	BIRC3,CDKN1A,CXCL16,GSN,HSPB1,JUN,KRT19,NFKB2,TP53	187 (14)
CD40LG		cytokine	Inhibited	-3.243	0.000433	BIRC2,BIRC3,CD63,CDKN1A,CLU,CSF1,F3,ISG15,JUN,JUNB,JUND,MARCKSL1,NFKB2,NFKBIA,PSME2,RELB,TNIP1,TP53,TUBB,ZFP36L1	179 (14)
ESR2		ligand-dependent nuclear receptor		1.106	0.000447	BAMBI,CDKN1A,CHUK,CLDN4,CLU,CPM,CXCL16,DNAH11,EDN1,ENPP2,GCLC,HSPA2,IGF1,JUNB,KRT19,NFE2L3,NFKB2,NFKBIA,PTGFR,RALA,SOX4,SPP1,TIMP2,TNS3	250 (19)
Npm		group			0.000457	CDKN1A,RPL3
omethoate		chemical toxicant			0.000457	CDKN1A,TP53
Rps15a-ps4		other			0.000457	NFKB2,NFKBIA	100 (8)
NSA2		other			0.000457	CDKN1A,TP53
MDC1		other			0.000457	CLU,TP53	83 (7)
ZDHHC7		enzyme			0.000457	APP,TF
Importin alpha		group			0.000457	CDKN1A,TP53	73 (7)
ECE1		peptidase			0.000457	APP,EDN1	98 (7)
MAGEA4		other			0.000457	CDKN1A,TP53
POLDIP3		other			0.000457	CDKN1A,ISG15
TSPYL2		other			0.000457	CDKN1A,TP53
KRT18	-0.665	other			0.000457	KRT18,KRT7
PCBP4		other			0.000457	CDKN1A,TP53
MI-63		chemical reagent			0.000457	CDKN1A,TP53
DUOX2		enzyme			0.000457	CDKN1A,TP53	94 (7)
dicumarol		chemical drug			0.000457	Mt1,TP53
chalcone-24		chemical reagent			0.000457	BIRC2,BIRC3
vinflunine		chemical drug			0.000457	CDKN1A,TP53
epigallocatechin-gallate		chemical drug		1	0.000467	APP,BIRC2,CDKN1A,EDN1,F3,GCLC,ISG15,JUN,JUNB,JUND,NFKBIA,RELB,TIMP2,TP53	217 (16)
tributyrin		chemical drug		-1.89	0.000471	BIRC3,CDKN1A,EDN1,MYL12A,NFKB2,SAMD4A,TUFT1	60 (5)
H2AZ1		other			0.000473	CDKN1A,FOXA2,IGFBP5,RPS6,TTR
CLU	-0.67	other	Inhibited	-2.213	0.000473	APP,CDKN1A,CLU,NFKBIA,TP53	221 (19)
IFRD1	-0.257	other	Activated	2.213	0.000473	IGF1,PPIA,RPL22,RPL39,SPP1
crocidolite asbestos		chemical toxicant		-1.392	0.000473	GCLC,JUN,JUNB,JUND,SPP1	168 (19)
butylated hydroxyanisol		chemical toxicant		0.021	0.000473	GCLC,GSTA3,GSTM1,GSTM5,JUN	154 (8)
gefitinib		chemical drug		-0.378	0.000474	ALDH1A1,FMO2,HSPB1,IGF1,IGFBP5,KRT19,Muc1,NFKB2,RELB,RHOB,TIMP2,TIMP3	202 (18)
vincristine		chemical drug		-1	0.000476	CDKN1A,IGF1,JUN,TP53,TUBB2A,YWHAQ	184 (20)
cytokine		group		-0.847	0.000498	APP,CLU,CSF1,EDN1,F3,JUN,Ly6a (includes others),NGF,RPSA,SPARC,TGFB2	173 (13)
S100B		other		-0.849	0.0005	APP,CDKN1A,JUN,TP53	174 (17)
DES		other			0.000504	ANKRD1,KRT18,SPP1	140 (7)
DIABLO		other			0.000504	BIRC2,BIRC3,CDKN1A	172 (10)
aplidine		biologic drug			0.000504	JUN,JUNB,JUND	197 (19)
homocysteine		chemical - endogenous mammalian		-0.035	0.000513	CDKN1A,CLU,DDAH2,EEF1A1,F3,PKM,PRDX2,TP53	181 (18)
methylmercury		chemical toxicant		1.134	0.000517	CD47,CD63,MFGE8,Mt1,RHOB,SPARC,YWHAQ
MET		kinase		-0.971	0.000528	CDKN1A,CTSV,EDN1,GCLC,HSPB1,IGF1,ITGA3,JUN,SLCO3A1,SPP1	160 (20)
HOXC8		transcription regulator	Activated	2.2	0.00055	ANKRD1,APP,KRT19,Ly6a (includes others),SPP1
ICMT		enzyme			0.00055	AEBP1,CDKN1A,CRYAB,FSTL1,S100A13
TFRC		transporter	Activated	2.588	0.000554	CDKN1A,JUN,LDHA,ME1,TGFB2,TGFB3,TNFRSF12A,TP53	85 (7)
KLF2		transcription regulator		1.378	0.000579	CDKN1A,EDN1,F3,JUNB,MYH10,NFKBIA,PDPN,RALA,Serpinb6b,SERPINB9,SFTPD,TGFB2	170 (11)
NFKB1		transcription regulator	Inhibited	-2.494	0.000603	ANKRD1,APP,BAMBI,BIRC3,CDKN1A,CSF1,EHF,ENPP2,IER3,ISG15,LGALS1,NFKB2,NFKBIA,RELB,SDC4,TP53	190 (14)
trovafloxacin		chemical drug		-1.89	0.00062	BIRC3,CDKN1A,ERRFI1,GCLC,HLA-A,JUNB,NFKBIA	194 (10)
SLC29A1		transporter	Activated	2	0.000623	CDKN1A,RPL10A,RPL3,RPS27L
ITGA6		transmembrane receptor		0.313	0.000623	ENPP2,ITGA3,RPSA,TP53	191 (7)
tetrachlorodibenzodioxin		chemical toxicant		1.92	0.000637	AARS1,CDKN1A,COMT,CTSV,CYP2S1,EDN1,FMO2,HSPA2,JUN,JUND,KRT19,KRT7,NME1,PTGFR,SLCO3A1,TGFB2,TGFB3,TP53,TXN	190 (16)
CDK5		kinase	Inhibited	-2.163	0.000637	CD14,CDKN1A,JUN,NFAT5,RALA	155 (7)
NKX2-1		transcription regulator			0.000637	CA8,CD14,CLU,ENPP2,FXYD3,HLA-A,IER3,PDPN,Serpinb6b,SERPINB9,SFTPD,TGFB2
NLRX1		other		1.633	0.000668	BCL10,BIRC3,CHUK,NFKB2,NFKBIA,RELB	165 (13)
SPDEF		transcription regulator		1.951	0.000678	BIRC3,CDKN1A,CLDN7,FOXJ1,ITGA3,LASP1,STMN1
FN1		enzyme		-0.426	0.000719	APP,BIRC3,CDKN1A,F3,GPX1,JUND,KRT7,NFKBIA,SDC4,SPARC,SPP1,TIMP2,TNIP1	141 (11)
TRIM24		transcription regulator	Activated	2.121	0.000732	AGRN,CSRP1,Gm12854/S100a11,ISG15,Ly6a (includes others),MYH10,SAMD9L,SPP1,TP53	75 (7)
GNA15		enzyme			0.000732	CP,CRYAB,HLA-E,Mt1,Pvr,SORBS2,SYNE1,TGFB3,ZFP36L1
green tea polyphenol		chemical drug		-1	0.000734	CDKN1A,CHUK,IGF1,JUN,TP53	200 (18)
bafilomycin A1		chemical drug		-1.342	0.000734	CD151,CD9,NFKBIA,RHOB,TIMP2
SOX4	-0.398	transcription regulator		-1.849	0.000735	CLIC6,DDAH2,Gm12854/S100a11,IGF1,Ly6a (includes others),MARCKSL1,Mt1,SNX10,TMEM176B,Tmsb4x (includes others),TUBA1A,TUBB2B
JAK1		kinase		-0.64	0.000739	CD14,CDKN1A,ENPP2,HLA-A,JUNB,Oasl2,TF	149 (21)
RPS15		other			0.000743	RPS11,RPS24,RPS29,RPS5,RPS6,RPS9
beta-naphthoflavone		chemical toxicant		1.103	0.000743	CYP2S1,GCLC,GSTM1,GSTM5,ME1,SLCO3A1	153 (7)
NELFA		other			0.000744	BSG,CDKN1A,JUNB
TSG101		transcription regulator			0.000744	CDKN1A,STMN1,TP53	172 (12)
raltitrexed		chemical drug			0.000744	CDKN1A,FXYD3,TP53	73 (7)
CYB5R4		enzyme		-1.977	0.000766	ACSL3,GCLC,Mt1,Mt2
WWOX		enzyme		1.369	0.000766	ITGA3,TIMP2,TIMP4,TP53	146 (7)
RFX3	0.651	transcription regulator			0.000766	DNAH11,DNAH9,DNALI1,FOXJ1
finasteride		chemical drug		-1.964	0.000766	CLU,EDN1,TGFB2,TGFB3
PI3K (complex)		complex		-0.298	0.000777	BIRC3,CDKN1A,GCLC,GSTM5,IGF1,JUN,LASP1,NFKB2,NFKBIA,NME1,PRDX2,RHOB,RPS6,SPP1,STMN1,TP53	211 (20)
SLC13A1		transporter		0	0.000805	ACTG1,ALDH1A1,CHD3,HSPB1,IGF1,Mt1,RPL8,SPP1
RXRA		ligand-dependent nuclear receptor		1.265	0.000834	ACSL3,ALDH1A1,APP,CDKN1A,CLMN,CRYAB,CTSH,FSTL1,GCLC,GPX1,IER3,IGF1,NME1,SPP1,TGFB2,TXN	199 (22)
ING1		transcription regulator		0.359	0.000842	CDKN1A,CTTN,SPP1,TP53,TPT1
SN-38		chemical drug			0.000842	BIRC2,BIRC3,CDKN1A,CLU,TP53	177 (17)
MAPK9		kinase		-1.018	0.000842	BIRC3,CDKN1A,EDN1,GSTM1,JUN,JUNB,JUND,KLF6,MARCKSL1,RPSA,TP53	177 (19)
UCP1		transporter		-1.554	0.000842	AARS1,ANKRD1,CHCHD10,CTSV,EEF1A1,GSTM1,GSTO1,NUDT19,Snhg12,STAP2,STBD1
DMD		other			0.000854	ACTG1,ANKRD1,CDKN1A,DYNLRB2,EEF1A1,IGF1,KRT18,MLF1,PAMR1,PKM,S100A10,ST3GAL6,Tmsb4x (includes others)
MYD88		other	Inhibited	-2.365	0.00086	ALDH1A1,APOBEC3B,BAMBI,BCL10,CD14,HLA-A,IGF1,IGFBP5,ISG15,JUN,NFKB2,NFKBIA,RELB,SLCO3A1,SPP1	149 (13)
ATM		kinase		-0.075	0.000876	ACTB,BIRC2,CDKN1A,CLU,JUN,PSME2,TP53	160 (20)
LIF		cytokine		-1.137	0.000891	AHNAK,CD9,CDKN1A,ENPP2,FOXA2,IGF1,JUN,JUNB,RHOU,SPP1,TMEM176A,TMEM176B,TP53	160 (18)
mir-8		microRNA		1.808	0.000926	CD47,CDKN1A,CLDN7,DDIT4L,EPCAM,ERRFI1,KRT19,MYH10,MYOF,TGFB2,TIMP2,TOB1	196 (9)
Pkg		group		0.152	0.00093	EDN1,JUN,PRDX2,TXN	234 (18)
2-mercaptoacetate		chemical drug			0.00093	IGF1,MFGE8,S100A10,TPT1
pilocarpine		chemical drug			0.00093	APP,EDN1,JUNB,NGF	157 (14)
ERK		group		-1.625	0.00094	CDKN1A,CLDN4,CLU,CTTN,EDN1,GCLC,IER3,JUN,JUNB,KRT18,SOX4,TP53,TUBA1A,ZFP36L1	211 (15)
TGFB2	-0.877	growth factor		-1.154	0.00094	ALDH1A1,EDN1,HSPG2,KCNQ1OT1,NGF,SPHK1,SPP1,TGFB2,TIMP2	236 (20)
GSR	0.295	enzyme		0.447	0.00096	GCLC,GSTA3,GSTM1,GSTM5,ME1
KLF4		transcription regulator	Inhibited	-2.6	0.000992	ALDH1A1,CD14,CDKN1A,CLDN7,EFEMP1,EPCAM,HSPB1,KRT19,KRT7,Oasl2,PFKP,SPHK1,TF,TGFB2,TGFB3,TP53	164 (15)
CST5		other		-0.671	0.000996	AHNAK,ANXA3,ANXA5,CHD3,CLDN7,DNAJB4,EEF1B2,EPN3,IQGAP2,KRT23,PRDX2,SOX4,SYT7,TESC,TXN
L-methionine		chemical - endogenous mammalian		-1.067	0.00101	CLU,EEF1A1,F3,NFKBIA,RHOB,SPP1	212 (16)
JAG1		growth factor		-0.647	0.00101	CDKN1A,DUSP6,SPP1,TGFB3,TIMP3,TP53	174 (13)
3-nitropropionic acid		chemical toxicant		-1.342	0.00101	APP,GCLC,JUN,LDHA,NPM1,TP53	193 (18)
NAP1L1		other			0.00105	FOXA2,IGFBP5,TTR
S100P		other			0.00105	ACTB,KRT18,KRT19
levamisole		chemical drug			0.00105	CDKN1A,CLU,EDN1
CBR-470-1		chemical - kinase inhibitor			0.00105	GCLC,ME1,TXN	27 (2)
oleic acid		chemical - endogenous mammalian		-0.563	0.00106	APP,CLU,EDN1,GCLC,IGF1,Mt1,Mt2,NFKBIA,SPHK1	243 (22)
EZH2		transcription regulator		0.105	0.00107	ACTB,BIRC3,CD63,CDKN1A,CHRNB1,CLDN10,FOXJ1,IGF1,MAPK15,MYL6,NFKBIA,NME1,NME5,RAP1GAP,RPL10A,TGFB2,TIMP2,TIMP3,TP53	80 (7)
androgen		chemical drug		0.128	0.00108	CA8,CTSV,GSN,IGF1,IGFBP5,JUN,Mt1,NFKBIA,SDC4,SOX4,TPT1	162 (12)
Lh		complex		0.128	0.0011	ACTB,ARL6IP5,CHUK,DAPK1,ITGA3,KRT18,PDXK,PHB,PTP4A1,RHOB,TGFB2,TNFRSF12A,TP53,TUBA1A	114 (11)
sulforafan		chemical drug		-0.126	0.0011	ALDH1A1,CDKN1A,GCLC,GPX1,GSTA3,GSTM1,GSTM5,Mt1,NFKBIA,TP53	183 (16)
bleomycin		chemical drug		-1.854	0.00111	CDKN1A,FOXJ1,IGF1,SDC4,SPHK1,SPP1,TGFB2,TIMP2,TIMP3,TIMP4,TINAGL1,TP53	221 (17)
enalapril		biologic drug		-1.633	0.00111	CLDN4,CLU,CP,IER3,SPP1,TNFRSF12A	168 (7)
LY294002		chemical - kinase inhibitor		1.955	0.00111	BIRC3,BSG,CD14,CD2AP,CDKN1A,CLDN4,CP,CXCL16,DUSP6,F3,FLRT2,GCLC,IER3,IGF1,IGFBP5,JUN,JUNB,ME1,NFKBIA,SEMA3C,SPP1,SPRY1,TP53	197 (18)
RELB	-0.522	transcription regulator		-1.457	0.00112	ANXA5,BIRC3,CDKN1A,MARCKSL1,NFKB2,NFKBIA,RELB	131 (12)
prostaglandin A1		chemical - endogenous non-mammalian		-1.97	0.00112	CD14,CDKN1A,NFKBIA,TP53	165 (15)
DOT1L		phosphatase			0.00112	EDN1,PPIA,RPLP0,RPS2
EIF4G2		translation regulator		-1	0.00112	ACTB,CDKN1A,JUN,KRT19	79 (7)
EPCAM	-0.468	other			0.00112	CDKN1A,EPCAM,JUN,TP53
PPARG		ligand-dependent nuclear receptor		0.766	0.00113	APP,CDKN1A,CYBA,EDN1,FOXA2,Gm12854/S100a11,GSTA3,IGF1,IGFBP5,IGFBP7,JUN,KLF6,KRT18,KRT19,ME1,MYH14,RHOB,RPSA,SPP1,TP53,TSC22D3,TUBB	233 (19)
IGF2		growth factor		1.457	0.00113	CDKN1A,CTSV,IER3,IGF1,IGFBP5,JUNB,NFKBIA,NGF,RHOB,SPP1,TP53	214 (21)
FOXO3		transcription regulator		0.852	0.00118	ANXA3,BCL10,CDKN1A,CTSV,GCLC,GPX1,GSTM5,IER3,IGF1,IGFBP7,JUNB,Mt1,Mt2,NFKBIA,PRDX5,TGFB2,TP53	230 (17)
BRAF		kinase			0.00121	APP,BCAM,BIRC2,BIRC3,CD63,CDKN1A,CPM,CSF1,EPCAM,F3,GPM6B,HSPG2	196 (20)
Il3		cytokine		0.025	0.00121	CD14,CDKN1A,CSF1,IGF1,Ly6a (includes others),SPP1,TP53	195 (21)
hydrocortisone		chemical - endogenous mammalian		-0.817	0.00122	ANKRD1,APP,ERP29,IGF1,IGFBP5,IGFBP7,Mt1,NFKBIA,TP53,TUBB	172 (16)
staurosporine		chemical - kinase inhibitor		-0.15	0.00126	ANXA5,APP,CDKN1A,IGF1,IGFBP5,ISG15,PHB,RPS11,TP53	198 (18)
dinoprost		chemical - endogenous mammalian		-0.378	0.00131	ATP1A1,EDN1,GSTM1,JUN,PTGFR,SPP1,TIMP3	229 (21)
cyclophosphamide		chemical drug		-1.764	0.00131	CLU,CP,IER3,Ly6a (includes others),NGF,SPP1,TNFRSF12A	164 (11)
IL13		cytokine		-0.671	0.00132	BIRC2,CD14,CLDN2,CP,CTSH,CTSV,ENPP2,F3,FOXA2,FXYD3,GSN,IGF1,JUN,KLF6,PFKP,SPHK1,SPP1,ST3GAL6,TIMP2,TIMP4	231 (19)
cigarette smoke		chemical toxicant		-0.302	0.00132	CDKN1A,GCLC,GSTA3,GSTM5,Gstt1,IGF1,JUN,Muc1,NFKBIA,Oasl2,PTP4A1,RPS6,Tmsb4x (includes others),TP53	208 (19)
PDGF-DD		complex		0	0.00133	Casp12,CLU,TNFRSF12A,TP53
Pde4		group		1	0.00133	CD14,CDKN1A,KRT18,TP53	118 (14)
HTATIP2		transcription regulator			0.00133	PKM,SPARC,SPP1,TP53
tetrandrine		chemical drug			0.00133	CDKN1A,ENDOG,JUN,TP53	118 (14)
S-nitroso-N-acetyl-DL-penicillamine		chemical reagent		0.78	0.00135	CDKN1A,MARCKSL1,S100A10,SPP1,TGFB3,TP53	228 (20)
MAP2K7		kinase			0.00135	BIRC3,CDKN1A,ENPP2,JUNB,RHOB,RPS6	186 (16)
GNRH1		other		-1.323	0.00135	APP,IGF1,IGFBP5,JUN,JUNB,RPSA	231 (20)
Pln		other			0.00135	ACTB,ALDOA,ATP1A1,MYL6,RALA,RRAS
PTEN	0.296	phosphatase		0.96	0.00135	CA8,CDKN1A,CNN3,CSRP1,CTSV,EDN1,F3,FOXA2,GPM6B,IGF1,IGFBP5,ISG15,JUND,KLF6,KRT19,ME1,Muc1,NME1,RPS6,SDC4,SFTPD,SOX4,SPP1,SRSF10,Tmsb4x (includes others),TP53,TRAF3IP1,TSC22D3	217 (20)
(diaminocyclohexane)(diacetato)(dichloro)platinum		chemical reagent			0.00135	CDKN1A,TP53
RFFL		enzyme			0.00135	CDKN1A,TP53
TTC5		other			0.00135	CDKN1A,TP53	151 (7)
PYHIN1		other			0.00135	CDKN1A,TP53
CTBP1-DT		other			0.00135	CDKN1A,TP53
Trk Receptor		group			0.00135	DUSP6,EDN1
YEATS4	-0.271	transcription regulator			0.00135	CDKN1A,TP53	113 (4)
TERF1		transcription regulator			0.00135	CDKN1A,TP53	50 (5)
YARS1		enzyme			0.00135	F3,NFKBIA	100 (8)
MCRS1		other			0.00135	CDKN1A,TP53	83 (7)
ARHGAP1		other			0.00135	CDKN1A,TP53
PDZD2		other			0.00135	CDKN1A,TP53
TUBB1		other			0.00135	TUBB,TUBB2A
RACGAP1		transporter			0.00135	CD14,CDKN1A
BUB3		other			0.00135	CDKN1A,TP53	146 (4)
(+)-R-3-(4-chlorophenyl)-3-(1-hydroxymethylcyclopropylmethoxy)-2-(4-nitrobenzyl)-2,3-dihydroisoindol-1-one		chemical reagent			0.00135	CDKN1A,TP53
O-(chloroacetylcarbamoyl)fumagillol		chemical drug			0.00135	CDKN1A,TP53
10-decarbamoylmitomycin C		chemical toxicant			0.00135	CDKN1A,TP53
CXCL12	0.25	cytokine		-1.267	0.00137	CD14,CD47,CD9,DAD1,IGFBP7,JUN,JUNB,Ly6a (includes others),RHOC,RRAS,TF,TP53	187 (16)
IRAK4		kinase			0.00141	APP,BIRC3,CXCL16,EDN1,ERRFI1,JUN,NFKBIA	126 (15)
IFI16		transcription regulator		-1.328	0.00141	CD81,CDKN1A,EDN1,GPX1,ISG15,NFKBIA,SFTPD	217 (15)
CAMK2G		kinase			0.00142	BIRC3,CDKN1A,TP53	168 (17)
2,2-bis(4-hydroxyphenyl)-1,1,1-trichloroethane		chemical - endogenous mammalian			0.00142	CLU,IGF1,IGFBP5	208 (12)
interferon beta-1a		biologic drug			0.00142	BIRC2,LGALS1,NFKBIA,PPIA,RPL22,RPL27A,RPL3,RPS28,RPS7
resiquimod		chemical drug		-1	0.00142	APOBEC3B,CMTM8,CREB5,GPX1,HSPB1,IER3,ISG15,JUN,NFKB2,NFKBIA,PKM,RELB,SPP1,STMN1,TNIP1	164 (15)
Tnf (family)		group		-1.036	0.00142	BIRC2,BIRC3,CLDN2,CLDN4,CSF1,ENPP2,F3,IGF1,JUN,NFKBIA	188 (16)
SIRT6		enzyme			0.00147	ACSL3,BIRC3,CSF1,IGF1,RPL6,RPS15A	33 (3)
MAP2K4		kinase		-1.125	0.00147	BIRC3,CDKN1A,ERRFI1,JUN,TP53,TUBB2A	169 (17)
halofuginone		chemical drug			0.0015	CP,FSTL1,LGALS1,PKM,PRELP,SPARC,SPP1,TGFB3,TIMP2,USP2	84 (7)
NGF	-0.397	growth factor		-0.416	0.00151	AGRN,APP,BAMBI,CDKN1A,CRYAB,DUSP6,EEF1A1,ERRFI1,JUN,JUNB,Pvr,TNFRSF12A,TXN	205 (18)
levodopa		chemical - endogenous mammalian		1.065	0.00151	BICC1,C9orf24,CAPG,CD63,CLIC6,CMTM8,COMT,CRY2,CTXN1,DDIT4L,DUSP6,GSTM1,HLA-A,IER3,IGFBP5,JUNB,KLF6,LASP1,MRPL33,Oasl2,PFKP,RAP1GAP,S100A10,SPAG6,SYNE1,TP53,VAT1	176 (11)
HOXA5		transcription regulator			0.00157	CDKN1A,IGF1,TGFB3,TP53
IL5		cytokine		-1.014	0.00157	ALDOA,BIRC2,CD63,CD9,CDKN1A,CRIP1,DRC1,DUSP6,ENDOG,GLIPR2,IER3,PFKP,PKM,RAP1GAP,TUBB2B	146 (7)
etoposide		chemical drug		-0.897	0.00162	BIRC2,BIRC3,C9orf116,CDKN1A,EEF1A1,EEF1B2,IER3,JUN,NFKB2,RELB,SPHK1,TP53	171 (14)
N-Ac-Leu-Leu-norleucinal		chemical - protease inhibitor		-0.067	0.00163	APP,CDKN1A,HLA-A,IER3,NFKBIA,STMN1,TP53	191 (18)
JUNB	-0.607	transcription regulator		-1.964	0.00174	CLU,COMT,CXCL16,JUNB,MYL12A,NFKB2,PAK3,RELB,SFTPD,TIMP3	170 (13)
BNIP3L		other		-0.555	0.00176	CD47,GSN,NFKB2,NFKBIA,PKM,TIMP2	99 (7)
CGA		other		0.64	0.00178	BEX4,BIRC2,CTSV,PPIB,SCX,SERF2,TIMP2,TIMP3
ADCYAP1		other		0.277	0.00182	BCAM,CNN3,DNAH9,ENPP2,IER3,MAN1A1,NFKBIA,RHOB,RPSA,S100A10,SPARC,TGFB2,TUBB2B	229 (18)
SOX6		transcription regulator		0.341	0.00184	CDKN1A,HSPG2,NPM1,TP53	150 (7)
HEXIM1	0.278	transcription regulator			0.00184	CDKN1A,TGFB2,Tmsb4x (includes others),TP53	228 (16)
P2RY2		G-protein coupled receptor		-0.912	0.00184	CDKN1A,F3,JUN,TF	210 (19)
TOP1		enzyme			0.00186	CDKN1A,F3,TP53	161 (13)
UBA1		enzyme			0.00186	BIRC2,BIRC3,TP53	153 (7)
DDB2		other			0.00186	CDKN1A,NFKBIA,TP53	83 (7)
quinacrine		chemical drug			0.00186	BIRC2,CDKN1A,TP53	153 (16)
putrescine		chemical - endogenous mammalian			0.00186	CDKN1A,JUN,TP53	228 (12)
Fe2+		chemical - endogenous mammalian			0.00186	APP,GCLC,TF
CEBPA	0.332	transcription regulator		0.319	0.00191	ARL6IP5,CD14,CDKN1A,CSF1,FOXA2,IER3,IGF1,ISG15,JUN,JUNB,KRT7,LGALS1,Ly6a (includes others),PTGFR,SFTPD,SPP1,TGFB2,TIMP4,TSC22D3,TUBB2A	214 (18)
FOXP3		transcription regulator			0.00195	CAPG,CDKN1A,CSF1,DUSP6,HLA-A,JUN,LDHA,LGALS1,SDC4,TTR,TXN	198 (17)
fasudil		chemical drug		1.109	0.00195	CD14,F3,JUN,TGFB2,TGFB3	149 (13)
Insulin		group	Inhibited	-2.725	0.00199	ACTB,AEBP1,ALDOA,APP,CDKN1A,DBI,DNAJB4,EDN1,ENPP2,ERRFI1,GCLC,IGF1,ITGA3,JUN,LDHA,ME1,NFKBIA,PKM,PPIA,PPIB,RPS6	215 (18)
BMP2		growth factor		-1.853	0.00199	BSG,CDKN1A,CSF1,F3,IGFBP5,JUN,JUNB,NFAT5,SPARC,SPP1,TIMP3,TOB1	211 (19)
Pam3-Cys-Ser-Lys4		chemical reagent	Inhibited	-2.433	0.002	CD14,F3,HLA-A,IER3,JUN,NFKBIA,Pvr,RELB,TGFB2,TGFB3	176 (13)
PP2/AG1879 tyrosine kinase inhibitor		chemical - kinase inhibitor		0.894	0.00202	BIRC3,CDKN1A,CXCL16,EDN1,RHOC,SPP1,TP53	176 (18)
cobalt chloride		chemical reagent		-1.345	0.00202	ALDOA,CDKN1A,CLU,CP,PKM,SPHK1,TP53	213 (16)
Creb		group		-0.659	0.00202	ARPC5,CD14,CDKN1A,CLMN,COMT,CSRP1,CTSV,IER3,IGF1,JUN,JUNB,LASP1,SOX4,STMN1,TF,TGFB2	217 (13)
Interferon alpha		group	Inhibited	-2.669	0.00212	ANXA5,APOBEC3B,CD81,CDKN1A,DUSP6,ENPP2,F3,HLA-A,Ifi27,ISG15,NFE2L3,NFKBIA,NPM1,Oasl2,RABGAP1L,SAMD9L,SERPINB9,SLC5A1,SPRY1,TAPBP	176 (17)
Laminin (complex)		complex			0.00217	APP,BIRC3,RPSA,SDC4,TGFB2	98 (7)
pituitary adenylate cyclase-activating polypeptide		biologic drug			0.00217	BAMBI,CRYAB,DUSP6,ERRFI1,Pvr
15-deoxy-delta-12,14 -PGJ 2		chemical - endogenous mammalian		0.299	0.00221	BIRC2,BIRC3,CDKN1A,EHF,GCLC,GSN,HSPB1,JUN,NFKBIA,SPP1,TP53	171 (15)
thyroid hormone		chemical - endogenous mammalian		-0.478	0.00221	CDH4,CDKN1A,COMT,DAD1,DBI,IGF1,ME1,S100A10,Tmsb4x (includes others),TTR,UQCR10	168 (9)
STAT6		transcription regulator		0.148	0.00225	ACTB,AHNAK,BIRC2,CDKN1A,CLDN2,CRIP1,EFHD2,FLRT2,Gm12854/S100a11,GPM6B,IGF1,ISG15,Ly6a (includes others),NFKBIA,S100A10,SAMD4A,SPHK1,TMEM176B,USP2	209 (17)
rotenone		chemical toxicant		-1.387	0.00226	BIRC3,BSG,CLDN7,GPX1,TIMP2,TP53	206 (19)
Mapk		group		-1.195	0.00227	APP,CDKN1A,CLDN4,F3,IGF1,JUN,JUNB,SPP1	201 (19)
BCL2		transporter		-0.031	0.00227	CDKN1A,CTSH,GCLC,NFKBIA,SPHK1,TGFB2,TIMP2,TP53	209 (16)
GnRH analog		biologic drug		-1.343	0.00228	ANXA11,CAPNS1,CYB5A,DYNLL1,GSTO1,HEBP2,HSPA2,JUN,LRRC23,MLF1,NFKBIA,PPIA,RALA,TP53,TUBA1A,VAT1
mir-223		microRNA		0.552	0.0023	CSF1,CYB5A,GSTM5,IGF1,Ly6a (includes others),Mt2,MYOF,STMN1,TOB1
CDH1		other		-0.943	0.00232	ACTB,BIRC2,JUN,KRT18,KRT19,KRT7,RALA	77 (7)
3,4,5,3',4'-pentachlorobiphenyl		chemical toxicant		0.758	0.00232	COMT,CYB5A,HSPA2,JUN,PTGFR,SLCO3A1,UGT2B7
EIF2AK3		kinase	Inhibited	-2.207	0.0024	AARS1,BIRC2,BIRC3,IGF1,JUN,NFKB2,RELB,TP53	181 (19)
ZNF106		other	Activated	2.236	0.00241	COX7A2L,HSPB1,LGALS1,PRDX2,TNFRSF12A
3-deazaneplanocin		chemical drug		-1.698	0.00245	CDKN1A,KLF6,KRT7,TIMP3,TNS3,TSC22D3
PLN		transporter			0.00245	ACTB,ALDOA,ATP1A1,MYL6,RALA,RRAS
DTX1		transcription regulator		0	0.00246	DUSP6,LY6E,SPP1,TGFB2	185 (12)
VCP		enzyme		-0.152	0.00246	NFKB2,NPM1,PPIB,SYNE1
Mt1	1.37	other			0.00246	Gstt1,JUN,Mt1,NFKBIA	143 (10)
WR 1065		chemical drug		-0.655	0.00246	CDKN1A,NME1,TP53,ZFP36L1	206 (16)
rifaximin		chemical drug		1	0.00246	ANXA11,ANXA5,RPS7,RPSA
PIK3R1		kinase		0.022	0.00248	ATP1A1,F3,ISG15,LDHA,PKM,TGFB2,TGFB3	244 (13)
Jnk		group	Inhibited	-2.588	0.00251	ANXA5,APP,BIRC3,CLDN2,EDN1,F3,IGF1,JUN,JUND,KLF6,TNFRSF12A,TP53	193 (17)
CX3CL1		cytokine		-1.982	0.00254	CSF1,GSN,IGF1,MFGE8,SOX4,SPHK1,SPP1,TGFB2,TGFB3	201 (18)
EGR1		transcription regulator	Inhibited	-2.013	0.00261	APP,CDKN1A,CLU,CSF1,F3,JUN,JUNB,JUND,ME1,SPP1,TP53	238 (17)
isoproterenol		chemical drug		-0.824	0.00264	ACSL3,ALDH3B1,APP,ATP1A1,EDN1,JUN,JUNB,NGF,TIMP2,TUBB	170 (20)
NFYA		transcription regulator		-1.342	0.00264	CDKN1A,IGF1,JUN,JUNB,JUND,PKM,RHOB	122 (4)
ursodeoxycholic acid		chemical - endogenous mammalian		-0.64	0.00265	GCLC,NFKB2,SPARC,SPP1,TGFB2,TP53	147 (9)
SNAI2		transcription regulator		0.115	0.00265	ANKRD1,BSG,CDKN1A,EPCAM,ITGA3,KRT18
thymoquinone		chemical drug		1.131	0.00266	CD14,CDKN1A,CHUK,PKM,TP53	116 (12)
dimethylnitrosamine		chemical toxicant			0.00266	Calm1 (includes others),CDKN1A,IGFBP5,Mt1,Mt2
acetovanillone		chemical drug		0.728	0.00266	APP,EDN1,F3,GPX1,TXN	108 (12)
SNHG1		other			0.00267	CDKN1A,TP53
tozasertib		chemical drug			0.00267	CDKN1A,TP53	175 (10)
di-n-propyl disulfide		chemical reagent			0.00267	GSTM1,GSTM5
USP28		peptidase			0.00267	CDKN1A,TP53	170 (18)
K Channel		complex			0.00267	CDKN1A,TP53
tetrahydrocurcumin		chemical - endogenous mammalian			0.00267	APP,CDKN1A
proanthocyanidin derivative		chemical - other			0.00267	JUN,MFGE8
ANXA5	-1.06	transporter			0.00267	CDKN1A,F3	127 (14)
CALCR		G-protein coupled receptor			0.00267	CDKN1A,TP53	147 (10)
TOP3A		enzyme			0.00267	CDKN1A,TP53	50 (5)
GCLC	0.66	enzyme			0.00267	JUN,JUNB
FOXH1		transcription regulator			0.00267	ALDH1A1,FOXA2
LETMD1		other			0.00267	CDKN1A,TP53
PLAC8		other			0.00267	CDKN1A,TP53	139 (7)
NBN		other			0.00267	CDKN1A,CLU	108 (13)
azurin 50-77		biologic drug			0.00267	CDKN1A,TP53	160 (12)
phenylacetic acid		chemical - endogenous mammalian			0.00267	HLA-A,TIMP2
arzoxifene		chemical drug			0.00267	IGF1,TGFB3
4-methylcatechol		chemical - endogenous mammalian			0.00267	JUN,NGF
sertindole		chemical drug			0.00267	ACTB,APP
ethanol		chemical - endogenous mammalian		-1.572	0.00279	CD14,CDKN1A,CHUK,CLU,DUSP6,EDN1,HLA-A,JUN,KLF6,LGALS1,Pde4d,PHB,RHOB,TGFB2,TGFB3,TIMP2,TP53,TSC22D3	211 (21)
CASR		G-protein coupled receptor		-1	0.00281	CSF1,EDN1,IER3,IGFBP5,ISG15,LGALS1,TGFB2,TXN,WSB1	111 (3)
miR-29b-3p (and other miRNAs w/seed AGCACCA)		mature microRNA		1.152	0.00282	MLF1,SPARC,SRSF10,TGFB3,TP53,TUBB2A,ZFP36L1
IND S7		chemical - kinase inhibitor		0	0.00283	ACTB,ERP29,PRDX2,TUBB
ATF4	-0.307	transcription regulator		-1.021	0.00284	AARS1,ANKRD1,CDC42EP1,CDKN1A,EDN1,IGFBP5,IGFBP7,JUN,TGFB2,TNFRSF12A,TNIP1	168 (15)
bisindolylmaleimide I		chemical - kinase inhibitor		1.315	0.00284	BIRC3,CDKN1A,CLU,IGF1,JUND,Mt1,NFKBIA,TGFB3	168 (18)
hydroxyurea		chemical drug		-0.362	0.00287	BCAM,CDKN1A,EDN1,GPX1,KRT18,TP53	164 (19)
MYOD1		transcription regulator		1.773	0.0029	ALDOA,ANKRD1,CDKN1A,CRYAB,CYP2S1,ENPP2,FSTL1,HSPA4L,IGF1,IGFBP5,JUNB,KLF6,RRAS	218 (17)
VitaminD3-VDR-RXR		complex		-0.776	0.00293	CD14,CDKN1A,IGFBP5,SPP1,TGFB2
MEF2A	0.333	transcription regulator	Inhibited	-2.228	0.00293	CLIC6,EDN1,JUN,TGFB2,TGFB3
SPHK2		kinase			0.00298	APP,CDKN1A,TP53	184 (13)
GADD45B	-0.317	other			0.00298	BIRC2,CDKN1A,TP53	207 (22)
cetrorelix		biologic drug			0.00298	ANXA5,RPSA,TP53
pentobarbital		chemical drug			0.00298	JUN,JUNB,JUND	181 (16)
anti-benzo(a)pyrene-diol-epoxide		chemical toxicant			0.00298	CDKN1A,JUN,TP53	200 (20)
growth factor		group			0.00298	APP,CLU,SPHK1	164 (9)
NCOA3		transcription regulator	Inhibited	-2.624	0.00301	ANKRD1,CDKN1A,IGF1,LDHA,Muc1,NFKBIA,TGFB2	227 (18)
FADD		other		0.378	0.00301	BIRC3,CDKN1A,JUN,JUNB,KLF6,LY6E,SFXN2	181 (19)
tert-butyl-hydroquinone		chemical reagent		-0.87	0.00301	FLRT2,GCLC,GSTA3,GSTM5,JUN,JUNB,ME1	189 (13)
PML		transcription regulator		0.615	0.00302	ACTG1,CDKN1A,DNAJB4,DRC1,HSPB1,ISG15,ME1,STMN1,TP53,TXN	222 (16)
NKX2-3		transcription regulator		1.234	0.00302	ANKRD37,C2CD4B,CDKN1A,CRYAB,CXADR,CXCL16,DCLK1,EDN1,FLRT2,LY6E,RPS29,SAMD9L
CIP2A		other		1.633	0.00309	CRYAB,IER3,LASP1,PKM,RHOC,S100A16
cytarabine		chemical drug		-1.71	0.00309	CDKN1A,HLA-A,Pvr,TGFB2,TGFB3,TP53	219 (19)
FOXM1		transcription regulator	Inhibited	-2.049	0.00309	CDKN1A,IGF1,JUN,LDHA,NFKB2,PRDX2,SFTPD,STMN1,TP53	219 (20)
PRKAG3		other			0.00315	ANKRD1,DDIT4L,IGFBP5,JUNB,PPP1R14B,RHOU,RPL12,RPL22,RPL5,TPPP3
hyaluronic acid		chemical - endogenous mammalian	Inhibited	-2.021	0.00317	CTTN,JUN,NFKBIA,RHOC,SPHK1,SPP1,TGFB2,TIMP2	230 (23)
ZFHX3		transcription regulator			0.0032	CDC14A,HLA-A,RPS12,RPS28,TUBA1A,TUBB2B,UQCR10
MEL S3		chemical - kinase inhibitor		0	0.00322	ACTB,ERP29,PRDX2,TUBB
NFIC		transcription regulator			0.00322	ALDOA,CDKN1A,CSF1,TP53
nitroarginine		chemical reagent		-1.994	0.00322	Casp12,GCLC,JUND,SPP1	209 (15)
roscovitine		chemical drug		0	0.00322	APP,CD63,CDKN1A,RALA,TP53	174 (16)
quinolinic acid		chemical - endogenous mammalian	Inhibited	-2.172	0.00322	JUN,JUNB,JUND,NGF,TP53	220 (17)
P38 MAPK		group	Inhibited	-2.146	0.00327	ANXA5,CDKN1A,EDN1,F3,GCLC,IER3,IGFBP5,JUN,JUNB,NFAT5,NGF,RHOB,SPP1,TIMP2,TIMP3,TNIP1,TP53	184 (17)
SREBF1		transcription regulator		-1.339	0.00333	AARS1,ALDOA,CD14,CDKN1A,CSRP1,CXADR,CYB5A,DBI,RPLP0,RPS24,S100A13,TF,TP53	142 (7)
Pro-inflammatory Cytokine		group			0.00333	CD47,CLU,F3,GCLC,LGALS1,SDC4	84 (7)
Map3k7		kinase	Inhibited	-2.425	0.00333	EDN1,ISG15,JUN,NFKBIA,NGF,SPHK1	198 (13)
Ngf		group		-0.983	0.00333	APP,CDKN1A,CLU,JUN,TGFB2,TP53	191 (19)
filgrastim		biologic drug		1.261	0.00337	ACSL3,ANXA3,ATP1A1,BIRC3,CLU,COL27A1,DDAH2,ISG15,JUN,KLF6,LDHA,NME5,PRDX2,PSME2,RABGAP1L,RELB,S100A10,SPP1,ZFP36L1
ADRA1B		G-protein coupled receptor			0.00354	CDKN1A,CSRP2,CTSV,JUN,RALA	94 (12)
zVAD-FMK		chemical - protease inhibitor		0.931	0.00354	ANXA5,BIRC2,BIRC3,CDKN1A,TP53	168 (17)
valsartan		chemical drug	Activated	2.178	0.00354	APP,CYBA,EDN1,F3,SPP1	191 (17)
ADRB		group		-0.513	0.00357	ANKRD1,ANXA5,BCL10,CDKN1A,CRYAB,GSTA3,JUN,JUNB,NFKBIA	189 (19)
NRF1		transcription regulator		-0.355	0.00358	ATP1A1,CD47,GCLC,HPCAL1,Mt1,TP53
DKK1		growth factor		-0.2	0.00358	APP,CDKN1A,EPCAM,KRT18,SPARC,TP53	243 (20)
COLQ		other		1.387	0.00358	AGRN,CHRNB1,HSPG2,PRELP,SDC4,TGFB3
STAT5B		transcription regulator		-0.687	0.00365	AHNAK,ANKRD1,BIRC3,C2orf50,CDKN1A,DAPK1,FMO2,IGF1,KIF9,KRT19,ME1,RPL5,SPAG16,TF	168 (12)
FAAH		enzyme	Activated	2	0.00366	RPL5,RPL7,RPS2,RPS6
PML-RARA		fusion gene/product			0.00366	CDKN1A,F3,JUN,TP53	157 (9)
PNN		other			0.00366	BSG,CDKN1A,JUN
amlodipine		chemical drug			0.00366	EDN1,IGFBP5,S100A10	177 (7)
zinc protoporphyrin IX		chemical - endogenous mammalian			0.00366	CDKN1A,GCLC,IGF1	147 (7)
leupeptin		chemical - protease inhibitor			0.00366	APP,CD151,CD9
ETV6-RUNX1		fusion gene/product	Activated	2.395	0.00366	CYBA,IER3,ISG15,JUND,KLC3,KLF6,LGALS1,RABGAP1L,RELB,RPS6,RRAS,SORBS2,SPP1,STMN1,TSC22D3
diphtheria toxin		chemical - endogenous non-mammalian			0.00372	CD63,CRIP1,DUSP6,Gm12854/S100a11,LGALS1,RELB,RPL3,S100A10
Pka		complex		-1.331	0.00374	CD14,CDKN1A,EDN1,FOXA2,IGF1,JUN,JUNB,KLF6,NGF	178 (17)
erlotinib		chemical drug		-1.134	0.00384	CD14,F3,IGFBP7,NFKB2,NFKBIA,RELB,Tmsb4x (includes others)	83 (7)
PTH		other		-1.296	0.00389	AHNAK,CDKN1A,CSF1,CYBA,IGF1,IGFBP5,JUN,RAP1GAP,SDC4,SPP1	174 (21)
IL1		group	Inhibited	-3.327	0.00404	APP,CDKN1A,CP,CSF1,EDN1,F3,IGF1,JUN,KLF6,NGF,RELB,SDC4,SPARC,SPHK1,TGFB3,TP53	200 (16)
MAPK8		kinase		-1.709	0.00405	BIRC3,CDKN1A,CXCL16,DUSP6,GSTM1,JUN,JUND,KLF6,TP53,TSC22D3	173 (17)
SMARCB1		transcription regulator		-1.202	0.00405	CA8,CDKN1A,CSF1,CTTN,DAPK1,GSN,RAB36,SPARC,TMOD1,TP53
FOLR1		transporter			0.00408	BIRC3,CD9,DUSP6,EPCAM,RPS24,ST3GAL4,ST3GAL6
MECOM		transcription regulator			0.00413	CDKN1A,Ly6a (includes others),RPS6,SPARC	109 (11)
ACKR3		G-protein coupled receptor			0.00413	CDKN1A,IGFBP7,RRAS,STMN1	89 (9)
FBXW7		enzyme		1.455	0.00413	APP,HSPB1,JUN,NFE2L3,NFKB2,RHOB	174 (14)
SQSTM1		transcription regulator		0.283	0.00423	EDN1,GCLC,GSTM5,JUN,NFKBIA	158 (16)
PNPT1		enzyme	Activated	2	0.00423	AGRN,CDKN1A,ISG15,Oasl2,SAMD9L	76 (7)
ciprofibrate		chemical drug		-1.055	0.00428	BSG,CD63,CTSV,DBI,IGF1,NFKBIA,PAH,RPL12,TM4SF4	36 (3)
EPAS1		transcription regulator		-1.841	0.00431	BIRC3,Calm1 (includes others),CDC42EP5,CDKN1A,EDN1,GPX1,IGFBP5,LDHA,SFTPD,SPHK1,TGFB3,TP53	205 (16)
palmitic acid		chemical - endogenous mammalian		0.38	0.00431	ALDOA,BIRC3,CDKN1A,CYBA,EEF1A1,GCLC,IGF1,Mt1,Mt2,NFKBIA,SPHK1,TP53	208 (20)
IRF3		transcription regulator		-0.988	0.00434	AHNAK,APOBEC3B,BIRC2,BIRC3,ISG15,JUNB,Oasl2,PAH,RPS7,SAMD9L,TIMP3	125 (15)
MAPK1		kinase	Activated	2.009	0.00436	CDKN1A,Cetn4/Gm7094,DNAH7,EPCAM,ERP29,HLA-E,IGFBP7,ISG15,JUN,JUNB,JUND,LGALS1,MNS1,PSME2,SPAG16,SPP1,TP53	211 (21)
WNT3A		cytokine	Inhibited	-2.443	0.00438	APP,Casp12,DCLK1,EDN1,IGFBP5,JUN,RHOU,SDC4,SOX4,SPARC,SPRY1,TGFB2,TGFB3,TIMP3	241 (23)
Mst/krs		group			0.00438	NFKB2,RELB
teniposide		chemical drug			0.00438	CDKN1A,TP53
TPPP2		other			0.00438	CDKN1A,TP53	69 (7)
SMPD3		enzyme			0.00438	APP,IGF1	160 (11)
MELK		kinase			0.00438	CDKN1A,TP53	31 (3)
BCAS2		other			0.00438	CDKN1A,TP53
elocalcitol		chemical drug			0.00438	SPP1,TGFB2
ZDHHC2		enzyme			0.00438	CD151,CD9
2,3-bis(3'-hydroxybenzyl)butane-1,4-diol		chemical - endogenous mammalian			0.00438	SPARC,SPP1
7S NGF		complex			0.00438	CLU,GCLC
LUCAT1		other			0.00438	CDKN1A,TP53	31 (3)
NUP98		transporter			0.00438	CDKN1A,YWHAH
TYMS		enzyme			0.00438	CDKN1A,TP53	136 (7)
RNF34		enzyme			0.00438	CDKN1A,TP53	104 (10)
TIMP4	1.192	other			0.00438	TIMP2,TIMP4
PSAP		enzyme			0.00438	BIRC2,BIRC3
BRCA2		transcription regulator			0.00438	CDKN1A,TP53	80 (4)
BCAR3		other			0.00438	RALA,RRAS
GNL2		enzyme			0.00438	CDKN1A,TP53	133 (10)
GCLM		enzyme			0.00438	JUN,JUNB
plevitrexed		chemical drug			0.00438	CDKN1A,TP53
4-aminophenol		chemical - endogenous mammalian			0.00438	CLU,SPP1
ETS2		transcription regulator		-0.555	0.00443	CDKN1A,DUSP6,JUN,JUNB,KRT18,SPP1	200 (21)
FGF7		growth factor		-0.816	0.00443	CDKN1A,CSF1,NFE2L3,S100A10,SFTPD,TP53	168 (13)
RC3H1		enzyme	Activated	2	0.00443	ACTB,APOBEC3B,EDN1,HSPB1,ISG15,SPP1	135 (9)
MEF2D		transcription regulator		-1.698	0.00443	GCLC,JUN,JUNB,JUND,TGFB2,TGFB3
GnRH-A		chemical reagent		-1.698	0.00443	ANXA5,CDKN1A,JUN,JUNB,KLF6,SERPINB9	199 (21)
prostaglandin A2		chemical - endogenous non-mammalian			0.00444	CDKN1A,IGF1,TP53	197 (19)
GAS2L3		other			0.00444	CDKN1A,TM4SF1,TP53
MAPK8IP3		other			0.00444	APP,JUN,TF	84 (7)
NTF4		growth factor			0.00444	SPARC,SPP1,TUBA1A	77 (7)
miR-223-3p (miRNAs w/seed GUCAGUU)		mature microRNA			0.00444	CHUK,RHOB,STMN1
MAFG		transcription regulator			0.00444	GCLC,GSTA3,TP53
STIM1		ion channel			0.00444	GCLC,GPX1,GSTO1	27 (2)
HNRNPA2B1		other			0.00448	CP,CRIP1,CTSV,DCLK1,GSN,PKM,TGFB2,TNS3,UBXN10
PKD1		ion channel		0.149	0.0045	AADAC,ALDH1A1,ATP1A1,CDKN1A,CLDN10,CXCL16,KRT18,ODF3B,PAH,SYNE1,TTR
POU2F1		transcription regulator			0.00456	GSTM1,GSTM5,Gstt1,JUND,LY6E,PRDX2,SPP1,TIMP3
PLK1		kinase			0.00461	ANKRD1,CDKN1A,IER3,TGFB2,TGFB3	241 (17)
TAB1		enzyme	Activated	2	0.00464	BIRC3,CDKN1A,JUN,NFKBIA	181 (17)
CDX2		transcription regulator		1.748	0.00468	CD9,CDKN1A,CLDN2,CLU,FXYD3,JUN,KRT23,Muc1,SLC5A1
CSF3		cytokine		-0.853	0.00476	BIRC3,CAPG,CD14,DUSP6,EDN1,ENPP2,IGF1,JUN,Ly6a (includes others),TP53	196 (21)
GSK3B		kinase		-1.706	0.00479	APP,BIRC2,BIRC3,CDKN1A,NFE2L3,SPP1,TP53,TRAF3IP1	189 (18)
HDAC3		transcription regulator		-0.903	0.00485	BIRC3,CDKN1A,ENPP2,ME1,NFKBIA,RELB,SPP1	179 (15)
PC-SPES		chemical drug			0.00485	CD9,CDKN1A,CLU,DAD1,MYL6,TUBB2A,TXN
RTN4		other			0.00501	APP,JUN,JUND,RHOB,YWHAQ	141 (7)
CCN5		growth factor		0.447	0.00501	IGFBP7,JUN,KRT18,SDC4,SPARC
CDX1		transcription regulator		1.387	0.00501	CLDN2,CLU,FXYD3,KRT23,Muc1
2,3,4,7,8-pentachlorodibenzofuran		chemical toxicant		1.3	0.00501	COMT,CYB5A,HSPA2,PTGFR,UGT2B7
cyclic AMP		chemical - endogenous mammalian		0.609	0.00506	APP,CDKN1A,CRYAB,EPCAM,F3,IGF1,IGFBP5,JUN,JUNB,NGF,PAH,TF,TP53	220 (21)
EIF2AK2		kinase		0	0.00513	BIRC2,CDKN1A,ISG15,NFKB2,NFKBIA,TP53,TUBA1A	178 (14)
Fgf		group		-1.706	0.00519	IGF1,JUN,JUNB,Pvr	161 (17)
ARHGAP31		other		1	0.00519	JUN,SPARC,TGFB2,TGFB3
FOXO1		transcription regulator		-0.463	0.00527	ANXA3,BIRC3,CDKN1A,CTSV,DAPK1,DRC7,EDN1,FOXA2,GPX1,IER3,IGF1,IGFBP7,ITGA3,JUN,JUNB,ME1,SOX4,TP53,VPREB3	181 (16)
GNAQ		enzyme			0.00528	ANKRD1,ANXA3,CTSV,EDN1,RHOB,SPHK1,TGFB2,ZFP36L1	162 (10)
pCPT-cAMP		chemical - kinase inhibitor			0.0053	APP,JUN,JUNB	79 (7)
cryptotanshinone		chemical drug			0.0053	CD14,GCLC,TP53	137 (14)
PSMB8	-0.346	peptidase			0.0053	NFKB2,NFKBIA,PTGFR	70 (7)
DDX17		enzyme			0.0053	CDKN1A,JUN,NFAT5	163 (7)
silicon dioxide		chemical drug			0.0053	JUN,JUNB,SFTPD	162 (14)
NOTCH1		transcription regulator		-1.249	0.00538	ANKRD1,BIRC2,BIRC3,CD14,CDKN1A,Ly6a (includes others),NFKB2,RELB,RHOU,SPP1,TGFB2,TGFB3,TP53	184 (19)
NFATC2		transcription regulator		-0.853	0.00539	CDKN1A,CRYAB,EDN1,ENPP2,IER3,ISG15,JUN,LDHA,NFKBIA,RELB,SLCO3A1	209 (14)
Ifn gamma		complex		-0.649	0.00542	CDKN1A,CXCL16,EDN1,IGFBP5,Ly6a (includes others),PSME2,TGFB2	220 (17)
RGS2		enzyme		1.134	0.00542	ERP29,ERRFI1,F3,FXYD3,PDLIM4,PPIB,SPP1	141 (12)
SFRP1		transmembrane receptor		-1	0.00543	APP,EPCAM,KRT18,TGFB2,TP53	85 (7)
SMAD7		transcription regulator		1.285	0.00556	BIRC2,CDKN1A,EFEMP1,FOXA2,NFKBIA,TGFB2,TGFB3,TIMP3,TXN	177 (19)
triamcinolone acetonide		chemical drug		0.454	0.00558	B4GALNT1,CAPG,CXADR,JUN,JUNB,NFKBIA,SOX4,SPP1,SPRY1,TGFB2,TSC22D3	155 (7)
ERG		transcription regulator		-1.89	0.00558	BIRC3,CHRNB1,HPCAL1,RPL22,RPL27A,RPS11,RRAS,SOX4,SPARC,SPP1,TSC22D3
atorvastatin		chemical drug		0.529	0.00558	CYBA,EDN1,F3,IER3,JUN,JUNB,PDXK,RHOB,SPP1,TGFB3,TP53	211 (19)
S100A8		other		-1.929	0.00578	ALDH1A1,BIRC2,CP,CPM,ENPP2,EPCAM,IGF1,ISG15,NFKBIA,TRAF3IP1	198 (14)
ABCB4		transporter		1.997	0.00579	NFKB2,SPARC,SPP1,TGFB2
CHRNA7		transmembrane receptor		-0.152	0.00579	CDKN1A,TIMP2,TIMP3,TP53	241 (19)
IGF2BP1		translation regulator		-1.982	0.00579	ACTB,BIRC2,CDKN1A,LGALS1
ANXA2	-0.29	other		-0.784	0.00579	CDKN1A,JUN,S100A10,TP53	190 (17)
DNASE2		enzyme			0.00579	CP,ISG15,Ly6a (includes others),Oasl2
SELP		transmembrane receptor		-1.103	0.00579	CDKN1A,F3,IGF1,SERPINB9	222 (19)
TIMP1		cytokine		-1	0.00579	CDKN1A,TIMP2,TIMP3,TP53	198 (18)
LOC105372576		other		1	0.00579	DYNLL1,EDN1,TIMP3,TNFRSF12A
reactive oxygen species		chemical toxicant		-1.243	0.0058	CDKN1A,EDN1,F3,JUN,KLF6,PHB,PRDX5,TP53	194 (18)
MAP3K1		kinase		-1.922	0.00589	BIRC2,BIRC3,HSPB1,JUN,TP53	170 (17)
STAT1		transcription regulator		-1.497	0.00599	APOBEC3B,CD14,CDKN1A,EDN1,HLA-E,IGF1,ISG15,JUN,Ly6a (includes others),LY6E,Oasl2,PSME2,S100A10,SAMD9L,TAPBPL,TP53	217 (19)
MKNK1		kinase		-1.134	0.00604	AGRN,ANXA5,CP,HSPA2,HSPA4L,ISG15,SPARC
MAP3K8		kinase		-0.063	0.00605	BIRC3,DUSP6,FAM107B,IER3,JUN,JUNB,NGF,TAPBPL,TUBB2B	197 (19)
PLG		peptidase		-1.706	0.00615	CSF1,CYP2S1,EDN1,F3,MFGE8,RALA	159 (13)
FOSL1		transcription regulator			0.00615	GCLC,JUN,JUNB,SFTPD,SPARC,TF	83 (8)
cerivastatin		chemical drug			0.00615	CDKN1A,DBI,F3,GPX1,HSPB1,JUN	164 (18)
PKNOX2		transcription regulator			0.00626	CDKN1A,IGFBP5,TP53
hemoglobin		complex			0.00626	CDKN1A,EDN1,ME1
Endothelin		group			0.00626	APP,EDN1,JUN	191 (18)
PLA2G4A		enzyme			0.00626	ANXA5,GSTM5,KRT18
S1PR2		G-protein coupled receptor			0.00626	F3,JUN,SPHK1	155 (18)
superoxide		chemical - endogenous mammalian			0.00626	CLU,CYBA,MARCKSL1
indirubin		chemical drug			0.00626	BIRC2,BIRC3,JUN	162 (10)
acadesine		chemical drug			0.00626	CDKN1A,F3,TP53	164 (16)
17-alpha-ethinylestradiol		chemical drug		-1.673	0.0063	AARS1,CDKN1A,F3,IGF1,JUN,KRT19,KRT7,NME1,TGFB3	232 (21)
FGF10		growth factor		-1.133	0.00636	AHNAK,ANXA3,CTSH,S100A13,TIMP3
Ccl2		cytokine	Inhibited	-2.213	0.00636	CD14,CSF1,CTSV,IGF1,SDC4	193 (17)
bicuculline		chemical - endogenous non-mammalian		-1.446	0.00636	APP,DUSP6,JUN,JUNB,PKM	172 (14)
PSEN2		peptidase		-0.404	0.00636	ACTB,ANXA5,APP,CD9,ENPP2,HLA-E,TP53	221 (16)
CREB1		transcription regulator		-0.667	0.00639	ATP1A1,CD9,CDKN1A,CSRP2,EDN1,ERRFI1,FRMD6,HLA-A,HPCAL1,IER3,JUN,JUNB,MARCKSL1,MNS1,MYH10,PDXK,Pvr,SRSF10,STMN1,TF,TPT1,TXN	180 (14)
SETD2	0.264	enzyme	Activated	2	0.00643	IGF1,JUN,RHOB,SEMA3C
NGFR		transmembrane receptor		-1.131	0.00643	APP,JUN,NGF,RHOB	205 (18)
formaldehyde		chemical - endogenous mammalian		-1	0.00643	Gstt1,JUN,JUNB,JUND	194 (18)
choline		chemical - endogenous mammalian		1	0.00643	CDKN1A,ERRFI1,SPP1,TP53	189 (20)
SPP1	-0.304	cytokine		-0.376	0.00647	CAPNS1,CD9,CDKN1A,COX7A2L,IGF1,ITGA3,KRT18,SPP1,TP53,VAT1	196 (16)
ganciclovir		chemical drug			0.00648	CDKN1A,TP53
Rp-8-pCPT-cGMPS-triethylamine		chemical reagent			0.00648	CDKN1A,S100A10
2,5-bis(5-hydroxymethyl-2-thienyl)furan		chemical reagent			0.00648	CDKN1A,TP53
Tcf 1/3/4		group			0.00648	AMBP,TTR
DOHH		enzyme			0.00648	NME1,PRDX2
KLF17		transcription regulator			0.00648	CDKN1A,TP53
RASSF3	-0.576	other			0.00648	CDKN1A,TP53
BPIFB1		other			0.00648	NFKBIA,PHB
nomilin		chemical - endogenous non-mammalian			0.00648	CDKN1A,TP53
TFPI		other			0.00648	CDKN1A,F3	104 (9)
RALB		enzyme			0.00648	CDKN1A,TP53	83 (7)
BCL2L12		other			0.00648	CDKN1A,CRYAB
EIF5A	-0.298	translation regulator			0.00648	CDKN1A,TP53
ERCC1		enzyme			0.00648	CDKN1A,IGF1	140 (7)
MAGED1		transcription regulator			0.00648	CDKN1A,JUN	202 (18)
PEBP4		other			0.00648	CDKN1A,TP53
CHD3	-0.377	enzyme			0.00648	CHD3,RPS6
SFTPC		other			0.00648	FOXA2,SFTPD
Ifna4		other			0.00648	ISG15,TP53
CXXC4		other			0.00648	CDKN1A,SPARC
6,7-dinitroquinoxaline-2,3-dione		chemical reagent			0.00648	JUN,JUNB	138 (7)
6-cyano-7-nitroquinoxaline-2,3-dione		chemical reagent			0.00648	JUN,JUNB
octyl gallate		chemical reagent			0.00648	APP,GPX1
sparfosic acid		chemical drug			0.00648	CDKN1A,TP53
rottlerin		chemical toxicant		1.962	0.00654	APOBEC3B,BIRC3,CDKN1A,CLDN4,CLDN7,JUN	219 (19)
ID2		transcription regulator		0.081	0.00663	CDKN1A,CSF1,ITGA3,KLF6,LGALS1,NFAT5,RAP1GAP,RELB,SOX4,TF,TUBA1A
KLF11		transcription regulator		1	0.00667	CHRNB1,EDN1,ITGA3,TGFB2,TGFB3,TIMP2,TIMP3,TIMP4	76 (7)
Nr1h		group	Activated	2.155	0.00684	ACSL3,ALDH1A1,CSF1,EDN1,MARCKSL1,NFKB2,SYT7,TIMP3,TP53	98 (10)
PTPN11		phosphatase		-0.339	0.00696	BSG,CD14,CDKN1A,CSF1,JUN,TP53	222 (22)
fenretinide		chemical drug		0.128	0.00696	ANKRD1,BIRC2,IGF1,IGFBP7,JUN,NFKBIA	164 (11)
SP3		transcription regulator		0.243	0.00709	AEBP1,CD2AP,CDKN1A,F3,IGF1,JUN,PKM,RRAS,SPARC,TIMP2,TP53	175 (11)
GTF2B		transcription regulator			0.00711	ACTB,CDKN1A,IGF1,NFKBIA	114 (3)
PF4		cytokine		-0.277	0.00711	CDKN1A,CPM,F3,SPHK1	127 (12)
kainic acid		chemical toxicant	Inhibited	-2.234	0.00712	APP,ERRFI1,JUN,JUNB,JUND,NGF,SLC39A4,SPP1,TP53	214 (20)
IRF4		transcription regulator		1.726	0.00722	BIRC3,CDC14A,DBI,ISG15,PPIB,RHOB,RPL6,SPP1,YWHAH,ZFP36L1
ITGB4		transmembrane receptor			0.00732	ENPP2,SPARC,TP53
RAE1		other			0.00732	CDKN1A,SOX4,TP53
ethoxyquin		chemical toxicant			0.00732	GCLC,GSTA3,GSTM5
diethylmaleate		chemical toxicant			0.00732	BIRC2,CDKN1A,NFKBIA	171 (13)
vitamin K2		chemical drug			0.00732	CD14,CSF1,SPP1
C3	-0.581	peptidase		0.302	0.00739	APP,CHUK,CSF1,CXCL16,JUN,TTR	191 (18)
CLEC4G		other		-1.342	0.0074	CSF1,MFGE8,MLF1,PDGFD,TGFB3
NCOR2	0.364	transcription regulator			0.0074	BIRC3,CDKN1A,IGF1,JUN,RELB	184 (18)
arachidonic acid		chemical - endogenous mammalian		-0.646	0.00743	CLU,EDN1,F3,JUN,KLF6,NFKBIA,SPP1	200 (18)
NR4A1		ligand-dependent nuclear receptor		0.124	0.00745	ALDOA,CSF1,DAPK1,EHF,EPCAM,GSTM5,KRT18,Ly6a (includes others),LY6E,MARCKSL1,Mt1,NFKBIA,TGFB3	213 (16)
FGFR3		kinase			0.00784	CDKN1A,DUSP6,SPARC,SPP1	198 (16)
HSF2		transcription regulator			0.00784	CLU,HSPB1,JUN,TXN
alvocidib		chemical drug		-0.697	0.00784	BIRC3,CDKN1A,TP53,TXN	177 (20)
MXD1		transcription regulator	Activated	2.449	0.00784	COX7A2L,EDN1,Rpl23a,RPL3,RPS2,RPSA	184 (7)
miR-34a-5p (and other miRNAs w/seed GGCAGUG)		mature microRNA		1.794	0.00796	APP,B4GALNT1,CD47,CDKN1A,EFEMP1,SAMD9L,SLCO3A1,TP53
CD38		enzyme		-0.513	0.00801	ALDOA,CRIP1,DRC1,ENDOG,GLIPR2,PFKP,PKM,RAP1GAP,TUBB2B
5-N-ethylcarboxamido adenosine		chemical reagent		1.134	0.00821	DAD1,EPCAM,FOXA2,GCLC,JUNB,KLF6,USP2	85 (7)
FFAR3		G-protein coupled receptor		0.816	0.00831	AMBP,ENPP2,FXYD3,MLPH,RCN1,TP53
mir-17		microRNA		-0.295	0.00831	APP,BIRC2,BIRC3,CDKN1A,GCLC,USP2	169 (12)
TGFA		growth factor		-1.534	0.00831	BIRC3,CDKN1A,ERRFI1,JUNB,S100A10,TP53	190 (17)
delta-9-tetrahydrocannabinol		chemical drug			0.00831	BIRC2,DUSP6,NGF,PRDX2,RPS9,TP53	198 (17)
MAPK14		kinase		-1.68	0.00833	ANKRD1,CRYAB,DUSP6,EFEMP1,JUN,JUNB,JUND,SPP1,TIMP2,TP53	155 (20)
methylselenic acid		chemical reagent			0.00843	ACSL3,BIRC2,BIRC3,CDKN1A,CLU,DYNLL1,IGF1,JUN,JUNB,RHOB,TUBB4B,UGT2B7	162 (17)
SAV1		other			0.00848	CDKN1A,SOX4,SPP1	15 (3)
TIMP2	-0.557	other			0.00848	CDKN1A,NFKBIA,TIMP2	164 (13)
mir-192		microRNA			0.00848	CDKN1A,IGF1,TP53	140 (7)
LY6E	-0.592	other			0.00848	CD14,NFKBIA,RELB
HRG		other			0.00848	SPARC,SPP1,TIMP3
CSNK2A1		kinase			0.00848	DUSP6,ITGA3,TP53	158 (12)
EML4-ALK		fusion gene/product			0.00848	PTP4A1,SPARC,TGFB3
Calmodulin		group		0.447	0.00854	ARPC5,Calm1 (includes others),CTXN1,F3,NGF	70 (7)
NQO1		enzyme		-0.849	0.00862	BIRC2,BIRC3,CDKN1A,TP53	200 (17)
SUMO3		other		1.732	0.00862	APP,CXCL16,ISG15,LY6E	72 (7)
CD40		transmembrane receptor		-1.956	0.00863	BIRC3,CDKN1A,CSF1,DUSP6,F3,JUN,Ly6a (includes others),NFKB2,NFKBIA,TAPBP,TP53	172 (14)
GMNN	0.334	transcription regulator		1	0.0088	CDKN1A,EFEMP1,FOXJ1,Oasl2,TGFB2,TP53
zinc		chemical drug		-0.478	0.0088	Mt1,NFKBIA,NGF,NPM1,SLC39A4,TP53	154 (10)
E. coli B4 lipopolysaccharide		chemical toxicant		-0.009	0.00882	ANXA11,CALML4,F3,HLA-A,Ly6a (includes others),NFKBIA,Oasl2,RELB,RHOC,RPL7,TF,TP53,TTR	172 (17)
(6)-gingerol		chemical - endogenous non-mammalian			0.00895	CDKN1A,TP53	191 (15)
nicotinic acetylcholine receptor		complex			0.00895	JUN,JUNB	83 (7)
ATE1		enzyme			0.00895	ACTB,JUN
MED28		other			0.00895	AEBP1,CRIP1
PCM1	0.29	other			0.00895	CDKN1A,TP53
JDP2		transcription regulator			0.00895	JUN,TP53	178 (12)
SERPINC1		enzyme			0.00895	F3,HSPG2
IER3	-0.531	other			0.00895	BIRC2,BIRC3	100 (8)
mir-449		microRNA			0.00895	DNAH6,TUBB4B
PDE3A		enzyme			0.00895	CDKN1A,TP53	108 (7)
FZD5		G-protein coupled receptor			0.00895	CD14,SPP1
TP53INP1	0.465	other			0.00895	CDKN1A,SPARC
PPM1A		phosphatase			0.00895	CDKN1A,TP53	196 (17)
DMTF1		transcription regulator			0.00895	CDKN1A,TP53
SUPT5H		transcription regulator			0.00895	ANKRD37,CDKN1A
MED13L		other			0.00895	ANKRD1,ARMC4
glyceraldehyde-BSA		chemical reagent			0.00895	CDKN1A,TP53
methylglyoxal-BSA		chemical reagent			0.00895	CDKN1A,TP53
Hmgb2 (includes others)		transcription regulator			0.00895	NFKB2,TGFB3
PSENEN		peptidase			0.00895	APP,TP53	121 (3)
dacarbazine		chemical drug			0.00895	CDKN1A,TP53	170 (12)
diquat		chemical toxicant			0.00895	Mt1,Mt2
gliotoxin		chemical toxicant			0.00895	BIRC3,IER3	87 (9)
NR1I3		ligand-dependent nuclear receptor		-0.056	0.00905	ALDH1A1,CDKN1A,FAM107B,GSTM1,GSTM5,Gstt1,Mt1
APC		enzyme		-0.283	0.00906	CDKN1A,CLU,EDN1,IGF1,IGFBP5,SPP1,TNFRSF12A,TP53	221 (15)
CHD4		enzyme		0.555	0.00916	CDKN1A,JUN,SPRY1,TIMP2,TP53
dalfampridine		chemical drug		-1.446	0.00916	APP,DUSP6,JUN,JUNB,PKM	143 (7)
nicotine		chemical drug		-0.5	0.00924	ALDOA,CDKN1A,DBI,EDN1,IGF1,JUNB,RPSA,SPP1,TP53,TTR	241 (22)
TFAP4		transcription regulator		1	0.00944	CDKN1A,CLDN4,CLDN7,MLF1
berberine		chemical drug		1.709	0.00949	BIRC2,BIRC3,BSG,CDKN1A,ENDOG,SPHK1,TP53	177 (18)
HOXA11		transcription regulator			0.00974	CD47,CTSV,SPP1
MED12		transcription regulator			0.00974	ANKRD1,ARMC4,CREB5
MAT1A		enzyme			0.00974	KRT18,Mt1,PHB
SCX	-0.46	transcription regulator			0.00974	SCX,SPP1,TIMP3
PD 169316		chemical - kinase inhibitor			0.00974	BIRC3,CDKN1A,TIMP3	184 (14)
retinol		chemical drug			0.00974	JUN,TF,TGFB2	105 (7)
Zn2+		chemical - endogenous mammalian			0.00974	APP,Mt1,Mt2	141 (7)
BCL6		transcription regulator		-0.3	0.00978	CD151,CDKN1A,CSF1,DUSP6,GSTM5,ITGA3,JUNB,KLF6,Ly6a (includes others),SH2D4A,TP53	228 (21)
AGN194204		chemical drug		-0.653	0.00978	ANXA11,ATP1A1,CDKN1A,Crip2,CSRP1,CYB5A,FOXA2,KLF6,LGALS1,MAN1A1,SPP1
IL10		cytokine		-0.651	0.00992	CD14,CD63,CDKN1A,CHUK,CSF1,CTSH,CTSV,CXCL16,EHF,F3,FLRT2,JUN,LGALS1,MAN1A1,SPP1,TINAGL1,TSC22D3,TUBB4B	215 (20)
PRKAA2		kinase		0.051	0.00995	CDKN1A,LDHA,Ly6a (includes others),NFKBIA,TNS3,TP53,ZFP36L1	220 (19)
Hdac		group		-0.191	0.0101	CDKN1A,EDN1,IGF1,JUN,KLF6,PKHD1,SEMA3C,SPP1,SPRY1
ITGB1		transmembrane receptor		1.151	0.0103	CDKN1A,COL27A1,HSPG2,ITGA3,JUN,JUNB,TIMP2,TP53
ATP7B		transporter			0.0103	APP,CP,Mt1,Mt2
DACH1		transcription regulator		0.218	0.0103	CDKN1A,EFEMP1,JUN,PAK3
Cdc42	-0.25	enzyme		0	0.0103	CSF1,CTSH,CTSV,STMN1
carbamylcholine		chemical drug		0.849	0.0103	APP,CDKN1A,CHUK,JUN
tetraethylammonium		chemical drug		0.762	0.0103	EFHD2,GSTO1,HSPB1,RPLP0
LYN	0.339	kinase			0.0104	CDKN1A,CSF1,NFKB2,NFKBIA,SPHK1,TGFB3
TREM1		transmembrane receptor		-1.373	0.0106	ACSL3,CD14,CSF1,EDN1,F3,ISG15,NFKB2,NFKBIA,RHOU,SPP1
MTOR		kinase		-1.946	0.0108	CDKN1A,DDAH2,GSTM5,HSPB1,IGF1,LDHA,PFKP,PKM,PPIB,PRDX5,RPL12,RPS11,RPS6,SOX4,TP53
mir-1		microRNA	Activated	2.621	0.0109	CNN3,EDN1,IGF1,LASP1,PPIB,TNS3,ZFP36L1
RET		kinase		-1	0.0109	CD151,CLU,CSF1,CTSV,DUSP6,TIMP3,TP53
LMNA		other		-1	0.0109	ANKRD37,BAMBI,EDN1,FOXA2,GCLC,JUN,JUND,KRT18,RPS21,SPP1,TIMP2,TIMP3
ERBB4		kinase		0.128	0.011	CDKN1A,IGFBP5,JUN,TIMP3,Tmsb4x (includes others),TP53
MAPK13		kinase			0.0111	CDKN1A,EFEMP1,TP53
MAP3K5		kinase			0.0111	CDKN1A,JUN,TP53
GADD45A		other			0.0111	BIRC2,CDKN1A,JUN
IND S1		chemical - kinase inhibitor			0.0111	ACTB,PRDX2,TUBB
beta-glycerophosphoric acid		chemical - endogenous mammalian			0.0111	CDKN1A,SPARC,SPP1
triptolide		chemical drug		1.024	0.0111	BIRC2,CDKN1A,IER3,JUN,RHOC,SERPINB9,SOX4,TP53
CD3		complex	Inhibited	-3.317	0.0112	AARS1,BAMBI,BIRC3,CYBA,DAD1,FKBP3,IGF1,IGFBP5,JUN,JUNB,Ly6a (includes others),NFAT5,NFKBIA,NME1,NPM1,PHB,PTP4A1,RELB,RHOC,RPL6,STMN1,SYT7,ZFP36L1
IL6ST	-0.305	transmembrane receptor		1.067	0.0112	CLDN2,ENPP2,JUN,JUNB,Muc1
NORAD		other	Inhibited	-2	0.0112	JUN,JUNB,RHOB,TNFRSF12A
ANXA1		enzyme		0.068	0.0112	CSF1,SPHK1,TIMP2,TSC22D3
H-7		chemical - kinase inhibitor		-0.192	0.0112	ISG15,JUNB,Mt1,TP53
PPARGC1A		transcription regulator		1.21	0.0116	CDC42EP1,CDKN1A,EDN1,ENDOG,GPX1,IGFBP5,IGFBP7,LDHA,ME1,PRDX5,SEMA3C,TIMP2,TIMP3,TNFRSF12A,TP53
IKBKE		kinase		-0.346	0.0116	BIRC2,BIRC3,FOXA2,HLA-A,LDHA,NFKBIA
2-amino-5-phosphonovaleric acid		chemical - other		-0.332	0.0116	ANKRD37,DUSP6,JUN,JUNB,NHSL1,NUDT4,RELB,RPS15A
5-azacytidine		chemical drug		-1.369	0.0116	CDKN1A,F3,KLF6,Ly6a (includes others),Mt1,PAH,RHOB,SPHK1,TUBB
Vhl		complex			0.0118	BIRC2,BIRC3
saikosaponin A		chemical reagent			0.0118	JUN,JUNB
ganglioside GM1		chemical - endogenous mammalian			0.0118	APP,NGF
citrinin		chemical toxicant			0.0118	JUNB,TP53
TRPC4AP		transporter			0.0118	APP,NPM1
NELFCD		other			0.0118	BSG,JUNB
LTBP4		growth factor			0.0118	TGFB2,TGFB3
GRK5		kinase			0.0118	APP,TP53
TTN		kinase			0.0118	Calm1 (includes others),CRYAB
miR-138-5p (miRNAs w/seed GCUGGUG)		mature microRNA			0.0118	KRT19,RHOC
SMARCA1		transcription regulator			0.0118	CDKN1A,TP53
MTBP		other			0.0118	CDKN1A,NPM1
SDC2		other			0.0118	CDKN1A,TP53
CLTC		other			0.0118	CDKN1A,HLA-A
BLM		enzyme			0.0118	CDKN1A,TP53
TERF2		transcription regulator			0.0118	CDKN1A,TP53
TAPBP	-0.362	transporter			0.0118	HLA-A,HLA-E
farnesyl transferase		complex			0.0118	CRYAB,KLF6
ethyl 2-{[(6,7-dimethyl-3-oxo-1,2,3,4-tetrahydro-2-quinoxalinyl)acetyl]amino}-4,5-dimethyl-3-thiophenecarboxylate		chemical reagent			0.0118	CDKN1A,TP53
diltiazem		chemical drug			0.0118	EDN1,JUN
ciclopirox olamine		chemical drug			0.0118	CDKN1A,TF
N-methyl-3,4-methylenedioxyamphetamine		chemical drug			0.0118	Mt1,Mt2
MDL 28170		chemical toxicant			0.0118	APP,TP53
dihematoporphyrin ether		chemical drug			0.0118	CDKN1A,TP53
MMP12		peptidase			0.0119	APP,ARPC1B,NFKBIA,PKM,YWHAH
DDX5	0.268	enzyme		0.47	0.0119	CDKN1A,JUN,NFAT5,TP53,UQCR10
calcimycin		chemical reagent		0.107	0.0119	APP,CD14,IGF1,JUN,JUNB,NGF,TP53
COL18A1		other		1.664	0.0122	EDN1,F3,JUN,JUNB,LDHA,TUBA1A
SP1		transcription regulator		-0.412	0.0122	AEBP1,CDKN1A,CRYAB,F3,IGF1,JUN,KLF6,KRT18,KRT19,Mt1,NFKBIA,PKM,RRAS,SLC5A1,SPARC,SPP1,TGFB2,TIMP2,TIMP3,TIMP4,TP53
SUMO2		enzyme	Activated	2	0.0122	CXCL16,ISG15,LY6E,TSC22D3
CSF1R		kinase			0.0122	CDKN1A,CSF1,JUN,JUNB
EFNA4		kinase		0	0.0122	DUSP6,FOXA2,KRT18,KRT7
cyclopamine		chemical reagent		1.225	0.0122	CD14,CDKN1A,SPARC,SPP1
NADPH oxidase		complex			0.0126	EDN1,F3,JUN
MGP		other			0.0126	PAH,SPP1,TTR
IGFBP5	1.084	other			0.0126	F3,IGF1,TP53
IREB2		translation regulator			0.0126	APP,LDHA,TP53
dipyridamole		chemical drug			0.0126	SPP1,TIMP2,TP53
Ro41-5253		chemical reagent			0.0126	CDKN1A,F3,TGFB2
diallyl trisulfide		chemical - endogenous non-mammalian			0.0126	CDKN1A,JUN,TP53
FOXL2		transcription regulator		-1.432	0.0127	CPM,IER3,IGF1,SOX4,SPRY1
OTX2		transcription regulator		1	0.0127	CDH4,ENPP2,SEMA3C,TF,TTR
folic acid		chemical - endogenous mammalian		1.103	0.0127	APP,CDKN1A,CLU,JUN,TP53
glucocorticoid		chemical drug		-0.951	0.0128	CDKN1A,CLU,CRIP1,CSF1,EDN1,Mt1,NFKBIA,NGF,PAH,SPP1,TGFB2,TP53,TSC22D3
wortmannin		chemical - kinase inhibitor		0.526	0.0128	CD14,CDKN1A,CSF1,CXCL16,F3,GCLC,IGF1,JUN,NFKBIA,TP53
GH1		growth factor		-0.245	0.013	CLU,DBI,IGF1,JUN,JUNB,RPL6,SPP1
KLF3		transcription regulator	Activated	2.673	0.0131	AHNAK,ALDH3B1,ANXA5,CAPG,CAPNS1,CHCHD10,ELOF1,GLIPR2,Ifi27,PFKP,PLPP2,TUBA1A,VPREB3,WSB1
VEGFB		growth factor		1.032	0.0133	Casp12,GPX1,PRDX5,TP53
RPS6KB1		kinase			0.0133	ATP1A1,CDKN1A,ISG15,TP53
EFNA3		kinase		0	0.0133	DUSP6,FOXA2,KRT18,KRT7
D-galactosamine		chemical - endogenous mammalian	Inhibited	-2	0.0133	CD14,JUN,JUNB,JUND
Ca2+		chemical - endogenous mammalian		-0.239	0.0133	APP,CDKN1A,CSRP1,CTTN,EDN1,ITGA3,JUN,JUNB,JUND,NFKBIA,SPP1,TIMP2
ZFP36		transcription regulator		1.347	0.0135	BIRC3,CDKN1A,IER3,JUN,NFKBIA,SPP1
TRAF3		enzyme		1.633	0.0135	BIRC3,EPCAM,ISG15,NFKB2,NFKBIA,RELB
POU2F2		transcription regulator	Inhibited	-2	0.0135	JUN,LY6E,RPS2,SPP1,TIMP2,TNFRSF12A
R5020		chemical reagent		-1	0.0135	BIRC3,CDKN1A,F3,IER3,NFKBIA,TIMP2
IFN Beta		group		-1.151	0.0135	CDKN1A,EEF1A1,HLA-A,ISG15,Mt2,SPRY1,TAPBP,TP53
infliximab		biologic drug		1.109	0.0135	APP,EDN1,NFKB2,NFKBIA,SPHK1
TSH		complex		-0.447	0.0135	CDKN1A,ERP29,IGFBP5,JUNB,Mt1
EGLN1		enzyme		1	0.0135	EDN1,NGF,SDC4,TGFB2,TGFB3
miR-122-5p (miRNAs w/seed GGAGUGU)		mature microRNA		0.083	0.0135	ALDOA,ANXA11,EEF1A1,PKM,PRDX2
TCF4		transcription regulator	Inhibited	-3.043	0.0135	CD9,CDKN1A,EDN1,EPCAM,Ifi27,IGFBP5,ITGA3,JUN,Ly6a (includes others),RHOC,RPL7,SAMD9L,SORBS2,SPP1,TAPBPL,TNS3
cholecalciferol		chemical - endogenous mammalian	Inhibited	-2.298	0.0136	CD14,CSF1,EDN1,IGF1,JUN,ME1,SPP1
ARNT2		transcription regulator		-1.897	0.0141	CYBA,FKBP3,GSTA3,HLA-A,NUDC,PDLIM4,SYT7,TSC22D3,USP2,ZFP36L1
dexamethasone phosphate		chemical drug			0.0141	ERRFI1,Mt1,NFKBIA
zerumbone		chemical - endogenous non-mammalian			0.0141	BIRC2,BIRC3,TP53
ADCY		group			0.0141	CDKN1A,TP53,TXN
MAP3K3		kinase			0.0141	JUN,TGFB2,TGFB3
SAFB2		other			0.0141	CHD3,HLA-E,JUN
TGFB1I1		transcription regulator			0.0141	CDKN1A,KRT18,KRT19
NTRK1		kinase			0.0141	CDKN1A,LGALS1,TP53
SIX5		transcription regulator			0.0141	ATP1A1,IGFBP5,KRT18
GNL3		other			0.0141	CDKN1A,KRT18,TP53
carvedilol		chemical drug			0.0141	CYBA,F3,TIMP2
paroxetine		chemical drug			0.0141	ANKRD37,APP,TP53
ADAM10		peptidase			0.0142	APP,CRYAB,CSF1,CXCL16,DCLK1,HIPK1
FGF8		growth factor		-0.186	0.0142	CRIP1,CRYAB,DDAH2,ERRFI1,SPARC,SPP1
aspirin		chemical drug	Activated	2.345	0.0143	APP,CDKN1A,CSF1,CYB5A,IER3,RHOC,SERPINB9,SOX4,TP53
ACVR1		kinase			0.0143	CDKN1A,CSRP2,FSTL1,SAMD9L
SKIL		transcription regulator		-1.982	0.0143	CDKN1A,CLDND1,FOXA2,VAT1
HBEGF		growth factor		0	0.0143	ALDOA,ANKRD37,LDHA,PKM
advanced glycation end-products		chemical - endogenous mammalian			0.0143	BSG,CDKN1A,DDAH2,SPP1
vitamin E		chemical drug		1.513	0.0144	Casp12,CDKN1A,F3,KLF6,SPP1
POLR2A		enzyme			0.0144	ACTB,ANKRD37,CDKN1A,NFKBIA,Tmsb4x (includes others)
TBP		transcription regulator			0.0144	ACTB,CDKN1A,HLA-A,IER3,NFKBIA
genistein		chemical drug		0.735	0.0144	CDKN1A,CLU,CTSH,CTSV,F3,GCLC,HLA-A,IGF1,JUN,JUNB,JUND,Mt1,SPHK1,SPP1,TGFB3,TP53
KDM1A		enzyme		-0.949	0.0145	CDH4,CDKN1A,CLDN7,CXADR,FOXA2,IQGAP2,KRT18,NFE2L3,RHOU,TM4SF1
NCOA1		transcription regulator		-0.478	0.0146	AGRN,ALDOA,Calm1 (includes others),CDKN1A,IGF1,JUNB,Muc1,NFKBIA
NR1H4		ligand-dependent nuclear receptor		0.085	0.0148	AMBP,EDN1,FOXA2,GPX1,GSTA3,LDHA,NFAT5,SPP1,TIMP2
elaidic acid		chemical - endogenous mammalian		-0.816	0.0149	ACSL3,ALDH1A1,CD9,DBI,TTR,YWHAH
sphingosylphosphocholine		chemical - endogenous mammalian			0.0149	DUSP6,JUN
geneticin		chemical toxicant			0.0149	CDKN1A,TP53
Mir218		microRNA			0.0149	SPP1,TOB1
APH1A		peptidase			0.0149	APP,TP53
bendamustine		chemical drug			0.0149	CDKN1A,TP53
RASSF6		other			0.0149	CDKN1A,TP53
AFF4		transcription regulator			0.0149	ANKRD37,Tmsb4x (includes others)
NEK7		kinase			0.0149	EDN1,ISG15
HUWE1		transcription regulator			0.0149	CDKN1A,TP53
SPTAN1		other			0.0149	CDKN1A,ITGA3
TPM3		other			0.0149	IGF1,ITGA3
Ccl6		cytokine			0.0149	CTSV,TIMP4
SHOX		transcription regulator			0.0149	CDKN1A,TP53
ING4	-0.252	transcription regulator			0.0149	CDKN1A,NFKBIA
RPS6KB2		kinase			0.0149	ISG15,TP53
RPL11		other			0.0149	CDKN1A,TP53
YBX3		transcription regulator			0.0149	CLDN2,JUN
SRD5A1		enzyme			0.0149	CLDN2,Mt1
NELFE		other			0.0149	BSG,JUNB
RECK		other			0.0149	CDKN1A,TP53
DEK	0.342	transcription regulator			0.0149	BIRC3,NFKBIA
asbestos		chemical toxicant			0.0149	JUN,JUNB
benazepril		chemical drug			0.0149	CDKN1A,EDN1
acrylamide		chemical toxicant			0.0149	JUN,TP53
racemic flurbiprofen		chemical drug			0.0149	APP,TP53
1,1-bis(3'-indolyl)-1-(4-trifluoromethyl-phenyl)methane		chemical reagent			0.0149	CDKN1A,KRT18
tangeretin		chemical - endogenous non-mammalian			0.0149	CDKN1A,TP53
thymidine		chemical - endogenous mammalian			0.0149	CDKN1A,TP53
aurothioglucose		chemical drug			0.0149	GCLC,SPARC
lead acetate		chemical toxicant			0.0149	GSTM1,GSTM5
TCF3		transcription regulator		0.641	0.0151	CDKN1A,CTSV,EPCAM,Ifi27,JUN,JUND,KLF6,Ly6a (includes others),PFKP,PPIA,PRDX2,SAMD9L,SCX,TAPBPL,TF
Collagen type I (complex)		complex	Inhibited	-2.236	0.0152	APP,ITGA3,S100A10,TIMP2,TP53
F3	-0.509	transmembrane receptor		-1.36	0.0152	DUSP6,EFEMP1,F3,PAK3,SPRY1
TNFSF13B		cytokine		-1.406	0.0152	JUN,NFKB2,RELB,SPP1,TP53
TSC1		other	Activated	2.213	0.0152	CRYAB,NME1,NPM1,RPS6,TP53
SB-431542		chemical reagent		1.89	0.0155	CD14,IGF1,IGFBP7,KRT18,SPP1,TGFB2,TNFRSF12A
DLL4		other		-1	0.0155	LGALS1,NFKB2,NPM1,RELB
EFNA5		kinase		0	0.0155	DUSP6,FOXA2,KRT18,KRT7
CALCA		other		-0.928	0.0156	AHNAK,CYBA,EDN1,IGF1,JUNB,RAP1GAP
GFI1		transcription regulator		1.414	0.0157	CDKN1A,CSF1,JUN,Ly6a (includes others),NFKB2,NFKBIA,RELB,TESC
calcipotriene		chemical drug			0.0158	JUN,JUNB,SPP1
deoxycorticosterone acetate		chemical drug			0.0158	CYBA,EDN1,SPP1
dibutyl phthalate		chemical toxicant			0.0158	JUN,JUNB,SPP1
plumbagin		chemical toxicant			0.0158	BIRC2,BIRC3,TP53
calpain		complex			0.0158	APP,NFKBIA,TP53
UCN-01		chemical drug			0.0158	CDKN1A,RHOB,TP53
tosylphenylalanyl chloromethyl ketone		chemical - protease inhibitor			0.0158	BIRC2,BIRC3,GCLC
ARNT		transcription regulator			0.0161	ALDOA,CD81,CYP2S1,EDN1,LDHA,MYL6,TP53
MSTN		growth factor		-0.255	0.0161	CDKN1A,CTSV,IGF1,IGFBP5,SPP1
THRB		ligand-dependent nuclear receptor		0	0.0164	BIRC3,CTSH,DAD1,FSTL1,GSN,JUN,ME1,NME1,Oasl2,SH2D4A,SPP1,TP53
pirinixic acid		chemical toxicant		-0.748	0.0164	AADAC,BSG,CD63,CDKN1A,CLU,DAD1,DBI,DYNLL1,ENDOG,F3,HLA-E,HSPB1,JUNB,NFKBIA,TP53,TXN,Uox
YBX1		transcription regulator			0.0164	CDKN1A,EFEMP1,F3,S100A13,TP53,USP2
OGT		enzyme		0.203	0.0164	AEBP1,APP,CDKN1A,JUN,KRT18,TP53
SMAD4		transcription regulator		-0.27	0.0165	CDKN1A,CLDN7,CSF1,DAPK1,EDN1,IER3,NFKBIA,PAK3,SPHK1,TGFB2,TIMP3
CLDN7	-0.451	other		-0.478	0.0168	ANXA3,B4GALNT1,F3,IGFBP7,RPS7,TIMP2,TINAGL1
SRC		kinase		-0.663	0.0168	CDKN1A,CTSV,F3,JUN,KRT18,SIRPA,SPP1
26s Proteasome		complex		-1.58	0.0168	BIRC2,BIRC3,CDKN1A,JUNB,MLF1,MYCBP,NFKB2,TP53
SIM1		transcription regulator		-1.897	0.0169	CYBA,FKBP3,GSTA3,HLA-A,NUDC,PDLIM4,SYT7,TSC22D3,USP2,ZFP36L1
GDNF		growth factor			0.0171	ACTB,LGALS1,RPS4Y1,RPSA,SPHK1
Ifnar		group		-1.757	0.0172	APOBEC3B,HLA-A,HLA-E,ISG15,SPP1,TAPBP
JAK2		kinase			0.0175	ACTB,CDKN1A,ENPP2,LY6E,MYL12A,SDC4,TF,TP53
RBPJ		transcription regulator	Activated	2.401	0.0175	CDKN1A,CSF1,IGF1,JUN,NGF,SOX4,TGFB2,TGFB3
K-252		chemical drug			0.0176	CD14,JUN,SPP1
linolenic acid		chemical - endogenous mammalian			0.0176	CLU,EDN1,NFKBIA
LRP6		transmembrane receptor		0.772	0.0179	ALDH1A1,APP,EPCAM,KRT18
IFNA4		cytokine		-0.924	0.0179	HLA-E,ISG15,Ly6a (includes others),SLCO3A1
RUNX1-RUNX1T1		fusion gene/product			0.018	CA8,CDKN1A,CYP2S1,DUSP6,SOX4,TP53
ASPSCR1-TFE3		fusion gene/product	Inhibited	-2.449	0.018	CRYAB,CTTN,HLA-E,MYOF,RAB32,VAT1
NFATC3		transcription regulator		-1.131	0.0181	EDN1,F3,FOXA2,JUN,SFTPD
ID1		transcription regulator		-1.409	0.0181	ALDH1A1,CDKN1A,FOXA2,Ly6a (includes others),TF
RNASEH2B		enzyme			0.0184	CDKN1A,ISG15
CAMK2N2		other			0.0184	CDKN1A,TP53
PARP		group			0.0184	CDKN1A,TP53
PARP14		enzyme			0.0184	F3,ISG15
ABCA7		transporter			0.0184	APP,CD14
TAF5		transcription regulator			0.0184	ACTB,IGF1
PPM1D		phosphatase			0.0184	CDKN1A,TP53
ANG		enzyme			0.0184	CDKN1A,TP53
DAB2IP		other			0.0184	CDKN1A,CLU
MLH1		enzyme			0.0184	CLU,TP53
USP19		peptidase			0.0184	BIRC2,BIRC3
ANGPTL3		growth factor			0.0184	AGRN,HSPG2
FOXJ1	1.844	transcription regulator			0.0184	FOXJ1,SPAG6
alpha-santalol		chemical reagent			0.0184	CDKN1A,TP53
HDAC8		transcription regulator			0.0184	CDKN1A,TP53
farglitazar		chemical drug			0.0184	ATP1A1,EDN1
quinidine		chemical drug			0.0184	CDKN1A,TP53
acetic acid		chemical - endogenous mammalian			0.0184	JUN,JUNB
tiron		chemical reagent			0.0184	CDKN1A,PRDX2
pepstatin		chemical - protease inhibitor			0.0184	CD151,CD9
perilla alcohol		chemical drug			0.0184	CDKN1A,NFKBIA
ESRRA		ligand-dependent nuclear receptor		-1.132	0.0185	CSRP2,CYB5A,ENDOG,KRT19,KRT23,LDHA,PKM,SPP1,TGFB3
phosphate		chemical - endogenous mammalian		0.946	0.0188	AMBP,DUSP6,LDHA,NPM1,RHOC,SPP1
corticosterone		chemical - endogenous mammalian		-0.222	0.0189	APP,ATP1A1,CDKN1A,CYBA,EDN1,JUN,TSC22D3
celecoxib		chemical drug		-1.035	0.0189	APP,BIRC2,CDKN1A,CLDN4,F3,ST3GAL4,TP53
tanespimycin		chemical drug		0.096	0.0189	BIRC3,CDKN1A,CHUK,JUN,KRT18,LDHA,RPL27A
linoleic acid		chemical - endogenous mammalian		1.387	0.0191	APP,CD47,CLU,EDN1,NFKBIA
GNA14		enzyme			0.0191	ANKRD1,ANXA3,KLF6,SPHK1,ZFP36L1
RXRB		ligand-dependent nuclear receptor			0.0191	ALDH1A1,CRYAB,FSTL1,IGF1,SPP1
ZFPM1		transcription regulator			0.0191	ANXA5,CD63,CNN3,KLF6,SH2D4A
silibinin		chemical drug		0.781	0.0191	CDKN1A,KRT18,NFKBIA,TIMP2,TP53
PTGS2		enzyme		-0.99	0.0191	BIRC3,CDKN1A,CLU,DYNLL1,IGF1,KRT23,Pde4d,TNFRSF12A,TP53
PROC		peptidase		0.919	0.0192	BIRC2,CLU,NFKB2,TP53
UTP		chemical - endogenous mammalian			0.0195	CD14,F3,SPP1
selumetinib		chemical drug			0.0195	CDKN1A,JUN,JUNB
CTSB		peptidase			0.0195	APP,CTSV,SPHK1
SLC9A3		ion channel			0.0195	Mt1,Mt2,SLC5A1
CCR1		G-protein coupled receptor			0.0195	CTSV,SPARC,SPP1
ozone		chemical toxicant			0.0195	JUN,JUNB,SPP1
diallyl disulfide		chemical - endogenous non-mammalian			0.0195	GSTA3,GSTM5,TP53
octreotide		biologic drug			0.0195	CDKN1A,IGF1,TP53
progestin		chemical drug			0.0195	NFKBIA,SYNE1,TIMP2
HMOX1		enzyme		0.816	0.0196	CD14,CDKN1A,GCLC,IGF1,SPARC,TGFB2,TP53
alitretinoin		chemical drug		0.067	0.0201	ANXA5,APP,Casp12,CD14,CDKN1A,CPM,ISG15,SPP1
mir-34		microRNA		1.945	0.0201	BIRC3,CD47,DNAH6,TP53,TUBB4B
AGER		transmembrane receptor		0.132	0.0201	APP,CDKN1A,CSF1,F3,TP53
tyrphostin AG 1478		chemical - kinase inhibitor		0.33	0.0201	CDKN1A,EDN1,F3,S100A10,SPHK1
PAF1		other		-1	0.0206	BAMBI,BIRC3,ISG15,SDC4
ITGA5		transmembrane receptor			0.0206	CDKN1A,ENPP2,JUN,JUNB
TXN	0.493	enzyme			0.0206	CDKN1A,NFKBIA,TP53,TXN
topotecan		chemical drug		-0.513	0.021	ARPC1B,CDKN1A,CHD3,CYB5A,GPX1,HLA-E,JUNB,SOX4,TP53
mir-21		microRNA	Activated	3.09	0.021	Casp12,CDKN1A,CLU,CRY2,DDAH2,NME1,PSME2,RHOB,SPRY1,STMN1,TIMP3,TP53
TLR4		transmembrane receptor	Inhibited	-3.118	0.0212	APOBEC3B,APP,BAMBI,BCL10,CD14,EDN1,F3,ISG15,NFKB2,NFKBIA,PTGFR,RELB,SLCO3A1,SPHK1,SPP1
CISH		other	Activated	2.236	0.0212	CD14,CSF1,EDN1,SPHK1,SPP1
beta-escin		chemical drug			0.0214	CDKN1A
CRB2		other			0.0214	APP
tris(2,3-dibromopropyl)phosphate		chemical toxicant			0.0214	TP53
dichlorvos		chemical toxicant			0.0214	PPIA
JIP1/2/3		group			0.0214	APP
Type I BMP receptor		group			0.0214	NGF
bapineuzumab		biologic drug			0.0214	APP
DNAJ		group			0.0214	ENPP2
SERPINF		group			0.0214	NGF
G-Actin		group			0.0214	JUN
HCG11		other			0.0214	CDKN1A
Gm26504		other			0.0214	IGF1
LINC00475		other			0.0214	CDKN1A
ANO1		ion channel			0.0214	CYBA
THG1L		enzyme			0.0214	TP53
ECE2		peptidase			0.0214	APP
DDX53		other			0.0214	TP53
ENTPD7		enzyme			0.0214	APP
aleplasinin		chemical drug			0.0214	APP
CD3-TCR		complex			0.0214	TOB1
ARMC10		other			0.0214	CDKN1A
SNORD21		other			0.0214	HLA-A
FKBPL		other			0.0214	CDKN1A
ZBTB7C		transcription regulator			0.0214	CDKN1A
RND2		enzyme			0.0214	RHOB
EEF1E1		translation regulator			0.0214	TP53
EBF4		transcription regulator			0.0214	CDKN1A
MACROD1	0.285	enzyme			0.0214	NFKBIA
CALHM1		ion channel			0.0214	APP
ABCA2		transporter			0.0214	APP
CXXC1		transcription regulator			0.0214	CDKN1A
CCDC22		other			0.0214	BIRC3
DDIAS		other			0.0214	TP53
CYTL1		cytokine			0.0214	IGF1
GSAP		peptidase			0.0214	APP
ECE		group			0.0214	APP
TRIM39		other			0.0214	TP53
ZBTB8A		other			0.0214	CDKN1A
REV3L		enzyme			0.0214	TP53
ZDHHC21		enzyme			0.0214	APP
HSPA6		enzyme			0.0214	SPHK1
TPH2		enzyme			0.0214	IGF1
CLK1		kinase			0.0214	F3
KCTD10		ion channel			0.0214	RHOB
acetylcholinesterase inhibitor		chemical drug			0.0214	APP
PFKP	-0.323	kinase			0.0214	F3
HM13		peptidase			0.0214	APP
PCLAF		other			0.0214	CDKN1A
RNF181		enzyme			0.0214	BCL10
LRRC4		other			0.0214	STMN1
FANK1		transcription regulator			0.0214	JUN
ATP13A2		transporter			0.0214	CTTN
FBXL2		enzyme			0.0214	APP
CHF 5074		chemical drug			0.0214	APP
Magea3 (includes others)		other			0.0214	TP53
7-bromoindirubin-3'-oxime		chemical - kinase inhibitor			0.0214	CDKN1A
inolitazone		chemical drug			0.0214	CDKN1A
lymphokine		group			0.0214	F3
Lectin		group			0.0214	F3
Rho gdi		group			0.0214	RHOB
STMN2		other			0.0214	APP
AZD1480		chemical drug			0.0214	TF
NECTIN3		other			0.0214	Pvr
dixanthogen		chemical toxicant			0.0214	GSTM5
SGTA		other			0.0214	IGF1
KLC1		other			0.0214	APP
RAD23A		other			0.0214	TP53
CABLES1		other			0.0214	CDKN1A
CDT1		other			0.0214	CDKN1A
RPL23		other			0.0214	TP53
RPL24		other			0.0214	TP53
ACVR2B		kinase			0.0214	CDKN1A
LINC00672		other			0.0214	LASP1
CLK4		kinase			0.0214	F3
FBXL20		other			0.0214	APP
SYNJ1		phosphatase			0.0214	APP
miR-523-3p (miRNAs w/seed AACGCGC)		mature microRNA			0.0214	CDKN1A
mir-1301		microRNA			0.0214	KLF6
miR-1204 (miRNAs w/seed CGUGGCC)		mature microRNA			0.0214	TP53
RTN1		other			0.0214	APP
ARF3		enzyme			0.0214	APP
EIF2B2		other			0.0214	ACTB
(3E)-1-[(1S)-1-(4-fluorophenyl)ethyl]-3-[[3-methoxy-4-(4-methylimidazol-1-yl)phenyl]methylidene]piperidin-2-one		chemical reagent			0.0214	APP
ZBTB5		transcription regulator			0.0214	CDKN1A
TOM1L1		other			0.0214	TP53
DHX8		enzyme			0.0214	CDKN1A
BORCS8-MEF2B		transcription regulator			0.0214	JUN
LY2811376		chemical drug			0.0214	APP
CAMK2		group			0.0214	BIRC3
EPSTI1		other			0.0214	NFKBIA
SPRR2B		other			0.0214	TP53
APBA2		transporter			0.0214	APP
PTS		enzyme			0.0214	IGF1
RNF7		enzyme			0.0214	JUN
DNASE1L3		enzyme			0.0214	CDKN1A
NXF3		transporter			0.0214	TGFB3
TUBB3		other			0.0214	ANXA5
CCNI	-0.313	other			0.0214	CDKN1A
CLN5		other			0.0214	APP
BACE2		peptidase			0.0214	APP
N6-methyl-(R)-roscovitine		chemical reagent			0.0214	APP
FXYD1		ion channel			0.0214	CDKN1A
QPCT	-0.295	enzyme			0.0214	APP
NINJ1	-0.28	other			0.0214	TP53
BRAT1		other			0.0214	TP53
TRNAU1AP		other			0.0214	GPX1
ING3		other			0.0214	CDKN1A
holothurian glycosaminoglycan		chemical - endogenous non-mammalian			0.0214	F3
NOCT		transcription regulator			0.0214	IGF1
WT1-AS		other			0.0214	TP53
NECAB3		other			0.0214	APP
JADE1		transcription regulator			0.0214	CDKN1A
ARCN1		other			0.0214	APP
WEE1		kinase			0.0214	TP53
ITM2C		other			0.0214	APP
BTA-EG4		chemical reagent			0.0214	APP
DAPK2		kinase			0.0214	TP53
UBE2E1		enzyme			0.0214	CDKN1A
ginsenoside Rg3		biologic drug			0.0214	APP
CUL9		other			0.0214	CDKN1A
INHBE		growth factor			0.0214	JUNB
PAK3	-0.284	kinase			0.0214	APP
RPS27		other			0.0214	TP53
Zfp871		other			0.0214	TP53
RPS27L	0.33	translation regulator			0.0214	TP53
SCML2		transcription regulator			0.0214	CDKN1A
IFITM3	0.378	other			0.0214	SPP1
DNAH5	0.561	enzyme			0.0214	DNAH6
SPRR3		other			0.0214	TP53
SPAG6	0.887	other			0.0214	SPAG16
TDP-665759		chemical reagent			0.0214	CDKN1A
SHC3		kinase			0.0214	APP
CNTNAP1		other			0.0214	APP
GTSE1		other			0.0214	TP53
SR11256		chemical reagent			0.0214	EDN1
TOM1		transporter			0.0214	APP
RPL7A		other			0.0214	TP53
JV-1-63 hGHRH(1-29)NH2		chemical reagent			0.0214	TP53
BC-DXI01		chemical reagent			0.0214	AIMP2
KH-CB19		chemical - kinase inhibitor			0.0214	F3
sphingosine kinase inhibitor V		chemical - kinase inhibitor			0.0214	APP
soluble gamma-secretase modulator 49		chemical reagent			0.0214	APP
soluble gamma-secretase modulator 41		chemical reagent			0.0214	APP
soluble gamma-secretase modulator 46		chemical reagent			0.0214	APP
5-fluorouracil/thymidine		chemical drug			0.0214	TP53
E. coli 0111:B4 peptidoglycan		chemical - endogenous non-mammalian			0.0214	DBI
2-ethylestrone-3-O-sulfamate		chemical reagent			0.0214	TP53
EG443		chemical reagent			0.0214	APP
MC622		chemical reagent			0.0214	APP
MC55w21		chemical reagent			0.0214	APP
MC55w10		chemical reagent			0.0214	APP
CRANAD-17		chemical reagent			0.0214	APP
anti-miR-29a inhibitor		chemical reagent			0.0214	TIMP3
KRT7-AS		other			0.0214	KRT7
nitroaspirin		chemical drug			0.0214	F3
MW-III-36C		chemical - protease inhibitor			0.0214	APP
meclofenamic acid		chemical drug			0.0214	APP
4-hydroxybutanoic acid		chemical drug			0.0214	APP
2,5-dihydroxymethylcinnamate		chemical - kinase inhibitor			0.0214	EDN1
diflunisal		chemical drug			0.0214	APP
BW-755C		chemical drug			0.0214	JUND
diisopropanolnitrosamine		chemical toxicant			0.0214	CDKN1A
2-aminofluorene		chemical toxicant			0.0214	TP53
bathophenanthroline		chemical reagent			0.0214	CP
ABT 702		chemical drug			0.0214	TP53
RS86		chemical reagent			0.0214	APP
pinacidil		chemical drug			0.0214	APP
AN-238		chemical toxicant			0.0214	TP53
NSC 126405		chemical reagent			0.0214	CDKN1A
donepezil		chemical drug			0.0214	APP
synthetic peptide		chemical reagent			0.0214	SPARC
lasofoxifene		chemical drug			0.0214	TP53
hydroxyacetylaminofluorene		chemical toxicant			0.0214	TP53
fluoranthene		chemical toxicant			0.0214	TP53
IC261		chemical - kinase inhibitor			0.0214	APP
adozelesin		chemical drug			0.0214	TP53
PK 11195		chemical drug			0.0214	APP
tolcapone		chemical drug			0.0214	COMT
2-nitrophenyl EGTA		chemical reagent			0.0214	AHNAK
SKI-190986		chemical reagent			0.0214	APP
SKI-213271		chemical reagent			0.0214	APP
2-((4-(2-hydroxypropan2-yl)phenyl)amino)-1H-benzo[d]imidazole-6-carbonitrile		chemical - kinase inhibitor			0.0214	APP
CS-1		chemical reagent			0.0214	APP
ZBTB16-RARA		fusion gene/product			0.0214	DUSP6
tilimycin		chemical - endogenous non-mammalian			0.0214	TP53
TFMB-(R)-2-HG		chemical reagent			0.0214	TP53
iso-alpha acid		chemical reagent			0.0214	APP
ATSP-7041		chemical reagent			0.0214	TP53
NCB-0846		chemical - kinase inhibitor			0.0214	JUN
NRP2-PLXNA1		complex			0.0214	TP53
2-methoxy-5-(2',3',4'-trimethoxyphenyl)-2,4,6-cycloheptatrien-1-one		chemical reagent			0.0214	JUN
metal ion		chemical - other			0.0214	TP53
NADP		chemical - endogenous mammalian			0.0214	F3
2',5'-dideoxyadenosine		chemical reagent			0.0214	IGF1
idebenone		chemical drug			0.0214	NGF
cycloleucine		chemical toxicant			0.0214	PHB
glycan		chemical - other			0.0214	F3
gestodene		chemical drug			0.0214	TGFB3
geldanamycin		chemical - endogenous non-mammalian		1.474	0.0215	BSG,CHUK,CLU,EEF1A1,JUN,NPM1,NUDC,PTGES3,RALA,SLC5A1,TP53,YWHAQ
CLDN6	-0.645	other			0.0215	CLDN10,CLDN4,CLDN7
mir-31		microRNA			0.0215	BAMBI,SPP1,STMN1
titanium dioxide		chemical drug			0.0215	CDKN1A,CRYAB,IGF1
arsenic		chemical toxicant			0.0215	BIRC3,GCLC,Mt1
DNMT1		enzyme			0.0215	ACTB,CDKN1A,Mt1,MYL6,RPL10A,TIMP3
tamoxifen		chemical drug		-1.655	0.0216	AHNAK,AMBP,CDKN1A,CLU,IER3,IGF1,JUN,JUNB,PKM,SPP1,SYNE1,TP53,TXN
L-triiodothyronine		chemical - endogenous mammalian		0.789	0.0218	ACTB,ALDH1A1,APP,ATP1A1,CDKN1A,CEP126,CLU,CTSH,EDN1,ENPP2,IGF1,ME1,NME1,PRDX2,ST3GAL4,TF,TP53
LDB1		transcription regulator		-0.577	0.022	ACTB,CDKN1A,CLDN2,CLDN4,COMT,GSN,LGALS1,MFGE8,MYH10,Oasl2,RAB32,TGFB2
Hedgehog		group			0.022	FOXA2,KRT19,SPP1,TP53
KAT2B		transcription regulator		-0.647	0.022	CDKN1A,ISG15,PKHD1,TP53
L-serine		chemical - endogenous mammalian			0.0221	CDKN1A,TP53
EPHB1		kinase			0.0221	JUN,JUNB
CTSV	-0.506	peptidase			0.0221	CD2AP,CTSV
coal tar		chemical drug			0.0221	GCLC,GPX1
MSI2		other			0.0221	CDKN1A,CLDN7
PIP5K1A		kinase			0.0221	NME1,TP53
TRIM25		transcription regulator			0.0221	CDKN1A,TP53
PBRM1		other			0.0221	CDKN1A,S100A13
HIPK1	0.947	kinase			0.0221	GCLC,GSTM5
miR-208a-3p (and other miRNAs w/seed UAAGACG)		mature microRNA			0.0221	CD14,SPP1
TWIST		group			0.0221	B4GALNT1,CDKN1A
DRD1		G-protein coupled receptor			0.0221	JUNB,S100A10
LINC-ROR		other			0.0221	CDKN1A,TP53
FANCD2		other			0.0221	CDKN1A,GPX1
ARF6		transporter			0.0221	ISG15,RHOB
AFP		transporter			0.0221	PTP4A1,TNFRSF12A
CHRNA3		transmembrane receptor			0.0221	CDKN1A,TP53
meloxicam		chemical drug			0.0221	CDKN1A,Pde4d
enterolactone		chemical - endogenous mammalian			0.0221	SPARC,SPP1
CA074-methyl ester		chemical reagent			0.0221	APP,SPHK1
tyrphostin AG 1296		chemical - kinase inhibitor			0.0221	CD14,JUN
adaphostin		chemical drug			0.0221	CDKN1A,TP53
mimosine		chemical drug			0.0221	CDKN1A,TP53
miR-199a-5p (and other miRNAs w/seed CCAGUGU)		mature microRNA		1.342	0.0224	BCAM,CDKN1A,ISG15,ITGA3,SAMD9L
NTRK2		kinase			0.0224	APP,CDKN1A,DAPK1,Muc1,SPP1
TFAP2C		transcription regulator		-1.446	0.0224	CDKN1A,GPX1,GSTA3,IGFBP5,SFTPD
LMO2		transcription regulator		-0.577	0.0225	ACTB,CDKN1A,CLDN2,CLDN4,COMT,GSN,LGALS1,MFGE8,MYH10,Oasl2,RAB32,TGFB2
PPARA		ligand-dependent nuclear receptor		0.095	0.0226	AADAC,APP,CD63,CDKN1A,CYBA,DBI,DYNLL1,EDN1,ENDOG,Gstt1,HLA-E,IGFBP5,KRT23,NFKBIA,PAH,STBD1,TXN
F2R		G-protein coupled receptor		-1.698	0.0234	BIRC2,F3,IGFBP7,KRT19,TGFB2,TP53
CREBBP		transcription regulator		-0.6	0.0235	CAPG,CDKN1A,CNN3,CSF1,DNAJB4,ISG15,JUN,JUND,MYCBP,NFKBIA,PDLIM4,PKHD1,SDC4,TAPBP,TESC
TNFAIP3		enzyme		0	0.0235	BIRC3,CHUK,CSF1,NFKBIA
H2AB3 (includes others)		other		-1	0.0235	CDKN1A,DCLK1,PDZK1IP1,SERPINB9
HSPA5		enzyme		-1	0.0235	APP,CD47,CLU,ISG15
9,10-dimethyl-1,2-benzanthracene		chemical toxicant			0.0235	CDKN1A,GCLC,JUN,TP53
dasatinib		chemical drug			0.0236	ANKRD1,RPS6,TP53
crizotinib		chemical drug			0.0236	PTP4A1,SPARC,TGFB3
ROCK1		kinase			0.0236	APP,EDN1,TGFB2
HOXB13		transcription regulator			0.0236	CDKN1A,NFKBIA,UGT2B7
B2M	-0.298	transmembrane receptor			0.0236	HLA-A,HLA-E,TAPBP
PD 123319		chemical drug			0.0236	CYBA,SPP1,SPRY1
stearic acid		chemical - endogenous mammalian			0.0236	CLU,EDN1,NFKBIA
NR1H3		ligand-dependent nuclear receptor		1.134	0.0236	ACSL3,CD47,CDKN1A,CXCL16,GPX1,GSTM5,MFGE8,Mt1,Mt2,NFKBIA
STAT4		transcription regulator	Inhibited	-2.578	0.0236	AHNAK,BSG,DDAH2,ERRFI1,IER3,ISG15,KRT18,Mt1,TGFB3,TUBB2B
FGFR2		kinase	Activated	2.423	0.0237	CDKN1A,CLIC6,CTSH,FOXA2,IGF1,SPP1,TTR
bexarotene		chemical drug		-0.707	0.0243	APP,ARL6IP5,CLIC6,CTSH,GPM6B,SPARC,TGFB2,TM4SF1,TSC22D3
cocaine		chemical drug		-0.342	0.0243	DYNLL1,FRMD6,JUN,JUNB,MNS1,NFKB2,PDXK,PRDX2,TUBB
UCHL1		peptidase		1.325	0.0247	CDKN1A,RPL7,RPS6,SH2D4A,TP53
MAP2K6		kinase		-1.257	0.0247	CDKN1A,CRYAB,ISG15,JUN,RELB
IDH1		enzyme			0.025	CD47,CLDN7,TGFB2,TP53
IRF6		transcription regulator		0.152	0.025	APOBEC3B,CD14,CD9,ENPP2
nitroprusside		chemical drug		-0.218	0.025	DUSP6,IGF1,MYH14,TP53
NR1I2		ligand-dependent nuclear receptor		0.761	0.0252	ALDH1A1,CDKN1A,GSTM1,GSTM5,IGF1,JUN,TF,Uox
RAS		group		-1.604	0.0255	CDKN1A,CLDN4,EDN1,IGF1,JUN,NPM1,TP53
CTCF		transcription regulator		0.08	0.0255	APP,CD14,CDKN1A,NFKB2,TGFB3,TNFRSF12A,TP53
ARRB1		other			0.0258	F3,JUNB,SPP1
NCOA4		transcription regulator			0.0258	CLDN7,EHF,ST3GAL6
acteoside		chemical - endogenous non-mammalian			0.0258	APP,GCLC,TP53
ferulic acid		chemical - endogenous non-mammalian			0.0258	APP,CDKN1A,GPX1
PRKCE		kinase	Inhibited	-2.135	0.026	APP,BIRC3,CDKN1A,JUN,JUNB
1-methyl-4-phenyl-1,2,3,6-tetrahydropyridine		chemical toxicant			0.026	APP,HSPB1,JUN,NGF,TP53
HCAR1		G-protein coupled receptor			0.0262	BSG,EDN1
AFAP1-AS1		other			0.0262	LASP1,RHOC
FLZ		chemical drug			0.0262	APP,TP53
NELFB		other			0.0262	CDKN1A,RPLP0
CST3		other			0.0262	APP,NFKBIA
CLCA2		ion channel			0.0262	CDKN1A,TP53
NUMBL		other			0.0262	CDKN1A,SPARC
FOXD3		transcription regulator			0.0262	CDKN1A,FOXA2
PAWR		transcription regulator			0.0262	APP,CDKN1A
GATA5		transcription regulator			0.0262	EDN1,SLC5A1
RASGRF1		other			0.0262	IGF1,RRAS
CDH5		other			0.0262	CDKN1A,TP53
KRIT1		other			0.0262	JUN,TGFB2
ACO1		enzyme			0.0262	APP,IGF1
1,10-phenanthroline		chemical toxicant			0.0262	CDKN1A,TP53
sanglifehrin A		chemical reagent			0.0262	CDKN1A,TP53
trientine		chemical drug			0.0262	IGF1,IGFBP5
zinostatin		biologic drug			0.0262	CDKN1A,TP53
cucurbitacin B		chemical - endogenous non-mammalian			0.0262	CDKN1A,TP53
TCF7L2		transcription regulator		0.017	0.0263	ACSL3,CDKN1A,CLDN2,CREB5,CSRP1,ENPP2,EPCAM,GSN,HSPA2,MAN1A1,ME1,NUDT4,SPP1
THRA	-0.254	ligand-dependent nuclear receptor		-1.111	0.0264	APP,CDKN1A,CTSH,IGF1,JUN,NME1,TP53
Rock		group			0.0266	APP,CDKN1A,F3,SPP1
GHR		transmembrane receptor			0.0266	CDKN1A,IGF1,SPP1,TP53
BAX	0.336	transporter			0.0266	BIRC2,CDKN1A,CTSH,HLA-A
arsenic trioxide		chemical drug		-1.141	0.0269	CDKN1A,COX7A2L,ERP29,GCLC,HSPA2,KCNQ1OT1,ME1,NFKBIA,NPM1,SRSF10,TMOD1,TP53,UQCR10
TLR3		transmembrane receptor	Inhibited	-2.371	0.0269	CLU,CPM,EDN1,IER3,ISG15,JUNB,NFE2L3,Oasl2,RHOB,SERPINB9,SPRY1
GATA6		transcription regulator		0.266	0.0273	BCAM,CALML4,CDKN1A,EDN1,FOXA2,KRT7,SEMA3C,SPARC,TGFB2
budesonide		chemical drug		0.555	0.0273	CDKN1A,JUN,RAP1GAP,RHOC,TSC22D3
NFKB2	-0.315	transcription regulator		-0.762	0.0273	ANXA5,BIRC3,CDKN1A,MARCKSL1,NFKB2
ascorbic acid		chemical - endogenous mammalian		-0.468	0.0273	CDKN1A,IGF1,IGFBP5,SPARC,SPP1
WBP2		transcription regulator	Inhibited	-2.63	0.0273	C9orf116,DCLK1,ENDOG,JUN,OSCP1,SOX4,SPRY1
phenethyl isothiocyanate		chemical drug			0.0276	CTTN,GSTA3,Pvr,RPL3,RPL5,TXN
EP300		transcription regulator		-1.402	0.028	CAPG,CDKN1A,CNN3,COMT,DNAJB4,EDN1,IGF1,JUN,LDHA,NFKBIA,PDLIM4,SDC4,SPHK1,TESC,TGFB2,TP53
ID3		transcription regulator		-0.896	0.028	CDKN1A,CSF1,KLF6,LGALS1,NFAT5,RAP1GAP,RELB,SOX4,TP53
caspase		group			0.0281	APP,CD14,CDKN1A
ADAMTS18		peptidase			0.0281	CLDN4,ITGA3,TGFB3
NR2E1		ligand-dependent nuclear receptor			0.0281	CDKN1A,MAK,TGFB2
SRSF1		other			0.0281	KLF6,Tmsb4x (includes others),TP53
PTX3		other			0.0281	F3,IGF1,JUN
DRD2		G-protein coupled receptor			0.0281	CRYAB,IGF1,JUN
vinblastine		chemical drug			0.0281	CDKN1A,HLA-A,TP53
bufalin		chemical reagent			0.0281	RPLP0,YWHAH,YWHAQ
platelet activating factor		chemical - endogenous mammalian		-0.152	0.0283	CDKN1A,F3,NFKBIA,TIMP2
AKT2		kinase			0.0283	CDKN1A,GCLC,NFKB2,SPRY1
NKX3-1		transcription regulator			0.0283	CA8,CTSV,SDC4,SOX4
NFKBIB		transcription regulator			0.0283	Casp12,CTSV,DAPK1,NFKBIA
MMP1		peptidase		-0.927	0.0283	CDKN1A,IGF1,JUN,NFKBIA
SAFB	0.28	other		0	0.0283	CHD3,HLA-E,IGF1,JUN
carbonyl cyanide m-chlorophenyl hydrazone		chemical toxicant		-1.067	0.0283	AADAC,CTSV,ERRFI1,ZFP36L1
DETA-NONOate		chemical reagent		0.293	0.0283	BIRC2,BIRC3,CDKN1A,TP53
iron		chemical - endogenous mammalian		-1.131	0.0283	APP,CDKN1A,Mt1,TF
ZEB1		transcription regulator		1.432	0.0286	ALDH1A1,CXADR,KRT18,KRT19,TF
IFN alpha/beta		group		-0.351	0.03	CXCL16,HLA-A,Ly6a (includes others),LY6E,SERPINB9
sodium chloride		chemical - endogenous mammalian	Inhibited	-2.202	0.03	CYBA,EDN1,GPX1,NFAT5,SPP1
CDK9		kinase			0.03	ANKRD37,CDKN1A,NFKBIA,Tmsb4x (includes others)
pyridaben		chemical toxicant		-1	0.03	C9orf116,CEP290,MAPK15,NFAT5
anisomycin		chemical - endogenous non-mammalian		-0.157	0.03	CDKN1A,JUN,JUNB,SPP1
LDL		complex		-0.399	0.0303	APOBEC3B,CDKN1A,F3,GCLC,GPX1,IGF1,JUN,LASP1,NME1,SPHK1,TP53
S100A9		other		-1.414	0.0304	ALDH1A1,CP,CPM,ENPP2,EPCAM,IGF1,ISG15,TRAF3IP1
desoxycorticosterone		chemical - endogenous mammalian			0.0305	CYBA,SPP1
trypsin		group			0.0305	CDKN1A,F3
POLR3G		enzyme			0.0305	KLF6,TP53
SAMHD1		enzyme			0.0305	NFKB2,NFKBIA
SOX5		transcription regulator			0.0305	HSPG2,SPAG6
PPP3CB		phosphatase			0.0305	CDKN1A,TP53
CSF2RA		transmembrane receptor			0.0305	JUN,JUNB
BCAR1		enzyme			0.0305	CDKN1A,RALA
XRCC5		enzyme			0.0305	Mt1,TP53
RPS6KA4		kinase			0.0305	JUN,JUNB
TRRAP		transcription regulator			0.0305	CDKN1A,TP53
AK1		kinase			0.0305	LDHA,PKM
FGF18		growth factor			0.0305	BAMBI,CSF1
ATXN3		peptidase			0.0305	APP,ISG15
SERPINB5		other			0.0305	CDKN1A,KRT18
KRT8	-0.285	other			0.0305	KRT18,KRT19
PPP5C		phosphatase			0.0305	CDKN1A,TP53
PPIA	-0.278	enzyme			0.0305	BSG,PPIA
HPSE		enzyme			0.0305	APP,F3
6-aminopyrazolopyrimidine derivative compound II		chemical - kinase inhibitor			0.0305	ISG15,Oasl2
cytochalasin B		chemical toxicant			0.0305	CD63,CDKN1A
hydroquinone		chemical - endogenous mammalian			0.0305	GCLC,JUN
Complement		complex			0.0305	CLU,F3
spermine nitric oxide complex		chemical toxicant			0.0305	MYH14,S100A10
KT5823		chemical - kinase inhibitor			0.0305	EDN1,S100A10
gambogic acid		chemical - endogenous non-mammalian			0.0305	BIRC2,BIRC3
collagenase		group			0.0306	IER3,JUN,JUNB
ELF3	-0.307	transcription regulator			0.0306	CLDN7,EHF,TIMP3
RNASEL		enzyme			0.0306	CDKN1A,CYB5A,ISG15
ROR1		kinase			0.0306	FSTL1,KRT19,STMN1
mir-193		microRNA			0.0306	CD151,CD2AP,STMN1
PRLR		transmembrane receptor			0.0306	CDKN1A,IGFBP5,TP53
NRXN1		transporter			0.0306	CD47,CLDN6,FLRT2
betulinic acid		chemical drug			0.0306	CYBA,PKM,TIMP2
NR5A2		ligand-dependent nuclear receptor		-0.161	0.031	CDKN1A,CXCL16,FOXA2,JUN,JUNB,Mt1
CDKN1A	1.558	kinase		0.016	0.0317	ACTB,APP,BIRC2,CDKN1A,CRYAB,GSTO1,KRT18,NFKBIA,NPM1,STMN1,TP53
quercetin		chemical drug		0.114	0.0324	Casp12,CD63,COMT,EDN1,JUN,PRDX5,TP53
TO-901317		chemical reagent	Activated	2.574	0.033	APP,Casp12,COMT,GSTM5,IGF1,Mt1,Mt2,NFKBIA,PFKP,TIMP3
ELAVL1		other		-1.188	0.033	ANXA11,CDKN1A,HLA-A,HSPA2,Ifi27,NFKBIA,RPS6,TP53,TSC22D3
MMP14		peptidase			0.0331	BCAM,CDKN1A,DAPK1
ZBTB7A		transcription regulator			0.0331	CDKN1A,PFKP,PKM
RXRG		ligand-dependent nuclear receptor			0.0331	CRYAB,TIMP2,TIMP3
VTN		other			0.0331	CDKN1A,F3,S100A10
AHCY		enzyme			0.0331	FOXA2,GPX1,KRT18
eplerenone		chemical drug			0.0331	CYBA,EDN1,SPP1
CLUH		translation regulator		1.225	0.0336	AIMP2,HLA-A,ISG15,MRPL13
SERPINF1		other			0.0336	CRYAB,CYBA,NFKBIA,NGF
vorinostat		chemical drug		0.48	0.034	BIRC2,BIRC3,CDKN1A,CLDN2,CLU,EDN1,JUN,MFGE8,NFKBIA,TP53,TXN
FBXO32	0.348	enzyme		-0.447	0.0343	CSRP2,FOXA2,GCLC,ITGA3,KRT19
ZBTB16		transcription regulator		0.053	0.0345	CD14,CD81,CDKN1A,Ly6a (includes others),SPP1,TMEM176B,TSC22D3
HDAC2		transcription regulator		-1.121	0.0345	CDKN1A,F3,IGF1,Mt2,NFKBIA,RHOB,TP53
PI3K (family)		group		-0.728	0.0348	BIRC3,CLDN2,GCLC,ISG15,PKM,SOX4
sorbitol		chemical - endogenous mammalian			0.0351	CDKN1A,ERRFI1
glycochenodeoxycholate		chemical - endogenous mammalian			0.0351	BIRC2,BIRC3
Ginkgo biloba		chemical drug			0.0351	JUN,TP53
MEG3		other			0.0351	JUN,TP53
(+)-catechin		chemical drug			0.0351	JUN,TP53
Hnf3		group			0.0351	AMBP,TTR
Ptprd		phosphatase			0.0351	CDKN1A,IGFBP5
FH		enzyme			0.0351	CDKN1A,LDHA
DANCR		other			0.0351	TIMP2,TIMP3
Collagen Alpha1		group			0.0351	CDKN1A,TIMP2
IDH2		enzyme			0.0351	CLDN7,TGFB2
PSMB10	-0.373	peptidase			0.0351	NFKB2,NFKBIA
COL9A1		other			0.0351	HSPG2,MFGE8
SRSF3		other			0.0351	JUN,TP53
HOXA4		transcription regulator			0.0351	ANKRD1,TGFB2
RALA	-0.309	enzyme			0.0351	CDKN1A,TP53
dimethyl fumarate		chemical drug			0.0351	F3,JUN
selenite		chemical toxicant			0.0351	HLA-E,Mt1
pyruvic acid		chemical - endogenous mammalian			0.0351	ALDOA,TP53
N1,N11-diethylnorspermine		chemical drug			0.0351	CDKN1A,TP53
spermidine		chemical - endogenous mammalian			0.0351	CDKN1A,KRT19
noscapine		chemical drug			0.0351	BIRC2,BIRC3
pyrimidin-2-one beta-ribofuranoside		chemical reagent			0.0351	CDKN1A,TP53
E64d		chemical - protease inhibitor			0.0351	APP,TP53
BMP7		growth factor		-1.474	0.0352	CDKN1A,EDN1,EPCAM,F3,IGF1,IGFBP5,SPP1,TGFB3
oleanolic acid		chemical - endogenous non-mammalian			0.0357	CDKN1A,GCLC,SLC5A1
GAB2		other			0.0357	APP,GSN,SPARC
FHIT		enzyme			0.0357	CDKN1A,RHOC,TGFB3
ELF4		transcription regulator			0.0357	CDKN1A,SPP1,TP53
PAK1		kinase			0.0357	CDKN1A,F3,TP53
bardoxolone		chemical drug			0.0357	CDKN1A,GCLC,NFKBIA
fisetin		chemical toxicant			0.0357	BIRC2,BIRC3,TP53
ATP		chemical - endogenous mammalian		-0.64	0.036	CD14,F3,GCLC,SPHK1,TP53,TXN
L-glutamic acid		chemical - endogenous mammalian		-1.718	0.036	APP,CDKN1A,FMO2,JUN,JUNB,TP53
DNMT3B		enzyme		-0.152	0.0362	ACTB,APP,CDKN1A,MYH14,MYL6,RPL10A,SERPINB9,TIMP3
INSR		kinase			0.0373	ANKRD1,Calm1 (includes others),CDKN1A,CTSV,EDN1,IER3,IGF1,JUNB,LGALS1,MARCKSL1,NFKB2,NGF,RHOB,RPL5,TGFB3
losartan potassium		chemical drug		1.387	0.0374	ATP1A1,EDN1,F3,SPP1,TGFB2,TGFB3
maslinic acid		chemical - endogenous non-mammalian			0.0374	CD47,ITGA3,JUNB,SLC5A1,TP53
amphetamine		chemical drug	Inhibited	-2.129	0.0374	CD47,F3,JUN,JUNB,TP53
1810019D21Rik		other		0	0.0375	CDKN1A,EDN1,GPX1,SYNE1
IL11		cytokine			0.0375	IGF1,JUNB,SPHK1,SPP1
PRKCB		kinase			0.0375	APP,CDKN1A,JUN,RELB
pravastatin		chemical drug			0.0375	APP,RHOU,SDC4,TP53
lovastatin		chemical drug		-0.133	0.038	CDKN1A,IGF1,RHOB,RHOC,RHOU,SDC4,TP53
KDM6A		enzyme			0.0385	PAH,TM4SF4,TTR
TERC		other			0.0385	CDKN1A,CLU,TUBB2A
diclofenac		chemical drug			0.0385	APP,CDKN1A,CLDN4
lactic acid		chemical - endogenous mammalian			0.0385	BSG,IGF1,TXN
sodium orthovanadate		chemical reagent			0.0385	CDKN1A,NFKBIA,TP53
BTK		kinase		-0.827	0.0387	CDKN1A,ISG15,JUN,NFKB2,RELB,TP53
MAPK3		kinase		-1.715	0.039	CDKN1A,JUN,JUNB,JUND,SPP1
mir-181		microRNA		1.103	0.0395	APP,DUSP6,KLF6,TIMP3
RNF2		transcription regulator		0	0.0395	CDC14A,CDKN1A,FOXA2,TP53
chloroquine		chemical drug		-1.236	0.0395	APP,ATP1A1,TP53,TXN
cyclic GMP		chemical - endogenous mammalian			0.04	CDKN1A,MARCKSL1
ADP		chemical - endogenous mammalian			0.04	BSG,F3
lonafarnib		chemical drug			0.04	BIRC2,BIRC3
1'-acetoxychavicol acetate		chemical reagent			0.04	BIRC2,BIRC3
SIRT7		enzyme			0.04	CDKN1A,RPS21
NSD1		transcription regulator			0.04	KLF6,ZFP36L1
mir-199		microRNA			0.04	EDN1,TP53
HOXC9		transcription regulator			0.04	SPP1,TIMP3
BDKRB2		G-protein coupled receptor			0.04	EDN1,TP53
PLAGL1		transcription regulator			0.04	CDKN1A,LDHA
L-685,458		chemical - protease inhibitor			0.04	APP,TP53
gamma-tocotrienol		chemical drug			0.04	JUN,NFKBIA
calpeptin		chemical reagent			0.04	APP,TP53
deguelin		chemical drug			0.04	CDKN1A,TP53
FMR1		translation regulator		-0.12	0.0404	ALDOA,APP,PFKP,PPIA,RPSA,ST3GAL6,TF
CRNDE		other			0.0413	CDKN1A,DUSP6,RRAS
TFDP1		transcription regulator			0.0413	CDKN1A,STMN1,TP53
mir-25		microRNA			0.0413	CDKN1A,TOB1,TP53
NCSTN		peptidase			0.0413	APP,CD14,Ly6a (includes others)
NLRP12		other			0.0413	HLA-A,HLA-E,JUN
amiodarone		chemical drug			0.0413	F3,ME1,TF
DDIT3		transcription regulator		1.471	0.0415	ANKRD1,MLF1,MYCBP,PDPN,TGFB2,TSC22D3
STUB1		enzyme		0.832	0.0416	CDKN1A,JUNB,NFKB2,TP53
ELK1		transcription regulator		-0.655	0.0416	CDKN1A,JUN,JUNB,SPP1
vitamin D		chemical drug		0	0.0416	CDKN1A,COMT,NFKBIA,SPP1
Histone h4		group			0.0416	CDKN1A,Mt1,RPL10A,RPL12,RPS6,SPHK1,SPP1
rifampin		chemical drug		-1.982	0.0416	ALDH1A1,CD14,CRYAB,CSF1,ENPP2,ME1,SPP1
(6E,8Z,11Z,14Z)-(5S)-5-hydroperoxyeicosa-6,8,11,14-tetraenoic acid		chemical - endogenous mammalian			0.0424	APP
L-ornithine		chemical - endogenous mammalian			0.0424	CDKN1A
PS-K		chemical drug			0.0424	BIRC2
gentamicin C1		chemical drug			0.0424	SPP1
monooleylphosphatidic acid		chemical - endogenous mammalian			0.0424	ENPP2
Cop9 Signalosome		complex			0.0424	JUN
arbutin		chemical drug			0.0424	CDKN1A
opioid receptor		group			0.0424	TXN
chartreusin		chemical reagent			0.0424	CDKN1A
dibutylnitrosamine		chemical toxicant			0.0424	TP53
Tap		complex			0.0424	HLA-E
Pdgfra-Pdgfrb		complex			0.0424	CSF1
macimorelin		biologic drug			0.0424	EDN1
nitrosomethylurethane		chemical reagent			0.0424	TP53
piracetam		chemical drug			0.0424	TP53
silipide		chemical drug			0.0424	TP53
GMNC		other			0.0424	FOXJ1
2,4,5-trichlorophenoxyacetic acid		chemical toxicant			0.0424	GCLC
polytef		chemical reagent			0.0424	F3
LEPROT		other			0.0424	IGF1
GNAT3		enzyme			0.0424	SLC5A1
USP42		peptidase			0.0424	CDKN1A
ZIC5		transcription regulator			0.0424	PDGFD
EIF4B		translation regulator			0.0424	ISG15
EPB42		transporter			0.0424	CD47
FAM168A		other			0.0424	NFKBIA
FBXL12		other			0.0424	CDKN1A
ADRM1		other			0.0424	NFKBIA
RER1		other			0.0424	APP
LEPROTL1		other			0.0424	IGF1
MEX3C		other			0.0424	IGF1
RTN3		other			0.0424	APP
MAGEA2/MAGEA2B		other			0.0424	CDKN1A
SLC9A6		transporter			0.0424	APP
RANBP10		other			0.0424	CD63
ADGRG1		G-protein coupled receptor			0.0424	IGF1
FUZ		other			0.0424	FOXA2
RTN2		other			0.0424	APP
ADNP		transcription regulator			0.0424	TP53
SETX		enzyme			0.0424	ACTB
ZBTB49		transcription regulator			0.0424	CDKN1A
leteprinim		chemical drug			0.0424	NGF
BATF2		other			0.0424	JUN
lauroylcarnitine		chemical - endogenous mammalian			0.0424	CLDN4
RNF126		enzyme			0.0424	CDKN1A
NAT8		transcription regulator			0.0424	APP
WDR13	0.285	other			0.0424	CDKN1A
SGS742		chemical drug			0.0424	NGF
VANGL2		other			0.0424	SDC4
MIR31HG		other			0.0424	CDKN1A
ZNF366		transcription regulator			0.0424	TSC22D3
SENP5		peptidase			0.0424	BIRC2
Raet1a		other			0.0424	HLA-A
ACER3		enzyme			0.0424	CDKN1A
PROTEASE		group			0.0424	F3
BACE1-AS		other			0.0424	APP
PX 478		chemical drug			0.0424	LDHA
MYO1C		enzyme			0.0424	GSN
ZMAT3		other			0.0424	TP53
SORCS1		transporter			0.0424	APP
SPR		enzyme			0.0424	IGF1
clusterin antisense oligonucleotide		biologic drug			0.0424	CLU
AP1M1		transporter			0.0424	HLA-A
PF-4929113		chemical drug			0.0424	TP53
SPON1		other			0.0424	APP
SNCAIP		transcription regulator			0.0424	TP53
Til1		other			0.0424	SPP1
SRD5A2		enzyme			0.0424	Mt1
ZNF224		transcription regulator			0.0424	ALDOA
SLC11A2		transporter			0.0424	APP
CELA1	0.528	peptidase			0.0424	HLA-A
HPGD		enzyme			0.0424	CDKN1A
APBA1		transporter			0.0424	APP
DPP10-AS1		other			0.0424	TIMP3
SYMPK		other			0.0424	CLDN2
AMD1		enzyme			0.0424	Tmsb4x (includes others)
NMB		other			0.0424	JUN
SCGN		other			0.0424	TP53
IGFALS		other			0.0424	IGF1
miR-296-3p (miRNAs w/seed AGGGUUG)		mature microRNA			0.0424	JUNB
mir-504		microRNA			0.0424	TP53
mir-663		microRNA			0.0424	HSPG2
miR-758-5p (and other miRNAs w/seed GGUUGAC)		mature microRNA			0.0424	TP53
miR-1195 (miRNAs w/seed GAGUUCG)		mature microRNA			0.0424	IGF1
ELAC2		enzyme			0.0424	CDKN1A
SALL2		transcription regulator			0.0424	CDKN1A
CCNG1	0.443	other			0.0424	TP53
PCBD1		transcription regulator			0.0424	PAH
SLC8A1		transporter			0.0424	EDN1
CDC7		kinase			0.0424	TP53
IDE		peptidase			0.0424	APP
Raet1d/Raet1e		other			0.0424	HLA-A
UBE4B		enzyme			0.0424	TP53
ITM2B	0.39	other			0.0424	APP
PEX2		other			0.0424	CDKN1A
NASP		other			0.0424	CDKN1A
CCT5		other			0.0424	CDKN1A
NKIRAS1		enzyme			0.0424	CHUK
RPS6	-0.299	other			0.0424	TP53
VANGL1	0.337	other			0.0424	JUN
STEAP3		transporter			0.0424	TP53
BCLAF1	0.433	transcription regulator			0.0424	TP53
MYL2		other			0.0424	CD151
DDX24		enzyme			0.0424	CDKN1A
ING2		transcription regulator			0.0424	SPP1
EDIL3		other			0.0424	TP53
MVK		kinase			0.0424	TP53
PGAM1		phosphatase			0.0424	CDKN1A
SORL1		transporter			0.0424	APP
SVIL		other			0.0424	TP53
Hsf4		transcription regulator			0.0424	CRYAB
ING5		other			0.0424	CDKN1A
KHDRBS2		other			0.0424	CDKN1A
MTHFR		enzyme			0.0424	APP
BIN1		other			0.0424	APP
cycloastragenol		chemical reagent			0.0424	CDKN1A
GALR2		G-protein coupled receptor			0.0424	CDKN1A
silvestrol		chemical - endogenous non-mammalian			0.0424	JUN
RPS25		other			0.0424	TP53
TAGLN		other			0.0424	TP53
FRAT1		other			0.0424	JUN
ralimetinib		chemical drug			0.0424	SPP1
RHCE/RHD		transporter			0.0424	CD47
CDO1		enzyme			0.0424	IGF1
CGGBP1		transcription regulator			0.0424	CDKN1A
DDX20		transcription regulator			0.0424	TP53
PICALM		other			0.0424	APP
NDUFS1		enzyme			0.0424	GPX1
CRTAP		other			0.0424	CDKN1A
Cops2		transcription regulator			0.0424	CDKN1A
NAT8B		enzyme			0.0424	APP
Nedd4		enzyme			0.0424	TP53
APH1B		peptidase			0.0424	TP53
SNRPA		other			0.0424	APP
VNN1		enzyme			0.0424	TP53
NGB		transporter			0.0424	APP
ZFYVE16		other			0.0424	CDKN1A
securinine		chemical reagent			0.0424	CDKN1A
polyethylene glycol		chemical drug			0.0424	CDKN1A
amsacrine		chemical drug			0.0424	JUN
canertinib		chemical drug			0.0424	F3
palytoxin		chemical toxicant			0.0424	DUSP6
telomestatin		chemical - endogenous non-mammalian			0.0424	CDKN1A
ephedrine		chemical drug			0.0424	TXN
kynurenic acid		chemical - endogenous mammalian			0.0424	CDKN1A
sarpogrelate		chemical drug			0.0424	F3
methiothepin		chemical drug			0.0424	F3
milrinone		chemical drug			0.0424	F3
8-methyl-pyridoxatin		chemical reagent			0.0424	TF
dimethyl succinate		chemical - endogenous mammalian			0.0424	BSG
necrostatin-1s		chemical reagent			0.0424	APP
dilazep		chemical drug			0.0424	F3
talipexole		chemical drug			0.0424	TP53
cidofovir		chemical drug			0.0424	TP53
bivalirudin		biologic drug			0.0424	F3
(S)-flurbiprofen		chemical drug			0.0424	JUNB
1-o-hexadecyl-2-o-methyl-rac-glycerol		chemical - kinase inhibitor			0.0424	CDKN1A
fenoprofen		chemical drug			0.0424	APP
AGI-1095		chemical reagent			0.0424	F3
lavendustin A		chemical - kinase inhibitor			0.0424	EDN1
SC144		chemical reagent			0.0424	ENPP2
hdm-2 antagonistic peptide		chemical reagent			0.0424	CDKN1A
NPM1-RARA		fusion gene/product			0.0424	TP53
Alocasia cucullata root extract		chemical reagent			0.0424	CD14
HL001		chemical reagent			0.0424	TP53
pyrilamine		chemical drug			0.0424	NGF
lanreotide		biologic drug			0.0424	IGF1
Z-IL-CHO		chemical - protease inhibitor			0.0424	APP
MW167		chemical - protease inhibitor			0.0424	TP53
endomorphin-2		chemical - endogenous mammalian			0.0424	EDN1
KT 5926		chemical - kinase inhibitor			0.0424	CD14
N(omega)-hydroxyarginine		chemical - endogenous mammalian			0.0424	CDKN1A
methyl alpha-D-glucopyranoside		chemical reagent			0.0424	SLC5A1
dextran sulfate		chemical drug			0.0431	CD14,ENPP2,GSTM5,ISG15,MNS1,Pvr,SPHK1,STMN1,TGFB2,TGFB3,TIMP2
LDLR		transporter			0.0436	CD47,CDKN1A,F3,HSPG2,IER3,MFGE8,PSME2,Serpinb6b,SPP1
miR-204-5p (and other miRNAs w/seed UCCCUUU)		mature microRNA	Activated	2	0.0438	ARPC1B,SOX4,SPARC,TGFB3
seocalcitol		chemical drug		0.106	0.0438	ANKRD1,CDKN1A,IGFBP5,NGF
SHH		peptidase		-1.622	0.0439	FOXA2,IGF1,IGFBP5,LASP1,SPP1,TGFB2,TGFB3,TSC22D3
hemin		chemical - endogenous mammalian	Activated	2.131	0.0441	CDKN1A,IGF1,JUN,SPP1,TXN
NPM1	-0.358	transcription regulator			0.0443	CSF1,NPM1,TP53
GNRH		group			0.0443	IGFBP5,JUN,PHB
TRH		other			0.0443	ACTB,JUN,JUNB
XDH		enzyme			0.0443	F3,SPP1,TIMP2
MSX2		transcription regulator			0.0443	SPP1,TGFB2,TGFB3
GNB2		enzyme			0.0443	CDKN1A,IER3,TSC22D3
histone deacetylase inhibitor		chemical drug			0.0443	CDKN1A,GSN,TP53
JQ1		chemical reagent	Activated	2.412	0.0445	BIRC3,ISG15,NFKB2,Oasl2,SH2D4A,TUBB
TLR7		transmembrane receptor	Inhibited	-2.01	0.0447	CDKN1A,CLDN6,CREB5,IER3,ISG15,JUNB,MLPH,NFKBIA,TP53
YY1		transcription regulator			0.045	ANKRD1,CAPG,CDKN1A,CLU,CRYAB,DNAJB4,EEF1B2,IGFBP5,TGFB2,TP53,WSB1
CSF2RB		transmembrane receptor			0.045	JUN,JUNB
GC-GCR dimer		complex			0.045	NFKBIA,TSC22D3
COL1A1		other			0.045	CDKN1A,EDN1
DPH5		enzyme			0.045	NFKBIA,TP53
HIF1AN		enzyme			0.045	ANKRD37,LDHA
H1-2		other			0.045	ACTB,IER3
MIR101		group			0.045	IGF1,STMN1
CHEK2		kinase			0.045	CDKN1A,TP53
BLNK	-0.256	other			0.045	JUN,TP53
FCGR1A		transmembrane receptor			0.045	CSF1,F3
MAPK10		kinase			0.045	APP,JUN
S1PR3		G-protein coupled receptor			0.045	IGF1,JUN
BHLHA15		transcription regulator			0.045	CLU,KRT19
RHOB	-0.586	enzyme			0.045	CDKN1A,RHOB
3-aminobenzamide		chemical toxicant			0.045	CDKN1A,TP53
4-nitroquinoline-1-oxide		chemical toxicant			0.045	CDKN1A,TP53
2-acetylaminofluorene		chemical toxicant			0.045	CDKN1A,TP53
allyl sulfide		chemical drug			0.045	GSTA3,GSTM5
Hif		complex			0.045	LDHA,TF
let-7a-5p (and other miRNAs w/seed GAGGUAG)		mature microRNA		1.245	0.045	BSG,CAPG,COL27A1,DAD1,KRT19,RABGAP1L,RHOB,SPARC
H89		chemical - kinase inhibitor		0.916	0.0455	APP,CD14,CDKN1A,IGF1,IGFBP5,NFKBIA,TXN
6-hydroxydopamine		chemical toxicant		-1.41	0.0459	GPX1,JUN,PPIB,TIMP2,TP53
Fcer1		complex			0.046	CSF1,DUSP6,JUN,SPHK1
OSMR		transmembrane receptor			0.046	BIRC3,JUNB,Mt2,Oasl2
maneb		chemical toxicant		-1	0.046	C9orf116,CEP290,MAPK15,NFAT5
sodium arsenite		chemical drug		-0.055	0.046	CDKN1A,GCLC,JUN,TP53
salmonella minnesota R595 lipopolysaccharides		chemical - endogenous non-mammalian	Inhibited	-2.4	0.046	ISG15,JUN,JUNB,NFKB2,NFKBIA,RELB
Ifn		group		-1.406	0.046	EDN1,HLA-A,IGF1,ISG15,SPP1,TP53
NUPR1	0.484	transcription regulator		-1.764	0.0462	AGRN,APOBEC3B,CD63,CHUK,CREB5,CXADR,HSPA2,KLF6,MYH10,RAB32,RELB,SAMD4A,TNIP1,TNS3,TOB1,TP53,ZFP36L1
nitrofen		chemical toxicant			0.0474	TGFB3,TIMP2,TIMP3
MBTD1		other			0.0474	NFKBIA,RPSA,SOX4
CASZ1		enzyme			0.0474	EDN1,MYOF,TGFB3
MEX3A		other			0.0474	DCLK1,PRELP,TUBA1A
NSD2		enzyme			0.0474	IGF1,JUN,RRAS
FOXA3		transcription regulator			0.0474	FOXA2,TF,TTR
TWIST2		transcription regulator			0.0474	CDKN1A,DUSP6,KLF6
SPRY2		other			0.0474	CDKN1A,CLDN7,ISG15
tempol		chemical drug			0.0474	F3,SPP1,TP53
STAT3	0.254	transcription regulator		-1.739	0.0476	ALDH1A1,CD9,CDKN1A,CTTN,EDN1,ENPP2,F3,HLA-A,IGFBP5,ISG15,JUNB,LDHA,Mt1,Muc1,NFKB2,NPM1,PHB,SERPINB9,TOB1,TP53
TCF		group			0.0477	ALDH1A1,EPCAM,JUNB,RCN1,SEMA3C
LEF1		transcription regulator		-1.413	0.0483	CDKN1A,CHCHD10,CTTN,FRMD6,SPP1,SPRY1,TP53
miR-17-5p (and other miRNAs w/seed AAAGUGC)		mature microRNA		0.09	0.0483	APP,BAMBI,CDKN1A,RHOC
ATF6	0.317	transcription regulator			0.0483	APP,DAPK1,PRDX2,SPARC
GPS2	0.3	transcription regulator		1.969	0.0483	CD14,CDKN1A,NFKBIA,RHOB
napabucasin		chemical drug	Activated	2	0.0483	ACTB,ALDH1A1,EPCAM,RPLP0
Sn50 peptide		chemical toxicant		1.969	0.0483	BIRC2,BIRC3,Casp12,TP53
8-bromo-cAMP		chemical reagent		-0.92	0.0487	APP,CLU,IGF1,JUN,PTGFR,SPP1,TGFB2,TIMP2
MITF		transcription regulator		0.333	0.0488	ATP1A1,CD151,CDKN1A,DAPK1,GPM6B,ITGA3,SEMA3C,ST3GAL6,TP53,VAT1
PRKCA		kinase		-0.972	0.0491	APP,CDKN1A,JUN,NFKBIA,TGFB2,TP53
PARP1		enzyme		-0.599	0.0491	CDKN1A,IGF1,JUN,NFAT5,TIMP2,TP53
IFNAR1		transmembrane receptor		-1.951	0.0525	CSF1,DUSP6,HLA-A,ISG15,Ly6a (includes others),Oasl2,TAPBPL
okadaic acid		chemical toxicant	Inhibited	-2.212	0.0534	APP,JUN,JUNB,JUND,SPP1
N-nitro-L-arginine methyl ester		chemical drug		-1.982	0.0616	CHUK,CSF1,CYBA,NFKBIA,TP53
FAS		transmembrane receptor	Activated	2.117	0.0625	BIRC2,BIRC3,CDKN1A,CSF1,F3,IER3,IQGAP2,JUN,JUND,NFKBIA,PTP4A1,SERPINB9,SPP1
DDX58		enzyme		-1.94	0.0658	AHNAK,ISG15,RPS7,SPP1
RPTOR		other	Inhibited	-2.213	0.066	DUSP6,JUN,LDHA,PKM,RPS6
Nfat (family)		group	Inhibited	-2.236	0.0705	KLF6,RELB,SAMD4A,SDC4,TGFB2
TRAF3IP2		other	Inhibited	-2	0.0714	CSF1,CXCL16,ISG15,TNFRSF12A
KDM5B		transcription regulator	Activated	2	0.0725	ARL6IP5,CDC14A,CYB5A,ISG15,TGFB2,TUBB2A
NEUROG3		transcription regulator	Inhibited	-2	0.0772	CD63,CTSV,RHOB,SEMA3C
miR-30c-5p (and other miRNAs w/seed GUAAACA)		mature microRNA	Activated	2.391	0.0787	CPNE8,JUN,KRT7,RAB27B,SPARC,TP53
cardiotoxin		chemical - other	Inhibited	-2.236	0.0811	CSF1,CTSV,IGF1,IGFBP7,NPM1,RPSA,SPP1
docosahexaenoic acid		chemical drug		1.914	0.0811	APP,CDKN1A,CSF1,SPHK1,TGFB2,TGFB3,TIMP2
TICAM1		other	Inhibited	-2.412	0.0897	APOBEC3B,ISG15,NFKB2,NFKBIA,RELB,RHOB
GAST		other	Inhibited	-2	0.0959	JUN,NFKBIA,PHB,RPL7
MACROH2A1		other	Activated	2	0.0992	CDKN1A,EDN1,KRT23,SPARC
Pkc(s)		group	Inhibited	-2.441	0.104	APP,CDKN1A,EDN1,F3,JUN,JUNB,KLF6,SPP1
5-O-mycolyl-beta-araf-(1->2)-5-O-mycolyl-alpha-araf-(1->1')-glycerol		chemical - endogenous non-mammalian	Inhibited	-2	0.109	IER3,NFKB2,SDC4,SPHK1
MYCL		transcription regulator		-1.982	0.113	COX7A2L,RPL10A,RPL12,RPL15
phytohemagglutinin		chemical drug		-1.757	0.12	APP,CD47,CPM,CSF1,GCLC,NME1,SOX4,SPHK1,SPP1,TIMP3
C5		cytokine	Inhibited	-2.236	0.128	CD63,CSF1,F3,NFKBIA,NGF
Salmonella enterica serotype abortus equi lipopolysaccharide		chemical toxicant	Inhibited	-2.449	0.156	BIRC3,DNAJB4,EDN1,F3,ISG15,RHOU
INHA		growth factor	Inhibited	-2	0.188	DNAH7,ITGA3,KRT18,KRT19
VIP		other		-1.969	0.201	CHUK,IGF1,LGALS1,NFKBIA
ionomycin		chemical reagent	Inhibited	-2.4	0.213	AHNAK,CLDN4,LDHA,NFAT5,NGF,SPP1
CD28		transmembrane receptor	Inhibited	-2.353	0.235	DAD1,IGFBP5,JUN,LDHA,NFKB2,NFKBIA,PHB,RHOC,RPL6,TOB1
RORA		ligand-dependent nuclear receptor		-1.96	0.237	ACTB,GPX1,IGF1,Mt1,Mt2,NFKBIA
DUSP1	-0.414	phosphatase		1.982	0.237	DUSP6,IER3,JUN,TGFB2
10E,12Z-octadecadienoic acid		chemical - endogenous mammalian		1.982	0.259	CREB5,FMO2,IGF1,ME1,NFAT5
GW3965		chemical reagent		1.935	0.261	APP,IER3,NFKBIA,Serpinb6b
TET2		enzyme	Inhibited	-2	0.362	AHNAK,CA8,CYP2S1,EPCAM
GATA1		transcription regulator	Inhibited	-2	0.442	CNN3,FSD1L,JUNB,RPL22,RPL27A,RPS11,ST3GAL6
lenalidomide		chemical drug	Inhibited	-2	1	ACTG1,CTTNBP2,S100A16,TNS3
tazemetostat		chemical drug	Inhibited	-2.449	1	ANKRD1,LGALS1,PAK3,SEMA3C,SPP1,TP53
SP2509		chemical reagent	Inhibited	-2.449	1	ANKRD1,LGALS1,PAK3,SEMA3C,SPP1,TP53
