# Supplementary material for: Single-cell transcriptome analysis defines heterogeneity of the murine pancreatic ductal tree
Source: eLife. 2021 May 19;10:e67776. doi: 10.7554/eLife.67776 (PMC8184217; doi:10.7554/eLife.67776)
Supplement: Figure 2—source data 1. [file elife-67776-fig2-data1.xlsx]

## Sheet: Cluster vs all-duct DBA+ cells
gene	avg_logFC	p_val_adj	cluster
Spp1	0.65562	3.62e-115	0
Ccnd1	0.86606	5e-109	0
Gmnn	0.719768	2.15e-81	0
Wfdc3	0.655494	8.3e-72	0
Adamts1	0.715474	3.83e-70	0
Wfdc18	0.590571	5.71e-62	0
Apoe	0.373485	1.24e-61	0
Kcne3	0.619114	1.4e-55	0
Aldoc	0.56651	1.81e-54	0
1700049E15Rik	0.587627	4.87e-54	0
Spon1	0.456981	6.4e-52	0
Mmd2	0.469302	1.16e-48	0
Rhov	0.463258	2.07e-46	0
Cbs	0.464832	3.65e-46	0
Hs6st2	0.453459	9.48e-46	0
Oat	0.478821	1.25e-44	0
Igfbpl1	0.369205	8.64e-39	0
Dbi	0.257809	4.38e-38	0
Lifr	0.440851	2.49e-36	0
Pebp1	0.294082	3e-35	0
Cftr	0.430587	1.08e-34	0
Nudt19	0.389523	3.58e-33	0
Degs1	0.381649	1.01e-32	0
Ncald	0.393942	1.33e-31	0
Gm37350	0.629093	9.01e-30	0
Crp	0.407205	1.81e-28	0
Ptgds	0.349878	2.66e-28	0
Gucy1a3	0.306665	1.96e-27	0
Mme	0.357451	7.79e-27	0
Pigr	0.393698	3.79e-25	0
Scd2	0.352634	5.12e-25	0
Snhg18	0.312353	9.9e-25	0
3110079O15Rik	0.369134	1.28e-24	0
Nav2	0.317455	9.93e-24	0
Fmo1	0.312878	6.07e-23	0
Prelp	0.32846	6.73e-23	0
Olfml2a	0.251164	1.52e-22	0
Lbh	0.305492	5.05e-22	0
Rhoj	0.337011	2.61e-21	0
Ecscr	0.346813	6.16e-21	0
Cldn10	0.306698	6.73e-21	0
Hilpda	0.327001	5.9e-20	0
Adamts9	0.296492	4.03e-19	0
Rtn4	0.289098	5.11e-19	0
Rcn1	0.268674	1.12e-18	0
Lipt2	0.292482	1.2e-18	0
Id2	0.305296	2.91e-18	0
Mia	0.291525	2.35e-17	0
Myo1b	0.251462	6.35e-17	0
Qsox1	0.276933	3.36e-16	0
Vsig10	0.281036	2.51e-15	0
Gpx2	0.25689	5.3e-15	0
4931406C07Rik	0.26676	8.27e-15	0
Cald1	0.262705	7.41e-14	0
Hes1	0.388806	4.8e-13	0
Eno1	0.263851	6.94e-13	0
Tgfb2	0.256367	6.07e-12	0
Apoc1	0.327235	5.79e-05	0
Fxyd3	0.609129	5.72e-51	1
Anxa5	0.400405	1.15e-48	1
Cp	0.484544	1.71e-45	1
Igfbp7	0.485681	7.6e-33	1
Ppp1r1b	0.65548	9.41e-33	1
Rab27b	0.566206	1.48e-29	1
Tns1	0.543534	5.17e-27	1
Adam33	0.543691	6.38e-27	1
Timp3	0.519823	4.59e-25	1
Pah	0.475605	3.75e-16	1
Ly6e	0.270987	7.06e-14	1
Bmyc	0.371835	1.22e-11	1
Kifc3	0.302026	1.76e-11	1
Pdzk1ip1	0.314802	3.41e-11	1
Igf1	0.404142	4.91e-11	1
Fmo2	0.292252	9.7e-10	1
Csrp2	0.356085	2.51e-09	1
Aldh1a1	0.365729	1.16e-07	1
Sema3c	0.370547	8.49e-07	1
Cd14	0.346042	1.28e-06	1
Pnrc1	0.273934	1.15e-05	1
Cttnbp2	0.283818	3.66e-05	1
Anxa3	0.256941	0.000348137	1
Ifi27	0.254358	0.000494742	1
Sh2d4a	0.276266	0.0018812	1
Slc6a6	0.291218	0.00258888	1
Tacc2	0.28794	0.0111676	1
Tsc22d3	0.305135	0.0139577	1
Cisd1	0.278662	0.0158563	1
St3gal5	0.303325	0.0259224	1
Apoe	0.311993	7.07e-33	2
Spp1	0.346081	3.43e-25	2
Ccnd1	0.292537	4.15e-13	2
Sult1a1	0.389401	2.24e-11	2
Snhg18	0.268359	1.36e-08	2
Adamts1	0.296869	6.67e-06	2
Hes1	0.399806	1.71e-05	2
Oat	0.273884	1.77e-05	2
Aldoc	0.310277	2.05e-05	2
Cbs	0.308939	2.09e-05	2
Pigr	0.261213	0.000153854	2
Wfdc3	0.256473	0.00120538	2
Fam183b	2.50033	0	3
Tppp3	2.65867	3.36e-237	3
Dynlrb2	1.49353	3.37e-237	3
Cfap44	1.28247	8.6e-202	3
Cyp2s1	1.69574	8.14e-201	3
Foxj1	2.19045	1.09e-190	3
BC051019	1.13391	1.73e-186	3
1700016K19Rik	1.53456	6.46e-181	3
Rsph4a	1.10577	9.81e-179	3
Odf3b	1.05964	1.48e-169	3
Cdkn1a	1.76873	2.37e-169	3
3300002A11Rik	0.9707	4.71e-154	3
1700007K13Rik	1.26452	5.1e-153	3
Calml4	1.04508	9.23e-153	3
Dnah9	0.931283	4.61e-152	3
Ttll3	1.03822	3.51e-142	3
Tmem212	1.33345	7.17e-142	3
Mns1	1.24721	1.31e-139	3
Tekt1	0.873036	5.75e-137	3
Riiad1	1.0357	9.75e-137	3
Gm29538	0.891312	3.22e-136	3
Fam166b	0.867976	4.88e-136	3
1110017D15Rik	1.33728	4.88e-136	3
Wdr66	0.974247	1.06e-131	3
Drc7	0.716511	6.96e-130	3
Agr3	0.913438	9.67e-128	3
Spag6l	0.877208	2.16e-125	3
Meig1	0.973412	2.68e-125	3
Iqca	0.744001	8.09e-124	3
Pifo	0.800401	6.56e-122	3
Cfap45	0.857715	4.86e-118	3
1700001C02Rik	0.702778	1.28e-117	3
Rsph1	1.05869	1.65e-115	3
Tctex1d4	0.74228	2.52e-115	3
Vpreb3	1.14533	2.77e-111	3
Cfap54	0.896078	3.21e-111	3
Efcab10	0.793941	2.93e-109	3
Dnah6	0.737896	1.54e-107	3
Dnali1	0.898225	2.87e-107	3
Fam216b	0.660855	8.48e-106	3
Enkur	1.11453	3.43e-104	3
2410004P03Rik	0.817936	4.08e-104	3
Aebp1	0.98754	2.77e-101	3
Pdxk	1.37703	2.62e-96	3
Lrrc36	0.632287	7.29e-96	3
Spef2	0.894861	6.66e-94	3
Ttll6	0.644874	9.54e-94	3
Dnah5	0.567617	1.5e-93	3
Bambi	1.52816	3.87e-92	3
Ankrd65	0.549301	9.85e-92	3
Erich3	0.63801	2.54e-91	3
1700026L06Rik	0.7269	7.88e-91	3
Cfap126	1.14708	1.65e-90	3
Cfap43	0.74503	1.71e-90	3
Uox	0.613307	5.21e-90	3
Tubb4b	1.65113	4.89e-88	3
Lrrc23	0.675454	6.85e-88	3
Armc4	0.482639	1.18e-87	3
Srsf10	1.6764	5.86e-86	3
Wdr63	0.543152	2.13e-85	3
Igfbp5	1.03934	1.93e-84	3
Spag16	0.482422	8.84e-84	3
Cfap206	0.684312	1.78e-83	3
Ccdc39	0.88467	9e-82	3
Cfap77	0.664384	1.67e-81	3
Timp4	1.06204	1.27e-80	3
Tuba1a	1.53566	3.54e-80	3
Smim5	1.26506	4.82e-80	3
Uckl1os	0.529152	1.27e-79	3
Dnajb13	0.719207	1.89e-78	3
Ccdc40	0.556699	3.92e-78	3
Enpp2	0.672473	5.56e-78	3
Eno4	0.52706	7.11e-77	3
Mapk15	0.869733	1.9e-73	3
Drc1	0.574742	1.9e-72	3
Tm4sf1	1.29006	3.62e-71	3
Mlf1	0.721561	4.56e-70	3
Lrriq1	0.804097	5.3e-70	3
Ppil6	0.894979	1.7e-69	3
Prr29	0.546019	4.32e-69	3
Cpm	0.633203	5.08e-67	3
Iqub	0.617056	9.66e-67	3
Diras2	0.486076	9.93e-67	3
Cfap69	0.594632	7.58e-66	3
Cdc14a	0.815783	1.03e-65	3
Aadac	0.967966	7.32e-65	3
4933434E20Rik	1.27528	2.43e-63	3
Calm1	0.996958	1.84e-62	3
Dnah11	0.759117	3.61e-62	3
Lrrc51	0.655771	1.5e-61	3
Ccdc30	0.760492	9.36e-61	3
Mak	0.570561	8.49e-60	3
Ttc25	0.62265	4.45e-59	3
Fam213a	1.13048	9.02e-58	3
1700013F07Rik	0.549892	1.76e-56	3
Nudt4	1.18164	3.04e-56	3
Chchd10	1.22099	4.25e-56	3
Trf	1.28537	1.05e-55	3
Fhad1	0.646687	3.09e-55	3
Wdr78	0.783036	1.1e-54	3
Ambp	0.923459	4.51e-54	3
Cfap53	0.616075	1.23e-53	3
Kif9	0.758334	1.26e-51	3
Usp2	0.781967	8.86e-51	3
Maats1	0.497887	2.75e-50	3
Ankrd37	0.565193	6.54e-50	3
Cdh4	0.513386	4.91e-49	3
Zmynd10	0.521509	6.55e-49	3
Aldoa	0.830206	1.58e-48	3
Fsd1l	0.561092	1.78e-47	3
Ubxn10	0.519813	5.6e-46	3
Dynll1	1.02205	7.92e-46	3
Efhb	0.528478	3.21e-44	3
Pih1d2	0.677477	1.92e-43	3
Chuk	0.762345	1.24e-42	3
Rsph9	0.88646	5.16e-42	3
Cldn2	0.642197	1.07e-41	3
Dusp18	0.665359	1.08e-41	3
Iqcg	0.719791	1.15e-41	3
Tmem107	0.893175	1.47e-41	3
Nek1	0.74334	1.76e-41	3
Hipk1	0.920343	3.81e-41	3
Cep126	0.851271	1.37e-39	3
1700088E04Rik	0.878893	7.67e-39	3
Elof1	0.973487	8.21e-39	3
Nme5	0.846931	2.42e-38	3
Dsg2	0.697698	6.43e-38	3
Mt2	1.52872	7.71e-38	3
Erich2	0.511814	1e-37	3
Sfxn2	0.707902	2.75e-37	3
Cfap70	0.470383	1.26e-36	3
Spef1	0.534054	2.19e-35	3
Dnah7b	0.586623	4.45e-35	3
Mt1	1.36394	6.15e-34	3
Ly6c1	1.18899	1.23e-33	3
Rfx3	0.638608	3.55e-33	3
St3gal6	0.846973	3.88e-33	3
Nudc	0.698027	1.41e-32	3
Traf3ip1	0.602864	2.38e-32	3
Crip2	0.697136	4.84e-32	3
Anxa11	0.750127	6.89e-32	3
Ccnd2	1.80613	5.63e-31	3
Saxo2	0.581445	1.48e-30	3
Kcnq1ot1	0.970516	2.07e-30	3
Ctxn1	0.747432	3.55e-30	3
Akap9	0.738413	4.43e-30	3
D630024D03Rik	0.575213	8.92e-30	3
Ttc30b	0.61987	1.49e-29	3
Cep83	0.56527	1.22e-28	3
Slc35e3	0.495862	2.48e-28	3
Hnf4a	0.385849	2.94e-28	3
Baiap2	0.673102	3.03e-28	3
Ccdc189	0.534636	2.96e-27	3
Oscp1	0.563416	5.01e-27	3
Ulk4	0.418925	7.62e-27	3
Ctsh	0.677589	1.21e-26	3
1110004E09Rik	0.803115	4.71e-26	3
Stard5	0.420404	8.55e-26	3
Ttr	0.722631	8.56e-26	3
Gsto1	0.432112	9.79e-26	3
Cspp1	0.688992	2.4e-25	3
Ankrd44	0.782293	1.09e-24	3
Cmtm8	0.72376	1.84e-24	3
Efcab2	0.535597	4.22e-24	3
Emc6	0.745435	4.71e-24	3
Ccdc157	0.469988	7.92e-24	3
Ptges3	0.683027	7.99e-24	3
Dalrd3	0.742004	8.41e-24	3
Adck4	0.514074	9.28e-24	3
Fam47e	0.653366	9.37e-24	3
Dync2h1	0.561929	1.84e-23	3
Ubxn11	0.441662	3.7e-23	3
Prdx5	0.704576	4.84e-23	3
Cetn4	0.584946	5.36e-23	3
Gclc	0.60651	5.72e-23	3
Aldh3b1	0.516825	6.93e-23	3
Rabl2	0.490141	1.67e-22	3
Tcea3	0.528892	4.1e-22	3
Txn1	0.554922	4.25e-22	3
Nek5	0.525237	5.21e-22	3
Hspa2	0.581335	5.67e-22	3
Capsl	0.781427	1.32e-21	3
Pacrg	0.420828	1.71e-21	3
Bphl	0.670479	2.92e-21	3
Ifitm3	0.817579	4.38e-21	3
Nceh1	0.626294	4.59e-21	3
Mycbpap	0.409708	7.01e-21	3
Hspa4l	0.573263	9.59e-21	3
Tob1	0.72561	1.04e-20	3
Cry2	0.5111	4.99e-20	3
Acsl3	0.653156	5.54e-20	3
Endog	0.518237	2.16e-19	3
Strbp	0.636182	2.83e-19	3
Tm4sf4	0.469223	3.35e-19	3
Dzip1l	0.573015	4.66e-19	3
Dapk1	0.682684	5.87e-19	3
Ccdc162	0.456727	1.1e-18	3
Odf2l	0.581988	1.14e-18	3
B4galt1	0.437564	2.41e-18	3
Rab36	0.490161	2.42e-18	3
Smim6	0.636011	3.24e-18	3
Clic6	0.529141	4.14e-18	3
Ddx5	0.452042	7.93e-18	3
Mycbp	0.659199	1.54e-17	3
Ift74	0.590956	1.81e-17	3
Ccdc171	0.413133	4.75e-17	3
Ddit4l	0.584757	5.63e-17	3
Cdc42ep3	0.377951	5.68e-17	3
Ift81	0.570338	6.82e-17	3
Gas6	0.395254	1.79e-16	3
Trim37	0.563281	2.05e-16	3
Tmem67	0.471824	2.06e-16	3
D1Ertd622e	0.44443	2.16e-16	3
Spa17	0.5177	5.84e-16	3
Rpgr	0.445702	8.59e-16	3
Naaa	0.385602	1.09e-15	3
Gm1673	0.454153	1.91e-15	3
Ccdc191	0.553706	4.01e-15	3
Wdr60	0.564299	8.11e-15	3
D430042O09Rik	0.553981	8.32e-15	3
Rbm39	0.359587	1.4e-14	3
Eml2	0.518913	1.43e-14	3
Mcee	0.555673	2.04e-14	3
Foxa2	0.509649	2.25e-14	3
Rpgrip1l	0.495385	2.27e-14	3
Ift88	0.439883	2.51e-14	3
Ift46	0.468663	4.31e-14	3
Hsph1	0.508159	1.14e-13	3
Ift122	0.452655	1.21e-13	3
Arvcf	0.48202	2.52e-13	3
Dek	0.46809	3.35e-13	3
Nipal3	0.412727	5.35e-13	3
Ccbl1	0.394154	5.84e-13	3
1110032A03Rik	0.53806	6.25e-13	3
Ift57	0.513709	7.56e-13	3
Bri3	0.482649	1.12e-12	3
Ptma	0.250884	1.38e-12	3
Trp53inp1	0.498642	1.48e-12	3
Gstm1	0.46224	1.57e-12	3
Bok	0.455747	2.17e-12	3
B9d1	0.502655	2.19e-12	3
Fam216a	0.442893	2.32e-12	3
Plet1	0.486759	5.4e-12	3
Nfe2l1	0.522359	5.72e-12	3
Ccpg1os	0.547396	6.06e-12	3
2410089E03Rik	0.419087	9.32e-12	3
Rabgap1l	0.503374	1.58e-11	3
mt-Nd2	0.259914	1.84e-11	3
Polk	0.433341	3.11e-11	3
Pdlim5	0.427077	4.09e-11	3
Lca5	0.408204	4.12e-11	3
Ccng1	0.484416	4.48e-11	3
Cfap20	0.516747	7.34e-11	3
Dusp6	0.53411	8.87e-11	3
Man1a	0.464841	9.14e-11	3
B9d2	0.382191	9.95e-11	3
Tmem109	0.385012	1.24e-10	3
Ppp1r16a	0.38618	1.74e-10	3
Slc39a4	0.588043	1.83e-10	3
Rara	0.394572	1.97e-10	3
Rps27l	0.337945	2.66e-10	3
Cep290	0.488284	3.33e-10	3
Ift22	0.417678	4.61e-10	3
Ralgds	0.389949	4.79e-10	3
Psmc3ip	0.362902	5.03e-10	3
Txnip	0.462787	9.43e-10	3
Dsp	0.416493	1.05e-09	3
Gstz1	0.435513	1.31e-09	3
Selenbp1	0.481527	1.33e-09	3
Ier5	0.33966	1.41e-09	3
Cfap36	0.508779	1.57e-09	3
Arhgap5	0.382011	1.64e-09	3
Pttg1	0.524598	2.36e-09	3
Mdm2	0.419198	2.65e-09	3
Eif4g3	0.433777	3.22e-09	3
Asap1	0.364599	4.16e-09	3
Trp53bp2	0.50713	6.04e-09	3
Ccdc34	0.389812	6.89e-09	3
Nupr1	0.657989	7.17e-09	3
Cry1	0.377299	7.97e-09	3
Foxp1	0.388685	9.18e-09	3
C2cd4b	0.555837	9.6e-09	3
Clmn	0.410464	1.13e-08	3
Sclt1	0.330302	1.35e-08	3
Ccdc173	0.385334	1.68e-08	3
Golgb1	0.428242	2.2e-08	3
Wnt4	0.444773	2.77e-08	3
Hsp90aa1	0.385342	3.18e-08	3
Sned1	0.443969	3.96e-08	3
Ids	0.444639	4.74e-08	3
Fos	0.505744	5.48e-08	3
Atxn1	0.459672	5.78e-08	3
Smad5	0.397289	5.79e-08	3
Odf2	0.337399	1.11e-07	3
Mr1	0.311414	1.25e-07	3
Morn2	0.40735	1.26e-07	3
Crip1	0.48316	1.34e-07	3
Bax	0.429077	1.5e-07	3
Slc7a4	0.319091	1.56e-07	3
Tbc1d32	0.322437	1.72e-07	3
Pde4d	0.323911	1.98e-07	3
Atp11a	0.400118	2.19e-07	3
Bclaf1	0.439486	2.65e-07	3
Plxnb2	0.429439	2.67e-07	3
Prpf4b	0.39777	2.97e-07	3
Llgl2	0.385434	3.03e-07	3
Spice1	0.292587	3.07e-07	3
Arl13b	0.395698	4.16e-07	3
Syne1	0.39277	4.18e-07	3
Fam60a	0.384861	5.06e-07	3
Abr	0.387412	6.65e-07	3
Irak1bp1	0.386963	7.24e-07	3
Ccdc181	0.389795	9.78e-07	3
Pnrc2	0.424518	1.19e-06	3
Znhit1	0.405503	1.36e-06	3
Mpc1	0.446175	1.49e-06	3
Lgals3	0.278236	1.76e-06	3
9530053A07Rik	0.323421	1.77e-06	3
Creld2	0.38707	2.02e-06	3
Peg3	0.42013	2.34e-06	3
Sec24b	0.339516	2.6e-06	3
Ift43	0.440201	2.73e-06	3
Atp1a1	0.296064	3.21e-06	3
Ruvbl1	0.379344	4.73e-06	3
Erich5	0.407147	4.74e-06	3
Calm3	0.324031	5.02e-06	3
Esyt2	0.317733	5.36e-06	3
Akap13	0.43892	5.88e-06	3
Bola1	0.431987	7.07e-06	3
Med25	0.372784	8.11e-06	3
Naf1	0.390275	8.96e-06	3
Rogdi	0.379898	9.71e-06	3
Palmd	0.307511	1e-05	3
Wdr34	0.320632	1.08e-05	3
Oxct1	0.40364	1.15e-05	3
Acot1	0.393795	1.18e-05	3
Adipor2	0.343152	1.2e-05	3
Macrod1	0.378082	1.21e-05	3
Tcp11l2	0.279686	1.22e-05	3
Lyn	0.338796	1.44e-05	3
Mef2a	0.375354	1.82e-05	3
Fbxo32	0.346308	2.03e-05	3
Itgb4	0.29582	2.16e-05	3
Alb	0.530047	2.19e-05	3
Lgals3bp	0.41926	2.2e-05	3
Cuedc1	0.356715	2.4e-05	3
Kif3a	0.403942	2.57e-05	3
Ruvbl2	0.312281	2.98e-05	3
Sf3b2	0.335913	3.04e-05	3
Appl2	0.324684	3.75e-05	3
Atxn2	0.32804	4.05e-05	3
Ift80	0.297038	4.51e-05	3
Iqgap2	0.422995	4.77e-05	3
Prkcz	0.302102	4.88e-05	3
Vangl1	0.36811	5.44e-05	3
Zcchc11	0.392851	5.84e-05	3
Hdgfrp2	0.285734	7.02e-05	3
Kifap3	0.341029	7.11e-05	3
Irf2bp2	0.358838	8.41e-05	3
Cep104	0.284213	8.64e-05	3
Tctex1d2	0.332932	9.34e-05	3
Spata6	0.339442	9.67e-05	3
Med31	0.366543	0.000117133	3
Arhgap1	0.322569	0.000119817	3
Chchd6	0.380498	0.000142658	3
Cers6	0.297875	0.000149964	3
Cxcl12	0.488875	0.000167025	3
Golim4	0.427322	0.000189739	3
Sbf2	0.322443	0.000201652	3
Pcm1	0.375447	0.000207331	3
Arl8a	0.266378	0.000218994	3
Meis2	0.344994	0.00025257	3
Ccdc148	0.314935	0.000255886	3
Rassf9	0.397998	0.000256739	3
Fam179b	0.305133	0.000302874	3
Fbxw9	0.273904	0.000378291	3
Marcks	0.314586	0.000380764	3
Tomm7	0.302357	0.000391082	3
Mid1ip1	0.37637	0.000456937	3
Ift27	0.321774	0.000521634	3
Tex9	0.290438	0.000584811	3
Vezf1	0.357843	0.00073646	3
Fam160b1	0.253455	0.000744935	3
Evi5	0.349285	0.000811616	3
Mut	0.349256	0.000821471	3
Kif21a	0.314517	0.00116823	3
Epb41l5	0.367809	0.00121878	3
Nphp1	0.339504	0.00134069	3
Gcc2	0.285501	0.00134182	3
Cc2d2a	0.317304	0.00138331	3
Naga	0.257124	0.00149552	3
Arhgap18	0.304086	0.00159673	3
Ppp3ca	0.313514	0.0017426	3
Ccnd3	0.360354	0.00181676	3
Ddr1	0.425781	0.00223743	3
Dicer1	0.296121	0.00257172	3
Gas8	0.287319	0.00260209	3
Crebrf	0.331775	0.00264666	3
Sqrdl	0.257666	0.00270953	3
Usp19	0.306014	0.00292336	3
Hipk3	0.31706	0.0030139	3
Ephx1	0.390308	0.00373044	3
1810037I17Rik	0.339344	0.00385832	3
C2cd3	0.316654	0.00403034	3
Dtx3	0.28626	0.00451525	3
Lmna	0.29728	0.00474703	3
BC005624	0.316125	0.00484435	3
Ucp2	0.339718	0.00573184	3
Ino80b	0.304741	0.00580671	3
Hist1h2bc	0.355689	0.00586896	3
Ramp1	0.313019	0.00588364	3
Ezr	0.299969	0.00642019	3
Fads6	0.291042	0.00760553	3
Klhdc7a	0.280606	0.00778272	3
Etfa	0.27097	0.00820676	3
Slc39a9	0.283175	0.00864401	3
Cebpa	0.292035	0.00890117	3
Ephx4	0.34839	0.00890793	3
Nt5c2	0.324625	0.010004	3
Mast4	0.317806	0.0102973	3
Zfp703	0.270894	0.0108751	3
Mmp15	0.297083	0.0111563	3
Eif1a	0.341473	0.0118039	3
Mrps6	0.342565	0.0129533	3
Grb7	0.325672	0.0133902	3
Ugt2b35	0.315714	0.013607	3
Uhrf1bp1l	0.254289	0.0137455	3
Tnfaip8	0.342473	0.0137671	3
Gbas	0.260019	0.0140154	3
Odc1	0.347195	0.0150684	3
Mrpl14	0.274328	0.0162059	3
Atp2a2	0.354168	0.0169466	3
Ocln	0.314036	0.0185873	3
Trim7	0.256803	0.0186411	3
Mxd4	0.333818	0.0187627	3
Phactr4	0.310572	0.0209302	3
Flii	0.303988	0.0210987	3
Erdr1	0.274975	0.0217822	3
Furin	0.264987	0.0226953	3
Lmo7	0.267977	0.0230444	3
Ep400	0.264067	0.0272721	3
Mrps17	0.322082	0.0282485	3
Cdpf1	0.277226	0.0297353	3
Aldh3a2	0.260156	0.0300014	3
Msi2	0.271941	0.0301087	3
Ssbp4	0.253639	0.0328162	3
Hpgd	0.332764	0.0332028	3
Tax1bp1	0.26183	0.0403639	3
Ascc1	0.332099	0.0454907	3
Idh3g	0.333062	0.0483932	3
Anxa3	1.56685	2.43e-104	4
Dclk1	0.541356	4.78e-50	4
2200002D01Rik	0.899142	5.4e-50	4
Cxcl16	0.896561	5.11e-42	4
Sftpd	0.646508	4.91e-36	4
Mfge8	1.0682	9.38e-32	4
Flrt2	0.469126	2e-29	4
Tgfb3	0.630137	4.45e-29	4
Igf1	0.63161	1.21e-24	4
Csf1	0.384269	3.96e-24	4
S100a11	0.448197	8.65e-23	4
Myl12a	0.53857	3.83e-21	4
Sema3c	0.650233	1.09e-20	4
S100a10	0.575262	2.54e-19	4
Cd2ap	0.6278	2.56e-19	4
Fxyd3	0.507622	4.1e-19	4
Junb	0.665666	7.27e-19	4
Krt7	0.574015	3.56e-18	4
Shisa4	0.479812	1.94e-17	4
Pglyrp1	1.01611	2.06e-17	4
Jund	0.550302	2.78e-17	4
Ltbp4	0.268743	3.71e-17	4
Igfbp7	0.560539	4.34e-17	4
Scx	0.356244	6.17e-17	4
Pdpn	0.312095	7.16e-17	4
Itga3	0.396415	8.68e-17	4
C3	0.810663	9.19e-17	4
Nfkbia	0.701636	1.2e-16	4
Sh2d4a	0.509661	3.24e-16	4
Tuft1	0.441627	3.74e-16	4
Myl12b	0.514727	7.41e-16	4
Cldn4	0.464162	8.37e-16	4
Hspg2	0.443133	2.66e-15	4
Pdlim4	0.434947	6.91e-15	4
Tsc22d3	0.556118	7.89e-15	4
Birc3	0.332296	6.22e-14	4
Oasl2	0.321239	9.29e-14	4
Ahnak	0.618688	1.48e-13	4
Ezr	0.504031	1.49e-13	4
Slco3a1	0.485235	1.5e-13	4
Ptgfr	0.327706	1.53e-13	4
Anxa2	0.512601	1.79e-13	4
Adam33	0.539694	4.63e-13	4
Ly6e	0.349113	8.05e-13	4
Bcam	0.543701	1.04e-12	4
Cyr61	0.627117	1.34e-12	4
Efemp1	0.386139	1.71e-12	4
Actg1	0.318246	2.58e-12	4
Glipr2	0.31758	1.18e-11	4
Bcl3	0.257154	2.6e-11	4
Klf6	0.479515	2.99e-11	4
Efhd2	0.467906	3.07e-11	4
Pmepa1	0.256677	1.61e-10	4
Relb	0.404309	1.75e-10	4
Pah	0.349571	3.33e-10	4
Cttnbp2	0.319695	5.09e-10	4
Samd9l	0.44173	9.11e-10	4
H2-D1	0.462677	1.08e-09	4
Klf5	0.397267	1.35e-09	4
H2-T23	0.307122	3.03e-09	4
Timp3	0.559552	3.58e-09	4
Cdc42ep5	0.324625	4.21e-09	4
Krt19	0.569782	6.15e-09	4
Vat1	0.272487	7.35e-09	4
Camk2n1	0.387233	1.36e-08	4
Nfkb2	0.276549	1.83e-08	4
Cd47	0.494497	2.13e-08	4
Bst2	0.540086	2.88e-08	4
Syt7	0.268882	2.97e-08	4
Rassf3	0.409833	3.37e-08	4
B2m	0.495871	3.67e-08	4
F11r	0.417303	4.14e-08	4
Crim1	0.309806	1.35e-07	4
S100a6	1.55416	1.49e-07	4
Aldh1a1	0.340714	2.74e-07	4
Tmem176b	0.326445	4.19e-07	4
Samd4	0.256572	4.22e-07	4
Cd14	0.390851	5.21e-07	4
Comt	0.384686	6.61e-07	4
Sec14l1	0.25068	7.95e-07	4
Plec	0.285445	8.22e-07	4
Tspan15	0.251344	1.16e-06	4
Il6st	0.322397	1.34e-06	4
Dsg2	0.295068	1.61e-06	4
Sfn	0.380595	3.51e-06	4
Chmp2b	0.386199	7.24e-06	4
Wls	0.298192	8.36e-06	4
Apobec3	0.39802	1.09e-05	4
Plscr1	0.296387	1.12e-05	4
Tpm1	0.365207	1.21e-05	4
Hspb1	0.433874	1.27e-05	4
H2-Q4	0.328901	1.44e-05	4
Myadm	0.332224	1.5e-05	4
Serinc2	0.267633	3.43e-05	4
Tapbp	0.286266	4.58e-05	4
Cebpb	0.260962	4.89e-05	4
Ly6a	0.406657	5.12e-05	4
Rnf213	0.268147	7.33e-05	4
Dstn	0.273626	7.51e-05	4
Wasf2	0.299872	7.89e-05	4
Slc6a6	0.270881	0.000103686	4
Mlph	0.304756	0.000110119	4
Rtp4	0.303234	0.000122397	4
Birc2	0.285184	0.000122955	4
Ifngr1	0.300899	0.000139794	4
Ankrd1	0.666864	0.000140357	4
Ndrg1	0.255336	0.00016031	4
Pdlim1	0.275587	0.000174343	4
Sirpa	0.281992	0.000181354	4
Sdc4	0.380641	0.000221851	4
Ifi27	0.355001	0.000234493	4
Ptp4a1	0.338483	0.000364588	4
Cp	0.260099	0.000396639	4
Gadd45b	0.301263	0.000494996	4
Csrp2	0.293259	0.000609714	4
Shroom3	0.270244	0.000632375	4
Sppl2a	0.315664	0.000722998	4
Cd44	0.52485	0.000854913	4
Tacc2	0.286586	0.000958042	4
Cryab	0.289894	0.00108515	4
Sh3d19	0.261677	0.00115842	4
Ifrd1	0.260929	0.00127055	4
Edn1	0.305866	0.00131512	4
Muc1	0.391	0.00146683	4
Fstl1	0.345137	0.00153198	4
Hsp90aa1	0.273659	0.00161145	4
Ddah2	0.350149	0.00177229	4
Btg2	0.344237	0.00258411	4
Pdzk1ip1	0.292489	0.00294915	4
Wfdc2	0.396773	0.0031628	4
Ywhah	0.279727	0.00422749	4
Cldn7	0.25285	0.00456879	4
Ctnna1	0.283355	0.00466495	4
F3	0.266888	0.00501604	4
Gpm6b	0.253581	0.00546063	4
Isg15	0.538997	0.00596539	4
Zfp36l1	0.31437	0.00647573	4
Rhoc	0.271003	0.00980297	4
Ltb	0.304974	0.0119576	4
Fam107b	0.28995	0.0174883	4
2020-09-07	0.25041	0.0187782	4
Timp2	0.26253	0.0193221	4
Lmna	0.258695	0.0240874	4
Elf1	0.258495	0.0297929	4
Adss	0.281027	0.0386914	4
Krt18	0.272946	0.0393245	4
Sparc	0.305567	0.0396852	4
Myh9	0.256371	0.0397209	4
Cenpf	1.33491	4.22e-89	5
Cenpe	0.773278	1.8e-71	5
Ccnb2	0.936969	2.54e-50	5
Mki67	0.975691	3.09e-31	5
Cdca3	0.474097	1.28e-27	5
Lockd	1.51194	1.4e-24	5
Mcam	0.458966	1.66e-17	5
H1fx	0.434067	4.12e-15	5
Cox6b2	0.758995	9.34e-12	5
Stmn1	1.50664	1.54e-09	5
Gm13056	0.368197	1.07e-08	5
Dnali1	0.564131	1.35e-08	5
Atf5	1.04745	3.34e-07	5
Nptxr	0.435247	2.72e-06	5
Ccdc114	0.429122	5.73e-05	5
Lrriq1	0.455997	0.000440704	5
Lgals1	0.729975	0.000684625	5
Hsp90b1	0.875009	0.00107375	5
Dnajb13	0.432149	0.00618955	5
Adcy6	0.433951	0.00703532	5
Hmgn2	0.761337	0.00991854	5
Rpgr	0.43879	0.0121114	5
Cdkn1a	0.79477	0.0311283	5
Bax	0.74516	0.0325183	5
Rpl41	0.311265	0.0329757	5
