# Supplementary material for: Single-cell transcriptome analysis defines heterogeneity of the murine pancreatic ductal tree
Source: eLife. 2021 May 19;10:e67776. doi: 10.7554/eLife.67776 (PMC8184217; doi:10.7554/eLife.67776)
Supplement: Figure 2—source data 2. [file elife-67776-fig2-data2.xls]

## Sheet: DBA+ duct cluster 0 vs all
© 2000-2020 QIAGEN. All rights reserved.
Ingenuity Canonical Pathways	-log(p-value)	Ratio	z-score	Molecules
VDR/RXR Activation	3.12	0.0385	#NUM!	HES1,SPP1,TGFB2
Hepatic Fibrosis Signaling Pathway	2.82	0.0136	2.236	CCND1,RHOJ,RHOV,SPP1,TGFB2
Glycolysis I	2.79	0.0769	#NUM!	ALDOC,ENO1
Gluconeogenesis I	2.79	0.0769	#NUM!	ALDOC,ENO1
Colorectal Cancer Metastasis Signaling	2.57	0.0158	#NUM!	CCND1,RHOJ,RHOV,TGFB2
Cysteine Biosynthesis/Homocysteine Degradation	2.34	0.5	#NUM!	CBS/CBSL
HMGB1 Signaling	2.19	0.0182	#NUM!	RHOJ,RHOV,TGFB2
Glioblastoma Multiforme Signaling	2.19	0.0182	#NUM!	CCND1,RHOJ,RHOV
Germ Cell-Sertoli Cell Junction Signaling	2.15	0.0175	#NUM!	RHOJ,RHOV,TGFB2
Semaphorin Signaling in Neurons	2.08	0.0333	#NUM!	RHOJ,RHOV
Arginine Degradation I (Arginase Pathway)	2.04	0.25	#NUM!	OAT
Production of Nitric Oxide and Reactive Oxygen Species in Macrophages	2.04	0.016	#NUM!	APOE,RHOJ,RHOV
ILK Signaling	2.03	0.0158	#NUM!	CCND1,RHOJ,RHOV
Cell Cycle: G1/S Checkpoint Regulation	1.99	0.0299	#NUM!	CCND1,TGFB2
IL-8 Signaling	1.97	0.015	#NUM!	CCND1,RHOJ,RHOV
Proline Biosynthesis II (from Arginine)	1.94	0.2	#NUM!	OAT
Actin Nucleation by ARP-WASP Complex	1.93	0.0278	#NUM!	RHOJ,RHOV
Molecular Mechanisms of Cancer	1.91	0.0102	#NUM!	CCND1,RHOJ,RHOV,TGFB2
Glioma Invasiveness Signaling	1.9	0.027	#NUM!	RHOJ,RHOV
Arginine Biosynthesis IV	1.87	0.167	#NUM!	OAT
Arginine Degradation VI (Arginase 2 Pathway)	1.87	0.167	#NUM!	OAT
BEX2 Signaling Pathway	1.85	0.0253	#NUM!	CCND1,SPP1
LPS/IL-1 Mediated Inhibition of RXR Function	1.84	0.0134	#NUM!	APOE,FMO1,HS6ST2
Cyclins and Cell Cycle Regulation	1.83	0.0247	#NUM!	CCND1,TGFB2
Cardiac Hypertrophy Signaling	1.75	0.0125	#NUM!	RHOJ,RHOV,TGFB2
Regulation of Actin-based Motility by Rho	1.71	0.0213	#NUM!	RHOJ,RHOV
Sucrose Degradation V (Mammalian)	1.69	0.111	#NUM!	ALDOC
Citrulline Biosynthesis	1.69	0.111	#NUM!	OAT
Phospholipase C Signaling	1.68	0.0117	#NUM!	PEBP1,RHOJ,RHOV
Prostanoid Biosynthesis	1.65	0.1	#NUM!	PTGDS
Chronic Myeloid Leukemia Signaling	1.63	0.0194	#NUM!	CCND1,TGFB2
Mouse Embryonic Stem Cell Pluripotency	1.63	0.0194	#NUM!	ID2,LIFR
Sumoylation Pathway	1.63	0.0194	#NUM!	RHOJ,RHOV
Axonal Guidance Signaling	1.61	0.00826	#NUM!	ADAMTS1,ADAMTS9,MME,RTN4
Pancreatic Adenocarcinoma Signaling	1.59	0.0183	#NUM!	CCND1,TGFB2
Oleate Biosynthesis II (Animals)	1.53	0.0769	#NUM!	Scd2
Sphingosine-1-phosphate Signaling	1.53	0.0171	#NUM!	RHOJ,RHOV
Airway Pathology in Chronic Obstructive Pulmonary Disease	1.52	0.0169	#NUM!	PTGDS,TGFB2
Cholecystokinin/Gastrin-mediated Signaling	1.52	0.0168	#NUM!	RHOJ,RHOV
Phagosome Formation	1.48	0.016	#NUM!	RHOJ,RHOV
Superpathway of Citrulline Metabolism	1.47	0.0667	#NUM!	OAT
IL-12 Signaling and Production in Macrophages	1.44	0.0152	#NUM!	APOE,TGFB2
Aryl Hydrocarbon Receptor Signaling	1.37	0.014	#NUM!	CCND1,TGFB2
GADD45 Signaling	1.37	0.0526	#NUM!	CCND1
Factors Promoting Cardiogenesis in Vertebrates	1.33	0.0133	#NUM!	CCND1,TGFB2
Gαq Signaling	1.29	0.0127	#NUM!	RHOJ,RHOV
Apelin Cardiac Fibroblast Signaling Pathway	1.29	0.0435	#NUM!	TGFB2
Glutathione Redox Reactions I	1.27	0.0417	#NUM!	GPX2
Cysteine Biosynthesis III (mammalia)	1.27	0.0417	#NUM!	CBS/CBSL
Tec Kinase Signaling	1.27	0.0122	#NUM!	RHOJ,RHOV
CXCR4 Signaling	1.25	0.012	#NUM!	RHOJ,RHOV
Tight Junction Signaling	1.25	0.0119	#NUM!	CLDN10,TGFB2
Estrogen-mediated S-phase Entry	1.24	0.0385	#NUM!	CCND1
Wnt/β-catenin Signaling	1.22	0.0116	#NUM!	CCND1,TGFB2
RhoGDI Signaling	1.19	0.0111	#NUM!	RHOJ,RHOV
Regulation Of The Epithelial Mesenchymal Transition By Growth Factors Pathway	1.16	0.0106	#NUM!	ID2,TGFB2
NRF2-mediated Oxidative Stress Response	1.16	0.0106	#NUM!	FMO1,GPX2
Xenobiotic Metabolism CAR Signaling Pathway	1.16	0.0106	#NUM!	FMO1,HS6ST2
Regulation of the Epithelial-Mesenchymal Transition Pathway	1.15	0.0104	#NUM!	ID2,TGFB2
Cell Cycle Regulation by BTG Family Proteins	1.09	0.027	#NUM!	CCND1
Superpathway of Methionine Degradation	1.09	0.027	#NUM!	CBS/CBSL
Notch Signaling	1.09	0.027	#NUM!	HES1
Thrombin Signaling	1.09	0.00962	#NUM!	RHOJ,RHOV
mTOR Signaling	1.08	0.00952	#NUM!	RHOJ,RHOV
Osteoarthritis Pathway	1.08	0.00948	#NUM!	HES1,SPP1
Integrin Signaling	1.07	0.00939	#NUM!	RHOJ,RHOV
Antiproliferative Role of TOB in T Cell Signaling	1.07	0.0256	#NUM!	TGFB2
AMPK Signaling	1.06	0.00935	#NUM!	CCND1,CFTR
Triacylglycerol Biosynthesis	1.04	0.0238	#NUM!	LIPT2
Role of Oct4 in Mammalian Embryonic Stem Cell Pluripotency	1	0.0217	#NUM!	SPP1
Dermatan Sulfate Biosynthesis (Late Stages)	1	0.0217	#NUM!	HS6ST2
FAT10 Cancer Signaling Pathway	1	0.0217	#NUM!	TGFB2
PFKFB4 Signaling Pathway	1	0.0217	#NUM!	TGFB2
Chondroitin Sulfate Biosynthesis (Late Stages)	0.983	0.0208	#NUM!	HS6ST2
Stearate Biosynthesis I (Animals)	0.983	0.0208	#NUM!	LIPT2
Signaling by Rho Family GTPases	0.971	0.0082	#NUM!	RHOJ,RHOV
Melanoma Signaling	0.967	0.02	#NUM!	CCND1
Chondroitin Sulfate Biosynthesis	0.921	0.0179	#NUM!	HS6ST2
CNTF Signaling	0.914	0.0175	#NUM!	LIFR
Maturity Onset Diabetes of Young (MODY) Signaling	0.896	0.0169	#NUM!	APOE
Dermatan Sulfate Biosynthesis	0.896	0.0169	#NUM!	HS6ST2
Endometrial Cancer Signaling	0.889	0.0167	#NUM!	CCND1
Systemic Lupus Erythematosus In B Cell Signaling Pathway	0.883	0.00727	#NUM!	CCND1,TGFB2
Senescence Pathway	0.883	0.00727	#NUM!	CCND1,TGFB2
ErbB2-ErbB3 Signaling	0.86	0.0154	#NUM!	CCND1
Nicotine Degradation II	0.86	0.0154	#NUM!	FMO1
Regulation of Cellular Mechanics by Calpain Protease	0.86	0.0154	#NUM!	CCND1
Xenobiotic Metabolism Signaling	0.854	0.00697	#NUM!	FMO1,HS6ST2
Eicosanoid Signaling	0.854	0.0152	#NUM!	PTGDS
GM-CSF Signaling	0.83	0.0143	#NUM!	CCND1
Neuroinflammation Signaling Pathway	0.827	0.00669	#NUM!	CRP,TGFB2
Small Cell Lung Cancer Signaling	0.824	0.0141	#NUM!	CCND1
Heparan Sulfate Biosynthesis (Late Stages)	0.824	0.0141	#NUM!	HS6ST2
Non-Small Cell Lung Cancer Signaling	0.812	0.0137	#NUM!	CCND1
Estrogen-Dependent Breast Cancer Signaling	0.807	0.0135	#NUM!	CCND1
Heparan Sulfate Biosynthesis	0.785	0.0128	#NUM!	HS6ST2
IL-7 Signaling Pathway	0.785	0.0128	#NUM!	CCND1
Thyroid Cancer Signaling	0.78	0.0127	#NUM!	CCND1
IL-17 Signaling	0.775	0.0125	#NUM!	CRP
Apelin Adipocyte Signaling Pathway	0.767	0.0122	#NUM!	GPX2
Estrogen Receptor Signaling	0.762	0.0061	#NUM!	CCND1,HES1
TR/RXR Activation	0.757	0.0119	#NUM!	ENO1
HER-2 Signaling in Breast Cancer	0.757	0.0119	#NUM!	CCND1
Systemic Lupus Erythematosus In T Cell Signaling Pathway	0.75	0.00599	#NUM!	RHOJ,RHOV
Acute Myeloid Leukemia Signaling	0.733	0.0112	#NUM!	CCND1
Regulation of IL-2 Expression in Activated and Anergic T Lymphocytes	0.733	0.0112	#NUM!	TGFB2
Altered T Cell and B Cell Signaling in Rheumatoid Arthritis	0.728	0.0111	#NUM!	SPP1
Prostate Cancer Signaling	0.726	0.011	#NUM!	CCND1
TGF-β Signaling	0.703	0.0104	#NUM!	TGFB2
Bladder Cancer Signaling	0.699	0.0103	#NUM!	CCND1
p53 Signaling	0.697	0.0102	#NUM!	CCND1
PD-1, PD-L1 cancer immunotherapy pathway	0.666	0.00943	#NUM!	TGFB2
Glioma Signaling	0.652	0.00909	#NUM!	CCND1
HGF Signaling	0.648	0.00901	#NUM!	CCND1
Endocannabinoid Developing Neuron Pathway	0.635	0.0087	#NUM!	CCND1
Neuroprotective Role of THOP1 in Alzheimer's Disease	0.631	0.00862	#NUM!	MME
p38 MAPK Signaling	0.625	0.00847	#NUM!	TGFB2
Role of NANOG in Mammalian Embryonic Stem Cell Pluripotency	0.622	0.0084	#NUM!	LIFR
LXR/RXR Activation	0.614	0.00826	#NUM!	APOE
IL-6 Signaling	0.604	0.008	#NUM!	CRP
FXR/RXR Activation	0.6	0.00794	#NUM!	APOE
PTEN Signaling	0.6	0.00794	#NUM!	CCND1
Atherosclerosis Signaling	0.597	0.00787	#NUM!	APOE
Reelin Signaling in Neurons	0.592	0.00775	#NUM!	APOE
Human Embryonic Stem Cell Pluripotency	0.573	0.00741	#NUM!	TGFB2
STAT3 Pathway	0.573	0.00741	#NUM!	TGFB2
Androgen Signaling	0.572	0.00735	#NUM!	CCND1
Ovarian Cancer Signaling	0.564	0.00719	#NUM!	CCND1
Hereditary Breast Cancer Signaling	0.561	0.00714	#NUM!	CCND1
Endocannabinoid Cancer Inhibition Pathway	0.553	0.00699	#NUM!	CCND1
Coronavirus Pathogenesis Pathway	0.536	0.00667	#NUM!	CCND1
Epithelial Adherens Junction Signaling	0.53	0.00658	#NUM!	TGFB2
Role of Pattern Recognition Receptors in Recognition of Bacteria and Viruses	0.526	0.00649	#NUM!	TGFB2
HOTAIR Regulatory Pathway	0.511	0.00625	#NUM!	SPP1
PI3K/AKT Signaling	0.48	0.00571	#NUM!	CCND1
Acute Phase Response Signaling	0.472	0.00559	#NUM!	CRP
Granulocyte Adhesion and Diapedesis	0.47	0.00556	#NUM!	CLDN10
Hepatic Cholestasis	0.461	0.00541	#NUM!	TGFB2
Sertoli Cell-Sertoli Cell Junction Signaling	0.461	0.00541	#NUM!	CLDN10
Hepatic Fibrosis / Hepatic Stellate Cell Activation	0.458	0.00538	#NUM!	TGFB2
PPARα/RXRα Activation	0.451	0.00526	#NUM!	TGFB2
Xenobiotic Metabolism PXR Signaling Pathway	0.447	0.00521	#NUM!	HS6ST2
Clathrin-mediated Endocytosis Signaling	0.446	0.00518	#NUM!	APOE
Agranulocyte Adhesion and Diapedesis	0.446	0.00518	#NUM!	CLDN10
RAR Activation	0.444	0.00515	#NUM!	TGFB2
Leukocyte Extravasation Signaling	0.439	0.00508	#NUM!	CLDN10
HIF1α Signaling	0.425	0.00488	#NUM!	TGFB2
Role of NFAT in Cardiac Hypertrophy	0.41	0.00467	#NUM!	TGFB2
Breast Cancer Regulation by Stathmin1	0.406	0.00338	#NUM!	CCND1,TGFB2
Role of Osteoblasts, Osteoclasts and Chondrocytes in Rheumatoid Arthritis	0.401	0.00455	#NUM!	SPP1
EIF2 Signaling	0.395	0.00446	#NUM!	CCND1
Role of Macrophages, Fibroblasts and Endothelial Cells in Rheumatoid Arthritis	0.29	0.00321	#NUM!	CCND1
Synaptogenesis Signaling Pathway	0.29	0.00321	#NUM!	APOE
Glucocorticoid Receptor Signaling	0.268	0.00298	#NUM!	TGFB2
Protein Kinase A Signaling	0.22	0.00251	#NUM!	TGFB2
Cardiac Hypertrophy Signaling (Enhanced)	0	0.00205	#NUM!	TGFB2

## Sheet: DBA+ duct cluster 1 vs all
© 2000-2020 QIAGEN. All rights reserved.
Ingenuity Canonical Pathways	-log(p-value)	Ratio	z-score	Molecules
LPS/IL-1 Mediated Inhibition of RXR Function	2.5	0.0134	#NUM!	ALDH1A1,CD14,FMO2
Tyrosine Biosynthesis IV	2.4	0.333	#NUM!	PAH
Phenylalanine Degradation I (Aerobic)	2.28	0.25	#NUM!	PAH
IGF-1 Signaling	2.08	0.0192	#NUM!	IGF1,IGFBP7
Calcium Transport I	1.88	0.1	#NUM!	ANXA5
Histamine Degradation	1.65	0.0588	#NUM!	ALDH1A1
Oxidative Ethanol Degradation III	1.61	0.0526	#NUM!	ALDH1A1
Hepatic Fibrosis / Hepatic Stellate Cell Activation	1.6	0.0108	#NUM!	CD14,IGF1
Axonal Guidance Signaling	1.6	0.0062	#NUM!	ADAM33,IGF1,SEMA3C
Xenobiotic Metabolism CAR Signaling Pathway	1.59	0.0106	#NUM!	ALDH1A1,FMO2
Fatty Acid α-oxidation	1.58	0.05	#NUM!	ALDH1A1
RAR Activation	1.57	0.0103	#NUM!	ALDH1A1,PNRC1
Putrescine Degradation III	1.56	0.0476	#NUM!	ALDH1A1
Ethanol Degradation IV	1.52	0.0435	#NUM!	ALDH1A1
Osteoarthritis Pathway	1.5	0.00948	#NUM!	ANXA5,TIMP3
Tryptophan Degradation X (Mammalian, via Tryptamine)	1.49	0.04	#NUM!	ALDH1A1
Dopamine Degradation	1.41	0.0333	#NUM!	ALDH1A1
Ethanol Degradation II	1.38	0.0312	#NUM!	ALDH1A1
MIF-mediated Glucocorticoid Regulation	1.36	0.0294	#NUM!	CD14
Retinoate Biosynthesis I	1.36	0.0294	#NUM!	ALDH1A1
Noradrenaline and Adrenaline Degradation	1.34	0.0286	#NUM!	ALDH1A1
Inhibition of Matrix Metalloproteases	1.3	0.0256	#NUM!	TIMP3
MIF Regulation of Innate Immunity	1.27	0.0238	#NUM!	CD14
Role of IL-17F in Allergic Inflammatory Airway Diseases	1.27	0.0238	#NUM!	IGF1
Xenobiotic Metabolism Signaling	1.26	0.00697	#NUM!	ALDH1A1,FMO2
Oncostatin M Signaling	1.26	0.0233	#NUM!	TIMP3
iNOS Signaling	1.24	0.0222	#NUM!	CD14
PXR/RXR Activation	1.08	0.0154	#NUM!	ALDH1A1
Nicotine Degradation II	1.08	0.0154	#NUM!	FMO2
Serotonin Degradation	1.07	0.0149	#NUM!	ALDH1A1
IL-10 Signaling	1.06	0.0145	#NUM!	CD14
Growth Hormone Signaling	1.05	0.0141	#NUM!	IGF1
Estrogen-Dependent Breast Cancer Signaling	1.03	0.0135	#NUM!	IGF1
Glioma Invasiveness Signaling	1.03	0.0135	#NUM!	TIMP3
Toll-like Receptor Signaling	1.02	0.0132	#NUM!	CD14
Macropinocytosis Signaling	1.02	0.0132	#NUM!	CD14
Dopamine Receptor Signaling	1.01	0.013	#NUM!	PPP1R1B
VDR/RXR Activation	1.01	0.0128	#NUM!	CD14
Thyroid Cancer Signaling	1	0.0127	#NUM!	IGF1
LPS-stimulated MAPK Signaling	0.987	0.0122	#NUM!	CD14
Xenobiotic Metabolism AHR Signaling Pathway	0.975	0.0118	#NUM!	ALDH1A1
FAK Signaling	0.928	0.0105	#NUM!	TNS1
Amyotrophic Lateral Sclerosis Signaling	0.921	0.0103	#NUM!	IGF1
CDK5 Signaling	0.876	0.00926	#NUM!	PPP1R1B
Glioma Signaling	0.87	0.00909	#NUM!	IGF1
LXR/RXR Activation	0.83	0.00826	#NUM!	CD14
RhoA Signaling	0.824	0.00813	#NUM!	IGF1
IL-6 Signaling	0.815	0.008	#NUM!	CD14
STAT3 Pathway	0.785	0.00741	#NUM!	IGF1
Iron homeostasis signaling pathway	0.78	0.0073	#NUM!	CP
D-myo-inositol (1,4,5,6)-Tetrakisphosphate Biosynthesis	0.767	0.00704	#NUM!	PPP1R1B
D-myo-inositol (3,4,5,6)-tetrakisphosphate Biosynthesis	0.767	0.00704	#NUM!	PPP1R1B
Aryl Hydrocarbon Receptor Signaling	0.762	0.00699	#NUM!	ALDH1A1
3-phosphoinositide Degradation	0.728	0.00641	#NUM!	PPP1R1B
D-myo-inositol-5-phosphate Metabolism	0.726	0.00637	#NUM!	PPP1R1B
Dopamine-DARPP32 Feedback in cAMP Signaling	0.712	0.00613	#NUM!	PPP1R1B
Glioblastoma Multiforme Signaling	0.708	0.00606	#NUM!	IGF1
3-phosphoinositide Biosynthesis	0.706	0.00602	#NUM!	PPP1R1B
Acute Phase Response Signaling	0.676	0.00559	#NUM!	CP
Hepatic Cholestasis	0.664	0.00541	#NUM!	CD14
Synaptic Long Term Depression	0.654	0.00529	#NUM!	IGF1
Xenobiotic Metabolism PXR Signaling Pathway	0.648	0.00521	#NUM!	ALDH1A1
Clathrin-mediated Endocytosis Signaling	0.646	0.00518	#NUM!	IGF1
Leukocyte Extravasation Signaling	0.638	0.00508	#NUM!	TIMP3
Superpathway of Inositol Phosphate Compounds	0.635	0.00503	#NUM!	PPP1R1B
HIF1α Signaling	0.623	0.00488	#NUM!	IGF1
Role of NFAT in Cardiac Hypertrophy	0.607	0.00467	#NUM!	IGF1
Actin Cytoskeleton Signaling	0.6	0.00459	#NUM!	CD14
Role of Osteoblasts, Osteoclasts and Chondrocytes in Rheumatoid Arthritis	0.597	0.00455	#NUM!	IGF1
Huntington's Disease Signaling	0.569	0.00422	#NUM!	IGF1
Cardiac Hypertrophy Signaling	0.564	0.00417	#NUM!	IGF1
Estrogen Receptor Signaling	0.451	0.00305	#NUM!	IGF1
Glucocorticoid Receptor Signaling	0.444	0.00298	#NUM!	TSC22D3
Protein Kinase A Signaling	0.385	0.00251	#NUM!	PPP1R1B
Cardiac Hypertrophy Signaling (Enhanced)	0.321	0.00205	#NUM!	IGF1
Breast Cancer Regulation by Stathmin1	0.263	0.00169	#NUM!	IGF1

## Sheet: DBA+ cluster 2 vs all
© 2000-2020 QIAGEN. All rights reserved.
Ingenuity Canonical Pathways	-log(p-value)	Ratio	z-score	Molecules
VDR/RXR Activation	3.2	0.0256	#NUM!	HES1,SPP1
BEX2 Signaling Pathway	3.19	0.0253	#NUM!	CCND1,SPP1
Cysteine Biosynthesis/Homocysteine Degradation	3.01	0.5	#NUM!	CBS/CBSL
Arginine Degradation I (Arginase Pathway)	2.71	0.25	#NUM!	OAT
Arginine Biosynthesis IV	2.54	0.167	#NUM!	OAT
Proline Biosynthesis II (from Arginine)	2.54	0.167	#NUM!	OAT
Arginine Degradation VI (Arginase 2 Pathway)	2.54	0.167	#NUM!	OAT
Sucrose Degradation V (Mammalian)	2.36	0.111	#NUM!	ALDOC
Citrulline Biosynthesis	2.36	0.111	#NUM!	OAT
Osteoarthritis Pathway	2.35	0.00948	#NUM!	HES1,SPP1
Superpathway of Citrulline Metabolism	2.14	0.0667	#NUM!	OAT
GADD45 Signaling	2.04	0.0526	#NUM!	CCND1
Estrogen Receptor Signaling	1.98	0.0061	#NUM!	CCND1,HES1
Cysteine Biosynthesis III (mammalia)	1.94	0.0417	#NUM!	CBS/CBSL
Estrogen-mediated S-phase Entry	1.9	0.0385	#NUM!	CCND1
Glycolysis I	1.9	0.0385	#NUM!	ALDOC
Gluconeogenesis I	1.9	0.0385	#NUM!	ALDOC
Hepatic Fibrosis Signaling Pathway	1.88	0.00543	#NUM!	CCND1,SPP1
Dopamine Degradation	1.84	0.0333	#NUM!	Sult1a1
Cell Cycle Regulation by BTG Family Proteins	1.75	0.027	#NUM!	CCND1
Superpathway of Methionine Degradation	1.75	0.027	#NUM!	CBS/CBSL
Notch Signaling	1.75	0.027	#NUM!	HES1
Thyroid Hormone Metabolism II (via Conjugation and/or Degradation)	1.74	0.0263	#NUM!	Sult1a1
Role of Oct4 in Mammalian Embryonic Stem Cell Pluripotency	1.66	0.0217	#NUM!	SPP1
Melanoma Signaling	1.62	0.02	#NUM!	CCND1
Endometrial Cancer Signaling	1.54	0.0167	#NUM!	CCND1
Melatonin Degradation I	1.54	0.0167	#NUM!	Sult1a1
ErbB2-ErbB3 Signaling	1.51	0.0154	#NUM!	CCND1
Superpathway of Melatonin Degradation	1.51	0.0154	#NUM!	Sult1a1
Regulation of Cellular Mechanics by Calpain Protease	1.51	0.0154	#NUM!	CCND1
Serotonin Degradation	1.49	0.0149	#NUM!	Sult1a1
Cell Cycle: G1/S Checkpoint Regulation	1.49	0.0149	#NUM!	CCND1
GM-CSF Signaling	1.48	0.0143	#NUM!	CCND1
Small Cell Lung Cancer Signaling	1.47	0.0141	#NUM!	CCND1
Non-Small Cell Lung Cancer Signaling	1.46	0.0137	#NUM!	CCND1
Estrogen-Dependent Breast Cancer Signaling	1.45	0.0135	#NUM!	CCND1
IL-7 Signaling Pathway	1.43	0.0128	#NUM!	CCND1
Thyroid Cancer Signaling	1.42	0.0127	#NUM!	CCND1
Cyclins and Cell Cycle Regulation	1.41	0.0123	#NUM!	CCND1
HER-2 Signaling in Breast Cancer	1.4	0.0119	#NUM!	CCND1
Acute Myeloid Leukemia Signaling	1.37	0.0112	#NUM!	CCND1
Altered T Cell and B Cell Signaling in Rheumatoid Arthritis	1.37	0.0111	#NUM!	SPP1
Prostate Cancer Signaling	1.36	0.011	#NUM!	CCND1
Bladder Cancer Signaling	1.34	0.0103	#NUM!	CCND1
p53 Signaling	1.33	0.0102	#NUM!	CCND1
Chronic Myeloid Leukemia Signaling	1.31	0.00971	#NUM!	CCND1
Pancreatic Adenocarcinoma Signaling	1.29	0.00917	#NUM!	CCND1
Glioma Signaling	1.28	0.00909	#NUM!	CCND1
HGF Signaling	1.28	0.00901	#NUM!	CCND1
Endocannabinoid Developing Neuron Pathway	1.27	0.0087	#NUM!	CCND1
LXR/RXR Activation	1.24	0.00826	#NUM!	APOE
FXR/RXR Activation	1.23	0.00794	#NUM!	APOE
Atherosclerosis Signaling	1.23	0.00794	#NUM!	APOE
PTEN Signaling	1.23	0.00794	#NUM!	CCND1
Reelin Signaling in Neurons	1.22	0.00775	#NUM!	APOE
IL-12 Signaling and Production in Macrophages	1.21	0.00758	#NUM!	APOE
Androgen Signaling	1.19	0.00735	#NUM!	CCND1
Ovarian Cancer Signaling	1.19	0.00719	#NUM!	CCND1
Hereditary Breast Cancer Signaling	1.18	0.00714	#NUM!	CCND1
Aryl Hydrocarbon Receptor Signaling	1.17	0.00699	#NUM!	CCND1
Endocannabinoid Cancer Inhibition Pathway	1.17	0.00699	#NUM!	CCND1
Factors Promoting Cardiogenesis in Vertebrates	1.15	0.00667	#NUM!	CCND1
HOTAIR Regulatory Pathway	1.13	0.00625	#NUM!	SPP1
Glioblastoma Multiforme Signaling	1.11	0.00606	#NUM!	CCND1
Wnt/β-catenin Signaling	1.09	0.00578	#NUM!	CCND1
PI3K/AKT Signaling	1.09	0.00571	#NUM!	CCND1
Production of Nitric Oxide and Reactive Oxygen Species in Macrophages	1.06	0.00532	#NUM!	APOE
ILK Signaling	1.05	0.00526	#NUM!	CCND1
Clathrin-mediated Endocytosis Signaling	1.05	0.00518	#NUM!	APOE
IL-8 Signaling	1.03	0.005	#NUM!	CCND1
AMPK Signaling	1	0.00467	#NUM!	CCND1
Role of Osteoblasts, Osteoclasts and Chondrocytes in Rheumatoid Arthritis	0.991	0.00455	#NUM!	SPP1
LPS/IL-1 Mediated Inhibition of RXR Function	0.987	0.00446	#NUM!	APOE
EIF2 Signaling	0.987	0.00446	#NUM!	CCND1
Colorectal Cancer Metastasis Signaling	0.936	0.00395	#NUM!	CCND1
Systemic Lupus Erythematosus In B Cell Signaling Pathway	0.903	0.00364	#NUM!	CCND1
Senescence Pathway	0.903	0.00364	#NUM!	CCND1
Role of Macrophages, Fibroblasts and Endothelial Cells in Rheumatoid Arthritis	0.851	0.00321	#NUM!	CCND1
Synaptogenesis Signaling Pathway	0.851	0.00321	#NUM!	APOE
Molecular Mechanisms of Cancer	0.759	0.00256	#NUM!	CCND1
Axonal Guidance Signaling	0.676	0.00207	#NUM!	ADAMTS1
Breast Cancer Regulation by Stathmin1	0.599	0.00169	#NUM!	CCND1

## Sheet: DBA+ cluster 3 vs all
© 2000-2020 QIAGEN. All rights reserved.
Ingenuity Canonical Pathways	-log(p-value)	Ratio	z-score	Molecules
Aryl Hydrocarbon Receptor Signaling	6.47	0.0979	-0.333	ALDH3A2,ALDH3B1,BAX,CCND2,CCND3,CDKN1A,FOS,GSTM5,GSTO1,GSTZ1,HSP90AA1,MDM2,PTGES3,RARA
Xenobiotic Metabolism AHR Signaling Pathway	3.06	0.0824	1.89	ALDH3A2,ALDH3B1,GSTM5,GSTO1,GSTZ1,HSP90AA1,PTGES3
p53 Signaling	2.69	0.0714	1	BAX,CCND2,CCNG1,CDKN1A,MDM2,TP53BP2,TP53INP1
GADD45 Signaling	2.34	0.158	#NUM!	CCND2,CCND3,CDKN1A
Pyridoxal 5'-phosphate Salvage Pathway	2.17	0.0758	2.236	DAPK1,HIPK1,MAK,PDXK,PRPF4B
BAG2 Signaling Pathway	2.13	0.093	1	CDKN1A,HSP90AA1,HSPA2,MDM2
NRF2-mediated Oxidative Stress Response	2.12	0.0476	1.342	DNAJB13,EPHX1,FOS,GCLC,GSTM5,GSTO1,GSTZ1,PRKCZ,TXN
FXR/RXR Activation	2.09	0.0556	#NUM!	ALB,AMBP,FOXA2,HNF4A,RARA,TF,TTR
Prostanoid Biosynthesis	1.88	0.2	#NUM!	CYP2S1,PTGES3
Glutathione-mediated Detoxification	1.71	0.0938	#NUM!	GSTM5,GSTO1,GSTZ1
Phagosome Maturation	1.69	0.0464	#NUM!	CTSH,DYNC2H1,DYNLL1,DYNLRB2,PRDX5,TUBA1A,TUBB4B
Xenobiotic Metabolism CAR Signaling Pathway	1.66	0.0423	2.121	ALDH3A2,ALDH3B1,GSTM5,GSTO1,GSTZ1,HSP90AA1,PRKCZ,UGT2B7
Regulation of IL-2 Expression in Activated and Anergic T Lymphocytes	1.64	0.0562	#NUM!	Calm1 (includes others),CHUK,FOS,PPP3CA,TOB1
Xenobiotic Metabolism PXR Signaling Pathway	1.62	0.0417	1.414	ALDH3A2,ALDH3B1,GSTM5,GSTO1,GSTZ1,HSP90AA1,PRKCZ,UGT2B7
Leukocyte Extravasation Signaling	1.56	0.0406	0.378	ARHGAP1,ARHGAP5,CLDN2,CXCL12,EZR,MMP15,PRKCZ,TIMP4
Calcium-induced T Lymphocyte Apoptosis	1.5	0.0606	2	ATP2A2,Calm1 (includes others),PPP3CA,PRKCZ
Salvage Pathways of Pyrimidine Ribonucleotides	1.49	0.051	2.236	DAPK1,HIPK1,MAK,NME5,PRPF4B
Cell Cycle: G1/S Checkpoint Regulation	1.48	0.0597	-1	CCND2,CCND3,CDKN1A,MDM2
HIF1α Signaling	1.48	0.039	1.414	CDKN1A,HSP90AA1,HSPA2,MDM2,MMP15,PPP3CA,PRKCZ,TF
Putrescine Biosynthesis III	1.45	0.5	#NUM!	ODC1
Xenobiotic Metabolism Signaling	1.44	0.0348	#NUM!	ALDH3A2,ALDH3B1,GCLC,GSTM5,GSTO1,GSTZ1,HSP90AA1,PRKCZ,PTGES3,UGT2B7
Histamine Degradation	1.43	0.118	#NUM!	ALDH3A2,ALDH3B1
PI3K Signaling in B Lymphocytes	1.4	0.0435	2.449	Calm1 (includes others),CHUK,FOS,LYN,PPP3CA,PRKCZ
Oxidative Ethanol Degradation III	1.34	0.105	#NUM!	ALDH3A2,ALDH3B1
Xenobiotic Metabolism General Signaling Pathway	1.34	0.042	2.449	GCLC,GSTM5,GSTO1,GSTZ1,PRKCZ,UGT2B7
iNOS Signaling	1.32	0.0667	#NUM!	Calm1 (includes others),CHUK,FOS
Glioma Signaling	1.31	0.0455	#NUM!	Calm1 (includes others),CDKN1A,IDH3G,MDM2,PRKCZ
Fatty Acid α-oxidation	1.3	0.1	#NUM!	ALDH3A2,ALDH3B1
Role of Oct4 in Mammalian Embryonic Stem Cell Pluripotency	1.3	0.0652	#NUM!	FOXA2,MEF2A,RARA
VDR/RXR Activation	1.28	0.0513	#NUM!	CDKN1A,CEBPA,IGFBP5,PRKCZ
nNOS Signaling in Neurons	1.28	0.0638	#NUM!	Calm1 (includes others),PPP3CA,PRKCZ
Glutathione Biosynthesis	1.27	0.333	#NUM!	GCLC
Anandamide Degradation	1.27	0.333	#NUM!	NAAA
Oxidized GTP and dGTP Detoxification	1.27	0.333	#NUM!	RUVBL2
Putrescine Degradation III	1.26	0.0952	#NUM!	ALDH3A2,ALDH3B1
Role of PKR in Interferon Induction and Antiviral Response	1.21	0.0427	0	BAX,CHUK,FOS,HSP90AA1,HSPA2
Myc Mediated Apoptosis Signaling	1.21	0.06	#NUM!	BAX,CHUK,MDM2
Senescence Pathway	1.2	0.0327	2.333	Calm1 (includes others),CDKN1A,CHUK,EP400,MAPK15,MDM2,PPP3CA,PRKCZ,SMAD5
Ethanol Degradation IV	1.19	0.087	#NUM!	ALDH3A2,ALDH3B1
HER-2 Signaling in Breast Cancer	1.18	0.0476	#NUM!	CDKN1A,ITGB4,MDM2,PRKCZ
Aldosterone Signaling in Epithelial Cells	1.17	0.038	#NUM!	DNAJB13,HSP90AA1,HSPA2,HSPA4L,HSPH1,PRKCZ
Tumoricidal Function of Hepatic Natural Killer Cells	1.16	0.0833	#NUM!	BAX,ENDOG
Vitamin-C Transport	1.16	0.0833	#NUM!	GSTO1,TXN
Arsenate Detoxification I (Glutaredoxin)	1.15	0.25	#NUM!	GSTO1
Phenylethylamine Degradation I	1.15	0.25	#NUM!	ALDH3A2
Methylmalonyl Pathway	1.15	0.25	#NUM!	MCEE
Ascorbate Recycling (Cytosolic)	1.15	0.25	#NUM!	GSTO1
RhoA Signaling	1.14	0.0407	0.447	ARHGAP1,ARHGAP5,BAIAP2,CDC42EP3,EZR
Tryptophan Degradation X (Mammalian, via Tryptamine)	1.13	0.08	#NUM!	ALDH3A2,ALDH3B1
RANK Signaling in Osteoclasts	1.12	0.0455	2	Calm1 (includes others),CHUK,FOS,PPP3CA
Glycolysis I	1.1	0.0769	#NUM!	ALDOA,ENO4
Gluconeogenesis I	1.1	0.0769	#NUM!	ALDOA,ENO4
Unfolded protein response	1.09	0.0536	#NUM!	CEBPA,HSPA2,HSPH1
14-3-3-mediated Signaling	1.09	0.0394	#NUM!	BAX,FOS,PRKCZ,TUBA1A,TUBB4B
Prostate Cancer Signaling	1.08	0.044	#NUM!	CDKN1A,CHUK,HSP90AA1,MDM2
2-oxobutanoate Degradation I	1.06	0.2	#NUM!	MCEE
Tyrosine Degradation I	1.06	0.2	#NUM!	GSTZ1
Maturity Onset Diabetes of Young (MODY) Signaling	1.04	0.0508	#NUM!	FOXA2,HNF4A,UCP2
Bladder Cancer Signaling	1	0.0412	#NUM!	CDKN1A,DAPK1,MDM2,MMP15
TNFR2 Signaling	0.991	0.0667	#NUM!	CHUK,FOS
Dopamine Degradation	0.991	0.0667	#NUM!	ALDH3A2,ALDH3B1
Nitric Oxide Signaling in the Cardiovascular System	0.979	0.0404	1	ATP2A2,Calm1 (includes others),HSP90AA1,PRKCZ
Apoptosis Signaling	0.979	0.0404	1	BAX,CHUK,ENDOG,LMNA
Acute Phase Response Signaling	0.971	0.0335	-0.447	ALB,AMBP,CHUK,FOS,TF,TTR
Role of NFAT in Regulation of the Immune Response	0.955	0.0331	2.449	Calm1 (includes others),CHUK,FOS,LYN,MEF2A,PPP3CA
LPS/IL-1 Mediated Inhibition of RXR Function	0.947	0.0312	#NUM!	ACSL3,ALDH3A2,ALDH3B1,GSTM5,GSTO1,GSTZ1,RARA
Ethanol Degradation II	0.947	0.0625	#NUM!	ALDH3A2,ALDH3B1
Circadian Rhythm Signaling	0.924	0.0606	#NUM!	CRY1,CRY2
Thioredoxin Pathway	0.921	0.143	#NUM!	TXN
Serotonin Degradation	0.917	0.0448	#NUM!	ALDH3A2,ALDH3B1,UGT2B7
Protein Ubiquitination Pathway	0.91	0.0293	#NUM!	DNAJB13,HSP90AA1,HSPA2,HSPA4L,HSPH1,MDM2,USP19,USP2
T Cell Receptor Signaling	0.91	0.0381	#NUM!	Calm1 (includes others),CHUK,FOS,PPP3CA
Nur77 Signaling in T Lymphocytes	0.903	0.0441	#NUM!	Calm1 (includes others),PPP3CA,PRKCZ
IL-17A Signaling in Fibroblasts	0.879	0.0571	#NUM!	CHUK,FOS
Noradrenaline and Adrenaline Degradation	0.879	0.0571	#NUM!	ALDH3A2,ALDH3B1
Growth Hormone Signaling	0.863	0.0423	#NUM!	CEBPA,FOS,PRKCZ
Interferon Signaling	0.86	0.0556	#NUM!	BAX,IFITM3
Notch Signaling	0.842	0.0541	#NUM!	DTX3,FURIN
Sucrose Degradation V (Mammalian)	0.821	0.111	#NUM!	ALDOA
IL-8 Signaling	0.81	0.03	1.633	BAX,CCND2,CCND3,CHUK,FOS,PRKCZ
Apelin Endothelial Signaling Pathway	0.81	0.0348	2	Calm1 (includes others),FOS,MEF2A,PRKCZ
April Mediated Signaling	0.807	0.0513	#NUM!	CHUK,FOS
Inhibition of Matrix Metalloproteases	0.807	0.0513	#NUM!	MMP15,TIMP4
Necroptosis Signaling Pathway	0.807	0.0318	2.236	CHUK,DAPK1,MDM2,PPP3CA,TOMM7
HOTAIR Regulatory Pathway	0.783	0.0312	-0.447	ATXN1,CDKN1A,MDM2,MMP15,WNT4
Calcium Transport I	0.777	0.1	#NUM!	ATP2A2
Ketolysis	0.777	0.1	#NUM!	OXCT1
IL-7 Signaling Pathway	0.777	0.0385	#NUM!	BAX,CCND3,LYN
B Cell Activating Factor Signaling	0.772	0.0488	#NUM!	CHUK,FOS
IL-3 Signaling	0.764	0.038	#NUM!	FOS,PPP3CA,PRKCZ
CD28 Signaling in T Helper Cells	0.762	0.0333	2	Calm1 (includes others),CHUK,FOS,PPP3CA
Molecular Mechanisms of Cancer	0.762	0.0256	#NUM!	BAX,CCND2,CCND3,CDKN1A,FOS,MDM2,PRKCZ,RALGDS,SMAD5,WNT4
LXR/RXR Activation	0.754	0.0331	2	ALB,AMBP,TF,TTR
Chemokine Signaling	0.754	0.0375	#NUM!	Calm1 (includes others),CXCL12,FOS
Cyclins and Cell Cycle Regulation	0.742	0.037	#NUM!	CCND2,CCND3,CDKN1A
γ-glutamyl Cycle	0.74	0.0909	#NUM!	GCLC
LPS-stimulated MAPK Signaling	0.733	0.0366	#NUM!	CHUK,FOS,PRKCZ
Tight Junction Signaling	0.724	0.0298	#NUM!	CEBPA,CLDN2,FOS,OCLN,PRKCZ
TR/RXR Activation	0.712	0.0357	#NUM!	MDM2,STRBP,UCP2
Guanosine Nucleotides Degradation III	0.706	0.0833	#NUM!	NT5C2
Role of Macrophages, Fibroblasts and Endothelial Cells in Rheumatoid Arthritis	0.688	0.0256	#NUM!	Calm1 (includes others),CEBPA,CHUK,CXCL12,FOS,PPP3CA,PRKCZ,WNT4
Wnt/β-catenin Signaling	0.688	0.0289	0	APPL2,MDM2,RARA,RUVBL2,WNT4
Role of Osteoblasts, Osteoclasts and Chondrocytes in Rheumatoid Arthritis	0.68	0.0273	#NUM!	Calm1 (includes others),CHUK,FOS,PPP3CA,SMAD5,WNT4
Fatty Acid Activation	0.676	0.0769	#NUM!	ACSL3
Acyl-CoA Hydrolysis	0.676	0.0769	#NUM!	HNF4A
Oleate Biosynthesis II (Animals)	0.676	0.0769	#NUM!	FADS6
Urate Biosynthesis/Inosine 5'-phosphate Degradation	0.676	0.0769	#NUM!	NT5C2
Stearate Biosynthesis I (Animals)	0.668	0.0417	#NUM!	ACSL3,HNF4A
IL-12 Signaling and Production in Macrophages	0.664	0.0303	#NUM!	ALB,CHUK,FOS,PRKCZ
Acute Myeloid Leukemia Signaling	0.662	0.0337	#NUM!	CEBPA,IDH3G,RARA
Cell Cycle: G2/M DNA Damage Checkpoint Regulation	0.654	0.0408	#NUM!	CDKN1A,MDM2
Phenylalanine Degradation IV (Mammalian, via Side Chain)	0.648	0.0714	#NUM!	ALDH3A2
Melanoma Signaling	0.64	0.04	#NUM!	CDKN1A,MDM2
TNFR1 Signaling	0.64	0.04	#NUM!	CHUK,FOS
Systemic Lupus Erythematosus In B Cell Signaling Pathway	0.636	0.0255	1.89	Calm1 (includes others),CCND2,CCND3,FOS,LYN,PPP3CA,PRKCZ
UVC-Induced MAPK Signaling	0.629	0.0392	#NUM!	FOS,PRKCZ
Adenosine Nucleotides Degradation II	0.622	0.0667	#NUM!	NT5C2
Fcγ Receptor-mediated Phagocytosis in Macrophages and Monocytes	0.616	0.0319	#NUM!	EZR,LYN,PRKCZ
CCR5 Signaling in Macrophages	0.616	0.0319	#NUM!	Calm1 (includes others),FOS,PRKCZ
UVB-Induced MAPK Signaling	0.616	0.0385	#NUM!	FOS,PRKCZ
Estrogen Receptor Signaling	0.613	0.0244	1.134	CDKN1A,DDX5,FBXO32,FOS,HSP90AA1,MED31,MMP15,PRKCZ
CD27 Signaling in Lymphocytes	0.604	0.0377	#NUM!	CHUK,FOS
Neuregulin Signaling	0.6	0.0312	#NUM!	GRB7,HSP90AA1,PRKCZ
TGF-β Signaling	0.6	0.0312	#NUM!	FOS,HNF4A,SMAD5
Granzyme B Signaling	0.597	0.0625	#NUM!	ENDOG
Glutaryl-CoA Degradation	0.597	0.0625	#NUM!	CYP2S1
Type II Diabetes Mellitus Signaling	0.592	0.0282	#NUM!	ACSL3,ADIPOR2,CHUK,PRKCZ
Endocannabinoid Cancer Inhibition Pathway	0.585	0.028	0	CCND2,CCND3,CDKN1A,NUPR1
Glucocorticoid Receptor Signaling	0.578	0.0238	#NUM!	CDKN1A,CEBPA,CHUK,FOS,HSP90AA1,HSPA2,PPP3CA,PTGES3
Apelin Cardiomyocyte Signaling Pathway	0.575	0.0303	#NUM!	ATP2A2,MAPK15,PRKCZ
γ-linolenate Biosynthesis II (Animals)	0.573	0.0588	#NUM!	ACSL3
Dermatan Sulfate Degradation (Metazoa)	0.573	0.0588	#NUM!	IDS
Mitochondrial L-carnitine Shuttle Pathway	0.573	0.0588	#NUM!	ACSL3
Corticotropin Releasing Hormone Signaling	0.572	0.0276	#NUM!	Calm1 (includes others),FOS,MEF2A,PRKCZ
Clathrin-mediated Endocytosis Signaling	0.567	0.0259	#NUM!	ALB,ITGB4,MDM2,PPP3CA,TF
Nicotine Degradation III	0.559	0.0351	#NUM!	CYP2S1,UGT2B7
Signaling by Rho Family GTPases	0.553	0.0246	2.236	BAIAP2,CDC42EP3,CDH4,EZR,FOS,PRKCZ
Purine Nucleotides Degradation II (Aerobic)	0.553	0.0556	#NUM!	NT5C2
Chronic Myeloid Leukemia Signaling	0.544	0.0291	#NUM!	CDKN1A,CHUK,MDM2
Sumoylation Pathway	0.544	0.0291	#NUM!	CEBPA,FOS,MDM2
Coronavirus Pathogenesis Pathway	0.541	0.0267	0	BAX,CHUK,FOS,RPS27L
PPAR Signaling	0.538	0.0288	#NUM!	CHUK,FOS,HSP90AA1
IGF-1 Signaling	0.538	0.0288	#NUM!	FOS,IGFBP5,PRKCZ
Opioid Signaling Pathway	0.538	0.0243	2.449	Calm1 (includes others),FOS,LYN,MAPK15,PPP3CA,PRKCZ
Melatonin Degradation I	0.529	0.0333	#NUM!	CYP2S1,UGT2B7
Epithelial Adherens Junction Signaling	0.529	0.0263	#NUM!	BAIAP2,LMO7,TUBA1A,TUBB4B
PCP pathway	0.529	0.0333	#NUM!	VANGL1,WNT4
Induction of Apoptosis by HIV1	0.52	0.0328	#NUM!	BAX,CHUK
Telomerase Signaling	0.516	0.028	#NUM!	CDKN1A,HSP90AA1,PTGES3
Pancreatic Adenocarcinoma Signaling	0.502	0.0275	#NUM!	CDKN1A,MDM2,RALGDS
Antioxidant Action of Vitamin C	0.502	0.0275	#NUM!	CHUK,GSTO1,TXN
Thrombopoietin Signaling	0.5	0.0317	#NUM!	FOS,PRKCZ
Regulation of eIF4 and p70S6K Signaling	0.5	0.0255	#NUM!	EIF1AX,EIF4G3,PRKCZ,RPS27L
Gαq Signaling	0.495	0.0253	2	Calm1 (includes others),CHUK,PPP3CA,PRKCZ
Phospholipase C Signaling	0.493	0.0233	2.449	Calm1 (includes others),LYN,MEF2A,PPP3CA,PRKCZ,RALGDS
eNOS Signaling	0.489	0.0252	#NUM!	Calm1 (includes others),HSP90AA1,HSPA2,PRKCZ
iCOS-iCOSL Signaling in T Helper Cells	0.488	0.027	#NUM!	Calm1 (includes others),CHUK,PPP3CA
HGF Signaling	0.488	0.027	#NUM!	CDKN1A,FOS,PRKCZ
PXR/RXR Activation	0.483	0.0308	#NUM!	ALDH3A2,HNF4A
CD40 Signaling	0.483	0.0308	#NUM!	CHUK,FOS
Nicotine Degradation II	0.483	0.0308	#NUM!	CYP2S1,UGT2B7
Superpathway of Melatonin Degradation	0.483	0.0308	#NUM!	CYP2S1,UGT2B7
Rac Signaling	0.481	0.0268	#NUM!	BAIAP2,IQGAP2,PRKCZ
Polyamine Regulation in Colon Cancer	0.48	0.0455	#NUM!	ODC1
Pyrimidine Deoxyribonucleotides De Novo Biosynthesis I	0.48	0.0455	#NUM!	NME5
Mitotic Roles of Polo-Like Kinase	0.474	0.0303	#NUM!	HSP90AA1,PTTG1
NGF Signaling	0.469	0.0263	#NUM!	BAX,CHUK,PRKCZ
Dopamine-DARPP32 Feedback in cAMP Signaling	0.467	0.0245	#NUM!	ATP2A2,Calm1 (includes others),PPP3CA,PRKCZ
Tryptophan Degradation III (Eukaryotic)	0.465	0.0435	#NUM!	CYP2S1
Remodeling of Epithelial Adherens Junctions	0.457	0.0294	#NUM!	TUBA1A,TUBB4B
fMLP Signaling in Neutrophils	0.456	0.0259	#NUM!	Calm1 (includes others),PPP3CA,PRKCZ
IL-10 Signaling	0.45	0.029	#NUM!	CHUK,FOS
Glutathione Redox Reactions I	0.45	0.0417	#NUM!	GSTZ1
TCA Cycle II (Eukaryotic)	0.45	0.0417	#NUM!	IDH3G
SPINK1 General Cancer Pathway	0.45	0.029	#NUM!	Mt1,Mt2
CXCR4 Signaling	0.447	0.024	#NUM!	CXCL12,FOS,LYN,PRKCZ
Cdc42 Signaling	0.447	0.024	#NUM!	BAIAP2,FOS,IQGAP2,PRKCZ
GM-CSF Signaling	0.441	0.0286	#NUM!	LYN,PPP3CA
Cholecystokinin/Gastrin-mediated Signaling	0.438	0.0252	#NUM!	FOS,MEF2A,PRKCZ
GP6 Signaling Pathway	0.438	0.0252	#NUM!	Calm1 (includes others),LYN,PRKCZ
IL-17A Signaling in Gastric Cells	0.437	0.04	#NUM!	FOS
Bupropion Degradation	0.437	0.04	#NUM!	CYP2S1
IL-15 Production	0.427	0.0248	#NUM!	DDR1,LYN,PRKCZ
Melatonin Signaling	0.426	0.0278	#NUM!	Calm1 (includes others),PRKCZ
ERK5 Signaling	0.426	0.0278	#NUM!	FOS,MEF2A
Estrogen-mediated S-phase Entry	0.423	0.0385	#NUM!	CDKN1A
NAD Salvage Pathway II	0.423	0.0385	#NUM!	NT5C2
Caveolar-mediated Endocytosis Signaling	0.419	0.0274	#NUM!	ALB,ITGB4
Hypoxia Signaling in the Cardiovascular System	0.411	0.027	#NUM!	HSP90AA1,MDM2
PI3K/AKT Signaling	0.409	0.0229	1	CDKN1A,CHUK,HSP90AA1,MDM2
Angiopoietin Signaling	0.405	0.0267	#NUM!	CHUK,GRB7
PTEN Signaling	0.399	0.0238	#NUM!	CDKN1A,CHUK,PRKCZ
Erythropoietin Signaling	0.398	0.0263	#NUM!	FOS,PRKCZ
Toll-like Receptor Signaling	0.398	0.0263	#NUM!	CHUK,FOS
Macropinocytosis Signaling	0.398	0.0263	#NUM!	ITGB4,PRKCZ
RhoGDI Signaling	0.387	0.0222	-2	ARHGAP1,ARHGAP5,CDH4,EZR
Granulocyte Adhesion and Diapedesis	0.387	0.0222	#NUM!	CLDN2,CXCL12,EZR,MMP15
Role of p14/p19ARF in Tumor Suppression	0.386	0.0345	#NUM!	MDM2
Synaptic Long Term Potentiation	0.384	0.0233	#NUM!	Calm1 (includes others),PPP3CA,PRKCZ
Gα12/13 Signaling	0.379	0.0231	#NUM!	CDH4,CHUK,MEF2A
JAK/Stat Signaling	0.371	0.025	#NUM!	CDKN1A,FOS
Hepatic Cholestasis	0.367	0.0216	#NUM!	CHUK,HNF4A,PRKCZ,RARA
Sertoli Cell-Sertoli Cell Junction Signaling	0.367	0.0216	#NUM!	CLDN2,OCLN,TUBA1A,TUBB4B
B Cell Receptor Signaling	0.367	0.0216	2	Calm1 (includes others),CHUK,LYN,PPP3CA
Sirtuin Signaling Pathway	0.367	0.0206	-1	BAX,DUSP6,MAPK15,TOMM7,TUBA1A,UCP2
Prolactin Signaling	0.365	0.0247	#NUM!	FOS,PRKCZ
Acetone Degradation I (to Methylglyoxal)	0.365	0.0323	#NUM!	CYP2S1
Adipogenesis pathway	0.36	0.0224	#NUM!	CEBPA,SMAD5,TXNIP
NF-κB Activation by Viruses	0.359	0.0244	#NUM!	CHUK,PRKCZ
Apelin Adipocyte Signaling Pathway	0.359	0.0244	#NUM!	GSTZ1,MAPK15
4-1BB Signaling in T Lymphocytes	0.355	0.0312	#NUM!	CHUK
Production of Nitric Oxide and Reactive Oxygen Species in Macrophages	0.355	0.0213	2	ALB,CHUK,FOS,PRKCZ
Fatty Acid β-oxidation I	0.355	0.0312	#NUM!	ACSL3
Androgen Signaling	0.35	0.0221	#NUM!	Calm1 (includes others),HSP90AA1,PRKCZ
VEGF Family Ligand-Receptor Interactions	0.347	0.0238	#NUM!	FOS,PRKCZ
HIPPO signaling	0.341	0.0235	#NUM!	SMAD5,TP53BP2
Agranulocyte Adhesion and Diapedesis	0.335	0.0207	#NUM!	CLDN2,CXCL12,EZR,MMP15
RAR Activation	0.332	0.0206	#NUM!	FOS,PRKCZ,RARA,SMAD5
TWEAK Signaling	0.326	0.0286	#NUM!	CHUK
Ceramide Signaling	0.324	0.0227	#NUM!	FOS,PRKCZ
D-myo-inositol (1,4,5,6)-Tetrakisphosphate Biosynthesis	0.323	0.0211	#NUM!	ATP1A1,NUDT4,PPP3CA
D-myo-inositol (3,4,5,6)-tetrakisphosphate Biosynthesis	0.323	0.0211	#NUM!	ATP1A1,NUDT4,PPP3CA
Adrenomedullin signaling pathway	0.321	0.0203	2	BAX,Calm1 (includes others),FOS,MAPK15
Gap Junction Signaling	0.317	0.0202	#NUM!	PPP3CA,PRKCZ,TUBA1A,TUBB4B
Colorectal Cancer Metastasis Signaling	0.316	0.0198	1.342	BAX,FOS,MMP15,RALGDS,WNT4
Superpathway of Methionine Degradation	0.309	0.027	#NUM!	MCEE
IL-1 Signaling	0.308	0.022	#NUM!	CHUK,FOS
Death Receptor Signaling	0.308	0.022	#NUM!	CHUK,LMNA
Hepatic Fibrosis Signaling Pathway	0.302	0.019	1.89	BAMBI,Calm1 (includes others),CHUK,FOS,PRKCZ,TF,WNT4
Docosahexaenoic Acid (DHA) Signaling	0.301	0.0263	#NUM!	BAX
Thyroid Hormone Metabolism II (via Conjugation and/or Degradation)	0.301	0.0263	#NUM!	UGT2B7
Antiproliferative Role of TOB in T Cell Signaling	0.293	0.0256	#NUM!	TOB1
ErbB Signaling	0.293	0.0213	#NUM!	FOS,PRKCZ
Antigen Presentation Pathway	0.293	0.0256	#NUM!	MR1
Factors Promoting Cardiogenesis in Vertebrates	0.292	0.02	#NUM!	PRKCZ,SMAD5,WNT4
Axonal Guidance Signaling	0.29	0.0186	#NUM!	BAIAP2,CXCL12,MMP15,PLXNB2,PPP3CA,PRKCZ,TUBA1A,TUBB4B,WNT4
Calcium Signaling	0.29	0.0194	2	ATP2A2,Calm1 (includes others),MEF2A,PPP3CA
α-Adrenergic Signaling	0.284	0.0208	#NUM!	Calm1 (includes others),PRKCZ
Amyotrophic Lateral Sclerosis Signaling	0.279	0.0206	#NUM!	BAX,PPP3CA
ATM Signaling	0.279	0.0206	#NUM!	CDKN1A,MDM2
Mechanisms of Viral Exit from Host Cells	0.278	0.0244	#NUM!	PRKCZ
nNOS Signaling in Skeletal Muscle Cells	0.278	0.0244	#NUM!	Calm1 (includes others)
Estrogen Biosynthesis	0.278	0.0244	#NUM!	CYP2S1
PKCθ Signaling in T Lymphocytes	0.273	0.0194	#NUM!	CHUK,FOS,PPP3CA
MIF Regulation of Innate Immunity	0.271	0.0238	#NUM!	FOS
Retinol Biosynthesis	0.271	0.0238	#NUM!	AADAC
Pyrimidine Ribonucleotides Interconversion	0.271	0.0238	#NUM!	NME5
3-phosphoinositide Degradation	0.269	0.0192	#NUM!	ATP1A1,NUDT4,PPP3CA
Integrin Signaling	0.268	0.0188	2	ARHGAP5,ASAP1,GRB7,ITGB4
D-myo-inositol-5-phosphate Metabolism	0.266	0.0191	#NUM!	ATP1A1,NUDT4,PPP3CA
Role of NFAT in Cardiac Hypertrophy	0.265	0.0187	2	Calm1 (includes others),MEF2A,PPP3CA,PRKCZ
Neuropathic Pain Signaling In Dorsal Horn Neurons	0.261	0.0198	#NUM!	FOS,PRKCZ
Role of RIG1-like Receptors in Antiviral Innate Immunity	0.258	0.0227	#NUM!	CHUK
Pyrimidine Ribonucleotides De Novo Biosynthesis	0.258	0.0227	#NUM!	NME5
FAT10 Cancer Signaling Pathway	0.246	0.0217	#NUM!	CHUK
Tec Kinase Signaling	0.243	0.0183	#NUM!	FOS,LYN,PRKCZ
Glioblastoma Multiforme Signaling	0.24	0.0182	#NUM!	CDKN1A,MDM2,WNT4
Triacylglycerol Degradation	0.24	0.0213	#NUM!	AADAC
Virus Entry via Endocytic Pathways	0.237	0.0187	#NUM!	ITGB4,PRKCZ
Spliceosomal Cycle	0.234	0.0208	#NUM!	SF3B2
Lymphotoxin β Receptor Signaling	0.208	0.0189	#NUM!	CHUK
Transcriptional Regulatory Network in Embryonic Stem Cells	0.203	0.0185	#NUM!	HNF4A
EGF Signaling	0.198	0.0182	#NUM!	FOS
Natural Killer Cell Signaling	0	0.00508	#NUM!	HSPA2
Fc Epsilon RI Signaling	0	0.0171	#NUM!	LYN,PRKCZ
Actin Cytoskeleton Signaling	0	0.0138	#NUM!	BAIAP2,EZR,IQGAP2
Synaptic Long Term Depression	0	0.0106	#NUM!	LYN,PRKCZ
Huntington's Disease Signaling	0	0.0169	#NUM!	BAX,HSPA2,IFT57,PRKCZ
PPARα/RXRα Activation	0	0.0158	#NUM!	ADIPOR2,CHUK,HSP90AA1
Hepatic Fibrosis / Hepatic Stellate Cell Activation	0	0.0161	#NUM!	BAMBI,BAX,IGFBP5
Mitochondrial Dysfunction	0	0.0175	#NUM!	FURIN,PRDX5,UCP2
Regulation of Actin-based Motility by Rho	0	0.0106	#NUM!	BAIAP2
Role of BRCA1 in DNA Damage Response	0	0.0125	#NUM!	CDKN1A
Activation of IRF by Cytosolic Pattern Recognition Receptors	0	0.0159	#NUM!	CHUK
Role of Pattern Recognition Receptors in Recognition of Bacteria and Viruses	0	0.00649	#NUM!	PRKCZ
FcγRIIB Signaling in B Lymphocytes	0	0.0133	#NUM!	LYN
Airway Pathology in Chronic Obstructive Pulmonary Disease	0	0.00847	#NUM!	AMBP
CCR3 Signaling in Eosinophils	0	0.0161	#NUM!	Calm1 (includes others),PRKCZ
Dendritic Cell Maturation	0	0.00546	#NUM!	CHUK
Reelin Signaling in Neurons	0	0.00775	#NUM!	LYN
Cellular Effects of Sildenafil (Viagra)	0	0.00763	#NUM!	Calm1 (includes others)
Endothelin-1 Signaling	0	0.016	#NUM!	FOS,MAPK15,PRKCZ
Relaxin Signaling	0	0.0133	#NUM!	FOS,PRKCZ
Renin-Angiotensin Signaling	0	0.0169	#NUM!	FOS,PRKCZ
Semaphorin Signaling in Neurons	0	0.0167	#NUM!	ARHGAP1
Thrombin Signaling	0	0.00481	#NUM!	PRKCZ
Cardiac Hypertrophy Signaling	0	0.0125	#NUM!	Calm1 (includes others),MEF2A,PPP3CA
CDK5 Signaling	0	0.00926	#NUM!	MAPK15
HMGB1 Signaling	0	0.00606	#NUM!	FOS
Role of CHK Proteins in Cell Cycle Checkpoint Control	0	0.0175	#NUM!	CDKN1A
GNRH Signaling	0	0.0173	#NUM!	Calm1 (includes others),FOS,PRKCZ
Human Embryonic Stem Cell Pluripotency	0	0.0148	#NUM!	SMAD5,WNT4
Antiproliferative Role of Somatostatin Receptor 2	0	0.013	#NUM!	CDKN1A
Germ Cell-Sertoli Cell Junction Signaling	0	0.0117	#NUM!	TUBA1A,TUBB4B
Role of NANOG in Mammalian Embryonic Stem Cell Pluripotency	0	0.0168	#NUM!	SMAD5,WNT4
CREB Signaling in Neurons	0	0.00966	#NUM!	Calm1 (includes others),PRKCZ
Renal Cell Carcinoma Signaling	0	0.0125	#NUM!	FOS
Type I Diabetes Mellitus Signaling	0	0.00901	#NUM!	CHUK
Small Cell Lung Cancer Signaling	0	0.0141	#NUM!	CHUK
Basal Cell Carcinoma Signaling	0	0.0139	#NUM!	WNT4
Thyroid Cancer Signaling	0	0.0127	#NUM!	FOS
p70S6K Signaling	0	0.0155	#NUM!	LYN,PRKCZ
mTOR Signaling	0	0.0143	#NUM!	EIF4G3,PRKCZ,RPS27L
G Beta Gamma Signaling	0	0.0082	#NUM!	PRKCZ
Systemic Lupus Erythematosus Signaling	0	0.0131	#NUM!	FOS,LYN,PRPF4B
ILK Signaling	0	0.0158	#NUM!	DSP,FOS,ITGB4
FAK Signaling	0	0.0105	#NUM!	ASAP1
EIF2 Signaling	0	0.0134	#NUM!	EIF1AX,EIF4G3,RPS27L
Retinoic acid Mediated Apoptosis Signaling	0	0.0167	#NUM!	RARA
AMPK Signaling	0	0.00935	#NUM!	CDKN1A,HNF4A
Hereditary Breast Cancer Signaling	0	0.00714	#NUM!	CDKN1A
Ovarian Cancer Signaling	0	0.00719	#NUM!	WNT4
Altered T Cell and B Cell Signaling in Rheumatoid Arthritis	0	0.0111	#NUM!	CHUK
Atherosclerosis Signaling	0	0.0157	#NUM!	ALB,CXCL12
Protein Kinase A Signaling	0	0.0175	0.816	AKAP13,Calm1 (includes others),CHUK,DUSP18,DUSP6,PPP3CA,PRKCZ
Estrogen-Dependent Breast Cancer Signaling	0	0.0135	#NUM!	FOS
Glioma Invasiveness Signaling	0	0.0135	#NUM!	TIMP4
Breast Cancer Regulation by Stathmin1	0	0.00846	#NUM!	CCND2,CCND3,PRKCZ,TUBA1A,TUBB4B
Role of Wnt/GSK-3β Signaling in the Pathogenesis of Influenza	0	0.0128	#NUM!	WNT4
Role of MAPK Signaling in the Pathogenesis of Influenza	0	0.0125	#NUM!	BAX
MSP-RON Signaling Pathway	0	0.0172	#NUM!	PRKCZ
P2Y Purigenic Receptor Signaling Pathway	0	0.0157	#NUM!	FOS,PRKCZ
Role of Tissue Factor in Cancer	0	0.00855	#NUM!	LYN
IL-17A Signaling in Airway Cells	0	0.0156	#NUM!	CHUK
Actin Nucleation by ARP-WASP Complex	0	0.0139	#NUM!	BAIAP2
Paxillin Signaling	0	0.00926	#NUM!	ITGB4
Mouse Embryonic Stem Cell Pluripotency	0	0.00971	#NUM!	SMAD5
Ephrin B Signaling	0	0.0139	#NUM!	CXCL12
ErbB4 Signaling	0	0.0149	#NUM!	PRKCZ
GDNF Family Ligand-Receptor Interactions	0	0.0132	#NUM!	FOS
Netrin Signaling	0	0.0154	#NUM!	PPP3CA
Heparan Sulfate Biosynthesis	0	0.0128	#NUM!	AADAC
Heparan Sulfate Biosynthesis (Late Stages)	0	0.0141	#NUM!	AADAC
Superpathway of Inositol Phosphate Compounds	0	0.0151	#NUM!	ATP1A1,NUDT4,PPP3CA
3-phosphoinositide Biosynthesis	0	0.0181	#NUM!	ATP1A1,NUDT4,PPP3CA
Gαi Signaling	0	0.008	#NUM!	RALGDS
PEDF Signaling	0	0.0122	#NUM!	CHUK
Regulation of Cellular Mechanics by Calpain Protease	0	0.0154	#NUM!	EZR
Regulation of the Epithelial-Mesenchymal Transition Pathway	0	0.00521	#NUM!	WNT4
Sperm Motility	0	0.0179	#NUM!	Calm1 (includes others),DDR1,LYN,PRKCZ
UVA-Induced MAPK Signaling	0	0.0102	#NUM!	FOS
STAT3 Pathway	0	0.00741	#NUM!	CDKN1A
Wnt/Ca+ pathway	0	0.0161	#NUM!	PPP3CA
ERK/MAPK Signaling	0	0.0104	#NUM!	DUSP6,FOS
Cardiac β-adrenergic Signaling	0	0.0142	#NUM!	AKAP13,ATP2A2
IL-2 Signaling	0	0.0164	#NUM!	FOS
Insulin Receptor Signaling	0	0.00714	#NUM!	PRKCZ
Neurotrophin/TRK Signaling	0	0.0132	#NUM!	FOS
cAMP-mediated signaling	0	0.0175	#NUM!	AKAP13,Calm1 (includes others),DUSP6,PPP3CA
p38 MAPK Signaling	0	0.00847	#NUM!	MEF2A
Glutamate Receptor Signaling	0	0.0175	#NUM!	Calm1 (includes others)
NF-κB Signaling	0	0.0112	#NUM!	CHUK,PRKCZ
VEGF Signaling	0	0.0101	#NUM!	EIF1AX
G-Protein Coupled Receptor Signaling	0	0.00735	#NUM!	CHUK,DUSP6
IL-6 Signaling	0	0.016	#NUM!	CHUK,FOS
PDGF Signaling	0	0.0116	#NUM!	FOS
BMP signaling pathway	0	0.0118	#NUM!	SMAD5
GPCR-Mediated Nutrient Sensing in Enteroendocrine Cells	0	0.00893	#NUM!	PRKCZ
Phagosome Formation	0	0.008	#NUM!	PRKCZ
Autophagy	0	0.0164	#NUM!	CTSH
PD-1, PD-L1 cancer immunotherapy pathway	0	0.00943	#NUM!	MR1
Cancer Drug Resistance By Drug Efflux	0	0.0172	#NUM!	MDM2
Osteoarthritis Pathway	0	0.00948	#NUM!	CHUK,SMAD5
Neuroinflammation Signaling Pathway	0	0.0167	1.342	CHUK,CXCL12,FOS,MAPK15,PPP3CA
Iron homeostasis signaling pathway	0	0.0146	#NUM!	SMAD5,TF
Th17 Activation Pathway	0	0.011	#NUM!	HSP90AA1
SPINK1 Pancreatic Cancer Pathway	0	0.0167	#NUM!	CPM
NER Pathway	0	0.00971	#NUM!	POLK
Endocannabinoid Neuronal Synapse Pathway	0	0.0156	#NUM!	MAPK15,PPP3CA
Endocannabinoid Developing Neuron Pathway	0	0.0087	#NUM!	MAPK15
Cardiac Hypertrophy Signaling (Enhanced)	0	0.0164	2.828	AKAP13,ATP2A2,Calm1 (includes others),CHUK,MEF2A,PPP3CA,PRKCZ,WNT4
T Cell Exhaustion Signaling Pathway	0	0.00571	#NUM!	FOS
Synaptogenesis Signaling Pathway	0	0.00962	#NUM!	Calm1 (includes others),CDH4,LYN
Systemic Lupus Erythematosus In T Cell Signaling Pathway	0	0.00898	#NUM!	EZR,FOS,PPP3CA
White Adipose Tissue Browning Pathway	0	0.00775	#NUM!	RARA
Inhibition of ARE-Mediated mRNA Degradation Pathway	0	0.0082	#NUM!	MAPK15
BEX2 Signaling Pathway	0	0.0127	#NUM!	CDKN1A
Insulin Secretion Signaling Pathway	0	0.0165	2	EIF4G3,FURIN,LYN,PRKCZ
Semaphorin Neuronal Repulsive Signaling Pathway	0	0.00769	#NUM!	Pde4d
Regulation Of The Epithelial Mesenchymal Transition By Growth Factors Pathway	0	0.016	#NUM!	CHUK,FOS,OCLN
Regulation Of The Epithelial Mesenchymal Transition In Development Pathway	0	0.0119	#NUM!	WNT4
Kinetochore Metaphase Signaling Pathway	0	0.0099	#NUM!	PTTG1
Ephrin Receptor Signaling	0	0.00556	#NUM!	CXCL12

## Sheet: DBA+ cluster 4 vs all
© 2000-2020 QIAGEN. All rights reserved.
Ingenuity Canonical Pathways	-log(p-value)	Ratio	z-score	Molecules
Hepatic Fibrosis / Hepatic Stellate Cell Activation	6.71	0.0526	#NUM!	CD14,CSF1,EDN1,IFNGR1,IGF1,KLF6,MYH9,NFKB2,TGFB3,TIMP2
Leukocyte Extravasation Signaling	6.44	0.0493	1.414	ACTG1,CD44,CLDN4,CLDN7,CTNNA1,EZR,F11R,ITGA3,TIMP2,TIMP3
Death Receptor Signaling	5.95	0.0769	-0.378	ACTG1,BIRC2,BIRC3,HSPB1,LMNA,NFKB2,NFKBIA
Tight Junction Signaling	5.15	0.0476	#NUM!	ACTG1,CLDN4,CLDN7,CTNNA1,F11R,MYH9,NFKB2,TGFB3
RhoGDI Signaling	4.82	0.043	-2.828	ACTG1,CD44,EZR,ITGA3,MYL12A,MYL12B,RHOC,WASF2
Lymphotoxin β Receptor Signaling	4.74	0.0909	#NUM!	BIRC2,LTB,NFKB2,NFKBIA,RELB
Agranulocyte Adhesion and Diapedesis	4.69	0.0412	#NUM!	ACTG1,CLDN4,CLDN7,CXCL16,EZR,ITGA3,MYH9,SDC4
TNFR2 Signaling	4.55	0.133	0	BIRC2,BIRC3,NFKB2,NFKBIA
TWEAK Signaling	4.28	0.114	-1	BIRC2,BIRC3,NFKB2,NFKBIA
Actin Cytoskeleton Signaling	4.28	0.036	2.646	ACTG1,CD14,EZR,ITGA3,MYH9,MYL12A,MYL12B,WASF2
Cdc42 Signaling	4.18	0.0414	2	B2M,CDC42EP5,HLA-A,HLA-E,ITGA3,MYL12A,MYL12B
Antigen Presentation Pathway	4.09	0.103	#NUM!	B2M,HLA-A,HLA-E,TAPBP
Caveolar-mediated Endocytosis Signaling	4.09	0.0667	#NUM!	ACTG1,B2M,HLA-A,HLA-E,ITGA3
PI3K/AKT Signaling	4.01	0.0389	1.633	HSP90AA1,IL6ST,ITGA3,NFKB2,NFKBIA,SFN,YWHAH
RhoA Signaling	4.01	0.048	2.449	ACTG1,CDC42EP5,EZR,IGF1,MYL12A,MYL12B
IL-6 Signaling	4.01	0.048	2.236	CD14,CEBPB,HSPB1,IL6ST,NFKB2,NFKBIA
Neuroinflammation Signaling Pathway	3.98	0.0287	2.828	B2M,BIRC2,BIRC3,HLA-A,HLA-E,IFNGR1,MFGE8,NFKB2,TGFB3
Signaling by Rho Family GTPases	3.97	0.0325	2.828	ACTG1,CDC42EP5,EZR,ITGA3,MYL12A,MYL12B,NFKB2,RHOC
Dendritic Cell Maturation	3.95	0.038	2.449	B2M,HLA-A,HLA-E,LTB,NFKB2,NFKBIA,RELB
Sertoli Cell-Sertoli Cell Junction Signaling	3.82	0.0363	#NUM!	ACTG1,CLDN4,CLDN7,CTNNA1,F11R,ITGA3,TGFB3
iNOS Signaling	3.74	0.0833	2	CD14,IFNGR1,NFKB2,NFKBIA
Crosstalk between Dendritic Cells and Natural Killer Cells	3.71	0.0556	#NUM!	ACTG1,HLA-A,HLA-E,LTB,NFKB2
Altered T Cell and B Cell Signaling in Rheumatoid Arthritis	3.71	0.0556	#NUM!	CSF1,HLA-A,LTB,NFKB2,RELB
OX40 Signaling Pathway	3.71	0.0556	#NUM!	B2M,HLA-A,HLA-E,NFKB2,NFKBIA
Glucocorticoid Receptor Signaling	3.7	0.0263	#NUM!	CEBPB,HSP90AA1,KRT18,KRT19,KRT7,NFKBIA,TGFB3,TSC22D3,YWHAH
TNFR1 Signaling	3.67	0.08	0	BIRC2,BIRC3,NFKB2,NFKBIA
Protein Ubiquitination Pathway	3.61	0.0289	#NUM!	B2M,BIRC2,BIRC3,CRYAB,HLA-A,HLA-E,HSP90AA1,HSPB1
Apoptosis Signaling	3.52	0.0505	-0.447	BIRC2,BIRC3,LMNA,NFKB2,NFKBIA
Osteoarthritis Pathway	3.5	0.0321	1.342	ANXA2,CEBPB,CTNNA1,ITGA3,NFKB2,SDC4,TIMP3
Hepatic Fibrosis Signaling Pathway	3.38	0.0238	2.333	CEBPB,EDN1,ITGA3,MYL12A,MYL12B,NFKB2,NFKBIA,RHOC,TGFB3
PD-1, PD-L1 cancer immunotherapy pathway	3.36	0.0467	-1	B2M,HLA-A,HLA-E,IFNGR1,TGFB3
Induction of Apoptosis by HIV1	3.33	0.0656	-1	BIRC2,BIRC3,NFKB2,NFKBIA
Type I Diabetes Mellitus Signaling	3.27	0.0446	#NUM!	HLA-A,HLA-E,IFNGR1,NFKB2,NFKBIA
Virus Entry via Endocytic Pathways	3.26	0.0442	#NUM!	ACTG1,B2M,HLA-A,HLA-E,ITGA3
Cardiac Hypertrophy Signaling	3.15	0.0281	2.646	ADSS2,HSPB1,IGF1,MYL12A,MYL12B,RHOC,TGFB3
Granulocyte Adhesion and Diapedesis	3.13	0.033	#NUM!	CLDN4,CLDN7,CXCL16,EZR,ITGA3,SDC4
Protein Kinase A Signaling	3.12	0.0219	-0.378	MYL12A,MYL12B,NFKB2,NFKBIA,PTP4A1,SFN,SIRPA,TGFB3,YWHAH
Glioma Invasiveness Signaling	3	0.0533	0	CD44,RHOC,TIMP2,TIMP3
Cytotoxic T Lymphocyte-mediated Apoptosis of Target Cells	2.98	0.0882	#NUM!	B2M,HLA-A,HLA-E
IL-17A Signaling in Fibroblasts	2.94	0.0857	#NUM!	CEBPB,NFKB2,NFKBIA
Hepatic Cholestasis	2.92	0.03	#NUM!	CD14,LTB,NFKB2,NFKBIA,SLCO3A1,TGFB3
MIF-mediated Glucocorticoid Regulation	2.91	0.0833	#NUM!	CD14,NFKB2,NFKBIA
Inhibition of Matrix Metalloproteases	2.77	0.075	#NUM!	HSPG2,TIMP2,TIMP3
Phenylalanine Degradation I (Aerobic)	2.74	0.182	#NUM!	NAD ,PAH
Aryl Hydrocarbon Receptor Signaling	2.72	0.0336	#NUM!	ALDH1A1,HSP90AA1,HSPB1,NFKB2,TGFB3
RANK Signaling in Osteoclasts	2.72	0.0449	#NUM!	BIRC2,BIRC3,NFKB2,NFKBIA
Dopamine Degradation	2.65	0.0682	#NUM!	ALDH1A1,COMT,NAD
Role of Osteoblasts, Osteoclasts and Chondrocytes in Rheumatoid Arthritis	2.65	0.0265	#NUM!	BIRC2,BIRC3,CSF1,IGF1,ITGA3,NFKBIA
MIF Regulation of Innate Immunity	2.63	0.0667	#NUM!	CD14,NFKB2,NFKBIA
BAG2 Signaling Pathway	2.63	0.0667	#NUM!	ANXA2,HSP90AA1,NFKB2
Regulation of Actin-based Motility by Rho	2.6	0.0417	2	ITGA3,MYL12A,MYL12B,RHOC
FAT10 Cancer Signaling Pathway	2.6	0.0652	#NUM!	NFKB2,NFKBIA,TGFB3
Molecular Mechanisms of Cancer	2.59	0.0201	#NUM!	BIRC2,BIRC3,CTNNA1,ITGA3,NFKB2,NFKBIA,RHOC,TGFB3
L-DOPA Degradation	2.59	0.154	#NUM!	COMT,NAD
HMGB1 Signaling	2.53	0.0303	2	IFNGR1,LTB,NFKB2,RHOC,TGFB3
Noradrenaline and Adrenaline Degradation	2.45	0.0577	#NUM!	ALDH1A1,COMT,NAD
IGF-1 Signaling	2.44	0.0377	#NUM!	IGF1,IGFBP7,SFN,YWHAH
Germ Cell-Sertoli Cell Junction Signaling	2.43	0.0287	#NUM!	ACTG1,CTNNA1,ITGA3,RHOC,TGFB3
Systemic Lupus Erythematosus In T Cell Signaling Pathway	2.38	0.0205	1.89	B2M,CD44,ELF1,EZR,HLA-A,HLA-E,RHOC
Acute Phase Response Signaling	2.36	0.0276	2.236	CEBPB,CP,IL6ST,NFKB2,NFKBIA
Phospholipase C Signaling	2.31	0.0226	2.449	AHNAK,ITGA3,MYL12A,MYL12B,NFKB2,RHOC
Role of PKR in Interferon Induction and Antiviral Response	2.28	0.0339	0	HSP90AA1,IFNGR1,NFKB2,NFKBIA
ILK Signaling	2.25	0.026	2.236	ACTG1,KRT18,MYH9,NFKB2,RHOC
Production of Nitric Oxide and Reactive Oxygen Species in Macrophages	2.23	0.0258	2.236	IFNGR1,NFKB2,NFKBIA,RHOC,SIRPA
Inhibition of ARE-Mediated mRNA Degradation Pathway	2.23	0.0328	1	LTB,SFN,YWHAH,ZFP36L1
PPARα/RXRα Activation	2.22	0.0256	-1	BCL3,HSP90AA1,NFKB2,NFKBIA,TGFB3
Activation of IRF by Cytosolic Pattern Recognition Receptors	2.21	0.0476	#NUM!	ISG15,NFKB2,NFKBIA
Systemic Lupus Erythematosus In B Cell Signaling Pathway	2.2	0.0214	2.449	IFNGR1,IL6ST,ISG15,LTB,NFKB2,TGFB3
Senescence Pathway	2.2	0.0214	1.633	CEBPB,ELF1,GADD45B,NFKB2,TGFB3,ZFP36L1
Gα12/13 Signaling	2.12	0.0305	#NUM!	MYL12A,MYL12B,NFKB2,NFKBIA
Semaphorin Neuronal Repulsive Signaling Pathway	2.11	0.0303	1	CD44,ITGA3,MYL12A,MYL12B
Fatty Acid α-oxidation	2.1	0.087	#NUM!	ALDH1A1,NAD
IL-12 Signaling and Production in Macrophages	2.06	0.0294	#NUM!	CEBPB,IFNGR1,NFKB2,TGFB3
Role of JAK1, JAK2 and TYK2 in Interferon Signaling	2.06	0.0833	#NUM!	IFNGR1,NFKB2
Integrin Signaling	2.05	0.0234	2.236	ACTG1,ITGA3,MYL12A,MYL12B,RHOC
IL-10 Signaling	2.04	0.0411	#NUM!	CD14,NFKB2,NFKBIA
ERK5 Signaling	2.04	0.0411	#NUM!	IL6ST,SFN,YWHAH
T Helper Cell Differentiation	2.02	0.0405	#NUM!	HLA-A,IFNGR1,IL6ST
Small Cell Lung Cancer Signaling	2.02	0.0405	#NUM!	BIRC2,NFKB2,NFKBIA
Hypoxia Signaling in the Cardiovascular System	2.02	0.0405	#NUM!	EDN1,HSP90AA1,NFKBIA
Cardiac Hypertrophy Signaling (Enhanced)	2.02	0.016	2.646	EDN1,HSPB1,IGF1,IL6ST,ITGA3,LTB,NFKB2,TGFB3
Cellular Effects of Sildenafil (Viagra)	1.98	0.0278	#NUM!	ACTG1,MYH9,MYL12A,MYL12B
Toll-like Receptor Signaling	1.97	0.039	#NUM!	CD14,NFKB2,NFKBIA
LPS-stimulated MAPK Signaling	1.9	0.0366	#NUM!	CD14,NFKB2,NFKBIA
PEDF Signaling	1.9	0.0366	#NUM!	NFKB2,NFKBIA,WASF2
NF-κB Activation by Viruses	1.89	0.0361	#NUM!	ITGA3,NFKB2,NFKBIA
Histamine Degradation	1.84	0.0645	#NUM!	ALDH1A1,NAD
Oxidative Ethanol Degradation III	1.84	0.0645	#NUM!	ALDH1A1,NAD
HIPPO signaling	1.84	0.0349	#NUM!	CD44,SFN,YWHAH
Xenobiotic Metabolism AHR Signaling Pathway	1.84	0.0349	#NUM!	ALDH1A1,HSP90AA1,NFKB2
Allograft Rejection Signaling	1.83	0.0345	#NUM!	B2M,HLA-A,HLA-E
4-1BB Signaling in T Lymphocytes	1.82	0.0625	#NUM!	NFKB2,NFKBIA
HOTAIR Regulatory Pathway	1.81	0.0247	1	CD44,NFKB2,NFKBIA,RHOC
CTLA4 Signaling in Cytotoxic T Lymphocytes	1.8	0.0337	#NUM!	B2M,HLA-A,HLA-E
IL-9 Signaling	1.79	0.0606	#NUM!	BCL3,NFKB2
Putrescine Degradation III	1.79	0.0606	#NUM!	ALDH1A1,NAD
Regulation of IL-2 Expression in Activated and Anergic T Lymphocytes	1.78	0.033	#NUM!	NFKB2,NFKBIA,TGFB3
Ethanol Degradation IV	1.77	0.0588	#NUM!	ALDH1A1,NAD
Tec Kinase Signaling	1.76	0.024	2	ACTG1,ITGA3,NFKB2,RHOC
Tryptophan Degradation X (Mammalian, via Tryptamine)	1.74	0.0571	#NUM!	ALDH1A1,NAD
Colorectal Cancer Metastasis Signaling	1.73	0.0194	2	IFNGR1,IL6ST,NFKB2,RHOC,TGFB3
Prostate Cancer Signaling	1.73	0.0316	#NUM!	HSP90AA1,NFKB2,NFKBIA
Interferon Signaling	1.72	0.0556	#NUM!	IFNGR1,ISG15
Communication between Innate and Adaptive Immune Cells	1.71	0.0309	#NUM!	B2M,HLA-A,HLA-E
PAK Signaling	1.68	0.0303	#NUM!	ITGA3,MYL12A,MYL12B
Retinoate Biosynthesis I	1.68	0.0526	#NUM!	ALDH1A1,NAD
April Mediated Signaling	1.66	0.0513	#NUM!	NFKB2,NFKBIA
Inhibition of Angiogenesis by TSP1	1.66	0.0513	#NUM!	CD47,HSPG2
PPAR Signaling	1.63	0.0288	#NUM!	HSP90AA1,NFKB2,NFKBIA
B Cell Activating Factor Signaling	1.61	0.0488	#NUM!	NFKB2,NFKBIA
Mechanisms of Viral Exit from Host Cells	1.61	0.0488	#NUM!	ACTG1,CHMP2B
Purine Nucleotides De Novo Biosynthesis II	1.61	0.0488	#NUM!	ADSS2,NAD
Amyotrophic Lateral Sclerosis Signaling	1.61	0.0283	#NUM!	BIRC2,BIRC3,IGF1
Role of IL-17F in Allergic Inflammatory Airway Diseases	1.6	0.0476	#NUM!	IGF1,NFKB2
Ethanol Degradation II	1.6	0.0476	#NUM!	ALDH1A1,NAD
Oncostatin M Signaling	1.58	0.0465	#NUM!	IL6ST,TIMP3
Sumoylation Pathway	1.57	0.0275	#NUM!	NFKB2,NFKBIA,RHOC
Role of RIG1-like Receptors in Antiviral Innate Immunity	1.56	0.0455	#NUM!	NFKB2,NFKBIA
IL-23 Signaling Pathway	1.56	0.0455	#NUM!	NFKB2,NFKBIA
Sorbitol Degradation I	1.54	0.2	#NUM!	NAD
ERK/MAPK Signaling	1.53	0.0203	#NUM!	ELF1,HSPB1,ITGA3,YWHAH
Rac Signaling	1.51	0.0261	#NUM!	CD44,ITGA3,NFKB2
RAR Activation	1.51	0.0199	#NUM!	ALDH1A1,NFKB2,RELB,TGFB3
iCOS-iCOSL Signaling in T Helper Cells	1.5	0.0259	#NUM!	HLA-A,NFKB2,NFKBIA
Natural Killer Cell Signaling	1.5	0.0198	-1	B2M,HLA-A,HLA-E,NFKB2
Role of Tissue Factor in Cancer	1.48	0.0252	#NUM!	CSF1,F3,ITGA3
Graft-versus-Host Disease Signaling	1.47	0.0408	#NUM!	HLA-A,HLA-E
Cell Cycle: G2/M DNA Damage Checkpoint Regulation	1.47	0.0408	#NUM!	SFN,YWHAH
Glycine Biosynthesis II	1.46	0.167	#NUM!	NAD
Autoimmune Thyroid Disease Signaling	1.44	0.0392	#NUM!	HLA-A,HLA-E
CD28 Signaling in T Helper Cells	1.42	0.024	#NUM!	HLA-A,NFKB2,NFKBIA
Thrombin Signaling	1.42	0.0187	#NUM!	MYL12A,MYL12B,NFKB2,RHOC
CD27 Signaling in Lymphocytes	1.41	0.0377	#NUM!	NFKB2,NFKBIA
Atherosclerosis Signaling	1.4	0.0234	#NUM!	CSF1,F3,NFKB2
PTEN Signaling	1.4	0.0234	#NUM!	ITGA3,NFKB2,YWHAH
Role of Macrophages, Fibroblasts and Endothelial Cells in Rheumatoid Arthritis	1.4	0.0157	#NUM!	CEBPB,CSF1,IL6ST,LTB,NFKBIA
UDP-D-xylose and UDP-D-glucuronate Biosynthesis	1.39	0.143	#NUM!	NAD
Choline Degradation I	1.39	0.143	#NUM!	NAD
Glycerol-3-phosphate Shuttle	1.39	0.143	#NUM!	NAD
Tyrosine Biosynthesis IV	1.39	0.143	#NUM!	PAH
Role of IL-17A in Arthritis	1.37	0.0357	#NUM!	NFKB2,NFKBIA
Retinoate Biosynthesis II	1.34	0.125	#NUM!	NAD
Proline Degradation	1.34	0.125	#NUM!	NAD
Taurine Biosynthesis	1.34	0.125	#NUM!	NAD
MSP-RON Signaling Pathway	1.33	0.0339	#NUM!	ACTG1,CSF1
Estrogen Receptor Signaling	1.32	0.015	2	HSP90AA1,IGF1,MYL12A,MYL12B,NFKB2
PCP pathway	1.31	0.0333	#NUM!	JUNB,JUND
Branched-chain α-keto acid Dehydrogenase Complex	1.29	0.111	#NUM!	NAD
Threonine Degradation II	1.29	0.111	#NUM!	NAD
Methylglyoxal Degradation VI	1.29	0.111	#NUM!	NAD
CD40 Signaling	1.25	0.0308	#NUM!	NFKB2,NFKBIA
β-alanine Degradation I	1.24	0.1	#NUM!	NAD
Pyruvate Fermentation to Lactate	1.24	0.1	#NUM!	NAD
2-ketoglutarate Dehydrogenase Complex	1.24	0.1	#NUM!	NAD
2-amino-3-carboxymuconate Semialdehyde Degradation to Glutaryl-CoA	1.24	0.1	#NUM!	NAD
4-aminobutyrate Degradation I	1.24	0.1	#NUM!	NAD
Role of PI3K/AKT Signaling in the Pathogenesis of Influenza	1.24	0.0303	#NUM!	NFKB2,NFKBIA
IL-17A Signaling in Airway Cells	1.24	0.0303	#NUM!	NFKB2,NFKBIA
Regulation of Cellular Mechanics by Calpain Protease	1.24	0.0303	#NUM!	EZR,ITGA3
Remodeling of Epithelial Adherens Junctions	1.22	0.0294	#NUM!	ACTG1,CTNNA1
Role of Pattern Recognition Receptors in Recognition of Bacteria and Viruses	1.2	0.0195	#NUM!	LTB,NFKB2,TGFB3
Epithelial Adherens Junction Signaling	1.2	0.0195	#NUM!	ACTG1,CTNNA1,MYH9
Phenylethylamine Degradation I	1.2	0.0909	#NUM!	NAD
D-glucuronate Degradation I	1.2	0.0909	#NUM!	NAD
4-hydroxyproline Degradation I	1.2	0.0909	#NUM!	NAD
Phagosome Maturation	1.18	0.019	#NUM!	B2M,HLA-A,HLA-E
Actin Nucleation by ARP-WASP Complex	1.17	0.0278	#NUM!	ITGA3,RHOC
PKCθ Signaling in T Lymphocytes	1.17	0.0189	#NUM!	HLA-A,NFKB2,NFKBIA
Hematopoiesis from Multipotent Stem Cells	1.16	0.0833	#NUM!	CSF1
Acetyl-CoA Biosynthesis I (Pyruvate Dehydrogenase Complex)	1.16	0.0833	#NUM!	NAD
Ascorbate Recycling (Cytosolic)	1.16	0.0833	#NUM!	NAD
NAD Biosynthesis III	1.16	0.0833	#NUM!	NAD
Glutamate Degradation III (via 4-aminobutyrate)	1.16	0.0833	#NUM!	NAD
Axonal Guidance Signaling	1.15	0.0122	#NUM!	ADAM33,IGF1,ITGA3,MYL12A,MYL12B,SEMA3C
Type II Diabetes Mellitus Signaling	1.14	0.0184	#NUM!	CEBPB,NFKB2,NFKBIA
L-carnitine Biosynthesis	1.13	0.0769	#NUM!	NAD
NAD Salvage Pathway III	1.13	0.0769	#NUM!	NAD
Glycine Cleavage Complex	1.13	0.0769	#NUM!	NAD
Arginine Degradation I (Arginase Pathway)	1.13	0.0769	#NUM!	NAD
Macropinocytosis Signaling	1.13	0.0263	#NUM!	CD14,CSF1
Gαq Signaling	1.12	0.0181	#NUM!	NFKB2,NFKBIA,RHOC
Angiopoietin Signaling	1.12	0.026	#NUM!	NFKB2,NFKBIA
Aldosterone Signaling in Epithelial Cells	1.11	0.0179	#NUM!	CRYAB,HSP90AA1,HSPB1
Estrogen-Dependent Breast Cancer Signaling	1.11	0.0256	#NUM!	IGF1,NFKB2
VDR/RXR Activation	1.1	0.0253	#NUM!	CD14,CEBPB
Erythropoietin Signaling	1.1	0.0253	#NUM!	NFKB2,NFKBIA
Agrin Interactions at Neuromuscular Junction	1.1	0.0253	#NUM!	ACTG1,ITGA3
Serine Biosynthesis	1.1	0.0714	#NUM!	NAD
Aspartate Degradation II	1.1	0.0714	#NUM!	NAD
JAK/Stat Signaling	1.09	0.025	#NUM!	CEBPB,NFKB2
BEX2 Signaling Pathway	1.08	0.0247	#NUM!	NFKB2,NFKBIA
CXCR4 Signaling	1.07	0.0171	#NUM!	MYL12A,MYL12B,RHOC
Serotonin Degradation	1.06	0.0238	#NUM!	ALDH1A1,NAD
NF-κB Signaling	1.05	0.0168	#NUM!	NFKB2,NFKBIA,RELB
NAD Biosynthesis from 2-amino-3-carboxymuconate Semialdehyde	1.04	0.0625	#NUM!	NAD
4-hydroxybenzoate Biosynthesis	1.04	0.0625	#NUM!	NAD
2-oxobutanoate Degradation I	1.02	0.0588	#NUM!	NAD
Role of NFAT in Regulation of the Immune Response	1.01	0.016	#NUM!	HLA-A,NFKB2,NFKBIA
Regulation Of The Epithelial Mesenchymal Transition By Growth Factors Pathway	1	0.016	#NUM!	LTB,NFKB2,TGFB3
NRF2-mediated Oxidative Stress Response	0.996	0.0159	#NUM!	ACTG1,JUNB,JUND
Extrinsic Prothrombin Activation Pathway	0.996	0.0556	#NUM!	F3
Th17 Activation Pathway	0.983	0.0215	#NUM!	HSP90AA1,NFKB2
IL-1 Signaling	0.975	0.0213	#NUM!	NFKB2,NFKBIA
GADD45 Signaling	0.975	0.0526	#NUM!	GADD45B
Superpathway of Serine and Glycine Biosynthesis I	0.975	0.0526	#NUM!	NAD
Lysine Degradation II	0.975	0.0526	#NUM!	NAD
Ketolysis	0.975	0.0526	#NUM!	NAD
DNA damage-induced 14-3-3σ Signaling	0.975	0.0526	#NUM!	SFN
Clathrin-mediated Endocytosis Signaling	0.963	0.0153	#NUM!	ACTG1,CD2AP,IGF1
TGF-β Signaling	0.959	0.0208	#NUM!	PMEPA1,TGFB3
Ketogenesis	0.955	0.05	#NUM!	NAD
NAD Phosphorylation and Dephosphorylation	0.955	0.05	#NUM!	NAD
Salvage Pathways of Pyrimidine Deoxyribonucleotides	0.955	0.05	#NUM!	APOBEC3B
ATM Signaling	0.951	0.0206	#NUM!	GADD45B,NFKBIA
p53 Signaling	0.943	0.0204	#NUM!	GADD45B,SFN
FAK Signaling	0.943	0.0204	#NUM!	ACTG1,ITGA3
Fcγ Receptor-mediated Phagocytosis in Macrophages and Monocytes	0.932	0.02	#NUM!	ACTG1,EZR
Neuregulin Signaling	0.924	0.0198	#NUM!	HSP90AA1,ITGA3
Urate Biosynthesis/Inosine 5'-phosphate Degradation	0.914	0.0455	#NUM!	NAD
Guanosine Nucleotides Degradation III	0.914	0.0455	#NUM!	NAD
Inflammasome pathway	0.914	0.0455	#NUM!	NFKB2
Chronic Myeloid Leukemia Signaling	0.91	0.0194	#NUM!	NFKB2,TGFB3
Sirtuin Signaling Pathway	0.903	0.0123	1	GADD45B,NAD ,NDRG1,NFKB2
Apelin Cardiomyocyte Signaling Pathway	0.903	0.0192	#NUM!	MYL12A,MYL12B
Glucocorticoid Biosynthesis	0.896	0.0435	#NUM!	NAD
Mineralocorticoid Biosynthesis	0.896	0.0435	#NUM!	NAD
VEGF Signaling	0.896	0.019	#NUM!	ACTG1,SFN
Apelin Cardiac Fibroblast Signaling Pathway	0.896	0.0435	#NUM!	TGFB3
HIF1α Signaling	0.893	0.0142	#NUM!	EDN1,HSP90AA1,IGF1
Telomerase Signaling	0.883	0.0187	#NUM!	ELF1,HSP90AA1
Paxillin Signaling	0.876	0.0185	#NUM!	ACTG1,ITGA3
Role of JAK family kinases in IL-6-type Cytokine Signaling	0.863	0.04	#NUM!	IL6ST
Lysine Degradation V	0.863	0.04	#NUM!	NAD
T Cell Receptor Signaling	0.863	0.0182	#NUM!	NFKB2,NFKBIA
Pancreatic Adenocarcinoma Signaling	0.857	0.018	#NUM!	NFKB2,TGFB3
Lipid Antigen Presentation by CD1	0.848	0.0385	#NUM!	B2M
Role of NFAT in Cardiac Hypertrophy	0.848	0.0136	#NUM!	IGF1,IL6ST,TGFB3
Leucine Degradation I	0.848	0.0385	#NUM!	NAD
Methylglyoxal Degradation III	0.848	0.0385	#NUM!	NAD
Adenosine Nucleotides Degradation II	0.848	0.0385	#NUM!	NAD
Apelin Liver Signaling Pathway	0.848	0.0385	#NUM!	EDN1
HGF Signaling	0.839	0.0175	#NUM!	ELF1,ITGA3
Glutaryl-CoA Degradation	0.833	0.037	#NUM!	NAD
Antioxidant Action of Vitamin C	0.833	0.0174	#NUM!	NFKB2,NFKBIA
Androgen Biosynthesis	0.818	0.0357	#NUM!	NAD
Folate Transformations I	0.818	0.0357	#NUM!	NAD
Airway Pathology in Chronic Obstructive Pulmonary Disease	0.815	0.0169	#NUM!	LTB,TGFB3
p38 MAPK Signaling	0.815	0.0169	#NUM!	HSPB1,TGFB3
Neuroprotective Role of THOP1 in Alzheimer's Disease	0.79	0.0164	#NUM!	HLA-A,HLA-E
Th1 Pathway	0.79	0.0164	#NUM!	HLA-A,IFNGR1
fMLP Signaling in Neutrophils	0.785	0.0163	#NUM!	NFKB2,NFKBIA
NAD biosynthesis II (from tryptophan)	0.777	0.0323	#NUM!	NAD
Isoleucine Degradation I	0.777	0.0323	#NUM!	NAD
Phagosome Formation	0.775	0.016	#NUM!	ITGA3,RHOC
The Visual Cycle	0.764	0.0312	#NUM!	NAD
LXR/RXR Activation	0.759	0.0156	#NUM!	CD14,NFKB2
14-3-3-mediated Signaling	0.754	0.0155	#NUM!	SFN,YWHAH
Role of JAK2 in Hormone-like Cytokine Signaling	0.74	0.0294	#NUM!	SIRPA
Phenylalanine Degradation IV (Mammalian, via Side Chain)	0.74	0.0294	#NUM!	NAD
Coagulation System	0.728	0.0286	#NUM!	F3
NAD Salvage Pathway II	0.728	0.0286	#NUM!	NAD
Purine Nucleotides Degradation II (Aerobic)	0.728	0.0286	#NUM!	NAD
p70S6K Signaling	0.724	0.0148	#NUM!	SFN,YWHAH
Adipogenesis pathway	0.724	0.0148	#NUM!	CEBPB,KLF5
STAT3 Pathway	0.719	0.0147	#NUM!	IGF1,IL6ST
B Cell Development	0.717	0.0278	#NUM!	HLA-A
Valine Degradation I	0.717	0.0278	#NUM!	NAD
Colanic Acid Building Blocks Biosynthesis	0.717	0.0278	#NUM!	NAD
Cell Cycle Regulation by BTG Family Proteins	0.708	0.027	#NUM!	BTG2
Androgen Signaling	0.706	0.0144	#NUM!	HSP90AA1,NFKB2
Ovarian Cancer Signaling	0.695	0.0142	#NUM!	CD44,EDN1
Hereditary Breast Cancer Signaling	0.69	0.0141	#NUM!	GADD45B,SFN
Antiproliferative Role of TOB in T Cell Signaling	0.686	0.0256	#NUM!	TGFB3
PI3K Signaling in B Lymphocytes	0.686	0.014	#NUM!	NFKB2,NFKBIA
TCA Cycle II (Eukaryotic)	0.658	0.0238	#NUM!	NAD
Glycolysis I	0.658	0.0238	#NUM!	NAD
Coronavirus Pathogenesis Pathway	0.656	0.0133	#NUM!	NFKB2,NFKBIA
Fatty Acid β-oxidation I	0.633	0.0222	#NUM!	NAD
Apelin Pancreas Signaling Pathway	0.633	0.0222	#NUM!	NFKB2
Gluconeogenesis I	0.616	0.0213	#NUM!	NAD
Relaxin Signaling	0.614	0.0125	#NUM!	NFKB2,NFKBIA
Xenobiotic Metabolism Signaling	0.613	0.0103	#NUM!	ALDH1A1,HSP90AA1,NFKB2
Necroptosis Signaling Pathway	0.611	0.0124	#NUM!	BIRC2,BIRC3
Tryptophan Degradation III (Eukaryotic)	0.607	0.0208	#NUM!	NAD
Hematopoiesis from Pluripotent Stem Cells	0.6	0.0204	#NUM!	CSF1
tRNA Splicing	0.592	0.02	#NUM!	NAD
Myc Mediated Apoptosis Signaling	0.585	0.0196	#NUM!	NFKB2
Glioblastoma Multiforme Signaling	0.578	0.0118	#NUM!	IGF1,RHOC
Th1 and Th2 Activation Pathway	0.57	0.0116	#NUM!	HLA-A,IFNGR1
Bile Acid Biosynthesis, Neutral Pathway	0.564	0.0185	#NUM!	NAD
Wnt/β-catenin Signaling	0.564	0.0115	#NUM!	CD44,TGFB3
Unfolded protein response	0.55	0.0179	#NUM!	CEBPB
T Cell Exhaustion Signaling Pathway	0.547	0.0112	#NUM!	HLA-A,HLA-E
CNTF Signaling	0.544	0.0175	#NUM!	IL6ST
Semaphorin Signaling in Neurons	0.524	0.0167	#NUM!	RHOC
Xenobiotic Metabolism CAR Signaling Pathway	0.514	0.0106	#NUM!	ALDH1A1,HSP90AA1
Maturity Onset Diabetes of Young (MODY) Signaling	0.513	0.0161	#NUM!	NFKB2
Endometrial Cancer Signaling	0.513	0.0161	#NUM!	CTNNA1
PFKFB4 Signaling Pathway	0.513	0.0161	#NUM!	TGFB3
B Cell Receptor Signaling	0.511	0.0105	#NUM!	NFKB2,NFKBIA
Regulation of the Epithelial-Mesenchymal Transition Pathway	0.506	0.0104	#NUM!	NFKB2,TGFB3
Xenobiotic Metabolism PXR Signaling Pathway	0.503	0.0104	#NUM!	ALDH1A1,HSP90AA1
Wnt/Ca+ pathway	0.496	0.0154	#NUM!	NFKB2
Mitotic Roles of Polo-Like Kinase	0.491	0.0152	#NUM!	HSP90AA1
Cell Cycle: G1/S Checkpoint Regulation	0.485	0.0149	#NUM!	TGFB3
IL-8 Signaling	0.471	0.0098	#NUM!	MYL12B,RHOC
PXR/RXR Activation	0.47	0.0143	#NUM!	ALDH1A1
Calcium-induced T Lymphocyte Apoptosis	0.47	0.0143	#NUM!	HLA-A
Adrenomedullin signaling pathway	0.469	0.00976	#NUM!	CEBPB,NFKB2
Superpathway of Methionine Degradation	0.465	0.0141	#NUM!	NAD
IL-15 Signaling	0.446	0.0133	#NUM!	NFKB2
Growth Hormone Signaling	0.446	0.0133	#NUM!	IGF1
Calcium Signaling	0.445	0.00935	#NUM!	MYH9,Tpm1
TREM1 Signaling	0.441	0.0132	#NUM!	NFKB2
IL-17 Signaling	0.424	0.0125	#NUM!	CEBPB
Thyroid Cancer Signaling	0.419	0.0123	#NUM!	IGF1
Cyclins and Cell Cycle Regulation	0.419	0.0123	#NUM!	TGFB3
LPS/IL-1 Mediated Inhibition of RXR Function	0.408	0.00873	#NUM!	ALDH1A1,CD14
Prolactin Signaling	0.408	0.0119	#NUM!	CEBPB
Regulation Of The Epithelial Mesenchymal Transition In Development Pathway	0.408	0.0119	#NUM!	NFKB2
Eicosanoid Signaling	0.408	0.0119	#NUM!	PTGFR
Systemic Lupus Erythematosus Signaling	0.399	0.00858	#NUM!	HLA-A,HLA-E
BMP signaling pathway	0.399	0.0116	#NUM!	NFKB2
IL-4 Signaling	0.396	0.0115	#NUM!	HLA-A
TR/RXR Activation	0.381	0.011	#NUM!	BCL3
Dopamine Receptor Signaling	0.381	0.011	#NUM!	COMT
Ceramide Signaling	0.377	0.0109	#NUM!	NFKB2
Acute Myeloid Leukemia Signaling	0.377	0.0109	#NUM!	NFKB2
Opioid Signaling Pathway	0.349	0.00778	#NUM!	NFKB2,NFKBIA
Mouse Embryonic Stem Cell Pluripotency	0.341	0.00971	#NUM!	IL6ST
CDK5 Signaling	0.314	0.00893	#NUM!	ITGA3
Nitric Oxide Signaling in the Cardiovascular System	0.314	0.00893	#NUM!	HSP90AA1
G-Protein Coupled Receptor Signaling	0.308	0.00714	#NUM!	NFKB2,NFKBIA
Salvage Pathways of Pyrimidine Ribonucleotides	0.306	0.0087	#NUM!	APOBEC3B
Glioma Signaling	0.298	0.00847	#NUM!	IGF1
Role of NANOG in Mammalian Embryonic Stem Cell Pluripotency	0.297	0.0084	#NUM!	IL6ST
Oxidative Phosphorylation	0.297	0.0084	#NUM!	NAD
NGF Signaling	0.294	0.00833	#NUM!	NFKB2
IL-15 Production	0.292	0.00826	#NUM!	NFKB2
Sphingosine-1-phosphate Signaling	0.292	0.00826	#NUM!	RHOC
Apelin Endothelial Signaling Pathway	0.287	0.00813	#NUM!	NFKB2
Cholecystokinin/Gastrin-mediated Signaling	0.284	0.00806	#NUM!	RHOC
Renin-Angiotensin Signaling	0.277	0.00787	#NUM!	NFKB2
Reelin Signaling in Neurons	0.27	0.00769	#NUM!	ITGA3
Th2 Pathway	0.257	0.00735	#NUM!	HLA-A
P2Y Purigenic Receptor Signaling Pathway	0.255	0.0073	#NUM!	NFKB2
Human Embryonic Stem Cell Pluripotency	0.249	0.00714	#NUM!	TGFB3
White Adipose Tissue Browning Pathway	0.243	0.00699	#NUM!	CEBPB
D-myo-inositol (1,4,5,6)-Tetrakisphosphate Biosynthesis	0.232	0.00671	#NUM!	SIRPA
D-myo-inositol (3,4,5,6)-tetrakisphosphate Biosynthesis	0.232	0.00671	#NUM!	SIRPA
Factors Promoting Cardiogenesis in Vertebrates	0.228	0.00662	#NUM!	TGFB3
Iron homeostasis signaling pathway	0.227	0.00658	#NUM!	CP
Corticotropin Releasing Hormone Signaling	0.221	0.00645	#NUM!	JUND
Regulation of eIF4 and p70S6K Signaling	0.211	0.00621	#NUM!	ITGA3
3-phosphoinositide Degradation	0.208	0.00613	#NUM!	SIRPA
D-myo-inositol-5-phosphate Metabolism	0.207	0.0061	#NUM!	SIRPA
Synaptic Long Term Depression	0	0.00505	#NUM!	IGF1
Huntington's Disease Signaling	0	0.00412	#NUM!	IGF1
Mitochondrial Dysfunction	0	0.00532	#NUM!	NAD
Endothelin-1 Signaling	0	0.00493	#NUM!	EDN1
GNRH Signaling	0	0.00559	#NUM!	NFKB2
mTOR Signaling	0	0.00463	#NUM!	RHOC
AMPK Signaling	0	0.00435	#NUM!	NAD
Breast Cancer Regulation by Stathmin1	0	0.00505	#NUM!	IGF1,NFKB2,PTGFR
Gap Junction Signaling	0	0.00474	#NUM!	ACTG1
eNOS Signaling	0	0.00581	#NUM!	HSP90AA1
Superpathway of Inositol Phosphate Compounds	0	0.00446	#NUM!	SIRPA
3-phosphoinositide Biosynthesis	0	0.00559	#NUM!	SIRPA
Synaptogenesis Signaling Pathway	0	0.00313	#NUM!	SYT7
Ephrin Receptor Signaling	0	0.00546	#NUM!	ITGA3

## Sheet: DBA+ cluster 5 vs all
© 2000-2020 QIAGEN. All rights reserved.
Ingenuity Canonical Pathways	-log(p-value)	Ratio	z-score	Molecules
EIF2 Signaling	4.57	0.0402	#NUM!	ATF5,EIF1AY,EIF2S1,EIF3D,PABPC1,PPP1CA,RPL41,RPS19,RPS27L
Cell Cycle: G2/M DNA Damage Checkpoint Regulation	3.44	0.0816	#NUM!	CCNB2,CDKN1A,CKS2,YWHAH
p53 Signaling	3.22	0.051	#NUM!	BAX,CCNG1,CDK4,CDKN1A,TP53INP1
Regulation of eIF4 and p70S6K Signaling	3.1	0.0382	#NUM!	EIF1AY,EIF2S1,EIF3D,PABPC1,RPS19,RPS27L
Thioredoxin Pathway	3.01	0.286	#NUM!	TXN,TXNRD1
Antigen Presentation Pathway	2.61	0.0769	#NUM!	CANX,HLA-A,PSMB9
Aryl Hydrocarbon Receptor Signaling	2.49	0.035	-1	ALDH7A1,BAX,CDK4,CDKN1A,HSP90B1
Endocannabinoid Cancer Inhibition Pathway	2.49	0.035	-0.447	ADCY6,CDKN1A,CREB3,GNA13,NUPR1
Molecular Mechanisms of Cancer	2.22	0.0205	#NUM!	ADCY6,ARHGEF2,BAX,CDK4,CDKN1A,GNA13,JAK2,WNT4
Protein Kinase A Signaling	2.18	0.0201	0	ADCY6,CREB3,DUSP16,DUSP18,GNA13,H1-0,PPP1CA,YWHAH
Granzyme A Signaling	2.12	0.105	#NUM!	H1-0,HMGB2
GADD45 Signaling	2.12	0.105	#NUM!	CDK4,CDKN1A
SPINK1 Pancreatic Cancer Pathway	2.08	0.05	#NUM!	CELA2A,CPB1,PRSS3
Endoplasmic Reticulum Stress Pathway	2.04	0.0952	#NUM!	EIF2S1,HSP90B1
NRF2-mediated Oxidative Stress Response	1.99	0.0265	2	DNAJB13,EPHX1,GPX2,TXN,TXNRD1
Vitamin-C Transport	1.92	0.0833	#NUM!	TXN,TXNRD1
ERK5 Signaling	1.86	0.0417	#NUM!	CREB3,GNA13,YWHAH
Estrogen-mediated S-phase Entry	1.86	0.0769	#NUM!	CDK4,CDKN1A
Choline Degradation I	1.86	0.5	#NUM!	ALDH7A1
Putrescine Biosynthesis III	1.86	0.5	#NUM!	ODC1
Cyclins and Cell Cycle Regulation	1.73	0.037	#NUM!	CCNB2,CDK4,CDKN1A
Prostate Cancer Signaling	1.6	0.033	#NUM!	CDKN1A,CREB3,HSP90B1
Interferon Signaling	1.59	0.0556	#NUM!	BAX,JAK2
Estrogen Receptor Signaling	1.57	0.0183	1.342	ADCY6,CDKN1A,CREB3,GNA13,HSP90B1,JAK2
Signaling by Rho Family GTPases	1.56	0.0205	1	ARHGEF2,CYFIP1,GNA13,MAP3K21,STMN1
ATM Signaling	1.53	0.0309	#NUM!	CCNB2,CDKN1A,CREB3
VEGF Signaling	1.5	0.0303	#NUM!	EIF1AY,EIF2S1,ELAVL1
PI3K/AKT Signaling	1.47	0.0229	1	CDKN1A,HSP90B1,JAK2,YWHAH
Serine Biosynthesis	1.47	0.2	#NUM!	PHGDH
Lysine Degradation II	1.47	0.2	#NUM!	ALDH7A1
Lysine Degradation V	1.47	0.2	#NUM!	ALDH7A1
Pancreatic Adenocarcinoma Signaling	1.4	0.0275	#NUM!	CDK4,CDKN1A,JAK2
Antioxidant Action of Vitamin C	1.4	0.0275	#NUM!	JAK2,TXN,TXNRD1
Pentose Phosphate Pathway (Non-oxidative Branch)	1.39	0.167	#NUM!	RPE
Melanoma Signaling	1.33	0.04	#NUM!	CDK4,CDKN1A
Superpathway of Serine and Glycine Biosynthesis I	1.32	0.143	#NUM!	PHGDH
Role of PKR in Interferon Induction and Antiviral Response	1.32	0.0256	#NUM!	BAX,EIF2S1,HSP90B1
Airway Pathology in Chronic Obstructive Pulmonary Disease	1.27	0.125	#NUM!	CELA2A
Unfolded protein response	1.24	0.0357	#NUM!	CANX,HSP90B1
mTOR Signaling	1.24	0.019	#NUM!	EIF3D,MAPKAP1,RPS19,RPS27L
PCP pathway	1.19	0.0333	#NUM!	PFN1,WNT4
Pentose Phosphate Pathway	1.17	0.1	#NUM!	RPE
STAT3 Pathway	1.17	0.0222	#NUM!	CDKN1A,JAK2,MAP3K21
Systemic Lupus Erythematosus Signaling	1.13	0.0175	#NUM!	HLA-A,LSM1,LSM6,SNRNP70
Mitotic Roles of Polo-Like Kinase	1.12	0.0303	#NUM!	CCNB2,HSP90B1
Cell Cycle: G1/S Checkpoint Regulation	1.11	0.0299	#NUM!	CDK4,CDKN1A
Mineralocorticoid Biosynthesis	1.1	0.0833	#NUM!	EBP
SPINK1 General Cancer Pathway	1.08	0.029	#NUM!	JAK2,PRSS3
Glucocorticoid Receptor Signaling	1.07	0.0149	#NUM!	CDKN1A,HSP90B1,JAK2,KRT19,YWHAH
Fatty Acid Activation	1.06	0.0769	#NUM!	ACSL5
Cholesterol Biosynthesis I	1.06	0.0769	#NUM!	EBP
Cholesterol Biosynthesis II (via 24,25-dihydrolanosterol)	1.06	0.0769	#NUM!	EBP
Cholesterol Biosynthesis III (via Desmosterol)	1.06	0.0769	#NUM!	EBP
Glucocorticoid Biosynthesis	1.06	0.0769	#NUM!	EBP
Phagosome Maturation	1.06	0.0199	#NUM!	CANX,DYNLL1,HLA-A
Caveolar-mediated Endocytosis Signaling	1.04	0.0274	#NUM!	COPG1,HLA-A
Leptin Signaling in Obesity	1.03	0.027	#NUM!	ADCY6,JAK2
Hypoxia Signaling in the Cardiovascular System	1.03	0.027	#NUM!	CREB3,HSP90B1
Colorectal Cancer Metastasis Signaling	1	0.0158	1	ADCY6,BAX,JAK2,WNT4
Dopamine Receptor Signaling	1	0.026	#NUM!	ADCY6,PPP1CA
HOTAIR Regulatory Pathway	1	0.0187	#NUM!	CDKN1A,ELAVL1,WNT4
Phospholipase C Signaling	0.987	0.0156	#NUM!	ADCY6,ARHGEF2,CREB3,GNA13
Dopamine-DARPP32 Feedback in cAMP Signaling	0.983	0.0184	#NUM!	ADCY6,CREB3,PPP1CA
BEX2 Signaling Pathway	0.983	0.0253	#NUM!	CDKN1A,LGALS1
Chondroitin Sulfate Degradation (Metazoa)	0.979	0.0625	#NUM!	HEXB
Androgen Biosynthesis	0.979	0.0625	#NUM!	EBP
JAK/Stat Signaling	0.975	0.025	#NUM!	CDKN1A,JAK2
Glioblastoma Multiforme Signaling	0.971	0.0182	#NUM!	CDK4,CDKN1A,WNT4
Apelin Adipocyte Signaling Pathway	0.959	0.0244	#NUM!	ADCY6,GPX2
γ-linolenate Biosynthesis II (Animals)	0.955	0.0588	#NUM!	ACSL5
Dermatan Sulfate Degradation (Metazoa)	0.955	0.0588	#NUM!	HEXB
Mitochondrial L-carnitine Shuttle Pathway	0.955	0.0588	#NUM!	ACSL5
D-myo-inositol (1,4,5)-trisphosphate Degradation	0.955	0.0588	#NUM!	SEC16A
Histamine Degradation	0.955	0.0588	#NUM!	ALDH7A1
1D-myo-inositol Hexakisphosphate Biosynthesis II (Mammalian)	0.932	0.0556	#NUM!	SEC16A
D-myo-inositol (1,3,4)-trisphosphate Biosynthesis	0.932	0.0556	#NUM!	SEC16A
HIPPO signaling	0.932	0.0235	#NUM!	PPP1CA,YWHAH
IL-4 Signaling	0.932	0.0235	#NUM!	HLA-A,JAK2
Protein Ubiquitination Pathway	0.917	0.0147	#NUM!	DNAJB13,HLA-A,HSP90B1,PSMB9
Oxidative Ethanol Degradation III	0.907	0.0526	#NUM!	ALDH7A1
DNA damage-induced 14-3-3σ Signaling	0.907	0.0526	#NUM!	CCNB2
Senescence Pathway	0.907	0.0145	0	CCNB2,CDK4,CDKN1A,PPP1CA
CTLA4 Signaling in Cytotoxic T Lymphocytes	0.9	0.0225	#NUM!	HLA-A,JAK2
Ephrin Receptor Signaling	0.889	0.0167	#NUM!	CREB3,GNA13,JAK2
CDP-diacylglycerol Biosynthesis I	0.886	0.05	#NUM!	AGPAT3
Fatty Acid α-oxidation	0.886	0.05	#NUM!	ALDH7A1
IL-1 Signaling	0.883	0.022	#NUM!	ADCY6,GNA13
Th17 Activation Pathway	0.883	0.022	#NUM!	HSP90B1,JAK2
Dendritic Cell Maturation	0.873	0.0164	#NUM!	CREB3,HLA-A,JAK2
Putrescine Degradation III	0.866	0.0476	#NUM!	ALDH7A1
Melanocyte Development and Pigmentation Signaling	0.86	0.0213	#NUM!	ADCY6,CREB3
Polyamine Regulation in Colon Cancer	0.848	0.0455	#NUM!	ODC1
Phosphatidylglycerol Biosynthesis II (Non-plastidic)	0.848	0.0455	#NUM!	AGPAT3
Methionine Degradation I (to Homocysteine)	0.848	0.0455	#NUM!	MGMT
PPARα/RXRα Activation	0.839	0.0158	#NUM!	ADCY6,HSP90B1,JAK2
Bladder Cancer Signaling	0.839	0.0206	#NUM!	CDK4,CDKN1A
Superpathway of D-myo-inositol (1,4,5)-trisphosphate Metabolism	0.83	0.0435	#NUM!	SEC16A
Ethanol Degradation IV	0.83	0.0435	#NUM!	ALDH7A1
Xenobiotic Metabolism PXR Signaling Pathway	0.83	0.0156	#NUM!	ALDH7A1,HSP90B1,PPP1CA
ERK/MAPK Signaling	0.824	0.0155	#NUM!	CREB3,PPP1CA,YWHAH
Tumoricidal Function of Hepatic Natural Killer Cells	0.815	0.0417	#NUM!	BAX
Role of JAK1, JAK2 and TYK2 in Interferon Signaling	0.815	0.0417	#NUM!	JAK2
Glutathione Redox Reactions I	0.815	0.0417	#NUM!	GPX2
Cysteine Biosynthesis III (mammalia)	0.815	0.0417	#NUM!	MGMT
Superpathway of Inositol Phosphate Compounds	0.801	0.0152	#NUM!	DUSP16,PPP1CA,SEC16A
Chronic Myeloid Leukemia Signaling	0.799	0.0194	#NUM!	CDK4,CDKN1A
Role of JAK family kinases in IL-6-type Cytokine Signaling	0.799	0.04	#NUM!	JAK2
Tryptophan Degradation X (Mammalian, via Tryptamine)	0.799	0.04	#NUM!	ALDH7A1
IGF-1 Signaling	0.79	0.0192	#NUM!	JAK2,YWHAH
Lipid Antigen Presentation by CD1	0.783	0.0385	#NUM!	CANX
PD-1, PD-L1 cancer immunotherapy pathway	0.777	0.0189	#NUM!	HLA-A,JAK2
Telomerase Signaling	0.772	0.0187	#NUM!	CDKN1A,HSP90B1
Gαs Signaling	0.772	0.0187	#NUM!	ADCY6,CREB3
Role of Macrophages, Fibroblasts and Endothelial Cells in Rheumatoid Arthritis	0.767	0.0128	#NUM!	CREB3,JAK2,PRSS3,WNT4
CDK5 Signaling	0.764	0.0185	#NUM!	ADCY6,PPP1CA
CREB Signaling in Neurons	0.762	0.0145	#NUM!	ADCY6,CREB3,GNA13
Thrombin Signaling	0.757	0.0144	#NUM!	ADCY6,ARHGEF2,GNA13
Glioma Signaling	0.752	0.0182	#NUM!	CDK4,CDKN1A
Type I Diabetes Mellitus Signaling	0.747	0.018	#NUM!	HLA-A,JAK2
Superpathway of Cholesterol Biosynthesis	0.74	0.0345	#NUM!	EBP
AMPK Signaling	0.733	0.014	#NUM!	CDKN1A,CREB3,ELAVL1
NGF Signaling	0.73	0.0175	#NUM!	BAX,CREB3
Dopamine Degradation	0.726	0.0333	#NUM!	ALDH7A1
Endocannabinoid Developing Neuron Pathway	0.724	0.0174	#NUM!	ADCY6,CREB3
Apelin Endothelial Signaling Pathway	0.724	0.0174	#NUM!	ADCY6,GNA13
Actin Cytoskeleton Signaling	0.717	0.0138	#NUM!	CYFIP1,GNA13,PFN1
G Protein Signaling Mediated by Tubby	0.712	0.0323	#NUM!	JAK2
Sphingosine-1-phosphate Signaling	0.712	0.0171	#NUM!	ADCY6,GNA13
Neuroprotective Role of THOP1 in Alzheimer's Disease	0.712	0.0171	#NUM!	HLA-A,PRSS3
Role of Tissue Factor in Cancer	0.712	0.0171	#NUM!	GNA13,JAK2
Renin-Angiotensin Signaling	0.708	0.0169	#NUM!	ADCY6,JAK2
Role of NANOG in Mammalian Embryonic Stem Cell Pluripotency	0.701	0.0168	#NUM!	JAK2,WNT4
Ethanol Degradation II	0.701	0.0312	#NUM!	ALDH7A1
Fatty Acid β-oxidation I	0.701	0.0312	#NUM!	ACSL5
LPS/IL-1 Mediated Inhibition of RXR Function	0.695	0.0134	#NUM!	ACSL5,ALDH7A1,MGMT
Th1 Pathway	0.69	0.0165	#NUM!	HLA-A,JAK2
Circadian Rhythm Signaling	0.688	0.0303	#NUM!	CREB3
RhoA Signaling	0.68	0.0163	#NUM!	GNA13,PFN1
Cytotoxic T Lymphocyte-mediated Apoptosis of Target Cells	0.678	0.0294	#NUM!	HLA-A
Inhibition of Angiogenesis by TSP1	0.678	0.0294	#NUM!	HSPG2
Role of JAK2 in Hormone-like Cytokine Signaling	0.678	0.0294	#NUM!	JAK2
Noradrenaline and Adrenaline Degradation	0.666	0.0286	#NUM!	ALDH7A1
PTEN Signaling	0.664	0.0159	#NUM!	CDKN1A,YWHAH
14-3-3-mediated Signaling	0.66	0.0157	#NUM!	BAX,YWHAH
P2Y Purigenic Receptor Signaling Pathway	0.66	0.0157	#NUM!	ADCY6,CREB3
B Cell Development	0.656	0.0278	#NUM!	HLA-A
Synaptic Long Term Potentiation	0.65	0.0155	#NUM!	CREB3,PPP1CA
White Adipose Tissue Browning Pathway	0.65	0.0155	#NUM!	ADCY6,CREB3
Breast Cancer Regulation by Stathmin1	0.646	0.0102	#NUM!	ARHGEF2,CDK4,CREB3,GNA13,PPP1CA,STMN1
Cell Cycle Regulation by BTG Family Proteins	0.644	0.027	#NUM!	CDK4
Superpathway of Methionine Degradation	0.644	0.027	#NUM!	MGMT
Docosahexaenoic Acid (DHA) Signaling	0.635	0.0263	#NUM!	BAX
Antiproliferative Role of TOB in T Cell Signaling	0.625	0.0256	#NUM!	PABPC1
Inhibition of Matrix Metalloproteases	0.625	0.0256	#NUM!	HSPG2
Th2 Pathway	0.616	0.0147	#NUM!	HLA-A,JAK2
Mechanisms of Viral Exit from Host Cells	0.606	0.0244	#NUM!	CHMP4B
Ovarian Cancer Signaling	0.602	0.0144	#NUM!	CDK4,WNT4
Hereditary Breast Cancer Signaling	0.599	0.0143	#NUM!	CDK4,CDKN1A
Insulin Receptor Signaling	0.599	0.0143	#NUM!	JAK2,PPP1CA
Role of IL-17F in Allergic Inflammatory Airway Diseases	0.597	0.0238	#NUM!	CREB3
Triacylglycerol Biosynthesis	0.597	0.0238	#NUM!	AGPAT3
D-myo-inositol (1,4,5,6)-Tetrakisphosphate Biosynthesis	0.593	0.0142	#NUM!	DUSP16,PPP1CA
D-myo-inositol (3,4,5,6)-tetrakisphosphate Biosynthesis	0.593	0.0142	#NUM!	DUSP16,PPP1CA
Cardiac β-adrenergic Signaling	0.593	0.0142	#NUM!	ADCY6,PPP1CA
Oncostatin M Signaling	0.588	0.0233	#NUM!	JAK2
Serotonin Receptor Signaling	0.588	0.0233	#NUM!	ADCY6
BAG2 Signaling Pathway	0.588	0.0233	#NUM!	CDKN1A
IL-23 Signaling Pathway	0.58	0.0227	#NUM!	JAK2
Corticotropin Releasing Hormone Signaling	0.577	0.0138	#NUM!	ADCY6,CREB3
iNOS Signaling	0.572	0.0222	#NUM!	JAK2
PFKFB4 Signaling Pathway	0.564	0.0217	#NUM!	CREB3
Relaxin Signaling	0.556	0.0133	#NUM!	ADCY6,GNA13
Factors Promoting Cardiogenesis in Vertebrates	0.556	0.0133	#NUM!	CREB3,WNT4
Stearate Biosynthesis I (Animals)	0.556	0.0213	#NUM!	ACSL5
Graft-versus-Host Disease Signaling	0.548	0.0208	#NUM!	HLA-A
Autoimmune Thyroid Disease Signaling	0.541	0.0204	#NUM!	HLA-A
3-phosphoinositide Degradation	0.536	0.0129	#NUM!	DUSP16,PPP1CA
Myc Mediated Apoptosis Signaling	0.533	0.02	#NUM!	BAX
D-myo-inositol-5-phosphate Metabolism	0.533	0.0128	#NUM!	DUSP16,PPP1CA
Aldosterone Signaling in Epithelial Cells	0.526	0.0127	#NUM!	DNAJB13,HSP90B1
eNOS Signaling	0.521	0.0126	#NUM!	ADCY6,HSP90B1
Tec Kinase Signaling	0.503	0.0122	#NUM!	GNA13,JAK2
3-phosphoinositide Biosynthesis	0.5	0.0121	#NUM!	DUSP16,PPP1CA
Xenobiotic Metabolism Signaling	0.496	0.0105	#NUM!	ALDH7A1,HSP90B1,MGMT
CXCR4 Signaling	0.493	0.012	#NUM!	ADCY6,GNA13
Cell Cycle Control of Chromosomal Replication	0.492	0.0179	#NUM!	CDK4
Tight Junction Signaling	0.489	0.0119	#NUM!	ARHGEF2,CDK4
CNTF Signaling	0.485	0.0175	#NUM!	JAK2
Role of CHK Proteins in Cell Cycle Checkpoint Control	0.485	0.0175	#NUM!	CDKN1A
Th1 and Th2 Activation Pathway	0.48	0.0117	#NUM!	HLA-A,JAK2
MSP-RON Signaling Pathway	0.479	0.0172	#NUM!	JAK2
GNRH Signaling	0.474	0.0116	#NUM!	ADCY6,CREB3
Nur77 Signaling in T Lymphocytes	0.474	0.0169	#NUM!	HLA-A
T Cell Exhaustion Signaling Pathway	0.467	0.0114	#NUM!	HLA-A,JAK2
Neuroinflammation Signaling Pathway	0.463	0.01	#NUM!	CREB3,HLA-A,JAK2
Induction of Apoptosis by HIV1	0.462	0.0164	#NUM!	BAX
Wnt/Ca+ pathway	0.456	0.0161	#NUM!	CREB3
Thrombopoietin Signaling	0.451	0.0159	#NUM!	JAK2
RhoGDI Signaling	0.451	0.0111	#NUM!	ARHGEF2,GNA13
Role of NFAT in Regulation of the Immune Response	0.447	0.011	#NUM!	GNA13,HLA-A
IL-17A Signaling in Airway Cells	0.44	0.0154	#NUM!	JAK2
Pyridoxal 5'-phosphate Salvage Pathway	0.44	0.0154	#NUM!	CDK4
Regulation of Cellular Mechanics by Calpain Protease	0.44	0.0154	#NUM!	CDK4
Calcium-induced T Lymphocyte Apoptosis	0.434	0.0152	#NUM!	HLA-A
Serotonin Degradation	0.429	0.0149	#NUM!	ALDH7A1
Endothelin-1 Signaling	0.427	0.0106	#NUM!	ADCY6,GNA13
Production of Nitric Oxide and Reactive Oxygen Species in Macrophages	0.427	0.0106	#NUM!	JAK2,PPP1CA
Xenobiotic Metabolism CAR Signaling Pathway	0.425	0.0106	#NUM!	ALDH7A1,HSP90B1
Role of JAK1 and JAK3 in γc Cytokine Signaling	0.419	0.0145	#NUM!	JAK2
Regulation of the Epithelial-Mesenchymal Transition Pathway	0.416	0.0104	#NUM!	JAK2,WNT4
GM-CSF Signaling	0.415	0.0143	#NUM!	JAK2
RAR Activation	0.41	0.0103	#NUM!	ADCY6,JAK2
Growth Hormone Signaling	0.41	0.0141	#NUM!	JAK2
Small Cell Lung Cancer Signaling	0.41	0.0141	#NUM!	CDK4
Basal Cell Carcinoma Signaling	0.405	0.0139	#NUM!	WNT4
Ephrin B Signaling	0.405	0.0139	#NUM!	GNA13
Natural Killer Cell Signaling	0.402	0.0102	#NUM!	HLA-A,JAK2
Adrenomedullin signaling pathway	0.402	0.0102	#NUM!	ADCY6,BAX
T Helper Cell Differentiation	0.4	0.0137	#NUM!	HLA-A
Non-Small Cell Lung Cancer Signaling	0.4	0.0137	#NUM!	CDK4
GPCR-Mediated Integration of Enteroendocrine Signaling Exemplified by an L Cell	0.4	0.0137	#NUM!	ADCY6
Estrogen-Dependent Breast Cancer Signaling	0.396	0.0135	#NUM!	CREB3
IL-8 Signaling	0.395	0.01	#NUM!	BAX,GNA13
Systemic Lupus Erythematosus In T Cell Signaling Pathway	0.393	0.00901	#NUM!	CREB3,GNA13,HLA-A
TREM1 Signaling	0.391	0.0133	#NUM!	JAK2
IL-15 Signaling	0.391	0.0133	#NUM!	JAK2
Erythropoietin Signaling	0.387	0.0132	#NUM!	JAK2
Neurotrophin/TRK Signaling	0.387	0.0132	#NUM!	CREB3
Antiproliferative Role of Somatostatin Receptor 2	0.383	0.013	#NUM!	CDKN1A
VDR/RXR Activation	0.379	0.0128	#NUM!	CDKN1A
Role of Wnt/GSK-3β Signaling in the Pathogenesis of Influenza	0.379	0.0128	#NUM!	WNT4
IL-7 Signaling Pathway	0.379	0.0128	#NUM!	BAX
IL-3 Signaling	0.375	0.0127	#NUM!	JAK2
Role of BRCA1 in DNA Damage Response	0.371	0.0125	#NUM!	CDKN1A
IL-17 Signaling	0.371	0.0125	#NUM!	JAK2
FLT3 Signaling in Hematopoietic Progenitor Cells	0.371	0.0125	#NUM!	CREB3
Role of MAPK Signaling in the Pathogenesis of Influenza	0.371	0.0125	#NUM!	BAX
Prolactin Signaling	0.367	0.0123	#NUM!	JAK2
Cardiac Hypertrophy Signaling (Enhanced)	0.361	0.00821	2	ADCY6,GNA13,JAK2,WNT4
TR/RXR Activation	0.355	0.0119	#NUM!	STRBP
HER-2 Signaling in Breast Cancer	0.355	0.0119	#NUM!	CDKN1A
FGF Signaling	0.355	0.0119	#NUM!	CREB3
Allograft Rejection Signaling	0.347	0.0116	#NUM!	HLA-A
PDGF Signaling	0.347	0.0116	#NUM!	JAK2
Crosstalk between Dendritic Cells and Natural Killer Cells	0.336	0.0112	#NUM!	HLA-A
Altered T Cell and B Cell Signaling in Rheumatoid Arthritis	0.333	0.0111	#NUM!	HLA-A
OX40 Signaling Pathway	0.333	0.0111	#NUM!	HLA-A
cAMP-mediated signaling	0.329	0.00877	#NUM!	ADCY6,CREB3
Hepatic Fibrosis Signaling Pathway	0.329	0.00815	#NUM!	CREB3,JAK2,WNT4
Regulation of Actin-based Motility by Rho	0.319	0.0106	#NUM!	PFN1
GABA Receptor Signaling	0.316	0.0105	#NUM!	ADCY6
Neuregulin Signaling	0.312	0.0104	#NUM!	HSP90B1
α-Adrenergic Signaling	0.312	0.0104	#NUM!	ADCY6
Communication between Innate and Adaptive Immune Cells	0.312	0.0104	#NUM!	HLA-A
Huntington's Disease Signaling	0.311	0.00844	#NUM!	BAX,CREB3
Amyotrophic Lateral Sclerosis Signaling	0.309	0.0103	#NUM!	BAX
Salvage Pathways of Pyrimidine Ribonucleotides	0.309	0.0103	#NUM!	CDK4
Cardiac Hypertrophy Signaling	0.305	0.00833	#NUM!	ADCY6,GNA13
Nitric Oxide Signaling in the Cardiovascular System	0.303	0.0101	#NUM!	HSP90B1
Apoptosis Signaling	0.303	0.0101	#NUM!	BAX
SAPK/JNK Signaling	0.294	0.0098	#NUM!	GNA13
Mouse Embryonic Stem Cell Pluripotency	0.292	0.00971	#NUM!	JAK2
Opioid Signaling Pathway	0.292	0.0081	#NUM!	ADCY6,CREB3
PPAR Signaling	0.288	0.00962	#NUM!	HSP90B1
Virus Entry via Endocytic Pathways	0.28	0.00935	#NUM!	HLA-A
Oxidative Phosphorylation	0.275	0.00917	#NUM!	COX6B2
iCOS-iCOSL Signaling in T Helper Cells	0.269	0.00901	#NUM!	HLA-A
HGF Signaling	0.269	0.00901	#NUM!	CDKN1A
Rac Signaling	0.267	0.00893	#NUM!	CYFIP1
GPCR-Mediated Nutrient Sensing in Enteroendocrine Cells	0.267	0.00893	#NUM!	ADCY6
p38 MAPK Signaling	0.252	0.00847	#NUM!	CREB3
Cholecystokinin/Gastrin-mediated Signaling	0.249	0.0084	#NUM!	GNA13
G-Protein Coupled Receptor Signaling	0.249	0.00735	#NUM!	ADCY6,CREB3
CD28 Signaling in T Helper Cells	0.247	0.00833	#NUM!	HLA-A
IL-15 Production	0.245	0.00826	#NUM!	JAK2
G Beta Gamma Signaling	0.243	0.0082	#NUM!	GNA13
Inhibition of ARE-Mediated mRNA Degradation Pathway	0.243	0.0082	#NUM!	YWHAH
Gαi Signaling	0.236	0.008	#NUM!	ADCY6
IL-6 Signaling	0.236	0.008	#NUM!	JAK2
Endocannabinoid Neuronal Synapse Pathway	0.229	0.00781	#NUM!	ADCY6
Reelin Signaling in Neurons	0.228	0.00775	#NUM!	ARHGEF2
p70S6K Signaling	0.228	0.00775	#NUM!	YWHAH
Gα12/13 Signaling	0.225	0.00769	#NUM!	GNA13
Cellular Effects of Sildenafil (Viagra)	0.223	0.00763	#NUM!	ADCY6
Human Embryonic Stem Cell Pluripotency	0.215	0.00741	#NUM!	WNT4
Androgen Signaling	0.213	0.00735	#NUM!	GNA13
Iron homeostasis signaling pathway	0.211	0.0073	#NUM!	JAK2
PI3K Signaling in B Lymphocytes	0.21	0.00725	#NUM!	ATF5
Type II Diabetes Mellitus Signaling	0.202	0.00704	#NUM!	ACSL5
Axonal Guidance Signaling	0	0.0062	#NUM!	GNA13,PFN1,WNT4
Synaptic Long Term Depression	0	0.00529	#NUM!	GNA13
Acute Phase Response Signaling	0	0.00559	#NUM!	JAK2
Hepatic Cholestasis	0	0.00541	#NUM!	ADCY6
Hepatic Fibrosis / Hepatic Stellate Cell Activation	0	0.00538	#NUM!	BAX
Mitochondrial Dysfunction	0	0.00585	#NUM!	COX6B2
Role of Pattern Recognition Receptors in Recognition of Bacteria and Viruses	0	0.00649	#NUM!	EIF2S1
Cdc42 Signaling	0	0.00599	#NUM!	HLA-A
ILK Signaling	0	0.00526	#NUM!	CREB3
Role of Osteoblasts, Osteoclasts and Chondrocytes in Rheumatoid Arthritis	0	0.00455	#NUM!	WNT4
Role of NFAT in Cardiac Hypertrophy	0	0.00467	#NUM!	ADCY6
PKCθ Signaling in T Lymphocytes	0	0.00645	#NUM!	HLA-A
Gap Junction Signaling	0	0.00505	#NUM!	ADCY6
Sperm Motility	0	0.00448	#NUM!	JAK2
B Cell Receptor Signaling	0	0.00541	#NUM!	CREB3
Wnt/β-catenin Signaling	0	0.00578	#NUM!	WNT4
Integrin Signaling	0	0.00469	#NUM!	PFN1
Gustation Pathway	0	0.00649	#NUM!	ADCY6
Osteoarthritis Pathway	0	0.00474	#NUM!	CREB3
Sirtuin Signaling Pathway	0	0.00687	#NUM!	BAX,H1-0
Synaptogenesis Signaling Pathway	0	0.00641	#NUM!	ADCY6,CREB3
Systemic Lupus Erythematosus In B Cell Signaling Pathway	0	0.00364	#NUM!	JAK2
Calcium Signaling	0	0.00485	#NUM!	CREB3
