# Supplementary material for: Single-cell transcriptome analysis defines heterogeneity of the murine pancreatic ductal tree
Source: eLife. 2021 May 19;10:e67776. doi: 10.7554/eLife.67776 (PMC8184217; doi:10.7554/eLife.67776)
Supplement: Figure 2—source data 3. [file elife-67776-fig2-data3.xls]

## Sheet: DBA+ duct cluster 0 vs all
© 2000-2020 QIAGEN. All rights reserved.
Upstream Regulator	Expr Log Ratio	Molecule Type	Predicted Activation State	Activation z-score	Flags	p-value of overlap	Target Molecules in Dataset	Mechanistic Network
TO-901317		chemical reagent		0.712	bias	4.84e-09	Apoc1,APOE,CCND1,CRP,ENO1,FMO1,LIFR,PTGDS,Scd2
mibolerone		chemical drug		1.947	bias	4e-08	CCND1,DBI,GMNN,MME,PRELP,Scd2,Wfdc3
tretinoin		chemical - endogenous mammalian		1.283	bias	1.3e-07	APOE,CBS/CBSL,CCND1,CFTR,CLDN10,DBI,GMNN,GPX2,HES1,ID2,MIA,NAV2,OAT,PTGDS,SPP1,TGFB2,Wfdc18	29 (15)
nitrofurantoin		chemical drug		1.254		1.35e-07	ADAMTS1,APOE,CCND1,CRP,DBI,GPX2,SPP1
progesterone		chemical - endogenous mammalian		-0.048		2.41e-07	ADAMTS1,APOE,CCND1,CFTR,MME,PIGR,PTGDS,RTN4,Scd2,SPP1,TGFB2	24 (14)
phenylbutazone		chemical drug		1.432	bias	3.2e-07	ADAMTS1,CCND1,GPX2,RCN1,SPP1
dexamethasone		chemical drug		1.671		4.03e-07	ADAMTS1,APOE,CCND1,CRP,ENO1,FMO1,HES1,HILPDA,ID2,MIA,MME,PEBP1,PRELP,PTGDS,QSOX1,Scd2,SPP1,TGFB2,Wfdc18	31 (18)
HRAS		enzyme		1.473	bias	4.99e-07	Cald1,CCND1,CRP,HES1,ID2,LBH,RTN4,Scd2,SPON1,SPP1,TGFB2	30 (16)
OSM		cytokine		-0.369	bias	7.74e-07	ADAMTS1,CCND1,CRP,DEGS1,ID2,LIFR,OLFML2A,PIGR,QSOX1,SPP1	23 (11)
HIF1A		transcription regulator		0.648	bias	7.82e-07	ADAMTS1,ALDOC,APOE,CCND1,ENO1,HILPDA,ID2,LIFR,TGFB2	17 (7)
pirinixic acid		chemical toxicant		0.815	bias	1.02e-06	ALDOC,APOE,CCND1,CRP,DBI,HILPDA,ID2,LIFR,RTN4	21 (9)
beta-estradiol		chemical - endogenous mammalian		1.168	bias	1.5e-06	ADAMTS1,APOE,CCND1,CFTR,CRP,ENO1,FMO1,HES1,ID2,MME,MYO1B,OAT,PIGR,PTGDS,QSOX1,RHOV,TGFB2,Wfdc3	32 (19)
FGF19		growth factor				2.18e-06	APOE,CCND1,MME,PTGDS,Scd2
vancomycin		biologic drug	Activated	2.2	bias	2.18e-06	ADAMTS1,GPX2,RCN1,RTN4,SPP1
E. coli B5 lipopolysaccharide		chemical - endogenous non-mammalian		0.373	bias	2.83e-06	ADAMTS1,Apoc1,CCND1,DBI,FMO1,SPP1,TGFB2	25 (11)
NOTCH1		transcription regulator		0.165		3.38e-06	CCND1,HES1,ID2,OAT,PTGDS,SPP1,TGFB2	25 (11)
AR		ligand-dependent nuclear receptor		1.977	bias	3.43e-06	CCND1,DBI,DEGS1,MME,MYO1B,PIGR,PTGDS,SPP1,TGFB2	23 (11)
thyroid hormone		chemical - endogenous mammalian				5.2e-06	Apoc1,APOE,CCND1,DBI,OAT,PTGDS
TP73		transcription regulator		-1.219	bias	5.53e-06	CLDN10,HES1,ID2,LBH,RTN4,SPP1,TGFB2,Wfdc18
estrogen		chemical drug		0.848	bias	5.54e-06	APOE,CCND1,CFTR,OAT,PTGDS,SPP1,TGFB2	30 (17)
trichostatin A		chemical drug		0.874	bias	7.13e-06	ADAMTS1,APOE,CCND1,CLDN10,HES1,ID2,MME,MYO1B,OAT,RTN4,SPP1	29 (14)
dihydrotestosterone		chemical - endogenous mammalian		1.911	bias	1.01e-05	ADAMTS1,APOE,CCND1,DBI,ENO1,ID2,MME,SPP1,TGFB2	26 (15)
SB-431542		chemical reagent		-1		1.04e-05	CCND1,ECSCR,ID2,SPP1,TGFB2	20 (11)
HES1	0.687	transcription regulator		-0.526	bias	1.38e-05	HES1,OAT,PTGDS,SPP1	16 (5)
KRAS		enzyme		-0.152		1.41e-05	ALDOC,Cald1,CCND1,CFTR,ENO1,GMNN,HES1,LBH,MME,SPP1	20 (5)
DHX9		enzyme				1.44e-05	APOE,CCND1,ID2	3 (3)
RELA		transcription regulator				1.47e-05	APOE,CBS/CBSL,CCND1,CFTR,CRP,HES1,MIA,PTGDS	26 (12)
SB203580		chemical - kinase inhibitor	Inhibited	-2.774	bias	1.47e-05	ADAMTS9,CCND1,CRP,ENO1,LIFR,PTGDS,SPP1,TGFB2	29 (17)
IL1B		cytokine		1.369	bias	1.55e-05	ADAMTS1,APOE,CFTR,CRP,DBI,HES1,LIFR,MIA,PIGR,PTGDS,SPP1	27 (15)
WNT1		cytokine		1.393	bias	1.59e-05	CCND1,HES1,LBH,SPP1,Wfdc18	12 (6)
HMGA2		enzyme				1.67e-05	ID2,MIA,SPP1
triamterene		chemical drug	Activated	2	bias	1.89e-05	ADAMTS1,GPX2,RCN1,SPP1
methapyrilene		chemical drug		0		2.04e-05	APOE,CBS/CBSL,CCND1,CRP,DBI
fenamic acid		chemical reagent		1.982	bias	2.26e-05	ADAMTS1,GPX2,RCN1,SPP1
MYC		transcription regulator		1.691	bias	2.44e-05	ADAMTS1,Cald1,CCND1,DBI,ENO1,HES1,ID2,MYO1B,OAT,Scd2,SPP1,TGFB2	18 (9)
gemfibrozil		chemical drug		1.192	bias	2.53e-05	APOE,CCND1,CRP,RTN4	20 (9)
AHR		ligand-dependent nuclear receptor		0.083		2.69e-05	CCND1,CRP,ENO1,HES1,MMD2,SPP1,TGFB2	20 (14)
thioacetamide		chemical toxicant		1.951	bias	3.07e-05	ADAMTS1,GPX2,PRELP,RCN1,Scd2,SPP1
RBPJ		transcription regulator		-0.651	bias	3.24e-05	CCND1,CRP,HES1,OAT,TGFB2	22 (13)
ESR2		ligand-dependent nuclear receptor		1.276		3.29e-05	ADAMTS1,APOE,CBS/CBSL,CCND1,MME,PTGDS,SPP1,Wfdc3	26 (17)
fenofibrate		chemical drug		0.859	bias	4.15e-05	CCND1,CRP,DBI,GPX2,HILPDA,ID2
PSEN1		peptidase				4.22e-05	APOE,CCND1,DBI,ENO1,HES1,MME,PEBP1
TCF4		transcription regulator		0.922	bias	4.64e-05	ADAMTS9,CCND1,HES1,ID2,IGFBPL1,MIA,SPP1
SMAD3		transcription regulator				4.8e-05	CCND1,CRP,ID2,SPON1,SPP1,TGFB2	22 (14)
TWIST1		transcription regulator		1.342	bias	4.93e-05	ADAMTS1,MME,SPP1,TGFB2,Wfdc3
raloxifene		chemical drug	Activated	2.156		5.51e-05	CCND1,HES1,MYO1B,SPP1,TGFB2	18 (13)
elocalcitol		chemical drug				5.6e-05	SPP1,TGFB2
ZIC1		transcription regulator				5.6e-05	APOE,CCND1
PRL		cytokine		1.578	bias	5.74e-05	CCND1,ENO1,ID2,MME,SPP1,Wfdc18	15 (7)
TCF		group				7e-05	CCND1,GPX2,MME,RCN1	11 (5)
CTNNB1		transcription regulator	Activated	2.089	bias	7.09e-05	CCND1,GPX2,HES1,HILPDA,ID2,LBH,MME,OAT,RCN1,SPP1	18 (8)
CEBPB		transcription regulator		1.127	bias	7.51e-05	CCND1,CFTR,CRP,DEGS1,MIA,SPP1,Wfdc18	12 (4)
APP		other		1.722	bias	7.73e-05	ALDOC,APOE,CCND1,DBI,ENO1,HES1,KCNE3,MME,PEBP1,PTGDS
SP600125		chemical - kinase inhibitor		-1.225	bias	7.92e-05	ADAMTS9,APOE,CCND1,PTGDS,Scd2,SPP1	30 (18)
diclofenac		chemical drug				8.03e-05	CCND1,CRP,LBH
indole-3-carbinol		chemical drug				8.03e-05	CCND1,FMO1,SPP1
RXRA		ligand-dependent nuclear receptor		1.067		8.06e-05	APOE,CCND1,NAV2,PTGDS,SPP1,TGFB2	28 (12)
bezafibrate		chemical drug		-0.152	bias	8.26e-05	APOE,CRP,DBI,HILPDA	11 (3)
Cobra Venom Factor		chemical - endogenous non-mammalian				8.38e-05	CRP,TGFB2
doxorubicin		chemical drug		1.673	bias	8.53e-05	ADAMTS1,CCND1,GPX2,ID2,PTGDS,RCN1,SPP1	28 (14)
NCOR1		transcription regulator				8.6e-05	CCND1,DBI,MME,PTGDS	12 (3)
allopurinol		chemical drug	Activated	2	bias	8.95e-05	ADAMTS1,GPX2,RCN1,SPP1
MSX2		transcription regulator				9.5e-05	CCND1,SPP1,TGFB2	12 (4)
FGFR3		kinase				9.5e-05	CCND1,HES1,SPP1
MAP2K1		kinase		1.953	bias	0.0001	APOE,CCND1,CRP,ENO1,NUDT19	25 (15)
MEX3A		other				0.000103	CCND1,KCNE3,PRELP
tetradecanoylphorbol acetate		chemical drug		1.705	bias	0.000103	ADAMTS1,CBS/CBSL,CCND1,CFTR,HES1,ID2,LBH,MME,NAV2,PTGDS,SPP1	29 (17)
N-cor		group				0.000105	CCND1,CRP,HES1,Scd2
Nfat (family)		group		1.964	bias	0.000109	CCND1,LBH,RHOJ,TGFB2
puromycin aminonucleoside		chemical reagent	Activated	2	bias	0.000113	ADAMTS1,GPX2,RCN1,SPP1
triamcinolone		chemical drug				0.000117	APOE,CBS/CBSL
CCN2		growth factor		0.911	bias	0.000121	ADAMTS1,CCND1,ENO1,HES1
RCE1		peptidase				0.00013	HS6ST2,RCN1,TGFB2
IFNG		cytokine		1.451	bias	0.000132	ADAMTS9,CCND1,CFTR,DEGS1,ENO1,LIFR,NCALD,PIGR,SPON1,SPP1,TGFB2,Wfdc18	22 (8)
uranyl nitrate		chemical toxicant		0.152		0.000135	ID2,NUDT19,PEBP1,SPP1
Laminin (complex)		complex				0.000149	CCND1,ID2,TGFB2
Esrra		transcription regulator				0.000155	ALDOC,ENO1,Scd2,SPP1
LTBP4		growth factor				0.000156	ID2,TGFB2
DKK2		other				0.000156	CCND1,SPP1	11 (4)
simvastatin		chemical drug		-0.985		0.000159	ADAMTS1,APOE,CCND1,CRP,SPP1	22 (13)
ANGPT1		growth factor				0.00016	ADAMTS1,ADAMTS9,CCND1
D-glucose		chemical - endogenous mammalian	Activated	2.195	bias	0.000171	ALDOC,CCND1,DBI,ENO1,OAT,PTGDS,Scd2,SPP1	25 (13)
LIF		cytokine				0.000173	CCND1,CRP,HES1,LIFR,SPP1	13 (6)
lipopolysaccharide		chemical drug		1.626	bias	0.000188	APOE,CCND1,CFTR,CRP,ENO1,HES1,ID2,LIFR,MME,PIGR,PTGDS,Scd2,SPP1,TGFB2	31 (19)
ZIC2		transcription regulator				0.0002	APOE,CCND1
POU2F1		transcription regulator				0.000202	CCND1,CRP,PTGDS,SPP1
ARNT		transcription regulator				0.000209	ALDOC,DEGS1,ENO1,ID2
PRKCA		kinase				0.000215	CCND1,HES1,ID2,TGFB2	24 (13)
2-bromoethylamine		chemical reagent				0.000221	ADAMTS1,GPX2,SPP1
Hedgehog		group				0.000235	CCND1,HES1,SPP1
FGF1		growth factor		1.242		0.000236	APOE,CCND1,SPP1,TGFB2	26 (20)
NR3C1		ligand-dependent nuclear receptor				0.000247	APOE,CCND1,DBI,DEGS1,OAT,PIGR,RTN4,SPP1	12 (3)
DGCR8		enzyme				0.000249	CCND1,HES1,ID2	14 (6)
RUNX3		transcription regulator				0.000251	CCND1,LIFR,SPP1,TGFB2	6 (2)
LY294002		chemical - kinase inhibitor	Inhibited	-2.577	bias	0.000252	ADAMTS1,APOE,Cald1,CCND1,CRP,HES1,SPP1	16 (12)
CSF2		cytokine		1.948	bias	0.000257	CCND1,HILPDA,ID2,MME,QSOX1,RHOV,SPP1
IRS1		enzyme				0.000274	CCND1,FMO1,ID2,SPP1	20 (7)
indomethacin		chemical drug		0.655	bias	0.00028	ADAMTS1,CCND1,GPX2,RCN1,SPP1	15 (7)
FGFR2		kinase				0.000282	CCND1,HES1,ID2,SPP1	14 (7)
LMNB1		other				0.000295	HS6ST2,RCN1,TGFB2
JAG1		growth factor				0.000295	CCND1,HES1,SPP1	25 (13)
enterolactone		chemical - endogenous mammalian				0.000305	CCND1,SPP1
pterostilbene		chemical drug				0.000305	CCND1,HES1
CX3CL1		cytokine				0.000307	ADAMTS1,ID2,SPP1,TGFB2	13 (6)
enalapril		biologic drug				0.000311	ADAMTS1,GPX2,SPP1
APC		enzyme				0.000316	CCND1,HES1,ID2,SPP1	22 (11)
SREBF1		transcription regulator		1.926	bias	0.000344	ALDOC,DBI,OAT,PTGDS,Scd2	17 (5)
hexachlorobenzene		chemical toxicant				0.000346	GPX2,RCN1,SPP1
Gcg		other				0.000364	MMD2,NCALD,OAT
TNF		cytokine		0.854	bias	0.000381	APOE,CCND1,CFTR,CRP,DBI,FMO1,HES1,LIFR,MIA,OLFML2A,PIGR,SPP1,TGFB2	20 (8)
ciprofibrate		chemical drug		-0.152		0.000414	ADAMTS1,CRP,DBI,OAT
calcitriol		chemical drug		0.115		0.000421	CCND1,ID2,LBH,OAT,OLFML2A,SPP1,TGFB2	28 (19)
EN1		transcription regulator				0.000431	ALDOC,CCND1
F2		peptidase	Activated	2.219	bias	0.000455	ADAMTS9,CCND1,LBH,RHOJ,TGFB2
halofuginone		chemical drug				0.000458	HES1,PRELP,Scd2,SPP1
USF2		transcription regulator				0.000465	CFTR,PIGR,SPP1
sodium arsenite		chemical drug				0.000465	CBS/CBSL,CCND1,ENO1
gentamicin C		chemical drug				0.000487	ADAMTS1,GPX2,SPP1
Sn50 peptide		chemical toxicant				0.000487	APOE,CRP,PTGDS	11 (5)
OGA		enzyme		0.447		0.000492	ALDOC,APOE,CCND1,IGFBPL1,PTGDS,Scd2	19 (5)
HOXA4		transcription regulator				0.000502	CCND1,TGFB2	5 (2)
FGF2		growth factor	Activated	2.168	bias	0.000511	CCND1,ENO1,HES1,ID2,SPP1,TGFB2	25 (17)
fulvestrant		chemical drug		1.095		0.000511	CCND1,HES1,ID2,MYO1B,TGFB2	20 (12)
NR4A1		ligand-dependent nuclear receptor				0.000537	APOE,CCND1,ENO1,PEBP1,PTGDS	12 (5)
SPI1		transcription regulator		0.277	bias	0.000546	CCND1,HES1,ID2,MME,SPP1	24 (13)
YAP1		transcription regulator				0.000546	ADAMTS1,CCND1,ID2,LIFR,TGFB2	14 (7)
birabresib		chemical drug				0.000557	ADAMTS1,HS6ST2,NCALD
cisplatin		chemical drug		0.863	bias	0.000575	ADAMTS1,CCND1,GPX2,ID2,OAT,PEBP1,RCN1,SPP1	18 (7)
APBB1		transcription regulator				0.000579	CCND1,HES1	11 (6)
N-ethyl-N-nitrosourea		chemical toxicant				0.000579	CRP,SPP1
decitabine		chemical drug		0.243	bias	0.000619	ADAMTS1,APOE,CCND1,CFTR,MYO1B,RTN4,SPP1,TGFB2	12 (4)
metribolone		chemical reagent		1.076	bias	0.000643	ADAMTS1,ALDOC,CCND1,ENO1,LIFR,PIGR
CDK4/6		group				0.00066	CCND1,ENO1,RCN1
STK3		kinase				0.00066	CCND1,SPP1	14 (7)
MAML1		transcription regulator				0.00066	CCND1,HES1	5 (2)
mevastatin		chemical drug				0.00066	ADAMTS1,APOE
ESRRG		ligand-dependent nuclear receptor				0.000688	ALDOC,ENO1,KCNE3
ADAM17		peptidase				0.000716	CCND1,HES1,NCALD	16 (5)
CISH		other				0.000745	HILPDA,RHOV,SPP1
tazemetostat		chemical drug		-0.664	bias	0.000745	ADAMTS1,CCND1,MYO1B,RTN4,SPP1
Integrin		complex				0.000747	CCND1,TGFB2	17 (9)
PTH		other		1.505	bias	0.000749	ADAMTS1,CCND1,MME,SPP1	15 (7)
SMARCB1		transcription regulator				0.000766	CCND1,CRP,GMNN,HES1
L-triiodothyronine		chemical - endogenous mammalian	Activated	2.383	bias	0.000792	CCND1,ID2,MMD2,OAT,PTGDS,Scd2
cardiotoxin		chemical - other				0.0008	CCND1,GMNN,PIGR,SPP1
PPARA		ligand-dependent nuclear receptor		1.96	bias	0.00081	APOE,CCND1,DBI,HILPDA,LIFR,RTN4	14 (3)
dinoprost		chemical - endogenous mammalian				0.000836	CCND1,ID2,SPP1	24 (18)
MAPK7		kinase				0.000836	ADAMTS1,ALDOC,CCND1
captopril		chemical drug				0.000836	GPX2,SPP1,TGFB2
aspirin		chemical drug		-1.98	bias	0.000852	CCND1,CRP,HILPDA,LIFR	20 (9)
LEP		growth factor	Activated	2.166	bias	0.000856	CCND1,CRP,HES1,LIFR,Scd2,SPP1	27 (19)
PRNP		other				0.000868	APOE,CCND1,ID2	11 (4)
gefitinib		chemical drug				0.00087	ADAMTS1,CCND1,LIFR,Wfdc18
SP2509		chemical reagent		-0.664	bias	0.000876	ADAMTS1,CCND1,MYO1B,RTN4,SPP1
mir-203		microRNA				0.000937	HES1,LIFR	5 (2)
SHH		peptidase				0.000965	ADAMTS1,CCND1,SPP1,TGFB2	6 (2)
HOXA10		transcription regulator		0	bias	0.000965	APOE,ID2,PIGR,Scd2
USF1		transcription regulator				0.000969	CBS/CBSL,PIGR,SPP1
MTPN		transcription regulator				0.001	CCND1,SPP1,TGFB2
ESRRA		ligand-dependent nuclear receptor		1.948	bias	0.001	ALDOC,ENO1,Scd2,SPP1
TP63		transcription regulator		0.974	bias	0.00101	ADAMTS1,CCND1,GPX2,HES1,SPON1,TGFB2	8 (3)
SAV1		other				0.00104	CCND1,SPP1
RND3		enzyme				0.00104	CCND1,HES1
CFTR	0.106	ion channel				0.00108	CFTR,GPX2,Scd2
mifepristone		chemical drug		-1.417		0.00108	APOE,CCND1,CFTR,MME,SPP1	27 (15)
HNF1A		transcription regulator				0.0011	CBS/CBSL,CCND1,CRP,FMO1,GPX2,PIGR
JUN		transcription regulator				0.00112	APOE,CCND1,HES1,ID2,PTGDS,SPP1	26 (18)
AGT		growth factor		1.77	bias	0.00113	CCND1,CRP,HES1,NCALD,SPP1,TGFB2	27 (21)
TCF7L2		transcription regulator		1.199	bias	0.00114	CCND1,DEGS1,ID2,LBH,SPP1	11 (5)
SRA1		transcription regulator				0.00115	HES1,TGFB2
HDAC7		transcription regulator				0.00115	CCND1,MMD2
nicotine		chemical drug				0.0012	CCND1,DBI,ENO1,SPP1	20 (11)
HGF		growth factor	Activated	2.382	bias	0.0012	ADAMTS1,CCND1,GMNN,HES1,SPP1,TGFB2	21 (18)
MYOC		other				0.00123	ADAMTS1,IGFBPL1,SPP1
salinosporamide A		chemical drug				0.00126	CCND1,PEBP1
MFSD2A		transporter				0.00126	ALDOC,Scd2
NCOA3		transcription regulator				0.00127	CCND1,HES1,TGFB2	16 (9)
RASSF1		other				0.00131	APOE,CCND1,SPP1	22 (11)
TGFBR2		kinase		1.951		0.00134	CCND1,PTGDS,SPP1,TGFB2	27 (18)
POU2F2		transcription regulator				0.00136	ALDOC,ENO1,SPP1
HTATIP2		transcription regulator				0.00138	CCND1,SPP1
deferoxamine		chemical drug		-0.152	bias	0.00144	CCND1,ENO1,SPP1,TGFB2	25 (14)
etoposide		chemical drug		1.387	bias	0.00147	CCND1,ID2,MME,PEBP1
LCAT		enzyme				0.0015	APOE,CCND1
TAF4		transcription regulator				0.00154	CCND1,ID2,SPP1
miR-125b-5p (and other miRNAs w/seed CCCUGAG)		mature microRNA				0.00154	ADAMTS1,ID2,PIGR
daidzein		chemical drug				0.00158	APOE,CCND1,ID2	14 (7)
bucladesine		chemical toxicant		1.2	bias	0.00159	ADAMTS1,APOE,CCND1,QSOX1,TGFB2	23 (13)
BMP2		growth factor		0.501	bias	0.0016	Cald1,CCND1,ID2,SPP1	9 (4)
deoxycorticosterone acetate		chemical drug				0.00163	Cald1,SPP1
HEXIM1		transcription regulator				0.00163	CCND1,TGFB2
NR2C2		ligand-dependent nuclear receptor				0.00163	APOE,CCND1	7 (4)
GLI1		transcription regulator		1.939	bias	0.00163	CCND1,DEGS1,ID2,SPP1
ESR1		ligand-dependent nuclear receptor	Activated	2.551		0.00164	APOE,CCND1,ENO1,HES1,LIFR,MME,PTGDS,Scd2,SPP1,TGFB2	31 (18)
BMP6		growth factor				0.00168	ADAMTS1,Cald1,ID2
FN1		enzyme		1.893	bias	0.00169	APOE,CCND1,CRP,SPP1	18 (12)
U0126		chemical - kinase inhibitor		-1.554	bias	0.00173	CCND1,CFTR,LIFR,PRELP,SPP1,TGFB2	33 (17)
TP53		transcription regulator		0.872		0.00174	APOE,Cald1,CCND1,DBI,FMO1,GMNN,HES1,ID2,OAT,PTGDS,SPP1,TGFB2	25 (17)
BMP4		growth factor		0.404	bias	0.00175	Cald1,CCND1,HES1,ID2
BMP		group				0.00176	ID2,SPP1
NfkB1-RelA		complex				0.00176	CCND1,CRP
MST1		growth factor				0.00176	CCND1,SPP1	19 (11)
forskolin		chemical toxicant		0.748	bias	0.00185	ADAMTS1,ALDOC,CCND1,CFTR,HILPDA,ID2,SPP1	17 (8)
BMPR2		kinase				0.0019	ID2,SPP1
DTX1		transcription regulator				0.0019	SPP1,TGFB2	13 (5)
trabectedin		chemical drug				0.0019	CCND1,OAT
INSIG1		other				0.00194	Apoc1,APOE,Scd2
ETS1		transcription regulator				0.00199	CCND1,ID2,SPP1,TGFB2	23 (11)
CRYAB		other				0.00204	CCND1,MME
sterol		chemical - endogenous mammalian				0.00204	DBI,Scd2	5 (2)
cycloheximide		chemical reagent	Inhibited	-2.219		0.00207	CCND1,MME,PIGR,PTGDS,SPP1	30 (18)
ROCK1		kinase				0.00219	CCND1,TGFB2
NF1		other				0.00219	CBS/CBSL,CCND1
dichlorovinylcysteine		chemical toxicant				0.00219	CCND1,ENO1
Mapk		group				0.00222	CCND1,PIGR,SPP1	16 (8)
EPAS1		transcription regulator				0.00227	ALDOC,CCND1,ENO1,HILPDA
MAPK1		kinase		1.091		0.00229	APOE,CCND1,GMNN,OLFML2A,SPP1	24 (13)
troglitazone		chemical drug		-0.173		0.00229	Cald1,CCND1,DBI,MME,SPP1	24 (11)
NR5A2		ligand-dependent nuclear receptor				0.00233	CCND1,CRP,PTGDS
PD98059		chemical - kinase inhibitor		-1.808	bias	0.00233	Cald1,CCND1,CRP,ENO1,LIFR,SPP1	22 (14)
prostaglandin D2		chemical - endogenous mammalian				0.00234	CCND1,PTGDS
PRKDC		kinase				0.00234	APOE,CCND1	2 (2)
SIAH2		transcription regulator				0.00234	DBI,MME	9 (3)
SP1		transcription regulator				0.00238	ADAMTS1,APOE,CBS/CBSL,CCND1,SPP1,TGFB2
NR2F1-AS1		other				0.00239	CCND1
NCK		group				0.00239	CCND1
PLB1		enzyme				0.00239	MIA
FBXO31		enzyme				0.00239	CCND1
DNAJA4		other				0.00239	APOE
KCNJ12		ion channel				0.00239	CCND1
CALCOCO1		transcription regulator				0.00239	CCND1
URGCP		other				0.00239	CCND1
CCDC62		transcription regulator				0.00239	CCND1
CDCA4		other				0.00239	GMNN
PLAC1		other				0.00239	CCND1
FERD3L		transcription regulator				0.00239	HES1
Integrin alpha 5 beta 1		complex				0.00239	CCND1
Mapk kinase		group				0.00239	CCND1
FANCG		other				0.00239	HES1
FANCL		enzyme				0.00239	HES1
Tenascin		group				0.00239	CCND1
ADCY2		enzyme				0.00239	CCND1
miR-571 (miRNAs w/seed GAGUUGG)		mature microRNA				0.00239	GMNN
ZNF613		transcription regulator				0.00239	ID2
TOB2		other				0.00239	CCND1
GTPBP4		enzyme				0.00239	CCND1
NOTCH2NLA/NOTCH2NLB		other				0.00239	HES1
PTPRU		phosphatase				0.00239	CCND1
PMS2		enzyme				0.00239	CCND1
FANCE		other				0.00239	HES1
CDK20		kinase				0.00239	CCND1
PTOV1		other				0.00239	CCND1
ALYREF		transcription regulator				0.00239	APOE
IFITM3		other				0.00239	SPP1
RPLP0		other				0.00239	CCND1
E. coli 0111:B4 peptidoglycan		chemical - endogenous non-mammalian				0.00239	DBI
amlexanox		chemical drug				0.00239	CCND1
elenbecestat		chemical drug				0.00239	RTN4
sulfaphenazole		chemical drug				0.00239	CCND1
Ro 20-1724		chemical reagent				0.00239	CCND1
anti-miR-302d		chemical reagent				0.00239	CCND1
anti-miR-302c inhibitor		chemical reagent				0.00239	CCND1
beta-penta-O-galloyl-glucose		chemical - endogenous non-mammalian				0.00239	CCND1
hydrocortisone phosphate		chemical drug				0.00239	APOE
NR2E1		ligand-dependent nuclear receptor				0.0025	CCND1,TGFB2
PTH1R		G-protein coupled receptor				0.0025	CCND1,SPP1
IFRD1		other				0.0025	SPP1,Wfdc18
crocidolite asbestos		chemical toxicant				0.0025	CCND1,SPP1	10 (3)
VDR		transcription regulator		1.93	bias	0.00252	CCND1,LBH,SPP1,TGFB2	25 (15)
IL6		cytokine		0.752	bias	0.00263	ADAMTS1,APOE,CCND1,CRP,ID2,LIFR,SPP1	24 (14)
grape seed extract		chemical drug				0.00266	CCND1,ENO1
Fc gamma receptor		group				0.00266	CCND1,HES1	5 (4)
arsenite		chemical toxicant				0.00271	CCND1,HS6ST2,TGFB2
GH1		growth factor				0.00278	DBI,ID2,SPP1
TGFB2	0.438	growth factor				0.00278	MIA,SPP1,TGFB2
prednisolone		chemical drug		0	bias	0.0028	APOE,CRP,HES1,SPP1	23 (10)
prostaglandin J2		chemical - endogenous mammalian				0.00283	Cald1,CCND1
ARHGAP31		other				0.00283	ID2,TGFB2
GJA1		transporter				0.00283	CCND1,SPP1	11 (4)
Secretase gamma		complex				0.003	HES1,MME
ABCB4		transporter				0.003	SPP1,TGFB2
PAK1		kinase				0.003	CCND1,HES1	18 (7)
EWSR1		other				0.003	CCND1,KCNE3
tacrolimus		chemical drug				0.00301	CCND1,LBH,RCN1,SPP1	12 (8)
GW3965		chemical reagent				0.00306	Apoc1,APOE,CRP
staurosporine		chemical - kinase inhibitor				0.00313	CCND1,CFTR,MME
PSMB11		peptidase				0.0032	CCND1,LIFR,TGFB2
SRC		kinase				0.0032	CCND1,ENO1,SPP1	23 (15)
GNAQ		enzyme				0.00328	ADAMTS1,CCND1,TGFB2
CSF1		cytokine		1.961	bias	0.00328	APOE,CCND1,ENO1,SPP1	20 (12)
PPARD		ligand-dependent nuclear receptor		-0.218	bias	0.00328	APOE,CCND1,ENO1,MMD2
RUNX2		transcription regulator				0.00335	CCND1,PTGDS,SPP1	23 (12)
miR-450a-5p (and other miRNAs w/seed UUUGCGA)		mature microRNA				0.00336	SPP1,TGFB2
GAPDH		enzyme				0.00336	ENO1,SPP1
lipoxin A4		chemical - endogenous mammalian				0.00355	CCND1,CFTR	5 (2)
SOD1		enzyme				0.00366	ALDOC,APOE,CCND1,SPP1	24 (12)
nitrofen		chemical toxicant				0.00374	ENO1,RTN4
WNT5A		cytokine				0.00374	CCND1,ID2,SPP1	25 (14)
Sb202190		chemical - kinase inhibitor				0.00391	CCND1,CFTR,CRP	13 (7)
EP300		transcription regulator		1.974	bias	0.00394	CCND1,ID2,MIA,MME,TGFB2	15 (4)
JAG2		growth factor				0.00394	HES1,SPP1
ethionine		chemical toxicant				0.00394	GPX2,SPP1
TGFB1		growth factor		0.676	bias	0.00397	APOE,CCND1,CRP,ENO1,HES1,HS6ST2,ID2,LIFR,PTGDS,SPP1,TGFB2	28 (23)
NRG1		growth factor				0.00402	CCND1,HES1,LIFR,TGFB2	15 (8)
NFKBIA		transcription regulator		1.414	bias	0.00405	CCND1,CFTR,HES1,LIFR,TGFB2	26 (12)
filgrastim		biologic drug		0.391		0.00405	ENO1,HILPDA,MME,QSOX1,SPP1
ABL1		kinase				0.00414	CCND1,TGFB2	9 (4)
carbamylcholine		chemical drug				0.00414	APOE,CCND1	27 (14)
histone deacetylase		complex				0.00414	CCND1,ID2
HDAC1		transcription regulator				0.00418	CCND1,HES1,MME,SPP1	12 (7)
THRB		ligand-dependent nuclear receptor				0.00429	CCND1,CFTR,PTGDS,SPP1	13 (7)
CASR		G-protein coupled receptor				0.00433	CCND1,LBH,TGFB2
NR3C2		ligand-dependent nuclear receptor				0.00433	ADAMTS1,Apoc1,APOE
HSPA9		other				0.00434	HES1,NAV2
POSTN		other				0.00434	HES1,SPP1
NFkB (complex)		complex		0.433	bias	0.00435	ADAMTS9,APOE,CCND1,CFTR,CRP,SPP1	24 (14)
IHH		enzyme				0.00455	CCND1,SPP1
phenacetin		chemical drug				0.00455	GPX2,SPP1
cyclopamine		chemical reagent				0.00455	CCND1,SPP1	6 (3)
SOX11		transcription regulator				0.0046	CCND1,HILPDA,MYO1B
TERT		enzyme				0.0046	CCND1,SPON1,SPP1	11 (3)
dextran sulfate		chemical drug				0.00474	ADAMTS1,CCND1,PIGR,TGFB2
beta-carotene		chemical - endogenous mammalian				0.00477	DBI,Scd2
4-aminopyrazolo(3,4-d)pyrimidine		chemical reagent				0.00478	APOE
isopropyl thiogalactoside		chemical reagent				0.00478	CCND1
gentamicin C1		chemical drug				0.00478	SPP1
CERT1		kinase				0.00478	CCND1
abciximab		biologic drug				0.00478	CRP
lonaprisan		chemical drug				0.00478	CCND1
nitrosomethylurethane		chemical reagent				0.00478	CCND1
RBM15		other				0.00478	HES1
REM2		enzyme				0.00478	CCND1
RPRD1B		other				0.00478	CCND1
CCDC88C		other				0.00478	CCND1
OSI-027		chemical drug				0.00478	CCND1
VENTX		transcription regulator				0.00478	CCND1
ETS-ELK1		complex				0.00478	CCND1
CTNNβ-LEF1		complex				0.00478	CCND1
EIF4H		translation regulator				0.00478	CCND1
RNMT		enzyme				0.00478	CCND1
MCF2L		other				0.00478	CCND1
FANCF		other				0.00478	HES1
Til1		other				0.00478	SPP1
RRAD		enzyme				0.00478	CCND1
AFM		transporter				0.00478	APOE
PTPRF		phosphatase				0.00478	CCND1
DAPK3		kinase				0.00478	CCND1
RAC3		enzyme				0.00478	CCND1
lynestrenol		chemical drug				0.00478	APOE
CCNDBP1		other				0.00478	CCND1
NASP		other				0.00478	CCND1
KCNE2		ion channel				0.00478	KCNE3
MAML3		transcription regulator				0.00478	HES1
FBXO4		enzyme				0.00478	CCND1
BCLAF1		transcription regulator				0.00478	CCND1
HES7		transcription regulator				0.00478	HES1
ILKAP		phosphatase				0.00478	CCND1
ING2		transcription regulator				0.00478	SPP1
MXD4		transcription regulator				0.00478	ID2
DPH1		other				0.00478	CCND1
cyclophosphamide/doxorubicin		chemical drug				0.00478	CRP
ralimetinib		chemical drug				0.00478	SPP1
TFA-12		chemical reagent				0.00478	HES1
parsatuzumab		biologic drug				0.00478	HES1
APOC1		transporter				0.00478	APOE
AP2B1		transporter				0.00478	PTGDS
MAML2		transcription regulator				0.00478	HES1
lapatinib/trastuzumab		biologic drug				0.00478	CRP
sorafenib derivative SC-1		chemical reagent				0.00478	CCND1
phosphorylethanolamine		chemical - endogenous mammalian				0.00478	CCND1
inostamycin		chemical reagent				0.00478	CCND1
neratinib		chemical drug				0.00478	CCND1
(S)-flurbiprofen		chemical drug				0.00478	CCND1
procaterol		chemical drug				0.00478	HILPDA
22-hydroxycholesterol		chemical - endogenous mammalian				0.00478	APOE
baicalein		chemical drug				0.00499	APOE,CCND1	13 (7)
STK11		kinase		-1	bias	0.00504	CCND1,ENO1,HILPDA,SPP1	14 (6)
IL5		cytokine		1.982	bias	0.0051	ALDOC,ENO1,QSOX1,Scd2
STAT5A		transcription regulator		1.103		0.0051	APOE,CCND1,ID2,Wfdc18	15 (7)
lovastatin		chemical drug				0.00517	ADAMTS1,APOE,CCND1	9 (2)
N-[N-(3,5-difluorophenacetyl-L-Ala)]-S-phenylglycine t-butyl ester		chemical - protease inhibitor				0.00521	HES1,PTGDS	12 (3)
NFKB1		transcription regulator		1.267	bias	0.00523	APOE,CCND1,CFTR,CRP	25 (10)
WNT3A		cytokine		1.929	bias	0.00523	CCND1,LBH,NCALD,TGFB2
rosiglitazone		chemical drug		0.391	bias	0.00543	ADAMTS1,APOE,CCND1,CRP,HILPDA	16 (10)
VitaminD3-VDR-RXR		complex				0.00544	SPP1,TGFB2
MED13		transcription regulator				0.00544	Apoc1,ENO1
PRKACA		kinase				0.00544	CCND1,ID2	12 (6)
Histone h4		group				0.00547	CCND1,HES1,SPP1	14 (5)
AKT1		kinase		0.84	bias	0.00561	CCND1,ENO1,SPP1,TGFB2	25 (12)
valproic acid		chemical drug		0.332		0.00573	CCND1,DBI,ID2,MME,SPP1	19 (12)
SMAD7		transcription regulator				0.00578	CRP,ID2,TGFB2	12 (5)
JUNB		transcription regulator				0.00589	CCND1,HES1,ID2	20 (7)
TOB1		transcription regulator				0.00591	CCND1,GMNN
ADRA1B		G-protein coupled receptor				0.00591	CCND1,Scd2
monocrotaline		chemical toxicant				0.00591	CCND1,SPP1
n-3 fatty acids		chemical drug				0.00591	CBS/CBSL,GPX2
LEF1		transcription regulator				0.006	CCND1,ID2,SPP1	24 (13)
cytokine		group				0.006	CCND1,CRP,TGFB2	11 (4)
Insulin		group		1.467	bias	0.00603	APOE,CCND1,DBI,HES1,Scd2	28 (16)
17-alpha-ethinylestradiol		chemical drug				0.0061	APOE,LIFR,PTGDS	16 (7)
SCARB1		transporter				0.00615	APOE,SPP1	7 (4)
ITGA5		transmembrane receptor				0.00615	APOE,CCND1	11 (6)
KLF4		transcription regulator		0.606	bias	0.00616	ADAMTS1,CCND1,HES1,TGFB2	7 (2)
kainic acid		chemical toxicant				0.00644	APOE,CCND1,SPP1	23 (15)
medroxyprogesterone acetate		chemical drug				0.00644	ADAMTS1,CCND1,RHOV
diethylstilbestrol		chemical drug		-0.548	bias	0.00652	CCND1,FMO1,OLFML2A,PIGR
INS		other				0.00655	CBS/CBSL,CCND1,CRP	10 (4)
Ins1		other		1.26	bias	0.00659	CCND1,LIFR,Scd2,Wfdc18	13 (4)
IL10RA		transmembrane receptor		1		0.00659	CBS/CBSL,CFTR,KCNE3,SPON1
PLK1		kinase				0.00665	GMNN,TGFB2
BSG		transporter				0.00665	CCND1,CRP
beta-naphthoflavone		chemical toxicant				0.00665	APOE,CRP
MAP2K5		kinase				0.00691	ALDOC,CCND1
FHL2		transcription regulator				0.00691	CCND1,SPP1	21 (14)
ADRB2		G-protein coupled receptor				0.00691	MME,SPP1
VCAN		other				0.00701	ADAMTS9,APOE,PRELP
HTT		transcription regulator				0.00703	ALDOC,APOE,CCND1,PRELP,Scd2,SPP1	26 (12)
1-palmitoyl-2-arachidonoyl-phosphatidylcholine		chemical - endogenous mammalian				0.00717	CCND1
hyodeoxycholic acid		chemical - endogenous mammalian				0.00717	APOE
myosin-light-chain kinase		group				0.00717	CCND1
FKHR		group				0.00717	CCND1
Beta Secretase		group				0.00717	MME
NSD3		enzyme				0.00717	CCND1
Jun-ATF2		complex				0.00717	CCND1
PRAG1		kinase				0.00717	HES1
NIBAN2		transcription regulator				0.00717	CCND1
NOP58		enzyme				0.00717	CCND1
GPC6		transmembrane receptor				0.00717	CCND1
NDUFAF3		other				0.00717	CCND1
PSMD14		peptidase				0.00717	CCND1
KLHL2		other				0.00717	CCND1
OLA1		enzyme				0.00717	CCND1
methylamphotericin B		chemical drug				0.00717	SPP1
UBE2D3		enzyme				0.00717	CCND1
SRGAP1		other				0.00717	CCND1
SERTAD1		transcription regulator				0.00717	CCND1
GPC3		other				0.00717	CCND1
MAT2B		enzyme				0.00717	CCND1
AGAP2		enzyme				0.00717	CCND1
U2AF2		other				0.00717	CCND1
PHIP		other				0.00717	CCND1
riociguat		chemical drug				0.00717	SPP1
mir-497		microRNA				0.00717	CCND1
SGI 1776		chemical drug				0.00717	CCND1
RALGDS		other				0.00717	CCND1
MGAT4A		enzyme				0.00717	CCND1
EIF2B1		translation regulator				0.00717	CCND1
AHNAK		other				0.00717	CCND1
PTTG1IP		other				0.00717	CCND1
SRPK2		kinase				0.00717	CCND1
CTAG1A/CTAG1B		other				0.00717	CCND1
SPEN		transcription regulator				0.00717	HES1
GOPC		transporter				0.00717	CFTR
ARHGEF2		other				0.00717	CCND1
ALPL		phosphatase				0.00717	SPP1
RASSF7		other				0.00717	CCND1
PES1		other				0.00717	CCND1
RBBP8		enzyme				0.00717	CCND1
MXD3		transcription regulator				0.00717	ID2
CYP2C9		enzyme				0.00717	CCND1
RDH16		enzyme				0.00717	CCND1
ATAD2		enzyme				0.00717	CCND1
(E)-1-(2-nitrovinyl)naphthalene		chemical reagent				0.00717	CCND1
(E)-9-(2-nitrovinyl)anthracene		chemical reagent				0.00717	CCND1
rocuronium		chemical drug				0.00717	CCND1
natamycin		chemical drug				0.00717	SPP1
tarenflurbil		chemical drug				0.00717	CCND1
betamethasone valerate		chemical drug				0.00717	CCND1
R-etodolac		chemical drug				0.00717	CCND1
mizoribine		chemical drug				0.00717	CCND1
ponasterone A		chemical reagent				0.00717	CCND1
Rock		group				0.00717	CCND1,SPP1	21 (13)
SFRP1		transmembrane receptor				0.00717	CCND1,TGFB2
GHR		transmembrane receptor				0.00717	CCND1,SPP1	10 (3)
PML		transcription regulator				0.00725	APOE,CCND1,ID2
tamoxifen		chemical drug		0.927		0.00727	CCND1,HES1,Scd2,SPP1	27 (16)
MAP3K1		kinase				0.00743	CCND1,Wfdc18
Hdac		group				0.00749	ADAMTS1,CCND1,SPP1	8 (4)
WWTR1		transcription regulator				0.0077	ID2,SPP1
carboplatin		chemical drug				0.0077	GPX2,SPP1
PDGF BB		complex		1.128	bias	0.008	CCND1,FMO1,HES1,Scd2	5 (3)
MAPK8		kinase				0.00812	APOE,CCND1,CRP	15 (8)
norepinephrine		chemical - endogenous mammalian				0.00812	GMNN,HILPDA,PIGR
APOE	0.999	transporter				0.00817	APOE,CCND1,MYO1B,SPP1	18 (11)
CCND1	0.64	transcription regulator		0		0.00834	CCND1,ENO1,RCN1,SPP1
trichloroethylene		chemical toxicant				0.00853	ID2,RTN4
MAP2K4		kinase				0.00853	CCND1,CRP	10 (4)
PTK2		kinase				0.00853	CCND1,SPP1	25 (15)
ZEB2		transcription regulator				0.00853	CCND1,ID2
benzene		chemical toxicant				0.00853	ID2,RTN4
IL11		cytokine				0.00882	CRP,SPP1
HOXA9		transcription regulator				0.00892	GMNN,ID2,SPP1
FOXO3		transcription regulator				0.00895	CCND1,GMNN,RTN4,TGFB2
cadmium chloride		chemical toxicant				0.00911	CCND1,CRP	10 (4)
capsaicin		chemical drug				0.00911	CCND1,TGFB2
Mek		group				0.00913	APOE,CCND1,ID2,MME	7 (5)
torin1		chemical reagent				0.00933	ALDOC,CCND1,ENO1
trans-hydroxytamoxifen		chemical drug				0.00933	APOE,MYO1B,TGFB2
CXCR4		G-protein coupled receptor				0.0094	CCND1,ID2
HIC1		transcription regulator				0.0094	CCND1,SPP1
vitamin D		chemical drug				0.0094	ADAMTS1,SPP1
2-(4-amino-1-isopropyl-1H-pyrazolo[3,4-d]pyrimidin-3-yl)-1H-indol-5-ol		chemical reagent				0.00947	ADAMTS1,CCND1,GMNN
KLF2		transcription regulator				0.00947	CRP,PTGDS,TGFB2
EGF		growth factor		1.898	bias	0.0095	CCND1,HES1,ID2,Scd2,SPP1	32 (18)
CGP 74514A		chemical - kinase inhibitor				0.00954	CCND1
inecalcitol		chemical drug				0.00954	CCND1
L-alanine		chemical - endogenous mammalian				0.00954	CCND1
CINP		other				0.00954	CCND1
ATP8B1		transporter				0.00954	CFTR
DNAJB4		other				0.00954	CCND1
Meg3		other				0.00954	HES1
TEX11		other				0.00954	CCND1
Slfn1		enzyme				0.00954	CCND1
receptor protein tyrosine kinase		group				0.00954	SPP1
ORAI3		other				0.00954	CCND1
MUCL1		other				0.00954	CCND1
SLC39A4		transporter				0.00954	CCND1
DACT3		other				0.00954	CCND1
EIF3I		translation regulator				0.00954	CCND1
ENPP1		enzyme				0.00954	SPP1
TLCD3A		other				0.00954	CCND1
CDC25B		phosphatase				0.00954	CCND1
ADRA2B		G-protein coupled receptor				0.00954	CCND1
miR-191-5p (and other miRNAs w/seed AACGGAA)		mature microRNA				0.00954	CRP
CBFA2T2		transcription regulator				0.00954	HES1
ANKH		transporter				0.00954	SPP1
SEPTIN9		enzyme				0.00954	CCND1
GALR1		G-protein coupled receptor				0.00954	CCND1
parbendazole		chemical reagent				0.00954	SPP1
DLL3		other				0.00954	HES1
UBTF		transcription regulator				0.00954	CCND1
CTNNAL1		other				0.00954	CCND1
CDKN2D		transcription regulator				0.00954	PEBP1
SNRK		kinase				0.00954	CCND1
RAPGEF4		other				0.00954	SPP1
PHC1		transcription regulator				0.00954	GMNN
2-[[4-[(e)-styryl]phenoxy]methyl]oxirane		chemical reagent				0.00954	APOE
S3I-1757		chemical reagent				0.00954	CCND1
PLAC8		other				0.00954	CCND1
CEBPZ		transcription regulator				0.00954	CRP
SLC9A3R2		transporter				0.00954	CCND1
ARF1		enzyme				0.00954	CCND1
SLC20A2		transporter				0.00954	SPP1
DNM2		enzyme				0.00954	CFTR
LY5		chemical reagent				0.00954	CCND1
carboxyamido-triazole		chemical drug				0.00954	CCND1
acetoacetic acid		chemical - endogenous mammalian				0.00954	CCND1
tirapazamine		chemical drug				0.00954	SPP1
KP-SD-1		chemical - kinase inhibitor				0.00954	CCND1
sodium phosphate		chemical drug				0.00954	SPP1
durapatite		chemical - endogenous mammalian				0.00954	SPP1
gemcabene		chemical drug				0.00954	APOE
L-asparagine		chemical - endogenous mammalian				0.00954	CCND1
Collagen type VI		complex				0.00954	CCND1
DP-001		chemical drug				0.00954	SPP1
rubitecan		chemical drug				0.00954	PEBP1
FLI1		transcription regulator				0.0097	CCND1,ID2
IL4		cytokine		1.131	bias	0.00975	ALDOC,APOE,CCND1,LIFR,PIGR,Scd2,SPP1	28 (15)
NKX2-1		transcription regulator				0.00976	MIA,QSOX1,TGFB2
IL1		group		1.651	bias	0.00998	ADAMTS1,APOE,CRP,PIGR	15 (7)
BCL3		transcription regulator				0.01	CCND1,ID2
ATP5IF1		other				0.01	DBI,FMO1
8-bromo-cAMP		chemical reagent				0.0102	CCND1,SPP1,TGFB2
PLN		transporter				0.0103	ENO1,HES1
IRF1		transcription regulator				0.0103	CCND1,CFTR,PIGR
PDX1		transcription regulator				0.0105	CCND1,ID2,SPP1
tributyrin		chemical drug				0.0106	ID2,MME
ursodeoxycholic acid		chemical - endogenous mammalian				0.0106	SPP1,TGFB2
NRG2		growth factor				0.0106	HES1,LIFR
lomustine		chemical drug				0.0106	RCN1,SPP1
PRKCD		kinase				0.0106	CCND1,LBH,NAV2
MAPK14		kinase				0.0108	CCND1,CRP,SPP1
EGLN1		enzyme				0.0109	HES1,TGFB2
MBD2		transcription regulator				0.0109	APOE,OAT
methylmercury		chemical toxicant				0.0109	ID2,RTN4
hydroxyurea		chemical drug				0.0109	CCND1,GMNN
mir-8		microRNA				0.0109	ADAMTS1,CCND1,TGFB2
RARA		ligand-dependent nuclear receptor				0.0112	CCND1,LIFR,NAV2,SPP1
RORA		ligand-dependent nuclear receptor				0.0113	APOE,Cald1,Scd2
bexarotene		chemical drug				0.0113	APOE,CCND1,TGFB2
CG		complex		1.96	bias	0.0113	ADAMTS1,DBI,SPP1,TGFB2
testosterone		chemical - endogenous mammalian		0.176	bias	0.0113	CCND1,CRP,OAT,TGFB2
Collagen type I (complex)		complex				0.0116	APOE,CCND1
gemcitabine		chemical drug				0.0116	CCND1,PEBP1
Ngf		group				0.0116	CCND1,TGFB2
GATA6		transcription regulator				0.0119	Cald1,HES1,TGFB2
Raf		group				0.0119	CCND1,ID2
FANCC		other				0.0119	HES1,OAT
DKK1		growth factor				0.0119	CCND1,LBH
SOX9		transcription regulator				0.0119	MIA,PTGDS
p38 Sapk		group				0.0119	CCND1
L-aspartic acid		chemical - endogenous mammalian				0.0119	CCND1
ILX-23-7553		chemical drug				0.0119	CCND1
RNF187		enzyme				0.0119	CCND1
TOX		transcription regulator				0.0119	ID2
KLF8		transcription regulator				0.0119	CCND1
ZMIZ2		transcription regulator				0.0119	CCND1
CUZD1		other				0.0119	ID2
TTYH1		ion channel				0.0119	HES1
CDH16		enzyme				0.0119	CCND1
CREB3L4		transcription regulator				0.0119	ID2
2,3-bis(3'-hydroxybenzyl)butane-1,4-diol		chemical - endogenous mammalian				0.0119	SPP1
Cathepsin		group				0.0119	CCND1
FZD7		G-protein coupled receptor				0.0119	CCND1
MCF2		other				0.0119	CCND1
mir-338		microRNA				0.0119	CCND1
HPGDS		enzyme				0.0119	PTGDS
GAS7		transcription regulator				0.0119	SPP1
WSB1		other				0.0119	ALDOC
rigosertib		chemical drug				0.0119	CCND1
RBM14		transcription regulator				0.0119	CCND1
FLOT1		other				0.0119	CCND1
WNK4		kinase				0.0119	CFTR
PSAP		enzyme				0.0119	CCND1
PORCN		enzyme				0.0119	CCND1
BCAR3		other				0.0119	CCND1
CEL		enzyme				0.0119	CCND1
RTN4R		transmembrane receptor				0.0119	RTN4
HEPH		transporter				0.0119	RTN4
PRMT2		enzyme				0.0119	CCND1
ECT2		other				0.0119	CCND1
VCAM1		transmembrane receptor				0.0119	CCND1
CDC27		other				0.0119	CCND1
CDH13		other				0.0119	CCND1
Cox5b		other				0.0119	TGFB2
KRT10		other				0.0119	CCND1
Muc1		transmembrane receptor				0.0119	CCND1
TWSG1		other				0.0119	ID2
CLDN2		other				0.0119	CCND1
scoparone		chemical - endogenous non-mammalian				0.0119	CCND1
silicon phthalocyanine		chemical drug				0.0119	CCND1
4-aminophenol		chemical - endogenous mammalian				0.0119	SPP1
retinaldehyde		chemical - endogenous mammalian				0.0119	PTGDS
thapsigargin		chemical toxicant				0.0121	CCND1,LBH,LIFR
TCR		complex				0.0122	APOE,CCND1,ENO1,SPP1
PKM		kinase				0.0126	CCND1,ENO1
2-deoxyglucose		chemical drug				0.0126	CCND1,SPP1
PPARGC1B		transcription regulator				0.0129	CCND1,ENO1
PTHLH		other				0.0129	ADAMTS1,CCND1
RC3H1		enzyme				0.0129	ENO1,SPP1
MEF2D		transcription regulator				0.0129	CCND1,TGFB2
Akt		group		1.97	bias	0.0131	CCND1,HES1,MME,SPP1
tetrachlorodibenzodioxin		chemical toxicant				0.0131	CCND1,HES1,KCNE3,TGFB2
heparin		chemical - endogenous mammalian				0.0133	APOE,CCND1
KDM8		enzyme				0.0133	ENO1,HS6ST2
SOX1		transcription regulator				0.0133	HES1,TGFB2
tyrphostin AG 1478		chemical - kinase inhibitor				0.0133	CCND1,MME
MAPT		other				0.0133	CCND1,DBI,ENO1,PEBP1
EIF4E		translation regulator				0.0134	CCND1,GPX2,MIA
atorvastatin		chemical drug				0.0137	APOE,CRP,SPP1
CD44		other				0.0139	CCND1,MYO1B,SPP1
NTRK2		kinase				0.014	CCND1,SPP1
vanillyl-N-nonylamide		chemical drug				0.0143	CCND1
DBH-AS1		other				0.0143	CCND1
BICC1		other				0.0143	PIGR
EIF4A3		enzyme				0.0143	CCND1
ZMIZ1		transcription regulator				0.0143	HES1
ANKHD1/ANKHD1-EIF4EBP3		other				0.0143	CCND1
Crnde		other				0.0143	CCND1
BPIFB1		other				0.0143	CCND1
EN2		transcription regulator				0.0143	ALDOC
Ap2 alpha		group				0.0143	PTGDS
RO4929097		chemical drug				0.0143	HES1
PXN		other				0.0143	CCND1
PLSCR1		enzyme				0.0143	CCND1
BAD		other				0.0143	CCND1
Pzp		other				0.0143	APOE
SLC7A11-AS1		other				0.0143	CCND1
mir-637		microRNA				0.0143	CCND1
EGFL7		other				0.0143	HES1
SNIP1		other				0.0143	CCND1
THBS2		other				0.0143	HES1
ETV3		transcription regulator				0.0143	SPP1
TRPC3		ion channel				0.0143	CCND1
SIX3		transcription regulator				0.0143	CCND1
CFH		other				0.0143	CRP
STX2		transporter				0.0143	CCND1
TFF2		other				0.0143	CCND1
YWHAB		other				0.0143	CCND1
Ppp1cc		phosphatase				0.0143	ID2
OMP-52M51		biologic drug				0.0143	HES1
CXXC4		other				0.0143	CCND1
ZYX		other				0.0143	Cald1
CIMO		chemical reagent				0.0143	CCND1
ambroxol		chemical drug				0.0143	CFTR
pyridoxamine		chemical - endogenous mammalian				0.0143	CRP
dibenzoylmethane		chemical toxicant				0.0143	CCND1
GSI34		chemical reagent				0.0143	CCND1
Z-VEID-FMK		chemical reagent				0.0143	CCND1
3',4',7-trihydroxyisoflavone		chemical - endogenous non-mammalian				0.0143	CCND1
CHUK		kinase				0.0145	CCND1,LIFR,SPP1
RBL1		transcription regulator				0.0147	CCND1,HES1
cyclophosphamide		chemical drug				0.0147	GPX2,SPP1
cerivastatin		chemical drug				0.0147	DBI,PTGDS
LDLR		transporter				0.015	APOE,CCND1,SPP1
Notch		group				0.015	HES1,ID2
PRKCE		kinase				0.015	CCND1,CRP
IFI16		transcription regulator				0.015	CCND1,ID2
RAF1		kinase				0.0152	CCND1,CRP,LIFR
HDAC5		transcription regulator				0.0154	HES1,MMD2
SREBF2		transcription regulator				0.0154	ALDOC,DBI
ciglitazone		chemical drug				0.0154	APOE,CCND1
carbon tetrachloride		chemical toxicant				0.0156	APOE,SPP1,TGFB2
ethanol		chemical - endogenous mammalian		0.845	bias	0.0156	CCND1,CRP,MME,TGFB2
Gsk3		group				0.0158	CCND1,SPP1
PIN1		enzyme				0.0158	CCND1,HES1
C3		peptidase				0.0158	APOE,CRP
N-Ac-Leu-Leu-norleucinal		chemical - protease inhibitor				0.0158	CCND1,Scd2
IgG		complex				0.0159	APOE,DEGS1,ECSCR
genistein		chemical drug		1.015	bias	0.016	CCND1,CFTR,ID2,SPP1
Rb		group				0.0161	CCND1,GMNN
JUND		transcription regulator				0.0161	CCND1,SPP1
GAST		other				0.0161	CCND1,HES1
sodium chloride		chemical - endogenous mammalian				0.0161	CRP,SPP1
let-7		microRNA				0.0163	CCND1,GMNN,ID2
FFAR3		G-protein coupled receptor				0.0165	CBS/CBSL,RCN1
MBD3		other				0.0165	APOE,CCND1
L-proline		chemical - endogenous mammalian				0.0166	CCND1
24(S),25-epoxycholesterol		chemical - endogenous mammalian				0.0166	APOE
ISX		transcription regulator				0.0166	CCND1
ZNF652		other				0.0166	TGFB2
AKIRIN2		other				0.0166	CCND1
C1orf61		other				0.0166	CCND1
ATE1		enzyme				0.0166	CCND1
CACNA1C		ion channel				0.0166	ENO1
HNRNPR		other				0.0166	Cald1
RAP1GAP		other				0.0166	CCND1
CCN4		other				0.0166	CCND1
BANP		other				0.0166	CCND1
CBR3-AS1		other				0.0166	CCND1
RAX		transcription regulator				0.0166	HES1
DAB2		other				0.0166	CCND1
PDE3A		enzyme				0.0166	CCND1
BANCR		other				0.0166	CCND1
KHDRBS1		transcription regulator				0.0166	CCND1
G3BP1		enzyme				0.0166	SPP1
FZD5		G-protein coupled receptor				0.0166	SPP1
MIB1		enzyme				0.0166	HES1
SHCBP1		other				0.0166	CCND1
CAPNS1		peptidase				0.0166	CCND1
ITGB8		other				0.0166	APOE
SNW1		transcription regulator				0.0166	CCND1
Elf5		transcription regulator				0.0166	Wfdc18
TNIK		kinase				0.0166	CCND1
Gm26313		other				0.0166	Cald1
temsirolimus		chemical drug				0.0166	CCND1
aminoglutethimide		chemical drug				0.0166	SPP1
polyphosphate		chemical - endogenous mammalian				0.0166	SPP1
retroinverso ERG inhibitory peptide 2		chemical reagent				0.0166	ADAMTS1
retroinverso ERG inhibitory peptide 1		chemical reagent				0.0166	ADAMTS1
cyclosporin		biologic drug				0.0166	CCND1
non-esterified fatty acid		chemical - endogenous mammalian				0.0166	APOE
20alpha-hydroxycholesterol		chemical - endogenous mammalian				0.0166	APOE
NR1H3		ligand-dependent nuclear receptor				0.0167	Apoc1,APOE,CRP
PAX3-FOXO1		fusion gene/product				0.0167	CCND1,DBI,SPP1
AGN194204		chemical drug				0.0169	LIFR,Scd2,SPP1
CNTF		cytokine				0.0169	CRP,LIFR
zinc		chemical drug				0.0169	CCND1,ENO1
SCAP		other				0.0173	ALDOC,Scd2
SPIB		transcription regulator				0.0173	APOE,NAV2
IL2		cytokine				0.0177	CCND1,LIFR,MME,RCN1,SPP1
mycophenolic acid		chemical drug				0.0177	ID2,MME
PIK3R1		kinase				0.0181	CCND1,TGFB2
Growth hormone		group				0.0183	APOE,CCND1,SPP1
PRDM5		transcription regulator				0.0185	ID2,NAV2
TFRC		transporter				0.0185	ID2,TGFB2
NFYA		transcription regulator				0.0185	CBS/CBSL,Scd2
MAPK3		kinase				0.0185	CCND1,SPP1
WT1		transcription regulator				0.0187	CBS/CBSL,CCND1,Scd2
IKBKE		kinase				0.0189	ALDOC,CCND1
cholesterol		chemical - endogenous mammalian				0.0189	APOE,DBI,MME
Vhl		complex				0.019	CCND1
pyrophosphate		chemical - endogenous mammalian				0.019	SPP1
N-Cadherin		group				0.019	CCND1
rhodamine 6G		chemical toxicant				0.019	CCND1
L-type Calcium Channel		complex				0.019	APOE
UCA1		other				0.019	CCND1
LINC00461		other				0.019	CCND1
Retinoic acid-RAR-RXR		complex				0.019	TGFB2
1,3-bis(4-hydroxyphenyl)-4-methyl-5-[4-(2-piperidinylethoxy)phenol]-1H-pyrazole		chemical reagent				0.019	CCND1
VTCN1		other				0.019	CCND1
FOXD2-AS1		other				0.019	HES1
TACSTD2		other				0.019	CCND1
ARHGEF1		other				0.019	CCND1
evofosfamide		chemical drug				0.019	CCND1
PDLIM7		other				0.019	SPP1
FANCA		other				0.019	HES1
MAP3K12		kinase				0.019	CRP
STC1		kinase				0.019	TGFB2
S100a7a		other				0.019	CCND1
CXCR1		G-protein coupled receptor				0.019	CCND1
MAOA		enzyme				0.019	CCND1
MFGE8		other				0.019	CCND1
DES		other				0.019	SPP1
ARAF		kinase				0.019	CCND1
DGKZ		kinase				0.019	CCND1
WNT7B		other				0.019	CCND1
MSI1		other				0.019	HES1
PPP1CA		phosphatase				0.019	SPP1
PIWIL2		enzyme				0.019	CCND1
SULF1		enzyme				0.019	CCND1
CCDC80		other				0.019	CCND1
RBCK1		transcription regulator				0.019	CCND1
cariporide		chemical drug				0.019	SPP1
naproxen		chemical drug				0.019	CCND1
mechlorethamine		chemical drug				0.019	ID2
vandetanib		chemical drug				0.019	CCND1
5-nitro-2-(3-phenylpropylamino)benzoic acid		chemical reagent				0.019	CCND1
PCM1-JAK2		fusion gene/product				0.019	HS6ST2
JNJ-39933673		chemical reagent				0.019	SPP1
artemisinin		chemical drug				0.019	CCND1
P1,P4-Di(adenosine-5') tetraphosphate		chemical - endogenous mammalian				0.019	TGFB2
mir-29		microRNA				0.0193	ADAMTS9,CCND1
REL		transcription regulator				0.0194	CCND1,CLDN10,PTGDS
ZFHX3		transcription regulator				0.0197	CCND1,ID2
hemin		chemical - endogenous mammalian				0.0197	CCND1,SPP1
actinomycin D		biologic drug				0.0198	CCND1,ID2,SPP1
N-acetyl-L-cysteine		chemical drug				0.0198	CCND1,CFTR,SPP1
GDF2		growth factor				0.0201	ID2,SPP1
CCL2		cytokine				0.0201	CCND1,PTGDS
BCR-ABL1		fusion gene/product				0.0201	CCND1,MME
FGF8		growth factor				0.0205	CCND1,SPP1
SMAD4		transcription regulator				0.0207	CCND1,ID2,TGFB2
methotrexate		chemical drug				0.0207	CCND1,CRP,SPP1
AG490		chemical - kinase inhibitor				0.0209	CFTR,SPP1
elaidic acid		chemical - endogenous mammalian				0.0209	APOE,DBI
lenalidomide		chemical drug				0.0211	CCND1,ENO1,HILPDA
gentamicin		chemical drug				0.0211	CBS/CBSL,FMO1,SPP1
IL33		cytokine				0.0211	ADAMTS1,APOE,CCND1
6-amino-4-(4-phenoxyphenylethylamino)quinazoline		chemical reagent				0.0213	APOE
MSGN1		transcription regulator				0.0213	HES1
Mir218		microRNA				0.0213	SPP1
(-)-epicatechin gallate		chemical - endogenous non-mammalian				0.0213	SPP1
Bcl9-Cbp/p300-Ctnnb1-Lef/Tcf		complex				0.0213	CCND1
BMS-387032		chemical drug				0.0213	CCND1
MEMO1		other				0.0213	CCND1
SMAD1/5		group				0.0213	ID2
VWF		other				0.0213	HES1
AKAP12		transporter				0.0213	CCND1
LIMS1		other				0.0213	TGFB2
MED15		transcription regulator				0.0213	CCND1
PRKCG		kinase				0.0213	CCND1
salinomycin		chemical - endogenous non-mammalian				0.0213	CCND1
genipin		chemical - endogenous non-mammalian				0.0213	CCND1
WNT5B		other				0.0213	CCND1
CCND2		other				0.0213	CCND1
MSH2		enzyme				0.0213	CCND1
PINK1		kinase				0.0213	CCND1
YBX3		transcription regulator				0.0213	CCND1
BRMS1		transcription regulator				0.0213	SPP1
RECK		other				0.0213	CCND1
thiocoraline		chemical reagent				0.0213	HES1
cyclopentenone		chemical reagent				0.0213	CCND1
JMF3086		chemical reagent				0.0213	CCND1
I-BOP		chemical reagent				0.0213	CCND1
lead acetate		chemical toxicant				0.0213	CCND1
PDLIM2		other				0.0214	CCND1,MME
GPD1		enzyme				0.0214	CCND1,LIFR
ATF2		transcription regulator				0.0214	CCND1,TGFB2
desmopressin		biologic drug				0.0214	ENO1,MME
butyric acid		chemical - endogenous mammalian				0.0217	CBS/CBSL,CCND1,PTGDS,SPP1
FGFR1		kinase				0.0218	CCND1,HES1
OGT		enzyme				0.0218	CCND1,LBH
okadaic acid		chemical toxicant				0.0218	CCND1,SPP1
SLC25A13		transporter				0.0222	CCND1,LIFR
methylselenic acid		chemical reagent				0.0225	ADAMTS1,CCND1,ID2
cyclosporin A		biologic drug		0.831	bias	0.0225	APOE,CCND1,GPX2,SPP1
HDAC3		transcription regulator				0.0227	CCND1,SPP1
RUNX1-RUNX1T1		fusion gene/product				0.0227	ID2,KCNE3
ASPSCR1-TFE3		fusion gene/product				0.0227	APOE,OLFML2A
PC-SPES		chemical drug				0.0227	CCND1,QSOX1
CEBPA		transcription regulator		0.038	bias	0.0229	CCND1,ID2,SPP1,TGFB2
eicosapentenoic acid		chemical drug				0.0231	APOE,TGFB2
ETV5		transcription regulator				0.0235	CCND1,SPP1
clofibrate		chemical drug				0.0235	CCND1,RTN4
TEAD		group				0.0237	CCND1
L-threonine		chemical - endogenous mammalian				0.0237	CCND1
CAMK2N2		other				0.0237	CCND1
PARP		group				0.0237	APOE
NQO2		enzyme				0.0237	CCND1
RBPJL		transcription regulator				0.0237	HES1
TRPM8		ion channel				0.0237	GPX2
JMJD6		transmembrane receptor				0.0237	CCND1
cercosporin		chemical - endogenous non-mammalian				0.0237	CCND1
PPM1D		phosphatase				0.0237	CCND1
NMNAT1		enzyme				0.0237	TGFB2
MLH1		enzyme				0.0237	CCND1
SETD7		enzyme				0.0237	CCND1
Sry		transcription regulator				0.0237	PTGDS
EXT1		enzyme				0.0237	CCND1
IQGAP1		other				0.0237	CCND1
GNA11		enzyme				0.0237	ADAMTS1
DHH		peptidase				0.0237	ADAMTS1
AEBP1		peptidase				0.0237	APOE
CDKN1C		other				0.0237	CCND1
FUS		transcription regulator				0.0237	CCND1
ARID4B		transcription regulator				0.0237	PTGDS
S100P		other				0.0237	CCND1
PRKCH		kinase				0.0237	CCND1
gamma-secretase inhibitor XX		chemical reagent				0.0237	HES1
2-hydroxy-1-naphthylaldehyde isonicotinoyl hydrazone		chemical reagent				0.0237	CCND1
quinidine		chemical drug				0.0237	CCND1
SS18-SSX1		fusion gene/product				0.0237	CCND1
CEBPD		transcription regulator				0.0244	CCND1,MIA
RPTOR		other				0.0244	CCND1,ENO1
NS-398		chemical reagent				0.0244	CCND1,SPP1
ERBB2		kinase		1.183	bias	0.0248	ALDOC,CCND1,HES1,ID2,MME,Wfdc18
IL17A		cytokine				0.0251	CCND1,CRP,FMO1
F2R		G-protein coupled receptor				0.0253	CCND1,TGFB2
SOD2		enzyme				0.0253	ID2,NCALD
NR1H2		ligand-dependent nuclear receptor				0.0253	APOE,CRP
TAZ		enzyme				0.0253	ADAMTS1,ALDOC
CGA		other				0.0258	ADAMTS1,CCND1
cyclic AMP		chemical - endogenous mammalian				0.0259	CCND1,MME,OAT
L-serine		chemical - endogenous mammalian				0.026	CCND1
echinomycin		chemical drug				0.026	ADAMTS1
Adaptor protein 2		complex				0.026	PIGR
SNHG20		other				0.026	CCND1
OIP5-AS1		other				0.026	CCND1
Cebp		complex				0.026	MIA
MCL1		transporter				0.026	CCND1
ACVR2A		kinase				0.026	ID2
DYRK1B		kinase				0.026	CCND1
miR-208a-3p (and other miRNAs w/seed UAAGACG)		mature microRNA				0.026	SPP1
miR-193a-3p (and other miRNAs w/seed ACUGGCC)		mature microRNA				0.026	CCND1
miR-142-3p (and other miRNAs w/seed GUAGUGU)		mature microRNA				0.026	LIFR
PTCSC3		other				0.026	CCND1
RUVBL2		transcription regulator				0.026	CCND1
LNX2		other				0.026	HES1
ARID4A		transcription regulator				0.026	PTGDS
2-[[9-isopropyl-6-[[4-(2-pyridyl)phenyl]methylamino]purin-2-yl]amino]butan-1-ol		chemical - kinase inhibitor				0.026	CCND1
UBR5		enzyme				0.026	CCND1
doxazosin		chemical drug				0.026	SPP1
bosutinib		chemical drug				0.026	CCND1
clioquinol		chemical drug				0.026	CCND1
7-(4-fluorobenzylamino)-1,3,4,8-tetrahydropyrrolo[4,3,2-de]quinolin-8(1H)-one		chemical reagent				0.026	CCND1
SS18-SSX2		fusion gene/product				0.026	CCND1
adaphostin		chemical drug				0.026	CCND1
3,5-diiodothyronine		chemical - endogenous mammalian				0.026	ENO1
dextran		chemical drug				0.026	APOE
desmosterol		chemical - endogenous mammalian				0.026	Scd2
trestolone		chemical drug				0.026	LIFR
canrenoate potassium		chemical drug				0.026	SPP1
Cu2+		chemical - endogenous mammalian				0.026	CCND1
PTEN		phosphatase		-1.111		0.0262	CCND1,DEGS1,MME,SPP1,Wfdc18
KAT5		transcription regulator				0.0262	CCND1,CFTR
LDL		complex				0.0264	APOE,CBS/CBSL,CCND1
Ca2+		chemical - endogenous mammalian				0.0264	CCND1,PEBP1,SPP1
NFATC1		transcription regulator				0.0267	CCND1,SPP1
GLI2		transcription regulator				0.0272	CCND1,SPP1
phenethyl isothiocyanate		chemical drug				0.0272	CCND1,QSOX1
Histone h3		group				0.0274	CCND1,HES1,ID2,SPP1
VIP		other				0.0276	CCND1,CFTR
BCL2		transporter				0.0276	CCND1,TGFB2
embelin		chemical - endogenous non-mammalian				0.0284	CCND1
CLEC1B		transmembrane receptor				0.0284	SPP1
E2F8		transcription regulator				0.0284	CCND1
S100A12		other				0.0284	CCND1
STAR		transporter				0.0284	SPP1
PAK4		kinase				0.0284	LIFR
CTNNBIP1		other				0.0284	CCND1
CIC		transcription regulator				0.0284	CCND1
UBA1		enzyme				0.0284	CCND1
miR-451a (and other miRNAs w/seed AACCGUU)		mature microRNA				0.0284	CCND1
RB1CC1		other				0.0284	CCND1
LIMA1		other				0.0284	ID2
LMO4		transcription regulator				0.0284	CCND1
CCNT1		transcription regulator				0.0284	CCND1
PAX4		transcription regulator				0.0284	ID2
SRY		transcription regulator				0.0284	PTGDS
KRIT1		other				0.0284	TGFB2
BEX2		other				0.0284	SPP1
PITX1		transcription regulator				0.0284	CCND1
HNRNPAB		enzyme				0.0284	SPP1
clotrimazole		chemical drug				0.0284	CCND1
myristoylated protein kinase A inhibitor 14-22 amide		chemical - kinase inhibitor				0.0284	CCND1
RRP1B		transcription regulator				0.0286	CCND1,SPP1
laquinimod		chemical drug				0.0286	ADAMTS9,OLFML2A
FOXO4		transcription regulator				0.0286	CCND1,Scd2
diethylnitrosamine		chemical toxicant				0.0291	CCND1,OAT
SYK		kinase				0.0296	CCND1,CFTR
RET		kinase				0.0301	CCND1,RTN4
GNA15		enzyme				0.0301	FMO1,HES1
L-glutamic acid		chemical - endogenous mammalian				0.0305	CCND1,Scd2
ATP		chemical - endogenous mammalian				0.0305	ADAMTS9,CCND1
hyaluronic acid		chemical - endogenous mammalian				0.0305	SPP1,TGFB2
Rxr		group				0.0305	APOE,SPP1
CCR2		G-protein coupled receptor				0.0305	PRELP,TGFB2
PGR		ligand-dependent nuclear receptor				0.0306	ADAMTS1,CCND1,HES1
neomycin		chemical drug				0.0307	HES1
dehydroepiandrosterone sulfate		chemical - endogenous mammalian				0.0307	CCND1
desoxycorticosterone		chemical - endogenous mammalian				0.0307	SPP1
ladostigil		chemical drug				0.0307	ALDOC
LXR ligand-LXR-Retinoic acid-RXRα		complex				0.0307	APOE
perhexiline		chemical drug				0.0307	HES1
CLEC10A		other				0.0307	CRP
ERFE		other				0.0307	ID2
GPBAR1		G-protein coupled receptor				0.0307	CCND1
CSNK2B		kinase				0.0307	CCND1
HBP1		transcription regulator				0.0307	CCND1
JARID2		transcription regulator				0.0307	CCND1
BCAR1		enzyme				0.0307	CCND1
XRCC5		enzyme				0.0307	APOE
AIF1		other				0.0307	CCND1
LMX1A		transcription regulator				0.0307	HES1
AK1		kinase				0.0307	ENO1
FZR1		kinase				0.0307	CCND1
VEGFD		growth factor				0.0307	CCND1
PPP5C		phosphatase				0.0307	CCND1
CAMKK2		kinase				0.0307	CCND1
vatalanib		chemical drug				0.0307	CCND1
1,2-dimethylhydrazine		chemical toxicant				0.0307	CCND1
4-hydroxycinnamyl aldehyde		chemical - endogenous non-mammalian				0.0307	MIA
gambogic acid		chemical - endogenous non-mammalian				0.0307	CCND1
PPARG		ligand-dependent nuclear receptor		1.005	bias	0.0308	APOE,CCND1,HES1,SPP1
losartan potassium		chemical drug				0.031	SPP1,TGFB2
YY1		transcription regulator				0.0311	CFTR,ID2,TGFB2
geldanamycin		chemical - endogenous non-mammalian				0.0314	CCND1,LBH,QSOX1
IKBKB		kinase				0.0319	Cald1,CCND1,LIFR
RAC1		enzyme				0.032	CCND1,CRP
5'-methylthioadenosine		chemical - endogenous mammalian				0.033	CCND1
GON4L		transcription regulator				0.033	CCND1
Rac		group				0.033	CCND1
dihydroartemisinin		chemical drug				0.033	CCND1
IDH2		enzyme				0.033	TGFB2
NAE1		enzyme				0.033	CCND1
PECAM1		other				0.033	CCND1
MK2206		chemical drug				0.033	CCND1
NDUFA13		enzyme				0.033	CCND1
GHRHR		G-protein coupled receptor				0.033	CCND1
TFCP2		transcription regulator				0.033	SPP1
RLN2		other				0.033	TGFB2
COX4I1		enzyme				0.033	TGFB2
SRSF3		other				0.033	CCND1
MGAT3		enzyme				0.033	HES1
TRAF4		other				0.033	CCND1
IQGAP2		other				0.033	CCND1
LAMC1		other				0.033	TGFB2
GABBR1		G-protein coupled receptor				0.033	SPP1
GTF2I		transcription regulator				0.033	CCND1
picryl chloride		chemical toxicant				0.033	SPP1
salmeterol		chemical drug				0.033	CFTR
N1,N11-diethylnorspermine		chemical drug				0.033	CCND1
anti-benzo(a)pyrene-diol-epoxide		chemical toxicant				0.033	CCND1
hyperforin		chemical drug				0.033	SPP1
noscapine		chemical drug				0.033	CCND1
cyproterone acetate		chemical drug				0.033	CCND1
onapristone		chemical drug				0.033	ADAMTS1
Cd2+		chemical toxicant				0.033	CCND1
1,4-bis[2-(3,5-dichloropyridyloxy)]benzene		chemical toxicant				0.033	CCND1,RTN4
oleic acid		chemical - endogenous mammalian				0.033	APOE,DEGS1
mir-155		microRNA				0.0336	CCND1,MME
JQ1		chemical reagent				0.0336	CCND1,CFTR
Alpha catenin		group				0.0341	ADAMTS1,RHOJ
Ifn		group				0.0341	ADAMTS1,SPP1
resveratrol		chemical drug				0.0345	CCND1,SPP1,TGFB2
GSK3B		kinase				0.0346	CCND1,SPP1
glucocorticoid		chemical drug				0.0348	PIGR,SPP1,TGFB2
PARP1		enzyme				0.0351	CCND1,HES1
MIF		cytokine				0.0351	CCND1,CRP
lithium chloride		chemical drug				0.0351	CCND1,HES1
amphotericin B		chemical drug				0.0353	SPP1
nystatin		chemical drug				0.0353	SPP1
lonafarnib		chemical drug				0.0353	CCND1
1'-acetoxychavicol acetate		chemical reagent				0.0353	CCND1
THRAP3		transcription regulator				0.0353	CCND1
TCF/LEF		group				0.0353	CCND1
FNDC5		other				0.0353	SPP1
48s		complex				0.0353	CCND1
Nkx2-2os		other				0.0353	CCND1
IGFBP7		transporter				0.0353	CCND1
Retnla		other				0.0353	HES1
Betacatenin/TCF		complex				0.0353	CCND1
PLCG1		enzyme				0.0353	CCND1
POU3F2		transcription regulator				0.0353	ALDOC
CDH2		other				0.0353	CCND1
miR-19b-3p (and other miRNAs w/seed GUGCAAA)		mature microRNA				0.0353	CCND1
miR-128-3p (and other miRNAs w/seed CACAGUG)		mature microRNA				0.0353	DBI
PER2		transcription regulator				0.0353	CCND1
TBX3		transcription regulator				0.0353	LBH
HOXC9		transcription regulator				0.0353	SPP1
CAPN3		peptidase				0.0353	GPX2
KIF1B		transporter				0.0353	CCND1
SP2		transcription regulator				0.0353	CCND1
SP7		transcription regulator				0.0353	SPP1
L-685,458		chemical - protease inhibitor				0.0353	HES1
pimozide		chemical drug				0.0353	CCND1
amlodipine		chemical drug				0.0353	ENO1
zinc protoporphyrin IX		chemical - endogenous mammalian				0.0353	CCND1
gamma-tocotrienol		chemical drug				0.0353	CCND1
24-hydroxycholesterol		chemical - endogenous mammalian				0.0353	APOE
LIPE		enzyme				0.0356	ID2,Scd2
C5		cytokine				0.0356	CCND1,CRP
VEGFA		growth factor				0.036	ADAMTS1,CCND1,HES1
corticosterone		chemical - endogenous mammalian				0.0367	Cald1,CCND1
STAT5a/b		group				0.0367	CCND1,ID2
celecoxib		chemical drug				0.0367	CCND1,CRP
ERK1/2		group				0.0372	CCND1,ENO1,SPP1
paclitaxel		chemical drug				0.0372	CCND1,CRP,PRELP
HMOX1		enzyme				0.0372	CCND1,TGFB2
prostaglandin A2		chemical - endogenous non-mammalian				0.0376	CCND1
epoprostenol		chemical - endogenous mammalian				0.0376	SPP1
Stat5 dimer		complex				0.0376	CCND1
TMEM8B		other				0.0376	CCND1
BMP10		growth factor				0.0376	ID2
NTF4		growth factor				0.0376	SPP1
C1QBP		transcription regulator				0.0376	CCND1
PMP22		other				0.0376	APOE
KLF9		transcription regulator				0.0376	CCND1
H1-2		other				0.0376	CCND1
miR-100-5p (and other miRNAs w/seed ACCCGUA)		mature microRNA				0.0376	CCND1
SFRP4		transmembrane receptor				0.0376	CCND1
EPHX2		enzyme				0.0376	HES1
DIRAS3		enzyme				0.0376	CCND1
OSBPL8		transporter				0.0376	APOE
MEL T1		chemical - kinase inhibitor				0.0376	ENO1
PRDX2		enzyme				0.0376	CCND1
101.10 peptide		chemical reagent				0.0376	CRP
cystamine		chemical drug				0.0376	SPP1
2-acetylaminofluorene		chemical toxicant				0.0376	CCND1
myricetin		chemical - endogenous non-mammalian				0.0376	CCND1
morin		chemical - endogenous non-mammalian				0.0376	CCND1
IRF2		transcription regulator				0.0377	CCND1,CFTR
KLF11		transcription regulator				0.0383	ADAMTS1,TGFB2
IL1RN		cytokine				0.0388	LIFR,SPP1
methylprednisolone		chemical drug		-0.958		0.039	Cald1,CCND1,MYO1B,PIGR
MET		kinase				0.0394	CCND1,SPP1
TSC2		other				0.0399	CCND1,PRELP
Ren2		peptidase				0.0399	SPP1
NFkB (family)		group				0.0399	CCND1
PPP1R1B		phosphatase				0.0399	CCND1
Cyp2c23		enzyme				0.0399	TGFB2
GIP		other				0.0399	SPP1
MDK		growth factor				0.0399	Cald1
MXI1		transcription regulator				0.0399	ID2
GAL		other				0.0399	Wfdc18
GPI		enzyme				0.0399	CCND1
DNAJB6		transcription regulator				0.0399	SPP1
ABCC8		transporter				0.0399	GPX2
PIM2		kinase				0.0399	CCND1
DDX17		enzyme				0.0399	CCND1
DDX3X		enzyme				0.0399	CCND1
CCAT2		other				0.0399	CCND1
DAXX		transcription regulator				0.0399	CCND1
SMAD6		transcription regulator				0.0399	SPP1
decursin		chemical - endogenous non-mammalian				0.0399	CCND1
zearalenone		chemical toxicant				0.0399	CCND1
oxysterol		chemical - endogenous mammalian				0.0399	APOE
ethidium		chemical drug				0.0399	CCND1
ETV6-RUNX1		fusion gene/product				0.0403	ID2,MME,SPP1
prostaglandin E2		chemical - endogenous mammalian				0.0406	ADAMTS1,CCND1,SPP1
KDM5B		transcription regulator				0.0421	CCND1,TGFB2
N(6)-(3-iodobenzyl)-5'-N-methylcarboxamidoadenosine		chemical drug				0.0422	CCND1
glycine		chemical - endogenous mammalian				0.0422	CCND1
alpha-amanitin		chemical toxicant				0.0422	CCND1
Pdgf Ab		complex				0.0422	CCND1
PI-103		chemical - kinase inhibitor				0.0422	CCND1
PADI2		enzyme				0.0422	ADAMTS9
VGLL3		other				0.0422	SPP1
GLIS2		transcription regulator				0.0422	CCND1
mir-154		microRNA				0.0422	CCND1
HOXB9		transcription regulator				0.0422	TGFB2
AKR1B1		enzyme				0.0422	CCND1
ATP2A2		transporter				0.0422	CCND1
ITGAL		transmembrane receptor				0.0422	HES1
XPO1		transporter				0.0422	CCND1
indirubin		chemical drug				0.0422	CCND1
acyclic retinoid		chemical drug				0.0422	CCND1
taxifolin		chemical - endogenous non-mammalian				0.0422	APOE
acadesine		chemical drug				0.0422	OAT
ITGB1		transmembrane receptor				0.0438	APOE,SPON1
FOXM1		transcription regulator				0.0438	CCND1,CRP
Creb		group				0.0438	CCND1,HES1,TGFB2
Rp-cAMPS		chemical - kinase inhibitor				0.0445	SPP1
rituximab		biologic drug				0.0445	PEBP1
trastuzumab		biologic drug				0.0445	CCND1
TMSB4		group				0.0445	SPP1
Fgfr		group				0.0445	SPP1
Gli		group				0.0445	CCND1
SULF2		enzyme				0.0445	CCND1
NUMB		other				0.0445	HES1
CTBP2		transcription regulator				0.0445	CCND1
PTPN2		phosphatase				0.0445	CCND1
miR-503-5p (miRNAs w/seed AGCAGCG)		mature microRNA				0.0445	CCND1
GAS5		other				0.0445	CCND1
ITGB4		transmembrane receptor				0.0445	CCND1
NT5E		phosphatase				0.0445	SPP1
KCNIP3		transcription regulator				0.0445	CCND1
HNRNPU		transporter				0.0445	SPP1
ACTB		other				0.0445	Cald1
BACH1		transcription regulator				0.0445	SPP1
MST1R		kinase				0.0445	CCND1
CREB3L1		transcription regulator				0.0445	SPP1
MUC4		other				0.0445	CCND1
ACTN4		transcription regulator				0.0445	CCND1
ethosuximide		chemical drug				0.0445	CCND1
pirfenidone		chemical drug				0.0445	TGFB2
vitamin K2		chemical drug				0.0445	SPP1
lycopene		chemical drug				0.0445	CCND1
vanadate		chemical - other				0.0445	CCND1
imatinib		chemical drug				0.0448	CCND1,MME,RTN4
triptolide		chemical drug				0.0449	HILPDA,LIFR
ADRB		group				0.0455	CCND1,LBH
2-amino-5-phosphonovaleric acid		chemical - other				0.0455	ADAMTS1,LBH
ZBTB16		transcription regulator				0.0461	ID2,SPP1
BRD4		kinase				0.0461	CCND1,ID2
sulforafan		chemical drug				0.0467	CCND1,GPX2
peoniflorin		chemical drug				0.0468	ENO1
CYB5R4		enzyme				0.0468	Scd2
ZNF202		transcription regulator				0.0468	APOE
STAP2		other				0.0468	CCND1
MPZ		other				0.0468	ID2
GDF15		growth factor				0.0468	CCND1
miR-296-5p (miRNAs w/seed GGGCCCC)		mature microRNA				0.0468	CCND1
KLF10		transcription regulator				0.0468	CCND1
WWOX		enzyme				0.0468	Scd2
CCND3		kinase				0.0468	CCND1
S1PR1		G-protein coupled receptor				0.0468	CCND1
RPA1		other				0.0468	NAV2
DUSP5		phosphatase				0.0468	ID2
NAB2		transcription regulator				0.0468	ID2
HRG		other				0.0468	SPP1
PPP1R15A		other				0.0468	CCND1
CSNK2A1		kinase				0.0468	CCND1
1-methyl-4-phenylpyridinium		chemical toxicant				0.0468	CCND1
sulfasalazine		chemical drug				0.0468	CCND1
elovanoid N32		chemical - endogenous mammalian				0.0468	APOE
salvin		chemical toxicant				0.0468	CCND1
finasteride		chemical drug				0.0468	TGFB2
ACOX1		enzyme				0.0472	ADAMTS1,OAT
POU5F1		transcription regulator				0.0479	CCND1,SPP1,TGFB2
Z-LLL-CHO		chemical - protease inhibitor				0.0486	CCND1,CRP,PEBP1
FMR1		translation regulator				0.049	ENO1,SPON1
Ras homolog		group				0.0491	CCND1
Aldose Reductase		group				0.0491	CCND1
Hmgb1		transcription regulator				0.0491	CCND1
LGR5		transmembrane receptor				0.0491	OAT
AChR		complex				0.0491	ALDOC
HOXA11		transcription regulator				0.0491	SPP1
XRCC6		enzyme				0.0491	APOE
SPZ1		transcription regulator				0.0491	CCND1
EDN3		other				0.0491	CCND1
miR-23a-3p (and other miRNAs w/seed UCACAUU)		mature microRNA				0.0491	HES1
FOXF1		transcription regulator				0.0491	CCND1
GNAI3		enzyme				0.0491	SPP1
TNFRSF11A		transmembrane receptor				0.0491	MME
PER1		transcription regulator				0.0491	CCND1
AXIN1		other				0.0491	CCND1
SIN3B		transcription regulator				0.0491	HES1
SCX		transcription regulator				0.0491	SPP1
ADORA3		G-protein coupled receptor				0.0491	SPP1
PCDH11Y		other				0.0491	CCND1
PD 169316		chemical - kinase inhibitor				0.0491	CCND1
2-mercaptoacetate		chemical drug				0.0491	ENO1
PD 153035		chemical drug				0.0491	CCND1
retinol		chemical drug				0.0491	TGFB2
epirubicin		chemical drug				0.0491	CCND1
elovanoid N34		chemical - endogenous mammalian				0.0491	APOE
FOS		transcription regulator				0.0496	CCND1,ENO1,PTGDS,SPP1
HMGA1		transcription regulator				0.0496	CCND1,MIA
rifampin		chemical drug				0.0496	MME,SPP1

## Sheet: DBA+ duct cluster 1 vs all
© 2000-2020 QIAGEN. All rights reserved.
Upstream Regulator	Expr Log Ratio	Molecule Type	Predicted Activation State	Activation z-score	Flags	p-value of overlap	Target Molecules in Dataset	Mechanistic Network
TP53		transcription regulator		-0.353		3.75e-06	ALDH1A1,ANXA3,CISD1,CP,FXYD3,IGF1,IGFBP7,SEMA3C,SLC6A6,TACC2,TIMP3,TSC22D3	12 (2)
tretinoin		chemical - endogenous mammalian		1.818	bias	5e-06	ALDH1A1,ANXA5,CD14,CP,IGF1,IGFBP7,LY6E,PNRC1,PPP1R1B,SLC6A6,TSC22D3
GDF2		growth factor	Activated	2	bias	6.75e-06	ANXA3,IGF1,SEMA3C,SLC6A6
progesterone		chemical - endogenous mammalian		0.053		1.72e-05	ALDH1A1,CP,IGF1,PDZK1IP1,PPP1R1B,RAB27B,TIMP3
NR3C2		ligand-dependent nuclear receptor				3.39e-05	IGF1,SEMA3C,TACC2,TSC22D3
valproic acid		chemical drug		-1.477		3.84e-05	Bmyc,PDZK1IP1,SEMA3C,ST3GAL5,TNS1,TSC22D3
methylprednisolone		chemical drug		-0.915		7.02e-05	ALDH1A1,ANXA3,IGF1,PNRC1,SH2D4A,TIMP3
nitrofurantoin		chemical drug		-0.577		7.18e-05	ANXA5,CP,IGF1,TIMP3
beta-estradiol		chemical - endogenous mammalian		0.54	bias	7.43e-05	ANXA3,CD14,CP,FMO2,IGF1,IGFBP7,PDZK1IP1,PPP1R1B,SEMA3C,TIMP3,TSC22D3
cisplatin		chemical drug		1.323	bias	7.53e-05	ALDH1A1,ANXA5,CD14,CP,RAB27B,SLC6A6,TIMP3
gefitinib		chemical drug				9.4e-05	ALDH1A1,FMO2,IGF1,TIMP3
LEPR		transmembrane receptor				9.82e-05	ANXA5,IGF1,TIMP3,TSC22D3
TGFB1		growth factor	Activated	2.106	bias	0.000106	CD14,CSRP2,IGF1,IGFBP7,PDZK1IP1,PPP1R1B,ST3GAL5,TACC2,TIMP3,TSC22D3
vancomycin		biologic drug				0.000228	CD14,CP,FMO2
CALCA		other				0.000277	IGF1,PPP1R1B,TNS1
IL13		cytokine		0.418	bias	0.000281	CD14,CP,FXYD3,IGF1,TNS1
estrogen receptor		group		1		0.000301	IGF1,LY6E,TIMP3,TSC22D3
CDK5R1		kinase				0.000332	CD14,PPP1R1B
thioacetamide		chemical toxicant		1.982	bias	0.000361	CD14,CP,CSRP2,IGF1
dexamethasone		chemical drug	Activated	2.127		0.000458	ALDH1A1,ANXA3,CP,IGF1,LY6E,PAH,ST3GAL5,TIMP3,TNS1,TSC22D3
IFNG		cytokine		0.506	bias	0.00054	CD14,CP,IGF1,LY6E,PPP1R1B,SLC6A6,TIMP3,TSC22D3
K-252		chemical drug				0.000565	CD14,PPP1R1B
Alpha catenin		group				0.000581	ADAM33,IGF1,IGFBP7
SB-431542		chemical reagent				0.000581	CD14,IGF1,IGFBP7
IKBKB		kinase		1.067	bias	0.000596	CP,IGFBP7,SEMA3C,TIMP3	5 (3)
AR		ligand-dependent nuclear receptor		1.972	bias	0.000599	ALDH1A1,FXYD3,IGF1,TACC2,TIMP3	12 (2)
LIPE		enzyme				0.000623	ALDH1A1,CP,ST3GAL5
NCF1		enzyme				0.000657	CD14,IGF1
WNT1		cytokine				0.000748	IGF1,LY6E,SEMA3C
LLGL2		other				0.000754	SH2D4A,TNS1
prostaglandin E2		chemical - endogenous mammalian				0.000853	CD14,IGF1,IGFBP7,TSC22D3
ALDH1A2		enzyme				0.000859	ALDH1A1,TIMP3
methapyrilene		chemical drug				0.000869	ANXA5,CP,IGF1
CDK5		kinase				0.000913	CD14,PPP1R1B
Pka		complex				0.000943	CD14,IGF1,PPP1R1B
PDGF BB		complex		-0.293	bias	0.000978	CP,CSRP2,IGF1,SLC6A6
SETD2		enzyme				0.00103	IGF1,SEMA3C
HMGA1		transcription regulator				0.00106	IGF1,IGFBP7,LY6E
dihydrotestosterone		chemical - endogenous mammalian		1.961	bias	0.00109	IGF1,IGFBP7,LY6E,TACC2,TIMP3
ethionine		chemical toxicant				0.00128	CD14,CP
Gm26504		other				0.00136	IGF1
CYTL1		cytokine				0.00136	IGF1
TPH2		enzyme				0.00136	IGF1
GPX6		enzyme				0.00136	PPP1R1B
SGTA		other				0.00136	IGF1
PTS		enzyme				0.00136	IGF1
TUBB3		other				0.00136	ANXA5
NOCT		transcription regulator				0.00136	IGF1
anti-miR-29a inhibitor		chemical reagent				0.00136	TIMP3
bathophenanthroline		chemical reagent				0.00136	CP
tetrabenazine		chemical drug				0.00136	PPP1R1B
2',5'-dideoxyadenosine		chemical reagent				0.00136	IGF1
SUMO2		enzyme				0.00148	LY6E,TSC22D3
SMARCA4		transcription regulator	Activated	2	bias	0.00148	CP,FMO2,IGF1,IGFBP7,KIFC3
S100A9		other				0.00155	ALDH1A1,CP,IGF1
PTH		other				0.00158	IGF1,PPP1R1B,TNS1
raloxifene		chemical drug				0.00158	ANXA3,IGF1,TIMP3
CX3CR1		G-protein coupled receptor				0.00166	ANXA5,CD14,IGF1
ZMPSTE24		peptidase				0.00169	FMO2,IGF1
HOXA9		transcription regulator				0.00177	ALDH1A1,IGF1,TSC22D3
Hsp27		group				0.00185	CD14,PPP1R1B
S100A8		other				0.00186	ALDH1A1,CP,IGF1
E. coli serotype 0127B8 lipopolysaccharide		chemical - endogenous non-mammalian				0.00194	CD14,IGF1,PPP1R1B
2-bromoethylamine		chemical reagent				0.00201	CD14,CP
miR-1-3p (and other miRNAs w/seed GGAAUGU)		mature microRNA				0.00219	IGF1,SH2D4A,TIMP3
OGA		enzyme		1.067		0.00239	CD14,IGF1,IGFBP7,TIMP3
IL4R		transmembrane receptor				0.00243	CD14,FXYD3
FGF10		growth factor				0.00252	ANXA3,TIMP3
Ccl2		cytokine				0.00252	CD14,IGF1
PKD1		ion channel				0.00257	ALDH1A1,PAH,TNS1
deferoxamine		chemical drug				0.00261	CD14,CP,IGF1
CEBPB		transcription regulator		1.977	bias	0.00267	ALDH1A1,CD14,CP,IGF1
hexachlorobenzene		chemical toxicant				0.00271	CD14,CP
glucagon		biologic drug				0.00271	PPP1R1B,TNS1
LEPROT		other				0.00271	IGF1
LEPROTL1		other				0.00271	IGF1
MEX3C		other				0.00271	IGF1
ADGRG1		G-protein coupled receptor				0.00271	IGF1
ZNF366		transcription regulator				0.00271	TSC22D3
SPR		enzyme				0.00271	IGF1
DPP10-AS1		other				0.00271	TIMP3
IGFALS		other				0.00271	IGF1
miR-1195 (miRNAs w/seed GAGUUCG)		mature microRNA				0.00271	IGF1
PCBD1		transcription regulator				0.00271	PAH
CDO1		enzyme				0.00271	IGF1
Alocasia cucullata root extract		chemical reagent				0.00271	CD14
lanreotide		biologic drug				0.00271	IGF1
KT 5926		chemical - kinase inhibitor				0.00271	CD14
triamcinolone acetonide		chemical drug				0.00279	ST3GAL5,TACC2,TSC22D3
NFKBIA		transcription regulator		1	bias	0.00285	CP,LY6E,SEMA3C,TIMP3
GLI1		transcription regulator				0.00287	IGF1,IGFBP7,TIMP3
doxorubicin		chemical drug		0.689	bias	0.00287	CD14,CP,IGFBP7,SLC6A6	5 (2)
butyric acid		chemical - endogenous mammalian		1.029		0.00292	ALDH1A1,ANXA5,LY6E,TIMP3
CHUK		kinase				0.00294	CP,SEMA3C,TIMP3	5 (3)
3-deazaneplanocin		chemical drug				0.0034	TIMP3,TSC22D3
gentamicin C		chemical drug				0.0034	CD14,CP
lomustine		chemical drug				0.0035	CD14,CP
triamterene		chemical drug				0.00361	CD14,CP
WT1		transcription regulator				0.00388	IGF1,SLC6A6,TIMP3
fenamic acid		chemical reagent				0.00394	CD14,CP
istradefylline		chemical drug				0.00406	PPP1R1B
Gα12/13		group				0.00406	IGF1
AGPAT1		enzyme				0.00406	IGF1
RIMS2		other				0.00406	IGF1
MBD5		other				0.00406	IGF1
RACGAP1		transporter				0.00406	CD14
Lycium barbarum polysaccharides		chemical - endogenous non-mammalian				0.00406	IGF1
taprostene		chemical reagent				0.00406	TSC22D3
bacitracin		biologic drug				0.00406	ANXA5
protamine zinc insulin		biologic drug				0.00406	IGF1
HNF1A		transcription regulator				0.00415	FXYD3,IGF1,LY6E,PAH
JUN		transcription regulator				0.00421	CD14,IGFBP7,SLC6A6,TIMP3
indomethacin		chemical drug				0.00421	CD14,CP,IGF1	4 (2)
AGT		growth factor		0.655	bias	0.00424	ANXA3,CD14,CP,IGF1
RXRB		ligand-dependent nuclear receptor				0.00428	ALDH1A1,IGF1
ZFPM1		transcription regulator				0.00428	ANXA5,SH2D4A
prednisolone		chemical drug				0.00436	FMO2,IGF1,TSC22D3
MYOD1		transcription regulator				0.00456	IGF1,KIFC3,TNS1
IL1A		cytokine				0.00461	ALDH1A1,IGF1,PDZK1IP1
Il3		cytokine				0.00475	CD14,IGF1
captopril		chemical drug				0.00488	CP,CSRP2
KITLG		growth factor				0.00493	CD14,LY6E,TSC22D3
fenretinide		chemical drug				0.00513	IGF1,IGFBP7
LY294002		chemical - kinase inhibitor		-1.948	bias	0.00536	CD14,CP,IGF1,SEMA3C	5 (2)
SOD1		enzyme				0.00537	CD14,CP,IGF1
ZXDC		transcription regulator				0.00541	CD14
B3GNT2		enzyme				0.00541	CD14
SLCO1C1		transporter				0.00541	ALDH1A1
ITPRID2		other				0.00541	IGF1
ARTN		growth factor				0.00541	ALDH1A1
PKIA		other				0.00541	IGF1
FOXH1		transcription regulator				0.00541	ALDH1A1
arzoxifene		chemical drug				0.00541	IGF1
lansoprazole		chemical drug				0.00541	CD14
cyclic AMP		chemical - endogenous mammalian				0.00548	IGF1,PAH,PPP1R1B
MTPN		transcription regulator				0.00551	CP,IGF1
MYD88		other				0.00589	ALDH1A1,CD14,IGF1
fulvestrant		chemical drug				0.00607	Ifi27,IGF1,TSC22D3
IGF1R		transmembrane receptor				0.00644	ANXA3,IGF1,TIMP3
mir-29		microRNA				0.00646	IGF1,TIMP3
PRL		cytokine				0.0065	ANXA3,ANXA5,LY6E
SMPD3		enzyme				0.00676	IGF1
BUD23		enzyme				0.00676	TSC22D3
HEPH		transporter				0.00676	CP
CITED1		transcription regulator				0.00676	IGF1
Z-endoxifen		chemical - endogenous mammalian				0.00676	IGF1
tideglusib		chemical drug				0.00676	IGF1
SLC13A1		transporter				0.00689	ALDH1A1,IGF1
TCF		group				0.00689	ALDH1A1,SEMA3C
erlotinib		chemical drug				0.00704	CD14,IGFBP7
desmopressin		biologic drug				0.00718	PPP1R1B,TNS1
allopurinol		chemical drug				0.00778	CD14,CP
NFAT5		transcription regulator				0.00794	IGFBP7,SLC6A6
CYP1A1		enzyme				0.00809	ANXA3,IGF1
5R-hydroxytriptolide		chemical drug				0.0081	CD14
Msx3		transcription regulator				0.0081	IGF1
TNFRSF10A		transmembrane receptor				0.0081	CD14
miR-219a-5p (and other miRNAs w/seed GAUUGUC)		mature microRNA				0.0081	CD14
miR-320b (and other miRNAs w/seed AAAGCUG)		mature microRNA				0.0081	IGF1
ERCC1		enzyme				0.0081	IGF1
TAF10		transcription regulator				0.0081	IGF1
PSMD4		other				0.0081	CD14
EPHA4		kinase				0.0081	IGF1
ITGA11		other				0.0081	IGF1
Npy4r		G-protein coupled receptor				0.0081	IGF1
ERCC3		enzyme				0.0081	IGF1
BB-Cl-amidine		chemical reagent				0.0081	IGF1
MKNK1		kinase				0.00825	ANXA5,CP
CEBPD		transcription regulator				0.00825	CD14,IGF1
puromycin aminonucleoside		chemical reagent				0.00873	CD14,CP
CCN2		growth factor				0.00905	IGF1,TIMP3
IL1B		cytokine		1.91	bias	0.00922	CD14,CP,IGF1,TIMP3,TSC22D3
RIOX1		enzyme				0.00945	IGF1
SNED1		other				0.00945	IGF1
KMT5B		enzyme				0.00945	TSC22D3
SNTA1		other				0.00945	IGF1
GNE		kinase				0.00945	ST3GAL5
mir-320		microRNA				0.00945	IGF1
IGFBP4		other				0.00945	IGF1
PTPRS		phosphatase				0.00945	IGF1
FZD5		G-protein coupled receptor				0.00945	CD14
CHS-828		chemical drug				0.00945	ALDH1A1
FOXO4		transcription regulator				0.00972	ANXA3,IGFBP7
BDNF		growth factor				0.00981	ANXA5,CP,PPP1R1B
GNA15		enzyme				0.0102	CP,SLC6A6
ESR1		ligand-dependent nuclear receptor		1.206		0.0103	ANXA3,CP,IGF1,SEMA3C,SLC6A6,TSC22D3
ERBB3		kinase				0.0106	TIMP3,TNS1
TGFB3		growth factor				0.0106	TIMP3,TNS1
calcimycin		chemical reagent				0.0106	CD14,IGF1
SLC39A14		transporter				0.0108	IGF1
ERCC4		enzyme				0.0108	IGF1
miR-192-5p (and other miRNAs w/seed UGACCUA)		mature microRNA				0.0108	IGF1
SMN1/SMN2		other				0.0108	IGF1
GRIP1		transcription regulator				0.0108	IGF1
GRB10		other				0.0108	IGF1
LY86		other				0.0108	CD14
NEU3		enzyme				0.0108	ST3GAL5
MIA-602		chemical reagent				0.0108	IGF1
itraconazole		chemical drug				0.0108	CD14
buserelin		biologic drug				0.0108	ANXA5
FOXO3		transcription regulator				0.0108	ANXA3,IGF1,IGFBP7
cholecalciferol		chemical - endogenous mammalian				0.0111	CD14,IGF1
TNF		cytokine		-0.16	bias	0.0112	CD14,CP,IGF1,SEMA3C,ST3GAL5,TIMP3,TSC22D3
PTP4A1		phosphatase				0.0113	ANXA5,IGFBP7
SRF		transcription regulator				0.0114	CSRP2,IGF1,RAB27B
POU2F1		transcription regulator				0.0117	LY6E,TIMP3
HNF1B		transcription regulator				0.0117	PDZK1IP1,SEMA3C
staurosporine		chemical - kinase inhibitor				0.0118	ANXA5,IGF1
CLDN7		other				0.012	ANXA3,IGFBP7
L-lysine		chemical - endogenous mammalian				0.0121	IGF1
4-nonylphenol		chemical toxicant				0.0121	IGF1
SERPINB2		other				0.0121	CD14
TPM3		other				0.0121	IGF1
GHSR		G-protein coupled receptor				0.0121	IGF1
USP17L2 (includes others)		peptidase				0.0121	ALDH1A1
raltitrexed		chemical drug				0.0121	FXYD3
CITCO		chemical reagent				0.0121	ALDH1A1
E2f		group				0.0124	Bmyc,IGF1
PPARGC1A		transcription regulator				0.0126	IGFBP7,SEMA3C,TIMP3
curcumin		chemical drug				0.0126	TACC2,TIMP3,TSC22D3
HMOX1		enzyme				0.0128	CD14,IGF1
HRAS		enzyme		-1	bias	0.0128	ANXA3,CSRP2,Ifi27,TIMP3
RARA		ligand-dependent nuclear receptor				0.0129	ALDH1A1,CD14,CP
STAT1		transcription regulator				0.0132	CD14,IGF1,LY6E
AHR		ligand-dependent nuclear receptor				0.0134	CD14,FMO2,TIMP3
FTO		enzyme				0.0135	IGF1
ABCA7		transporter				0.0135	CD14
Sox2ot		other				0.0135	ALDH1A1
TAF5		transcription regulator				0.0135	IGF1
KCNN4		ion channel				0.0135	TSC22D3
HSD11B2		enzyme				0.0135	TSC22D3
AFF1		transcription regulator				0.0135	IGF1
NR3C1		ligand-dependent nuclear receptor				0.0143	IGF1,SEMA3C,TIMP3,TSC22D3
Akt		group				0.0147	CP,IGF1,PPP1R1B
ADORA2A		G-protein coupled receptor				0.0148	PPP1R1B,TSC22D3
DHTKD1		enzyme				0.0148	IGF1
DYRK1B		kinase				0.0148	CP
miR-208a-3p (and other miRNAs w/seed UAAGACG)		mature microRNA				0.0148	CD14
TWIST		group				0.0148	ST3GAL5
PIKFYVE		kinase				0.0148	ALDH1A1
2,2-bis(4-hydroxyphenyl)-1,1,1-trichloroethane		chemical - endogenous mammalian				0.0148	IGF1
tyrphostin AG 1296		chemical - kinase inhibitor				0.0148	CD14
trestolone		chemical drug				0.0148	IGF1
IKBKG		kinase				0.015	CP,SEMA3C
mibolerone		chemical drug				0.0152	IGF1,TIMP3
lipopolysaccharide		chemical drug		1.608	bias	0.0154	ANXA3,ANXA5,CD14,CP,IGF1,TIMP3,TSC22D3
ZBTB16		transcription regulator				0.016	CD14,TSC22D3
SOX2-OT		other				0.0161	ALDH1A1
STAT1/3/5 dimer		complex				0.0161	TIMP3
NPY2R		G-protein coupled receptor				0.0161	IGF1
RASGRF1		other				0.0161	IGF1
CDON		other				0.0161	TIMP3
ACO1		enzyme				0.0161	IGF1
LY-2510924		biologic drug				0.0161	CD14
trientine		chemical drug				0.0161	IGF1
ACOX1		enzyme				0.0164	IGF1,PAH
hydrocortisone		chemical - endogenous mammalian				0.0167	IGF1,IGFBP7
ciprofibrate		chemical drug				0.0167	IGF1,PAH
ethanol		chemical - endogenous mammalian				0.0168	CD14,PPP1R1B,TSC22D3
rifampin		chemical drug				0.0173	ALDH1A1,CD14
GSX2		transcription regulator				0.0175	PPP1R1B
EN1		transcription regulator				0.0175	ALDH1A1
VEGFD		growth factor				0.0175	ADAM33
RBP1		transporter				0.0175	ALDH1A1
hormone		chemical drug				0.0175	IGF1
KMT2A-AFF1		fusion gene/product				0.0175	IGFBP7
PRKAA1		kinase				0.0175	IGF1,TNS1
H89		chemical - kinase inhibitor				0.018	CD14,IGF1
SIRT1		transcription regulator				0.0185	IGF1,LY6E,TIMP3
estrone		chemical - endogenous mammalian				0.0188	IGF1
DANCR		other				0.0188	TIMP3
CSF3R		transmembrane receptor				0.0188	CD14
SOCS2		other				0.0188	IGF1
cetrorelix		biologic drug				0.0188	ANXA5
Nr1h		group				0.0191	ALDH1A1,TIMP3
alitretinoin		chemical drug				0.0191	ANXA5,CD14
10E,12Z-octadecadienoic acid		chemical - endogenous mammalian				0.0198	FMO2,IGF1
HOXC9		transcription regulator				0.0201	TIMP3
TNFSF9		cytokine				0.0201	CD14
TGFBR3		kinase				0.0201	ALDH1A1
hydroxyflutamide		chemical drug				0.0201	IGF1
zinc protoporphyrin IX		chemical - endogenous mammalian				0.0201	IGF1
NR1I2		ligand-dependent nuclear receptor				0.0207	ALDH1A1,IGF1
Hdac		group				0.0214	IGF1,SEMA3C
TWIST1		transcription regulator				0.0214	ALDH1A1,TIMP3
prostaglandin A2		chemical - endogenous non-mammalian				0.0215	IGF1
Stat5 dimer		complex				0.0215	IGF1
GC-GCR dimer		complex				0.0215	TSC22D3
MIR101		group				0.0215	IGF1
IGFBP1		other				0.0215	IGF1
S1PR3		G-protein coupled receptor				0.0215	IGF1
androgen		chemical drug				0.0219	IGF1,TACC2
5-azacytidine		chemical drug				0.0224	PAH,PNRC1
cryptotanshinone		chemical drug				0.0228	CD14
LBP		transporter				0.0228	CD14
IL1RAP		transmembrane receptor				0.0228	CD14
ARG1		enzyme				0.0228	IGF1
PCSK1		peptidase				0.0228	IGF1
glutamyl-Se-methylselenocysteine		chemical - endogenous mammalian				0.0228	TIMP3
CEBPA		transcription regulator				0.0228	CD14,IGF1,TSC22D3
fluticasone propionate		chemical drug				0.0229	TIMP3,TSC22D3
HNF4A		transcription regulator		-1.067		0.023	ALDH1A1,ANXA5,CP,FMO2,IGF1,SEMA3C,TIMP3
cardiotoxin		chemical - other				0.0231	IGF1,IGFBP7
CSF3		cytokine				0.0236	CD14,IGF1
FOXO1		transcription regulator				0.024	ANXA3,IGF1,IGFBP7
TAF1		transcription regulator				0.0241	IGF1
SLC6A3		transporter				0.0241	PPP1R1B
PLA2G4A		enzyme				0.0241	ANXA5
BARX2		transcription regulator				0.0241	TIMP3
TGAL copolymer		biologic drug				0.0241	IGF1
E2F3		transcription regulator				0.0241	IGF1,TIMP3
MYB		transcription regulator				0.0244	CD14,IGF1
POR		enzyme				0.0249	ALDH1A1,ANXA5
LEP		growth factor				0.025	CD14,IGF1,TIMP3
SHH		peptidase				0.0254	IGF1,TSC22D3
prostaglandin E1		chemical - endogenous mammalian				0.0254	CD14
SCP2		transporter				0.0254	PDZK1IP1
vitamin K2		chemical drug				0.0254	CD14
NKX2-1		transcription regulator				0.0257	CD14,FXYD3
ESRRA		ligand-dependent nuclear receptor				0.0259	CSRP2,PPP1R1B
SOX2		transcription regulator				0.0262	ALDH1A1,IGF1,TIMP3
Histone h3		group				0.0264	IGF1,RAB27B,TACC2
cyclooxygenase		group				0.0268	IGF1
peoniflorin		chemical drug				0.0268	PPP1R1B
GDF15		growth factor				0.0268	TIMP3
mir-192		microRNA				0.0268	IGF1
LY6E	0.977	other				0.0268	CD14
S1PR1		G-protein coupled receptor				0.0268	IGF1
HRG		other				0.0268	TIMP3
salvin		chemical toxicant				0.0268	CD14
PDX1		transcription regulator				0.027	PDZK1IP1,SLC6A6
NOS2		enzyme				0.0272	CD14,CP
CpG ODN 2395		chemical reagent				0.0281	CD14
vismodegib		chemical drug				0.0281	CD14
CYP2E1		enzyme				0.0281	CD14
SP100		transcription regulator				0.0281	CD14
YWHAZ		enzyme				0.0281	TSC22D3
FBN1		other				0.0281	TIMP3
ITGA2		transmembrane receptor				0.0281	IGF1
SCX		transcription regulator				0.0281	TIMP3
PD 169316		chemical - kinase inhibitor				0.0281	TIMP3
2-mercaptoacetate		chemical drug				0.0281	IGF1
W7		chemical reagent				0.0281	CD14
bexarotene		chemical drug				0.0283	PNRC1,TSC22D3
bleomycin		chemical drug				0.0288	IGF1,TIMP3
PPARG		ligand-dependent nuclear receptor				0.029	IGF1,IGFBP7,TSC22D3
prostaglandin A1		chemical - endogenous non-mammalian				0.0294	CD14
IgG1		complex				0.0294	CD14
SFTPD		other				0.0294	CD14
TERF2IP		other				0.0294	Ifi27
cuprizone		chemical toxicant				0.0294	IGF1
selenomethylselenocysteine		chemical - endogenous mammalian				0.0294	TIMP3
HGF		growth factor				0.0296	IGF1,PNRC1,TIMP3
thapsigargin		chemical toxicant				0.0297	CP,IGF1
EDN1		cytokine				0.0299	ANXA5,TIMP3
CXCL12		cytokine				0.0302	CD14,IGFBP7
IRF3		transcription regulator				0.0305	PAH,TIMP3
Pde4		group				0.0307	CD14
MGP		other				0.0307	PAH
IGFBP5		other				0.0307	IGF1
NFE2		transcription regulator				0.0307	RAB27B
lipoarabinomannan		chemical - endogenous non-mammalian				0.0307	CD14
wortmannin		chemical - kinase inhibitor				0.031	CD14,IGF1
ELAVL1		other				0.0313	Ifi27,TSC22D3
trichostatin A		chemical drug		1.941	bias	0.0315	CD14,PAH,SEMA3C,TIMP3
2-aminopurine		chemical reagent				0.032	IGF1
PDGF-AA		complex				0.032	IGF1
GRHL2		transcription regulator				0.032	SEMA3C
HOXA13		transcription regulator				0.032	ALDH1A1
miR-181a-5p (and other miRNAs w/seed ACAUUCA)		mature microRNA				0.032	TIMP3
TNFRSF11B		transmembrane receptor				0.032	IGF1
TGFB1I1		transcription regulator				0.032	TNS1
HOXA5		transcription regulator				0.032	IGF1
GHRH		other				0.0334	IGF1
Saa3		other				0.0334	IGF1
hemocyanin		biologic drug				0.0334	CD14
simvastatin		chemical drug				0.0339	ANXA3,CD14
Jnk		group				0.0345	ANXA5,IGF1
CDC73		other				0.0347	IGF1
SPRY1		other				0.0347	IGF1
amino acids		chemical - endogenous mammalian				0.0347	IGF1
immethridine		chemical reagent				0.0347	CD14
isobutylmethylxanthine		chemical toxicant				0.0348	CD14,TIMP3
HSF1		transcription regulator				0.0353	CSRP2,SEMA3C
carbon tetrachloride		chemical toxicant				0.0353	IGF1,TIMP3
U0126		chemical - kinase inhibitor				0.0355	KIFC3,TIMP3,TSC22D3
UTP		chemical - endogenous mammalian				0.036	CD14
RNY3		other				0.036	LY6E
BMPR2		kinase				0.036	SEMA3C
DTX1		transcription regulator				0.036	LY6E
ESRRB		ligand-dependent nuclear receptor				0.036	SLC6A6
calcifediol		chemical - endogenous mammalian				0.036	CD14
rifaximin		chemical drug				0.036	ANXA5
octreotide		biologic drug				0.036	IGF1
PAX3-FOXO1		fusion gene/product				0.0371	ANXA5,ST3GAL5
LATS1		kinase				0.0373	CD14
CDH11		other				0.0373	IGF1
SFN		other				0.0373	PPP1R1B
titanium dioxide		chemical drug				0.0373	IGF1
CTNNB1		transcription regulator				0.0376	ALDH1A1,LY6E,SEMA3C,TIMP3
TGM2		enzyme				0.0383	LY6E,PNRC1
L-arginine		chemical - endogenous mammalian				0.0386	IGF1
succinic acid		chemical - endogenous mammalian				0.0386	ANXA3
APP		other				0.0388	ANXA5,CP,IGF1,ST3GAL5
SIAH2		transcription regulator				0.0399	FXYD3
mir-23		microRNA				0.0399	IGF1
OSM		cytokine				0.0401	ANXA3,PDZK1IP1,TIMP3
cholesterol		chemical - endogenous mammalian				0.0405	CD14,TIMP3
TO-901317		chemical reagent				0.0411	IGF1,TIMP3
caspase		group				0.0412	CD14
daporinad		chemical drug				0.0412	ALDH1A1
PTX3		other				0.0412	IGF1
IFRD1		other				0.0412	IGF1
KNG1		other				0.0412	IGF1
ACKR3		G-protein coupled receptor				0.0412	IGFBP7
DRD2		G-protein coupled receptor				0.0412	IGF1
PD98059		chemical - kinase inhibitor				0.0412	CD14,IGF1,TSC22D3
ELF3		transcription regulator				0.0425	TIMP3
ROR1		kinase				0.0425	TNS1
IFT88		other				0.0425	TIMP3
mir-221		microRNA				0.0425	TIMP3
NOSTRIN		transcription regulator				0.0425	ANXA5
gentamicin		chemical drug				0.0436	ALDH1A1,CSRP2
Fgf		group				0.0438	IGF1
miR-221-3p (and other miRNAs w/seed GCUACAU)		mature microRNA				0.0438	TIMP3
MARK2		kinase				0.0438	IGF1
RXRG		ligand-dependent nuclear receptor				0.0438	TIMP3
LRP5		transmembrane receptor				0.0438	ALDH1A1
taurine		chemical - endogenous mammalian				0.0438	SLC6A6
arginine		chemical - endogenous mammalian				0.0451	IGF1
CHRNA7		transmembrane receptor				0.0451	TIMP3
DNASE2		enzyme				0.0451	CP
SELP		transmembrane receptor				0.0451	IGF1
TIMP1		cytokine				0.0451	TIMP3
LOC105372576		other				0.0451	TIMP3
green tea polyphenol		chemical drug				0.0451	IGF1
KDM6A		enzyme				0.0464	PAH
DIO3		enzyme				0.0464	ALDH1A1
CYP27B1		enzyme				0.0464	CD14
IL17F		cytokine				0.0464	IGF1
lactic acid		chemical - endogenous mammalian				0.0464	IGF1
methylnitrosourea		chemical toxicant				0.0464	TIMP3
FUS-DDIT3		fusion gene/product				0.0464	TSC22D3
asoprisnil		chemical drug				0.0477	IGF1
NCSTN		peptidase				0.0477	CD14
IGFBP3		other				0.0477	IGF1
GTF2B		transcription regulator				0.0477	IGF1
HSPG2		enzyme				0.0477	IGF1
GNB2		enzyme				0.049	TSC22D3
CD80		transmembrane receptor				0.049	TSC22D3

## Sheet: DBA+ duct cluster 2 vs all
© 2000-2020 QIAGEN. All rights reserved.
Upstream Regulator	Expr Log Ratio	Molecule Type	Predicted Activation State	Activation z-score	Flags	p-value of overlap	Target Molecules in Dataset	Mechanistic Network
ESR2		ligand-dependent nuclear receptor		0.555		1.34e-07	ADAMTS1,APOE,CBS/CBSL,CCND1,SPP1,Wfdc3	6 (2)
methapyrilene		chemical drug				7.02e-07	APOE,CBS/CBSL,CCND1,Sult1a1
FGFR3		kinase				9.3e-07	CCND1,HES1,SPP1
nitrofurantoin		chemical drug		1.067		1.43e-06	ADAMTS1,APOE,CCND1,SPP1
thyroid hormone		chemical - endogenous mammalian				2.2e-06	Apoc1,APOE,CCND1,OAT
Hedgehog		group				2.34e-06	CCND1,HES1,SPP1
ZIC1		transcription regulator				2.68e-06	APOE,CCND1
JAG1		growth factor				2.95e-06	CCND1,HES1,SPP1	3 (2)
trichostatin A		chemical drug		0.902	bias	3.2e-06	ADAMTS1,APOE,CCND1,HES1,OAT,SPP1	6 (3)
simvastatin		chemical drug				3.92e-06	ADAMTS1,APOE,CCND1,SPP1
phenylbutazone		chemical drug				4.07e-06	ADAMTS1,CCND1,SPP1
HES1	0.726	transcription regulator				4.27e-06	HES1,OAT,SPP1
LY294002		chemical - kinase inhibitor	Inhibited	-2.166	bias	5.17e-06	ADAMTS1,APOE,CCND1,HES1,SPP1
triamcinolone		chemical drug				5.62e-06	APOE,CBS/CBSL
DKK2		other				7.49e-06	CCND1,SPP1
SP1		transcription regulator				7.63e-06	ADAMTS1,APOE,CBS/CBSL,CCND1,SPP1
E. coli B5 lipopolysaccharide		chemical - endogenous non-mammalian		0.064	bias	8.6e-06	ADAMTS1,Apoc1,CCND1,SPP1
SOD1		enzyme				9e-06	ALDOC,APOE,CCND1,SPP1
NOTCH1		transcription regulator		0.776		9.41e-06	CCND1,HES1,OAT,SPP1
ZIC2		transcription regulator				9.63e-06	APOE,CCND1
USF1		transcription regulator				1.01e-05	CBS/CBSL,PIGR,SPP1
progesterone		chemical - endogenous mammalian		0.497		1.24e-05	ADAMTS1,APOE,CCND1,PIGR,SPP1
estrogen		chemical drug				1.29e-05	APOE,CCND1,OAT,SPP1
RASSF1		other				1.38e-05	APOE,CCND1,SPP1	3 (4)
enterolactone		chemical - endogenous mammalian				1.47e-05	CCND1,SPP1
pterostilbene		chemical drug				1.47e-05	CCND1,HES1
NR3C1		ligand-dependent nuclear receptor				2.06e-05	APOE,CCND1,OAT,PIGR,SPP1
EN1		transcription regulator				2.08e-05	ALDOC,CCND1
CCN2		growth factor				2.26e-05	ADAMTS1,CCND1,HES1
Mapk		group				2.39e-05	CCND1,PIGR,SPP1	3 (2)
HTT		transcription regulator				2.52e-05	ALDOC,APOE,CCND1,OAT,SPP1
APBB1		transcription regulator				2.8e-05	CCND1,HES1
STK3		kinase				3.2e-05	CCND1,SPP1
MAML1		transcription regulator				3.2e-05	CCND1,HES1
mevastatin		chemical drug				3.2e-05	ADAMTS1,APOE
FGF1		growth factor				3.79e-05	APOE,CCND1,SPP1	3 (4)
WNT1		cytokine				4.35e-05	CCND1,HES1,SPP1	3 (2)
FGFR2		kinase				4.35e-05	CCND1,HES1,SPP1
beta-estradiol		chemical - endogenous mammalian		1.049	bias	4.36e-05	ADAMTS1,APOE,CCND1,HES1,OAT,PIGR,Wfdc3
APC		enzyme				4.76e-05	CCND1,HES1,SPP1
NR3C2		ligand-dependent nuclear receptor				4.86e-05	ADAMTS1,Apoc1,APOE
SAV1		other				5.07e-05	CCND1,SPP1
DHX9		enzyme				5.07e-05	APOE,CCND1
RND3		enzyme				5.07e-05	CCND1,HES1
lovastatin		chemical drug				6e-05	ADAMTS1,APOE,CCND1
HIF1A		transcription regulator				6.14e-05	ADAMTS1,ALDOC,APOE,CCND1
Histone h4		group				6.25e-05	CCND1,HES1,SPP1	3 (2)
HTATIP2		transcription regulator				6.74e-05	CCND1,SPP1
RBPJ		transcription regulator				6.76e-05	CCND1,HES1,OAT
metribolone		chemical reagent				6.83e-05	ADAMTS1,ALDOC,CCND1,PIGR
LCAT		enzyme				7.35e-05	APOE,CCND1
kainic acid		chemical toxicant				7.44e-05	APOE,CCND1,SPP1	3 (5)
NR2C2		ligand-dependent nuclear receptor				7.99e-05	APOE,CCND1
RELA		transcription regulator				8.46e-05	APOE,CBS/CBSL,CCND1,HES1
cardiotoxin		chemical - other				8.61e-05	CCND1,PIGR,SPP1
TWIST1		transcription regulator				8.61e-05	ADAMTS1,SPP1,Wfdc3
MST1		growth factor				8.65e-05	CCND1,SPP1
Hdac		group				8.77e-05	ADAMTS1,CCND1,SPP1
trabectedin		chemical drug				9.34e-05	CCND1,OAT
tretinoin		chemical - endogenous mammalian		0.578	bias	9.35e-05	APOE,CBS/CBSL,CCND1,HES1,OAT,SPP1	6 (2)
PTH		other				9.4e-05	ADAMTS1,CCND1,SPP1
raloxifene		chemical drug				9.4e-05	CCND1,HES1,SPP1	3 (4)
IL1B		cytokine		-0.274	bias	9.63e-05	ADAMTS1,APOE,HES1,PIGR,SPP1
PRKDC		kinase				0.000101	APOE,CCND1
JUN		transcription regulator				0.000103	APOE,CCND1,HES1,SPP1
PPARG		ligand-dependent nuclear receptor		1.005	bias	0.000105	APOE,CCND1,HES1,SPP1	4 (2)
NR1H4		ligand-dependent nuclear receptor				0.000106	APOE,SPP1,Sult1a1
gefitinib		chemical drug				0.000106	ADAMTS1,CCND1,Sult1a1
NF1		other				0.000108	CBS/CBSL,CCND1
HGF		growth factor		1.938	bias	0.000109	ADAMTS1,CCND1,HES1,SPP1
SHH		peptidase				0.000109	ADAMTS1,CCND1,SPP1
IL4		cytokine				0.000113	ALDOC,APOE,CCND1,PIGR,SPP1
PTH1R		G-protein coupled receptor				0.000124	CCND1,SPP1
crocidolite asbestos		chemical toxicant				0.000124	CCND1,SPP1
Fc gamma receptor		group				0.000132	CCND1,HES1
IHH		enzyme				0.000132	CCND1,SPP1
GJA1		transporter				0.00014	CCND1,SPP1
PAK1		kinase				0.000149	CCND1,HES1
indole-3-carbinol		chemical drug				0.000158	CCND1,SPP1
OSM		cytokine				0.000174	ADAMTS1,CCND1,PIGR,SPP1
MSX2		transcription regulator				0.000177	CCND1,SPP1
FN1		enzyme				0.000178	APOE,CCND1,SPP1	3 (4)
LDLR		transporter				0.000188	APOE,CCND1,SPP1
LIF		cytokine				0.000193	CCND1,HES1,SPP1
JAG2		growth factor				0.000197	HES1,SPP1
carbon tetrachloride		chemical toxicant				0.000201	APOE,SPP1,Sult1a1
carbamylcholine		chemical drug				0.000207	APOE,CCND1
dihydrotestosterone		chemical - endogenous mammalian				0.000211	ADAMTS1,APOE,CCND1,SPP1
POSTN		other				0.000217	HES1,SPP1
cyclopamine		chemical reagent				0.000228	CCND1,SPP1
Growth hormone		group				0.000235	APOE,CCND1,SPP1	3 (4)
TO-901317		chemical reagent				0.00025	Apoc1,APOE,CCND1
ANGPT1		growth factor				0.00025	ADAMTS1,CCND1
tetradecanoylphorbol acetate		chemical drug		1.536	bias	0.000261	ADAMTS1,CBS/CBSL,CCND1,HES1,SPP1
indomethacin		chemical drug				0.000262	ADAMTS1,CCND1,SPP1
prednisolone		chemical drug				0.000272	APOE,HES1,SPP1
gentamicin		chemical drug				0.000272	CBS/CBSL,SPP1,Sult1a1
IL33		cytokine				0.000275	ADAMTS1,APOE,CCND1
MYC		transcription regulator				0.000284	ADAMTS1,CCND1,HES1,OAT,SPP1
baicalein		chemical drug				0.000286	APOE,CCND1
monocrotaline		chemical toxicant				0.000298	CCND1,SPP1
CSF1		cytokine				0.000306	APOE,CCND1,SPP1	3 (5)
SCARB1		transporter				0.000311	APOE,SPP1
ITGA5		transmembrane receptor				0.000311	APOE,CCND1
2-bromoethylamine		chemical reagent				0.000311	ADAMTS1,SPP1
MAPK7		kinase				0.000311	ADAMTS1,CCND1
D-glucose		chemical - endogenous mammalian		1.934	bias	0.000325	ALDOC,CCND1,OAT,SPP1
DGCR8		enzyme				0.000337	CCND1,HES1
KRAS		enzyme				0.000338	ALDOC,CCND1,HES1,SPP1
LDL		complex				0.00035	APOE,CBS/CBSL,CCND1
SPI1		transcription regulator				0.00035	CCND1,HES1,SPP1	3 (3)
HDAC1		transcription regulator				0.00035	CCND1,HES1,SPP1
FHL2		transcription regulator				0.00035	CCND1,SPP1
KLF4		transcription regulator				0.000358	ADAMTS1,CCND1,HES1
Rock		group				0.000364	CCND1,SPP1
GHR		transmembrane receptor				0.000364	CCND1,SPP1
enalapril		biologic drug				0.000406	ADAMTS1,SPP1
dextran sulfate		chemical drug				0.000419	ADAMTS1,CCND1,PIGR
PGR		ligand-dependent nuclear receptor				0.000419	ADAMTS1,CCND1,HES1
PTK2		kinase				0.000436	CCND1,SPP1
Akt		group				0.00045	CCND1,HES1,SPP1
forskolin		chemical toxicant		-0.594	bias	0.000454	ADAMTS1,ALDOC,CCND1,SPP1
HIC1		transcription regulator				0.000482	CCND1,SPP1
vitamin D		chemical drug				0.000482	ADAMTS1,SPP1
SP600125		chemical - kinase inhibitor				0.000487	APOE,CCND1,SPP1	3 (4)
tazemetostat		chemical drug				0.000492	ADAMTS1,CCND1,SPP1
RXRA		ligand-dependent nuclear receptor				0.000497	APOE,CCND1,SPP1
sodium arsenite		chemical drug				0.000498	CBS/CBSL,CCND1
VEGFA		growth factor				0.000506	ADAMTS1,CCND1,HES1
USF2		transcription regulator				0.000514	PIGR,SPP1
gentamicin C		chemical drug				0.000531	ADAMTS1,SPP1
dexamethasone		chemical drug		0.176		0.000539	ADAMTS1,APOE,CCND1,HES1,SPP1,Sult1a1
NCK		group				0.000541	CCND1
FBXO31		enzyme				0.000541	CCND1
DNAJA4		other				0.000541	APOE
KCNJ12		ion channel				0.000541	CCND1
CALCOCO1		transcription regulator				0.000541	CCND1
URGCP		other				0.000541	CCND1
CCDC62		transcription regulator				0.000541	CCND1
PLAC1		other				0.000541	CCND1
FERD3L		transcription regulator				0.000541	HES1
Integrin alpha 5 beta 1		complex				0.000541	CCND1
Mapk kinase		group				0.000541	CCND1
FANCG		other				0.000541	HES1
FANCL		enzyme				0.000541	HES1
Tenascin		group				0.000541	CCND1
ADCY2		enzyme				0.000541	CCND1
TOB2		other				0.000541	CCND1
GTPBP4		enzyme				0.000541	CCND1
NOTCH2NLA/NOTCH2NLB		other				0.000541	HES1
PTPRU		phosphatase				0.000541	CCND1
PMS2		enzyme				0.000541	CCND1
FANCE		other				0.000541	HES1
CDK20		kinase				0.000541	CCND1
ralimetinib		chemical drug				0.000541	SPP1
PTOV1		other				0.000541	CCND1
ALYREF		transcription regulator				0.000541	APOE
IFITM3		other				0.000541	SPP1
RPLP0		other				0.000541	CCND1
amlexanox		chemical drug				0.000541	CCND1
sulfaphenazole		chemical drug				0.000541	CCND1
Ro 20-1724		chemical reagent				0.000541	CCND1
anti-miR-302d		chemical reagent				0.000541	CCND1
anti-miR-302c inhibitor		chemical reagent				0.000541	CCND1
beta-penta-O-galloyl-glucose		chemical - endogenous non-mammalian				0.000541	CCND1
hydrocortisone phosphate		chemical drug				0.000541	APOE
SP2509		chemical reagent				0.000546	ADAMTS1,CCND1,SPP1
BSCL2		other				0.000547	CCND1,Sult1a1
MBD2		transcription regulator				0.000564	APOE,OAT
triamterene		chemical drug				0.000564	ADAMTS1,SPP1
prostaglandin E2		chemical - endogenous mammalian				0.000567	ADAMTS1,CCND1,SPP1
Collagen type I (complex)		complex				0.000599	APOE,CCND1
tamoxifen		chemical drug				0.000599	CCND1,HES1,SPP1
FANCC		other				0.000617	HES1,OAT
fenamic acid		chemical reagent				0.000617	ADAMTS1,SPP1
IL6		cytokine				0.000625	ADAMTS1,APOE,CCND1,SPP1
mifepristone		chemical drug				0.000627	APOE,CCND1,SPP1	3 (4)
2-deoxyglucose		chemical drug				0.000635	CCND1,SPP1
APOE	0.999	transporter				0.000644	APOE,CCND1,SPP1	3 (5)
cisplatin		chemical drug		-0.13	bias	0.000646	ADAMTS1,CCND1,OAT,SPP1
gemfibrozil		chemical drug				0.000653	APOE,CCND1
ADAM17		peptidase				0.000671	CCND1,HES1
PTHLH		other				0.000671	ADAMTS1,CCND1
decitabine		chemical drug		-0.46	bias	0.000684	ADAMTS1,APOE,CCND1,SPP1
heparin		chemical - endogenous mammalian				0.00069	APOE,CCND1
NTRK2		kinase				0.000728	CCND1,SPP1
dinoprost		chemical - endogenous mammalian				0.000767	CCND1,SPP1
RBL1		transcription regulator				0.000767	CCND1,HES1
IL1		group				0.000777	ADAMTS1,APOE,PIGR
PRNP		other				0.000787	APOE,CCND1
bucladesine		chemical toxicant				0.000803	ADAMTS1,APOE,CCND1
Gsk3		group				0.000828	CCND1,SPP1
PIN1		enzyme				0.000828	CCND1,HES1
ciglitazone		chemical drug				0.000828	APOE,CCND1
JUND		transcription regulator				0.000848	CCND1,SPP1
GAST		other				0.000848	CCND1,HES1
ERBB2		kinase				0.000865	ALDOC,CCND1,HES1,Sult1a1
MBD3		other				0.000869	APOE,CCND1
MTPN		transcription regulator				0.000869	CCND1,SPP1
AHR		ligand-dependent nuclear receptor				0.00087	CCND1,HES1,SPP1	3 (3)
STAT1		transcription regulator				0.000891	APOE,CCND1,HES1
phenobarbital		chemical drug				0.000912	CCND1,Sult1a1
TCR		complex				0.000934	APOE,CCND1,SPP1	3 (5)
cycloheximide		chemical reagent				0.000963	CCND1,PIGR,SPP1	3 (3)
MAPK3		kinase				0.000978	CCND1,SPP1
MYOC		other				0.001	ADAMTS1,SPP1
IKBKE		kinase				0.001	ALDOC,CCND1
FGF19		growth factor				0.001	APOE,CCND1
vancomycin		biologic drug				0.001	ADAMTS1,SPP1
NCOA3		transcription regulator				0.00102	CCND1,HES1
MAPK1		kinase				0.00103	APOE,CCND1,SPP1	3 (4)
hemin		chemical - endogenous mammalian				0.00105	CCND1,SPP1
POU2F2		transcription regulator				0.00107	ALDOC,SPP1
4-aminopyrazolo(3,4-d)pyrimidine		chemical reagent				0.00108	APOE
isopropyl thiogalactoside		chemical reagent				0.00108	CCND1
gentamicin C1		chemical drug				0.00108	SPP1
CERT1		kinase				0.00108	CCND1
lonaprisan		chemical drug				0.00108	CCND1
nitrosomethylurethane		chemical reagent				0.00108	CCND1
RBM15		other				0.00108	HES1
REM2		enzyme				0.00108	CCND1
RPRD1B		other				0.00108	CCND1
CCDC88C		other				0.00108	CCND1
OSI-027		chemical drug				0.00108	CCND1
VENTX		transcription regulator				0.00108	CCND1
ETS-ELK1		complex				0.00108	CCND1
CTNNβ-LEF1		complex				0.00108	CCND1
EIF4H		translation regulator				0.00108	CCND1
RNMT		enzyme				0.00108	CCND1
MCF2L		other				0.00108	CCND1
FANCF		other				0.00108	HES1
Til1		other				0.00108	SPP1
RRAD		enzyme				0.00108	CCND1
AFM		transporter				0.00108	APOE
PTPRF		phosphatase				0.00108	CCND1
DAPK3		kinase				0.00108	CCND1
RAC3		enzyme				0.00108	CCND1
lynestrenol		chemical drug				0.00108	APOE
CCNDBP1		other				0.00108	CCND1
NASP		other				0.00108	CCND1
MAML3		transcription regulator				0.00108	HES1
FBXO4		enzyme				0.00108	CCND1
HES7		transcription regulator				0.00108	HES1
ILKAP		phosphatase				0.00108	CCND1
ING2		transcription regulator				0.00108	SPP1
DPH1		other				0.00108	CCND1
TFA-12		chemical reagent				0.00108	HES1
parsatuzumab		biologic drug				0.00108	HES1
APOC1		transporter				0.00108	APOE
MAML2		transcription regulator				0.00108	HES1
sorafenib derivative SC-1		chemical reagent				0.00108	CCND1
phosphorylethanolamine		chemical - endogenous mammalian				0.00108	CCND1
inostamycin		chemical reagent				0.00108	CCND1
neratinib		chemical drug				0.00108	CCND1
(S)-flurbiprofen		chemical drug				0.00108	CCND1
22-hydroxycholesterol		chemical - endogenous mammalian				0.00108	APOE
FGF8		growth factor				0.00109	CCND1,SPP1
PSEN1		peptidase				0.0011	APOE,CCND1,HES1
miR-125b-5p (and other miRNAs w/seed CCCUGAG)		mature microRNA				0.00114	ADAMTS1,PIGR
TCF4		transcription regulator				0.00115	CCND1,HES1,SPP1
TAF4		transcription regulator				0.00116	CCND1,SPP1
okadaic acid		chemical toxicant				0.00116	CCND1,SPP1
FGFR1		kinase				0.00119	CCND1,HES1
daidzein		chemical drug				0.00119	APOE,CCND1
allopurinol		chemical drug				0.00121	ADAMTS1,SPP1
HDAC3		transcription regulator				0.00121	CCND1,SPP1
CTNNB1		transcription regulator		1.582	bias	0.00122	CCND1,HES1,OAT,SPP1
APP		other				0.00124	ALDOC,APOE,CCND1,HES1
ETV5		transcription regulator				0.00126	CCND1,SPP1
OGA		enzyme				0.00131	ALDOC,APOE,CCND1
torin1		chemical reagent				0.00131	ALDOC,CCND1
NS-398		chemical reagent				0.00131	CCND1,SPP1
FGF2		growth factor				0.00133	CCND1,HES1,SPP1	3 (3)
N-cor		group				0.00134	CCND1,HES1
INSIG1		other				0.00137	Apoc1,APOE
TAZ		enzyme				0.00137	ADAMTS1,ALDOC
CGA		other				0.00139	ADAMTS1,CCND1
puromycin aminonucleoside		chemical reagent				0.00139	ADAMTS1,SPP1
NFATC1		transcription regulator				0.00145	CCND1,SPP1
GLI2		transcription regulator				0.00147	CCND1,SPP1
Esrra		transcription regulator				0.00147	ALDOC,SPP1
doxorubicin		chemical drug				0.00149	ADAMTS1,CCND1,SPP1
butyric acid		chemical - endogenous mammalian				0.00154	CBS/CBSL,CCND1,SPP1
pirinixic acid		chemical toxicant				0.00155	ALDOC,APOE,CCND1
RRP1B		transcription regulator				0.00156	CCND1,SPP1
diethylnitrosamine		chemical toxicant				0.00158	CCND1,OAT
cyclosporin A		biologic drug				0.00159	APOE,CCND1,SPP1	3 (5)
hyodeoxycholic acid		chemical - endogenous mammalian				0.00162	APOE
1-palmitoyl-2-arachidonoyl-phosphatidylcholine		chemical - endogenous mammalian				0.00162	CCND1
myosin-light-chain kinase		group				0.00162	CCND1
FKHR		group				0.00162	CCND1
NSD3		enzyme				0.00162	CCND1
Jun-ATF2		complex				0.00162	CCND1
PRAG1		kinase				0.00162	HES1
NIBAN2		transcription regulator				0.00162	CCND1
NOP58		enzyme				0.00162	CCND1
GPC6		transmembrane receptor				0.00162	CCND1
NDUFAF3		other				0.00162	CCND1
PSMD14		peptidase				0.00162	CCND1
KLHL2		other				0.00162	CCND1
OLA1		enzyme				0.00162	CCND1
methylamphotericin B		chemical drug				0.00162	SPP1
UBE2D3		enzyme				0.00162	CCND1
SRGAP1		other				0.00162	CCND1
SERTAD1		transcription regulator				0.00162	CCND1
GPC3		other				0.00162	CCND1
MAT2B		enzyme				0.00162	CCND1
AGAP2		enzyme				0.00162	CCND1
U2AF2		other				0.00162	CCND1
PHIP		other				0.00162	CCND1
riociguat		chemical drug				0.00162	SPP1
mir-497		microRNA				0.00162	CCND1
SGI 1776		chemical drug				0.00162	CCND1
RALGDS		other				0.00162	CCND1
MGAT4A		enzyme				0.00162	CCND1
EIF2B1		translation regulator				0.00162	CCND1
AHNAK		other				0.00162	CCND1
PTTG1IP		other				0.00162	CCND1
BCLAF1		transcription regulator				0.00162	CCND1
SRPK2		kinase				0.00162	CCND1
CTAG1A/CTAG1B		other				0.00162	CCND1
SPEN		transcription regulator				0.00162	HES1
ARHGEF2		other				0.00162	CCND1
ALPL		phosphatase				0.00162	SPP1
RASSF7		other				0.00162	CCND1
PES1		other				0.00162	CCND1
RBBP8		enzyme				0.00162	CCND1
CYP2C9		enzyme				0.00162	CCND1
RDH16		enzyme				0.00162	CCND1
ATAD2		enzyme				0.00162	CCND1
(E)-1-(2-nitrovinyl)naphthalene		chemical reagent				0.00162	CCND1
(E)-9-(2-nitrovinyl)anthracene		chemical reagent				0.00162	CCND1
rocuronium		chemical drug				0.00162	CCND1
natamycin		chemical drug				0.00162	SPP1
tarenflurbil		chemical drug				0.00162	CCND1
betamethasone valerate		chemical drug				0.00162	CCND1
R-etodolac		chemical drug				0.00162	CCND1
mizoribine		chemical drug				0.00162	CCND1
ponasterone A		chemical reagent				0.00162	CCND1
Rxr		group				0.00167	APOE,SPP1
SB-431542		chemical reagent				0.00167	CCND1,SPP1
LEP		growth factor				0.00178	CCND1,HES1,SPP1	3 (3)
1,4-bis[2-(3,5-dichloropyridyloxy)]benzene		chemical toxicant				0.00182	CCND1,Sult1a1
rosiglitazone		chemical drug				0.00185	ADAMTS1,APOE,CCND1
Ifn		group				0.00188	ADAMTS1,SPP1
POU2F1		transcription regulator				0.00188	CCND1,SPP1
GW3965		chemical reagent				0.00188	Apoc1,APOE
Histone h3		group				0.00189	CCND1,HES1,SPP1
AGT		growth factor				0.00189	CCND1,HES1,SPP1	3 (3)
TP63		transcription regulator				0.00189	ADAMTS1,CCND1,HES1
GSK3B		kinase				0.00191	CCND1,SPP1
PRKCA		kinase				0.00194	CCND1,HES1
SRC		kinase				0.00194	CCND1,SPP1
lithium chloride		chemical drug				0.00194	CCND1,HES1
PARP1		enzyme				0.00197	CCND1,HES1
GNAQ		enzyme				0.00197	ADAMTS1,CCND1
Insulin		group				0.00198	APOE,CCND1,HES1	3 (2)
RUNX2		transcription regulator				0.002	CCND1,SPP1
HNF1A		transcription regulator				0.00202	CBS/CBSL,CCND1,PIGR
RUNX3		transcription regulator				0.00203	CCND1,SPP1
TNF		cytokine		1.086	bias	0.00207	APOE,CCND1,HES1,PIGR,SPP1
CGP 74514A		chemical - kinase inhibitor				0.00216	CCND1
L-alanine		chemical - endogenous mammalian				0.00216	CCND1
inecalcitol		chemical drug				0.00216	CCND1
CINP		other				0.00216	CCND1
DNAJB4		other				0.00216	CCND1
Meg3		other				0.00216	HES1
TEX11		other				0.00216	CCND1
Slfn1		enzyme				0.00216	CCND1
receptor protein tyrosine kinase		group				0.00216	SPP1
ORAI3		other				0.00216	CCND1
MUCL1		other				0.00216	CCND1
SLC39A4		transporter				0.00216	CCND1
DACT3		other				0.00216	CCND1
EIF3I		translation regulator				0.00216	CCND1
ENPP1		enzyme				0.00216	SPP1
TLCD3A		other				0.00216	CCND1
CDC25B		phosphatase				0.00216	CCND1
ADRA2B		G-protein coupled receptor				0.00216	CCND1
CBFA2T2		transcription regulator				0.00216	HES1
ANKH		transporter				0.00216	SPP1
SEPTIN9		enzyme				0.00216	CCND1
GALR1		G-protein coupled receptor				0.00216	CCND1
parbendazole		chemical reagent				0.00216	SPP1
DLL3		other				0.00216	HES1
UBTF		transcription regulator				0.00216	CCND1
CTNNAL1		other				0.00216	CCND1
SNRK		kinase				0.00216	CCND1
RAPGEF4		other				0.00216	SPP1
2-[[4-[(e)-styryl]phenoxy]methyl]oxirane		chemical reagent				0.00216	APOE
S3I-1757		chemical reagent				0.00216	CCND1
PLAC8		other				0.00216	CCND1
SLC9A3R2		transporter				0.00216	CCND1
ARF1		enzyme				0.00216	CCND1
SLC20A2		transporter				0.00216	SPP1
LY5		chemical reagent				0.00216	CCND1
carboxyamido-triazole		chemical drug				0.00216	CCND1
acetoacetic acid		chemical - endogenous mammalian				0.00216	CCND1
tirapazamine		chemical drug				0.00216	SPP1
KP-SD-1		chemical - kinase inhibitor				0.00216	CCND1
sodium phosphate		chemical drug				0.00216	SPP1
durapatite		chemical - endogenous mammalian				0.00216	SPP1
gemcabene		chemical drug				0.00216	APOE
L-asparagine		chemical - endogenous mammalian				0.00216	CCND1
Collagen type VI		complex				0.00216	CCND1
DP-001		chemical drug				0.00216	SPP1
WNT5A		cytokine				0.00216	CCND1,SPP1
IRS1		enzyme				0.0022	CCND1,SPP1
MET		kinase				0.0022	CCND1,SPP1
CX3CL1		cytokine				0.00223	ADAMTS1,SPP1
TP53		transcription regulator		1.154		0.00236	APOE,CCND1,HES1,OAT,SPP1
AR		ligand-dependent nuclear receptor				0.00243	CCND1,PIGR,SPP1
TERT		enzyme				0.00254	CCND1,SPP1
mibolerone		chemical drug				0.00254	CCND1,Wfdc3
methylprednisolone		chemical drug				0.00261	CCND1,PIGR,Sult1a1
lipopolysaccharide		chemical drug		0.954	bias	0.00262	APOE,CCND1,HES1,PIGR,SPP1
ACOX1		enzyme				0.00268	ADAMTS1,OAT
EGF		growth factor				0.00269	CCND1,HES1,SPP1	3 (3)
L-aspartic acid		chemical - endogenous mammalian				0.0027	CCND1
p38 Sapk		group				0.0027	CCND1
ILX-23-7553		chemical drug				0.0027	CCND1
RNF187		enzyme				0.0027	CCND1
KLF8		transcription regulator				0.0027	CCND1
elocalcitol		chemical drug				0.0027	SPP1
ZMIZ2		transcription regulator				0.0027	CCND1
TTYH1		ion channel				0.0027	HES1
CDH16		enzyme				0.0027	CCND1
2,3-bis(3'-hydroxybenzyl)butane-1,4-diol		chemical - endogenous mammalian				0.0027	SPP1
Cathepsin		group				0.0027	CCND1
FZD7		G-protein coupled receptor				0.0027	CCND1
MCF2		other				0.0027	CCND1
GAS7		transcription regulator				0.0027	SPP1
WSB1		other				0.0027	ALDOC
rigosertib		chemical drug				0.0027	CCND1
RBM14		transcription regulator				0.0027	CCND1
FLOT1		other				0.0027	CCND1
PSAP		enzyme				0.0027	CCND1
PORCN		enzyme				0.0027	CCND1
BCAR3		other				0.0027	CCND1
CEL		enzyme				0.0027	CCND1
PRMT2		enzyme				0.0027	CCND1
ECT2		other				0.0027	CCND1
VCAM1		transmembrane receptor				0.0027	CCND1
CDC27		other				0.0027	CCND1
CDH13		other				0.0027	CCND1
KRT10		other				0.0027	CCND1
Muc1		transmembrane receptor				0.0027	CCND1
CLDN2		other				0.0027	CCND1
scoparone		chemical - endogenous non-mammalian				0.0027	CCND1
silicon phthalocyanine		chemical drug				0.0027	CCND1
temsirolimus		chemical drug				0.0027	CCND1
4-aminophenol		chemical - endogenous mammalian				0.0027	SPP1
ciprofibrate		chemical drug				0.00272	ADAMTS1,OAT
LEF1		transcription regulator				0.00287	CCND1,SPP1
JUNB		transcription regulator				0.0029	CCND1,HES1
Nr1h		group				0.00302	Apoc1,APOE
CREM		transcription regulator				0.00306	APOE,CCND1
alitretinoin		chemical drug				0.00313	CCND1,SPP1
aldosterone		chemical - endogenous mammalian				0.00313	ADAMTS1,SPP1
medroxyprogesterone acetate		chemical drug				0.00317	ADAMTS1,CCND1
calcitriol		chemical drug				0.00318	CCND1,OAT,SPP1
INS		other				0.00321	CBS/CBSL,CCND1
vanillyl-N-nonylamide		chemical drug				0.00324	CCND1
DBH-AS1		other				0.00324	CCND1
BICC1		other				0.00324	PIGR
EIF4A3		enzyme				0.00324	CCND1
ZMIZ1		other				0.00324	HES1
ANKHD1/ANKHD1-EIF4EBP3		other				0.00324	CCND1
Crnde		other				0.00324	CCND1
BPIFB1		other				0.00324	CCND1
EN2		transcription regulator				0.00324	ALDOC
RO4929097		chemical drug				0.00324	HES1
PXN		other				0.00324	CCND1
PLSCR1		enzyme				0.00324	CCND1
BAD		other				0.00324	CCND1
Pzp		other				0.00324	APOE
SLC7A11-AS1		other				0.00324	CCND1
mir-637		microRNA				0.00324	CCND1
EGFL7		other				0.00324	HES1
SNIP1		other				0.00324	CCND1
THBS2		other				0.00324	HES1
ETV3		transcription regulator				0.00324	SPP1
TRPC3		ion channel				0.00324	CCND1
SIX3		transcription regulator				0.00324	CCND1
STX2		transporter				0.00324	CCND1
TFF2		other				0.00324	CCND1
YWHAB		other				0.00324	CCND1
OMP-52M51		biologic drug				0.00324	HES1
CXXC4		other				0.00324	CCND1
CIMO		chemical reagent				0.00324	CCND1
dibenzoylmethane		chemical toxicant				0.00324	CCND1
GSI34		chemical reagent				0.00324	CCND1
Z-VEID-FMK		chemical reagent				0.00324	CCND1
3',4',7-trihydroxyisoflavone		chemical - endogenous non-mammalian				0.00324	CCND1
nitric oxide		chemical - endogenous mammalian				0.00325	CCND1,SPP1
PML		transcription regulator				0.0035	APOE,CCND1
IGF2		growth factor				0.00366	CCND1,SPP1
S100A9		other				0.00366	ADAMTS1,CCND1
pioglitazone		chemical drug				0.0037	APOE,CCND1
MAPK8		kinase				0.00375	APOE,CCND1
SMARCB1		transcription regulator				0.00375	CCND1,HES1
camptothecin		chemical drug				0.00378	APOE,CCND1,SPP1	3 (2)
L-proline		chemical - endogenous mammalian				0.00378	CCND1
24(S),25-epoxycholesterol		chemical - endogenous mammalian				0.00378	APOE
ISX		transcription regulator				0.00378	CCND1
AKIRIN2		other				0.00378	CCND1
C1orf61		other				0.00378	CCND1
ATE1		enzyme				0.00378	CCND1
RAP1GAP		other				0.00378	CCND1
CCN4		other				0.00378	CCND1
CBR3-AS1		other				0.00378	CCND1
RAX		transcription regulator				0.00378	HES1
DAB2		other				0.00378	CCND1
PDE3A		enzyme				0.00378	CCND1
BANCR		other				0.00378	CCND1
KHDRBS1		transcription regulator				0.00378	CCND1
G3BP1		enzyme				0.00378	SPP1
FZD5		G-protein coupled receptor				0.00378	SPP1
MIB1		enzyme				0.00378	HES1
SHCBP1		other				0.00378	CCND1
CAPNS1		peptidase				0.00378	CCND1
ITGB8		other				0.00378	APOE
SNW1		transcription regulator				0.00378	CCND1
TNIK		kinase				0.00378	CCND1
aminoglutethimide		chemical drug				0.00378	SPP1
polyphosphate		chemical - endogenous mammalian				0.00378	SPP1
retroinverso ERG inhibitory peptide 2		chemical reagent				0.00378	ADAMTS1
retroinverso ERG inhibitory peptide 1		chemical reagent				0.00378	ADAMTS1
TRKC-miR2		microRNA				0.00378	CCND1
cyclosporin		biologic drug				0.00378	CCND1
non-esterified fatty acid		chemical - endogenous mammalian				0.00378	APOE
20alpha-hydroxycholesterol		chemical - endogenous mammalian				0.00378	APOE
MYB		transcription regulator				0.00396	CCND1,SPP1
S100A8		other				0.00414	ADAMTS1,CCND1
2-(4-amino-1-isopropyl-1H-pyrazolo[3,4-d]pyrimidin-3-yl)-1H-indol-5-ol		chemical reagent				0.00418	ADAMTS1,CCND1
HOXA10		transcription regulator				0.00423	APOE,PIGR
ESRRA		ligand-dependent nuclear receptor				0.00427	ALDOC,SPP1
pyrophosphate		chemical - endogenous mammalian				0.00432	SPP1
N-Cadherin		group				0.00432	CCND1
6-amino-4-(4-phenoxyphenylethylamino)quinazoline		chemical reagent				0.00432	APOE
rhodamine 6G		chemical toxicant				0.00432	CCND1
L-type Calcium Channel		complex				0.00432	APOE
UCA1		other				0.00432	CCND1
LINC00461		other				0.00432	CCND1
1,3-bis(4-hydroxyphenyl)-4-methyl-5-[4-(2-piperidinylethoxy)phenol]-1H-pyrazole		chemical reagent				0.00432	CCND1
VTCN1		other				0.00432	CCND1
FOXD2-AS1		other				0.00432	HES1
TACSTD2		other				0.00432	CCND1
ARHGEF1		other				0.00432	CCND1
evofosfamide		chemical drug				0.00432	CCND1
PDLIM7		other				0.00432	SPP1
FANCA		other				0.00432	HES1
S100a7a		other				0.00432	CCND1
CXCR1		G-protein coupled receptor				0.00432	CCND1
MAOA		enzyme				0.00432	CCND1
MFGE8		other				0.00432	CCND1
DES		other				0.00432	SPP1
ARAF		kinase				0.00432	CCND1
DGKZ		kinase				0.00432	CCND1
WNT7B		other				0.00432	CCND1
MSI1		other				0.00432	HES1
PPP1CA		phosphatase				0.00432	SPP1
PIWIL2		enzyme				0.00432	CCND1
SULF1		enzyme				0.00432	CCND1
CCDC80		other				0.00432	CCND1
RBCK1		transcription regulator				0.00432	CCND1
cariporide		chemical drug				0.00432	SPP1
naproxen		chemical drug				0.00432	CCND1
vandetanib		chemical drug				0.00432	CCND1
5-nitro-2-(3-phenylpropylamino)benzoic acid		chemical reagent				0.00432	CCND1
SS18-SSX1		fusion gene/product				0.00432	CCND1
JNJ-39933673		chemical reagent				0.00432	SPP1
artemisinin		chemical drug				0.00432	CCND1
15-deoxy-delta-12,14 -PGJ 2		chemical - endogenous mammalian				0.00437	CCND1,SPP1
8-bromo-cAMP		chemical reagent				0.00437	CCND1,SPP1
IRF1		transcription regulator				0.00441	CCND1,PIGR
NFkB (complex)		complex				0.00442	APOE,CCND1,SPP1
EGR1		transcription regulator				0.0045	CCND1,SPP1
PDX1		transcription regulator				0.0045	CCND1,SPP1
MAPK14		kinase				0.0046	CCND1,SPP1
mir-8		microRNA				0.00464	ADAMTS1,CCND1
nicotine		chemical drug				0.00469	CCND1,SPP1
MAP2K1		kinase				0.00474	APOE,CCND1
RORA		ligand-dependent nuclear receptor				0.00474	APOE,Sult1a1
bexarotene		chemical drug				0.00474	APOE,CCND1
MSGN1		transcription regulator				0.00486	HES1
Mir218		microRNA				0.00486	SPP1
(-)-epicatechin gallate		chemical - endogenous non-mammalian				0.00486	SPP1
Bcl9-Cbp/p300-Ctnnb1-Lef/Tcf		complex				0.00486	CCND1
BMS-387032		chemical drug				0.00486	CCND1
MEMO1		other				0.00486	CCND1
VWF		other				0.00486	HES1
AKAP12		transporter				0.00486	CCND1
BANP		other				0.00486	CCND1
MED15		transcription regulator				0.00486	CCND1
PRKCG		kinase				0.00486	CCND1
salinomycin		chemical - endogenous non-mammalian				0.00486	CCND1
genipin		chemical - endogenous non-mammalian				0.00486	CCND1
WNT5B		other				0.00486	CCND1
CCND2		other				0.00486	CCND1
MSH2		enzyme				0.00486	CCND1
PINK1		kinase				0.00486	CCND1
YBX3		transcription regulator				0.00486	CCND1
BRMS1		transcription regulator				0.00486	SPP1
RECK		other				0.00486	CCND1
thiocoraline		chemical reagent				0.00486	HES1
cyclopentenone		chemical reagent				0.00486	CCND1
I-BOP		chemical reagent				0.00486	CCND1
lead acetate		chemical toxicant				0.00486	CCND1
TREM1		transmembrane receptor				0.00493	HES1,SPP1
TGFBR2		kinase				0.00503	CCND1,SPP1
Immunoglobulin		complex				0.00513	CBS/CBSL,SPP1,Sult1a1
HRAS		enzyme				0.00517	CCND1,HES1,SPP1	3 (3)
GATA4		transcription regulator				0.00523	HES1,SPP1
deferoxamine		chemical drug				0.00523	CCND1,SPP1
ESR1		ligand-dependent nuclear receptor		1.923		0.00527	APOE,CCND1,HES1,SPP1	4 (2)
L-threonine		chemical - endogenous mammalian				0.0054	CCND1
TEAD		group				0.0054	CCND1
CAMK2N2		other				0.0054	CCND1
PARP		group				0.0054	APOE
NQO2		enzyme				0.0054	CCND1
RBPJL		transcription regulator				0.0054	HES1
JMJD6		transmembrane receptor				0.0054	CCND1
cercosporin		chemical - endogenous non-mammalian				0.0054	CCND1
PPM1D		phosphatase				0.0054	CCND1
MLH1		enzyme				0.0054	CCND1
SETD7		enzyme				0.0054	CCND1
EXT1		enzyme				0.0054	CCND1
IQGAP1		other				0.0054	CCND1
GNA11		enzyme				0.0054	ADAMTS1
DHH		peptidase				0.0054	ADAMTS1
AEBP1		peptidase				0.0054	APOE
CDKN1C		other				0.0054	CCND1
FUS		transcription regulator				0.0054	CCND1
S100P		other				0.0054	CCND1
PRKCH		kinase				0.0054	CCND1
gamma-secretase inhibitor XX		chemical reagent				0.0054	HES1
2-hydroxy-1-naphthylaldehyde isonicotinoyl hydrazone		chemical reagent				0.0054	CCND1
quinidine		chemical drug				0.0054	CCND1
atorvastatin		chemical drug				0.00548	APOE,SPP1
CD44		other				0.00553	CCND1,SPP1
BMP2		growth factor				0.00553	CCND1,SPP1
PAX6		transcription regulator				0.00558	CCND1,HES1
BMP4		growth factor				0.00563	CCND1,HES1
GLI1		transcription regulator				0.00568	CCND1,SPP1
CHUK		kinase				0.00568	CCND1,SPP1
Jnk		group				0.00584	CCND1,HES1
SP3		transcription regulator				0.00584	CBS/CBSL,CCND1
L-serine		chemical - endogenous mammalian				0.00593	CCND1
echinomycin		chemical drug				0.00593	ADAMTS1
Adaptor protein 2		complex				0.00593	PIGR
SNHG20		other				0.00593	CCND1
OIP5-AS1		other				0.00593	CCND1
MCL1		transporter				0.00593	CCND1
DYRK1B		kinase				0.00593	CCND1
miR-208a-3p (and other miRNAs w/seed UAAGACG)		mature microRNA				0.00593	SPP1
miR-193a-3p (and other miRNAs w/seed ACUGGCC)		mature microRNA				0.00593	CCND1
PTCSC3		other				0.00593	CCND1
RUVBL2		transcription regulator				0.00593	CCND1
LNX2		other				0.00593	HES1
2-[[9-isopropyl-6-[[4-(2-pyridyl)phenyl]methylamino]purin-2-yl]amino]butan-1-ol		chemical - kinase inhibitor				0.00593	CCND1
UBR5		enzyme				0.00593	CCND1
doxazosin		chemical drug				0.00593	SPP1
bosutinib		chemical drug				0.00593	CCND1
clioquinol		chemical drug				0.00593	CCND1
7-(4-fluorobenzylamino)-1,3,4,8-tetrahydropyrrolo[4,3,2-de]quinolin-8(1H)-one		chemical reagent				0.00593	CCND1
SS18-SSX2		fusion gene/product				0.00593	CCND1
adaphostin		chemical drug				0.00593	CCND1
dextran		chemical drug				0.00593	APOE
canrenoate potassium		chemical drug				0.00593	SPP1
Cu2+		chemical - endogenous mammalian				0.00593	CCND1
ETS1		transcription regulator				0.00621	CCND1,SPP1
NR1H3		ligand-dependent nuclear receptor				0.00632	Apoc1,APOE
PAX3-FOXO1		fusion gene/product				0.00632	CCND1,SPP1
embelin		chemical - endogenous non-mammalian				0.00647	CCND1
CLEC1B		transmembrane receptor				0.00647	SPP1
E2F8		transcription regulator				0.00647	CCND1
S100A12		other				0.00647	CCND1
VGLL3		other				0.00647	SPP1
STAR		transporter				0.00647	SPP1
CTNNBIP1		other				0.00647	CCND1
CIC		transcription regulator				0.00647	CCND1
miR-451a (and other miRNAs w/seed AACCGUU)		mature microRNA				0.00647	CCND1
RB1CC1		other				0.00647	CCND1
LMO4		transcription regulator				0.00647	CCND1
CCNT1		transcription regulator				0.00647	CCND1
BEX2		other				0.00647	SPP1
PITX1		transcription regulator				0.00647	CCND1
HNRNPAB		enzyme				0.00647	SPP1
clotrimazole		chemical drug				0.00647	CCND1
myristoylated protein kinase A inhibitor 14-22 amide		chemical - kinase inhibitor				0.00647	CCND1
Mek		group				0.00654	APOE,CCND1
TGM2		enzyme				0.00654	CCND1,SPP1
EPAS1		transcription regulator				0.00665	ALDOC,CCND1
streptozocin		chemical drug				0.00687	CBS/CBSL,SPP1
WT1		transcription regulator				0.00687	CBS/CBSL,CCND1
dehydroepiandrosterone sulfate		chemical - endogenous mammalian				0.00701	CCND1
neomycin		chemical drug				0.00701	HES1
desoxycorticosterone		chemical - endogenous mammalian				0.00701	SPP1
ladostigil		chemical drug				0.00701	ALDOC
LXR ligand-LXR-Retinoic acid-RXRα		complex				0.00701	APOE
perhexiline		chemical drug				0.00701	HES1
GPBAR1		G-protein coupled receptor				0.00701	CCND1
CSNK2B		kinase				0.00701	CCND1
UBA1		enzyme				0.00701	CCND1
HBP1		transcription regulator				0.00701	CCND1
JARID2		transcription regulator				0.00701	CCND1
BCAR1		enzyme				0.00701	CCND1
XRCC5		enzyme				0.00701	APOE
AIF1		other				0.00701	CCND1
LMX1A		transcription regulator				0.00701	HES1
FZR1		kinase				0.00701	CCND1
VEGFD		growth factor				0.00701	CCND1
PPP5C		phosphatase				0.00701	CCND1
CAMKK2		kinase				0.00701	CCND1
vatalanib		chemical drug				0.00701	CCND1
1,2-dimethylhydrazine		chemical toxicant				0.00701	CCND1
gambogic acid		chemical - endogenous non-mammalian				0.00701	CCND1
VDR		transcription regulator				0.00705	CCND1,SPP1
MITF		transcription regulator				0.00705	APOE,HES1
N-acetyl-L-cysteine		chemical drug				0.0071	CCND1,SPP1
actinomycin D		biologic drug				0.00716	CCND1,SPP1
methotrexate		chemical drug				0.00739	CCND1,SPP1
5'-methylthioadenosine		chemical - endogenous mammalian				0.00755	CCND1
GON4L		transcription regulator				0.00755	CCND1
Rac		group				0.00755	CCND1
dihydroartemisinin		chemical drug				0.00755	CCND1
TCF/LEF		group				0.00755	CCND1
NAE1		enzyme				0.00755	CCND1
PECAM1		other				0.00755	CCND1
MK2206		chemical drug				0.00755	CCND1
NDUFA13		enzyme				0.00755	CCND1
GHRHR		G-protein coupled receptor				0.00755	CCND1
TFCP2		transcription regulator				0.00755	SPP1
SRSF3		other				0.00755	CCND1
MGAT3		enzyme				0.00755	HES1
TRAF4		other				0.00755	CCND1
IQGAP2		other				0.00755	CCND1
HOXA4		transcription regulator				0.00755	CCND1
GABBR1		G-protein coupled receptor				0.00755	SPP1
GTF2I		transcription regulator				0.00755	CCND1
picryl chloride		chemical toxicant				0.00755	SPP1
gamma-tocotrienol		chemical drug				0.00755	CCND1
N1,N11-diethylnorspermine		chemical drug				0.00755	CCND1
anti-benzo(a)pyrene-diol-epoxide		chemical toxicant				0.00755	CCND1
hyperforin		chemical drug				0.00755	SPP1
noscapine		chemical drug				0.00755	CCND1
cyproterone acetate		chemical drug				0.00755	CCND1
onapristone		chemical drug				0.00755	ADAMTS1
Cd2+		chemical toxicant				0.00755	CCND1
IL1A		cytokine				0.00775	ADAMTS1,SPP1
tacrolimus		chemical drug				0.00775	CCND1,SPP1
IKZF1		transcription regulator				0.00787	HES1,Sult1a1
methylselenic acid		chemical reagent				0.00787	ADAMTS1,CCND1
SREBF1		transcription regulator				0.00793	ALDOC,OAT
thioacetamide		chemical toxicant				0.00793	ADAMTS1,SPP1
PPARD		ligand-dependent nuclear receptor				0.00805	APOE,CCND1
amphotericin B		chemical drug				0.00808	SPP1
nystatin		chemical drug				0.00808	SPP1
lonafarnib		chemical drug				0.00808	CCND1
1'-acetoxychavicol acetate		chemical reagent				0.00808	CCND1
THRAP3		transcription regulator				0.00808	CCND1
FNDC5		other				0.00808	SPP1
48s		complex				0.00808	CCND1
IGFBP7		transporter				0.00808	CCND1
Retnla		other				0.00808	HES1
Betacatenin/TCF		complex				0.00808	CCND1
PLCG1		enzyme				0.00808	CCND1
POU3F2		transcription regulator				0.00808	ALDOC
CDH2		other				0.00808	CCND1
miR-19b-3p (and other miRNAs w/seed GUGCAAA)		mature microRNA				0.00808	CCND1
PER2		transcription regulator				0.00808	CCND1
HOXC9		transcription regulator				0.00808	SPP1
KIF1B		transporter				0.00808	CCND1
SP2		transcription regulator				0.00808	CCND1
SP7		transcription regulator				0.00808	SPP1
L-685,458		chemical - protease inhibitor				0.00808	HES1
pimozide		chemical drug				0.00808	CCND1
N-ethyl-N-nitrosourea		chemical toxicant				0.00808	SPP1
zinc protoporphyrin IX		chemical - endogenous mammalian				0.00808	CCND1
taxifolin		chemical - endogenous non-mammalian				0.00808	APOE
24-hydroxycholesterol		chemical - endogenous mammalian				0.00808	APOE
epoprostenol		chemical - endogenous mammalian				0.00862	SPP1
prostaglandin A2		chemical - endogenous non-mammalian				0.00862	CCND1
Stat5 dimer		complex				0.00862	CCND1
TMEM8B		other				0.00862	CCND1
Nkx2-2os		other				0.00862	CCND1
NTF4		growth factor				0.00862	SPP1
C1QBP		transcription regulator				0.00862	CCND1
PMP22		other				0.00862	APOE
KLF9		transcription regulator				0.00862	CCND1
H1-2		other				0.00862	CCND1
miR-100-5p (and other miRNAs w/seed ACCCGUA)		mature microRNA				0.00862	CCND1
SFRP4		transmembrane receptor				0.00862	CCND1
EPHX2		enzyme				0.00862	HES1
DIRAS3		enzyme				0.00862	CCND1
OSBPL8		transporter				0.00862	APOE
DDX3X		enzyme				0.00862	CCND1
PRDX2		enzyme				0.00862	CCND1
CNR2		G-protein coupled receptor				0.00862	CCND1
cystamine		chemical drug				0.00862	SPP1
2-acetylaminofluorene		chemical toxicant				0.00862	CCND1
myricetin		chemical - endogenous non-mammalian				0.00862	CCND1
morin		chemical - endogenous non-mammalian				0.00862	CCND1
cyclic AMP		chemical - endogenous mammalian				0.00873	CCND1,OAT
Ca2+		chemical - endogenous mammalian				0.00879	CCND1,SPP1
NRG1		growth factor				0.00899	CCND1,HES1
NFYB		transcription regulator				0.00905	CBS/CBSL,OAT
SMAD3		transcription regulator				0.00905	CCND1,SPP1
TNFSF11		cytokine				0.00905	CCND1,SPP1
NFkB (family)		group				0.00916	CCND1
Integrin		complex				0.00916	CCND1
PPP1R1B		phosphatase				0.00916	CCND1
GIP		other				0.00916	SPP1
GPI		enzyme				0.00916	CCND1
DNAJB6		transcription regulator				0.00916	SPP1
PIM2		kinase				0.00916	CCND1
DDX17		enzyme				0.00916	CCND1
CCAT2		other				0.00916	CCND1
DAXX		transcription regulator				0.00916	CCND1
SMAD6		transcription regulator				0.00916	SPP1
decursin		chemical - endogenous non-mammalian				0.00916	CCND1
zearalenone		chemical toxicant				0.00916	CCND1
oxysterol		chemical - endogenous mammalian				0.00916	APOE
ethidium		chemical drug				0.00916	CCND1
vorinostat		chemical drug				0.00918	ADAMTS1,CCND1
fulvestrant		chemical drug				0.00937	CCND1,HES1
YAP1		transcription regulator				0.00937	ADAMTS1,CCND1
THRB		ligand-dependent nuclear receptor				0.00944	CCND1,SPP1
NR4A1		ligand-dependent nuclear receptor				0.00944	APOE,CCND1
NFKB1		transcription regulator				0.00944	APOE,CCND1
glycine		chemical - endogenous mammalian				0.00969	CCND1
N(6)-(3-iodobenzyl)-5'-N-methylcarboxamidoadenosine		chemical drug				0.00969	CCND1
alpha-amanitin		chemical toxicant				0.00969	CCND1
Fgfr		group				0.00969	SPP1
Gli		group				0.00969	CCND1
Pdgf Ab		complex				0.00969	CCND1
PI-103		chemical - kinase inhibitor				0.00969	CCND1
GLIS2		transcription regulator				0.00969	CCND1
mir-203		microRNA				0.00969	HES1
mir-154		microRNA				0.00969	CCND1
AKR1B1		enzyme				0.00969	CCND1
ATP2A2		transporter				0.00969	CCND1
ITGAL		transmembrane receptor				0.00969	HES1
XPO1		transporter				0.00969	CCND1
CREB3L1		transcription regulator				0.00969	SPP1
indirubin		chemical drug				0.00969	CCND1
acyclic retinoid		chemical drug				0.00969	CCND1
acadesine		chemical drug				0.00969	OAT
PRL		cytokine				0.00983	CCND1,SPP1
resiquimod		chemical drug				0.01	HES1,SPP1
calcipotriene		chemical drug				0.0102	SPP1
Rp-cAMPS		chemical - kinase inhibitor				0.0102	SPP1
trastuzumab		biologic drug				0.0102	CCND1
Ren2		peptidase				0.0102	SPP1
TMSB4		group				0.0102	SPP1
selumetinib		chemical drug				0.0102	CCND1
SULF2		enzyme				0.0102	CCND1
NUMB		other				0.0102	HES1
CTBP2		transcription regulator				0.0102	CCND1
PTPN2		phosphatase				0.0102	CCND1
miR-503-5p (miRNAs w/seed AGCAGCG)		mature microRNA				0.0102	CCND1
GAS5		other				0.0102	CCND1
ITGB4		transmembrane receptor				0.0102	CCND1
NT5E		phosphatase				0.0102	SPP1
KCNIP3		transcription regulator				0.0102	CCND1
HNRNPU		transporter				0.0102	SPP1
BACH1		transcription regulator				0.0102	SPP1
MST1R		kinase				0.0102	CCND1
MUC4		other				0.0102	CCND1
ACTN4		transcription regulator				0.0102	CCND1
ethosuximide		chemical drug				0.0102	CCND1
vitamin K2		chemical drug				0.0102	SPP1
lycopene		chemical drug				0.0102	CCND1
vanadate		chemical - other				0.0102	CCND1
STK11		kinase				0.0102	CCND1,SPP1
STAT5A		transcription regulator				0.0103	APOE,CCND1
Tgf beta		group				0.0106	CCND1,SPP1
ZNF202		transcription regulator				0.0108	APOE
STAP2		other				0.0108	CCND1
GDF15		growth factor				0.0108	CCND1
miR-296-5p (miRNAs w/seed GGGCCCC)		mature microRNA				0.0108	CCND1
KLF10		transcription regulator				0.0108	CCND1
CCND3		kinase				0.0108	CCND1
S1PR1		G-protein coupled receptor				0.0108	CCND1
HRG		other				0.0108	SPP1
PPP1R15A		other				0.0108	CCND1
CSNK2A1		kinase				0.0108	CCND1
1-methyl-4-phenylpyridinium		chemical toxicant				0.0108	CCND1
sulfasalazine		chemical drug				0.0108	CCND1
salvin		chemical toxicant				0.0108	CCND1
resveratrol		chemical drug				0.0108	CCND1,SPP1
AKT1		kinase				0.0109	CCND1,SPP1
DICER1		enzyme				0.0109	CCND1,HES1
glucocorticoid		chemical drug				0.0109	PIGR,SPP1
PI3K (complex)		complex				0.0109	CCND1,SPP1
Ras homolog		group				0.0113	CCND1
Aldose Reductase		group				0.0113	CCND1
salinosporamide A		chemical drug				0.0113	CCND1
Hmgb1		transcription regulator				0.0113	CCND1
AChR		complex				0.0113	ALDOC
SRA1		transcription regulator				0.0113	HES1
HOXA11		transcription regulator				0.0113	SPP1
XRCC6		enzyme				0.0113	APOE
SPZ1		transcription regulator				0.0113	CCND1
EDN3		other				0.0113	CCND1
mir-31		microRNA				0.0113	SPP1
miR-23a-3p (and other miRNAs w/seed UCACAUU)		mature microRNA				0.0113	HES1
FOXF1		transcription regulator				0.0113	CCND1
HDAC7		transcription regulator				0.0113	CCND1
GNAI3		enzyme				0.0113	SPP1
PER1		transcription regulator				0.0113	CCND1
AXIN1		other				0.0113	CCND1
SIN3B		transcription regulator				0.0113	HES1
SCX		transcription regulator				0.0113	SPP1
DDX5		enzyme				0.0113	CCND1
ADORA3		G-protein coupled receptor				0.0113	SPP1
HMGA2		enzyme				0.0113	SPP1
PCDH11Y		other				0.0113	CCND1
PD 169316		chemical - kinase inhibitor				0.0113	CCND1
PD 153035		chemical drug				0.0113	CCND1
epirubicin		chemical drug				0.0113	CCND1
ERK1/2		group				0.0116	CCND1,SPP1
diethylstilbestrol		chemical drug				0.0118	CCND1,PIGR
IKK (complex)		complex				0.0118	CCND1
cis-urocanic acid		chemical drug				0.0118	ADAMTS1
MFSD2A		transporter				0.0118	ALDOC
LGR5		transmembrane receptor				0.0118	OAT
WDR5		transcription regulator				0.0118	SPP1
MAPK8IP1		other				0.0118	CCND1
TRPC1		ion channel				0.0118	CCND1
MAPK12		kinase				0.0118	CCND1
ITGAM		transmembrane receptor				0.0118	APOE
NFIX		transcription regulator				0.0118	CCND1
MAP3K5		kinase				0.0118	CCND1
ACVR1C		kinase				0.0118	CCND1
CCN3		growth factor				0.0118	HES1
EPCAM		other				0.0118	CCND1
GRN		growth factor				0.0118	CCND1
CYP27A1		enzyme				0.0118	APOE
RAPGEF3		other				0.0118	SPP1
PDGFC		growth factor				0.0118	CCND1
bilirubin		chemical - endogenous mammalian				0.0118	CCND1
beta-glycerophosphoric acid		chemical - endogenous mammalian				0.0118	SPP1
IL10RA		transmembrane receptor				0.0119	CBS/CBSL,Sult1a1
pregna-4,17-diene-3,16-dione		chemical - endogenous non-mammalian				0.0124	CCND1
alvespimycin		chemical drug				0.0124	CCND1
LMX1B		transcription regulator				0.0124	HES1
MGP		other				0.0124	SPP1
TF		transporter				0.0124	CCND1
miR-18a-5p (and other miRNAs w/seed AAGGUGC)		mature microRNA				0.0124	CCND1
IGFBP5		other				0.0124	CCND1
MAP2K5		kinase				0.0124	CCND1
PHB		transcription regulator				0.0124	CCND1
TFPI2		other				0.0124	CCND1
MBD1		transcription regulator				0.0124	APOE
FOXF2		transcription regulator				0.0124	CCND1
DYRK1A		kinase				0.0124	CCND1
CETP		enzyme				0.0124	APOE
PD184352		chemical drug				0.0124	CCND1
dipyridamole		chemical drug				0.0124	SPP1
evodiamine		chemical - endogenous non-mammalian				0.0124	CCND1
zerumbone		chemical - endogenous non-mammalian				0.0129	CCND1
Ikb		group				0.0129	CCND1
NFAT (complex)		complex				0.0129	SPP1
Ciap		group				0.0129	CCND1
TNFRSF11B		transmembrane receptor				0.0129	SPP1
BTRC		enzyme				0.0129	CCND1
HEY1		transcription regulator				0.0129	OAT
Mt2		other				0.0129	CCND1
SB 290157		chemical reagent				0.0129	SPP1
diosgenin		chemical - endogenous non-mammalian				0.0129	CCND1
Creb		group				0.013	CCND1,HES1
TCF7L2		transcription regulator				0.0132	CCND1,SPP1
PDGF BB		complex				0.0134	CCND1,HES1
deoxycorticosterone acetate		chemical drug				0.0134	SPP1
dibutyl phthalate		chemical toxicant				0.0134	SPP1
plumbagin		chemical toxicant				0.0134	CCND1
BMP		group				0.0134	SPP1
calpain		complex				0.0134	CCND1
FXR ligand-FXR-Retinoic acid-RXRα		complex				0.0134	APOE
NCOR-LXR-Oxysterol-RXR-9 cis RA		complex				0.0134	APOE
GHRH		other				0.0134	CCND1
NODAL		growth factor				0.0134	CCND1
SLPI		other				0.0134	CCND1
BCL2L11		other				0.0134	CCND1
SOX6		transcription regulator				0.0134	CCND1
ibrutinib		chemical drug				0.0134	HES1
HEXIM1		transcription regulator				0.0134	CCND1
XIAP		enzyme				0.0134	CCND1
P2RY2		G-protein coupled receptor				0.0134	CCND1
BTG2		transcription regulator				0.0134	CCND1
NFIC		transcription regulator				0.0134	CCND1
KN-62		chemical - kinase inhibitor				0.0134	CCND1
piceatannol		chemical - endogenous non-mammalian				0.0134	CCND1
biochanin A		chemical toxicant				0.0134	Sult1a1
UCN-01		chemical drug				0.0134	CCND1
CCND1	0.71	transcription regulator				0.0135	CCND1,SPP1
TGFB1		growth factor		1.292	bias	0.0139	APOE,CCND1,HES1,SPP1
POU5F1		transcription regulator				0.014	CCND1,SPP1
NfkB1-RelA		complex				0.014	CCND1
CDC73		other				0.014	CCND1
PSMD10		transcription regulator				0.014	CCND1
TAF4B		transcription regulator				0.014	SPP1
KAT2A		enzyme				0.014	CCND1
FGF9		growth factor				0.014	CCND1
HMGB2		transcription regulator				0.014	CCND1
K-252		chemical - kinase inhibitor				0.014	SPP1
calyculin A		chemical toxicant				0.014	CCND1
methyl-beta-cyclodextrin		chemical drug				0.014	CCND1
UTP		chemical - endogenous mammalian				0.0145	SPP1
p70 S6k		group				0.0145	CCND1
LIN28A		other				0.0145	CCND1
BMPR2		kinase				0.0145	SPP1
MAC		complex				0.0145	SPP1
PROCR		other				0.0145	CCND1
NOTCH4		transcription regulator				0.0145	HES1
BGN		other				0.0145	CCND1
DTX1		transcription regulator				0.0145	SPP1
CTSB		peptidase				0.0145	CCND1
SLC9A3		ion channel				0.0145	CCND1
CCR1		G-protein coupled receptor				0.0145	SPP1
ATOH1		transcription regulator				0.0145	HES1
BAG1		other				0.0145	CCND1
Mt1		other				0.0145	CCND1
AZGP1		transporter				0.0145	CCND1
ozone		chemical toxicant				0.0145	SPP1
progestin		chemical drug				0.0145	CCND1
CRYAB		other				0.015	CCND1
ADA		enzyme				0.015	SPP1
TAF6		transcription regulator				0.015	HES1
fludarabine		chemical drug				0.015	CCND1
CRTC2		other				0.0156	CCND1
GRP		growth factor				0.0156	CCND1
ACTL6A		other				0.0156	CCND1
DLL1		enzyme				0.0156	HES1
ROCK1		kinase				0.0156	CCND1
mir-135		microRNA				0.0156	SPP1
ASXL2		other				0.0156	Apoc1
SUB1		transcription regulator				0.0156	CCND1
HOXB13		transcription regulator				0.0156	CCND1
S100A6		transporter				0.0156	ADAMTS1
SP4		transcription regulator				0.0156	CCND1
PTCH1		transmembrane receptor				0.0156	CCND1
NPPA		other				0.0156	CCND1
PD 123319		chemical drug				0.0156	SPP1
methylnitronitrosoguanidine		chemical toxicant				0.0156	CCND1
letrozole		chemical drug				0.0156	CCND1
dicarbethoxydihydrocollidine		chemical toxicant				0.0156	SPP1
carbenoxolone		chemical toxicant				0.0156	SPP1
dichlorovinylcysteine		chemical toxicant				0.0156	CCND1
nitroarginine		chemical reagent				0.0156	SPP1
curcumin		chemical drug				0.0156	APOE,CCND1
RARA		ligand-dependent nuclear receptor				0.0159	CCND1,SPP1
CG		complex				0.016	ADAMTS1,SPP1
testosterone		chemical - endogenous mammalian				0.016	CCND1,OAT
prostaglandin D2		chemical - endogenous mammalian				0.0161	CCND1
LPIN1		phosphatase				0.0161	APOE
tosedostat		chemical drug				0.0161	CBS/CBSL
PRKCI		kinase				0.0161	CCND1
mir-23		microRNA				0.0161	SPP1
GNAI2		enzyme				0.0161	CCND1
ARRB1		other				0.0161	SPP1
urethane		chemical toxicant				0.0161	CCND1
dithiothreitol		chemical reagent				0.0161	CCND1
R-WIN 55,212		chemical reagent				0.0161	CCND1
bardoxolone methyl		chemical drug				0.0161	CCND1
caspase		group				0.0166	CCND1
NR2E1		ligand-dependent nuclear receptor				0.0166	CCND1
FGFR4		kinase				0.0166	CCND1
H2AZ1		other				0.0166	CCND1
SUMO1		enzyme				0.0166	CCND1
NGFR		transmembrane receptor				0.0166	CCND1
FECH		enzyme				0.0166	CCND1
ZBTB48		transcription regulator				0.0166	SPP1
VAV1		transcription regulator				0.0166	CCND1
WNT4		cytokine				0.0166	CCND1
PRKAR1A		kinase				0.0166	CCND1
IFRD1		other				0.0166	SPP1
KNG1		other				0.0166	CCND1
ACKR3		G-protein coupled receptor				0.0166	CCND1
ARID1A		transcription regulator				0.0166	HES1
KRT17		other				0.0166	SPP1
bufalin		chemical reagent				0.0166	CCND1
P38 MAPK		group				0.0169	CCND1,SPP1
grape seed extract		chemical drug				0.0172	CCND1
ALDH1A2		enzyme				0.0172	SPP1
PRKG1		kinase				0.0172	CCND1
miR-92a-3p (and other miRNAs w/seed AUUGCAC)		mature microRNA				0.0172	CCND1
PRKCZ		kinase				0.0172	CCND1
HOXC8		transcription regulator				0.0172	SPP1
NF2		other				0.0172	CCND1
KN 93		chemical - kinase inhibitor				0.0172	CCND1
vitamin A		chemical - endogenous mammalian				0.0172	OAT
betulinic acid		chemical drug				0.0172	CCND1
tetrachlorodibenzodioxin		chemical toxicant				0.0175	CCND1,HES1
prostaglandin J2		chemical - endogenous mammalian				0.0177	CCND1
Fgf		group				0.0177	CCND1
BMS-690514		chemical drug				0.0177	CCND1
NFATC4		transcription regulator				0.0177	SPP1
HLX		transcription regulator				0.0177	HES1
PDPK1		kinase				0.0177	CCND1
BECN1		other				0.0177	SPP1
UBE2I		enzyme				0.0177	CCND1
imipramine blue		chemical drug				0.0177	CCND1
eplerenone		chemical drug				0.0177	SPP1
troglitazone		chemical drug				0.0178	CCND1,SPP1
Calcineurin A		group				0.0182	CCND1
oleanolic acid		chemical - endogenous non-mammalian				0.0182	CCND1
Secretase gamma		complex				0.0182	HES1
SOX17		transcription regulator				0.0182	CCND1
ABCB4		transporter				0.0182	SPP1
EIF4EBP1		translation regulator				0.0182	CCND1
PLAT		peptidase				0.0182	CCND1
ELF4		transcription regulator				0.0182	SPP1
CDC42		enzyme				0.0182	CCND1
EWSR1		other				0.0182	CCND1
KIN001-043		chemical - kinase inhibitor				0.0182	CCND1
bardoxolone		chemical drug				0.0182	CCND1
fisetin		chemical toxicant				0.0182	CCND1
honokiol		chemical - endogenous non-mammalian				0.0182	CCND1
SKP2		other				0.0188	CCND1
APOB		transporter				0.0188	APOE
ING1		transcription regulator				0.0188	SPP1
CYP27B1		enzyme				0.0188	SPP1
diclofenac		chemical drug				0.0188	CCND1
SU6656		chemical toxicant				0.0188	CCND1
sodium orthovanadate		chemical reagent				0.0188	CCND1
choline		chemical - endogenous mammalian				0.0188	SPP1
TFDP1		transcription regulator				0.0193	CCND1
ETV4		transcription regulator				0.0193	SPP1
NCSTN		peptidase				0.0193	HES1
MMP2		peptidase				0.0193	CCND1
GAPDH		enzyme				0.0193	SPP1
mercuric chloride		chemical toxicant				0.0193	SPP1
FSH		complex				0.0193	ADAMTS1,CCND1
genistein		chemical drug				0.0194	CCND1,SPP1
SIRT1		transcription regulator				0.0197	Apoc1,CCND1
lipoxin A4		chemical - endogenous mammalian				0.0198	CCND1
KDM3A		transcription regulator				0.0198	CCND1
MEX3A		other				0.0198	CCND1
xanthohumol		chemical drug				0.0198	CCND1
XDH		enzyme				0.0198	SPP1
ALOX5		enzyme				0.0198	CCND1
PIAS1		transcription regulator				0.0198	CCND1
NDRG1		kinase				0.0198	CCND1
FOSB		transcription regulator				0.0198	CCND1
nafenopin		chemical drug				0.0198	CCND1
alvocidib		chemical drug				0.0198	CCND1
TP73		transcription regulator				0.0199	HES1,SPP1
CP-55940		chemical reagent				0.0204	ALDOC
rasagiline		chemical drug				0.0204	ALDOC
LHCGR		G-protein coupled receptor				0.0204	ADAMTS1
TWIST2		transcription regulator				0.0204	CCND1
NQO1		enzyme				0.0204	CCND1
SAA1		transporter				0.0204	CCND1
ADORA2B		G-protein coupled receptor				0.0204	SPP1
tempol		chemical drug				0.0204	SPP1
steroid		chemical - endogenous mammalian				0.0204	SPP1
INPP5D		phosphatase				0.0209	CCND1
PRKN		enzyme				0.0209	CCND1
sorafenib		chemical drug				0.0209	CCND1
fluvastatin		chemical drug				0.0209	CCND1
ethionine		chemical toxicant				0.0209	SPP1
sucrose		chemical - endogenous mammalian				0.0209	APOE
22(R)-hydroxycholesterol		chemical - endogenous mammalian				0.0209	APOE
CIITA		transcription regulator				0.0214	CCND1
EIF3E		other				0.0214	CCND1
ABL1		kinase				0.0214	CCND1
LG100268		chemical reagent				0.0214	APOE
4-methylnitrosoamino-1-(3-pyridinyl)-1-butanone		chemical toxicant				0.0214	SPP1
histone deacetylase		complex				0.0214	CCND1
CEBPB		transcription regulator				0.0216	CCND1,SPP1
conjugated linoleic acid		chemical drug				0.022	CBS/CBSL
LGR4		transmembrane receptor				0.022	OAT
PLAUR		transmembrane receptor				0.022	CCND1
HSPA9		other				0.022	HES1
F7		peptidase				0.022	CCND1
benzyl isothiocyanate		chemical - endogenous non-mammalian				0.022	CCND1
pentoxifylline		chemical drug				0.022	CCND1
DMP1		other				0.0225	SPP1
ASXL1		transcription regulator				0.0225	Apoc1
IRS2		enzyme				0.0225	CCND1
CD2		transmembrane receptor				0.0225	CCND1
PEBP1		other				0.0225	Apoc1
CSF1R		kinase				0.0225	CCND1
AGTR1		G-protein coupled receptor				0.0225	CCND1
PTPRC		phosphatase				0.0225	CCND1
ibuprofen		chemical drug				0.0225	CCND1
everolimus		chemical drug				0.0225	CCND1
phenacetin		chemical drug				0.0225	SPP1
SAHM1		chemical reagent				0.0225	HES1
NFKBIA		transcription regulator				0.0229	CCND1,HES1
IL15		cytokine				0.023	ALDOC,CCND1
Laminin (complex)		complex				0.023	CCND1
KL		enzyme				0.023	CCND1
pituitary adenylate cyclase-activating polypeptide		biologic drug				0.023	CCND1
SRSF2		transcription regulator				0.023	CCND1
RPS6KB1		kinase				0.0235	CCND1
HBEGF		growth factor				0.0235	CCND1
ILK		kinase				0.0235	CCND1
SST		other				0.0235	CCND1
NME1		kinase				0.0235	CCND1
advanced glycation end-products		chemical - endogenous mammalian				0.0235	SPP1
HNF4A		transcription regulator				0.0236	APOE,CBS/CBSL,CCND1,SPP1
CEBPA		transcription regulator				0.0239	CCND1,SPP1
DLL4		other				0.0241	HES1
A2M		transporter				0.0241	CCND1
PPP2CA		phosphatase				0.0241	CCND1
HDAC6		transcription regulator				0.0241	ADAMTS1
PCGF2		transcription regulator				0.0241	HES1
TXNIP		other				0.0241	CCND1
2-amino-1-methyl-6-phenylimidazo-4-5-b-pyridine		chemical toxicant				0.0241	CCND1
N-[N-(3,5-difluorophenacetyl-L-Ala)]-S-phenylglycine t-butyl ester		chemical - protease inhibitor				0.0241	HES1
VitaminD3-VDR-RXR		complex				0.0246	SPP1
STK40		kinase				0.0246	APOE
SMAD1		transcription regulator				0.0246	SPP1
CYP1A2		enzyme				0.0246	CCND1
MED13		transcription regulator				0.0246	Apoc1
PRKACA		kinase				0.0246	CCND1
L-triiodothyronine		chemical - endogenous mammalian				0.0248	CCND1,OAT
PPARA		ligand-dependent nuclear receptor				0.0249	APOE,CCND1
roscovitine		chemical drug				0.0251	CCND1
Hsp27		group				0.0251	CCND1
SATB2		transcription regulator				0.0251	SPP1
MEN1		transcription regulator				0.0251	CCND1
LRP6		transmembrane receptor				0.0251	CCND1
SPHK1		kinase				0.0251	CCND1
MTA1		transcription regulator				0.0251	CCND1
NOTCH2		transcription regulator				0.0251	HES1
ABCA1		transporter				0.0251	APOE
TCF7		transcription regulator				0.0251	SPP1
GSK2816126		chemical drug				0.0251	SPP1
SB 216763		chemical toxicant				0.0251	CCND1
SB203580		chemical - kinase inhibitor				0.0255	CCND1,SPP1
ITGB2		transmembrane receptor				0.0257	HES1
TOB1		transcription regulator				0.0257	CCND1
MYBL2		transcription regulator				0.0257	CCND1
ADRA1B		G-protein coupled receptor				0.0257	CCND1
AVP		other				0.0257	CCND1
PRKD1		kinase				0.0257	CCND1
OLR1		transmembrane receptor				0.0257	SPP1
herbimycin		chemical - kinase inhibitor				0.0257	CCND1
n-3 fatty acids		chemical drug				0.0257	CBS/CBSL
valsartan		chemical drug				0.0257	SPP1
baicalin		chemical - endogenous non-mammalian				0.0262	HES1
IL24		cytokine				0.0262	CCND1
RETN		other				0.0267	SPP1
valproic acid		chemical drug				0.0268	CCND1,SPP1
IGF1		growth factor				0.0272	CCND1,SPP1
deoxycholate		chemical - endogenous mammalian				0.0272	CCND1
ROCK2		kinase				0.0272	SPP1
TSC22D3		transcription regulator				0.0272	CCND1
NPY		other				0.0272	CBS/CBSL
BSG		transporter				0.0272	CCND1
TEAD2		transcription regulator				0.0272	CCND1
candesartan		chemical drug				0.0272	SPP1
9,10-dimethyl-1,2-benzanthracene		chemical toxicant				0.0272	CCND1
beta-naphthoflavone		chemical toxicant				0.0272	APOE
PRMT1		enzyme				0.0278	CCND1
CDX1		transcription regulator				0.0278	CCND1
ADRB2		G-protein coupled receptor				0.0278	SPP1
MTORC1		complex				0.0283	CCND1
SFRP1		transmembrane receptor				0.0283	CCND1
EIF2S1		translation regulator				0.0283	CCND1
IGFBP2		other				0.0283	CCND1
NOG		growth factor				0.0283	SPP1
SMYD1		transcription regulator				0.0283	OAT
ADM		other				0.0283	SPP1
L-methionine		chemical - endogenous mammalian				0.0288	SPP1
ZEB2		transcription regulator				0.0288	CCND1
MAP3K1		kinase				0.0288	CCND1
salirasib		chemical drug				0.0288	ALDOC
DETA-NONOate		chemical reagent				0.0288	CCND1
Am 580		chemical toxicant				0.0288	HES1
iron		chemical - endogenous mammalian				0.0288	CCND1
E2F1		transcription regulator				0.029	CCND1,HES1
leukotriene D4		chemical - endogenous mammalian				0.0294	ADAMTS1
WWTR1		transcription regulator				0.0294	SPP1
ICAM1		transmembrane receptor				0.0294	HES1
FOSL2		transcription regulator				0.0294	SPP1
anisomycin		chemical - endogenous non-mammalian				0.0294	SPP1
carboplatin		chemical drug				0.0294	SPP1
3-methylcholanthrene		chemical toxicant				0.0294	CCND1
Vegf		group				0.0297	ADAMTS1,HES1
ACSL4		enzyme				0.0299	SPP1
PTPN6		phosphatase				0.0299	CCND1
CYP1B1		enzyme				0.0299	CCND1
hydrogen peroxide		chemical - endogenous mammalian				0.0302	CCND1,SPP1
S-nitroso-N-acetyl-DL-penicillamine		chemical reagent				0.0304	SPP1
NCOR2		transcription regulator				0.0304	CCND1
hexachlorobenzene		chemical toxicant				0.0304	SPP1
GNAS		enzyme				0.0304	SPP1
SERPINF1		other				0.0304	CCND1
PAX5		transcription regulator				0.0304	CCND1
MAP2K7		kinase				0.0304	CCND1
MSC		transcription regulator				0.0304	SPP1
luteolin		chemical drug				0.0304	CCND1
MAP2K4		kinase				0.0309	CCND1
THPO		cytokine				0.0309	CCND1
GPER1		G-protein coupled receptor				0.0309	CCND1
APOA1		transporter				0.0309	APOE
POU2AF1		transcription regulator				0.0309	SPP1
Gcg		other				0.0309	OAT
IL11		cytokine				0.0315	SPP1
PRKCB		kinase				0.0315	CCND1
KLF5		transcription regulator				0.0315	CCND1
CSF2		cytokine				0.0319	CCND1,SPP1
NOTCH3		transcription regulator				0.032	HES1
CXCR4		G-protein coupled receptor				0.032	CCND1
cadmium chloride		chemical toxicant				0.032	CCND1
ursolic acid		chemical drug				0.032	CCND1
capsaicin		chemical drug				0.032	CCND1
ELK1		transcription regulator				0.0325	SPP1
GW 4064		chemical toxicant				0.0325	APOE
mitomycin C		chemical drug				0.0325	CCND1
U0126		chemical - kinase inhibitor				0.0329	CCND1,SPP1
FLI1		transcription regulator				0.033	CCND1
TYROBP		transmembrane receptor				0.033	SPP1
BCL3		transcription regulator				0.0336	CCND1
IL6ST		transmembrane receptor				0.0336	CCND1
NRIP1		transcription regulator				0.0336	CCND1
rotenone		chemical toxicant				0.0336	CCND1
NR4A3		ligand-dependent nuclear receptor				0.0341	CCND1
miR-17-5p (and other miRNAs w/seed AAAGUGC)		mature microRNA				0.0341	CCND1
GPS2		transcription regulator				0.0341	CCND1
SNAI2		transcription regulator				0.0341	CCND1
PLN		transporter				0.0341	HES1
Sn50 peptide		chemical toxicant				0.0341	APOE
ursodeoxycholic acid		chemical - endogenous mammalian				0.0346	SPP1
PDGFB		growth factor				0.0346	SPP1
NRG2		growth factor				0.0346	HES1
gemcitabine		chemical drug				0.0346	CCND1
azoxymethane		chemical toxicant				0.0346	CCND1
oxaliplatin		chemical drug				0.0346	CCND1
lomustine		chemical drug				0.0346	SPP1
sulindac		chemical drug				0.0346	CCND1
Go 6976		chemical - kinase inhibitor				0.0346	CCND1
TSH		complex				0.0351	CCND1
EGLN1		enzyme				0.0351	HES1
MUC1		other				0.0351	CCND1
hydroxyurea		chemical drug				0.0351	CCND1
Ngf		group				0.0351	CCND1
vitamin E		chemical drug				0.0357	SPP1
POLR2A		enzyme				0.0357	CCND1
PKM		kinase				0.0357	CCND1
DKK1		growth factor				0.0357	CCND1
GHRL		growth factor				0.0357	SPP1
birabresib		chemical drug				0.0357	ADAMTS1
levothyroxine		chemical - endogenous mammalian				0.0357	APOE
glutathione		chemical - endogenous mammalian				0.0357	CCND1
Pro-inflammatory Cytokine		group				0.0362	APOE
mir-15		microRNA				0.0362	CCND1
TNFSF13B		cytokine				0.0362	SPP1
calphostin C		chemical - kinase inhibitor				0.0362	CCND1
3,3'-diindolylmethane		chemical drug				0.0362	CCND1
Raf		group				0.0367	CCND1
PLAU		peptidase				0.0367	CCND1
SMARCA2		transcription regulator				0.0367	HES1
TBX21		transcription regulator				0.0367	SPP1
FASN		enzyme				0.0367	Apoc1
PD98059		chemical - kinase inhibitor				0.0368	CCND1,SPP1
CREB1		transcription regulator				0.037	APOE,CCND1
MAVS		other				0.0372	SPP1
TEAD1		transcription regulator				0.0372	CCND1
FOS		transcription regulator				0.0375	CCND1,SPP1
CDK4/6		group				0.0377	CCND1
DDX58		enzyme				0.0377	SPP1
GLI3		transcription regulator				0.0377	CCND1
ID1		transcription regulator				0.0377	CCND1
GDNF		growth factor				0.0377	CCND1
RC3H1		enzyme				0.0377	SPP1
sulindac sulfide		chemical drug				0.0377	CCND1
entinostat		chemical drug				0.0377	CCND1
ESRRG		ligand-dependent nuclear receptor				0.0383	ALDOC
KDM3B		enzyme				0.0383	ADAMTS1
GNA14		enzyme				0.0383	ADAMTS1
RXRB		ligand-dependent nuclear receptor				0.0383	SPP1
PPARGC1B		transcription regulator				0.0383	CCND1
ATM		kinase				0.0383	CCND1
ETS2		transcription regulator				0.0383	SPP1
FGF7		growth factor				0.0383	CCND1
CISH		other				0.0383	SPP1
MEF2D		transcription regulator				0.0383	CCND1
silibinin		chemical drug				0.0383	CCND1
Calcineurin protein(s)		complex				0.0388	SPP1
mir-34		microRNA				0.0388	CCND1
PIK3CA		kinase				0.0388	CCND1
AGER		transmembrane receptor				0.0388	CCND1
SOX1		transcription regulator				0.0388	HES1
E2F2		transcription regulator				0.0388	CCND1
tyrphostin AG 1478		chemical - kinase inhibitor				0.0388	CCND1
RNF31		enzyme				0.0393	CCND1
miR-199a-5p (and other miRNAs w/seed CCAGUGU)		mature microRNA				0.0393	PIGR
IFNG		cytokine				0.0394	CCND1,PIGR,SPP1
PTTG1		transcription regulator				0.0398	CCND1
RELB		transcription regulator				0.0398	CCND1
cyclophosphamide		chemical drug				0.0398	SPP1
cadmium		chemical toxicant				0.0398	CCND1
Il3		cytokine				0.0403	SPP1
Bay 11-7082		chemical - kinase inhibitor				0.0403	CCND1
Notch		group				0.0409	HES1
CYP19A1		enzyme				0.0409	CCND1
MAP2K6		kinase				0.0409	CCND1
FOSL1		transcription regulator				0.0409	CCND1
epinephrine		chemical - endogenous mammalian				0.0409	CCND1
PRKCE		kinase				0.0414	CCND1
MDM2		transcription regulator				0.0414	CCND1
IFI16		transcription regulator				0.0414	CCND1
ROR2		kinase				0.0414	CCND1
GCG		other				0.0414	CBS/CBSL
captopril		chemical drug				0.0414	SPP1
rottlerin		chemical toxicant				0.0414	CCND1
PD173074		chemical reagent				0.0419	CCND1
MAP2K1/2		group				0.0419	CCND1
MMP9		peptidase				0.0419	CCND1
C3		peptidase				0.0419	APOE
PTPN11		phosphatase				0.0419	CCND1
NFKB2		transcription regulator				0.0419	CCND1
SREBF2		transcription regulator				0.0419	ALDOC
(+)-MK-801		chemical drug				0.0419	CCND1
PLX5622		chemical drug				0.0419	SPP1
fenretinide		chemical drug				0.0419	CCND1
ascorbic acid		chemical - endogenous mammalian				0.0419	SPP1
romidepsin		biologic drug				0.0419	CCND1
HDAC5		transcription regulator				0.0424	HES1
EWSR1-FLI1		fusion gene/product				0.0424	CCND1
N-Ac-Leu-Leu-norleucinal		chemical - protease inhibitor				0.0424	CCND1
Rb		group				0.043	CCND1
mir-17		microRNA				0.043	CCND1
PPP3CA		phosphatase				0.043	SPP1
apigenin		chemical - endogenous non-mammalian				0.043	CCND1
dehydroisoandrosterone		chemical - endogenous mammalian				0.043	CCND1
FFAR3		G-protein coupled receptor				0.0435	CBS/CBSL
TGFA		growth factor				0.0435	CCND1
ZBTB17		transcription regulator				0.0435	CCND1
sodium chloride		chemical - endogenous mammalian				0.0435	SPP1
PP2/AG1879 tyrosine kinase inhibitor		chemical - kinase inhibitor				0.044	SPP1
cobalt chloride		chemical reagent				0.044	ADAMTS1
AICAR		chemical - endogenous mammalian				0.044	CCND1
SMARCA4		transcription regulator				0.0444	CCND1,SPP1
SCAP		other				0.0445	ALDOC
CDH1		other				0.0445	CCND1
FBXO32		enzyme				0.0445	OAT
SPIB		transcription regulator				0.0445	APOE
zinc		chemical drug				0.0445	CCND1
IL2		cytokine				0.0446	CCND1,SPP1
SMO		G-protein coupled receptor				0.045	CCND1
maslinic acid		chemical - endogenous non-mammalian				0.0455	CCND1
NPC1		transporter				0.0455	CCND1
PIK3R1		kinase				0.0455	CCND1
CCN1		other				0.0455	CCND1
homocysteine		chemical - endogenous mammalian				0.0455	CCND1
SSB		enzyme				0.0461	CCND1
ERBB4		kinase				0.0461	CCND1
NFYA		transcription regulator				0.0461	CBS/CBSL
NR0B2		ligand-dependent nuclear receptor				0.0461	SPP1
chenodeoxycholic acid		chemical - endogenous mammalian				0.0466	APOE
SBDS		other				0.0466	SPP1
AREG		growth factor				0.0466	CCND1
CBFB		transcription regulator				0.0466	SPP1
miR-29b-3p (and other miRNAs w/seed AGCACCA)		mature microRNA				0.0466	CCND1
mir-29		microRNA				0.0466	CCND1
LCN2		transporter				0.0466	SPP1
TGFBR1		kinase				0.0466	CCND1
COL18A1		other				0.0471	CCND1
4-phenylbutyric acid		chemical - endogenous mammalian				0.0471	CCND1
nocodazole		chemical reagent				0.0471	CCND1
ZFHX3		transcription regulator				0.0476	CCND1
RHOA		enzyme				0.0476	CCND1
GDF2		growth factor				0.0481	SPP1
ZFP36		transcription regulator				0.0481	SPP1
CCL2		cytokine				0.0481	CCND1
miR-291a-3p (and other miRNAs w/seed AAGUGCU)		mature microRNA				0.0481	CCND1
R5020		chemical reagent				0.0481	CCND1
TCF		group				0.0481	CCND1
SLC13A1		transporter				0.0487	SPP1
ADAM10		peptidase				0.0487	CCND1
sphingosine-1-phosphate		chemical - endogenous mammalian				0.0487	CCND1
BCR-ABL1		fusion gene/product				0.0487	CCND1
AG490		chemical - kinase inhibitor				0.0492	SPP1
elaidic acid		chemical - endogenous mammalian				0.0492	APOE
PDLIM2		other				0.0497	CCND1
Ifnar		group				0.0497	SPP1
SOCS3		phosphatase				0.0497	CCND1
FOLR1		transporter				0.0497	ALDOC
GPD1		enzyme				0.0497	CCND1
ATF2		transcription regulator				0.0497	CCND1

## Sheet: DBA+ duct cluster 3 vs all
© 2000-2020 QIAGEN. All rights reserved.
Upstream Regulator	Expr Log Ratio	Molecule Type	Predicted Activation State	Activation z-score	Flags	p-value of overlap	Target Molecules in Dataset	Mechanistic Network
NEDD9		other	Inhibited	-2.828		5.06e-14	ANKRD37,ARMC4,Ccdc30,DNALI1,DYNLRB2,FHAD1,FOS,FOXJ1,KIF9,NAAA,NEK5,RPGR,RSPH4A,SPA17,TF,TPPP3,TUBA1A,TXNIP
ULK4	0.039	kinase		-1.897	bias	1.59e-12	DNAH9,FOXJ1,LGALS3BP,ODF2,PCM1,RSPH4A,RSPH9,TMEM67,TTLL6,VANGL1
CDK19		kinase	Inhibited	-2.728	bias	3.77e-08	BAIAP2,BAX,CCND2,CCNG1,CDKN1A,EPHX1,HSPA4L,IER5,ITGB4,MDM2,MXD4,RPS27L,TXNIP
CHEK2		kinase	Activated	2.186	bias	3.07e-07	BAX,CCNG1,CDKN1A,MDM2,OCLN,TP53BP2	96 (9)
doxifluridine		chemical drug	Activated	2.384	bias	4.67e-07	BAX,CCNG1,CDKN1A,MDM2,RPS27L,TP53INP1
NAP1L1		other				5.59e-07	ALB,FOXA2,HNF4A,IGFBP5,TTR
SLC29A1		transporter	Activated	2.433	bias	9.9e-07	BAX,CCNG1,CDKN1A,MDM2,RPS27L,TP53INP1
TSC2		other	Inhibited	-2.95	bias	1.43e-06	BAX,CCND2,CCND3,CDKN1A,CRIP1,ENPP2,FOS,IFITM3,IGFBP5,LGALS3,Mt1,NFE2L1,UCP2	115 (12)
cadmium chloride		chemical toxicant		0.705	bias	1.84e-06	ALB,CXCL12,FOS,GCLC,HSP90AA1,Mt1,Mt2,OCLN,TXN	128 (8)
FOXA2	0.417	transcription regulator	Activated	2.262	bias	2.09e-06	ALB,CEBPA,CFAP126,CPM,DYNLRB2,EPHX1,FOXA2,HNF4A,HPGD,IGFBP5,MLF1,Mt1,PIFO,RARA,TF,TTR,UCP2	71 (7)
nitric oxide		chemical - endogenous mammalian		1.931	bias	2.35e-06	BAX,CCNG1,CDKN1A,CTSH,CXCL12,DUSP6,FOS,GCLC,HSP90AA1,MDM2,Mt1,Mt2,ODC1,PRDX5	118 (13)
TP53INP1	0.259	other		1.987	bias	4.27e-06	BAX,CDKN1A,MDM2,TP53INP1	95 (7)
TP53		transcription regulator	Activated	3.889		4.33e-06	ACSL3,ALB,ALDOA,ARHGAP1,ARHGAP5,ATP1A1,ATXN1,BAX,BOK,C9orf116,CCND2,CCND3,CCNG1,CDC42EP3,CDKN1A,CEBPA,CERS6,CHUK,Crip2,CTSH,CXCL12,DAPK1,DDIT4L,DDR1,DDX5,DEK,DICER1,DUSP6,EIF4G3,ENPP2,EPHX1,ETFA,EZR,FOS,FOXA2,GAS6,GSTM5,HSP90AA1,HSPA4L,HSPH1,IDH3G,IER5,IGFBP5,ITGB4,LGALS3,Ly6a (includes others),MDM2,MEF2A,Mt2,NUPR1,PDLIM5,PEG3,PLXNB2,POLK,PPP3CA,PRKCZ,PTTG1,RPS27L,RUVBL2,TCEA3,TNFAIP8,TOB1,TP53BP…	115 (15)
N-ethyl-N-nitrosourea		chemical toxicant				6.16e-06	BAX,CDKN1A,HSP90AA1,Mt1,Mt2
CX3CR1		G-protein coupled receptor		1.941	bias	6.28e-06	ARL13B,CCDC39,CEP83,DYNC2H1,ERICH5,FOS,GAS8,GSTO1,PACRG,RFX3,RPGR,TF,ULK4,WDR78
GAS2L3		other	Inhibited	-2.219	bias	8.82e-06	CCND2,CCNG1,CDKN1A,EPHX1,TM4SF1
PGR		ligand-dependent nuclear receptor	Activated	3.21	bias	9.13e-06	AKAP13,ATXN1,CCND3,CDKN1A,CEBPA,DYNLL1,EIF1AX,EP400,EZR,FOS,GAS6,HPGD,HSPA2,IGFBP5,ITGB4,NT5C2,TM4SF1,WNT4	171 (20)
FOXO3		transcription regulator	Activated	2.471		9.3e-06	Acot1,BAX,CCND2,CCND3,CDC42EP3,CDKN1A,FBXO32,FOS,GCLC,GSTM5,Mt1,Mt2,MXD4,NUPR1,PRDX5,PTTG1,RUVBL1,TP53INP1,TXNIP,UCP2	108 (11)
cisplatin		chemical drug	Activated	2.138	bias	1.04e-05	ALB,ASCC1,ATXN1,BAX,C9orf116,CCNG1,CDKN1A,CEBPA,DICER1,DNAH5,DUSP6,ENDOG,ESYT2,FOS,HSPA4L,IER5,ITGB4,LGALS3,LMNA,MDM2,MLF1,Mt1,MXD4,OCLN,ODC1,PLXNB2,RPS27L,TNFAIP8,TOB1,TP53INP1,TXNIP,UCP2,USP2,WNT4	125 (15)
MDM4		transcription regulator	Inhibited	-2.158	bias	1.68e-05	BAX,CDKN1A,ITGB4,LGALS3,MDM2	101 (9)
nitrofurantoin		chemical drug		0.359		1.79e-05	ALB,AMBP,BAX,CCNG1,HNF4A,ITGB4,LGALS3,Mt1,ODC1,SELENBP1,TTR,TUBA1A,TXN
H2AZ1		other				2.22e-05	ALB,CDKN1A,FOXA2,HNF4A,IGFBP5,TTR
idarubicin		chemical drug	Activated	2.219	bias	2.24e-05	BAX,CDKN1A,MDM2,TP53BP2,TP53INP1	95 (7)
MTPN	0.414	transcription regulator	Activated	2.97	bias	2.52e-05	BAX,Calm1 (includes others),CCND2,CCND3,CEBPA,FOS,GAS6,Mt1,TUBA1A	85 (4)
dihydrotestosterone		chemical - endogenous mammalian		1.817	bias	2.67e-05	ACSL3,ADIPOR2,ALDOA,ATP2A2,BAX,CCND2,CCND3,CDKN1A,CEBPA,DDX5,DYNLL1,FBXO32,FOS,Foxp1,GAS6,HPGD,HSP90AA1,IGFBP5,IQGAP2,MAK,MDM2,Mt1,ODC1,RASSF9,SELENBP1,TF,WNT4	172 (18)
TOPORS		enzyme				2.67e-05	BAX,CDKN1A,MDM2
LETMD1		other				2.67e-05	BAX,CDKN1A,MDM2
RRM2B		enzyme				2.67e-05	BAX,CDKN1A,TP53INP1	82 (6)
dexamethasone		chemical drug		0.847		2.72e-05	ACSL3,AEBP1,AKAP13,ALB,ATP11A,ATP1A1,ATP2A2,BAX,BCLAF1,Calm1 (includes others),CCND2,CCND3,CDC42EP3,CDH4,CDKN1A,CEBPA,CRIP1,CXCL12,CYP2S1,DALRD3,DAPK1,DZIP1L,EIF1AX,EIF4G3,ETFA,EZR,FBXO32,FOS,FOXJ1,FURIN,GAS6,GCC2,GCLC,GOLIM4,GSTM5,HPGD,HSPH1,IDS,IFITM3,IGFBP5,IRF2BP2,LGALS3,LGALS3BP,Ly6a (includes others),LYN,MEF2A,MID1IP1,MPC1,Mt1,Mt2,NAGA,NFE2L1,NME5,OCLN,ODC1,PNRC2,PRPF4B,RABGAP1L,RARA,SELENB…	149 (17)
ESR1		ligand-dependent nuclear receptor	Activated	2.668		2.93e-05	AKAP13,ARHGAP1,ARHGAP18,ATP11A,BAX,BCLAF1,CALML4,CCND3,CCNG1,CDC42EP3,CDKN1A,CEBPA,CLDN2,CLIC6,CPM,CXCL12,DSG2,ENPP2,EPHX4,FOS,HSP90AA1,HSPA2,HSPH1,IFITM3,IGFBP5,LGALS3BP,MAN1A1,MDM2,MPC1,MR1,NEK1,ODF3B,PCM1,PDLIM5,PTTG1,RARA,SLC39A4,SMAD5,TAX1BP1,TM4SF1,TOB1,TTR,TXNIP,UBXN10,UGT2B7,USP19,VEZF1,WNT4,ZNF703	148 (16)
STAT5B		transcription regulator		0.737		3.66e-05	Acot1,ALDH3A2,ASAP1,ATP2A2,BAIAP2,BAX,C2orf50,CCND2,CCND3,CDKN1A,DAPK1,FOS,KIF9,MDM2,RUVBL2,SPAG16,TF	114 (12)
methylprednisolone		chemical drug		1.542		3.68e-05	ALDH3A2,ATP1A1,ATP2A2,BAIAP2,Calm1 (includes others),CCNG1,CDKN1A,CTSH,DUSP6,DYNLL1,ENPP2,EPHX1,FBXO32,FOS,FOXA2,GCLC,HSPH1,Ly6a (includes others),Mt1,NUDT4,ODC1,RUVBL1,TOB1,Uox,USP2	79 (7)
bromobenzene		chemical toxicant				5.3e-05	CDKN1A,FOS,GCLC,HSP90AA1,Mt1,Mt2,OXCT1,TUBA1A
mercuric chloride		chemical toxicant				5.41e-05	CDKN1A,GCLC,HSP90AA1,Mt1,Mt2,TXN
TP63		transcription regulator	Activated	2.301	bias	5.65e-05	B9D1,BAX,BOK,CCND2,CCND3,CCNG1,CDKN1A,CEBPA,CTXN1,DICER1,DUSP6,FOS,FOXA2,FSD1L,IFT22,IFT57,IFT74,ITGB4,LYN,MDM2,PRKCZ,TNFAIP8,WNT4	114 (13)
CDKN2A		transcription regulator		0.419		5.85e-05	APPL2,BAX,CCND3,CCNG1,CDKN1A,DDR1,DDX5,DEK,FOS,IGFBP5,LGALS3,MDM2,ODC1,PEG3,POLK,TOB1,TP53INP1	100 (12)
BRD7		transcription regulator		1.956	bias	6.09e-05	BAX,CCNG1,CDKN1A,DICER1,MDM2	104 (10)
MELK		kinase				6.59e-05	BAX,CDKN1A,MDM2
FT671		chemical - protease inhibitor				6.59e-05	CDKN1A,MDM2,RPS27L
AG490		chemical - kinase inhibitor	Inhibited	-2.724	bias	6.89e-05	BAX,CCND3,CDKN1A,ENPP2,FOS,HPGD,LYN,OCLN,PTTG1	115 (13)
cadmium		chemical toxicant		1.039	bias	8.73e-05	ALB,ATP1A1,BAX,CDKN1A,EPHX1,LGALS3,Mt1,Mt2	101 (8)
PTPN11		phosphatase		0.147		0.000126	ATP2A2,BAX,CCNG1,CDKN1A,CEBPA,FOS,MDM2,MXD4	114 (14)
Tcf 1/3/4		group				0.00013	ALB,AMBP,TTR
USP11		peptidase				0.00013	BAX,CDKN1A,CHUK	83 (8)
HNF4A	0.048	transcription regulator		1.94		0.000133	Acot1,AKAP13,ALB,AMBP,B9D2,BCLAF1,BOLA1,BPHL,C11orf1,C22orf23,CALML4,CCNG1,CDC14A,CDC42EP3,CDKN1A,CEBPA,CEP83,CFAP20,CLDN2,CRIP1,CRY1,DUSP6,EPHX1,FAM216A,FOXA2,FURIN,GOLIM4,GSTO1,GSTZ1,HNF4A,HSPA4L,HSPH1,IER5,IFT122,KIF9,LGALS3,MCEE,MDM2,MID1IP1,Mt1,Mt2,NAGA,NFE2L1,OCLN,PALMD,PRDX5,PRKCZ,PTGES3,RARA,RBM39,RSPH4A,RUVBL2,SLC39A9,SPATA6,TAX1BP1,TF,TM4SF4,TTC25,TTR,TXN,TXNIP,UCP2,USP2,WNT4,ZNHIT1
pituitary adenylate cyclase-activating polypeptide		biologic drug				0.000151	BAMBI,CCND2,CCND3,DUSP6,MACROD1,WNT4
beta-estradiol		chemical - endogenous mammalian	Activated	3.048	bias	0.000152	Acot1,AEBP1,AGR3,Akap9,ALB,ALDOA,BAMBI,BAX,C9orf24,CCND2,CCND3,CCNG1,CDKN1A,CEBPA,CHUK,CPM,CTSH,CXCL12,DDR1,DSP,DUSP6,DYNLL1,EML2,ENPP2,FOS,GCLC,HPGD,HSPA2,HSPH1,IFT122,IGFBP5,LGALS3,LGALS3BP,LMNA,LMO7,MAK,MDM2,MEF2A,MEIS2,MPC1,MXD4,MYCBP,NUPR1,OCLN,ODC1,ODF3B,OXCT1,PNRC2,PPP3CA,PRKCZ,PTTG1,RARA,RBM39,SELENBP1,SNED1,SYNE1,TF,TM4SF1,TP53INP1,TTR,TUBB4B,TXN,TXNIP,USP19,WNT4	192 (20)
arsenic		chemical toxicant		1.98	bias	0.000165	BAX,FOS,GCLC,HSP90AA1,Mt1	109 (11)
IGF1		growth factor	Activated	2.404	bias	0.000168	BAX,CCND2,CCND3,CCNG1,CDKN1A,DDX5,DUSP6,EIF1AX,FBXO32,FOS,IFITM3,IGFBP5,Ly6a (includes others),MDM2,NUPR1,OCLN,ODC1,PDXK,PPP3CA,TF,TXNIP,WNT4	154 (16)
KAT5		transcription regulator				0.000176	ALB,BAX,CCND2,CDKN1A,FOXA2,HNF4A,IGFBP5,PALMD,TTR	102 (9)
dimethylnitrosamine		chemical toxicant		1.982	bias	0.000196	Calm1 (includes others),CDKN1A,IGFBP5,Mt1,Mt2,PRKCZ
JUN		transcription regulator		1.648	bias	0.000206	BAX,CCND2,CCND3,CDKN1A,CLDN2,Crip2,DICER1,DUSP6,EZR,FOS,FOXA2,GAS6,GCLC,HPGD,ITGB4,LGALS3,LMNA,MDM2,RARA,TF,TXN,WNT4	126 (16)
forskolin		chemical toxicant		1.568	bias	0.000207	AKAP13,ALDOA,ARHGAP1,B4GALT1,BAMBI,CCND2,CCND3,CDKN1A,Crip2,DAPK1,DICER1,DUSP6,EZR,FOS,GSTM5,HPGD,HSPA2,IGFBP5,MACROD1,MDM2,Mt1,Mt2,ODC1,PDXK,TM4SF1,TUBA1A,TXNIP,UCP2,WNT4	127 (16)
mir-449		microRNA				0.000224	DNAH6,SCLT1,TUBB4B
SUPT5H		transcription regulator				0.000224	ANKRD37,CDKN1A,MEIS2
methotrexate		chemical drug		1.066		0.000253	ADIPOR2,ALB,ALDOA,CCNG1,CDKN1A,CLDN2,CXCL12,IGFBP5,MDM2,Mt1,OCLN,TOB1,TP53INP1,TTR	107 (10)
CASR		G-protein coupled receptor		1.897	bias	0.000293	BAX,CCND2,CCND3,IGFBP5,NUPR1,ODC1,PTTG1,TXN,TXNIP,UCP2	98 (7)
EGF		growth factor	Activated	2.437	bias	0.000313	ATP2A2,B4GALT1,CCND2,CCND3,CDH4,CDKN1A,CLDN2,DDX5,DUSP6,EZR,FOS,FOXA2,FOXJ1,GRB7,HNF4A,HPGD,IDS,IGFBP5,NFE2L1,OCLN,ODC1,PTTG1,TF	133 (16)
glycine		chemical - endogenous mammalian		1.982		0.000316	ALB,CDKN1A,FOS,ODC1	89 (7)
FOS	0.233	transcription regulator		0.485	bias	0.00032	ASAP1,ATXN2,B4GALT1,CCNG1,CLDN2,CTSH,EZR,FOS,HIPK3,HPGD,IGFBP5,ITGB4,LGALS3,LGALS3BP,MDM2,Mt2,ODC1,PRPF4B,PTTG1,RARA,SELENBP1,SMAD5,TXN,WNT4	97 (6)
methapyrilene		chemical drug		-0.378		0.000329	ALB,ALDOA,AMBP,CCNG1,ENPP2,GCLC,Mt1,ODC1,PPP3CA,TTR
Ins1		other		1.56	bias	0.000334	Acot1,ADIPOR2,ALB,ATP1A1,CCND3,CDKN1A,CEBPA,DYNLL1,FOS,FOXA2,IGFBP5,LGALS3BP,Marcks,Mt1,ODC1,TF	124 (15)
doxorubicin		chemical drug		0.283	bias	0.000341	ALB,ATP2A2,BAX,C9orf116,CDKN1A,CHCHD6,FOS,GCLC,HSPH1,ITGB4,LGALS3,LGALS3BP,MDM2,ODC1,PTTG1,RBM39,TP53BP2,TP53INP1,TXN,WNT4	118 (14)
AURK		group	Inhibited	-2.433	bias	0.000353	BAX,CDKN1A,HSPA4L,MDM2,TCEA3,WDR63
ANLN		other	Inhibited	-2.449	bias	0.000353	BAX,CDKN1A,HSPA4L,MDM2,TCEA3,WDR63
GCS-100		chemical drug				0.000354	CCND2,CDKN1A,LGALS3
evofosfamide		chemical drug				0.000354	CCND2,CCND3,CDKN1A
MTBP		other				0.000354	CCND2,CDKN1A,ODC1
ethyl 2-{[(6,7-dimethyl-3-oxo-1,2,3,4-tetrahydro-2-quinoxalinyl)acetyl]amino}-4,5-dimethyl-3-thiophenecarboxylate		chemical reagent				0.000354	BAX,CDKN1A,MDM2
N-methyl-3,4-methylenedioxyamphetamine		chemical drug				0.000354	FOS,Mt1,Mt2
USP42		peptidase				0.000359	CDKN1A,MDM2
MAGEA2/MAGEA2B		other				0.000359	BAX,CDKN1A
SALL2		transcription regulator				0.000359	BAX,CDKN1A
teleocidins		chemical toxicant				0.000359	FOS,ODC1
pirinixic acid		chemical toxicant	Activated	2.697	bias	0.000372	AADAC,Acot1,ADIPOR2,ALDH3A2,ATP11A,BAX,CCND3,CDKN1A,CXCL12,DYNLL1,ENDOG,FURIN,HNF4A,HSP90AA1,IFITM3,LGALS3,PCM1,TXN,UCP2,Uox	113 (12)
ITGA6		transmembrane receptor		1.94	bias	0.000395	BAX,CCND2,ENPP2,ITGB4
MNT		transcription regulator				0.000395	CCND2,FBXO32,ODC1,TXNIP
HIPK2		kinase		0.328	bias	0.000429	CCND2,CDKN1A,GCLC,GSTM5,ITGB4,LGALS3,MDM2	104 (11)
paraquat		chemical toxicant		1.2	bias	0.00045	BAX,C9orf116,CEP290,GCLC,MAPK15,Mt1,Mt2,STRBP,TXN
ACOX1		enzyme		-1.897		0.000461	CDKN1A,CXCL12,LGALS3,LGALS3BP,NUPR1,PALMD,SELENBP1,TM4SF4,UCP2,Uox	44 (4)
CYB5R4		enzyme		-1.977	bias	0.000486	ACSL3,GCLC,Mt1,Mt2
RFX3	0.055	transcription regulator				0.000486	DNAH11,DNAH9,DNALI1,FOXJ1
TP53COR1		other		1.98	bias	0.000486	BAX,HIPK1,MDM2,TP53INP1	66 (3)
HNF1B		transcription regulator				0.000508	ALB,AMBP,FOXA2,HNF4A,IFT88,KIFAP3,OCLN,TM4SF4,TTR
FGF2		growth factor	Activated	3.498	bias	0.000522	ALB,BAMBI,BAX,CCND2,CCND3,CDKN1A,CXCL12,DUSP6,ENPP2,FOS,IGFBP5,LMNA,MACROD1,MDM2,ODC1,Ptma (includes others),PTTG1,TF,WNT4	126 (17)
geneticin		chemical toxicant				0.000523	BAX,CDKN1A,MDM2
iron		chemical - endogenous mammalian		0.492		0.000538	CCND2,CCND3,CDKN1A,CEBPA,Mt1,TF	73 (8)
Growth hormone		group	Activated	2.316	bias	0.000542	ALB,BPHL,CCND2,CEBPA,DDR1,FOS,FOXA2,GCLC,GSTM5,IGFBP5,TF,TUBA1A,TXNIP	122 (15)
mir-25		microRNA	Inhibited	-2.209	bias	0.000557	BAX,CDKN1A,HIPK3,MDM2,TOB1	117 (13)
CSF3		cytokine		0.637	bias	0.000561	BAX,CCND2,CCND3,CEBPA,CXCL12,DUSP6,ENPP2,FOS,Ly6a (includes others),ODC1,RARA	117 (16)
AXIN1		other		-0.152	bias	0.000592	CCND2,CEBPA,FOS,MDM2	95 (7)
PIM1		kinase		1.782	bias	0.000595	ATP2A2,CCND2,CCND3,CDKN1A,IGFBP5,MDM2	112 (15)
HRAS		enzyme		1.02	bias	0.000618	ASAP1,ATP2A2,ATXN1,BAX,BOK,CCND2,CCND3,CCNG1,CDKN1A,Crip2,CXCL12,DUSP6,EIF4G3,EPHX1,FOS,FURIN,GAS6,HSP90AA1,IGFBP5,IQGAP2,ITGB4,MAN1A1,MDM2,OXCT1,PDLIM5,SBF2	154 (19)
1,2-dithiol-3-thione		chemical reagent	Activated	2.37	bias	0.000654	ALDOA,ATP1A1,DYNLL1,EPHX1,GCLC,GSTM5,HSP90AA1,LMNA,RUVBL1,TTR,TXN,Uox	18 (2)
RXRA		ligand-dependent nuclear receptor		1.751		0.000683	Acot1,ACSL3,CCND3,CDKN1A,CEBPA,CLMN,CTSH,EPHX1,FOS,GAS6,GCLC,HNF4A,MID1IP1,RARA,TXN	124 (11)
calcitriol		chemical drug		0.097		0.00069	ALB,BAX,CCND3,CDKN1A,CEBPA,CXCL12,DICER1,FOS,FOXA2,HPGD,IGFBP5,Ly6a (includes others),MRPS6,NUPR1,OCLN,ODC1,OXCT1,PALMD,PRDX5,TF,TXN,TXNIP,UCP2	165 (17)
CEBPB		transcription regulator		1.782	bias	0.000691	ALB,B9D1,CCND2,CDC42EP3,CDKN1A,CEBPA,DAPK1,DDX5,FBXO32,FOS,HSP90AA1,IFITM3,LYN,NFE2L1,NUPR1,ODC1,TF,TIMP4,TM4SF1	114 (11)
JAK2		kinase	Activated	2.179	bias	0.000701	BAX,CCND2,CDKN1A,ENPP2,FOS,LYN,ODC1,RARA,TF,TP53INP1	115 (13)
TRPC1		ion channel		0	bias	0.000712	BAX,CCND2,CCND3,CDKN1A
CAMK2N2		other				0.000737	BAX,CDKN1A,MDM2	88 (6)
Shc		group				0.000737	CCND2,CCND3,FOS	122 (12)
COPS8		other				0.000737	CCND2,CCND3,CDKN1A
2-hydroxy-1-naphthylaldehyde isonicotinoyl hydrazone		chemical reagent				0.000737	CCND2,CCND3,CDKN1A
estrogen receptor		group		0.277		0.000743	BAX,CCND2,CDH4,CXCL12,DICER1,DSP,FOS,HSP90AA1,LYN,MAN1A1,MMP15,OCLN,TIMP4	154 (10)
AHR		ligand-dependent nuclear receptor		-0.113		0.000746	ADIPOR2,ALB,BAX,CCND3,CDKN1A,CEBPA,CYP2S1,DUSP6,EPB41L5,FOS,GAS6,GSTM5,HSP90AA1,HSPH1,Mt1,Mt2,TXN	109 (10)
THPO		cytokine		0.744	bias	0.000792	BAX,CCND2,CCND3,CEBPA,FOS,MDM2	118 (14)
TFAP4		transcription regulator		-0.447		0.000812	CDKN1A,FOS,MDM2,MLF1,OCLN
FGF4		growth factor				0.00085	CDKN1A,FOS,FOXA2,PTTG1	107 (10)
pifithrin alpha		chemical reagent		-1.951	bias	0.00085	BAX,CCNG1,CDKN1A,MDM2	110 (10)
epicatechin gallate		chemical drug				0.00085	CCNG1,CDKN1A,LYN,MDM2	103 (11)
IL3		cytokine		1.806	bias	0.0009	Calm1 (includes others),CCND2,CCND3,CCNG1,CDKN1A,EIF1AX,FOS,HNF4A,HSPA2,LYN,MDM2,Mt1,ODC1,SMAD5,TAX1BP1,UCP2	116 (13)
mir-17		microRNA	Inhibited	-2.561	bias	0.000942	CDKN1A,GCLC,MDM2,TAX1BP1,TP53INP1,TXNIP,USP2
WNT1		cytokine		1.432	bias	0.000952	CCND2,CCND3,CCNG1,CDKN1A,CEBPA,EIF1AX,ENPP2,FOS,HNF4A	101 (10)
TRIM25		transcription regulator				0.000999	BAX,CDKN1A,MDM2
HIPK1	0.307	kinase				0.000999	GCLC,GSTM5,MDM2
MYZAP		other				0.000999	ATP2A2,DSP,FOS	41 (6)
UBR5		enzyme				0.000999	BAX,CDKN1A,MDM2	23 (3)
meloxicam		chemical drug				0.000999	CDKN1A,HPGD,Pde4d	86 (5)
RACK1		enzyme		-0.187		0.001	BAX,CDKN1A,FOS,MDM2	119 (15)
mitomycin C		chemical drug	Activated	2.374	bias	0.00104	BAX,CDKN1A,IRF2BP2,MDM2,PEG3,TP53INP1	104 (10)
CD38		enzyme	Activated	3.162	bias	0.00104	ALDOA,CCND2,CRELD2,CRIP1,DRC1,ENDOG,EVI5,LGALS3,LMO7,PPP3CA
BCL2		transporter		-0.552	bias	0.00106	ATP2A2,BAX,CCNG1,CDKN1A,CTSH,FOS,GCLC,MDM2	117 (12)
ZNF346		other				0.00106	BAX,CDKN1A
RHOBTB2		enzyme				0.00106	CDKN1A,MSI2
RFFL		enzyme				0.00106	CDKN1A,MDM2
TTC5		other				0.00106	BAX,CDKN1A
PYHIN1		other				0.00106	CDKN1A,MDM2
ATP1A2		transporter				0.00106	ATP1A1,FOS
RNF144B		enzyme				0.00106	BAX,CDKN1A	83 (5)
ELL		transcription regulator				0.00106	CDKN1A,FOS
PSMC5		transcription regulator				0.00106	CCND2,LYN
HTR6		G-protein coupled receptor				0.00106	IFT88,KIF3A
AP2A2		transporter				0.00106	BAX,CDKN1A
HES6		transcription regulator				0.00106	CDKN1A,HNF4A
(+)-R-3-(4-chlorophenyl)-3-(1-hydroxymethylcyclopropylmethoxy)-2-(4-nitrobenzyl)-2,3-dihydroisoindol-1-one		chemical reagent				0.00106	CDKN1A,MDM2
UIMC1		other				0.00106	BAX,CDKN1A
ofloxacin		chemical drug				0.00106	BAX,CDKN1A
Insulin		group		1.348	bias	0.00108	ADIPOR2,AEBP1,ALB,ALDOA,CCND3,CDKN1A,CEBPA,ENPP2,ETFA,FBXO32,FOS,GCLC,HSP90AA1,LGALS3BP,NFE2L1,OCLN,ODC1,PRKCZ,UCP2,WNT4	135 (18)
SMARCA4		transcription regulator	Activated	2.42	bias	0.00111	ALB,ASCC1,BAMBI,CDKN1A,CPM,CTSH,DUSP6,FOS,FOXA2,GCLC,GSTO1,HNF4A,HPGD,IFITM3,IGFBP5,KIFAP3,LGALS3,LMNA,Mt1,MXD4,OXCT1,RAMP1,TNFAIP8,TTR
UBE3A		enzyme				0.00118	CDKN1A,MDM2,TP53INP1,WNT4
OSM		cytokine		0.729	bias	0.00124	AADAC,ACSL3,ALB,BAIAP2,BAMBI,CCND2,CDKN1A,CEBPA,CPM,CRY1,CTSH,CXCL12,DAPK1,FOS,HIPK3,HSPA2,Mt2,PDLIM5,SMAD5,SYNE1,TM4SF1,TUBA1A	127 (10)
diethylnitrosamine		chemical toxicant		-1.937		0.00127	ALB,CDKN1A,CXCL12,HNF4A,Mt1,Mt2,SELENBP1,TM4SF4
IKBKG		kinase	Activated	2.376	bias	0.0013	AEBP1,ATP2A2,BAX,CXCL12,DUSP6,ENPP2,FOS,Mt1,Mt2	117 (12)
PRKAG3		other				0.00131	DDIT4L,IGFBP5,MID1IP1,ODC1,OXCT1,PEG3,POLK,RAMP1,TPPP3,WNT4
zinostatin		biologic drug				0.00131	BAX,CDKN1A,MDM2	83 (7)
AGN194204		chemical drug	Activated	2.18	bias	0.00134	Acot1,ANXA11,ATP1A1,CDKN1A,CEBPA,Crip2,FOXA2,Foxp1,FURIN,IFITM3,LMNA,MAN1A1
PHF1		transcription regulator		1.96	bias	0.00137	BAX,CCNG1,CDKN1A,MDM2	95 (7)
Trp53cor1		other		1.969	bias	0.00137	BAX,CDKN1A,FOXA2,MDM2	95 (7)
FGF9		growth factor				0.00137	BAX,CCND3,GCLC,WNT4
arotinoid acid		chemical toxicant		0.254	bias	0.00137	CDKN1A,FOS,ODC1,RARA	74 (7)
methyl methanesulfonate		chemical toxicant	Activated	2.19	bias	0.00142	CCNG1,CDKN1A,MDM2,PLXNB2,TP53INP1	95 (7)
PI3K (family)		group		1.012	bias	0.00142	CCND3,CLDN2,CXCL12,FBXO32,FOS,GCLC,PRKCZ,TXNIP	150 (15)
SNAI2		transcription regulator		-1.387		0.00145	CDKN1A,CXCL12,DSP,HPGD,ITGB4,OCLN
U0126		chemical - kinase inhibitor	Inhibited	-3.615	bias	0.00154	BAX,CCND2,CCND3,CDC42EP3,CDKN1A,CEBPA,CLDN2,CRY2,CXCL12,DUSP6,EIF1AX,ENPP2,FOS,FURIN,GCLC,HPGD,IFT88,MDM2,OCLN,TF,TXN	130 (17)
miR-122-5p (miRNAs w/seed GGAGUGU)		mature microRNA	Inhibited	-2.394	bias	0.00157	ALDOA,ANXA11,ATP11A,CCNG1,CERS6,Foxp1
methylmercury		chemical toxicant		1.633		0.00157	ARHGAP18,BAX,CCNG1,MDM2,Mt1,TXNIP
palmitic acid		chemical - endogenous mammalian		1.354	bias	0.00162	ADIPOR2,ALDOA,BAX,CDKN1A,FBXO32,FOS,GCLC,HNF4A,Mt1,Mt2,TXNIP,UCP2	120 (16)
EPO		cytokine		1.805	bias	0.00162	BAX,CCND2,CCND3,CDKN1A,CXCL12,DALRD3,FOS,GCC2,MID1IP1,NUPR1,PRKCZ,TF,TXNIP,UCP2	119 (13)
BDNF		growth factor		-0.126	bias	0.00166	ARVCF,ATP2A2,CCND2,CDKN1A,DUSP6,FOS,HSPA2,HSPA4L,MACROD1,PALMD,PDLIM5,PLXNB2,PRKCZ,TUBA1A,TXNIP	82 (9)
TLE1		transcription regulator				0.00168	FOS,MEIS2,NUPR1
TRRAP		transcription regulator				0.00168	CCND2,CDKN1A,MDM2	92 (8)
Sos		group				0.00172	ASAP1,B4GALT1,CCNG1,FOS,HIPK3,IGFBP5,LGALS3BP,Mt2,ODC1,PRPF4B,PTTG1
N-acetylsphingosine		chemical reagent		1.069	bias	0.00174	BAX,CDKN1A,FOS,GSTM5,RARA	116 (14)
GnRH analog		biologic drug		1.069		0.00181	ANXA11,ARHGAP1,DYNLL1,EML2,FOS,GSTO1,HSPA2,LRRC23,MLF1,PDLIM5,PSMC3IP,RARA,RPGR,SMAD5,TUBA1A
GW9662		chemical reagent		-1.219	bias	0.00185	BAX,CDKN1A,CEBPA,FOS,FOXA2,MID1IP1,UCP2	39 (4)
streptozocin		chemical drug		0.258		0.00187	ADIPOR2,ALB,ALDH3A2,ATP1A1,BAX,CCND3,CEBPA,FBXO32,FOS,HNF4A,LGALS3,TXNIP	134 (18)
NFE2L2		transcription regulator	Activated	3.06	bias	0.00191	ALDOA,ATP1A1,Calm1 (includes others),CDKN1A,CEBPA,DYNLL1,EPHX1,GCLC,GSTM5,GSTO1,HSP90AA1,LMNA,Mt1,NFE2L1,RUVBL1,TTR,TXN,Uox	39 (3)
TCF7		transcription regulator				0.00191	CEBPA,FOS,FOXA2,HNF4A,RARA
CD 437		chemical drug		-0.606	bias	0.00194	ALDOA,BAX,CDKN1A,FOS,HSP90AA1,INO80B,KIF3A,ODC1,TOMM7,TUBA1A,TXN	104 (9)
PTP4A1		phosphatase		1	bias	0.00197	ALDOA,BAX,CDPF1,DDX5,HNF4A,ITGB4,RUVBL1,RUVBL2
lipopolysaccharide		chemical drug		1.017	bias	0.00206	Acot1,AKAP13,ALB,ARHGAP1,ARVCF,ASAP1,ATP1A1,ATP2A2,BAMBI,BAX,Calm1 (includes others),CCND2,CCND3,CDC42EP3,CDKN1A,CEBPA,CHUK,CRELD2,CXCL12,DICER1,ENPP2,Erdr1,FBXO32,FOS,FOXA2,Foxp1,FURIN,GCLC,HNF4A,HPGD,HSPA4L,IGFBP5,LGALS3,LGALS3BP,Ly6a (includes others),LYN,Marcks,Mt1,Mt2,MXD4,NUPR1,OCLN,ODC1,OXCT1,PRDX5,PRKCZ,RALGDS,RARA,TF,TIMP4,TP53BP2,TUBB4B,TXN,TXNIP,UCP2,VEZF1	176 (17)
ACTL6A		other		-1		0.00208	CCND2,CCNG1,CDKN1A,TP53INP1
miR-26a-5p (and other miRNAs w/seed UCAAGUA)		mature microRNA		-1.922	bias	0.00208	CCND2,CCND3,CDKN1A,HPGD
methylnitronitrosoguanidine		chemical toxicant		1.953	bias	0.00208	BAX,CDKN1A,CEBPA,MDM2	98 (11)
hydrogen peroxide		chemical - endogenous mammalian	Activated	3.504	bias	0.00209	AEBP1,BAX,CCND3,CDKN1A,ENPP2,EZR,FBXO32,FOS,GCLC,IER5,KCNQ1OT1,MDM2,NEK1,ODC1,RAB36,TP53INP1,TXN,TXNIP,UCP2,WNT4	115 (15)
SNHG1		other				0.0021	BAX,CDKN1A
tozasertib		chemical drug				0.0021	BAX,CDKN1A	89 (8)
GNL3L		other				0.0021	BAX,CDKN1A
UTP3		other				0.0021	CCND2,CCND3
TEX11		other				0.0021	BAX,FOS
USP24		peptidase				0.0021	BAX,PTTG1
MUCL1		other				0.0021	CCND3,CDKN1A	97 (7)
Sapk		group				0.0021	FBXO32,FOS
asparagine		chemical - endogenous mammalian				0.0021	ALB,ODC1
CALCR		G-protein coupled receptor				0.0021	CDKN1A,FOS
SSTR3		G-protein coupled receptor				0.0021	IFT88,KIF3A
ZKSCAN3		transcription regulator				0.0021	CCND2,ITGB4
NOC2L		transcription regulator				0.0021	BAX,CDKN1A
benfur		chemical reagent				0.0021	CDKN1A,MDM2
NFKBIA		transcription regulator		-0.037	bias	0.00211	AEBP1,ATP11A,BAX,BOK,CCND2,CDKN1A,CXCL12,DUSP6,ENPP2,FOS,GSTM5,MDM2,MMP15,MR1,Mt1,Mt2,MXD4,TNFAIP8	123 (16)
ID4		transcription regulator				0.00211	BAX,CDKN1A,CEBPA
pyruvic acid		chemical - endogenous mammalian				0.00211	ALDOA,BAX,FOS	91 (10)
spermidine		chemical - endogenous mammalian				0.00211	CDKN1A,FOS,ODC1
actinomycin D		biologic drug		0.648	bias	0.00222	ALB,ATP1A1,BAX,CDKN1A,CERS6,FOS,GSTM5,IGFBP5,MDM2,Mt1,TF,TP53BP2	109 (14)
N-acetyl-L-cysteine		chemical drug	Inhibited	-2.389	bias	0.00222	ATP1A1,BAX,CCND2,CDKN1A,CXCL12,DICER1,DUSP6,FBXO32,FOS,GCLC,TXN,TXNIP	114 (16)
GSK3B		kinase	Inhibited	-2.37		0.00231	ATP2A2,BAX,CDKN1A,FOS,IFT27,IFT88,KIF3A,TRAF3IP1	111 (15)
progesterone		chemical - endogenous mammalian		1.886		0.00236	Acot1,AEBP1,BAX,CCND3,CCNG1,CDKN1A,CXCL12,DICER1,ENPP2,EP400,EZR,FOS,GAS6,HSPA2,IGFBP5,LGALS3,LMO7,MDM2,NT5C2,OCLN,PEG3,TTR,WNT4	149 (16)
PRKDC		kinase				0.00237	CDKN1A,ITGB4,MDM2,PTTG1	111 (12)
TOPBP1		other				0.0026	BAX,CDKN1A,MDM2	83 (7)
LGALS3	0.094	other				0.00265	BAX,CDKN1A,CTSH,DUSP6,ENPP2,IGFBP5,PRKCZ	110 (13)
caspase		group		1.964	bias	0.00268	BAX,CCND2,CCND3,CDKN1A	106 (11)
MYOG		transcription regulator		1.131	bias	0.00268	CCND3,CDKN1A,FBXO32,FOS
MECOM		transcription regulator		1.067	bias	0.00268	CDKN1A,CEBPA,ITGB4,Ly6a (includes others)
gentamicin		chemical drug		1.325		0.00272	ACSL3,BAX,CCNG1,ENPP2,GSTM5,HNF4A,HSP90AA1,MDM2,NUDC,RPS27L,RUVBL1,TTR
NR4A1		ligand-dependent nuclear receptor		0.19		0.00274	ADIPOR2,ALDOA,CCND2,CEBPA,CXCL12,DAPK1,GSTM5,ITGB4,Ly6a (includes others),MDM2,Mt1,OCLN,UCP2	112 (12)
beta-naphthoflavone		chemical toxicant		1.103	bias	0.00275	BAX,CYP2S1,FOS,GCLC,GSTM5	85 (5)
FGF1		growth factor	Activated	2.327		0.00282	ALB,CDKN1A,DUSP6,FOS,GCLC,GSTM5,ODC1,TTR	116 (15)
SNAI1		transcription regulator		-1.998		0.00288	CCND2,CCND3,CDH4,CDKN1A,FOS,HNF4A,HPGD,OCLN,TF	110 (7)
miR-92a-3p (and other miRNAs w/seed AUUGCAC)		mature microRNA		-1.98	bias	0.00302	CCND2,CDKN1A,CEBPA,HIPK3
PTGS2		enzyme		0.235	bias	0.00302	BAX,CDKN1A,CXCL12,DYNLL1,EZR,FOS,ITGB4,Pde4d,PRKCZ,SSBP4	128 (16)
SOX4		transcription regulator		0.673	bias	0.00313	Acot1,BAX,CLIC6,DICER1,FOS,GRB7,LMO7,Ly6a (includes others),Mt1,TUBA1A
MKNK1		kinase	Activated	2.646	bias	0.00314	ARVCF,FOS,HSPA2,HSPA4L,PDLIM5,PLXNB2,TXNIP
AQP1		transporter				0.00316	HSPA4L,HSPH1,NUPR1
Il3		cytokine	Activated	2.181	bias	0.00322	CCND2,CCND3,CDKN1A,FOS,Ly6a (includes others),MDM2	127 (15)
carbon tetrachloride		chemical toxicant		1.178	bias	0.00323	BAX,Calm1 (includes others),CDKN1A,FOS,GCLC,HSP90AA1,IGFBP5,Mt1,Mt2,ODC1,TF	121 (14)
L-triiodothyronine		chemical - endogenous mammalian		1.385	bias	0.0033	ALB,ATP1A1,ATP2A2,BAX,CDKN1A,CEBPA,CEP126,CTSH,CXCL12,ENPP2,FOS,LMNA,ODC1,PRKCZ,PTTG1,RARA,TF,UCP2	122 (15)
BMS-690514		chemical drug		-1	bias	0.00338	CCND3,CTSH,HSP90AA1,HSPH1
honokiol		chemical - endogenous non-mammalian				0.00338	BAX,CCND2,CDKN1A,FOS	63 (5)
PPARA		ligand-dependent nuclear receptor		0.961	bias	0.00345	AADAC,Acot1,ALDH3A2,BAX,CDKN1A,CEBPA,CXCL12,DYNLL1,ENDOG,FOS,GSTZ1,HNF4A,IFITM3,IGFBP5,OCLN,SELENBP1,TXN,UCP2	88 (11)
C9orf116	0.03	other				0.00346	CDKN1A,MDM2
acyline		biologic drug				0.00346	BAX,OCLN
BCAS2		other				0.00346	CDKN1A,MDM2
7S NGF		complex				0.00346	FOS,GCLC
LUCAT1		other				0.00346	BAX,CDKN1A
RNF34		enzyme				0.00346	CDKN1A,MDM2
PPP1R13B		phosphatase				0.00346	BAX,CDKN1A
UTS2		other				0.00346	FOS,HPGD
BRCA2		transcription regulator				0.00346	BAX,CDKN1A
PLIN2		other				0.00346	Acot1,UCP2	38 (4)
RSU1		other				0.00346	ARHGAP5,CDKN1A
MYC		transcription regulator	Activated	2.474	bias	0.00348	ALB,ALDOA,BAX,CCND2,CCND3,CDKN1A,CEBPA,CRIP1,Crip2,DDX5,DEK,DSP,DUSP6,EZR,FBXO32,FOS,FOXA2,GCLC,HSP90AA1,HSPH1,IER5,IQGAP2,Ly6a (includes others),MDM2,Mt1,Mt2,NUDC,ODC1,PEG3,RARA,RPS27L,RUVBL1,RUVBL2,TF,TOB1,TXN,TXNIP	113 (13)
MMP1		peptidase	Activated	2.219	bias	0.00354	BAX,CDKN1A,CXCL12,FOS,MDM2
FGFR2		kinase		1.998	bias	0.00375	BAX,CCND2,CDKN1A,CLIC6,CTSH,FOXA2,PLXNB2,TTR	26 (3)
KITLG		growth factor		1.441	bias	0.00375	CCND3,CDKN1A,CEBPA,CXCL12,DALRD3,FOS,GAS6,GCC2,MID1IP1,PTGES3,TXNIP,UCP2	123 (15)
green tea polyphenol		chemical drug				0.00378	BAX,CDKN1A,CHUK,FOS	95 (7)
bardoxolone		chemical drug		1.982	bias	0.00378	CDKN1A,CEBPA,EPHX1,GCLC
NEDD4		enzyme				0.00378	CDKN1A,DUSP6,MDM2	88 (6)
nimodipine		chemical drug				0.00378	BAX,FOS,ODC1	87 (5)
CDK9		kinase				0.00383	ANKRD37,CCND2,CDKN1A,FOS,ODC1
PSEN1		peptidase		-0.734		0.00393	ALB,ALDOA,ATP2A2,BAX,C11orf1,CUEDC1,ENPP2,Erdr1,FOS,HSP90AA1,NUPR1,PRDX5,RPGR,TUBA1A,TUBB4B,TXN	110 (9)
VCAN		other		-1.667		0.00403	AEBP1,Calm1 (includes others),CDKN1A,CXCL12,ENPP2,LGALS3,MDM2,PRDX5,WNT4
BIRC5		other		0.941	bias	0.00414	BAX,CDKN1A,CHUK,MDM2,PTTG1	107 (13)
TERC		other				0.0042	CDKN1A,CRY1,Erdr1,NUPR1
ING1		transcription regulator		1.044		0.0042	BAX,CDKN1A,DEK,MDM2	95 (7)
USF1		transcription regulator				0.00441	BAX,CEBPA,FBXO32,Mt1,TXNIP,UCP2
apigenin		chemical - endogenous non-mammalian				0.00441	BAX,CCND2,CDKN1A,FOS,GCLC,MDM2	161 (18)
CG		complex	Activated	2.204	bias	0.00442	BAX,CCND2,CCND3,CDKN1A,CEBPA,DNAH11,DUSP6,ENPP2,FOS,HPGD,LGALS3BP,MRPS6,TIMP4,TM4SF1,WNT4	165 (18)
S100B		other				0.00448	CDKN1A,FOS,MDM2	105 (11)
magnolol		chemical - endogenous non-mammalian				0.00448	BAX,CDKN1A,FOS
phorbol 12,13-dibutyrate		chemical - endogenous non-mammalian		1.057	bias	0.00466	CCND2,CDKN1A,FOS,MDM2	107 (8)
AKT1		kinase		1.763	bias	0.00478	BAX,CCND2,CCND3,CDKN1A,EZR,FBXO32,FOS,GCLC,GSTM5,HIPK3,IGFBP5,MDM2,RAMP1	110 (13)
trichloroethylene		chemical toxicant		1.342		0.00482	ARHGAP18,CCNG1,GSTO1,MDM2,TXNIP
benzene		chemical toxicant		1.406		0.00482	ARHGAP18,CCNG1,CDKN1A,MDM2,TXNIP
2,5-bis(5-hydroxymethyl-2-thienyl)furan		chemical reagent				0.00512	CDKN1A,MDM2
RASSF3		other				0.00512	BAX,CDKN1A
AMER1		other				0.00512	BAX,CDKN1A
nomilin		chemical - endogenous non-mammalian				0.00512	BAX,CDKN1A
BCL2L12		other				0.00512	CCNG1,CDKN1A
EIF5A		translation regulator				0.00512	BAX,CDKN1A
DYNLL1	0.619	other				0.00512	CDKN1A,FOS	83 (4)
TFF2		other				0.00512	CCND2,CCND3
SMARCD1		transcription regulator				0.00512	BAX,CDKN1A
chlorambucil		chemical drug				0.00512	BAX,DEK
PK11007		chemical reagent				0.00512	CDKN1A,MDM2
Z-VEID-FMK		chemical reagent				0.00512	CCND2,CCND3
mir-22		microRNA				0.00514	CCND3,CDKN1A,MYCBP,TP53INP1
CTBP1		enzyme				0.00514	CDKN1A,ENPP2,FOS,OCLN
histone deacetylase inhibitor		chemical drug		1.091	bias	0.00514	BAX,CDKN1A,DEK,TXNIP
Srebp		group				0.00524	CDKN1A,FOS,UCP2
Gli		group				0.00524	CCND2,FOXA2,ITGB4
CCNH		transcription regulator				0.00524	CDKN1A,MEIS2,UCP2	64 (5)
lycopene		chemical drug				0.00524	BAX,CCND3,CDKN1A	75 (7)
levodopa		chemical - endogenous mammalian	Activated	2.747		0.00524	ATP2A2,ATXN1,BAX,C9orf24,CDC42EP3,CLIC6,CMTM8,CRY2,CTXN1,CXCL12,DDIT4L,DUSP6,FOS,Foxp1,GOLIM4,IGFBP5,KIAA0556,LMNA,MEIS2,PSMC3IP,RAMP1,SPAG6,SYNE1
phenobarbital		chemical drug	Activated	2.38	bias	0.00527	CDKN1A,EPHX1,GSTM5,HNF4A,MDM2,VEZF1
HTT		transcription regulator				0.00528	ALDOA,ATP1A1,ATP2A2,BAIAP2,CALML4,CDKN1A,CEBPA,CHUK,CLIC6,DUSP6,ENPP2,FOS,Foxp1,GCLC,IGFBP5,MAN1A1,Marcks,MEIS2,Mt1,PDXK,PPP3CA,RARA,TM4SF1,USP2	93 (10)
WT1		transcription regulator		-0.068		0.00546	ANXA11,CDKN1A,ETFA,EZR,LGALS3,MDM2,ODC1,Ptma (includes others),RARA,TM4SF1,WNT4	72 (7)
PTH		other		1.913	bias	0.00549	ATP2A2,CDKN1A,CXCL12,FOS,GOLGB1,IGFBP5,LMNA,ODC1,WNT4	153 (13)
raloxifene		chemical drug		-1		0.00549	CDKN1A,CTSH,CXCL12,DYNLL1,ENPP2,MXD4,PTTG1,SELENBP1,TM4SF1	118 (7)
RNF2		transcription regulator		-1.387	bias	0.00557	CCND2,CDC14A,CDKN1A,FOXA2,HNF4A
ALKBH5		enzyme				0.00558	AKAP13,EIF4G3,GSTM5,RARA,RPGR,SMAD5
NQO1		enzyme		0		0.00566	BAX,CDKN1A,CEBPA,CXCL12	109 (10)
PIK3R1		kinase		1.671	bias	0.00591	ATP1A1,CCND2,CXCL12,FOS,NFE2L1,TXNIP	115 (9)
KLF4		transcription regulator		0.78	bias	0.00594	ALB,ATP2A2,BAX,CCND2,CDKN1A,CEBPA,DSP,IER5,IFITM3,MSI2,ODC1,PEG3,TF	104 (9)
TO-901317		chemical reagent	Activated	2.353	bias	0.00599	Acot1,ADIPOR2,ALB,ALDH3A2,EPHX1,GSTM5,LGALS3,MID1IP1,Mt1,Mt2,RARA	70 (8)
Z-LLL-CHO		chemical - protease inhibitor	Activated	3.209	bias	0.00605	ATP1A1,BAX,CCND2,CCND3,CCNG1,CDKN1A,CEBPA,CHUK,FOS,HSP90AA1,OCLN,ODC1,TP53BP2,TXN	113 (16)
MLX		transcription regulator				0.00608	LGALS3BP,MID1IP1,TXNIP
KLF10		transcription regulator				0.00608	BAX,CDKN1A,CEBPA	83 (7)
PPP1R13L		transcription regulator				0.00608	CCND2,CDKN1A,DSP
RFX1		transcription regulator				0.00608	IFT88,KIF3A,LMNA
CCND3	0.232	kinase				0.00608	CCND2,CCND3,CEBPA
leptomycin B		chemical drug				0.00608	CDKN1A,CEBPA,MDM2	100 (8)
CARM1		transcription regulator				0.00622	CDKN1A,FOS,GCLC,HSP90AA1	99 (6)
sulforafan		chemical drug		1.71		0.0063	BAX,CDKN1A,EPHX1,FOS,GCLC,GSTM5,Mt1,TAX1BP1	111 (11)
5-fluorouracil		chemical drug		0.648		0.00635	ALDOA,BAIAP2,BAX,CCND2,CCNG1,CDKN1A,HSPA4L,IER5,ITGB4,MDM2,MXD4,PTGES3,RPS27L,TXNIP	116 (14)
ERBB3		kinase		1		0.00639	BAX,CCND2,CDKN1A,CXCL12,EZR,GAS6,IGFBP5	82 (8)
INSR		kinase		1.387	bias	0.00668	ADIPOR2,ALB,Calm1 (includes others),CCND2,CDKN1A,CEBPA,CRY1,DEK,ETFA,FOS,FURIN,GRB7,KIFAP3,MDM2,RUVBL2,UCP2	122 (15)
arsenite		chemical toxicant	Activated	2	bias	0.00669	CDKN1A,FOS,GCLC,GSTM5,HSPA4L,MDM2,Mt2	119 (14)
ATP7B		transporter	Inhibited	-2		0.00681	CCNG1,Mt1,Mt2,PTTG1
maneb		chemical toxicant		0	bias	0.00685	BAX,C9orf116,CEP290,MAPK15,STRBP
sodium arsenite		chemical drug		1.452	bias	0.00685	BAX,CDKN1A,CEBPA,FOS,GCLC	165 (20)
IL10RA		transmembrane receptor	Activated	2.883		0.00695	AADAC,BAX,CLIC6,CYP2S1,GAS6,GSTM5,HPGD,Ly6a (includes others),OCLN,SELENBP1,ST3GAL6,TTLL6,TTR
MAX		transcription regulator		-1.982		0.00697	BAX,CCND2,CDKN1A,FBXO32,ODC1,TXNIP
MAT1A		enzyme				0.00699	ALB,BAX,Mt1
miR-23a-3p (and other miRNAs w/seed UCACAUU)		mature microRNA				0.00699	CXCL12,FBXO32,SMAD5
ADRB3		G-protein coupled receptor				0.00699	CXCL12,FOS,UCP2
NR6A1		ligand-dependent nuclear receptor				0.00699	CCND3,FOXA2,LMNA
PD 169316		chemical - kinase inhibitor				0.00699	CCND2,CCND3,CDKN1A	123 (14)
Zn2+		chemical - endogenous mammalian				0.00699	FOS,Mt1,Mt2	114 (11)
L-proline		chemical - endogenous mammalian				0.00708	ALB,CDKN1A
C1orf61		other				0.00708	CCND3,OCLN
MED28		other				0.00708	AEBP1,CRIP1
valine		chemical - endogenous mammalian				0.00708	ALB,CDKN1A
BANP		other				0.00708	BAX,CDKN1A
E4F1		transcription regulator				0.00708	IDS,MPC1
MYCBP	0.301	transcription regulator				0.00708	CCND2,ODC1
FKBP1A		enzyme				0.00708	CDKN1A,MDM2	86 (6)
OXTR		G-protein coupled receptor				0.00708	FOS,PRKCZ
DMTF1		transcription regulator				0.00708	CDKN1A,MDM2
glyceraldehyde-BSA		chemical reagent				0.00708	CDKN1A,CEBPA
methylglyoxal-BSA		chemical reagent				0.00708	CDKN1A,CEBPA
FOXN3		transcription regulator				0.00708	CFAP36,IFT81
diquat		chemical toxicant				0.00708	Mt1,Mt2
4-coumaric acid		chemical - endogenous mammalian				0.00708	CDKN1A,ODC1
leucovorin		chemical - endogenous mammalian				0.00708	CCND3,CDKN1A
NR4A3		ligand-dependent nuclear receptor				0.00732	BAX,CCND2,CEBPA,FOXA2,UCP2
miR-17-5p (and other miRNAs w/seed AAAGUGC)		mature microRNA	Inhibited	-2.168	bias	0.00732	BAMBI,CCND2,CDKN1A,HIPK3,TXNIP
RCE1		peptidase				0.00743	AEBP1,CRIP1,CXCL12,LMNA
HSPA9		other		0.577	bias	0.00743	CDKN1A,CLMN,MDM2,TIMP4
eflornithine		chemical drug		1.124		0.00743	CDKN1A,LGALS3,LGALS3BP,ODC1	122 (7)
TGFB1		growth factor		1.157	bias	0.00761	Acot1,ACSL3,ALB,ALDH3A2,ALDOA,ANXA11,ATXN1,BAMBI,BAX,Calm1 (includes others),CALML4,CCND2,CCND3,CDC42EP3,CDH4,CDKN1A,CEBPA,CTSH,CXCL12,DAPK1,DDX5,DSG2,DSP,DYNLL1,FOS,FOXA2,FOXJ1,FURIN,GCLC,HNF4A,HPGD,HSP90AA1,IGFBP5,LGALS3,Ly6a (includes others),MDM2,MRPS6,MXD4,NUPR1,OCLN,PDLIM5,PDXK,RARA,SELENBP1,ST3GAL6,TTLL3,TUBA1A,TUBB4B,TXNIP,WNT4	193 (17)
CHUK	0.118	kinase	Activated	2.562	bias	0.00773	AEBP1,CDKN1A,CHUK,CXCL12,DUSP6,ENPP2,FOS,HSP90AA1,Mt1,Mt2	97 (7)
nocodazole		chemical reagent		1.173		0.00774	CDKN1A,CHUK,FOS,MDM2,PRKCZ,PTTG1	124 (15)
IL2RA		transmembrane receptor				0.00799	CCND2,CCND3,FOS
everolimus		chemical drug				0.00809	CCND2,CCND3,CDKN1A,NCEH1
PRL		cytokine		1.592	bias	0.00816	ATP2A2,BOK,CCND3,CDKN1A,CTSH,FOS,HIPK3,IGFBP5,Marcks,NUPR1,OCLN,ODC1	165 (20)
TSH		complex		1.446	bias	0.00832	CCND3,CDKN1A,FOS,IGFBP5,Mt1	127 (16)
hydroxyurea		chemical drug	Activated	2.22	bias	0.00832	BAX,CCND2,CCND3,CDKN1A,MDM2	116 (17)
acetaminophen		chemical drug		0.796	bias	0.00843	ALB,CCNG1,CDKN1A,Mt1,ODC1,TF,TTR,TUBA1A,TXN	23 (2)
metformin		chemical drug		-0.164		0.00843	ADIPOR2,ALDOA,BAMBI,BAX,CCND2,DICER1,FOS,ITGB4,UCP2	122 (15)
4-hydroxytamoxifen		chemical drug		1.645	bias	0.00843	BAX,CDKN1A,CEBPA,DYNLL1,FOS,MPC1,PTTG1,RARA,TM4SF1	134 (13)
S100A4		other				0.00879	BAX,CDKN1A,MDM2,OCLN	96 (6)
SHC1		other		0.867		0.00885	BAX,CDKN1A,FOS,MEF2A,TXN	86 (5)
MTOR		kinase		0.635	bias	0.00887	AKAP13,ATP2A2,CCND3,CDKN1A,CEBPA,ERICH5,ETFA,FBXO32,GSTM5,GSTZ1,MDM2,PRDX5,PRKCZ,TXNIP	103 (10)
CALCA		other		1.065	bias	0.00902	AKAP13,ALB,FOS,GOLGB1,LMNA,ODC1	73 (7)
desmopressin		biologic drug				0.00902	ALB,ATP1A1,FOS,GOLGB1,HSPH1,LMNA
methylselenic acid		chemical reagent				0.00903	ACSL3,ALDH3A2,ATP11A,B4GALT1,CDKN1A,DYNLL1,EPHX1,ITGB4,PEG3,TUBB4B,UGT2B7
MGP		other				0.00906	ALB,HNF4A,TTR
diallyl trisulfide		chemical - endogenous non-mammalian				0.00906	CDKN1A,FOS,MDM2	114 (15)
lithium chloride		chemical drug		0.332	bias	0.00911	B4GALT1,BAX,CDKN1A,FOS,IDS,Marcks,RARA	124 (17)
L-phenylalanine		chemical - endogenous mammalian				0.00932	ALB,TTR
dithioerythritol		chemical - endogenous non-mammalian				0.00932	CXCL12,TXN
Thioredoxin reductase		group				0.00932	CXCL12,TXN
TFIIA		complex				0.00932	CCND2,FOS
PNPLA8		enzyme				0.00932	FBXO32,Mt1	65 (7)
IL-2R		complex				0.00932	CCND2,FOS	30 (3)
Lefty		group				0.00932	CDKN1A,SMAD5
LDH (family)		group				0.00932	CXCL12,TXN
TTN		kinase				0.00932	ATP2A2,Calm1 (includes others)
miR-140-5p (and other miRNAs w/seed AGUGGUU)		mature microRNA				0.00932	CXCL12,IGFBP5
MAD2L1		other				0.00932	BAX,PTTG1
CCX771		chemical reagent				0.00932	CXCL12,OCLN
CCDC80		other				0.00932	BCLAF1,CEBPA
R59949		chemical - kinase inhibitor				0.00932	CCND3,FOS	105 (10)
ciclopirox olamine		chemical drug				0.00932	CDKN1A,TF
venlafaxine		chemical drug				0.00932	BAX,FOS	82 (4)
artemisinin		chemical drug				0.00932	CDKN1A,MDM2
trovafloxacin		chemical drug		0.447	bias	0.00941	CDKN1A,CEBPA,FOS,GCLC,MDM2
FGFR1		kinase		1.342	bias	0.00948	BAX,CCND2,CDKN1A,EIF1AX,FOS,PLXNB2	116 (13)
OGT		enzyme		0.692		0.00948	AEBP1,ATP2A2,BAX,CDKN1A,FOS,MDM2	142 (15)
curcumin		chemical drug		-0.576	bias	0.0095	BAX,CCND2,CCND3,CDKN1A,CEBPA,CRY2,DAPK1,FOS,IGFBP5,ITGB4,MDM2,OCLN,TOB1,UCP2	124 (15)
CDK2		kinase		1.715	bias	0.00953	CCND3,CDKN1A,FOS,UCP2	123 (14)
baicalein		chemical drug		-1.205	bias	0.00953	BAX,CCND3,FOS,PTTG1	98 (8)
IL5		cytokine	Activated	3.278	bias	0.00979	ALDOA,ATXN1,CCND2,CCND3,CDKN1A,CRELD2,CRIP1,DRC1,DUSP6,ENDOG,HSPH1,LMO7	98 (7)
mifepristone		chemical drug		-1.408		0.00983	Acot1,BAX,CDKN1A,FOS,FOXA2,GAS6,HPGD,ITGB4,Ly6a (includes others),MDM2,Mt1,RARA,TAX1BP1	139 (13)
MSTN		growth factor		0.663		0.00999	CDKN1A,FBXO32,FOS,IGFBP5,MEF2A	70 (7)
benzo(a)pyrene		chemical toxicant		1.64	bias	0.0102	BAX,CDKN1A,EPHX1,FOS,GCLC,HSPA4L,MDM2,Mt2,SELENBP1,TF
ADCY		group				0.0102	CDKN1A,FOS,TXN
SIX5		transcription regulator				0.0102	ATP1A1,IGFBP5,WNT4
Cdkn1c		other				0.0102	BAX,CDKN1A,ITGB4
PDX1		transcription regulator		1.886	bias	0.0103	ALB,ATP2A2,CRELD2,DUSP6,HNF4A,MAN1A1,Mt1,RABGAP1L,TXNIP
CALR		transcription regulator		-1.177		0.0103	ATP2A2,Calm1 (includes others),CDKN1A,CEBPA
testosterone		chemical - endogenous mammalian		1.544	bias	0.0104	ALDOA,BAX,CDKN1A,EIF4G3,FOS,IGFBP5,MAK,Mt1,OCLN,ODC1,PRKCZ,RARA,SLC7A4,TF
RUNX1-RUNX1T1		fusion gene/product				0.0104	CDKN1A,CEBPA,CYP2S1,DUSP6,IFITM3,MDM2
FSH		complex		0.953	bias	0.0108	ALDH3A2,ARHGAP1,ATP2A2,CCND2,CHUK,DAPK1,EZR,FOS,GCLC,PDXK,RARA,SMAD5,TF,TOB1,TUBA1A
PDGF BB		complex	Activated	2.461	bias	0.0108	ANXA11,ATP2A2,CCND3,CDKN1A,DUSP6,FOS,LGALS3,LMNA,Mt1,Mt2,ODC1,SYNE1,TOB1
TCF7L2		transcription regulator	Activated	2.874	bias	0.0108	ACSL3,ADIPOR2,ALDH3A2,CCND2,CDKN1A,CLDN2,ENPP2,FBXO32,HSPA2,MAN1A1,NUDT4,PHACTR4,RALGDS
sirolimus		chemical drug	Inhibited	-2.67	bias	0.0109	ATP1A1,BAX,CCND2,CCND3,CDKN1A,CEBPA,EIF1AX,FOS,GCLC,HSP90AA1,IGFBP5,LGALS3,LMNA,MED25,Mt1,ODC1,PRDX5,TP53INP1,UCP2
CLOCK		transcription regulator		0.128		0.0109	BPHL,CEBPA,GAS8,GCC2,HIPK3,HSPH1,IGFBP5,MID1IP1,SPATA6,TIMP4,USP2
ATF4		transcription regulator	Activated	2.425	bias	0.011	ATXN1,CDKN1A,HNF4A,IGFBP5,IRAK1BP1,LGALS3,MID1IP1,NUPR1,PEG3
MEF2A	0.313	transcription regulator		0.44	bias	0.0111	ATP2A2,CLIC6,FOS,MEF2A
MED1		transcription regulator		1.154	bias	0.0111	ANKRD37,BAX,CCND2,CDKN1A,CEBPA,Foxp1,MDM2,ODC1
mir-8		microRNA		-1.071	bias	0.0113	ARHGAP5,BAX,CCND2,CDKN1A,DDIT4L,GRB7,OCLN,SMAD5,TOB1
E2F5		transcription regulator				0.0114	BAX,CDKN1A,FOXJ1
ochratoxin A		chemical toxicant				0.0114	BAX,GCLC,GSTM5
clofibrate		chemical drug		1.524	bias	0.0115	Acot1,BAX,CCND2,Mt1,Mt2,UCP2
sphingosylphosphocholine		chemical - endogenous mammalian				0.0118	DUSP6,FOS
carnobyl iron		chemical reagent				0.0118	CEBPA,HNF4A
bendamustine		chemical drug				0.0118	BAX,CDKN1A
RASSF6		other				0.0118	BAX,CDKN1A
HUWE1		transcription regulator				0.0118	CCND2,CDKN1A
TIP60		complex				0.0118	BAX,CDKN1A
CD53		other				0.0118	BAX,TPPP3
MED15		transcription regulator				0.0118	BAX,CDKN1A
PTGES3	0.605	enzyme				0.0118	NUPR1,TM4SF1
CCND2	0.254	other				0.0118	CCND2,CCND3
TSG101		transcription regulator				0.0118	CDKN1A,MDM2
USP37		peptidase				0.0118	CEBPA,RARA
CDKN3		phosphatase				0.0118	KCNQ1OT1,PEG3
SRD5A1		enzyme				0.0118	CLDN2,Mt1
benazepril		chemical drug				0.0118	CDKN1A,OCLN
geranylgeranylacetone		chemical drug				0.0118	HSPH1,TXN
tangeretin		chemical - endogenous non-mammalian				0.0118	BAX,CDKN1A
Hsp27		group				0.012	BAX,CDKN1A,FBXO32,FOS
mir-34		microRNA				0.0126	BAX,CCND2,DNAH6,SCLT1,TUBB4B
PAX7		transcription regulator	Activated	2	bias	0.0126	ATP11A,Marcks,PEG3,SCLT1,TOB1
DCAF1		kinase				0.0128	CDKN1A,TOB1,TXNIP
diazoxide		chemical drug				0.0128	BAX,ODC1,UCP2
calyculin A		chemical toxicant				0.0128	CCND2,CDKN1A,ODC1
amino acids		chemical - endogenous mammalian				0.0128	FOS,FOXA2,ODC1
SGPP2		phosphatase				0.0128	HSP90AA1,HSPA4L,HSPH1
tripterine		chemical - endogenous non-mammalian				0.0128	HSPA4L,HSPH1,TTR
zVAD-FMK		chemical - protease inhibitor		0.152		0.0129	CCND3,CDKN1A,FOS,MDM2
methamphetamine		chemical drug		1.509	bias	0.0133	BAX,FOS,OCLN,PPP3CA,TXN
ERBB2		kinase		1.979	bias	0.0137	ADIPOR2,CCND2,CCND3,CDC42EP3,CDKN1A,CHCHD10,CHUK,CPM,CRIP1,CXCL12,DSG2,DUSP18,DUSP6,FOS,GAS6,GSTZ1,IGFBP5,LGALS3,MAN1A1,Marcks,MDM2,PEG3,PLET1,POLK,ST3GAL6,STRBP,TUBA1A,ZNF703
TFAP2A		transcription regulator		-0.391		0.0138	BAX,BOK,CDKN1A,CEBPA,HIPK3,Ly6a (includes others)
TXN	0.91	enzyme		0.818		0.0138	CCND2,CDKN1A,FOS,TXN
bicalutamide		chemical drug		-1.067	bias	0.0138	CEBPA,EZR,FOS,MAK
BTNL2		transmembrane receptor		0.447	bias	0.014	APPL2,CYP2S1,DRC1,IFITM3,RALGDS
NTRK2		kinase				0.014	CCND2,CDKN1A,DAPK1,FOS,TP53BP2
lactacystin		chemical - protease inhibitor		1.788	bias	0.014	ATP1A1,CCND2,CCND3,CDKN1A,GCLC,IGFBP5,ITGB4,MDM2,TXN
sodium selenite		chemical drug				0.0141	BAX,CHUK,HPGD
NCL		other				0.0141	CDKN1A,DICER1,MDM2
Mt1	0.755	other				0.0141	CEBPA,FOS,Mt1
WR 1065		chemical drug				0.0141	BAX,CDKN1A,MDM2
FOXA1		transcription regulator		-1.52		0.0142	CDKN1A,EPHX1,FOXA2,HNF4A,LYN,RARA,TF,TTR
puromycin aminonucleoside		chemical reagent		1.664	bias	0.0144	ALB,BAX,ETFA,ITGB4,LGALS3,TTR
LINC01139		other				0.0146	ALDOA,ANKRD37
ANG		enzyme				0.0146	BAX,CDKN1A
SPRY4-IT1		other				0.0146	OCLN,ZNF703
ADIPOR2	0.192	transmembrane receptor				0.0146	ADIPOR2,UCP2
FOXJ1	0.097	transcription regulator				0.0146	FOXJ1,SPAG6
Igkv1-117		other				0.0146	CCND2,CDKN1A
DBH		enzyme				0.0146	FOS,UCP2
HDAC8		transcription regulator				0.0146	BAX,CDKN1A
allyl isothiocyanate		chemical toxicant				0.0146	BAX,FOS
mesalamine		chemical drug				0.0146	HPGD,ODC1
CBR-470-1		chemical - kinase inhibitor				0.0146	GCLC,TXN
retinol acetate		chemical drug				0.0146	RARA,TF
allopregnanolone		chemical - endogenous mammalian				0.0146	FOS,LGALS3
THRA		ligand-dependent nuclear receptor		-0.911		0.0147	ATP2A2,CDKN1A,CEBPA,CTSH,FOS,FURIN,PTTG1
INHA		growth factor		-0.186		0.015	BAX,CCND2,DNAH7,EPHX1,LMNA,TP53INP1
APC		enzyme				0.0152	CCND2,CDKN1A,CXCL12,IDH3G,IGFBP5,ODC1,PRKCZ
MAPT		other				0.0152	ALB,ALDOA,CDKN1A,FOS,GSTM5,HSP90AA1,HSPA4L,HSPH1,PRDX5,RPGR,SYNE1,TUBA1A,TUBB4B,TXN
NR3C1		ligand-dependent nuclear receptor		-0.399		0.0154	ATXN1,BAX,BOK,CDC42EP3,CDKN1A,CEBPA,DDX5,DYNLL1,ENDOG,FOS,IFT122,MDM2,MLF1,MPC1,Mt1,NME5,OCLN,PPP3CA,TNFAIP8,TP53BP2,TXN,Uox
cyclophosphamide		chemical drug		1.552	bias	0.0155	BAX,FOS,LGALS3,Ly6a (includes others),ODC1
miR-24-3p (and other miRNAs w/seed GGCUCAG)		mature microRNA				0.0156	BAX,FURIN,SMAD5
fludarabine		chemical drug				0.0156	CDKN1A,DEK,MDM2
n-nitrosomethylbenzylamine		chemical toxicant				0.0158	ALDH3A2,AMBP,BAX,DDX5,HSP90AA1,KIFAP3,PPP3CA
PLK1		kinase				0.0158	BAX,BOK,CDKN1A,MDM2
9,10-dimethyl-1,2-benzanthracene		chemical toxicant				0.0158	BAX,CDKN1A,EPHX1,GCLC
VDR		transcription regulator		1	bias	0.0159	BAX,CCND2,CCND3,CDKN1A,IGFBP5,NUPR1,ODC1,TXN,TXNIP,UCP2
RUNX1		transcription regulator		1.151	bias	0.0163	ALB,BAX,CCND3,CDKN1A,CEBPA,EVI5,IFITM3,Ly6a (includes others),Mt1,SPATA6
5-N-ethylcarboxamido adenosine		chemical reagent		1.633		0.0163	ALB,FOXA2,GCLC,ODC1,TXNIP,USP2
PRKCE		kinase		1.441	bias	0.0164	BAX,CCND3,CDKN1A,FOS,ODC1
ROR2		kinase				0.0164	BOLA1,CCND2,CDKN1A,CEBPA,MDM2
rottlerin		chemical toxicant	Inhibited	-2.171	bias	0.0164	BAX,CCND3,CDKN1A,MDM2,OCLN
D-glucose		chemical - endogenous mammalian		1.037	bias	0.0164	ALDOA,ATP2A2,BAX,CCND2,CCND3,CDKN1A,CEBPA,DIRAS2,ENPP2,FBXO32,FOS,HNF4A,KCNQ1OT1,MID1IP1,Mt1,Mt2,OCLN,ODC1,PRKCZ,TXNIP,UCP2
MAPK1		kinase		0.61		0.0165	CDKN1A,Cetn4/Gm7094,DNAH7,EVI5,FBXO32,FOS,GRB7,IFITM3,LGALS3,LGALS3BP,LMNA,MNS1,NUPR1,SPAG16
pioglitazone		chemical drug	Activated	2.746		0.0166	ADIPOR2,ATP2A2,BAX,CDKN1A,FOS,HPGD,NCEH1,UCP2
STAT6		transcription regulator		0		0.0167	Acot1,AKAP13,BAX,CCND2,CDKN1A,CLDN2,CRIP1,EPHX1,Erdr1,IFITM3,LGALS3BP,LMO7,Ly6a (includes others),SELENBP1,USP2
inosine		chemical - endogenous mammalian		1.982	bias	0.0169	IFITM3,LGALS3BP,Mt1,TUBA1A
CD24		other		0.651	bias	0.017	BCLAF1,CDKN1A,FOS,IRAK1BP1,TIMP4,TP53INP1
SMARCB1		transcription regulator	Activated	2.375	bias	0.0172	CDKN1A,DAPK1,DSG2,FOS,MDM2,PLXNB2,RAB36,SMAD5
SUB1		transcription regulator				0.0172	BAX,FOS,MDM2
MMP9		peptidase		1.067	bias	0.0172	CDKN1A,CXCL12,FOS,HPGD,OCLN
CERS2		transcription regulator				0.0176	CDKN1A,CERS6
T 0070907		chemical reagent				0.0176	CDKN1A,CEBPA
PBRM1		other				0.0176	CDKN1A,MDM2
ZFP57		transcription regulator				0.0176	KCNQ1OT1,PEG3
PIAS2		transcription regulator				0.0176	CDKN1A,FOS
NDP		growth factor				0.0176	Mt1,NUPR1
clioquinol		chemical drug				0.0176	CDKN1A,FOS
puerarin		chemical drug				0.0176	BAX,TXN
ryanodine		chemical - endogenous non-mammalian				0.0176	FOS,PRKCZ
adaphostin		chemical drug				0.0176	CCND3,CDKN1A
trestolone		chemical drug				0.0176	CCND3,CCNG1
NR1I3		ligand-dependent nuclear receptor	Activated	2.2	bias	0.0178	CDKN1A,EPHX1,GSTM5,HNF4A,MDM2,Mt1
CUL3		enzyme		1.4		0.018	FBXO32,NUDT4,PDLIM5,TCEA3
SMYD1		transcription regulator				0.018	IDH3G,MPC1,NT5C2,OXCT1
PIN1		enzyme		1.455	bias	0.0181	BAX,CDKN1A,MDM2,NFE2L1,TIMP4
KDM1A		enzyme		-1.384		0.0182	CCND2,CDH4,CDKN1A,FOXA2,IQGAP2,PTTG1,RUVBL1,TM4SF1,TRIM37
SOCS1		other		-1.786	bias	0.0182	BAX,CCND2,CCND3,CDKN1A,FOS,RALGDS,TXN
RRP1B		transcription regulator				0.0185	CCND3,CCNG1,CDKN1A,HSP90AA1,MDM2,RARA
acteoside		chemical - endogenous non-mammalian				0.0188	BAX,FOS,GCLC
PML-RARA		fusion gene/product				0.0188	CDKN1A,FOS,RARA
MXD1		transcription regulator		-1.982	bias	0.019	CCND2,CCND3,CCNG1,NAAA,ODC1
sn-1,2-didecanoylglycerol		chemical - endogenous mammalian				0.019	ODC1
trilinolein		chemical - endogenous mammalian				0.019	BAX
beta-escin		chemical drug				0.019	CDKN1A
peptide YY 3-36		biologic drug				0.019	FOS
aucubin		chemical - endogenous non-mammalian				0.019	BAX
2'-adenylic acid		chemical - endogenous mammalian				0.019	TXNIP
G protein alpha		group				0.019	FOS
growth factor receptor		group				0.019	FOS
Ahr-aryl hydrocarbon		complex				0.019	MDM2
Aspp		group				0.019	BAX
DNAJ		group				0.019	ENPP2
etarotene		chemical reagent				0.019	ODC1
3-tert-butyl-4-hydroxyanisole		chemical reagent				0.019	EPHX1
GSK 189254		chemical drug				0.019	FOS
HCG11		other				0.019	CDKN1A
LINC00475		other				0.019	CDKN1A
DNAJB12		other				0.019	BOK
pridopidine		chemical drug				0.019	FOS
AEOL 10113		chemical drug				0.019	BAX
OTUD6A		peptidase				0.019	RARA
FBXO22		enzyme				0.019	MDM2
S100A3		transporter				0.019	RARA
CD3-TCR		complex				0.019	TOB1
SRF-ELK1		complex				0.019	FOS
ARMC10		other				0.019	CDKN1A
FKBPL		other				0.019	CDKN1A
ZBTB7C		transcription regulator				0.019	CDKN1A
AKIP1	0.191	other				0.019	BAX
ARHGAP24		other				0.019	ITGB4
Lamin b		group				0.019	LMNA
NACC2		transcription regulator				0.019	MDM2
IMMT		other				0.019	CHCHD6
EBF4		transcription regulator				0.019	CDKN1A
exendin(9-39) amide		biologic drug				0.019	FOS
CXXC1		transcription regulator				0.019	CDKN1A
ZBTB8A		other				0.019	CDKN1A
ZNF667		transcription regulator				0.019	BAX
FGF14		growth factor				0.019	FOS
PCLAF		other				0.019	CDKN1A
CTU1		other				0.019	DEK
USP29		other				0.019	RARA
Oxi-4503		chemical drug				0.019	CXCL12
7-bromoindirubin-3'-oxime		chemical - kinase inhibitor				0.019	CDKN1A
vasopressins		biologic drug				0.019	FOS
inolitazone		chemical drug				0.019	CDKN1A
mediator		complex				0.019	FOS
ARHGEF17		other				0.019	FOS
AZD1480		chemical drug				0.019	TF
dixanthogen		chemical toxicant				0.019	GSTM5
CABLES1		other				0.019	CDKN1A
KIFAP3	0.27	other				0.019	FOS
CDT1		other				0.019	CDKN1A
PPY		other				0.019	FOS
UBA2		enzyme				0.019	ALB
ACVR2B		kinase				0.019	CDKN1A
GPHA2		other				0.019	FOS
RGS5		enzyme				0.019	BAX
miR-523-3p (miRNAs w/seed AACGCGC)		mature microRNA				0.019	CDKN1A
miR-690 (miRNAs w/seed AAGGCUA)		mature microRNA				0.019	CEBPA
Mir690		microRNA				0.019	CEBPA
EAF1		transcription regulator				0.019	WNT4
NPVF		other				0.019	FOS
ZBTB5		transcription regulator				0.019	CDKN1A
DHX8		enzyme				0.019	CDKN1A
SLC1A2		transporter				0.019	FOS
GPHB5		other				0.019	FOS
SCN7A		ion channel				0.019	FOS
DNASE1L3		enzyme				0.019	CDKN1A
PSMC4		peptidase				0.019	CCND2
CCNI		other				0.019	CDKN1A
ANKS1A		other				0.019	FOS
FXYD1		ion channel				0.019	CDKN1A
PSMA2		peptidase				0.019	CCND2
ALDH1L1		enzyme				0.019	CERS6
EPGN		growth factor				0.019	FOS
TAX1BP3		transcription regulator				0.019	FOS
ING3		other				0.019	CDKN1A
JAM2		other				0.019	CXCL12
JADE1		transcription regulator				0.019	CDKN1A
cytarabine/idarubicin		chemical drug				0.019	CEBPA
RAB5B		enzyme				0.019	FOS
cytarabine/filgrastim/fludarabine phosphate		biologic drug				0.019	FOS
UBE2E1		enzyme				0.019	CDKN1A
CUL9		other				0.019	CDKN1A
dulanermin		biologic drug				0.019	BAX
EXOSC10		kinase				0.019	FOS
SCML2		transcription regulator				0.019	CDKN1A
DNAH5	0.001	enzyme				0.019	DNAH6
SPAG6	0.02	other				0.019	SPAG16
TDP-665759		chemical reagent				0.019	CDKN1A
OPRL1		G-protein coupled receptor				0.019	PPP3CA
PSMD6		enzyme				0.019	CCND2
oligomycin A		chemical - endogenous non-mammalian				0.019	TXNIP
RO0281675		chemical reagent				0.019	BAX
guanfacine		chemical drug				0.019	FOS
ondansetron		chemical drug				0.019	FOS
2-amino-2-norbornanecarboxylic acid		chemical toxicant				0.019	CCND3
flurothyl		chemical drug				0.019	FOS
diisopropanolnitrosamine		chemical toxicant				0.019	CDKN1A
L 733060		chemical reagent				0.019	FOS
selfotel		chemical drug				0.019	FOS
(R)-5-(2-azetidnylmethoxy)-2-chloropyridine		chemical drug				0.019	FOS
NSC 126405		chemical reagent				0.019	CDKN1A
GYKI 52466		chemical drug				0.019	FOS
ONO-8711		chemical drug				0.019	FOS
ZBTB16-RARA		fusion gene/product				0.019	DUSP6
CTOP		chemical reagent				0.019	FOS
Ac-DEVD-CHO		chemical reagent				0.019	FOS
ibutamoren		chemical drug				0.019	FOS
LY 354740		chemical drug				0.019	FOS
droxidopa		chemical drug				0.019	FOS
S(-)-carbidopa		chemical drug				0.019	FOS
3'-adenylic acid		chemical - endogenous mammalian				0.019	TXNIP
sarcosine		chemical - endogenous mammalian				0.019	FOS
2-aminoisobutyric acid		chemical - endogenous mammalian				0.019	ALB
allose		chemical - endogenous mammalian				0.019	TXNIP
LMNB1		other				0.0192	AEBP1,CRIP1,CXCL12,LMNA
JAG1		growth factor		1.091	bias	0.0192	CCND2,CDKN1A,DUSP6,WNT4
DETA-NONOate		chemical reagent		0.404		0.0192	CDKN1A,FOS,ODC1,TXNIP
PRKAA2		kinase		-0.876	bias	0.0192	ALB,BAX,CDKN1A,CEBPA,CXCL12,Ly6a (includes others)
ONECUT1		transcription regulator				0.0194	AKAP13,AMBP,C11orf1,CEBPA,CLDN2,FOXA2,HNF4A,HSPH1,IFT74,TM4SF4,TTR
Pka		complex		-0.391	bias	0.0195	BAX,CCND3,CDKN1A,FOS,FOXA2,HNF4A,PRKCZ
TGFA	0.168	growth factor		1.428	bias	0.0199	ALB,CDKN1A,DDX5,FOS,PTTG1
MBD3		other				0.0199	CCND2,MDM2,MEF2A,Mt1,PEG3
bisindolylmaleimide I		chemical - kinase inhibitor	Inhibited	-2.428	bias	0.02	CCND2,CDKN1A,FOS,Mt1,OCLN,PTTG1
pyridaben		chemical toxicant		0	bias	0.0204	C9orf116,CEP290,MAPK15,STRBP
3-methylcholanthrene		chemical toxicant		1.829	bias	0.0204	FOS,GSTM5,Mt1,Mt2
VAV1		transcription regulator				0.0206	BAX,CCND2,FOS
ACKR3		G-protein coupled receptor				0.0206	CCND3,CDKN1A,CXCL12
butylated hydroxyanisol		chemical toxicant				0.0206	FOS,GCLC,GSTM5
vinblastine		chemical drug				0.0206	CCNG1,CDKN1A,FOS
black raspberry extract		chemical drug				0.0208	ALDH3A2,AMBP,DDX5,HSP90AA1,KIFAP3,PPP3CA
RET		kinase				0.0208	CXCL12,DUSP6,EIF4G3,FOS,HSP90AA1,HSPH1
PP2/AG1879 tyrosine kinase inhibitor		chemical - kinase inhibitor	Inhibited	-2.052	bias	0.0209	CDKN1A,DSP,FOS,LYN,PTTG1
GMNN		transcription regulator	Inhibited	-2	bias	0.0209	CDKN1A,DSP,FOXJ1,IER5,PEG3
zinc		chemical drug		1.147		0.0209	BAX,HNF4A,Mt1,SELENBP1,SLC39A4
SLC30A7		transporter				0.0209	EPHX1,EPHX4
liquiritigenin		chemical - endogenous non-mammalian				0.0209	EPHX1,FOS
DDB2		other				0.0209	BAX,CDKN1A
FOXD3		transcription regulator				0.0209	CDKN1A,FOXA2
1,10-phenanthroline		chemical toxicant				0.0209	CDKN1A,MDM2
quinacrine		chemical drug				0.0209	BAX,CDKN1A
putrescine		chemical - endogenous mammalian				0.0209	CDKN1A,FOS
androstenediol		chemical - endogenous mammalian				0.0209	BAX,CDKN1A
Fe2+		chemical - endogenous mammalian				0.0209	GCLC,TF
PPARGC1A		transcription regulator		0.433		0.0211	BAX,CDKN1A,ENDOG,FBXO32,GAS6,IGFBP5,ITGB4,MMP15,NCEH1,ODC1,OXCT1,PRDX5,UCP2
TNF		cytokine		0.125	bias	0.0215	ABR,AEBP1,ALB,ANXA11,ARHGAP18,ATP1A1,ATP2A2,B4GALT1,BAMBI,BAX,CCND2,CCND3,CDKN1A,CEBPA,CERS6,CRY1,CXCL12,DDX5,DUSP6,ENPP2,EPHX4,FBXO32,FOS,GCLC,HIPK3,HNF4A,HPGD,IGFBP5,KCNQ1OT1,LGALS3,LYN,MPC1,Mt1,Mt2,OCLN,ODC1,PLXNB2,RARA,ST3GAL6,TF,TIMP4,TM4SF1,TNFAIP8,TP53INP1,TXN,TXNIP,UCP2,USP2
hydrocortisone		chemical - endogenous mammalian		-0.816		0.0216	BCLAF1,CCND2,CCND3,CEBPA,EZR,IGFBP5,Mt1
FBXO32	0.113	enzyme		0.555		0.0218	CCND2,FOXA2,GCLC,PPP3CA,PRKCZ
BRCA1		transcription regulator		1.432	bias	0.0219	BAX,CCNG1,CDKN1A,ENPP2,EZR,Ly6a (includes others),MDM2,RUVBL2
HNRNPA2B1		other				0.0223	CRIP1,DDR1,IDS,MAST4,MEIS2,UBXN10,WNT4
IFT88	0.195	other				0.0224	ALB,CEBPA,FOXA2
ICMT		enzyme				0.0224	AEBP1,CDKN1A,LMNA
melatonin		chemical - endogenous mammalian		0.573		0.0225	BAX,CDKN1A,CRY1,CRY2,FOS,Mt1
estrogen		chemical drug	Activated	3.21	bias	0.0228	ALB,CDKN1A,CRY2,CXCL12,FOS,FOXA2,HSPH1,IGFBP5,MDM2,PTTG1,RARA
ITK		kinase		1.342	bias	0.0229	BAX,FOS,Ly6a (includes others),LYN,TF
mycophenolic acid		chemical drug		0.447	bias	0.0229	CCND2,CCND3,CDKN1A,OCLN,PDLIM5
NCOR2	0.185	transcription regulator				0.0229	CDKN1A,CEBPA,FOS,RARA
Pln		other				0.0229	ALDH3A2,ALDOA,ATP1A1,EZR
luteolin		chemical drug				0.0229	BAX,FOS,GCLC,HNF4A
FMR1		translation regulator		-0.808	bias	0.0231	ALDOA,EIF1AX,Erdr1,MRPS6,NAAA,ST3GAL6,TF
SREBF1		transcription regulator		1.432	bias	0.0232	ALDOA,BAX,CDKN1A,CEBPA,FBXO32,HNF4A,LGALS3,NUPR1,TF,UCP2
isobutylmethylxanthine		chemical toxicant		0.161	bias	0.0232	ACSL3,AEBP1,ALDH3B1,CDKN1A,CEBPA,ETFA,FOS,Mt1,Mt2
MRTFA		transcription regulator		0		0.0232	CDC42EP3,CXCL12,FOS,GSTM5,HPGD,LMNA,OSCP1,RAMP1
STAT5A		transcription regulator		1.166		0.0233	BAX,CCND2,CCND3,CDKN1A,CEBPA,FOS,MDM2,SELENBP1,TIMP4,TM4SF1,TXNIP
HOXA10		transcription regulator		-1.633	bias	0.0239	CDKN1A,ENPP2,GAS6,HSP90AA1,IGFBP5,MEIS2,PEG3,WNT4
lithium		chemical drug		-0.686		0.0239	BAX,CDKN1A,FOS,MDM2,OCLN
PTK2		kinase				0.0243	CDKN1A,DSP,FOS,OCLN
Fgf		group				0.0243	CCND3,FOS,ODC1
ITGAV		transmembrane receptor				0.0243	BAX,CDKN1A,FOS
ZBTB7A		transcription regulator				0.0243	CDKN1A,FOS,MDM2
GDF11		growth factor				0.0243	ATP2A2,FOS,SMAD5
MITF		transcription regulator	Activated	2.961	bias	0.0243	ATP1A1,CDKN1A,DAPK1,FBXO32,FOS,HPGD,LGALS3,PSMC3IP,ST3GAL6,TXNIP
Mmp		group				0.0244	DSG2,OCLN
trypsin		group				0.0244	CDKN1A,FOS
POLR3G		enzyme				0.0244	EZR,LMNA
harmine		chemical - endogenous non-mammalian				0.0244	BAX,FOS
PPP3CB		phosphatase				0.0244	CDKN1A,FBXO32
CSF2RA		transmembrane receptor				0.0244	CCND2,FOS
CRY2	0.089	enzyme				0.0244	CRY1,FOS
UGCG		enzyme				0.0244	BAX,CDKN1A
SERPINB5		other				0.0244	BAX,CDKN1A
RPL22		translation regulator				0.0244	BAX,CDKN1A
CRY1	0.147	enzyme				0.0244	CEBPA,FOS
PPP5C		phosphatase				0.0244	CDKN1A,MDM2
HSPA1A/HSPA1B		enzyme				0.0244	CDKN1A,FOS
cytochalasin B		chemical toxicant				0.0244	CDKN1A,PTTG1
phencyclidine		chemical drug				0.0244	BAX,FOS
hydroquinone		chemical - endogenous mammalian				0.0244	FOS,GCLC
rhodioloside		chemical - endogenous non-mammalian				0.0244	BAX,GCLC
SKF-38393		chemical reagent				0.0244	FOS,PRKCZ
astressin 2B		biologic drug				0.0244	FOS,HPGD
PRKAA1		kinase	Inhibited	-2.449	bias	0.0246	ALB,BAX,CDC42EP3,CDKN1A,CXCL12,Ly6a (includes others),OCLN
imatinib		chemical drug		-0.443	bias	0.0249	BAX,CCND2,CDKN1A,CEBPA,CXCL12,HSPA2,LYN,MDM2,NFE2L1,PRPF4B,PTTG1,SRSF10
NFYA		transcription regulator				0.025	ALB,CDKN1A,EPHX1,PTTG1,TXNIP
TP73		transcription regulator		1.53	bias	0.0256	BAX,CCND3,CCNG1,CDKN1A,CLMN,FOXJ1,IGFBP5,ITGB4,MDM2,NUPR1,RFX3,TIMP4,TTR,WNT4
1810019D21Rik		other		-1	bias	0.0256	CCNG1,CDKN1A,PALMD,SYNE1
SP1		transcription regulator	Activated	2.614	bias	0.0259	AEBP1,ALDH3A2,ATP2A2,BAX,CCND2,CCND3,CDKN1A,CEBPA,CXCL12,EZR,FOS,HNF4A,IFITM3,Marcks,Mt1,PTTG1,RARA,TIMP4
KRAS		enzyme		0.478		0.0259	ALDOA,CCND3,CDKN1A,CPM,DUSP6,FLII,FOS,GCLC,IFITM3,IQGAP2,LGALS3,LMO7,Ly6a (includes others),MDM2,MID1IP1,NUDC,OCLN,ODC1,PEG3,PTTG1,ST3GAL6,TMEM109,TXNIP
oleic acid		chemical - endogenous mammalian		0.08	bias	0.0261	BAX,FOS,GCLC,Mt1,Mt2,UCP2
CBFB		transcription regulator		-1.067		0.0261	CEBPA,DSP,IFT80,LGALS3BP,OCLN
SOX17		transcription regulator				0.0263	FOS,FOXA2,HNF4A
SKP2		other				0.0263	CCND2,CDKN1A,ODC1
ANXA2		other				0.0263	BAX,CDKN1A,MDM2
LOC105372576		other				0.0263	DYNLL1,FOS,UCP2
4-(2-aminoethyl)benzenesulfonylfluoride		chemical - protease inhibitor				0.0263	CDKN1A,DICER1,ENPP2
daunorubicin		chemical drug				0.0263	BAX,CDKN1A,MDM2
CD40		transmembrane receptor		1.944	bias	0.0264	BAX,CCND2,CCND3,CDKN1A,CXCL12,DUSP6,FOS,LGALS3,Ly6a (includes others)
AMPK		complex		0.164		0.027	BAX,CCND2,CDKN1A,CXCL12,FBXO32,UCP2
LMNA	0.423	other				0.028	ANKRD37,BAMBI,CEBPA,CERS6,FOXA2,GCLC,IER5,LMNA,MMP15,MXD4
GON4L		transcription regulator				0.0281	CCND2,CCND3
dihydroartemisinin		chemical drug				0.0281	CDKN1A,MDM2
Ahr-aryl hydrocarbon-Arnt		complex				0.0281	BAX,CDKN1A
Hnf3		group				0.0281	AMBP,TTR
Ptprd		phosphatase				0.0281	CDKN1A,IGFBP5
NAE1		enzyme				0.0281	CCND3,CDKN1A
APOA4		transporter				0.0281	FOS,FOXA2
MYF5		transcription regulator				0.0281	CCND3,CDKN1A
MYF6		transcription regulator				0.0281	CCND3,CDKN1A
CBX2		transcription regulator				0.0281	CCND2,CDKN1A
miR-135a-5p (and other miRNAs w/seed AUGGCUU)		mature microRNA				0.0281	MEF2A,SMAD5
GHRHR		G-protein coupled receptor				0.0281	CCND3,FOS
SPHK2		kinase				0.0281	CDKN1A,LYN
ATXN7		other				0.0281	IGFBP5,Marcks
CSF3R		transmembrane receptor				0.0281	CXCL12,FOS
GTF2I		transcription regulator				0.0281	CDKN1A,FOS
HNRNPD		transcription regulator				0.0281	CDKN1A,FOS
selenite		chemical toxicant				0.0281	BAX,Mt1
diacylglycerol		chemical - endogenous mammalian				0.0281	ODC1,UCP2
Cd2+		chemical toxicant				0.0281	FOS,Mt1
manganese		chemical - endogenous mammalian				0.0281	CDKN1A,GOLIM4
KDM6A		enzyme				0.0283	ALB,TM4SF4,TTR
ITGAM		transmembrane receptor				0.0283	CHUK,Foxp1,TTR
diclofenac		chemical drug				0.0283	CDKN1A,FOS,HPGD
exenatide		biologic drug				0.0283	BAX,FOS,TXNIP
indole-3-carbinol		chemical drug				0.0283	BAX,CDKN1A,FOS
ZFHX3		transcription regulator				0.0284	ALB,CDC14A,IFITM3,PTTG1,TUBA1A
PTEN	0.343	phosphatase		0.03		0.0284	ARHGAP5,BAX,CCND3,CDKN1A,CEBPA,EP400,FOS,FOXA2,IDH3G,IFT27,IFT88,IGFBP5,KIF3A,LGALS3,MDM2,MXD4,PLXNB2,SRSF10,TP53BP2,TRAF3IP1,WNT4
HES1		transcription regulator		-1.117	bias	0.0286	CCND3,CDKN1A,CEBPA,MDM2
SP600125		chemical - kinase inhibitor		-0.541	bias	0.0289	BAX,CDKN1A,CPM,DDIT4L,DSG2,EIF1AX,FOS,HNF4A,ITGB4,NUPR1,TTC30B
GDF2		growth factor	Activated	2.19	bias	0.0296	ATP1A1,CXCL12,ENPP2,FOS,RAMP1
R5020		chemical reagent				0.0296	CDKN1A,CEBPA,LGALS3BP,NAGA,TXNIP
POU5F1		transcription regulator		0.66	bias	0.0298	ALB,BAX,CDKN1A,DAPK1,DSP,FOXA2,IER5,MEF2A,PEG3,RARA,TF,TP53BP2
PSMB11		peptidase		-0.816	bias	0.03	CDH4,CLDN2,CXCL12,LGALS3,OCLN,PRKCZ
PARP1		enzyme	Inhibited	-2.159	bias	0.03	BAX,CDKN1A,CXCL12,FOS,LGALS3BP,MDM2
SIN3A		transcription regulator				0.0301	CCND2,FBXO32,PEG3,TXNIP
CSHL1		growth factor		0.943	bias	0.0301	CCND3,FOS,FOXA2,HNF4A
TFDP1		transcription regulator				0.0305	CCND3,CDKN1A,PTTG1
ETV4		transcription regulator				0.0305	B4GALT1,BAX,HPGD
miR-1-3p (and other miRNAs w/seed GGAAUGU)		mature microRNA	Inhibited	-2.791	bias	0.0306	Calm1 (includes others),DDX5,ITGB4,MEF2A,MXD4,RABGAP1L,RABL2A,SYNE1
ADAM10		peptidase				0.0308	ATP2A2,CXCL12,FOS,HIPK1,RPGR
E2F1		transcription regulator		1.809	bias	0.0311	ADIPOR2,BAX,BOK,Calm1 (includes others),CCND2,CCND3,CDKN1A,CEBPA,FOS,MDM2,NUDC,PTTG1,RUVBL1,TP53BP2,TP53INP1,UCP2
EGFR		kinase		1.47	bias	0.0311	BAX,CDKN1A,CLDN2,CPM,CXCL12,DSG2,FOS,IGFBP5,IQGAP2,IQUB,NUDC,ODC1,PRKCZ,TUBB4B,TXNIP,WNT4
cyclic AMP		chemical - endogenous mammalian		1.479	bias	0.0313	CCND2,CDKN1A,CEBPA,FOS,IGFBP5,LGALS3BP,ODC1,RARA,TF,TXNIP
Akt		group		-0.113	bias	0.0314	BAX,CCND2,CCND3,CDKN1A,CPM,CXCL12,FBXO32,FOS,HPGD,LMNA,MDM2,NCEH1,ST3GAL6
OSMR		transmembrane receptor				0.0317	ALB,BAX,FOS,Mt2
IL6ST		transmembrane receptor		0.152	bias	0.0317	ALB,ATP2A2,CLDN2,ENPP2
rotenone		chemical toxicant		-0.849		0.0317	BAX,FOS,TXNIP,UCP2
fenofibrate		chemical drug		1.747	bias	0.032	Acot1,ACSL3,ADIPOR2,ATP11A,FBXO32,MAN1A1,PCM1,TP53INP1,TXNIP,UCP2
cyclic GMP		chemical - endogenous mammalian				0.032	CDKN1A,FOS
fluoride		chemical - endogenous mammalian				0.032	BAX,FOS
FOXG1		transcription regulator				0.032	CCND2,CDKN1A
PLCG1		enzyme				0.032	CCND3,FOS
ZBTB33		transcription regulator				0.032	BAX,CDKN1A
SMC3		other				0.032	CXCL12,ODC1
miR-143-3p (and other miRNAs w/seed GAGAUGA)		mature microRNA				0.032	IGFBP5,MDM2
HOXB4		transcription regulator				0.032	CCND2,CCND3
SP2		transcription regulator				0.032	CDKN1A,FOS
zinc protoporphyrin IX		chemical - endogenous mammalian				0.032	CDKN1A,GCLC
asiatic acid		chemical reagent				0.032	BAX,CDKN1A
deguelin		chemical drug				0.032	BAX,CDKN1A
MAP2K1		kinase	Activated	2.319	bias	0.0322	CDKN1A,CEBPA,CLDN2,DUSP6,FOS,FURIN,ITGB4,LGALS3
FGFR3		kinase				0.0327	CDKN1A,DUSP6,FOS
MMP2		peptidase				0.0327	CDKN1A,CXCL12,OCLN
FOSB		transcription regulator				0.0327	CEBPA,FOS,HPGD
alvocidib		chemical drug				0.0327	CCND3,CDKN1A,TXN
F2RL1		G-protein coupled receptor				0.0333	DUSP6,FOS,ITGB4,TXNIP
GPS2		transcription regulator		-0.762	bias	0.0333	ADIPOR2,ASAP1,CDKN1A,ZNF703
PLN		transporter				0.0333	ALDH3A2,ALDOA,ATP1A1,EZR
BCL11B		transcription regulator		-1.124	bias	0.0333	CDKN1A,Foxp1,MDM2,NCEH1
paclitaxel		chemical drug		1.937	bias	0.0333	BAX,CCNG1,CDC42EP3,CDKN1A,CHUK,CRY2,DUSP6,ENPP2,MDM2,TP53INP1,WNT4
bleomycin		chemical drug		1.651	bias	0.034	BAX,CDKN1A,CEBPA,CXCL12,FOXJ1,LGALS3,PTTG1,TIMP4
LEP		growth factor		1.064	bias	0.0346	ACSL3,ATP2A2,BAX,BOK,CDKN1A,DUSP6,FOS,GCLC,IFT27,IFT88,KIF3A,MDM2,MED25,TRAF3IP1,UCP2
okadaic acid		chemical toxicant		0.485	bias	0.0347	CCND2,CCND3,FOS,HNF4A,ODC1
ursodeoxycholic acid		chemical - endogenous mammalian		0.849		0.0349	BAX,GCLC,LGALS3,PRKCZ
12-(3-adamantan-1-yl-ureido) dodecanoic acid		chemical reagent		0.577		0.0349	BAX,BCLAF1,BOK,TP53BP2
OTX2		transcription regulator				0.0349	CDH4,ENPP2,TF,TTR
NSD2		enzyme				0.035	BAX,CCND2,FOS
FOXA3		transcription regulator				0.035	FOXA2,TF,TTR
mir-19		microRNA				0.035	CCND2,CDKN1A,HIPK3
SPRY2		other				0.035	CDKN1A,FOS,OCLN
ethylene glycol tetraacetic acid		chemical reagent				0.035	ATP2A2,BAX,FOS
isoproterenol		chemical drug	Activated	2.607	bias	0.0353	ACSL3,ALDH3B1,ATP1A1,FOS,LGALS3,ODC1,UCP2
ST1926		chemical drug		-1.89	bias	0.0353	CDKN1A,DYNLL1,HSP90AA1,KIF3A,ODC1,TOMM7,TXN
diethylstilbestrol		chemical drug		1.877	bias	0.036	AMBP,CDKN1A,DUSP6,FOS,MDM2,MNS1,MXD4,PTTG1,TF,VEZF1,WNT4
epothilone B		chemical drug				0.0362	CDKN1A,MDM2
picropodophyllin		chemical drug				0.0362	CCND2,IFITM3
CSF2RB		transmembrane receptor				0.0362	CCND2,FOS
NTF4		growth factor				0.0362	FOS,TUBA1A
PFKFB3		kinase				0.0362	CCND3,CXCL12
ZNF148		transcription regulator				0.0362	CDKN1A,ODC1
UBD		other				0.0362	Acot1,UCP2
ZFPM2		transcription regulator				0.0362	ATP2A2,WNT4
BLNK		other				0.0362	CCND2,MDM2
NPY1R		G-protein coupled receptor				0.0362	FOS,UCP2
STIM1		ion channel				0.0362	GCLC,GSTO1
3-aminobenzamide		chemical toxicant				0.0362	CDKN1A,MDM2
4-nitroquinoline-1-oxide		chemical toxicant				0.0362	CDKN1A,MDM2
tranylcypromine		chemical drug				0.0362	CDKN1A,FOS
allyl sulfide		chemical drug				0.0362	EPHX1,GSTM5
MBD2		transcription regulator				0.0367	CDC42EP3,CDKN1A,MEF2A,NUPR1
HDAC1		transcription regulator	Inhibited	-2.08		0.0371	BAMBI,BAX,CCND2,CDKN1A,CEBPA,FOS,ITGB4,MDM2,Mt1,Mt2
MAPK9		kinase		0.149	bias	0.0373	BAX,CDKN1A,FOS,ITGB4,LGALS3BP,LMNA,LMO7
UCP1		transporter		0.174		0.0373	CHCHD10,FBXO32,GSTO1,GSTZ1,NUPR1,ODC1,UCP2
NR1I2		ligand-dependent nuclear receptor		1		0.0373	ALDH3A2,CDKN1A,CEBPA,GSTM5,HNF4A,TF,Uox
NR1D1		ligand-dependent nuclear receptor				0.0374	CRY1,FOS,NUPR1
PC-SPES		chemical drug				0.0375	CCNG1,CDKN1A,HSP90AA1,SELENBP1,TXN
L-leucine		chemical - endogenous mammalian				0.0376	ALB
Npm		group				0.0376	CDKN1A
L-ornithine		chemical - endogenous mammalian				0.0376	CDKN1A
L-isoleucine		chemical - endogenous mammalian				0.0376	ALB
arbutin		chemical drug				0.0376	CDKN1A
monooleylphosphatidic acid		chemical - endogenous mammalian				0.0376	ENPP2
Mellitin		chemical - endogenous non-mammalian				0.0376	BAX
VX-944		chemical drug				0.0376	BAX
atiprimod		chemical drug				0.0376	BAX
chartreusin		chemical reagent				0.0376	CDKN1A
Pak		group				0.0376	MDM2
ginsenoside Rh2		chemical - endogenous non-mammalian				0.0376	FOS
opioid receptor		group				0.0376	TXN
MSK1/2		group				0.0376	FOS
PLA2		group				0.0376	FOS
Smad3-Smad4		complex				0.0376	BAX
Max-Myc		complex				0.0376	ODC1
endrin		chemical toxicant				0.0376	CEBPA
omethoate		chemical toxicant				0.0376	CDKN1A
prunetin		chemical - endogenous non-mammalian				0.0376	ADIPOR2
NPS		other				0.0376	FOS
GMNC		other				0.0376	FOXJ1
2,4,5-trichlorophenoxyacetic acid		chemical toxicant				0.0376	GCLC
Rbx1		enzyme				0.0376	PTTG1
NSA2		other				0.0376	CDKN1A
FBXL12		other				0.0376	CDKN1A
IL17RC		transmembrane receptor				0.0376	PLET1
FBXO25		enzyme				0.0376	FOS
PCDH9		other				0.0376	BAX
C1QL4		other				0.0376	CEBPA
FUZ		other				0.0376	FOXA2
ZBTB49		transcription regulator				0.0376	CDKN1A
METTL8		enzyme				0.0376	CEBPA
RNF126		enzyme				0.0376	CDKN1A
WDR13		other				0.0376	CDKN1A
ZDHHC7		enzyme				0.0376	TF
MLXIP		transcription regulator				0.0376	TXNIP
MIR31HG		other				0.0376	CDKN1A
HNF1α dimer		complex				0.0376	HNF4A
Importin alpha		group				0.0376	CDKN1A
ACER3		enzyme				0.0376	CDKN1A
VTRNA2-1		other				0.0376	BAX
OMG		G-protein coupled receptor				0.0376	FOS
neuropeptide Y		biologic drug				0.0376	UCP2
bucillamine		chemical drug				0.0376	BAX
INTERLEUKIN		group				0.0376	FOS
ETV7		transcription regulator				0.0376	RARA
ZMAT3		other				0.0376	BAX
safflor yellow B		chemical - endogenous non-mammalian				0.0376	BAX
MAPK8IP2		other				0.0376	FOS
OAZ1		enzyme				0.0376	ODC1
SRD5A2		enzyme				0.0376	Mt1
ZNF224		transcription regulator				0.0376	ALDOA
HPGD	0.277	enzyme				0.0376	CDKN1A
SYMPK		other				0.0376	CLDN2
KLHL40		other				0.0376	TP53INP1
NMB		other				0.0376	FOS
ELP3		enzyme				0.0376	DEK
mir-136		microRNA				0.0376	CXCL12
miR-637 (and other miRNAs w/seed CUGGGGG)		mature microRNA				0.0376	NUPR1
miR-411-5p (and other miRNAs w/seed AGUAGAC)		mature microRNA				0.0376	TXNIP
miR-3189-3p (miRNAs w/seed CCUUGGG)		mature microRNA				0.0376	SF3B2
mir-605		microRNA				0.0376	MDM2
mir-186		microRNA				0.0376	PTTG1
mir-940		microRNA				0.0376	ARHGAP1
mir-630		microRNA				0.0376	DICER1
ELAC2		enzyme				0.0376	CDKN1A
MAGEA4		other				0.0376	CDKN1A
POLDIP3		other				0.0376	CDKN1A
HPS1		other				0.0376	LGALS3
TSPYL2		other				0.0376	CDKN1A
PEX2		other				0.0376	CDKN1A
PLIN3		other				0.0376	BAX
NASP		other				0.0376	CDKN1A
ARHGEF28		other				0.0376	FOS
CCT5		other				0.0376	CDKN1A
NKIRAS1		enzyme				0.0376	CHUK
GAD1		enzyme				0.0376	FOS
DDX24		enzyme				0.0376	CDKN1A
POU4F3		transcription regulator				0.0376	FOS
GABRG2		ion channel				0.0376	FOS
MXD4	0.463	transcription regulator				0.0376	ODC1
ADAMTS13		peptidase				0.0376	LGALS3
COMP		other				0.0376	LGALS3
PGAM1		phosphatase				0.0376	CDKN1A
LRP1B		transmembrane receptor				0.0376	NCEH1
ING5		other				0.0376	CDKN1A
RAMP3		G-protein coupled receptor				0.0376	FOS
UBE2M		enzyme				0.0376	ETFA
TH		enzyme				0.0376	FOS
KHDRBS2		other				0.0376	CDKN1A
cycloastragenol		chemical reagent				0.0376	CDKN1A
GALR2		G-protein coupled receptor				0.0376	CDKN1A
PCBP4		other				0.0376	CDKN1A
GRAP		other				0.0376	FOS
PRIMA1		other				0.0376	BAX
COX6A2		enzyme				0.0376	UCP2
CK-666		chemical reagent				0.0376	OCLN
CGGBP1		transcription regulator				0.0376	CDKN1A
UBE2V1		transcription regulator				0.0376	FOS
RAMAC		other				0.0376	RUVBL1
LOC100359583/Ptma		other				0.0376	BAX
CRTAP		other				0.0376	CDKN1A
Cops2		transcription regulator				0.0376	CDKN1A
MI-63		chemical reagent				0.0376	CDKN1A
DUOX2		enzyme				0.0376	CDKN1A
ZFYVE16		other				0.0376	CDKN1A
miR-101b-3p (miRNAs w/seed UACAGUA)		mature microRNA				0.0376	ATXN1
E-c-HDMAPP		chemical reagent				0.0376	CCND2
securinine		chemical reagent				0.0376	CDKN1A
S7		chemical - kinase inhibitor				0.0376	BAX
SI163		chemical - kinase inhibitor				0.0376	BAX
S29		chemical - kinase inhibitor				0.0376	BAX
reactive nitrogen species		chemical - other				0.0376	BAX
polyethylene glycol		chemical drug				0.0376	CDKN1A
1-(3-chlorophenyl)piperazine		chemical drug				0.0376	FOS
NPC 15437		chemical - kinase inhibitor				0.0376	FOS
daphnoretin		chemical - endogenous non-mammalian				0.0376	BAX
palytoxin		chemical toxicant				0.0376	DUSP6
telomestatin		chemical - endogenous non-mammalian				0.0376	CDKN1A
ephedrine		chemical drug				0.0376	TXN
kynurenic acid		chemical - endogenous mammalian				0.0376	CDKN1A
8-methyl-pyridoxatin		chemical reagent				0.0376	TF
XK469		chemical drug				0.0376	BAX
dicumarol		chemical drug				0.0376	Mt1
AN-207		chemical toxicant				0.0376	BAX
LFM-A13		chemical - kinase inhibitor				0.0376	CCND2
p-dimethylaminoazobenzene		chemical toxicant				0.0376	ALB
KR 62436		chemical reagent				0.0376	CXCL12
glyoxal		chemical toxicant				0.0376	BAX
chlordiazepoxide		chemical drug				0.0376	FOS
SSR180575		chemical drug				0.0376	BAX
1-o-hexadecyl-2-o-methyl-rac-glycerol		chemical - kinase inhibitor				0.0376	CDKN1A
hypericin		chemical drug				0.0376	ATP2A2
nisoldipine		chemical drug				0.0376	FOS
4-nitrophenol		chemical - endogenous mammalian				0.0376	BAX
SC144		chemical reagent				0.0376	ENPP2
hdm-2 antagonistic peptide		chemical reagent				0.0376	CDKN1A
tegaserod		chemical drug				0.0376	FOS
isoalantolactone		chemical - endogenous non-mammalian				0.0376	BAX
veratridine		chemical toxicant				0.0376	FOS
swainsonine		chemical - endogenous non-mammalian				0.0376	BAX
vinflunine		chemical drug				0.0376	CDKN1A
lysophospholipids		chemical - endogenous mammalian				0.0376	OCLN
N(omega)-hydroxyarginine		chemical - endogenous mammalian				0.0376	CDKN1A
5-thio-D-glucose		chemical reagent				0.0376	FOS
3-O-methylglucose		chemical reagent				0.0376	TXNIP
glutathione		chemical - endogenous mammalian				0.0384	ALB,BAX,CDKN1A,GCLC
cytarabine		chemical drug		1.951	bias	0.0384	BAX,CDKN1A,MDM2,TP53INP1
REL		transcription regulator	Activated	2.137	bias	0.0386	ATP11A,ATXN1,CCND2,CDKN1A,ENDOG,EVI5,FOS,IFT74,TTC30B
fulvestrant		chemical drug		-0.803		0.0387	BAX,CCDC34,CDKN1A,CXCL12,DYNLL1,FOS,IGFBP5,PTTG1,USP19,WNT4
EIF2AK2		kinase	Activated	2.219	bias	0.0389	BAX,CDKN1A,FOS,LGALS3BP,TUBA1A
AR		ligand-dependent nuclear receptor		1.557	bias	0.039	ATP2A2,CDKN1A,CXCL12,DSG2,EPHX1,GAS6,HSPH1,IGFBP5,ITGB4,Ly6a (includes others),Marcks,NUPR1,OCLN,ODC1,SLC7A4,TF
MET		kinase	Activated	2	bias	0.039	CCND2,CDKN1A,FBXO32,FOS,GCLC,MDM2
miR-27a-3p (and other miRNAs w/seed UCACAGU)		mature microRNA				0.0399	BAX,ODC1,SMAD5
ABL1		kinase				0.0399	CCND2,CDKN1A,MDM2
carbamylcholine		chemical drug				0.0399	CDKN1A,CHUK,FOS
pimagedine		chemical drug				0.0399	ALB,BAX,MDM2
4-methylnitrosoamino-1-(3-pyridinyl)-1-butanone		chemical toxicant				0.0399	CDKN1A,FOS,TF
ETV5		transcription regulator		0.818		0.0404	BAX,CXCL12,LGALS3,LMO7,MID1IP1
PKD1		ion channel		-0.174		0.0404	AADAC,ATP1A1,CDKN1A,ODF3B,SPATA6,SYNE1,TNFAIP8,TTR
bevacizumab		biologic drug				0.0405	CXCL12,DICER1
Foxo		group				0.0405	CDKN1A,FBXO32
Smad2/3-Smad4		complex				0.0405	CDKN1A,IGFBP5
CNOT6L		enzyme				0.0405	IGFBP5,TUBB4B
GIP		other				0.0405	BAX,FOS
mir-7		microRNA				0.0405	BAX,CDKN1A
GAL		other				0.0405	CDKN1A,FOS
ARG1		enzyme				0.0405	CCND3,CDKN1A
DDX17		enzyme				0.0405	CDKN1A,MDM2
ITPR1		ion channel				0.0405	BOK,FOS
PLD2		enzyme				0.0405	CCND3,PRKCZ
ethyl pyruvate		chemical drug				0.0405	BAX,OCLN
decursin		chemical - endogenous non-mammalian				0.0405	BAX,CDKN1A
cerulenin		chemical drug				0.0405	CDKN1A,UCP2
isoliquiritigenin		chemical - endogenous non-mammalian				0.0405	BAX,CDKN1A
TWIST1		transcription regulator		-1.431	bias	0.0405	BAX,CDKN1A,CXCL12,FOS,IGFBP5,LMNA,TF
wortmannin		chemical - kinase inhibitor	Inhibited	-2.207	bias	0.0414	BAX,CCND2,CCND3,CDKN1A,EIF1AX,EZR,FOS,GCLC
cephaloridine		chemical drug		1.432	bias	0.0418	DNAH9,DSG2,GSTM5,HSPH1,VPREB3
YAP1		transcription regulator		1.193	bias	0.0419	BAX,CDC42EP3,CDKN1A,DICER1,FBXO32,FOS,LMNA,NUPR1,OCLN,RPS27L
indomethacin		chemical drug		0.659	bias	0.0421	BAX,CDKN1A,DYNLL1,FOS,IFITM3,ITGB4,LGALS3,OCLN,UCP2
PP1		chemical - kinase inhibitor				0.0425	CCND2,FOS,ODC1
T3-TR-RXR		complex				0.0425	MDM2,STRBP,UCP2
conjugated linoleic acid		chemical drug				0.0425	CEBPA,FOS,GCLC
AGTR1		G-protein coupled receptor				0.0425	FOS,GSTM5,TXNIP
benzyl isothiocyanate		chemical - endogenous non-mammalian				0.0425	BAX,ENDOG,FOS
APP		other		1.596	bias	0.0427	ALB,ALDOA,ASCC1,BAX,CALML4,CCND2,CDC14A,CDKN1A,CXCL12,ENPP2,FOS,Foxp1,HSP90AA1,IGFBP5,LGALS3,Ly6a (includes others),Mt1,OCLN,PRDX5,RAMP1,RPGR,TP53INP1,TTR,TUBA1A,TUBB4B,TXN
MRTFB		transcription regulator		0.378	bias	0.0427	CDC42EP3,GSTM5,HPGD,IGFBP5,LMNA,OSCP1,RAMP1
RAS		group		-0.142	bias	0.0428	B4GALT1,CCND3,CDKN1A,CEBPA,FOS,ODC1
Pdgf (complex)		complex	Activated	2.144	bias	0.0434	BAX,CCND2,CDKN1A,FOS,ODC1
CEBPD		transcription regulator		1.96	bias	0.0434	ALB,B9D1,CDKN1A,FOS,IGFBP5
RB1		transcription regulator		-1.116		0.0435	APPL2,ATP1A1,BAX,C9orf116,CCND3,CDKN1A,CEBPA,DEK,EZR,FOS,GSTO1,IFITM3,PTTG1,TOMM7,TUBA1A
tamoxifen		chemical drug		1.836		0.0436	ALDH3A2,AMBP,BAX,CDKN1A,CXCL12,EPHX1,FOS,MDM2,SYNE1,TXN,UCP2
ESR2		ligand-dependent nuclear receptor		1.616		0.0437	BAMBI,CDKN1A,CHUK,CPM,CXCL12,DNAH11,ENPP2,FOS,GCLC,HPGD,HSPA2,LMNA,MPC1,OCLN,RARA,USP19
S100A9		other		-0.239	bias	0.0439	CPM,ENPP2,FURIN,ITGB4,TNFAIP8,TRAF3IP1,TXNIP
JAK1		kinase		1.131	bias	0.044	CDKN1A,ENPP2,FOS,TF
camptothecin		chemical drug		1.248	bias	0.044	ALDOA,BAMBI,BAX,CCNG1,CDKN1A,DUSP6,FOS,IER5,IQGAP2,LGALS3,MDM2,Mt1,PEG3,PPP3CA,RARA,SYNE1,TOB1,TP53INP1
metribolone		chemical reagent		1.287	bias	0.0444	ACSL3,ALDOA,B4GALT1,BAX,CDKN1A,ETFA,EZR,FOS,HSPH1,IGFBP5,ITGB4,MCEE,TM4SF1,TXNIP
EIF4E		translation regulator	Activated	2.574	bias	0.0445	BCLAF1,CDKN1A,CEBPA,LGALS3BP,ODC1,PRDX5,PTGES3,TP53BP2
PLC		group				0.045	FOS,ODC1
PKNOX2		transcription regulator				0.045	CDKN1A,IGFBP5
KLK4		peptidase				0.045	CCNG1,CDKN1A
RNF20		enzyme				0.045	CDKN1A,FOS
GRK2		kinase				0.045	BAX,FOS
PDGFRA		kinase				0.045	CDKN1A,FOS
TACR1		G-protein coupled receptor				0.045	ADIPOR2,FOS
ellagic acid		chemical - endogenous non-mammalian				0.045	BAX,CDKN1A
melphalan		chemical drug				0.045	BAX,CDKN1A
CSF1R		kinase				0.0451	CCND2,CDKN1A,FOS
EFNA4		kinase				0.0451	DUSP6,FOXA2,ITGB4
CCR5		G-protein coupled receptor				0.0451	BAX,CXCL12,FOS
butyric acid		chemical - endogenous mammalian	Activated	2.403		0.0458	ALB,BAX,CCND2,CCNG1,CDKN1A,DAPK1,DDR1,DEK,ESYT2,FOS,FURIN,GCLC,MDM2,TP53BP2
ID1		transcription regulator		-1.033	bias	0.046	CDKN1A,FOXA2,Ly6a (includes others),TF
TCOF1		transporter				0.046	ASAP1,BCLAF1,BPHL,NAF1
2-deoxyglucose		chemical drug		1.206		0.046	CDKN1A,FOS,ODC1,TXNIP
RARA	0.113	ligand-dependent nuclear receptor		-0.194		0.0461	ARHGAP1,CDKN1A,CEBPA,CLMN,EPHX4,FOS,LGALS3BP,MXD4,PTTG1,RARA,UBXN10,ZNF703
MAPK8		kinase		-0.38	bias	0.0462	B4GALT1,CDKN1A,DUSP6,FOS,HIPK3,RARA,WNT4
VEGFB		growth factor				0.0479	ATP2A2,BAX,PRDX5
RPS6KB1		kinase				0.0479	ATP1A1,CDKN1A,EIF1AX
EFNA3		kinase				0.0479	DUSP6,FOXA2,ITGB4
D-galactosamine		chemical - endogenous mammalian				0.0479	ALB,BAX,FOS
ouabain		chemical drug				0.0479	ATP1A1,CDKN1A,FOS
KDM3B		enzyme				0.048	ALDH3A2,DAPK1,PALMD,PPP3CA
ETS2		transcription regulator		1.982	bias	0.048	CDKN1A,DUSP6,FOS,HPGD
MEF2D		transcription regulator				0.048	CCND3,FOS,GCLC,MEF2A
LHX1		transcription regulator	Activated	2.219	bias	0.0481	CLDN2,FOXA2,HNF4A,Ly6a (includes others),MSI2
CGA		other		-0.447		0.0481	BAX,CRELD2,MXD4,NUPR1,TP53INP1
cardiotoxin		chemical - other				0.0486	CCND2,CCND3,EZR,HSP90AA1,MMP15,PEG3,UCP2
GLI1		transcription regulator	Activated	2.764	bias	0.0488	CCND2,CDKN1A,EZR,FOXA2,IDS,LMNA,MRPS6,SYNE1
MYOD1		transcription regulator	Activated	2.138	bias	0.0489	ALDOA,CCND3,CDKN1A,CYP2S1,ENPP2,HIPK3,HSPA4L,IGFBP5,MEF2A
Creb		group		1.562	bias	0.0495	ATP2A2,CDKN1A,CEBPA,CLMN,FOS,Foxp1,HPGD,MED31,PSMC3IP,TCTEX1D2,TF
rituximab		biologic drug				0.0496	BAX,CDKN1A
NUMB		other				0.0496	CDKN1A,Mt2
CTBP2		transcription regulator				0.0496	MDM2,OCLN
miR-503-5p (miRNAs w/seed AGCAGCG)		mature microRNA				0.0496	CDC14A,CDKN1A
ITGB4	0.158	transmembrane receptor				0.0496	BAX,ENPP2
RAE1		other				0.0496	CDKN1A,IER5
IL2RB		transmembrane receptor				0.0496	CCND3,FOS
ATR		kinase				0.0496	BAX,RBM39
DPP-23		chemical reagent				0.0496	BAX,HSP90AA1
ethoxyquin		chemical toxicant				0.0496	GCLC,GSTM5
metyrapone		chemical drug				0.0496	CXCL12,FOS
acetyl-L-carnitine		chemical - endogenous mammalian				0.0496	BAX,CDKN1A
peroxynitrite		chemical toxicant				0.0496	FOS,LYN
ADIPOQ		other		0.321		0.0499	ADIPOR2,CDKN1A,CEBPA,FADS6,FOS,PRDX5,UCP2
NR1H3		ligand-dependent nuclear receptor	Activated	2.219		0.0659	ACSL3,CDKN1A,GAS6,GSTM5,MID1IP1,Mt1,Mt2,RARA
BTK		kinase		1.977		0.0702	CCND2,CCND3,CDKN1A,CEBPA,MDM2
bortezomib		chemical drug		1.814		0.101	BAX,CCND2,CDKN1A,CXCL12,HSP90AA1,MDM2,ODC1,TP53BP2
2-amino-5-phosphonovaleric acid		chemical - other	Inhibited	-2.186		0.134	ANKRD37,DUSP6,FOS,FURIN,NUDT4
ciprofloxacin		chemical drug	Inhibited	-2		0.16	ALDH3B1,EPB41L5,PLXNB2,RUVBL1
NKX2-3		transcription regulator		1.99		1	ANKRD37,C2CD4B,CDKN1A,TCTEX1D2

## Sheet: DBA+ duct cluster 4 vs all
© 2000-2020 QIAGEN. All rights reserved.
Upstream Regulator	Expr Log Ratio	Molecule Type	Predicted Activation State	Activation z-score	Flags	p-value of overlap	Target Molecules in Dataset	Mechanistic Network
TP53		transcription regulator	Activated	2.929		4.4e-24	ALDH1A1,ANKRD1,ANXA2,ANXA3,BCL3,BIRC2,BIRC3,BTG2,CAMK2N1,CD44,CD47,CEBPB,COMT,CP,CRYAB,CSF1,DSTN,EDN1,EZR,F11R,F3,FLRT2,FSTL1,FXYD3,GADD45B,GPM6B,HSP90AA1,HSPB1,HSPG2,IGF1,IGFBP7,ISG15,JUNB,JUND,KLF6,KRT18,Ly6a (includes others),MYH9,NDRG1,NFKB2,NFKBIA,PDLIM1,PMEPA1,PTP4A1,SEMA3C,SFN,SHROOM3,SLC6A6,TACC2,TGFB3,TIMP2,TIMP3,Tpm1,TSC22D3,YWHAH,ZFP36L1	89 (14)
IL1B		cytokine	Activated	4.235	bias	1.78e-23	B2M,BCL3,BIRC2,BIRC3,BTG2,CD14,CD44,CEBPB,CP,CRYAB,CSF1,EDN1,F3,GADD45B,HLA-A,HLA-E,HSPB1,HSPG2,IFNGR1,IFRD1,IGF1,ISG15,JUNB,JUND,KRT19,NAD+,NFKB2,NFKBIA,PLSCR1,PTGFR,PTP4A1,RELB,S100A10,S100A6,SCX,SDC4,SPARC,TGFB3,TIMP2,TIMP3,TMEM176B,TSC22D3	88 (16)
NFKBIA	0.452	transcription regulator		1.242	bias	8.32e-23	ANKRD1,BCL3,BIRC2,BIRC3,BTG2,CEBPB,CP,CRYAB,CSF1,CTNNA1,F3,GADD45B,HLA-A,ISG15,ITGA3,JUNB,KLF5,KRT18,LY6E,MFGE8,NFKB2,NFKBIA,PDLIM1,PMEPA1,RELB,SDC4,SEMA3C,TIMP2,TIMP3,TMEM176B	87 (14)
HRAS		enzyme		-0.098	bias	1.93e-22	ACTG1,ANKRD1,ANXA2,ANXA3,B2M,BIRC3,BTG2,CD44,CEBPB,CRIM1,CSF1,CSRP2,EFEMP1,FLRT2,FSTL1,HSP90AA1,HSPB1,Ifi27,JUNB,KLF5,KLF6,KRT18,KRT19,MFGE8,MYL12A,NFKBIA,PDLIM1,PMEPA1,SHROOM3,SIRPA,SPARC,TGFB3,TIMP3,Tpm1,WLS	84 (10)
beta-estradiol		chemical - endogenous mammalian		1.413	bias	2.65e-22	ANXA3,BIRC3,BTG2,CD14,CD44,CEBPB,CLDN4,CLDN7,COMT,CP,CRIM1,DCLK1,EDN1,ELF1,F3,FSTL1,GADD45B,HLA-A,HLA-E,HSPB1,IFRD1,IGF1,IGFBP7,IL6ST,ISG15,JUNB,JUND,KLF6,KRT18,KRT19,KRT7,LMNA,LTB,Muc1,MYL12A,NDRG1,NFKB2,NFKBIA,Oasl2,PDZK1IP1,PGLYRP1,PTGFR,PTP4A1,RTP4,S100A6,SDC4,SEMA3C,SFN,SHISA4,SPARC,TGFB3,TIMP2,TIMP3,TSC22D3,TUFT1,WFDC2,YWHAH	96 (18)
TNF		cytokine	Activated	4.392	bias	1.31e-21	APOBEC3B,B2M,BCL3,BIRC2,BIRC3,BTG2,CD14,CD44,CD47,CDC42EP5,CEBPB,CLDN4,CLDN7,CP,CRYAB,CSF1,CXCL16,EDN1,EFHD2,F11R,F3,GADD45B,HLA-A,HLA-E,HSPG2,IFNGR1,IGF1,ISG15,JUNB,JUND,KLF5,KLF6,KRT18,LTB,MYH9,NFKB2,NFKBIA,PDPN,PLSCR1,PTGFR,RELB,S100A10,SAMD4A,SDC4,SEMA3C,SPARC,TAPBP,TGFB3,TIMP2,TIMP3,TMEM176B,TSC22D3,WLS	104 (15)
IL4		cytokine		1.434	bias	1.54e-20	ACTG1,AHNAK,ANXA2,BCL3,BIRC2,Bst2,CD14,CD44,CSF1,CTNNA1,CXCL16,EFHD2,F3,FLRT2,GLIPR2,GPM6B,IGF1,IL6ST,ISG15,JUNB,JUND,KLF6,LTB,Ly6a (includes others),MYH9,NDRG1,NFKB2,NFKBIA,PLEC,PLSCR1,RNF213,S100A10,SAMD4A,SIRPA,TAPBP,TGFB3,TIMP2,TIMP3,TMEM176B	90 (15)
KRAS		enzyme	Inhibited	-2.11		1.96e-20	AHNAK,B2M,BCAM,BIRC3,CD44,CEBPB,CRYAB,DCLK1,EFEMP1,F3,FSTL1,FXYD3,GPM6B,HSPB1,HSPG2,ISG15,JUNB,KLF6,LTBP4,Ly6a (includes others),Muc1,NFKB2,NFKBIA,Oasl2,PDPN,RHOC,S100A6,SDC4,SH2D4A,SIRPA,SPARC,TIMP2,TIMP3,Tpm1,ZFP36L1	96 (16)
IKBKB		kinase	Activated	2.643	bias	2.48e-20	ANKRD1,BIRC2,BIRC3,CD44,CEBPB,CP,CSF1,CXCL16,EDN1,F3,HLA-A,IGFBP7,ISG15,JUNB,KLF5,KRT18,LTB,NFKB2,NFKBIA,RELB,SEMA3C,TIMP2,TIMP3,TMEM176B	100 (15)
TGFB1		growth factor	Activated	3.596	bias	8.31e-20	AHNAK,ANKRD1,ANXA2,B2M,BCL3,CAMK2N1,CD14,CD44,CEBPB,CLDN4,CSF1,CSRP2,DSG2,EDN1,F3,GADD45B,HSP90AA1,HSPB1,HSPG2,IFRD1,IGF1,IGFBP7,ITGA3,JUNB,JUND,KRT18,KRT19,KRT7,Ly6a (includes others),MYH9,MYL12A,NFKBIA,PDLIM4,PDPN,PDZK1IP1,PLSCR1,PMEPA1,RHOC,S100A10,S100A6,SDC4,SPARC,SPPL2A,TACC2,TGFB3,TIMP2,TIMP3,Tpm1,TSC22D3,VAT1	102 (20)
dexamethasone		chemical drug		1.802		1.84e-19	ACTG1,ALDH1A1,ANKRD1,ANXA3,B2M,BCL3,BIRC2,BIRC3,BTG2,CD44,CD47,CEBPB,CP,CRYAB,CSF1,DDAH2,EDN1,EZR,F3,FLRT2,FSTL1,GADD45B,HLA-A,IFNGR1,IFRD1,IGF1,IL6ST,ISG15,ITGA3,JUNB,JUND,KLF5,KLF6,KRT7,LTB,LTBP4,Ly6a (includes others),LY6E,MFGE8,NFKB2,NFKBIA,PAH,PDLIM1,PLEC,RELB,S100A10,SEC14L1,SPARC,TGFB3,TIMP2,TIMP3,TMEM176B,TSC22D3,ZFP36L1	102 (14)
IFNG		cytokine	Activated	4.072	bias	5.25e-19	B2M,BCL3,BIRC2,BIRC3,Bst2,CD14,CD44,CEBPB,CP,CSF1,CXCL16,EDN1,F11R,F3,FLRT2,GLIPR2,HLA-A,HLA-E,HSP90AA1,HSPB1,HSPG2,IFNGR1,IGF1,ISG15,JUNB,JUND,KLF6,KRT19,LTB,Ly6a (includes others),LY6E,MYH9,NFKB2,NFKBIA,PLSCR1,RELB,RTP4,S100A10,SDC4,SLC6A6,SYT7,TAPBP,TIMP3,TSC22D3	84 (14)
poly rI:rC-RNA		biologic drug	Activated	4.242	bias	4.24e-16	B2M,BIRC2,BIRC3,Bst2,CD14,CD44,CD47,CEBPB,CSF1,EDN1,EZR,GADD45B,HLA-A,HLA-E,IFNGR1,IGF1,ISG15,JUNB,KLF6,KRT19,LTB,LY6E,NFKB2,NFKBIA,Oasl2,RELB,SDC4,SFTPD	87 (14)
tretinoin		chemical - endogenous mammalian	Activated	3.126	bias	7.85e-16	AHNAK,ALDH1A1,ANXA2,BCL3,BIRC2,BIRC3,BTG2,CD14,CD44,CD47,CEBPB,CP,DDAH2,EDN1,F3,HLA-A,HSP90AA1,HSPB1,IFNGR1,IGF1,IGFBP7,IL6ST,ISG15,KLF5,KRT18,KRT19,KRT7,Ly6a (includes others),LY6E,MYH9,NDRG1,PDLIM4,PLSCR1,RNF213,RTP4,S100A10,SAMD9L,SIRPA,SLC6A6,SPARC,TGFB3,TSC22D3	84 (21)
decitabine		chemical drug	Activated	4.873	bias	1.1e-14	ANKRD1,ANXA2,B2M,BIRC3,CD44,COMT,DSG2,EZR,GADD45B,HLA-E,IGFBP7,ISG15,ITGA3,JUNB,KLF6,KRT18,KRT7,NDRG1,NFKBIA,PDLIM4,RASSF3,RTP4,S100A10,SEMA3C,SFN,SPARC,TIMP2,TIMP3,Tpm1	91 (14)
PGR		ligand-dependent nuclear receptor	Activated	3.1	bias	1.33e-14	BIRC2,BIRC3,CD44,CEBPB,CLDN7,COMT,EDN1,EZR,F3,KLF5,KRT18,NDRG1,NFKBIA,PDLIM1,PTP4A1,RHOC,S100A6,TGFB3,TSC22D3	95 (17)
RELA		transcription regulator	Activated	3.66	bias	1.52e-14	ANKRD1,B2M,BCL3,BIRC2,BIRC3,BTG2,CD14,CD44,CEBPB,CRYAB,EDN1,F3,IGF1,ISG15,JUNB,KRT18,LTB,NFKB2,NFKBIA,RELB,S100A6,SDC4,TAPBP	86 (15)
CHUK		kinase	Activated	2.12	bias	1.85e-14	CEBPB,CP,CSF1,F3,GADD45B,HLA-A,HSP90AA1,ISG15,JUNB,KLF5,NFKB2,NFKBIA,PLSCR1,RELB,SEMA3C,TIMP3,TMEM176B	90 (14)
ERBB2		kinase		0.766	bias	2.06e-14	AHNAK,ANXA2,BCAM,BCL3,BIRC3,BTG2,CD47,CEBPB,CHMP2B,CLDN4,CLDN7,DSG2,EDN1,F3,FSTL1,FXYD3,GPM6B,HSPB1,IL6ST,JUNB,KRT7,NDRG1,NFKB2,PDLIM4,PMEPA1,S100A6,SHROOM3,SIRPA,SPARC,TAPBP,TIMP3	90 (19)
JUN		transcription regulator	Activated	2.85	bias	4.93e-14	ANXA2,BCL3,BIRC2,BIRC3,CD14,CD44,COMT,CSF1,CXCL16,EDN1,EZR,F3,IGFBP7,JUNB,LMNA,NFKB2,NFKBIA,RELB,S100A10,SFTPD,SLC6A6,SPARC,TIMP3	82 (12)
lipopolysaccharide		chemical drug	Activated	4.508	bias	1.08e-13	ANXA3,APOBEC3B,BCL3,BIRC2,BIRC3,CD14,CD2AP,CD44,CEBPB,CP,CRYAB,CSF1,CXCL16,EDN1,F3,FSTL1,GADD45B,HLA-A,HSPB1,IFRD1,IGF1,IL6ST,ISG15,ITGA3,JUNB,JUND,KLF6,Ly6a (includes others),MYH9,NFKB2,NFKBIA,PGLYRP1,PLSCR1,PMEPA1,PTGFR,RELB,SDC4,SFTPD,SIRPA,SPARC,TAPBP,TIMP2,TIMP3,TSC22D3	93 (16)
ESR1		ligand-dependent nuclear receptor		-1.488		1.62e-13	AHNAK,ANXA3,BIRC3,CEBPB,CLDN4,COMT,CP,CRIM1,DSG2,EDN1,EFEMP1,F3,GADD45B,HLA-E,HSP90AA1,IFRD1,IGF1,IL6ST,JUNB,JUND,KRT19,KRT7,LTB,LTBP4,NFKB2,NFKBIA,RELB,RTP4,SEC14L1,SEMA3C,SLC6A6,TAPBP,TGFB3,TIMP2,TSC22D3,WASF2	94 (18)
C11orf95-RELA		fusion gene/product	Activated	3.162	bias	2.31e-13	BCL3,BIRC3,CD44,CSF1,NFKB2,NFKBIA,RELB,S100A6,SDC4,TAPBP
progesterone		chemical - endogenous mammalian		0.755		2.7e-13	ALDH1A1,BIRC3,CEBPB,CLDN4,COMT,CP,CRYAB,CSF1,CTNNA1,EZR,F3,IGF1,KLF5,KRT7,Muc1,NDRG1,NFKBIA,PDLIM1,PDPN,PDZK1IP1,S100A6,SFN,TGFB3,TIMP3,WFDC2	91 (13)
MYC		transcription regulator		0.098	bias	8.52e-13	BIRC2,CAMK2N1,CD44,CD47,CLDN7,CRYAB,CSRP2,CTNNA1,EDN1,EFEMP1,EZR,F3,FSTL1,GADD45B,HLA-A,HLA-E,HSP90AA1,HSPB1,ITGA3,KLF6,KRT7,Ly6a (includes others),NDRG1,NFKBIA,Oasl2,PLSCR1,S100A10,S100A6,SPARC,TIMP2,Tpm1,WLS,ZFP36L1	85 (12)
doxorubicin		chemical drug	Activated	3.259	bias	1.58e-12	ANXA2,BIRC2,BIRC3,BTG2,CD14,CD44,CD47,CLDN4,CP,EDN1,F3,IGFBP7,KRT18,NDRG1,NFKBIA,PMEPA1,S100A10,SFN,SLC6A6,TGFB3,Tpm1	94 (19)
STAT6		transcription regulator		-1.129		1.97e-12	AHNAK,BCL3,BIRC2,Bst2,EFHD2,FLRT2,GADD45B,Gm12854/S100a11,GPM6B,IGF1,IL6ST,ISG15,LTB,Ly6a (includes others),NFKBIA,PLSCR1,RNF213,S100A10,SAMD4A,TMEM176B	71 (10)
estrogen receptor		group		1.432		2.07e-12	CD44,CLDN4,EDN1,F11R,HSP90AA1,IGF1,ITGA3,KRT18,KRT19,KRT7,LY6E,SPARC,TGFB3,TIMP2,TIMP3,TSC22D3	104 (17)
F2		peptidase	Activated	3.518	bias	2.26e-12	BCL3,BIRC2,BIRC3,CD44,EDN1,F3,HSP90AA1,IGF1,JUNB,KLF6,MYH9,NFKBIA,RELB,SAMD4A,SDC4,TGFB3,TIMP2	88 (14)
methylprednisolone		chemical drug		0.399		2.31e-12	ALDH1A1,ANXA2,ANXA3,B2M,CD44,CLDN7,COMT,F3,FSTL1,IFNGR1,IGF1,IL6ST,KRT19,Ly6a (includes others),SDC4,SH2D4A,SIRPA,SPARC,TAPBP,TIMP3,Tpm1,ZFP36L1
IKBKG		kinase	Activated	3.504	bias	3.32e-12	BIRC3,CEBPB,CP,CSF1,HLA-A,ISG15,JUNB,KLF5,NFKB2,NFKBIA,RELB,SEMA3C,TMEM176B	98 (14)
PDGF BB		complex	Activated	2.537	bias	3.44e-12	BCL3,CD44,CEBPB,CP,CRYAB,CSF1,CSRP2,EDN1,F3,HLA-E,IGF1,JUNB,KLF6,LMNA,PDLIM1,SLC6A6,TGFB3,ZFP36L1	89 (24)
ERK1/2		group		1.985	bias	8.16e-12	B2M,BIRC2,BIRC3,CD44,CDC42EP5,CEBPB,EDN1,EZR,F3,HLA-A,ITGA3,JUNB,JUND,RHOC,S100A6,TAPBP,TIMP2	76 (13)
SP600125		chemical - kinase inhibitor	Inhibited	-2.038	bias	6.41e-11	APOBEC3B,BTG2,CD2AP,CD44,CEBPB,CLDN4,CXCL16,DSG2,F3,IGF1,ISG15,ITGA3,JUNB,PLEC,PLSCR1,SPARC	84 (16)
NFkB (complex)		complex	Activated	3.924	bias	8.05e-11	ANKRD1,BCL3,BIRC2,BIRC3,CD44,CEBPB,CSF1,EDN1,F3,GADD45B,HLA-A,HSPB1,ISG15,JUNB,KRT19,LTB,NFKB2,NFKBIA,RELB,SDC4,TGFB3,TIMP2	86 (13)
IgG		complex		-1.891	bias	1.99e-10	B2M,CEBPB,CLDN4,CSF1,EDN1,EZR,HLA-E,HSPB1,ISG15,JUND,KRT18,Ly6a (includes others),PDPN,TAPBP	85 (15)
PRL		cytokine		1.917	bias	3.85e-10	ANXA2,ANXA3,B2M,CAMK2N1,ISG15,KRT19,LY6E,MFGE8,PDLIM4,PDPN,PLSCR1,PTGFR,SAMD9L,SPARC,TIMP2
FOS		transcription regulator		1.986	bias	4.73e-10	ACTG1,CD14,CD44,CXCL16,EDN1,EZR,F3,FLRT2,FSTL1,JUNB,KLF6,MYH9,NFKB2,PDPN,PMEPA1,PTP4A1,S100A10,SFTPD,SIRPA,Tpm1	74 (7)
AGT		growth factor	Activated	2.804	bias	7.06e-10	ANXA3,CD14,CD44,CP,DDAH2,EDN1,EFEMP1,F3,HSPB1,HSPG2,IGF1,IL6ST,KLF5,NAD+,NDRG1,NFKB2,NFKBIA,PTGFR,TGFB3	94 (20)
thioacetamide		chemical toxicant	Activated	3.383	bias	7.16e-10	ANXA2,BIRC3,CD14,CD44,CLDN4,CP,CSRP2,FSTL1,IGF1,S100A10,SPARC,TGFB3,TIMP2,Tpm1	97 (11)
SOX2		transcription regulator		-1.067	bias	8.61e-10	ALDH1A1,CD44,CLDN7,EFEMP1,ELF1,FAM107B,GADD45B,IGF1,KLF6,KRT18,KRT19,KRT7,NFKB2,Oasl2,TGFB3,TIMP3,TSPAN15,WLS	22 (2)
SB203580		chemical - kinase inhibitor		-1.753	bias	9.51e-10	ANXA3,APOBEC3B,CD2AP,CD47,CEBPB,CRYAB,EFEMP1,F3,ISG15,JUNB,JUND,NFKB2,S100A10,SPARC,TGFB3,TIMP2,TIMP3,WLS	86 (16)
IL1A		cytokine	Activated	2.677	bias	1.01e-09	ALDH1A1,BCL3,BIRC2,BIRC3,CD44,CSF1,HSPG2,IFNGR1,IGF1,JUNB,NFKBIA,PDZK1IP1,S100A10,SPARC	96 (16)
gefitinib		chemical drug		1.23	bias	1.21e-09	ALDH1A1,BTG2,CEBPB,GADD45B,HSPB1,IGF1,KRT19,Muc1,NFKB2,RELB,TIMP2,TIMP3	64 (5)
caffeic acid phenethyl ester		chemical drug	Inhibited	-2.563	bias	1.38e-09	BIRC3,CD44,F3,HSPB1,KLF6,NFKB2,NFKBIA,PTGFR,RELB,S100A6	89 (18)
tetradecanoylphorbol acetate		chemical drug	Activated	3.581	bias	1.56e-09	APOBEC3B,BCL3,BIRC3,BTG2,CD14,CD44,CSF1,EZR,F3,GADD45B,IFNGR1,IGF1,ISG15,JUNB,JUND,KLF5,KLF6,LTB,MYH9,NFKB2,NFKBIA,PDPN,PTGFR,RELB,S100A10,SDC4,SPARC,TSC22D3	73 (14)
EGF		growth factor		1.697	bias	2.14e-09	BIRC2,BTG2,CD44,CEBPB,CLDN7,EDN1,EZR,F3,FSTL1,IGF1,JUNB,JUND,KRT19,PDPN,PLSCR1,S100A10,SPARC,TGFB3,TIMP3	98 (21)
HMGA1		transcription regulator		-0.231	bias	2.23e-09	B2M,CD44,CRYAB,FSTL1,IGF1,IGFBP7,JUNB,Ly6a (includes others),LY6E,SDC4,SPARC	64 (7)
NR3C1		ligand-dependent nuclear receptor		0.901		2.59e-09	B2M,BIRC2,BIRC3,CD47,CEBPB,COMT,CRYAB,EDN1,F3,GADD45B,IGF1,ISG15,JUND,LTB,NFKB2,NFKBIA,PDPN,SEMA3C,TIMP3,TSC22D3,YWHAH	105 (18)
cisplatin		chemical drug	Activated	2.878	bias	3.22e-09	ALDH1A1,ANKRD1,ANXA2,BIRC2,BIRC3,BTG2,CD14,CD44,CLDN4,CP,CSF1,EDN1,F11R,F3,IL6ST,JUND,KRT19,LMNA,NFKBIA,S100A10,SLC6A6,TIMP3,Tpm1	90 (19)
epigallocatechin-gallate		chemical drug		-0.48	bias	3.55e-09	BIRC2,CEBPB,EDN1,ELF1,F3,GADD45B,IL6ST,ISG15,JUNB,JUND,NFKBIA,RELB,TIMP2	91 (16)
Alpha catenin		group	Inhibited	-3.11	bias	3.85e-09	ADAM33,BCL3,BIRC3,FSTL1,IGF1,IGFBP7,IL6ST,NFKBIA,RELB,RHOC
Interferon alpha		group	Activated	3.487	bias	4.07e-09	APOBEC3B,B2M,BCL3,Bst2,BTG2,F3,HLA-A,Ifi27,IL6ST,ISG15,NFKBIA,Oasl2,PLSCR1,RNF213,RTP4,SAMD9L,TAPBP	52 (13)
IRF3		transcription regulator		1.451	bias	5.02e-09	AHNAK,APOBEC3B,B2M,BIRC2,BIRC3,Bst2,ISG15,JUNB,Oasl2,PAH,SAMD9L,TIMP3	42 (9)
dihydrotestosterone		chemical - endogenous mammalian	Activated	2.864	bias	5.22e-09	B2M,BTG2,Gm12854/S100a11,HLA-A,HSP90AA1,HSPB1,IGF1,IGFBP7,IL6ST,KRT19,LY6E,NDRG1,NFKBIA,PMEPA1,SLCO3A1,SPARC,TACC2,TIMP2,TIMP3	92 (14)
GDF2		growth factor	Activated	3	bias	5.33e-09	ANXA3,CRYAB,EDN1,GADD45B,IGF1,NFKBIA,SEMA3C,SLC6A6,YWHAH
lomustine		chemical drug	Activated	2.828	bias	6.13e-09	ANXA2,BIRC3,CD14,CD44,CLDN4,CP,S100A10,Tpm1
Ap1		complex	Activated	2.177	bias	6.49e-09	CD44,EDN1,EZR,F3,IFRD1,IGF1,KRT18,NDRG1,RELB,SFTPD,SPARC	81 (12)
triamterene		chemical drug	Activated	2.813	bias	6.94e-09	ANXA2,BIRC3,CD14,CD44,CLDN4,CP,S100A10,Tpm1
gentamicin		chemical drug	Activated	2.514	bias	6.95e-09	ALDH1A1,BTG2,CEBPB,CSRP2,HSP90AA1,HSPB1,IFRD1,JUNB,KLF6,PTP4A1,VAT1,YWHAH,ZFP36L1
camptothecin		chemical drug	Activated	2.887	bias	7.57e-09	ANXA2,BIRC2,BIRC3,BTG2,CD47,CSF1,EDN1,F3,GADD45B,HLA-A,HLA-E,NFKB2,NFKBIA,PGLYRP1,PLEC,PTP4A1,SDC4,SFN,ZFP36L1	89 (16)
Ifnar		group	Activated	2.929	bias	7.79e-09	APOBEC3B,B2M,Bst2,HLA-A,HLA-E,IFNGR1,ISG15,RNF213,TAPBP	71 (15)
TP63		transcription regulator		1.409	bias	7.85e-09	APOBEC3B,BCL3,F11R,F3,IGFBP7,ITGA3,JUNB,KLF6,KRT7,MFGE8,MLPH,RELB,SFN,SYT7,TGFB3,TIMP3,WFDC2
STAT1		transcription regulator	Activated	2.897	bias	8.58e-09	APOBEC3B,B2M,CD14,EDN1,HLA-E,IGF1,ISG15,Ly6a (includes others),LY6E,Oasl2,PLSCR1,RNF213,RTP4,S100A10,SAMD9L	68 (12)
fenamic acid		chemical reagent	Activated	2.81	bias	9.95e-09	ANXA2,BIRC3,CD14,CD44,CLDN4,CP,S100A10,Tpm1
diethylstilbestrol		chemical drug		0.162	bias	1.09e-08	CD14,DCLK1,F3,HLA-A,IGF1,MFGE8,Muc1,PGLYRP1,S100A6,SFN,SHISA4,SPARC,TGFB3,WFDC2	55 (7)
SMARCA4		transcription regulator		1.994	bias	1.2e-08	AHNAK,CD44,CD47,CEBPB,CP,CSF1,F3,GADD45B,HLA-E,IGF1,IGFBP7,ITGA3,KRT18,LMNA,MFGE8,NFKB2,PTP4A1,S100A6,TIMP2	80 (11)
ECSIT		transcription regulator	Activated	2.385	bias	1.27e-08	BCL3,CD44,JUNB,NFKB2,NFKBIA,RELB	52 (10)
gentamicin C		chemical drug	Activated	2.828	bias	1.4e-08	ANXA2,BIRC3,CD14,CD44,CLDN4,CP,S100A10,Tpm1
allopurinol		chemical drug	Activated	2.132	bias	1.58e-08	ANXA2,BIRC3,CD14,CD44,CLDN4,CP,F3,S100A10,Tpm1
puromycin aminonucleoside		chemical reagent		1.667	bias	1.58e-08	ACTG1,ANXA2,CD14,CD2AP,CD44,CLDN4,CP,S100A10,Tpm1
IL2		cytokine	Activated	2.026	bias	1.75e-08	BIRC3,CAMK2N1,CD44,CD47,CSF1,DSG2,EDN1,ELF1,GADD45B,IFNGR1,JUND,KLF6,LTB,Ly6a (includes others),LY6E,NDRG1,PDLIM4,RHOC,WLS	70 (11)
curcumin		chemical drug	Inhibited	-2.232	bias	1.92e-08	BIRC2,BIRC3,CD44,CEBPB,CLDN4,CTNNA1,EDN1,F3,JUNB,JUND,NFKBIA,SFTPD,TACC2,TIMP3,TSC22D3	91 (19)
PD98059		chemical - kinase inhibitor		-1.57	bias	2.01e-08	ANKRD1,APOBEC3B,CD14,CD44,CEBPB,EDN1,F3,IGF1,JUNB,JUND,KRT19,PLEC,S100A10,SIRPA,TGFB3,TIMP2,TSC22D3,ZFP36L1	81 (18)
mifepristone		chemical drug		0.853		2.02e-08	CD14,CEBPB,CLDN7,CTNNA1,F3,JUNB,Ly6a (includes others),Muc1,NDRG1,NFKBIA,PGLYRP1,RHOC,S100A6,TIMP3	100 (18)
PTEN		phosphatase		0.18		2.35e-08	BCL3,BTG2,CD44,CEBPB,EDN1,F3,GPM6B,IFRD1,IGF1,ISG15,JUND,KLF5,KLF6,KRT19,Muc1,NDRG1,PLEC,SDC4,SFTPD,TSC22D3	91 (23)
WT1		transcription regulator		0.692		2.44e-08	BTG2,CD2AP,CSF1,EZR,HSPG2,IGF1,JUNB,JUND,NDRG1,SLC6A6,TGFB3,TIMP3
MYCN		transcription regulator	Inhibited	-2.927		2.58e-08	ACTG1,ALDH1A1,B2M,CRIM1,HLA-A,IGFBP7,ITGA3,MYH9,MYL12A,NDRG1,S100A10,SPARC,TIMP2
PDX1		transcription regulator		1.897	bias	2.95e-08	ACTG1,ANXA2,CAMK2N1,CD44,F3,JUNB,KLF6,KRT18,PDZK1IP1,PTP4A1,SLC6A6
IRAK4		kinase				2.95e-08	BIRC3,BTG2,CXCL16,EDN1,IFNGR1,IFRD1,NFKBIA,PLSCR1	78 (15)
CD40LG		cytokine	Activated	2.779	bias	3.16e-08	B2M,BIRC2,BIRC3,CD44,CSF1,F3,HSP90AA1,ISG15,JUNB,JUND,LTB,NFKB2,NFKBIA,RELB,ZFP36L1	75 (14)
NFKB1		transcription regulator	Activated	2.789	bias	3.57e-08	ANKRD1,B2M,BCL3,BIRC3,BTG2,CD44,CSF1,ISG15,LTB,NFKB2,NFKBIA,RELB,SDC4	82 (14)
PRKCD		kinase	Activated	2.668	bias	3.64e-08	BIRC2,BIRC3,CEBPB,CXCL16,JUNB,KLF5,KLF6,NFKB2,NFKBIA,PLSCR1,RELB	88 (13)
ALDH1A2		enzyme		-1.633	bias	3.78e-08	ALDH1A1,CD44,CSF1,Ly6a (includes others),SPARC,TIMP3
MTPN		transcription regulator	Activated	2.8	bias	3.97e-08	CP,EDN1,IGF1,LTB,S100A10,S100A6,SPARC,TGFB3
forskolin		chemical toxicant		1.884	bias	4.17e-08	BCL3,BTG2,CD14,CD44,CEBPB,CRYAB,CSF1,EDN1,EZR,GADD45B,IGF1,ITGA3,JUNB,JUND,KRT18,MFGE8,NFKBIA,PTP4A1,S100A10,SERINC2	93 (20)
JUNB	0.289	transcription regulator	Activated	2.412	bias	4.18e-08	BCL3,CD44,COMT,CXCL16,JUNB,MYL12A,NFKB2,RELB,SFTPD,TIMP3	85 (13)
ID3		transcription regulator		0.956		4.26e-08	ADSS2,BCL3,BTG2,CD44,CEBPB,CSF1,GADD45B,IFNGR1,KLF6,LTB,RELB	53 (7)
LY294002		chemical - kinase inhibitor	Inhibited	-3.064	bias	4.43e-08	BIRC3,CD14,CD2AP,CD44,CEBPB,CLDN4,CP,CXCL16,F3,FLRT2,IGF1,JUNB,LMNA,NDRG1,NFKBIA,SEMA3C,SFN	100 (24)
Tgf beta		group	Activated	2.551	bias	4.88e-08	CEBPB,CSF1,EDN1,FSTL1,GADD45B,HSPG2,IGF1,JUNB,Ly6a (includes others),PMEPA1,SPARC,TIMP2,TIMP3	96 (20)
APP		other	Activated	2.56	bias	5.13e-08	ACTG1,CD44,CP,CSF1,DSTN,EDN1,GPM6B,HLA-E,HSP90AA1,HSPB1,HSPG2,IGF1,IL6ST,ITGA3,JUNB,JUND,Ly6a (includes others),RNF213,RTP4,SDC4,SIRPA,Tpm1,ZFP36L1	89 (14)
OGA		enzyme		0.839		5.93e-08	ACTG1,CD14,CD44,CD47,CEBPB,CLDN7,CXCL16,DCLK1,ELF1,IGF1,IGFBP7,IL6ST,S100A6,TIMP2,TIMP3
nitrofurantoin		chemical drug		1.744		8e-08	ACTG1,ANXA2,BTG2,CP,IFRD1,IGF1,KRT19,NFKBIA,S100A10,TIMP3
vancomycin		biologic drug	Activated	2.813	bias	8.28e-08	ANXA2,BIRC3,CD14,CD44,CLDN4,CP,S100A10,Tpm1
ID2		transcription regulator		1.134		8.93e-08	BCL3,BTG2,CD44,CEBPB,CSF1,GADD45B,IFNGR1,ITGA3,KLF6,LTB,RELB
MRTFB		transcription regulator	Activated	2.184	bias	9.47e-08	ACTG1,ANKRD1,CRIM1,EDN1,F11R,HLA-A,LMNA,MYH9,PGLYRP1,SH3D19	13 (3)
IGF1	0.231	growth factor	Activated	2.934	bias	1.11e-07	BIRC3,BTG2,CD44,CEBPB,CSF1,DCLK1,EDN1,F3,IGF1,ITGA3,JUNB,KLF6,Ly6a (includes others),NFKBIA,SFN,ZFP36L1	89 (19)
HOXD10		transcription regulator		-1.134		1.16e-07	CD44,EZR,Gm12854/S100a11,ITGA3,PDZK1IP1,RHOC,TIMP2
E. coli B5 lipopolysaccharide		chemical - endogenous non-mammalian	Activated	2.892	bias	1.31e-07	B2M,BCL3,BIRC2,BIRC3,CD44,F3,HLA-A,IL6ST,JUNB,NFKBIA,PAH,TGFB3	72 (16)
Akt		group		1.269	bias	1.33e-07	ANKRD1,BCAM,BIRC2,BTG2,CD44,CEBPB,CP,F3,GPM6B,HSPG2,IGF1,LMNA,NDRG1,NFKBIA	86 (16)
cycloheximide		chemical reagent		1.759		1.33e-07	B2M,BIRC3,BTG2,CD44,CEBPB,CSF1,EDN1,GADD45B,IGF1,JUNB,JUND,KLF5,NFKBIA,RELB	95 (15)
MYD88		other	Activated	3.098	bias	1.42e-07	ALDH1A1,APOBEC3B,BCL3,CD14,CD44,HLA-A,IGF1,ISG15,NFKB2,NFKBIA,RELB,SLCO3A1	64 (14)
nitric oxide		chemical - endogenous mammalian		0.99	bias	1.46e-07	BIRC2,CD44,EDN1,HSP90AA1,HSPG2,JUNB,NDRG1,SFN,TIMP2,TIMP3	88 (17)
trichostatin A		chemical drug	Activated	2.296		1.47e-07	ANKRD1,B2M,CD14,CD44,DSG2,ELF1,EZR,F3,JUND,LMNA,NDRG1,NFKB2,NFKBIA,PAH,RASSF3,RELB,S100A10,SEMA3C,TIMP2,TIMP3,YWHAH	95 (18)
AR		ligand-dependent nuclear receptor		1.447	bias	1.59e-07	ALDH1A1,ANKRD1,CEBPB,DSG2,EDN1,FXYD3,IGF1,Ly6a (includes others),NDRG1,PMEPA1,RASSF3,SLCO3A1,TACC2,TIMP2,TIMP3,TMEM176B	85 (19)
tributyrin		chemical drug	Activated	2.63	bias	1.61e-07	BIRC3,EDN1,MYL12A,NDRG1,NFKB2,SAMD4A,TUFT1
PSMB9		peptidase				1.66e-07	HLA-A,NFKB2,NFKBIA,RELB	71 (8)
ETV5		transcription regulator				1.75e-07	AHNAK,CLDN4,CLDN7,CTNNA1,KRT19,KRT7,S100A6,TIMP3
phenacetin		chemical drug	Activated	2.449	bias	2.08e-07	ANXA2,BIRC3,CD44,CLDN4,CP,S100A10	62 (4)
CSF3		cytokine	Activated	2.155	bias	2.44e-07	BIRC3,CD14,CD44,CEBPB,EDN1,GADD45B,IGF1,LTB,Ly6a (includes others),PLSCR1	79 (19)
U0126		chemical - kinase inhibitor		-0.713	bias	2.51e-07	BIRC3,CD44,CEBPB,CLDN4,EDN1,F3,GADD45B,ITGA3,JUNB,JUND,KLF5,SIRPA,TGFB3,TIMP2,TIMP3,TSC22D3	84 (18)
carbon tetrachloride		chemical toxicant	Activated	2.264	bias	2.61e-07	DCLK1,GADD45B,HSP90AA1,HSPB1,IGF1,JUNB,JUND,PTP4A1,S100A6,TIMP2,TIMP3	94 (18)
N4BP1		other		-1.214		2.76e-07	HLA-A,JUNB,NFKB2,RELB	46 (7)
cyclosporin A		biologic drug		0.758	bias	2.84e-07	ANXA2,BIRC3,CD14,CD44,CLDN4,CP,EDN1,F3,HSP90AA1,IFNGR1,NFKBIA,S100A10,SYT7,Tpm1,YWHAH	89 (20)
RC3H1		enzyme	Inhibited	-2.449	bias	2.95e-07	APOBEC3B,CD44,EDN1,HSPB1,IL6ST,ISG15,PLSCR1	37 (5)
CCN2		growth factor		1.572	bias	3.43e-07	BIRC2,CD44,IGF1,PTGFR,SDC4,SPARC,TIMP3,Tpm1	23 (3)
MAP2K1		kinase				4.13e-07	ANKRD1,BIRC2,BIRC3,CD44,CRIM1,CRYAB,F3,JUND,NFKBIA,SIRPA	84 (20)
IFNA4		cytokine	Activated	2.382	bias	4.16e-07	Bst2,HLA-E,ISG15,Ly6a (includes others),PMEPA1,SLCO3A1
TREM1		transmembrane receptor	Activated	2.538	bias	4.33e-07	CD14,CEBPB,CSF1,EDN1,F3,GADD45B,ISG15,NFKB2,NFKBIA,PGLYRP1	84 (14)
KLF4		transcription regulator	Activated	2.29	bias	4.43e-07	ALDH1A1,CD14,CD44,CLDN7,EFEMP1,HSPB1,KLF5,KRT19,KRT7,Oasl2,TGFB3,WLS	24 (3)
OSM		cytokine	Activated	2.967	bias	4.45e-07	ANXA2,ANXA3,B2M,BCL3,CLDN4,F3,HLA-A,IFNGR1,IL6ST,JUNB,KRT19,PDPN,PDZK1IP1,PTP4A1,TAPBP,TIMP3	28 (3)
EIF2AK3		kinase		1.991	bias	4.53e-07	BIRC2,BIRC3,BTG2,CEBPB,IGF1,NDRG1,NFKB2,RELB	82 (14)
TRIM24		transcription regulator	Inhibited	-2.828	bias	4.85e-07	Bst2,Gm12854/S100a11,IFNGR1,ISG15,Ly6a (includes others),PLEC,RTP4,SAMD9L	36 (7)
LTBR		transmembrane receptor		1.342	bias	5.36e-07	DSG2,GPM6B,MFGE8,NFKB2,NFKBIA,PDPN
2-bromoethylamine		chemical reagent	Activated	2.433	bias	5.36e-07	ANXA2,CD14,CD44,CLDN4,CP,S100A10
IL6		cytokine	Activated	3.468	bias	5.76e-07	AHNAK,BCL3,BTG2,CD14,CD44,CEBPB,CP,CRYAB,CSF1,F3,GADD45B,HLA-A,IGF1,IL6ST,JUNB,JUND,KRT18,NFKBIA,PTGFR	94 (13)
PNPT1		enzyme	Inhibited	-2.449	bias	6.06e-07	Bst2,ISG15,Oasl2,RNF213,RTP4,SAMD9L
thapsigargin		chemical toxicant		1.007	bias	6.49e-07	BIRC2,BIRC3,CEBPB,CLDN4,CP,EDN1,GADD45B,IGF1,NFKBIA,SFN	86 (15)
HNF1B		transcription regulator		-0.707		9.28e-07	CD44,CLDN7,F11R,ITGA3,PDZK1IP1,S100A6,SEMA3C,SPARC
TNFSF11		cytokine	Activated	3.072	bias	9.78e-07	CD14,CD44,F3,GADD45B,IFRD1,IGF1,JUNB,NFKB2,NFKBIA,RELB,SDC4	67 (13)
CEBPA		transcription regulator		1.373	bias	9.88e-07	BTG2,CD14,CEBPB,CSF1,CTNNA1,IGF1,ISG15,JUNB,KLF5,KRT7,Ly6a (includes others),PTGFR,SFTPD,TSC22D3	21 (2)
mycophenolic acid		chemical drug	Activated	2.018	bias	1e-06	BIRC3,EDN1,KRT19,MYL12A,NFKB2,SAMD4A,TUFT1
LLGL2		other	Activated	2.236	bias	1.01e-06	ANKRD1,CRIM1,FSTL1,NDRG1,SH2D4A
captopril		chemical drug		0.896	bias	1.09e-06	CD44,CP,CSRP2,F3,S100A10,TGFB3,Tpm1	42 (6)
NKX2-3		transcription regulator		-1.919		1.13e-06	CRYAB,CXCL16,DCLK1,EDN1,FLRT2,LY6E,PLSCR1,RNF213,RTP4,SAMD9L
ESR2		ligand-dependent nuclear receptor		-0.051		1.16e-06	CLDN4,CRIM1,CXCL16,EDN1,GADD45B,IGF1,JUNB,KRT19,LMNA,NDRG1,NFKB2,NFKBIA,PLEC,PTGFR,TIMP2	95 (19)
FGF10		growth factor	Activated	2.425	bias	1.2e-06	AHNAK,ANXA2,ANXA3,CEBPB,S100A6,TIMP3
hexachlorobenzene		chemical toxicant	Activated	2.449	bias	1.34e-06	ANXA2,CD14,CD44,CP,S100A10,Tpm1
BCL6		transcription regulator		-1.195	bias	1.44e-06	BCL3,CD44,CSF1,ITGA3,JUNB,KLF6,LMNA,Ly6a (includes others),SH2D4A,SH3D19	62 (10)
raloxifene		chemical drug		-0.452		1.44e-06	ANXA3,BCL3,CSF1,IGF1,KLF6,KRT7,NDRG1,TGFB3,TIMP3	33 (5)
Immunoglobulin		complex		1.676		1.52e-06	BCL3,BIRC3,CD14,CD44,CSF1,CXCL16,F3,HLA-A,Ly6a (includes others),NFKB2,NFKBIA,PDLIM4,PLSCR1,RELB,SIRPA,TSC22D3,WLS	91 (17)
BMP7		growth factor	Activated	2.391	bias	1.58e-06	CAMK2N1,CD44,CEBPB,EDN1,F11R,F3,IGF1,NDRG1,TGFB3	87 (18)
NCF1		enzyme		1.982	bias	1.66e-06	CD14,CD44,EDN1,F3,IGF1	96 (20)
hydrogen peroxide		chemical - endogenous mammalian	Activated	2.722	bias	1.82e-06	ANKRD1,ANXA2,BIRC3,BTG2,CLDN7,CRYAB,CSF1,DDAH2,EDN1,EZR,GADD45B,ITGA3,NAD+,PAH,SPARC	45 (7)
R5020		chemical reagent		1.633	bias	1.83e-06	BIRC3,BTG2,CEBPB,F3,NAD+,NFKBIA,TIMP2	92 (16)
MRTFA		transcription regulator	Activated	2.184		1.9e-06	ACTG1,ANKRD1,COMT,EDN1,F11R,HLA-A,LMNA,MYH9,PGLYRP1	34 (5)
DNASE2		enzyme				1.94e-06	CP,ISG15,Ly6a (includes others),Oasl2,RTP4
4-hydroxytamoxifen		chemical drug		1.609	bias	2.08e-06	CEBPB,CLDN4,EDN1,EFEMP1,IGF1,JUNB,KRT19,NFKBIA,TUFT1	93 (13)
KLF2		transcription regulator		-0.861		2.18e-06	BCL3,CD44,EDN1,F3,JUNB,NDRG1,NFKBIA,PDPN,SFTPD	83 (11)
SP1		transcription regulator		1.755	bias	2.51e-06	CEBPB,CRYAB,EZR,F3,IFNGR1,IGF1,KLF6,KRT18,KRT19,LTB,NDRG1,NFKBIA,SPARC,TIMP2,TIMP3	84 (13)
simvastatin		chemical drug		0.294		2.55e-06	ANXA3,CD14,EDN1,F3,Ly6a (includes others),NFKBIA,PGLYRP1,S100A6,SDC4,Tpm1	64 (12)
SIRT1		transcription regulator		-0.927	bias	2.65e-06	BIRC3,CEBPB,DDAH2,HLA-A,IGF1,LY6E,Oasl2,RELB,RNF213,RTP4,SCX,TIMP2,TIMP3	66 (7)
calcitriol		chemical drug		-0.292		3.17e-06	ANXA2,BCL3,BIRC2,CD14,CEBPB,COMT,CSF1,EDN1,F3,IGF1,ISG15,Ly6a (includes others),NFKBIA,PMEPA1,PTGFR	85 (18)
HGF		growth factor	Activated	2.04	bias	3.36e-06	BIRC2,BIRC3,CD44,CRYAB,CSF1,EDN1,F3,IGF1,IL6ST,ISG15,KRT18,KRT19,TIMP3,YWHAH	85 (17)
ethionine		chemical toxicant	Activated	2.219	bias	3.92e-06	CD14,CD44,CP,S100A10,Tpm1
CG		complex	Activated	3.269	bias	4.09e-06	B2M,BTG2,CEBPB,EFEMP1,HLA-A,IGF1,JUNB,Oasl2,PTGFR,S100A10,S100A6,SDC4	72 (16)
ETV6-RUNX1		fusion gene/product		-1.644	bias	4.29e-06	BCL3,Bst2,CD44,DSTN,ISG15,JUND,KLF6,LTB,RELB,TACC2,TSC22D3
IL13		cytokine		-0.26	bias	4.33e-06	BCL3,BIRC2,CD14,CD44,CEBPB,CP,EZR,F3,FXYD3,IFNGR1,IGF1,KLF6,TIMP2	96 (18)
lysophosphatidic acid		chemical - other	Activated	2.57	bias	4.95e-06	ANKRD1,CD14,CSF1,EDN1,F3,JUNB,KLF5	89 (18)
Pdgf (complex)		complex	Activated	2.35	bias	4.95e-06	CD44,EDN1,F3,JUNB,SPARC,TGFB3,TIMP3	92 (20)
JAK1		kinase	Activated	2.236	bias	5.33e-06	BCL3,CD14,HLA-A,IL6ST,JUNB,Oasl2	58 (12)
FAS		transmembrane receptor		-1.628		5.47e-06	ANXA2,BIRC2,BIRC3,CD44,CSF1,F3,JUND,LTB,NFKBIA,PGLYRP1,PLEC,PTP4A1	98 (20)
SUMO2		enzyme	Inhibited	-2.236		5.7e-06	Bst2,CXCL16,ISG15,LY6E,TSC22D3
IFNAR1		transmembrane receptor		0.883	bias	5.78e-06	B2M,CSF1,HLA-A,IFNGR1,ISG15,Ly6a (includes others),Oasl2,RTP4	72 (17)
TGFBR2		kinase		-0.283		5.9e-06	CD14,CD44,CRYAB,DSG2,GADD45B,KRT18,PDPN,SPARC,TGFB3	83 (9)
CREBBP		transcription regulator		0	bias	6.06e-06	B2M,CD44,CRIM1,CSF1,ISG15,JUND,NDRG1,NFKBIA,PDLIM4,RTP4,SDC4,TAPBP	56 (12)
BIRC3	0.071	enzyme				6.06e-06	BIRC3,CSF1,NFKB2,NFKBIA	69 (14)
butyric acid		chemical - endogenous mammalian		-1.076		6.61e-06	ALDH1A1,ANXA2,CD44,CSF1,FSTL1,HSPG2,KLF5,LY6E,NFKB2,NFKBIA,PLSCR1,TIMP3,ZFP36L1	77 (9)
GNA15		enzyme				6.66e-06	CP,CRYAB,HLA-E,PDLIM1,SLC6A6,TGFB3,ZFP36L1
NOTCH1		transcription regulator		0.827		6.73e-06	ANKRD1,BIRC2,BIRC3,CD14,CD44,CEBPB,Ly6a (includes others),NFKB2,RELB,TGFB3	77 (15)
prostaglandin E2		chemical - endogenous mammalian	Activated	2.26	bias	6.85e-06	ANXA2,BIRC3,CD14,CD44,CEBPB,CSF1,IGF1,IGFBP7,LMNA,NFKBIA,TSC22D3	85 (18)
ERBB3		kinase		0.522		7.06e-06	CD47,EZR,F3,FSTL1,NDRG1,SPARC,TIMP3	72 (10)
deferoxamine		chemical drug	Activated	2.181	bias	7.14e-06	ANXA2,CD14,CD47,CP,F3,GADD45B,IGF1,NDRG1,NFKB2	74 (7)
indomethacin		chemical drug		1.793		7.18e-06	ANXA2,BIRC3,BTG2,CD14,CD44,CEBPB,CLDN4,CP,IGF1,S100A10	97 (21)
RELB	0.116	transcription regulator				7.31e-06	B2M,BIRC3,LTB,NFKB2,NFKBIA,RELB	61 (10)
CD44	0.198	other	Activated	2.132	bias	7.41e-06	BCAM,BIRC2,BIRC3,CD44,ITGA3,Ly6a (includes others),NFKB2,PMEPA1,SDC4	77 (14)
STAT3		transcription regulator	Activated	2.885	bias	7.59e-06	ALDH1A1,BCL3,CD44,CEBPB,EDN1,F3,HLA-A,IL6ST,ISG15,JUNB,KLF5,Muc1,NDRG1,NFKB2,PLSCR1	82 (17)
medroxyprogesterone acetate		chemical drug		1.253		7.62e-06	BTG2,CD44,F3,IGFBP7,JUNB,KLF5,LMNA,LTB	106 (18)
RNA polymerase II		complex				7.9e-06	B2M,CD14,CSF1,GADD45B,IFNGR1,IGF1,JUNB,NFKBIA,SFN,TAPBP
TAZ		enzyme		0	bias	7.91e-06	ANKRD1,CAMK2N1,CD44,EDN1,KLF6,SAMD4A,SEMA3C
Nr1h		group		-1.913	bias	7.97e-06	ALDH1A1,BCL3,CSF1,EDN1,LTB,NFKB2,SYT7,TIMP3	53 (11)
S-nitrosoglutathione		chemical toxicant				8.07e-06	BIRC2,BIRC3,IGF1,NFKBIA,S100A10	95 (17)
FN1		enzyme		0.896	bias	8.29e-06	BIRC3,CEBPB,F3,JUND,KRT7,NFKBIA,SDC4,SPARC,TIMP2	89 (16)
HSF1		transcription regulator		-0.064		8.92e-06	B2M,CEBPB,CLDN7,CRYAB,CSRP2,EFEMP1,HSP90AA1,HSPB1,SEMA3C
ZMPSTE24		peptidase		-0.988	bias	9.01e-06	BTG2,GADD45B,IGF1,LMNA,SIRPA
2-mercaptoacetate		chemical drug				9.07e-06	ANXA2,IGF1,MFGE8,S100A10
TWIST1		transcription regulator		-0.478	bias	9.1e-06	ALDH1A1,CD44,CLDN4,LMNA,MFGE8,RELB,RHOC,TIMP3
MAPK9		kinase		1.463	bias	9.1e-06	BIRC3,CEBPB,EDN1,GADD45B,JUNB,JUND,KLF6,LMNA	96 (18)
DYSF		other				9.16e-06	ACTG1,ANKRD1,ANXA2,B2M,HLA-A,HSPB1
CD3		complex	Activated	2.447	bias	1.02e-05	BIRC3,CD44,HSP90AA1,IFNGR1,IGF1,JUNB,Ly6a (includes others),NFKBIA,PLEC,PTP4A1,RELB,RHOC,SEC14L1,SYT7,ZFP36L1	88 (16)
SRF		transcription regulator		1.741	bias	1.04e-05	ACTG1,ANKRD1,CSRP2,DSTN,EZR,HSPG2,IGF1,JUNB,MYH9,PGLYRP1,Tpm1	47 (7)
SMAD3		transcription regulator	Activated	2.393	bias	1.15e-05	ANKRD1,EDN1,GADD45B,JUNB,JUND,Ly6a (includes others),PMEPA1,SPARC,TGFB3,TIMP3	95 (15)
resiquimod		chemical drug				1.29e-05	APOBEC3B,CD44,CEBPB,HSPB1,ISG15,LMNA,NFKB2,NFKBIA,PLSCR1,RELB	79 (13)
MAP3K14		kinase	Activated	2.2	bias	1.31e-05	BIRC3,CD44,LTB,NFKB2,NFKBIA,RELB	54 (11)
GNAQ		enzyme				1.66e-05	ANKRD1,ANXA3,BTG2,CD44,EDN1,PLSCR1,ZFP36L1	55 (10)
CCN5		growth factor		-0.447		1.66e-05	CD44,IGFBP7,KRT18,SDC4,SPARC
2-(4-amino-1-isopropyl-1H-pyrazolo[3,4-d]pyrimidin-3-yl)-1H-indol-5-ol		chemical reagent		1.294		1.7e-05	ANKRD1,CD44,EDN1,IFRD1,KLF5,KLF6,PMEPA1,SDC4
EPAS1		transcription regulator	Activated	2.433	bias	1.78e-05	BIRC3,CDC42EP5,CEBPB,CHMP2B,EDN1,GADD45B,NDRG1,SFTPD,TGFB3
Ni2+		chemical reagent		1.987	bias	1.82e-05	BIRC3,CSF1,LTB,NDRG1
HIF1A		transcription regulator	Activated	2.398	bias	1.82e-05	BIRC2,CD44,CSF1,EDN1,GADD45B,HSPB1,IGF1,KRT18,KRT19,NDRG1,SDC4,TGFB3	88 (16)
maslinic acid		chemical - endogenous non-mammalian				1.82e-05	CD44,CD47,CEBPB,IL6ST,ITGA3,JUNB	52 (7)
WNT1		cytokine		1.914	bias	1.83e-05	EDN1,IGF1,JUNB,KLF5,KRT19,LY6E,SEMA3C	36 (6)
filgrastim		biologic drug		-1.372		1.86e-05	ANXA3,B2M,BIRC3,BTG2,CD44,DDAH2,ISG15,KLF6,PDLIM1,RELB,S100A10,ZFP36L1
CEBPB	0.128	transcription regulator	Activated	2.459	bias	1.9e-05	ALDH1A1,CD14,CEBPB,CP,GLIPR2,HLA-A,HSP90AA1,IGF1,KRT18,PTGFR,SFTPD,TMEM176B	57 (8)
FOSL2		transcription regulator				2.19e-05	CEBPB,F3,Gm12854/S100a11,RELB,SFTPD	31 (5)
TRAF3		enzyme		-1.633		2.34e-05	BIRC3,ISG15,NDRG1,NFKB2,NFKBIA,RELB	53 (11)
ERK		group	Activated	2.157	bias	2.46e-05	BTG2,CLDN4,EDN1,JUNB,KLF5,KRT18,NDRG1,SFN,ZFP36L1	73 (10)
LATS1		kinase		-1.98	bias	2.47e-05	CD14,CLDN4,KRT18,KRT19
SFN	0.114	other		1.98	bias	2.47e-05	BTG2,DSG2,F3,KRT18
S100P		other				2.62e-05	KRT18,KRT19,S100A6
VHL		transcription regulator				2.67e-05	ALDH1A1,CLDN4,F3,LMNA,MYL12B,SPARC,ZFP36L1
TCR		complex		1.185	bias	2.7e-05	BCL3,BIRC3,CD44,GADD45B,IFNGR1,ISG15,JUNB,NFKB2,NFKBIA,RELB,TSC22D3	73 (13)
SYVN1		transporter	Activated	2.646	bias	2.79e-05	CD44,F3,HLA-A,HSPB1,ITGA3,NFKB2,SLC6A6
BRAF		kinase				3.11e-05	BCAM,BIRC2,BIRC3,CEBPB,CSF1,F3,GPM6B,HSPG2	85 (17)
ZBTB16		transcription regulator		-1.133		3.19e-05	CD14,CD44,IFNGR1,IL6ST,Ly6a (includes others),TMEM176B,TSC22D3
NFAT5		transcription regulator	Activated	2.376	bias	3.34e-05	CXCL16,EDN1,F3,IGFBP7,NFKBIA,SLC6A6
EIF2AK2		kinase		0.784	bias	3.34e-05	BIRC2,CEBPB,ISG15,NFKB2,NFKBIA,PLSCR1	77 (13)
IL11		cytokine				3.35e-05	ANXA2,EZR,IGF1,IL6ST,JUNB	55 (6)
BNIP3L		other		0		3.35e-05	CD47,LTB,NFKB2,NFKBIA,TIMP2
CSF2		cytokine	Activated	2.898	bias	3.39e-05	BCL3,BIRC3,CD14,CSF1,EDN1,F3,IFRD1,IGF1,JUNB,LTB,NFKB2,NFKBIA,RELB	79 (15)
Sos		group				3.59e-05	CD44,FLRT2,KLF6,MYH9,PDPN,PMEPA1,SIRPA,Tpm1	77 (4)
TNFRSF8		transmembrane receptor		1.387		3.63e-05	AHNAK,JUNB,NFKB2,PDPN,RELB
phenylbutazone		chemical drug	Activated	2.219	bias	3.63e-05	ANXA2,CD44,CLDN4,CP,S100A10	62 (4)
TLR4		transmembrane receptor	Activated	2.798	bias	3.65e-05	APOBEC3B,CD14,CD44,EDN1,F3,ISG15,NFKB2,NFKBIA,PTGFR,RELB,SLCO3A1	73 (14)
Rps15a-ps4		other				3.73e-05	NFKB2,NFKBIA
KRT18	0.99	other				3.73e-05	KRT18,KRT7
chalcone-24		chemical reagent				3.73e-05	BIRC2,BIRC3
CALCA		other		0	bias	3.74e-05	AHNAK,CD44,EDN1,IGF1,JUNB,LMNA	46 (7)
CXCL12		cytokine	Activated	2.599	bias	3.98e-05	BCL3,CD14,CD44,CD47,IGFBP7,JUNB,Ly6a (includes others),RHOC	80 (11)
tetrachlorodibenzodioxin		chemical toxicant		-0.703		4e-05	CAMK2N1,CEBPB,COMT,EDN1,JUND,KRT19,KRT7,PTGFR,SFN,SLCO3A1,TGFB3	81 (13)
OSMR		transmembrane receptor				4.25e-05	BCL3,BIRC3,IL6ST,JUNB,Oasl2	37 (5)
EIF4E		translation regulator	Activated	2.777	bias	4.42e-05	B2M,BIRC2,Bst2,CEBPB,CXCL16,HLA-A,NFKBIA,TAPBP
Pka		complex		1.912	bias	4.5e-05	CD14,CD44,CEBPB,EDN1,IGF1,JUNB,KLF6	73 (19)
3-deazaneplanocin		chemical drug		1.069	bias	4.59e-05	CEBPB,KLF6,KRT7,TIMP3,TSC22D3
Ige		complex	Activated	2.985	bias	4.63e-05	BCL3,CDC42EP5,CXCL16,EDN1,GADD45B,JUNB,NFKB2,NFKBIA,RELB,Tpm1	93 (16)
daporinad		chemical drug		-1.188	bias	4.81e-05	ALDH1A1,CD44,CEBPB,NAD+
POU5F1		transcription regulator	Activated	2.424	bias	4.86e-05	BIRC2,BIRC3,CLDN7,EFEMP1,KRT18,Oasl2,PMEPA1,SIRPA,TGFB3,WLS	22 (2)
Tnf (family)		group		0.801	bias	4.89e-05	BIRC2,BIRC3,CLDN4,CSF1,F3,IGF1,NFKBIA	84 (16)
GLI1		transcription regulator	Activated	2.63	bias	4.89e-05	CD44,CSF1,EZR,IGF1,IGFBP7,KRT19,LMNA,TIMP3
NOS2		enzyme		1.414		4.89e-05	CD14,CD44,CP,EDN1,ISG15,KLF6,NFKBIA,PLSCR1	85 (16)
TNFSF10		cytokine		0.647		5.18e-05	BIRC2,BIRC3,CD14,HLA-A,ISG15,NFKBIA	86 (15)
IL12 (complex)		complex	Activated	2.605	bias	5.4e-05	BCL3,CD44,CSF1,GADD45B,IFNGR1,ISG15,LTB,Ly6a (includes others)	80 (15)
CYP1A1		enzyme				5.74e-05	ANXA3,IGF1,KRT19,KRT7,LMNA,PTP4A1	79 (7)
erlotinib		chemical drug		1.633	bias	5.74e-05	CD14,F3,IGFBP7,NFKB2,NFKBIA,RELB	47 (7)
PRKAA1		kinase		-0.956	bias	5.74e-05	BIRC3,IGF1,Ly6a (includes others),NAD+,NFKBIA,PMEPA1,ZFP36L1
Pam3-Cys-Ser-Lys4		chemical reagent	Activated	2.219	bias	5.74e-05	CD14,F3,HLA-A,LTB,NFKBIA,RELB,TGFB3	71 (12)
FUS-DDIT3		fusion gene/product		-1	bias	6.1e-05	CAMK2N1,EFEMP1,PLEC,TSC22D3
POLR3G		enzyme				6.16e-05	EZR,KLF6,LMNA
SOD1		enzyme				6.28e-05	B2M,CD14,COMT,CP,CRYAB,EZR,HSPB1,IGF1,JUNB	66 (10)
hydrocortisone		chemical - endogenous mammalian		0.841		6.46e-05	ANKRD1,CEBPB,EZR,GADD45B,IGF1,IGFBP7,NFKBIA	89 (11)
wortmannin		chemical - kinase inhibitor		-1.363	bias	6.55e-05	CD14,CD44,CSF1,CXCL16,EZR,F3,IGF1,NFKBIA	86 (18)
trovafloxacin		chemical drug	Activated	2.236	bias	6.6e-05	B2M,BIRC3,HLA-A,JUNB,NFKBIA	82 (11)
17-alpha-ethinylestradiol		chemical drug		1.912	bias	6.72e-05	BCL3,F3,IGF1,KRT19,KRT7,SFN,TGFB3
black raspberry extract		chemical drug				7.02e-05	AHNAK,ANXA2,CD44,HSP90AA1,KLF5,YWHAH
CD38		enzyme	Activated	2.608	bias	7.25e-05	ANXA2,CD44,GLIPR2,MYADM,NDRG1,PDLIM1,S100A6
Jnk		group	Activated	2.056	bias	7.67e-05	BIRC3,CD44,EDN1,F3,IGF1,JUND,KLF6,PLSCR1	91 (21)
CD40		transmembrane receptor	Activated	2.391	bias	7.91e-05	BIRC3,CD44,CSF1,F3,Ly6a (includes others),NFKB2,NFKBIA,TAPBP	71 (13)
FGF2		growth factor	Activated	2.295	bias	7.93e-05	BTG2,CRYAB,CSF1,F3,IGF1,ITGA3,JUNB,LMNA,S100A10,SPARC,TIMP3	90 (20)
estrogen		chemical drug		1.338	bias	8.19e-05	BCL3,COMT,Ifi27,IGF1,JUNB,SCX,SFTPD,SPARC,TGFB3	76 (7)
STAT4		transcription regulator	Activated	2.8	bias	8.41e-05	ADSS2,AHNAK,BCL3,DDAH2,ISG15,KRT18,NDRG1,TGFB3
IL5		cytokine	Activated	2.985	bias	8.41e-05	ANXA2,BCL3,BIRC2,GLIPR2,LTB,MYADM,NDRG1,PDLIM1,S100A6
WNT3A		cytokine	Activated	2.333	bias	8.41e-05	CD44,CEBPB,DCLK1,EDN1,PMEPA1,SDC4,SPARC,TGFB3,TIMP3	92 (12)
SUMO3		other	Inhibited	-2		8.48e-05	Bst2,CXCL16,ISG15,LY6E
GNA14		enzyme				8.65e-05	ANKRD1,ANXA3,BTG2,KLF6,ZFP36L1
IL1		group	Activated	3.011	bias	9.17e-05	CP,CSF1,EDN1,F3,IGF1,KLF6,RELB,SDC4,SPARC,TGFB3	80 (15)
E. coli B4 lipopolysaccharide		chemical toxicant	Activated	2.46	bias	9.32e-05	ELF1,F3,HLA-A,Ly6a (includes others),NFKBIA,Oasl2,RELB,RHOC,RTP4	21 (3)
DDIT3		transcription regulator		-1.671		9.36e-05	ANKRD1,CAMK2N1,NDRG1,PDPN,PLEC,TSC22D3
androgen		chemical drug		0.447		9.76e-05	BTG2,CD44,IGF1,KLF5,NFKBIA,SDC4,TACC2	77 (9)
bisindolylmaleimide I		chemical - kinase inhibitor	Inhibited	-2.423	bias	9.8e-05	BIRC3,CD44,IGF1,JUND,NFKBIA,TGFB3	87 (21)
APOE		transporter		-0.927	bias	9.8e-05	BCAM,CD44,CSF1,EDN1,F3,HSPG2,IGF1,ITGA3,PMEPA1,SDC4	87 (17)
miR-199a-5p (and other miRNAs w/seed CCAGUGU)		mature microRNA	Inhibited	-2.219	bias	9.84e-05	BCAM,ISG15,ITGA3,MYH9,SAMD9L
EP300		transcription regulator		1.447	bias	9.88e-05	B2M,COMT,CRIM1,EDN1,IGF1,LMNA,NDRG1,NFKBIA,PDLIM4,RTP4,SDC4	72 (9)
cardiotoxin		chemical - other	Activated	2	bias	0.000101	B2M,CSF1,EZR,HSP90AA1,IGF1,IGFBP7,MYH9
cholecalciferol		chemical - endogenous mammalian	Activated	2.172	bias	0.000103	ANXA2,CD14,CEBPB,CSF1,EDN1,IGF1	45 (7)
8-bromoguanosine 3',5'-cyclic monophosphate		chemical - kinase inhibitor		0	bias	0.000104	EDN1,JUNB,S100A10,TGFB3	58 (7)
LATS2		kinase		-1.98		0.000104	CD14,CLDN4,KRT18,KRT19	7 (2)
bucladesine		chemical toxicant		1.62	bias	0.000105	CD14,CD44,CEBPB,CRYAB,F3,GADD45B,IGF1,JUNB,TGFB3,TIMP2	90 (21)
salmonella minnesota R595 lipopolysaccharides		chemical - endogenous non-mammalian	Activated	2.421	bias	0.000107	BCL3,ISG15,JUNB,NFKB2,NFKBIA,RELB	91 (15)
SB-431542		chemical reagent		-1.633	bias	0.000107	CD14,CD44,GADD45B,IGF1,IGFBP7,KRT18	82 (9)
5-azacytidine		chemical drug	Activated	2.425	bias	0.000109	ANXA2,CD44,CTNNA1,F3,KLF6,Ly6a (includes others),PAH
metribolone		chemical reagent	Activated	3.247	bias	0.000111	B2M,CRYAB,EZR,IGF1,KRT18,MYL12B,NDRG1,PMEPA1,TACC2,TIMP2,YWHAH	85 (13)
YARS1		enzyme				0.000111	F3,NFKBIA
FGF7		growth factor	Activated	2.236	bias	0.000112	ADSS2,CD44,CSF1,S100A10,SFTPD
AHR		ligand-dependent nuclear receptor		-1.699		0.000112	BTG2,CAMK2N1,CD14,EDN1,EFEMP1,HSP90AA1,JUNB,TGFB3,TIMP2,TIMP3	105 (21)
REL		transcription regulator				0.000113	B2M,BCL3,F3,GADD45B,HLA-A,NFKB2,NFKBIA,RELB	47 (9)
RNASEH2A		enzyme				0.000115	IFNGR1,ISG15,NFKB2,NFKBIA
RCE1		peptidase				0.000115	B2M,CRYAB,FSTL1,LMNA
HOXA9		transcription regulator				0.000117	ALDH1A1,IGF1,JUNB,KRT18,SDC4,SERINC2,TSC22D3
Ifn		group		1.406	bias	0.000117	B2M,CD44,EDN1,HLA-A,IGF1,ISG15	73 (17)
Gm12602		other				0.000119	BTG2,CRYAB,Tpm1
CP-55940		chemical reagent				0.000126	BTG2,CSF1,JUNB,NFKBIA
ANXA1		enzyme				0.000126	ANXA2,CSF1,TIMP2,TSC22D3
BRCA1		transcription regulator		1.709	bias	0.000134	EZR,FXYD3,GADD45B,HSPB1,Ly6a (includes others),PLSCR1,SFN	42 (3)
VDR		transcription regulator		0.506		0.000134	CD14,CD44,CEBPB,CSF1,EDN1,F3,ISG15,RELB	66 (16)
IL10RA		transmembrane receptor		0.718		0.000135	CSRP2,EDN1,EFEMP1,FSTL1,HLA-A,Ly6a (includes others),RNF213,SPARC,WFDC2
paclitaxel		chemical drug		1.526	bias	0.000135	BIRC3,BTG2,CD44,CD47,GADD45B,HLA-A,ITGA3,JUND,NFKBIA	92 (17)
S100A8		other		1.195	bias	0.000138	ALDH1A1,BCL3,BIRC2,CP,IGF1,ISG15,NFKBIA	89 (17)
IRF2		transcription regulator				0.00014	B2M,CD14,IL6ST,ISG15,MYH9,TAPBP	38 (6)
PPP2R5C		other				0.000144	BCL3,BIRC3,RELB	74 (9)
KLF11		transcription regulator				0.000146	CEBPB,EDN1,ITGA3,TGFB3,TIMP2,TIMP3	62 (7)
FOXO1		transcription regulator		0.478	bias	0.000151	ANXA3,BIRC3,EDN1,GADD45B,IGF1,IGFBP7,ITGA3,JUNB,NAD+,PLSCR1,SFN	17 (2)
IRF4		transcription regulator		-1.408		0.000158	B2M,BIRC3,EZR,ISG15,PLSCR1,YWHAH,ZFP36L1
JUND	0.889	transcription regulator				0.000159	BCL3,CXCL16,F3,JUND,SFTPD	77 (11)
RBM5		other		-1.103	bias	0.000166	BIRC3,BTG2,HSP90AA1,ISG15
PSMB8		peptidase				0.000172	NFKB2,NFKBIA,PTGFR
amlodipine		chemical drug				0.000172	ANXA2,EDN1,S100A10
IL33		cytokine	Activated	2.359	bias	0.000172	BCL3,BIRC3,CXCL16,GADD45B,JUNB,NFKB2,NFKBIA,RELB	88 (18)
rottlerin		chemical toxicant	Inhibited	-2.219	bias	0.000178	APOBEC3B,BIRC3,CLDN4,CLDN7,PLSCR1	65 (7)
EGR1		transcription regulator	Activated	2.174	bias	0.000186	CD44,CSF1,F3,GADD45B,JUNB,JUND,NDRG1	90 (13)
TSC2		other	Inhibited	-2.383	bias	0.000187	ANXA2,CP,CRYAB,HSPB1,S100A6,TMEM176B
LIPE		enzyme				0.000187	ALDH1A1,ANKRD1,CEBPB,CP,EDN1,SDC4
MET		kinase		1.205	bias	0.000187	CD44,EDN1,HSPB1,IGF1,ITGA3,SLCO3A1	52 (8)
CDH1		other		1.109		0.000188	BIRC2,CD44,KRT18,KRT19,KRT7
PPP3CA		phosphatase				0.000188	CRYAB,KRT18,PDPN,PTGFR,SDC4
EZH2		transcription regulator		0.2		0.000188	BIRC3,CTNNA1,EZR,IGF1,LTB,NDRG1,NFKBIA,SFN,TIMP2,TIMP3	62 (4)
resveratrol		chemical drug		-0.315		0.000192	BIRC3,CD14,EDN1,F3,ISG15,JUND,NAD+,NFKBIA,SCX	86 (16)
ITK		kinase		0.937	bias	0.000199	CD44,CRIM1,HLA-A,IFNGR1,Ly6a (includes others)
NR3C2		ligand-dependent nuclear receptor				0.000203	EDN1,IGF1,JUNB,SEMA3C,TACC2,TSC22D3	80 (7)
MAPK14		kinase		1.546	bias	0.000205	ANKRD1,CRYAB,EFEMP1,JUNB,JUND,TIMP2,Tpm1	86 (11)
miR-29b-3p (and other miRNAs w/seed AGCACCA)		mature microRNA	Inhibited	-2.19	bias	0.00021	PLEC,SPARC,TGFB3,Tpm1,ZFP36L1
n-nitrosomethylbenzylamine		chemical toxicant				0.000211	AHNAK,ANXA2,CD44,HSP90AA1,KLF5,YWHAH
IFIH1		enzyme		1.961	bias	0.000213	Bst2,ISG15,Ly6a (includes others),NFKBIA	33 (7)
mibolerone		chemical drug		-1.633	bias	0.000219	AHNAK,F3,HLA-E,IFNGR1,IGF1,TIMP3
FICD		enzyme				0.000222	HSP90AA1,HSPB1
phenylacetic acid		chemical - endogenous mammalian				0.000222	HLA-A,TIMP2
arzoxifene		chemical drug				0.000222	IGF1,TGFB3
methapyrilene		chemical drug		0.816		0.000228	ACTG1,ANXA2,BTG2,CP,IFRD1,IGF1
KITLG		growth factor				0.00023	B2M,CD14,CDC42EP5,CSF1,LY6E,NFKBIA,PLSCR1,TSC22D3	34 (6)
LYN		kinase				0.000233	BCL3,CSF1,NFKB2,NFKBIA,TGFB3	85 (14)
FADD		other		-1.342	bias	0.000233	BIRC3,GADD45B,JUNB,KLF6,LY6E
EML4-ALK		fusion gene/product				0.000238	PTP4A1,SPARC,TGFB3
Ins1		other	Activated	2.353	bias	0.00024	CEBPB,CRYAB,EDN1,IGF1,IL6ST,JUNB,SPARC,TIMP2,TIMP3	91 (19)
NLRX1		other	Inhibited	-2	bias	0.00025	BIRC3,NFKB2,NFKBIA,RELB	88 (14)
CTNNB1		transcription regulator	Activated	2.586	bias	0.000258	ADSS2,ALDH1A1,CD44,CD47,CTNNA1,EDN1,GADD45B,KLF5,KRT7,LMNA,LY6E,MFGE8,SEMA3C,SFN,TGFB3,TIMP3	64 (10)
CXCL8		cytokine		1.4	bias	0.000258	CD44,F3,HSPG2,IFRD1,NFKBIA	89 (13)
ADAM10		peptidase				0.000258	CRYAB,CSF1,CXCL16,DCLK1,IL6ST
TCF		group				0.000258	ALDH1A1,CD44,JUNB,SEMA3C,SFN	17 (2)
TERT		enzyme				0.000265	B2M,EFEMP1,ISG15,KRT19,MFGE8,NFKBIA
TICAM1		other	Activated	2.412	bias	0.000265	APOBEC3B,BCL3,ISG15,NFKB2,NFKBIA,RELB	59 (15)
melatonin		chemical - endogenous mammalian		0.57		0.000275	DDAH2,EDN1,IGF1,JUNB,KRT19,SPARC	84 (18)
NLRC5		transcription regulator				0.000276	B2M,HLA-A,HLA-E
fenretinide		chemical drug		-0.555		0.000285	ANKRD1,BIRC2,IGF1,IGFBP7,NFKBIA	48 (7)
CSF1	0.035	cytokine		1.98	bias	0.000288	CSF1,HLA-A,IFNGR1,IGF1,IL6ST,JUNB,NFKB2,SPARC	83 (17)
NRG1		growth factor	Activated	2.19	bias	0.000295	ANKRD1,CRIM1,EDN1,FSTL1,JUNB,JUND,NDRG1,SH2D4A	87 (16)
ACOX1		enzyme		-0.816		0.000296	ANXA2,IGF1,KLF6,MFGE8,PAH,PLSCR1
triamcinolone acetonide		chemical drug		1.195		0.000312	BTG2,CD44,IL6ST,JUNB,NFKBIA,TACC2,TSC22D3	26 (3)
TBK1		kinase		-0.243	bias	0.000314	APOBEC3B,EDN1,ISG15,Oasl2,SLCO3A1	36 (8)
LY6E	0.979	other				0.000318	CD14,NFKBIA,RELB
Z-LLL-CHO		chemical - protease inhibitor		1.504	bias	0.000324	BIRC3,CEBPB,CLDN4,CRYAB,HSP90AA1,HSPB1,NFKB2,NFKBIA,PTGFR	91 (15)
ASPSCR1-TFE3		fusion gene/product	Activated	2.236	bias	0.00033	CRYAB,EZR,HLA-E,TACC2,VAT1
GFI1		transcription regulator	Inhibited	-2.449	bias	0.00033	BCL3,CSF1,Ly6a (includes others),NFKB2,NFKBIA,RELB	70 (14)
halofuginone		chemical drug				0.00033	CD44,CP,FSTL1,SPARC,TGFB3,TIMP2
LMNB1		other				0.000337	B2M,CRYAB,FSTL1,LMNA
brefeldin A		chemical - endogenous non-mammalian		-0.13		0.000337	CD44,CEBPB,GADD45B,HLA-A	74 (13)
bee venom		chemical - endogenous non-mammalian				0.000346	HSPB1,IFRD1,JUNB,MYH9,NFKBIA
rifampin		chemical drug				0.000354	ALDH1A1,CD14,CRYAB,CSF1,IFRD1,PLEC
carboplatin		chemical drug		1.941	bias	0.000361	CD44,CD47,CLDN4,CP
TFPI2		other				0.000364	BTG2,GADD45B,JUNB
SMAD7		transcription regulator	Inhibited	-2.39	bias	0.000367	BIRC2,EFEMP1,NFKBIA,PMEPA1,TGFB3,TIMP3	45 (7)
Mst/krs		group				0.000368	NFKB2,RELB
PCA3		other				0.000368	NDRG1,PMEPA1
PPARG		ligand-dependent nuclear receptor		0.853	bias	0.000377	CEBPB,EDN1,F11R,Gm12854/S100a11,IGF1,IGFBP7,KLF6,KRT18,KRT19,NDRG1,TSC22D3	90 (16)
EGFR		kinase		0.386	bias	0.000381	BCAM,CD47,CEBPB,CRYAB,DSG2,F3,GPM6B,HSPB1,IGF1,JUNB,JUND,NFKBIA	100 (19)
SAFB		other		-1	bias	0.000387	B2M,HLA-E,IGF1,LTB
IGF1R		transmembrane receptor		1.205	bias	0.000393	ANKRD1,ANXA3,CEBPB,EDN1,IGF1,KRT19,SDC4,TIMP3	88 (19)
YAP1		transcription regulator	Activated	2.401	bias	0.000412	ACTG1,ANKRD1,CRIM1,CSF1,EDN1,LMNA,MYH9,SFN	20 (4)
IGFBP5		other				0.000415	F3,IGF1,SFN	90 (12)
CASP8		peptidase				0.000415	CD14,CD44,CSF1,ISG15	79 (15)
MKNK1		kinase	Activated	2.236	bias	0.000416	ANXA2,CP,IFRD1,ISG15,SPARC
CREM		transcription regulator		1.969		0.000421	BTG2,CEBPB,GADD45B,JUNB,KLF5,Tpm1	52 (7)
PTGER4		G-protein coupled receptor		-0.816		0.000421	CD44,CP,EDN1,RNF213,RTP4,ZFP36L1
RGS2		enzyme	Inhibited	-2.236	bias	0.000435	BTG2,F3,FXYD3,PDLIM1,PDLIM4
cytokine		group		1.673	bias	0.00045	BCL3,CSF1,EDN1,F3,Ly6a (includes others),SPARC	83 (12)
HOXA5		transcription regulator				0.000469	GADD45B,IGF1,TGFB3
ZAP70		kinase	Activated	2	bias	0.000473	HSP90AA1,PLEC,SEC14L1,TSC22D3
CAV1		transmembrane receptor				0.000481	CD14,CLDN7,KRT18,KRT19,KRT7,WFDC2
ANGPT2		growth factor	Activated	2.449	bias	0.000486	CEBPB,COMT,CRYAB,EDN1,HSP90AA1,KLF5,MFGE8	52 (7)
tunicamycin		chemical - endogenous non-mammalian		1.861	bias	0.000486	BIRC2,BIRC3,CEBPB,GADD45B,IFRD1,NDRG1,NFKBIA	87 (16)
IFNB1		cytokine		0.723	bias	0.000504	Bst2,CD14,CRYAB,HLA-A,IFNGR1,ISG15,Oasl2,TIMP2	43 (11)
VCAN		other		0		0.000514	CEBPB,F3,ITGA3,NFKBIA,TGFB3,Tpm1	40 (4)
COMMD1		transporter				0.000528	BIRC3,KRT19,NFKBIA	46 (7)
Ccl2		cytokine		1.982	bias	0.000538	CD14,CSF1,IGF1,SDC4	79 (13)
INHA		growth factor		1.342		0.000541	F11R,ITGA3,KRT18,KRT19,LMNA
ATF3		transcription regulator		-0.714		0.000541	BIRC3,CXCL16,HSPB1,KRT19,NFKB2	71 (10)
PTK2		kinase				0.000572	BIRC2,BIRC3,KRT18,TIMP3	28 (4)
isobutylmethylxanthine		chemical toxicant	Activated	2.169	bias	0.000583	CD14,CD44,CEBPB,ITGA3,JUNB,TIMP2,TIMP3	97 (21)
SATB1		transcription regulator		-0.085		0.000584	ACTG1,CTNNA1,GADD45B,HSP90AA1,RELB,TSC22D3
F2R		G-protein coupled receptor		1.432	bias	0.000588	BIRC2,CD44,F3,IGFBP7,KRT19	87 (16)
bosentan		chemical drug				0.000591	EDN1,EZR,F3	27 (3)
RNY3		other				0.000591	ISG15,LY6E,RTP4
TGM2		enzyme	Activated	2.63	bias	0.000598	BIRC3,BTG2,LY6E,PLSCR1,RNF213,SAMD9L,SIRPA
FOXA2		transcription regulator		1.387	bias	0.000598	BIRC2,CLDN4,EFHD2,IGF1,ITGA3,NFKB2,SFTPD
sunitinib		chemical drug		-0.927	bias	0.000608	CD44,CTNNA1,ITGA3,TIMP2	51 (9)
RHO		G-protein coupled receptor	Inhibited	-2		0.000608	B2M,CD44,CEBPB,S100A6
Mapk		group	Activated	2	bias	0.000613	CEBPB,CLDN4,F3,IGF1,JUNB	99 (20)
testosterone		chemical - endogenous mammalian		0.863	bias	0.000619	ANKRD1,ANXA3,BCL3,IGF1,JUND,NDRG1,NFKB2,NFKBIA,PTP4A1	78 (13)
glucocorticoid		chemical drug		1.034		0.00064	BCL3,CD44,CEBPB,CSF1,EDN1,NFKBIA,PAH,TSC22D3	76 (16)
GPER1		G-protein coupled receptor	Activated	2	bias	0.000645	EDN1,IGF1,NFKBIA,TUFT1
MMP12		peptidase				0.000645	IL6ST,MYH9,NFKBIA,YWHAH
CXCR4		G-protein coupled receptor				0.000645	CD44,F3,IGFBP7,JUNB	89 (16)
miR-335-3p (miRNAs w/seed UUUUCAU)		mature microRNA				0.000659	PLEC,SPARC,Tpm1
mir-142		microRNA				0.000659	DSTN,IL6ST,NFKB2
IRF7		transcription regulator	Activated	2.39	bias	0.000661	ISG15,Ly6a (includes others),Oasl2,PLSCR1,RTP4,SAMD9L	33 (7)
sirolimus		chemical drug		-1.987	bias	0.000669	ADSS2,B2M,BCL3,CEBPB,CSF1,F3,HSP90AA1,ISG15,JUNB,LMNA,PTP4A1,SFN	82 (15)
IL10		cytokine		1.234		0.000678	BCL3,CD14,CD44,CSF1,CXCL16,F3,FLRT2,IL6ST,LTB,TSC22D3	85 (19)
SMARCB1		transcription regulator		1.488	bias	0.000682	CD44,CSF1,DSG2,F11R,PGLYRP1,SPARC
mir-1		microRNA	Inhibited	-2.173	bias	0.000691	ANXA2,CEBPB,EDN1,IGF1,ZFP36L1
diethylnitrosamine		chemical toxicant				0.000691	BIRC2,DCLK1,PAH,PLSCR1,TIMP2
CCR2		G-protein coupled receptor		1.387	bias	0.000719	CSF1,HSPG2,IGF1,SPARC,TIMP2	97 (11)
RUNX1		transcription regulator		0.277	bias	0.00073	ANXA2,BTG2,CSF1,ISG15,Ly6a (includes others),MYH9,Oasl2
crizotinib		chemical drug				0.000732	PTP4A1,SPARC,TGFB3
IER3		other				0.000767	BIRC2,BIRC3	54 (7)
Hmgb2 (includes others)		transcription regulator				0.000767	NFKB2,TGFB3
CHS-828		chemical drug				0.000767	ALDH1A1,CD44
hyaluronic acid		chemical - endogenous mammalian		1.172	bias	0.000778	BCL3,CD44,NFKBIA,RHOC,TIMP2	59 (9)
B2M	0.885	transmembrane receptor				0.00081	HLA-A,HLA-E,TAPBP
MAPK8		kinase		1.698	bias	0.000839	BIRC3,CEBPB,CXCL16,JUND,KLF6,TSC22D3	103 (18)
MYB		transcription regulator		0.391	bias	0.000839	BIRC3,CD14,CXCL16,IGF1,NFKB2,SDC4	57 (7)
TCF4		transcription regulator		0.186	bias	0.000856	DSTN,EDN1,ELF1,Ifi27,ITGA3,Ly6a (includes others),RHOC,SAMD9L,WLS
BCL2L1		other		1		0.000857	BIRC2,CD44,ITGA3,Ly6a (includes others)
COLQ		other		0		0.000857	HSPG2,LTBP4,SDC4,TGFB3
3,3'-diindolylmethane		chemical drug		1.987		0.000857	HLA-A,IFNGR1,KRT19,NFKBIA	6 (2)
RB1		transcription regulator		1.482		0.000861	CD44,EZR,F3,IFNGR1,IGF1,KRT18,NFKB2,NFKBIA,PMEPA1,Tpm1	85 (17)
INS		other		0.864		0.000864	CEBPB,EDN1,F3,IGF1,JUNB,JUND	99 (21)
JQ1		chemical reagent	Inhibited	-2.2	bias	0.000872	BIRC3,ISG15,NFKB2,Oasl2,SH2D4A
MYOD1		transcription regulator				0.000883	ANKRD1,CRYAB,FSTL1,IGF1,JUNB,KLF6,PMEPA1
ADAMTS18		peptidase				0.000892	CLDN4,ITGA3,TGFB3
CNOT7		transcription regulator				0.000892	B2M,ISG15,PLSCR1	31 (6)
miR-145-5p (and other miRNAs w/seed UCCAGUU)		mature microRNA		-1.954	bias	0.000905	AHNAK,F11R,KLF5,KRT7
trans-hydroxytamoxifen		chemical drug	Inhibited	-2.433		0.000915	ANXA3,KLF6,KRT7,LMNA,NDRG1,TGFB3
prednisolone		chemical drug		-0.378	bias	0.000947	BIRC2,BIRC3,EDN1,HSP90AA1,IGF1,MYH9,TSC22D3	80 (8)
methylselenic acid		chemical reagent				0.000947	BIRC2,BIRC3,CAMK2N1,CD44,IGF1,JUNB,NDRG1	77 (11)
IKZF1		transcription regulator		-1.865	bias	0.000969	B2M,IGF1,IL6ST,RNF213,RTP4,SHROOM3,SPPL2A
Ubiquitin		group				0.00098	CRYAB,HSP90AA1,TIMP2
ROR1		kinase				0.00098	FSTL1,KRT19,NDRG1
C1QA		other				0.00098	CD44,F3,S100A10
SIAH2		transcription regulator				0.00098	FXYD3,NDRG1,PMEPA1	61 (5)
HOXC8		transcription regulator				0.00098	ANKRD1,KRT19,Ly6a (includes others)
UXT		transcription regulator				0.00098	KRT18,NFKBIA,PMEPA1
crocidolite asbestos		chemical toxicant				0.00098	CD44,JUNB,JUND	46 (7)
PTH		other		0.874	bias	0.000995	AHNAK,CEBPB,CSF1,IGF1,LMNA,SDC4	58 (9)
RXRB		ligand-dependent nuclear receptor				0.00101	ALDH1A1,CRYAB,FSTL1,IGF1
ZFPM1		transcription regulator				0.00101	CEBPB,IFNGR1,KLF6,SH2D4A
PELP1		other				0.00101	CDC42EP5,MLPH,MYADM,NDRG1,SYT7
bortezomib		chemical drug		-0.736		0.00101	BIRC2,BIRC3,CRYAB,GADD45B,HSP90AA1,IGF1,IL6ST	51 (7)
Vhl		complex				0.00102	BIRC2,BIRC3
CACNA1C		ion channel				0.00102	ANXA2,S100A10
S100A10	0.833	other				0.00102	ANXA2,S100A10
SERPINC1		enzyme				0.00102	F3,HSPG2
miR-138-5p (miRNAs w/seed GCUGGUG)		mature microRNA				0.00102	KRT19,RHOC
DES		other				0.00102	ANKRD1,KRT18
TAPBP	0.436	transporter				0.00102	HLA-A,HLA-E
farnesyl transferase		complex				0.00102	CRYAB,KLF6
DIABLO		other				0.00102	BIRC2,BIRC3
Ca2+		chemical - endogenous mammalian		0.718	bias	0.00102	CEBPB,EDN1,ITGA3,JUNB,JUND,NDRG1,NFKBIA,TIMP2	96 (19)
NKX2-1		transcription regulator				0.00102	CD14,FXYD3,HLA-A,PDPN,PGLYRP1,SFTPD
SOX4		transcription regulator		0.896	bias	0.00105	CTNNA1,DDAH2,Gm12854/S100a11,IGF1,Ly6a (includes others),TMEM176B
KLF3		transcription regulator		-1.414	bias	0.00106	AHNAK,BCL3,CTNNA1,GLIPR2,Ifi27,MYADM,NDRG1,PDLIM1
ARHGAP31		other				0.00107	GADD45B,SPARC,TGFB3
NRXN1		transporter				0.00107	CD47,F11R,FLRT2
SNCA		enzyme		0.277		0.0011	ALDH1A1,Bst2,EZR,IGF1,ISG15,PLSCR1,S100A6,YWHAH
CISH		other	Inhibited	-2	bias	0.00111	CD14,CSF1,EDN1,IFRD1
sulindac sulfide		chemical drug		0.404		0.00111	BCAM,CEBPB,IFRD1,KRT19
GnRH-A		chemical reagent		1.98		0.00111	BTG2,GADD45B,JUNB,KLF6	64 (5)
TP73		transcription regulator		1.281	bias	0.00112	B2M,BIRC2,BTG2,CRYAB,EDN1,KLF5,PDPN,SFN,TIMP3
glutamine		chemical - endogenous mammalian		-0.655		0.00112	ADSS2,CEBPB,JUNB,NFKB2,NFKBIA	77 (11)
NUPR1		transcription regulator		1.265	bias	0.00115	APOBEC3B,CAMK2N1,CEBPB,KLF6,NDRG1,RELB,SAMD4A,SHROOM3,SLC6A6,ZFP36L1
miR-1-3p (and other miRNAs w/seed GGAAUGU)		mature microRNA	Inhibited	-2.429	bias	0.0012	ANXA2,FSTL1,IGF1,SDC4,SH2D4A,TIMP3
LMNA	0.424	other				0.00124	EDN1,JUND,KLF5,KRT18,LMNA,TIMP2,TIMP3
PRKCQ		kinase				0.00128	CD44,EZR,NFKB2	74 (9)
RXRG		ligand-dependent nuclear receptor				0.00128	CRYAB,TIMP2,TIMP3
SU6656		chemical toxicant				0.00128	CSF1,JUNB,ZFP36L1
FGF1		growth factor	Inhibited	-2.236		0.00129	EDN1,LTB,PMEPA1,TGFB3,TIMP3
Il3		cytokine				0.00129	CD14,CSF1,IGF1,Ly6a (includes others)	76 (15)
ITGB3		transmembrane receptor		1.114	bias	0.00129	BIRC2,CSF1,ITGA3,SPARC
NEK7		kinase				0.0013	EDN1,ISG15
TPM3		other				0.0013	IGF1,ITGA3
PI3		other				0.0013	CEBPB,NFKBIA
PSAP		enzyme				0.0013	BIRC2,BIRC3
EIF3A		other				0.0013	ISG15,NDRG1
DEK		transcription regulator				0.0013	BIRC3,NFKBIA
raltitrexed		chemical drug				0.0013	ANXA2,FXYD3
Mek		group		-1.184	bias	0.00133	BCAM,CRYAB,F3,GPM6B,HSPB1,JUNB,SEMA3C,Tpm1	81 (13)
ATM		kinase				0.00136	BIRC2,GADD45B,HSP90AA1,NAD+
IFI16		transcription regulator		0.762	bias	0.00136	EDN1,ISG15,NFKBIA,SFTPD
FOSL1		transcription regulator				0.00136	CD44,JUNB,SFTPD,SPARC	37 (4)
PAX3		transcription regulator				0.00137	F3,HSPG2,NFKB2,PTP4A1,SFN,TIMP3	73 (7)
FOXO3		transcription regulator		1.219		0.00138	ANXA3,GADD45B,IGF1,IGFBP7,JUNB,NAD+,NDRG1,NFKBIA	78 (10)
miR-338-3p (miRNAs w/seed CCAGCAU)		mature microRNA				0.00139	PLEC,SPARC,Tpm1
NCSTN		peptidase				0.00139	CD14,CEBPB,Ly6a (includes others)	65 (6)
MARK2		kinase				0.00139	CD44,IGF1,SLCO3A1
NLRP12		other				0.00139	BCL3,HLA-A,HLA-E
VTN		other				0.00139	F3,S100A10,SFN
PIK3CA		kinase				0.00142	CD14,CD44,CEBPB,SPARC	47 (7)
silibinin		chemical drug				0.00142	CD44,KRT18,NFKBIA,TIMP2	35 (6)
PLX5622		chemical drug	Activated	2	bias	0.00142	B2M,CSF1,IL6ST,LTB
IL3		cytokine		1.342	bias	0.00145	BIRC3,BTG2,CD14,CSF1,GADD45B,HLA-A,JUNB,PDPN	83 (17)
GATA6		transcription regulator		0.739		0.00148	BCAM,EDN1,KRT7,MYH9,SEMA3C,SPARC
PD173074		chemical reagent		1	bias	0.00149	CEBPB,F3,KRT7,LTB
EWSR1-FLI1		fusion gene/product		-1.969	bias	0.00149	EDN1,F11R,MYH9,SH3D19
asoprisnil		chemical drug				0.0015	IGF1,SFN,TGFB3
TIMP1		cytokine				0.0015	CD44,TIMP2,TIMP3
IFN alpha/beta		group		1.199	bias	0.00156	CXCL16,HLA-A,Ly6a (includes others),LY6E	59 (7)
PLG		peptidase		1.969	bias	0.00156	CSF1,EDN1,F3,MFGE8	82 (15)
Y 27632		chemical drug		-1	bias	0.00156	ACTG1,CD44,CEBPB,Tpm1
SPP1		cytokine		0.824	bias	0.0016	CD44,IGF1,ITGA3,KRT18,S100A6,VAT1	91 (14)
nitrofen		chemical toxicant				0.00162	TGFB3,TIMP2,TIMP3
MMP2		peptidase				0.00162	CD44,IL6ST,ITGA3	65 (4)
PARP14		enzyme				0.00162	F3,ISG15
Sox2ot		other				0.00162	ALDH1A1,CD44
SPRY4-IT1		other				0.00162	CLDN7,F11R
IL9R		transmembrane receptor				0.00162	BCL3,JUNB	17 (3)
USP19		peptidase				0.00162	BIRC2,BIRC3
Igkv1-117		other				0.00162	JUNB,RELB
RP 73401		chemical toxicant				0.00162	BTG2,CEBPB
aplidine		biologic drug				0.00162	JUNB,JUND	37 (4)
CST5		other		-1.195	bias	0.00163	AHNAK,ANXA2,ANXA3,CD44,CLDN7,EZR,SYT7
ELAVL1		other	Activated	2.219	bias	0.00168	B2M,Bst2,HLA-A,Ifi27,NFKBIA,TSC22D3
MACROH2A1		other	Inhibited	-2	bias	0.00171	ANXA2,EDN1,LTB,SPARC
NRAS		enzyme		-1.455	bias	0.00172	ANKRD1,B2M,HLA-A,Ifi27,ISG15,SCX
miR-30c-5p (and other miRNAs w/seed GUAAACA)		mature microRNA	Inhibited	-2.224	bias	0.00173	IFRD1,KRT7,PLEC,SPARC,Tpm1
NSUN6		enzyme				0.00175	CRIM1,FSTL1,NDRG1
TFAP4		transcription regulator				0.00175	CD44,CLDN4,CLDN7
PRKCE		kinase	Activated	2	bias	0.00178	BIRC3,CEBPB,IL6ST,JUNB	82 (18)
TRAF2		enzyme		1.103		0.00178	BIRC2,BIRC3,Muc1,NDRG1	43 (8)
FBXO32		enzyme		0		0.00178	CSRP2,ITGA3,KLF5,KRT19
SP110		transcription regulator		-1.342		0.00179	BCL3,F3,LMNA,MYH9,PLSCR1
NFATC2		transcription regulator		1.633	bias	0.00181	CRYAB,EDN1,ISG15,NFKBIA,RELB,SLCO3A1	67 (10)
IRF8		transcription regulator		0.747	bias	0.00184	B2M,CD14,CXCL16,ISG15,KLF6	85 (15)
1,2-dithiol-3-thione		chemical reagent		1.648	bias	0.00185	ACTG1,DSTN,HSP90AA1,LMNA,LY6E,Tpm1
TGFA		growth factor		1.982	bias	0.00186	BIRC3,CEBPB,JUNB,S100A10	74 (13)
5-O-mycolyl-beta-araf-(1->2)-5-O-mycolyl-alpha-araf-(1->1')-glycerol		chemical - endogenous non-mammalian	Activated	2	bias	0.00186	BCL3,CD44,NFKB2,SDC4	62 (9)
EPHB1		kinase				0.00198	IL6ST,JUNB
MSI2		other				0.00198	CLDN7,IL6ST
NRBP2		kinase				0.00198	ANXA2,KRT19
STAT5B		transcription regulator		0.928		0.00199	AHNAK,ANKRD1,BIRC3,GADD45B,IGF1,KRT19,LTB	47 (7)
mercuric chloride		chemical toxicant				0.00202	HSP90AA1,HSPB1,JUNB
PP2/AG1879 tyrosine kinase inhibitor		chemical - kinase inhibitor		-1.982	bias	0.00211	BIRC3,CXCL16,EDN1,RHOC	56 (10)
IKBKE		kinase		0.283	bias	0.00211	BIRC2,BIRC3,HLA-A,NFKBIA	83 (16)
NFYA		transcription regulator				0.00211	GADD45B,IGF1,JUNB,JUND
ERG		transcription regulator				0.00214	BIRC3,DSTN,NDRG1,SPARC,Tpm1,TSC22D3
TCF3		transcription regulator				0.00216	DSTN,GADD45B,Ifi27,JUND,KLF6,Ly6a (includes others),SAMD9L,SCX
ICMT		enzyme				0.00217	CRYAB,FSTL1,LMNA
mir-29		microRNA		-1.987	bias	0.0022	IGF1,TIMP3,Tpm1,ZFP36L1
homocysteine		chemical - endogenous mammalian		1.103	bias	0.0022	ANXA2,DDAH2,F3,NDRG1
TLR7		transmembrane receptor	Activated	2.208	bias	0.00224	CD44,CEBPB,ISG15,JUNB,MLPH,NFKBIA	62 (14)
DMD		other				0.00224	ACTG1,ANKRD1,BTG2,IGF1,KRT18,S100A10
BMP2		growth factor		1.815	bias	0.00224	CSF1,F3,GADD45B,JUNB,SPARC,TIMP3	93 (15)
RAF1		kinase	Activated	2.236	bias	0.00234	ANKRD1,CD44,CRYAB,HSPB1,PLEC,Tpm1	72 (8)
SOX2-OT		other				0.00236	ALDH1A1,CD44
STAT1/3/5 dimer		complex				0.00236	BCL3,TIMP3
UBA1		enzyme				0.00236	BIRC2,BIRC3
3,4,5,3',4'-pentachlorobiphenyl		chemical toxicant		0.105	bias	0.00239	CD44,COMT,PTGFR,SLCO3A1
NCOA1		transcription regulator		0.152	bias	0.00248	BTG2,IGF1,JUNB,Muc1,NFKBIA	79 (7)
ACVR1		kinase				0.00248	CSRP2,FSTL1,SAMD9L
SKIL		transcription regulator				0.00248	PLSCR1,Tpm1,VAT1
fasudil		chemical drug				0.00248	CD14,F3,TGFB3
P38 MAPK		group	Activated	2.396	bias	0.00254	CD44,CEBPB,EDN1,F3,JUNB,KLF5,TIMP2,TIMP3	85 (19)
PIK3R1		kinase		-0.594	bias	0.00259	CD44,F3,ISG15,TGFB3	63 (12)
amphetamine		chemical drug				0.00259	CD47,EZR,F3,JUNB	66 (10)
26s Proteasome		complex	Activated	2.219	bias	0.00262	BCL3,BIRC2,BIRC3,JUNB,NFKB2	83 (15)
LIF		cytokine		0.558		0.00262	AHNAK,CEBPB,IGF1,IL6ST,JUNB,TMEM176B	62 (9)
PAX3-FOXO1		fusion gene/product		0		0.00268	BTG2,CSF1,HSP90AA1,IL6ST,KLF5,TIMP2
NCOA3		transcription regulator		1.987	bias	0.00269	ANKRD1,IGF1,Muc1,NFKBIA	72 (7)
SNAI1		transcription regulator		-0.068		0.0027	ANKRD1,CLDN4,CLDN7,KRT18,SPARC
ciprofibrate		chemical drug		0.243		0.0027	ANXA2,IGF1,NFKBIA,PAH,PLSCR1	10 (2)
EPO		cytokine				0.0027	B2M,BCL3,EDN1,JUNB,LY6E,NFKBIA,TSC22D3	47 (7)
FRS2		other				0.00278	CD44,Ly6a (includes others)
6-aminopyrazolopyrimidine derivative compound II		chemical - kinase inhibitor				0.00278	ISG15,Oasl2	23 (5)
gambogic acid		chemical - endogenous non-mammalian				0.00278	BIRC2,BIRC3
SMAD1		transcription regulator				0.00282	BTG2,CSF1,GADD45B
FASLG		cytokine				0.00282	BIRC2,CD44,TGFB3	46 (7)
stallimycin		biologic drug				0.00282	CSF1,F3,ISG15
SLC13A1		transporter		0		0.0029	ACTG1,ALDH1A1,HSPB1,IGF1
dehydroisoandrosterone		chemical - endogenous mammalian				0.0029	B2M,IGF1,NFKBIA,PTP4A1
AKT1		kinase	Activated	2.595	bias	0.00296	ANKRD1,BIRC3,CD44,EZR,FSTL1,JUND,NFKB2	84 (18)
CREB1		transcription regulator	Activated	2.233	bias	0.00296	BTG2,CEBPB,CRIM1,CSRP2,EDN1,GADD45B,HLA-A,JUNB,KLF5,SERINC2	50 (8)
XDH		enzyme				0.003	CEBPB,F3,TIMP2	66 (16)
AG490		chemical - kinase inhibitor		-1.974	bias	0.00301	BIRC3,EDN1,IGF1,S100A10	70 (12)
MAPK1		kinase		-0.956		0.00302	HLA-E,IGFBP7,ISG15,JUNB,JUND,LMNA,PLSCR1,TACC2
miR-146a-5p (and other miRNAs w/seed GAGAACU)		mature microRNA		-1.982	bias	0.00313	LTB,NFKBIA,PGLYRP1,SFTPD
AGTR1		G-protein coupled receptor				0.00318	CP,EDN1,TGFB3
STOX1		other				0.00323	ACTG1,GADD45B
DANCR		other				0.00323	TIMP2,TIMP3	10 (2)
PSMB10		peptidase				0.00323	NFKB2,NFKBIA	41 (7)
COL9A1		other				0.00323	HSPG2,MFGE8
DRD1		G-protein coupled receptor				0.00323	JUNB,S100A10
KRT8		other				0.00323	KRT18,KRT19
noscapine		chemical drug				0.00323	BIRC2,BIRC3
NCOR1		transcription regulator				0.00324	BCL3,FXYD3,NDRG1,PMEPA1	61 (4)
PC-SPES		chemical drug				0.00324	B2M,CTNNA1,DSTN,HSP90AA1
H89		chemical - kinase inhibitor	Inhibited	-2.201	bias	0.00326	ADSS2,CD14,CEBPB,IGF1,NFKBIA	78 (17)
okadaic acid		chemical toxicant		1.982	bias	0.00336	ELF1,JUNB,JUND,NDRG1
PAF1		other				0.00338	BIRC3,ISG15,SDC4
ITGA5		transmembrane receptor				0.00338	CD44,CEBPB,JUNB	73 (17)
IL11RA		transmembrane receptor				0.00338	JUNB,KLF5,Muc1	36 (6)
IRF9		transcription regulator				0.00338	ISG15,Oasl2,RTP4	42 (9)
levodopa		chemical - endogenous mammalian		0.044		0.00347	COMT,F11R,GADD45B,HLA-A,JUNB,KLF6,LMNA,Oasl2,S100A10,SEC14L1,VAT1
NQO1		enzyme				0.00357	BIRC2,BIRC3,NAD+
Hdac		group		0		0.00371	EDN1,GADD45B,IGF1,KLF6,SEMA3C	102 (15)
1'-acetoxychavicol acetate		chemical reagent				0.00371	BIRC2,BIRC3
NSD1		transcription regulator				0.00371	KLF6,ZFP36L1
pentobarbital		chemical drug				0.00371	JUNB,JUND
KT5823		chemical - kinase inhibitor				0.00371	EDN1,S100A10
Nfat (family)		group	Activated	2	bias	0.00374	KLF6,RELB,SAMD4A,SDC4
TFAP2A		transcription regulator				0.00374	BIRC3,DCLK1,EFEMP1,Ly6a (includes others)
CEBPD		transcription regulator		1.959	bias	0.00374	CD14,CEBPB,IGF1,SFTPD	51 (7)
PLK1		kinase				0.00378	ANKRD1,SFN,TGFB3
D-galactosamine		chemical - endogenous mammalian				0.00378	CD14,JUNB,JUND	51 (7)
IFNA2		cytokine	Activated	2.427	bias	0.00399	B2M,HLA-A,HLA-E,ISG15,LY6E,PLSCR1	34 (7)
TNFAIP3		enzyme				0.00399	BIRC3,CSF1,NFKBIA	80 (13)
ADRA1A		G-protein coupled receptor				0.00399	CEBPB,CSRP2,IL6ST	17 (3)
ADRA1D		G-protein coupled receptor				0.00399	CEBPB,CSRP2,IL6ST
Salmonella enterica serotype abortus equi lipopolysaccharide		chemical toxicant	Activated	2.236	bias	0.004	BIRC3,EDN1,F3,GADD45B,ISG15	65 (7)
uric acid		chemical - endogenous mammalian				0.004	ISG15,NFKB2,RELB,TACC2	45 (7)
valproic acid		chemical drug		0.842		0.00416	CD44,EDN1,ELF1,GADD45B,JUND,PDZK1IP1,SEMA3C,TSC22D3,YWHAH	97 (14)
S100A9		other		0.447	bias	0.0042	ALDH1A1,BCL3,CP,IGF1,ISG15	39 (4)
kainic acid		chemical toxicant	Activated	2.186	bias	0.0042	BTG2,CEBPB,GADD45B,JUNB,JUND	92 (16)
bromodeoxyuridine		chemical drug				0.00422	CSF1,F3,ISG15
epothilone B		chemical drug				0.00423	BTG2,SFN
lonafarnib		chemical drug				0.00423	BIRC2,BIRC3
GC-GCR dimer		complex				0.00423	NFKBIA,TSC22D3
SAMHD1		enzyme				0.00423	NFKB2,NFKBIA
STK3		kinase				0.00423	PDPN,SFTPD	6 (2)
BCL10		transcription regulator				0.00423	CD44,NFKB2	41 (8)
PSEN1		peptidase				0.00425	ACTG1,DSTN,GADD45B,GPM6B,HLA-E,HSP90AA1,IGF1,Tpm1	65 (4)
fluticasone propionate		chemical drug		1.342		0.00431	GADD45B,MFGE8,SDC4,TIMP3,TSC22D3
SMAD4		transcription regulator		1.066	bias	0.00432	CLDN7,CSF1,EDN1,GADD45B,NFKBIA,TIMP3	79 (15)
Growth hormone		group		1.708	bias	0.0044	CEBPB,COMT,IGF1,JUNB,NFKBIA,TGFB3	89 (20)
CD24		other				0.00442	APOBEC3B,PTP4A1,RELB,TUFT1
CGA		other				0.00442	BIRC2,SCX,TIMP2,TIMP3
CD5		transmembrane receptor				0.00444	BCL3,CEBPB,RELB	46 (7)
verapamil		chemical drug				0.00444	ANXA2,S100A10,S100A6
2,3,4,7,8-pentachlorodibenzofuran		chemical toxicant				0.00444	CD44,COMT,PTGFR
CX3CR1		G-protein coupled receptor		1	bias	0.00452	CD14,CRYAB,IGF1,MFGE8,TUFT1
genistein		chemical drug		-1.769		0.00457	BCL3,CD44,F3,HLA-A,IGF1,JUNB,JUND,TGFB3	79 (16)
CCND1		transcription regulator		0		0.0046	AHNAK,CD44,HSPB1,PAH,PDLIM4,PMEPA1,TGFB3
oblimersen		biologic drug				0.00468	GADD45B,IFRD1,ISG15
zVAD-FMK		chemical - protease inhibitor				0.00468	BIRC2,BIRC3,IL6ST	55 (7)
5-N-ethylcarboxamido adenosine		chemical reagent		-1		0.00472	BCL3,BTG2,JUNB,KLF6	52 (7)
glycochenodeoxycholate		chemical - endogenous mammalian				0.00477	BIRC2,BIRC3
FZD9		G-protein coupled receptor				0.00477	ISG15,Oasl2
IGFBP1		other				0.00477	CEBPB,IGF1	75 (9)
DNAJB6		transcription regulator				0.00477	KRT18,SPARC
GFAP		other				0.00477	CD44,PLEC
glutamyl-Se-methylselenocysteine		chemical - endogenous mammalian				0.00477	TIMP2,TIMP3
LEP		growth factor		0.218	bias	0.00478	CD14,CEBPB,EDN1,F3,IGF1,JUNB,JUND,SPARC,TIMP3	101 (23)
PIK3CG		kinase		-1.131		0.00487	APOBEC3B,B2M,CD47,HLA-A
8-chlorophenylthio-adenosine 3',5'-cyclic monophosphate		chemical - kinase inhibitor				0.00492	BIRC3,CEBPB,IGF1	98 (21)
MAP3K1		kinase				0.00492	BIRC2,BIRC3,HSPB1	46 (7)
FOXO4		transcription regulator		0.152		0.00503	ANXA3,GADD45B,IGFBP7,NAD+
NCOA2		transcription regulator		1.981	bias	0.00503	ISG15,KRT19,NFKBIA,TSC22D3
CLEC4G		other				0.00517	CSF1,MFGE8,TGFB3
NCOR2		transcription regulator				0.00517	BIRC3,IGF1,RELB
NS-398		chemical reagent				0.00519	BTG2,CEBPB,F3,IGF1	78 (12)
ADCYAP1		other		0		0.00522	BCAM,BTG2,CEBPB,NFKBIA,S100A10,SPARC	73 (8)
PML		transcription regulator		0.447		0.00533	ACTG1,HSPB1,ISG15,NDRG1,PLSCR1	37 (5)
VGLL3		other				0.00535	ANKRD1,GADD45B
PAEP		other				0.00535	CXCL16,EDN1
S1PR3		G-protein coupled receptor				0.00535	CD44,IGF1	77 (12)
PARP9		enzyme				0.00535	HLA-E,ISG15
indirubin		chemical drug				0.00535	BIRC2,BIRC3
NAD+	0.09	chemical - endogenous mammalian				0.00535	ANKRD1,NAD+
trichloroethylene		chemical toxicant				0.00543	CD47,MFGE8,SPARC
ADRA1B		G-protein coupled receptor				0.00543	CEBPB,CSRP2,IL6ST	17 (3)
benzene		chemical toxicant				0.00543	CD47,MFGE8,SPARC
bicuculline		chemical - endogenous non-mammalian				0.00543	BTG2,GADD45B,JUNB
SYK		kinase		-0.141		0.00552	BIRC3,CD44,EDN1,TSC22D3	59 (11)
let-7a-5p (and other miRNAs w/seed GAGGUAG)		mature microRNA	Inhibited	-2.214	bias	0.00558	IFRD1,KRT19,PLEC,SPARC,Tpm1
fish oils		chemical drug				0.0057	CEBPB,EDN1,KLF5	36 (5)
diphtheria toxin		chemical - endogenous non-mammalian				0.00587	BCL3,Gm12854/S100a11,RELB,S100A10
RHOJ		enzyme				0.00595	ACTG1,MYH9
TNFRSF13C		transmembrane receptor				0.00595	NFKB2,RELB	42 (9)
ZBP1		other				0.00595	ISG15,NFKBIA
BIRC2	0.198	enzyme				0.00595	BIRC3,CSF1	51 (7)
MNT		transcription regulator				0.00595	GADD45B,KLF6
TBXT		transcription regulator				0.00595	CD44,ITGA3
ACTB	0.991	other				0.00595	ACTG1,DSTN
batimastat		chemical - protease inhibitor				0.00595	CEBPB,SDC4
PS-1145		chemical - kinase inhibitor				0.00595	BIRC2,NFKBIA
STAT2		transcription regulator				0.00597	ISG15,Oasl2,RTP4	34 (6)
dalfampridine		chemical drug				0.00597	BTG2,GADD45B,JUNB
TGFB2	0.514	growth factor		1.044	bias	0.00604	ALDH1A1,EDN1,HSPG2,TIMP2	64 (7)
bovine testicular hyaluronidase		biologic drug				0.00613	CD44
Gm26504		other				0.00613	IGF1
SNORD21		other				0.00613	HLA-A
Lamin b		group				0.00613	LMNA
MACROD1		enzyme				0.00613	NFKBIA
CCDC22		other				0.00613	BIRC3
CYTL1		cytokine				0.00613	IGF1
MLLT11		other				0.00613	CD44
CLK1		kinase				0.00613	F3
ELSPBP1		other				0.00613	ADSS2
PFKP		kinase				0.00613	F3
DSC2		other				0.00613	CD44
lymphokine		group				0.00613	F3
Lectin		group				0.00613	F3
SGTA		other				0.00613	IGF1
recombinant interferon alpha		biologic drug				0.00613	RNF213
CLK4		kinase				0.00613	F3
mir-1301		microRNA				0.00613	KLF6
NAPRT		enzyme				0.00613	NAD+
CAMK2		group				0.00613	BIRC3
EPSTI1		other				0.00613	NFKBIA
NXF3		transporter				0.00613	TGFB3
PDPN	0.064	other				0.00613	CD44
holothurian glycosaminoglycan		chemical - endogenous non-mammalian				0.00613	F3
INHBE		growth factor				0.00613	JUNB
CDKL2		kinase				0.00613	CD44
SRRM1		other				0.00613	CD44
NMNAT3		enzyme				0.00613	NAD+
SR11256		chemical reagent				0.00613	EDN1
KH-CB19		chemical - kinase inhibitor				0.00613	F3
anti-miR-29a inhibitor		chemical reagent				0.00613	TIMP3
KRT7-AS		other				0.00613	KRT7
bathophenanthroline		chemical reagent				0.00613	CP
H/K/NRAS		group				0.00613	KLF5
synthetic peptide		chemical reagent				0.00613	SPARC
2-nitrophenyl EGTA		chemical reagent				0.00613	AHNAK
2-hydroxynicotinic acid		chemical - endogenous mammalian				0.00613	NAD+
2-chloro-dATP		chemical - endogenous mammalian				0.00613	NAD+
glycan		chemical - other				0.00613	F3
gestodene		chemical drug				0.00613	TGFB3
BTK		kinase		1.123		0.00623	CEBPB,ISG15,NFKB2,RELB	80 (14)
POR		enzyme				0.00624	ACTG1,ALDH1A1,GADD45B,HLA-A,SDC4
IRF1		transcription regulator		1.925	bias	0.00624	B2M,CXCL16,ISG15,LTB,TAPBP	74 (13)
cadmium chloride		chemical toxicant				0.00625	HSP90AA1,HSPB1,TGFB3
carrageenan		chemical drug				0.00625	JUNB,JUND,NFKBIA	51 (7)
IL15		cytokine		1.96	bias	0.0064	CD44,CEBPB,CSF1,EDN1,JUNB,NFKBIA,PTP4A1,ZFP36L1	88 (17)
CCKBR		G-protein coupled receptor				0.00659	KRT19,SPARC
FCGR1A		transmembrane receptor				0.00659	CSF1,F3	41 (6)
HRG		other				0.00659	SPARC,TIMP3
diethylmaleate		chemical toxicant				0.00659	BIRC2,NFKBIA
vitamin K2		chemical drug				0.00659	CD14,CSF1
IL17A		cytokine		1.404	bias	0.00659	BCL3,CD14,CEBPB,ISG15,PTGFR,TIMP2	84 (16)
mir-155		microRNA		-1.922	bias	0.0066	ANXA2,CD47,CEBPB,EDN1
CDKN1A		kinase		0.152	bias	0.00671	BIRC2,CD44,CRYAB,IFNGR1,KRT18,NFKBIA	77 (11)
Calmodulin		group				0.00684	CD44,F3,KLF5
cigarette smoke		chemical toxicant		0.895	bias	0.00694	HSP90AA1,IGF1,Muc1,NFKBIA,Oasl2,PTP4A1
ATF4		transcription regulator	Activated	2.164	bias	0.00694	ANKRD1,CEBPB,EDN1,IGFBP7,NDRG1	37 (5)
LEPR		transmembrane receptor				0.00694	EDN1,GADD45B,IGF1,TIMP3,TSC22D3	91 (17)
L-methionine		chemical - endogenous mammalian				0.00714	F3,GADD45B,NFKBIA
IL25		cytokine				0.00714	BTG2,F11R,ZFP36L1
napabucasin		chemical drug				0.00714	ALDH1A1,B2M,CD44
interferon beta-1a		biologic drug				0.00718	BIRC2,GADD45B,LTB,NFKBIA
11,12-epoxyeicosatrienoic acid		chemical - endogenous mammalian				0.00725	CD44,NFKBIA	71 (7)
TIMP2	0.768	other				0.00725	NFKBIA,TIMP2
SMARCD3		transcription regulator				0.00725	CD44,ITGA3
TREX1		enzyme				0.00725	ISG15,Ly6a (includes others)
SIN3B		transcription regulator				0.00725	GADD45B,KLF6
SCX	0.104	transcription regulator				0.00725	SCX,TIMP3
PD 169316		chemical - kinase inhibitor				0.00725	BIRC3,TIMP3
RARA		ligand-dependent nuclear receptor		-1		0.00737	ALDH1A1,CD14,CD44,CEBPB,CP,RTP4,TAPBP	88 (9)
platelet activating factor		chemical - endogenous mammalian				0.00745	F3,NFKBIA,TIMP2	79 (12)
SNAI2		transcription regulator				0.00745	ANKRD1,ITGA3,KRT18
IL6ST	0.276	transmembrane receptor				0.00745	CD44,JUNB,Muc1	55 (10)
STUB1		enzyme				0.00745	HSP90AA1,JUNB,NFKB2
cyclic AMP		chemical - endogenous mammalian	Activated	2.156	bias	0.00769	CEBPB,CRYAB,F3,IGF1,JUNB,PAH	82 (18)
HTT		transcription regulator				0.00769	B2M,BCL3,BIRC2,CEBPB,CRYAB,JUNB,KLF5,NAD+,PDLIM4,SIRPA,TIMP3	88 (15)
pirinixic acid		chemical toxicant		1.546	bias	0.00774	ANXA2,F3,GADD45B,HLA-E,HSP90AA1,HSPB1,JUNB,NFKBIA	67 (10)
THRB		ligand-dependent nuclear receptor				0.00782	BCL3,BIRC3,BTG2,FSTL1,Oasl2,SH2D4A
lactacystin		chemical - protease inhibitor		0.97	bias	0.00787	CRYAB,HLA-A,HSPB1,IFRD1,NFKBIA	39 (4)
prostaglandin A1		chemical - endogenous non-mammalian				0.00794	CD14,NFKBIA
Fibrinogen		complex				0.00794	BCL3,F3
salinosporamide A		chemical drug				0.00794	BIRC2,BIRC3
cis-urocanic acid		chemical drug				0.00794	CRYAB,GADD45B
SALL4		transcription regulator				0.00794	CD44,KRT19
EIF4G2		translation regulator				0.00794	KLF5,KRT19
miR-199a-3p (and other miRNAs w/seed CAGUAGU)		mature microRNA				0.00794	CD44,CEBPB
HDAC7		transcription regulator				0.00794	CD44,EDN1
S1PR1		G-protein coupled receptor				0.00794	IGF1,JUNB	65 (10)
silicon dioxide		chemical drug				0.00794	JUNB,SFTPD
selenomethylselenocysteine		chemical - endogenous mammalian				0.00794	TIMP2,TIMP3
vorinostat		chemical drug		-0.808		0.00795	BIRC2,BIRC3,EDN1,MFGE8,NDRG1,NFKBIA	80 (13)
RUNX3		transcription regulator		-0.762	bias	0.00802	CRIM1,FSTL1,IL6ST,TIMP2
CLDN7	0.87	other		0.152		0.00802	ANXA3,F3,IGFBP7,TIMP2
SOX7		transcription regulator				0.0081	HSPG2,KRT7,MFGE8
cytarabine		chemical drug				0.0081	HLA-A,LTB,TGFB3	46 (7)
EGLN1		enzyme				0.00844	EDN1,SDC4,TGFB3	79 (10)
methylmercury		chemical toxicant				0.00844	CD47,MFGE8,SPARC
hydroxyurea		chemical drug				0.00844	BCAM,EDN1,KRT18
NR4A1		ligand-dependent nuclear receptor				0.00862	CSF1,KRT18,Ly6a (includes others),LY6E,NFKBIA,TGFB3	71 (7)
branched chain amino acids		chemical drug				0.00867	BIRC2,TIMP2
Fibrin		complex				0.00867	F3,KRT18
FAM3B		cytokine				0.00867	KRT19,SPARC
IL15RA		transmembrane receptor				0.00867	CD44,EDN1	49 (6)
CYP2J2		enzyme				0.00867	CD44,NFKBIA	71 (7)
MIF		cytokine		1.974	bias	0.00868	CD44,CEBPB,CXCL16,IL6ST	62 (13)
eicosapentenoic acid		chemical drug		1.131		0.00868	CD44,CEBPB,IGF1,TGFB3	91 (17)
GATA4		transcription regulator		1.452	bias	0.0087	ADSS2,ANKRD1,EDN1,KRT7,MYH9
LDB1		transcription regulator		-0.816		0.00876	CLDN4,COMT,MFGE8,NDRG1,Oasl2,PLSCR1
DOCK8		other				0.00878	EDN1,ISG15,SLCO3A1
SPDEF		transcription regulator				0.00878	BIRC3,CLDN7,ITGA3
SMARCA2		transcription regulator				0.00878	CD44,CP,TUFT1
LMO2		transcription regulator		-0.816		0.00891	CLDN4,COMT,MFGE8,NDRG1,Oasl2,PLSCR1
ARNT2		transcription regulator	Activated	2.236	bias	0.00905	HLA-A,PDLIM4,SYT7,TSC22D3,ZFP36L1
infliximab		biologic drug				0.00914	EDN1,NFKB2,NFKBIA	84 (12)
Igm		complex				0.00914	CD44,NFKB2,ZFP36L1	71 (11)
Collagen type I (complex)		complex				0.00914	ITGA3,S100A10,TIMP2	73 (7)
Pro-inflammatory Cytokine		group				0.00914	CD47,F3,SDC4
TRAF6		enzyme				0.00914	BIRC3,CXCL16,RELB	83 (16)
DKK1		growth factor				0.00914	CD44,KRT18,SPARC
Map3k7		kinase				0.00914	EDN1,ISG15,NFKBIA	52 (9)
miR-34a-5p (and other miRNAs w/seed GGCAGUG)		mature microRNA	Inhibited	-2	bias	0.00915	CD47,EFEMP1,SAMD9L,SLCO3A1
metformin		chemical drug		-0.447		0.00923	CEBPB,F3,GADD45B,IGF1,NFKBIA	98 (20)
WNT5A		cytokine				0.00939	CD14,CRYAB,Ly6a (includes others),SPARC
mir-223		microRNA	Activated	2		0.00939	CSF1,IGF1,Ly6a (includes others),S100A6
cocaine		chemical drug	Activated	2.19	bias	0.00941	GADD45B,JUNB,KLF5,NFKB2,Tpm1	28 (4)
zerumbone		chemical - endogenous non-mammalian				0.00942	BIRC2,BIRC3	61 (4)
GRHL2		transcription regulator				0.00942	CLDN4,SEMA3C
HOXA13		transcription regulator				0.00942	ALDH1A1,SHROOM3
SAFB2		other				0.00942	B2M,HLA-E
TGFB1I1		transcription regulator				0.00942	KRT18,KRT19
TERF2IP		other				0.00942	Ifi27,NFKBIA
W7		chemical reagent				0.00942	BIRC3,CD14
Ro41-5253		chemical reagent				0.00942	F3,IFNGR1	71 (6)
pilocarpine		chemical drug				0.00942	EDN1,JUNB	54 (8)
evodiamine		chemical - endogenous non-mammalian				0.00942	BIRC2,BIRC3
poly dA-dT		chemical reagent				0.00942	ISG15,NFKBIA
CDK4/6		group				0.0095	AHNAK,HSPB1,PDLIM4
Raf		group				0.0095	EDN1,KRT18,SEMA3C
NFATC3		transcription regulator				0.0095	EDN1,F3,SFTPD	74 (7)
FBXW7		enzyme				0.0095	HSPB1,KLF5,NFKB2
SASH1		other				0.0095	EDN1,ISG15,SLCO3A1
bromobenzene		chemical toxicant				0.0095	HSP90AA1,HSPB1,JUND
etoposide		chemical drug	Activated	2.213	bias	0.00959	BIRC2,BIRC3,NFKB2,RELB,SFN	83 (15)
PTGS2		enzyme				0.00959	ANXA2,BIRC3,CD44,EZR,IGF1	85 (19)
PPARA		ligand-dependent nuclear receptor		-0.311	bias	0.00996	ANXA2,CEBPB,EDN1,F11R,HLA-E,NFKBIA,PAH,SERINC2	28 (3)
MAPT		other				0.0101	ACTG1,DSTN,GPM6B,HSP90AA1,NFKB2,PLEC,Tpm1
2-aminopurine		chemical reagent				0.0102	IGF1,ISG15
PARPBP		other				0.0102	KRT18,KRT7
SIRT2		transcription regulator				0.0102	ISG15,Oasl2
STK4		kinase				0.0102	PDPN,SFTPD
WWOX		enzyme				0.0102	ITGA3,TIMP2
PLAU		peptidase				0.0102	F3,IGF1,RELB
SOX1		transcription regulator				0.0102	EFEMP1,Oasl2,WLS
TRAF3IP2		other				0.0102	CSF1,CXCL16,ISG15
SIM1		transcription regulator	Activated	2.236	bias	0.0104	HLA-A,PDLIM4,SYT7,TSC22D3,ZFP36L1
IL1RN		cytokine		-1.067	bias	0.0104	CD44,IGF1,KLF6,RTP4
LGALS1		other				0.0106	CXCL16,F3,IFNGR1
CX3CL1		cytokine				0.0106	CSF1,IGF1,MFGE8,TGFB3
SP3		transcription regulator				0.0107	CD2AP,F3,IGF1,SPARC,TIMP2
plumbagin		chemical toxicant				0.011	BIRC2,BIRC3
CaMKII		complex				0.011	BIRC3,CD44
NADPH oxidase		complex				0.011	EDN1,F3
SLC9A3R1		other				0.011	EZR,KRT19
BDKRB2		G-protein coupled receptor				0.011	CD44,EDN1
SPRY1		other				0.011	IGF1,ISG15
NOX1		enzyme				0.011	F3,NFKBIA
TAF4B		transcription regulator				0.011	NFKBIA,TGFB3
K-252		chemical drug				0.011	CD14,NDRG1
immethridine		chemical reagent				0.011	CD14,CD44
tosylphenylalanyl chloromethyl ketone		chemical - protease inhibitor				0.011	BIRC2,BIRC3
finasteride		chemical drug				0.011	EDN1,TGFB3
diosgenin		chemical - endogenous non-mammalian				0.011	EDN1,F3
MEF2D		transcription regulator				0.011	JUNB,JUND,TGFB3
CASR		G-protein coupled receptor		1	bias	0.0112	CD44,CSF1,EDN1,ISG15
TET2		enzyme	Activated	2	bias	0.0114	AHNAK,ANXA2,BCL3,SEC14L1
ITGB1		transmembrane receptor	Inhibited	-2		0.0114	HSPG2,ITGA3,JUNB,TIMP2
phytohemagglutinin		chemical drug	Activated	2.236	bias	0.0117	BCL3,CD44,CD47,CSF1,HSP90AA1,TIMP3
HAND1		transcription regulator				0.0118	ADSS2,EDN1
MAP2K6		kinase				0.0118	CRYAB,ISG15,RELB
tyrphostin AG 1478		chemical - kinase inhibitor				0.0118	EDN1,F3,S100A10
rosiglitazone		chemical drug		0	bias	0.0119	CSF1,F3,IGF1,ITGA3,KRT18,Muc1,SEMA3C,TGFB3
ethanol		chemical - endogenous mammalian		1.478	bias	0.0119	CD14,CEBPB,EDN1,HLA-A,KLF6,TGFB3,TIMP2,TSC22D3
PS-K		chemical drug				0.0122	BIRC2
gentamicin C1		chemical drug				0.0122	CD44
Tap		complex				0.0122	HLA-E
Pdgfra-Pdgfrb		complex				0.0122	CSF1
macimorelin		biologic drug				0.0122	EDN1
polytef		chemical reagent				0.0122	F3
LEPROT		other				0.0122	IGF1
MBNL3		other				0.0122	CD44
EIF4B		translation regulator				0.0122	ISG15
FAM168A		other				0.0122	NFKBIA
ADRM1		other				0.0122	NFKBIA
LEPROTL1		other				0.0122	IGF1
MEX3C		other				0.0122	IGF1
TRIB2		kinase				0.0122	CEBPB
ADGRG1		G-protein coupled receptor				0.0122	IGF1
TPH2		enzyme				0.0122	IGF1
lauroylcarnitine		chemical - endogenous mammalian				0.0122	CLDN4
VANGL2		other				0.0122	SDC4
ZNF366		transcription regulator				0.0122	TSC22D3
SENP5		peptidase				0.0122	BIRC2
Raet1a		other				0.0122	HLA-A
PROTEASE		group				0.0122	F3
AP1M1		transporter				0.0122	HLA-A
HOMER3		other				0.0122	CEBPB
CELA1		peptidase				0.0122	HLA-A
DPP10-AS1		other				0.0122	TIMP3
IGFALS		other				0.0122	IGF1
miR-296-3p (miRNAs w/seed AGGGUUG)		mature microRNA				0.0122	JUNB
mir-663		microRNA				0.0122	HSPG2
miR-1195 (miRNAs w/seed GAGUUCG)		mature microRNA				0.0122	IGF1
PCBD1		transcription regulator				0.0122	PAH
Raet1d/Raet1e		other				0.0122	HLA-A
POLDIP3		other				0.0122	ISG15
cobimetinib		chemical drug				0.0122	CD44
RBM3		other				0.0122	CD44
Hsf4		transcription regulator				0.0122	CRYAB
NOCT		transcription regulator				0.0122	IGF1
troxerutin		chemical drug				0.0122	CEBPB
Nmnat3		enzyme				0.0122	NAD+
COPS6		other				0.0122	SFN
nitroaspirin		chemical drug				0.0122	F3
canertinib		chemical drug				0.0122	F3
sarpogrelate		chemical drug				0.0122	F3
methiothepin		chemical drug				0.0122	F3
2,5-dihydroxymethylcinnamate		chemical - kinase inhibitor				0.0122	EDN1
bivalirudin		biologic drug				0.0122	F3
(S)-flurbiprofen		chemical drug				0.0122	JUNB
oxazepam		chemical drug				0.0122	GADD45B
AGI-1095		chemical reagent				0.0122	F3
lavendustin A		chemical - kinase inhibitor				0.0122	EDN1
Alocasia cucullata root extract		chemical reagent				0.0122	CD14
anhydrovitamin A		chemical reagent				0.0122	NAD+
lanreotide		biologic drug				0.0122	IGF1
endomorphin-2		chemical - endogenous mammalian				0.0122	EDN1
KT 5926		chemical - kinase inhibitor				0.0122	CD14
NADP		chemical - endogenous mammalian				0.0122	F3
BCR (complex)		complex				0.0123	CD44,JUNB,NFKB2,S100A10
arachidonic acid		chemical - endogenous mammalian		0.293	bias	0.0123	EDN1,F3,KLF6,NFKBIA
ADORA2A		G-protein coupled receptor		-1		0.0126	DSTN,NFKBIA,SPARC,TSC22D3
PI3K (complex)		complex	Activated	2.2	bias	0.0126	BIRC3,CD44,CEBPB,IGF1,NFKB2,NFKBIA
budesonide		chemical drug				0.0127	PDLIM1,RHOC,TSC22D3
romidepsin		biologic drug				0.0127	BIRC2,RHOC,TIMP3
Pde4		group				0.0127	CD14,KRT18
CLDN6		other				0.0127	CLDN4,CLDN7
VCP		enzyme				0.0127	LMNA,NFKB2
carvedilol		chemical drug				0.0127	F3,TIMP2
rifaximin		chemical drug				0.0127	HSP90AA1,NDRG1
progestin		chemical drug				0.0127	NFKBIA,TIMP2
ritonavir		chemical drug				0.0128	CRYAB,IFRD1,PLEC,TSC22D3
oleic acid		chemical - endogenous mammalian		-0.577	bias	0.0128	EDN1,GADD45B,IGF1,NFKBIA
2-amino-5-phosphonovaleric acid		chemical - other		-1.951		0.0128	GADD45B,IFRD1,JUNB,RELB
benzo(a)pyrene		chemical toxicant				0.0129	COMT,HSPB1,IGF1,PDLIM1,RHOC
ZEB1		transcription regulator				0.0131	ALDH1A1,KRT18,KRT19
SOX3		transcription regulator				0.0131	EFEMP1,Oasl2,WLS
cyclophosphamide		chemical drug				0.0131	CD44,CP,Ly6a (includes others)
IFN Beta		group		1.944	bias	0.0131	CEBPB,HLA-A,ISG15,TAPBP
IL27		cytokine				0.0131	B2M,CD14,HLA-A,HLA-E
CDX2		transcription regulator				0.0131	EZR,FXYD3,KLF5,Muc1
VEGFA		growth factor		1.669	bias	0.0134	CLDN7,EDN1,F3,JUNB,LMNA,SPARC
Pkc(s)		group		1.598	bias	0.0136	EDN1,F3,GADD45B,JUNB,KLF6
atorvastatin		chemical drug		-0.555		0.0136	EDN1,F3,GADD45B,JUNB,TGFB3
dinoprost		chemical - endogenous mammalian				0.0136	EDN1,PTGFR,TIMP3
rotenone		chemical toxicant				0.0136	BIRC3,CLDN7,TIMP2
choline fenofibrate		chemical drug				0.0136	F3,NFKBIA
SFTPD	0.075	other				0.0136	CD14,SFTPD
NMU		other				0.0136	BTG2,ZFP36L1
antimycin A		chemical - endogenous non-mammalian				0.0136	NAD+,TIMP2
LDLR		transporter				0.014	Bst2,CD47,F3,HSPG2,MFGE8
vitamin E		chemical drug				0.0145	CD44,F3,KLF6
GMNN		transcription regulator				0.0145	EFEMP1,Oasl2,WLS
ROCK1		kinase				0.0145	CD44,EDN1
troglitazone		chemical drug		1.016		0.0145	ANXA2,BIRC3,CRYAB,IFRD1,NDRG1,NFKBIA,PLEC
FSH		complex		-0.277	bias	0.0149	BTG2,EZR,ITGA3,JUNB,KRT18,PTP4A1,TIMP2
linoleic acid		chemical - endogenous mammalian				0.0149	CD47,EDN1,NFKBIA
PRNP		other				0.0149	CD44,HSPB1,NFKBIA
phenylephrine		chemical drug				0.0149	ANKRD1,EDN1,NAD+
NR1H3		ligand-dependent nuclear receptor				0.015	Bst2,CD47,CXCL16,MFGE8,NFKBIA
ADRB		group		1.067		0.015	ANKRD1,CRYAB,JUNB,NFKBIA
RBPJ		transcription regulator		-1.964	bias	0.015	CD44,CSF1,IGF1,TGFB3
MAP3K8		kinase				0.0153	BIRC3,FAM107B,IFNGR1,JUNB
SRSF1		other				0.0154	KLF6,LMNA
PTX3		other				0.0154	F3,IGF1
ARRB1		other				0.0154	F3,JUNB
MECOM		transcription regulator				0.0154	Ly6a (includes others),SPARC
AZGP1		transporter				0.0154	CEBPB,KRT19
stearic acid		chemical - endogenous mammalian				0.0154	EDN1,NFKBIA
ATG7		enzyme				0.0154	CD44,NFKBIA,PDLIM1
25-hydroxycholesterol		chemical reagent				0.0154	JUNB,JUND,NFKBIA
IFNL1		cytokine				0.0159	ISG15,PLSCR1,RTP4
collagenase		group				0.0164	CEBPB,JUNB
UTP		chemical - endogenous mammalian				0.0164	CD14,F3
ELF3		transcription regulator				0.0164	CLDN7,TIMP3
RPSA		translation regulator				0.0164	ISG15,RELB
TAB1		enzyme				0.0164	BIRC3,NFKBIA
arsenic		chemical toxicant				0.0164	BIRC3,HSP90AA1
CCN1		other				0.0164	IL6ST,ITGA3,TIMP2
INSR		kinase				0.0165	ANKRD1,EDN1,IGF1,JUNB,NDRG1,NFKB2,TGFB3
D-glucose		chemical - endogenous mammalian		1.683	bias	0.0166	ANXA3,CEBPB,EDN1,HSPB1,IGF1,IL6ST,JUNB,RELB,TGFB3,Tpm1
IRF5		transcription regulator				0.0169	ISG15,Oasl2,PLSCR1
HLX		transcription regulator				0.0174	ANKRD1,CD44
PRKCI		kinase				0.0174	CLDN4,EZR
amino acids		chemical - endogenous mammalian				0.0174	IGF1,JUNB
linolenic acid		chemical - endogenous mammalian				0.0174	EDN1,NFKBIA
nitroarginine		chemical reagent				0.0174	CD44,JUND
MAX		transcription regulator				0.0174	EDN1,GADD45B,KLF6
TLR9		transmembrane receptor		1.314	bias	0.0176	CSF1,EDN1,GADD45B,ISG15,Oasl2
lenalidomide		chemical drug		0.869		0.0182	ACTG1,CEBPB,CTTNBP2,RNF213,RTP4
TO-901317		chemical reagent				0.0182	COMT,IGF1,NFKBIA,PGLYRP1,TIMP3
AMOT		other				0.0183	ANKRD1
ixabepilone		chemical drug				0.0183	BIRC2
Gα12/13		group				0.0183	IGF1
EPB42		transporter				0.0183	CD47
ARF4		enzyme				0.0183	CLDN4
PSMD14		peptidase				0.0183	BCL3
ITGBL1		other				0.0183	CD44
AMOTL1		other				0.0183	ANKRD1
OSR2		transcription regulator				0.0183	TGFB3
KLHL21		other				0.0183	NFKBIA
CNDP2		peptidase				0.0183	CD44
Ap1 gamma		group				0.0183	HLA-A
defibrotide		biologic drug				0.0183	F3
botulinum toxin type A		biologic drug				0.0183	SCX
Raet1b		other				0.0183	HLA-A
PLEC	0.364	other				0.0183	KRT18
NAB1		transcription regulator				0.0183	IFNGR1
cyproconazole		chemical drug				0.0183	GADD45B
H60a		other				0.0183	HLA-A
apitolisib		chemical drug				0.0183	NDRG1
ECE1		peptidase				0.0183	EDN1
CARD8		other				0.0183	BIRC2
SLC8A1		transporter				0.0183	EDN1
IFI30		enzyme				0.0183	HLA-A
WWP1		enzyme				0.0183	KLF5
MKNK2		kinase				0.0183	ISG15
MLST8		other				0.0183	ISG15
IGF2BP3		translation regulator				0.0183	CD44
ATF7IP		transcription regulator				0.0183	JUND
INHBC		growth factor				0.0183	JUNB
ERC1		other				0.0183	NFKBIA
RACGAP1		transporter				0.0183	CD14
RHCE/RHD		transporter				0.0183	CD47
CDO1		enzyme				0.0183	IGF1
Lycium barbarum polysaccharides		chemical - endogenous non-mammalian				0.0183	IGF1
VEZF1		transcription regulator				0.0183	EDN1
Ewsr1		other				0.0183	LMNA
WASF1		other				0.0183	EZR
mir-297		microRNA				0.0183	JUNB
4-ethylsulfanylphenylmethylene hydantoin		chemical reagent				0.0183	CD44
4-hydroxyphenylmethylene hydantoin		chemical reagent				0.0183	CD44
iCRT14		chemical reagent				0.0183	CD47
polyhydroxyethyl methacrylate		chemical reagent				0.0183	EZR
dilazep		chemical drug				0.0183	F3
tarenflurbil		chemical drug				0.0183	JUNB
palmitoylcarnitine		chemical - endogenous mammalian				0.0183	CLDN4
salsalate		chemical drug				0.0183	NFKBIA
GKT137831		chemical drug				0.0183	CD44
potassium cyanide		chemical reagent				0.0183	TIMP2
nickel subsulfide		chemical toxicant				0.0183	NDRG1
phosphoramidon		chemical - endogenous non-mammalian				0.0183	EDN1
GNE-317		chemical - kinase inhibitor				0.0183	NDRG1
2',5'-dideoxyadenosine		chemical reagent				0.0183	IGF1
2-amino-3-phosphonopropionic acid		chemical - endogenous mammalian				0.0183	JUNB
ZBED6		transcription regulator				0.0184	CRIM1,PMEPA1
IFT88		other				0.0184	CEBPB,TIMP3
GHRH		other				0.0184	IGF1,NAD+
IGF2BP1		translation regulator				0.0184	BIRC2,CD44
FHIT		enzyme				0.0184	RHOC,TGFB3
LOC105372576		other				0.0184	EDN1,TIMP3
bryostatin 1		chemical drug				0.0184	BIRC3,CD44
alitretinoin		chemical drug		1	bias	0.0185	CD14,IFNGR1,ISG15,PGLYRP1
COL18A1		other				0.0185	EDN1,F3,JUNB
SAMSN1		other				0.0185	EDN1,ISG15,SLCO3A1
NLRP3		other				0.0185	NFKB2,RELB,TACC2
lovastatin		chemical drug				0.0188	IGF1,LMNA,RHOC,SDC4
SIRT6		enzyme				0.019	BIRC3,CSF1,IGF1
methotrexate		chemical drug				0.0191	ACTG1,BTG2,CSF1,TIMP3,ZFP36L1
actinomycin D		biologic drug		-1.069	bias	0.0194	BIRC2,BIRC3,EDN1,F3,IFNGR1
Rar		group				0.0194	BTG2,CRYAB
SETD2		enzyme				0.0194	IGF1,SEMA3C
AHCY		enzyme				0.0194	KLF5,KRT18
methylnitronitrosoguanidine		chemical toxicant				0.0194	BTG2,NAD+
methylnitrosourea		chemical toxicant				0.0194	TIMP2,TIMP3
bardoxolone		chemical drug				0.0194	CEBPB,NFKBIA
SN-38		chemical drug				0.0194	BIRC2,BIRC3
succinic acid		chemical - endogenous mammalian				0.0194	ANXA3,CD44
CCL2		cytokine				0.0196	CEBPB,F3,IGF1
FGF8		growth factor				0.0196	CRYAB,DDAH2,SPARC
phorbol esters		chemical - other				0.0196	B2M,CD44,JUNB
PRKAG3		other				0.0196	ANKRD1,BTG2,CTNNA1,JUNB
spironolactone		chemical drug				0.0201	EDN1,TIMP2,TIMP3
cholesterol		chemical - endogenous mammalian				0.0203	CD14,CSF1,F3,TIMP3,Tpm1
Ap2		group				0.0205	IFNGR1,TGFB3
Fgf		group				0.0205	IGF1,JUNB
CHRNA7		transmembrane receptor				0.0205	TIMP2,TIMP3
GTF2B		transcription regulator				0.0205	IGF1,NFKBIA
SELP		transmembrane receptor				0.0205	F3,IGF1
NPM1-ALK		fusion gene/product				0.0205	CEBPB,NAD+
fisetin		chemical toxicant				0.0205	BIRC2,BIRC3
MITF		transcription regulator		1.342	bias	0.0206	CD44,GPM6B,ITGA3,SEMA3C,VAT1
desmopressin		biologic drug				0.0207	AHNAK,LMNA,YWHAH
5-fluorouracil		chemical drug		1.961		0.0208	ANXA2,BIRC2,BTG2,FXYD3,SFN,ZFP36L1
tacrolimus		chemical drug				0.0209	EDN1,JUNB,NFKBIA,PDLIM4,WLS
NFE2L2		transcription regulator		1.89	bias	0.0211	ACTG1,DSTN,HSP90AA1,IFRD1,LMNA,LY6E,Tpm1
TNFRSF1A		transmembrane receptor		1.732		0.0212	BIRC3,CD44,CEBPB,IGF1
NPM1		transcription regulator				0.0216	CSF1,IL6ST
IKZF2		transcription regulator				0.0216	HLA-E,Ly6a (includes others)
CAMK4		kinase				0.0216	F3,JUNB
FGFR3		kinase				0.0216	LTB,SPARC
HSPG2	0.223	enzyme				0.0216	HSP90AA1,IGF1
FOSB		transcription regulator				0.0216	CEBPB,F3
titanium dioxide		chemical drug				0.0216	CRYAB,IGF1
CDK19		kinase				0.0218	BTG2,SFN,ZFP36L1
(+)-MK-801		chemical drug				0.0218	JUNB,JUND,NFKBIA
RARB		ligand-dependent nuclear receptor				0.0224	BIRC2,CRYAB,EZR,SFTPD
HDAC3		transcription regulator				0.0224	BIRC3,NFKBIA,RELB
STAT		group				0.0227	IL6ST,JUNB
CASZ1		enzyme				0.0227	EDN1,TGFB3
MEX3A		other				0.0227	CD44,DCLK1
NSD2		enzyme				0.0227	BTG2,IGF1
TWIST2		transcription regulator				0.0227	CD44,KLF6
APR-246		chemical drug				0.0227	GADD45B,IGFBP7
SPRY2		other				0.0227	CLDN7,ISG15
ARRB2		other				0.0227	F3,JUNB
IL27RA		transmembrane receptor				0.0227	CD44,LTB
PAK2		kinase				0.0227	IGF1,S100A6
TEAD4		transcription regulator				0.023	EDN1,JUNB,SH3D19
niacinamide		chemical - endogenous mammalian				0.023	CD14,JUNB,NAD+
imiquimod		chemical drug				0.023	ISG15,JUNB,RNF213
ascorbic acid		chemical - endogenous mammalian				0.023	IGF1,NDRG1,SPARC
TLR3		transmembrane receptor	Activated	2.205	bias	0.0235	EDN1,GADD45B,ISG15,JUNB,Oasl2
docosahexaenoic acid		chemical drug		-1.109	bias	0.0235	CD44,CEBPB,CSF1,TGFB3,TIMP2
CYLD		transcription regulator				0.0238	NFKB2,RELB
MEOX2		transcription regulator				0.0238	EDN1,F3
IL9		cytokine				0.0238	BCL3,JUNB
DRD2		G-protein coupled receptor				0.0238	CRYAB,IGF1
formaldehyde		chemical - endogenous mammalian				0.0238	JUNB,JUND
N-acetyl-L-cysteine		chemical drug	Inhibited	-2.183	bias	0.0242	BIRC2,BIRC3,CLDN7,EDN1,NFKBIA
isosorbide-5-mononitrate		chemical drug				0.0243	F3
Rsk		group				0.0243	CEBPB
tyrosine kinase		group				0.0243	CD44
CK1		group				0.0243	BIRC2
TR-RXR		complex				0.0243	BCL3
muraglitazar		chemical drug				0.0243	EDN1
ZXDC		transcription regulator				0.0243	CD14
Carlr		other				0.0243	NFKB2
AMOTL2		other				0.0243	ANKRD1
AGPAT1		enzyme				0.0243	IGF1
B3GNT2		enzyme				0.0243	CD14
ASCC1		transcription regulator				0.0243	BIRC2
proanthocyanidin derivative		chemical - other				0.0243	MFGE8
NXF1		other				0.0243	CD44
glucuronyl glucosamine glycan sulfate		chemical drug				0.0243	HSPG2
Nc2		complex				0.0243	HLA-A
ARTN		growth factor				0.0243	ALDH1A1
HABP2		peptidase				0.0243	F3
PKIA		other				0.0243	IGF1
UFD1		peptidase				0.0243	NFKB2
MADD		other				0.0243	MLPH
miR-328-3p (and other miRNAs w/seed UGGCCCU)		mature microRNA				0.0243	CD44
miR-330-5p (and other miRNAs w/seed CUCUGGG)		mature microRNA				0.0243	CD47
mir-32		microRNA				0.0243	BTG2
PBK		kinase				0.0243	BIRC3
SLC3A2		transporter				0.0243	ANKRD1
PTS		enzyme				0.0243	IGF1
NPLOC4		other				0.0243	NFKB2
FASTK		kinase				0.0243	BIRC2
RGD1560225		other				0.0243	EDN1
MBD5		other				0.0243	IGF1
WARS1		enzyme				0.0243	NFKBIA
FOXH1		transcription regulator				0.0243	ALDH1A1
LPAR3		G-protein coupled receptor				0.0243	KLF5
CFL1		other				0.0243	DSTN
CSTB		peptidase				0.0243	CEBPB
CRABP2		transporter				0.0243	BTG2
N-hydroxy-2,2-diphenylacetamide		chemical reagent				0.0243	EDN1
griseofulvin		chemical drug				0.0243	KRT18
NSC719239		chemical drug				0.0243	ITGA3
5-iodo-6-amino-1,2-benzopyrone		chemical reagent				0.0243	NAD+
pegintron		biologic drug				0.0243	ISG15
(-)-isoproterenol		chemical drug				0.0243	CD44
tolcapone		chemical drug				0.0243	COMT
taprostene		chemical reagent				0.0243	TSC22D3
protamine zinc insulin		biologic drug				0.0243	IGF1
E2F3		transcription regulator		1	bias	0.0245	EDN1,IGF1,TIMP3,WFDC2
LGALS3		other				0.0249	IGF1,KRT18,KRT19
SAA		group				0.025	CSF1,F3
xanthohumol		chemical drug				0.025	BIRC2,BIRC3
CTF1		cytokine				0.025	IL6ST,JUNB
CIITA		transcription regulator				0.025	B2M,HLA-A
Cdc42		enzyme				0.025	CSF1,MYH9
thalidomide		chemical drug				0.025	BIRC3,GADD45B
HNF4A		transcription regulator		-1.555		0.0251	ADSS2,AHNAK,ALDH1A1,CEBPB,CP,F11R,FAM107B,GADD45B,HLA-A,IFNGR1,IGF1,IL6ST,JUNB,KRT7,NDRG1,PLSCR1,PTGFR,SEMA3C,TIMP3,TMEM176B,TUFT1
Ifn gamma		complex				0.0255	CXCL16,EDN1,Ly6a (includes others)
flutamide		chemical drug				0.0255	IGF1,IL6ST,SLCO3A1
IGF2		growth factor				0.0259	IGF1,JUNB,NDRG1,NFKBIA
FOXP3		transcription regulator				0.0259	CSF1,HLA-A,PGLYRP1,SDC4
1,25-dihydroxyvitamin D		chemical drug				0.0261	CSF1,IGF1
NORAD		other				0.0261	GADD45B,JUNB
PGF		growth factor				0.0261	BIRC2,EDN1
HSPA9		other				0.0261	KRT18,TIMP2
TNIP1		other				0.0261	HLA-A,RELB
TLR7/8		group				0.0261	EDN1,NFKBIA
bafilomycin A1		chemical drug				0.0261	NFKBIA,TIMP2
tetraethylammonium		chemical drug				0.0261	EFHD2,HSPB1
LHX1		transcription regulator				0.0262	Ly6a (includes others),PAH,PDPN
HOXA10		transcription regulator		0	bias	0.0263	ALDH1A1,HSP90AA1,KRT18,PDPN
CSF1R		kinase				0.0273	CSF1,JUNB
NKX2-5		transcription regulator				0.0273	ADSS2,ANKRD1
HOXC6		transcription regulator				0.0273	NFKB2,SH3D19
EFNA4		kinase				0.0273	KRT18,KRT7
SAHM1		chemical reagent				0.0273	CD44,LY6E
pristane		chemical toxicant				0.0273	ISG15,Ly6a (includes others)
sphingosine-1-phosphate		chemical - endogenous mammalian				0.0281	ANXA2,CD44,KLF5
E. coli serotype 0127B8 lipopolysaccharide		chemical - endogenous non-mammalian		1.067	bias	0.0282	CD14,CXCL16,IGF1,NFKBIA
JAK		group				0.0286	IGF1,ISG15
IRAK1		kinase				0.0286	CXCL16,RELB
ABL1		kinase				0.0286	CSF1,TGFB3
NOX4		enzyme				0.0286	CD44,RHOC
EFNA3		kinase				0.0286	KRT18,KRT7
H-7		chemical - kinase inhibitor				0.0286	ISG15,JUNB
cyclopamine		chemical reagent				0.0286	CD14,SPARC
IL18		cytokine		1.926	bias	0.0292	CD44,CSF1,CXCL16,GADD45B
thyroid hormone		chemical - endogenous mammalian				0.0297	BTG2,COMT,IGF1,S100A10
PP1		chemical - kinase inhibitor				0.0298	CXCL16,SIRPA
ACKR2		G-protein coupled receptor				0.0298	ISG15,Oasl2
methyl methanesulfonate		chemical toxicant				0.0298	BTG2,GADD45B
LG100268		chemical reagent				0.0298	BIRC2,NDRG1
PPARGC1A		transcription regulator	Inhibited	-2.4		0.0302	CEBPB,EDN1,IGFBP7,SEMA3C,TIMP2,TIMP3
norethindrone acetate		chemical drug				0.0303	F3
Erm		group				0.0303	CD44
edratide		biologic drug				0.0303	CD44
EGOT		other				0.0303	ISG15
1,2,3,4,6,7,8-heptachlorodibenzofuran		chemical toxicant				0.0303	COMT
anthralin		chemical drug				0.0303	KRT18
MARCHF3		other				0.0303	NFKBIA
TRIM29		transcription regulator				0.0303	CD44
elocalcitol		chemical drug				0.0303	IFNGR1
BUD23		enzyme				0.0303	TSC22D3
ZMIZ2		transcription regulator				0.0303	CD44
Gata		group				0.0303	EDN1
betulin		chemical - endogenous non-mammalian				0.0303	TIMP2
Trk Receptor		group				0.0303	EDN1
2,3-bis(3'-hydroxybenzyl)butane-1,4-diol		chemical - endogenous mammalian				0.0303	SPARC
Vla-4		complex				0.0303	F3
SPR		enzyme				0.0303	IGF1
MAP4K1		kinase				0.0303	BIRC3
FZD7		G-protein coupled receptor				0.0303	CD44
NUP98		transporter				0.0303	YWHAH
RIMS2		other				0.0303	IGF1
miR-615-5p (and other miRNAs w/seed GGGGUCC)		mature microRNA				0.0303	KRT19
miR-873-5p (and other miRNAs w/seed CAGGAAC)		mature microRNA				0.0303	CD44
NACA		transcription regulator				0.0303	PDPN
TIMP4		other				0.0303	TIMP2
GCLC		enzyme				0.0303	JUNB
NUDT21		other				0.0303	SPARC
RPS3		enzyme				0.0303	NFKBIA
RAD51C		enzyme				0.0303	KRT18
HEPH		transporter				0.0303	CP
CITED1		transcription regulator				0.0303	IGF1
SENP6		peptidase				0.0303	BIRC2
EEF2K		kinase				0.0303	KLF5
SRSF6		other				0.0303	LMNA
NPHS2		other				0.0303	CD2AP
SPRY4		other				0.0303	ISG15
Cxcl3		cytokine				0.0303	CEBPB
RFXANK		transcription regulator				0.0303	HLA-A
Z-endoxifen		chemical - endogenous mammalian				0.0303	IGF1
tideglusib		chemical drug				0.0303	IGF1
OSU-CG12		chemical reagent				0.0303	KLF6
apicularen A		chemical reagent				0.0303	NFKBIA
milrinone		chemical drug				0.0303	F3
TAS-103		chemical drug				0.0303	NAD+
dicumarol		chemical drug				0.0303	NAD+
tranexamic acid		chemical drug				0.0303	F3
2,3,7,8-tetrachlorodibenzofuran		chemical toxicant				0.0303	COMT
3,7-dimethyl-1-propargylxanthine		chemical reagent				0.0303	F3
15-deoxy-delta-12,14 -PGJ 2		chemical - endogenous mammalian		0.315	bias	0.0306	BIRC2,BIRC3,HSPB1,NFKBIA
mir-8		microRNA		0	bias	0.0306	CD47,CLDN7,KRT19,TIMP2
fulvestrant		chemical drug		-0.243		0.0308	COMT,CSF1,Ifi27,IGF1,TSC22D3
SPARC	0.509	other				0.0309	CLDN4,NDRG1,SPARC
Laminin (complex)		complex				0.0311	BIRC3,SDC4
DLL4		other				0.0311	NFKB2,RELB
HDAC6		transcription regulator				0.0311	IGF1,JUNB
F7		peptidase				0.0311	F3,KLF5
ciprofloxacin		chemical drug				0.0316	CD47,HLA-A,MFGE8
YY1		transcription regulator				0.0316	ANKRD1,BTG2,CEBPB,CRYAB,Tpm1
KDM3A		transcription regulator				0.0324	EDN1,KLF5
ABCB4		transporter				0.0324	NFKB2,SPARC
EFNA5		kinase				0.0324	KRT18,KRT7
KLF1		transcription regulator				0.0324	BCAM,CD44
MEF2A		transcription regulator				0.0324	EDN1,TGFB3
IFNLR1		transmembrane receptor				0.0324	CSF1,ISG15
advanced glycation end-products		chemical - endogenous mammalian				0.0324	DDAH2,NAD+
memantine		chemical drug				0.0324	NFKBIA,SIRPA
STK40		kinase				0.0337	PDPN,SFTPD
GSK2816126		chemical drug				0.0337	KLF5,SPARC
N-[N-(3,5-difluorophenacetyl-L-Ala)]-S-phenylglycine t-butyl ester		chemical - protease inhibitor				0.0337	CSF1,RELB
ribavirin		chemical drug				0.0337	APOBEC3B,ISG15
acetaminophen		chemical drug		1	bias	0.0338	ACTG1,BTG2,IFRD1,IGF1
STAT5A		transcription regulator		1.067		0.0341	BIRC3,CEBPB,IGF1,IL6ST,LTB
NR1I3		ligand-dependent nuclear receptor				0.0346	ALDH1A1,FAM107B,GADD45B
TGFB3	0.152	growth factor				0.0346	JUND,TGFB3,TIMP3
lysophosphatidylinositol		chemical - endogenous mammalian				0.035	F3,LTB
LRP6		transmembrane receptor				0.035	ALDH1A1,KRT18
Hbb-b2		other				0.035	CD44,LTB
KDR		kinase				0.035	ANXA2,F3
PRKACA		kinase				0.035	CEBPB,IGF1
aldesleukin		biologic drug				0.035	B2M,TAPBP
RET		kinase				0.0353	CSF1,HSP90AA1,TIMP3
pyrrolidine dithiocarbamate		chemical reagent				0.0353	BIRC3,IGF1,NFKBIA
8-bromo-cAMP		chemical reagent		1.192	bias	0.0354	CEBPB,IGF1,PTGFR,TIMP2
NR5A2		ligand-dependent nuclear receptor				0.0361	CEBPB,CXCL16,JUNB
darusentan		chemical drug				0.0362	EDN1
globotriaosylceramide		chemical - endogenous mammalian				0.0362	CD44
ADRA1		group				0.0362	JUNB
Ho		group				0.0362	SPARC
N-hexanoylhomoserine lactone		chemical - endogenous non-mammalian				0.0362	CSF1
LRRC26		ion channel				0.0362	LTB
VIPAS39		other				0.0362	SPARC
HMG20A		transcription regulator				0.0362	KRT18
YOD1		enzyme				0.0362	ANKRD1
SLCO1C1		transporter				0.0362	ALDH1A1
PIWIL4		other				0.0362	TGFB3
BPIFB1		other				0.0362	NFKBIA
CLEC12A		other				0.0362	ISG15
lumefantrine		chemical drug				0.0362	HSPB1
PRKD2		kinase				0.0362	F3
CSRP3		other				0.0362	KRT18
Msx3		transcription regulator				0.0362	IGF1
ERAP1		peptidase				0.0362	HLA-A
TNFRSF10A		transmembrane receptor				0.0362	CD14
PPP4C		phosphatase				0.0362	ISG15
RAB27A		enzyme				0.0362	CD44
ANXA5		transporter				0.0362	F3
BCL2L12		other				0.0362	CRYAB
mir-506		microRNA				0.0362	RHOC
miR-320b (and other miRNAs w/seed AAAGCUG)		mature microRNA				0.0362	IGF1
EGFL7		other				0.0362	NFKBIA
SOX18		transcription regulator				0.0362	IL6ST
TAF10		transcription regulator				0.0362	IGF1
LIMS2		other				0.0362	CTNNA1
RNF111		enzyme				0.0362	PMEPA1
UTRN		transmembrane receptor				0.0362	ACTG1
EFEMP2		other				0.0362	EFEMP1
PSMD4		other				0.0362	CD14
YWHAB		other				0.0362	BCAM
EPHA4		kinase				0.0362	IGF1
ITGA11		other				0.0362	IGF1
ADAM9		peptidase				0.0362	ITGA3
SERPIND1		other				0.0362	KLF5
Ifna4		other				0.0362	ISG15
GCLM		enzyme				0.0362	JUNB
CXXC4		other				0.0362	SPARC
BCL2A1		other				0.0362	Ly6a (includes others)
ERCC3		enzyme				0.0362	IGF1
KPNA2		transporter				0.0362	ISG15
MIA-459		chemical reagent				0.0362	NFKB2
MIA-313		chemical reagent				0.0362	NFKB2
gelam honey		chemical reagent				0.0362	NFKBIA
atipamezole		chemical drug				0.0362	JUNB
lansoprazole		chemical drug				0.0362	CD14
atenolol		chemical drug				0.0362	B2M
diamide		chemical reagent				0.0362	SDC4
BAY 41-2272		chemical reagent				0.0362	ELF1
BB-Cl-amidine		chemical reagent				0.0362	IGF1
retinaldehyde		chemical - endogenous mammalian				0.0362	CD44
zofenopril		chemical drug				0.0362	CSF1
Co2+		chemical - endogenous mammalian				0.0362	NDRG1
E2F1		transcription regulator		0.114	bias	0.0362	CD2AP,CD44,CRYAB,DDAH2,IGF1,NFKBIA,TAPBP
CDKN2A		transcription regulator	Activated	2.2		0.0363	BTG2,CEBPB,NFKB2,PMEPA1,S100A6
herbimycin		chemical - kinase inhibitor				0.0363	JUNB,SIRPA
propranolol		chemical drug				0.0363	IGF1,NFKBIA
bicalutamide		chemical drug				0.0363	EZR,PMEPA1
VIP		other				0.0368	CEBPB,IGF1,NFKBIA
PRKAA2		kinase				0.0368	Ly6a (includes others),NFKBIA,ZFP36L1
PTP4A1	0.754	phosphatase				0.0368	IGFBP7,MYADM,SPARC
Hsp27		group				0.0377	CD14,CSF1
C/EBP		group				0.0377	IGF1,SFTPD
HOXA3		transcription regulator				0.0377	ANXA2,CEBPB
KAT2B		transcription regulator				0.0377	B2M,ISG15
fluvastatin		chemical drug				0.0377	DCLK1,EDN1
CD 437		chemical drug		-1.948	bias	0.0382	CEBPB,F3,HSP90AA1,NFKBIA
POU2F1		transcription regulator				0.0384	JUND,LY6E,TIMP3
BCL2		transporter				0.0384	NDRG1,NFKBIA,TIMP2
IFN type 1		group				0.0391	Bst2,ISG15
H2AB3 (includes others)		other				0.0391	DCLK1,PDZK1IP1
TEAD2		transcription regulator				0.0391	EDN1,SH3D19
quinolinic acid		chemical - endogenous mammalian				0.0391	JUNB,JUND
PKD1		ion channel		-1		0.0393	ALDH1A1,CXCL16,KRT18,PAH
KDM1A		enzyme		-0.577		0.0393	Bst2,CLDN7,CTNNA1,KRT18
PSMB11		peptidase				0.04	CLDN4,CLDN7,GADD45B
SQSTM1		transcription regulator				0.0405	EDN1,NFKBIA
PROC		peptidase				0.0405	BIRC2,NFKB2
TEAD3		transcription regulator				0.0405	EDN1,SH3D19
CDX1		transcription regulator				0.0405	FXYD3,Muc1
BRD2		kinase				0.0405	CD47,S100A6
acetovanillone		chemical drug				0.0405	EDN1,F3
bleomycin		chemical drug		1.969	bias	0.0405	IGF1,SDC4,TIMP2,TIMP3
nicotine		chemical drug				0.0411	CD44,EDN1,IGF1,JUNB
GH1		growth factor				0.0417	CEBPB,IGF1,JUNB
Hsp70		group				0.0419	CD14,NFKBIA
SPHK1		kinase				0.0419	BIRC2,BIRC3
IGFBP2		other				0.0419	EFEMP1,TGFB3
PTGS1		enzyme				0.0419	CEBPB,EDN1
IRF6		transcription regulator				0.0419	APOBEC3B,CD14
nicotinic acetylcholine receptor		complex				0.0421	JUNB
SERCA		group				0.0421	BTG2
etretinate		chemical drug				0.0421	KRT18
5R-hydroxytriptolide		chemical drug				0.0421	CD14
DGKE		kinase				0.0421	F3
RIOX1		enzyme				0.0421	IGF1
poly(dG-dC)		chemical reagent				0.0421	ISG15
ZNF100		transcription regulator				0.0421	TGFB3
ST6GALNAC1		enzyme				0.0421	B2M
ZNF85		transcription regulator				0.0421	TGFB3
ZNF254		transcription regulator				0.0421	TGFB3
RASSF8		other				0.0421	TGFB3
FIRRE		other				0.0421	CSF1
ZNF431		transcription regulator				0.0421	TGFB3
SNED1		other				0.0421	IGF1
KMT5B		enzyme				0.0421	TSC22D3
sotrastaurin		chemical drug				0.0421	NFKBIA
HNRNPR		other				0.0421	GPM6B
DUSP10		phosphatase				0.0421	KLF5
PTPRB		phosphatase				0.0421	EDN1
HAS1		enzyme				0.0421	CD44
miR-219a-5p (and other miRNAs w/seed GAUUGUC)		mature microRNA				0.0421	CD14
mir-320		microRNA				0.0421	IGF1
ZNF665		other				0.0421	TGFB3
DLC1		other				0.0421	S100A10
ZNF528		other				0.0421	TGFB3
ELMO1		other				0.0421	EDN1
PFN1		other				0.0421	ANXA2
DAB1		other				0.0421	ITGA3
KHDRBS1		transcription regulator				0.0421	CD44
TMPO		other				0.0421	TIMP2
ZNF43		transcription regulator				0.0421	TGFB3
ZNF429		transcription regulator				0.0421	TGFB3
FZD5		G-protein coupled receptor				0.0421	CD14
MLLT3		transcription regulator				0.0421	EDN1
MED13L		other				0.0421	ANKRD1
VCAM1		transmembrane receptor				0.0421	CD44
MS4A1		other				0.0421	ZFP36L1
AQP5		transporter				0.0421	CLDN7
USP21		peptidase				0.0421	ISG15
SFTPC		other				0.0421	SFTPD
HLA-B		transmembrane receptor				0.0421	EDN1
Foxp2		transcription regulator				0.0421	PDPN
Npy4r		G-protein coupled receptor				0.0421	IGF1
ZNF708		other				0.0421	TGFB3
SLC19A1		transporter				0.0421	Ly6a (includes others)
Gm26313		other				0.0421	GPM6B
AP20187		chemical reagent				0.0421	CEBPB
AR-A014418		chemical reagent				0.0421	CD44
6,7-dinitroquinoxaline-2,3-dione		chemical reagent				0.0421	JUNB
beta-lapachone		chemical drug				0.0421	NAD+
gliotoxin		chemical toxicant				0.0421	BIRC3
saquinavir		chemical drug				0.0421	NFKBIA
1,1-diethyl-2-hydroxy-2-nitrosohydrazine		chemical toxicant				0.0421	NFKBIA
retroinverso ERG inhibitory peptide 2		chemical reagent				0.0421	NDRG1
retroinverso ERG inhibitory peptide 1		chemical reagent				0.0421	NDRG1
murabutide		chemical reagent				0.0421	CEBPB
sanguinarine		chemical - endogenous non-mammalian				0.0421	TIMP2
quisqualic acid		chemical - endogenous non-mammalian				0.0421	JUNB
SRC		kinase				0.0425	F3,KRT18,SIRPA
RUNX2		transcription regulator				0.0433	EDN1,FLRT2,GADD45B
paraquat		chemical toxicant				0.0433	EDN1,KLF6,SFTPD
inosine		chemical - endogenous mammalian				0.0433	ANXA2,RHOC
RTN4		other				0.0433	JUND,Tpm1
IL4R		transmembrane receptor				0.0433	CD14,FXYD3
MMP1		peptidase				0.0433	IGF1,NFKBIA
JAG1		growth factor				0.0433	TGFB3,TIMP3
PARP1		enzyme				0.0442	IGF1,NAD+,TIMP2
GRB2		other				0.0448	KRT7,LTB
CEBPE		transcription regulator				0.0448	CD14,CEBPB
EIF2S1		translation regulator				0.0448	CEBPB,IFRD1
PLAG1		transcription regulator				0.0448	KRT19,PLEC
IL2RG		transmembrane receptor				0.0448	HLA-A,LTB
NKX3-1		transcription regulator				0.0448	BTG2,SDC4
HSPA5		enzyme				0.0448	CD47,ISG15
TMPRSS2-ERG		fusion gene/product				0.045	CEBPB,LTB,SAMD9L
losartan potassium		chemical drug				0.0459	EDN1,F3,TGFB3
leukotriene D4		chemical - endogenous mammalian				0.0463	F3,NDRG1
EBI3		cytokine				0.0463	B2M,HLA-A
Am 580		chemical toxicant				0.0463	F3,IFNGR1
N-formyl-Met-Leu-Phe		chemical reagent				0.0463	NFKBIA,SIRPA
N-acetylsphingosine		chemical reagent				0.0463	CEBPB,CRYAB
propylthiouracil		chemical drug				0.0476	BTG2,IGF1,Ly6a (includes others)
CLUH		translation regulator				0.0478	HLA-A,ISG15
MOG		other				0.0478	CD44,IGF1
BAX		transporter				0.0478	BIRC2,HLA-A
MAP2K7		kinase				0.0478	BIRC3,JUNB
valsartan		chemical drug				0.0478	EDN1,F3
BMP4		growth factor	Activated	2	bias	0.0479	CEBPB,JUNB,KRT7,SPARC
saikosaponin A		chemical reagent				0.048	JUNB
pervanadate		chemical reagent				0.048	NFKBIA
GPIIB-IIIA		complex				0.048	BCL3
LGALS12		other				0.048	CEBPB
SENP7		peptidase				0.048	BIRC2
ITPRID2		other				0.048	IGF1
HDAC11		transcription regulator				0.048	ISG15
NELFCD		other				0.048	JUNB
LTBP4	0.056	growth factor				0.048	TGFB3
tofacitinib		chemical drug				0.048	ISG15
TFPI		other				0.048	F3
MIA		other				0.048	SPARC
SLC25A4		transporter				0.048	BIRC3
SNTA1		other				0.048	IGF1
TTN		kinase				0.048	CRYAB
ERCC4		enzyme				0.048	IGF1
miR-192-5p (and other miRNAs w/seed UGACCUA)		mature microRNA				0.048	IGF1
mir-326		microRNA				0.048	CD47
SMARCA1		transcription regulator				0.048	SFN
FALEC		other				0.048	BTG2
GRIP1		transcription regulator				0.048	IGF1
ERCC1		enzyme				0.048	IGF1
MYH10		enzyme				0.048	MYH9
KSR1		kinase				0.048	Tpm1
APCS		other				0.048	SIRPA
TP53INP1		other				0.048	SPARC
CLTC		other				0.048	HLA-A
GRB10		other				0.048	IGF1
LY86		other				0.048	CD14
CCX771		chemical reagent				0.048	CD44
KLKB1		peptidase				0.048	F3
teasaponin		chemical - endogenous non-mammalian				0.048	NFKBIA
Duxbl1 (includes others)		other				0.048	Oasl2
ZNF91		transcription regulator				0.048	TGFB3
Rfx5		other				0.048	HLA-A
PCBP1		translation regulator				0.048	CD44
ULBP1		transmembrane receptor				0.048	HLA-A
MIA-602		chemical reagent				0.048	IGF1
MM-401		chemical reagent				0.048	KLF6
10-hydroxy-cis-12-octadecenoic acid		chemical reagent				0.048	CLDN7
delta-aminolevulinic acid		chemical - endogenous mammalian				0.048	F3
AGI-1067		chemical drug				0.048	F3
magnesium sulfate		chemical drug				0.048	NFKBIA
ETV6-NTRK3		fusion gene/product				0.048	Oasl2
tosyllysine chloromethyl ketone		chemical - protease inhibitor				0.048	NFKBIA
EDN1	0.163	cytokine		1.993	bias	0.0486	EDN1,EZR,JUNB,TIMP3
ZEB2		transcription regulator				0.0493	KRT18,KRT19
SERPINF1		other				0.0493	CRYAB,NFKBIA
EFNA2		kinase				0.0493	KRT18,KRT7
Pln		other				0.0493	ANXA2,EZR
iron		chemical - endogenous mammalian				0.0493	GADD45B,NDRG1
CTCF		transcription regulator				0.0494	CD14,NFKB2,TGFB3
ETS1		transcription regulator				0.0499	CD14,CD44,JUNB,LTB
STK11		kinase	Activated	2		0.114	GADD45B,JUNB,LTB,NFKB2

## Sheet: DBA+ duct cluster 5 vs all
© 2000-2020 QIAGEN. All rights reserved.
Upstream Regulator	Expr Log Ratio	Molecule Type	Predicted Activation State	Activation z-score	Flags	p-value of overlap	Target Molecules in Dataset	Mechanistic Network
ST1926		chemical drug	Inhibited	-3.051	bias	1.79e-10	CDK4,CDKN1A,CLIC1,DYNLL1,EIF3D,H2AZ1,KIF3A,LGALS1,ODC1,PABPC1,PFN1,RPL41,TXN
MYC		transcription regulator	Activated	2.912	bias	3.04e-09	ABCE1,BAX,CANX,CCNB2,CDK4,CDKN1A,CKS2,CRIP1,Crip2,EIF2S1,EIF3D,ELAVL1,EPCAM,H2AZ1,HLA-A,Hmgn2 (includes others),LGALS1,MKI67,NUCB1,NUDC,ODC1,PPIA,RPL41,RPS19,RPS27L,SERPINH1,STMN1,TXN,TXNRD1,YRDC	62 (9)
TP53		transcription regulator		1.531		9.49e-08	ARHGEF2,BAX,CALU,CCNB2,CCNG1,CDK4,CDKN1A,CENPE,CENPF,CKS2,CREB3,Crip2,EPHX1,GNA13,H2AZ1,HMGB2,Hmgn2 (includes others),HSPG2,MCAM,MGMT,MKI67,NUPR1,PDS5A,PFN1,PHGDH,PPP1CA,PSMB9,RBM3,RPE,RPS19,RPS27L,SERPINH1,STMN1,Tmsb4x (includes others),TP53INP1,YWHAH	66 (13)
doxifluridine		chemical drug	Activated	2.176	bias	1.06e-07	BAX,CCNG1,CDKN1A,RPS27L,TP53INP1
SLC29A1		transporter	Activated	2.219	bias	1.96e-07	BAX,CCNG1,CDKN1A,RPS27L,TP53INP1	20 (3)
CD 437		chemical drug		-1.156	bias	2.99e-07	BAX,CDK4,CDKN1A,CLIC1,EIF3D,KIF3A,LGALS1,ODC1,PABPC1,PFN1,TXN	17 (4)
paclitaxel		chemical drug		0.13	bias	3.76e-07	ARHGEF2,BAX,CCNG1,CDKN1A,HLA-A,MKI67,PHGDH,RBM3,STMN1,TOP3B,TP53INP1,TSC22D1,WNT4	69 (14)
O6-benzylguanine		chemical drug		-0.913		5.29e-07	CCNB2,CDKN1A,MGMT,MKI67	47 (7)
CDKN1A	0.139	kinase		-0.108	bias	6.2e-07	BAX,CDK4,CDKN1A,CELA2A,CENPF,EIF2S1,H2AZ1,HMGB2,MKI67,PHGDH,STMN1,WNT4	64 (12)
TGFB1		growth factor		1.744	bias	9.71e-07	ABCE1,ARHGEF2,BAX,CCNB2,CDK4,CDKN1A,CENPE,CENPF,CKS2,CNIH1,CREB3,DYNLL1,ELAVL1,EPCAM,GNA13,HEXB,HSPG2,KRT19,LSM6,MGMT,MKI67,NPTXR,NUPR1,PHGDH,PRSS3,RBM3,SERP1,SERPINH1,SNRNP70,TSC22D1,TXNRD1,VAPB,WNT4	70 (10)
RRM2B		enzyme				1.46e-06	BAX,CDKN1A,TP53INP1
JAK2	0.11	kinase	Activated	2.156	bias	1.73e-06	BAX,CDKN1A,JAK2,ODC1,PFN1,PSMB9,SERPINH1,TP53INP1,TSC22D1	66 (11)
lactacystin		chemical - protease inhibitor		1.606	bias	1.9e-06	CDKN1A,CLIC1,HLA-A,HMGB2,HSP90B1,PFN1,PPIA,STMN1,TXN,TXNRD1	27 (4)
NRAS		enzyme		-1.746	bias	1.99e-06	BAX,CCNB2,CCNG1,CDKN1A,Crip2,EPHX1,HLA-A,LGALS1,MKI67,P3H4
1,2-dithiol-3-thione		chemical reagent	Activated	2.521	bias	2.83e-06	ACSL5,AGPAT3,DYNLL1,EIF2S1,EIF3D,EPHX1,HSP90B1,HTATIP2,TXN,TXNRD1	13 (2)
ERBB2		kinase	Activated	2.158	bias	4.05e-06	CCNB2,CDCA3,CDKN1A,CENPE,CENPF,CKS2,CRIP1,DUSP18,EBP,HMGB2,LGALS1,Marcks,MKI67,PRSS3,PSMB9,SERP1,SRP19,STRBP,Tmsb4x (includes others),TSC22D1
E2F4		transcription regulator				6.16e-06	CCNB2,CDCA3,CDKN1A,CENPE,CKS2,H2AZ1,HSP90B1,MKI67,STMN1,TP53INP1
Z-LLL-CHO		chemical - protease inhibitor	Activated	2.88	bias	6.8e-06	BAX,CCNG1,CDK4,CDKN1A,CLIC1,ELAVL1,HMGB2,HSP90B1,PFN1,PPIA,STMN1,TXN	47 (12)
CASR		G-protein coupled receptor		1.414	bias	6.98e-06	BAX,H2AZ1,Hmgn2 (includes others),LGALS1,NUPR1,ODC1,PPP1CA,TXN
KLK4		peptidase				7.37e-06	CCNB2,CCNG1,CDKN1A,MKI67
FOXM1		transcription regulator	Activated	2.152	bias	7.77e-06	CCNB2,CDKN1A,CENPB,CENPE,CENPF,CKS2,MKI67,STMN1	63 (10)
MYCN		transcription regulator		1.234		7.91e-06	ABCE1,BAX,CCNT1,CDKN1A,HLA-A,LGALS1,NUCB1,ODC1,PHGDH,RPL41,RPS19
XBP1		transcription regulator	Activated	2.95	bias	8.34e-06	COPG1,CREB3,DDOST,HSP90B1,SEC16A,SEC61G,SERP1,SRP19,SURF4,TXN
WT1		transcription regulator		0.033		8.34e-06	CDKN1A,CLIC1,HSP90B1,HSPG2,NUCB1,ODC1,Ptma (includes others),SEC13,TSC22D1,WNT4
mibolerone		chemical drug	Activated	2.121	bias	8.63e-06	CALU,EIF2S1,HEXB,HSP90B1,PPIA,SERP1,STMN1,UFM1
CDKN2A		transcription regulator		-0.03		1.13e-05	BAX,CCNG1,CDKN1A,GNA13,HMGB2,JAK2,KCNK1,MKI67,ODC1,PSMB9,TP53INP1	58 (14)
gentamicin		chemical drug	Activated	2.534		1.2e-05	BAX,CCNG1,EIF3D,HSP90B1,MGMT,NUDC,PHGDH,RPS27L,TSC22D1,YWHAH
TP53INP1	0.281	other				1.26e-05	BAX,CDKN1A,TP53INP1
methylselenic acid		chemical reagent				1.53e-05	ATF5,CCNB2,CDK4,CDKN1A,CENPF,DYNLL1,EPHX1,H1-0,HSP90B1,MKI67	50 (5)
diethylstilbestrol		chemical drug	Activated	2.197	bias	1.67e-05	ADCY6,CCNB2,CDKN1A,CENPE,CENPF,HLA-A,HSP90B1,JAK2,LGALS1,MKI67,WNT4	27 (2)
E2F1		transcription regulator		1.03	bias	1.74e-05	ACSL5,BAX,CCNB2,CDK4,CDKN1A,CLIC1,HMGB2,Hmgn2 (includes others),HSP90B1,NUDC,PSMB9,STMN1,TP53INP1,TXNRD1	70 (17)
TCF3		transcription regulator		0.62		1.77e-05	CCNB2,CDCA3,CDKN1A,CKS2,EPCAM,H1-0,HMGB2,Hmgn2 (includes others),HSP90B1,MKI67,PPIA,PRSS3	15 (2)
cisplatin		chemical drug	Activated	3.112	bias	1.85e-05	BAX,CCNG1,CDKN1A,GPX2,KRT19,MCAM,MGMT,ODC1,PHGDH,PPIA,RBM3,RPS27L,SLC25A36,STMN1,Tmsb4x (includes others),TP53INP1,TSC22D1,WNT4	61 (15)
dihydrotestosterone		chemical - endogenous mammalian		0.399	bias	2.69e-05	BAX,CANX,CDKN1A,DYNLL1,ELAVL1,HLA-A,KRT19,LGALS1,MCAM,NUCB1,ODC1,PFN1,PHGDH,Tmsb4x (includes others),WNT4	54 (7)
MED15		transcription regulator				2.99e-05	BAX,CDKN1A,KCNK1
HRAS		enzyme		-0.015	bias	3.57e-05	BAX,CALU,CCNG1,CDK4,CDKN1A,CREB3,Crip2,EPHX1,GNA13,KRT19,MCAM,PFN1,PSMB9,SERP1,Tmsb4x (includes others),TSC22D1	70 (16)
MAGEA2/MAGEA2B		other				5.17e-05	BAX,CDKN1A
SALL2		transcription regulator				5.17e-05	BAX,CDKN1A
PTEN		phosphatase		-1.227		5.3e-05	BAX,CCNB2,CDK4,CDKN1A,CKS2,EBP,HEXB,KIF3A,KRT19,MCAM,MKI67,PHGDH,PTP4A2,SURF4,Tmsb4x (includes others),WNT4	77 (14)
ACTL6A		other		0		5.37e-05	CCNB2,CCNG1,CDKN1A,TP53INP1
sirolimus		chemical drug	Inhibited	-3.065	bias	5.5e-05	BAX,CCNB2,CDK4,CDKN1A,CLIC1,EIF2S1,HSP90B1,MKI67,ODC1,PPIA,RPL41,RPS19,STMN1,TP53INP1	60 (10)
PBRM1		other				5.82e-05	CDKN1A,CENPE,CENPF
VDR		transcription regulator		1.414	bias	5.98e-05	BAX,CDKN1A,H2AZ1,Hmgn2 (includes others),LGALS1,NUPR1,ODC1,PPP1CA,TXN
beta-estradiol		chemical - endogenous mammalian	Activated	3.454	bias	7.12e-05	ALDH7A1,ARHGEF2,ATF5,BAX,C9orf24,CCNB2,CCNG1,CDKN1A,CENPF,CKS2,DDOST,DYNLL1,EIF2S1,EIF3D,HLA-A,HMGB2,HSP90B1,JAK2,KRT19,MCAM,MKI67,NUPR1,ODC1,PDAP1,PTP4A2,TOP3B,TP53INP1,TSC22D1,TXN,TXNRD1,WNT4,YWHAH	70 (10)
HGF		growth factor	Activated	2.528	bias	7.16e-05	CCNG1,CDK4,CDKN1A,CENPF,DYNLL1,EBP,EPCAM,GNA13,KRT19,LSM1,MKI67,SNRNP70,YWHAH
ESR1		ligand-dependent nuclear receptor		1.187		7.22e-05	ARHGEF2,ATF5,BAX,CCNG1,CDK4,CDKN1A,CENPE,CENPF,COPG1,CYFIP1,EPCAM,GNA13,HSP90B1,JAK2,KRT19,LGALS1,MIB2,MKI67,NUCB1,PTP4A2,RPL41,SLC25A36,Tmsb4x (includes others),WNT4	71 (10)
CDK19		kinase	Inhibited	-2.433	bias	7.36e-05	BAX,CCNG1,CDKN1A,EPHX1,RPS27L,TSC22D1
LGALS3		other				7.8e-05	BAX,CCNB2,CDKN1A,DDOST,KRT19,PRSS3	12 (4)
mitomycin C		chemical drug	Activated	2.161	bias	7.87e-05	BAX,CCNB2,CDKN1A,MCAM,TP53INP1	48 (10)
NFE2L2		transcription regulator	Activated	2.759	bias	8.18e-05	ACSL5,AGPAT3,CDKN1A,DYNLL1,EIF2S1,EPHX1,GPX2,HSP90B1,HTATIP2,PHGDH,TXN,TXNRD1
imipramine blue		chemical drug		-1.982	bias	9.05e-05	CDK4,CENPE,CENPF,STMN1
hydrogen peroxide		chemical - endogenous mammalian	Activated	3.089	bias	9.26e-05	BAX,CDKN1A,DUSP16,MAPKAP1,MCAM,ODC1,PPP1CA,PTP4A2,SERPINH1,STMN1,TP53INP1,TXN,WNT4	71 (14)
tamoxifen		chemical drug		1.339		0.000117	ABCE1,BAX,CDKN1A,EPHX1,HSP90B1,MKI67,PFN1,PHGDH,SNRNP70,TXN	58 (6)
cytarabine		chemical drug	Activated	2.19	bias	0.000123	BAX,CDKN1A,HLA-A,PPP1CA,TP53INP1	38 (6)
3,3'-diindolylmethane		chemical drug		1.009		0.000132	BAX,CDK4,CDKN1A,HLA-A,KRT19	60 (8)
PPARA		ligand-dependent nuclear receptor		1.59	bias	0.000138	ACSL5,BAX,CCNT1,CDK4,CDKN1A,COX6B2,DYNLL1,H2AZ1,Hmgn2 (includes others),MGMT,MKI67,TXN	48 (4)
ZNF346		other				0.000154	BAX,CDKN1A
TTC5		other				0.000154	BAX,CDKN1A
RNF144B		enzyme				0.000154	BAX,CDKN1A	66 (10)
SEC23B		transporter				0.000154	BAX,HSP90B1
AP2A2		transporter				0.000154	BAX,CDKN1A
UIMC1		other				0.000154	BAX,CDKN1A	5 (2)
ofloxacin		chemical drug				0.000154	BAX,CDKN1A	33 (3)
spermidine		chemical - endogenous mammalian				0.000157	CDKN1A,KRT19,ODC1	40 (5)
nitric oxide		chemical - endogenous mammalian		1.577	bias	0.000165	BAX,CCNG1,CDKN1A,HSPG2,MKI67,ODC1,TXNRD1	65 (11)
TCF4		transcription regulator		0.447	bias	0.000168	CCNB2,CDCA3,CDKN1A,CKS2,EPCAM,H1-0,HMGB2,Hmgn2 (includes others),HSP90B1,JAK2,MKI67
EIF4E		translation regulator	Activated	2.577	bias	0.000192	CDK4,CDKN1A,CKS2,GPX2,LSM1,LSM6,ODC1
prostaglandin A2		chemical - endogenous non-mammalian				0.000192	CDK4,CDKN1A,ELAVL1	39 (5)
GAS2L3		other				0.000192	CCNG1,CDKN1A,EPHX1
CHEK2		kinase				0.000192	BAX,CCNG1,CDKN1A	47 (7)
IL3		cytokine		1.945	bias	0.000196	ATF5,CCNG1,CDKN1A,GNA13,HLA-A,HSP90B1,ODC1,PHGDH,RBM3,RPS19
l-asparaginase		biologic drug		0.243	bias	0.000198	ATF5,CCNB2,CDKN1A,CENPF,NUPR1,PHGDH
nitrofurantoin		chemical drug	Activated	2.621		0.000207	BAX,CCNG1,GPX2,KRT19,ODC1,STMN1,TXN
mir-7		microRNA				0.000232	BAX,CDKN1A,MAPKAP1
decursin		chemical - endogenous non-mammalian				0.000232	BAX,CDK4,CDKN1A	62 (11)
EP400		other		0.689	bias	0.000235	CDCA3,CDKN1A,CENPF,H2AZ1
IL10		cytokine		1.384		0.00024	BAX,CDKN1A,CENPF,ELAVL1,HEXB,HMGB2,HTATIP2,LGALS1,MKI67,PHGDH,PSMB9
geldanamycin		chemical - endogenous non-mammalian		1.066	bias	0.000246	BAX,CCNT1,CDK4,EIF2S1,HEXB,HSP90B1,LSM1,NUDC,PFN1	37 (3)
NME1		kinase				0.000282	BAX,CDK4,CDKN1A,PABPC1
advanced glycation end-products		chemical - endogenous mammalian				0.000282	BAX,CDKN1A,MKI67,PFN1	8 (3)
SNHG1		other				0.000307	BAX,CDKN1A
tozasertib		chemical drug				0.000307	BAX,CDKN1A
GNL3L		other				0.000307	BAX,CDKN1A
TOPORS		enzyme				0.000307	BAX,CDKN1A	57 (6)
LETMD1		other				0.000307	BAX,CDKN1A
NOC2L		transcription regulator				0.000307	BAX,CDKN1A
ZBTB17		transcription regulator				0.00032	CCNB2,CDKN1A,CENPF,MKI67,ODC1	57 (6)
idarubicin		chemical drug				0.000328	BAX,CDKN1A,TP53INP1	29 (7)
Irgm1		other	Inhibited	-2	bias	0.000336	CCNB2,CDCA3,MKI67,NUPR1
MELK		kinase				0.000509	BAX,CDKN1A
LUCAT1		other				0.000509	BAX,CDKN1A	57 (6)
NUP98		transporter				0.000509	CDKN1A,YWHAH
PPP1R13B		phosphatase				0.000509	BAX,CDKN1A
BRCA2		transcription regulator				0.000509	BAX,CDKN1A
FT671		chemical - protease inhibitor				0.000509	CDKN1A,RPS27L
DOT1L		phosphatase				0.000512	PABPC1,PPIA,RPL41
methapyrilene		chemical drug				0.000522	CCNG1,EIF2S1,ODC1,SERP1,STMN1,TXNRD1
TERT		enzyme				0.000563	BAX,CALU,CDKN1A,GNA13,KRT19,SERP1	16 (5)
mir-122		microRNA	Inhibited	-2.229	bias	0.000571	CCNG1,H1-0,NUDC,RBM3,RCC2
FAM3B		cytokine				0.000586	CDKN1A,KRT19,LGALS1
BRD7		transcription regulator				0.000586	BAX,CCNG1,CDKN1A	5 (2)
pifithrin alpha		chemical reagent				0.000586	BAX,CCNG1,CDKN1A
epicatechin gallate		chemical drug				0.000586	CCNG1,CDKN1A,MGMT
SNCA		enzyme	Activated	2		0.000619	BAX,CHMP4B,CTXN1,FAM81A,HSP90B1,KIF3A,NPTXR,PSMB9,YWHAH
ethanol		chemical - endogenous mammalian		1.812	bias	0.000646	ADCY6,BAX,CDKN1A,EPHX1,HLA-A,HSP90B1,HTATIP2,JAK2,LGALS1,TP53INP1	18 (2)
UBE3A		enzyme				0.000666	CDKN1A,TP53INP1,WNT4
NTRK1		kinase				0.000666	CDKN1A,LGALS1,TSC22D1
TP63		transcription regulator		0.846	bias	0.000722	BAX,CCNG1,CCNT1,CDKN1A,CKS2,CTXN1,GPX2,KCNK1,MKI67,STMN1,WNT4	49 (5)
RASSF3		other				0.000761	BAX,CDKN1A
AMER1		other				0.000761	BAX,CDKN1A
nomilin		chemical - endogenous non-mammalian				0.000761	BAX,CDKN1A
PLSCR1		enzyme				0.000761	CDK4,CDKN1A
BCL2L12		other				0.000761	CCNG1,CDKN1A
EIF5A		translation regulator				0.000761	BAX,CDKN1A
USP11		peptidase				0.000761	BAX,CDKN1A	64 (12)
SMARCD1		transcription regulator				0.000761	BAX,CDKN1A
KLF4		transcription regulator		0.934	bias	0.000769	BAX,CDKN1A,CENPE,EPCAM,KRT19,ODC1,SERPINH1,TXNRD1
TP73		transcription regulator		0.42	bias	0.000811	BAX,CCNG1,CDKN1A,CKS2,HTATIP2,KCNK1,MGMT,NUPR1,STMN1,WNT4	70 (13)
benzene		chemical toxicant		1.103		0.000816	ATF5,CCNG1,CDKN1A,Ptms
PHF1		transcription regulator				0.000847	BAX,CCNG1,CDKN1A
PSMD10		transcription regulator				0.000847	BAX,CDK4,CDKN1A	44 (4)
FOXO3		transcription regulator		-0.38		0.000852	BAX,CCNB2,CDK4,CDKN1A,HTATIP2,MCAM,MKI67,NUPR1,TP53INP1	65 (11)
PTGER2		G-protein coupled receptor	Activated	2.236	bias	0.000869	CCNB2,CENPE,CENPF,CKS2,MKI67
fulvestrant		chemical drug		0.06		0.000907	ASCC3,BAX,CCDC34,CDKN1A,CENPF,DYNLL1,STMN1,WNT4	60 (6)
HSPB1		other				0.000948	CCNB2,CDCA3,CDKN1A
LATS1		kinase				0.000948	BAX,EPCAM,KRT19	24 (2)
CGA		other		-1.342		0.000949	BAX,BEX4,HSP90B1,NUPR1,TP53INP1
INHA		growth factor		1.109		0.00099	BAX,CDK4,EPHX1,KRT19,TP53INP1
LDLR		transporter				0.000998	CCNB2,CDCA3,CDKN1A,CENPF,HSPG2,MKI67,PSMB9
tunicamycin		chemical - endogenous non-mammalian	Activated	2.154	bias	0.000998	CANX,CDKN1A,EIF2S1,HSP90B1,SEC61G,SRP19,SURF4	13 (2)
medroxyprogesterone acetate		chemical drug		0		0.00102	BAX,C9orf24,CCNB2,CENPF,CKS2,WNT4	48 (5)
FGF2		growth factor		1.616	bias	0.00103	BAX,CDKN1A,EPCAM,MCAM,MGMT,MKI67,ODC1,Ptma (includes others),Tmsb4x (includes others),WNT4	72 (13)
(6)-gingerol		chemical - endogenous non-mammalian				0.00106	CDK4,CDKN1A
PCM1		other				0.00106	CDKN1A,MKI67
MYCBP		transcription regulator				0.00106	CDK4,ODC1
4-coumaric acid		chemical - endogenous mammalian				0.00106	CDKN1A,ODC1
N-Ac-leucyl-leucyl-methioninal		chemical - protease inhibitor				0.00106	BAX,HSP90B1
PRL		cytokine		1.071	bias	0.00107	CDK4,CDKN1A,JAK2,KRT19,Marcks,NUPR1,ODC1,Tmsb4x (includes others)	71 (11)
chrysotile asbestos		chemical toxicant				0.00117	CCNB2,CKS2,HSP90B1
letrozole		chemical drug				0.00117	BAX,CDKN1A,MKI67	36 (3)
UCP1		transporter		1.664		0.00124	ARHGEF2,ATF5,Hmgn2 (includes others),NUPR1,ODC1,PHGDH
PML		transcription regulator		-0.047		0.00132	BAX,CDKN1A,PSMB9,STMN1,TXN,TXNRD1	64 (12)
MBD2		transcription regulator				0.00133	CDKN1A,CKS2,MGMT,NUPR1
methylmercury		chemical toxicant		1		0.00133	ATF5,BAX,CCNG1,Ptms
testosterone		chemical - endogenous mammalian	Activated	2.066	bias	0.00137	BAX,CDK4,CDKN1A,EIF2S1,LGALS1,LZTFL1,ODC1,PDAP1,TXNRD1	80 (15)
doxorubicin		chemical drug		1.346	bias	0.00138	BAX,CCNB2,CDKN1A,GPX2,JAK2,RBM3,STMN1,TP53INP1,TXN,WNT4	54 (9)
SHC1		other		1.236		0.0014	BAX,CDKN1A,HMGB2,TXN
evofosfamide		chemical drug				0.00141	CDK4,CDKN1A
CXCR1		G-protein coupled receptor				0.00141	BAX,CDK4	39 (5)
MTBP		other				0.00141	CDKN1A,ODC1
CLTC		other				0.00141	CDKN1A,HLA-A
DIABLO		other				0.00141	CDKN1A,MKI67
ethyl 2-{[(6,7-dimethyl-3-oxo-1,2,3,4-tetrahydro-2-quinoxalinyl)acetyl]amino}-4,5-dimethyl-3-thiophenecarboxylate		chemical reagent				0.00141	BAX,CDKN1A
methoxychlor		chemical toxicant				0.00141	BAX,HSP90B1
ciclopirox olamine		chemical drug				0.00141	CDK4,CDKN1A
dihematoporphyrin ether		chemical drug				0.00141	CDKN1A,HSP90B1
artemisinin		chemical drug				0.00141	CDK4,CDKN1A
caspase		group				0.00143	BAX,CDK4,CDKN1A	69 (13)
ACKR3		G-protein coupled receptor				0.00143	CDK4,CDKN1A,STMN1	39 (5)
ARID1A		transcription regulator				0.00143	CCNB2,CDKN1A,WNT4
vinblastine		chemical drug				0.00143	CCNG1,CDKN1A,HLA-A	37 (3)
IL15		cytokine		-0.555	bias	0.00145	CDK4,CDKN1A,CKS2,EBP,MKI67,PFN1,PSMB9,PTP4A2,RPE,TXNRD1
ERBB3		kinase		0.447		0.00149	BAX,CDKN1A,HEXB,PHGDH,STMN1
butyric acid		chemical - endogenous mammalian		-0.275		0.0015	BAX,CCNB2,CCNG1,CDK4,CDKN1A,H2AZ1,HMGB2,HSPG2,MKI67,NUCB1	70 (18)
ROR1		kinase				0.00157	HEXB,KRT19,STMN1
CSF2		cytokine	Activated	3.051	bias	0.0016	BAX,CDCA3,CDKN1A,CENPE,EPCAM,JAK2,MKI67,ODC1,PHGDH,RBM3,STMN1	56 (5)
cyclosporin A		biologic drug		0.227	bias	0.00163	BAX,CDK4,CDKN1A,GPX2,ODC1,PPIA,RBM3,SERPINH1,SNRNP70,YWHAH	76 (15)
IGF2BP1		translation regulator				0.00171	CDKN1A,LGALS1,SERPINH1
JAK1/2		group	Activated	2	bias	0.00174	CTXN1,FAM81A,NPTXR,PSMB9
methylprednisolone		chemical drug		1.207		0.00178	ADCY6,CCNG1,CDKN1A,DYNLL1,EPHX1,HSP90B1,JAK2,KRT19,MGMT,ODC1,PPIL3
geneticin		chemical toxicant				0.0018	BAX,CDKN1A
bendamustine		chemical drug				0.0018	BAX,CDKN1A	12 (5)
RASSF6		other				0.0018	BAX,CDKN1A
TIP60		complex				0.0018	BAX,CDKN1A	46 (5)
BANP		other				0.0018	BAX,CDKN1A
genipin		chemical - endogenous non-mammalian				0.0018	CDK4,CDKN1A
NELFA		other				0.0018	CCNB2,CDKN1A
tangeretin		chemical - endogenous non-mammalian				0.0018	BAX,CDKN1A	39 (5)
bardoxolone		chemical drug				0.00187	CDKN1A,EPHX1,TXNRD1
honokiol		chemical - endogenous non-mammalian				0.00187	BAX,CDK4,CDKN1A
E2F3		transcription regulator		1	bias	0.00188	CCNB2,CDCA3,CDKN1A,HMGB2,PDS5A,SERPINH1	47 (7)
lipopolysaccharide		chemical drug	Activated	2.93	bias	0.00203	ASCC3,BAX,CCNB2,CDK4,CDKN1A,DUSP16,ELAVL1,HLA-A,HMGB2,HSP90B1,JAK2,KCNK1,LGALS1,Marcks,MKI67,NUCB1,NUPR1,ODC1,PPIA,PSMB9,RPS19,SERPINH1,STMN1,Tmsb4x (includes others),TSC22D1,TXN	71 (12)
TERC		other				0.00203	CDKN1A,H1-0,NUPR1
ING1		transcription regulator				0.00203	BAX,CDKN1A,JAK2
ERK		group	Activated	2	bias	0.00215	ACSL5,BAX,CDK4,CDKN1A,CKS2,MCAM,ODC1	62 (11)
LATS2		kinase				0.00221	CDKN1A,EPCAM,KRT19
CAMK2N2		other				0.00224	BAX,CDKN1A
TRPM8		ion channel				0.00224	GPX2,RBM3
ANG		enzyme				0.00224	BAX,CDKN1A	7 (3)
TSG101		transcription regulator				0.00224	CDKN1A,STMN1
COPS8		other				0.00224	CDK4,CDKN1A
HDAC8		transcription regulator				0.00224	BAX,CDKN1A
quinidine		chemical drug				0.00224	CDK4,CDKN1A
CBR-470-1		chemical - kinase inhibitor				0.00224	TXN,TXNRD1	12 (2)
MYOD1		transcription regulator				0.00225	ACSL5,CCNB2,CDCA3,CDKN1A,CENPE,CENPF,MKI67	15 (2)
CD3		complex	Activated	2.626	bias	0.00236	CDK4,CENPF,CKS2,EBP,HSP90B1,JAK2,ODC1,PFN1,PTP4A2,RBM3,STMN1,TXNRD1	17 (2)
nafenopin		chemical drug				0.00239	CDK4,CELA2A,HSP90B1
IRF1		transcription regulator	Activated	2.186	bias	0.0024	BAX,CDK4,CDKN1A,JAK2,ODC1,PSMB9	10 (3)
ATF4		transcription regulator	Activated	2.415	bias	0.00247	ATF5,CANX,CDKN1A,HSP90B1,NUPR1,PHGDH
HTT		transcription regulator				0.00255	CANX,CDKN1A,COX6B2,HMGB2,Marcks,MCAM,PFN1,PSMB9,SERPINH1,SLC25A24,STMN1,Tmsb4x (includes others),VAPB	52 (7)
N-Ac-Leu-Leu-norleucinal		chemical - protease inhibitor		-0.103	bias	0.00269	BAX,CDKN1A,HLA-A,STMN1	63 (11)
L-serine		chemical - endogenous mammalian				0.00272	CDKN1A,PHGDH
TASP1		peptidase				0.00272	CCNB2,CDKN1A
TRIM25		transcription regulator				0.00272	BAX,CDKN1A
miR-378a-3p (and other miRNAs w/seed CUGGACU)		mature microRNA				0.00272	CDK4,ODC1
TWIST		group				0.00272	CDKN1A,SERPINH1
FANCD2		other				0.00272	CDKN1A,TXNRD1
UBR5		enzyme				0.00272	BAX,CDKN1A	11 (3)
puerarin		chemical drug				0.00272	BAX,TXN
adaphostin		chemical drug				0.00272	CDK4,CDKN1A
mir-8		microRNA		-0.447	bias	0.00274	BAX,CDKN1A,EPCAM,GNA13,KCNK1,KRT19
NSUN6		enzyme				0.00278	HEXB,PHGDH,STMN1
GAST		other		1.944	bias	0.00282	HMGB2,JAK2,ODC1,RPS19
GnRH analog		biologic drug		0		0.00289	CENPF,DDOST,DYNLL1,MGMT,MKI67,PABPC1,PPIA,RPGR
calcitriol		chemical drug		-0.396		0.00306	BAX,CDKN1A,H2AZ1,Hmgn2 (includes others),LGALS1,NUPR1,ODC1,PPP1CA,SLC25A36,STMN1,TXN	11 (2)
PAX3		transcription regulator				0.00311	CDKN1A,EIF2S1,HSPG2,MCAM,PHGDH,TSC22D1
SOD1		enzyme				0.00311	BAX,CCNT1,CDK4,RBM3,STMN1,Tmsb4x (includes others),VAPB	14 (4)
JUN		transcription regulator		-0.056	bias	0.00315	BAX,CDKN1A,Crip2,SERP1,SNRNP70,SRP19,STMN1,Tmsb4x (includes others),TXN,WNT4	66 (9)
n-nitrosomethylbenzylamine		chemical toxicant				0.00319	BAX,CDK4,H2AZ1,PHGDH,YWHAH
DDB2		other				0.00325	BAX,CDKN1A	57 (6)
quinacrine		chemical drug				0.00325	BAX,CDKN1A	57 (6)
zinostatin		biologic drug				0.00325	BAX,CDKN1A	12 (5)
androstenediol		chemical - endogenous mammalian				0.00325	BAX,CDKN1A
EGFR		kinase		1.081	bias	0.00335	BAX,CDK4,CDKN1A,HSP90B1,NUDC,ODC1,PABPC1,PPIA,WNT4	42 (6)
NRG1		growth factor		1.992	bias	0.00352	ARHGEF2,CDKN1A,CKS2,HEXB,LSM1,PHGDH,STMN1
VEGFB		growth factor				0.00368	BAX,GPX2,TXNRD1
levodopa		chemical - endogenous mammalian		0.093		0.00368	BAX,C9orf24,CTXN1,DDOST,FAM81A,GNA13,HEXB,HLA-A,HTATIP2,KCNK1,MAPKAP1,PGPEP1
SOCS1		other		-1.124	bias	0.00372	BAX,CDK4,CDKN1A,JAK2,TXN	63 (12)
etoposide		chemical drug		0.326	bias	0.00378	BAX,CDK4,CDKN1A,JAK2,KCNK1,ODC1	46 (11)
ELAVL1	0.338	other		1.981	bias	0.00378	CDKN1A,CENPE,ELAVL1,HLA-A,TP53INP1,VAPB
AREG		growth factor	Activated	2	bias	0.0038	CCNB2,CENPF,MKI67,TXNRD1
NEDD9		other	Inhibited	-2		0.0038	DNALI1,NEK5,RPGR,SPA17
HBP1		transcription regulator				0.00383	CDKN1A,H1-0
UGCG		enzyme				0.00383	BAX,CDKN1A
SERPINB5		other				0.00383	BAX,CDKN1A
RPL22		translation regulator				0.00383	BAX,CDKN1A
cytochalasin B		chemical toxicant				0.00383	CDKN1A,MCAM
methyl methanesulfonate		chemical toxicant				0.00392	CCNG1,CDKN1A,TP53INP1	6 (2)
CDK4	0.487	kinase				0.00394	CDK4,CDKN1A,CENPF,ELAVL1,TP53INP1	57 (6)
sulforafan		chemical drug				0.00394	BAX,CDKN1A,EPHX1,GPX2,TXNRD1	49 (10)
MAX		transcription regulator				0.00395	BAX,CDK4,CDKN1A,ODC1	12 (2)
niacinamide		chemical - endogenous mammalian		1		0.00395	BAX,CDK4,CDKN1A,H2AZ1	50 (9)
4-phenylbutyric acid		chemical - endogenous mammalian		0.277		0.00395	CDKN1A,EPHX1,HLA-A,HSP90B1
HIF1A		transcription regulator		1.682	bias	0.00416	BAX,CCNT1,CDKN1A,KRT19,LGALS1,MGMT,NUDCD2,PPIA,TXN
thymoquinone		chemical drug				0.00418	BAX,CDK4,CDKN1A	39 (5)
miR-483-3p (miRNAs w/seed CACUCCU)		mature microRNA				0.00418	CENPF,MKI67,TVP23B
temozolomide		chemical drug				0.00418	BAX,CDKN1A,MGMT	47 (8)
2-amino-1-methyl-6-phenylimidazo-4-5-b-pyridine		chemical toxicant				0.00418	BAX,CDK4,PSMB9
GON4L		transcription regulator				0.00444	CCNB2,MKI67
dihydroartemisinin		chemical drug				0.00444	CDK4,CDKN1A
Ahr-aryl hydrocarbon-Arnt		complex				0.00444	BAX,CDKN1A
Ptprd		phosphatase				0.00444	CDKN1A,PSMB9
ID4		transcription regulator				0.00444	BAX,CDKN1A
manganese		chemical - endogenous mammalian				0.00444	CDKN1A,HSP90B1
zVAD-FMK		chemical - protease inhibitor				0.00445	CDK4,CDKN1A,PSMB9	10 (4)
IGF1R		transmembrane receptor				0.00446	BAX,CALU,CDKN1A,CKS2,KRT19,RBM3,TXN	66 (13)
dextran sulfate		chemical drug				0.00463	CDCA3,CENPE,MKI67,ODC1,PHGDH,STMN1,WNT4
mir-21		microRNA	Inhibited	-2.6	bias	0.00472	CANX,CDKN1A,CKS2,COPG1,JAK2,MKI67,STMN1
YY1		transcription regulator				0.00472	ABCE1,CCNB2,CDCA3,CDKN1A,CENPE,MKI67,TP53INP1
MEN1		transcription regulator				0.00473	CCNB2,CDK4,CDKN1A	38 (6)
26s Proteasome		complex		-0.063	bias	0.00496	ATF5,BAX,CDKN1A,CENPE,HMGB2	34 (8)
aldesleukin		biologic drug				0.00502	CANX,JAK2,PSMB9
CLCN5		ion channel				0.0051	MKI67,TXN
TAP1		transporter				0.0051	HLA-A,PSMB9
ZBTB33		transcription regulator				0.0051	BAX,CDKN1A
PNN		other				0.0051	CDK4,CDKN1A
miR-129-5p (and other miRNAs w/seed UUUUUGC)		mature microRNA				0.0051	PDS5A,TP53INP1
SP2		transcription regulator				0.0051	CDKN1A,SERPINH1
TOPBP1		other				0.0051	BAX,CDKN1A	65 (12)
monorden		chemical - endogenous non-mammalian				0.0051	BAX,HSP90B1
N-ethyl-N-nitrosourea		chemical toxicant				0.0051	BAX,CDKN1A
asiatic acid		chemical reagent				0.0051	BAX,CDKN1A	57 (7)
deguelin		chemical drug				0.0051	BAX,CDKN1A
17-alpha-ethinylestradiol		chemical drug				0.00552	CDKN1A,KRT19,ODC1,SERPINH1,WNT4
RGS2		enzyme	Inhibited	-2	bias	0.00577	CHMP4B,HEXB,Hmgn2 (includes others),HSP90B1
epothilone B		chemical drug				0.0058	CDKN1A,MKI67
ZNF148		transcription regulator				0.0058	CDKN1A,ODC1
RAPGEF1		other				0.0058	CDKN1A,SNRNP70
BHLHA15		transcription regulator				0.0058	KRT19,NUPR1
4-nitroquinoline-1-oxide		chemical toxicant				0.0058	CCNB2,CDKN1A
PLK1		kinase				0.00595	BAX,CDKN1A,MGMT	37 (13)
9,10-dimethyl-1,2-benzanthracene		chemical toxicant				0.00595	BAX,CDKN1A,EPHX1
Pdgf (complex)		complex				0.00597	BAX,CDKN1A,EIF2S1,ODC1	53 (10)
CYP1A1		enzyme				0.00597	COX6B2,KRT19,ODC1,TSC22D1
AGN194204		chemical drug				0.00604	CDKN1A,Crip2,H2AZ1,Hmgn2 (includes others),LGALS1,MKI67
tretinoin		chemical - endogenous mammalian		-0.285	bias	0.00627	ABCE1,CCNG1,CDK4,CDKN1A,CKS2,DYNLL1,EPCAM,EPHX1,GNA13,GPX2,HLA-A,JAK2,KRT19,LGALS1,LZTFL1,Marcks,ODC1,PFN1,PSMB9,RPS19,SLC25A36	63 (8)
MXI1		transcription regulator				0.00655	MKI67,ODC1
PARK7		enzyme				0.00655	BAX,TXN	9 (2)
isoliquiritigenin		chemical - endogenous non-mammalian				0.00655	BAX,CDKN1A	38 (13)
nimodipine		chemical drug				0.00655	BAX,ODC1
BAX	0.481	transporter				0.00662	BAX,CDKN1A,HLA-A	43 (9)
MMP1		peptidase				0.00698	BAX,CDK4,CDKN1A
CAF-1		complex				0.00721	MGMT
sn-1,2-didecanoylglycerol		chemical - endogenous mammalian				0.00721	ODC1
trilinolein		chemical - endogenous mammalian				0.00721	BAX
aucubin		chemical - endogenous non-mammalian				0.00721	BAX
beta-escin		chemical reagent				0.00721	CDKN1A
dichlorvos		chemical toxicant				0.00721	PPIA
Hdac1/2		group				0.00721	MKI67
Aspp		group				0.00721	BAX
etarotene		chemical reagent				0.00721	ODC1
3-tert-butyl-4-hydroxyanisole		chemical reagent				0.00721	EPHX1
HCG11		other				0.00721	CDKN1A
LINC00475		other				0.00721	CDKN1A
AEOL 10113		chemical drug				0.00721	BAX
ARMC10		other				0.00721	CDKN1A
SNORD21		other				0.00721	HLA-A
FKBPL		other				0.00721	CDKN1A
ZBTB7C		transcription regulator				0.00721	CDKN1A
AKIP1		other				0.00721	BAX
LMF1		other				0.00721	CANX
EBF4		transcription regulator				0.00721	CDKN1A
CXXC1		transcription regulator				0.00721	CDKN1A
ZBTB8A		other				0.00721	CDKN1A
ZNF667		transcription regulator				0.00721	BAX
PCLAF		other				0.00721	CDKN1A
LRRC4		other				0.00721	STMN1
7-bromoindirubin-3'-oxime		chemical - kinase inhibitor				0.00721	CDKN1A
inolitazone		chemical drug				0.00721	CDKN1A
CABLES1		other				0.00721	CDKN1A
PPP1R9B		enzyme				0.00721	PPP1CA
CDT1		other				0.00721	CDKN1A
ACVR2B		kinase				0.00721	CDKN1A
RGL1		other				0.00721	PPP1CA
RGS5		enzyme				0.00721	BAX
miR-523-3p (miRNAs w/seed AACGCGC)		mature microRNA				0.00721	CDKN1A
mir-198		microRNA				0.00721	CCNT1
EAF1		transcription regulator				0.00721	WNT4
ZBTB5		transcription regulator				0.00721	CDKN1A
DHX8		enzyme				0.00721	CDKN1A
DNASE1L3		enzyme				0.00721	CDKN1A
CCNI		other				0.00721	CDKN1A
FXYD1		ion channel				0.00721	CDKN1A
ING3		other				0.00721	CDKN1A
JADE1		transcription regulator				0.00721	CDKN1A
ribociclib		chemical drug				0.00721	MKI67
UBE2E1		enzyme				0.00721	CDKN1A
CUL9		other				0.00721	CDKN1A
dulanermin		biologic drug				0.00721	BAX
SCML2		transcription regulator				0.00721	CDKN1A
TDP-665759		chemical reagent				0.00721	CDKN1A
RO0281675		chemical reagent				0.00721	BAX
diisopropanolnitrosamine		chemical toxicant				0.00721	CDKN1A
NSC 126405		chemical reagent				0.00721	CDKN1A
agar		chemical - endogenous non-mammalian				0.00721	RBM3
caffeic acid phenethyl ester		chemical drug		0.132	bias	0.00732	BAX,CCNG1,CDKN1A,MKI67	47 (9)
glycine		chemical - endogenous mammalian				0.00733	CDKN1A,ODC1	41 (7)
telapristone acetate		chemical drug				0.00733	CCNB2,CENPF
MDM4		transcription regulator				0.00733	BAX,CDKN1A	72 (15)
AKR1B1		enzyme				0.00733	CDKN1A,MKI67	21 (3)
XPO1		transporter				0.00733	CDKN1A,ELAVL1	5 (2)
ellagic acid		chemical - endogenous non-mammalian				0.00733	BAX,CDKN1A	9 (2)
magnolol		chemical - endogenous non-mammalian				0.00733	BAX,CDKN1A	39 (5)
melphalan		chemical drug				0.00733	BAX,CDKN1A
CDK9		kinase				0.00734	CDKN1A,ODC1,Tmsb4x (includes others)
PLAG1		transcription regulator				0.00734	ATF5,KRT19,NPTXR
ADCYAP1		other		0		0.00756	ELAVL1,H2AZ1,Hmgn2 (includes others),MCAM,TSC22D1,TXNRD1
phenethyl isothiocyanate		chemical drug				0.00757	BAX,H2AZ1,TXN,TXNRD1
CD24		other				0.00781	CDKN1A,MCAM,PDS5A,TP53INP1
BCL2		transporter		-0.861	bias	0.00781	BAX,CCNG1,CDKN1A,MCAM	71 (15)
rituximab		biologic drug				0.00815	BAX,CDKN1A	39 (5)
MNT		transcription regulator				0.00815	CDK4,ODC1
ACTB		other				0.00815	CCNB2,STMN1
acetyl-L-carnitine		chemical - endogenous mammalian				0.00815	BAX,CDKN1A
thioridazine		chemical drug				0.00815	CDK4,CDKN1A
lycopene		chemical drug				0.00815	BAX,CDKN1A
magnesium		chemical - endogenous mammalian				0.00815	CDKN1A,PTP4A2
PSEN1		peptidase				0.00818	BAX,CANX,NUPR1,PPIA,RBM3,RPGR,STMN1,TXN
RRP1B		transcription regulator				0.00832	CCNB2,CCNG1,CDKN1A,RPS19
berberine		chemical drug				0.00832	BAX,CCNT1,CDK4,CDKN1A	69 (11)
indomethacin		chemical drug		0.314	bias	0.00834	BAX,CDKN1A,DYNLL1,GPX2,PSMB9,RBM3	59 (9)
CTNNB1		transcription regulator	Activated	2.183	bias	0.00837	CDKN1A,CRIP1,ELAVL1,EPCAM,GPX2,HTATIP2,PDAP1,PFN1,RPL41,RPS19,RPS27L,SNRNP70,TSC22D1,WNT4
trichloroethylene		chemical toxicant				0.0085	ATF5,CCNG1,Ptms
CD40LG		cytokine		1.664	bias	0.00866	ASCC3,ATF5,BAX,CCNG1,CDKN1A,EIF2S1,JAK2,PSMB9	41 (4)
IGF1		growth factor		1.139	bias	0.00876	BAX,CCNG1,CDK4,CDKN1A,MKI67,NUPR1,ODC1,PSMB9,WNT4	68 (14)
CREB1		transcription regulator		1.219	bias	0.00882	ATF5,CCNB2,CDKN1A,EBP,HLA-A,MCAM,MKI67,STMN1,STRBP,TXN
emodin		chemical drug				0.00891	BAX,CDKN1A,MKI67	48 (6)
KLF10		transcription regulator				0.00902	BAX,CDKN1A
AURKB		kinase				0.00902	BAX,CDKN1A
RND3		enzyme				0.00902	BAX,CDKN1A
TP53COR1		other				0.00902	BAX,TP53INP1
farnesol		chemical reagent				0.00902	CDKN1A,HSP90B1
FOS		transcription regulator		0	bias	0.00923	CALU,CCNG1,HSP90B1,HTATIP2,ODC1,PFN1,PTP4A2,STMN1,TXN,WNT4
ursolic acid		chemical drug				0.00933	BAX,CDKN1A,MKI67	39 (8)
bortezomib		chemical drug		1.673		0.00934	BAX,CDK4,CDKN1A,HSP90B1,ODC1,VAPB	19 (7)
SIRT1		transcription regulator	Inhibited	-2.611	bias	0.00969	BAX,CCNB2,CDKN1A,CPB1,H2AZ1,HLA-A,PSMB9,SNRNP70	46 (5)
vitamin D		chemical drug				0.00976	BAX,CDKN1A,MKI67	70 (12)
LIN9		other				0.00992	CDKN1A,CENPE
FOXF1		transcription regulator				0.00992	CDK4,CDKN1A
SMARCE1		transcription regulator				0.00992	CENPE,CENPF
MAFK		transcription regulator				0.00992	TXN,TXNRD1	12 (2)
NLRC5		transcription regulator				0.00992	HLA-A,PSMB9
DDX5		enzyme				0.00992	BAX,CDKN1A
BRCA1		transcription regulator		1.186	bias	0.00994	BAX,CCNB2,CCNG1,CDKN1A,ELAVL1	12 (6)
CSF1		cytokine		0.915	bias	0.0106	BAX,CDK4,CDKN1A,EBP,HLA-A,HSP90B1
4-hydroxytamoxifen		chemical drug		1.455	bias	0.0106	BAX,CDKN1A,DYNLL1,KRT19,MKI67
OSMR		transmembrane receptor				0.0107	BAX,JAK2,PSMB9
maneb		chemical toxicant				0.0107	BAX,CEP290,STRBP
CCND1		transcription regulator		0.686		0.0108	ARHGEF2,CALU,CDK4,CDKN1A,CENPF,ELAVL1,TP53INP1
SALL4		transcription regulator				0.0109	EPCAM,KRT19
EIF4G2		translation regulator				0.0109	CDKN1A,KRT19
TRPC1		ion channel				0.0109	BAX,CDKN1A
MAP3K5		kinase				0.0109	BAX,CDKN1A
EPCAM	0.986	other				0.0109	CDKN1A,EPCAM
aphidicolin		chemical toxicant				0.0109	BAX,CDKN1A
mezerein		chemical - endogenous non-mammalian				0.0109	CDKN1A,TXNRD1
wogonin		chemical - endogenous non-mammalian				0.0109	CDK4,CDKN1A
beta-glycerophosphoric acid		chemical - endogenous mammalian				0.0109	CCNB2,CDKN1A
paraquat		chemical toxicant				0.0109	BAX,CEP290,STRBP,TXN
15-deoxy-delta-12,14 -PGJ 2		chemical - endogenous mammalian		1.31	bias	0.0113	BAX,CCNG1,CDK4,CDKN1A,TXNRD1
PTGS2		enzyme		0.751	bias	0.0113	BAX,CDKN1A,DYNLL1,MKI67,RPS19
azoxymethane		chemical toxicant				0.0116	CDKN1A,MKI67,ODC1
sulindac		chemical drug				0.0116	CCNB2,CCNG1,CDKN1A
ADCY		group				0.0118	CDKN1A,TXN
ALDH2		enzyme				0.0118	ATF5,PHGDH
COPS5		transcription regulator				0.0118	BAX,CDKN1A
SKI		transcription regulator				0.0118	CDKN1A,ODC1
PHB		transcription regulator				0.0118	BAX,CDK4
FOXF2		transcription regulator				0.0118	CDK4,CDKN1A
interferon beta-1a		biologic drug				0.0119	JAK2,LGALS1,PPIA,RPS19
hydroxyurea		chemical drug				0.0121	BAX,CDKN1A,MCAM
5-fluorouracil		chemical drug		0.158		0.0122	BAX,CALU,CANX,CCNG1,CDKN1A,RPS27L,TSC22D1
RACK1		enzyme				0.0129	BAX,CDKN1A
TGFB1I1		transcription regulator				0.0129	CDKN1A,KRT19
Cdkn1c		other				0.0129	BAX,CDKN1A
RUNX2		transcription regulator				0.0129	BAX,CDKN1A,CREB3,MKI67
TSC1		other				0.0131	BAX,GPX2,MKI67
INHBA		growth factor		0.753	bias	0.0131	BAX,CDK4,CDKN1A,CHMP4B,STRBP
FGF1		growth factor		-0.083		0.0132	CDKN1A,CELA2A,MKI67,ODC1
celecoxib		chemical drug				0.0132	BAX,CDKN1A,CENPF,MKI67
camptothecin		chemical drug		1.298	bias	0.0132	BAX,CCNG1,CDK4,CDKN1A,HLA-A,MGMT,PPIA,PSMB9,PTP4A2,TP53INP1
tanespimycin		chemical drug		-0.453	bias	0.0136	CDK4,CDKN1A,HSP90B1,SERPINH1
SPDEF		transcription regulator				0.0136	CDKN1A,CYFIP1,STMN1
AR		ligand-dependent nuclear receptor	Activated	2.578	bias	0.0137	CALU,CDKN1A,CENPE,EBP,EPHX1,Marcks,NUPR1,ODC1,SERP1
TRA		transmembrane receptor				0.0139	BAX,CDKN1A
SOX6		transcription regulator				0.0139	CDKN1A,HSPG2
HEXIM1		transcription regulator				0.0139	CDKN1A,Tmsb4x (includes others)
XIAP		enzyme				0.0139	CDK4,CDKN1A
NMU		other				0.0139	CDCA3,MKI67
UCN-01		chemical drug				0.0139	CDK4,CDKN1A
IL4		cytokine	Activated	2.566	bias	0.0139	ASCC3,BAX,CDKN1A,CENPB,CRIP1,EIF2S1,EPHX1,H1-0,JAK2,KIF3A,LGALS1,MKI67,PDS5A,TOP3B
IRF2		transcription regulator				0.0139	CDKN1A,CLIC1,PSMB9,TXNRD1
NFYB		transcription regulator				0.014	CCNB2,CENPF,CKS2,ELAVL1,HMGB2,RPL41
JAK1		kinase				0.0142	CDKN1A,HLA-A,PSMB9
2-deoxyglucose		chemical drug				0.0142	CDKN1A,HSP90B1,ODC1
Npm		group				0.0144	CDKN1A
L-ornithine		chemical - endogenous mammalian				0.0144	CDKN1A
arbutin		chemical drug				0.0144	CDKN1A
opioid receptor		group				0.0144	TXN
Mellitin		chemical - endogenous non-mammalian				0.0144	BAX
VX-944		chemical drug				0.0144	BAX
atiprimod		chemical drug				0.0144	BAX
chartreusin		chemical reagent				0.0144	CDKN1A
Max-Myc		complex				0.0144	ODC1
USP42		peptidase				0.0144	CDKN1A
RBMS3		other				0.0144	CDK4
NSA2		other				0.0144	CDKN1A
FBXL12		other				0.0144	CDKN1A
PCDH9		other				0.0144	BAX
DNTTIP1		ligand-dependent nuclear receptor				0.0144	CREB3
SPINK7		other				0.0144	ELAVL1
ZBTB49		transcription regulator				0.0144	CDKN1A
RNF126		enzyme				0.0144	CDKN1A
WDR13		other				0.0144	CDKN1A
MIR31HG		other				0.0144	CDKN1A
Raet1a		other				0.0144	HLA-A
Gm-Csf Receptor		complex				0.0144	JAK2
Importin alpha		group				0.0144	CDKN1A
ACER3		enzyme				0.0144	CDKN1A
soy isoflavones		chemical drug				0.0144	MKI67
VTRNA2-1		other				0.0144	BAX
bucillamine		chemical drug				0.0144	BAX
ZMAT3		other				0.0144	BAX
safflor yellow B		chemical - endogenous non-mammalian				0.0144	BAX
AP1M1		transporter				0.0144	HLA-A
OAZ1		enzyme				0.0144	ODC1
NEFH		other				0.0144	CDK4
CELA1		peptidase				0.0144	HLA-A
HPGD		enzyme				0.0144	CDKN1A
CCNB1		kinase				0.0144	CCNB2
KLHL40		other				0.0144	TP53INP1
AMD1		enzyme				0.0144	Tmsb4x (includes others)
miR-637 (and other miRNAs w/seed CUGGGGG)		mature microRNA				0.0144	NUPR1
mir-663		microRNA				0.0144	HSPG2
ELAC2		enzyme				0.0144	CDKN1A
Raet1d/Raet1e		other				0.0144	HLA-A
MAGEA4		other				0.0144	CDKN1A
POLDIP3		other				0.0144	CDKN1A
TSPYL2		other				0.0144	CDKN1A
PEX2		other				0.0144	CDKN1A
PLIN3		other				0.0144	BAX
NASP		other				0.0144	CDKN1A
CCT5		other				0.0144	CDKN1A
DDX24		enzyme				0.0144	CDKN1A
MXD4		transcription regulator				0.0144	ODC1
PGAM1		phosphatase				0.0144	CDKN1A
ING5		other				0.0144	CDKN1A
KHDRBS2		other				0.0144	CDKN1A
cycloastragenol		chemical reagent				0.0144	CDKN1A
GALR2		G-protein coupled receptor				0.0144	CDKN1A
PCBP4		other				0.0144	CDKN1A
PRIMA1		other				0.0144	BAX
PDIA6		enzyme				0.0144	HSP90B1
CGGBP1		transcription regulator				0.0144	CDKN1A
LOC100359583/Ptma		other				0.0144	BAX
CRTAP		other				0.0144	CDKN1A
Cops2		transcription regulator				0.0144	CDKN1A
MI-63		chemical reagent				0.0144	CDKN1A
DUOX2		enzyme				0.0144	CDKN1A
ZFYVE16		other				0.0144	CDKN1A
securinine		chemical reagent				0.0144	CDKN1A
S7		chemical - kinase inhibitor				0.0144	BAX
SI163		chemical - kinase inhibitor				0.0144	BAX
S29		chemical - kinase inhibitor				0.0144	BAX
reactive nitrogen species		chemical - other				0.0144	BAX
polyethylene glycol		chemical drug				0.0144	CDKN1A
daphnoretin		chemical - endogenous non-mammalian				0.0144	BAX
telomestatin		chemical - endogenous non-mammalian				0.0144	CDKN1A
ephedrine		chemical drug				0.0144	TXN
kynurenic acid		chemical - endogenous mammalian				0.0144	CDKN1A
XK469		chemical drug				0.0144	BAX
AN-207		chemical toxicant				0.0144	BAX
glyoxal		chemical toxicant				0.0144	BAX
oxazepam		chemical drug				0.0144	TSC22D1
SSR180575		chemical drug				0.0144	BAX
1-o-hexadecyl-2-o-methyl-rac-glycerol		chemical - kinase inhibitor				0.0144	CDKN1A
4-nitrophenol		chemical - endogenous mammalian				0.0144	BAX
hdm-2 antagonistic peptide		chemical reagent				0.0144	CDKN1A
isoalantolactone		chemical - endogenous non-mammalian				0.0144	BAX
teleocidins		chemical toxicant				0.0144	ODC1
swainsonine		chemical - endogenous non-mammalian				0.0144	BAX
vinflunine		chemical drug				0.0144	CDKN1A
N(omega)-hydroxyarginine		chemical - endogenous mammalian				0.0144	CDKN1A
vorinostat		chemical drug		-0.165		0.0145	BAX,CDK4,CDKN1A,ELAVL1,MKI67,TXN
sulindac sulfide		chemical drug				0.0147	CDKN1A,DYNLL1,KRT19
entinostat		chemical drug				0.0147	BAX,CDKN1A,TXN
DCAF1		kinase				0.015	CDKN1A,CENPF
E2F5		transcription regulator				0.015	BAX,CDKN1A
Trp53cor1		other				0.015	BAX,CDKN1A
miR-24-3p (and other miRNAs w/seed GGCUCAG)		mature microRNA				0.015	BAX,CDK4
FGF9		growth factor				0.015	BAX,WNT4
diazoxide		chemical drug				0.015	BAX,ODC1
calyculin A		chemical toxicant				0.015	CDKN1A,ODC1
arotinoid acid		chemical toxicant				0.015	CDKN1A,ODC1
amino acids		chemical - endogenous mammalian				0.015	ELAVL1,ODC1
YAP1		transcription regulator				0.0152	BAX,CDKN1A,NUPR1,RPL41,RPS19,RPS27L
ATM		kinase				0.0153	BAX,CDK4,CDKN1A
silibinin		chemical drug				0.0153	BAX,CDK4,CDKN1A
pirinixic acid		chemical toxicant	Activated	2.379	bias	0.0158	ACSL5,BAX,CCNT1,CDK4,CDKN1A,DYNLL1,Hmgn2 (includes others),TXN
sodium selenite		chemical drug				0.0161	BAX,GPX2
p70 S6k		group				0.0161	BAX,CDK4
WR 1065		chemical drug				0.0161	BAX,CDKN1A
U0126		chemical - kinase inhibitor		-1.58	bias	0.0161	ARHGEF2,BAX,CDK4,CDKN1A,EPCAM,PABPC1,TOP3B,TSC22D1,TXN
TNF		cytokine		1.787	bias	0.0162	BAX,CDK4,CDKN1A,CREB3,DUSP16,ELAVL1,EPCAM,HEXB,HLA-A,Hmgn2 (includes others),HSP90B1,HSPG2,MAPKAP1,MCAM,MGMT,ODC1,PHGDH,PSMB9,STMN1,TP53INP1,TXN,TXNRD1
ATN1		transcription regulator				0.0162	Marcks,MCAM,STMN1,Tmsb4x (includes others)
methamphetamine		chemical drug				0.0164	BAX,LGALS1,TXN
miR-141-3p (and other miRNAs w/seed AACACUG)		mature microRNA				0.017	BAX,EPCAM,KCNK1
NTRK2		kinase				0.017	CDCA3,CDK4,CDKN1A
cyclophosphamide		chemical drug				0.017	GPX2,ODC1,RBM3
cadmium		chemical toxicant				0.017	BAX,CDKN1A,EPHX1
IL2		cytokine		1.469	bias	0.0171	ARHGEF2,ATF5,BAX,CCNG1,CDK4,CDKN1A,HSP90B1,JAK2,MKI67,TP53INP1
TBX2		transcription regulator				0.0176	ATF5,CDCA3,CDKN1A
miR-26a-5p (and other miRNAs w/seed UCAAGUA)		mature microRNA				0.0185	CDK4,CDKN1A
HOXA7		transcription regulator				0.0185	Tmsb4x (includes others),TSC22D1
methylnitronitrosoguanidine		chemical toxicant				0.0185	BAX,CDKN1A
dicarbethoxydihydrocollidine		chemical toxicant				0.0185	CCNB2,KRT19
dichlorovinylcysteine		chemical toxicant				0.0185	CDK4,ODC1
NFkB (complex)		complex		1.783	bias	0.0188	ALDH7A1,BAX,CCNB2,CDKN1A,CREB3,EPCAM,HLA-A,KRT19,ODC1,PSMB9
PRKCE		kinase				0.0189	BAX,CDKN1A,ODC1
MDM2		transcription regulator				0.0189	BAX,CDK4,CDKN1A
GNA12		enzyme				0.0189	GNA13,PPP1CA,TXNRD1
PRNP		other				0.0189	BAX,EIF2S1,HSP90B1
rottlerin		chemical toxicant				0.0189	BAX,CDK4,CDKN1A
ERN1		kinase				0.0192	EPCAM,HSP90B1,SRP19,SURF4
triptolide		chemical drug		-0.468	bias	0.0192	BAX,CDKN1A,MCAM,MKI67
PTPN11		phosphatase				0.0195	BAX,CCNG1,CDKN1A
KLF6		transcription regulator				0.0195	CDKN1A,MKI67,SERPINH1
ADRB		group		-0.849	bias	0.0196	ATF5,BAX,CDK4,CDKN1A
ID2		transcription regulator				0.0196	CCNG1,CDK4,CDKN1A,JAK2,LGALS1
simvastatin		chemical drug		-0.878		0.0196	ARHGEF2,BAX,CDKN1A,ELAVL1,MKI67
tosedostat		chemical drug				0.0197	ATF5,CDKN1A
LLGL2		other				0.0197	HEXB,STMN1
CASP3		peptidase				0.0197	BAX,CDKN1A
AGTR2		G-protein coupled receptor				0.0197	BAX,CDK4
ferulic acid		chemical - endogenous non-mammalian				0.0197	CDKN1A,MKI67
urethane		chemical toxicant				0.0197	CDK4,CDKN1A
R-WIN 55,212		chemical reagent				0.0197	BAX,CDK4
PML-RARA		fusion gene/product				0.0197	CDKN1A,PSMB9
fingolimod		chemical drug				0.0202	BAX,CDK4,CDKN1A
EPO		cytokine		1.71	bias	0.0203	BAX,CDKN1A,CLIC1,H2AZ1,NUPR1,RCC2
apigenin		chemical - endogenous non-mammalian				0.0208	BAX,CDK4,CDKN1A
CLU		other				0.021	BAX,CDKN1A
IFRD1		other				0.021	EBP,PPIA
bufalin		chemical reagent				0.021	CDK4,YWHAH
AKT1		kinase				0.0213	BAX,CDK4,CDKN1A,CKS2,EBP,HMGB2
tetrachlorodibenzodioxin		chemical toxicant				0.0214	BAX,CDKN1A,JAK2,KRT19,ODC1,SERPINH1,TXN
OSM		cytokine		0.407	bias	0.0214	ACSL5,ARHGEF2,CDKN1A,EPCAM,HLA-A,KRT19,MGMT,PDAP1,PSMB9
L-tyrosine		chemical - endogenous mammalian				0.0215	BAX
beryllium sulfate		chemical toxicant				0.0215	CDKN1A
H. carbonum toxin		biologic drug				0.0215	CDKN1A
(diaminocyclohexane)(diacetato)(dichloro)platinum		chemical reagent				0.0215	CDKN1A
WDR82		other				0.0215	CDKN1A
celiprolol		chemical drug				0.0215	DYNLL1
TFIIH		complex				0.0215	CDKN1A
diosmin		chemical drug				0.0215	BAX
MLN8054		chemical drug				0.0215	CDKN1A
prochloraz		chemical reagent				0.0215	ODC1
KDM4D		enzyme				0.0215	CDKN1A
RHOBTB2		enzyme				0.0215	CDKN1A
RFFL		enzyme				0.0215	CDKN1A
PTPMT1		phosphatase				0.0215	CDKN1A
BIRC6		enzyme				0.0215	BAX
ZNF451		enzyme				0.0215	CDKN1A
PYHIN1		other				0.0215	CDKN1A
LAPTM4B		other				0.0215	BAX
N4BP2L2		transcription regulator				0.0215	CDKN1A
CTBP1-DT		other				0.0215	CDKN1A
EXOC3L1		other				0.0215	CDKN1A
CKLF		cytokine				0.0215	BAX
SDF4		other				0.0215	BAX
OLA1		enzyme				0.0215	CDKN1A
Ap1 gamma		group				0.0215	HLA-A
TH17 Cytokine		group				0.0215	LGALS1
isoleucine		chemical - endogenous mammalian				0.0215	CDKN1A
GEM231		chemical drug				0.0215	BAX
cerebrolysin		chemical drug				0.0215	BAX
YEATS4		transcription regulator				0.0215	CDKN1A
Raet1b		other				0.0215	HLA-A
TERF1		transcription regulator				0.0215	CDKN1A
SERTAD1		transcription regulator				0.0215	CDK4
ELL		transcription regulator				0.0215	CDKN1A
PMEPA1		other				0.0215	CDKN1A
MCRS1		other				0.0215	CDKN1A
U2AF2		other				0.0215	CDKN1A
CUL4A		other				0.0215	CDKN1A
miR-743b-3p (and other miRNAs w/seed AAAGACA)		mature microRNA				0.0215	CYFIP1
miR-139-3p (miRNAs w/seed GGAGACG)		mature microRNA				0.0215	ELAVL1
H60a		other				0.0215	HLA-A
ARHGAP1		other				0.0215	CDKN1A
KLF16		transcription regulator				0.0215	CDKN1A
IFI30		enzyme				0.0215	HLA-A
SRCAP		transcription regulator				0.0215	CDKN1A
EID2		other				0.0215	CDKN1A
SYF2		other				0.0215	CDKN1A
PDZD2		other				0.0215	CDKN1A
HTR6		G-protein coupled receptor				0.0215	KIF3A
TRERF1		transcription regulator				0.0215	CDKN1A
CCNL2		other				0.0215	BAX
SPAG9		other				0.0215	CDKN1A
RASSF7		other				0.0215	CDKN1A
ELOA		transcription regulator				0.0215	CDKN1A
CIAPIN1		other				0.0215	JAK2
HES6		transcription regulator				0.0215	CDKN1A
RACGAP1		transporter				0.0215	CDKN1A
BUB3		other				0.0215	CDKN1A
TCP1		other				0.0215	CDKN1A
8-butyl-10-[(3-methoxy-5-pyrrol-2-ylidenepyrrol-2-ylidene)methyl]-11-azabicyclo[7.2.1]dodeca-1(12),9-diene		chemical reagent				0.0215	CDKN1A
MXD3		transcription regulator				0.0215	ODC1
MT3		other				0.0215	BAX
GIMAP1-GIMAP5		other				0.0215	HSP90B1
(+)-R-3-(4-chlorophenyl)-3-(1-hydroxymethylcyclopropylmethoxy)-2-(4-nitrobenzyl)-2,3-dihydroisoindol-1-one		chemical reagent				0.0215	CDKN1A
JMY		transcription regulator				0.0215	BAX
beta2 adrenergic receptor agonist		chemical drug				0.0215	CDKN1A
O-(chloroacetylcarbamoyl)fumagillol		chemical drug				0.0215	CDKN1A
4-vinyl-1-cyclohexene dioxide		chemical toxicant				0.0215	BAX
dephostatin		chemical reagent				0.0215	CDKN1A
NSC 644221		chemical reagent				0.0215	CDKN1A
10-decarbamoylmitomycin C		chemical toxicant				0.0215	CDKN1A
idronoxil		chemical drug				0.0215	CDKN1A
NSC63002		chemical - kinase inhibitor				0.0215	CDK4
NSC43067		chemical - kinase inhibitor				0.0215	CDK4
NSC269621		chemical - kinase inhibitor				0.0215	CDK4
lanthanum chloride		chemical reagent				0.0215	BAX
lead nitrate		chemical toxicant				0.0215	BAX
imisopasem manganese		chemical drug				0.0215	BAX
SYUIQ-5		chemical reagent				0.0215	CDKN1A
Schiff base zinc (II) derivative complex		chemical reagent				0.0215	BAX
atosiban		biologic drug				0.0215	CDKN1A
10-hydroxycamptothecin		chemical - endogenous mammalian				0.0215	BAX
HNRNPA2B1		other				0.022	ACSL5,CRIP1,PRSS3,WNT4
AICAR		chemical - endogenous mammalian				0.0222	BAX,CDKN1A,MKI67
grape seed extract		chemical drug				0.0222	CDKN1A,MKI67
ITCH		enzyme				0.0222	CCNB2,PHGDH
PRKCZ		kinase				0.0222	BAX,PHGDH
TRB		transmembrane receptor				0.0222	BAX,CDKN1A
selenium		chemical drug				0.0222	CDKN1A,TXNRD1
CD40		transmembrane receptor				0.0226	BAX,CDK4,CDKN1A,HSP90B1,PSMB9
phenobarbital		chemical drug				0.0229	CDKN1A,EPHX1,KCNK1
Histone h4		group				0.023	CDK4,CDKN1A,DUSP16,MGMT
PD98059		chemical - kinase inhibitor		-1.55	bias	0.023	BAX,CDKN1A,KRT19,MKI67,ODC1,PABPC1,PRSS3,TSC22D1,TXN
IL1B		cytokine		-0.311	bias	0.0234	ALDH7A1,ATF5,BAX,CDKN1A,ELAVL1,HEXB,HLA-A,Hmgn2 (includes others),HSPG2,KRT19,ODC1,PSMB9,SERPINH1
RAB1B		other				0.0236	COPG1,SERP1
ITGAV		transmembrane receptor				0.0236	BAX,CDKN1A
NPPB		other				0.0236	BAX,EBP
mir-25		microRNA				0.0236	BAX,CDKN1A
mir-22		microRNA				0.0236	CDKN1A,TP53INP1
valproic acid		chemical drug		0.726		0.0237	CDKN1A,EIF2S1,Marcks,MGMT,PSMB9,SERP1,SERPINH1,YWHAH
NR1H3		ligand-dependent nuclear receptor				0.0238	CCNB2,CDCA3,CDKN1A,CENPF,MKI67
PAX3-FOXO1		fusion gene/product		-0.447		0.0238	CCNG1,CDKN1A,CLIC1,CREB3,MCAM
PIK3R1		kinase				0.0244	ATF5,HSP90B1,MKI67
HMGB1		transcription regulator				0.0244	BAX,CCNG1,CDKN1A
H89		chemical - kinase inhibitor		-0.577	bias	0.0245	BAX,CDKN1A,MKI67,TXN
ANXA2		other				0.0249	BAX,CDKN1A
SELP		transmembrane receptor				0.0249	CDKN1A,GNA13
green tea polyphenol		chemical drug				0.0249	BAX,CDKN1A
daunorubicin		chemical drug				0.0249	BAX,CDKN1A
TFRC		transporter				0.0251	ATF5,CDKN1A,PHGDH
NFYA		transcription regulator				0.0251	CCNB2,CDKN1A,EPHX1
SNAI1		transcription regulator		-1		0.0261	CDK4,CDKN1A,EPCAM,SERPINH1
SKP2		other				0.0263	CDKN1A,ODC1
indole-3-carbinol		chemical drug				0.0263	BAX,CDKN1A
SN-38		chemical drug				0.0263	BAX,CDKN1A
nocodazole		chemical reagent				0.0266	CDK4,CDKN1A,PPP1CA
RASSF1		other				0.0274	CDKN1A,MGMT,TP53INP1
ETV6-RUNX1		fusion gene/product	Inhibited	-2.216	bias	0.0277	CLIC1,JAK2,LGALS1,MGMT,PSMB9,STMN1
TFDP1		transcription regulator				0.0277	CDKN1A,STMN1
IGFBP3		other				0.0277	BAX,CDKN1A
MMP2		peptidase				0.0277	CDKN1A,JAK2
mercuric chloride		chemical toxicant				0.0277	CDKN1A,TXN
IL6		cytokine		1.192	bias	0.0281	BAX,CCNB2,CDKN1A,CENPE,DUSP16,HLA-A,JAK2,LGALS1,MKI67,PSMB9,WNT4
TCF		group				0.0282	EPCAM,GPX2,TSC22D1
MED1		transcription regulator				0.0283	BAX,CDK4,CDKN1A,ODC1
choline plasmalogens		chemical - endogenous mammalian				0.0285	CDK4
L-alanine		chemical - endogenous mammalian				0.0285	CDKN1A
Ro 25-6760		chemical toxicant				0.0285	CDKN1A
inecalcitol		chemical drug				0.0285	CDKN1A
flavokawain A		chemical - endogenous non-mammalian				0.0285	BAX
CINP		other				0.0285	CDKN1A
USP28		peptidase				0.0285	CDKN1A
DNAJB4		other				0.0285	CDKN1A
CYP26B1		enzyme				0.0285	ATF5
MLK4B		other				0.0285	CDKN1A
SLC13A5		transporter				0.0285	CDKN1A
TEX11		other				0.0285	BAX
USP24		peptidase				0.0285	BAX
SLU7		enzyme				0.0285	CDKN1A
ORAI3		other				0.0285	CDK4
MUCL1		other				0.0285	CDKN1A
WNT9B		other				0.0285	WNT4
K Channel		complex				0.0285	CDKN1A
CDCA2		other				0.0285	CDKN1A
tetrahydrocurcumin		chemical - endogenous mammalian				0.0285	CDKN1A
P-TEFb		complex				0.0285	CDKN1A
asparagine		chemical - endogenous mammalian				0.0285	ODC1
danusertib		chemical drug				0.0285	CDKN1A
glucuronyl glucosamine glycan sulfate		chemical drug				0.0285	HSPG2
Nc2		complex				0.0285	HLA-A
LARP1		translation regulator				0.0285	PABPC1
CTSD		peptidase				0.0285	TXN
TLCD3A		other				0.0285	CDK4
ADRA2B		G-protein coupled receptor				0.0285	MKI67
CELA2A	0.452	peptidase				0.0285	CDKN1A
ANXA5		transporter				0.0285	CDKN1A
GRPR		G-protein coupled receptor				0.0285	CDKN1A
CALCR		G-protein coupled receptor				0.0285	CDKN1A
SYNM		other				0.0285	CDKN1A
HAS3		enzyme				0.0285	CDKN1A
TOP3A		enzyme				0.0285	CDKN1A
BOP1		other				0.0285	CDKN1A
SSTR5		G-protein coupled receptor				0.0285	MKI67
IL17B		cytokine				0.0285	CDKN1A
H3-3A/H3-3B		other				0.0285	CDKN1A
RAPSN		other				0.0285	JAK2
CANX	0.822	other				0.0285	BAX
CELF2		other				0.0285	BAX
KLF7		transcription regulator				0.0285	CDKN1A
EEF2K		kinase				0.0285	CDKN1A
LGALS2		other				0.0285	BAX
COL1A2		other				0.0285	CDKN1A
PLK3		kinase				0.0285	CDKN1A
PLAC8		other				0.0285	CDKN1A
SSTR3		G-protein coupled receptor				0.0285	KIF3A
CTH		enzyme				0.0285	CDKN1A
GNG13		enzyme				0.0285	CEP290
NEK2		kinase				0.0285	CDKN1A
PPP1CC		phosphatase				0.0285	BAX
S100A11		other				0.0285	CDKN1A
NBN		other				0.0285	CDKN1A
LOC105374325		other				0.0285	BAX
azurin 50-77		biologic drug				0.0285	CDKN1A
farnesyltransferase inhibitor		chemical drug				0.0285	CDKN1A
p38 MAP kinase inhibitor		chemical drug				0.0285	CDKN1A
benfur		chemical reagent				0.0285	CDKN1A
phenylacetic acid		chemical - endogenous mammalian				0.0285	HLA-A
tirapazamine		chemical drug				0.0285	CDKN1A
tipifarnib		chemical drug				0.0285	CDKN1A
bilobalide		chemical - endogenous non-mammalian				0.0285	BAX
MS645		chemical reagent				0.0285	CDK4
SMAD1/5/9		group				0.0285	CDKN1A
L-asparagine		chemical - endogenous mammalian				0.0285	CDKN1A
Collagen type VI		complex				0.0285	BAX
thymeleatoxin		chemical toxicant				0.0285	CDKN1A
histone deacetylase inhibitor		chemical drug				0.0292	BAX,CDKN1A
alvocidib		chemical drug				0.0292	CDKN1A,TXN
AG490		chemical - kinase inhibitor				0.0298	BAX,CDKN1A,JAK2
elaidic acid		chemical - endogenous mammalian				0.0298	EBP,PHGDH,YWHAH
FOLR1		transporter				0.0306	ABCE1,EPCAM,PFN1
rasagiline		chemical drug				0.0307	BAX,Marcks
NQO1		enzyme				0.0307	BAX,CDKN1A
APR-246		chemical drug				0.0307	BAX,PDS5A
DSCAM		other				0.0315	ATF5,CREB3,JAK2
IFNA2		cytokine		1.945	bias	0.0317	ATF5,BAX,CDKN1A,HLA-A,PPP1CA
methotrexate		chemical drug				0.0322	AGPAT3,CCNG1,CDKN1A,PPIA,TP53INP1
TNFSF13		cytokine				0.0322	BAX,CDK4
TFAP4		transcription regulator				0.0322	CDKN1A,CKS2
sorafenib		chemical drug				0.0322	ATF5,CDK4
discodermolide		chemical drug				0.0322	CCNB2,CDKN1A
bezafibrate		chemical drug				0.0323	ACSL5,CDK4,MGMT
BDNF		growth factor				0.0324	ALDH7A1,CCDC114,CDKN1A,LGALS1,SERPINH1,Tmsb4x (includes others)
PRKAG3		other				0.0324	ODC1,RPE,SLC25A36,WNT4
decitabine		chemical drug		1.812	bias	0.0326	ABCE1,BAX,CDKN1A,LGALS1,MGMT,MIB2,MKI67,PABPC1,RCC2,SERPINH1,TSC22D1
IFNG		cytokine		0.476	bias	0.0331	ALDH7A1,BAX,CDK4,CDKN1A,ELAVL1,GNA13,HLA-A,HSPG2,JAK2,KRT19,NUPR1,ODC1,PHGDH,PPIA,PSMB9,SERP1,SERPINH1
BMP6		growth factor				0.0332	CDKN1A,EPHX1,TXNRD1
PC-SPES		chemical drug				0.0332	CCNG1,CDKN1A,TXN
Ige		complex		1.633	bias	0.0336	CDKN1A,Crip2,GNA13,JAK2,Marcks,PFN1
miR-27a-3p (and other miRNAs w/seed UCACAGU)		mature microRNA				0.0337	BAX,ODC1
mitoxantrone		chemical drug				0.0337	BAX,CDKN1A
bee venom		chemical - endogenous non-mammalian				0.034	MKI67,NUPR1,TSC22D1
5-azacytidine		chemical drug		1.982	bias	0.0349	CANX,CDKN1A,HSP90B1,MGMT
RCE1	0.18	peptidase				0.0353	CRIP1,RCE1
RUVBL1		transcription regulator				0.0353	CCNT1,NUDCD2
eflornithine		chemical drug				0.0353	CDKN1A,ODC1
raloxifene		chemical drug		1		0.0355	ASCC3,CDKN1A,DYNLL1,MKI67
pioglitazone		chemical drug				0.0355	BAX,CDK4,CDKN1A,KRT19
L-aspartic acid		chemical - endogenous mammalian				0.0355	CDKN1A
teniposide		chemical drug				0.0355	CDKN1A
TPPP2		other				0.0355	CDKN1A
C9orf116		other				0.0355	CDKN1A
ATXN8OS		other				0.0355	JAK2
hesperidin		chemical drug				0.0355	BAX
Atg5		other				0.0355	BAX
acyline		biologic drug				0.0355	BAX
DESI2		enzyme				0.0355	CDKN1A
ETHE1		enzyme				0.0355	BAX
TRIM29		transcription regulator				0.0355	CDKN1A
BCAS2		other				0.0355	CDKN1A
PHLDA2		other				0.0355	MKI67
SNHG3		other				0.0355	CDK4
CDH16		enzyme				0.0355	CDK4
C1GALT1		enzyme				0.0355	BAX
WNT16		other				0.0355	CDKN1A
PU-H71		chemical drug				0.0355	JAK2
Cathepsin		group				0.0355	MKI67
TYMS		enzyme				0.0355	CDKN1A
RNF34		enzyme				0.0355	CDKN1A
EAF2		transcription regulator				0.0355	WNT4
miR-615-5p (and other miRNAs w/seed GGGGUCC)		mature microRNA				0.0355	KRT19
miR-873-5p (and other miRNAs w/seed CAGGAAC)		mature microRNA				0.0355	MKI67
KCND2		ion channel				0.0355	BAX
RHOH		enzyme				0.0355	CDKN1A
silmitasertib		chemical drug				0.0355	MGMT
FLOT1		other				0.0355	CDKN1A
ARG2		enzyme				0.0355	BAX
ALDH3A1		enzyme				0.0355	CDKN1A
CCG-1423		chemical reagent				0.0355	PFN1
BRF1		transcription regulator				0.0355	CDKN1A
GTF2H4		transcription regulator				0.0355	CDK4
CEL		enzyme				0.0355	BAX
TACC3		other				0.0355	CDKN1A
ECT2		other				0.0355	CDKN1A
BBC3		other				0.0355	STMN1
MYCL		transcription regulator				0.0355	CDK4
GNL2		enzyme				0.0355	CDKN1A
RSU1		other				0.0355	CDKN1A
CDH13		other				0.0355	CDKN1A
RFXANK		transcription regulator				0.0355	HLA-A
silicon phthalocyanine		chemical drug				0.0355	CDKN1A
benidipine		chemical drug				0.0355	CDKN1A
vinyl carbamate		chemical toxicant				0.0355	CDKN1A
plevitrexed		chemical drug				0.0355	CDKN1A
geraniol		chemical - endogenous non-mammalian				0.0355	CDKN1A
pergolide		chemical drug				0.0355	BAX
azelaic acid		chemical - endogenous mammalian				0.0355	BAX
acetyl-11-keto-beta-boswellic acid		chemical reagent				0.0355	MKI67
SREBF1		transcription regulator				0.0367	ACSL5,BAX,CDK4,CDKN1A,NUPR1
thioacetamide		chemical toxicant				0.0367	EPHX1,GPX2,LGALS1,ODC1,RBM3
RBL2		other				0.0367	CCNB2,CDKN1A,STMN1
NS-398		chemical reagent				0.0367	BAX,CDKN1A,PSMB9
CX3CR1		G-protein coupled receptor		-1	bias	0.0368	GAS8,LZTFL1,NICN1,RPGR
S100A4		other				0.0369	BAX,CDKN1A
everolimus		chemical drug				0.0369	CCNB2,CDKN1A
cinnamaldehyde		chemical toxicant				0.0369	MKI67,ODC1
cyclopamine		chemical reagent				0.0369	CDKN1A,MKI67
bisphenol A		chemical - endogenous mammalian				0.0375	BAX,CDK4,CDKN1A,HSP90B1
TNFSF10		cytokine				0.0376	BAX,HLA-A,SERPINH1
HNF4A		transcription regulator		0.731		0.038	ABCE1,CCNG1,CCNT1,CDKN1A,CKS2,CRIP1,DDOST,DUSP16,EBP,EPCAM,EPHX1,GPX2,HLA-A,HMGB2,HSP90B1,NUCB1,PPP1CA,RPL41,SRP19,TXN,TXNRD1,UFM1,WNT4
SELPLG		other				0.0385	CDKN1A,GNA13
IFNE		cytokine				0.0385	CDKN1A,HEXB
mir-30		microRNA				0.0385	BAX,CDKN1A
ouabain		chemical drug				0.0385	CDKN1A,YWHAH
F2R		G-protein coupled receptor				0.0386	GNA13,KRT19,MCAM
ATF3		transcription regulator				0.0395	CDK4,CDKN1A,KRT19
puromycin aminonucleoside		chemical reagent				0.0395	BAX,GPX2,RBM3
miR-200b-3p (and other miRNAs w/seed AAUACUG)		mature microRNA				0.0401	EPCAM,KCNK1
SKIL		transcription regulator				0.0401	CDKN1A,CKS2
CDK2		kinase				0.0401	CDK4,CDKN1A
TXN	0.914	enzyme				0.0401	CDKN1A,TXN
gefitinib		chemical drug				0.0402	HSP90B1,KRT19,MKI67,TP53INP1
mir-10		microRNA				0.0405	BAX,HTATIP2,PPP1CA
sodium bisulfide		chemical reagent				0.0418	BAX,TXNRD1
ZMPSTE24		peptidase				0.0418	CDKN1A,JAK2
TXNRD1	0.171	enzyme				0.0418	BAX,GPX2
APP		other		1.342	bias	0.042	BAX,CANX,CDK4,CLIC1,CYFIP1,HSPG2,PPIA,RBM3,RPGR,STMN1,TP53INP1,TXN
poly rI:rC-RNA		biologic drug		1.964	bias	0.0424	ABCE1,BAX,CDCA3,HLA-A,JAK2,KRT19,MKI67,PSMB9
5-N-ethylcarboxamido adenosine		chemical reagent				0.0424	DUSP16,EPCAM,ODC1
adenosine dialdehyde		chemical reagent				0.0425	TXNRD1
ganciclovir		chemical drug				0.0425	CDKN1A
pervanadate		chemical reagent				0.0425	PSMB9
Rp-8-pCPT-cGMPS-triethylamine		chemical reagent				0.0425	CDKN1A
2,5-bis(5-hydroxymethyl-2-thienyl)furan		chemical reagent				0.0425	CDKN1A
exisulind		chemical drug				0.0425	CDKN1A
etretinate		chemical drug				0.0425	ODC1
tacedinaline		chemical drug				0.0425	ADCY6
DBH-AS1		other				0.0425	CDKN1A
LRRC26		ion channel				0.0425	PRSS3
KLF17		transcription regulator				0.0425	CDKN1A
BPIFB1		other				0.0425	CDK4
ZNRF3		enzyme				0.0425	WNT4
SPTAN1		other				0.0425	CDKN1A
TFPI		other				0.0425	CDKN1A
PFDN5		transcription regulator				0.0425	BAX
MKI67	0.028	other				0.0425	CDKN1A
ERAP1		peptidase				0.0425	HLA-A
LINC01234		other				0.0425	NUPR1
RALB		enzyme				0.0425	CDKN1A
mir-637		microRNA				0.0425	NUPR1
DNMT3L		transcription regulator				0.0425	EPCAM
AMBN		growth factor				0.0425	CDKN1A
MOV10L1		enzyme				0.0425	CDKN1A
KAT7		enzyme				0.0425	CDKN1A
ATP2B2		transporter				0.0425	BAX
MSLN		other				0.0425	BAX
ERCC1		enzyme				0.0425	CDKN1A
MAGED1		transcription regulator				0.0425	CDKN1A
AATF		transcription regulator				0.0425	CDKN1A
PEBP4		other				0.0425	CDKN1A
FUT4		enzyme				0.0425	BAX
TADA3		transcription regulator				0.0425	CDKN1A
DYNLL1	0.648	other				0.0425	CDKN1A
FSTL3		other				0.0425	CDKN1A
ADCY5		enzyme				0.0425	ADCY6
PRKAR2A		kinase				0.0425	CDKN1A
CCL15		cytokine				0.0425	CREB3
RNF17		other				0.0425	ODC1
ABCB7		transporter				0.0425	TXN
RAP1A		enzyme				0.0425	CDKN1A
WRN		enzyme				0.0425	CDKN1A
HLA-B		transmembrane receptor				0.0425	ELAVL1
PAXIP1		other				0.0425	CDKN1A
CXXC4		other				0.0425	CDKN1A
MIA-459		chemical reagent				0.0425	BAX
MIA-313		chemical reagent				0.0425	BAX
XCT790		chemical reagent				0.0425	CDKN1A
chloramphenicol		chemical drug				0.0425	CDKN1A
chlorambucil		chemical drug				0.0425	BAX
dibenzoylmethane		chemical toxicant				0.0425	CDKN1A
PK11007		chemical reagent				0.0425	CDKN1A
malondialdehyde		chemical toxicant				0.0425	CDKN1A
ruboxistaurin		chemical drug				0.0425	Marcks
Z-IETD-FMK		chemical - protease inhibitor				0.0425	BAX
Z-VEID-FMK		chemical reagent				0.0425	CDK4
edelfosine		chemical drug				0.0425	BAX
UDP-D-glucose		chemical - endogenous mammalian				0.0425	HSP90B1
sparfosic acid		chemical drug				0.0425	CDKN1A
3',4',7-trihydroxyisoflavone		chemical - endogenous non-mammalian				0.0425	CDK4
EGF		growth factor		0.614	bias	0.0428	ARHGEF2,CDK4,CDKN1A,CKS2,EPCAM,KRT19,LSM1,ODC1
VIP		other				0.0434	BAX,LGALS1,TP53INP1
PRKAA		group				0.0435	BAX,CDKN1A
KLF1		transcription regulator				0.0435	CDKN1A,SERPINH1
GPX1		enzyme				0.0435	GPX2,TXN
N-acetylsphingosine		chemical reagent				0.0435	BAX,CDKN1A
acetaminophen		chemical drug				0.0445	CCNG1,CDKN1A,ODC1,TXN
SPI1		transcription regulator		-0.865	bias	0.0445	BAX,CCNB2,CDK4,CDKN1A,PSMB9
Hsp27		group				0.0452	BAX,CDKN1A
thyroid hormone		chemical - endogenous mammalian				0.0452	ACSL5,ADCY6,CDKN1A,Tmsb4x (includes others)
IRF4		transcription regulator				0.0467	CANX,JAK2,PTP4A2,YWHAH
TOB1		transcription regulator				0.047	CDKN1A,MKI67
MYBL2		transcription regulator				0.047	CCNB2,CENPE
HNRNPK		transcription regulator				0.047	CDKN1A,Tmsb4x (includes others)
JAK3		kinase				0.047	BAX,CDK4
n-3 fatty acids		chemical drug				0.047	BAX,GPX2
curcumin		chemical drug		-0.04	bias	0.0472	BAX,CDK4,CDKN1A,CLIC1,ELAVL1,HSP90B1
dexamethasone		chemical drug		0.964		0.0482	AGPAT3,ARHGEF2,BAX,CANX,CDK4,CDKN1A,CLIC1,CRIP1,DUSP16,ELAVL1,HLA-A,HSP90B1,JAK2,LGALS1,MGMT,ODC1,PABPC1,PPP1CA,RCC2,SNRNP70,TSC22D1,TXN,WNT4
black raspberry extract		chemical drug				0.0485	H2AZ1,PHGDH,YWHAH
TRIM24		transcription regulator				0.0485	JAK2,MGMT,PSMB9
ITGA5		transmembrane receptor				0.0487	CDK4,CDKN1A
IL24		cytokine				0.0487	BAX,HSP90B1
2-bromoethylamine		chemical reagent				0.0487	GPX2,RBM3
EHMT2		transcription regulator				0.0487	CDKN1A,VAPB
NOS2		enzyme		0.606		0.049	BAX,CDKN1A,HMGB2,SERPINH1
CG		complex		1.519	bias	0.0493	BAX,CDK4,CDKN1A,HLA-A,MCAM,WNT4
RNA polymerase II		complex				0.0494	CCNB2,CDKN1A,PSMB9,Tmsb4x (includes others),TXN
L-proline		chemical - endogenous mammalian				0.0494	CDKN1A
EIF2A		translation regulator				0.0494	ATF5
SLC5A8		transporter				0.0494	BAX
MED28		other				0.0494	CRIP1
ruxolitinib		chemical drug				0.0494	JAK2
valine		chemical - endogenous mammalian				0.0494	CDKN1A
HNRNPR		other				0.0494	CANX
SERPINC1		enzyme				0.0494	HSPG2
RAP1GAP		other				0.0494	CDK4
REV1		enzyme				0.0494	BAX
FGF13		growth factor				0.0494	CDKN1A
STIM2		transporter				0.0494	MKI67
CCNA2		other				0.0494	CDKN1A
miR-519a-3p (and other miRNAs w/seed AAGUGCA)		mature microRNA				0.0494	ELAVL1
mir-128		microRNA				0.0494	BAX
PDE3A		enzyme				0.0494	CDKN1A
DLC1		other				0.0494	CDK4
BANCR		other				0.0494	CDKN1A
FERMT1		other				0.0494	WNT4
PIK3C3		kinase				0.0494	HLA-A
IGFBP4		other				0.0494	MCAM
FKBP1A		enzyme				0.0494	CDKN1A
PPM1A		phosphatase				0.0494	CDKN1A
RAD9A		enzyme				0.0494	CDKN1A
DMTF1		transcription regulator				0.0494	CDKN1A
SUPT5H		transcription regulator				0.0494	CDKN1A
THOC1		transcription regulator				0.0494	BAX
ERBIN		other				0.0494	CDKN1A
PTGDS		enzyme				0.0494	BAX
ITGB1BP1		other				0.0494	CDKN1A
SLC6A2		transporter				0.0494	DYNLL1
MS4A1		other				0.0494	BAX
ITGB8		other				0.0494	CDKN1A
SNW1		transcription regulator				0.0494	CDKN1A
SLCO1B3		transporter				0.0494	CDKN1A
FUBP1		transcription regulator				0.0494	STMN1
glyceraldehyde-BSA		chemical reagent				0.0494	CDKN1A
methylglyoxal-BSA		chemical reagent				0.0494	CDKN1A
FOXN3		transcription regulator				0.0494	CFAP36
RHOC		enzyme				0.0494	CDKN1A
N-methyl mesoporphyrin IX		chemical reagent				0.0494	CDK4
[truncated: 16 more rows]
