# Supplementary material for: Single-cell transcriptome analysis defines heterogeneity of the murine pancreatic ductal tree
Source: eLife. 2021 May 19;10:e67776. doi: 10.7554/eLife.67776 (PMC8184217; doi:10.7554/eLife.67776)
Supplement: Figure 2—source data 4. [file elife-67776-fig2-data4.xlsx]

## Sheet: Sheet1
Cluster	# of cells	Transcripts	Genes
0	611	6846	2648
1	398	4400	1953
2	397	4256	1897
3	183	5343	2358
4	138	7569	2836
5	29	6741	2630
