# Supplementary material for: Single-cell transcriptome analysis defines heterogeneity of the murine pancreatic ductal tree
Source: eLife. 2021 May 19;10:e67776. doi: 10.7554/eLife.67776 (PMC8184217; doi:10.7554/eLife.67776)
Supplement: Figure 3—figure supplement 1—source data 1. [file elife-67776-fig3-figsupp1-data1.xlsx]

## Sheet: Merged BEC - DBA+ duct c3 and 4
Cluster	# of cells	Transcripts	Genes
0	1779	1890	1001
1	1585	2109	1049
2	975	1958	991
3	60	1775	950
4	50	3553	1382
