# Supplementary material for: Single-cell transcriptome analysis defines heterogeneity of the murine pancreatic ductal tree
Source: eLife. 2021 May 19;10:e67776. doi: 10.7554/eLife.67776 (PMC8184217; doi:10.7554/eLife.67776)
Supplement: Figure 3—figure supplement 1—source data 2. [file elife-67776-fig3-figsupp1-data2.xlsx]

## Sheet: Merged BEC - DBA+ duct 3 and 4
	avg_logFC	p_val_adj	cluster
Clu	0.875828	1.19e-126	0
Dbi	0.989666	1.56e-107	0
Ttr	1.51403	2.14e-102	0
Rnf113a1	0.996332	6.67e-102	0
Ambp	0.657366	2.52e-101	0
Cdc25b	0.979848	2.98e-91	0
Cdk1	0.537594	2.63e-90	0
Dus4l	0.643593	6.81e-89	0
Tstd1	0.702043	9.39e-84	0
Apoe	1.24712	1.66e-81	0
Mia	1.12914	4.27e-79	0
Cd9	0.818801	1.92e-78	0
Gstm1	1.01622	8.02e-70	0
Mmp7	0.514096	2.19e-67	0
Tpst1	0.462406	3.12e-65	0
Cp	0.763965	4.12e-65	0
Morn5	0.703	1.86e-59	0
Fam118a	0.967819	1.05e-58	0
Slc16a13	0.404023	1.06e-58	0
Nr0b2	0.855135	3.5e-56	0
Gpatch4	0.590968	7.12e-54	0
Dpp7	0.648012	7.8e-53	0
Jmjd4	0.739157	2.08e-52	0
Anxa5	0.542552	2.32e-52	0
Wfdc3	0.957208	1.61e-50	0
Rfxank	0.505131	3.43e-49	0
Tmem67	0.743178	3.93e-49	0
Zfp93	0.647992	5.5e-49	0
Prdx1	0.441411	1.04e-48	0
Slc35b4	0.726107	2.72e-48	0
Gm4285	0.862002	3.92e-48	0
Apoc1	1.10388	1.99e-47	0
2900076A07Rik	0.507102	9.52e-47	0
Zfp760	0.838731	1.89e-42	0
Zfp768	0.466509	1.08e-40	0
Abhd8	0.905249	2.66e-40	0
Lipt2	0.487325	2.73e-39	0
Alb	0.80637	5.29e-39	0
Cmah	0.472848	7.02e-39	0
Fabp5	0.461079	3.04e-38	0
Hrsp12	0.942518	3.88e-38	0
Sfxn4	0.654532	5.67e-37	0
Tmem107	0.661013	1.22e-36	0
Rbp1	0.666396	1.78e-36	0
D17H6S53E	0.977518	1.82e-36	0
Ecscr	0.918538	1.32e-35	0
Capg	0.513704	3.01e-35	0
Spon1	0.452544	5.78e-35	0
Coprs	0.607235	6.74e-34	0
Scp2	1.12847	7.24e-34	0
Chaf1b	0.48843	9.4e-33	0
Cth	0.565324	1.13e-32	0
3110079O15Rik	0.691321	1.28e-32	0
Flywch2	0.551127	2.01e-32	0
Tmem45a	1.01662	3.95e-32	0
Ndrg2	0.9246	4.8e-32	0
Emb	0.583351	1.86e-31	0
Proc	0.797608	1.96e-31	0
Dpm1	0.932044	5.32e-31	0
Cmss1	0.660771	6.48e-31	0
Ccdc166	0.527426	6.81e-31	0
Tmem176b	0.427645	2.33e-30	0
Trf	0.603585	8.27e-30	0
Noc4l	0.421741	1.14e-29	0
Stx2	0.763577	1.65e-28	0
Myl12b	0.583266	1.81e-28	0
Pik3cb	0.410275	2.18e-28	0
Bet1	0.824726	3.13e-28	0
Aldob	0.872487	5.78e-28	0
Dpy19l1	0.405686	2.56e-27	0
Bambi	0.616725	2.66e-27	0
Itsn2	0.417114	7.68e-27	0
Prkag2	0.484905	8.04e-27	0
AW112010	0.858134	1.37e-26	0
Mpdz	0.723135	1.86e-26	0
Zfp870	0.537937	1.95e-26	0
Cldn10	0.614664	2.97e-26	0
Rpgr	0.467717	3.17e-26	0
2610305D13Rik	0.472082	3.85e-26	0
Ctsh	0.539412	1.48e-25	0
Id2	0.562871	3.12e-25	0
Tfpi	0.912294	1.32e-24	0
Rora	0.591637	1.39e-24	0
Fut8	0.778072	1.9e-24	0
1700049E15Rik	0.451362	2.31e-24	0
Sh3bgrl3	0.621862	2.61e-24	0
Pah	0.503933	2.19e-23	0
Iqub	0.794291	2.65e-23	0
Wdr12	0.50969	4.69e-23	0
Copz2	0.614931	9.1e-23	0
Upb1	0.58937	1.7e-22	0
Pphln1	0.715433	1.92e-22	0
Timm8a1	0.817158	2.85e-22	0
Xylb	0.472754	2.99e-22	0
Gipc2	0.787484	8.42e-22	0
Anxa3	0.451234	9.96e-22	0
Ces1d	0.460553	1.18e-21	0
Ankrd49	0.543628	1.2e-21	0
Gsta3	0.788434	1.3e-21	0
Cib1	0.569557	5.83e-21	0
2020-03-08	0.413709	6.93e-21	0
Ndufs6	0.803959	1.07e-20	0
Tbc1d16	0.592695	1.3e-20	0
Msn	0.454445	3.25e-20	0
Ttc17	0.768881	4.85e-20	0
Vmac	1.17572	5.71e-20	0
Gnmt	0.811933	6.37e-20	0
Ints9	0.548625	9.39e-20	0
Bysl	0.657951	1.43e-19	0
Cox7a1	0.837701	2.18e-19	0
Fhad1	0.867107	5.53e-19	0
Psph	0.594727	6.09e-19	0
Zbtb8a	0.71162	2.21e-18	0
Ppp1r26	0.469902	7.73e-18	0
Ncbp2	0.796339	8.34e-18	0
Cdk8	0.522246	8.36e-18	0
Lactb	0.41572	8.69e-18	0
Ppp1r36	0.416204	9.49e-18	0
Pttg1	0.77525	3.56e-17	0
Lmf2	0.75928	7.2e-17	0
Orc2	0.410083	7.54e-17	0
Gspt1	0.885781	8.64e-17	0
Rbp4	1.01502	8.77e-17	0
Cetn4	0.400062	8.97e-17	0
Cox7b	0.435636	1.15e-16	0
Qdpr	0.629994	1.63e-16	0
Trim12c	0.529894	1.67e-16	0
Mboat7	0.572833	2.15e-16	0
Pole3	0.463698	2.6e-16	0
Wbscr22	0.803209	3.72e-16	0
Id1	0.692352	5.75e-16	0
Egfl7	0.834489	6.07e-16	0
Cfb	0.613613	7e-16	0
Mrrf	0.805766	7.29e-16	0
D230025D16Rik	0.490638	9e-16	0
Tyms	1.14326	1e-15	0
Golim4	0.568545	2.02e-15	0
Dcaf12l1	0.792399	2.14e-15	0
Tsacc	0.403339	2.6e-15	0
Tuba1a	0.749395	4.47e-15	0
Ankib1	0.449777	5.71e-15	0
Yipf1	0.831193	5.84e-15	0
Atg3	0.516133	7.09e-15	0
Trmt12	0.429539	9.24e-15	0
Nup98	0.563589	1.51e-14	0
Wfdc18	0.828888	1.53e-14	0
Smim5	0.419768	2.25e-14	0
Antxr2	0.472595	4.7e-14	0
Suv39h1	0.633122	5.42e-14	0
Adck3	0.556576	6.55e-14	0
Ctbs	0.507988	7.14e-14	0
S100a11	0.552874	7.55e-14	0
Ggct	0.648514	8.43e-14	0
Txn2	0.568457	8.85e-14	0
Ttc36	0.622292	1.03e-13	0
Gramd3	0.685241	1.24e-13	0
Car2	0.51352	1.46e-13	0
Swi5	0.467709	1.56e-13	0
Iqcg	1.09779	2.19e-13	0
Fancm	0.430298	2.28e-13	0
Nlrc5	0.413762	2.68e-13	0
Lgals1	0.648937	3.86e-13	0
Kbtbd4	0.430413	4.57e-13	0
Bcl2l2	0.674428	4.63e-13	0
Ddx18	0.537887	6.1e-13	0
Tesc	0.919385	6.49e-13	0
Cfi	0.745957	9.17e-13	0
Ttc12	0.684911	1.01e-12	0
Pmvk	0.483467	1.4e-12	0
Psd4	0.699003	1.41e-12	0
Agt	0.547998	1.71e-12	0
Phf6	0.490278	1.83e-12	0
Ahi1	0.897276	2.23e-12	0
Psmd14	0.620151	3.11e-12	0
Egln2	0.479536	6.09e-12	0
Rbl1	0.40986	7.2e-12	0
Ccdc167	0.443252	7.91e-12	0
Irak1bp1	0.814381	1.22e-11	0
Mdk	0.617394	2.33e-11	0
Fam188a	0.451427	4.28e-11	0
Fam213a	0.536152	4.68e-11	0
Ssbp1	0.827667	5.37e-11	0
Cyba	0.606622	1.14e-10	0
Nudt5	0.547029	3.81e-10	0
Hexa	0.533769	5.48e-10	0
Sergef	0.494967	7.5e-10	0
Serpinb9	0.470716	1.18e-09	0
Strn3	0.489758	1.21e-09	0
Hmga2	0.51985	1.29e-09	0
Dpp9	0.43952	1.38e-09	0
Fga	0.413593	1.81e-09	0
Mlf1	0.423924	1.96e-09	0
Rpp40	0.601608	3.12e-09	0
Hsd17b12	0.406939	5.36e-09	0
Dnali1	0.445332	5.7e-09	0
Tmem181a	0.951251	5.99e-09	0
Bpgm	0.529112	6.65e-09	0
Gskip	0.457187	7.94e-09	0
Elmo1	0.424507	7.95e-09	0
Mrpl14	0.669344	8.07e-09	0
Pih1d2	0.532335	1.1e-08	0
Slc16a2	0.436817	1.3e-08	0
Aadac	0.58767	1.33e-08	0
Got1	0.629631	2.74e-08	0
Slc15a2	0.536587	2.88e-08	0
Cep44	0.718368	3.49e-08	0
Mtmr9	0.555697	3.7e-08	0
Acad11	0.474289	1e-07	0
G6pc3	0.537351	1.19e-07	0
C1qtnf4	0.740102	1.23e-07	0
Psmb8	0.714002	2.32e-07	0
Scd2	0.613213	3.21e-07	0
C1d	0.779133	4.65e-07	0
Commd5	0.481797	6.33e-07	0
Iyd	0.47377	6.55e-07	0
Lig4	0.40089	7.65e-07	0
Maf	0.9722	8.47e-07	0
2810001G20Rik	0.912657	1.06e-06	0
BC016579	0.519268	1.11e-06	0
Fn1	0.623676	1.22e-06	0
Pon3	0.482808	1.43e-06	0
Nme1	0.590249	1.44e-06	0
Pip4k2a	0.539168	1.44e-06	0
Eif4ebp1	0.590847	1.63e-06	0
l7Rn6	0.784024	2.87e-06	0
Sord	1.04235	2.93e-06	0
D6Wsu163e	0.525479	3.02e-06	0
Sms	0.504031	3.27e-06	0
Zmym2	0.576901	6.07e-06	0
Med7	0.513335	6.78e-06	0
Surf6	0.502384	6.83e-06	0
Msl3	0.459695	9.92e-06	0
Zfp367	0.400221	1.08e-05	0
Sparc	0.532897	1.17e-05	0
Fnbp1l	0.503609	1.7e-05	0
Dynlrb1	0.447841	1.97e-05	0
Enkur	0.4042	2.22e-05	0
Cyp4v3	1.02738	2.34e-05	0
Zfp944	0.760689	2.72e-05	0
Cdo1	0.562851	3.98e-05	0
Fam117b	0.479491	4.57e-05	0
Eif4h	0.518766	8.27e-05	0
Cox10	0.485934	0.000108025	0
Mad2l1	0.686825	0.00011266	0
Golgb1	0.546685	0.00011701	0
Pf4	0.711941	0.000129826	0
Usp30	0.400599	0.000136134	0
Ctnnd2	0.562837	0.000154848	0
P4htm	0.494233	0.000155112	0
Fam210b	0.495921	0.000159027	0
Exosc10	0.560664	0.000162625	0
Etv1	0.657832	0.000211692	0
Isoc1	0.615349	0.000214372	0
Isg20l2	0.43852	0.000239579	0
Lpl	0.536057	0.000240252	0
Gng11	0.478105	0.000265103	0
Tsn	0.486685	0.000272037	0
Amigo1	0.495391	0.00036349	0
Fbxl8	0.634586	0.00042119	0
Traf3ip2	0.560505	0.000446148	0
Arl6ip4	0.601123	0.000583337	0
Dnajc12	0.819682	0.000597103	0
Phf10	0.51917	0.000762514	0
1700008J07Rik	0.613957	0.00078812	0
Myof	0.613309	0.00102512	0
Cadm1	0.455326	0.00122163	0
Mmaa	0.654949	0.0014866	0
Slc22a15	0.475518	0.00177242	0
Reep3	0.458018	0.00223168	0
Foxj1	0.800361	0.00313452	0
Coq3	0.554725	0.0032295	0
Zfp667	0.552264	0.00330229	0
Gtf3c6	0.527406	0.00335089	0
Sftpd	0.476464	0.00340744	0
Pigr	0.412593	0.00445562	0
Rabl2	0.484112	0.00535188	0
Spns2	0.513306	0.00762688	0
Ephx2	0.588788	0.00914775	0
Rnase4	0.443188	0.0102537	0
Mmab	0.598287	0.0119377	0
Slirp	0.523685	0.0126537	0
Kifap3	0.471759	0.0143599	0
Nsun4	0.458302	0.0156818	0
Fgd2	0.406568	0.0160117	0
Mocs3	0.544945	0.0165467	0
Pim2	0.404321	0.0224181	0
Bcap29	0.538424	0.0246316	0
Rnf115	0.4884	0.0275689	0
Slc4a4	0.647051	0.031746	0
Fam47e	0.597791	0.0358154	0
Nxpe3	0.485936	0.038314	0
Cmtm8	0.541939	0.0415195	0
Phyh	0.511311	0.0418314	0
Yipf6	0.607064	0.0433864	0
Rnf181	0.497864	0.0438397	0
Hspa1a	2.76777	0	1
Hspa1b	2.37842	0	1
Hspb1	2.51002	5.24e-285	1
Hspa8	2.35551	9.77e-255	1
Hsp90aa1	2.10146	7.88e-193	1
Dnajb1	2.21895	4.09e-167	1
Hspe1	2.11153	1.08e-139	1
Fos	0.437217	1.41e-89	1
Jun	0.669989	1.32e-79	1
C2cd4b	1.53956	3.26e-69	1
Dnaja1	1.66733	9.32e-57	1
Hsp90ab1	1.25011	1.76e-52	1
Hspd1	1.52581	7.06e-49	1
Mblac1	0.529442	3.43e-48	1
Gdf15	0.685755	4.86e-45	1
Adrb2	0.908321	8.36e-45	1
Bag3	1.38067	4.86e-42	1
Bdnf	0.593435	6.69e-42	1
Ubc	0.661657	5.3e-41	1
Map3k8	0.573941	5.71e-39	1
Dnajb4	1.0082	1.07e-38	1
Hsph1	0.999015	7.15e-35	1
Zfp280b	0.891377	3.07e-34	1
Gemin6	0.57179	3.86e-34	1
Fign	0.541103	1.16e-33	1
Zc3h10	0.422162	1.79e-32	1
Dnajb14	0.702528	7.66e-32	1
Ier2	0.512392	3.78e-31	1
Lpin3	0.527107	4.19e-30	1
Usp34	0.790291	3.38e-29	1
9130023H24Rik	0.561916	7.68e-29	1
Alkbh1	0.47041	6.29e-28	1
Vim	0.438152	1.53e-26	1
Spock3	0.476305	2.9e-26	1
Dusp1	0.515813	1.23e-25	1
Brca2	0.444504	1.3e-24	1
Zc3h12c	0.591207	1.66e-24	1
Gnb1l	0.570853	1.9e-24	1
Zfp712	0.533986	3.31e-23	1
Dnaja4	0.94148	1.19e-22	1
Serpinh1	1.24158	4.7e-22	1
Fam131a	0.60858	4.81e-22	1
Rgs2	0.950215	1.89e-21	1
Inpp5e	0.446705	3.37e-21	1
Dalrd3	0.444817	1.28e-19	1
Stk10	0.410635	2.57e-19	1
Arl4a	0.65595	1.34e-17	1
Tbc1d13	0.490556	1.87e-17	1
Sox4	0.50694	3e-17	1
Cenpk	0.46864	2.47e-16	1
Flrt3	0.530641	6.66e-16	1
Hmox1	0.473225	1.33e-15	1
Slc22a4	0.853909	2.38e-15	1
Shisa4	0.648151	1.01e-14	1
Fam181b	0.773848	1.77e-14	1
Brat1	0.782763	2.69e-14	1
Gab2	0.679408	6.94e-14	1
Rhob	0.557555	1.26e-13	1
Aggf1	0.848767	3.72e-13	1
Cryab	1.24716	1.06e-12	1
Cacybp	0.700547	1.99e-12	1
1810011O10Rik	0.597305	7.17e-12	1
Ncs1	0.644946	1.26e-11	1
Car13	0.538727	4.04e-11	1
Chchd5	0.562598	8.78e-11	1
Donson	0.752956	2.07e-10	1
Id3	0.551344	3.86e-10	1
Phlda1	0.895532	4.77e-10	1
Lce6a	0.733109	7.59e-10	1
Kifc2	1.03153	1.31e-09	1
Adam33	0.44935	1.58e-09	1
Dusp8	0.630318	8.59e-09	1
Kremen1	0.453622	1.16e-08	1
Bcat2	0.601275	2.06e-08	1
Hus1	0.981305	2.27e-08	1
Ttc9	0.461942	2.37e-08	1
Rusc2	0.582231	5.36e-08	1
Gla	0.505998	5.78e-08	1
Txnip	0.463352	5.89e-08	1
Ttc37	0.772473	8.21e-08	1
Rab39b	0.529173	1.07e-07	1
A230046K03Rik	0.621269	1.35e-07	1
Hnf1a	0.775608	3.42e-07	1
Sdad1	0.495018	3.86e-07	1
Taf7	0.406817	4.26e-07	1
Eif2ak4	0.412548	5.65e-07	1
Rnd3	0.516086	6.01e-07	1
Mphosph8	0.529498	6.54e-07	1
Slc12a4	0.433344	6.9e-07	1
Ryk	0.605715	1.62e-06	1
Rbm19	0.814985	3.28e-06	1
Pou6f1	0.623679	5.37e-06	1
Tshz1	0.422603	7.38e-06	1
Amotl2	0.401621	8.49e-06	1
Sft2d3	0.561192	1.1e-05	1
Prr5	0.561474	1.26e-05	1
Smad6	0.498602	1.55e-05	1
Ctgf	0.454676	2.1e-05	1
Ocel1	0.432553	4.9e-05	1
Itpr1	0.45318	5.03e-05	1
Mycbpap	0.479976	5.91e-05	1
Zfp563	0.599552	8.46e-05	1
Lyar	0.699028	0.000270886	1
Cep192	0.64374	0.000394595	1
Mllt1	0.592803	0.000411237	1
Cd36	0.69607	0.000607875	1
Sppl3	0.465374	0.000656379	1
Wdr44	0.46461	0.000797903	1
Mat2a	0.618964	0.000804225	1
Ophn1	0.64218	0.000840718	1
Nfatc2	0.525224	0.00125686	1
0610009L18Rik	0.443079	0.001354	1
Angptl1	0.514867	0.00272688	1
E130308A19Rik	0.410626	0.00331412	1
Grk6	0.635748	0.00361872	1
Btbd10	0.445728	0.00447507	1
Pms1	0.564499	0.0051599	1
Slc30a6	0.442218	0.00559169	1
Mcts2	0.726032	0.00708289	1
Dll1	0.582696	0.00988573	1
Ccdc82	0.508438	0.0119462	1
Pura	0.503551	0.0145672	1
Ap1g2	0.76902	0.0159664	1
Zc3h8	0.407382	0.0162875	1
Aebp1	0.44854	0.0227346	1
Spry1	0.565384	0.0403227	1
Edn1	0.630217	0.0433762	1
Zfp36	2.54841	0	2
Junb	2.36371	0	2
Nfkbia	2.56323	0	2
Ifrd1	2.38629	5.19e-288	2
Bhlhe40	2.74919	1.39e-287	2
Nfkbiz	1.94603	6.67e-285	2
Atf3	1.85259	4.28e-278	2
Actg1	1.83439	2.31e-276	2
Fosb	2.27156	3.56e-261	2
Ier3	2.69386	1.24e-243	2
Csrnp1	2.04613	5.91e-232	2
Gadd45b	2.29049	9.92e-227	2
Cxcl1	2.46275	9.38e-209	2
Atf4	1.94129	3.09e-202	2
Krt8	2.36196	2.75e-199	2
Maff	1.8759	3.2e-199	2
Klf6	1.45863	2.18e-195	2
Hes1	2.43545	2.77e-193	2
Egr1	1.72778	2.3e-192	2
Ccnl1	1.66741	5.31e-182	2
Btg2	1.4642	3.38e-170	2
Irf1	1.62811	9.73e-170	2
Hbegf	1.98112	5.97e-169	2
Zfp36l1	1.69474	2.61e-162	2
Ubc1	0.973007	3.89e-161	2
Arid5a	1.9561	6.93e-154	2
Icam1	2.24364	4.05e-142	2
Cldn4	1.97696	1.03e-140	2
Krt18	1.99939	8.01e-137	2
Nr1d1	1.6386	2.83e-135	2
Socs3	1.7244	9.92e-135	2
Pnrc1	1.49527	2.1e-134	2
Mafk	1.78499	1.81e-131	2
Tuba1c	1.05821	5.23e-123	2
Pprc1	0.810297	2.47e-120	2
Dusp81	0.842293	4.18e-114	2
Wdr92	1.94454	3.29e-113	2
Stx11	1.67909	8.24e-113	2
Itpkc	1.96093	1.13e-110	2
Elf3	1.58143	1.07e-108	2
Tgif1	1.7405	4.56e-107	2
Ppp1r15a	1.41985	4.31e-106	2
Cdkn1a	1.74106	9.03e-105	2
Tnfaip3	1.74074	4.47e-104	2
Vcam1	1.44652	1.7e-102	2
Tsc22d2	1.44194	2.37e-101	2
Lif	1.7621	3.16e-100	2
Fos1	1.24659	1.87e-98	2
Krt17	1.07386	8.54e-96	2
Slc7a1	1.32243	9.74e-96	2
Sqstm1	1.06007	7.21e-94	2
Hspa5	1.712	1.27e-93	2
Rap2b	1.06343	1.69e-93	2
Ankrd1	1.81138	1.72e-93	2
Coq10b	1.42674	3.57e-93	2
Ets2	1.72313	1.18e-90	2
Klf10	1.75364	3.95e-88	2
Epha2	2.73415	4.37e-88	2
Vmp1	1.71675	5.67e-87	2
Neurl3	0.928135	4.06e-86	2
Errfi1	1.4234	1.14e-85	2
Ier5	1.47311	1.24e-85	2
Klf11	1.28413	4.12e-85	2
Tnfrsf12a	1.37023	7.48e-85	2
Cercam	0.928559	9.81e-85	2
Mcl1	0.979452	2.23e-84	2
Cyr61	1.32812	1.03e-83	2
Ier21	1.0093	7.73e-83	2
Tubb6	1.43579	7.77e-83	2
Zbtb10	1.16657	5.36e-81	2
Myc	1.60411	7.99e-81	2
Adamts1	1.34533	8.83e-80	2
Ccdc66	0.426403	3.5e-78	2
Ddx5	0.975208	4.52e-78	2
Pvr	1.72277	1.88e-77	2
H3f3b	1.49195	6.92e-76	2
Pim3	1.45633	9.65e-75	2
Pim1	1.7062	5.01e-74	2
Grasp	1.38474	9.29e-74	2
Sfn	0.612924	4.49e-73	2
Skil	1.41761	3.36e-72	2
Spty2d1	1.02236	4.42e-71	2
Msln	1.44751	2.74e-69	2
Jund	1.17042	1.64e-68	2
Abhd3	0.530349	2.37e-68	2
Insig1	1.61227	3.18e-67	2
Plaur	1.9269	3.19e-67	2
Dusp11	1.1494	1.7e-65	2
2020-06-01	0.909287	2.18e-65	2
Cep135	0.778512	2.75e-65	2
Btg1	0.792792	2.85e-64	2
Fam220a	0.586179	7.58e-64	2
Alg13	0.784173	2.96e-63	2
Cxcl2	1.95608	5.62e-62	2
Klf9	1.18252	6.03e-62	2
Tmtc2	0.538459	6.76e-61	2
Per1	1.15537	2.5e-60	2
Rela	1.40589	3.93e-60	2
Tgif2	1.09159	3.42e-59	2
Prr7	1.41162	4.26e-59	2
Trib1	1.10052	4.46e-59	2
Stx12	0.914534	5.6e-59	2
Ldlr	0.86385	9.31e-59	2
Birc3	1.35006	3.2e-58	2
Tmem120a	0.544942	3.33e-58	2
Stk40	1.51333	4.33e-58	2
Ago2	1.15216	4.51e-58	2
Tex30	0.560033	4.84e-58	2
Cish	1.23995	5.77e-58	2
Mcf2l	0.403125	1.68e-56	2
Klf4	1.15286	4.55e-56	2
Klf2	1.21406	6.44e-56	2
Ankrd28	0.502719	1.23e-55	2
Clic4	1.65726	6.1e-55	2
S100b	0.676397	8.33e-55	2
Rhov	1.1978	1.02e-54	2
Spsb1	0.750508	1.93e-54	2
Zfp217	0.759381	3.51e-54	2
Slc38a2	1.25204	4.26e-54	2
Srf	0.992083	8.9e-54	2
Rnd1	1.64098	1.27e-52	2
Ddit4	0.87596	1.96e-52	2
Cebpb	1.12748	3.02e-52	2
Wsb1	0.837283	2.62e-51	2
Cxcl16	1.03087	1.91e-50	2
Rhob1	0.733951	2.3e-50	2
Fam134b	1.41398	3.07e-50	2
Mxd1	0.749511	1.3e-48	2
Hic2	0.647322	1.33e-48	2
Kpna2	0.850636	1.9e-48	2
Casz1	0.976125	2.81e-48	2
Tapbpl	0.896735	1.92e-47	2
1810011O10Rik1	0.594129	2.15e-47	2
Gprc5a	0.708344	3.12e-47	2
Herpud1	0.837013	7.13e-47	2
Relb	0.868553	2.16e-46	2
Basp1	0.754054	6.9e-46	2
Efhd2	1.14786	3.24e-45	2
Zufsp	0.517097	4.14e-45	2
Wee1	0.685961	4.59e-45	2
Gadd45a	1.39723	7.17e-45	2
Fosl2	1.25198	1.41e-44	2
Ttll7	0.573861	5.66e-44	2
Sgms2	1.66702	1.66e-43	2
Ptp4a1	1.26096	1.75e-43	2
Ddit3	1.28054	3.48e-43	2
Rhou	1.02694	5.73e-43	2
Cnn2	0.837988	6.46e-42	2
Phf13	0.781449	9.14e-41	2
Timp3	1.21262	1.96e-40	2
Tmem51	0.661275	7.46e-40	2
Tab3	0.575221	2.71e-39	2
Slc10a2	0.626744	4.25e-39	2
Srek1	0.419868	8.65e-39	2
Nt5dc3	1.17865	1.16e-38	2
Azin1	0.898506	3.89e-38	2
Filip1l	0.591227	8.73e-38	2
Ppm1d	0.447372	1.17e-37	2
Hmgcr	0.539909	1.41e-37	2
Agl	0.648107	3.25e-37	2
Pde12	1.02897	3.06e-36	2
B4galt1	0.459553	7.48e-36	2
Rabgef1	0.531922	1.71e-35	2
Hmgcs1	0.611386	5.44e-35	2
Tmed5	0.500113	6.14e-35	2
Trp53inp1	0.968083	6.55e-35	2
Zbtb21	1.16689	2.18e-34	2
B3gnt2	0.89795	2.73e-34	2
Igfbp5	1.11624	7.75e-34	2
Cyp51	1.03141	1.51e-33	2
Hdac4	0.762229	2.83e-33	2
Ddx3x	1.17777	5.73e-33	2
Gse1	0.550168	6.39e-33	2
Mboat2	0.83191	2.02e-32	2
Plcb1	0.68695	3.84e-32	2
Pdgfa	1.01052	9.9e-32	2
Chka	1.71538	1.18e-31	2
Pag1	0.660507	1.35e-30	2
Ffar4	0.793377	1.37e-30	2
Fbln2	0.611805	2.01e-30	2
Zswim4	1.08388	3.34e-30	2
Rsad2	1.3661	5.45e-30	2
Mfsd4	0.450311	7.15e-30	2
Ing5	0.583463	7.33e-30	2
Frmd4b	1.00213	7.97e-30	2
Pdgfb	0.879004	8.28e-30	2
Uck2	0.598763	1.48e-29	2
Cd14	1.29381	2.63e-29	2
Rrad	1.05189	2.97e-29	2
Entpd6	0.557748	4.23e-29	2
Arl5b	0.994095	1.41e-28	2
Prickle1	1.00474	2.21e-28	2
Akap13	0.520133	3.15e-28	2
Setdb1	0.525881	5.48e-28	2
Grpel2	0.602989	1.02e-27	2
Birc6	0.50964	1.3e-27	2
Lnx1	0.946572	1.45e-27	2
Nop58	0.681129	4.37e-27	2
Zfand5	1.05534	4.67e-27	2
Zfp948	0.520238	5.6e-27	2
Cflar	0.612001	8.44e-27	2
Pwwp2a	0.739697	1.03e-26	2
Zc3h81	0.40239	2.23e-26	2
Nvl	0.556328	3.3e-26	2
8430408G22Rik	1.097	3.36e-26	2
Khnyn	0.728819	4.39e-26	2
Pde4b	1.14985	4.47e-26	2
Rnd31	0.778793	7.81e-26	2
Ndrg1	0.834608	9.7e-26	2
Tmcc3	0.826312	1.13e-25	2
Nedd9	0.786037	2.14e-25	2
Parm1	0.559297	3.11e-25	2
Dnajb91	0.648413	4.68e-25	2
Ehf	1.04509	1.63e-24	2
Prr14l	0.538915	3.97e-24	2
Arhgap23	0.729684	4.71e-24	2
Dock6	0.654895	6.14e-24	2
Lonrf1	1.06023	1.48e-23	2
Gxylt1	0.457047	4.26e-23	2
Cul9	1.05974	4.61e-23	2
Chuk	0.424445	5.25e-23	2
Homer1	0.789319	7.37e-23	2
Gcc1	0.407597	1.02e-22	2
Zfhx3	0.510176	1.08e-22	2
Pfkfb3	0.537288	1.17e-22	2
Cnnm4	1.04467	1.38e-22	2
Pde3b	1.00688	1.89e-22	2
Desi2	0.628892	2.94e-22	2
Tmem125	0.461802	3.07e-22	2
Fam46a	0.479437	4.4e-22	2
Ctdp1	0.997884	4.66e-22	2
Klhl15	0.592235	4.79e-22	2
Gla1	0.546928	6.35e-22	2
Tob1	0.832109	6.35e-22	2
Cul1	0.597537	6.65e-22	2
Socs2	0.726417	6.82e-22	2
Hspb8	0.73205	1.36e-21	2
Stard13	0.924486	1.42e-21	2
F3	1.15154	2.99e-21	2
Fam107b	1.32962	3.47e-21	2
Cxcl10	1.00942	3.69e-21	2
Spg11	0.684844	4.62e-21	2
Klf5	0.683037	5.94e-21	2
Oaf	0.816532	5.95e-21	2
Cry2	0.408226	6.08e-21	2
Krt19	0.910611	9.71e-21	2
Lrsam1	0.516376	1.38e-20	2
Suco	0.48456	1.41e-20	2
Tsc22d1	0.592074	4.61e-20	2
Cse1l	0.726427	4.75e-20	2
Sema6a	0.588695	5.93e-20	2
Cenpq	0.472701	8.15e-20	2
Rassf1	0.859337	9.2e-20	2
Pdpk1	0.427615	1e-19	2
Lama3	0.663884	1.19e-19	2
Pou3f1	0.87471	1.5e-19	2
Sp2	0.741064	2.79e-19	2
Sh3bp2	0.715707	3.54e-19	2
Eif2ak3	0.775975	3.76e-19	2
Brca21	0.475957	3.9e-19	2
Hivep1	0.728183	4.14e-19	2
Nphp3	0.446862	4.91e-19	2
Thbs1	0.965554	6.87e-19	2
Bace2	0.482947	1.21e-18	2
Creb5	0.721281	1.61e-18	2
Msl1	0.426407	2.13e-18	2
AI429214	0.445644	2.57e-18	2
Macc1	0.75409	4.62e-18	2
Foxo1	0.413462	1.31e-17	2
Zswim6	0.912217	1.39e-17	2
Fmn1	0.681202	3.26e-17	2
Sass6	0.418116	3.47e-17	2
Tnfaip2	0.438804	7.77e-17	2
Map3k81	0.687536	9.19e-17	2
Wasf2	0.666919	9.88e-17	2
Ckmt1	0.496662	1.03e-16	2
Dstn	0.925834	1.19e-16	2
Pex10	0.655952	1.39e-16	2
Traf3ip1	0.622981	1.4e-16	2
Brwd3	0.620765	1.48e-16	2
Armc9	0.693694	1.96e-16	2
Rmdn2	0.466493	4.03e-16	2
Klf7	0.465506	5.84e-16	2
Eif5a2	0.536019	6.57e-16	2
BC005537	0.609081	7e-16	2
Gcnt2	0.553232	7.28e-16	2
Scai	0.809724	7.32e-16	2
Zfp869	0.407395	1.42e-15	2
Sgk1	0.475065	1.88e-15	2
Med13l	0.497355	2.34e-15	2
Nupr1	1.06741	3.18e-15	2
Myl12a	0.688394	3.44e-15	2
Serpinb6b	0.806713	7.69e-15	2
Cnot6	0.558794	7.94e-15	2
Abcb8	0.646305	8.57e-15	2
Ttll1	0.462709	1.9e-14	2
Zfp407	0.868713	2.04e-14	2
Pde4d	0.780742	4.38e-14	2
Helb	0.631904	7.1e-14	2
Gabrp	0.702135	1.14e-13	2
Gramd4	0.894037	1.23e-13	2
Myo19	0.534262	1.52e-13	2
Trp53bp2	0.815874	2.16e-13	2
Cyp4b1	0.417031	3.28e-13	2
Sp1	0.456254	3.81e-13	2
Traf4	0.411524	5.71e-13	2
Sox9	0.62813	1.42e-12	2
Plscr1	0.828306	2.04e-12	2
Mex3d	0.546297	2.23e-12	2
Gpbp1	0.48205	3.67e-12	2
Pard6b	0.682344	5.51e-12	2
Mtmr4	0.58564	6.95e-12	2
Lcn2	0.768966	7.21e-12	2
Fbxl19	0.562102	9.28e-12	2
Osgin2	0.78521	9.81e-12	2
Crebzf	0.676482	1.37e-11	2
Scaper	0.60747	1.4e-11	2
Trim16	0.708925	2.39e-11	2
Stx16	0.454633	3.47e-11	2
Mettl17	0.48239	3.89e-11	2
Idi1	1.11641	5.97e-11	2
Etf1	0.742601	7.1e-11	2
Perp	0.627945	7.73e-11	2
Piga	0.968219	1.3e-10	2
Stbd11	0.499355	1.46e-10	2
Atr	0.559857	1.72e-10	2
Ticam1	0.543022	1.79e-10	2
Ypel5	0.422764	3.01e-10	2
Ccdc141	0.423082	3.21e-10	2
Cebpg	0.885834	3.34e-10	2
Ttc14	0.566394	3.54e-10	2
Rbm33	0.607289	3.77e-10	2
Hipk3	0.510603	4.53e-10	2
Idh3a	0.440646	5.1e-10	2
Taf71	0.501299	5.71e-10	2
Efna1	0.498525	6.27e-10	2
Armcx3	0.710748	6.36e-10	2
Fbxo33	0.520955	6.57e-10	2
Lpar2	1.23478	6.95e-10	2
Dennd5b	0.41525	7.2e-10	2
Lsm12	0.448829	1.07e-09	2
Phip	0.47464	1.11e-09	2
Nrg1	0.449779	2.03e-09	2
Zbtb2	1.0112	3.26e-09	2
Nhlrc2	0.435258	3.41e-09	2
Myadm	0.533803	3.73e-09	2
Casc3	0.48707	3.76e-09	2
Il16	1.20292	4.1e-09	2
Terf1	0.545609	8.57e-09	2
Fcho1	0.463472	8.65e-09	2
Tbc1d9	0.500066	1.04e-08	2
Lmbr1	0.51668	1.15e-08	2
Rnf103	0.599318	1.17e-08	2
Ppp1r37	0.729716	1.2e-08	2
Zfp318	0.594636	1.49e-08	2
Fbxw11	0.478145	2.02e-08	2
Mical2	0.551133	2.04e-08	2
Csrp1	0.815956	3.85e-08	2
Tgfa	0.500212	4.32e-08	2
Glul	0.686449	5.1e-08	2
Sash1	0.663391	5.44e-08	2
Ttll5	0.469347	5.64e-08	2
Hsph11	0.540441	5.85e-08	2
Tjp1	0.635747	6.05e-08	2
Osgin1	0.676801	6.59e-08	2
Plk2	0.533198	6.74e-08	2
Zfp597	0.570536	6.85e-08	2
Ptdss2	0.457938	7.48e-08	2
Sbds	0.720409	7.8e-08	2
Lats2	0.934248	1.44e-07	2
Traf6	0.592251	1.89e-07	2
Rtn4rl1	0.644024	2.24e-07	2
Ahnak	0.47935	2.56e-07	2
Gdf151	0.475314	2.95e-07	2
Rnf138	0.554226	3.96e-07	2
Ezr	0.502459	5.74e-07	2
Cytip	0.480514	1.07e-06	2
Ubxn7	0.470065	1.69e-06	2
Taf15	0.838444	2.25e-06	2
Pqlc1	0.706038	2.38e-06	2
Flrt2	0.782989	2.77e-06	2
Csf1	0.941702	3.92e-06	2
2900026A02Rik	0.533659	4.04e-06	2
Lpl1	0.428817	7.98e-06	2
Hipk2	0.624783	8.26e-06	2
Bcl6	0.57392	1.22e-05	2
Lbh	0.600219	1.4e-05	2
Fdft1	0.518767	2.87e-05	2
Dab2	0.737089	3.57e-05	2
F11r	0.547615	3.62e-05	2
Sowahc	0.578874	5.58e-05	2
Pacsin3	0.402496	6.02e-05	2
Sfr1	0.869264	9.19e-05	2
Il33	0.40285	9.82e-05	2
Fam43a	0.464011	9.94e-05	2
Txnip1	0.654279	0.000130624	2
Dot1l	0.524708	0.000209185	2
Ric8b	0.902149	0.00025164	2
BC005561	0.48282	0.000373731	2
Irf9	0.777227	0.000445023	2
Nemf	0.450075	0.000524638	2
Helz2	0.596662	0.000537084	2
Herc1	0.593968	0.000644674	2
Dmwd	0.547153	0.000953243	2
Nras	0.602643	0.00103416	2
Sec14l1	0.514011	0.00120597	2
Tm4sf1	0.98135	0.00153749	2
Ung	0.465822	0.00161771	2
Dmxl1	0.563017	0.00186638	2
Apobec1	0.964222	0.00193127	2
Nt5c2	0.418762	0.00196877	2
Pfkp	0.449111	0.00236497	2
Nfkbie	0.964407	0.00295958	2
Garnl3	0.463363	0.00397803	2
Tspyl2	0.66774	0.00437068	2
Mtf2	0.468897	0.0046156	2
Gpr160	0.479972	0.00535837	2
Tctn3	0.491192	0.00535985	2
Noxo1	0.406349	0.00557644	2
Ddx21	0.692	0.00599228	2
Ptger4	0.837084	0.00750002	2
Clock	0.5045	0.0082299	2
Glb1l2	0.559482	0.00861802	2
Ets1	0.595272	0.0107898	2
Fzd5	0.57683	0.0110136	2
Fcgbp	0.43079	0.0129645	2
Lpin1	0.591675	0.0237267	2
Ap4e1	0.572917	0.0256577	2
Lin52	0.44607	0.0259801	2
Casp8ap2	0.482473	0.0266632	2
Lyrm1	0.426293	0.0270873	2
Nfib	0.528069	0.0395107	2
Iigp1	4.11954	1.44e-101	3
Igtp	3.71073	1.29e-70	3
Ifi47	3.5782	1.63e-59	3
Stat1	3.46069	1.37e-44	3
Gbp3	2.97762	3.68e-31	3
Gbp7	3.0633	2.32e-30	3
Irgm2	3.12325	5.94e-29	3
Gbp2	2.6809	3.29e-26	3
H2-Eb1	3.5684	6.62e-26	3
Tap1	2.42075	8.64e-26	3
B2m	2.74267	6.84e-24	3
H2-Ab1	2.96258	1.33e-22	3
Gbp4	2.71521	6.97e-20	3
Slc2a8	1.55496	2.28e-19	3
Zbp1	2.07969	1.46e-18	3
Lipo1	2.04222	3.04e-18	3
Irgm1	2.53452	3.52e-18	3
Ifit3	1.86089	3.57e-18	3
Ly6a	2.7825	1.51e-17	3
Ncs11	1.60941	4.31e-17	3
Rtp4	1.10059	1.12e-16	3
Parp9	2.69286	2.94e-16	3
Isg15	1.69607	2.23e-15	3
H2-Aa	2.83627	6.57e-15	3
Zfp942	1.38642	1.03e-14	3
Cxcl21	1.0551	1.97e-14	3
Zkscan6	1.26076	6.02e-14	3
Bst2	1.89628	7.09e-14	3
Ap3m2	1.69437	9.17e-14	3
Wdr441	1.80079	1.55e-13	3
Pard6g	1.44935	2.42e-13	3
Ifitm3	1.78966	3.44e-13	3
Nynrin	1.49879	5.44e-13	3
Bbs7	1.60674	1.16e-12	3
Bzrap1	1.30492	1.64e-12	3
Zfp74	1.37576	1.71e-12	3
Celf4	1.5718	2.87e-12	3
Icam11	1.09825	3.15e-12	3
Usp18	0.939157	4.64e-12	3
4933427D14Rik	1.35799	6.53e-12	3
Tmem176b1	1.01903	9.16e-12	3
AW1120101	1.55525	9.81e-12	3
Afm	1.78493	2.07e-11	3
1190005I06Rik	1.50037	2.08e-11	3
C230035I16Rik	1.41747	2.46e-11	3
Psmc3ip	1.87815	3.58e-11	3
Pole2	1.7722	3.91e-11	3
Prelid2	0.738037	4.56e-11	3
Ptpn4	1.24619	4.72e-11	3
Fbxo4	1.13742	6.21e-11	3
Efcab2	0.972419	9.55e-11	3
Grk61	1.4671	1.52e-10	3
Pag11	0.877945	1.9e-10	3
Oasl2	2.26864	1.99e-10	3
Usp43	1.76059	2.14e-10	3
Ly6e	1.15084	3.59e-10	3
Lrsam11	1.37496	4.73e-10	3
Sftpd1	1.48853	5.82e-10	3
Acvr2a	1.67131	7.53e-10	3
AW011738	1.55657	7.55e-10	3
Clp1	0.4772	7.6e-10	3
2810454H06Rik	1.32993	2.14e-09	3
Ctdp11	0.95793	2.27e-09	3
Abhd2	1.33955	2.36e-09	3
Htatip2	0.627192	2.45e-09	3
Gbp8	1.99969	3.37e-09	3
Pon31	1.68315	3.43e-09	3
Mak	1.28685	3.82e-09	3
Ifit1	2.07724	4.37e-09	3
H2-DMa	2.69847	6.36e-09	3
St3gal3	0.971298	6.62e-09	3
Mcph1	1.42579	7.25e-09	3
Mcm3ap	1.29831	8.49e-09	3
1700029J07Rik	1.94294	8.61e-09	3
Per3	1.22866	1.02e-08	3
Pip4k2a1	0.985108	1.24e-08	3
Gpr1601	1.04801	1.25e-08	3
Phospho2	1.87321	1.49e-08	3
Fam229a	1.90689	1.53e-08	3
BC051226	0.975117	1.74e-08	3
Spa17	1.71105	1.79e-08	3
Fga1	1.55193	1.87e-08	3
Rilpl2	0.840492	2.09e-08	3
Cd74	2.81512	3.05e-08	3
Lcn21	1.65492	3.17e-08	3
Dph2	1.15191	4.36e-08	3
Vegfc	1.32945	4.93e-08	3
Cr1l	1.40092	5.32e-08	3
Lhfp	0.753706	5.64e-08	3
Ppil3	1.20357	7.75e-08	3
Fam199x	1.17378	9.39e-08	3
Rbks	0.926054	1.05e-07	3
Aldh3b1	1.57712	1.83e-07	3
Sgms21	1.23981	1.94e-07	3
Olfml1	0.881873	2.02e-07	3
Slc44a1	1.24671	2.06e-07	3
Tnfsf10	1.78223	2.2e-07	3
Entpd7	1.11333	2.32e-07	3
Phlda11	1.10168	2.38e-07	3
Cep68	0.869739	2.77e-07	3
1700025G04Rik1	0.949355	2.91e-07	3
Dclk3	1.35691	5.42e-07	3
Cbll1	1.4246	5.74e-07	3
Zkscan5	1.52706	6.17e-07	3
Hspb11	1.73562	7.61e-07	3
Rgs11	1.14931	1.14e-06	3
Keap1	0.816429	1.24e-06	3
Lpcat4	1.07262	1.38e-06	3
Mageh1	1.10392	1.61e-06	3
N4bp2l1	0.65802	1.71e-06	3
9230110C19Rik	1.34705	2.06e-06	3
Emc9	0.652474	2.16e-06	3
Gys1	2.12639	2.17e-06	3
Mcat	0.913786	3.03e-06	3
Zfp651	1.1663	3.21e-06	3
Klf71	0.867807	3.41e-06	3
Oxsr1	1.42949	3.5e-06	3
Plcd1	1.08019	4.03e-06	3
Pla2g4a	1.61769	4.07e-06	3
Amy1	0.999609	4.4e-06	3
Psmb81	1.26253	4.72e-06	3
Mtif2	1.16145	4.93e-06	3
Arhgap27	0.925889	5.66e-06	3
Slc16a1	1.50453	6.21e-06	3
Hif1an	0.459329	6.23e-06	3
Rhoj	1.68615	6.82e-06	3
Ulk3	0.938255	8.09e-06	3
Mtrf1	1.10016	8.6e-06	3
Helq	1.94684	8.79e-06	3
Ppp1r3c	1.13643	9.5e-06	3
Zfp385b	2.28859	9.5e-06	3
Tmem161b	1.68729	1.1e-05	3
Prmt10	1.05227	1.12e-05	3
Cmpk2	1.91888	1.24e-05	3
Ikzf2	1.69481	1.28e-05	3
Vps36	1.456	1.31e-05	3
Abhd10	2.33971	1.69e-05	3
Map3k9	1.36758	1.73e-05	3
Lonp1	0.711876	2.15e-05	3
B230219D22Rik	0.842192	2.25e-05	3
Lama31	0.913726	2.39e-05	3
Rnf216	1.3866	2.46e-05	3
Anks4b1	0.960266	3.03e-05	3
Hook2	0.535098	4.62e-05	3
Gpt	1.30037	6.51e-05	3
Zfp956	0.808235	6.7e-05	3
Atr1	1.15482	6.82e-05	3
Rnf152	1.26794	6.99e-05	3
Irf11	1.12634	7.63e-05	3
Cers4	1.08266	8.58e-05	3
Serhl	1.1137	9.59e-05	3
Inpp1	1.11048	9.87e-05	3
Prr51	1.167	0.000100761	3
Dpy19l11	0.620461	0.00010788	3
Fam81a	0.975585	0.000140351	3
Cybb	0.953704	0.000142755	3
Fmn11	1.30787	0.000158093	3
Ankrd27	1.79943	0.000164744	3
Mov10	1.09015	0.000166735	3
Gpc3	1.10554	0.000178841	3
Gmfg1	0.759741	0.00022276	3
Ccp110	0.485413	0.000268887	3
Ticam11	0.819095	0.000271654	3
Mpeg1	1.62645	0.000287842	3
Iqcc	1.40731	0.00029021	3
Atp2c1	1.152	0.000297087	3
Lcorl	1.16338	0.000324297	3
Sertad4	0.719614	0.000343181	3
Fzd1	1.19639	0.000352312	3
Rangap1	0.904039	0.000378015	3
Trim30d	0.504177	0.00039063	3
Fam117a	0.502006	0.000417147	3
Enpp1	1.51021	0.000440318	3
Slc11a2	1.53508	0.000476265	3
Ddx59	1.29504	0.000538347	3
Ccbl1	1.25101	0.000646999	3
Lgr4	2.76025	0.000668082	3
Akap131	0.437088	0.000687836	3
Pdxk	1.17567	0.000701289	3
Nr2c11	0.421137	0.000749968	3
Gtf2e11	1.19439	0.000792969	3
Otud7b	1.34143	0.000840535	3
Ppp1r15b	0.86104	0.000962666	3
Rnf1701	0.639946	0.00101034	3
Cda	1.17313	0.00114257	3
Crebbp	0.923394	0.00117923	3
Cdkal1	0.515059	0.00121105	3
Emc1	0.709922	0.00138622	3
Caprin2	0.795903	0.00161377	3
Car9	1.03102	0.00195892	3
D6Wsu163e1	0.875415	0.00196078	3
Adamts9	1.0308	0.00206595	3
Oasl1	0.632372	0.00219656	3
Ssh2	1.33396	0.00247552	3
Ccdc107	0.826459	0.00261009	3
E2f3	0.98583	0.00266899	3
Sh3d21	0.622658	0.00292309	3
Fam101b	0.898811	0.00294538	3
Serpinb1a	0.995156	0.00304021	3
Cited2	0.906506	0.00304343	3
Esco1	1.34154	0.00304554	3
Phax	1.58645	0.00351935	3
Tmem176a	0.727497	0.00377295	3
Atpaf1	1.42022	0.00464682	3
Cp1	0.46756	0.00488804	3
Mllt10	1.53636	0.0057023	3
Rgs12	0.704553	0.00603798	3
1810034E14Rik	1.62415	0.00625367	3
Dnaja41	0.831579	0.00710581	3
Taf11	0.430916	0.00718101	3
Tap2	0.997659	0.00744616	3
Ccdc821	0.474597	0.00765967	3
Isy1	0.461207	0.00769783	3
Aldh1b1	1.28556	0.00801523	3
Tle6	0.857415	0.00899488	3
Ccdc661	1.09205	0.0101774	3
Kctd20	1.20741	0.0108846	3
Prpf38a	0.76885	0.0119475	3
Atg2b	1.15168	0.0120012	3
C3	2.074	0.0124581	3
Itsn1	0.839057	0.0133553	3
Lrrc51	1.46686	0.0137297	3
Trp53inp11	1.02376	0.0146777	3
Fam193a	1.2555	0.014926	3
Pik3r1	1.58159	0.0156197	3
Car131	1.48258	0.0161178	3
Agpat4	1.54161	0.0167074	3
Galns	0.915371	0.0167321	3
Phc3	1.33116	0.0170882	3
Xrcc6bp1	2.03843	0.0174622	3
Asb7	1.92215	0.0178936	3
Il161	1.41578	0.0221262	3
Ddx46	1.34262	0.0258689	3
Gpatch2	1.18844	0.0291241	3
F2r	1.27012	0.0296305	3
Lrrc14	1.33318	0.0303153	3
Zw10	0.554726	0.0339606	3
Nlrc51	1.82725	0.0351756	3
Eif2s1	0.691164	0.0477482	3
Ly6d	3.97551	5.4e-81	4
S100a6	3.09301	2.7e-67	4
Tff21	2.9715	7.95e-41	4
Anxa1	2.85094	1.38e-35	4
Wfdc2	2.88148	4.48e-33	4
Tspan81	2.31024	1.91e-32	4
Otud7b1	2.07963	3.34e-31	4
Msln1	2.6907	8.64e-31	4
Crip1	2.56793	7.65e-30	4
Arl14	2.98881	9.09e-29	4
Krt191	2.40645	3.49e-27	4
Srd5a1	1.93241	3.54e-27	4
Onecut2	2.36223	4.69e-27	4
Gsto1	2.45662	6.7e-27	4
Tmem255b1	1.5519	5.8e-26	4
Lrsam12	1.58138	5.91e-26	4
Cdkn2b	2.38019	8.94e-26	4
Aqp5	2.21217	6.17e-25	4
Nmrk11	1.37662	1.42e-24	4
Pgbd1	1.66275	1.91e-24	4
Igf2bp2	2.60849	4.52e-24	4
Hic21	1.69979	5.7e-24	4
2200002D01Rik	2.57953	8.07e-24	4
Dnajc121	1.06127	2.04e-23	4
Nrarp	2.20069	3.56e-23	4
Plaur1	1.57663	9.78e-23	4
Piga1	1.35578	1.92e-22	4
Ptger41	0.767729	2.16e-22	4
Itsn11	1.50928	4.76e-22	4
Plac8	2.41341	5.15e-22	4
Impact	0.549324	1.04e-21	4
Pla2g4a1	1.97961	1.38e-21	4
Lrrc511	1.63779	1.42e-21	4
S100a14	2.08952	2.62e-21	4
Gsta4	2.5522	2.75e-21	4
Cd141	2.18232	3.3e-21	4
Ddah1	1.84779	8.54e-21	4
1810010H24Rik	0.930957	1.33e-20	4
Slc38a6	1.92351	3.13e-20	4
Map3k13	1.7551	1.46e-19	4
Dennd2a1	0.82495	1.67e-19	4
Uck21	0.491695	1.7e-19	4
Rap1gds1	1.09335	2.04e-19	4
Sdcbp2	2.18383	2.33e-19	4
Mapk15	0.938802	4.03e-19	4
Tmsb4x	1.39579	4.28e-19	4
Basp11	2.11154	4.44e-19	4
Pramef8	1.03776	4.73e-19	4
Anxa11	0.789021	5.63e-19	4
Dclre1c	1.75056	5.7e-19	4
Trim161	1.71885	6.05e-19	4
Nprl3	1.14053	2.59e-18	4
Mageh11	1.47026	2.79e-18	4
Dennd1c	0.772101	3.21e-18	4
B3gntl1	1.30635	3.33e-18	4
Gabrp1	1.92055	4.14e-18	4
Zfp142	0.954451	4.93e-18	4
Tfcp2l1	2.20022	4.94e-18	4
Cdk20	0.924458	5.54e-18	4
Ap3m21	1.18634	5.72e-18	4
Kbtbd2	1.41904	5.88e-18	4
Tmem203	0.910477	9.08e-18	4
Slc36a1	1.19539	9.89e-18	4
Klf101	0.768818	1.31e-17	4
Dennd5b1	1.06104	1.41e-17	4
Mb21d2	1.17347	1.47e-17	4
Mcat1	0.931212	3.64e-17	4
Sytl1	0.644974	4.45e-17	4
Pkp3	0.584548	7.15e-17	4
Gsn	1.30568	7.26e-17	4
8430408G22Rik1	1.46964	8.2e-17	4
Per21	1.95098	8.36e-17	4
B4galt11	1.55927	8.81e-17	4
Galns1	1.37294	1.18e-16	4
Bgn1	1.92581	1.79e-16	4
Wls1	1.60101	1.83e-16	4
Serpinb1a1	1.56132	2.13e-16	4
Ttc39b	1.6097	2.7e-16	4
Gpld1	1.4978	3.26e-16	4
Reep4	0.860753	3.47e-16	4
Nceh1	0.413344	4.35e-16	4
Krt7	1.50882	5.22e-16	4
Ankrd281	1.05749	1.6e-15	4
Hif1a	1.18942	1.94e-15	4
Ccnh	2.25065	1.96e-15	4
Elf31	2.02506	2.96e-15	4
Fbxo45	1.23537	3.95e-15	4
1700007L15Rik	1.90153	7.04e-15	4
Pls1	1.95159	7.5e-15	4
Adrbk2	0.767608	1.08e-14	4
Jam3	1.44129	1.21e-14	4
Igfbp51	1.95851	1.41e-14	4
Samd1	0.817437	1.41e-14	4
H2afx	0.694809	1.77e-14	4
Klf52	1.4349	1.88e-14	4
Nol9	1.09315	2.12e-14	4
Ctxn1	1.3996	2.75e-14	4
Capn7	0.704344	3.48e-14	4
Cyp3a13	1.83148	3.77e-14	4
Ubtd1	1.20633	6.01e-14	4
Sp21	1.75835	6.38e-14	4
Elac1	1.47858	1.01e-13	4
Cldn21	2.11338	1.03e-13	4
Cd44	2.38263	1.09e-13	4
Tmem54	1.71766	1.4e-13	4
N4bp2l11	0.617006	1.87e-13	4
Gstm2	1.35473	2.28e-13	4
Sertad41	1.46017	2.47e-13	4
Entpd61	1.49833	2.49e-13	4
Ahcyl2	1.62099	2.64e-13	4
Oit1	2.2738	3.32e-13	4
Traf61	1.29692	3.92e-13	4
Wdr77	1.25144	5.57e-13	4
Lin7c1	0.756135	9.11e-13	4
Zfp655	1.31555	9.28e-13	4
Zfp687	0.713486	9.6e-13	4
Zfp236	1.22087	1.05e-12	4
Rap2b1	1.04556	1.62e-12	4
Tmcc31	0.444233	1.94e-12	4
Tbc1d91	1.0303	2e-12	4
Smpd3	1.87831	2.24e-12	4
Mafk1	1.60162	2.31e-12	4
Mycbpap1	1.86958	2.47e-12	4
Ano1	2.23147	2.68e-12	4
Mfsd7b	0.542182	2.84e-12	4
Tbc1d161	1.62678	3.13e-12	4
Isoc2b	0.809971	3.51e-12	4
Kpna6	0.55866	3.73e-12	4
Rabgef11	0.507342	3.77e-12	4
Pdzd8	1.64781	3.82e-12	4
Cep2902	1.34167	4.42e-12	4
Ampd2	0.982374	4.65e-12	4
Pitpnm2	1.27599	5.49e-12	4
Mtus11	1.09797	6.3e-12	4
Car132	1.5335	6.68e-12	4
Wfdc181	0.421654	7.23e-12	4
Kin	1.44771	8.3e-12	4
Car91	1.7112	1.02e-11	4
Gadd45g	1.34095	1.1e-11	4
Fam83e	2.59293	1.33e-11	4
Klhdc7a	0.56159	1.44e-11	4
Cpm	1.11277	2.34e-11	4
Ddx27	0.846819	3.02e-11	4
Slc39a10	0.621344	4.79e-11	4
Sbno1	0.74971	5.82e-11	4
0610009L18Rik1	1.07983	7.43e-11	4
Dcaf17	1.6237	8.82e-11	4
Gfpt1	1.69261	9.08e-11	4
Bahcc1	1.07608	9.14e-11	4
Mettl5	1.43511	9.54e-11	4
Ttc9c	0.786186	1.24e-10	4
Nek3	1.85883	1.28e-10	4
Bcs1l	1.28998	2.21e-10	4
Hif1an1	1.08917	2.32e-10	4
Mknk1	1.68508	2.48e-10	4
Pear1	1.56581	3.79e-10	4
Shroom2	0.482998	4.37e-10	4
Erbb2	1.58452	6.11e-10	4
Specc1l	1.3044	6.16e-10	4
Zfp871	1.1403	6.19e-10	4
Pim31	1.85025	8.16e-10	4
Tep1	0.916886	1.52e-09	4
Sult1a1	0.935159	2.06e-09	4
Bace21	0.917727	3.06e-09	4
Spink4	0.477976	3.45e-09	4
Cdk11	1.11463	4.47e-09	4
Zfp119a	1.65047	4.77e-09	4
Fcgbp1	0.646757	4.78e-09	4
Pdpk11	0.523698	6.13e-09	4
Grasp1	2.15182	6.39e-09	4
Zfp932	1.46908	7.02e-09	4
Sult1c2	1.09158	8.05e-09	4
Cdkn2d1	0.913495	1.05e-08	4
Pmvk1	1.04847	1.25e-08	4
Wee11	0.958062	1.4e-08	4
Bhlhe401	1.20415	1.74e-08	4
Fam46a1	1.51357	1.93e-08	4
Itga2b	1.37142	2.01e-08	4
Pdpn	1.12761	3.43e-08	4
Acyp2	1.01405	3.86e-08	4
Mul1	1.14243	4.77e-08	4
Madd	1.22026	8.44e-08	4
Ikzf21	1.18024	1.22e-07	4
Wdr921	0.852657	1.38e-07	4
Krt81	0.556525	1.64e-07	4
Prkca1	0.600765	1.76e-07	4
Tmem1251	1.12188	1.86e-07	4
Snta1	0.972345	3.59e-07	4
Cyp2s1	1.89422	3.67e-07	4
Inhbb	2.27386	3.69e-07	4
Txnip2	1.50924	3.84e-07	4
Ugt2b34	0.571821	4.67e-07	4
Slc34a2	1.99313	6.12e-07	4
Tppp3	2.08478	6.2e-07	4
Sftpd2	0.703197	6.28e-07	4
Fam167a	1.62047	8.22e-07	4
Nupr11	1.63536	1.37e-06	4
Naa25	1.27629	1.48e-06	4
AW549877	1.40274	1.78e-06	4
Dars	1.33693	2.2e-06	4
Ppfia1	1.49686	2.24e-06	4
Cib11	1.78308	3.6e-06	4
Col27a1	0.443231	4.01e-06	4
Dis3l2	1.09914	4.16e-06	4
Ifrd11	0.806984	5.42e-06	4
Fbxo21	0.971326	7.5e-06	4
Tgif11	0.83951	9.01e-06	4
Muc1	1.02006	1.67e-05	4
Csrp11	0.471499	1.76e-05	4
Bub3	1.69205	1.77e-05	4
Cd24a	1.81547	1.88e-05	4
Nr2f2	1.91258	2.04e-05	4
Lcn22	1.32767	2.18e-05	4
Cand2	0.507842	2.71e-05	4
C230035I16Rik1	1.5899	3.05e-05	4
Eif2ak31	1.41389	3.35e-05	4
Bet11	0.66442	5.58e-05	4
Cep3501	1.93198	6.28e-05	4
Nrp1	0.561562	6.32e-05	4
Rhou1	1.35248	6.74e-05	4
Dennd2d1	1.12959	0.000106628	4
Ttll11	1.35016	0.000109347	4
Snx4	1.22347	0.000190752	4
Slc6a6	0.93104	0.000283277	4
Hspa51	0.80978	0.000334114	4
1700025G04Rik2	1.73453	0.000340603	4
Dffa	1.15301	0.00044763	4
Lgals2	1.63035	0.000542986	4
Gskip1	1.04914	0.000630967	4
Immp2l	1.05515	0.000637349	4
Adsl	0.977668	0.000657987	4
Golga71	1.36902	0.000705517	4
Phlda3	1.4437	0.000890787	4
Ildr21	1.66339	0.000980627	4
Ercc4	1.15955	0.00102662	4
Kctd3	1.31572	0.00115842	4
Calml4	1.70375	0.00140998	4
Pcmtd1	1.74066	0.00215215	4
Mlph	1.64731	0.00236351	4
Gpt1	0.715479	0.00236683	4
Galnt41	1.13898	0.00258733	4
Top2b	1.32122	0.00278742	4
Gprc5a1	1.46884	0.00359143	4
Tpm1	1.83092	0.00397808	4
Jund1	0.777509	0.00431028	4
Bmp21	0.729924	0.00489107	4
Cenpj	1.17727	0.00636155	4
Nudcd1	0.989403	0.00660768	4
Sat1	1.30012	0.0068753	4
Fastkd5	1.21834	0.00847426	4
Tmem45b	0.680973	0.00944705	4
Ttll51	1.12915	0.010543	4
Oasl11	0.438696	0.0143	4
Pard6b1	1.56633	0.0154055	4
Pdzk1ip1	0.697392	0.0391217	4
Zfp329	0.587559	0.0451551	4
