# Supplementary material for: Single-cell transcriptome analysis defines heterogeneity of the murine pancreatic ductal tree
Source: eLife. 2021 May 19;10:e67776. doi: 10.7554/eLife.67776 (PMC8184217; doi:10.7554/eLife.67776)
Supplement: Figure 3—source data 1. [file elife-67776-fig3-data1.xlsx]

## Sheet: DBA+ duct cluster 0 vs 2
Gene	avg_logFC	p_val_adj
Wfdc18	0.732075	1.75e-15
Sparc	0.274299	7.16e-10
Ccnd1	0.255967	1.67e-08
H2-D1	0.297973	2.73e-07
Kcne3	0.284577	1.7e-06
Cftr	0.265204	3.44e-05
Tuba1a	0.262196	4.4e-05
Tgfb2	0.270216	7.79e-05
Ifitm3	0.268368	0.0295514

## Sheet: DBA+ duct cluster 4 vs 1
gene	avg_logFC	p_val_adj
Anxa3	1.16235	7.69e-28
Shisa4	0.578778	4.73e-18
Myl12a	0.50847	3.07e-17
Mfge8	0.830331	7.86e-16
Cxcl16	0.698284	1.31e-15
2200002D01Rik	0.632119	8.39e-15
Myl12b	0.556228	8.32e-13
Dclk1	0.51494	1.51e-11
Ccnd2	0.651093	1.82e-11
Junb	0.596635	3.27e-11
Slco3a1	0.510635	3.58e-11
Ces1d	-0.528857	9.37e-11
Hspg2	0.449031	1.17e-10
Actg1	0.325246	2.38e-10
Nfkbia	0.633259	4.98e-10
Jund	0.498499	5.83e-10
Apoe	-0.399103	2.92e-09
S100a10	0.463501	4.02e-09
Tuba1a	0.577187	2.11e-08
Birc3	0.359957	4.05e-08
Pdpn	0.297827	4.48e-08
Relb	0.43446	4.81e-08
Serinc2	0.333397	6.87e-08
S100a11	0.308541	7.4e-08
Anxa2	0.474421	1.26e-07
Bcam	0.478752	1.32e-07
Tgfb3	0.446744	2.37e-07
Tubb2b	0.255204	3.87e-07
Klf6	0.425863	4.59e-07
Cd2ap	0.490424	4.8e-07
Krt8	0.414767	6.28e-07
Atp1b3	0.256754	7.9e-07
Cldn4	0.404315	1.06e-06
Ppp1r1b	-0.616385	1.59e-06
Sparc	0.439828	1.76e-06
Tmsb4x	0.295322	1.81e-06
Samd4	0.269672	1.92e-06
mt-Cytb	-0.264924	2.52e-06
Mt2	0.611026	2.92e-06
mt-Nd4	-0.267369	2.92e-06
H2-Q4	0.356984	3.86e-06
Cyr61	0.549943	5.33e-06
Nupr1	0.434756	9.46e-06
Itga3	0.343058	1.27e-05
Ambp	-0.43724	2.11e-05
Dsg2	0.313775	2.12e-05
Ankrd1	0.723871	2.16e-05
Tmem176b	0.314157	2.72e-05
Daam1	0.33675	3.26e-05
Tmem176a	0.366289	4.1e-05
Nfkb2	0.298619	4.48e-05
H2-D1	0.424272	6.41e-05
Cd47	0.485212	6.6e-05
Csf1	0.317219	7.22e-05
Krt7	0.368841	7.25e-05
Rnf19a	0.273197	0.000125929
Ltb	0.403591	0.000138806
Bst2	0.446911	0.000149861
Oasl2	0.263041	0.00014991
Tagln2	0.401097	0.000170701
Rras	0.307596	0.000171873
Cd44	0.307229	0.000211185
Foxj1	0.251558	0.000240525
Flrt2	0.313927	0.00024175
Ezr	0.381128	0.000262153
Ahnak	0.457599	0.000306608
F11r	0.376544	0.00034488
Spp1	-0.276999	0.000495978
Rassf3	0.344452	0.000532973
Neurl3	0.258624	0.000563631
Plec	0.252713	0.000649858
Plscr1	0.26367	0.00071242
Gprc5c	0.254481	0.000722059
Tuft1	0.320162	0.000748149
Krt18	0.342605	0.00091765
C3	0.550445	0.000984257
Aars	0.286321	0.000989181
Pigr	-0.646215	0.00103735
Comt	0.360781	0.00116395
Actb	0.328558	0.00125933
Ifrd1	0.282497	0.00134013
Ilk	0.280361	0.00138372
Gadd45b	0.307304	0.00145892
Tprgl	0.263792	0.00161371
Krt19	0.427648	0.00161992
Ptp4a1	0.327698	0.00171975
Wasf2	0.308478	0.00177469
Ifitm3	0.366358	0.00180482
Tpm4	0.265992	0.00228998
Efhd2	0.313611	0.0024586
Sema3c	0.363849	0.00258518
Chmp2b	0.332384	0.00269304
Cdc42ep5	0.250841	0.00305122
Ddx21	0.258689	0.00361768
Tgfb2	0.396496	0.00372671
Myadm	0.293072	0.00406941
Rabep1	0.251852	0.00496495
Set	0.341895	0.00500404
Sppl2a	0.322199	0.00646814
Jag1	0.251072	0.00680353
Rnf213	0.26017	0.00702198
Ttr	-0.580158	0.00796381
Tpm1	0.287944	0.0102097
Il6st	0.274528	0.0112985
Igf1	0.326474	0.0133775
Zfp36l1	0.314207	0.0174369
Lmna	0.305995	0.0178471
Bmyc	-0.420377	0.0313487
Akap13	0.287829	0.0315063
Bnip2	0.259084	0.0327286
Apobec3	0.317683	0.0372364
Rnf11	0.262053	0.042809
Wfdc15b	-0.442944	0.0457064
Psmd11	0.286316	0.046735

## Sheet: duct cluster 4-Dbmt1+Ly6d+ vs 4
Gene	avg_logFC	p_val_adj
Duox2	2.15315	2.68e-22
Cxcl5	3.15232	7.31e-20
Duoxa2	1.72873	7.31e-20
AA467197	1.35355	7.31e-20
Dmbt1	5.27615	8.81e-19
Onecut2	2.57588	7.26e-18
Sptssb	1.17024	1.85e-17
Gsto1	2.27343	2.56e-17
Tspan8	2.35547	3.41e-16
Serpinb1a	1.53115	1.14e-15
Lgals4	2.41	1.94e-15
Ltf	2.31462	2.18e-15
Lgals2	1.88992	4.34e-15
Msln	0.899212	4.34e-15
Tmprss4	0.837508	4.34e-15
Oit1	1.58595	1.53e-14
Plac8	2.35393	6.07e-14
Ugt2b34	1.58523	1.52e-13
Sult1c2	1.18522	2.18e-13
Ecm1	1.42991	5.21e-13
Paqr5	0.609236	9.32e-13
Tff3	1.50798	9.51e-13
Tnfrsf11b	1.04956	9.51e-13
Tmem54	0.911605	9.51e-13
Tmc5	0.797494	9.51e-13
Atp10b	0.696547	9.51e-13
Smpd3	1.57199	3.38e-12
Spink4	3.79548	8.75e-12
Parm1	0.839636	2.42e-11
Calml4	0.842815	4.09e-11
Eps8	0.940113	5.48e-11
Ly6d	2.19228	5.64e-11
Gm15848	0.874199	1.52e-10
Anxa1	1.4109	1.75e-10
Vil1	0.582723	1.75e-10
Tnfaip2	1.16005	1.95e-10
Ctse	0.933131	1.95e-10
Tnip3	0.918377	1.95e-10
Muc4	0.769795	1.95e-10
Napsa	0.72918	1.95e-10
Aoc1	0.654085	1.95e-10
Tm4sf20	0.609055	1.95e-10
Fam83e	0.595134	1.95e-10
Pls1	0.516735	1.95e-10
Fcgbp	1.27297	2.89e-10
Sord	0.930013	8.05e-10
S100a6	3.30868	1.61e-09
Pglyrp1	2.563	1.81e-09
Muc20	0.629266	3.71e-09
Lrg1	0.734124	6.18e-09
Tff2	2.27044	1.24e-08
Cldn2	1.22275	3.52e-08
Wfdc18	2.63458	3.53e-08
Phgr1	0.839487	3.75e-08
Prss35	0.696971	3.75e-08
Serpinb5	0.561365	3.75e-08
Gipc2	0.483014	3.75e-08
Adgrg7	0.434449	3.75e-08
Gata5	0.338612	3.75e-08
Mapk13	0.950851	4.44e-08
Gabrp	1.31247	1.11e-06
Gal3st2	0.490516	1.35e-06
Pear1	0.436111	1.35e-06
Klf5	1.3265	2.46e-06
Camk2b	0.510275	2.82e-06
Tnfsf13os	0.484024	4.2e-06
Cyp3a13	0.593853	6.83e-06
Akr1b7	0.574422	6.83e-06
Gm3336	0.484494	6.83e-06
Ptpru	0.43386	6.83e-06
Sult1d1	0.39785	6.83e-06
Pip5k1b	0.342136	6.83e-06
Tspan1	0.338349	6.83e-06
Slc9a2	0.322254	6.83e-06
Noxa1	0.285543	6.83e-06
Bace2	0.781746	1.4e-05
Lrrc26	0.781008	1.75e-05
Fam167a	0.550258	1.89e-05
Ckmt1	0.952279	5.8e-05
Mfsd4	0.78298	7.64e-05
Golm1	1.39522	8.8e-05
Anxa5	-1.91954	0.000119491
Zfhx4	0.527437	0.000123647
Tbc1d13	0.369863	0.000138566
5730559C18Rik	0.514289	0.000173837
Ifi27l2b	0.689664	0.00018611
Crip1	1.73527	0.00021376
Cp	-1.99945	0.000217004
Myl12a	-1.33996	0.000281883
Kctd14	0.69683	0.000307153
Dbi	-1.11404	0.000507719
Wfdc2	1.36003	0.000539507
2210407C18Rik	0.629025	0.000605136
C130074G19Rik	0.555495	0.000605136
Lamb3	0.604876	0.000682002
Car9	0.483276	0.000687626
Lefty1	0.305627	0.000687626
Atp2a3	0.315471	0.000780976
Nr2f2	1.0228	0.000881182
Ccl28	0.425547	0.000886561
Gsta4	1.21921	0.000922718
Dsg2	-1.11941	0.00120407
Rps6ka1	0.770037	0.00130786
Mgat3	0.486472	0.00157751
Timp3	-1.78663	0.00171168
Zc3h12a	0.514332	0.00192309
Mmp7	1.53213	0.00202938
Prdx1	0.885598	0.0020308
Noxo1	0.563319	0.00211039
Cd44	1.56145	0.00226891
Igsf9	0.569643	0.00246301
Pllp	0.5259	0.00258237
Runx1	0.464863	0.0028472
S100b	0.548575	0.0031382
S100a14	0.446571	0.00334618
Tmsb10	-1.19552	0.00353546
Apoe	-1.30924	0.00353546
Igfbp7	-1.33359	0.00429051
Tc2n	0.741432	0.0048081
Cryab	-1.31235	0.00545238
Dcdc2a	-1.30857	0.00562299
Ugt2b35	0.551841	0.0106055
Cotl1	0.676655	0.0110975
Iyd	0.505164	0.0122316
Frk	0.728277	0.0123492
2200002D01Rik	1.08775	0.0134768
AI413582	0.678764	0.0141085
C4bp	0.69544	0.015114
Slc10a2	0.407025	0.015114
Ppic	0.260043	0.018645
Dram1	0.545138	0.0227888
Lurap1l	-1.29835	0.0242947
Gbp8	0.33527	0.0254682
Fmo2	-1.8021	0.0301524
Id1	0.47362	0.0313609
Mgst1	-0.949814	0.0350884
Ces1d	-1.47998	0.035103
Tmprss2	0.701985	0.0416609
Adam33	-1.38368	0.0419332
Csrp2	-1.09723	0.0448932
