# Supplementary material for: Single-cell transcriptome analysis defines heterogeneity of the murine pancreatic ductal tree
Source: eLife. 2021 May 19;10:e67776. doi: 10.7554/eLife.67776 (PMC8184217; doi:10.7554/eLife.67776)
Supplement: Figure 3—source data 2. [file elife-67776-fig3-data2.xls]

## Sheet: DBA+ duct cluster 0 vs 2
© 2000-2020 QIAGEN. All rights reserved.
Ingenuity Canonical Pathways	-log(p-value)	Ratio	z-score	Molecules
Cell Cycle: G1/S Checkpoint Regulation	3.63	0.0299	#NUM!	CCND1,TGFB2
Cyclins and Cell Cycle Regulation	3.46	0.0247	#NUM!	CCND1,TGFB2
Chronic Myeloid Leukemia Signaling	3.25	0.0194	#NUM!	CCND1,TGFB2
PD-1, PD-L1 cancer immunotherapy pathway	3.23	0.0189	#NUM!	HLA-A,TGFB2
Pancreatic Adenocarcinoma Signaling	3.2	0.0183	#NUM!	CCND1,TGFB2
Breast Cancer Regulation by Stathmin1	3.05	0.00508	#NUM!	CCND1,TGFB2,TUBA1A
Aryl Hydrocarbon Receptor Signaling	2.97	0.014	#NUM!	CCND1,TGFB2
Factors Promoting Cardiogenesis in Vertebrates	2.93	0.0133	#NUM!	CCND1,TGFB2
Phagosome Maturation	2.92	0.0132	#NUM!	HLA-A,TUBA1A
Epithelial Adherens Junction Signaling	2.92	0.0132	#NUM!	TGFB2,TUBA1A
Germ Cell-Sertoli Cell Junction Signaling	2.82	0.0117	#NUM!	TGFB2,TUBA1A
Wnt/β-catenin Signaling	2.8	0.0116	#NUM!	CCND1,TGFB2
AMPK Signaling	2.62	0.00935	#NUM!	CCND1,CFTR
Colorectal Cancer Metastasis Signaling	2.48	0.00791	#NUM!	CCND1,TGFB2
Systemic Lupus Erythematosus In B Cell Signaling Pathway	2.41	0.00727	#NUM!	CCND1,TGFB2
Senescence Pathway	2.41	0.00727	#NUM!	CCND1,TGFB2
Neuroinflammation Signaling Pathway	2.34	0.00667	#NUM!	HLA-A,TGFB2
GADD45 Signaling	2.18	0.0526	#NUM!	CCND1
Hepatic Fibrosis Signaling Pathway	2.16	0.00543	#NUM!	CCND1,TGFB2
Molecular Mechanisms of Cancer	2.11	0.00512	#NUM!	CCND1,TGFB2
Apelin Cardiac Fibroblast Signaling Pathway	2.09	0.0435	#NUM!	TGFB2
Estrogen-mediated S-phase Entry	2.04	0.0385	#NUM!	CCND1
Cytotoxic T Lymphocyte-mediated Apoptosis of Target Cells	1.92	0.0294	#NUM!	HLA-A
B Cell Development	1.9	0.0278	#NUM!	HLA-A
Interferon Signaling	1.9	0.0278	#NUM!	IFITM3
Cell Cycle Regulation by BTG Family Proteins	1.89	0.027	#NUM!	CCND1
Antiproliferative Role of TOB in T Cell Signaling	1.86	0.0256	#NUM!	TGFB2
Antigen Presentation Pathway	1.86	0.0256	#NUM!	HLA-A
FAT10 Cancer Signaling Pathway	1.79	0.0217	#NUM!	TGFB2
PFKFB4 Signaling Pathway	1.79	0.0217	#NUM!	TGFB2
Graft-versus-Host Disease Signaling	1.77	0.0208	#NUM!	HLA-A
Autoimmune Thyroid Disease Signaling	1.77	0.0204	#NUM!	HLA-A
Melanoma Signaling	1.76	0.02	#NUM!	CCND1
Nur77 Signaling in T Lymphocytes	1.69	0.0169	#NUM!	HLA-A
Endometrial Cancer Signaling	1.68	0.0167	#NUM!	CCND1
ErbB2-ErbB3 Signaling	1.64	0.0154	#NUM!	CCND1
Regulation of Cellular Mechanics by Calpain Protease	1.64	0.0154	#NUM!	CCND1
Calcium-induced T Lymphocyte Apoptosis	1.64	0.0152	#NUM!	HLA-A
Remodeling of Epithelial Adherens Junctions	1.63	0.0147	#NUM!	TUBA1A
GM-CSF Signaling	1.61	0.0143	#NUM!	CCND1
Small Cell Lung Cancer Signaling	1.61	0.0141	#NUM!	CCND1
Caveolar-mediated Endocytosis Signaling	1.6	0.0137	#NUM!	HLA-A
T Helper Cell Differentiation	1.6	0.0137	#NUM!	HLA-A
Non-Small Cell Lung Cancer Signaling	1.6	0.0137	#NUM!	CCND1
Estrogen-Dependent Breast Cancer Signaling	1.59	0.0135	#NUM!	CCND1
VDR/RXR Activation	1.57	0.0128	#NUM!	TGFB2
IL-7 Signaling Pathway	1.57	0.0128	#NUM!	CCND1
Thyroid Cancer Signaling	1.56	0.0127	#NUM!	CCND1
BEX2 Signaling Pathway	1.56	0.0127	#NUM!	CCND1
HER-2 Signaling in Breast Cancer	1.53	0.0119	#NUM!	CCND1
IL-4 Signaling	1.53	0.0118	#NUM!	HLA-A
Allograft Rejection Signaling	1.52	0.0116	#NUM!	HLA-A
CTLA4 Signaling in Cytotoxic T Lymphocytes	1.51	0.0112	#NUM!	HLA-A
Acute Myeloid Leukemia Signaling	1.51	0.0112	#NUM!	CCND1
Crosstalk between Dendritic Cells and Natural Killer Cells	1.51	0.0112	#NUM!	HLA-A
Regulation of IL-2 Expression in Activated and Anergic T Lymphocytes	1.51	0.0112	#NUM!	TGFB2
Altered T Cell and B Cell Signaling in Rheumatoid Arthritis	1.5	0.0111	#NUM!	HLA-A
OX40 Signaling Pathway	1.5	0.0111	#NUM!	HLA-A
Prostate Cancer Signaling	1.5	0.011	#NUM!	CCND1
Communication between Innate and Adaptive Immune Cells	1.48	0.0104	#NUM!	HLA-A
TGF-β Signaling	1.48	0.0104	#NUM!	TGFB2
Bladder Cancer Signaling	1.47	0.0103	#NUM!	CCND1
p53 Signaling	1.47	0.0102	#NUM!	CCND1
Virus Entry via Endocytic Pathways	1.43	0.00935	#NUM!	HLA-A
Glioma Signaling	1.42	0.00909	#NUM!	CCND1
iCOS-iCOSL Signaling in T Helper Cells	1.42	0.00901	#NUM!	HLA-A
HGF Signaling	1.42	0.00901	#NUM!	CCND1
Type I Diabetes Mellitus Signaling	1.42	0.00901	#NUM!	HLA-A
Endocannabinoid Developing Neuron Pathway	1.4	0.0087	#NUM!	CCND1
Neuroprotective Role of THOP1 in Alzheimer's Disease	1.39	0.00855	#NUM!	HLA-A
p38 MAPK Signaling	1.39	0.00847	#NUM!	TGFB2
CD28 Signaling in T Helper Cells	1.38	0.00833	#NUM!	HLA-A
Th1 Pathway	1.38	0.00826	#NUM!	HLA-A
PTEN Signaling	1.36	0.00794	#NUM!	CCND1
14-3-3-mediated Signaling	1.36	0.00787	#NUM!	TUBA1A
IL-12 Signaling and Production in Macrophages	1.34	0.00758	#NUM!	TGFB2
Human Embryonic Stem Cell Pluripotency	1.33	0.00741	#NUM!	TGFB2
STAT3 Pathway	1.33	0.00741	#NUM!	TGFB2
Androgen Signaling	1.33	0.00735	#NUM!	CCND1
Th2 Pathway	1.33	0.00735	#NUM!	HLA-A
Ovarian Cancer Signaling	1.32	0.00719	#NUM!	CCND1
Hereditary Breast Cancer Signaling	1.32	0.00714	#NUM!	CCND1
Endocannabinoid Cancer Inhibition Pathway	1.31	0.00699	#NUM!	CCND1
Role of Pattern Recognition Receptors in Recognition of Bacteria and Viruses	1.28	0.00649	#NUM!	TGFB2
PKCθ Signaling in T Lymphocytes	1.27	0.00645	#NUM!	HLA-A
HMGB1 Signaling	1.25	0.00606	#NUM!	TGFB2
Glioblastoma Multiforme Signaling	1.25	0.00606	#NUM!	CCND1
Cdc42 Signaling	1.24	0.00599	#NUM!	HLA-A
Tight Junction Signaling	1.24	0.00595	#NUM!	TGFB2
Th1 and Th2 Activation Pathway	1.23	0.00585	#NUM!	HLA-A
PI3K/AKT Signaling	1.22	0.00571	#NUM!	CCND1
T Cell Exhaustion Signaling Pathway	1.22	0.00571	#NUM!	HLA-A
Role of NFAT in Regulation of the Immune Response	1.21	0.00552	#NUM!	HLA-A
Dendritic Cell Maturation	1.2	0.00546	#NUM!	HLA-A
Hepatic Cholestasis	1.2	0.00541	#NUM!	TGFB2
Sertoli Cell-Sertoli Cell Junction Signaling	1.2	0.00541	#NUM!	TUBA1A
Hepatic Fibrosis / Hepatic Stellate Cell Activation	1.2	0.00538	#NUM!	TGFB2
PPARα/RXRα Activation	1.19	0.00526	#NUM!	TGFB2
ILK Signaling	1.19	0.00526	#NUM!	CCND1
Regulation of the Epithelial-Mesenchymal Transition Pathway	1.18	0.00521	#NUM!	TGFB2
RAR Activation	1.18	0.00515	#NUM!	TGFB2
Natural Killer Cell Signaling	1.17	0.00508	#NUM!	HLA-A
Gap Junction Signaling	1.17	0.00505	#NUM!	TUBA1A
IL-8 Signaling	1.17	0.005	#NUM!	CCND1
Role of NFAT in Cardiac Hypertrophy	1.14	0.00467	#NUM!	TGFB2
EIF2 Signaling	1.12	0.00446	#NUM!	CCND1
Systemic Lupus Erythematosus Signaling	1.11	0.00437	#NUM!	HLA-A
Cardiac Hypertrophy Signaling	1.09	0.00417	#NUM!	TGFB2
Protein Ubiquitination Pathway	1.04	0.00366	#NUM!	HLA-A
Sirtuin Signaling Pathway	1.01	0.00344	#NUM!	TUBA1A
Role of Macrophages, Fibroblasts and Endothelial Cells in Rheumatoid Arthritis	0.979	0.00321	#NUM!	CCND1
Estrogen Receptor Signaling	0.959	0.00305	#NUM!	CCND1
Systemic Lupus Erythematosus In T Cell Signaling Pathway	0.955	0.003	#NUM!	HLA-A
Glucocorticoid Receptor Signaling	0.951	0.00298	#NUM!	TGFB2
Protein Kinase A Signaling	0.879	0.00251	#NUM!	TGFB2
Axonal Guidance Signaling	0.801	0.00207	#NUM!	TUBA1A
Cardiac Hypertrophy Signaling (Enhanced)	0.799	0.00205	#NUM!	TGFB2

## Sheet: DBA+ duct cluster 4 vs 1
© 2000-2020 QIAGEN. All rights reserved.
Ingenuity Canonical Pathways	-log(p-value)	Ratio	z-score	Molecules
Sertoli Cell-Sertoli Cell Junction Signaling	7.71	0.0541	#NUM!	ACTB,ACTG1,CLDN4,F11R,ILK,ITGA3,RRAS,TGFB3,TUBA1A,TUBB2B
Germ Cell-Sertoli Cell Junction Signaling	6.89	0.0526	#NUM!	ACTB,ACTG1,ILK,ITGA3,RRAS,TGFB2,TGFB3,TUBA1A,TUBB2B
RhoA Signaling	5.69	0.0569	2.646	ACTB,ACTG1,CDC42EP5,EZR,IGF1,MYL12A,MYL12B
RhoGDI Signaling	5.63	0.0444	-2.828	ACTB,ACTG1,CD44,EZR,ITGA3,MYL12A,MYL12B,WASF2
Altered T Cell and B Cell Signaling in Rheumatoid Arthritis	5.35	0.0667	#NUM!	CSF1,HLA-A,LTB,NFKB2,RELB,SPP1
Death Receptor Signaling	5.32	0.0659	0.816	ACTB,ACTG1,BIRC3,LMNA,NFKB2,NFKBIA
Actin Cytoskeleton Signaling	5.01	0.0367	2.828	ACTB,ACTG1,EZR,ITGA3,MYL12A,MYL12B,RRAS,WASF2
Tight Junction Signaling	4.8	0.0417	#NUM!	ACTB,ACTG1,CLDN4,F11R,NFKB2,TGFB2,TGFB3
Signaling by Rho Family GTPases	4.66	0.0328	2.828	ACTB,ACTG1,CDC42EP5,EZR,ITGA3,MYL12A,MYL12B,NFKB2
Acute Phase Response Signaling	4.62	0.0391	2.646	AMBP,C3,IL6ST,NFKB2,NFKBIA,RRAS,TTR
Glucocorticoid Receptor Signaling	4.49	0.0268	#NUM!	ACTB,KRT18,KRT19,KRT7,KRT8,NFKBIA,RRAS,TGFB2,TGFB3
Leukocyte Extravasation Signaling	4.36	0.0355	2.449	ACTB,ACTG1,CD44,CLDN4,EZR,F11R,ITGA3
Hepatic Fibrosis Signaling Pathway	4.18	0.0245	1.667	ITGA3,MYL12A,MYL12B,NFKB2,NFKBIA,RRAS,SPP1,TGFB2,TGFB3
Crosstalk between Dendritic Cells and Natural Killer Cells	4.18	0.0562	#NUM!	ACTB,ACTG1,HLA-A,LTB,NFKB2
Regulation of IL-2 Expression in Activated and Anergic T Lymphocytes	4.18	0.0562	#NUM!	NFKB2,NFKBIA,RRAS,TGFB2,TGFB3
FAT10 Cancer Signaling Pathway	4.17	0.087	2	NFKB2,NFKBIA,TGFB2,TGFB3
Integrin Signaling	4.14	0.0329	2.646	ACTB,ACTG1,ILK,ITGA3,MYL12A,MYL12B,RRAS
Epithelial Adherens Junction Signaling	4.05	0.0395	#NUM!	ACTB,ACTG1,RRAS,TGFB2,TUBA1A,TUBB2B
Apoptosis Signaling	3.95	0.0505	-0.447	BIRC3,LMNA,NFKB2,NFKBIA,RRAS
Lymphotoxin β Receptor Signaling	3.93	0.0755	#NUM!	LTB,NFKB2,NFKBIA,RELB
Protein Kinase A Signaling	3.91	0.0226	-0.816	AKAP13,MYL12A,MYL12B,NFKB2,NFKBIA,PPP1R1B,PTP4A1,TGFB2,TGFB3
Virus Entry via Endocytic Pathways	3.8	0.0467	#NUM!	ACTB,ACTG1,HLA-A,ITGA3,RRAS
PI3K/AKT Signaling	3.72	0.0343	2.236	IL6ST,ILK,ITGA3,NFKB2,NFKBIA,RRAS
Hepatic Cholestasis	3.59	0.0324	#NUM!	LTB,NFKB2,NFKBIA,SLCO3A1,TGFB2,TGFB3
Hepatic Fibrosis / Hepatic Stellate Cell Activation	3.58	0.0323	#NUM!	CSF1,IGF1,KLF6,NFKB2,TGFB2,TGFB3
LXR/RXR Activation	3.55	0.0413	-1.342	AMBP,APOE,C3,NFKB2,TTR
Remodeling of Epithelial Adherens Junctions	3.51	0.0588	#NUM!	ACTB,ACTG1,TUBA1A,TUBB2B
Agranulocyte Adhesion and Diapedesis	3.49	0.0311	#NUM!	ACTB,ACTG1,CLDN4,CXCL16,EZR,ITGA3
Systemic Lupus Erythematosus In B Cell Signaling Pathway	3.46	0.0255	2.646	CCND2,IL6ST,LTB,NFKB2,RRAS,TGFB2,TGFB3
TNFR2 Signaling	3.41	0.1	#NUM!	BIRC3,NFKB2,NFKBIA
Gα12/13 Signaling	3.4	0.0385	2	MYL12A,MYL12B,NFKB2,NFKBIA,RRAS
Semaphorin Neuronal Repulsive Signaling Pathway	3.4	0.0385	0.447	CD44,ITGA3,MYL12A,MYL12B,RRAS
Caveolar-mediated Endocytosis Signaling	3.39	0.0548	#NUM!	ACTB,ACTG1,HLA-A,ITGA3
Agrin Interactions at Neuromuscular Junction	3.28	0.0513	2	ACTB,ACTG1,ITGA3,RRAS
Cardiac Hypertrophy Signaling (Enhanced)	3.28	0.0185	2.828	AKAP13,IGF1,IL6ST,ITGA3,LTB,NFKB2,RRAS,TGFB2,TGFB3
Molecular Mechanisms of Cancer	3.25	0.0205	#NUM!	BIRC3,CCND2,ITGA3,NFKB2,NFKBIA,RRAS,TGFB2,TGFB3
TWEAK Signaling	3.21	0.0857	#NUM!	BIRC3,NFKB2,NFKBIA
NF-κB Activation by Viruses	3.2	0.0488	2	ITGA3,NFKB2,NFKBIA,RRAS
PEDF Signaling	3.2	0.0488	#NUM!	NFKB2,NFKBIA,RRAS,WASF2
Role of Osteoblasts, Osteoclasts and Chondrocytes in Rheumatoid Arthritis	3.19	0.0273	#NUM!	BIRC3,CSF1,IGF1,ITGA3,NFKBIA,SPP1
Role of Pattern Recognition Receptors in Recognition of Bacteria and Viruses	3.07	0.0325	#NUM!	C3,LTB,NFKB2,TGFB2,TGFB3
Mechanisms of Viral Exit from Host Cells	3.01	0.0732	#NUM!	ACTB,ACTG1,CHMP2B
Cardiac Hypertrophy Signaling	3	0.025	2.449	IGF1,MYL12A,MYL12B,RRAS,TGFB2,TGFB3
Regulation of Actin-based Motility by Rho	2.97	0.0426	2	ACTB,ITGA3,MYL12A,MYL12B
FAK Signaling	2.96	0.0421	#NUM!	ACTB,ACTG1,ITGA3,RRAS
HMGB1 Signaling	2.94	0.0303	2	LTB,NFKB2,RRAS,TGFB2,TGFB3
PAK Signaling	2.92	0.0412	2	ITGA3,MYL12A,MYL12B,RRAS
Cdc42 Signaling	2.91	0.0299	2	CDC42EP5,HLA-A,ITGA3,MYL12A,MYL12B
Phospholipase C Signaling	2.84	0.0233	2.449	AHNAK,ITGA3,MYL12A,MYL12B,NFKB2,RRAS
Chronic Myeloid Leukemia Signaling	2.83	0.0388	#NUM!	NFKB2,RRAS,TGFB2,TGFB3
TNFR1 Signaling	2.76	0.06	#NUM!	BIRC3,NFKB2,NFKBIA
Paxillin Signaling	2.75	0.037	2	ACTB,ACTG1,ITGA3,RRAS
Dendritic Cell Maturation	2.74	0.0273	2.236	HLA-A,LTB,NFKB2,NFKBIA,RELB
Rac Signaling	2.69	0.0357	2	CD44,ITGA3,NFKB2,RRAS
Senescence Pathway	2.69	0.0218	1.633	GADD45B,NFKB2,RRAS,TGFB2,TGFB3,ZFP36L1
Regulation Of The Epithelial Mesenchymal Transition By Growth Factors Pathway	2.69	0.0266	2.236	LTB,NFKB2,RRAS,TGFB2,TGFB3
NRF2-mediated Oxidative Stress Response	2.68	0.0265	#NUM!	ACTB,ACTG1,JUNB,JUND,RRAS
PPARα/RXRα Activation	2.67	0.0263	-2	NFKB2,NFKBIA,RRAS,TGFB2,TGFB3
ILK Signaling	2.67	0.0263	2.236	ACTB,ACTG1,ILK,KRT18,NFKB2
Axonal Guidance Signaling	2.66	0.0165	#NUM!	IGF1,ITGA3,MYL12A,MYL12B,RRAS,SEMA3C,TUBA1A,TUBB2B
Regulation of the Epithelial-Mesenchymal Transition Pathway	2.65	0.026	#NUM!	JAG1,NFKB2,RRAS,TGFB2,TGFB3
Clathrin-mediated Endocytosis Signaling	2.64	0.0259	#NUM!	ACTB,ACTG1,APOE,CD2AP,IGF1
RAR Activation	2.63	0.0258	#NUM!	ACTB,NFKB2,RELB,TGFB2,TGFB3
Airway Pathology in Chronic Obstructive Pulmonary Disease	2.61	0.0339	#NUM!	AMBP,LTB,TGFB2,TGFB3
Gap Junction Signaling	2.59	0.0253	#NUM!	ACTB,ACTG1,RRAS,TUBA1A,TUBB2B
MSP-RON Signaling Pathway	2.58	0.0517	#NUM!	ACTB,ACTG1,CSF1
PCP pathway	2.53	0.05	#NUM!	DAAM1,JUNB,JUND
IL-6 Signaling	2.52	0.032	2	IL6ST,NFKB2,NFKBIA,RRAS
Induction of Apoptosis by HIV1	2.51	0.0492	#NUM!	BIRC3,NFKB2,NFKBIA
Neuroinflammation Signaling Pathway	2.51	0.0201	2.449	BIRC3,HLA-A,MFGE8,NFKB2,TGFB2,TGFB3
FXR/RXR Activation	2.51	0.0317	#NUM!	AMBP,APOE,C3,TTR
PTEN Signaling	2.51	0.0317	-2	ILK,ITGA3,NFKB2,RRAS
Osteoarthritis Pathway	2.47	0.0237	1	ANXA2,ITGA3,JAG1,NFKB2,SPP1
Cellular Effects of Sildenafil (Viagra)	2.45	0.0305	#NUM!	ACTB,ACTG1,MYL12A,MYL12B
Role of NFAT in Cardiac Hypertrophy	2.44	0.0234	2.236	IGF1,IL6ST,RRAS,TGFB2,TGFB3
GADD45 Signaling	2.44	0.105	#NUM!	CCND2,GADD45B
IL-12 Signaling and Production in Macrophages	2.44	0.0303	#NUM!	APOE,NFKB2,TGFB2,TGFB3
Regulation of Cellular Mechanics by Calpain Protease	2.43	0.0462	#NUM!	EZR,ITGA3,RRAS
Role of Macrophages, Fibroblasts and Endothelial Cells in Rheumatoid Arthritis	2.42	0.0192	#NUM!	CSF1,DAAM1,IL6ST,LTB,NFKBIA,RRAS
STAT3 Pathway	2.4	0.0296	#NUM!	IGF1,IL6ST,RRAS,TGFB2
Cell Cycle: G1/S Checkpoint Regulation	2.4	0.0448	#NUM!	CCND2,TGFB2,TGFB3
PI3K Signaling in B Lymphocytes	2.37	0.029	2	C3,NFKB2,NFKBIA,RRAS
Aryl Hydrocarbon Receptor Signaling	2.31	0.028	0	CCND2,NFKB2,TGFB2,TGFB3
Estrogen-Dependent Breast Cancer Signaling	2.28	0.0405	#NUM!	IGF1,NFKB2,RRAS
Apelin Cardiac Fibroblast Signaling Pathway	2.28	0.087	#NUM!	TGFB2,TGFB3
Angiopoietin Signaling	2.26	0.04	#NUM!	NFKB2,NFKBIA,RRAS
Erythropoietin Signaling	2.24	0.0395	#NUM!	NFKB2,NFKBIA,RRAS
BEX2 Signaling Pathway	2.2	0.038	#NUM!	NFKB2,NFKBIA,SPP1
PKCθ Signaling in T Lymphocytes	2.19	0.0258	2	HLA-A,NFKB2,NFKBIA,RRAS
Cyclins and Cell Cycle Regulation	2.17	0.037	#NUM!	CCND2,TGFB2,TGFB3
LPS-stimulated MAPK Signaling	2.15	0.0366	#NUM!	NFKB2,NFKBIA,RRAS
HOTAIR Regulatory Pathway	2.14	0.025	0	CD44,NFKB2,NFKBIA,SPP1
Colorectal Cancer Metastasis Signaling	2.14	0.0198	#NUM!	IL6ST,NFKB2,RRAS,TGFB2,TGFB3
Breast Cancer Regulation by Stathmin1	2.14	0.0135	#NUM!	CCND2,GPRC5C,IGF1,NFKB2,RRAS,TGFB2,TUBA1A,TUBB2B
Tec Kinase Signaling	2.11	0.0244	2	ACTB,ACTG1,ITGA3,NFKB2
RANK Signaling in Osteoclasts	2.07	0.0341	#NUM!	BIRC3,NFKB2,NFKBIA
OX40 Signaling Pathway	2.04	0.0333	#NUM!	HLA-A,NFKB2,NFKBIA
Prostate Cancer Signaling	2.03	0.033	#NUM!	NFKB2,NFKBIA,RRAS
Wnt/β-catenin Signaling	2.03	0.0231	#NUM!	CD44,ILK,TGFB2,TGFB3
L-DOPA Degradation	2.02	0.5	#NUM!	COMT
4-1BB Signaling in T Lymphocytes	2	0.0625	#NUM!	NFKB2,NFKBIA
Fcγ Receptor-mediated Phagocytosis in Macrophages and Monocytes	1.99	0.0319	#NUM!	ACTB,ACTG1,EZR
NF-κB Signaling	1.97	0.0223	1	NFKB2,NFKBIA,RELB,RRAS
Granulocyte Adhesion and Diapedesis	1.97	0.0222	#NUM!	CLDN4,CXCL16,EZR,ITGA3
TGF-β Signaling	1.97	0.0312	#NUM!	RRAS,TGFB2,TGFB3
Role of NFAT in Regulation of the Immune Response	1.96	0.0221	#NUM!	HLA-A,NFKB2,NFKBIA,RRAS
Amyotrophic Lateral Sclerosis Signaling	1.95	0.0309	#NUM!	BIRC3,IGF1,RNF19A
Inhibition of Angiogenesis by TSP1	1.94	0.0588	#NUM!	CD47,HSPG2
MIF-mediated Glucocorticoid Regulation	1.94	0.0588	#NUM!	NFKB2,NFKBIA
VEGF Signaling	1.93	0.0303	#NUM!	ACTB,ACTG1,RRAS
IL-17A Signaling in Fibroblasts	1.92	0.0571	#NUM!	NFKB2,NFKBIA
PPAR Signaling	1.87	0.0288	#NUM!	NFKB2,NFKBIA,RRAS
T Cell Receptor Signaling	1.86	0.0286	#NUM!	NFKB2,NFKBIA,RRAS
PD-1, PD-L1 cancer immunotherapy pathway	1.85	0.0283	#NUM!	HLA-A,TGFB2,TGFB3
CDK5 Signaling	1.83	0.0278	#NUM!	ITGA3,PPP1R1B,RRAS
April Mediated Signaling	1.83	0.0513	#NUM!	NFKB2,NFKBIA
Antiproliferative Role of TOB in T Cell Signaling	1.83	0.0513	#NUM!	TGFB2,TGFB3
Pancreatic Adenocarcinoma Signaling	1.82	0.0275	#NUM!	NFKB2,TGFB2,TGFB3
iCOS-iCOSL Signaling in T Helper Cells	1.8	0.027	#NUM!	HLA-A,NFKB2,NFKBIA
Type I Diabetes Mellitus Signaling	1.8	0.027	#NUM!	HLA-A,NFKB2,NFKBIA
B Cell Activating Factor Signaling	1.79	0.0488	#NUM!	NFKB2,NFKBIA
MIF Regulation of Innate Immunity	1.77	0.0476	#NUM!	NFKB2,NFKBIA
Role of IL-17F in Allergic Inflammatory Airway Diseases	1.77	0.0476	#NUM!	IGF1,NFKB2
Thrombin Signaling	1.76	0.0192	#NUM!	MYL12A,MYL12B,NFKB2,RRAS
Oncostatin M Signaling	1.75	0.0465	#NUM!	IL6ST,RRAS
BAG2 Signaling Pathway	1.75	0.0465	#NUM!	ANXA2,NFKB2
fMLP Signaling in Neutrophils	1.75	0.0259	#NUM!	NFKB2,NFKBIA,RRAS
Role of Tissue Factor in Cancer	1.74	0.0256	#NUM!	CSF1,ITGA3,RRAS
Role of RIG1-like Receptors in Antiviral Innate Immunity	1.73	0.0455	#NUM!	NFKB2,NFKBIA
IL-23 Signaling Pathway	1.73	0.0455	#NUM!	NFKB2,NFKBIA
iNOS Signaling	1.71	0.0444	#NUM!	NFKB2,NFKBIA
CD28 Signaling in T Helper Cells	1.71	0.025	#NUM!	HLA-A,NFKB2,NFKBIA
Estrogen Receptor Signaling	1.69	0.0152	2.236	IGF1,MYL12A,MYL12B,NFKB2,RRAS
PFKFB4 Signaling Pathway	1.69	0.0435	#NUM!	TGFB2,TGFB3
Triacylglycerol Degradation	1.68	0.0426	#NUM!	AARS1,CES1
14-3-3-mediated Signaling	1.64	0.0236	#NUM!	RRAS,TUBA1A,TUBB2B
Atherosclerosis Signaling	1.64	0.0236	#NUM!	APOE,CSF1,NFKB2
CD27 Signaling in Lymphocytes	1.58	0.0377	#NUM!	NFKB2,NFKBIA
Role of IL-17A in Arthritis	1.57	0.037	#NUM!	NFKB2,NFKBIA
Hereditary Breast Cancer Signaling	1.53	0.0214	#NUM!	ACTB,GADD45B,RRAS
CNTF Signaling	1.52	0.0351	#NUM!	IL6ST,RRAS
Maturity Onset Diabetes of Young (MODY) Signaling	1.49	0.0339	#NUM!	APOE,NFKB2
Endometrial Cancer Signaling	1.48	0.0333	#NUM!	ILK,RRAS
Phagosome Maturation	1.45	0.0199	#NUM!	HLA-A,TUBA1A,TUBB2B
Activation of IRF by Cytosolic Pattern Recognition Receptors	1.44	0.0317	#NUM!	NFKB2,NFKBIA
Role of PI3K/AKT Signaling in the Pathogenesis of Influenza	1.43	0.0312	#NUM!	NFKB2,NFKBIA
IL-17A Signaling in Airway Cells	1.43	0.0312	#NUM!	NFKB2,NFKBIA
Salvage Pathways of Pyrimidine Deoxyribonucleotides	1.43	0.125	#NUM!	APOBEC3B
CD40 Signaling	1.42	0.0308	#NUM!	NFKB2,NFKBIA
IL-10 Signaling	1.37	0.029	#NUM!	NFKB2,NFKBIA
SPINK1 General Cancer Pathway	1.37	0.029	#NUM!	Mt2,RRAS
Small Cell Lung Cancer Signaling	1.35	0.0282	#NUM!	NFKB2,NFKBIA
CXCR4 Signaling	1.34	0.018	#NUM!	MYL12A,MYL12B,RRAS
ERK5 Signaling	1.34	0.0278	#NUM!	IL6ST,RRAS
Actin Nucleation by ARP-WASP Complex	1.34	0.0278	#NUM!	ITGA3,RRAS
T Helper Cell Differentiation	1.33	0.0274	#NUM!	HLA-A,IL6ST
Glioma Invasiveness Signaling	1.32	0.027	#NUM!	CD44,RRAS
IL-15 Signaling	1.3	0.0267	#NUM!	NFKB2,RRAS
Toll-like Receptor Signaling	1.29	0.0263	#NUM!	NFKB2,NFKBIA
Macropinocytosis Signaling	1.29	0.0263	#NUM!	CSF1,RRAS
Dopamine Receptor Signaling	1.28	0.026	#NUM!	COMT,PPP1R1B
VDR/RXR Activation	1.27	0.0256	#NUM!	SPP1,TGFB2
Thyroid Cancer Signaling	1.26	0.0253	#NUM!	IGF1,RRAS
Hematopoiesis from Multipotent Stem Cells	1.26	0.0833	#NUM!	CSF1
JAK/Stat Signaling	1.25	0.025	#NUM!	NFKB2,RRAS
B Cell Receptor Signaling	1.24	0.0162	#NUM!	NFKB2,NFKBIA,RRAS
Production of Nitric Oxide and Reactive Oxygen Species in Macrophages	1.22	0.016	#NUM!	APOE,NFKB2,NFKBIA
Regulation Of The Epithelial Mesenchymal Transition In Development Pathway	1.22	0.0238	#NUM!	JAG1,NFKB2
IL-4 Signaling	1.21	0.0235	#NUM!	HLA-A,RRAS
BMP signaling pathway	1.21	0.0235	#NUM!	NFKB2,RRAS
Ceramide Signaling	1.18	0.0227	#NUM!	NFKB2,RRAS
Acute Myeloid Leukemia Signaling	1.17	0.0225	#NUM!	NFKB2,RRAS
Natural Killer Cell Signaling	1.17	0.0152	#NUM!	HLA-A,NFKB2,RRAS
Adrenomedullin signaling pathway	1.17	0.0152	#NUM!	C3,NFKB2,RRAS
IL-1 Signaling	1.16	0.022	#NUM!	NFKB2,NFKBIA
IL-8 Signaling	1.15	0.015	#NUM!	CCND2,MYL12B,RRAS
HIF1α Signaling	1.13	0.0146	#NUM!	IGF1,RRAS,TGFB2
Systemic Lupus Erythematosus In T Cell Signaling Pathway	1.12	0.012	1	CD44,EZR,HLA-A,RRAS
Neuregulin Signaling	1.12	0.0208	#NUM!	ITGA3,RRAS
ATM Signaling	1.11	0.0206	#NUM!	GADD45B,NFKBIA
p53 Signaling	1.1	0.0204	#NUM!	CCND2,GADD45B
Apelin Cardiomyocyte Signaling Pathway	1.09	0.0202	#NUM!	MYL12A,MYL12B
Mouse Embryonic Stem Cell Pluripotency	1.06	0.0194	#NUM!	IL6ST,RRAS
Sumoylation Pathway	1.06	0.0194	#NUM!	NFKB2,NFKBIA
Granzyme A Signaling	1.06	0.0526	#NUM!	SET
IGF-1 Signaling	1.06	0.0192	#NUM!	IGF1,RRAS
Inflammasome pathway	1.04	0.05	#NUM!	NFKB2
Antioxidant Action of Vitamin C	1.02	0.0183	#NUM!	NFKB2,NFKBIA
Glioma Signaling	1.02	0.0182	#NUM!	IGF1,RRAS
HGF Signaling	1.01	0.018	#NUM!	ITGA3,RRAS
NGF Signaling	0.991	0.0175	#NUM!	NFKB2,RRAS
Apelin Endothelial Signaling Pathway	0.983	0.0174	#NUM!	NFKB2,RRAS
Role of PKR in Interferon Induction and Antiviral Response	0.971	0.0171	#NUM!	NFKB2,NFKBIA
Renin-Angiotensin Signaling	0.967	0.0169	#NUM!	NFKB2,RRAS
Role of JAK1, JAK2 and TYK2 in Interferon Signaling	0.967	0.0417	#NUM!	NFKB2
p38 MAPK Signaling	0.967	0.0169	#NUM!	TGFB2,TGFB3
Role of NANOG in Mammalian Embryonic Stem Cell Pluripotency	0.959	0.0168	#NUM!	IL6ST,RRAS
Role of JAK family kinases in IL-6-type Cytokine Signaling	0.951	0.04	#NUM!	IL6ST
Opioid Signaling Pathway	0.947	0.0121	#NUM!	NFKB2,NFKBIA,RRAS
Inhibition of ARE-Mediated mRNA Degradation Pathway	0.943	0.0164	#NUM!	LTB,ZFP36L1
P2Y Purigenic Receptor Signaling Pathway	0.914	0.0157	#NUM!	NFKB2,RRAS
Reelin Signaling in Neurons	0.903	0.0155	#NUM!	APOE,ITGA3
Dopamine Degradation	0.876	0.0333	#NUM!	COMT
Human Embryonic Stem Cell Pluripotency	0.87	0.0148	#NUM!	TGFB2,TGFB3
Th2 Pathway	0.863	0.0147	#NUM!	HLA-A,JAG1
G-Protein Coupled Receptor Signaling	0.854	0.011	#NUM!	NFKB2,NFKBIA,RRAS
Ovarian Cancer Signaling	0.851	0.0144	#NUM!	CD44,RRAS
Protein Ubiquitination Pathway	0.851	0.011	#NUM!	BIRC3,HLA-A,PSMD11
IL-9 Signaling	0.839	0.0303	#NUM!	NFKB2
Type II Diabetes Mellitus Signaling	0.836	0.0141	#NUM!	NFKB2,NFKBIA
D-myo-inositol (1,4,5,6)-Tetrakisphosphate Biosynthesis	0.836	0.0141	#NUM!	PPP1R1B,SET
D-myo-inositol (3,4,5,6)-tetrakisphosphate Biosynthesis	0.836	0.0141	#NUM!	PPP1R1B,SET
Endocannabinoid Cancer Inhibition Pathway	0.83	0.014	#NUM!	CCND2,NUPR1
Cytotoxic T Lymphocyte-mediated Apoptosis of Target Cells	0.824	0.0294	#NUM!	HLA-A
Noradrenaline and Adrenaline Degradation	0.812	0.0286	#NUM!	COMT
Xenobiotic Metabolism Signaling	0.807	0.0105	#NUM!	CES1,NFKB2,RRAS
B Cell Development	0.801	0.0278	#NUM!	HLA-A
Interferon Signaling	0.801	0.0278	#NUM!	IFITM3
Relaxin Signaling	0.796	0.0133	#NUM!	NFKB2,NFKBIA
Factors Promoting Cardiogenesis in Vertebrates	0.796	0.0133	#NUM!	TGFB2,TGFB3
Coronavirus Pathogenesis Pathway	0.796	0.0133	#NUM!	NFKB2,NFKBIA
Sirtuin Signaling Pathway	0.793	0.0103	#NUM!	GADD45B,NFKB2,TUBA1A
Notch Signaling	0.79	0.027	#NUM!	JAG1
Complement System	0.79	0.027	#NUM!	C3
tRNA Charging	0.77	0.0256	#NUM!	AARS1
3-phosphoinositide Degradation	0.77	0.0128	#NUM!	PPP1R1B,SET
Inhibition of Matrix Metalloproteases	0.77	0.0256	#NUM!	HSPG2
Antigen Presentation Pathway	0.77	0.0256	#NUM!	HLA-A
Regulation of eIF4 and p70S6K Signaling	0.767	0.0127	#NUM!	ITGA3,RRAS
D-myo-inositol-5-phosphate Metabolism	0.767	0.0127	#NUM!	PPP1R1B,SET
Gαq Signaling	0.762	0.0127	#NUM!	NFKB2,NFKBIA
Retinol Biosynthesis	0.742	0.0238	#NUM!	CES1
Glioblastoma Multiforme Signaling	0.733	0.0121	#NUM!	IGF1,RRAS
3-phosphoinositide Biosynthesis	0.728	0.012	#NUM!	PPP1R1B,SET
Apelin Pancreas Signaling Pathway	0.724	0.0227	#NUM!	NFKB2
Th1 and Th2 Activation Pathway	0.71	0.0117	#NUM!	HLA-A,JAG1
Role of Oct4 in Mammalian Embryonic Stem Cell Pluripotency	0.706	0.0217	#NUM!	SPP1
GNRH Signaling	0.701	0.0116	#NUM!	NFKB2,RRAS
T Cell Exhaustion Signaling Pathway	0.695	0.0114	#NUM!	HLA-A,RRAS
Graft-versus-Host Disease Signaling	0.69	0.0208	#NUM!	HLA-A
Autoimmune Thyroid Disease Signaling	0.682	0.0204	#NUM!	HLA-A
Hematopoiesis from Pluripotent Stem Cells	0.682	0.0204	#NUM!	CSF1
Ephrin Receptor Signaling	0.676	0.0111	#NUM!	ITGA3,RRAS
Melanoma Signaling	0.674	0.02	#NUM!	RRAS
Myc Mediated Apoptosis Signaling	0.674	0.02	#NUM!	NFKB2
UVC-Induced MAPK Signaling	0.666	0.0196	#NUM!	RRAS
Synaptic Long Term Depression	0.646	0.0106	#NUM!	IGF1,RRAS
Transcriptional Regulatory Network in Embryonic Stem Cells	0.644	0.0185	#NUM!	SET
ERK/MAPK Signaling	0.633	0.0104	#NUM!	ITGA3,RRAS
Cancer Drug Resistance By Drug Efflux	0.616	0.0172	#NUM!	RRAS
Superpathway of Inositol Phosphate Compounds	0.613	0.0101	#NUM!	PPP1R1B,SET
IL-2 Signaling	0.599	0.0164	#NUM!	RRAS
Wnt/Ca+ pathway	0.592	0.0161	#NUM!	NFKB2
Calcium Signaling	0.592	0.00971	#NUM!	Tpm1,Tpm4
Thrombopoietin Signaling	0.587	0.0159	#NUM!	RRAS
ErbB2-ErbB3 Signaling	0.575	0.0154	#NUM!	RRAS
Calcium-induced T Lymphocyte Apoptosis	0.569	0.0152	#NUM!	HLA-A
ErbB4 Signaling	0.564	0.0149	#NUM!	RRAS
Role of JAK1 and JAK3 in γc Cytokine Signaling	0.553	0.0145	#NUM!	RRAS
GM-CSF Signaling	0.547	0.0143	#NUM!	RRAS
Growth Hormone Signaling	0.542	0.0141	#NUM!	IGF1
Heparan Sulfate Biosynthesis (Late Stages)	0.542	0.0141	#NUM!	AARS1
EIF2 Signaling	0.541	0.00893	#NUM!	ACTB,RRAS
Non-Small Cell Lung Cancer Signaling	0.532	0.0137	#NUM!	RRAS
Systemic Lupus Erythematosus Signaling	0.527	0.00873	#NUM!	HLA-A,RRAS
Hypoxia Signaling in the Cardiovascular System	0.527	0.0135	#NUM!	NFKBIA
TREM1 Signaling	0.521	0.0133	#NUM!	NFKB2
FcγRIIB Signaling in B Lymphocytes	0.521	0.0133	#NUM!	RRAS
GDNF Family Ligand-Receptor Interactions	0.517	0.0132	#NUM!	RRAS
Neurotrophin/TRK Signaling	0.517	0.0132	#NUM!	RRAS
Antiproliferative Role of Somatostatin Receptor 2	0.513	0.013	#NUM!	RRAS
Heparan Sulfate Biosynthesis	0.507	0.0128	#NUM!	AARS1
IL-3 Signaling	0.503	0.0127	#NUM!	RRAS
Role of BRCA1 in DNA Damage Response	0.499	0.0125	#NUM!	ACTB
IL-17 Signaling	0.499	0.0125	#NUM!	RRAS
FLT3 Signaling in Hematopoietic Progenitor Cells	0.499	0.0125	#NUM!	RRAS
Renal Cell Carcinoma Signaling	0.499	0.0125	#NUM!	RRAS
Role of MAPK Signaling in the Pathogenesis of Influenza	0.499	0.0125	#NUM!	RRAS
Chemokine Signaling	0.499	0.0125	#NUM!	RRAS
Prolactin Signaling	0.495	0.0123	#NUM!	RRAS
HER-2 Signaling in Breast Cancer	0.481	0.0119	#NUM!	RRAS
VEGF Family Ligand-Receptor Interactions	0.481	0.0119	#NUM!	RRAS
HIPPO signaling	0.478	0.0118	#NUM!	CD44
Xenobiotic Metabolism AHR Signaling Pathway	0.478	0.0118	#NUM!	NFKB2
Allograft Rejection Signaling	0.472	0.0116	#NUM!	HLA-A
PDGF Signaling	0.472	0.0116	#NUM!	RRAS
CTLA4 Signaling in Cytotoxic T Lymphocytes	0.461	0.0112	#NUM!	HLA-A
Th17 Activation Pathway	0.453	0.011	#NUM!	NFKB2
Melanocyte Development and Pigmentation Signaling	0.442	0.0106	#NUM!	RRAS
ErbB Signaling	0.442	0.0106	#NUM!	RRAS
α-Adrenergic Signaling	0.435	0.0104	#NUM!	RRAS
Communication between Innate and Adaptive Immune Cells	0.435	0.0104	#NUM!	HLA-A
Bladder Cancer Signaling	0.432	0.0103	#NUM!	RRAS
Salvage Pathways of Pyrimidine Ribonucleotides	0.428	0.0102	#NUM!	APOBEC3B
UVA-Induced MAPK Signaling	0.428	0.0102	#NUM!	RRAS
SAPK/JNK Signaling	0.415	0.0098	#NUM!	RRAS
Telomerase Signaling	0.398	0.00935	#NUM!	RRAS
Endocannabinoid Developing Neuron Pathway	0.375	0.0087	#NUM!	RRAS
Neuroprotective Role of THOP1 in Alzheimer's Disease	0.372	0.00862	#NUM!	HLA-A
Fc Epsilon RI Signaling	0.369	0.00855	#NUM!	RRAS
Cholecystokinin/Gastrin-mediated Signaling	0.364	0.0084	#NUM!	RRAS
Synaptogenesis Signaling Pathway	0.359	0.00641	#NUM!	APOE,RRAS
IL-15 Production	0.358	0.00826	#NUM!	NFKB2
Th1 Pathway	0.358	0.00826	#NUM!	HLA-A
G Beta Gamma Signaling	0.356	0.0082	#NUM!	RRAS
CCR3 Signaling in Eosinophils	0.35	0.00806	#NUM!	RRAS
Gαi Signaling	0.348	0.008	#NUM!	RRAS
Phagosome Formation	0.348	0.008	#NUM!	ITGA3
Synaptic Long Term Potentiation	0.337	0.00775	#NUM!	RRAS
p70S6K Signaling	0.337	0.00775	#NUM!	RRAS
Androgen Signaling	0.321	0.00735	#NUM!	NFKB2
Insulin Receptor Signaling	0.312	0.00714	#NUM!	RRAS
Cardiac β-adrenergic Signaling	0.31	0.00709	#NUM!	AKAP13
Xenobiotic Metabolism General Signaling Pathway	0.305	0.00699	#NUM!	RRAS
Corticotropin Releasing Hormone Signaling	0.301	0.0069	#NUM!	JUND
Necroptosis Signaling Pathway	0.277	0.00637	#NUM!	BIRC3
Dopamine-DARPP32 Feedback in cAMP Signaling	0.267	0.00613	#NUM!	PPP1R1B
Endothelin-1 Signaling	0.227	0.00532	#NUM!	RRAS
Xenobiotic Metabolism PXR Signaling Pathway	0.221	0.00521	#NUM!	CES1
CREB Signaling in Neurons	0.202	0.00483	#NUM!	RRAS
mTOR Signaling	0.198	0.00476	#NUM!	RRAS
Huntington's Disease Signaling	0	0.00422	#NUM!	IGF1
LPS/IL-1 Mediated Inhibition of RXR Function	0	0.00446	#NUM!	APOE
AMPK Signaling	0	0.00467	#NUM!	ACTB
cAMP-mediated signaling	0	0.00439	#NUM!	AKAP13

## Sheet: duct cluster 4-Dbmt1+Ly6d+ vs 4
© 2000-2020 QIAGEN. All rights reserved.
Ingenuity Canonical Pathways	-log(p-value)	Ratio	z-score	Molecules
Xenobiotic Metabolism Signaling	6.96	0.0418	#NUM!	CAMK2B,CES1,CYP3A7,FMO2,GAL3ST2,GSTO1,MAPK13,MGST1,SULT1C2,Sult1d1,UGT2B10,UGT2B7
Xenobiotic Metabolism PXR Signaling Pathway	6.76	0.0521	1.265	CAMK2B,CES1,CYP3A7,GAL3ST2,GSTO1,MGST1,SULT1C2,Sult1d1,UGT2B10,UGT2B7
Xenobiotic Metabolism CAR Signaling Pathway	5.81	0.0476	1.667	CYP3A7,FMO2,GAL3ST2,GSTO1,MGST1,SULT1C2,Sult1d1,UGT2B10,UGT2B7
LPS/IL-1 Mediated Inhibition of RXR Function	5.21	0.0402	#NUM!	APOE,CYP3A7,FMO2,GAL3ST2,GSTO1,MGST1,SULT1C2,Sult1d1,TNFRSF11B
Melatonin Degradation I	3.4	0.0667	2	CYP3A7,Sult1d1,UGT2B10,UGT2B7
Nicotine Degradation II	3.27	0.0615	1	CYP3A7,FMO2,UGT2B10,UGT2B7
Superpathway of Melatonin Degradation	3.27	0.0615	2	CYP3A7,Sult1d1,UGT2B10,UGT2B7
Glutathione-mediated Detoxification	3.09	0.0938	#NUM!	Gsta4,GSTO1,MGST1
Thyroid Hormone Metabolism II (via Conjugation and/or Degradation)	2.87	0.0789	#NUM!	Sult1d1,UGT2B10,UGT2B7
Calcium Transport I	2.84	0.2	#NUM!	ANXA5,ATP2A3
Xenobiotic Metabolism General Signaling Pathway	2.84	0.035	1.342	GSTO1,MAPK13,MGST1,UGT2B10,UGT2B7
Dermatan Sulfate Biosynthesis (Late Stages)	2.63	0.0652	#NUM!	GAL3ST2,SULT1C2,Sult1d1
Apelin Cardiomyocyte Signaling Pathway	2.59	0.0404	1	ATP2A3,MAPK13,MYL12B,SLC9A2
Chondroitin Sulfate Biosynthesis (Late Stages)	2.57	0.0625	#NUM!	GAL3ST2,SULT1C2,Sult1d1
Role of IL-17A in Arthritis	2.43	0.0556	#NUM!	CXCL6,MAPK13,RPS6KA1
Granulocyte Adhesion and Diapedesis	2.41	0.0278	#NUM!	CCL28,CLDN2,CXCL6,MMP7,TNFRSF11B
Chondroitin Sulfate Biosynthesis	2.38	0.0536	#NUM!	GAL3ST2,SULT1C2,Sult1d1
Nicotine Degradation III	2.36	0.0526	#NUM!	CYP3A7,UGT2B10,UGT2B7
Dermatan Sulfate Biosynthesis	2.32	0.0508	#NUM!	GAL3ST2,SULT1C2,Sult1d1
Leukocyte Extravasation Signaling	2.24	0.0254	2	CD44,CLDN2,MAPK13,MMP7,TIMP3
Sorbitol Degradation I	2.24	1	#NUM!	SORD
Serotonin Degradation	2.16	0.0448	#NUM!	Sult1d1,UGT2B10,UGT2B7
Heparan Sulfate Biosynthesis (Late Stages)	2.1	0.0423	#NUM!	GAL3ST2,SULT1C2,Sult1d1
Heparan Sulfate Biosynthesis	1.98	0.0385	#NUM!	GAL3ST2,SULT1C2,Sult1d1
Thyroid Hormone Biosynthesis	1.76	0.333	#NUM!	IYD
UVA-Induced MAPK Signaling	1.72	0.0306	#NUM!	MAPK13,RPS6KA1,SMPD3
Inhibition of Matrix Metalloproteases	1.67	0.0513	#NUM!	MMP7,TIMP3
Arsenate Detoxification I (Glutaredoxin)	1.64	0.25	#NUM!	GSTO1
Ascorbate Recycling (Cytosolic)	1.64	0.25	#NUM!	GSTO1
Estrogen Biosynthesis	1.63	0.0488	#NUM!	Akr1b7,CYP3A7
Role of IL-17F in Allergic Inflammatory Airway Diseases	1.61	0.0476	#NUM!	CXCL6,RPS6KA1
Agranulocyte Adhesion and Diapedesis	1.59	0.0207	#NUM!	CCL28,CLDN2,CXCL6,MMP7
Creatine-phosphate Biosynthesis	1.55	0.2	#NUM!	CKMT1A/CKMT1B
Role of Tissue Factor in Cancer	1.52	0.0256	#NUM!	FRK,MAPK13,RPS6KA1
Thrombin Signaling	1.49	0.0192	#NUM!	CAMK2B,GATA5,MAPK13,MYL12B
Amyloid Processing	1.47	0.04	#NUM!	BACE2,MAPK13
UVC-Induced MAPK Signaling	1.46	0.0392	#NUM!	MAPK13,SMPD3
Reelin Signaling in Neurons	1.41	0.0233	#NUM!	APOE,CAMK2B,FRK
Adipogenesis pathway	1.37	0.0224	#NUM!	KLF5,NR2F2,RPS6KA1
Sphingomyelin Metabolism	1.34	0.125	#NUM!	SMPD3
IL-17A Signaling in Airway Cells	1.28	0.0312	#NUM!	CXCL6,MAPK13
GM-CSF Signaling	1.21	0.0286	#NUM!	CAMK2B,RUNX1
Glioma Invasiveness Signaling	1.17	0.027	#NUM!	CD44,TIMP3
Role of IL-17A in Psoriasis	1.14	0.0769	#NUM!	CXCL6
FLT3 Signaling in Hematopoietic Progenitor Cells	1.11	0.025	#NUM!	MAPK13,RPS6KA1
Chemokine Signaling	1.11	0.025	#NUM!	CAMK2B,MAPK13
Apelin Adipocyte Signaling Pathway	1.09	0.0244	#NUM!	MAPK13,MGST1
Acute Phase Response Signaling	1.07	0.0168	#NUM!	CP,MAPK13,TNFRSF11B
RhoGDI Signaling	1.07	0.0167	#NUM!	CD44,MYL12B,PIP5K1B
Xenobiotic Metabolism AHR Signaling Pathway	1.06	0.0235	#NUM!	GSTO1,MGST1
Parkinson's Signaling	1.05	0.0625	#NUM!	MAPK13
Sertoli Cell-Sertoli Cell Junction Signaling	1.04	0.0162	#NUM!	CLDN2,MAPK13,PLS1
Ceramide Signaling	1.04	0.0227	#NUM!	SMPD3,TNFRSF11B
Histamine Degradation	1.03	0.0588	#NUM!	AOC1
Neuroinflammation Signaling Pathway	1.02	0.0134	#NUM!	BACE2,GABRP,MAPK13,S100B
Production of Nitric Oxide and Reactive Oxygen Species in Macrophages	1.02	0.016	#NUM!	APOE,MAPK13,TNFRSF11B
NRF2-mediated Oxidative Stress Response	1.02	0.0159	#NUM!	GSTO1,MGST1,PRDX1
Regulation of Actin-based Motility by Rho	0.991	0.0213	#NUM!	MYL12B,PIP5K1B
Methylglyoxal Degradation III	0.983	0.0526	#NUM!	Akr1b7
p53 Signaling	0.959	0.0204	#NUM!	DRAM1,SERPINB5
Mouse Embryonic Stem Cell Pluripotency	0.924	0.0194	#NUM!	ID1,MAPK13
IL-22 Signaling	0.886	0.0417	#NUM!	MAPK13
Glutathione Redox Reactions I	0.886	0.0417	#NUM!	MGST1
Vitamin-C Transport	0.886	0.0417	#NUM!	GSTO1
Antioxidant Action of Vitamin C	0.883	0.0183	#NUM!	GSTO1,MAPK13
Type I Diabetes Mellitus Signaling	0.873	0.018	#NUM!	MAPK13,TNFRSF11B
IL-17A Signaling in Gastric Cells	0.87	0.04	#NUM!	MAPK13
Role of JAK family kinases in IL-6-type Cytokine Signaling	0.87	0.04	#NUM!	MAPK13
Bupropion Degradation	0.87	0.04	#NUM!	CYP3A7
D-myo-inositol (1,4,5)-Trisphosphate Biosynthesis	0.87	0.04	#NUM!	PIP5K1B
Rac Signaling	0.866	0.0179	#NUM!	CD44,PIP5K1B
NGF Signaling	0.854	0.0175	#NUM!	RPS6KA1,SMPD3
p38 MAPK Signaling	0.83	0.0169	#NUM!	MAPK13,RPS6KA1
LXR/RXR Activation	0.812	0.0165	#NUM!	APOE,TNFRSF11B
Inhibition of ARE-Mediated mRNA Degradation Pathway	0.807	0.0164	#NUM!	MAPK13,TNFRSF11B
RhoA Signaling	0.801	0.0163	#NUM!	MYL12B,PIP5K1B
Dopamine Degradation	0.799	0.0333	#NUM!	Sult1d1
Cardiac Hypertrophy Signaling	0.793	0.0125	#NUM!	MAPK13,MYL12B,RPS6KA1
IL-6 Signaling	0.79	0.016	#NUM!	MAPK13,TNFRSF11B
FXR/RXR Activation	0.785	0.0159	#NUM!	APOE,SLC10A2
Acetone Degradation I (to Methylglyoxal)	0.785	0.0323	#NUM!	CYP3A7
4-1BB Signaling in T Lymphocytes	0.772	0.0312	#NUM!	MAPK13
Synaptic Long Term Potentiation	0.77	0.0155	#NUM!	CAMK2B,RPS6KA1
Opioid Signaling Pathway	0.767	0.0121	#NUM!	CAMK2B,FRK,RPS6KA1
Semaphorin Neuronal Repulsive Signaling Pathway	0.764	0.0154	#NUM!	CD44,MYL12B
IL-12 Signaling and Production in Macrophages	0.752	0.0152	#NUM!	APOE,MAPK13
Inhibition of Angiogenesis by TSP1	0.75	0.0294	#NUM!	MAPK13
IL-17A Signaling in Fibroblasts	0.738	0.0286	#NUM!	MAPK13
Ovarian Cancer Signaling	0.719	0.0144	#NUM!	CD44,MMP7
Type II Diabetes Mellitus Signaling	0.706	0.0141	#NUM!	SMPD3,TNFRSF11B
Aryl Hydrocarbon Receptor Signaling	0.701	0.014	#NUM!	GSTO1,MGST1
April Mediated Signaling	0.695	0.0256	#NUM!	MAPK13
Antiproliferative Role of TOB in T Cell Signaling	0.695	0.0256	#NUM!	RPS6KA1
B Cell Activating Factor Signaling	0.676	0.0244	#NUM!	MAPK13
Coronavirus Pathogenesis Pathway	0.67	0.0133	#NUM!	MAPK13,TMPRSS2
Retinol Biosynthesis	0.666	0.0238	#NUM!	CES1
Phagosome Maturation	0.666	0.0132	#NUM!	CTSE,PRDX1
Oncostatin M Signaling	0.658	0.0233	#NUM!	TIMP3
IL-23 Signaling Pathway	0.648	0.0227	#NUM!	RUNX1
iNOS Signaling	0.64	0.0222	#NUM!	MAPK13
Necroptosis Signaling Pathway	0.64	0.0127	#NUM!	CAMK2B,TNFRSF11B
Aldosterone Signaling in Epithelial Cells	0.636	0.0127	#NUM!	CRYAB,PIP5K1B
Role of Oct4 in Mammalian Embryonic Stem Cell Pluripotency	0.631	0.0217	#NUM!	NR2F2
FAT10 Cancer Signaling Pathway	0.631	0.0217	#NUM!	TNFRSF11B
HOTAIR Regulatory Pathway	0.629	0.0125	#NUM!	CD44,MMP7
Triacylglycerol Degradation	0.623	0.0213	#NUM!	CES1
HMGB1 Signaling	0.609	0.0121	#NUM!	MAPK13,TNFRSF11B
Cell Cycle: G2/M DNA Damage Checkpoint Regulation	0.607	0.0204	#NUM!	RPS6KA1
Cdc42 Signaling	0.602	0.012	#NUM!	MAPK13,MYL12B
Myc Mediated Apoptosis Signaling	0.6	0.02	#NUM!	TNFRSF11B
Tight Junction Signaling	0.599	0.0119	#NUM!	CLDN2,TNFRSF11B
UVB-Induced MAPK Signaling	0.585	0.0192	#NUM!	MAPK13
GNRH Signaling	0.58	0.0116	#NUM!	CAMK2B,MAPK13
Wnt/β-catenin Signaling	0.58	0.0116	#NUM!	CD44,MMP7
EGF Signaling	0.564	0.0182	#NUM!	MAPK13
CNTF Signaling	0.551	0.0175	#NUM!	RPS6KA1
Dendritic Cell Maturation	0.547	0.0109	#NUM!	MAPK13,TNFRSF11B
Hepatic Cholestasis	0.539	0.0108	#NUM!	SLC10A2,TNFRSF11B
Maturity Onset Diabetes of Young (MODY) Signaling	0.539	0.0169	#NUM!	APOE
B Cell Receptor Signaling	0.539	0.0108	#NUM!	CAMK2B,MAPK13
Regulation Of The Epithelial Mesenchymal Transition By Growth Factors Pathway	0.53	0.0106	#NUM!	MAPK13,TNFRSF11B
Induction of Apoptosis by HIV1	0.527	0.0164	#NUM!	TNFRSF11B
Autophagy	0.527	0.0164	#NUM!	CTSE
RAR Activation	0.511	0.0103	#NUM!	MAPK13,NR2F2
Role of PI3K/AKT Signaling in the Pathogenesis of Influenza	0.51	0.0156	#NUM!	PLAC8
Cardiac Hypertrophy Signaling (Enhanced)	0.51	0.00821	2	ATP2A3,CAMK2B,MAPK13,TNFRSF11B
PXR/RXR Activation	0.504	0.0154	#NUM!	CYP3A7
CD40 Signaling	0.504	0.0154	#NUM!	MAPK13
Calcium-induced T Lymphocyte Apoptosis	0.499	0.0152	#NUM!	ATP2A3
IL-10 Signaling	0.483	0.0145	#NUM!	MAPK13
HIF1α Signaling	0.48	0.00976	#NUM!	CAMK2B,MMP7
Calcium Signaling	0.478	0.00971	#NUM!	ATP2A3,CAMK2B
CREB Signaling in Neurons	0.475	0.00966	#NUM!	CAMK2B,RPS6KA1
Growth Hormone Signaling	0.472	0.0141	#NUM!	RPS6KA1
Melatonin Signaling	0.467	0.0139	#NUM!	CAMK2B
ERK5 Signaling	0.467	0.0139	#NUM!	RPS6KA1
Osteoarthritis Pathway	0.463	0.00948	#NUM!	ANXA5,TIMP3
T Helper Cell Differentiation	0.462	0.0137	#NUM!	TNFRSF11B
Estrogen-Dependent Breast Cancer Signaling	0.458	0.0135	#NUM!	Akr1b7
Integrin Signaling	0.458	0.00939	#NUM!	MYL12B,TSPAN1
Role of NFAT in Cardiac Hypertrophy	0.456	0.00935	#NUM!	CAMK2B,MAPK13
IL-15 Signaling	0.453	0.0133	#NUM!	MAPK13
Toll-like Receptor Signaling	0.449	0.0132	#NUM!	MAPK13
Neurotrophin/TRK Signaling	0.449	0.0132	#NUM!	RPS6KA1
Hepatic Fibrosis Signaling Pathway	0.449	0.00815	#NUM!	MAPK13,MYL12B,TNFRSF11B
Actin Cytoskeleton Signaling	0.446	0.00917	#NUM!	MYL12B,PIP5K1B
VDR/RXR Activation	0.44	0.0128	#NUM!	SERPINB1
IL-7 Signaling Pathway	0.44	0.0128	#NUM!	MAPK13
IL-17 Signaling	0.431	0.0125	#NUM!	MAPK13
Role of MAPK Signaling in the Pathogenesis of Influenza	0.431	0.0125	#NUM!	MAPK13
LPS-stimulated MAPK Signaling	0.423	0.0122	#NUM!	MAPK13
PEDF Signaling	0.423	0.0122	#NUM!	MAPK13
cAMP-mediated signaling	0.421	0.00877	#NUM!	CAMK2B,RPS6KA1
FGF Signaling	0.415	0.0119	#NUM!	MAPK13
HIPPO signaling	0.41	0.0118	#NUM!	CD44
BMP signaling pathway	0.41	0.0118	#NUM!	MAPK13
RANK Signaling in Osteoclasts	0.399	0.0114	#NUM!	MAPK13
Acute Myeloid Leukemia Signaling	0.395	0.0112	#NUM!	RUNX1
Crosstalk between Dendritic Cells and Natural Killer Cells	0.395	0.0112	#NUM!	CAMK2B
Protein Kinase A Signaling	0.393	0.00752	#NUM!	CAMK2B,MYL12B,PTPRU
Insulin Secretion Signaling Pathway	0.388	0.00823	#NUM!	CAMK2B,MAPK13
IL-1 Signaling	0.387	0.011	#NUM!	MAPK13
Th17 Activation Pathway	0.387	0.011	#NUM!	RUNX1
Signaling by Rho Family GTPases	0.386	0.0082	#NUM!	MYL12B,PIP5K1B
CCR5 Signaling in Macrophages	0.377	0.0106	#NUM!	MAPK13
Melanocyte Development and Pigmentation Signaling	0.377	0.0106	#NUM!	RPS6KA1
ErbB Signaling	0.377	0.0106	#NUM!	MAPK13
GABA Receptor Signaling	0.374	0.0105	#NUM!	GABRP
TGF-β Signaling	0.371	0.0104	#NUM!	MAPK13
ATM Signaling	0.367	0.0103	#NUM!	MAPK13
Bladder Cancer Signaling	0.367	0.0103	#NUM!	MMP7
PAK Signaling	0.367	0.0103	#NUM!	MYL12B
Nitric Oxide Signaling in the Cardiovascular System	0.361	0.0101	#NUM!	ATP2A3
Apoptosis Signaling	0.361	0.0101	#NUM!	RPS6KA1
Neuropathic Pain Signaling In Dorsal Horn Neurons	0.354	0.0099	#NUM!	CAMK2B
PPAR Signaling	0.345	0.00962	#NUM!	TNFRSF11B
IGF-1 Signaling	0.345	0.00962	#NUM!	IGFBP7
PD-1, PD-L1 cancer immunotherapy pathway	0.338	0.00943	#NUM!	TNFRSF11B
CDK5 Signaling	0.333	0.00926	#NUM!	MAPK13
Paxillin Signaling	0.333	0.00926	#NUM!	MAPK13
G-Protein Coupled Receptor Signaling	0.332	0.00735	#NUM!	CAMK2B,RPS6KA1
Glioma Signaling	0.327	0.00909	#NUM!	CAMK2B
iCOS-iCOSL Signaling in T Helper Cells	0.324	0.00901	#NUM!	CAMK2B
Endocannabinoid Developing Neuron Pathway	0.313	0.0087	#NUM!	MAPK13
Neuroprotective Role of THOP1 in Alzheimer's Disease	0.311	0.00862	#NUM!	TMPRSS2
Fc Epsilon RI Signaling	0.308	0.00855	#NUM!	MAPK13
Role of PKR in Interferon Induction and Antiviral Response	0.308	0.00855	#NUM!	MAPK13
Sphingosine-1-phosphate Signaling	0.308	0.00855	#NUM!	SMPD3
Renin-Angiotensin Signaling	0.305	0.00847	#NUM!	MAPK13
GP6 Signaling Pathway	0.303	0.0084	#NUM!	LAMB3
IL-15 Production	0.298	0.00826	#NUM!	FRK
CCR3 Signaling in Eosinophils	0.291	0.00806	#NUM!	MAPK13
14-3-3-mediated Signaling	0.283	0.00787	#NUM!	RPS6KA1
Atherosclerosis Signaling	0.283	0.00787	#NUM!	APOE
Endocannabinoid Neuronal Synapse Pathway	0.281	0.00781	#NUM!	MAPK13
White Adipose Tissue Browning Pathway	0.279	0.00775	#NUM!	MAPK13
Gα12/13 Signaling	0.277	0.00769	#NUM!	MYL12B
Axonal Guidance Signaling	0.276	0.0062	#NUM!	ADAM33,MMP7,MYL12B
Cellular Effects of Sildenafil (Viagra)	0.274	0.00763	#NUM!	MYL12B
Role of Macrophages, Fibroblasts and Endothelial Cells in Rheumatoid Arthritis	0.268	0.00641	#NUM!	CAMK2B,TNFRSF11B
Synaptogenesis Signaling Pathway	0.268	0.00641	#NUM!	APOE,CAMK2B
Human Embryonic Stem Cell Pluripotency	0.265	0.00741	#NUM!	LEFTY1
STAT3 Pathway	0.265	0.00741	#NUM!	MAPK13
Iron homeostasis signaling pathway	0.261	0.0073	#NUM!	CP
PI3K Signaling in B Lymphocytes	0.259	0.00725	#NUM!	CAMK2B
Cardiac β-adrenergic Signaling	0.253	0.00709	#NUM!	ATP2A3
Endocannabinoid Cancer Inhibition Pathway	0.249	0.00699	#NUM!	SMPD3
Estrogen Receptor Signaling	0.247	0.0061	#NUM!	MMP7,MYL12B
Corticotropin Releasing Hormone Signaling	0.245	0.0069	#NUM!	MAPK13
Glucocorticoid Receptor Signaling	0.237	0.00595	#NUM!	ANXA1,MAPK13
Factors Promoting Cardiogenesis in Vertebrates	0.236	0.00667	#NUM!	CAMK2B
PKCθ Signaling in T Lymphocytes	0.227	0.00645	#NUM!	CAMK2B
Regulation of eIF4 and p70S6K Signaling	0.223	0.00637	#NUM!	MAPK13
Dopamine-DARPP32 Feedback in cAMP Signaling	0.214	0.00613	#NUM!	ATP2A3
Tec Kinase Signaling	0.212	0.0061	#NUM!	FRK
3-phosphoinositide Biosynthesis	0.209	0.00602	#NUM!	PIP5K1B
CXCR4 Signaling	0.208	0.00599	#NUM!	MYL12B
Mitochondrial Dysfunction	0.201	0.00585	#NUM!	BACE2
Germ Cell-Sertoli Cell Junction Signaling	0.201	0.00585	#NUM!	PLS1
Natural Killer Cell Signaling	0	0.00508	#NUM!	MAPK13
Hepatic Fibrosis / Hepatic Stellate Cell Activation	0	0.00538	#NUM!	TNFRSF11B
Clathrin-mediated Endocytosis Signaling	0	0.00518	#NUM!	APOE
IL-8 Signaling	0	0.005	#NUM!	MYL12B
Endothelin-1 Signaling	0	0.00532	#NUM!	MAPK13
Molecular Mechanisms of Cancer	0	0.00512	#NUM!	CAMK2B,MAPK13
Colorectal Cancer Metastasis Signaling	0	0.00395	#NUM!	MMP7
mTOR Signaling	0	0.00476	#NUM!	RPS6KA1
AMPK Signaling	0	0.00467	#NUM!	MAPK13
Role of Osteoblasts, Osteoclasts and Chondrocytes in Rheumatoid Arthritis	0	0.00455	#NUM!	TNFRSF11B
Phospholipase C Signaling	0	0.00389	#NUM!	MYL12B
Breast Cancer Regulation by Stathmin1	0	0.00338	#NUM!	ADGRG7,CAMK2B
Superpathway of Inositol Phosphate Compounds	0	0.00503	#NUM!	PIP5K1B
Sperm Motility	0	0.00448	#NUM!	FRK
ERK/MAPK Signaling	0	0.00518	#NUM!	RPS6KA1
Protein Ubiquitination Pathway	0	0.00366	#NUM!	CRYAB
NF-κB Signaling	0	0.00559	#NUM!	TNFRSF11B
Adrenomedullin signaling pathway	0	0.00508	#NUM!	MAPK13
Systemic Lupus Erythematosus In T Cell Signaling Pathway	0	0.00299	#NUM!	CD44
