# Supplementary material for: Single-cell transcriptome analysis defines heterogeneity of the murine pancreatic ductal tree
Source: eLife. 2021 May 19;10:e67776. doi: 10.7554/eLife.67776 (PMC8184217; doi:10.7554/eLife.67776)
Supplement: Figure 3—source data 3. [file elife-67776-fig3-data3.xls]

## Sheet: DBA+ duct cluster 0 vs 2
© 2000-2020 QIAGEN. All rights reserved.
Upstream Regulator	Expr Log Ratio	Molecule Type	Predicted Activation State	Activation z-score	Flags	p-value of overlap	Target Molecules in Dataset	Mechanistic Network
lysophosphatidic acid		chemical - other				0.0398	CCND1
prostaglandin J2		chemical - endogenous mammalian				0.0133	CCND1
CGP 74514A		chemical - kinase inhibitor				0.00162	CCND1
L-serine		chemical - endogenous mammalian				0.00445	CCND1
glutamine		chemical - endogenous mammalian				0.0418	CCND1
prostaglandin D2		chemical - endogenous mammalian				0.0121	CCND1
pirinixic acid		chemical toxicant				0.0132	CCND1,IFITM3
dinoprost		chemical - endogenous mammalian				0.0308	CCND1
5'-methylthioadenosine		chemical - endogenous mammalian				0.00567	CCND1
prostaglandin A2		chemical - endogenous non-mammalian				0.00647	CCND1
N(6)-(3-iodobenzyl)-5'-N-methylcarboxamidoadenosine		chemical drug				0.00728	CCND1
lipoxin A4		chemical - endogenous mammalian				9.67e-05	CCND1,CFTR
inosine		chemical - endogenous mammalian				0.000192	IFITM3,TUBA1A
L-proline		chemical - endogenous mammalian				0.00284	CCND1
roscovitine		chemical drug				0.0189	CCND1
glycine		chemical - endogenous mammalian				0.00728	CCND1
L-glutamic acid		chemical - endogenous mammalian				0.0449	CCND1
PD173074		chemical reagent				0.0316	CCND1
L-threonine		chemical - endogenous mammalian				0.00405	CCND1
L-aspartic acid		chemical - endogenous mammalian				0.00203	CCND1
E. coli B5 lipopolysaccharide		chemical - endogenous non-mammalian				0.000128	CCND1,HLA-A,TGFB2
E. coli B4 lipopolysaccharide		chemical toxicant				0.00554	HLA-A,IFITM3
hyaluronic acid		chemical - endogenous mammalian				0.0453	TGFB2
dextran sulfate		chemical drug				0.000165	CCND1,IFITM3,TGFB2
isopropyl thiogalactoside		chemical reagent				0.000811	CCND1
p38 Sapk		group				0.00203	CCND1
dehydroepiandrosterone sulfate		chemical - endogenous mammalian				0.00526	CCND1
inecalcitol		chemical drug				0.00162	CCND1
fulvestrant		chemical drug				0.00524	CCND1,TGFB2
beta-estradiol		chemical - endogenous mammalian		0.709	bias	0.000808	CCND1,CFTR,HLA-A,SPARC,TGFB2
deoxycholate		chemical - endogenous mammalian				0.0205	CCND1
TEAD		group				0.00405	CCND1
8-bromo-cAMP		chemical reagent				0.00242	CCND1,TGFB2
bucladesine		chemical toxicant				0.00853	CCND1,TGFB2
corticosterone		chemical - endogenous mammalian				0.05	CCND1
L-alanine		chemical - endogenous mammalian				0.00162	CCND1
heparin		chemical - endogenous mammalian				0.0292	CCND1
pregna-4,17-diene-3,16-dione		chemical - endogenous non-mammalian				0.00929	CCND1
ILX-23-7553		chemical drug				0.00203	CCND1
hydrogen peroxide		chemical - endogenous mammalian				0.0172	CCND1,SPARC
lysophosphatidylinositol		chemical - endogenous mammalian				0.0193	CFTR
ursodeoxycholic acid		chemical - endogenous mammalian				0.0003	SPARC,TGFB2
N-Cadherin		group				0.00324	CCND1
alvespimycin		chemical drug				0.00929	CCND1
lonafarnib		chemical drug				0.00607	CCND1
1-palmitoyl-2-arachidonoyl-phosphatidylcholine		chemical - endogenous mammalian				0.00122	CCND1
ATP		chemical - endogenous mammalian				0.0449	CCND1
dexamethasone		chemical drug		-0.665		6.39e-05	CCND1,HLA-A,IFITM3,SPARC,TGFB2,Wfdc18
CERT1		kinase				0.000811	CCND1
ESRRG		ligand-dependent nuclear receptor				0.0288	KCNE3
trastuzumab		biologic drug				0.00768	CCND1
rhodamine 6G		chemical toxicant				0.00324	CCND1
Cobra Venom Factor		chemical - endogenous non-mammalian				0.00243	TGFB2
alpha-amanitin		chemical toxicant				0.00728	CCND1
zerumbone		chemical - endogenous non-mammalian				0.0097	CCND1
GON4L		transcription regulator				0.00567	CCND1
embelin		chemical - endogenous non-mammalian				0.00486	CCND1
picropodophyllin		chemical drug				0.00647	IFITM3
trichloroethylene		chemical toxicant				0.0233	SPARC
lonaprisan		chemical drug				0.000811	CCND1
RNY3		other				0.0109	IFITM3
plumbagin		chemical toxicant				0.0101	CCND1
CDK4/6		group				0.0284	CCND1
JAK		group				0.0173	IFITM3
Creb		group				0.00728	CCND1,TGFB2
Tgf beta		group				0.00592	CCND1,SPARC
ERK1/2		group				0.00648	CCND1,HLA-A
Hsp27		group				0.0189	CCND1
Gsk3		group				0.032	CCND1
STAT5a/b		group				0.05	CCND1
Ras homolog		group				0.00849	CCND1
p70 S6k		group				0.0109	CCND1
Calcineurin A		group				0.0137	CCND1
Rb		group				0.0324	CCND1
IFN alpha/beta		group				0.0324	HLA-A
MAP2K1/2		group				0.0316	CCND1
calpain		complex				0.0101	CCND1
NFkB (family)		group				0.00688	CCND1
myosin-light-chain kinase		group				0.00122	CCND1
caspase		group				0.0125	CCND1
FKHR		group				0.00122	CCND1
Ikb		group				0.0097	CCND1
Aldose Reductase		group				0.00849	CCND1
Histone h3		group				0.0151	CCND1,IFITM3
Rock		group				0.0213	CCND1
Fgf		group				0.0133	CCND1
Rac		group				0.00567	CCND1
Gli		group				0.00728	CCND1
Mapk		group				0.043	CCND1
Ciap		group				0.0097	CCND1
N-cor		group				0.0406	CCND1
IKK (complex)		complex				0.00889	CCND1
Pdgf (complex)		complex				0.000709	CCND1,SPARC
Stat5 dimer		complex				0.00647	CCND1
NfkB1-RelA		complex				0.0105	CCND1
Pdgf Ab		complex				0.00728	CCND1
Ap1		complex				0.00191	CCND1,SPARC
Integrin		complex				1.98e-05	CCND1,TGFB2
Bcl9-Cbp/p300-Ctnnb1-Lef/Tcf		complex				0.00365	CCND1
dihydroartemisinin		chemical drug				0.00567	CCND1
1'-acetoxychavicol acetate		chemical reagent				0.00607	CCND1
maslinic acid		chemical - endogenous non-mammalian				0.0344	CCND1
3M-002		chemical reagent				0.0492	CCND1
oleanolic acid		chemical - endogenous non-mammalian				0.0137	CCND1
crizotinib		chemical drug				0.0113	SPARC
grape seed extract		chemical drug				0.0129	CCND1
BMS-387032		chemical drug				0.00365	CCND1
Ho		group				0.00203	SPARC
NFkB (complex)		complex				0.0018	CCND1,CFTR,HLA-A
Ifn gamma		complex				0.0395	TGFB2
collagen type i (family)		group				0.0113	SPARC
nitrosomethylurethane		chemical reagent				0.000811	CCND1
vanillyl-N-nonylamide		chemical drug				0.00243	CCND1
VitaminD3-VDR-RXR		complex				0.0185	TGFB2
Nfat (family)		group				0.000752	CCND1,TGFB2
salinosporamide A		chemical drug				0.00849	CCND1
BMS-690514		chemical drug				0.0133	CCND1
PSMB11		peptidase				0.000904	CCND1,TGFB2
DBH-AS1		other				0.00243	CCND1
UCA1		other				0.00324	CCND1
LINC00461		other				0.00324	CCND1
Interferon alpha		group				0.000661	CCND1,HLA-A,IFITM3
ERK		group				0.00422	CCND1,TUBA1A
Raf		group				0.0276	CCND1
Retinoic acid-RAR-RXR		complex				0.00324	TGFB2
1,3-bis(4-hydroxyphenyl)-4-methyl-5-[4-(2-piperidinylethoxy)phenol]-1H-pyrazole		chemical reagent				0.00324	CCND1
KDM3A		transcription regulator				0.0149	CCND1
VTCN1		other				0.00324	CCND1
CAMK2N2		other				0.00405	CCND1
selumetinib		chemical drug				0.00768	CCND1
HES3		transcription regulator				0.0173	TUBA1A
FSH		complex				0.000464	CCND1,TGFB2,TUBA1A
NSD3		enzyme				0.00122	CCND1
RNF187		enzyme				0.00203	CCND1
DGCR8		enzyme				0.0205	CCND1
Jun-ATF2		complex				0.00122	CCND1
Fc gamma receptor		group				0.0129	CCND1
NCK		group				0.000406	CCND1
Tlr		group				0.0465	HLA-A
CINP		other				0.00162	CCND1
ATP8B1		transporter				0.00162	CFTR
BDNF		growth factor				0.00737	SPARC,TUBA1A
ISX		transcription regulator				0.00284	CCND1
FBXO31		enzyme				0.000406	CCND1
EIF4A3		enzyme				0.00243	CCND1
THRAP3		transcription regulator				0.00607	CCND1
VIPAS39		other				0.00243	SPARC
BSCL2		other				0.0261	CCND1
NPC1		transporter				0.0344	CCND1
PDLIM2		other				0.0375	CCND1
OGA		enzyme				0.0118	CCND1,TUBA1A
SAV1		other				0.00809	CCND1
LIN28A		other				0.0109	CCND1
MRTFB		transcription regulator				0.002	HLA-A,TGFB2
PAF1		other				0.0197	IFITM3
KLF8		transcription regulator				0.00203	CCND1
SULF2		enzyme				0.00768	CCND1
ZNF652		other				0.00284	TGFB2
DNAJB4		other				0.00162	CCND1
NIBAN2		transcription regulator				0.00122	CCND1
TET2		enzyme				0.00136	IFITM3,KCNE3
elocalcitol		chemical drug				0.00203	TGFB2
NOP58		enzyme				0.00122	CCND1
AKIRIN2		other				0.00284	CCND1
C1orf61		other				0.00284	CCND1
KCNJ12		ion channel				0.000406	CCND1
Hmgb1		transcription regulator				0.00849	CCND1
CALCOCO1		transcription regulator				0.000406	CCND1
URGCP		other				0.000406	CCND1
ANKHD1/ANKHD1-EIF4EBP3		other				0.00243	CCND1
SNORD21		other				0.000406	HLA-A
BTNL2		transmembrane receptor				0.03	IFITM3
RNASEH2A		enzyme				0.0165	IFITM3
SOX17		transcription regulator				8.15e-05	CCND1,SPARC
RNF31		enzyme				0.0296	CCND1
MIR17HG		other				0.0496	CCND1
PI-103		chemical - kinase inhibitor				0.00728	CCND1
NQO2		enzyme				0.00405	CCND1
REM2		enzyme				0.000811	CCND1
RPRD1B		other				0.000811	CCND1
GPC6		transmembrane receptor				0.00122	CCND1
TRPS1		transcription regulator				0.0201	TGFB2
MEMO1		other				0.00365	CCND1
NDUFAF3		other				0.00122	CCND1
LLGL2		other				0.0121	TGFB2
ATE1		enzyme				0.00284	CCND1
CCDC88C		other				0.000811	CCND1
ZMIZ2		transcription regulator				0.00203	CCND1
E2F8		transcription regulator				0.00486	CCND1
S100A12		other				0.00486	CCND1
PSMD14		peptidase				0.00122	CCND1
OSI-027		chemical drug				0.000811	CCND1
RRP1B		transcription regulator				0.0438	CCND1
SOX11		transcription regulator				0.00138	CCND1,TUBA1A
TEX11		other				0.00162	CCND1
Crnde		other				0.00243	CCND1
CCDC62		transcription regulator				0.000406	CCND1
Laminin (complex)		complex				0.000131	CCND1,TGFB2
TCF/LEF		group				0.00567	CCND1
CRTC2		other				0.0117	CCND1
PLCL2		enzyme				0.00445	SPARC
Slfn1		enzyme				0.00162	CCND1
KLHL2		other				0.00122	CCND1
DAZ2		translation regulator				0.00405	IFITM3
VENTX		transcription regulator				0.000811	CCND1
ORAI3		other				0.00162	CCND1
CDH16		enzyme				0.00203	CCND1
BPIFB1		other				0.00243	CCND1
MEX3A		other				3.56e-07	CCND1,KCNE3,TUBA1A
CDC73		other				0.0105	CCND1
NSUN6		enzyme				0.0157	TGFB2
NR2E1		ligand-dependent nuclear receptor				6.76e-05	CCND1,TGFB2
MUCL1		other				0.00162	CCND1
FAM3B		cytokine				0.00929	SPARC
PLAC1		other				0.000406	CCND1
MAVS		other				0.028	IFITM3
GLIS2		transcription regulator				2.23e-05	CCND1,SPARC
TMEM8B		other				0.00647	CCND1
SLC39A4		transporter				0.00162	CCND1
TEAD1		transcription regulator				0.028	CCND1
OLA1		enzyme				0.00122	CCND1
TMEM173		other				0.0245	IFITM3
SNHG20		other				0.00445	CCND1
OIP5-AS1		other				0.00445	CCND1
DACT3		other				0.00162	CCND1
LTBP4		growth factor				0.00324	TGFB2
Raet1a		other				0.000811	HLA-A
GPBAR1		G-protein coupled receptor				0.00526	CCND1
Hedgehog		group				0.0201	CCND1
ETS-ELK1		complex				0.000811	CCND1
CTNNβ-LEF1		complex				0.000811	CCND1
Growth hormone		group				0.00377	CCND1,TUBA1A
Ifn		group				0.00104	HLA-A,IFITM3
2,3-bis(3'-hydroxybenzyl)butane-1,4-diol		chemical - endogenous mammalian				0.00203	SPARC
48s		complex				0.00607	CCND1
MTORC1		complex				0.0213	CCND1
Ifnar		group				0.000627	HLA-A,IFITM3
UBE2D3		enzyme				0.00122	CCND1
estrogen receptor		group				0.000101	CCND1,SPARC,TGFB2
CG		complex				0.009	HLA-A,TGFB2
Collagen type I (complex)		complex				0.0273	CCND1
Lh		complex				0.00435	TGFB2,TUBA1A
Nkx2-2os		other				0.00647	CCND1
HMGA1		transcription regulator				0.00156	CCND1,SPARC
MEN1		transcription regulator				0.0189	CCND1
EIF2AK3		kinase				0.0434	CCND1
IDH2		enzyme				0.00567	TGFB2
ABCB4		transporter				8.15e-05	SPARC,TGFB2
INPP5D		phosphatase				0.0157	CCND1
PRKDC		kinase				0.0113	CCND1
NAE1		enzyme				0.00567	CCND1
CSNK2B		kinase				0.00526	CCND1
xanthohumol		chemical drug				0.0149	CCND1
PECAM1		other				0.00567	CCND1
Integrin alpha 5 beta 1		complex				0.000406	CCND1
Cathepsin		group				0.00203	CCND1
Nc2		complex				0.00162	HLA-A
Mapk kinase		group				0.000406	CCND1
IGFBP7		transporter				0.00607	CCND1
SRA1		transcription regulator				0.00849	TGFB2
RBM5		other				0.0181	IFITM3
MAPK8IP1		other				0.00889	CCND1
SKP2		other				0.0141	CCND1
GRP		growth factor				0.0117	CCND1
PPP1R1B		phosphatase				0.00688	CCND1
torin1		chemical reagent				0.0402	CCND1
SHH		peptidase				0.00227	CCND1,TGFB2
STAT3		transcription regulator				0.00159	CCND1,HLA-A,IFITM3
EIF3I		translation regulator				0.00162	CCND1
SLC9A3R1		other				0.00889	CFTR
GAB2		other				0.0137	SPARC
MAP2K4		kinase				0.0233	CCND1
TEAD4		transcription regulator				0.0395	CCND1
Cyp2c23		enzyme				0.00688	TGFB2
baicalin		chemical - endogenous non-mammalian				0.0197	SPARC
RNMT		enzyme				0.000811	CCND1
Ins1		other				0.000217	CCND1,SPARC,Wfdc18
AREG		growth factor				0.0351	CCND1
JMJD6		transmembrane receptor				0.00405	CCND1
ARHGEF1		other				0.00324	CCND1
NCOR2		transcription regulator				0.0229	CCND1
PRKCE		kinase				0.0312	CCND1
SRGAP1		other				0.00122	CCND1
MK2206		chemical drug				0.00567	CCND1
MCF2L		other				0.000811	CCND1
TACSTD2		other				0.00324	CCND1
Ap1 gamma		group				0.00122	HLA-A
EIF4H		translation regulator				0.000811	CCND1
Raet1b		other				0.00122	HLA-A
STAT1		transcription regulator				0.00914	CCND1,IFITM3
STAP2		other				0.00809	CCND1
KL		enzyme				0.0173	CCND1
IGF1		growth factor				0.0155	CCND1,IFITM3
SERTAD1		transcription regulator				0.00122	CCND1
AP1M1		transporter				0.000811	HLA-A
Tenascin		group				0.000406	CCND1
Betacatenin/TCF		complex				0.00607	CCND1
PXN		other				0.00243	CCND1
cercosporin		chemical - endogenous non-mammalian				0.00405	CCND1
GPC3		other				0.00122	CCND1
PPM1D		phosphatase				0.00405	CCND1
evofosfamide		chemical drug				0.00324	CCND1
SOX2		transcription regulator				0.0149	CCND1,TGFB2
FGFR4		kinase				0.0125	CCND1
PTEN		phosphatase				0.0313	CCND1,Wfdc18
THPO		cytokine				0.0233	CCND1
VHL		transcription regulator				1.92e-05	CCND1,IFITM3,SPARC
HTATIP2		transcription regulator				3.68e-05	CCND1,SPARC
NCOR1		transcription regulator				0.0387	CCND1
BAK1		other				0.0121	HLA-A
VIP		other				0.000827	CCND1,CFTR
TAP1		transporter				0.00607	HLA-A
CSF1		cytokine				0.00012	CCND1,HLA-A,SPARC
ACTL6A		other				0.0117	CCND1
PROCR		other				0.0109	CCND1
TLCD3A		other				0.00162	CCND1
CFB		peptidase				0.0129	TGFB2
GMNN		transcription regulator				0.0332	TGFB2
ZFHX3		transcription regulator				3.14e-08	CCND1,HLA-A,IFITM3,TUBA1A
MRTFA		transcription regulator				0.00232	HLA-A,TGFB2
PLSCR1		enzyme				0.00243	CCND1
RUNX3		transcription regulator				0.00112	CCND1,TGFB2
GHRH		other				0.0101	CCND1
NTF4		growth factor				1.75e-05	SPARC,TUBA1A
REL		transcription regulator				0.00393	CCND1,HLA-A
C1QBP		transcription regulator				0.00647	CCND1
RAP1GAP		other				0.00284	CCND1
RRAD		enzyme				0.000811	CCND1
PRL		cytokine				0.000163	CCND1,SPARC,Wfdc18
AKAP12		transporter				0.00365	CCND1
EIF4EBP1		translation regulator				0.0137	CCND1
TNFSF12		cytokine				0.0426	CCND1
PLCG1		enzyme				0.00607	CCND1
NR4A3		ligand-dependent nuclear receptor				0.0257	CCND1
MIA		other				0.00324	SPARC
MDM2		transcription regulator				0.0312	CCND1
WNT1		cytokine				0.00123	CCND1,Wfdc18
ITGA5		transmembrane receptor				0.0197	CCND1
F2R		G-protein coupled receptor				0.000752	CCND1,TGFB2
MST1		growth factor				0.0105	CCND1
RBL1		transcription regulator				0.0308	CCND1
CCN4		other				0.00284	CCND1
ERAP1		peptidase				0.00243	HLA-A
NAMPT		cytokine				0.0177	TGFB2
AGT		growth factor				0.0151	CCND1,TGFB2
CDC25B		phosphatase				0.00162	CCND1
A2M		transporter				0.0181	CCND1
MKNK1		kinase				0.0402	SPARC
BAD		other				0.00243	CCND1
JAK1		kinase				0.028	HLA-A
ADRA2B		G-protein coupled receptor				0.00162	CCND1
INHBB		growth factor				0.0105	Wfdc18
PTPRF		phosphatase				0.000811	CCND1
MAT2B		enzyme				0.00122	CCND1
POLR2A		enzyme				0.0269	CCND1
ZIC1		transcription regulator				0.00203	CCND1
DAPK3		kinase				0.000811	CCND1
MCL1		transporter				0.00445	CCND1
CIITA		transcription regulator				0.000113	CCND1,HLA-A
PPP2CA		phosphatase				0.0181	CCND1
NOTCH1		transcription regulator				0.00491	CCND1,TGFB2
IKBKE		kinase				0.00055	CCND1,HLA-A
KLF9		transcription regulator				0.00647	CCND1
H2AZ1		other				0.0125	CCND1
CELA1		peptidase				0.000811	HLA-A
LRP6		transmembrane receptor				0.0189	CCND1
TFDP1		transcription regulator				0.0145	CCND1
BANP		other				0.00365	CCND1
IHH		enzyme				0.0129	CCND1
NODAL		growth factor				0.0101	CCND1
PSMB9		peptidase				0.00365	HLA-A
CYP1A2		enzyme				0.0185	CCND1
CTNNBIP1		other				0.00486	CCND1
TAF4		transcription regulator				0.0379	CCND1
ALDH1A2		enzyme				0.0129	SPARC
GPER1		G-protein coupled receptor				0.0233	CCND1
HMOX1		enzyme				1.5e-05	CCND1,SPARC,TGFB2
GLI3		transcription regulator				0.0284	CCND1
HIF1A		transcription regulator				0.0124	CCND1,TGFB2
NDUFA13		enzyme				0.00567	CCND1
SPZ1		transcription regulator				0.00849	CCND1
IL24		cytokine				0.0197	CCND1
STC1		kinase				0.00324	TGFB2
RAC3		enzyme				0.000811	CCND1
TF		transporter				0.00929	CCND1
IKBKB		kinase				0.00573	CCND1,HLA-A
MSX2		transcription regulator				9.67e-05	CCND1,TGFB2
ID1		transcription regulator				0.0284	CCND1
CEBPA		transcription regulator				0.0136	CCND1,TGFB2
IDH1		enzyme				0.0209	TGFB2
POU2F1		transcription regulator				0.048	CCND1
CDH2		other				0.00607	CCND1
ALOX5		enzyme				0.0149	CCND1
SFRP1		transmembrane receptor				0.000199	CCND1,TGFB2
TSH		complex				0.0265	CCND1
CBR3-AS1		other				0.00284	CCND1
C3AR1		G-protein coupled receptor				0.0189	TGFB2
FZD7		G-protein coupled receptor				0.00203	CCND1
ADAM10		peptidase				0.0367	CCND1
EN1		transcription regulator				0.00526	CCND1
COL18A1		other				0.000562	CCND1,TUBA1A
IRF2		transcription regulator				0.00116	CCND1,CFTR
ADAM17		peptidase				0.0288	CCND1
IL10RA		transmembrane receptor		0.762		4.57e-06	CFTR,HLA-A,KCNE3,SPARC
FN1		enzyme				0.00313	CCND1,SPARC
CCKBR		G-protein coupled receptor				0.00768	SPARC
ZIC2		transcription regulator				0.00365	CCND1
EDN3		other				0.00849	CCND1
TSC22D3		transcription regulator				0.0205	CCND1
AGAP2		enzyme				0.00122	CCND1
SUMO1		enzyme				0.0125	CCND1
PTP4A1		phosphatase				0.0473	SPARC
PRKG1		kinase				0.0129	CCND1
S100a7a		other				0.00324	CCND1
LIMS1		other				0.00365	TGFB2
U2AF2		other				0.00122	CCND1
TARDBP		transcription regulator				0.0153	CFTR
GNAS		enzyme				0.0229	SPARC
IL3		cytokine				0.000285	CCND1,HLA-A,Wfdc18
EGLN1		enzyme				0.0265	TGFB2
CD24		other				0.043	CFTR
MAPT		other				0.00987	CCND1,TUBA1A
CIC		transcription regulator				0.00486	CCND1
RASSF1		other				0.0359	CCND1
SLPI		other				0.0101	CCND1
ELAVL1		other				0.00293	HLA-A,IFITM3
BCL2L11		other				0.0101	CCND1
ARHGAP31		other				7.67e-05	SPARC,TGFB2
H1-2		other				0.00647	CCND1
VEGFA		growth factor				0.00628	CCND1,SPARC
ADCY2		enzyme				0.000406	CCND1
MMP9		peptidase				0.0316	CCND1
WNT5A		cytokine				0.00119	CCND1,SPARC
UBA1		enzyme				0.00526	CCND1
CHUK		kinase				0.00316	CCND1,HLA-A
SP1		transcription regulator		1.964	bias	4.97e-05	CCND1,IFITM3,SPARC,TGFB2
EIF3E		other				0.0161	CCND1
PTK2		kinase				0.0233	CCND1
LEP		growth factor				0.0145	CCND1,SPARC
FOXP3		transcription regulator				0.0418	HLA-A
CXCR1		G-protein coupled receptor				0.00324	CCND1
FLI1		transcription regulator				0.0249	CCND1
MAP3K3		kinase				0.0097	TGFB2
NGFR		transmembrane receptor				0.0125	CCND1
CTBP2		transcription regulator				0.00768	CCND1
CCL2		cytokine				0.0363	CCND1
MCF2		other				0.00203	CCND1
SSB		enzyme				0.0347	CCND1
GDF15		growth factor				0.00809	CCND1
PTPN2		phosphatase				0.00768	CCND1
TFRC		transporter				0.0347	TGFB2
BCAP31		transporter				0.0109	CFTR
DAB2		other				0.00284	CCND1
PHIP		other				0.00122	CCND1
SPI1		transcription regulator				0.00491	CCND1,IFITM3
DYRK1B		kinase				0.00445	CCND1
ROCK1		kinase				5.9e-05	CCND1,TGFB2
PRKCA		kinase				0.00107	CCND1,TGFB2
PRKCI		kinase				0.0121	CCND1
SLC7A11-AS1		other				0.00243	CCND1
APBB1		transcription regulator				0.00607	CCND1
mir-155		microRNA				0.0473	CCND1
miR-338-3p (miRNAs w/seed CCAGCAU)		mature microRNA				0.0137	SPARC
miR-291a-3p (and other miRNAs w/seed AAGUGCU)		mature microRNA				0.0363	CCND1
miR-17-5p (and other miRNAs w/seed AAAGUGC)		mature microRNA				0.0257	CCND1
miR-100-5p (and other miRNAs w/seed ACCCGUA)		mature microRNA				0.00647	CCND1
mir-15		microRNA				0.0273	CCND1
miR-296-5p (miRNAs w/seed GGGCCCC)		mature microRNA				0.00809	CCND1
mir-637		microRNA				0.00243	CCND1
miR-29b-3p (and other miRNAs w/seed AGCACCA)		mature microRNA				0.00055	CCND1,SPARC
mir-29		microRNA				0.0351	CCND1
miR-18a-5p (and other miRNAs w/seed AAGGUGC)		mature microRNA				0.00929	CCND1
mir-17		microRNA				0.0324	CCND1
mir-34		microRNA				0.0292	CCND1
miR-19b-3p (and other miRNAs w/seed GUGCAAA)		mature microRNA				0.00607	CCND1
miR-141-3p (and other miRNAs w/seed AACACUG)		mature microRNA				0.03	TGFB2
miR-451a (and other miRNAs w/seed AACCGUU)		mature microRNA				0.00486	CCND1
miR-30a-3p (and other miRNAs w/seed UUUCAGU)		mature microRNA				0.00929	TUBA1A
miR-335-3p (miRNAs w/seed UUUUCAU)		mature microRNA				0.0113	SPARC
miR-193a-3p (and other miRNAs w/seed ACUGGCC)		mature microRNA				0.00445	CCND1
miR-204-5p (and other miRNAs w/seed UCCCUUU)		mature microRNA				0.0249	SPARC
miR-21-5p (and other miRNAs w/seed AGCUUAU)		mature microRNA				0.0273	TGFB2
miR-503-5p (miRNAs w/seed AGCAGCG)		mature microRNA				0.00768	CCND1
mir-497		microRNA				0.00122	CCND1
mir-8		microRNA				0.00258	CCND1,TGFB2
miR-92a-3p (and other miRNAs w/seed AUUGCAC)		mature microRNA				0.0129	CCND1
let-7a-5p (and other miRNAs w/seed GAGGUAG)		mature microRNA				0.00237	CCND1,SPARC
MED15		transcription regulator				0.00365	CCND1
H60a		other				0.00122	HLA-A
AKT1		kinase				0.00608	CCND1,TGFB2
PIK3CA		kinase				0.000379	CCND1,SPARC
SOX6		transcription regulator				0.0101	CCND1
PLK1		kinase				0.0205	TGFB2
AGER		transmembrane receptor				0.0292	CCND1
GHRHR		G-protein coupled receptor				0.00567	CCND1
TGFA		growth factor				0.0328	CCND1
ADCYAP1		other				0.00389	SPARC,TGFB2
mir-154		microRNA				0.00728	CCND1
BGN		other				0.0109	CCND1
DKK2		other				0.00324	CCND1
DICER1		enzyme				0.00608	CCND1,SPARC
PDE3A		enzyme				0.00284	CCND1
NMNAT1		enzyme				0.00405	TGFB2
NOTCH3		transcription regulator				0.0241	SPARC
GJA1		transporter				0.0133	CCND1
JUN		transcription regulator				0.016	CCND1,SPARC
MACROH2A1		other				0.0328	SPARC
CREB1		transcription regulator				0.0213	CCND1,HLA-A
HOXB9		transcription regulator				0.00728	TGFB2
BTRC		enzyme				0.0097	CCND1
PRKCZ		kinase				0.0129	CCND1
SNIP1		other				0.00243	CCND1
BMP4		growth factor				0.00313	CCND1,SPARC
HBP1		transcription regulator				0.00526	CCND1
PRKCG		kinase				0.00365	CCND1
SFRP4		transmembrane receptor				0.00647	CCND1
TWIST2		transcription regulator				0.0153	CCND1
FGF1		growth factor				0.00112	CCND1,TGFB2
NQO1		enzyme				0.0153	CCND1
CEBPB		transcription regulator		1.274	bias	3.09e-07	CCND1,CFTR,HLA-A,IFITM3,Wfdc18
PARP1		enzyme				0.0492	CCND1
ZNF106		other				0.0177	IFITM3
RCE1		peptidase				0.0165	TGFB2
HDAC3		transcription regulator				0.0387	CCND1
NKX2-1		transcription regulator				0.00237	HLA-A,TGFB2
EPHB4		kinase				0.0205	TGFB2
PTH1R		G-protein coupled receptor				0.0125	CCND1
POU5F1		transcription regulator				0.00785	CCND1,TGFB2
TSC2		other				0.00121	CCND1,IFITM3
salinomycin		chemical - endogenous non-mammalian				0.00365	CCND1
JARID2		transcription regulator				0.00526	CCND1
genipin		chemical - endogenous non-mammalian				0.00365	CCND1
JQ1		chemical reagent				0.00102	CCND1,CFTR
THRB		ligand-dependent nuclear receptor				0.00528	CCND1,CFTR
FOXF1		transcription regulator				0.00849	CCND1
EIF2S1		translation regulator				0.0213	CCND1
KLF10		transcription regulator				0.00809	CCND1
IGFBP5		other				0.00929	CCND1
PLAUR		transmembrane receptor				0.0165	CCND1
STK3		kinase				0.00647	CCND1
FECH		enzyme				0.0125	CCND1
PIAS1		transcription regulator				0.0149	CCND1
PPARGC1B		transcription regulator				0.0288	CCND1
PPARA		ligand-dependent nuclear receptor				0.0141	CCND1,IFITM3
TRPC1		ion channel				0.00889	CCND1
JUND		transcription regulator				0.0324	CCND1
MAPK12		kinase				0.00889	CCND1
GAS5		other				0.00768	CCND1
ETV5		transcription regulator				0.0395	CCND1
FOXO4		transcription regulator				0.0438	CCND1
PER2		transcription regulator				0.00607	CCND1
BSG		transporter				0.0205	CCND1
PIK3CG		kinase				0.0422	HLA-A
rigosertib		chemical drug				0.00203	CCND1
IFNL1		cytokine				0.0344	IFITM3
SGI 1776		chemical drug				0.00122	CCND1
pituitary adenylate cyclase-activating polypeptide		biologic drug				0.0173	CCND1
CCNDBP1		other				0.000811	CCND1
PLAU		peptidase				0.0276	CCND1
RBM14		transcription regulator				0.00203	CCND1
ZEB2		transcription regulator				0.0217	CCND1
ATM		kinase				0.0288	CCND1
WNT5B		other				0.00365	CCND1
IRS2		enzyme				0.0169	CCND1
HDAC7		transcription regulator				0.00849	CCND1
ANGPT1		growth factor				0.0177	CCND1
RB1CC1		other				0.00486	CCND1
HEXIM1		transcription regulator				4.37e-05	CCND1,TGFB2
PKM		kinase				0.0269	CCND1
Raet1d/Raet1e		other				0.000811	HLA-A
RLN2		other				0.00567	TGFB2
APP		other				0.00538	CCND1,KCNE3,TUBA1A
NRG1		growth factor				0.00502	CCND1,TGFB2
SEPTIN9		enzyme				0.00162	CCND1
SAA1		transporter				0.0153	CCND1
BANCR		other				0.00284	CCND1
PTCSC3		other				0.00445	CCND1
ADORA2A		G-protein coupled receptor				0.00132	IFITM3,SPARC
CSF2		cytokine				0.0182	CCND1,IFITM3
TOB2		other				0.000406	CCND1
COX4I1		enzyme				0.00567	TGFB2
FGFR3		kinase				9.67e-05	CCND1,SPARC
DTX1		transcription regulator				0.0109	TGFB2
RALGDS		other				0.00122	CCND1
SRSF3		other				0.00567	CCND1
SUB1		transcription regulator				0.0117	CCND1
CXCR4		G-protein coupled receptor				0.0241	CCND1
VAV1		transcription regulator				0.0125	CCND1
NFIX		transcription regulator				0.00889	CCND1
BCAR1		enzyme				0.00526	CCND1
XIAP		enzyme				0.0101	CCND1
TNF		cytokine		0.819	bias	0.000408	CCND1,CFTR,HLA-A,SPARC,TGFB2
CDH1		other				0.0336	CCND1
KRAS		enzyme				9.25e-05	CCND1,CFTR,IFITM3,SPARC
HOXB13		transcription regulator				0.0117	CCND1
FLOT1		other				0.00203	CCND1
GLI2		transcription regulator				0.0426	CCND1
RUVBL2		transcription regulator				0.00445	CCND1
SERPINF1		other				0.0229	CCND1
MBD3		other				0.0328	CCND1
GAL		other				0.00688	Wfdc18
TOB1		transcription regulator				0.0193	CCND1
GPI		enzyme				0.00688	CCND1
MGAT4A		enzyme				0.00122	CCND1
KLF4		transcription regulator				0.00014	CCND1,IFITM3,TGFB2
NCOA3		transcription regulator				0.000562	CCND1,TGFB2
DUSP1		phosphatase				0.0461	TGFB2
WNT4		cytokine				0.0125	CCND1
CCND2		other				0.00365	CCND1
GALR1		G-protein coupled receptor				0.00162	CCND1
GHR		transmembrane receptor				0.0213	CCND1
MYBL2		transcription regulator				0.0193	CCND1
SOX1		transcription regulator				0.0292	TGFB2
ATF6		transcription regulator				0.0257	SPARC
MLH1		enzyme				0.00405	CCND1
CYP19A1		enzyme				0.0308	CCND1
WNK4		kinase				0.00203	CFTR
STAT5B		transcription regulator				0.00562	CCND1,Wfdc18
BCL2		transporter				0.000827	CCND1,TGFB2
CD2		transmembrane receptor				0.0169	CCND1
RPS6KB1		kinase				0.0177	CCND1
ADRA1B		G-protein coupled receptor				0.0193	CCND1
PAX5		transcription regulator				0.0229	CCND1
MAP2K5		kinase				0.00929	CCND1
AKR1B1		enzyme				0.00728	CCND1
TP73		transcription regulator				0.0113	TGFB2,Wfdc18
IFI16		transcription regulator				0.0312	CCND1
GPS2		transcription regulator				0.0257	CCND1
IFI30		enzyme				0.00122	HLA-A
CDKN1A		kinase				0.00498	CCND1,IFITM3
MAOA		enzyme				0.00324	CCND1
MFGE8		other				0.00324	CCND1
DHX9		enzyme				0.00809	CCND1
PSEN1		peptidase				0.0105	CCND1,TUBA1A
EIF2B1		translation regulator				0.00122	CCND1
PSAP		enzyme				0.00203	CCND1
PIN1		enzyme				0.032	CCND1
SYK		kinase				0.000888	CCND1,CFTR
CRYAB		other				0.0113	CCND1
VDR		transcription regulator				0.00393	CCND1,TGFB2
ATP2A2		transporter				0.00728	CCND1
ITGB4		transmembrane receptor				2.49e-05	CCND1,SPARC
RXRA		ligand-dependent nuclear receptor				0.0062	CCND1,TGFB2
NUDT21		other				0.00203	SPARC
P2RY2		G-protein coupled receptor				0.0101	CCND1
B2M		transmembrane receptor				0.0117	HLA-A
AHNAK		other				0.00122	CCND1
SP3		transcription regulator				0.00325	CCND1,SPARC
SYVN1		transporter				0.00142	CCND1,HLA-A
NTRK2		kinase				0.03	CCND1
IL2RG		transmembrane receptor				0.0221	HLA-A
ATF3		transcription regulator				0.0414	CCND1
NASP		other				0.000811	CCND1
AVP		other				0.0193	CCND1
RAC1		enzyme				0.0465	CCND1
PER1		transcription regulator				0.00849	CCND1
DIRAS3		enzyme				0.00647	CCND1
ERBB4		kinase				0.0347	CCND1
PRKAR1A		kinase				0.0125	CCND1
MAP3K1		kinase				0.000207	CCND1,Wfdc18
NRAS		enzyme				0.00279	CCND1,HLA-A
GTPBP4		enzyme				0.000406	CCND1
SPHK1		kinase				0.0189	CCND1
SMAD4		transcription regulator				0.00409	CCND1,TGFB2
PORCN		enzyme				0.00203	CCND1
BAX		transporter				0.0213	HLA-A
ERBB3		kinase				0.000936	CCND1,SPARC
AXIN1		other				0.00849	CCND1
TRAF4		other				0.00567	CCND1
SP4		transcription regulator				0.0117	CCND1
CTSB		peptidase				0.0109	CCND1
PIK3R1		kinase				0.000525	CCND1,TGFB2
AIF1		other				0.00526	CCND1
ARAF		kinase				0.00324	CCND1
SETD7		enzyme				0.00405	CCND1
PIK3C3		kinase				0.00284	HLA-A
IQGAP2		other				0.00567	CCND1
KAT5		transcription regulator				0.000782	CCND1,CFTR
CD69		transmembrane receptor				0.0113	TGFB2
USP18		peptidase				0.0125	IFITM3
MSH2		enzyme				0.00365	CCND1
SOCS3		phosphatase				0.0375	CCND1
IFNE		cytokine				0.0173	IFITM3
CCN5		growth factor				0.0209	SPARC
KHDRBS1		transcription regulator				0.00284	CCND1
IGFBP2		other				0.0213	CCND1
TRPC3		ion channel				0.00243	CCND1
TP63		transcription regulator				0.0151	CCND1,TGFB2
SRC		kinase				0.0488	CCND1
MAP2K7		kinase				0.0229	CCND1
BCL3		transcription regulator				0.0253	CCND1
GNAI2		enzyme				0.0121	CCND1
KCNE2		ion channel				0.000811	KCNE3
CSF1R		kinase				0.0169	CCND1
FGFR1		kinase				0.000654	CCND1,SPARC
LMO4		transcription regulator				0.00486	CCND1
RBL2		other				0.0402	CCND1
EZH2		transcription regulator				0.0106	CCND1,TGFB2
EP300		transcription regulator				0.0128	CCND1,TGFB2
MAP3K5		kinase				0.00889	CCND1
NCOA2		transcription regulator				0.0441	CCND1
MMP2		peptidase				0.0145	CCND1
DGKZ		kinase				0.00324	CCND1
F7		peptidase				0.0165	CCND1
IRF1		transcription regulator				4.77e-05	CCND1,CFTR,IFITM3
AHR		ligand-dependent nuclear receptor				0.009	CCND1,TGFB2
LCAT		enzyme				0.0097	CCND1
NF2		other				0.0129	CCND1
DKK1		growth factor				0.000319	CCND1,SPARC
N4BP1		other				0.00405	HLA-A
MTA1		transcription regulator				0.0189	CCND1
KCNIP3		transcription regulator				0.00768	CCND1
AGTR1		G-protein coupled receptor				0.0169	CCND1
FGF8		growth factor				0.000601	CCND1,SPARC
KIF1B		transporter				0.00607	CCND1
UBTF		transcription regulator				0.00162	CCND1
ISG15		other				0.00284	IFITM3
PTGS1		enzyme				0.0169	CFTR
S100A1		other				0.00122	TUBA1A
OGT		enzyme				0.0379	CCND1
CXCR3		G-protein coupled receptor				0.00889	CFTR
PTTG1IP		other				0.00122	CCND1
SIX3		transcription regulator				0.00243	CCND1
MAP2K6		kinase				0.0308	CCND1
NUMBL		other				0.00486	SPARC
BCAR3		other				0.00203	CCND1
CEL		enzyme				0.00203	CCND1
CCNT1		transcription regulator				0.00486	CCND1
SLC9A3		ion channel				0.0109	CCND1
NLRP12		other				0.0145	HLA-A
WNT7B		other				0.00324	CCND1
GDNF		growth factor				0.0284	CCND1
TP53INP1		other				0.00284	SPARC
FBXO4		enzyme				0.000811	CCND1
BCLAF1		transcription regulator				0.00122	CCND1
PTPRC		phosphatase				0.0169	CCND1
RB1		transcription regulator				2.54e-05	CCND1,IFITM3,TGFB2,TUBA1A
HNF1B		transcription regulator				0.048	SPARC
FHL2		transcription regulator				0.0209	CCND1
SRPK2		kinase				0.00122	CCND1
USF2		transcription regulator				0.0253	CFTR
FGF2		growth factor				0.000531	CCND1,SPARC,TGFB2
PTPN11		phosphatase				0.0316	CCND1
DNAJB6		transcription regulator				0.00688	SPARC
PTPRU		phosphatase				0.000406	CCND1
CLTC		other				0.00324	HLA-A
ACVR1C		kinase				0.00889	CCND1
GPD1		enzyme				0.0375	CCND1
HBEGF		growth factor				0.0177	CCND1
CTNNAL1		other				0.00162	CCND1
CCN2		growth factor				0.000796	CCND1,SPARC
GATA6		transcription regulator				0.00263	SPARC,TGFB2
ILKAP		phosphatase				0.000811	CCND1
MEF2A		transcription regulator				0.0185	TGFB2
TGFB1		growth factor		0.796	bias	0.00433	CCND1,SPARC,TGFB2,TUBA1A
SMAD3		transcription regulator				0.000143	CCND1,SPARC,TGFB2
PIM2		kinase				0.00688	CCND1
PRMT2		enzyme				0.00203	CCND1
F2		peptidase				0.00498	CCND1,TGFB2
DDIT3		transcription regulator				0.0469	TGFB2
PINK1		kinase				0.00365	CCND1
SMARCB1		transcription regulator				0.00208	CCND1,SPARC
LAMC1		other				0.00567	TGFB2
TGFBR1		kinase				0.0351	CCND1
FGF19		growth factor				0.0351	CCND1
NFKB2		transcription regulator				0.0316	CCND1
ETS1		transcription regulator				0.00346	CCND1,TGFB2
TBP		transcription regulator				0.0269	HLA-A
HOXA4		transcription regulator				1.33e-05	CCND1,TGFB2
PRMT1		enzyme				0.0209	CCND1
NFATC1		transcription regulator				0.0422	CCND1
YAP1		transcription regulator				0.00524	CCND1,TGFB2
DDX17		enzyme				0.00688	CCND1
CEBPD		transcription regulator				0.0402	CCND1
C5AR1		G-protein coupled receptor				0.0249	TGFB2
PSMD10		transcription regulator				0.0105	CCND1
CCND3		kinase				0.00809	CCND1
DDX3X		enzyme				0.00647	CCND1
ECT2		other				0.00203	CCND1
MECOM		transcription regulator				0.0125	SPARC
CTAG1A/CTAG1B		other				0.00122	CCND1
IFRD1		other				0.0125	Wfdc18
ITGB3		transmembrane receptor				0.0284	SPARC
KNG1		other				0.0125	CCND1
PHB		transcription regulator				0.00929	CCND1
PMS2		enzyme				0.000406	CCND1
SHCBP1		other				0.00284	CCND1
SNAI2		transcription regulator				0.0257	CCND1
SOX3		transcription regulator				0.032	TGFB2
THBS1		other				0.0149	TGFB2
SIRT1		transcription regulator				0.000478	CCND1,HLA-A,IFITM3
MAPK3		kinase				0.0347	CCND1
NLRC5		transcription regulator				0.00849	HLA-A
SP2		transcription regulator				0.00607	CCND1
GOPC		transporter				0.00122	CFTR
FZR1		kinase				0.00526	CCND1
TLR9		transmembrane receptor				0.00412	CCND1,Wfdc18
ACKR3		G-protein coupled receptor				0.0125	CCND1
STX2		transporter				0.00243	CCND1
SNRK		kinase				0.00162	CCND1
TNIP1		other				0.0165	HLA-A
YBX3		transcription regulator				0.00365	CCND1
LMNB1		other				0.0217	TGFB2
WNT11		other				0.0121	TGFB2
RPTOR		other				0.0402	CCND1
ARHGEF2		other				0.00122	CCND1
PRNP		other				0.0312	CCND1
DDX4		enzyme				0.00122	IFITM3
PTCH1		transmembrane receptor				0.0117	CCND1
NDRG1		kinase				0.0149	CCND1
MAPK7		kinase				0.0197	CCND1
S1PR1		G-protein coupled receptor				0.00809	CCND1
PRKCB		kinase				0.0237	CCND1
MYCN		transcription regulator				0.00017	CCND1,HLA-A,SPARC
CDX1		transcription regulator				0.0209	CCND1
TFF2		other				0.00243	CCND1
YY1		transcription regulator				0.00558	CFTR,TGFB2
EPCAM		other				0.00889	CCND1
PTPN6		phosphatase				0.0225	CCND1
YWHAB		other				0.00243	CCND1
PDPK1		kinase				0.0133	CCND1
PTTG1		transcription regulator				0.03	CCND1
PTHLH		other				0.0288	CCND1
LGALS3		other				0.0391	CCND1
KRIT1		other				0.00486	TGFB2
KDM5B		transcription regulator				0.00131	CCND1,TGFB2
GTF2I		transcription regulator				0.00567	CCND1
CASR		G-protein coupled receptor				0.00132	CCND1,TGFB2
FGF7		growth factor				0.0288	CCND1
PLAT		peptidase				0.0137	CCND1
RASSF7		other				0.00122	CCND1
SGK1		kinase				0.0265	CFTR
VCAM1		transmembrane receptor				0.00203	CCND1
TAPBP		transporter				0.00324	HLA-A
VEGFD		growth factor				0.00526	CCND1
CAPNS1		peptidase				0.00284	CCND1
NFKB1		transcription regulator				0.00528	CCND1,CFTR
RELA		transcription regulator				0.0145	CCND1,CFTR
IL6ST		transmembrane receptor				0.0253	CCND1
RND3		enzyme				0.00809	CCND1
CCAT2		other				0.00688	CCND1
FOSB		transcription regulator				0.0149	CCND1
GAST		other				0.0324	CCND1
S3I-1757		chemical reagent				0.00162	CCND1
IRF9		transcription regulator				0.0197	IFITM3
XPO1		transporter				0.00728	CCND1
PIWIL2		enzyme				0.00324	CCND1
RUNX2		transcription regulator				0.0496	CCND1
CYP1A1		enzyme				0.0398	CCND1
NRIP1		transcription regulator				0.0253	CCND1
CCR1		G-protein coupled receptor				0.0109	SPARC
IFNG		cytokine		1.317	bias	5.5e-06	CCND1,CFTR,HLA-A,IFITM3,TGFB2,Wfdc18
NF1		other				0.0117	CCND1
TFPI2		other				0.00929	CCND1
BTG2		transcription regulator				0.0101	CCND1
IFNA2		cytokine				0.00409	HLA-A,IFITM3
PRDX2		enzyme				0.00647	CCND1
FOXO3		transcription regulator				0.00789	CCND1,TGFB2
HGF		growth factor				0.0164	CCND1,TGFB2
MAML1		transcription regulator				0.00647	CCND1
PRKD1		kinase				0.0193	CCND1
KAT2A		enzyme				0.0105	CCND1
FOSL1		transcription regulator				0.000421	CCND1,SPARC
DPH1		other				0.000811	CCND1
GRN		growth factor				0.00889	CCND1
PES1		other				0.00122	CCND1
CDC27		other				0.00203	CCND1
CBL		transcription regulator				0.0225	CFTR
SNW1		transcription regulator				0.00284	CCND1
MIF		cytokine				0.0488	CCND1
AR		ligand-dependent nuclear receptor				0.0178	CCND1,TGFB2
CNR2		G-protein coupled receptor				0.00647	CCND1
MAPK1		kinase				0.0101	CCND1,IFITM3
EIF2AK2		kinase				0.000681	CCND1,TUBA1A
ROR2		kinase				0.0312	CCND1
RBBP8		enzyme				0.00122	CCND1
SNAI1		transcription regulator				0.00169	CCND1,SPARC
EGF		growth factor				0.0191	CCND1,SPARC
ABL1		kinase				0.000113	CCND1,TGFB2
PAK1		kinase				0.0137	CCND1
FOXF2		transcription regulator				0.00929	CCND1
HRAS		enzyme				0.00211	CCND1,SPARC,TGFB2
STAT5A		transcription regulator				0.00577	CCND1,Wfdc18
CDK20		kinase				0.000406	CCND1
DYRK1A		kinase				0.00929	CCND1
NR5A2		ligand-dependent nuclear receptor				0.0438	CCND1
NFIC		transcription regulator				0.0101	CCND1
CYP1B1		enzyme				0.0225	CCND1
PLAC8		other				0.00162	CCND1
TNFSF10		cytokine				0.0406	HLA-A
ITK		kinase				0.034	HLA-A
E2F2		transcription regulator				0.0292	CCND1
DDX5		enzyme				0.00849	CCND1
EXT1		enzyme				0.00405	CCND1
IQGAP1		other				0.00405	CCND1
SULF1		enzyme				0.00324	CCND1
BMP2		growth factor				0.00307	CCND1,SPARC
ERBB2		kinase				0.000242	CCND1,SPARC,TUBA1A,Wfdc18
UBE2I		enzyme				0.0133	CCND1
CCDC80		other				0.00324	CCND1
CGA		other				0.0414	CCND1
THBS4		other				0.0125	TGFB2
RBCK1		transcription regulator				0.00324	CCND1
KLF5		transcription regulator				0.0237	CCND1
IL6		cytokine				0.0032	CCND1,HLA-A,IFITM3
CDKN1B		kinase				0.0469	CCND1
PLCL1		enzyme				0.00647	SPARC
IRF5		transcription regulator				0.0351	IFITM3
PTOV1		other				0.000406	CCND1
DAXX		transcription regulator				0.00688	CCND1
PPP5C		phosphatase				0.00526	CCND1
PRKACA		kinase				0.0185	CCND1
SMARCA4		transcription regulator				0.00171	CCND1,IFITM3,TGFB2
SLC9A3R2		transporter				0.00162	CCND1
ILK		kinase				0.0177	CCND1
GSK3B		kinase				0.0484	CCND1
OSM		cytokine				0.00122	CCND1,HLA-A,TUBA1A
TXNIP		other				0.0181	CCND1
JAG1		growth factor				0.0217	CCND1
RHOA		enzyme				0.0359	CCND1
RET		kinase				0.0453	CCND1
FGF9		growth factor				0.0105	CCND1
IL1B		cytokine				0.00572	CFTR,HLA-A,SPARC
SMO		G-protein coupled receptor				0.034	CCND1
NFKBIA		transcription regulator		1.364	bias	1.81e-05	CCND1,CFTR,HLA-A,TGFB2
TEAD2		transcription regulator				0.0205	CCND1
DYSF		other				0.0316	HLA-A
MST1R		kinase				0.00768	CCND1
RELB		transcription regulator				0.03	CCND1
CCN1		other				0.0344	CCND1
MTPN		transcription regulator		1.969	bias	2.15e-08	CCND1,SPARC,TGFB2,TUBA1A
CDH13		other				0.00203	CCND1
BAG1		other				0.0109	CCND1
NEDD9		other				0.0351	TUBA1A
FASLG		cytokine				0.0169	TGFB2
ZBTB17		transcription regulator				0.0328	CCND1
GNAQ		enzyme				0.00109	CCND1,TGFB2
2-[[9-isopropyl-6-[[4-(2-pyridyl)phenyl]methylamino]purin-2-yl]amino]butan-1-ol		chemical - kinase inhibitor				0.00445	CCND1
SLC25A13		transporter				0.0383	CCND1
CDKN1C		other				0.00405	CCND1
UBR5		enzyme				0.00445	CCND1
ARF1		enzyme				0.00162	CCND1
CDC42		enzyme				0.0137	CCND1
CCR2		G-protein coupled receptor				0.00092	SPARC,TGFB2
Cox5b		other				0.00203	TGFB2
Elf5		transcription regulator				0.00284	Wfdc18
EWSR1		other				8.15e-05	CCND1,KCNE3
MUC4		other				0.00768	CCND1
RC3H1		enzyme				0.0284	IFITM3
C5		cytokine				0.0496	CCND1
HIC1		transcription regulator				0.0245	CCND1
CYP2C9		enzyme				0.00122	CCND1
KRT10		other				0.00203	CCND1
HRG		other				0.00809	SPARC
PPP1R15A		other				0.00809	CCND1
Mt1		other				0.0109	CCND1
Mt2		other				0.0097	CCND1
Muc1		transmembrane receptor				0.00203	CCND1
MUC1		other				0.0265	CCND1
RBPJ		transcription regulator				0.00165	CCND1,TGFB2
TBX2		transcription regulator				0.0304	TGFB2
TNIK		kinase				0.00284	CCND1
FUS		transcription regulator				0.00405	CCND1
PCDH11Y		other				0.00849	CCND1
SST		other				0.0177	CCND1
HMGB2		transcription regulator				0.0105	CCND1
Rfx5		other				0.00324	HLA-A
RDH16		enzyme				0.00122	CCND1
PELP1		other				0.0492	CCND1
NR2C2		ligand-dependent nuclear receptor				0.0101	CCND1
PRKN		enzyme				0.0157	CCND1
EBI3		cytokine				0.0225	HLA-A
SRSF2		transcription regulator				0.0173	CCND1
RFXANK		transcription regulator				0.00203	HLA-A
ATAD2		enzyme				0.00122	CCND1
RECK		other				0.00365	CCND1
PDGFC		growth factor				0.00889	CCND1
AZGP1		transporter				0.0109	CCND1
BRAF		kinase				0.041	CCND1
ATF2		transcription regulator				0.000627	CCND1,TGFB2
PITX1		transcription regulator				0.00486	CCND1
NPPA		other				0.0117	CCND1
CAMKK2		kinase				0.00526	CCND1
ID2		transcription regulator				0.00319	CCND1,TUBA1A
TGFBR2		kinase				5.82e-05	CCND1,SPARC,TGFB2
ESR1		ligand-dependent nuclear receptor				0.016	CCND1,IFITM3,TGFB2
S100P		other				0.00405	CCND1
ACTN4		transcription regulator				0.00768	CCND1
PRKCH		kinase				0.00405	CCND1
MYC		transcription regulator		-0.431	bias	0.000914	CCND1,HLA-A,SPARC,TGFB2
NME1		kinase				0.0177	CCND1
CXXC4		other				2.19e-06	CCND1,SPARC
WNT3A		cytokine				0.000179	CCND1,SPARC,TGFB2
MEF2D		transcription regulator				0.000368	CCND1,TGFB2
DNM2		enzyme				0.00162	CFTR
CLDN2		other				0.00203	CCND1
GSK2816126		chemical drug				0.0189	SPARC
ULBP1		transmembrane receptor				0.00324	HLA-A
CSNK2A1		kinase				0.00809	CCND1
RPLP0		other				0.000406	CCND1
(E)-1-(2-nitrovinyl)naphthalene		chemical reagent				0.00122	CCND1
(E)-9-(2-nitrovinyl)anthracene		chemical reagent				0.00122	CCND1
sorafenib derivative SC-1		chemical reagent				0.000811	CCND1
LY5		chemical reagent				0.00162	CCND1
CIMO		chemical reagent				0.00243	CCND1
scoparone		chemical - endogenous non-mammalian				0.00203	CCND1
imipramine blue		chemical drug				0.0133	CCND1
6-aminopyrazolopyrimidine derivative compound II		chemical - kinase inhibitor				0.00526	IFITM3
emactuzumab		biologic drug				0.00445	IFITM3
vatalanib		chemical drug				0.00526	CCND1
silibinin		chemical drug				0.0288	CCND1
ciprofloxacin		chemical drug				0.0441	HLA-A
ciglitazone		chemical drug				0.032	CCND1
PD 169316		chemical - kinase inhibitor				0.00849	CCND1
diethylstilbestrol		chemical drug				0.000215	CCND1,HLA-A,SPARC
herbimycin		chemical - kinase inhibitor				0.0193	CCND1
PD184352		chemical drug				0.00929	CCND1
phenylacetic acid		chemical - endogenous mammalian				0.00162	HLA-A
diclofenac		chemical drug				0.0141	CCND1
carboxyamido-triazole		chemical drug				0.00162	CCND1
Bay 11-7082		chemical - kinase inhibitor				0.0304	CCND1
ambroxol		chemical drug				0.00243	CFTR
bosutinib		chemical drug				0.00445	CCND1
gemcitabine		chemical drug				0.0261	CCND1
naproxen		chemical drug				0.00324	CCND1
zoledronic acid		chemical drug				0.0165	SPARC
methylnitronitrosoguanidine		chemical toxicant				0.0117	CCND1
indirubin		chemical drug				0.00728	CCND1
silicon phthalocyanine		chemical drug				0.00203	CCND1
gefitinib		chemical drug				0.00222	CCND1,Wfdc18
carbamylcholine		chemical drug				0.0161	CCND1
temsirolimus		chemical drug				0.00203	CCND1
methylmercury		chemical toxicant				0.0265	SPARC
phosphorylethanolamine		chemical - endogenous mammalian				0.000811	CCND1
clotrimazole		chemical drug				0.00486	CCND1
inostamycin		chemical reagent				0.000811	CCND1
trabectedin		chemical drug				0.0109	CCND1
benzyl isothiocyanate		chemical - endogenous non-mammalian				0.0165	CCND1
acetoacetic acid		chemical - endogenous mammalian				0.00162	CCND1
sorafenib		chemical drug				0.0157	CCND1
1,4-bis[2-(3,5-dichloropyridyloxy)]benzene		chemical toxicant				0.0473	CCND1
SU6656		chemical toxicant				0.0141	CCND1
diethylnitrosamine		chemical toxicant				0.0441	CCND1
phenethyl isothiocyanate		chemical drug				0.0426	CCND1
amlexanox		chemical drug				0.000406	CCND1
ethosuximide		chemical drug				0.00768	CCND1
celecoxib		chemical drug				0.05	CCND1
raloxifene		chemical drug				0.00205	CCND1,TGFB2
GW501516		chemical drug				0.0414	CCND1
clioquinol		chemical drug				0.00445	CCND1
acetaminophen		chemical drug				0.00237	CCND1,TUBA1A
rotenone		chemical toxicant				0.0253	CCND1
4-phenylbutyric acid		chemical - endogenous mammalian				0.000562	CCND1,HLA-A
neratinib		chemical drug				0.000811	CCND1
1-methyl-4-phenylpyridinium		chemical toxicant				0.00809	CCND1
urethane		chemical toxicant				0.0121	CCND1
ibuprofen		chemical drug				0.0169	CCND1
Sb202190		chemical - kinase inhibitor				0.00123	CCND1,CFTR
dithiothreitol		chemical reagent				0.0121	CCND1
phenylbutazone		chemical drug				0.0241	CCND1
indomethacin		chemical drug				0.00406	CCND1,IFITM3
decursin		chemical - endogenous non-mammalian				0.00688	CCND1
pimozide		chemical drug				0.00607	CCND1
sulfasalazine		chemical drug				0.00809	CCND1
KP-SD-1		chemical - kinase inhibitor				0.00162	CCND1
okadaic acid		chemical toxicant				0.0379	CCND1
KN-62		chemical - kinase inhibitor				0.0101	CCND1
deferoxamine		chemical drug				0.0029	CCND1,TGFB2
calphostin C		chemical - kinase inhibitor				0.0273	CCND1
PD 153035		chemical drug				0.00849	CCND1
nitrofurantoin		chemical drug				0.00194	CCND1,TUBA1A
NS-398		chemical reagent				0.0402	CCND1
sulfaphenazole		chemical drug				0.000406	CCND1
brefeldin A		chemical - endogenous non-mammalian				0.0209	HLA-A
everolimus		chemical drug				0.0169	CCND1
hydroxyurea		chemical drug				0.0265	CCND1
1,2-dimethylhydrazine		chemical toxicant				0.00526	CCND1
SB203580		chemical - kinase inhibitor				0.000713	CCND1,SPARC,TGFB2
sulindac sulfide		chemical drug				0.0284	CCND1
2-acetylaminofluorene		chemical toxicant				0.00647	CCND1
KN 93		chemical - kinase inhibitor				0.0129	CCND1
azoxymethane		chemical toxicant				0.0261	CCND1
losartan potassium		chemical drug				0.0461	TGFB2
ethanol		chemical - endogenous mammalian				0.000444	CCND1,HLA-A,TGFB2
nocodazole		chemical reagent				0.0355	CCND1
2-hydroxy-1-naphthylaldehyde isonicotinoyl hydrazone		chemical reagent				0.00405	CCND1
tetrachlorodibenzodioxin		chemical toxicant				0.000397	CCND1,KCNE3,TGFB2
nafenopin		chemical drug				0.0149	CCND1
cyclopentenone		chemical reagent				0.00365	CCND1
U0126		chemical - kinase inhibitor				0.00106	CCND1,CFTR,TGFB2
salmeterol		chemical drug				0.00567	CFTR
pirfenidone		chemical drug				0.00768	TGFB2
fasudil		chemical drug				0.0169	TGFB2
entinostat		chemical drug				0.0284	CCND1
oxaliplatin		chemical drug				0.0261	CCND1
calyculin A		chemical toxicant				0.0105	CCND1
captopril		chemical drug				0.0312	TGFB2
Ro 20-1724		chemical reagent				0.000406	CCND1
crocidolite asbestos		chemical toxicant				0.0125	CCND1
dibenzoylmethane		chemical toxicant				0.00243	CCND1
quinidine		chemical drug				0.00405	CCND1
vandetanib		chemical drug				0.00324	CCND1
rocuronium		chemical drug				0.00122	CCND1
trovafloxacin		chemical drug				0.0273	HLA-A
histone deacetylase		complex				0.0161	CCND1
(S)-flurbiprofen		chemical drug				0.000811	CCND1
tarenflurbil		chemical drug				0.00122	CCND1
bafilomycin A1		chemical drug				0.0141	CFTR
sphingosine-1-phosphate		chemical - endogenous mammalian				0.0367	CCND1
fluvastatin		chemical drug				0.0157	CCND1
7-(4-fluorobenzylamino)-1,3,4,8-tetrahydropyrrolo[4,3,2-de]quinolin-8(1H)-one		chemical reagent				0.00445	CCND1
calcitriol		chemical drug				0.0213	CCND1,TGFB2
enterolactone		chemical - endogenous mammalian				8.03e-06	CCND1,SPARC
2-amino-1-methyl-6-phenylimidazo-4-5-b-pyridine		chemical toxicant				0.0181	CCND1
BCR-ABL1		fusion gene/product				0.0367	CCND1
bexarotene		chemical drug				5.32e-05	CCND1,SPARC,TGFB2
SB-431542		chemical reagent				0.00092	CCND1,TGFB2
letrozole		chemical drug				0.0117	CCND1
synthetic peptide		chemical reagent				0.000406	SPARC
9,10-dimethyl-1,2-benzanthracene		chemical toxicant				0.0205	CCND1
sulindac		chemical drug				0.0261	CCND1
SP600125		chemical - kinase inhibitor				0.00612	CCND1,SPARC
(+)-MK-801		chemical drug				0.0316	CCND1
3-methylcholanthrene		chemical toxicant				0.0221	CCND1
pyrrolidine dithiocarbamate		chemical reagent				0.0434	CFTR
SB 216763		chemical toxicant				0.0189	CCND1
melatonin		chemical - endogenous mammalian				0.0457	SPARC
mitomycin C		chemical drug				0.0245	CCND1
Go 6976		chemical - kinase inhibitor				0.0261	CCND1
bilirubin		chemical - endogenous mammalian				0.00889	CCND1
R-WIN 55,212		chemical reagent				0.0121	CCND1
phenobarbital		chemical drug				0.0336	CCND1
betamethasone valerate		chemical drug				0.00122	CCND1
resveratrol		chemical drug				0.00604	CCND1,TGFB2
anti-miR-302d		chemical reagent				0.000406	CCND1
piceatannol		chemical - endogenous non-mammalian				0.0101	CCND1
5-nitro-2-(3-phenylpropylamino)benzoic acid		chemical reagent				0.00324	CCND1
anti-miR-302c inhibitor		chemical reagent				0.000406	CCND1
rottlerin		chemical toxicant				0.0312	CCND1
zearalenone		chemical toxicant				0.00688	CCND1
pterostilbene		chemical drug				0.00445	CCND1
beta-penta-O-galloyl-glucose		chemical - endogenous non-mammalian				0.000406	CCND1
sodium orthovanadate		chemical reagent				0.0141	CCND1
sodium arsenite		chemical drug				0.0249	CCND1
GSI34		chemical reagent				0.00243	CCND1
lithium chloride		chemical drug				0.0488	CCND1
cadmium chloride		chemical toxicant				0.0241	CCND1
DETA-NONOate		chemical reagent				0.0217	CCND1
hemin		chemical - endogenous mammalian				0.0359	CCND1
zinc protoporphyrin IX		chemical - endogenous mammalian				0.00607	CCND1
RUNX1-RUNX1T1		fusion gene/product				0.000668	IFITM3,KCNE3
SS18-SSX1		fusion gene/product				0.00324	CCND1
EML4-ALK		fusion gene/product				0.00809	SPARC
EWSR1-FLI1		fusion gene/product				0.032	CCND1
SS18-SSX2		fusion gene/product				0.00445	CCND1
KIN001-043		chemical - kinase inhibitor				0.0137	CCND1
TRKC-miR2		microRNA				0.00284	CCND1
Ro41-5253		chemical reagent				0.00929	TGFB2
retinol		chemical drug				0.00849	TGFB2
acyclic retinoid		chemical drug				0.00728	CCND1
tretinoin		chemical - endogenous mammalian				1.03e-05	CCND1,CFTR,HLA-A,SPARC,TGFB2,Wfdc18
fenretinide		chemical drug				0.0316	CCND1
gamma-tocotrienol		chemical drug				0.00567	CCND1
ascorbic acid		chemical - endogenous mammalian				0.0316	SPARC
N1,N11-diethylnorspermine		chemical drug				0.00567	CCND1
benzene		chemical toxicant				0.0233	SPARC
bromobenzene		chemical toxicant				0.028	TUBA1A
Pam3-Cys-Ser-Lys4		chemical reagent				0.00169	HLA-A,TGFB2
cyclosporin		biologic drug				0.00284	CCND1
myristoylated protein kinase A inhibitor 14-22 amide		chemical - kinase inhibitor				0.00486	CCND1
Z-VEID-FMK		chemical reagent				0.00243	CCND1
N-Ac-Leu-Leu-norleucinal		chemical - protease inhibitor				0.000455	CCND1,HLA-A
glutathione		chemical - endogenous mammalian				0.0269	CCND1
romidepsin		biologic drug				0.0316	CCND1
alvocidib		chemical drug				0.0149	CCND1
anti-benzo(a)pyrene-diol-epoxide		chemical toxicant				0.00567	CCND1
epirubicin		chemical drug				0.00849	CCND1
daunorubicin		chemical drug				0.0137	CFTR
indole-3-carbinol		chemical drug				0.0141	CCND1
3,3'-diindolylmethane		chemical drug				0.000329	CCND1,HLA-A
R-etodolac		chemical drug				0.00122	CCND1
salvin		chemical toxicant				0.00809	CCND1
forskolin		chemical toxicant				0.00252	CCND1,CFTR,TUBA1A
ursolic acid		chemical drug				0.0241	CCND1
bardoxolone		chemical drug				0.0137	CCND1
lycopene		chemical drug				0.00768	CCND1
betulinic acid		chemical drug				0.0129	CCND1
bardoxolone methyl		chemical drug				0.0121	CCND1
artemisinin		chemical drug				0.00324	CCND1
myricetin		chemical - endogenous non-mammalian				0.00647	CCND1
genistein		chemical drug				0.000467	CCND1,CFTR,HLA-A
baicalein		chemical drug				0.0189	CCND1
morin		chemical - endogenous non-mammalian				0.00647	CCND1
daidzein		chemical drug				0.000654	CCND1,HLA-A
fisetin		chemical toxicant				0.0137	CCND1
apigenin		chemical - endogenous non-mammalian				0.0324	CCND1
luteolin		chemical drug				0.0229	CCND1
capsaicin		chemical drug				0.000256	CCND1,TGFB2
monocrotaline		chemical toxicant				0.0193	CCND1
berberine		chemical drug				0.0438	CCND1
UCN-01		chemical drug				0.0101	CCND1
noscapine		chemical drug				0.00567	CCND1
cyclopamine		chemical reagent				0.000125	CCND1,SPARC
evodiamine		chemical - endogenous non-mammalian				0.00929	CCND1
vinblastine		chemical drug				0.0125	HLA-A
paclitaxel		chemical drug				0.00644	CCND1,HLA-A
morphine		chemical drug				0.00152	CCND1,SPARC
staurosporine		chemical - kinase inhibitor				0.00105	CCND1,CFTR
camptothecin		chemical drug				0.0239	CCND1,HLA-A
pentoxifylline		chemical drug				0.0165	CCND1
caffeic acid phenethyl ester		chemical drug				0.0422	CCND1
clofibrate		chemical drug				0.0395	CCND1
epinephrine		chemical - endogenous mammalian				0.0308	CCND1
vanadate		chemical - other				0.00768	CCND1
AG490		chemical - kinase inhibitor				0.0371	CFTR
adaphostin		chemical drug				0.00445	CCND1
tyrphostin AG 1478		chemical - kinase inhibitor				0.0292	CCND1
beta-glycerophosphoric acid		chemical - endogenous mammalian				0.00889	SPARC
I-BOP		chemical reagent				0.00365	CCND1
gemfibrozil		chemical drug				0.0284	CCND1
eicosapentenoic acid		chemical drug				0.0391	TGFB2
AICAR		chemical - endogenous mammalian				0.0332	CCND1
poly rI:rC-RNA		biologic drug				0.019	HLA-A,IFITM3
P1,P4-Di(adenosine-5') tetraphosphate		chemical - endogenous mammalian				0.00324	TGFB2
mizoribine		chemical drug				0.00122	CCND1
decitabine		chemical drug		0.579	bias	0.00019	CCND1,CFTR,SPARC,TGFB2
cytarabine		chemical drug				0.000319	HLA-A,TGFB2
fludarabine		chemical drug				0.0113	CCND1
lactacystin		chemical - protease inhibitor				0.00276	CCND1,HLA-A
gambogic acid		chemical - endogenous non-mammalian				0.00526	CCND1
honokiol		chemical - endogenous non-mammalian				0.0137	CCND1
dichlorovinylcysteine		chemical toxicant				0.0117	CCND1
N-acetyl-L-cysteine		chemical drug				0.00396	CCND1,CFTR
levodopa		chemical - endogenous mammalian				0.0289	CCND1,HLA-A
L-asparagine		chemical - endogenous mammalian				0.00162	CCND1
homocysteine		chemical - endogenous mammalian				0.0344	CCND1
lipopolysaccharide		chemical drug		-0.2	bias	0.000525	CCND1,CFTR,HLA-A,SPARC,TGFB2
methyl-beta-cyclodextrin		chemical drug				0.0105	CCND1
2-deoxyglucose		chemical drug				0.028	CCND1
cytokine		group				2.67e-05	CCND1,SPARC,TGFB2
aurothioglucose		chemical drug				0.00365	SPARC
Collagen type VI		complex				0.00162	CCND1
tetradecanoylphorbol acetate		chemical drug				0.0103	CCND1,CFTR,SPARC
cyproterone acetate		chemical drug				0.00567	CCND1
bufalin		chemical reagent				0.0125	CCND1
dehydroisoandrosterone		chemical - endogenous mammalian				0.0324	CCND1
methylprednisolone		chemical drug				0.0187	CCND1,SPARC
estrogen		chemical drug				3.37e-06	CCND1,CFTR,SPARC,TGFB2
R5020		chemical reagent				0.0363	CCND1
dihydrotestosterone		chemical - endogenous mammalian				5.72e-05	CCND1,HLA-A,SPARC,TGFB2	4 (2)
ponasterone A		chemical reagent				0.00122	CCND1
mifepristone		chemical drug				0.00724	CCND1,CFTR
progestin		chemical drug				0.0109	CCND1
mibolerone		chemical drug				0.0014	CCND1,TUBA1A
finasteride		chemical drug				0.00809	TGFB2
testosterone		chemical - endogenous mammalian				0.009	CCND1,TGFB2
progesterone		chemical - endogenous mammalian				0.0017	CCND1,CFTR,TGFB2
Ngf		group				0.0265	CCND1
diosgenin		chemical - endogenous non-mammalian				0.0097	CCND1
3',4',7-trihydroxyisoflavone		chemical - endogenous non-mammalian				0.00243	CCND1
lead acetate		chemical toxicant				0.00365	CCND1
ethidium		chemical drug				0.00688	CCND1
Cd2+		chemical toxicant				0.00567	CCND1
Cu2+		chemical - endogenous mammalian				0.00445	CCND1
arsenite		chemical toxicant				0.000952	CCND1,TGFB2
iron		chemical - endogenous mammalian				0.0217	CCND1
zinc		chemical drug				0.0336	CCND1
cadmium		chemical toxicant				0.03	CCND1
PC-SPES		chemical drug				0.0387	CCND1
TCF		group				0.0363	CCND1

## Sheet: DBA+ duct cluster 4 vs 1
© 2000-2020 QIAGEN. All rights reserved.
Upstream Regulator	Expr Log Ratio	Molecule Type	Predicted Activation State	Activation z-score	Flags	p-value of overlap	Target Molecules in Dataset	Mechanistic Network
IL4		cytokine		1.106	bias	6.96e-19	ACTB,ACTG1,AHNAK,AKAP13,ANXA2,APOE,Bst2,C3,CCND2,CD44,CSF1,CXCL16,EFHD2,FLRT2,IFITM3,IGF1,IL6ST,JAG1,JUNB,JUND,KLF6,LTB,NFKB2,NFKBIA,PIGR,PLEC,PLSCR1,RNF213,S100A10,SAMD4A,SPP1,TGFB3,TMEM176B	68 (18)
TGFB1		growth factor		1.765	bias	1.98e-17	AHNAK,ANKRD1,ANXA2,APOE,C3,CCND2,CD44,CLDN4,CSF1,DAAM1,DDX21,DSG2,FOXJ1,GADD45B,HSPG2,IFRD1,IGF1,ILK,ITGA3,JAG1,JUNB,JUND,KRT18,KRT19,KRT7,KRT8,MYL12A,NFKBIA,NUPR1,PDPN,PLSCR1,PPP1R1B,S100A10,SPARC,SPP1,SPPL2A,TGFB2,TGFB3,Tpm1,Tpm4,TUBA1A	70 (17)
dexamethasone		chemical drug		0.753		4.56e-17	ACTB,ACTG1,AKAP13,ANKRD1,ANXA3,APOE,BIRC3,C3,CCND2,CD44,CD47,CES1,CSF1,EZR,FLRT2,FOXJ1,GADD45B,HLA-A,IFITM3,IFRD1,IGF1,IL6ST,ITGA3,JAG1,JUNB,JUND,KLF6,KRT7,KRT8,LTB,MFGE8,Mt2,NFKB2,NFKBIA,PLEC,RELB,S100A10,SPARC,SPP1,TGFB2,TGFB3,TMEM176B,TTR,ZFP36L1	70 (20)
beta-estradiol		chemical - endogenous mammalian		1.676		1.35e-16	AARS1,ACTB,ANXA3,APOE,BIRC3,BNIP2,C3,CCND2,CD44,CLDN4,COMT,DCLK1,GADD45B,HLA-A,IFRD1,IGF1,IL6ST,JAG1,JUNB,JUND,KLF6,KRT18,KRT19,KRT7,KRT8,LMNA,LTB,MYL12A,NFKB2,NFKBIA,NUPR1,Oasl2,PIGR,PPP1R1B,PTP4A1,SEMA3C,SET,SHISA4,SPARC,TGFB2,TGFB3,TTR,TUFT1	84 (19)
IKBKB		kinase		1.614	bias	2.03e-16	ANKRD1,BIRC3,C3,CD44,CSF1,CXCL16,HLA-A,ILK,JUNB,KRT18,KRT8,LTB,Mt2,NFKB2,NFKBIA,RELB,SEMA3C,TMEM176B,Tmsb4x (includes others)	63 (16)
TNF		cytokine	Activated	3.417	bias	2.04e-16	ACTB,APOBEC3B,APOE,BIRC3,C3,CCND2,CD44,CD47,CDC42EP5,CLDN4,CSF1,CXCL16,EFHD2,F11R,GADD45B,HLA-A,HSPG2,IGF1,JAG1,JUNB,JUND,KLF6,KRT18,KRT8,LTB,Mt2,NFKB2,NFKBIA,PDPN,PIGR,PLSCR1,RELB,S100A10,SAMD4A,SEMA3C,SPARC,SPP1,TGFB2,TGFB3,TMEM176B	69 (18)
NFKBIA	0.633	transcription regulator		0.665		2.41e-16	ANKRD1,BIRC3,C3,CCND2,CSF1,GADD45B,HLA-A,ITGA3,JUNB,KRT18,KRT8,MFGE8,Mt2,NFKB2,NFKBIA,RABEP1,RELB,RNF19A,SEMA3C,TGFB2,TMEM176B,Tmsb4x (includes others)	56 (14)
STAT6		transcription regulator		-1.517		1.51e-15	ACTB,AHNAK,AKAP13,APOE,Bst2,CCND2,EFHD2,FLRT2,GADD45B,Gm12854/S100a11,IFITM3,IGF1,IL6ST,JAG1,LTB,NFKBIA,PLSCR1,RNF213,S100A10,SAMD4A,TMEM176B	67 (15)
HRAS		enzyme		0.32	bias	1.95e-15	ACTB,ACTG1,ANKRD1,ANXA2,ANXA3,BIRC3,CCND2,CD44,CSF1,FLRT2,ILK,JUNB,KLF6,KRT18,KRT19,MFGE8,MYL12A,NFKBIA,SPARC,SPP1,TGFB2,TGFB3,Tmsb4x (includes others),Tpm1,Tpm4	67 (17)
nitrofurantoin		chemical drug	Activated	2.242		3.36e-15	ACTB,ACTG1,AMBP,ANXA2,APOE,C3,CES1,IFRD1,IGF1,KRT19,NFKBIA,S100A10,SPP1,TTR,TUBA1A
TP53		transcription regulator		1.964		2.06e-14	ACTB,ANKRD1,ANXA2,ANXA3,APOE,BIRC3,CCND2,CD44,CD47,COMT,CSF1,EZR,F11R,FLRT2,GADD45B,GPRC5C,HSPG2,IGF1,ILK,JUNB,JUND,KLF6,KRT18,KRT8,Mt2,NFKB2,NFKBIA,NUPR1,PTP4A1,SEMA3C,SPP1,TAGLN2,TGFB2,TGFB3,Tmsb4x (includes others),Tpm1,Tpm4,ZFP36L1	76 (16)
ESR1		ligand-dependent nuclear receptor		-0.696		8.37e-14	AHNAK,AKAP13,ANXA3,APOE,BIRC3,C3,CLDN4,COMT,DDX21,DSG2,GADD45B,IFITM3,IFRD1,IGF1,IL6ST,JAG1,JUNB,JUND,KRT19,KRT7,LTB,NFKB2,NFKBIA,RABEP1,RELB,SEMA3C,SPP1,TGFB2,TGFB3,Tmsb4x (includes others),TTR,WASF2	70 (15)
decitabine		chemical drug	Activated	3.55	bias	9.18e-14	ANKRD1,ANXA2,APOE,BIRC3,CCND2,CD44,COMT,DSG2,EZR,GADD45B,ITGA3,JAG1,JUNB,KLF6,KRT18,KRT7,KRT8,NFKBIA,RASSF3,S100A10,SEMA3C,SPARC,SPP1,TGFB2,Tpm1	68 (18)
forskolin		chemical toxicant		1.793	bias	1.23e-13	ACTB,AKAP13,CCND2,CD44,CSF1,EZR,GADD45B,GPRC5C,IGF1,ILK,ITGA3,JUNB,JUND,KRT18,MFGE8,Mt2,NFKBIA,PTP4A1,S100A10,SERINC2,SPP1,TAGLN2,Tpm4,TUBA1A	67 (15)
poly rI:rC-RNA		biologic drug	Activated	2.404	bias	6.29e-13	BIRC3,Bst2,C3,CCND2,CD44,CD47,CSF1,EZR,GADD45B,HLA-A,IFITM3,IGF1,JAG1,JUNB,KLF6,KRT19,LTB,NFKB2,NFKBIA,Oasl2,PIGR,RELB	63 (17)
estrogen receptor		group		0.886		8.24e-13	C3,CCND2,CD44,CLDN4,F11R,IGF1,ITGA3,JAG1,KRT18,KRT19,KRT7,KRT8,SPARC,TGFB2,TGFB3	76 (20)
IFNG		cytokine		1.767	bias	1.27e-12	ACTB,BIRC3,Bst2,C3,CCND2,CD44,CSF1,CXCL16,F11R,FLRT2,HLA-A,HSPG2,IFITM3,IGF1,JAG1,JUNB,JUND,KLF6,KRT19,LTB,NEURL3,NFKB2,NFKBIA,NUPR1,PIGR,PLSCR1,PPP1R1B,RELB,S100A10,SPP1,TGFB2	70 (20)
JUN		transcription regulator	Activated	2.656	bias	3.03e-12	ANXA2,APOE,BIRC3,C3,CCND2,CD44,COMT,CSF1,CXCL16,EZR,JUNB,LMNA,NFKB2,NFKBIA,RELB,S100A10,SPARC,SPP1,Tmsb4x (includes others)	68 (17)
IL1B		cytokine	Activated	3.093	bias	5.69e-12	APOE,BIRC3,C3,CD44,CSF1,GADD45B,HLA-A,HSPG2,IFRD1,IGF1,JUNB,JUND,KRT19,Mt2,NFKB2,NFKBIA,PIGR,PLSCR1,PTP4A1,RELB,S100A10,SPARC,SPP1,TGFB3,TMEM176B	56 (16)
SP600125		chemical - kinase inhibitor		-1.521		1.9e-11	APOBEC3B,APOE,CD2AP,CD44,CLDN4,CXCL16,DSG2,IGF1,ITGA3,JUNB,NUPR1,PLEC,PLSCR1,SPARC,SPP1	48 (9)
CHUK		kinase	Activated	2.384	bias	3.87e-11	C3,CSF1,GADD45B,HLA-A,JUNB,Mt2,NFKB2,NFKBIA,PLSCR1,RELB,SEMA3C,SPP1,TMEM176B	64 (14)
lipopolysaccharide		chemical drug	Activated	3.372	bias	4.13e-11	AKAP13,ANXA3,APOBEC3B,APOE,BIRC3,C3,CCND2,CD2AP,CD44,CSF1,CXCL16,GADD45B,HLA-A,IFRD1,IGF1,IL6ST,ITGA3,JAG1,JUNB,JUND,KLF6,Mt2,NFKB2,NFKBIA,NUPR1,PIGR,PLSCR1,RELB,RNF19A,SPARC,SPP1,TGFB2,TMEM176A,Tmsb4x (includes others)	68 (19)
IKBKG		kinase	Activated	3.227	bias	7.61e-11	BIRC3,C3,CSF1,HLA-A,JUNB,Mt2,NFKB2,NFKBIA,RELB,SEMA3C,TMEM176B	64 (15)
puromycin aminonucleoside		chemical reagent		0	bias	8.89e-11	ACTB,ACTG1,ANXA2,CD2AP,CD44,CLDN4,S100A10,SPP1,Tpm1,TTR
ERBB2		kinase		0.607	bias	1.39e-10	ACTB,AHNAK,ANXA2,ATP1B3,BCAM,BIRC3,BNIP2,CCND2,CD47,CES1,CHMP2B,CLDN4,DAAM1,DSG2,IL6ST,ILK,JAG1,JUNB,KRT7,NFKB2,SPARC,Tmsb4x (includes others),TUBA1A	32 (3)
progesterone		chemical - endogenous mammalian		0.428		2.14e-10	ACTB,APOE,BIRC3,C3,CES1,CLDN4,COMT,CSF1,EZR,IGF1,KRT7,NFKBIA,PDPN,PIGR,PPP1R1B,SPP1,TGFB2,TGFB3,TTR	71 (18)
MTPN		transcription regulator	Activated	2.203	bias	2.43e-10	CCND2,IGF1,LTB,S100A10,SPARC,SPP1,TGFB2,TGFB3,TUBA1A
NFkB (complex)		complex	Activated	3.896	bias	3.17e-10	ANKRD1,APOE,BIRC3,C3,CCND2,CD44,CSF1,GADD45B,HLA-A,JAG1,JUNB,KRT19,LTB,NFKB2,NFKBIA,RELB,RRAS,SPP1,TGFB3	65 (18)
F2		peptidase	Activated	2.92	bias	6.95e-10	BIRC3,CCND2,CD44,DAAM1,IGF1,JUNB,KLF6,NFKBIA,RELB,SAMD4A,TAGLN2,TGFB2,TGFB3	70 (20)
PDX1		transcription regulator	Activated	2.53		2.2e-09	ACTB,ACTG1,ANXA2,CD44,ILK,JUNB,KLF6,KRT18,KRT8,PTP4A1,SPP1
FOS		transcription regulator		1.63	bias	3.02e-09	ACTG1,C3,CD44,CXCL16,EZR,FLRT2,JUNB,KLF6,KRT8,Mt2,NFKB2,PDPN,PTP4A1,S100A10,SPP1,Tpm1,Tpm4	54 (9)
ESR2		ligand-dependent nuclear receptor		1.039		5.45e-09	APOE,C3,CES1,CLDN4,CXCL16,GADD45B,IGF1,JAG1,JUNB,KRT19,KRT8,LMNA,NFKB2,NFKBIA,PLEC,SPP1	59 (16)
APP		other		1.596	bias	6.12e-09	ACTB,ACTG1,APOE,C3,CCND2,CD44,CSF1,HSPG2,IGF1,IL6ST,ILK,ITGA3,JUNB,JUND,RNF213,SET,Tpm1,TTR,TUBA1A,TUBB2B,ZFP36L1	63 (15)
IL6		cytokine	Activated	3.745	bias	8.27e-09	AHNAK,APOE,C3,CD44,CES1,CSF1,GADD45B,HLA-A,IFITM3,IGF1,IL6ST,JUNB,JUND,KRT18,KRT8,Mt2,NFKBIA,SPP1,TTR	68 (20)
SMAD3		transcription regulator	Activated	2.19	bias	9.87e-09	ANKRD1,C3,CCND2,CES1,GADD45B,JAG1,JUNB,JUND,SPARC,SPP1,TGFB2,TGFB3	76 (22)
IgG		complex		-1.287	bias	1.13e-08	APOE,ATP1B3,C3,CCND2,CLDN4,CSF1,EZR,IFITM3,JUND,KRT18,PDPN	52 (9)
vancomycin		biologic drug		1.876	bias	1.15e-08	ANXA2,BIRC3,C3,CD44,CLDN4,S100A10,SPP1,Tpm1
IGF1	0.326	growth factor		1.898	bias	1.44e-08	BIRC3,CCND2,CD44,CSF1,DCLK1,IFITM3,IGF1,ITGA3,JUNB,KLF6,NFKBIA,NUPR1,PPP1R1B,SPP1,ZFP36L1	45 (15)
AGT		growth factor		1.256	bias	1.79e-08	ANXA3,C3,CCND2,CD44,HSPG2,IGF1,IL6ST,JAG1,NFKB2,NFKBIA,RRAS,SPP1,TAGLN2,TGFB2,TGFB3	52 (18)
Growth hormone		group		1.347	bias	1.95e-08	ACTB,APOE,C3,CCND2,COMT,IGF1,JUNB,NFKBIA,SPP1,TGFB3,TUBA1A	70 (19)
gentamicin C		chemical drug		1.89	bias	2.67e-08	ANXA2,BIRC3,CD44,CLDN4,S100A10,SPP1,Tpm1
lomustine		chemical drug		1.89	bias	2.98e-08	ANXA2,BIRC3,CD44,CLDN4,S100A10,SPP1,Tpm1
triamterene		chemical drug		1.89	bias	3.32e-08	ANXA2,BIRC3,CD44,CLDN4,S100A10,SPP1,Tpm1
DES		other				3.69e-08	ANKRD1,KRT18,KRT8,SPP1
IL1A		cytokine	Activated	2.102	bias	4.02e-08	BIRC3,C3,CD44,CSF1,HSPG2,IGF1,JUNB,NFKBIA,S100A10,SPARC,SPP1	71 (19)
cycloheximide		chemical reagent	Activated	2.82		4.07e-08	ACTB,BIRC3,CD44,CSF1,GADD45B,IGF1,JUNB,JUND,NFKBIA,PIGR,RELB,SPP1,Tpm4	66 (17)
KRAS		enzyme		-0.824		4.26e-08	AHNAK,BCAM,BIRC3,CD44,DCLK1,HSPG2,IFITM3,ILK,JUNB,KLF6,NFKB2,NFKBIA,Oasl2,PDPN,SPARC,SPP1,Tpm1,ZFP36L1	52 (12)
fenamic acid		chemical reagent	Activated	2.02	bias	4.55e-08	ANXA2,BIRC3,CD44,CLDN4,S100A10,SPP1,Tpm1
TGFBR2		kinase		-1.067		5.19e-08	CD44,DSG2,GADD45B,KRT18,KRT8,PDPN,SPARC,SPP1,TGFB2,TGFB3	69 (17)
phenacetin		chemical drug		1.633	bias	5.33e-08	ANXA2,BIRC3,CD44,CLDN4,S100A10,SPP1	43 (4)
RC3H1		enzyme	Inhibited	-2	bias	6.13e-08	ACTB,APOBEC3B,CD44,IFITM3,IL6ST,PLSCR1,SPP1	29 (5)
tetradecanoylphorbol acetate		chemical drug	Activated	3.118	bias	6.17e-08	ACTB,APOBEC3B,BIRC3,C3,CCND2,CD44,CES1,CSF1,EZR,GADD45B,IGF1,JUNB,JUND,KLF6,LTB,NFKB2,NFKBIA,PDPN,RELB,S100A10,SPARC,SPP1	74 (21)
E. coli B5 lipopolysaccharide		chemical - endogenous non-mammalian	Activated	2.525	bias	6.23e-08	BIRC3,CD44,CES1,HLA-A,IL6ST,JUNB,NFKBIA,SPP1,TGFB2,TGFB3,TTR	64 (18)
PSMB9		peptidase				6.62e-08	HLA-A,NFKB2,NFKBIA,RELB	50 (10)
SMARCA4		transcription regulator		1.087	bias	7.35e-08	AHNAK,CD44,CD47,CSF1,GADD45B,IFITM3,IGF1,ITGA3,KRT18,LMNA,MFGE8,NFKB2,PTP4A1,SPP1,TGFB2,TTR	55 (7)
NOTCH1		transcription regulator		1.396		8.15e-08	ANKRD1,BIRC3,CCND2,CD44,JAG1,KRT8,NFKB2,RELB,SPP1,TGFB2,TGFB3	67 (17)
MYC		transcription regulator		0.819	bias	8.73e-08	ACTB,CCND2,CD44,CD47,DDX21,EZR,GADD45B,HLA-A,ITGA3,KLF6,KRT7,Mt2,NFKBIA,Oasl2,PLSCR1,S100A10,SPARC,SPP1,TAGLN2,TGFB2,Tpm1,ZFP36L1	66 (18)
TNFSF11		cytokine	Activated	2.549	bias	8.79e-08	AKAP13,CD44,GADD45B,IFRD1,IGF1,JUNB,NFKB2,NFKBIA,RELB,RRAS,SPP1	48 (16)
MYD88		other	Activated	2.337	bias	9.83e-08	APOBEC3B,C3,CD44,HLA-A,IGF1,JAG1,NFKB2,NFKBIA,RELB,SLCO3A1,SPP1	68 (19)
OSM		cytokine		0.653	bias	1.02e-07	ANXA2,ANXA3,CCND2,CLDN4,HLA-A,IL6ST,JAG1,JUNB,KRT19,Mt2,PDPN,PIGR,PTP4A1,SPP1,TUBA1A	43 (9)
C11orf95-RELA		fusion gene/product	Activated	2.449	bias	1.07e-07	BIRC3,CD44,CSF1,NFKB2,NFKBIA,RELB
N4BP1		other		-1.214		1.1e-07	HLA-A,JUNB,NFKB2,RELB	40 (9)
S100P		other				1.1e-07	ACTB,KRT18,KRT19,KRT8
PD98059		chemical - kinase inhibitor		-1.028	bias	1.16e-07	ANKRD1,APOBEC3B,C3,CCND2,CD44,IGF1,JUNB,JUND,KRT19,KRT8,PLEC,S100A10,SPP1,TGFB3,ZFP36L1	65 (16)
carbon tetrachloride		chemical toxicant		0.818	bias	1.22e-07	APOE,DCLK1,GADD45B,IGF1,JUNB,JUND,Mt2,PTP4A1,SPP1,TGFB2	77 (20)
SP1		transcription regulator		0.946	bias	1.22e-07	APOE,CCND2,CES1,EZR,IFITM3,IGF1,KLF6,KRT18,KRT19,LTB,NFKBIA,RRAS,SPARC,SPP1,TGFB2	63 (16)
HNF1B		transcription regulator		-1.633		1.41e-07	AMBP,CD44,F11R,ITGA3,JAG1,SEMA3C,SPARC,TTR
PRL		cytokine		1.729	bias	1.41e-07	ACTB,ANXA2,ANXA3,KRT19,MFGE8,NUPR1,PDPN,PLSCR1,SPARC,SPP1,Tmsb4x (includes others)
D-glucose		chemical - endogenous mammalian		0.599	bias	1.44e-07	AARS1,ACTB,ANXA3,C3,CCND2,IGF1,IL6ST,ILK,JAG1,JUNB,Mt2,RELB,SPP1,TAGLN2,TGFB3,Tpm1	67 (18)
dihydrotestosterone		chemical - endogenous mammalian		1.993	bias	1.85e-07	ACTB,APOE,CCND2,Gm12854/S100a11,HLA-A,IGF1,IL6ST,JAG1,KRT19,NFKBIA,SLCO3A1,SPARC,SPP1,TGFB2,Tmsb4x (includes others)	66 (18)
ECSIT		transcription regulator	Activated	2.182	bias	1.87e-07	CD44,JUNB,NFKB2,NFKBIA,RELB	40 (11)
NFKB1		transcription regulator	Activated	2.377	bias	1.93e-07	ANKRD1,APOE,BIRC3,CCND2,CD44,CSF1,JAG1,LTB,NFKB2,NFKBIA,RELB	57 (14)
mycophenolic acid		chemical drug		1.89	bias	1.95e-07	BIRC3,CCND2,KRT19,MYL12A,NFKB2,SAMD4A,TUFT1
doxorubicin		chemical drug	Activated	2.191	bias	2.54e-07	ANXA2,BIRC3,CD44,CD47,CLDN4,JAG1,KRT18,KRT8,NFKBIA,S100A10,SPP1,TGFB3,Tpm1	67 (17)
MRTFA		transcription regulator	Activated	2.8		2.74e-07	ACTB,ACTG1,ANKRD1,COMT,F11R,HLA-A,LMNA,TGFB2,Tpm4	28 (5)
LY294002		chemical - kinase inhibitor	Inhibited	-2.314	bias	2.91e-07	APOE,BIRC3,CCND2,CD2AP,CD44,CLDN4,CXCL16,FLRT2,IGF1,JUNB,LMNA,NFKBIA,SEMA3C,SPP1	62 (19)
NR3C1		ligand-dependent nuclear receptor		0.747		2.98e-07	ACTB,APOE,BIRC3,CD47,COMT,GADD45B,IGF1,JUND,LTB,NFKB2,NFKBIA,PDPN,PIGR,RNF11,SEMA3C,SPP1	78 (21)
cisplatin		chemical drug		1.88	bias	3.1e-07	ACTB,ANKRD1,ANXA2,BIRC3,CD44,CLDN4,CSF1,F11R,IL6ST,JUND,KRT19,LMNA,NFKBIA,S100A10,SPP1,Tmsb4x (includes others),Tpm1	59 (18)
ERK1/2		group		1.23	bias	3.19e-07	BIRC3,C3,CCND2,CD44,CDC42EP5,EZR,HLA-A,ITGA3,JUNB,JUND,SPP1	64 (17)
IL33		cytokine		1.372	bias	3.57e-07	ACTB,APOE,BIRC3,CXCL16,GADD45B,JAG1,JUNB,NFKB2,NFKBIA,RELB	66 (17)
crocidolite asbestos		chemical toxicant		1.362	bias	3.87e-07	CD44,ILK,JUNB,JUND,SPP1	34 (7)
CALCA		other		-0.378	bias	3.9e-07	AHNAK,AKAP13,CD44,IGF1,JUNB,LMNA,PPP1R1B	32 (7)
EGF		growth factor		1.537	bias	4.08e-07	CCND2,CD44,EZR,FOXJ1,IGF1,JUNB,JUND,KRT19,PDPN,PLSCR1,S100A10,SPARC,SPP1,TGFB3	56 (16)
methapyrilene		chemical drug	Activated	2.121		4.09e-07	ACTG1,AMBP,ANXA2,APOE,CES1,IFRD1,IGF1,TTR
IL11		cytokine		1.067		4.28e-07	ANXA2,EZR,IGF1,IL6ST,JUNB,SPP1	48 (8)
Ifnar		group	Activated	2.573	bias	4.51e-07	APOBEC3B,Bst2,C3,HLA-A,IFITM3,RNF213,SPP1	30 (4)
thioacetamide		chemical toxicant	Activated	2.107	bias	4.62e-07	ANXA2,BIRC3,CD44,CLDN4,IGF1,S100A10,SPARC,SPP1,TGFB3,Tpm1	67 (13)
RELA		transcription regulator	Activated	2.608	bias	4.85e-07	ANKRD1,APOE,BIRC3,C3,CD44,IGF1,JUNB,KRT18,KRT8,LTB,NFKB2,NFKBIA,RELB	64 (13)
SB203580		chemical - kinase inhibitor		-0.665	bias	4.85e-07	ANXA3,APOBEC3B,C3,CD2AP,CD47,JUNB,JUND,NFKB2,S100A10,SPARC,SPP1,TGFB2,TGFB3	72 (22)
CSF1	0.317	cytokine		1.282	bias	5.14e-07	APOE,CCND2,CSF1,HLA-A,IGF1,IL6ST,JUNB,NFKB2,SPARC,SPP1	66 (20)
HOXA4		transcription regulator		-1.057		5.16e-07	ANKRD1,CCND2,TAGLN2,TGFB2
allopurinol		chemical drug		1.89	bias	5.19e-07	ANXA2,BIRC3,CD44,CLDN4,S100A10,SPP1,Tpm1
ACOX1		enzyme	Inhibited	-2.121		5.65e-07	ANXA2,IGF1,KLF6,KRT8,MFGE8,NUPR1,PLSCR1,TAGLN2
CYP1A1		enzyme				5.96e-07	ANXA3,IGF1,KRT19,KRT7,LMNA,Mt2,PTP4A1
TP63		transcription regulator		1.116	bias	6.76e-07	APOBEC3B,CCND2,F11R,ITGA3,JAG1,JUNB,KLF6,KRT7,MFGE8,RELB,TGFB2,TGFB3,TUBB2B
Ige		complex	Activated	2.373	bias	6.92e-07	C3,CCND2,CDC42EP5,CXCL16,GADD45B,JUNB,NFKB2,NFKBIA,RELB,SPP1,Tpm1	67 (17)
SU6656		chemical toxicant	Inhibited	-2	bias	7.27e-07	CSF1,JUNB,KRT8,Mt2,ZFP36L1
INHA		growth factor		0.87		8.3e-07	CCND2,F11R,ITGA3,KRT18,KRT19,KRT8,LMNA
JUNB	0.597	transcription regulator		1.109	bias	8.5e-07	C3,CD44,COMT,CXCL16,JUNB,MYL12A,NFKB2,RELB	58 (10)
tretinoin		chemical - endogenous mammalian		1.159	bias	8.68e-07	AHNAK,ANXA2,APOE,ATP1B3,BIRC3,C3,CCND2,CD44,CD47,CES1,HLA-A,IGF1,IL6ST,KRT18,KRT19,KRT7,PLSCR1,PPP1R1B,RNF213,S100A10,SPARC,SPP1,TGFB2,TGFB3	66 (17)
FOXO3		transcription regulator		0.612		8.99e-07	ANXA3,BNIP2,CCND2,GADD45B,IGF1,JAG1,JUNB,Mt2,NFKBIA,NUPR1,TGFB2	50 (8)
ID2		transcription regulator		0.896		1.06e-06	CCND2,CD44,CSF1,GADD45B,ITGA3,KLF6,LTB,RELB,TUBA1A
bisindolylmaleimide I		chemical - kinase inhibitor	Inhibited	-2.613	bias	1.29e-06	BIRC3,CCND2,CD44,IGF1,JUND,NFKBIA,TGFB3	53 (14)
PGR		ligand-dependent nuclear receptor	Activated	2.067	bias	1.32e-06	AKAP13,BIRC3,CD44,COMT,DDX21,EZR,KRT18,NFKBIA,PTP4A1,TGFB3	43 (4)
ABL1		kinase	Activated	2.152	bias	1.45e-06	C3,CCND2,CSF1,TGFB2,TGFB3	67 (14)
resiquimod		chemical drug				1.45e-06	APOBEC3B,C3,CD44,IFITM3,LMNA,NFKB2,NFKBIA,PLSCR1,RELB,SPP1	67 (17)
camptothecin		chemical drug		1.89	bias	1.62e-06	ANXA2,APOE,BIRC3,CD47,CSF1,GADD45B,HLA-A,NFKB2,NFKBIA,PLEC,PTP4A1,SPP1,TAGLN2,ZFP36L1	62 (18)
TWIST1		transcription regulator		0.431	bias	1.64e-06	C3,CD44,CLDN4,LMNA,MFGE8,RELB,SPP1,TGFB2	29 (7)
miR-199a-5p (and other miRNAs w/seed CCAGUGU)		mature microRNA		-1.671	bias	1.8e-06	BCAM,C3,ITGA3,JAG1,PIGR,SET
MRTFB		transcription regulator	Activated	2.621	bias	1.8e-06	ACTB,ACTG1,ANKRD1,F11R,HLA-A,LMNA,TGFB2,Tpm4	11 (3)
STAT1		transcription regulator	Activated	2.138	bias	1.84e-06	APOBEC3B,APOE,C3,CCND2,IFITM3,IGF1,NEURL3,Oasl2,PLSCR1,RNF213,S100A10	37 (5)
CSF2		cytokine	Activated	2.455	bias	1.9e-06	BIRC3,C3,CCND2,CSF1,IFITM3,IFRD1,IGF1,JUNB,LTB,NFKB2,NFKBIA,RELB,SPP1	55 (16)
raloxifene		chemical drug		-0.314		1.96e-06	ANXA3,CSF1,IGF1,KLF6,KRT7,SPP1,TGFB2,TGFB3	47 (8)
Tgf beta		group		1.756	bias	1.97e-06	CCND2,CSF1,GADD45B,HSPG2,IGF1,ILK,JAG1,JUNB,SPARC,SPP1	68 (17)
AKT1		kinase		1.577	bias	2.03e-06	ANKRD1,BIRC3,CCND2,CD44,EZR,JUND,NFKB2,PPP1R1B,SPP1,TGFB2	63 (19)
captopril		chemical drug		0		2.1e-06	CD44,S100A10,SPP1,TGFB2,TGFB3,Tpm1	52 (7)
U0126		chemical - kinase inhibitor		-1.573	bias	2.19e-06	BIRC3,C3,CCND2,CD44,CLDN4,GADD45B,ITGA3,JAG1,JUNB,JUND,SPP1,TGFB2,TGFB3	48 (16)
FAS		transmembrane receptor		-0.914		2.32e-06	ANXA2,BIRC3,CD44,CSF1,JUND,LTB,NFKBIA,PLEC,PTP4A1,SPP1,TAGLN2	70 (20)
BIRC3	0.36	enzyme				2.44e-06	BIRC3,CSF1,NFKB2,NFKBIA	58 (16)
MYB		transcription regulator		-0.342	bias	2.76e-06	BIRC3,C3,CXCL16,FOXJ1,IGF1,NEURL3,NFKB2,SPP1	27 (4)
MAP3K14		kinase	Activated	2.2	bias	2.83e-06	BIRC3,CD44,LTB,NFKB2,NFKBIA,RELB	40 (12)
indomethacin		chemical drug		1.948	bias	2.93e-06	ANXA2,BIRC3,CD44,CLDN4,IFITM3,IGF1,KRT8,S100A10,SPP1	63 (18)
diethylstilbestrol		chemical drug		0.977	bias	2.98e-06	AMBP,C3,DCLK1,HLA-A,IGF1,MFGE8,PIGR,SHISA4,SPARC,TGFB3
2-mercaptoacetate		chemical drug				3.01e-06	ANXA2,IGF1,MFGE8,S100A10
TLR4		transmembrane receptor	Activated	2.602	bias	3.22e-06	APOBEC3B,C3,CCND2,CD44,IFITM3,JAG1,NFKB2,NFKBIA,RELB,SLCO3A1,SPP1	47 (14)
4-hydroxytamoxifen		chemical drug		1.892	bias	3.26e-06	C3,CLDN4,DDX21,IGF1,JUNB,KRT19,NFKBIA,TUFT1	53 (11)
SOX2		transcription regulator		-1.22		3.74e-06	CD44,GADD45B,IGF1,JAG1,KLF6,KRT18,KRT19,KRT7,NFKB2,Oasl2,TGFB2,TGFB3	15 (2)
Lh		complex	Inhibited	-2.449		3.95e-06	ACTB,CCND2,EZR,ILK,ITGA3,KRT18,PTP4A1,TGFB2,TUBA1A
maslinic acid		chemical - endogenous non-mammalian				4.01e-06	CCND2,CD44,CD47,IL6ST,ITGA3,JUNB
LTBR		transmembrane receptor		1	bias	4.05e-06	DSG2,MFGE8,NFKB2,NFKBIA,PDPN	25 (7)
2-bromoethylamine		chemical reagent		1.342	bias	4.05e-06	ANXA2,CD44,CLDN4,S100A10,SPP1
CD40LG		cytokine	Activated	2.593	bias	4.2e-06	AKAP13,BIRC3,CD44,CSF1,JUNB,JUND,LTB,NFKB2,NFKBIA,RELB,ZFP36L1	37 (12)
RB1		transcription regulator		1.247		4.25e-06	ACTB,CD44,EZR,GPRC5C,IFITM3,IGF1,KRT18,NFKB2,NFKBIA,TGFB2,Tpm1,TUBA1A	63 (19)
PRKCD		kinase	Activated	2.762	bias	4.3e-06	BIRC3,CXCL16,JUNB,KLF6,NFKB2,NFKBIA,PLSCR1,RELB	66 (18)
FSH		complex		-0.183		4.62e-06	ACTB,CCND2,EZR,ILK,ITGA3,JUNB,KRT18,PTP4A1,TGFB2,Tpm4,TUBA1A
BDNF		growth factor		-0.412	bias	4.9e-06	ANXA2,CCND2,IFRD1,PPP1R1B,S100A10,SPARC,SPP1,TGFB2,Tmsb4x (includes others),TUBA1A	50 (6)
PDGF BB		complex		1.957	bias	5.03e-06	C3,CD44,CSF1,IGF1,JUNB,KLF6,LMNA,Mt2,TGFB3,ZFP36L1	69 (16)
APOE	-0.399	transporter		0	bias	5.31e-06	ACTB,APOE,BCAM,CCND2,CD44,CSF1,HSPG2,IGF1,ITGA3,SPP1	67 (19)
GDF2		growth factor		1.408	bias	5.58e-06	ANXA3,GADD45B,IGF1,NFKBIA,SEMA3C,SPP1	9 (3)
SOD1		enzyme				5.95e-06	ACTB,APOE,COMT,EZR,IGF1,JUNB,Mt2,SPP1,Tmsb4x (includes others)	68 (18)
HGF		growth factor		1.828	bias	6.04e-06	AKAP13,BIRC3,CD44,CSF1,DDX21,IGF1,IL6ST,KRT18,KRT19,SPP1,TAGLN2,TGFB2	61 (18)
trichostatin A		chemical drug		0.623		6.96e-06	ACTB,ANKRD1,APOE,CCND2,CD44,DSG2,EZR,JUND,LMNA,NFKB2,NFKBIA,RASSF3,RELB,S100A10,SEMA3C,SPP1	61 (19)
deferoxamine		chemical drug		-0.216	bias	7.25e-06	ANXA2,CCND2,CD47,GADD45B,IGF1,NFKB2,SPP1,TGFB2	65 (20)
FGF2		growth factor		1.433	bias	7.29e-06	CCND2,CSF1,IGF1,ITGA3,JUNB,LMNA,S100A10,SPARC,SPP1,TGFB2,Tmsb4x (includes others)	61 (19)
TAF4B		transcription regulator				7.37e-06	CCND2,NFKBIA,SPP1,TGFB3
ciprofibrate		chemical drug		0.817		7.51e-06	ANXA2,CCND2,IGF1,KRT8,NFKBIA,PLSCR1,TAGLN2	20 (3)
RNA polymerase II		complex				8.27e-06	ACTB,CCND2,CSF1,GADD45B,IGF1,JUNB,NFKBIA,SPP1,Tmsb4x (includes others)	52 (9)
AR		ligand-dependent nuclear receptor		0.263	bias	8.46e-06	ANKRD1,C3,DSG2,IGF1,NUPR1,PIGR,RASSF3,SLCO3A1,SPP1,TGFB2,TMEM176A,TMEM176B	16 (4)
hexachlorobenzene		chemical toxicant		1.342	bias	8.61e-06	ANXA2,CD44,S100A10,SPP1,Tpm1
CD44	0.307	other		0.968	bias	8.96e-06	ACTB,BCAM,BIRC3,CCND2,CD44,ITGA3,NFKB2,SPP1	54 (19)
GLI1		transcription regulator		1.67	bias	9.28e-06	CCND2,CD44,CSF1,EZR,IGF1,KRT19,LMNA,SPP1	43 (8)
SFN		other		1.192	bias	1e-05	DSG2,KRT18,KRT8,PPP1R1B
Pdgf (complex)		complex		1.493	bias	1.02e-05	CCND2,CD44,JAG1,JUNB,SPARC,TGFB3	68 (18)
phenylbutazone		chemical drug		1.172	bias	1.11e-05	ANXA2,CD44,CLDN4,S100A10,SPP1
17-alpha-ethinylestradiol		chemical drug		1.633	bias	1.11e-05	AARS1,APOE,C3,IGF1,KRT19,KRT7,TGFB3	66 (12)
Pam3-Cys-Ser-Lys4		chemical reagent	Activated	2.2	bias	1.16e-05	AKAP13,HLA-A,LTB,NFKBIA,RELB,TGFB2,TGFB3	41 (7)
MYCN		transcription regulator	Inhibited	-2.8		1.16e-05	ACTB,ACTG1,CCND2,HLA-A,ITGA3,MYL12A,RNF11,S100A10,SPARC
methylprednisolone		chemical drug		0.317		1.19e-05	ANXA2,ANXA3,CD44,COMT,IGF1,IL6ST,KRT19,PIGR,RABEP1,SPARC,Tpm1,ZFP36L1
TNFRSF8		transmembrane receptor		1.387		1.21e-05	AHNAK,JUNB,NFKB2,PDPN,RELB
estrogen		chemical drug		0.349	bias	1.23e-05	APOE,COMT,IGF1,JUNB,SPARC,SPP1,TGFB2,TGFB3,Tmsb4x (includes others)	73 (20)
Igkv1-117		other				1.32e-05	CCND2,JUNB,RELB	40 (8)
IL2		cytokine	Activated	2.927	bias	1.33e-05	BIRC3,C3,CCND2,CD44,CD47,CSF1,DDX21,DSG2,GADD45B,JUND,KLF6,LTB,SPP1	59 (15)
caffeic acid phenethyl ester		chemical drug		-1.698	bias	1.35e-05	BIRC3,CD44,KLF6,NFKB2,NFKBIA,RELB	45 (14)
OSMR		transmembrane receptor				1.41e-05	BIRC3,IL6ST,JUNB,Mt2,Oasl2
Interferon alpha		group	Activated	2.85	bias	1.44e-05	APOBEC3B,Bst2,C3,CCND2,HLA-A,IFITM3,IL6ST,NFKBIA,Oasl2,PLSCR1,RNF213	46 (11)
EIF2AK3		kinase				1.58e-05	AARS1,BIRC3,IGF1,NFKB2,NUPR1,RELB
tributyrin		chemical drug	Activated	2.236	bias	1.65e-05	BIRC3,MYL12A,NFKB2,SAMD4A,TUFT1
FOXA2		transcription regulator		1.664		1.73e-05	C3,CLDN4,EFHD2,GPRC5C,IGF1,ITGA3,NFKB2,TTR
ALDH1A2		enzyme		-1	bias	1.73e-05	CD44,CSF1,SPARC,SPP1
Ap1		complex				1.73e-05	CD44,EZR,IFRD1,IGF1,KRT18,RELB,SPARC
MBD2		transcription regulator		1.067		1.78e-05	ACTB,APOE,BIRC3,NUPR1,RELB
Akt		group		0.659	bias	1.8e-05	ANKRD1,BCAM,CCND2,CD44,HSPG2,IGF1,LMNA,NFKBIA,PPP1R1B,SPP1	58 (18)
tetrachlorodibenzodioxin		chemical toxicant		-0.791		1.8e-05	AARS1,CES1,COMT,JAG1,JUND,KRT19,KRT7,SLCO3A1,TGFB2,TGFB3	51 (11)
MAPT		other				1.84e-05	AARS1,ACTB,ACTG1,C3,NFKB2,PLEC,PPP1R1B,Tpm1,TUBA1A,TUBB2B	27 (3)
ARHGAP31		other	Inhibited	-2		1.97e-05	GADD45B,SPARC,TGFB2,TGFB3
WT1		transcription regulator				2.02e-05	CD2AP,CSF1,EZR,HSPG2,IGF1,JUNB,JUND,TGFB3
ERBB3		kinase		0.186		2.14e-05	ACTB,CCND2,CD47,EZR,RRAS,SPARC
ABCB4		transporter		-1.029	bias	2.22e-05	NFKB2,SPARC,SPP1,TGFB2
gentamicin C1		chemical drug				2.36e-05	CD44,SPP1
Rps15a-ps4		other				2.36e-05	NFKB2,NFKBIA
KRT18	0.343	other				2.36e-05	KRT18,KRT7
calcitriol		chemical drug		0.284		2.43e-05	ANXA2,BNIP2,C3,CES1,COMT,CSF1,IGF1,NFKBIA,NUPR1,SPP1,TAGLN2,TGFB2	67 (19)
BMP7		growth factor				2.44e-05	CD44,F11R,IGF1,ILK,JAG1,SPP1,TGFB3
PSEN1		peptidase		0		2.44e-05	ACTB,ACTG1,APOE,C3,GADD45B,IGF1,NUPR1,Tpm1,TUBA1A,TUBB2B	24 (3)
CSF3		cytokine		0.956		2.53e-05	BIRC3,CCND2,CD44,GADD45B,IGF1,LTB,PLSCR1	62 (14)
EZH2		transcription regulator		0.87		2.6e-05	ACTB,BIRC3,C3,CCND2,EZR,FOXJ1,IGF1,LTB,NFKBIA,TGFB2	50 (13)
methotrexate		chemical drug		1.89		2.65e-05	ACTB,ACTG1,C3,CES1,CSF1,SPP1,TTR,ZFP36L1	48 (7)
HOXA9		transcription regulator				2.72e-05	AKAP13,IGF1,JUNB,KRT18,SERINC2,SPP1,Tmsb4x (includes others)
miR-450a-5p (and other miRNAs w/seed UUUGCGA)		mature microRNA		-1	bias	2.8e-05	ILK,JAG1,SPP1,TGFB2
GTF2B		transcription regulator				2.8e-05	ACTB,CCND2,IGF1,NFKBIA	39 (5)
gentamicin		chemical drug		0.827		2.81e-05	IFRD1,JUNB,KLF6,NEURL3,PTP4A1,SPP1,TTR,ZFP36L1
SB-431542		chemical reagent		-0.816		2.86e-05	CD44,GADD45B,IGF1,KRT18,SPP1,TGFB2
trans-hydroxytamoxifen		chemical drug		-1.89		3.03e-05	ANXA3,APOE,KLF6,KRT7,LMNA,TGFB2,TGFB3
POLR3G		enzyme				3.12e-05	EZR,KLF6,LMNA
acetaminophen		chemical drug		1.89	bias	3.25e-05	ACTB,ACTG1,CES1,IFRD1,IGF1,TTR,TUBA1A
GNAQ		enzyme				3.28e-05	ANKRD1,ANXA3,CD44,PLSCR1,TGFB2,ZFP36L1
RELB	0.434	transcription regulator				3.31e-05	BIRC3,LTB,NFKB2,NFKBIA,RELB	40 (9)
SPP1	-0.277	cytokine		-0.648	bias	3.36e-05	CD44,IGF1,ILK,ITGA3,JAG1,KRT18,SPP1	60 (17)
CP-55940		chemical reagent				3.48e-05	ACTB,CSF1,JUNB,NFKBIA
FGF1		growth factor	Inhibited	-2.34		3.59e-05	APOE,LTB,SPP1,TGFB2,TGFB3,TTR
SOX4		transcription regulator		1.912	bias	3.73e-05	Gm12854/S100a11,IGF1,TMEM176B,Tmsb4x (includes others),Tpm4,TUBA1A,TUBB2B
ethionine		chemical toxicant		1	bias	3.86e-05	CD44,S100A10,SPP1,Tpm1
EGR1		transcription regulator		1.951	bias	3.99e-05	CCND2,CD44,CSF1,GADD45B,JUNB,JUND,SPP1	77 (23)
IRAK4		kinase				4e-05	BIRC3,CXCL16,IFRD1,NFKBIA,PLSCR1	39 (8)
OGA		enzyme		0.102		4.1e-05	ACTG1,APOE,BNIP2,CD44,CD47,CXCL16,DCLK1,IGF1,IL6ST,TUBA1A
PLX5622		chemical drug		1.342	bias	4.26e-05	ACTB,CSF1,IL6ST,LTB,SPP1
MET		kinase		1.969	bias	4.47e-05	CCND2,CD44,IGF1,ITGA3,SLCO3A1,SPP1	44 (17)
C3	0.55	peptidase		1.964	bias	4.52e-05	APOE,C3,CSF1,CXCL16,TTR	64 (11)
WNT1		cytokine		0.277	bias	4.66e-05	CCND2,IGF1,JUNB,KRT19,SEMA3C,SPP1	40 (7)
RNASEH2A		enzyme				4.72e-05	DDX21,IFITM3,NFKB2,NFKBIA
PPP3CA		phosphatase				4.8e-05	C3,KRT18,KRT8,PDPN,SPP1
S-nitrosoglutathione		chemical toxicant				5.2e-05	BIRC3,IGF1,NFKBIA,S100A10	32 (7)
SRF		transcription regulator	Activated	2.408	bias	5.27e-05	ACTB,ACTG1,ANKRD1,EZR,HSPG2,IGF1,JUNB,Tpm1,Tpm4	37 (7)
CX3CL1		cytokine		1.067		5.29e-05	CSF1,IGF1,MFGE8,SPP1,TGFB2,TGFB3	50 (7)
CEBPB		transcription regulator		0.907	bias	5.29e-05	C3,CCND2,HLA-A,IFITM3,IGF1,KRT18,NUPR1,SPP1,TMEM176A,TMEM176B	57 (13)
ID3		transcription regulator		1		5.53e-05	CCND2,CD44,CSF1,GADD45B,KLF6,LTB,RELB
VHL		transcription regulator				5.74e-05	CLDN4,IFITM3,LMNA,MYL12B,SPARC,ZFP36L1
IL1		group	Activated	2.069	bias	5.76e-05	APOE,C3,CSF1,IGF1,KLF6,PIGR,RELB,SPARC,TGFB3	78 (20)
NTF4		growth factor				6.04e-05	SPARC,SPP1,TUBA1A
CDH1		other		0.277		6.06e-05	ACTB,CD44,KRT18,KRT19,KRT7
3,4,5,3',4'-pentachlorobiphenyl		chemical toxicant		1.486	bias	6.06e-05	CCND2,CD44,CES1,COMT,SLCO3A1
Sos		group				6.08e-05	CD44,FLRT2,KLF6,Mt2,PDPN,Tpm1,Tpm4	53 (7)
IRF3		transcription regulator		1.276	bias	6.08e-05	AHNAK,APOBEC3B,BIRC3,Bst2,IFITM3,JUNB,Oasl2	30 (5)
wortmannin		chemical - kinase inhibitor		-1.767	bias	6.47e-05	CCND2,CD44,CSF1,CXCL16,EZR,IGF1,NFKBIA	55 (15)
butyric acid		chemical - endogenous mammalian		-1.98		6.52e-05	ANXA2,CCND2,CD44,CSF1,HSPG2,NFKB2,NFKBIA,PLSCR1,SPP1,ZFP36L1	63 (18)
mir-297		microRNA				7.05e-05	CCND2,JUNB
miR-29b-3p (and other miRNAs w/seed AGCACCA)		mature microRNA	Inhibited	-2.19	bias	7.15e-05	PLEC,SPARC,TGFB3,Tpm1,ZFP36L1
Pka		complex		0.128	bias	7.28e-05	APOE,CD44,IGF1,JUNB,KLF6,PPP1R1B	64 (19)
DNAJB6		transcription regulator				7.31e-05	KRT18,SPARC,SPP1
triamcinolone acetonide		chemical drug		-0.378		7.53e-05	AKAP13,CD44,IL6ST,JUNB,NFKBIA,SPP1,TGFB2
ERG		transcription regulator		0.659	bias	7.53e-05	BIRC3,DAAM1,ILK,RRAS,SPARC,SPP1,Tpm1
NCOA3		transcription regulator		1.536	bias	7.55e-05	ANKRD1,IGF1,ILK,NFKBIA,TGFB2	31 (6)
FADD		other		-1.342	bias	7.55e-05	BIRC3,CCND2,GADD45B,JUNB,KLF6	41 (7)
CG		complex		1.024	bias	7.6e-05	ACTB,CCND2,HLA-A,IGF1,JUNB,Oasl2,S100A10,SPP1,TGFB2	36 (7)
STAT5B		transcription regulator		1.219		8.11e-05	AHNAK,ANKRD1,BIRC3,CCND2,GADD45B,IGF1,KRT19,LTB	41 (9)
hydrocortisone		chemical - endogenous mammalian		-0.114		8.17e-05	ANKRD1,CCND2,EZR,GADD45B,IGF1,NFKBIA	64 (12)
FN1		enzyme		-0.714	bias	8.48e-05	APOE,BIRC3,JUND,KRT7,NFKBIA,SPARC,SPP1	57 (19)
LDB1		transcription regulator		0		8.51e-05	ACTB,CCND2,CLDN4,COMT,MFGE8,Oasl2,PLSCR1,TGFB2
LMO2		transcription regulator		0		8.72e-05	ACTB,CCND2,CLDN4,COMT,MFGE8,Oasl2,PLSCR1,TGFB2
VGLL3		other				8.73e-05	ANKRD1,GADD45B,SPP1
ADAM10		peptidase				8.84e-05	CSF1,CXCL16,DCLK1,IL6ST,RABEP1
Tnf (family)		group		0.343	bias	9.14e-05	BIRC3,CLDN4,CSF1,IGF1,JAG1,NFKBIA	56 (10)
TCR		complex		1.48	bias	9.15e-05	APOE,BIRC3,CD44,GADD45B,JUNB,NFKB2,NFKBIA,RELB,SPP1	60 (17)
desmopressin		biologic drug		-1	bias	9.79e-05	ACTB,AHNAK,LMNA,PPP1R1B,PSMD11
LIF		cytokine		-0.16		9.8e-05	AHNAK,IGF1,IL6ST,JUNB,SPP1,TMEM176A,TMEM176B	29 (7)
TMSB4		group				0.000103	ILK,ITGA3,SPP1
MNT		transcription regulator				0.000103	CCND2,GADD45B,KLF6
NLRX1		other	Inhibited	-2	bias	0.000104	BIRC3,NFKB2,NFKBIA,RELB	58 (15)
Hedgehog		group				0.000104	CCND2,JAG1,KRT19,SPP1
RBPJ		transcription regulator	Inhibited	-2.2	bias	0.000106	CD44,CSF1,IGF1,JAG1,TGFB2,TGFB3	67 (12)
PI3K (complex)		complex	Activated	2.219	bias	0.00011	BIRC3,CCND2,CD44,IGF1,NFKB2,NFKBIA,PPP1R1B,SPP1	53 (17)
SNAI1		transcription regulator		-0.537		0.000114	ANKRD1,CCND2,CLDN4,KRT18,KRT8,SPARC	42 (7)
eicosapentenoic acid		chemical drug		1.067		0.000119	APOE,CD44,IGF1,TGFB2,TGFB3	39 (7)
NR1H3		ligand-dependent nuclear receptor		-0.334		0.000119	APOE,Bst2,CD47,CXCL16,MFGE8,Mt2,NFKBIA
inosine		chemical - endogenous mammalian		1.969	bias	0.000121	ANXA2,C3,IFITM3,TUBA1A
CCN5		growth factor		0		0.000121	CD44,KRT18,KRT8,SPARC
EML4-ALK		fusion gene/product				0.000121	PTP4A1,SPARC,TGFB3
Nr1h		group		-1.673	bias	0.000122	APOE,C3,CCND2,CSF1,LTB,NFKB2	43 (10)
BCL6		transcription regulator		-1.276	bias	0.000123	CCND2,CD44,CSF1,ITGA3,JUNB,KLF6,LMNA	61 (12)
ETV5		transcription regulator				0.000125	AHNAK,CLDN4,KRT19,KRT7,SPP1
Immunoglobulin		complex		1.892		0.000126	BIRC3,CCND2,CD44,CSF1,CXCL16,FOXJ1,HLA-A,NFKB2,NFKBIA,PLSCR1,RELB,SPP1	65 (17)
KLF4		transcription regulator		0.907	bias	0.000129	CCND2,CD44,IFITM3,KRT19,KRT7,Oasl2,TGFB2,TGFB3	44 (7)
paclitaxel		chemical drug		1.228	bias	0.000132	BIRC3,CD44,CD47,GADD45B,HLA-A,ITGA3,JUND,NFKBIA	66 (19)
arzoxifene		chemical drug				0.000141	IGF1,TGFB3
VCAN		other		0.64		0.00015	APOE,C3,ITGA3,NFKBIA,TGFB3,Tpm1
Nfat (family)		group	Activated	2.236	bias	0.000151	DAAM1,KLF6,RELB,SAMD4A,TGFB2
TAZ		enzyme				0.000151	ANKRD1,CD44,KLF6,SAMD4A,SEMA3C
carboplatin		chemical drug		1.109	bias	0.000151	CD44,CD47,CLDN4,SPP1	21 (5)
MAPK9		kinase		0.896	bias	0.000155	BIRC3,GADD45B,JUNB,JUND,KLF6,LMNA	43 (12)
PPARG		ligand-dependent nuclear receptor		0.123	bias	0.000159	APOE,C3,CES1,F11R,Gm12854/S100a11,IGF1,KLF6,KRT18,KRT19,SPP1	47 (14)
ADCYAP1		other		-1.134		0.00016	BCAM,KRT8,NFKBIA,S100A10,SPARC,TGFB2,TUBB2B
PARPBP		other				0.000163	KRT18,KRT7,KRT8
EIF4G2		translation regulator				0.000163	ACTB,CCND2,KRT19
ETV6-RUNX1		fusion gene/product		-1.499	bias	0.000165	Bst2,CD44,JUND,KLF6,LTB,RELB,RRAS,SPP1
glutamine		chemical - endogenous mammalian		-1	bias	0.000165	AARS1,ACTB,JUNB,NFKB2,NFKBIA	16 (3)
PTEN		phosphatase	Activated	2.534		0.000167	C3,CD44,GPRC5C,IFRD1,IGF1,JAG1,JUND,KLF6,KRT19,PLEC,SPP1,Tmsb4x (includes others)	30 (5)
prostaglandin E2		chemical - endogenous mammalian		1.169	bias	0.000168	ANXA2,BIRC3,CD44,CSF1,IGF1,LMNA,NFKBIA,SPP1	61 (20)
VDR		transcription regulator		0.07		0.000169	CCND2,CD44,CSF1,NUPR1,RELB,SPP1,TGFB2	57 (19)
CCN2		growth factor	Activated	2.2	bias	0.000173	CD44,IGF1,ILK,SPARC,Tpm1	50 (8)
NCOR2		transcription regulator				0.000173	BIRC3,C3,IGF1,RELB	46 (9)
Pln		other				0.000173	ACTB,ANXA2,EZR,RRAS
EGFR		kinase		-0.82	bias	0.000175	ACTB,BCAM,CD47,DSG2,IGF1,JAG1,JUNB,JUND,NFKBIA,RRAS	45 (4)
PTK2		kinase				0.000186	BIRC3,KRT18,KRT8,SPP1
MGP		other				0.000186	JAG1,SPP1,TTR	14 (3)
Mapk		group				0.000188	CLDN4,IGF1,JUNB,PIGR,SPP1	46 (8)
PTH		other		-0.206	bias	0.000194	AHNAK,CSF1,IGF1,LMNA,PPP1R1B,SPP1	51 (13)
FOXO4		transcription regulator		0.776		0.000205	ANXA3,CCND2,GADD45B,JAG1,PSMD11
SIRT1		transcription regulator		-1.942	bias	0.000207	ACTB,BIRC3,CCND2,HLA-A,IFITM3,IGF1,Oasl2,RELB,RNF213	45 (7)
BNIP3L		other		-0.577		0.000212	CD47,LTB,NFKB2,NFKBIA	32 (7)
ERK		group		1.937	bias	0.000212	CLDN4,GPRC5C,JAG1,JUNB,KRT18,TUBA1A,ZFP36L1
IPMK		kinase				0.000212	ACTB,JUNB,TAGLN2
HOXA5		transcription regulator				0.000212	GADD45B,IGF1,TGFB3
Ni2+		chemical reagent				0.000212	BIRC3,CSF1,LTB
cardiotoxin		chemical - other				0.000213	CCND2,CSF1,EZR,IGF1,PIGR,SPP1
mir-1		microRNA	Inhibited	-2.186	bias	0.000233	ANXA2,CCND2,IGF1,TAGLN2,ZFP36L1
Mst/krs		group				0.000234	NFKB2,RELB
elocalcitol		chemical drug				0.000234	SPP1,TGFB2
2,3-bis(3'-hydroxybenzyl)butane-1,4-diol		chemical - endogenous mammalian				0.000234	SPARC,SPP1
RAD51C		enzyme				0.000234	KRT18,KRT8
COMMD1		transporter				0.00024	BIRC3,KRT19,NFKBIA	40 (7)
SIN3A		transcription regulator				0.00024	CCND2,GADD45B,KLF6,SET
gefitinib		chemical drug		0	bias	0.000241	C3,GADD45B,IGF1,KRT19,NFKB2,RELB	45 (7)
CCR2		G-protein coupled receptor	Activated	2.219	bias	0.000242	CSF1,HSPG2,IGF1,SPARC,TGFB2	67 (13)
melatonin		chemical - endogenous mammalian		0.447		0.000252	IGF1,JUNB,KRT19,SPARC,SPP1	20 (6)
HOXD10		transcription regulator		0		0.000256	CD44,EZR,Gm12854/S100a11,ITGA3
KITLG		growth factor				0.000263	ACTB,CDC42EP5,CSF1,NFKBIA,PLSCR1,Tmsb4x (includes others),Tpm4
HIF1A		transcription regulator		1.528	bias	0.000269	APOE,CD44,CSF1,GADD45B,IGF1,KRT18,KRT19,TGFB2,TGFB3	78 (20)
amino acids		chemical - endogenous mammalian				0.000271	ACTB,IGF1,JUNB
immethridine		chemical reagent				0.000271	C3,CD44,SPP1
PLN		transporter				0.000272	ACTB,ANXA2,EZR,RRAS
IL18		cytokine	Activated	2.169	bias	0.000272	CD44,CSF1,CXCL16,GADD45B,SET,SPP1	71 (17)
SHH		peptidase		1.372	bias	0.00028	CCND2,DAAM1,IGF1,SPP1,TGFB2,TGFB3	40 (9)
DDIT3		transcription regulator		-0.44		0.000284	ANKRD1,JAG1,PDPN,PLEC,TGFB2	15 (3)
let-7a-5p (and other miRNAs w/seed GAGGUAG)		mature microRNA	Inhibited	-2.429	bias	0.000288	CCND2,IFRD1,KRT19,PLEC,SPARC,Tpm1
ursodeoxycholic acid		chemical - endogenous mammalian		1		0.000288	NFKB2,SPARC,SPP1,TGFB2
CD3		complex	Activated	2.607	bias	0.000291	AARS1,BIRC3,CCND2,CD44,IGF1,JUNB,NFKBIA,PLEC,PTP4A1,RELB,ZFP36L1	59 (15)
oleic acid		chemical - endogenous mammalian		-1		0.000296	APOE,GADD45B,IGF1,Mt2,NFKBIA	68 (17)
thyroid hormone		chemical - endogenous mammalian		0.555		0.000297	APOE,COMT,IGF1,S100A10,Tmsb4x (includes others),TTR	46 (7)
salmonella minnesota R595 lipopolysaccharides		chemical - endogenous non-mammalian	Activated	2.205	bias	0.000319	JAG1,JUNB,NFKB2,NFKBIA,RELB	68 (15)
Alpha catenin		group	Inhibited	-2.2	bias	0.000319	BIRC3,IGF1,IL6ST,NFKBIA,RELB	32 (7)
Ifn		group		0.447	bias	0.000319	CD44,HLA-A,IFITM3,IGF1,SPP1	43 (9)
cytarabine		chemical drug		1.982	bias	0.000324	HLA-A,LTB,TGFB2,TGFB3	30 (4)
LATS1		kinase				0.000338	CLDN4,KRT18,KRT19
miR-335-3p (miRNAs w/seed UUUUCAU)		mature microRNA				0.000338	PLEC,SPARC,Tpm1
Igm		complex				0.000343	CCND2,CD44,NFKB2,ZFP36L1	56 (15)
miR-145-5p (and other miRNAs w/seed UCCAGUU)		mature microRNA		-1.009	bias	0.000343	AHNAK,CES1,F11R,KRT7
TNFSF13B		cytokine		1.188	bias	0.000343	CCND2,NFKB2,RELB,SPP1	62 (15)
trovafloxacin		chemical drug	Activated	2	bias	0.000343	BIRC3,HLA-A,JUNB,NFKBIA	49 (11)
Ca2+		chemical - endogenous mammalian		0.431	bias	0.000347	CCND2,ITGA3,JUNB,JUND,KRT8,NFKBIA,SPP1	67 (21)
Tcf 1/3/4		group				0.000349	AMBP,TTR
CSRP3		other				0.000349	KRT18,KRT8
ATF4		transcription regulator		1.982	bias	0.000352	AARS1,ANKRD1,APOE,JAG1,NUPR1,TGFB2	8 (2)
cyclosporin A		biologic drug		0.697	bias	0.000362	ANXA2,APOE,BIRC3,CD44,CLDN4,NFKBIA,S100A10,SPP1,Tpm1	62 (14)
CEBPA		transcription regulator		-1.718	bias	0.000374	C3,CCND2,CSF1,DDX21,IGF1,JUNB,KRT7,SPP1,TGFB2	59 (11)
crizotinib		chemical drug				0.000376	PTP4A1,SPARC,TGFB3
ROCK1		kinase				0.000376	CCND2,CD44,TGFB2	14 (3)
nitroarginine		chemical reagent				0.000376	CD44,JUND,SPP1	55 (15)
MAP2K1		kinase				0.000382	ANKRD1,APOE,BIRC3,CD44,JUND,NFKBIA	68 (17)
RORA		ligand-dependent nuclear receptor		1.165	bias	0.000382	ACTB,APOE,GADD45B,IGF1,Mt2,NFKBIA	55 (11)
nicotine		chemical drug		-1.3	bias	0.000382	CCND2,CD44,IGF1,JUNB,SPP1,TTR	62 (21)
JAK1		kinase				0.000383	HLA-A,IL6ST,JUNB,Oasl2	28 (5)
bromobenzene		chemical toxicant				0.000383	JUND,Mt2,TUBA1A,TUBB2B
curcumin		chemical drug	Inhibited	-2.183	bias	0.000395	APOE,BIRC3,CCND2,CD44,CLDN4,JUNB,JUND,NFKBIA	65 (18)
bleomycin		chemical drug		1.383	bias	0.000404	C3,FOXJ1,IGF1,JAG1,SPP1,TGFB2	64 (18)
ITGB3		transmembrane receptor		1.114	bias	0.000405	CSF1,ILK,ITGA3,SPARC	31 (7)
RUNX3		transcription regulator	Inhibited	-2	bias	0.000414	IL6ST,ILK,JAG1,SPP1,TGFB2
C1QA		other				0.000416	C3,CD44,S100A10
testosterone		chemical - endogenous mammalian		0.554	bias	0.000425	ANKRD1,ANXA3,IGF1,JUND,NFKB2,NFKBIA,PTP4A1,TGFB2	80 (17)
GNA14		enzyme				0.000427	ANKRD1,ANXA3,KLF6,ZFP36L1
MEF2D		transcription regulator		1.98	bias	0.000427	JUNB,JUND,TGFB2,TGFB3
NR4A1		ligand-dependent nuclear receptor				0.000442	APOE,CCND2,CSF1,KRT18,KRT8,NFKBIA,TGFB3	61 (17)
dimethyl sulfoxide		chemical drug		1.342	bias	0.000444	ACTB,CCND2,JUND,NUPR1,Tpm1	47 (7)
ADAMTS18		peptidase				0.000459	CLDN4,ITGA3,TGFB3
SRSF1		other				0.000459	KLF6,LMNA,Tmsb4x (includes others)
levodopa		chemical - endogenous mammalian		-0.489		0.000462	COMT,DAAM1,F11R,GADD45B,HLA-A,JUNB,KLF6,LMNA,Oasl2,PPP1R1B,S100A10
TSC2		other	Inhibited	-2	bias	0.000476	ANXA2,CCND2,IFITM3,TMEM176A,TMEM176B
CACNA1C		ion channel				0.000487	ANXA2,S100A10
Hmgb2 (includes others)		transcription regulator				0.000487	NFKB2,TGFB3
Y 27632		chemical drug	Inhibited	-2	bias	0.000499	ACTB,ACTG1,CD44,Tpm1	23 (3)
E. coli B4 lipopolysaccharide		chemical toxicant		0.605	bias	0.000502	HLA-A,IFITM3,NFKBIA,Oasl2,PPP1R1B,RELB,TTR
HOXC8		transcription regulator				0.000505	ANKRD1,KRT19,SPP1
NRXN1		transporter				0.000505	CD47,F11R,FLRT2
ELAVL1		other		0.747	bias	0.000512	ATP1B3,Bst2,HLA-A,IFITM3,NFKBIA,PIGR
Il3		cytokine				0.000525	CCND2,CSF1,IGF1,SPP1	60 (18)
rosiglitazone		chemical drug		-0.518	bias	0.000527	APOE,C3,CSF1,IGF1,ILK,ITGA3,KRT18,SEMA3C,TGFB3	46 (10)
BCR (complex)		complex		1.959	bias	0.000528	CCND2,CD44,JUNB,NFKB2,S100A10	48 (14)
APC		enzyme				0.000546	CCND2,CD44,IGF1,JAG1,SPP1
MARK2		kinase				0.000554	CD44,IGF1,SLCO3A1
CASR		G-protein coupled receptor		0.447	bias	0.000564	CCND2,CD44,CSF1,NUPR1,TGFB2	16 (3)
rottlerin		chemical toxicant		-1.997	bias	0.000579	APOBEC3B,BIRC3,CLDN4,PLSCR1
WNT3A		cytokine	Activated	2.63	bias	0.000579	CCND2,CD44,DCLK1,JAG1,SPARC,TGFB2,TGFB3	9 (3)
miR-30c-5p (and other miRNAs w/seed GUAAACA)		mature microRNA	Inhibited	-2.224	bias	0.000603	IFRD1,KRT7,PLEC,SPARC,Tpm1
DYSF		other				0.000608	ACTG1,ANKRD1,ANXA2,HLA-A
fenretinide		chemical drug		-1		0.000608	ANKRD1,IGF1,ILK,NFKBIA	32 (7)
MAPK1		kinase		-0.956		0.000624	APOE,IFITM3,JUNB,JUND,LMNA,NUPR1,PLSCR1,SPP1	63 (13)
troglitazone		chemical drug		0		0.000624	ANXA2,BIRC3,C3,CCND2,IFRD1,NFKBIA,PLEC,SPP1	53 (16)
PD173074		chemical reagent		0.594	bias	0.000637	CCND2,KRT7,LTB,NUPR1
simvastatin		chemical drug		1.067		0.000642	ANXA3,APOE,CCND2,NFKBIA,SPP1,Tpm1	63 (17)
LTBP4		growth factor				0.000648	TGFB2,TGFB3
S100A10	0.464	other				0.000648	ANXA2,S100A10
aplidine		biologic drug				0.000648	JUNB,JUND	17 (3)
resveratrol		chemical drug		-0.767		0.000653	BIRC3,CCND2,JAG1,JUND,NFKBIA,SPP1,TGFB2	61 (18)
PRKCQ		kinase				0.00066	CD44,EZR,NFKB2	52 (9)
SYVN1		transporter	Activated	2.236	bias	0.000664	ATP1B3,CD44,HLA-A,ITGA3,NFKB2
CXCL8		cytokine		1	bias	0.000668	CD44,HSPG2,IFRD1,NFKBIA	23 (5)
JUND	0.498	transcription regulator				0.000668	C3,CXCL16,JUND,SPP1	54 (10)
Jnk		group		1.506	bias	0.000674	BIRC3,CD44,IGF1,JUND,KLF6,PLSCR1	63 (20)
LDLR		transporter				0.000674	APOE,Bst2,CD47,HSPG2,MFGE8,SPP1
HNF4A		transcription regulator		-1.154		0.000676	AHNAK,AKAP13,AMBP,APOE,C3,F11R,GADD45B,HLA-A,IGF1,IL6ST,JUNB,KRT7,KRT8,Mt2,PLSCR1,SEMA3C,SPP1,TAGLN2,TMEM176A,TMEM176B,TTR,TUFT1
DMD		other				0.00069	ACTG1,ANKRD1,IGF1,KRT18,S100A10,Tmsb4x (includes others)
MACROH2A1		other	Inhibited	-2		0.000699	ANXA2,CCND2,LTB,SPARC
MBD3		other				0.000699	APOE,CCND2,CD44,DAAM1
CTNNB1		transcription regulator		1.493	bias	0.000703	ACTB,AKAP13,CCND2,CD44,CD47,GADD45B,KRT7,LMNA,MFGE8,SEMA3C,SPP1,TGFB3,TUBB2B	60 (12)
TICAM1		other	Activated	2.2	bias	0.000707	APOBEC3B,JAG1,NFKB2,NFKBIA,RELB	46 (15)
8-bromoguanosine 3',5'-cyclic monophosphate		chemical - kinase inhibitor				0.000717	JUNB,S100A10,TGFB3
miR-338-3p (miRNAs w/seed CCAGCAU)		mature microRNA				0.000717	PLEC,SPARC,Tpm1
mercuric chloride		chemical toxicant				0.000717	JUNB,Mt2,SPP1	46 (7)
CNTF		cytokine				0.000732	ACTB,IL6ST,JUNB,PPP1R1B	13 (3)
CD40		transmembrane receptor		1.954	bias	0.000777	BIRC3,CCND2,CD44,CSF1,NFKB2,NFKBIA	44 (14)
MSX2		transcription regulator				0.000778	SPP1,TGFB2,TGFB3
FGFR3		kinase				0.000778	LTB,SPARC,SPP1
MMP2		peptidase				0.000778	CD44,IL6ST,ITGA3	23 (3)
ETS1		transcription regulator		0.747	bias	0.000795	CD44,JUNB,KRT8,LTB,SPP1,TGFB2	25 (5)
NCOA1		transcription regulator		0.339		0.0008	C3,IGF1,ILK,JUNB,NFKBIA	53 (10)
HMGA1		transcription regulator		-0.447	bias	0.000825	CCND2,CD44,IGF1,JUNB,SPARC	35 (8)
rifampin		chemical drug				0.000825	CES1,CSF1,IFRD1,PLEC,SPP1
6-amino-4-(4-phenoxyphenylethylamino)quinazoline		chemical reagent				0.00083	APOE,C3
TPM3	0.26	other				0.00083	IGF1,ITGA3
LIMS1		other				0.00083	ILK,TGFB2
ST6GAL1		enzyme				0.00083	BIRC3,CCND2
DEK		transcription regulator				0.00083	BIRC3,NFKBIA
PIK3R1		kinase		-0.655	bias	0.000837	CCND2,CD44,TGFB2,TGFB3	59 (10)
LYN		kinase				0.000837	CSF1,NFKB2,NFKBIA,TGFB3	45 (10)
CCN1		other		1	bias	0.000837	C3,CCND2,IL6ST,ITGA3	34 (8)
genistein		chemical drug		-0.82		0.000839	C3,CD44,HLA-A,IGF1,JUNB,JUND,SPP1,TGFB3	67 (20)
MEX3A		other				0.000841	CD44,DCLK1,TUBA1A
NSD2		enzyme				0.000841	CCND2,IGF1,RRAS
SUMO3		other				0.000841	Bst2,CCND2,CXCL16
GFI1		transcription regulator	Inhibited	-2.236	bias	0.00085	CCND2,CSF1,NFKB2,NFKBIA,RELB	56 (15)
NFYA		transcription regulator				0.000874	GADD45B,IGF1,JUNB,JUND
TP73		transcription regulator		0.788	bias	0.000908	C3,FOXJ1,JAG1,NUPR1,PDPN,SPP1,TGFB2,TTR
JAG2		growth factor				0.000908	C3,JAG1,SPP1
TGM2		enzyme		1.342	bias	0.000913	ATP1B3,BIRC3,C3,PLSCR1,RNF213,SPP1
PTGER4		G-protein coupled receptor		0.447		0.000929	CD44,RNF213,SPP1,TAGLN2,ZFP36L1
epigallocatechin-gallate		chemical drug		0.762	bias	0.000934	GADD45B,IL6ST,JUNB,JUND,NFKBIA,RELB	56 (14)
STAT3		transcription regulator		1.942	bias	0.000935	CCND2,CD44,HLA-A,IFITM3,IL6ST,JAG1,JUNB,NEURL3,NFKB2,PLSCR1	73 (20)
hydrogen peroxide		chemical - endogenous mammalian	Activated	2.607	bias	0.000936	ANKRD1,ANXA2,BIRC3,CSF1,EZR,GADD45B,ITGA3,SPARC,SPP1	58 (18)
1,25-dihydroxyvitamin D		chemical drug				0.000978	CCND2,CSF1,IGF1	8 (3)
LATS2		kinase				0.000978	CLDN4,KRT18,KRT19	7 (2)
CREM		transcription regulator				0.000985	APOE,CCND2,GADD45B,JUNB,Tpm1	10 (2)
ZFHX3		transcription regulator				0.000992	HLA-A,IFITM3,TUBA1A,TUBB2B
RASSF1		other		0		0.000992	APOE,CCND2,SPP1,TUBB2B	32 (5)
TRAF3		enzyme	Inhibited	-2		0.00103	BIRC3,NFKB2,NFKBIA,RELB	40 (12)
TAF5		transcription regulator				0.00103	ACTB,IGF1
kainic acid		chemical toxicant		0.359	bias	0.00107	APOE,GADD45B,JUNB,JUND,SPP1	67 (18)
TCF		group				0.00108	AKAP13,CD44,JUNB,SEMA3C	31 (4)
REL		transcription regulator		1.961	bias	0.00111	CCND2,GADD45B,HLA-A,NFKB2,NFKBIA,RELB	40 (9)
TO-901317		chemical reagent		-0.043	bias	0.00111	APOE,C3,COMT,IGF1,Mt2,NFKBIA	62 (18)
erlotinib		chemical drug		1	bias	0.00112	NFKB2,NFKBIA,RELB,Tmsb4x (includes others)
AG490		chemical - kinase inhibitor		-1.131	bias	0.00112	BIRC3,IGF1,S100A10,SPP1	45 (10)
SUMO2		enzyme				0.00113	Bst2,CCND2,CXCL16
CSF1R		kinase				0.00113	CCND2,CSF1,JUNB	56 (11)
FASLG		cytokine				0.00113	CD44,TGFB2,TGFB3
nitric oxide		chemical - endogenous mammalian		0.847	bias	0.00113	CD44,HSPG2,JUNB,Mt2,SPP1	70 (19)
CD38		enzyme	Activated	2.219	bias	0.00117	ANXA2,CCND2,CD44,MYADM,TUBB2B
okadaic acid		chemical toxicant		0.689	bias	0.00121	CCND2,JUNB,JUND,SPP1	56 (17)
EPHB1		kinase				0.00126	IL6ST,JUNB
NRBP2		kinase				0.00126	ANXA2,KRT19
DRD1		G-protein coupled receptor				0.00126	JUNB,S100A10
enterolactone		chemical - endogenous mammalian				0.00126	SPARC,SPP1
SMAD4		transcription regulator	Activated	2.198	bias	0.00126	CCND2,CSF1,GADD45B,JAG1,NFKBIA,TGFB2	66 (16)
prednisolone		chemical drug		-0.816	bias	0.00129	APOE,BIRC3,BNIP2,IGF1,JAG1,SPP1	70 (12)
HDAC3		transcription regulator				0.00131	BIRC3,NFKBIA,RELB,SPP1	40 (9)
bee venom		chemical - endogenous non-mammalian				0.00136	IFRD1,JUNB,NFKBIA,NUPR1
EIF2AK2		kinase				0.00136	NFKB2,NFKBIA,PLSCR1,TUBA1A	33 (6)
Hdac		group		0.254		0.00137	GADD45B,IGF1,KLF6,SEMA3C,SPP1	74 (14)
bortezomib		chemical drug		-1.253		0.00137	BIRC3,CCND2,GADD45B,IGF1,IL6ST,PSMD11	8 (2)
ZMPSTE24		peptidase				0.00138	GADD45B,IGF1,LMNA
POU5F1		transcription regulator		1.596	bias	0.0014	BIRC3,BNIP2,KRT18,Oasl2,SPP1,TGFB2,TGFB3	15 (2)
IL3		cytokine	Activated	2.236	bias	0.00145	BIRC3,CCND2,CSF1,GADD45B,HLA-A,JUNB,PDPN	57 (17)
filgrastim		biologic drug		-0.863		0.00146	ANXA3,BIRC3,CD44,KLF6,RELB,S100A10,SPP1,ZFP36L1
SMAD1		transcription regulator				0.00147	CSF1,GADD45B,SPP1	14 (3)
Mek		group		1.473	bias	0.00148	APOE,BCAM,CCND2,DDX21,JUNB,SEMA3C,Tpm1
IL15		cytokine		1.982	bias	0.00149	CCND2,CD44,CSF1,JUNB,NFKBIA,PTP4A1,SET,ZFP36L1	60 (14)
IKZF1		transcription regulator		-1.636	bias	0.00149	CCND2,IGF1,IL6ST,RNF19A,RNF213,SPPL2A
LIMA1		other				0.00151	KRT18,KRT8
RASGRF1		other				0.00151	IGF1,RRAS
pirinixic acid		chemical toxicant	Activated	2.428	bias	0.00155	ANXA2,APOE,C3,GADD45B,IFITM3,JUNB,KRT8,NFKBIA	54 (15)
MAPK8		kinase		1.432	bias	0.00156	APOE,BIRC3,CXCL16,JUND,KLF6	52 (11)
SMARCB1		transcription regulator		1.226	bias	0.00156	CD44,CSF1,DSG2,F11R,SPARC
C3AR1		G-protein coupled receptor				0.00157	C3,IGF1,TGFB2
fluticasone propionate		chemical drug		0.651		0.0016	C3,CES1,GADD45B,MFGE8,SPP1
cigarette smoke		chemical toxicant		1.023	bias	0.00161	C3,IGF1,NFKBIA,Oasl2,PTP4A1,Tmsb4x (includes others)
F2R		G-protein coupled receptor		0	bias	0.00163	CD44,KRT19,KRT8,TGFB2	21 (5)
NR1H2		ligand-dependent nuclear receptor				0.00163	APOE,C3,CXCL16,NFKBIA	18 (3)
docosahexaenoic acid		chemical drug	Inhibited	-2.2	bias	0.00164	APOE,CD44,CSF1,TGFB2,TGFB3	56 (15)
ATF3		transcription regulator		-1.165		0.00175	BIRC3,CXCL16,KRT19,NFKB2	44 (10)
ITGA5		transmembrane receptor				0.00177	APOE,CD44,JUNB	42 (9)
SAMHD1		enzyme				0.00178	NFKB2,NFKBIA
CSF2RA		transmembrane receptor				0.00178	CCND2,JUNB	28 (5)
KRT8	0.415	other				0.00178	KRT18,KRT19
6-aminopyrazolopyrimidine derivative compound II		chemical - kinase inhibitor				0.00178	IFITM3,Oasl2	7 (2)
IL10		cytokine		0.392		0.00178	CCND2,CD44,CSF1,CXCL16,FLRT2,IL6ST,LTB,SPP1	63 (20)
PIK3CG		kinase		-0.283		0.00182	APOBEC3B,CD47,HLA-A,KRT8
bucladesine		chemical toxicant		0.105	bias	0.00182	APOE,CD44,GADD45B,IGF1,JUNB,TGFB2,TGFB3	67 (19)
PNPT1		enzyme				0.00187	Bst2,Oasl2,RNF213
GLI2		transcription regulator				0.00188	CCND2,JAG1,JUNB,SPP1	49 (7)
FOXO1		transcription regulator		1	bias	0.00191	ANXA3,BIRC3,GADD45B,IGF1,ITGA3,JAG1,JUNB,PLSCR1
CD24		other				0.00195	APOBEC3B,PTP4A1,RELB,TUFT1
POR		enzyme				0.00195	ACTG1,GADD45B,HLA-A,TMEM176A,TUBB2B
PPARA		ligand-dependent nuclear receptor		0.44		0.00196	ANXA2,APOE,C3,F11R,IFITM3,KRT8,NFKBIA,SERINC2	54 (14)
TNFAIP3		enzyme				0.00198	BIRC3,CSF1,NFKBIA	55 (12)
PLK1		kinase				0.00198	ANKRD1,TGFB2,TGFB3
2-(4-amino-1-isopropyl-1H-pyrazolo[3,4-d]pyrimidin-3-yl)-1H-indol-5-ol		chemical reagent		1.387		0.002	AKAP13,ANKRD1,CD44,IFRD1,KLF6
KLF2		transcription regulator		-0.391		0.002	CD44,JUNB,NFKBIA,PDPN,TGFB2
HOXA10		transcription regulator		-1.342	bias	0.00205	ACTB,APOE,KRT18,PDPN,PIGR
metformin		chemical drug		-0.6		0.00205	CCND2,GADD45B,IGF1,ILK,NFKBIA	55 (15)
Hnf3		group				0.00207	AMBP,TTR
STOX1		other				0.00207	ACTG1,GADD45B
PSMB10		peptidase				0.00207	NFKB2,NFKBIA	23 (7)
COL9A1		other				0.00207	HSPG2,MFGE8
pentobarbital		chemical drug				0.00207	JUNB,JUND	33 (7)
2,3,4,7,8-pentachlorodibenzofuran		chemical toxicant				0.0021	CD44,CES1,COMT
brefeldin A		chemical - endogenous non-mammalian				0.0021	CD44,GADD45B,HLA-A	54 (11)
carrageenan		chemical drug				0.0021	JUNB,JUND,NFKBIA	46 (7)
CDKN1A		kinase		0.555	bias	0.00211	ACTB,CD44,IFITM3,JAG1,KRT18,NFKBIA	53 (6)
ciprofloxacin		chemical drug		0.218		0.00215	CD47,HLA-A,MFGE8,SPP1
diethylnitrosamine		chemical toxicant				0.00215	DCLK1,KRT8,Mt2,PLSCR1
PTGS2		enzyme				0.0022	ANXA2,BIRC3,CD44,EZR,IGF1	57 (16)
IRF4		transcription regulator		-0.277		0.00225	BIRC3,EZR,PLSCR1,SPP1,ZFP36L1
HDAC1		transcription regulator		1.091		0.00227	CCND2,CD44,Mt2,NFKBIA,RELB,SPP1	45 (13)
black raspberry extract		chemical drug				0.00229	AHNAK,AMBP,ANXA2,CD44
TRIM24		transcription regulator		-1.732	bias	0.00229	Bst2,Gm12854/S100a11,PLEC,SPP1
L-methionine		chemical - endogenous mammalian				0.00234	GADD45B,NFKBIA,SPP1	50 (6)
SAFB		other				0.00234	IGF1,LTB,NUPR1
JAG1	0.251	growth factor				0.00234	CCND2,SPP1,TGFB3	26 (7)
hyaluronic acid		chemical - endogenous mammalian		0.48	bias	0.00237	CD44,NFKBIA,SPP1,TGFB2	59 (17)
Rxr		group				0.00237	APOE,IGF1,ILK,SPP1
NSD1		transcription regulator				0.00238	KLF6,ZFP36L1
HOXB4		transcription regulator				0.00238	CCND2,JUNB
N-ethyl-N-nitrosourea		chemical toxicant				0.00238	Mt2,SPP1
amlodipine		chemical drug				0.00238	ANXA2,S100A10
CST5		other	Inhibited	-2.433	bias	0.0024	AHNAK,ANXA2,ANXA3,CD44,DDX21,EZR
NOS2		enzyme		0.447		0.00241	CD44,KLF6,NFKBIA,PIGR,PLSCR1	74 (22)
valproic acid		chemical drug		1.118		0.00245	Bmyc,CCND2,CD44,GADD45B,JUND,PSMD11,SEMA3C,SPP1	67 (18)
CDK9		kinase				0.00246	CCND2,NFKBIA,Tmsb4x (includes others)	38 (4)
FGF10		growth factor				0.00246	AHNAK,ANXA2,ANXA3
FOSL2		transcription regulator				0.00246	Gm12854/S100a11,RELB,SPP1
MAPK14		kinase		1.387	bias	0.00247	ANKRD1,JUNB,JUND,SPP1,Tpm1	68 (18)
SPI1		transcription regulator		-0.2	bias	0.00253	ACTB,CCND2,CSF1,DDX21,IFITM3,SPP1	55 (14)
YAP1		transcription regulator	Activated	2.401	bias	0.00253	ACTG1,ANKRD1,CSF1,LMNA,NUPR1,TGFB2	16 (4)
TGFB2	0.396	growth factor		1.96	bias	0.0026	HSPG2,JAG1,SPP1,TGFB2	32 (9)
cocaine		chemical drug		1.452	bias	0.00264	GADD45B,JUNB,NFKB2,PPP1R1B,Tpm1
cholecalciferol		chemical - endogenous mammalian				0.00268	ANXA2,CSF1,IGF1,SPP1	33 (7)
CSF2RB		transmembrane receptor				0.00271	CCND2,JUNB	48 (16)
picropodophyllin		chemical drug				0.00271	CCND2,IFITM3
H1-2		other				0.00271	ACTB,LTB
STK3		kinase				0.00271	PDPN,SPP1
BCL10		transcription regulator				0.00271	CD44,NFKB2	33 (11)
S1PR3		G-protein coupled receptor				0.00271	CD44,IGF1	40 (12)
GFAP		other				0.00271	CD44,PLEC
BHLHA15		transcription regulator				0.00271	KRT19,NUPR1
AQP1		transporter				0.00271	CES1,NUPR1
S-nitroso-N-acetyl-DL-penicillamine		chemical reagent				0.00273	S100A10,SPP1,TGFB3
CLEC4G		other				0.00273	CSF1,MFGE8,TGFB3
glucagon		biologic drug				0.00273	AHNAK,LMNA,PPP1R1B
PTP4A1	0.328	phosphatase		1.982		0.00277	AARS1,MYADM,SPARC,TAGLN2
trichloroethylene		chemical toxicant				0.00287	CD47,MFGE8,SPARC
SIRT6		enzyme				0.00287	BIRC3,CSF1,IGF1
GPER1		G-protein coupled receptor				0.00287	IGF1,NFKBIA,TUFT1
benzene		chemical toxicant				0.00287	CD47,MFGE8,SPARC
TREM1		transmembrane receptor		1.109	bias	0.00288	CSF1,GADD45B,NFKB2,NFKBIA,SPP1	67 (15)
GATA6		transcription regulator		0.283		0.00288	BCAM,KRT7,SEMA3C,SPARC,TGFB2
thapsigargin		chemical toxicant		0.327	bias	0.00294	BIRC3,CLDN4,GADD45B,IGF1,NFKBIA	54 (11)
lactacystin		chemical - protease inhibitor		0.896	bias	0.00294	ACTB,CCND2,HLA-A,IFRD1,NFKBIA	54 (9)
IL5		cytokine	Activated	2.433	bias	0.00301	ANXA2,CCND2,DDX21,LTB,MYADM,TUBB2B
STAT5A		transcription regulator		1.408		0.00301	APOE,BIRC3,CCND2,IGF1,IL6ST,LTB	68 (16)
PSMB8		peptidase				0.00306	NFKB2,NFKBIA	23 (7)
CD70		cytokine				0.00306	CCND2,CD44	33 (7)
PPP2R5C		other				0.00306	BIRC3,RELB
SMAD6		transcription regulator				0.00306	SPP1,TGFB3
CLDN7		other		1.067		0.00312	ANXA3,APOE,C3,TPRG1L
interferon beta-1a		biologic drug				0.00321	BNIP2,GADD45B,LTB,NFKBIA
EPO		cytokine		1.214	bias	0.00327	ACTB,CCND2,JUNB,NFKBIA,NUPR1,SPP1	59 (16)
MIR17HG		other		-1.982	bias	0.0033	HSPG2,IL6ST,JAG1,RNF11
RUNX2		transcription regulator		-0.396	bias	0.0033	FLRT2,GADD45B,JAG1,SPP1	28 (6)
CXCR4		G-protein coupled receptor				0.00331	CD44,JUNB,RRAS
ELK1		transcription regulator				0.00331	JUNB,NUPR1,SPP1	8 (3)
vitamin D		chemical drug				0.00331	COMT,NFKBIA,SPP1
STAT5a/b		group				0.0034	CCND2,CDC42EP5,IGF1,Tmsb4x (includes others)
GLIS2		transcription regulator				0.00343	C3,SPARC
C5AR1		G-protein coupled receptor				0.00346	C3,IGF1,TGFB2
glucocorticoid		chemical drug		-0.478		0.0035	CD44,CSF1,NFKBIA,PIGR,SPP1,TGFB2	69 (18)
tazemetostat		chemical drug		0		0.00355	ANKRD1,CCND2,DSG2,EZR,SEMA3C,SPP1
IL12 (complex)		complex	Activated	2.208	bias	0.00356	CD44,CSF1,GADD45B,LTB,SET	64 (15)
1,2-dithiol-3-thione		chemical reagent	Activated	2.229	bias	0.00356	ACTG1,LMNA,PSMD11,Tpm1,TTR
MECP2		transcription regulator				0.0036	ACTB,APOE,JUNB,LMNA	9 (3)
RXRA		ligand-dependent nuclear receptor				0.00361	APOE,C3,IGF1,ILK,SPP1,TGFB2	55 (11)
sunitinib		chemical drug				0.00363	CCND2,CD44,ITGA3	33 (7)
IL25		cytokine				0.00363	F11R,JAG1,ZFP36L1
atorvastatin		chemical drug		1.342		0.00363	APOE,GADD45B,JUNB,SPP1,TGFB3	67 (17)
KLF11		transcription regulator				0.0037	ILK,ITGA3,TGFB2,TGFB3
BMP2		growth factor		1.178	bias	0.00371	CSF1,GADD45B,JUNB,SPARC,SPP1	61 (19)
3-deazaneplanocin		chemical drug				0.00379	KLF6,KRT7,NUPR1
NR4A3		ligand-dependent nuclear receptor				0.00379	BIRC3,CCND2,TGFB3	40 (7)
MMP12		peptidase				0.00379	IL6ST,NFKBIA,PSMD11
napabucasin		chemical drug				0.00379	ACTB,CD44,JAG1
IL1RN		cytokine		0.147	bias	0.0038	CD44,IGF1,KLF6,SPP1	62 (19)
TNFRSF13C		transmembrane receptor				0.00382	NFKB2,RELB	30 (10)
CCKBR		G-protein coupled receptor				0.00382	KRT19,SPARC
NUMB		other				0.00382	BIRC3,Mt2
ITGA6		transmembrane receptor				0.00382	CCND2,ITGA3	33 (7)
BIRC2		enzyme				0.00382	BIRC3,CSF1	38 (7)
TBXT		transcription regulator				0.00382	CD44,ITGA3
HNRNPU		transporter				0.00382	ACTB,SPP1
vitamin K2		chemical drug				0.00382	CSF1,SPP1
SNAI2		transcription regulator				0.00396	ANKRD1,ITGA3,KRT18
25-hydroxycholesterol		chemical reagent				0.00396	JUNB,JUND,NFKBIA	46 (7)
FGFR2		kinase				0.00401	CCND2,IGF1,SPP1,TTR	44 (13)
infliximab		biologic drug				0.00413	CCND2,NFKB2,NFKBIA
EGLN1		enzyme				0.00413	JAG1,TGFB2,TGFB3	27 (6)
methylmercury		chemical toxicant				0.00413	CD47,MFGE8,SPARC
hydroxyurea		chemical drug				0.00413	BCAM,CCND2,KRT18
SP3		transcription regulator				0.00417	CD2AP,CES1,IGF1,RRAS,SPARC
tunicamycin		chemical - endogenous non-mammalian		1.346	bias	0.00417	BIRC3,GADD45B,IFRD1,ILK,NFKBIA	40 (7)
11,12-epoxyeicosatrienoic acid		chemical - endogenous mammalian				0.00423	CD44,NFKBIA	22 (5)
SMARCD3		transcription regulator				0.00423	CD44,ITGA3
PPP1R13L		transcription regulator				0.00423	CCND2,ITGA3
LY6E		other				0.00423	NFKBIA,RELB
S1PR1		G-protein coupled receptor				0.00423	IGF1,JUNB	14 (4)
HNRNPA1		enzyme				0.00423	CD44,ILK
HRG		other				0.00423	SPARC,SPP1
finasteride		chemical drug				0.00423	TGFB2,TGFB3
SP2509		chemical reagent		0		0.00423	ANKRD1,CCND2,DSG2,EZR,SEMA3C,SPP1
vitamin E		chemical drug				0.00431	CD44,KLF6,SPP1	57 (14)
SOX7		transcription regulator				0.00431	HSPG2,KRT7,MFGE8
POLR2A		enzyme				0.00431	ACTB,NFKBIA,Tmsb4x (includes others)	38 (3)
TBP		transcription regulator				0.00431	ACTB,HLA-A,NFKBIA	10 (3)
Collagen type I (complex)		complex				0.0045	APOE,ITGA3,S100A10
3,3'-diindolylmethane		chemical drug				0.0045	HLA-A,KRT19,NFKBIA	40 (7)
ADORA2A		G-protein coupled receptor	Inhibited	-2		0.00458	IFITM3,NFKBIA,PPP1R1B,SPARC
NR3C2		ligand-dependent nuclear receptor				0.00458	APOE,IGF1,JUNB,SEMA3C	68 (15)
n-nitrosomethylbenzylamine		chemical toxicant				0.00458	AHNAK,AMBP,ANXA2,CD44
Pkc(s)		group		1.217	bias	0.0046	GADD45B,JUNB,KLF6,KRT8,SPP1	69 (17)
NKX2-3		transcription regulator		-0.447		0.0046	CXCL16,DCLK1,FLRT2,PLSCR1,RNF213
HOXA11		transcription regulator				0.00466	CD47,SPP1
GNAI3		enzyme				0.00466	CSF1,SPP1	22 (4)
SIN3B		transcription regulator				0.00466	GADD45B,KLF6
EPOR		transmembrane receptor				0.00466	CCND2,JUNB	34 (8)
CYP2J2		enzyme				0.00466	CD44,NFKBIA	22 (5)
ADORA3		G-protein coupled receptor				0.00466	CSF1,SPP1
PD 169316		chemical - kinase inhibitor				0.00466	BIRC3,CCND2	32 (7)
SPDEF		transcription regulator				0.00468	BIRC3,FOXJ1,ITGA3
DKK1		growth factor				0.00468	CD44,KRT18,SPARC
ITGB1		transmembrane receptor				0.00482	APOE,HSPG2,ITGA3,JUNB	34 (5)
MAVS		other				0.00488	IFITM3,Oasl2,SPP1
TRAF6		enzyme				0.00488	BIRC3,CXCL16,RELB	60 (17)
GDNF		growth factor				0.00488	ACTB,PPP1R1B,RNF11
bovine testicular hyaluronidase		biologic drug				0.00488	CD44
Gm26504		other				0.00488	IGF1
DNAJA4		other				0.00488	APOE
SNORD21		other				0.00488	HLA-A
Lamin b		group				0.00488	LMNA
MACROD1		enzyme				0.00488	NFKBIA
CCDC22		other				0.00488	BIRC3
CYTL1		cytokine				0.00488	IGF1
TPH2		enzyme				0.00488	IGF1
MLLT11		other				0.00488	CD44
DSC2		other				0.00488	CD44
GPX6		enzyme				0.00488	PPP1R1B
SGTA		other				0.00488	IGF1
RAB27A		enzyme				0.00488	CD44
recombinant interferon alpha		biologic drug				0.00488	RNF213
CFI		peptidase				0.00488	C3
mir-542		microRNA				0.00488	ILK
mir-1301		microRNA				0.00488	KLF6
EIF2B2		other				0.00488	ACTB
CAMK2		group				0.00488	BIRC3
EPSTI1		other				0.00488	NFKBIA
PTS		enzyme				0.00488	IGF1
NXF3		transporter				0.00488	TGFB3
PSMC4		peptidase				0.00488	CCND2
PSMA2		peptidase				0.00488	CCND2
PDPN	0.298	other				0.00488	CD44
CFD		peptidase				0.00488	C3
NOCT		transcription regulator				0.00488	IGF1
INHBE		growth factor				0.00488	JUNB
CDKL2		kinase				0.00488	CD44
ALYREF		transcription regulator				0.00488	APOE
SRRM1		other				0.00488	CD44
IFITM3	0.366	other				0.00488	SPP1
PSMD6		enzyme				0.00488	CCND2
KRT7-AS		other				0.00488	KRT7
BW-755C		chemical drug				0.00488	JUND
nafoxidine		chemical drug				0.00488	C3
tetrabenazine		chemical drug				0.00488	PPP1R1B
synthetic peptide		chemical reagent				0.00488	SPARC
tolcapone		chemical drug				0.00488	COMT
2-nitrophenyl EGTA		chemical reagent				0.00488	AHNAK
2',5'-dideoxyadenosine		chemical reagent				0.00488	IGF1
gestodene		chemical drug				0.00488	TGFB3
hydrocortisone phosphate		chemical drug				0.00488	APOE
tamoxifen		chemical drug		1.313		0.00493	AHNAK,AMBP,C3,IGF1,JUNB,SPP1	61 (15)
TERT		enzyme				0.00494	KRT19,MFGE8,NFKBIA,SPP1
STAT4		transcription regulator	Activated	2.216	bias	0.00496	AHNAK,C3,KRT18,TGFB3,TUBB2B
AGN194204		chemical drug		1.342	bias	0.00505	ANXA2,IFITM3,KLF6,LMNA,SPP1
sulindac sulfide		chemical drug				0.00507	BCAM,IFRD1,KRT19
CaMKII		complex				0.00511	BIRC3,CD44	38 (12)
SALL4		transcription regulator				0.00511	CD44,KRT19
SLC9A3R1		other				0.00511	EZR,KRT19
ELF5		transcription regulator				0.00511	ILK,KRT8
beta-glycerophosphoric acid		chemical - endogenous mammalian				0.00511	SPARC,SPP1
selenomethylselenocysteine		chemical - endogenous mammalian				0.00511	ATP1B3,CES1
2-amino-5-phosphonovaleric acid		chemical - other		-1.951		0.00519	GADD45B,IFRD1,JUNB,RELB
ETS2		transcription regulator				0.00528	JUNB,KRT18,SPP1
FGF7		growth factor				0.00528	CD44,CSF1,S100A10
silibinin		chemical drug				0.00528	CD44,KRT18,NFKBIA	39 (12)
GnRH-A		chemical reagent				0.00528	GADD45B,JUNB,KLF6
ZBTB16		transcription regulator				0.00532	CD44,IL6ST,SPP1,TMEM176B
CAV1		transmembrane receptor				0.00546	KRT18,KRT19,KRT7,KRT8
mir-34		microRNA				0.00548	BIRC3,CCND2,CD47
PIK3CA		kinase				0.00548	CD44,JAG1,SPARC	14 (3)
EPAS1		transcription regulator				0.00553	BIRC3,CDC42EP5,CHMP2B,GADD45B,TGFB3
FAM3B		cytokine				0.00558	KRT19,SPARC
HTATIP2		transcription regulator				0.00558	SPARC,SPP1
TFPI2		other				0.00558	GADD45B,JUNB
MBD1		transcription regulator				0.00558	APOE,SLCO3A1
CISH		other				0.00569	CSF1,IFRD1,SPP1
IL13		cytokine		0.59	bias	0.00569	C3,CD44,EZR,IGF1,JAG1,KLF6,SPP1	65 (19)
NTRK2		kinase				0.00591	CCND2,JAG1,SPP1
TFAP2C		transcription regulator				0.00591	CD44,JAG1,KRT8	14 (3)
cadmium		chemical toxicant				0.00591	C3,ILK,Mt2
CCND1		transcription regulator		0.447		0.00596	AHNAK,Bmyc,CCND2,CD44,SPP1,TGFB3	22 (4)
GRHL2		transcription regulator				0.00607	CLDN4,SEMA3C
MAP3K3		kinase				0.00607	TGFB2,TGFB3	4 (2)
TNFRSF11B		transmembrane receptor				0.00607	IGF1,SPP1	29 (7)
TGFB1I1		transcription regulator				0.00607	KRT18,KRT19
PRKAA1		kinase		-1	bias	0.00629	BIRC3,IGF1,NFKBIA,ZFP36L1	41 (11)
halofuginone		chemical drug				0.00629	CD44,SPARC,SPP1,TGFB3	27 (6)
FOSL1		transcription regulator				0.00636	CD44,JUNB,SPARC
RUNX1		transcription regulator				0.00637	ANXA2,CSF1,IFITM3,Oasl2,SPP1	8 (2)
N-acetyl-L-cysteine		chemical drug		-1.172	bias	0.00648	BIRC3,C3,CCND2,NFKBIA,SPP1	60 (18)
calcipotriene		chemical drug				0.00657	JUNB,SPP1
dibutyl phthalate		chemical toxicant				0.00657	JUNB,SPP1	39 (4)
HEXIM1		transcription regulator				0.00657	TGFB2,Tmsb4x (includes others)
Notch		group				0.00659	ANKRD1,GADD45B,JAG1	27 (6)
PRKCE		kinase				0.00659	BIRC3,IL6ST,JUNB
PRNP		other				0.00659	APOE,CD44,NFKBIA	40 (9)
SMAD7		transcription regulator		-0.862		0.00659	KRT8,NFKBIA,TGFB2,TGFB3
Z-LLL-CHO		chemical - protease inhibitor		1.521	bias	0.00666	ACTB,BIRC3,CCND2,CLDN4,NFKB2,NFKBIA	52 (13)
JAK2		kinase				0.00674	ACTB,CCND2,MYL12A,SET
MAP2K1/2		group				0.00682	C3,CCND2,JAG1	42 (10)
(+)-MK-801		chemical drug				0.00682	JUNB,JUND,NFKBIA	39 (4)
ascorbic acid		chemical - endogenous mammalian				0.00682	IGF1,SPARC,SPP1
MAP3K8		kinase				0.0069	APOE,BIRC3,JUNB,TUBB2B	36 (10)
cytokine		group		0	bias	0.0069	CSF1,ILK,SPARC,TGFB2
CREB1		transcription regulator	Activated	2.608	bias	0.00704	AKAP13,APOE,GADD45B,HLA-A,JUNB,SERINC2,TAGLN2,Tpm4	10 (2)
K-252		chemical drug				0.0071	PPP1R1B,SPP1	48 (9)
dehydroisoandrosterone		chemical - endogenous mammalian				0.00731	IGF1,NFKBIA,PTP4A1
medroxyprogesterone acetate		chemical drug				0.00754	CD44,JUNB,LMNA,LTB
MYOD1		transcription regulator				0.00754	ANKRD1,IGF1,JUNB,KLF6,RRAS
TGFA		growth factor				0.00756	BIRC3,JUNB,S100A10	52 (7)
selumetinib		chemical drug				0.00764	DDX21,JUNB
BMPR2		kinase				0.00764	SEMA3C,SPP1
mir-142		microRNA				0.00764	IL6ST,NFKB2
DTX1		transcription regulator				0.00764	SPP1,TGFB2	46 (6)
VCP		enzyme				0.00764	LMNA,NFKB2
CCR1		G-protein coupled receptor				0.00764	SPARC,SPP1
ozone		chemical toxicant				0.00764	JUNB,SPP1
INS		other				0.0077	IGF1,JUNB,JUND,Tmsb4x (includes others)	66 (13)
bisphenol A		chemical - endogenous mammalian				0.0077	C3,F11R,IGF1,TGFB3	34 (8)
PP2/AG1879 tyrosine kinase inhibitor		chemical - kinase inhibitor				0.00782	BIRC3,CXCL16,SPP1	11 (5)
GMNN		transcription regulator				0.00782	FOXJ1,Oasl2,TGFB2
FBXO32		enzyme				0.00808	CCND2,ITGA3,KRT19
SPIB		transcription regulator				0.00808	APOE,Bst2,KLF6
NCF1		enzyme				0.00821	CD44,IGF1
JAK inhibitor I		chemical - kinase inhibitor				0.00821	C3,CCND2	29 (4)
PPARD		ligand-dependent nuclear receptor		0.464	bias	0.00844	APOE,CCND2,ILK,MFGE8,SERINC2
MAFB		transcription regulator				0.00862	ACTB,CD2AP,IGF1
amphetamine		chemical drug				0.00862	CD47,EZR,JUNB
dicarbethoxydihydrocollidine		chemical toxicant				0.00879	KRT19,SPP1
succinic acid		chemical - endogenous mammalian				0.00879	ANXA3,CD44
TFRC		transporter				0.0089	ANXA2,TGFB2,TGFB3
MAPK3		kinase				0.0089	JUNB,JUND,SPP1	45 (13)
Histone h3		group				0.00901	CCND2,FOXJ1,IFITM3,IGF1,NFKBIA,SPP1,Tpm4	52 (8)
IKBKE		kinase				0.00918	BIRC3,HLA-A,NFKBIA	55 (11)
IRF5		transcription regulator				0.00918	IFITM3,Oasl2,PLSCR1	30 (6)
NEDD9		other				0.00918	CD44,FOXJ1,TUBA1A
LLGL2		other				0.00938	ANKRD1,TGFB2
Focal adhesion kinase		group				0.00938	KRT18,KRT8
PRKDC		kinase				0.00938	APOE,BIRC3
PRKCI		kinase				0.00938	CLDN4,EZR
mir-23		microRNA				0.00938	IGF1,SPP1
ARRB1		other				0.00938	JUNB,SPP1	62 (16)
MAX		transcription regulator				0.00946	CCND2,GADD45B,KLF6
mir-29		microRNA				0.00946	IGF1,Tpm1,ZFP36L1	23 (3)
AHR		ligand-dependent nuclear receptor				0.0095	JAG1,JUNB,Mt2,SPP1,TGFB2,TGFB3	53 (10)
IGF2		growth factor				0.00969	IGF1,JUNB,NFKBIA,SPP1	74 (21)
4-aminopyrazolo(3,4-d)pyrimidine		chemical reagent				0.00973	APOE
Pdgfra-Pdgfrb		complex				0.00973	CSF1
GMNC		other				0.00973	FOXJ1
LEPROT		other				0.00973	IGF1
MBNL3		other				0.00973	CD44
EPB42		transporter				0.00973	CD47
FAM168A		other				0.00973	NFKBIA
ADRM1		other				0.00973	NFKBIA
LEPROTL1		other				0.00973	IGF1
MEX3C		other				0.00973	IGF1
ADGRG1		G-protein coupled receptor				0.00973	IGF1
SETX		enzyme				0.00973	ACTB
lauroylcarnitine		chemical - endogenous mammalian				0.00973	CLDN4
Raet1a		other				0.00973	HLA-A
SPR		enzyme				0.00973	IGF1
AP1M1		transporter				0.00973	HLA-A
Til1		other				0.00973	SPP1
SETBP1		transcription regulator				0.00973	SET
AFM		transporter				0.00973	APOE
CELA1		peptidase				0.00973	HLA-A
cyproconazole		chemical drug				0.00973	GADD45B
AMD1		enzyme				0.00973	Tmsb4x (includes others)
IGFALS		other				0.00973	IGF1
miR-296-3p (miRNAs w/seed AGGGUUG)		mature microRNA				0.00973	JUNB
miR-637 (and other miRNAs w/seed CUGGGGG)		mature microRNA				0.00973	NUPR1
mir-663		microRNA				0.00973	HSPG2
mir-652		microRNA				0.00973	JAG1
miR-1195 (miRNAs w/seed GAGUUCG)		mature microRNA				0.00973	IGF1
lynestrenol		chemical drug				0.00973	APOE
Raet1d/Raet1e		other				0.00973	HLA-A
cobimetinib		chemical drug				0.00973	CD44
ING2		transcription regulator				0.00973	SPP1
RBM3		other				0.00973	CD44
ralimetinib		chemical drug				0.00973	SPP1
RHCE/RHD		transporter				0.00973	CD47
CDO1		enzyme				0.00973	IGF1
APOC1		transporter				0.00973	APOE
E-c-HDMAPP		chemical reagent				0.00973	CCND2
(S)-flurbiprofen		chemical drug				0.00973	JUNB
LFM-A13		chemical - kinase inhibitor				0.00973	CCND2
oxazepam		chemical drug				0.00973	GADD45B
chalcone-24		chemical reagent				0.00973	BIRC3
trichosanthin		chemical drug				0.00973	JAG1
lanreotide		biologic drug				0.00973	IGF1
22-hydroxycholesterol		chemical - endogenous mammalian				0.00973	APOE
CFB		peptidase				0.01	C3,TGFB2
PTH1R		G-protein coupled receptor				0.01	CSF1,SPP1
Rhox5		transcription regulator				0.01	TMEM176A,TMEM176B
IFRD1	0.282	other				0.01	IGF1,SPP1
Hmgn3		other				0.01	AMBP,TTR
ZFP36		transcription regulator				0.0101	BIRC3,NFKBIA,SPP1
R5020		chemical reagent				0.0101	BIRC3,NFKBIA,PPP1R1B
LDL		complex		0.794	bias	0.0102	APOBEC3B,APOE,C3,IGF1,RABEP1
SLC13A1		transporter				0.0104	ACTG1,IGF1,SPP1
NRG1		growth factor				0.0106	ANKRD1,CCND2,JUNB,JUND,TGFB2
UXT		transcription regulator				0.0106	KRT18,NFKBIA
TAB1		enzyme				0.0106	BIRC3,NFKBIA
vorinostat		chemical drug		-0.585		0.0109	BIRC3,BNIP2,CCND2,MFGE8,NFKBIA
miR-291a-3p (and other miRNAs w/seed AAGUGCU)		mature microRNA				0.011	C3,CCND2,CD44
ATF2		transcription regulator				0.011	ACTB,NUPR1,TGFB2
Fgf		group				0.0113	IGF1,JUNB
HLX		transcription regulator				0.0113	ANKRD1,CD44
MMP14		peptidase				0.0113	BCAM,JAG1
honokiol		chemical - endogenous non-mammalian				0.0113	CCND2,JUNB
miR-125b-5p (and other miRNAs w/seed CCCUGAG)		mature microRNA				0.0113	CD44,KRT19,PIGR
NR1H4		ligand-dependent nuclear receptor				0.0113	AMBP,APOE,C3,SPP1
fulvestrant		chemical drug		0.52		0.0114	C3,COMT,CSF1,IGF1,TGFB2
THRB		ligand-dependent nuclear receptor				0.0114	BIRC3,CCND2,ILK,Oasl2,SPP1
TBK1		kinase				0.0116	APOBEC3B,Oasl2,SLCO3A1
BRCA1		transcription regulator				0.0118	ACTB,EZR,GADD45B,PLSCR1
flutamide		chemical drug				0.0119	IGF1,IL6ST,SLCO3A1
IGF2BP1		translation regulator				0.0119	ACTB,CD44
ELF4		transcription regulator				0.0119	PLEC,SPP1
bryostatin 1		chemical drug				0.0119	BIRC3,CD44
LGALS3		other				0.0123	IGF1,KRT18,KRT19
phosphate		chemical - endogenous mammalian				0.0123	AMBP,PLEC,SPP1
lysophosphatidic acid		chemical - other				0.0126	ANKRD1,CSF1,JUNB
NFAT5		transcription regulator				0.0126	CXCL16,NFKBIA,SPP1
SETD2		enzyme				0.0126	IGF1,SEMA3C
ITGAM		transmembrane receptor				0.0126	APOE,TTR
formaldehyde		chemical - endogenous mammalian				0.0126	JUNB,JUND
E. coli serotype 0127B8 lipopolysaccharide		chemical - endogenous non-mammalian		1.067	bias	0.0127	CXCL16,IGF1,NFKBIA,PPP1R1B
dextran sulfate		chemical drug				0.0128	C3,IFITM3,PIGR,TGFB2,TGFB3
15-deoxy-delta-12,14 -PGJ 2		chemical - endogenous mammalian		-0.085	bias	0.0129	BIRC3,CCND2,NFKBIA,SPP1
ESRRA		ligand-dependent nuclear receptor				0.0129	KRT19,PPP1R1B,SPP1,TGFB3
MKNK1		kinase				0.0133	ANXA2,IFRD1,SPARC
TNFSF10		cytokine				0.0133	BIRC3,HLA-A,NFKBIA
Ap2		group				0.0133	C3,TGFB3
asoprisnil		chemical drug				0.0133	IGF1,TGFB3
CRNDE		other				0.0133	GADD45B,RRAS
ETV4		transcription regulator				0.0133	PLEC,SPP1
8-bromo-cAMP		chemical reagent		0.152	bias	0.0134	IGF1,KRT8,SPP1,TGFB2
ionomycin		chemical reagent		0.083	bias	0.0134	AHNAK,CCND2,CLDN4,SPP1
IRF1		transcription regulator		0.832	bias	0.0136	CXCL16,IFITM3,LTB,PIGR
STK11		kinase	Activated	2.236		0.0137	GADD45B,JUNB,LTB,NFKB2,SPP1
TFAP2A		transcription regulator				0.014	APOE,BIRC3,DCLK1
NPM1		transcription regulator				0.0141	CSF1,IL6ST
TRH		other				0.0141	ACTB,JUNB
CTF1		cytokine				0.0141	IL6ST,JUNB
IL27RA		transmembrane receptor				0.0141	CD44,LTB
istradefylline		chemical drug				0.0146	PPP1R1B
hyodeoxycholic acid		chemical - endogenous mammalian				0.0146	APOE
AMOT		other				0.0146	ANKRD1
Gα12/13		group				0.0146	IGF1
ARF4		enzyme				0.0146	CLDN4
AGPAT1		enzyme				0.0146	IGF1
ITGBL1		other				0.0146	CD44
AMOTL1		other				0.0146	ANKRD1
OSR2		transcription regulator				0.0146	TGFB3
KLHL21		other				0.0146	NFKBIA
CNDP2		peptidase				0.0146	CD44
Ap1 gamma		group				0.0146	HLA-A
methylamphotericin B		chemical drug				0.0146	SPP1
Raet1b		other				0.0146	HLA-A
SERTAD1		transcription regulator				0.0146	SET
PLEC	0.253	other				0.0146	KRT18
PSMC5		transcription regulator				0.0146	CCND2
YARS1		enzyme				0.0146	NFKBIA
RIMS2		other				0.0146	IGF1
PHIP		other				0.0146	CCND2
riociguat		chemical drug				0.0146	SPP1
H60a		other				0.0146	HLA-A
PBK		kinase				0.0146	BIRC3
SLC3A2		transporter				0.0146	ANKRD1
IFI30		enzyme				0.0146	HLA-A
AHNAK	0.458	other				0.0146	CCND2
S100A1		other				0.0146	TUBA1A
IGF2BP3		translation regulator				0.0146	CD44
MBD5		other				0.0146	IGF1
NEURL1		enzyme				0.0146	JAG1
ATF7IP		transcription regulator				0.0146	JUND
ALPL		phosphatase				0.0146	SPP1
DDX4		enzyme				0.0146	IFITM3
RNH1		other				0.0146	ILK
NPHS2		other				0.0146	CD2AP
INHBC		growth factor				0.0146	JUNB
ERC1		other				0.0146	NFKBIA
Lycium barbarum polysaccharides		chemical - endogenous non-mammalian				0.0146	IGF1
Ewsr1		other				0.0146	LMNA
WASF1		other				0.0146	EZR
4-ethylsulfanylphenylmethylene hydantoin		chemical reagent				0.0146	CD44
4-hydroxyphenylmethylene hydantoin		chemical reagent				0.0146	CD44
C20-D3-vitamin A		chemical drug				0.0146	C3
iCRT14		chemical reagent				0.0146	CD47
polyhydroxyethyl methacrylate		chemical reagent				0.0146	EZR
natamycin		chemical drug				0.0146	SPP1
tarenflurbil		chemical drug				0.0146	JUNB
(S)-duloxetine		chemical drug				0.0146	ACTB
palmitoylcarnitine		chemical - endogenous mammalian				0.0146	CLDN4
3,4-dihydroxybenzaldehyde		chemical - endogenous non-mammalian				0.0146	CCND2
salsalate		chemical drug				0.0146	NFKBIA
GKT137831		chemical drug				0.0146	CD44
protamine zinc insulin		biologic drug				0.0146	IGF1
2-amino-3-phosphonopropionic acid		chemical - endogenous mammalian				0.0146	JUNB
mir-8		microRNA		-1.179	bias	0.0146	CCND2,CD47,KRT19,TGFB2
miR-1-3p (and other miRNAs w/seed GGAAUGU)		mature microRNA		-1.969	bias	0.0146	ANXA2,IGF1,TAGLN2,Tmsb4x (includes others)
arachidonic acid		chemical - endogenous mammalian				0.0148	KLF6,NFKBIA,SPP1
STAT		group				0.0148	IL6ST,JUNB
CASZ1		enzyme				0.0148	PPP1R1B,TGFB3
mir-19		microRNA				0.0148	CCND2,RNF11
TWIST2		transcription regulator				0.0148	CD44,KLF6
KRT14		other				0.0148	KRT18,KRT8
thalidomide		chemical drug				0.0148	BIRC3,GADD45B
steroid		chemical - endogenous mammalian				0.0148	IGF1,SPP1
INHBA		growth factor		0.737	bias	0.0149	ANKRD1,CCND2,IGF1,JUNB
bexarotene		chemical drug		-0.218	bias	0.0151	APOE,BNIP2,SPARC,TGFB2
5-N-ethylcarboxamido adenosine		chemical reagent				0.0155	CES1,JUNB,KLF6
CYLD		transcription regulator				0.0155	NFKB2,RELB
TFAP4		transcription regulator				0.0155	CD44,CLDN4
DICER1		enzyme				0.0157	CCND2,CD44,SEMA3C,SPARC,Tpm1
PAX3		transcription regulator				0.0159	HSPG2,NFKB2,PTP4A1,TGFB2
BRAF		kinase				0.0162	BCAM,BIRC3,CSF1,HSPG2
4-methylnitrosoamino-1-(3-pyridinyl)-1-butanone		chemical toxicant				0.0163	JUNB,SPP1
uranyl nitrate		chemical toxicant				0.0163	Mt2,SPP1,TAGLN2
pyrrolidine dithiocarbamate		chemical reagent				0.0163	BIRC3,IGF1,NFKBIA
NR5A2		ligand-dependent nuclear receptor				0.0167	C3,CXCL16,JUNB
phytohemagglutinin		chemical drug		0.655	bias	0.0167	CCND2,CD44,CD47,CSF1,SPP1
INSR		kinase				0.0169	ANKRD1,CCND2,IGF1,JUNB,NFKB2,TGFB3
CXCL12		cytokine		1.949	bias	0.017	CD44,CD47,JUNB,RRAS
PP1		chemical - kinase inhibitor				0.0171	CCND2,CXCL16
NORAD		other				0.0171	GADD45B,JUNB
RCE1		peptidase				0.0171	LMNA,TGFB2
HSPA9		other				0.0171	KRT18,KRT8
RUVBL1		transcription regulator				0.0171	CCND2,GADD45B
TNIP1		other				0.0171	HLA-A,RELB
ANXA1		enzyme				0.0171	ANXA2,CSF1
propranolol		chemical drug				0.0171	IGF1,NFKBIA
EFNA4		kinase				0.0179	KRT18,KRT7
NFIB		transcription regulator				0.0179	FOXJ1,KRT8
fasudil		chemical drug				0.0179	TGFB2,TGFB3
cyclopamine		chemical reagent				0.0179	SPARC,SPP1
RET		kinase				0.0179	CSF1,RNF11,RNF19A
Esrra		transcription regulator				0.0179	PPP1R1B,SPP1,TGFB3
GNA15		enzyme				0.0179	C3,TGFB3,ZFP36L1
Ins1		other		1.471	bias	0.0185	ACTB,IGF1,IL6ST,JUNB,SPARC
IL10RA		transmembrane receptor		-1.387		0.0185	C3,HLA-A,RNF213,SPARC,TTR
JAK		group				0.0187	IFITM3,IGF1
HES3		transcription regulator				0.0187	MFGE8,TUBA1A
Laminin (complex)		complex				0.0187	BIRC3,TGFB2
IRAK1		kinase				0.0187	CXCL16,RELB
EFNA3		kinase				0.0187	KRT18,KRT7
SRSF2		transcription regulator				0.0187	CES1,Tmsb4x (includes others)
CDK2AP1		other				0.0187	CCND2,DAAM1
verapamil		chemical drug				0.0187	ANXA2,S100A10
D-galactosamine		chemical - endogenous mammalian				0.0187	JUNB,JUND
EIF4E		translation regulator		1.964	bias	0.0187	Bst2,CXCL16,HLA-A,NFKBIA
KIT		transmembrane receptor				0.0188	CCND2,CD44,SPP1
losartan potassium		chemical drug				0.0188	SPP1,TGFB2,TGFB3
KDM1A		enzyme		-1.091		0.019	Bst2,CCND2,KRT18,KRT8
BTK		kinase				0.0192	CCND2,NFKB2,RELB
arsenite		chemical toxicant				0.0192	IGF1,Mt2,TGFB2
PD 180970		chemical - kinase inhibitor				0.0194	CCND2
tyrosine kinase		group				0.0194	CD44
Carlr		other				0.0194	NFKB2
AMOTL2		other				0.0194	ANKRD1
UTP3		other				0.0194	CCND2
ITPRID2		other				0.0194	IGF1
receptor protein tyrosine kinase		group				0.0194	SPP1
ZNF24		transcription regulator				0.0194	CCND2
cathepsin L inhibitor		chemical drug				0.0194	C3
MAF1		other				0.0194	ACTB
XRN2		enzyme				0.0194	ACTB
proanthocyanidin derivative		chemical - other				0.0194	MFGE8
NXF1		other				0.0194	CD44
glucuronyl glucosamine glycan sulfate		chemical drug				0.0194	HSPG2
Nc2		complex				0.0194	HLA-A
ENPP1		enzyme				0.0194	SPP1
PKIA		other				0.0194	IGF1
UFD1		peptidase				0.0194	NFKB2
Nppb		other				0.0194	TGFB3
miR-328-3p (and other miRNAs w/seed UGGCCCU)		mature microRNA				0.0194	CD44
miR-330-5p (and other miRNAs w/seed CUCUGGG)		mature microRNA				0.0194	CD47
LAMB1		other				0.0194	JAG1
ANKH		transporter				0.0194	SPP1
GCLC		enzyme				0.0194	JUNB
NPLOC4		other				0.0194	NFKB2
parbendazole		chemical reagent				0.0194	SPP1
PTCH2		transmembrane receptor				0.0194	JAG1
WARS1		enzyme				0.0194	NFKBIA
RAPGEF4		other				0.0194	SPP1
2-[[4-[(e)-styryl]phenoxy]methyl]oxirane		chemical reagent				0.0194	APOE
ZKSCAN3		transcription regulator				0.0194	CCND2
SLC20A2		transporter				0.0194	SPP1
OSU-CG12		chemical reagent				0.0194	KLF6
griseofulvin		chemical drug				0.0194	KRT18
phenylacetic acid		chemical - endogenous mammalian				0.0194	HLA-A
apicularen A		chemical reagent				0.0194	NFKBIA
atipamezole		chemical drug				0.0194	JUNB
NSC719239		chemical drug				0.0194	ITGA3
tirapazamine		chemical drug				0.0194	SPP1
(-)-isoproterenol		chemical drug				0.0194	CD44
sodium phosphate		chemical drug				0.0194	SPP1
1,1-diethyl-2-hydroxy-2-nitrosohydrazine		chemical toxicant				0.0194	NFKBIA
sertindole		chemical drug				0.0194	ACTB
durapatite		chemical - endogenous mammalian				0.0194	SPP1
gemcabene		chemical drug				0.0194	APOE
DP-001		chemical drug				0.0194	SPP1
cholesterol ester		chemical - endogenous mammalian				0.0194	CES1
ZNF106		other				0.0195	C3,IFITM3
ANGPT1		growth factor				0.0195	ILK,JAG1
SKIL		transcription regulator				0.0195	PLSCR1,Tpm1
diphtheria toxin		chemical - endogenous non-mammalian				0.0197	Gm12854/S100a11,RELB,S100A10
Tlr		group				0.0197	HLA-A,JAG1,NFKBIA
GH1		growth factor				0.0197	IGF1,JUNB,SPP1
sirolimus		chemical drug	Inhibited	-2.577	bias	0.0197	ACTB,CCND2,CSF1,JUNB,LMNA,PSMD11,PTP4A1
Collagen(s)		complex				0.0204	ACTB,C3
RBM5		other				0.0204	BIRC3,IFITM3
DLL4		other				0.0204	NFKB2,RELB
EFNA5		kinase				0.0204	KRT18,KRT7
HDAC6		transcription regulator				0.0204	IGF1,JUNB
PCGF2		transcription regulator				0.0204	CCND2,JAG1
N-[N-(3,5-difluorophenacetyl-L-Ala)]-S-phenylglycine t-butyl ester		chemical - protease inhibitor				0.0204	CSF1,RELB
NFE2L2	0.27	transcription regulator	Activated	2.433	bias	0.0205	ACTG1,IFRD1,LMNA,PSMD11,Tpm1,TTR
JQ1		chemical reagent				0.021	BIRC3,NFKB2,Oasl2
BMP4		growth factor	Activated	2	bias	0.0212	JUNB,KRT7,NUPR1,SPARC
VitaminD3-VDR-RXR		complex				0.0212	SPP1,TGFB2
STK40		kinase				0.0212	APOE,PDPN
KLF1		transcription regulator				0.0212	BCAM,CD44
MEF2A		transcription regulator				0.0212	TGFB2,TGFB3
Hbb-b2		other				0.0212	CD44,LTB
PRKACA		kinase				0.0212	CCND2,IGF1
isobutylmethylxanthine		chemical toxicant				0.0218	CD44,ITGA3,JUNB,Mt2
RAF1		kinase				0.0218	ANKRD1,CD44,PLEC,Tpm1
mifepristone		chemical drug	Activated	2.086		0.0219	APOE,C3,JUNB,NFKBIA,SPP1
Hsp27		group				0.0221	CSF1,PPP1R1B
SATB2		transcription regulator				0.0221	KRT8,SPP1
IFNA4		cytokine				0.0221	Bst2,SLCO3A1
KDR		kinase				0.0221	ANXA2,SET
GSK2816126		chemical drug				0.0221	SPARC,SPP1
quinolinic acid		chemical - endogenous mammalian				0.0221	JUNB,JUND
PSMB11		peptidase				0.0224	CLDN4,GADD45B,TGFB2
SRC		kinase				0.0224	CCND2,KRT18,SPP1
MIF		cytokine				0.0224	CD44,CXCL16,IL6ST
PELP1		other				0.0229	CDC42EP5,CES1,MYADM
lysophosphatidylinositol		chemical - endogenous mammalian				0.023	C3,LTB
PROC		peptidase				0.023	DDX21,NFKB2
IFIH1		enzyme				0.023	Bst2,NFKBIA
N-formyl-Met-Leu-Phe		chemical reagent				0.023	NFKBIA,TAGLN2
zVAD-FMK		chemical - protease inhibitor				0.023	BIRC3,IL6ST
benzo(a)pyrene		chemical toxicant				0.0235	COMT,IGF1,Mt2,TGFB2
KLF3		transcription regulator	Inhibited	-2.236	bias	0.0237	AHNAK,APOE,MYADM,NEURL3,TUBA1A
tanespimycin		chemical drug				0.0238	BIRC3,KRT18,KRT8
PAF1		other				0.0239	BIRC3,IFITM3
SCARB1		transporter				0.0239	APOE,SPP1
IRF9		transcription regulator				0.0239	IFITM3,Oasl2
TXN		enzyme				0.0239	CCND2,NFKBIA
globotriaosylceramide		chemical - endogenous mammalian				0.0242	CD44
ADRA1		group				0.0242	JUNB
Erm		group				0.0242	CD44
edratide		biologic drug				0.0242	CD44
Ho		group				0.0242	SPARC
1,2,3,4,6,7,8-heptachlorodibenzofuran		chemical toxicant				0.0242	COMT
SMPD3		enzyme				0.0242	IGF1
anthralin		chemical drug				0.0242	KRT18
MARCHF3		other				0.0242	NFKBIA
TRIM29		transcription regulator				0.0242	CD44
ZMIZ2		transcription regulator				0.0242	CD44
SNHG3		other				0.0242	CCND2
Cathepsin		group				0.0242	CCND2
CSF		group				0.0242	C3
MAP4K1		kinase				0.0242	BIRC3
ZIC1		transcription regulator				0.0242	APOE
FZD7		G-protein coupled receptor				0.0242	CD44
miR-615-5p (and other miRNAs w/seed GGGGUCC)		mature microRNA				0.0242	KRT19
miR-873-5p (and other miRNAs w/seed CAGGAAC)		mature microRNA				0.0242	CD44
NACA		transcription regulator				0.0242	PDPN
GAS7		transcription regulator				0.0242	SPP1
PSAP		enzyme				0.0242	BIRC3
KCTD11		other				0.0242	CCND2
NUDT21		other				0.0242	SPARC
PFN1		other				0.0242	ANXA2
RPS3		enzyme				0.0242	NFKBIA
GTF2H4		transcription regulator				0.0242	CCND2
BCAR3		other				0.0242	RRAS
CITED1		transcription regulator				0.0242	IGF1
VCAM1		transmembrane receptor				0.0242	CD44
SRSF6		other				0.0242	LMNA
ADAM9		peptidase				0.0242	ITGA3
Foxp2		transcription regulator				0.0242	PDPN
Cox5b		other				0.0242	TGFB2
Foxe3		transcription regulator				0.0242	TTR
RFXANK		transcription regulator				0.0242	HLA-A
GCLM		enzyme				0.0242	JUNB
Z-endoxifen		chemical - endogenous mammalian				0.0242	IGF1
tideglusib		chemical drug				0.0242	IGF1
2,3,7,8-tetrachlorodibenzofuran		chemical toxicant				0.0242	COMT
4-aminophenol		chemical - endogenous mammalian				0.0242	SPP1
retinaldehyde		chemical - endogenous mammalian				0.0242	CD44
HMOX1		enzyme				0.0243	IGF1,SPARC,TGFB2
PAX3-FOXO1		fusion gene/product		0		0.0245	CCND2,CSF1,IL6ST,SPP1
8-chlorophenylthio-adenosine 3',5'-cyclic monophosphate		chemical - kinase inhibitor				0.0257	BIRC3,IGF1
ROCK2		kinase				0.0257	CD44,SPP1
beta-naphthoflavone		chemical toxicant				0.0257	APOE,SLCO3A1
IRS1		enzyme				0.0264	IGF1,NFKBIA,SPP1
palmitic acid		chemical - endogenous mammalian				0.0267	BIRC3,IGF1,Mt2,NFKBIA
ZBTB20		transcription regulator				0.0267	IGF1,NFKBIA
panobinostat		chemical drug				0.0267	CCND2,PPP1R1B
IDH1		enzyme				0.0267	CD47,TGFB2
RTN4		other				0.0267	JUND,Tpm1
mir-223		microRNA				0.0274	CSF1,IGF1,Mt2
miR-34a-5p (and other miRNAs w/seed GGCAGUG)		mature microRNA				0.0274	CD47,JAG1,SLCO3A1
SFRP1		transmembrane receptor				0.0276	KRT18,TGFB2
EIF2S1		translation regulator				0.0276	IFRD1,NUPR1
GHR		transmembrane receptor				0.0276	IGF1,SPP1
ATN1		transcription regulator				0.0279	ATP1B3,SPP1,Tmsb4x (includes others)
streptozocin		chemical drug		-1.046		0.0282	HSPG2,IGF1,JAG1,SPP1
cholesterol		chemical - endogenous mammalian				0.0285	APOE,CES1,CSF1,Tpm1
GRB2		other				0.0286	KRT7,LTB
LMNB1		other				0.0286	LMNA,TGFB2
MMP1		peptidase				0.0286	IGF1,NFKBIA
iron		chemical - endogenous mammalian				0.0286	CCND2,GADD45B
pervanadate		chemical reagent				0.0289	NFKBIA
Rp-8-pCPT-cGMPS-triethylamine		chemical reagent				0.0289	S100A10
Cobra Venom Factor		chemical - endogenous non-mammalian				0.0289	TGFB2
etretinate		chemical drug				0.0289	KRT18
N-hexanoylhomoserine lactone		chemical - endogenous non-mammalian				0.0289	CSF1
LRRC26		ion channel				0.0289	LTB
BICC1		other				0.0289	PIGR
VIPAS39		other				0.0289	SPARC
USP48		peptidase				0.0289	CCND2
HMG20A		transcription regulator				0.0289	KRT18
YOD1		enzyme				0.0289	ANKRD1
PIWIL4		other				0.0289	TGFB3
BPIFB1		other				0.0289	NFKBIA
RO4929097		chemical drug				0.0289	JAG1
Msx3		transcription regulator				0.0289	IGF1
ERAP1		peptidase				0.0289	HLA-A
LINC01234		other				0.0289	NUPR1
CR1		transmembrane receptor				0.0289	C3
Pzp		other				0.0289	APOE
FES		kinase				0.0289	CSF1
HAS1		enzyme				0.0289	CD44
mir-637		microRNA				0.0289	NUPR1
miR-320b (and other miRNAs w/seed AAAGCUG)		mature microRNA				0.0289	IGF1
EGFL7		other				0.0289	NFKBIA
SOX18		transcription regulator				0.0289	IL6ST
ERCC1		enzyme				0.0289	IGF1
TAF10		transcription regulator				0.0289	IGF1
ETV3		transcription regulator				0.0289	SPP1
LIMS2		other				0.0289	ILK
UTRN		transmembrane receptor				0.0289	ACTG1
TFF2		other				0.0289	CCND2
YWHAB		other				0.0289	BCAM
EPHA4		kinase				0.0289	IGF1
ITGA11		other				0.0289	IGF1
CLEC4M		other				0.0289	C3
Npy4r		G-protein coupled receptor				0.0289	IGF1
CXXC4		other				0.0289	SPARC
ERCC3		enzyme				0.0289	IGF1
MIA-459		chemical reagent				0.0289	NFKB2
MIA-313		chemical reagent				0.0289	NFKB2
gelam honey		chemical reagent				0.0289	NFKBIA
Congo Red		chemical toxicant				0.0289	C3
6,7-dinitroquinoxaline-2,3-dione		chemical reagent				0.0289	JUNB
6-cyano-7-nitroquinoxaline-2,3-dione		chemical reagent				0.0289	JUNB
zonisamide		chemical drug				0.0289	Mt2
saquinavir		chemical drug				0.0289	NFKBIA
BB-Cl-amidine		chemical reagent				0.0289	IGF1
ZFA-fmk		chemical reagent				0.0289	C3
Z-VEID-FMK		chemical reagent				0.0289	CCND2
zofenopril		chemical drug				0.0289	CSF1
quisqualic acid		chemical - endogenous non-mammalian				0.0289	JUNB
oblimersen		biologic drug				0.0296	GADD45B,IFRD1
WWTR1		transcription regulator				0.0296	CD44,SPP1
MOG		other				0.0296	CD44,IGF1
CASP8		peptidase				0.0296	CD44,CSF1
PLAG1		transcription regulator				0.0296	KRT19,PLEC
IL2RG		transmembrane receptor				0.0296	HLA-A,LTB
Ccl2		cytokine				0.0296	CSF1,IGF1
enalapril		biologic drug				0.0296	CLDN4,SPP1
anisomycin		chemical - endogenous non-mammalian				0.0296	JUNB,SPP1
bicuculline		chemical - endogenous non-mammalian				0.0296	GADD45B,JUNB
ACSL4		enzyme				0.0306	KRT18,SPP1
EBI3		cytokine				0.0306	CCND2,HLA-A
FOXM1		transcription regulator				0.0307	CCND2,IGF1,NFKB2
mibolerone		chemical drug				0.0307	AHNAK,IGF1,TUBA1A
GNAS		enzyme				0.0316	SPARC,SPP1
MAP2K7		kinase				0.0316	BIRC3,JUNB
GNRH1		other				0.0316	IGF1,JUNB
EFNA2		kinase				0.0316	KRT18,KRT7
SOCS1		other				0.0318	CCND2,CD44,Oasl2
SP110		transcription regulator				0.0318	IFITM3,LMNA,PLSCR1
TET2		enzyme				0.0324	AHNAK,ANXA2,IFITM3
ADRB		group				0.0324	ANKRD1,JUNB,NFKBIA
ritonavir		chemical drug				0.0324	CCND2,IFRD1,PLEC
MAP2K4		kinase				0.0326	BIRC3,CD44
THPO		cytokine				0.0326	CCND2,CD44
ZEB2		transcription regulator				0.0326	KRT18,KRT19
POU2AF1		transcription regulator				0.0326	S100A10,SPP1
N-methyl-D-aspartate		chemical drug				0.0326	C3,CD47
HDAC2		transcription regulator				0.033	IGF1,Mt2,NFKBIA
24(S),25-epoxycholesterol		chemical - endogenous mammalian				0.0337	APOE
triamcinolone		chemical drug				0.0337	APOE
nicotinic acetylcholine receptor		complex				0.0337	JUNB
RIOX1		enzyme				0.0337	IGF1
ZNF100		transcription regulator				0.0337	TGFB3
ZNF85		transcription regulator				0.0337	TGFB3
ZNF652		other				0.0337	TGFB2
ZNF254		transcription regulator				0.0337	TGFB3
AKIRIN2		other				0.0337	CCND2
RASSF8		other				0.0337	TGFB3
FIRRE		other				0.0337	CSF1
ATE1		enzyme				0.0337	ACTB
ZNF431		transcription regulator				0.0337	TGFB3
SNED1		other				0.0337	IGF1
B-cell receptor		complex				0.0337	CCND2
sotrastaurin		chemical drug				0.0337	NFKBIA
SERPINC1		enzyme				0.0337	HSPG2
IER3	0.276	other				0.0337	BIRC3
SNTA1		other				0.0337	IGF1
miR-542-3p (miRNAs w/seed GUGACAG)		mature microRNA				0.0337	ILK
mir-320		microRNA				0.0337	IGF1
MYCBP		transcription regulator				0.0337	CCND2
ZNF665		other				0.0337	TGFB3
DLC1		other				0.0337	S100A10
ZNF528		other				0.0337	TGFB3
DAB1		other				0.0337	ITGA3
PIK3C3		kinase				0.0337	HLA-A
KHDRBS1		transcription regulator				0.0337	CD44
IGFBP4		other				0.0337	IGF1
G3BP1		enzyme				0.0337	SPP1
PTPRS		phosphatase				0.0337	IGF1
ZNF43		transcription regulator				0.0337	TGFB3
ZNF429		transcription regulator				0.0337	TGFB3
FZD5		G-protein coupled receptor				0.0337	SPP1
ISG15	0.393	other				0.0337	IFITM3
TP53INP1		other				0.0337	SPARC
CUL1		enzyme				0.0337	CCND2
PLA2G2A		enzyme				0.0337	CD44
MED13L		other				0.0337	ANKRD1
CAPNS1		peptidase				0.0337	CCND2
MS4A1		other				0.0337	ZFP36L1
ITGB8		other				0.0337	APOE
ZNF708		other				0.0337	TGFB3
thenoyltrifluoroacetone		chemical reagent				0.0337	BIRC3
diquat		chemical toxicant				0.0337	Mt2
AR-A014418		chemical reagent				0.0337	CD44
aminoglutethimide		chemical drug				0.0337	SPP1
CHS-828		chemical drug				0.0337	CD44
gliotoxin		chemical toxicant				0.0337	BIRC3
polyphosphate		chemical - endogenous mammalian				0.0337	SPP1
non-esterified fatty acid		chemical - endogenous mammalian				0.0337	APOE
acolbifene		chemical drug				0.0337	TGFB3
20alpha-hydroxycholesterol		chemical - endogenous mammalian				0.0337	APOE
CNR1		G-protein coupled receptor				0.0347	APOE,IGF1,PLSCR1
lovastatin		chemical drug				0.0347	APOE,IGF1,LMNA
PTGES		enzyme				0.0347	ANXA2,EZR
dalfampridine		chemical drug				0.0347	GADD45B,JUNB
cadmium chloride		chemical toxicant				0.0347	Mt2,TGFB3
capsaicin		chemical drug				0.0347	IGF1,TGFB2
methylselenic acid		chemical reagent				0.0351	BIRC3,CD44,IGF1,JUNB
IL7		cytokine				0.0353	CCND2,CSF1,LTB
morphine		chemical drug				0.0353	CD2AP,JUNB,SPARC
STUB1		enzyme				0.0358	JUNB,NFKB2
HIC1		transcription regulator				0.0358	PLEC,SPP1
MITF		transcription regulator		0	bias	0.0364	APOE,CD44,ITGA3,SEMA3C
E2F1		transcription regulator		0.468	bias	0.0365	CCND2,CD2AP,CD44,IGF1,ILK,NFKBIA
miR-204-5p (and other miRNAs w/seed UCCCUUU)		mature microRNA				0.0369	SPARC,TGFB3
NUPR1	0.435	transcription regulator		1.342	bias	0.0377	APOBEC3B,KLF6,NUPR1,RELB,SAMD4A,ZFP36L1
USF2		transcription regulator				0.038	PIGR,SPP1
IL6ST	0.275	transmembrane receptor				0.038	CD44,JUNB
CLOCK		transcription regulator				0.0382	GADD45B,Gm12854/S100a11,JUNB,RNF11
Vhl		complex				0.0384	BIRC3
L-phenylalanine		chemical - endogenous mammalian				0.0384	TTR
saikosaponin A		chemical reagent				0.0384	JUNB
pyrophosphate		chemical - endogenous mammalian				0.0384	SPP1
GCS-100		chemical drug				0.0384	CCND2
L-type Calcium Channel		complex				0.0384	APOE
citrinin		chemical toxicant				0.0384	JUNB
TFIIA		complex				0.0384	CCND2
Retinoic acid-RAR-RXR		complex				0.0384	TGFB2
SLC39A14		transporter				0.0384	IGF1
ADGRF5		G-protein coupled receptor				0.0384	CSF1
NELFCD		other				0.0384	JUNB
IL-2R		complex				0.0384	CCND2
evofosfamide		chemical drug				0.0384	CCND2
PDLIM7		other				0.0384	SPP1
MIA		other				0.0384	SPARC
SLC25A4		transporter				0.0384	BIRC3
STC1		kinase				0.0384	TGFB2
ERCC4		enzyme				0.0384	IGF1
miR-192-5p (and other miRNAs w/seed UGACCUA)		mature microRNA				0.0384	IGF1
mir-326		microRNA				0.0384	CD47
miR-138-5p (miRNAs w/seed GCUGGUG)		mature microRNA				0.0384	KRT19
DKK2		other				0.0384	SPP1
MTBP		other				0.0384	CCND2
SMN1/SMN2		other				0.0384	IGF1
GRIP1		transcription regulator				0.0384	IGF1
KSR1		kinase				0.0384	Tpm1
LAMA4		enzyme				0.0384	JAG1
FBXL5		enzyme				0.0384	Mt2
CLTC		other				0.0384	HLA-A
GRB10		other				0.0384	IGF1
BMP5		growth factor				0.0384	CCND2
PPP1CA		phosphatase				0.0384	SPP1
TAPBP		transporter				0.0384	HLA-A
CCX771		chemical reagent				0.0384	CD44
farnesyl transferase		complex				0.0384	KLF6
teasaponin		chemical - endogenous non-mammalian				0.0384	NFKBIA
Duxbl1 (includes others)		other				0.0384	Oasl2
DIABLO		other				0.0384	BIRC3
ZNF91		transcription regulator				0.0384	TGFB3
Rfx5		other				0.0384	HLA-A
VIPR2		G-protein coupled receptor				0.0384	JUNB
PCBP1		translation regulator				0.0384	CD44
ULBP1		transmembrane receptor				0.0384	HLA-A
MIA-602		chemical reagent				0.0384	IGF1
MM-401		chemical reagent				0.0384	KLF6
cariporide		chemical drug				0.0384	SPP1
magnesium sulfate		chemical drug				0.0384	NFKBIA
hypochlorous acid		chemical drug				0.0384	ITGA3
ETV6-NTRK3		fusion gene/product				0.0384	Oasl2
JNJ-39933673		chemical reagent				0.0384	SPP1
N-methyl-3,4-methylenedioxyamphetamine		chemical drug				0.0384	Mt2
P1,P4-Di(adenosine-5') tetraphosphate		chemical - endogenous mammalian				0.0384	TGFB2
tosyllysine chloromethyl ketone		chemical - protease inhibitor				0.0384	NFKBIA
26s Proteasome		complex				0.0384	BIRC3,JUNB,NFKB2
miR-17-5p (and other miRNAs w/seed AAAGUGC)		mature microRNA				0.0391	BNIP2,CCND2
BCL11B		transcription regulator				0.0391	LTB,PPP1R1B
Sn50 peptide		chemical toxicant				0.0391	APOE,BIRC3
LMNA	0.306	other				0.0391	JUND,KRT18,LMNA,SPP1
TLR3		transmembrane receptor		1.987	bias	0.04	C3,GADD45B,JUNB,Oasl2
12-(3-adamantan-1-yl-ureido) dodecanoic acid		chemical reagent				0.0402	BIRC3,BNIP2
NEUROG1		transcription regulator				0.0402	C3,CCND2
BCL2L1		other				0.0402	CD44,ITGA3
MUC1		other				0.0402	CCND2,NFKBIA
OTX2		transcription regulator				0.0402	SEMA3C,TTR
cyclic AMP		chemical - endogenous mammalian		-0.152	bias	0.0414	CCND2,IGF1,JUNB,PPP1R1B
IFNAR1		transmembrane receptor				0.0416	CSF1,HLA-A,Oasl2
ATP-gamma-S		chemical reagent				0.0425	C3,CSF1
levothyroxine		chemical - endogenous mammalian				0.0425	APOE,SEMA3C
MED1		transcription regulator				0.043	CCND2,IGF1,NFKBIA
RORC		ligand-dependent nuclear receptor				0.043	GADD45B,Mt2,SPARC
8,9-epoxyeicosatrienoic acid		chemical - endogenous mammalian				0.0431	CD44
16,16-dimethylprostaglandin E2		chemical - endogenous mammalian				0.0431	CD44
cholesterol sulfate		chemical - endogenous mammalian				0.0431	JUND
L-lysine		chemical - endogenous mammalian				0.0431	IGF1
RUNX1T1		transcription regulator				0.0431	CCND2
Mir218		microRNA				0.0431	SPP1
4-nonylphenol		chemical toxicant				0.0431	IGF1
(-)-epicatechin gallate		chemical - endogenous non-mammalian				0.0431	SPP1
APC/APC2		group				0.0431	JAG1
TGFBR		group				0.0431	CD44
Bcl9-Cbp/p300-Ctnnb1-Lef/Tcf		complex				0.0431	CD44
ESRP1		other				0.0431	CD44
ZBED2		other				0.0431	HLA-A
FBXO42		other				0.0431	CSF1
DKK3		cytokine				0.0431	WASF2
AFF4		transcription regulator				0.0431	Tmsb4x (includes others)
ZNF503-AS1		other				0.0431	KRT18
LRRC32		other				0.0431	TGFB3
HUWE1		transcription regulator				0.0431	CCND2
Ferritin		complex				0.0431	NFKBIA
SPTAN1		other				0.0431	ITGA3
ZIC2		transcription regulator				0.0431	APOE
PI3		other				0.0431	NFKBIA
ATG16L1		enzyme				0.0431	NFKBIA
PTGES3		enzyme				0.0431	NUPR1
HAS2		enzyme				0.0431	CD44
ING4		transcription regulator				0.0431	NFKBIA
NELFA		other				0.0431	JUNB
GHSR		G-protein coupled receptor				0.0431	IGF1
CD200R1		transmembrane receptor				0.0431	CXCL16
RTKN		other				0.0431	BIRC3
CD99		other				0.0431	JUND
ACTG1	0.325	other				0.0431	ACTB
BRMS1		transcription regulator				0.0431	SPP1
NELFE		other				0.0431	JUNB
asbestos		chemical toxicant				0.0431	JUNB
raltitrexed		chemical drug				0.0431	ANXA2
bupivacaine		chemical drug				0.0431	JUND
1,1-bis(3'-indolyl)-1-(4-trifluoromethyl-phenyl)methane		chemical reagent				0.0431	KRT18
ketorolac		chemical drug				0.0431	NFKBIA
NPM1-ALK		fusion gene/product				0.0431	CCND2
miR-182 inhibitor		chemical reagent				0.0431	NFKBIA
aurothioglucose		chemical drug				0.0431	SPARC
NFYB		transcription regulator				0.0434	ACTB,APOBEC3B,FLRT2,IGF1
Pro-inflammatory Cytokine		group				0.0436	APOE,CD47
Ngf		group				0.0436	ANXA2,TGFB2
CREBBP		transcription regulator		0.152	bias	0.0439	CCND2,CD44,CSF1,JUND,NFKBIA
Raf		group				0.0448	KRT18,SEMA3C
DOCK8		other				0.0448	CCND2,SLCO3A1
MSTN		growth factor				0.0448	IGF1,SPP1
PLAU		peptidase				0.0448	IGF1,RELB
SMARCA2		transcription regulator				0.0448	CD44,TUFT1
TBX21		transcription regulator				0.0448	IL6ST,SPP1
COLQ		other				0.0448	HSPG2,TGFB3
TNFRSF1A		transmembrane receptor				0.045	BIRC3,CD44,IGF1
clopidogrel		chemical drug				0.0459	IFRD1,NUPR1
UCP1		transporter				0.0464	AARS1,ANKRD1,NUPR1
PML		transcription regulator				0.0471	ACTG1,APOE,PLSCR1
DDX58		enzyme				0.0471	AHNAK,SPP1
GLI3		transcription regulator				0.0471	CCND2,JUNB
miR-21-5p (and other miRNAs w/seed AGCUUAU)		mature microRNA				0.0471	JAG1,TGFB2
SASH1		other				0.0471	CCND2,SLCO3A1
gemfibrozil		chemical drug				0.0471	APOE,NFKBIA
ethanol		chemical - endogenous mammalian		0.579	bias	0.0472	HLA-A,KLF6,PPP1R1B,TGFB2,TGFB3
1L-6-hydroxymethyl-chiro-inositol 2-(R)-2-O-methyl-3-O-octadecylcarbonate		chemical - kinase inhibitor				0.0477	CXCL16
TEAD		group				0.0477	CD44
voltage-gated calcium channel		complex				0.0477	CCND2
NAP1L1		other				0.0477	TTR
FTO		enzyme				0.0477	IGF1
PARP		group				0.0477	APOE
NEIL2		enzyme				0.0477	ACTB
ZNF503		other				0.0477	KRT18
Shc		group				0.0477	CCND2
DAZ2		translation regulator				0.0477	IFITM3
Sox2ot		other				0.0477	CD44
RSPO1		other				0.0477	CD44
IGF2R		transmembrane receptor				0.0477	TGFB3
SEMA4D		transmembrane receptor				0.0477	RRAS
Pvr		other				0.0477	CCND2
DAB2IP		other				0.0477	CD44
SPRY4-IT1		other				0.0477	F11R
NMNAT1		enzyme				0.0477	TGFB2
IL9R		transmembrane receptor				0.0477	JUNB
RYBP		transcription regulator				0.0477	CCND2
AFF1		transcription regulator				0.0477	IGF1
USP19		peptidase				0.0477	BIRC3
ANGPTL3		growth factor				0.0477	HSPG2
STX3		transporter				0.0477	ANKRD1
COPS8		other				0.0477	CCND2
TRAF1		other				0.0477	NFKB2
AEBP1		peptidase				0.0477	APOE
gamma-secretase inhibitor XX		chemical reagent				0.0477	JAG1
2-hydroxy-1-naphthylaldehyde isonicotinoyl hydrazone		chemical reagent				0.0477	CCND2
acetic acid		chemical - endogenous mammalian				0.0477	JUNB
polymyxin B		biologic drug				0.0477	APOBEC3B
perilla alcohol		chemical drug				0.0477	NFKBIA
PRKAG3		other				0.0478	ANKRD1,CES1,JUNB
linoleic acid		chemical - endogenous mammalian				0.0483	CD47,NFKBIA
RXRB		ligand-dependent nuclear receptor				0.0483	IGF1,SPP1
LGALS1		other				0.0483	CCND2,CXCL16
ATM		kinase				0.0483	ACTB,GADD45B
SATB1		transcription regulator				0.0485	ACTG1,GADD45B,RELB
IGF1R		transmembrane receptor				0.0495	ANKRD1,ANXA3,IGF1,KRT19
ONECUT1		transcription regulator				0.0495	AKAP13,AMBP,NFKBIA,TTR
heparin		chemical - endogenous mammalian				0.0495	APOE,IL6ST
LCK		kinase				0.0495	GADD45B,KRT18
SOX1		transcription regulator				0.0495	Oasl2,TGFB2
TRAF3IP2		other				0.0495	CSF1,CXCL16
androgen		chemical drug				0.0499	CD44,IGF1,NFKBIA

## Sheet: duct cluster 4-Dbmt1+Ly6d+ vs 4
© 2000-2020 QIAGEN. All rights reserved.
Upstream Regulator	Expr Log Ratio	Molecule Type	Predicted Activation State	Activation z-score	Flags	p-value of overlap	Target Molecules in Dataset	Mechanistic Network
ESR1		ligand-dependent nuclear receptor		-0.216		5.39e-08	APOE,ATP2A3,CALML4,CAMK2B,CLDN2,COTL1,CP,DCDC2,DSG2,Gsta4,ID1,LTF,MUC20,ONECUT2,PLS1,S100B,SERPINB5,SLC9A2,SORD,SULT1C2,TC2N,TFF2,TFF3,Tmsb4x (includes others),TNFAIP2,TNFRSF11B,UGT2B7	29 (2)
beta-estradiol		chemical - endogenous mammalian		1.751		1.11e-07	ANXA1,APOE,BACE2,C15orf48,CD44,CP,DMBT1,DUOX2,FAM3D,FMO2,FRK,GABRP,GIPC2,ID1,IGFBP7,LEFTY1,LGALS4,LTF,MGST1,MMP7,Muc4,PGLYRP1,PRSS35,PTPRU,RUNX1,S100A6,SERPINB5,SORD,SULT1C2,TFF2,TFF3,TIMP3,TNFRSF11B,WFDC2
tretinoin		chemical - endogenous mammalian		1.948		3.07e-07	ANXA1,ANXA5,APOE,ATP2A3,CD44,CES1,COTL1,CP,CXCL6,DBI,ID1,IGFBP7,KLF5,LEFTY1,LTF,MMP7,MSLN,MUC20,NR2F2,PTPRU,S100B,SERPINB5,SMPD3,SPINK4,TFF2,TNFAIP2,TNFRSF11B,Wfdc18	51 (11)
progesterone		chemical - endogenous mammalian		-0.955		1.18e-06	APOE,CES1,CKMT1A/CKMT1B,CP,CRYAB,ID1,KLF5,LAMB3,LTF,MMP7,PARM1,PIP5K1B,PRSS35,S100A6,TIMP3,WFDC2	45 (11)
dexamethasone		chemical drug		0.605		1.74e-06	Akr1b7,ANXA1,APOE,ATP10B,C4bp,CD44,CES1,CP,CRIP1,CRYAB,CTSE,CXCL6,CYP3A7,ID1,Ifi27l2a/Ifi27l2b,KLF5,LAMB3,LEFTY1,LGALS2,MGST1,MSLN,SERPINB1,SLC10A2,SORD,SPINK4,Sult1d1,TIMP3,TMPRSS4,TNFAIP2,TNFRSF11B,Wfdc18,ZC3H12A	66 (11)
mifepristone		chemical drug		0.512		4.24e-06	ANXA1,APOE,CKMT1A/CKMT1B,LAMB3,LEFTY1,LTF,PGLYRP1,S100A6,Sult1d1,TIMP3,TMPRSS2	45 (7)
TP63		transcription regulator		-0.852	bias	6.58e-06	ECM1,ID1,IGFBP7,LAMB3,Muc4,PTPRU,RUNX1,SERPINB5,SPINK4,TFF2,TIMP3,VIL1,WFDC2	41 (7)
captopril		chemical drug		1.698		6.72e-06	Akr1b7,ANXA1,CD44,CP,CSRP2,TSPAN8
nitrofurantoin		chemical drug		1.134		7.07e-06	ANXA5,APOE,CES1,CP,DBI,ID1,PRDX1,TIMP3
HNF1A		transcription regulator	Activated	3.526	bias	7.84e-06	CCL28,CLDN2,CYP3A7,FRK,Muc4,SLC10A2,SULT1C2,Sult1d1,TMPRSS2,TMPRSS4,UGT2B10,UGT2B7,VIL1
butyric acid		chemical - endogenous mammalian		0.497		1.49e-05	ANXA1,ANXA5,ATP2A3,CD44,GATA5,KLF5,MAPK13,MMP7,PRDX1,TFF3,TIMP3,TNFAIP2	36 (8)
KRAS		enzyme		1.556		1.74e-05	CD44,CRYAB,CXCL6,ID1,LAMB3,MMP7,MSLN,MUC20,Muc4,S100A14,S100A6,SMPD3,TIMP3,TNFAIP2,TNFRSF11B,TSPAN1	53 (12)
IL10RA		transmembrane receptor		0.632		1.83e-05	AOC1,CSRP2,CTSE,DRAM1,ECM1,Gbp8,Gsta4,LRG1,SULT1C2,WFDC2
IL1B		cytokine	Activated	2.261	bias	1.92e-05	ANXA1,APOE,CCL28,CD44,CP,CRYAB,CXCL6,DBI,LAMB3,MMP7,NR2F2,S100A6,S100B,SLC10A2,TIMP3,TNFAIP2,TNFRSF11B,ZC3H12A	52 (10)
PPARA		ligand-dependent nuclear receptor		-0.326		2.2e-05	Akr1b7,APOE,CA9,CTSE,DBI,Gsta4,LAMB3,LGALS4,LY6D,MGST1,SLC10A2,SORD	18 (3)
PPARD	0.253	ligand-dependent nuclear receptor		0.213		2.37e-05	APOE,FCGBP,LGALS4,S100A6,SLC10A2,SORD,TFF2,TFF3,TNFRSF11B	22 (3)
SMARCA4		transcription regulator	Activated	2.144	bias	2.6e-05	CD44,COTL1,CP,FAM167A,FMO2,GSTO1,IGFBP7,MAPK13,MMP7,NR2F2,PLS1,S100A6,SERPINB5,TSPAN8
tetradecanoylphorbol acetate		chemical drug	Activated	2.887	bias	2.79e-05	ANXA1,ATP2A3,CD44,CES1,CXCL6,DMBT1,ECM1,FCGBP,GABRP,ID1,KLF5,LAMB3,MMP7,MUC20,PRDX1,RUNX1,S100A14,SLC9A2,TFF2,TNFRSF11B	55 (13)
rifampin		chemical drug		1.091	bias	3.17e-05	ATP10B,CES1,CRYAB,CYP3A7,SERPINB1,TMPRSS4,TNFRSF11B	10 (2)
OSM		cytokine		1.237	bias	3.36e-05	ANXA1,CXCL6,ECM1,ID1,LRG1,LY6D,PLLP,RUNX1,SERPINB1,SORD,TIMP3,TNFAIP2,TNFRSF11B	37 (9)
TP73		transcription regulator		-1.323		3.58e-05	CRYAB,DRAM1,ECM1,KLF5,LRG1,LY6D,RUNX1,TIMP3,TNFAIP2,TSPAN1,Wfdc18
JUN		transcription regulator		1.239	bias	4.05e-05	ANXA1,APOE,CD44,CLDN2,IGFBP7,LAMB3,MMP7,PRDX1,SERPINB5,SLC10A2,TIMP3,Tmsb4x (includes others)	59 (12)
TNF		cytokine	Activated	3.626	bias	4.14e-05	ANXA1,APOE,CCL28,CD44,COTL1,CP,CRYAB,CXCL6,DBI,DMBT1,Gsta4,ID1,KLF5,LAMB3,LRG1,LY6D,MGST1,MMP7,MSLN,MUC20,NOXO1,SERPINB1,TIMP3,TNFAIP2,TNFRSF11B,ZC3H12A	58 (13)
lomustine		chemical drug		1.342	bias	4.33e-05	ANXA1,CD44,CP,ID1,TSPAN8
FOS	0.898	transcription regulator		0.692		4.4e-05	CD44,CLDN2,EPS8,LAMB3,LGALS4,MGST1,MMP7,MSLN,PIP5K1B,PRDX1,RUNX1,SLC10A2,TNFRSF11B	37 (4)
NR1I3		ligand-dependent nuclear receptor	Activated	2.414	bias	4.91e-05	CYP3A7,Gsta4,LRG1,Sult1d1,TMPRSS2,TNFAIP2
IKBKB		kinase		0.862	bias	6.08e-05	CD44,CP,CXCL6,IGFBP7,KLF5,TIMP3,Tmsb4x (includes others),TNFAIP2,TNFRSF11B	55 (13)
STAT5A		transcription regulator				6.24e-05	APOE,C15orf48,ID1,LAMB3,MMP7,MUC20,TFF3,TSPAN8,Wfdc18
EP300		transcription regulator	Activated	2.219	bias	6.63e-05	CAMK2B,CTSE,ID1,LEFTY1,MMP7,PIP5K1B,RPS6KA1,SERPINB5,SMPD3,TMPRSS2,TMPRSS4	12 (3)
MRTFB		transcription regulator		-0.447	bias	7.06e-05	CXCL6,ID1,LTF,MAPK13,PGLYRP1,RUNX1,ZFHX4
doxorubicin		chemical drug		1.443		7.19e-05	ANXA1,CD44,CP,CXCL6,DRAM1,ID1,IGFBP7,PRDX1,RUNX1,SERPINB5,TSPAN8	60 (17)
ADAM17		peptidase				7.58e-05	DUOX2,DUOXA2,LRG1,MMP7,TNFRSF11B
CBX5		transcription regulator	Inhibited	-2.449	bias	7.65e-05	C15orf48,LAMB3,MMP7,MUC20,TFF3,TSPAN8
ethionine		chemical toxicant		0.762	bias	8.45e-05	ANXA1,CD44,CP,TSPAN8
HNF1B		transcription regulator		-1.342		8.79e-05	CD44,EPS8,ID1,MMP7,S100A6,Sult1d1
Betacatenin/TCF		complex				8.95e-05	CD44,MMP7,TNFRSF11B
EGF		growth factor	Activated	2.755	bias	0.000102	CD44,CLDN2,CXCL6,Gsta4,ID1,LAMB3,LTF,RPS6KA1,RUNX1,SLC9A2,TIMP3,VIL1	47 (13)
diethylstilbestrol		chemical drug		1.227	bias	0.000106	CXCL6,GABRP,LTF,Muc4,PGLYRP1,RUNX1,S100A6,SERPINB5,WFDC2
MRTFA		transcription regulator		-0.447		0.000112	CXCL6,ID1,LTF,MAPK13,PGLYRP1,RUNX1,ZFHX4
phenacetin		chemical drug		1	bias	0.000113	ANXA1,CD44,CP,TSPAN8
IRF2		transcription regulator		1.633	bias	0.00012	CES1,CLDN2,FCGBP,ID1,MMP7,TM4SF20
NKX2-1		transcription regulator				0.00012	FAM3D,Gsta4,LRG1,NAPSA,PGLYRP1,TFF2,TFF3
CFTR		ion channel		-1.432		0.000148	DMBT1,LRG1,PGLYRP1,SPINK4,Tmsb4x (includes others)
3,4,5,3',4'-pentachlorobiphenyl		chemical toxicant		1.387	bias	0.000156	CD44,CES1,CYP3A7,Gsta4,UGT2B7
PRDM1		transcription regulator		-0.563		0.000162	2210407C18Rik,CA9,CD44,CXCL6,ECM1,FAM167A,Gsta4,PLAC8
testosterone propionate		chemical drug		0		0.000162	DMBT1,PARM1,SERPINB5,TFF3
n-nitrosomethylbenzylamine		chemical toxicant				0.000174	CD44,CYP3A7,Gsta4,KLF5,LAMB3,MGST1
TP53	-0.299	transcription regulator		1.613		0.000178	ANXA1,APOE,CA9,CAMK2B,CD44,CKMT1A/CKMT1B,CP,CRYAB,DBI,DRAM1,ECM1,EPS8,ID1,IGFBP7,NOXA1,PPIC,PTPRU,RPS6KA1,RUNX1,S100B,SERPINB5,TIMP3,Tmsb4x (includes others),TNFAIP2,ZC3H12A	52 (13)
FGF19		growth factor				0.000184	Akr1b7,APOE,CTSE,ID1,SLC10A2
vancomycin		biologic drug		1.432	bias	0.000184	ANXA1,CD44,CP,FMO2,TSPAN8
2-bromoethylamine		chemical reagent		1.067	bias	0.000208	ANXA1,CD44,CP,TSPAN8
elcatonin		biologic drug				0.00021	CXCL6,TNFRSF11B
CCN5		growth factor		0		0.000262	CD44,IGFBP7,LAMB3,TFF3
2,3,4,7,8-pentachlorodibenzofuran		chemical toxicant		1		0.000262	CD44,CES1,CYP3A7,UGT2B7
CDX2		transcription regulator				0.000264	AOC1,CLDN2,CTSE,KLF5,NR2F2,TFF2
IL6		cytokine	Activated	3.049	bias	0.000267	ANXA1,APOE,CD44,CES1,CLDN2,CP,CRYAB,CXCL6,Gsta4,ID1,LRG1,LTF,MMP7,TNFRSF11B	55 (13)
GLI1		transcription regulator		1.254	bias	0.000279	CD44,GATA5,IGFBP7,NR2F2,RPS6KA1,TIMP3,VIL1
CHUK		kinase		1.516	bias	0.000295	CP,CXCL6,KLF5,SERPINB5,TIMP3,TNFAIP2,TNFRSF11B	57 (14)
FGF10		growth factor		0.927	bias	0.000325	ANXA1,S100A6,TIMP3,TSPAN8
LY294002		chemical - kinase inhibitor	Inhibited	-2.17	bias	0.00033	APOE,CA9,CD44,CP,CXCL6,FRK,Gsta4,LAMB3,PRDX1,PTPRU,SULT1C2	47 (8)
CHCHD2		other				0.000349	ID1,LEFTY1
STAT3		transcription regulator	Activated	2.019	bias	0.000354	CA9,CD44,CXCL6,DMBT1,ID1,KLF5,LAMB3,LTF,MMP7,RUNX1,SERPINB1,TFF3	46 (11)
hexachlorobenzene		chemical toxicant		1	bias	0.000373	ANXA1,CD44,CP,TSPAN8
WDR77		transcription regulator				0.000383	DMBT1,SERPINB5,TFF3
phenylbutazone		chemical drug		1.131	bias	0.000455	ANXA1,CD44,CP,TSPAN8
NR1I2		ligand-dependent nuclear receptor		0.728		0.000458	CES1,CYP3A7,Gsta4,MGST1,Sult1d1,TNFRSF11B	39 (6)
ERBB2		kinase		0.426	bias	0.000521	CES1,CRIP1,DSG2,ID1,LAMB3,MAPK13,MMP7,MSLN,PLAC8,S100A6,SPINK4,TIMP3,Tmsb4x (includes others),TSPAN1,Wfdc18
CTNNB1		transcription regulator	Activated	2.772	bias	0.000526	ANXA1,CA9,CD44,CLDN2,CRIP1,CXCL6,ECM1,ID1,KLF5,MMP7,PIP5K1B,PRSS35,TIMP3,TNFRSF11B,TSPAN8	43 (11)
troglitazone		chemical drug		-0.816		0.000533	ATP10B,CRYAB,CXCL6,CYP3A7,DBI,NR2F2,SERPINB5,TFF2,TMPRSS4
sunitinib		chemical drug		-1.98	bias	0.000548	CD44,ECM1,LAMB3,RUNX1	28 (5)
IL6ST	-0.482	transmembrane receptor				0.000548	CD44,CLDN2,LTF,Muc4	30 (6)
TO-901317		chemical reagent		-0.371		0.000574	Akr1b7,APOE,C4bp,Gsta4,PGLYRP1,Sult1d1,TIMP3
triamterene		chemical drug		1	bias	0.000654	ANXA1,CD44,CP,TSPAN8
prednisolone		chemical drug		-1.195	bias	0.000681	APOE,DRAM1,FMO2,NOXA1,NOXO1,PRDX1,TNFRSF11B
gefitinib		chemical drug				0.000704	FMO2,ID1,LTF,S100A14,TIMP3,Wfdc18
mir-296		microRNA				0.000727	CA9,CALML4
1,4-bis[2-(3,5-dichloropyridyloxy)]benzene		chemical toxicant		1.387	bias	0.000741	LRG1,Sult1d1,TMPRSS2,TNFAIP2,UGT2B7	7 (2)
fenamic acid		chemical reagent		1.067	bias	0.000774	ANXA1,CD44,CP,TSPAN8
Alpha catenin		group		-0.463	bias	0.000799	ADAM33,CXCL6,IGFBP7,TNFAIP2,TSPAN8
thioacetamide		chemical toxicant		0.492	bias	0.000822	ANXA1,AOC1,CD44,CP,CSRP2,TMC5,TSPAN8
UPF2		other				0.000824	SERPINB5,TNFRSF11B,TSPAN8
4-tert-octylphenol		chemical toxicant				0.000824	GABRP,Muc4,S100A6
GATA2		transcription regulator		0.152		0.000875	CES1,DMBT1,GABRP,IGFBP7,LTF,MGST1,RUNX1,TMPRSS2,UGT2B7
PTHLH		other				0.000908	ECM1,RUNX1,SMPD3,TNFRSF11B
CYP3A4		enzyme				0.000965	CYP3A7,SLC10A2
farnesyl transferase		complex				0.000965	CRYAB,MMP7
cisplatin		chemical drug		1.121	bias	0.000971	ANXA1,ANXA5,CD44,CP,DRAM1,LAMB3,MUC20,NOXA1,NOXO1,RUNX1,TIMP3,Tmsb4x (includes others),TSPAN8	62 (15)
PTEN		phosphatase		0.707		0.00105	ANXA1,BACE2,CAMK2B,CD44,KLF5,NR2F2,RUNX1,SORD,Tmsb4x (includes others),TNFRSF11B,VIL1,Wfdc18
Mek		group		1.956	bias	0.00107	APOE,CLDN2,CRYAB,ID1,LAMB3,MSLN,RUNX1,TSPAN1	23 (4)
AR		ligand-dependent nuclear receptor		1.144	bias	0.00109	Akr1b7,DBI,DSG2,SERPINB5,SORD,TFF3,TIMP3,TMPRSS2,TNFAIP2,TSPAN8	40 (6)
KDM6A		enzyme				0.00118	CYP3A7,Muc4,UGT2B10
TSC2		other		-0.108	bias	0.00118	ANXA1,CP,CRIP1,CRYAB,S100A6
Bcl9-Cbp/p300-Ctnnb1-Lef/Tcf		complex				0.00124	CD44,MMP7
TGFBR2		kinase				0.00129	CD44,CRYAB,CXCL6,DSG2,TMPRSS2,TNFRSF11B	41 (7)
APC		enzyme		-1	bias	0.00135	CD44,ID1,MMP7,TFF3,TNFRSF11B	27 (5)
bucladesine		chemical toxicant		1.085	bias	0.00135	ANXA1,APOE,CD44,CRYAB,ID1,LAMB3,S100B,TC2N	56 (12)
Sos		group				0.00135	CD44,EPS8,LGALS4,MGST1,PIP5K1B,RUNX1
CST5		other		-1.134	bias	0.00139	ANXA5,CD44,IGSF9,MAPK13,PPIC,PRDX1,RUNX1
methylprednisolone		chemical drug		-1.067		0.0014	ANXA1,CD44,ID1,PLLP,SERPINB1,SLC10A2,SMPD3,SORD,TC2N,TIMP3
methapyrilene		chemical drug		0.447		0.00148	ANXA5,APOE,CES1,CP,DBI
S100P		other				0.00154	COTL1,S100A6
PRL		cytokine		-0.031	bias	0.00157	ANXA5,ECM1,ID1,MGST1,PARM1,Tmsb4x (includes others),Wfdc18
FBXO32		enzyme		-1.982		0.00161	CKMT1A/CKMT1B,CSRP2,CXCL6,KLF5
simvastatin		chemical drug		1.969		0.00181	ANXA1,APOE,COTL1,PGLYRP1,S100A6,TNFRSF11B	36 (8)
CNR1		G-protein coupled receptor		1.342	bias	0.00184	APOE,CA9,EPS8,S100A6,S100B
RCE1		peptidase				0.00187	CRIP1,CRYAB,MGST1
P38 MAPK		group		0.324	bias	0.00191	ANXA5,CD44,CXCL6,DUOX2,KLF5,RUNX1,SERPINB5,TIMP3	49 (11)
RELA		transcription regulator		0.808	bias	0.00203	APOE,CD44,CRYAB,CXCL6,ID1,MMP7,S100A6,TNFAIP2,TNFRSF11B	56 (11)
carbon tetrachloride		chemical toxicant		-0.132	bias	0.00204	APOE,CXCL6,Gsta4,S100A6,SORD,TIMP3	45 (10)
FGF8		growth factor		1		0.00225	CRIP1,CRYAB,LAMB3,TNFRSF11B
TCF		group				0.00225	CD44,ECM1,MMP7,TSPAN8	27 (4)
ACVR1		kinase				0.0023	CSRP2,ID1,Ifi27l2a/Ifi27l2b
erlotinib		chemical drug		1	bias	0.00234	CXCL6,IGFBP7,Tmsb4x (includes others),TNFRSF11B
17-alpha-ethinylestradiol		chemical drug		-0.391		0.00239	APOE,CXCL6,Gsta4,SERPINB5,TFF3	30 (3)
bezafibrate		chemical drug		0.152	bias	0.00263	APOE,DBI,LY6D,TFF2	18 (3)
XRCC5		enzyme				0.00264	APOE,TMPRSS2
PC-SPES		chemical drug				0.00273	ANXA1,ID1,MGST1,TMPRSS2
EZH2		transcription regulator		-0.4		0.00275	C15orf48,GATA5,Ifi27l2a/Ifi27l2b,LAMB3,MMP7,RUNX1,TIMP3,TMPRSS2
allopurinol		chemical drug		1	bias	0.00283	ANXA1,CD44,CP,TSPAN8
dihydrotestosterone		chemical - endogenous mammalian		0.842	bias	0.0029	Akr1b7,APOE,DBI,FRK,IGFBP7,MMP7,RUNX1,TIMP3,TMPRSS2,Tmsb4x (includes others)	53 (11)
NFAT5		transcription regulator		1	bias	0.00294	IGFBP7,PRSS35,TNFAIP2,TNFRSF11B
PPARG		ligand-dependent nuclear receptor		-0.912		0.00295	APOE,CES1,CXCL6,IGFBP7,LAMB3,LY6D,MGST1,NR2F2,PPIC	17 (2)
GALNT6		enzyme				0.00306	TFF2,TFF3
deoxycorticosterone acetate/potassium chloride/sodium chloride		chemical reagent				0.00306	Akr1b7,NR2F2
EGFR		kinase		1.287	bias	0.0032	ANXA1,CLDN2,CRYAB,DSG2,ID1,LAMB3,RUNX1,TNFRSF11B,TSPAN1	47 (11)
PRKAG3		other				0.00321	CES1,GOLM1,ID1,SORD,TSPAN8
decitabine		chemical drug		1.089	bias	0.00323	APOE,CA9,CD44,CYP3A7,DMBT1,DSG2,ID1,IGFBP7,IGSF9,MMP7,SERPINB5,TIMP3	52 (13)
TGFB1		growth factor		0.35		0.00324	APOE,CALML4,CD44,COTL1,CSRP2,CYP3A7,DSG2,ECM1,Gsta4,ID1,IGFBP7,LAMB3,MAPK13,MGAT3,MMP7,RUNX1,S100A6,SERPINB1,SERPINB5,TIMP3,TNFRSF11B	65 (14)
TWIST1		transcription regulator		1	bias	0.0033	CD44,FCGBP,LRG1,PTPRU,TIMP3
F2R		G-protein coupled receptor		0	bias	0.00339	CD44,IGFBP7,LAMB3,SERPINB5	53 (10)
methotrexate		chemical drug		0.896		0.00348	CES1,CLDN2,ID1,PRDX1,TIMP3,TNFRSF11B	29 (6)
puromycin aminonucleoside		chemical reagent		1	bias	0.00351	ANXA1,CD44,CP,TSPAN8
L-685,458		chemical - protease inhibitor				0.00352	ID1,NR2F2
inosine		chemical - endogenous mammalian				0.0037	ANXA1,ANXA5,SERPINB1
CDX1		transcription regulator				0.0037	CLDN2,CTSE,TFF2
OGA		enzyme		-0.707		0.0038	APOE,CD44,CXCL6,EPS8,IGFBP7,S100A6,TIMP3,TNFRSF11B	50 (13)
RARB		ligand-dependent nuclear receptor		-0.152		0.00383	CRYAB,ID1,LTF,MMP7,PLS1
14,15-epoxyeicosatrienoic acid		chemical - endogenous mammalian				0.00401	CD44,TNFRSF11B
STIM1		ion channel				0.00401	GSTO1,PRDX1
NKX3-1		transcription regulator				0.00412	RUNX1,TMPRSS2,VIL1
LMNB1		other				0.00412	CRIP1,CRYAB,MGST1
HIF1A	0.272	transcription regulator		1.824	bias	0.00443	APOE,CA9,CD44,ID1,MMP7,PLAC8,TNFAIP2,TNFRSF11B	46 (11)
FZD9		G-protein coupled receptor				0.00453	CXCL6,Ifi27l2a/Ifi27l2b
glutamyl-Se-methylselenocysteine		chemical - endogenous mammalian				0.00453	ID1,TIMP3
GNA15		enzyme				0.00471	CP,CRYAB,MGST1,PRSS35
APP	-0.478	other		1.163	bias	0.00472	ANXA5,APOE,BACE2,CALML4,CD44,CKMT1A/CKMT1B,CP,CXCL6,DBI,Gsta4,MGAT3,S100B,TNFAIP2	66 (16)
2-(4-amino-1-isopropyl-1H-pyrazolo[3,4-d]pyrimidin-3-yl)-1H-indol-5-ol		chemical reagent		0.2		0.00475	CD44,CXCL6,ID1,KLF5,SERPINB1
forskolin		chemical toxicant	Activated	2.949	bias	0.00487	Akr1b7,CD44,CRYAB,DUOX2,ECM1,ID1,LTF,MGAT3,PRDX1,RUNX1,TNFRSF11B	39 (9)
U0126		chemical - kinase inhibitor		-0.378	bias	0.00496	CA9,CD44,CLDN2,Gsta4,KLF5,RPS6KA1,RUNX1,TIMP3,TNFRSF11B	49 (13)
PTK2		kinase				0.00503	MMP7,SERPINB1,TIMP3
miR-9-5p (and other miRNAs w/seed CUUUGGU)		mature microRNA				0.00507	CD44,ONECUT2
CREB3		transcription regulator				0.00507	ANXA1,TMPRSS2
NFKBIA	-0.318	transcription regulator		0.164		0.00508	CP,CRYAB,CXCL6,KLF5,TIMP3,Tmsb4x (includes others),TNFAIP2,TNFRSF11B	57 (13)
5-hydroxytryptamine		chemical - endogenous mammalian				0.00533	DUOX2,MAPK13,RPS6KA1,SLC10A2
pirinixic acid		chemical toxicant		1.709	bias	0.00535	APOE,CYP3A7,DBI,LAMB3,LGALS4,LY6D,PPIC,SLC10A2	18 (3)
PDX1		transcription regulator				0.00556	ATP2A3,CD44,CKMT1A/CKMT1B,ID1,TSPAN8
cyclosporin A		biologic drug		-0.976		0.00564	ANXA1,APOE,CD44,CP,RUNX1,SLC10A2,SPINK4,TSPAN8	50 (12)
vitamin K2		chemical drug				0.00565	SERPINB1,TNFRSF11B
CEBPA	0.25	transcription regulator	Activated	2.157	bias	0.00579	ANXA1,CYP3A7,ID1,KLF5,LEFTY1,LTF,SERPINB1,SERPINB5	28 (4)
CXCR4		G-protein coupled receptor				0.0058	CD44,ID1,IGFBP7	39 (7)
ATF4	-0.254	transcription regulator		0.152	bias	0.00581	APOE,CA9,IGFBP7,MGST1,TNFRSF11B	42 (6)
pivalyloxymethyl butyrate		chemical drug				0.00596	ATP2A3
bovine testicular hyaluronidase		biologic drug				0.00596	CD44
DNAJA4		other				0.00596	APOE
MLLT11		other				0.00596	CD44
DSC2		other				0.00596	CD44
tandutinib		chemical drug				0.00596	ID1
RAB27A		enzyme				0.00596	CD44
MLK		group				0.00596	MMP7
TUBB3		other				0.00596	ANXA5
PDPN	-0.351	other				0.00596	CD44
CDKL2		kinase				0.00596	CD44
ALYREF		transcription regulator				0.00596	APOE
SRRM1		other				0.00596	CD44
SCH772984		chemical - kinase inhibitor				0.00596	MMP7
E. coli 0111:B4 peptidoglycan		chemical - endogenous non-mammalian				0.00596	DBI
anti-miR-29a inhibitor		chemical reagent				0.00596	TIMP3
phenylpropanoic acid		chemical - endogenous mammalian				0.00596	ATP2A3
bathophenanthroline		chemical reagent				0.00596	CP
H/K/NRAS		group				0.00596	KLF5
isobutyric acid		chemical - endogenous non-mammalian				0.00596	ATP2A3
ETV6-PDGFRB		fusion gene/product				0.00596	ID1
isovaleric acid		chemical - endogenous mammalian				0.00596	ATP2A3
hydrocortisone phosphate		chemical drug				0.00596	APOE
SB-431542		chemical reagent		0.063		0.00599	CD44,ID1,IGFBP7,LEFTY1
Smad2/3		group				0.00606	ID1,RUNX1,TIMP3
GDF15		growth factor				0.00625	SERPINB5,TIMP3
RARA		ligand-dependent nuclear receptor		0		0.00626	CD44,CP,LTF,MUC20,ONECUT2,RUNX1,TNFRSF11B	46 (5)
testosterone		chemical - endogenous mammalian		1.09	bias	0.00636	Akr1b7,ANXA1,ID1,MGST1,MMP7,SERPINB5,TNFRSF11B	37 (8)
gentamicin C		chemical drug				0.00662	ANXA1,CD44,CP
FUT8		enzyme				0.00688	GOLM1,MGAT3
XRCC6		enzyme				0.00688	APOE,TMPRSS2
SCX	-0.259	transcription regulator				0.00688	ID1,TIMP3
CYP2J2		enzyme				0.00688	CD44,CXCL6
alendronic acid		chemical drug				0.00688	ID1,TNFRSF11B
BCL2L1		other				0.00691	CD44,ECM1,TNFRSF11B
SB203580		chemical - kinase inhibitor		-1.526	bias	0.00717	ANXA1,CRYAB,DUOX2,Gsta4,PRDX1,RUNX1,TIMP3,TNFRSF11B	51 (12)
PGR		ligand-dependent nuclear receptor		0.895	bias	0.00721	CD44,ID1,KLF5,PIP5K1B,RUNX1,S100A6	39 (11)
MECP2		transcription regulator				0.00729	ANXA1,APOE,CAMK2B,GSTO1
trichostatin A		chemical drug		-0.274		0.00732	APOE,CA9,CD44,CYP3A7,DSG2,ID1,IGSF9,MMP7,SERPINB5,TIMP3,TMPRSS2,TNFAIP2	53 (12)
TMPRSS2-ERG		fusion gene/product	Activated	2		0.00749	C15orf48,ID1,LURAP1L,MSLN
lipopolysaccharide		chemical drug	Activated	3.245	bias	0.0075	ANXA1,ANXA5,APOE,CD44,CP,CRYAB,CXCL6,DMBT1,DRAM1,LTF,MMP7,MUC20,PGLYRP1,PRDX1,PTPRU,SERPINB1,TIMP3,Tmsb4x (includes others),TNFAIP2,TNIP3,ZC3H12A	60 (13)
POLR2A		enzyme				0.00752	LEFTY1,TMPRSS2,Tmsb4x (includes others)
TRIM59		enzyme				0.00754	CXCL6,MMP7
SALL4		transcription regulator				0.00754	CD44,LEFTY1
miR-218-5p (and other miRNAs w/seed UGUGCUU)		mature microRNA				0.00754	LAMB3,ONECUT2
miR-199a-3p (and other miRNAs w/seed CAGUAGU)		mature microRNA				0.00754	CD44,RUNX1
selenomethylselenocysteine		chemical - endogenous mammalian				0.00754	CES1,TIMP3
calcitriol		chemical drug		1.659		0.00763	C15orf48,CES1,CXCL6,CYP3A7,ID1,LTF,SERPINB1,SULT1C2,TNFRSF11B	33 (7)
WNT5A		cytokine		-0.594		0.00769	CRYAB,CXCL6,LAMB3,MMP7	43 (10)
dimethyl sulfoxide		chemical drug	Activated	2	bias	0.00769	ANXA1,NR2F2,SMPD3,TNFRSF11B
FANCC		other				0.00815	CAMK2B,MMP7,UGT2B7
WNT3A		cytokine		0.896	bias	0.00821	CD44,ID1,RUNX1,SERPINB1,TIMP3,TNFRSF11B	32 (8)
cannabidiol		chemical drug				0.00822	ID1,S100B
KDM1A	-0.487	enzyme				0.00825	GATA5,LEFTY1,ONECUT2,SERPINB1,TFF2
JAK1		kinase				0.00848	ID1,LRG1,RUNX1
CD44	1.561	other		1.958	bias	0.00857	CD44,CXCL6,ECM1,LY6D,MMP7	45 (10)
miR-21-5p (and other miRNAs w/seed AGCUUAU)		mature microRNA				0.00882	SERPINB5,TIMP3,TNFRSF11B
ETV1		transcription regulator				0.00894	MMP7,TMPRSS2
SUZ12	-0.423	enzyme				0.00899	LAMB3,MMP7,TNFAIP2,TNFRSF11B
glucocorticoid		chemical drug		-0.071		0.00916	ANXA1,CD44,CRIP1,CYP3A7,GABRP,TNFRSF11B	45 (8)
VHL		transcription regulator				0.00922	CA9,DUOX2,MYL12B,RUNX1
IL22		cytokine		1.964	bias	0.00922	CLDN2,CXCL6,DMBT1,TFF2
SP600125		chemical - kinase inhibitor		0		0.0093	APOE,CD44,DSG2,LGALS2,PRDX1,SLC10A2	39 (5)
NR3C1	-0.368	ligand-dependent nuclear receptor		1.357		0.00943	ANXA1,APOE,CRYAB,CYP3A7,DBI,LEFTY1,SLC10A2,TIMP3,TNFAIP2,TNFRSF11B	71 (15)
IKBKG		kinase		0.849	bias	0.00945	CP,CXCL6,KLF5,TNFAIP2	56 (12)
CREBBP	-0.275	transcription regulator				0.00947	CAMK2B,CD44,PIP5K1B,RPS6KA1,SMPD3,TMPRSS2,TMPRSS4	12 (3)
PAX7		transcription regulator				0.00951	FRK,MSLN,PARM1
HEXIM1		transcription regulator				0.00968	ANXA1,Tmsb4x (includes others)
mibolerone		chemical drug				0.00968	DBI,LRG1,TIMP3,TMPRSS2	11 (2)
Brd4		kinase				0.00987	LEFTY1,Tmsb4x (includes others),WFDC2
RELB	-0.302	transcription regulator				0.0102	ANXA5,SERPINB5,TNFAIP2
Hif1		complex				0.0102	CA9,CP,TFF3
ADAMTS12		peptidase				0.0104	S100A6,TNFAIP2
Pka		complex				0.0107	APOE,CD44,RUNX1,TNFRSF11B
ETS1		transcription regulator				0.0109	ATP2A3,CD44,MMP7,RUNX1,SERPINB5
dinoprost		chemical - endogenous mammalian				0.011	ID1,MGST1,TIMP3
cyclophosphamide		chemical drug				0.011	CD44,CP,TSPAN8
TAL1		transcription regulator				0.0111	DSG2,MSLN,PTPRU,RUNX1,ZC3H12A
BMPR2		kinase				0.0112	ID1,TNFRSF11B
nilvadipine		chemical drug				0.0112	CRYAB,GABRP
PRNP		other				0.0114	APOE,CD44,EPS8
ciprofibrate		chemical drug		0.218		0.0114	C4bp,DBI,LY6D,SLC10A2
AGN194204		chemical drug		1	bias	0.0115	Akr1b7,COTL1,PARM1,PEAR1,PLAC8
gentamicin C1		chemical drug				0.0119	CD44
4-aminopyrazolo(3,4-d)pyrimidine		chemical reagent				0.0119	APOE
MBNL3		other				0.0119	CD44
L3MBTL1		other				0.0119	RUNX1
CTDSPL2		phosphatase				0.0119	ID1
LEFTY2		growth factor				0.0119	MMP7
AFM		transporter				0.0119	APOE
DPP10-AS1		other				0.0119	TIMP3
SYMPK		other				0.0119	CLDN2
AMD1		enzyme				0.0119	Tmsb4x (includes others)
miR-1298-5p (and other miRNAs w/seed UCAUUCG)		mature microRNA				0.0119	LAMB3
lynestrenol		chemical drug				0.0119	APOE
abiraterone		chemical drug				0.0119	TMPRSS2
cobimetinib		chemical drug				0.0119	CD44
PCSK6		peptidase				0.0119	LEFTY1
RBM3	-0.269	other				0.0119	CD44
Hsf4		transcription regulator				0.0119	CRYAB
KMT5A		enzyme				0.0119	RUNX1
APOC1		transporter				0.0119	APOE
IPP-204106N		chemical drug				0.0119	CA9
RK-24466		chemical - kinase inhibitor				0.0119	RUNX1
pamidronic acid		chemical drug				0.0119	TNFRSF11B
des-Arg-9 bradykinin		chemical - endogenous mammalian				0.0119	CXCL6
hexanoic acid		chemical - endogenous mammalian				0.0119	ATP2A3
glycoconjugate		chemical - other				0.0119	MGAT3
22-hydroxycholesterol		chemical - endogenous mammalian				0.0119	APOE
CDH11		other				0.0121	MMP7,SERPINB5
nelfinavir		chemical drug				0.0122	ATP2A3,LURAP1L,TNFRSF11B
HMGA1		transcription regulator		1.067		0.0123	CD44,CRYAB,IGFBP7,PTPRU
PPP3CA	-0.534	phosphatase				0.0126	CRYAB,MGST1,S100B
CHADL		other				0.0129	CRYAB,SMPD3
succinic acid		chemical - endogenous mammalian				0.0129	CD44,ID1
MTPN		transcription regulator				0.013	ANXA1,CP,S100A6
cholesterol		chemical - endogenous mammalian		0.747		0.0137	APOE,C15orf48,CES1,DBI,TIMP3
PRKDC		kinase				0.0138	APOE,TMPRSS2
SIAH2		transcription regulator				0.0138	DBI,TMPRSS2
STAT6		transcription regulator		-0.314		0.0141	ANXA1,APOE,CLDN2,CRIP1,LY6D,PLS1,TFF3
PDGF BB		complex		-1.3	bias	0.0144	CD44,CP,CRYAB,CSRP2,MGST1,PRSS35
Nuclear factor 1		group				0.0147	Akr1b7,ID1
daporinad		chemical drug				0.0147	CD44,ID1
NR2E1		ligand-dependent nuclear receptor				0.0147	RPS6KA1,TMPRSS2
SMAD5		transcription regulator				0.0147	ID1,RUNX1
Ige		complex	Activated	2.449	bias	0.0147	ANXA1,PRDX1,RPS6KA1,RUNX1,SERPINB1,TNFRSF11B
estrogen receptor		group		-0.152		0.0149	ANXA1,CD44,LTF,TFF3,TIMP3
medroxyprogesterone acetate		chemical drug				0.0149	C15orf48,CD44,IGFBP7,KLF5
ERBB4	-0.405	kinase				0.0153	SPINK4,TIMP3,Tmsb4x (includes others)
nitric oxide		chemical - endogenous mammalian				0.0156	CD44,MGST1,SERPINB5,TIMP3
ALDH1A2		enzyme				0.0156	CD44,TIMP3
MYOC		other				0.0157	ANXA1,CD44,S100B
NEDD9	0.319	other				0.0157	CA9,CD44,PLAC8
CD38		enzyme	Activated	2	bias	0.0159	CD44,CRIP1,EPS8,S100A6
IL13		cytokine		1.651	bias	0.0161	CD44,CLDN2,CP,CXCL6,DMBT1,TFF3,TNFRSF11B
TCL1A		transcription regulator				0.0162	CTSE,LTF,TNFAIP2
IL17RA		transmembrane receptor				0.0165	CCL28,CXCL6
RXRG		ligand-dependent nuclear receptor				0.0165	CRYAB,TIMP3
filgrastim		biologic drug		0.239		0.0169	ANXA1,CD44,LAMB3,LGALS2,SERPINB1,SORD,TNFAIP2
IL1A		cytokine		1.563	bias	0.0171	CD44,CXCL6,NR2F2,TNFRSF11B,ZC3H12A
phorbol esters		chemical - other				0.0172	ANXA1,CD44,CXCL6
IL4		cytokine		0.206	bias	0.0172	ANXA1,APOE,CD44,CLDN2,CRIP1,CXCL6,LGALS2,LY6D,PLS1,TFF3,TIMP3,TNFRSF11B
HNF4A		transcription regulator		1.731		0.0173	Akr1b7,ANXA5,AOC1,APOE,CALML4,CLDN2,CP,CRIP1,CYP3A7,FMO2,FRK,GIPC2,GSTO1,LTF,MGST1,NR2F2,PAQR5,RPS6KA1,SULT1C2,TIMP3,TNFRSF11B
CHRNA7		transmembrane receptor				0.0175	ID1,TIMP3
TIMP1		cytokine				0.0175	CD44,TIMP3
KIN001-043		chemical - kinase inhibitor				0.0175	ID1,LEFTY1
FOXA1		transcription regulator		0.108		0.0176	ANXA1,LEFTY1,TFF3,TMPRSS2
methylselenic acid		chemical reagent				0.0177	CD44,ID1,SERPINB5,TMPRSS2,UGT2B7
sphingosine-1-phosphate		chemical - endogenous mammalian				0.0177	CD44,KLF5,TNFRSF11B
lopinavir		chemical drug				0.0178	TNFRSF11B
hyodeoxycholic acid		chemical - endogenous mammalian				0.0178	APOE
H. carbonum toxin		biologic drug				0.0178	ATP2A3
arundic acid		chemical drug				0.0178	S100B
SOCS2-AS1		other				0.0178	TMPRSS2
NOP58		enzyme				0.0178	LTF
ITGBL1		other				0.0178	CD44
TAF3	-0.318	transcription regulator				0.0178	LEFTY1
CNDP2		peptidase				0.0178	CD44
WWP1	-0.432	enzyme				0.0178	KLF5
IGF2BP3		translation regulator				0.0178	CD44
ABCB11		transporter				0.0178	SLC10A2
ATP2B4		transporter				0.0178	ATP2A3
GCM1		transcription regulator				0.0178	S100B
MT3		other				0.0178	SERPINB5
CHTOP		other				0.0178	LTF
MUC5AC		peptidase				0.0178	MMP7
4-ethylsulfanylphenylmethylene hydantoin		chemical reagent				0.0178	CD44
4-hydroxyphenylmethylene hydantoin		chemical reagent				0.0178	CD44
anastrozole		chemical drug				0.0178	TNFRSF11B
chlordecone		chemical toxicant				0.0178	LTF
ethyl-3-trifluoromethylbenzyl-alpha-ketoglutarate		chemical reagent				0.0178	CA9
GKT137831		chemical drug				0.0178	CD44
sodium arsenate		chemical toxicant				0.0178	PRDX1
bacitracin		biologic drug				0.0178	ANXA5
methylnitrosourea		chemical toxicant				0.0185	ID1,TIMP3
androgen		chemical drug				0.0186	CD44,KLF5,RUNX1,VIL1
GPD1		enzyme				0.0187	Akr1b7,Gbp8,SERPINB1
miR-125b-5p (and other miRNAs w/seed CCCUGAG)		mature microRNA				0.0193	CD44,ID1,TSPAN8
SMARCB1		transcription regulator		-0.152	bias	0.0197	CD44,CYP3A7,DSG2,PGLYRP1
SLC25A13		transporter				0.0198	Akr1b7,Gbp8,SERPINB1
CD36		transmembrane receptor				0.0198	CXCL6,IGFBP7,TNFRSF11B
fluticasone propionate		chemical drug		-1		0.0201	CES1,MMP7,PLAC8,TIMP3
miR-146a-5p (and other miRNAs w/seed GAGAACU)		mature microRNA				0.0209	DMBT1,LTF,PGLYRP1
BMP6		growth factor				0.0209	CD44,ID1,SORD
ETV5		transcription regulator				0.0215	S100A14,S100A6,TIMP3
NR2F2	1.023	ligand-dependent nuclear receptor				0.0216	LTF,NR2F2
PAK2	-0.293	kinase				0.0216	ID1,S100A6
NR1H4		ligand-dependent nuclear receptor		0.246		0.0221	Akr1b7,APOE,Gsta4,SLC10A2
MYB		transcription regulator		-1.067	bias	0.0225	C15orf48,CAMK2B,CXCL6,ZC3H12A
TFAP4		transcription regulator				0.0226	CD44,ID1
MEOX2		transcription regulator				0.0226	CXCL6,ID1
LEPR		transmembrane receptor				0.0229	ANXA5,APOE,MMP7,TIMP3
D-2-amino-5-phosphonovaleric acid		chemical reagent				0.0236	CAMK2B
tyrosine kinase		group				0.0236	CD44
ATP8B1		transporter				0.0236	SLC10A2
AKR1C3		enzyme				0.0236	TMPRSS2
NXF1		other				0.0236	CD44
firtecan pegol		chemical drug				0.0236	CA9
miR-328-3p (and other miRNAs w/seed UGGCCCU)		mature microRNA				0.0236	CD44
miR-324-5p (miRNAs w/seed GCAUCCC)		mature microRNA				0.0236	RUNX1
TMSB10/TMSB4X		other				0.0236	MMP7
LPAR3		G-protein coupled receptor				0.0236	KLF5
EEF2K		kinase				0.0236	KLF5
2-[[4-[(e)-styryl]phenoxy]methyl]oxirane		chemical reagent				0.0236	APOE
3,6-bis(1-methyl-4-vinylpyridium)carbazole diiodide		chemical reagent				0.0236	MMP7
3,6-bis(4-methyl-2-vinylpyrazinium)carbazole		chemical reagent				0.0236	MMP7
phenylacetate		chemical - endogenous mammalian				0.0236	SERPINB5
(-)-isoproterenol		chemical drug				0.0236	CD44
pentanoic acid		chemical - endogenous mammalian				0.0236	ATP2A3
gemcabene		chemical drug				0.0236	APOE
procysteine		chemical drug				0.0236	SMPD3
cholesterol ester		chemical - endogenous mammalian				0.0236	CES1
Co2+		chemical - endogenous mammalian				0.0236	CA9
TFAP2A		transcription regulator				0.0238	ANXA1,APOE,PRDX1
HOXA10		transcription regulator		-1		0.0241	APOE,ID1,LTF,S100B
LHX1		transcription regulator				0.0244	CLDN2,NAPSA,Sult1d1
CGA		other				0.0244	ID1,PARM1,TIMP3
GW501516		chemical drug				0.0244	CXCL6,LAMB3,LTF
TCF3		transcription regulator				0.0245	CTSE,LY6D,PLAC8,PTPRU,SERPINB1,ZC3H12A
SPP1	-1.202	cytokine		1.919	bias	0.0245	CD44,CXCL6,MMP7,S100A6
F7		peptidase				0.0249	KLF5,MMP7
AGTR1		G-protein coupled receptor				0.0249	CP,MGST1
thyroid hormone		chemical - endogenous mammalian				0.025	APOE,DBI,ID1,Tmsb4x (includes others)
TCF12	-0.308	transcription regulator				0.025	LY6D,PTPRU,ZC3H12A
cycloheximide		chemical reagent		-1.067		0.026	Akr1b7,CD44,KLF5,MMP7,TNFAIP2,TNFRSF11B
IHH		enzyme				0.026	NR2F2,TNFRSF11B
FASLG		cytokine				0.026	CD44,TNFRSF11B
SAHM1		chemical reagent				0.026	CD44,ID1
phenethyl isothiocyanate		chemical drug				0.0262	CYP3A7,Gsta4,MGST1
KL		enzyme				0.0272	MMP7,TNFRSF11B
H2AX		transcription regulator				0.0272	GATA5,TIMP3
SRSF2		transcription regulator				0.0272	CES1,Tmsb4x (includes others)
beta-carotene		chemical - endogenous mammalian				0.0272	DBI,SLC9A2
uranyl nitrate		chemical toxicant				0.0275	IGFBP7,NAPSA,PRDX1
EHMT1		transcription regulator				0.0275	CP,MGST1,MSLN
pyrrolidine dithiocarbamate		chemical reagent				0.0275	ANXA1,CXCL6,MMP7
NR5A2	-0.537	ligand-dependent nuclear receptor				0.0282	Akr1b7,MMP7,SLC10A2
plicamycin		chemical drug				0.0282	CA9,EPS8,ID1
RAC2	0.274	enzyme				0.0284	ANXA1,S100A6
MAP2K1	-0.287	kinase				0.029	APOE,CD44,CLDN2,CRYAB
nicotine		chemical drug				0.029	CD44,DBI,ID1,MMP7
TLR4		transmembrane receptor		0.94	bias	0.0293	CD44,CXCL6,DUOX2,RUNX1,SERPINB5,ZC3H12A
globotriaosylceramide		chemical - endogenous mammalian				0.0295	CD44
Erm		group				0.0295	CD44
edratide		biologic drug				0.0295	CD44
TRIM29		transcription regulator				0.0295	CD44
TMPRSS6		peptidase				0.0295	ID1
ZMIZ2		transcription regulator				0.0295	CD44
dinaciclib		chemical drug				0.0295	S100B
ZIC1		transcription regulator				0.0295	APOE
TDP2		transcription regulator				0.0295	TMPRSS2
FZD7		G-protein coupled receptor				0.0295	CD44
mir-489		microRNA				0.0295	MMP7
miR-873-5p (and other miRNAs w/seed CAGGAAC)		mature microRNA				0.0295	CD44
WSB1	-0.576	other				0.0295	CA9
CDR2		other				0.0295	CA9
HEPH		transporter				0.0295	CP
BBC3		other				0.0295	PRDX1
VCAM1	0.446	transmembrane receptor				0.0295	CD44
oxytetracycline		chemical drug				0.0295	ID1
cathelicidin-WA		chemical - endogenous mammalian				0.0295	TFF3
IMTPPE		chemical reagent				0.0295	TMPRSS2
retinaldehyde		chemical - endogenous mammalian				0.0295	CD44
methyltestosterone		chemical drug				0.0295	SORD
2-methoxyestradiol		chemical - endogenous mammalian				0.0296	ID1,LTF
estrogen		chemical drug				0.0297	AOC1,APOE,LTF,Tmsb4x (includes others),TNFRSF11B
bleomycin		chemical drug		1	bias	0.03	CAMK2B,CTSE,ID1,TIMP3
black raspberry extract		chemical drug				0.0302	CD44,KLF5,LAMB3
RET		kinase				0.0302	ANXA1,MMP7,TIMP3
STK40		kinase				0.0308	APOE,IYD
IFNLR1		transmembrane receptor				0.0308	CXCL6,TNFAIP2
Rxr		group				0.0309	Akr1b7,APOE,LTF
IFNB1		cytokine				0.0316	ANXA5,CRYAB,CXCL6,Gbp8,Ifi27l2a/Ifi27l2b
EDN1	-0.569	cytokine				0.032	ANXA1,ANXA5,MMP7,TIMP3
ABCA1		transporter				0.032	ANXA1,APOE
GSK2816126		chemical drug				0.032	DUOX2,KLF5
C11orf95-RELA		fusion gene/product				0.032	CD44,S100A6
CXCL12	-0.967	cytokine				0.0325	CD44,ID1,IGFBP7,TNFRSF11B
KMT2D		transcription regulator		1.98	bias	0.0325	CRIP1,LAMB3,PPIC,SORD
Tgf beta		group		0.497	bias	0.0328	ID1,MMP7,RUNX1,TIMP3,TNFRSF11B
GH1		growth factor				0.033	DBI,MGST1,PRDX1
herbimycin		chemical - kinase inhibitor				0.0333	ATP2A3,TNFRSF11B
PKD1		ion channel				0.0335	KCTD14,NAPSA,TNFRSF11B,ZFHX4
TCF4	-0.38	transcription regulator	Activated	2		0.0336	CTSE,LEFTY1,LY6D,PLAC8,RPS6KA1,SERPINB1
deferoxamine		chemical drug		1	bias	0.034	CA9,CP,ECM1,PIP5K1B
PTP4A1	-0.958	phosphatase				0.0344	ANXA5,IGFBP7,PRDX1
RXRA		ligand-dependent nuclear receptor		0.254		0.0345	APOE,CRYAB,ECM1,LTF,SLC10A2
baicalin		chemical - endogenous non-mammalian				0.0346	MGST1,TNFRSF11B
ITGA5		transmembrane receptor				0.0346	APOE,CD44
HOXA3		transcription regulator				0.0346	NR2F2,RUNX1
IL11RA		transmembrane receptor				0.0346	KLF5,MMP7
bicalutamide		chemical drug				0.0346	SORD,TMPRSS2
genistein		chemical drug		1.091		0.0347	CD44,CXCL6,ID1,LTF,NAPSA,TNFRSF11B
CHD8		enzyme				0.0353	TMPRSS2
N-hexanoylhomoserine lactone		chemical - endogenous non-mammalian				0.0353	CXCL6
MN1		other				0.0353	TNFRSF11B
H1-10		other				0.0353	UGT2B10
TRPM7		kinase				0.0353	ANXA1
OLIG2		transcription regulator				0.0353	S100B
Pzp		other				0.0353	APOE
BCL2L12		other				0.0353	CRYAB
HAS1		enzyme				0.0353	CD44
mir-302		microRNA				0.0353	NR2F2
MSLN	0.899	other				0.0353	MMP7
BDKRB1		G-protein coupled receptor				0.0353	CXCL6
TRPC3		ion channel				0.0353	S100B
TRIM33		transcription regulator				0.0353	RUNX1
TFF2	2.27	other				0.0353	SLC9A2
RAP1A	-0.253	enzyme				0.0353	MMP7
SMARCD1		transcription regulator				0.0353	TMPRSS2
SERPIND1		other				0.0353	KLF5
Paxip1		other				0.0353	ANXA1
CXXC4		other				0.0353	MMP7
N-retinylidene-N-retinylethanolamine		chemical - endogenous mammalian				0.0353	DRAM1
phenylamil		chemical reagent				0.0353	ID1
triadimefon		chemical toxicant				0.0359	CES1,CYP3A7
TRPS1		transcription regulator				0.0359	RUNX1,SMPD3
Hedgehog		group				0.0359	GATA5,VIL1
IL12 (complex)		complex				0.0361	CD44,CXCL6,PLAC8,SERPINB5
ERK1/2		group		1.387	bias	0.037	AOC1,CD44,CXCL6,ID1,S100A6
ADRA1A		G-protein coupled receptor				0.0372	CSRP2,MMP7
methimazole		chemical drug				0.0372	DMBT1,PRDX1
BMP2		growth factor		0.949	bias	0.0372	AOC1,ID1,TIMP3,TNFRSF11B
CLDN7		other				0.0374	APOE,IGFBP7,SERPINB1
MAP2K5		kinase				0.0385	ID1,KLF5
FGF1		growth factor				0.0397	APOE,SERPINB1,TIMP3
EIF2S1	-0.388	translation regulator				0.0399	ATP2A3,CA9
chromium		chemical drug				0.0399	Gsta4,TNFAIP2
BMP4		growth factor		1.017	bias	0.04	GABRP,ID1,LEFTY1,TNFRSF11B
ANGPT2		growth factor				0.04	CRYAB,KLF5,MGST1,MMP7
NFkB (complex)		complex	Activated	2.406	bias	0.0402	APOE,CD44,CXCL6,DMBT1,RUNX1,TNFAIP2,TNFRSF11B,ZC3H12A
Jnk		group				0.0406	ANXA5,CD44,CLDN2,CXCL6
taurodeoxycholic acid		chemical - endogenous mammalian				0.041	SLC10A2
24(S),25-epoxycholesterol		chemical - endogenous mammalian				0.041	APOE
triamcinolone		chemical drug				0.041	APOE
nicotinic acetylcholine receptor		complex				0.041	ID1
rh-endostatin		chemical drug				0.041	TMPRSS2
MED28	-0.67	other				0.041	CRIP1
saracatinib		chemical drug				0.041	ID1
DUSP10		phosphatase				0.041	KLF5
miR-139-5p (miRNAs w/seed CUACAGU)		mature microRNA				0.041	RUNX1
KHDRBS1		transcription regulator				0.041	CD44
PIP5K1C		kinase				0.041	PIP5K1B
PLA2G2A		enzyme				0.041	CD44
ITGB8	-0.615	other				0.041	APOE
HESX1		transcription regulator				0.041	RUNX1
H4-16		other				0.041	RUNX1
Elf5		transcription regulator				0.041	Wfdc18
AR-A014418		chemical reagent				0.041	CD44
phytoestrogen		chemical drug				0.041	LTF
BW 245C		chemical reagent				0.041	TNFRSF11B
CHS-828		chemical drug				0.041	CD44
DDT		chemical toxicant				0.041	LTF
ASARM-PO4		chemical reagent				0.041	TNFRSF11B
non-esterified fatty acid		chemical - endogenous mammalian				0.041	APOE
20alpha-hydroxycholesterol		chemical - endogenous mammalian				0.041	APOE
DMD		other				0.0412	CAMK2B,SERPINB1,SLC9A2,Tmsb4x (includes others)
MAP3K1	-0.82	kinase				0.0413	PRDX1,Wfdc18
JAG1	-0.354	growth factor				0.0413	NR2F2,TIMP3
DETA-NONOate		chemical reagent				0.0413	CA9,TNFRSF11B
CDK9		kinase				0.0427	RUNX1,Tmsb4x (includes others)
CLEC11A		growth factor				0.0427	ANXA1,S100A6
carboplatin		chemical drug				0.0427	CD44,CP
MET	0.25	kinase				0.0437	CAMK2B,CD44,RUNX1
WNT1		cytokine				0.0446	KLF5,TFF2,Wfdc18
FGFR2	-0.4	kinase				0.0446	DRAM1,LGALS2,TSPAN8
STING1		other				0.0455	C15orf48,Ifi27l2a/Ifi27l2b
SERPINF1		other				0.0455	CRYAB,TNFRSF11B
SNCA		enzyme				0.0459	EPS8,PLAC8,S100A6,SERPINB1,TC2N
cosyntropin		biologic drug				0.0467	Akr1b7
L-type Calcium Channel		complex				0.0467	APOE
ZNF384		transcription regulator				0.0467	MMP7
HJV		other				0.0467	ID1
ZNF382		transcription regulator				0.0467	ID1
LTBP4		growth factor				0.0467	ID1
PKD2		ion channel				0.0467	LEFTY1
TTN		kinase				0.0467	CRYAB
FALEC		other				0.0467	ECM1
HEYL		transcription regulator				0.0467	TMPRSS2
OCLN		other				0.0467	MMP7
SDC2	-0.356	other				0.0467	MMP7
NEU3		enzyme				0.0467	MMP7
CCX771		chemical reagent				0.0467	CD44
PCBP1		translation regulator				0.0467	CD44
methoxychlor		chemical toxicant				0.0467	LTF
mechlorethamine		chemical drug				0.0467	DUOX2
buserelin		biologic drug				0.0467	ANXA5
MAP2K4		kinase				0.047	CD44,PRDX1
THPO		cytokine				0.047	CD44,RUNX1
CCL11		cytokine				0.047	CCL28,CXCL6
TCF7L2		transcription regulator		1.455	bias	0.0479	ANXA1,CLDN2,CYP3A7,ID1,MMP7
Calmodulin		group				0.0484	CD44,KLF5
ZAP70		kinase				0.0484	ANXA1,SPINK4
KLF5	1.327	transcription regulator				0.0484	KLF5,RUNX1
NR3C2		ligand-dependent nuclear receptor				0.0488	APOE,CXCL6,Gsta4
metribolone		chemical reagent		0.254	bias	0.0498	Akr1b7,CRYAB,MMP7,MYL12B,SORD,TMPRSS2
cadmium chloride		chemical toxicant				0.0499	ANXA5,Gsta4
fulvestrant		chemical drug		-1.969		0.0834	ID1,LTF,TFF3,TNFRSF11B
D-glucose		chemical - endogenous mammalian		1.854		0.103	ANXA1,ATP2A3,DBI,ID1,Ifi27l2a/Ifi27l2b,SERPINB5,VIL1
HRAS		enzyme		1.951		0.113	CD44,CSRP2,FAM167A,KLF5,PPIC,TIMP3,Tmsb4x (includes others)
