# Supplementary material for: Single-cell transcriptome analysis defines heterogeneity of the murine pancreatic ductal tree
Source: eLife. 2021 May 19;10:e67776. doi: 10.7554/eLife.67776 (PMC8184217; doi:10.7554/eLife.67776)
Supplement: Figure 5—source data 1. [file elife-67776-fig5-data1.xls]

## Sheet: M14_C1vC0
© 2000-2020 QIAGEN. All rights reserved.
Ingenuity Canonical Pathways	-log(p-value)	zScore	Ratio	Molecules
Molecular Mechanisms of Cancer	0		0.00256	RRAS2
Protein Kinase A Signaling	0		0.00251	NFATC4
Protein Ubiquitination Pathway	0.273		0.00366	CRYAB
G-Protein Coupled Receptor Signaling	0.274		0.00368	RRAS2
Colorectal Cancer Metastasis Signaling	0.296		0.00395	RRAS2
Opioid Signaling Pathway	0.303		0.00405	RRAS2
Signaling by Rho Family GTPases	0.307		0.0041	BAIAP2
Insulin Secretion Signaling Pathway	0.308		0.00412	SRP54
Breast Cancer Regulation by Stathmin1	0.31		0.00338	IGF1,RRAS2
Huntington's Disease Signaling	0.315		0.00422	IGF1
EIF2 Signaling	0.333		0.00446	RRAS2
Sperm Motility	0.334		0.00448	ERBB2
Integrin Signaling	0.349		0.00469	RRAS2
mTOR Signaling	0.353		0.00476	RRAS2
Thrombin Signaling	0.357		0.00481	RRAS2
CREB Signaling in Neurons	0.358		0.00483	RRAS2
Calcium Signaling	0.36		0.00485	NFATC4
IL-8 Signaling	0.369		0.005	RRAS2
Gap Junction Signaling	0.373		0.00505	RRAS2
Adrenomedullin signaling pathway	0.374		0.00508	RRAS2
Agranulocyte Adhesion and Diapedesis	0.381		0.00518	CXCL12
ERK/MAPK Signaling	0.381		0.00518	RRAS2
PPARα/RXRα Activation	0.386		0.00526	RRAS2
Endothelin-1 Signaling	0.39		0.00532	RRAS2
Hepatic Cholestasis	0.395		0.00541	CD14
Sertoli Cell-Sertoli Cell Junction Signaling	0.395		0.00541	RRAS2
Granulocyte Adhesion and Diapedesis	0.404		0.00556	CXCL12
NF-κB Signaling	0.406		0.00559	RRAS2
PI3K/AKT Signaling	0.414		0.00571	RRAS2
GNRH Signaling	0.418		0.00578	RRAS2
Germ Cell-Sertoli Cell Junction Signaling	0.421		0.00585	RRAS2
Tight Junction Signaling	0.428		0.00595	MPDZ
Cdc42 Signaling	0.43		0.00599	BAIAP2
HMGB1 Signaling	0.434		0.00606	RRAS2
HOTAIR Regulatory Pathway	0.444		0.00625	ERBB2
Aldosterone Signaling in Epithelial Cells	0.449		0.00633	CRYAB
Gαq Signaling	0.449		0.00633	NFATC4
Regulation of eIF4 and p70S6K Signaling	0.451		0.00637	RRAS2
Phagosome Maturation	0.464		0.00662	PRDX5
Hereditary Breast Cancer Signaling	0.491		0.00714	RRAS2
Insulin Receptor Signaling	0.491		0.00714	RRAS2
Ovarian Cancer Signaling	0.494		0.00719	RRAS2
Iron homeostasis signaling pathway	0.499		0.0073	CP
Th2 Pathway	0.502		0.00735	ICOS
Human Embryonic Stem Cell Pluripotency	0.504		0.00741	PDGFD
Gα12/13 Signaling	0.518		0.00769	RRAS2
Semaphorin Neuronal Repulsive Signaling Pathway	0.518		0.00769	ERBB2
Synaptic Long Term Potentiation	0.521		0.00775	RRAS2
White Adipose Tissue Browning Pathway	0.521		0.00775	CTBP2
p70S6K Signaling	0.521		0.00775	RRAS2
14-3-3-mediated Signaling	0.526		0.00787	RRAS2
P2Y Purigenic Receptor Signaling Pathway	0.526		0.00787	RRAS2
PTEN Signaling	0.529		0.00794	RRAS2
Gαi Signaling	0.532		0.008	RRAS2
CCR3 Signaling in Eosinophils	0.535		0.00806	RRAS2
G Beta Gamma Signaling	0.541		0.0082	RRAS2
IL-15 Production	0.544		0.00826	ERBB2
LXR/RXR Activation	0.544		0.00826	CD14
CD28 Signaling in T Helper Cells	0.547		0.00833	NFATC4
Cholecystokinin/Gastrin-mediated Signaling	0.55		0.0084	RRAS2
Role of NANOG in Mammalian Embryonic Stem Cell Pluripotency	0.55		0.0084	RRAS2
Renin-Angiotensin Signaling	0.553		0.00847	RRAS2
Fc Epsilon RI Signaling	0.556		0.00855	RRAS2
Role of PKR in Interferon Induction and Antiviral Response	0.556		0.00855	PDGFD
Role of Tissue Factor in Cancer	0.556		0.00855	RRAS2
Apelin Endothelial Signaling Pathway	0.563		0.0087	RRAS2
Endocannabinoid Developing Neuron Pathway	0.563		0.0087	RRAS2
NGF Signaling	0.566		0.00877	RRAS2
Hepatic Fibrosis Signaling Pathway	0.566		0.00543	PDGFD,RRAS2
HGF Signaling	0.576		0.00901	RRAS2
Pancreatic Adenocarcinoma Signaling	0.582		0.00917	ERBB2
CDK5 Signaling	0.586		0.00926	RRAS2
Paxillin Signaling	0.586		0.00926	RRAS2
Telomerase Signaling	0.589		0.00935	RRAS2
Virus Entry via Endocytic Pathways	0.589		0.00935	RRAS2
Mouse Embryonic Stem Cell Pluripotency	0.604		0.00971	RRAS2
Sumoylation Pathway	0.604		0.00971	CTBP2
SAPK/JNK Signaling	0.607		0.0098	RRAS2
Apoptosis Signaling	0.619		0.0101	RRAS2
VEGF Signaling	0.619		0.0101	RRAS2
UVA-Induced MAPK Signaling	0.622		0.0102	RRAS2
Systemic Lupus Erythematosus In T Cell Signaling Pathway	0.626		0.00599	ICOS,RRAS2
Amyotrophic Lateral Sclerosis Signaling	0.626		0.0103	IGF1
TGF-β Signaling	0.63		0.0104	RRAS2
α-Adrenergic Signaling	0.63		0.0104	RRAS2
FAK Signaling	0.634		0.0105	RRAS2
Melanocyte Development and Pigmentation Signaling	0.638		0.0106	RRAS2
Regulation of Actin-based Motility by Rho	0.638		0.0106	BAIAP2
Prostate Cancer Signaling	0.651		0.011	RRAS2
Th17 Activation Pathway	0.651		0.011	NFATC4
Acute Myeloid Leukemia Signaling	0.659		0.0112	RRAS2
Ceramide Signaling	0.664		0.0114	RRAS2
Synaptogenesis Signaling Pathway	0.669		0.00641	RRAS2,SYT7
BMP signaling pathway	0.677		0.0118	RRAS2
VEGF Family Ligand-Receptor Interactions	0.681		0.0119	RRAS2
Apelin Adipocyte Signaling Pathway	0.691		0.0122	GSTM1
NF-κB Activation by Viruses	0.691		0.0122	RRAS2
PEDF Signaling	0.691		0.0122	RRAS2
Prolactin Signaling	0.696		0.0123	RRAS2
Neuroinflammation Signaling Pathway	0.697		0.00669	CXCL12,NFATC4
FLT3 Signaling in Hematopoietic Progenitor Cells	0.7		0.0125	RRAS2
IL-17 Signaling	0.7		0.0125	RRAS2
JAK/Stat Signaling	0.7		0.0125	RRAS2
Renal Cell Carcinoma Signaling	0.7		0.0125	RRAS2
Role of MAPK Signaling in the Pathogenesis of Influenza	0.7		0.0125	RRAS2
BEX2 Signaling Pathway	0.705		0.0127	ERBB2
IL-3 Signaling	0.705		0.0127	RRAS2
VDR/RXR Activation	0.71		0.0128	CD14
Sirtuin Signaling Pathway	0.715		0.00687	NDRG1,SOD3
Antiproliferative Role of Somatostatin Receptor 2	0.715		0.013	RRAS2
Erythropoietin Signaling	0.72		0.0132	RRAS2
GDNF Family Ligand-Receptor Interactions	0.72		0.0132	RRAS2
Neurotrophin/TRK Signaling	0.72		0.0132	RRAS2
Toll-like Receptor Signaling	0.72		0.0132	CD14
Angiopoietin Signaling	0.725		0.0133	RRAS2
IL-15 Signaling	0.725		0.0133	RRAS2
T Helper Cell Differentiation	0.736		0.0137	ICOS
ERK5 Signaling	0.742		0.0139	RRAS2
Ephrin B Signaling	0.742		0.0139	CXCL12
Growth Hormone Signaling	0.747		0.0141	IGF1
Senescence Pathway	0.752		0.00727	NFATC4,RRAS2
GM-CSF Signaling	0.753		0.0143	RRAS2
IL-10 Signaling	0.758		0.0145	CD14
SPINK1 General Cancer Pathway	0.758		0.0145	RRAS2
ErbB4 Signaling	0.77		0.0149	RRAS2
Serotonin Degradation	0.77		0.0149	ALDH1A1
Netrin Signaling	0.782		0.0154	NFATC4
Nicotine Degradation II	0.782		0.0154	FMO3
Regulation of Cellular Mechanics by Calpain Protease	0.782		0.0154	RRAS2
Thrombopoietin Signaling	0.794		0.0159	RRAS2
Wnt/Ca+ pathway	0.801		0.0161	NFATC4
IL-2 Signaling	0.807		0.0164	RRAS2
Cardiac Hypertrophy Signaling (Enhanced)	0.817		0.00616	IGF1,NFATC4,RRAS2
Cancer Drug Resistance By Drug Efflux	0.827		0.0172	RRAS2
CNTF Signaling	0.834		0.0175	RRAS2
Systemic Lupus Erythematosus Signaling	0.877		0.00873	NFATC4,RRAS2
UVC-Induced MAPK Signaling	0.879		0.0196	RRAS2
Melanoma Signaling	0.887		0.02	RRAS2
Role of Osteoblasts, Osteoclasts and Chondrocytes in Rheumatoid Arthritis	0.906		0.00909	IGF1,NFATC4
iNOS Signaling	0.93		0.0222	CD14
Osteoarthritis Pathway	0.935		0.00948	ANXA5,TIMP3
HIF1α Signaling	0.956		0.00976	IGF1,RRAS2
MIF Regulation of Innate Immunity	0.958		0.0238	CD14
Role of IL-17F in Allergic Inflammatory Airway Diseases	0.958		0.0238	IGF1
B Cell Activating Factor Signaling	0.968		0.0244	NFATC4
Leukocyte Extravasation Signaling	0.985		0.0102	CXCL12,TIMP3
Natural Killer Cell Signaling	0.985		0.0102	NFATC4,RRAS2
April Mediated Signaling	0.989		0.0256	NFATC4
Inhibition of Matrix Metalloproteases	0.989		0.0256	TIMP3
RAR Activation	0.996		0.0103	ALDH1A1,PNRC1
Clathrin-mediated Endocytosis Signaling	1		0.0104	IGF1,PDGFD
Regulation of the Epithelial-Mesenchymal Transition Pathway	1		0.0104	PDGFD,RRAS2
Xenobiotic Metabolism PXR Signaling Pathway	1		0.0104	ALDH1A1,GSTM1
Synaptic Long Term Depression	1.01		0.0106	IGF1,RRAS2
Noradrenaline and Adrenaline Degradation	1.03		0.0286	ALDH1A1
MIF-mediated Glucocorticoid Regulation	1.05		0.0294	CD14
Retinoate Biosynthesis I	1.05		0.0294	ALDH1A1
Acute Phase Response Signaling	1.05		0.0112	CP,RRAS2
Ethanol Degradation II	1.07		0.0312	ALDH1A1
Glutathione-mediated Detoxification	1.07		0.0312	GSTM1
T Cell Exhaustion Signaling Pathway	1.07		0.0114	NFATC4,RRAS2
Mitochondrial Dysfunction	1.09		0.0117	FIS1,PRDX5
Th1 and Th2 Activation Pathway	1.09		0.0117	ICOS,NFATC4
Dopamine Degradation	1.1		0.0333	ALDH1A1
CXCR4 Signaling	1.11		0.012	CXCL12,RRAS2
PKCθ Signaling in T Lymphocytes	1.16		0.0129	NFATC4,RRAS2
Tryptophan Degradation X (Mammalian, via Tryptamine)	1.17		0.04	ALDH1A1
Epithelial Adherens Junction Signaling	1.18		0.0132	BAIAP2,RRAS2
Glucocorticoid Receptor Signaling	1.18		0.00893	NFATC4,RRAS2,TSC22D3
Glutathione Redox Reactions I	1.19		0.0417	GSTM1
Estrogen Receptor Signaling	1.2		0.00915	CTBP2,IGF1,RRAS2
Ethanol Degradation IV	1.21		0.0435	ALDH1A1
Aryl Hydrocarbon Receptor Signaling	1.22		0.014	ALDH1A1,GSTM1
Xenobiotic Metabolism General Signaling Pathway	1.22		0.014	GSTM1,RRAS2
Putrescine Degradation III	1.25		0.0476	ALDH1A1
STAT3 Pathway	1.27		0.0148	IGF1,RRAS2
Fatty Acid α-oxidation	1.27		0.05	ALDH1A1
Oxidative Ethanol Degradation III	1.29		0.0526	ALDH1A1
Atherosclerosis Signaling	1.31		0.0157	CXCL12,PDGFD
IL-6 Signaling	1.33		0.016	CD14,RRAS2
Histamine Degradation	1.34		0.0588	ALDH1A1
RhoA Signaling	1.34		0.0163	BAIAP2,IGF1
Th1 Pathway	1.35		0.0165	ICOS,NFATC4
Sphingosine-1-phosphate Signaling	1.38		0.0171	ACER3,PDGFD
fMLP Signaling in Neutrophils	1.39		0.0172	NFATC4,RRAS2
Systemic Lupus Erythematosus In B Cell Signaling Pathway	1.39		0.0109	BLNK,NFATC4,RRAS2
Rac Signaling	1.41		0.0179	BAIAP2,RRAS2
iCOS-iCOSL Signaling in T Helper Cells	1.42		0.018	ICOS,NFATC4
Phospholipase C Signaling	1.46		0.0117	BLNK,NFATC4,RRAS2
T Cell Receptor Signaling	1.46		0.019	NFATC4,RRAS2
PPAR Signaling	1.47		0.0192	PDGFD,RRAS2
Chronic Myeloid Leukemia Signaling	1.48		0.0194	CTBP2,RRAS2
Bladder Cancer Signaling	1.53		0.0206	ERBB2,RRAS2
PAK Signaling	1.53		0.0206	PDGFD,RRAS2
Neuregulin Signaling	1.54		0.0208	ERBB2,RRAS2
Cardiac Hypertrophy Signaling	1.54		0.0125	IGF1,NFATC4,RRAS2
ErbB Signaling	1.55		0.0213	ERBB2,RRAS2
Calcium Transport I	1.56		0.1	ANXA5
Regulation of IL-2 Expression in Activated and Anergic T Lymphocytes	1.6		0.0225	NFATC4,RRAS2
PDGF Signaling	1.62		0.0233	PDGFD,RRAS2
IL-4 Signaling	1.63		0.0235	NFATC4,RRAS2
Xenobiotic Metabolism AHR Signaling Pathway	1.63		0.0235	ALDH1A1,GSTM1
HER-2 Signaling in Breast Cancer	1.64		0.0238	ERBB2,RRAS2
Sphingosine and Sphingosine-1-phosphate Metabolism	1.66		0.125	ACER3
Superoxide Radicals Degradation	1.66		0.125	SOD3
LPS-stimulated MAPK Signaling	1.66		0.0244	CD14,RRAS2
Role of NFAT in Cardiac Hypertrophy	1.67		0.014	IGF1,NFATC4,RRAS2
Chemokine Signaling	1.68		0.025	CXCL12,RRAS2
Thyroid Cancer Signaling	1.69		0.0253	IGF1,RRAS2
Agrin Interactions at Neuromuscular Junction	1.7		0.0256	ERBB2,RRAS2
FcγRIIB Signaling in B Lymphocytes	1.73		0.0267	BLNK,RRAS2
Estrogen-Dependent Breast Cancer Signaling	1.75		0.027	IGF1,RRAS2
Glioma Invasiveness Signaling	1.75		0.027	RRAS2,TIMP3
Non-Small Cell Lung Cancer Signaling	1.76		0.0274	ERBB2,RRAS2
Actin Nucleation by ARP-WASP Complex	1.77		0.0278	BAIAP2,RRAS2
Ceramide Degradation	1.78		0.167	ACER3
UDP-N-acetyl-D-glucosamine Biosynthesis II	1.78		0.167	FMO3
Role of JAK1 and JAK3 in γc Cytokine Signaling	1.8		0.029	BLNK,RRAS2
NRF2-mediated Oxidative Stress Response	1.81		0.0159	GSTM1,RRAS2,SOD3
Regulation Of The Epithelial Mesenchymal Transition By Growth Factors Pathway	1.81		0.016	ERBB2,PDGFD,RRAS2
Hepatic Fibrosis / Hepatic Stellate Cell Activation	1.83		0.0161	CD14,IGF1,PDGFD
B Cell Receptor Signaling	1.83		0.0162	BLNK,NFATC4,RRAS2
ErbB2-ErbB3 Signaling	1.85		0.0308	ERBB2,RRAS2
PXR/RXR Activation	1.85		0.0308	ALDH1A1,GSTM1
Role of NFAT in Regulation of the Immune Response	1.86		0.0166	BLNK,NFATC4,RRAS2
Ephrin Receptor Signaling	1.86		0.0167	CXCL12,PDGFD,RRAS2
Endometrial Cancer Signaling	1.92		0.0333	ERBB2,RRAS2
Role of Macrophages, Fibroblasts and Endothelial Cells in Rheumatoid Arthritis	1.96		0.0128	CXCL12,NFATC4,PDGFD,RRAS2
Glioblastoma Multiforme Signaling	1.96		0.0182	IGF1,PDGFD,RRAS2
Primary Immunodeficiency Signaling	2.07		0.04	BLNK,ICOS
PI3K Signaling in B Lymphocytes	2.18		0.0217	BLNK,NFATC4,RRAS2
Oncostatin M Signaling	2.2		0.0465	RRAS2,TIMP3
Adipogenesis pathway	2.21		0.0224	CTBP2,NFATC4,TXNIP
Glioma Signaling	2.45		0.0273	IGF1,PDGFD,RRAS2
Actin Cytoskeleton Signaling	2.5		0.0183	BAIAP2,CD14,PDGFD,RRAS2
IGF-1 Signaling	2.52		0.0288	IGF1,IGFBP7,RRAS2
Xenobiotic Metabolism CAR Signaling Pathway	2.73	2	0.0212	ALDH1A1,FMO3,GSTM1,SOD3
Macropinocytosis Signaling	2.91		0.0395	CD14,PDGFD,RRAS2
Xenobiotic Metabolism Signaling	2.92		0.0174	ALDH1A1,FMO3,GSTM1,RRAS2,SOD3
LPS/IL-1 Mediated Inhibition of RXR Function	3.41		0.0223	ALDH1A1,CD14,FMO3,GSTM1,SOD3
Axonal Guidance Signaling	5.15		0.0186	ADAM33,BAIAP2,CXCL12,ERBB2,IGF1,NFATC4,PDGFD,RRAS2,SEMA3C

## Sheet: M18_C4vC2
© 2000-2020 QIAGEN. All rights reserved.
Ingenuity Canonical Pathways	-log(p-value)	zScore	Ratio	Molecules
Estrogen Receptor Signaling	0.287		0.00305	MYC
Neuroinflammation Signaling Pathway	0.315		0.00334	NFE2L2
Xenobiotic Metabolism Signaling	0.327		0.00348	NFE2L2
Systemic Lupus Erythematosus In B Cell Signaling Pathway	0.341		0.00364	MYC
Opioid Signaling Pathway	0.376		0.00405	MYC
cAMP-mediated signaling	0.402		0.00439	AKAP13
Role of Osteoblasts, Osteoclasts and Chondrocytes in Rheumatoid Arthritis	0.414		0.00455	WNT4
Breast Cancer Regulation by Stathmin1	0.426		0.00338	GPRC5C,STMN1
Osteoarthritis Pathway	0.428		0.00474	GLIS2
Calcium Signaling	0.437		0.00485	Tpm1
HIF1α Signaling	0.438		0.00488	HSPA1A/HSPA1B
Natural Killer Cell Signaling	0.452		0.00508	HSPA1A/HSPA1B
RAR Activation	0.457		0.00515	PRMT2
Clathrin-mediated Endocytosis Signaling	0.459		0.00518	CD2AP
ERK/MAPK Signaling	0.459		0.00518	MYC
Regulation of the Epithelial-Mesenchymal Transition Pathway	0.461		0.00521	WNT4
ILK Signaling	0.465		0.00526	MYC
Endothelin-1 Signaling	0.468		0.00532	MYC
Hepatic Fibrosis / Hepatic Stellate Cell Activation	0.472		0.00538	KLF6
Hepatic Cholestasis	0.474		0.00541	SLCO3A1
Cdc42 Signaling	0.511		0.00599	CDC42EP5
Dopamine-DARPP32 Feedback in cAMP Signaling	0.519		0.00613	PAWR
Aldosterone Signaling in Epithelial Cells	0.531		0.00633	HSPA1A/HSPA1B
Role of Pattern Recognition Receptors in Recognition of Bacteria and Viruses	0.54		0.00649	DDX58
Axonal Guidance Signaling	0.54		0.00413	GLIS2,WNT4
Corticotropin Releasing Hormone Signaling	0.562		0.0069	JUND
Xenobiotic Metabolism General Signaling Pathway	0.567		0.00699	NFE2L2
Cardiac β-adrenergic Signaling	0.573		0.00709	AKAP13
Ovarian Cancer Signaling	0.578		0.00719	WNT4
Human Embryonic Stem Cell Pluripotency	0.589		0.00741	WNT4
STAT3 Pathway	0.589		0.00741	MYC
Adipogenesis pathway	0.592		0.00746	DDIT3
P2Y Purigenic Receptor Signaling Pathway	0.612		0.00787	MYC
RhoA Signaling	0.624		0.00813	CDC42EP5
Role of NANOG in Mammalian Embryonic Stem Cell Pluripotency	0.636		0.0084	WNT4
Molecular Mechanisms of Cancer	0.673		0.00512	MYC,WNT4
Telomerase Signaling	0.677		0.00935	MYC
Chronic Myeloid Leukemia Signaling	0.692		0.00971	MYC
Mouse Embryonic Stem Cell Pluripotency	0.692		0.00971	MYC
Nitric Oxide Signaling in the Cardiovascular System	0.707		0.0101	SLC7A1
Amyotrophic Lateral Sclerosis Signaling	0.715		0.0103	GPX1
Bladder Cancer Signaling	0.715		0.0103	MYC
Neuregulin Signaling	0.719		0.0104	MYC
Acute Myeloid Leukemia Signaling	0.749		0.0112	MYC
PDGF Signaling	0.763		0.0116	MYC
Glucocorticoid Receptor Signaling	0.773		0.00595	HSPA1A/HSPA1B,KRT7
Apelin Adipocyte Signaling Pathway	0.781		0.0122	GPX1
Prolactin Signaling	0.786		0.0123	MYC
Thyroid Cancer Signaling	0.796		0.0127	MYC
IL-7 Signaling Pathway	0.801		0.0128	MYC
Role of Wnt/GSK-3β Signaling in the Pathogenesis of Influenza	0.801		0.0128	WNT4
Dopamine Receptor Signaling	0.806		0.013	COMT
IL-15 Signaling	0.817		0.0133	MYC
Hypoxia Signaling in the Cardiovascular System	0.822		0.0135	UBE2D3
Role of Macrophages, Fibroblasts and Endothelial Cells in Rheumatoid Arthritis	0.824		0.00641	MYC,WNT4
ERK5 Signaling	0.833		0.0139	MYC
Small Cell Lung Cancer Signaling	0.839		0.0141	MYC
Cell Cycle: G1/S Checkpoint Regulation	0.862		0.0149	MYC
Sirtuin Signaling Pathway	0.872		0.00687	MYC,NFE2L2
ErbB2-ErbB3 Signaling	0.875		0.0154	MYC
Activation of IRF by Cytosolic Pattern Recognition Receptors	0.887		0.0159	DDX58
Thrombopoietin Signaling	0.887		0.0159	MYC
Endometrial Cancer Signaling	0.907		0.0167	MYC
Protein Ubiquitination Pathway	0.917		0.00733	HSPA1A/HSPA1B,UBE2D3
Colorectal Cancer Metastasis Signaling	0.971		0.00791	MYC,WNT4
Myc Mediated Apoptosis Signaling	0.982		0.02	MYC
Signaling by Rho Family GTPases	0.998		0.0082	CDC42EP5,STMN1
Huntington's Disease Signaling	1.02		0.00844	DCTN1,HSPA1A/HSPA1B
Apelin Pancreas Signaling Pathway	1.03		0.0227	DDIT3
Role of RIG1-like Receptors in Antiviral Innate Immunity	1.03		0.0227	DDX58
Cardiac Hypertrophy Signaling (Enhanced)	1.04		0.00616	AKAP13,MYC,WNT4
EIF2 Signaling	1.06		0.00893	DDIT3,MYC
Mechanisms of Viral Exit from Host Cells	1.06		0.0244	CHMP2B
Noradrenaline and Adrenaline Degradation	1.13		0.0286	COMT
Superpathway of Inositol Phosphate Compounds	1.15		0.0101	MTMR7,PAWR
NRF2-mediated Oxidative Stress Response	1.19		0.0106	JUND,NFE2L2
Dopamine Degradation	1.19		0.0333	COMT
Sonic Hedgehog Signaling	1.21		0.0345	GLIS2
Protein Kinase A Signaling	1.24		0.00752	AKAP13,DUSP18,PTPRS
Estrogen-mediated S-phase Entry	1.25		0.0385	MYC
Wnt/β-catenin Signaling	1.26		0.0116	MYC,WNT4
3-phosphoinositide Biosynthesis	1.29		0.012	MTMR7,PAWR
Glutathione Redox Reactions I	1.29		0.0417	GPX1
Glioblastoma Multiforme Signaling	1.29		0.0121	MYC,WNT4
HOTAIR Regulatory Pathway	1.32		0.0125	MYC,WNT4
eNOS Signaling	1.32		0.0126	HSPA1A/HSPA1B,SLC7A1
Polyamine Regulation in Colon Cancer	1.33		0.0455	MYC
Hepatic Fibrosis Signaling Pathway	1.33		0.00815	GLIS2,MYC,WNT4
D-myo-inositol-5-phosphate Metabolism	1.33		0.0127	MTMR7,PAWR
3-phosphoinositide Degradation	1.33		0.0128	MTMR7,PAWR
Endoplasmic Reticulum Stress Pathway	1.34		0.0476	DDIT3
Coronavirus Pathogenesis Pathway	1.37		0.0133	DDIT3,DDX58
Factors Promoting Cardiogenesis in Vertebrates	1.37		0.0133	MYC,WNT4
Aryl Hydrocarbon Receptor Signaling	1.4		0.014	MYC,NFE2L2
D-myo-inositol (1,4,5,6)-Tetrakisphosphate Biosynthesis	1.41		0.0141	MTMR7,PAWR
D-myo-inositol (3,4,5,6)-tetrakisphosphate Biosynthesis	1.41		0.0141	MTMR7,PAWR
Assembly of RNA Polymerase III Complex	1.55		0.0769	GTF3A
p38 MAPK Signaling	1.56		0.0169	DDIT3,MYC
Role of PKR in Interferon Induction and Antiviral Response	1.56		0.0171	DDX58,HSPA1A/HSPA1B
Regulation Of The Epithelial Mesenchymal Transition In Development Pathway	1.83		0.0238	GLIS2,WNT4
Ceramide Biosynthesis	1.88		0.167	SPTLC2
Basal Cell Carcinoma Signaling	1.96		0.0278	GLIS2,WNT4
PCP pathway	2.11		0.0333	JUND,WNT4
L-DOPA Degradation	2.36		0.5	COMT
BAG2 Signaling Pathway	2.39		0.0465	HSPA1A/HSPA1B,MYC
Endocannabinoid Cancer Inhibition Pathway	2.41		0.021	DDIT3,MYC,SPTLC2
Unfolded protein response	3.59		0.0536	DDIT3,HSPA1A/HSPA1B,NFE2L2

## Sheet: M19_C2vC0
© 2000-2020 QIAGEN. All rights reserved.
Ingenuity Canonical Pathways	-log(p-value)	zScore	Ratio	Molecules
Sirtuin Signaling Pathway	0.317		0.00344	TOMM7
Protein Ubiquitination Pathway	0.337		0.00366	RPS27A
Huntington's Disease Signaling	0.383		0.00422	RPS27A
Clathrin-mediated Endocytosis Signaling	0.452		0.00518	RPS27A
Wnt/β-catenin Signaling	0.491		0.00578	RPS27A
Necroptosis Signaling Pathway	0.526		0.00637	TOMM7
Hereditary Breast Cancer Signaling	0.568		0.00714	RPS27A
GABA Receptor Signaling	0.716		0.0105	RPS27A
Renal Cell Carcinoma Signaling	0.783		0.0125	RPS27A
Toll-like Receptor Signaling	0.804		0.0132	RPS27A
Cell Cycle: G1/S Checkpoint Regulation	0.854		0.0149	RPL11
mTOR Signaling	20.1		0.0762	RPS11,RPS12,RPS15,RPS15A,RPS16,RPS17,RPS18,RPS19,RPS20,RPS23,RPS24,RPS25,RPS27A,RPS28,RPS29,RPS8
Regulation of eIF4 and p70S6K Signaling	22.1		0.102	RPS11,RPS12,RPS15,RPS15A,RPS16,RPS17,RPS18,RPS19,RPS20,RPS23,RPS24,RPS25,RPS27A,RPS28,RPS29,RPS8
Coronavirus Pathogenesis Pathway	22.5	-3.5	0.107	RPS11,RPS12,RPS15,RPS15A,RPS16,RPS17,RPS18,RPS19,RPS20,RPS23,RPS24,RPS25,RPS27A,RPS28,RPS29,RPS8
EIF2 Signaling	71.2	2.44949	0.179	RPL11,RPL12,RPL13A,RPL14,RPL17,RPL19,RPL22,Rpl22l1,RPL23,RPL24,RPL26,RPL27A,RPL28,RPL30,RPL31,RPL35,RPL35A,Rpl36a,RPL37,RPL37A,RPL38,RPL39,RPL6,RPLP2,RPS11,RPS12,RPS15,RPS15A,RPS16,RPS17,RPS18,RPS19,RPS20,RPS23,RPS24,RPS25,RPS27A,RPS28,RPS29,RPS8

## Sheet: M27_C4vC0
© 2000-2020 QIAGEN. All rights reserved.
Ingenuity Canonical Pathways	-log(p-value)	zScore	Ratio	Molecules
Protein Kinase A Signaling	0.236		0.00251	TGFB3
Systemic Lupus Erythematosus In T Cell Signaling Pathway	0.287		0.00299	EZR
Estrogen Receptor Signaling	0.293		0.00305	EIF4EBP1
Synaptogenesis Signaling Pathway	0.308		0.00321	EIF4EBP1
Sirtuin Signaling Pathway	0.329		0.00344	TUBA1B
Insulin Secretion Signaling Pathway	0.388		0.00412	EIF4EBP1
EIF2 Signaling	0.415		0.00446	EIF1AX
AMPK Signaling	0.43		0.00467	EIF4EBP1
Integrin Signaling	0.432		0.00469	ITGA3
mTOR Signaling	0.437		0.00476	EIF4EBP1
HIF1α Signaling	0.445		0.00488	EIF4EBP1
Adrenomedullin signaling pathway	0.459		0.00508	CEBPB
Natural Killer Cell Signaling	0.459		0.00508	IL18R1
PPARα/RXRα Activation	0.472		0.00526	TGFB3
Regulation Of The Epithelial Mesenchymal Transition By Growth Factors Pathway	0.476		0.00532	TGFB3
Hepatic Cholestasis	0.481		0.00541	TGFB3
Ephrin Receptor Signaling	0.491		0.00556	ITGA3
Tight Junction Signaling	0.516		0.00595	TGFB3
Cdc42 Signaling	0.518		0.00599	ITGA3
HMGB1 Signaling	0.522		0.00606	TGFB3
Tec Kinase Signaling	0.524		0.0061	ITGA3
Aldosterone Signaling in Epithelial Cells	0.538		0.00633	HSPB1
Necroptosis Signaling Pathway	0.54		0.00637	BIRC2
Role of Pattern Recognition Receptors in Recognition of Bacteria and Viruses	0.547		0.00649	TGFB3
Epithelial Adherens Junction Signaling	0.552		0.00658	TUBA1B
Axonal Guidance Signaling	0.552		0.00413	ITGA3,TUBA1B
Phagosome Maturation	0.555		0.00662	TUBA1B
Factors Promoting Cardiogenesis in Vertebrates	0.557		0.00667	TGFB3
Endocannabinoid Cancer Inhibition Pathway	0.575		0.00699	CCND2
Type II Diabetes Mellitus Signaling	0.577		0.00704	CEBPB
Insulin Receptor Signaling	0.583		0.00714	EIF4EBP1
Th2 Pathway	0.594		0.00735	JAG1
Human Embryonic Stem Cell Pluripotency	0.596		0.00741	TGFB3
Adipogenesis pathway	0.599		0.00746	CEBPB
Semaphorin Neuronal Repulsive Signaling Pathway	0.611		0.00769	ITGA3
Reelin Signaling in Neurons	0.613		0.00775	ITGA3
14-3-3-mediated Signaling	0.619		0.00787	TUBA1B
Atherosclerosis Signaling	0.619		0.00787	CSF1
PTEN Signaling	0.622		0.00794	ITGA3
Phagosome Formation	0.625		0.008	ITGA3
RhoA Signaling	0.631		0.00813	EZR
Th1 Pathway	0.638		0.00826	IL18R1
Role of NANOG in Mammalian Embryonic Stem Cell Pluripotency	0.644		0.0084	IL6ST
Airway Pathology in Chronic Obstructive Pulmonary Disease	0.647		0.00847	TGFB3
Rac Signaling	0.667		0.00893	ITGA3
Pancreatic Adenocarcinoma Signaling	0.678		0.00917	TGFB3
CDK5 Signaling	0.681		0.00926	ITGA3
Paxillin Signaling	0.681		0.00926	ITGA3
Telomerase Signaling	0.685		0.00935	ETS2
Virus Entry via Endocytic Pathways	0.685		0.00935	ITGA3
PD-1, PD-L1 cancer immunotherapy pathway	0.689		0.00943	TGFB3
Chronic Myeloid Leukemia Signaling	0.7		0.00971	TGFB3
Mouse Embryonic Stem Cell Pluripotency	0.7		0.00971	IL6ST
Apoptosis Signaling	0.715		0.0101	BIRC2
VEGF Signaling	0.715		0.0101	EIF1AX
p53 Signaling	0.719		0.0102	CCND2
Amyotrophic Lateral Sclerosis Signaling	0.723		0.0103	BIRC2
PAK Signaling	0.723		0.0103	ITGA3
TGF-β Signaling	0.727		0.0104	TGFB3
FAK Signaling	0.731		0.0105	ITGA3
ErbB Signaling	0.735		0.0106	ERBB3
Fcγ Receptor-mediated Phagocytosis in Macrophages and Monocytes	0.735		0.0106	EZR
Regulation of Actin-based Motility by Rho	0.735		0.0106	ITGA3
Altered T Cell and B Cell Signaling in Rheumatoid Arthritis	0.753		0.0111	CSF1
Acute Myeloid Leukemia Signaling	0.757		0.0112	EIF4EBP1
Regulation of IL-2 Expression in Activated and Anergic T Lymphocytes	0.757		0.0112	TGFB3
RANK Signaling in Osteoclasts	0.761		0.0114	BIRC2
HER-2 Signaling in Breast Cancer	0.78		0.0119	ERBB3
Regulation Of The Epithelial Mesenchymal Transition In Development Pathway	0.78		0.0119	JAG1
Glucocorticoid Receptor Signaling	0.787		0.00595	CEBPB,TGFB3
NF-κB Activation by Viruses	0.789		0.0122	ITGA3
Prolactin Signaling	0.794		0.0123	CEBPB
FLT3 Signaling in Hematopoietic Progenitor Cells	0.799		0.0125	EIF4EBP1
IL-17 Signaling	0.799		0.0125	CEBPB
JAK/Stat Signaling	0.799		0.0125	CEBPB
VDR/RXR Activation	0.809		0.0128	CEBPB
Macropinocytosis Signaling	0.82		0.0132	CSF1
Caveolar-mediated Endocytosis Signaling	0.836		0.0137	ITGA3
Actin Nucleation by ARP-WASP Complex	0.841		0.0139	ITGA3
ERK5 Signaling	0.841		0.0139	IL6ST
Small Cell Lung Cancer Signaling	0.847		0.0141	BIRC2
Remodeling of Epithelial Adherens Junctions	0.864		0.0147	TUBA1B
Breast Cancer Regulation by Stathmin1	0.871		0.00508	ADGRG1,CCND2,TUBA1B
ErbB2-ErbB3 Signaling	0.883		0.0154	ERBB3
Induction of Apoptosis by HIV1	0.908		0.0164	BIRC2
Retinoic acid Mediated Apoptosis Signaling	0.915		0.0167	RARG
MSP-RON Signaling Pathway	0.929		0.0172	CSF1
CNTF Signaling	0.936		0.0175	IL6ST
Unfolded protein response	0.943		0.0179	CEBPB
Lymphotoxin β Receptor Signaling	0.966		0.0189	BIRC2
UVB-Induced MAPK Signaling	0.974		0.0192	EIF4EBP1
Phospholipase C Signaling	0.975		0.00778	AHNAK,ITGA3
Colorectal Cancer Metastasis Signaling	0.986		0.00791	IL6ST,TGFB3
TNFR1 Signaling	0.99		0.02	BIRC2
Hematopoiesis from Pluripotent Stem Cells	0.998		0.0204	CSF1
Signaling by Rho Family GTPases	1.01		0.0082	EZR,ITGA3
FAT10 Cancer Signaling Pathway	1.02		0.0217	TGFB3
PFKFB4 Signaling Pathway	1.02		0.0217	TGFB3
Role of Oct4 in Mammalian Embryonic Stem Cell Pluripotency	1.02		0.0217	ETS2
Cardiac Hypertrophy Signaling	1.02		0.00833	HSPB1,TGFB3
Oncostatin M Signaling	1.05		0.0233	IL6ST
Sperm Motility	1.08		0.00897	DDR1,ERBB3
Antiproliferative Role of TOB in T Cell Signaling	1.09		0.0256	TGFB3
Inhibition of Matrix Metalloproteases	1.09		0.0256	HSPG2
Actin Cytoskeleton Signaling	1.1		0.00917	EZR,ITGA3
Role of NFAT in Cardiac Hypertrophy	1.11		0.00935	IL6ST,TGFB3
Notch Signaling	1.11		0.027	JAG1
IL-17A Signaling in Fibroblasts	1.14		0.0286	CEBPB
TWEAK Signaling	1.14		0.0286	BIRC2
Inhibition of Angiogenesis by TSP1	1.15		0.0294	HSPG2
IL-8 Signaling	1.16		0.01	CCND2,EIF4EBP1
Gap Junction Signaling	1.17		0.0101	GJB3,TUBA1B
Leukocyte Extravasation Signaling	1.17		0.0102	EZR,ITGA3
RAR Activation	1.18		0.0103	RARG,TGFB3
Regulation of the Epithelial-Mesenchymal Transition Pathway	1.19		0.0104	JAG1,TGFB3
TNFR2 Signaling	1.2		0.0333	BIRC2
Hepatic Fibrosis / Hepatic Stellate Cell Activation	1.22		0.0108	CSF1,TGFB3
RhoGDI Signaling	1.24		0.0111	EZR,ITGA3
Acute Phase Response Signaling	1.24		0.0112	CEBPB,IL6ST
Wnt/β-catenin Signaling	1.27		0.0116	RARG,TGFB3
Role of JAK family kinases in IL-6-type Cytokine Signaling	1.28		0.04	IL6ST
Th1 and Th2 Activation Pathway	1.28		0.0117	IL18R1,JAG1
Apelin Cardiac Fibroblast Signaling Pathway	1.31		0.0435	TGFB3
Hepatic Fibrosis Signaling Pathway	1.35		0.00815	CEBPB,ITGA3,TGFB3
GADD45 Signaling	1.4		0.0526	CCND2
STAT3 Pathway	1.46		0.0148	IL18R1,IL6ST
IL-12 Signaling and Production in Macrophages	1.48		0.0152	CEBPB,TGFB3
White Adipose Tissue Browning Pathway	1.5		0.0155	CEBPB,RARG
IL-15 Production	1.55		0.0165	DDR1,ERBB3
p38 MAPK Signaling	1.57		0.0169	HSPB1,TGFB3
Neuroinflammation Signaling Pathway	1.58		0.01	BIRC2,MFGE8,TGFB3
Role of Tissue Factor in Cancer	1.58		0.0171	CSF1,ITGA3
Hematopoiesis from Multipotent Stem Cells	1.59		0.0833	CSF1
HGF Signaling	1.62		0.018	ETS2,ITGA3
Systemic Lupus Erythematosus In B Cell Signaling Pathway	1.67		0.0109	CCND2,IL6ST,TGFB3
Protein Ubiquitination Pathway	1.68		0.011	BIRC2,HSPB1,USP16
Neuregulin Signaling	1.74		0.0208	ERBB3,ITGA3
Death Receptor Signaling	1.78		0.022	BIRC2,HSPB1
Cyclins and Cell Cycle Regulation	1.88		0.0247	CCND2,TGFB3
Selenocysteine Biosynthesis II (Archaea and Eukaryotes)	1.89		0.167	SEPHS2
Agrin Interactions at Neuromuscular Junction	1.91		0.0256	ERBB3,ITGA3
T Helper Cell Differentiation	1.96		0.0274	IL18R1,IL6ST
Molecular Mechanisms of Cancer	2		0.0102	BIRC2,CCND2,ITGA3,TGFB3
Cell Cycle: G1/S Checkpoint Regulation	2.04		0.0299	CCND2,TGFB3
Regulation of Cellular Mechanics by Calpain Protease	2.06		0.0308	EZR,ITGA3
Agranulocyte Adhesion and Diapedesis	2.08		0.0155	EZR,ITGA3,SDC4
Sertoli Cell-Sertoli Cell Junction Signaling	2.13		0.0162	ITGA3,TGFB3,TUBA1B
Granulocyte Adhesion and Diapedesis	2.16		0.0167	EZR,ITGA3,SDC4
Germ Cell-Sertoli Cell Junction Signaling	2.22		0.0175	ITGA3,TGFB3,TUBA1B
Regulation of eIF4 and p70S6K Signaling	2.33		0.0191	EIF1AX,EIF4EBP1,ITGA3
Role of Macrophages, Fibroblasts and Endothelial Cells in Rheumatoid Arthritis	2.34		0.0128	CEBPB,CSF1,IL18R1,IL6ST
Senescence Pathway	2.54	1	0.0145	CEBPB,EIF4EBP1,ETS2,TGFB3
IL-6 Signaling	2.6		0.024	CEBPB,HSPB1,IL6ST
Role of Osteoblasts, Osteoclasts and Chondrocytes in Rheumatoid Arthritis	2.89		0.0182	BIRC2,CSF1,IL18R1,ITGA3
Osteoarthritis Pathway	2.96	2	0.019	CEBPB,ITGA3,JAG1,SDC4
ERK/MAPK Signaling	3.1	1	0.0207	EIF4EBP1,ETS2,HSPB1,ITGA3
Cardiac Hypertrophy Signaling (Enhanced)	3.22	1.63299	0.0123	EIF4EBP1,HSPB1,IL18R1,IL6ST,ITGA3,TGFB3
PI3K/AKT Signaling	3.26		0.0229	EIF4EBP1,IL18R1,IL6ST,ITGA3
Aryl Hydrocarbon Receptor Signaling	3.59		0.028	CCND2,HSPB1,RARG,TGFB3

## Sheet: M28_C0vC2
© 2000-2020 QIAGEN. All rights reserved.
Ingenuity Canonical Pathways	-log(p-value)	zScore	Ratio	Molecules
Molecular Mechanisms of Cancer	0.253		0.00256	JAK1
Sirtuin Signaling Pathway	0.342		0.00344	MAP1LC3B
Xenobiotic Metabolism Signaling	0.347		0.00348	HSP90AA1
Protein Ubiquitination Pathway	0.363		0.00366	HSP90AA1
Role of Osteoblasts, Osteoclasts and Chondrocytes in Rheumatoid Arthritis	0.435		0.00455	Calm1 (includes others)
Actin Cytoskeleton Signaling	0.438		0.00459	ACTG1
Integrin Signaling	0.446		0.00469	ACTG1
mTOR Signaling	0.451		0.00476	EIF3A
Thrombin Signaling	0.455		0.00481	GNG5
HIF1α Signaling	0.46		0.00488	HSP90AA1
IL-8 Signaling	0.468		0.005	GNG5
Superpathway of Inositol Phosphate Compounds	0.47		0.00503	DUSP1
Adrenomedullin signaling pathway	0.474		0.00508	Calm1 (includes others)
RAR Activation	0.479		0.00515	DUSP1
Clathrin-mediated Endocytosis Signaling	0.481		0.00518	ACTG1
Regulation of the Epithelial-Mesenchymal Transition Pathway	0.483		0.00521	JAK1
Xenobiotic Metabolism PXR Signaling Pathway	0.483		0.00521	HSP90AA1
PPARα/RXRα Activation	0.487		0.00526	HSP90AA1
Xenobiotic Metabolism CAR Signaling Pathway	0.488		0.00529	HSP90AA1
Production of Nitric Oxide and Reactive Oxygen Species in Macrophages	0.49		0.00532	JAK1
Regulation Of The Epithelial Mesenchymal Transition By Growth Factors Pathway	0.49		0.00532	JAK1
Granulocyte Adhesion and Diapedesis	0.506		0.00556	CLDN6
T Cell Exhaustion Signaling Pathway	0.516		0.00571	JAK1
Th1 and Th2 Activation Pathway	0.524		0.00585	JAK1
CXCR4 Signaling	0.533		0.00599	GNG5
3-phosphoinositide Biosynthesis	0.535		0.00602	DUSP1
D-myo-inositol-5-phosphate Metabolism	0.556		0.00637	DUSP1
Necroptosis Signaling Pathway	0.556		0.00637	JAK1
Regulation of eIF4 and p70S6K Signaling	0.556		0.00637	EIF3A
3-phosphoinositide Degradation	0.558		0.00641	DUSP1
Gustation Pathway	0.563		0.00649	GNG5
Relaxin Signaling	0.573		0.00667	GNG5
Cardiac Hypertrophy Signaling (Enhanced)	0.574		0.00411	Calm1 (includes others),GNG5
Axonal Guidance Signaling	0.578		0.00413	GNG5,TUBB2A
Aryl Hydrocarbon Receptor Signaling	0.59		0.00699	HSP90AA1
D-myo-inositol (1,4,5,6)-Tetrakisphosphate Biosynthesis	0.593		0.00704	DUSP1
D-myo-inositol (3,4,5,6)-tetrakisphosphate Biosynthesis	0.593		0.00704	DUSP1
Cardiac β-adrenergic Signaling	0.596		0.00709	GNG5
Insulin Receptor Signaling	0.598		0.00714	JAK1
Th2 Pathway	0.609		0.00735	JAK1
Adipogenesis pathway	0.615		0.00746	SAP18
p70S6K Signaling	0.629		0.00775	JAK1
Endocannabinoid Neuronal Synapse Pathway	0.632		0.00781	GNG5
14-3-3-mediated Signaling	0.635		0.00787	TUBB2A
Atherosclerosis Signaling	0.635		0.00787	F3
Gαi Signaling	0.641		0.008	GNG5
RhoA Signaling	0.647		0.00813	ACTG1
G Beta Gamma Signaling	0.65		0.0082	GNG5
IL-15 Production	0.654		0.00826	JAK1
Th1 Pathway	0.654		0.00826	JAK1
CD28 Signaling in T Helper Cells	0.657		0.00833	Calm1 (includes others)
GP6 Signaling Pathway	0.66		0.0084	Calm1 (includes others)
Role of NANOG in Mammalian Embryonic Stem Cell Pluripotency	0.66		0.0084	JAK1
Role of Tissue Factor in Cancer	0.667		0.00855	F3
Apelin Endothelial Signaling Pathway	0.673		0.0087	Calm1 (includes others)
GPCR-Mediated Nutrient Sensing in Enteroendocrine Cells	0.683		0.00893	GNG5
Type I Diabetes Mellitus Signaling	0.687		0.00901	JAK1
iCOS-iCOSL Signaling in T Helper Cells	0.687		0.00901	Calm1 (includes others)
Glioma Signaling	0.69		0.00909	Calm1 (includes others)
Pancreatic Adenocarcinoma Signaling	0.694		0.00917	JAK1
Paxillin Signaling	0.697		0.00926	ACTG1
Telomerase Signaling	0.701		0.00935	HSP90AA1
PD-1, PD-L1 cancer immunotherapy pathway	0.705		0.00943	JAK1
T Cell Receptor Signaling	0.708		0.00952	Calm1 (includes others)
IGF-1 Signaling	0.712		0.00962	JAK1
PPAR Signaling	0.712		0.00962	HSP90AA1
Mouse Embryonic Stem Cell Pluripotency	0.716		0.00971	JAK1
SAPK/JNK Signaling	0.72		0.0098	GNG5
VEGF Signaling	0.731		0.0101	ACTG1
Neuregulin Signaling	0.744		0.0104	HSP90AA1
FAK Signaling	0.748		0.0105	ACTG1
Fcγ Receptor-mediated Phagocytosis in Macrophages and Monocytes	0.752		0.0106	ACTG1
Death Receptor Signaling	0.765		0.011	ACTG1
IL-1 Signaling	0.765		0.011	GNG5
Crosstalk between Dendritic Cells and Natural Killer Cells	0.773		0.0112	ACTG1
Regulation of IL-2 Expression in Activated and Anergic T Lymphocytes	0.773		0.0112	Calm1 (includes others)
RANK Signaling in Osteoclasts	0.778		0.0114	Calm1 (includes others)
PDGF Signaling	0.787		0.0116	JAK1
IL-4 Signaling	0.792		0.0118	JAK1
Xenobiotic Metabolism AHR Signaling Pathway	0.792		0.0118	HSP90AA1
TR/RXR Activation	0.796		0.0119	GPS2
Chemokine Signaling	0.816		0.0125	Calm1 (includes others)
IL-17 Signaling	0.816		0.0125	JAK1
JAK/Stat Signaling	0.816		0.0125	JAK1
Systemic Lupus Erythematosus In T Cell Signaling Pathway	0.819		0.00599	ATF4,CREB5
IL-3 Signaling	0.821		0.0127	JAK1
Agrin Interactions at Neuromuscular Junction	0.826		0.0128	ACTG1
IL-7 Signaling Pathway	0.826		0.0128	JAK1
Antiproliferative Role of Somatostatin Receptor 2	0.831		0.013	GNG5
IL-15 Signaling	0.842		0.0133	JAK1
Caveolar-mediated Endocytosis Signaling	0.853		0.0137	ACTG1
Ephrin B Signaling	0.858		0.0139	GNG5
Melatonin Signaling	0.858		0.0139	Calm1 (includes others)
IL-10 Signaling	0.875		0.0145	JAK1
Role of JAK1 and JAK3 in γc Cytokine Signaling	0.875		0.0145	JAK1
SPINK1 General Cancer Pathway	0.875		0.0145	JAK1
Nur77 Signaling in T Lymphocytes	0.881		0.0147	Calm1 (includes others)
Calcium-induced T Lymphocyte Apoptosis	0.893		0.0152	Calm1 (includes others)
Mitotic Roles of Polo-Like Kinase	0.893		0.0152	HSP90AA1
IL-17A Signaling in Airway Cells	0.906		0.0156	JAK1
IL-2 Signaling	0.925		0.0164	JAK1
PCP pathway	0.932		0.0167	JUNB
MSP-RON Signaling Pathway	0.946		0.0172	ACTG1
CNTF Signaling	0.953		0.0175	JAK1
Senescence Pathway	0.956		0.00727	Calm1 (includes others),RING1
Systemic Lupus Erythematosus In B Cell Signaling Pathway	0.956		0.00727	Calm1 (includes others),JAK1
Unfolded protein response	0.96		0.0179	ATF4
EGF Signaling	0.968		0.0182	JAK1
Colorectal Cancer Metastasis Signaling	1.02		0.00791	GNG5,JAK1
nNOS Signaling in Neurons	1.03		0.0213	Calm1 (includes others)
Signaling by Rho Family GTPases	1.04		0.0082	ACTG1,GNG5
Cardiac Hypertrophy Signaling	1.06		0.00833	Calm1 (includes others),GNG5
BAG2 Signaling Pathway	1.07		0.0233	HSP90AA1
Oncostatin M Signaling	1.07		0.0233	JAK1
nNOS Signaling in Skeletal Muscle Cells	1.09		0.0244	Calm1 (includes others)
EIF2 Signaling	1.11		0.00893	ATF4,EIF3A
Sperm Motility	1.11		0.00897	Calm1 (includes others),JAK1
AMPK Signaling	1.14		0.00935	ATF4,CREB5
Role of NFAT in Cardiac Hypertrophy	1.14		0.00935	Calm1 (includes others),GNG5
Interferon Signaling	1.14		0.0278	JAK1
Osteoarthritis Pathway	1.15		0.00948	ATF4,CREB5
Coagulation System	1.16		0.0286	F3
DNA Methylation and Transcriptional Repression Signaling	1.16		0.0286	SAP18
Role of JAK2 in Hormone-like Cytokine Signaling	1.17		0.0294	JAK1
IL-9 Signaling	1.18		0.0303	JAK1
Gap Junction Signaling	1.2		0.0101	ACTG1,TUBB2A
Leukocyte Extravasation Signaling	1.2		0.0102	ACTG1,CLDN6
G Protein Signaling Mediated by Tubby	1.21		0.0323	GNG5
Agranulocyte Adhesion and Diapedesis	1.22		0.0104	ACTG1,CLDN6
Dendritic Cell Maturation	1.26		0.0109	ATF4,CREB5
Role of NFAT in Regulation of the Immune Response	1.27		0.011	Calm1 (includes others),GNG5
RhoGDI Signaling	1.27		0.0111	ACTG1,GNG5
PI3K/AKT Signaling	1.29		0.0114	HSP90AA1,JAK1
Role of JAK family kinases in IL-6-type Cytokine Signaling	1.3		0.04	JAK1
Germ Cell-Sertoli Cell Junction Signaling	1.31		0.0117	ACTG1,TUBB2A
IL-22 Signaling	1.31		0.0417	JAK1
Role of JAK1, JAK2 and TYK2 in Interferon Signaling	1.31		0.0417	JAK1
Tight Junction Signaling	1.33		0.0119	ACTG1,CLDN6
eNOS Signaling	1.37		0.0126	Calm1 (includes others),HSP90AA1
Endoplasmic Reticulum Stress Pathway	1.37		0.0476	ATF4
Aldosterone Signaling in Epithelial Cells	1.37		0.0127	DUSP1,HSP90AA1
Gαq Signaling	1.37		0.0127	Calm1 (includes others),GNG5
Epithelial Adherens Junction Signaling	1.4		0.0132	ACTG1,TUBB2A
Coronavirus Pathogenesis Pathway	1.41		0.0133	ATF4,JAK1
Factors Promoting Cardiogenesis in Vertebrates	1.41		0.0133	ATF4,CREB5
FAT10 Signaling Pathway	1.44		0.0556	MAP1LC3B
Breast Cancer Regulation by Stathmin1	1.48		0.00677	ATF4,CREB5,GNG5,TUBB2A
PI3K Signaling in B Lymphocytes	1.48		0.0145	ATF4,Calm1 (includes others)
Iron homeostasis signaling pathway	1.49		0.0146	ATP6V0E1,JAK1
Extrinsic Prothrombin Activation Pathway	1.49		0.0625	F3
Cellular Effects of Sildenafil (Viagra)	1.52		0.0153	ACTG1,Calm1 (includes others)
White Adipose Tissue Browning Pathway	1.53		0.0155	ATF4,CREB5
CCR3 Signaling in Eosinophils	1.57		0.0161	Calm1 (includes others),GNG5
Role of Macrophages, Fibroblasts and Endothelial Cells in Rheumatoid Arthritis	1.57		0.00962	ATF4,Calm1 (includes others),CREB5
Synaptogenesis Signaling Pathway	1.57		0.00962	ATF4,Calm1 (includes others),CREB5
Role of PKR in Interferon Induction and Antiviral Response	1.61		0.0171	HSP90AA1,JAK1
fMLP Signaling in Neutrophils	1.62		0.0172	Calm1 (includes others),GNG5
Neuroinflammation Signaling Pathway	1.62		0.01	ATF4,CREB5,JAK1
NGF Signaling	1.63		0.0175	ATF4,CREB5
Virus Entry via Endocytic Pathways	1.68		0.0187	ACTG1,CXADR
G-Protein Coupled Receptor Signaling	1.73		0.011	ATF4,CREB5,DUSP1
Nitric Oxide Signaling in the Cardiovascular System	1.75		0.0202	Calm1 (includes others),HSP90AA1
ATM Signaling	1.76		0.0206	ATF4,CREB5
α-Adrenergic Signaling	1.77		0.0208	Calm1 (includes others),GNG5
CCR5 Signaling in Macrophages	1.79		0.0213	Calm1 (includes others),GNG5
Melanocyte Development and Pigmentation Signaling	1.79		0.0213	ATF4,CREB5
Th17 Activation Pathway	1.82		0.022	HSP90AA1,JAK1
Insulin Secretion Signaling Pathway	1.86		0.0123	ATF4,CREB5,JAK1
FGF Signaling	1.88		0.0238	ATF4,CREB5
Huntington's Disease Signaling	1.89		0.0127	ATF4,CREB5,GNG5
FLT3 Signaling in Hematopoietic Progenitor Cells	1.92		0.025	ATF4,CREB5
Neurotrophin/TRK Signaling	1.97		0.0263	ATF4,CREB5
Estrogen-Dependent Breast Cancer Signaling	1.99		0.027	ATF4,CREB5
ERK5 Signaling	2.01		0.0278	ATF4,CREB5
Calcium Signaling	2.05		0.0146	ATF4,Calm1 (includes others),CREB5
Remodeling of Epithelial Adherens Junctions	2.06		0.0294	ACTG1,TUBB2A
ERK/MAPK Signaling	2.13		0.0155	ATF4,CREB5,DUSP1
Wnt/Ca+ pathway	2.14		0.0323	ATF4,CREB5
ILK Signaling	2.15		0.0158	ACTG1,ATF4,CREB5
Autophagy	2.15		0.0328	LAMP1,MAP1LC3B
NRF2-mediated Oxidative Stress Response	2.15		0.0159	ACTG1,ATF4,JUNB
Hepatic Fibrosis Signaling Pathway	2.16	0	0.0109	ATF4,Calm1 (includes others),CREB5,JAK1
B Cell Receptor Signaling	2.18		0.0162	ATF4,Calm1 (includes others),CREB5
Sertoli Cell-Sertoli Cell Junction Signaling	2.18		0.0162	ACTG1,CLDN6,TUBB2A
Glutamate Receptor Signaling	2.21		0.0351	Calm1 (includes others),GNG5
Ephrin Receptor Signaling	2.21		0.0167	ATF4,CREB5,GNG5
Glucocorticoid Receptor Signaling	2.3		0.0119	DUSP1,HSP90AA1,JAK1,KRT17
Tec Kinase Signaling	2.32		0.0183	ACTG1,GNG5,JAK1
Dopamine-DARPP32 Feedback in cAMP Signaling	2.33		0.0184	ATF4,Calm1 (includes others),CREB5
PFKFB4 Signaling Pathway	2.39		0.0435	ATF4,CREB5
iNOS Signaling	2.41		0.0444	Calm1 (includes others),JAK1
Phagosome Maturation	2.42		0.0199	ATP6V0E1,LAMP1,TUBB2A
Role of IL-17F in Allergic Inflammatory Airway Diseases	2.47		0.0476	ATF4,CREB5
Corticotropin Releasing Hormone Signaling	2.47		0.0207	ATF4,Calm1 (includes others),CREB5
Mechanisms of Viral Exit from Host Cells	2.49		0.0488	ACTG1,VPS36
Endocannabinoid Cancer Inhibition Pathway	2.49		0.021	ATF4,CREB5,NUPR1
Androgen Signaling	2.55		0.0221	Calm1 (includes others),GNG5,HSP90AA1
Synaptic Long Term Potentiation	2.62		0.0233	ATF4,Calm1 (includes others),CREB5
P2Y Purigenic Receptor Signaling Pathway	2.64		0.0236	ATF4,CREB5,GNG5
Circadian Rhythm Signaling	2.67		0.0606	ATF4,CREB5
Phospholipase C Signaling	2.71	2	0.0156	ATF4,Calm1 (includes others),CREB5,GNG5
p38 MAPK Signaling	2.73		0.0254	ATF4,CREB5,DUSP1
Endocannabinoid Developing Neuron Pathway	2.76		0.0261	ATF4,CREB5,GNG5
Opioid Signaling Pathway	2.77	2	0.0162	ATF4,Calm1 (includes others),CREB5,GNG5
Gαs Signaling	2.85		0.028	ATF4,CREB5,GNG5
Protein Kinase A Signaling	2.87	1.34164	0.0125	ATF4,Calm1 (includes others),CREB5,DUSP1,GNG5
cAMP-mediated signaling	2.9	1	0.0175	ATF4,Calm1 (includes others),CREB5,DUSP1
Prostate Cancer Signaling	3.05		0.033	ATF4,CREB5,HSP90AA1
CREB Signaling in Neurons	3.06		0.0193	ATF4,Calm1 (includes others),CREB5,GNG5
Hypoxia Signaling in the Cardiovascular System	3.32		0.0405	ATF4,CREB5,HSP90AA1
GNRH Signaling	3.35		0.0231	ATF4,Calm1 (includes others),CREB5,GNG5
Estrogen Receptor Signaling	4.25	1.34164	0.0183	ATF4,CREB5,GNG5,GPS2,HSP90AA1,JAK1

## Sheet: M3_C4vC2
© 2000-2020 QIAGEN. All rights reserved.
Ingenuity Canonical Pathways	-log(p-value)	zScore	Ratio	Molecules
Protein Ubiquitination Pathway	0		0.00366	BIRC3
Synaptogenesis Signaling Pathway	0		0.00321	RRAS
Huntington's Disease Signaling	0.2		0.00422	CASP4
Systemic Lupus Erythematosus Signaling	0.209		0.00437	RRAS
EIF2 Signaling	0.214		0.00446	RRAS
CREB Signaling in Neurons	0.236		0.00483	RRAS
Gap Junction Signaling	0.248		0.00505	RRAS
Clathrin-mediated Endocytosis Signaling	0.255		0.00518	ARF6
Xenobiotic Metabolism PXR Signaling Pathway	0.257		0.00521	PPP1R14B
NRF2-mediated Oxidative Stress Response	0.261		0.00529	RRAS
Xenobiotic Metabolism CAR Signaling Pathway	0.261		0.00529	PPP2R1A
Mitochondrial Dysfunction	0.29		0.00585	HTRA2
3-phosphoinositide Biosynthesis	0.299		0.00602	PPP1R14B
D-myo-inositol-5-phosphate Metabolism	0.316		0.00637	PPP1R14B
Phagosome Maturation	0.328		0.00662	DYNLL1
Factors Promoting Cardiogenesis in Vertebrates	0.33		0.00667	TGFB2
Xenobiotic Metabolism General Signaling Pathway	0.345		0.00699	RRAS
D-myo-inositol (1,4,5,6)-Tetrakisphosphate Biosynthesis	0.348		0.00704	PPP1R14B
D-myo-inositol (3,4,5,6)-tetrakisphosphate Biosynthesis	0.348		0.00704	PPP1R14B
Ovarian Cancer Signaling	0.354		0.00719	RRAS
Androgen Signaling	0.361		0.00735	NFKB2
Th2 Pathway	0.361		0.00735	ICAM1
Human Embryonic Stem Cell Pluripotency	0.364		0.00741	TGFB2
FXR/RXR Activation	0.386		0.00794	C3
Gαi Signaling	0.389		0.008	RRAS
Phagosome Formation	0.389		0.008	RHOB
G Beta Gamma Signaling	0.397		0.0082	RRAS
IL-15 Production	0.4		0.00826	NFKB2
Role of NANOG in Mammalian Embryonic Stem Cell Pluripotency	0.405		0.0084	RRAS
p38 MAPK Signaling	0.408		0.00847	TGFB2
Role of Tissue Factor in Cancer	0.411		0.00855	RRAS
Endocannabinoid Developing Neuron Pathway	0.417		0.0087	RRAS
Mouse Embryonic Stem Cell Pluripotency	0.455		0.00971	RRAS
SAPK/JNK Signaling	0.458		0.0098	RRAS
Kinetochore Metaphase Signaling Pathway	0.462		0.0099	PPP1R14B
Sirtuin Signaling Pathway	0.464		0.00687	GADD45B,NFKB2
UVA-Induced MAPK Signaling	0.472		0.0102	RRAS
Amyotrophic Lateral Sclerosis Signaling	0.476		0.0103	BIRC3
Neuregulin Signaling	0.479		0.0104	RRAS
α-Adrenergic Signaling	0.479		0.0104	RRAS
Fcγ Receptor-mediated Phagocytosis in Macrophages and Monocytes	0.487		0.0106	ARF6
Melanocyte Development and Pigmentation Signaling	0.487		0.0106	RRAS
CTLA4 Signaling in Cytotoxic T Lymphocytes	0.506		0.0112	PPP2R1A
Xenobiotic Metabolism AHR Signaling Pathway	0.523		0.0118	NFKB2
Regulation Of The Epithelial Mesenchymal Transition In Development Pathway	0.527		0.0119	NFKB2
TR/RXR Activation	0.527		0.0119	BCL3
VEGF Family Ligand-Receptor Interactions	0.527		0.0119	RRAS
Prolactin Signaling	0.541		0.0123	RRAS
Chemokine Signaling	0.545		0.0125	RRAS
FLT3 Signaling in Hematopoietic Progenitor Cells	0.545		0.0125	RRAS
IL-17 Signaling	0.545		0.0125	RRAS
Role of BRCA1 in DNA Damage Response	0.545		0.0125	CDKN1A
Role of MAPK Signaling in the Pathogenesis of Influenza	0.545		0.0125	RRAS
IL-3 Signaling	0.55		0.0127	RRAS
Thyroid Cancer Signaling	0.55		0.0127	RRAS
Heparan Sulfate Biosynthesis	0.554		0.0128	AARS1
GDNF Family Ligand-Receptor Interactions	0.564		0.0132	RRAS
Neurotrophin/TRK Signaling	0.564		0.0132	RRAS
FcγRIIB Signaling in B Lymphocytes	0.569		0.0133	RRAS
Caveolar-mediated Endocytosis Signaling	0.579		0.0137	FLNA
Non-Small Cell Lung Cancer Signaling	0.579		0.0137	RRAS
T Helper Cell Differentiation	0.579		0.0137	IFNGR1
Heparan Sulfate Biosynthesis (Late Stages)	0.589		0.0141	AARS1
GM-CSF Signaling	0.595		0.0143	RRAS
Role of JAK1 and JAK3 in γc Cytokine Signaling	0.6		0.0145	RRAS
SPINK1 General Cancer Pathway	0.6		0.0145	RRAS
ErbB4 Signaling	0.611		0.0149	RRAS
Mitotic Roles of Polo-Like Kinase	0.617		0.0152	PPP2R1A
Pyridoxal 5'-phosphate Salvage Pathway	0.617		0.0152	PAK3
ErbB2-ErbB3 Signaling	0.622		0.0154	RRAS
Regulation of Cellular Mechanics by Calpain Protease	0.622		0.0154	RRAS
Thrombopoietin Signaling	0.634		0.0159	RRAS
Wnt/Ca+ pathway	0.64		0.0161	NFKB2
IL-2 Signaling	0.647		0.0164	RRAS
AMPK Signaling	0.648		0.00935	CDKN1A,PPP2R1A
Role of NFAT in Cardiac Hypertrophy	0.648		0.00935	RRAS,TGFB2
Maturity Onset Diabetes of Young (MODY) Signaling	0.659		0.0169	NFKB2
Cancer Drug Resistance By Drug Efflux	0.666		0.0172	RRAS
CNTF Signaling	0.673		0.0175	RRAS
Superpathway of Inositol Phosphate Compounds	0.694		0.0101	INPPL1,PPP1R14B
UVC-Induced MAPK Signaling	0.716		0.0196	RRAS
Myc Mediated Apoptosis Signaling	0.723		0.02	NFKB2
Synaptic Long Term Depression	0.728		0.0106	PPP2R1A,RRAS
Endothelin-1 Signaling	0.732		0.0106	CASP4,RRAS
Triacylglycerol Degradation	0.748		0.0213	AARS1
PFKFB4 Signaling Pathway	0.756		0.0217	TGFB2
Ephrin Receptor Signaling	0.761		0.0111	PAK3,RRAS
Apelin Pancreas Signaling Pathway	0.774		0.0227	NFKB2
T Cell Exhaustion Signaling Pathway	0.78		0.0114	PPP2R1A,RRAS
Oncostatin M Signaling	0.783		0.0233	RRAS
Wnt/β-catenin Signaling	0.787		0.0116	PPP2R1A,TGFB2
Role of IL-17F in Allergic Inflammatory Airway Diseases	0.792		0.0238	NFKB2
Th1 and Th2 Activation Pathway	0.795		0.0117	ICAM1,IFNGR1
Antigen Presentation Pathway	0.822		0.0256	TAPBP
Antiproliferative Role of TOB in T Cell Signaling	0.822		0.0256	TGFB2
Dopamine-DARPP32 Feedback in cAMP Signaling	0.828		0.0123	PPP1R14B,PPP2R1A
Cardiac Hypertrophy Signaling (Enhanced)	0.833		0.00821	LTB,NFKB2,RRAS,TGFB2
Axonal Guidance Signaling	0.84		0.00826	MYL12A,MYL12B,PAK3,RRAS
Cell Cycle Regulation by BTG Family Proteins	0.843		0.027	PPP2R1A
Complement System	0.843		0.027	C3
Interferon Signaling	0.854		0.0278	IFNGR1
Regulation of eIF4 and p70S6K Signaling	0.854		0.0127	PPP2R1A,RRAS
3-phosphoinositide Degradation	0.858		0.0128	INPPL1,PPP1R14B
Inhibition of Angiogenesis by TSP1	0.877		0.0294	CD47
Endocannabinoid Cancer Inhibition Pathway	0.919		0.014	CASP4,CDKN1A
Xenobiotic Metabolism Signaling	0.925		0.0105	NFKB2,PPP2R1A,RRAS
Cardiac β-adrenergic Signaling	0.929		0.0142	PPP1R14B,PPP2R1A
Cellular Effects of Sildenafil (Viagra)	0.982		0.0153	MYL12A,MYL12B
Estrogen-mediated S-phase Entry	0.986		0.0385	CDKN1A
Lipid Antigen Presentation by CD1	0.986		0.0385	ARF6
Synaptic Long Term Potentiation	0.993		0.0155	PPP1R14B,RRAS
IL-17A Signaling in Gastric Cells	1		0.04	CCL20
P2Y Purigenic Receptor Signaling Pathway	1		0.0157	NFKB2,RRAS
CCR3 Signaling in Eosinophils	1.02		0.0161	PAK3,RRAS
RhoA Signaling	1.03		0.0163	MYL12A,MYL12B
Apelin Cardiac Fibroblast Signaling Pathway	1.04		0.0435	TGFB2
Superpathway of D-myo-inositol (1,4,5)-trisphosphate Metabolism	1.04		0.0435	INPPL1
LXR/RXR Activation	1.04		0.0165	C3,NFKB2
Th1 Pathway	1.04		0.0165	ICAM1,IFNGR1
Cholecystokinin/Gastrin-mediated Signaling	1.05		0.0168	RHOB,RRAS
Fc Epsilon RI Signaling	1.06		0.0171	INPPL1,RRAS
Sphingosine-1-phosphate Signaling	1.06		0.0171	CASP4,RHOB
Opioid Signaling Pathway	1.07		0.0121	NFKB2,NFKBIA,RRAS
Neuroprotective Role of THOP1 in Alzheimer's Disease	1.07		0.0172	HTRA2,ST14
NGF Signaling	1.08		0.0175	NFKB2,RRAS
Inflammasome pathway	1.09		0.05	NFKB2
HGF Signaling	1.1		0.018	CDKN1A,RRAS
Glioma Signaling	1.11		0.0182	CDKN1A,RRAS
DNA damage-induced 14-3-3σ Signaling	1.12		0.0526	SFN
Virus Entry via Endocytic Pathways	1.13		0.0187	FLNA,RRAS
PD-1, PD-L1 cancer immunotherapy pathway	1.14		0.0189	IFNGR1,TGFB2
1D-myo-inositol Hexakisphosphate Biosynthesis II (Mammalian)	1.14		0.0556	INPPL1
D-myo-inositol (1,3,4)-trisphosphate Biosynthesis	1.14		0.0556	INPPL1
D-myo-inositol (1,4,5)-trisphosphate Degradation	1.16		0.0588	INPPL1
Role of Osteoblasts, Osteoclasts and Chondrocytes in Rheumatoid Arthritis	1.19		0.0136	BIRC3,NFKBIA,NFKBIE
Apelin Cardiomyocyte Signaling Pathway	1.19		0.0202	MYL12A,MYL12B
VEGF Signaling	1.19		0.0202	RRAS,SFN
Salvage Pathways of Pyrimidine Ribonucleotides	1.2		0.0204	APOBEC3B,PAK3
Bladder Cancer Signaling	1.21		0.0206	CDKN1A,RRAS
FAK Signaling	1.22		0.0211	PAK3,RRAS
ErbB Signaling	1.23		0.0213	PAK3,RRAS
Th17 Activation Pathway	1.25		0.022	CCL20,NFKB2
HIF1α Signaling	1.26		0.0146	CDKN1A,RRAS,TGFB2
Acute Myeloid Leukemia Signaling	1.27		0.0225	NFKB2,RRAS
Crosstalk between Dendritic Cells and Natural Killer Cells	1.27		0.0225	LTB,NFKB2
Role of IL-17A in Psoriasis	1.28		0.0769	CCL20
Systemic Lupus Erythematosus In T Cell Signaling Pathway	1.29	0	0.012	CASP4,PPP2R1A,RHOB,RRAS
PDGF Signaling	1.3		0.0233	INPPL1,RRAS
Adrenomedullin signaling pathway	1.3		0.0152	C3,NFKB2,RRAS
Natural Killer Cell Signaling	1.3		0.0152	NFKB2,PAK3,RRAS
BMP signaling pathway	1.31		0.0235	NFKB2,RRAS
IL-4 Signaling	1.31		0.0235	INPPL1,RRAS
HER-2 Signaling in Breast Cancer	1.32		0.0238	CDKN1A,RRAS
Regulation of the Epithelial-Mesenchymal Transition Pathway	1.33		0.0156	NFKB2,RRAS,TGFB2
Renal Cell Carcinoma Signaling	1.35		0.025	PAK3,RRAS
Agrin Interactions at Neuromuscular Junction	1.37		0.0256	PAK3,RRAS
VDR/RXR Activation	1.37		0.0256	CDKN1A,TGFB2
Antiproliferative Role of Somatostatin Receptor 2	1.38		0.026	CDKN1A,RRAS
Dopamine Receptor Signaling	1.38		0.026	PPP1R14B,PPP2R1A
Macropinocytosis Signaling	1.39		0.0263	ARF6,RRAS
Toll-like Receptor Signaling	1.39		0.0263	NFKB2,NFKBIA
IL-15 Signaling	1.4		0.0267	NFKB2,RRAS
TREM1 Signaling	1.4		0.0267	ICAM1,NFKB2
Estrogen-Dependent Breast Cancer Signaling	1.42		0.027	NFKB2,RRAS
Glioma Invasiveness Signaling	1.42		0.027	RHOB,RRAS
Hypoxia Signaling in the Cardiovascular System	1.42		0.027	NFKBIA,NFKBIE
Actin Nucleation by ARP-WASP Complex	1.44		0.0278	RHOB,RRAS
GNRH Signaling	1.44		0.0173	NFKB2,PAK3,RRAS
Cdc42 Signaling	1.48		0.018	MYL12A,MYL12B,PAK3
Salvage Pathways of Pyrimidine Deoxyribonucleotides	1.48		0.125	APOBEC3B
Remodeling of Epithelial Adherens Junctions	1.48		0.0294	ARF6,CTNNA1
Cell Cycle: G1/S Checkpoint Regulation	1.49		0.0299	CDKN1A,TGFB2
Glioblastoma Multiforme Signaling	1.5		0.0182	CDKN1A,RHOB,RRAS
Tec Kinase Signaling	1.5		0.0183	NFKB2,PAK3,RHOB
Necroptosis Signaling Pathway	1.55		0.0191	BIRC3,FKBP1A,TNIP1
G-Protein Coupled Receptor Signaling	1.56		0.0147	NFKB2,NFKBIA,NFKBIE,RRAS
Endometrial Cancer Signaling	1.58		0.0333	CTNNA1,RRAS
Semaphorin Signaling in Neurons	1.58		0.0333	PAK3,RHOB
Epithelial Adherens Junction Signaling	1.59		0.0197	CTNNA1,RRAS,TGFB2
Coronavirus Pathogenesis Pathway	1.6		0.02	NFKB2,NFKBIA,NFKBIE
Relaxin Signaling	1.6		0.02	NFKB2,NFKBIA,NFKBIE
Role of CHK Proteins in Cell Cycle Checkpoint Control	1.62		0.0351	CDKN1A,PPP2R1A
Aryl Hydrocarbon Receptor Signaling	1.65		0.021	CDKN1A,NFKB2,TGFB2
Type II Diabetes Mellitus Signaling	1.66		0.0211	NFKB2,NFKBIA,NFKBIE
Insulin Receptor Signaling	1.68		0.0214	INPPL1,PPP1R14B,RRAS
STAT3 Pathway	1.72		0.0222	CDKN1A,RRAS,TGFB2
Melanoma Signaling	1.73		0.04	CDKN1A,RRAS
IL-12 Signaling and Production in Macrophages	1.75		0.0227	IFNGR1,NFKB2,TGFB2
14-3-3-mediated Signaling	1.79		0.0236	RRAS,SFN,YWHAH
IL-23 Signaling Pathway	1.84		0.0455	NFKB2,NFKBIA
CD28 Signaling in T Helper Cells	1.86		0.025	NFKB2,NFKBIA,NFKBIE
Airway Pathology in Chronic Obstructive Pulmonary Disease	1.87		0.0254	CCL20,LTB,TGFB2
Renin-Angiotensin Signaling	1.87		0.0254	NFKB2,PAK3,RRAS
Estrogen Receptor Signaling	1.91	1.34164	0.0152	CDKN1A,MYL12A,MYL12B,NFKB2,RRAS
Breast Cancer Regulation by Stathmin1	1.92		0.0118	ADGRE5,ADGRV1,NFKB2,PPP1R14B,PPP2R1A,RRAS,TGFB2
Osteoarthritis Pathway	1.92		0.019	ANXA2,CASP4,CTNNA1,NFKB2
mTOR Signaling	1.93	1	0.019	FKBP1A,PPP2R1A,RHOB,RRAS
Rac Signaling	1.94		0.0268	NFKB2,PAK3,RRAS
tRNA Charging	1.94		0.0513	AARS1,VARS1
iCOS-iCOSL Signaling in T Helper Cells	1.95		0.027	NFKB2,NFKBIA,NFKBIE
Antioxidant Action of Vitamin C	1.97		0.0275	NFKB2,NFKBIA,NFKBIE
Pancreatic Adenocarcinoma Signaling	1.97		0.0275	CDKN1A,NFKB2,TGFB2
CDK5 Signaling	1.98		0.0278	PPP1R14B,PPP2R1A,RRAS
Paxillin Signaling	1.98		0.0278	ARF6,PAK3,RRAS
Telomerase Signaling	1.99		0.028	CDKN1A,PPP2R1A,RRAS
T Cell Receptor Signaling	2.01		0.0286	NFKB2,NFKBIA,RRAS
IGF-1 Signaling	2.02		0.0288	RRAS,SFN,YWHAH
Sumoylation Pathway	2.03		0.0291	NFKB2,NFKBIA,RHOB
RAR Activation	2.05		0.0206	NFKB2,RELB,TGFB2,TNIP1
IL-9 Signaling	2.08		0.0606	BCL3,NFKB2
Regulation Of The Epithelial Mesenchymal Transition By Growth Factors Pathway	2.1	2	0.0213	LTB,NFKB2,RRAS,TGFB2
TGF-β Signaling	2.12		0.0312	PMEPA1,RRAS,TGFB2
Sertoli Cell-Sertoli Cell Junction Signaling	2.12		0.0216	CLDN4,CTNNA1,F11R,RRAS
Role of NFAT in Regulation of the Immune Response	2.15		0.0221	NFKB2,NFKBIA,NFKBIE,RRAS
IL-1 Signaling	2.18		0.033	NFKB2,NFKBIA,NFKBIE
Altered T Cell and B Cell Signaling in Rheumatoid Arthritis	2.19		0.0333	LTB,NFKB2,RELB
OX40 Signaling Pathway	2.19		0.0333	NFKB2,NFKBIA,NFKBIE
Ceramide Signaling	2.22		0.0341	NFKB2,PPP2R1A,RRAS
Cyclins and Cell Cycle Regulation	2.32		0.037	CDKN1A,PPP2R1A,TGFB2
JAK/Stat Signaling	2.34		0.0375	CDKN1A,NFKB2,RRAS
HOTAIR Regulatory Pathway	2.34	0	0.025	CDKN1A,ICAM1,NFKB2,NFKBIA
Phospholipase C Signaling	2.35	2.23607	0.0195	MYL12A,MYL12B,NFKB2,RHOB,RRAS
Role of JAK1, JAK2 and TYK2 in Interferon Signaling	2.35		0.0833	IFNGR1,NFKB2
Tumoricidal Function of Hepatic Natural Killer Cells	2.35		0.0833	ICAM1,SERPINB9
Gαq Signaling	2.36		0.0253	NFKB2,NFKBIA,NFKBIE,RHOB
Colorectal Cancer Metastasis Signaling	2.38	2	0.0198	IFNGR1,NFKB2,RHOB,RRAS,TGFB2
PKCθ Signaling in T Lymphocytes	2.39	2	0.0258	NFKB2,NFKBIA,NFKBIE,RRAS
Role of Pattern Recognition Receptors in Recognition of Bacteria and Viruses	2.4		0.026	C3,LTB,NFKB2,TGFB2
Signaling by Rho Family GTPases	2.44	2.23607	0.0205	MYL12A,MYL12B,NFKB2,PAK3,RHOB
ERK5 Signaling	2.47		0.0417	RRAS,SFN,YWHAH
Cardiac Hypertrophy Signaling	2.47	2.23607	0.0208	MYL12A,MYL12B,RHOB,RRAS,TGFB2
Small Cell Lung Cancer Signaling	2.48		0.0423	NFKB2,NFKBIA,NFKBIE
IL-10 Signaling	2.52		0.0435	NFKB2,NFKBIA,NFKBIE
Hereditary Breast Cancer Signaling	2.55		0.0286	CDKN1A,GADD45B,RRAS,SFN
GADD45 Signaling	2.55		0.105	CDKN1A,GADD45B
Role of PI3K/AKT Signaling in the Pathogenesis of Influenza	2.61		0.0469	NFKB2,NFKBIA,NFKBIE
Activation of IRF by Cytosolic Pattern Recognition Receptors	2.63		0.0476	NFKB2,NFKBIA,NFKBIE
Semaphorin Neuronal Repulsive Signaling Pathway	2.66	1	0.0308	MYL12A,MYL12B,PAK3,RRAS
p70S6K Signaling	2.67		0.031	PPP2R1A,RRAS,SFN,YWHAH
Atherosclerosis Signaling	2.7		0.0315	ICAM1,NFKB2,TNFRSF12A,VCAM1
Role of Macrophages, Fibroblasts and Endothelial Cells in Rheumatoid Arthritis	2.7		0.0192	ICAM1,LTB,NFKBIA,NFKBIE,RRAS,VCAM1
IL-6 Signaling	2.72	2	0.032	NFKB2,NFKBIA,NFKBIE,RRAS
Thrombin Signaling	2.74		0.024	MYL12A,MYL12B,NFKB2,RHOB,RRAS
Neuroinflammation Signaling Pathway	2.79	2.44949	0.0201	BIRC3,ICAM1,IFNGR1,NFKB2,TGFB2,VCAM1
Role of PKR in Interferon Induction and Antiviral Response	2.83	0	0.0342	IFNGR1,NFKB2,NFKBIA,NFKBIE
fMLP Signaling in Neutrophils	2.84	0	0.0345	NFKB2,NFKBIA,NFKBIE,RRAS
Leukocyte Extravasation Signaling	2.84	2	0.0254	CLDN4,CTNNA1,F11R,ICAM1,VCAM1
CD27 Signaling in Lymphocytes	2.85		0.0566	NFKB2,NFKBIA,NFKBIE
Apelin Endothelial Signaling Pathway	2.86	2	0.0348	ICAM1,NFKB2,RRAS,VCAM1
Agranulocyte Adhesion and Diapedesis	2.88		0.0259	CCL20,CLDN4,CXCL16,ICAM1,VCAM1
ERK/MAPK Signaling	2.88	0	0.0259	PAK3,PPP1R14B,PPP2R1A,RRAS,YWHAH
ILK Signaling	2.91	0.447214	0.0263	FLNA,NFKB2,PPP1R14B,PPP2R1A,RHOB
Type I Diabetes Mellitus Signaling	2.91	2	0.036	IFNGR1,NFKB2,NFKBIA,NFKBIE
Cell Cycle: G2/M DNA Damage Checkpoint Regulation	2.95		0.0612	CDKN1A,SFN,YWHAH
Hepatic Fibrosis / Hepatic Stellate Cell Activation	2.95		0.0269	ICAM1,IFNGR1,NFKB2,TGFB2,VCAM1
B Cell Receptor Signaling	2.97	1.34164	0.027	INPPL1,NFKB2,NFKBIA,NFKBIE,RRAS
Hepatic Cholestasis	2.97		0.027	LTB,NFKB2,NFKBIA,NFKBIE,TGFB2
Systemic Lupus Erythematosus In B Cell Signaling Pathway	2.98	1.63299	0.0218	IFNGR1,INPPL1,LTB,NFKB2,RRAS,TGFB2
Granulocyte Adhesion and Diapedesis	3.02		0.0278	CCL20,CLDN4,CXCL16,ICAM1,VCAM1
RhoGDI Signaling	3.02	-2.23607	0.0278	MYL12A,MYL12B,PAK3,RHOB,WASF2
PPAR Signaling	3.02	-2	0.0385	NFKB2,NFKBIA,NFKBIE,RRAS
FAT10 Cancer Signaling Pathway	3.03		0.0652	NFKB2,NFKBIA,TGFB2
Acute Phase Response Signaling	3.03	1.34164	0.0279	C3,NFKB2,NFKBIA,NFKBIE,RRAS
Chronic Myeloid Leukemia Signaling	3.04		0.0388	CDKN1A,NFKB2,RRAS,TGFB2
Role of RIG1-like Receptors in Antiviral Innate Immunity	3.08		0.0682	NFKB2,NFKBIA,NFKBIE
BAG2 Signaling Pathway	3.11		0.0698	ANXA2,CDKN1A,NFKB2
p53 Signaling	3.12		0.0408	CDKN1A,GADD45B,SFN,TP53INP1
Germ Cell-Sertoli Cell Junction Signaling	3.12		0.0292	CTNNA1,PAK3,RHOB,RRAS,TGFB2
ATM Signaling	3.13		0.0412	CDKN1A,GADD45B,NFKBIA,PPP2R1A
PAK Signaling	3.13	2	0.0412	MYL12A,MYL12B,PAK3,RRAS
MIF Regulation of Innate Immunity	3.14		0.0714	NFKB2,NFKBIA,NFKBIE
CXCR4 Signaling	3.16	2.23607	0.0299	MYL12A,MYL12B,PAK3,RHOB,RRAS
B Cell Activating Factor Signaling	3.17		0.0732	NFKB2,NFKBIA,NFKBIE
Regulation of Actin-based Motility by Rho	3.18	2	0.0426	MYL12A,MYL12B,PAK3,RHOB
April Mediated Signaling	3.24		0.0769	NFKB2,NFKBIA,NFKBIE
RANK Signaling in Osteoclasts	3.29		0.0455	BIRC3,NFKB2,NFKBIA,NFKBIE
HIPPO signaling	3.35		0.0471	PPP1R14B,PPP2R1A,SFN,YWHAH
IL-17A Signaling in Fibroblasts	3.38		0.0857	NFKB2,NFKBIA,NFKBIE
LPS-stimulated MAPK Signaling	3.41	2	0.0488	NFKB2,NFKBIA,NFKBIE,RRAS
NF-κB Activation by Viruses	3.41	2	0.0488	NFKB2,NFKBIA,NFKBIE,RRAS
MIF-mediated Glucocorticoid Regulation	3.41		0.0882	NFKB2,NFKBIA,NFKBIE
BEX2 Signaling Pathway	3.47	-1	0.0506	CDKN1A,NFKB2,NFKBIA,PPP2R1A
4-1BB Signaling in T Lymphocytes	3.49		0.0938	NFKB2,NFKBIA,NFKBIE
Actin Cytoskeleton Signaling	3.51	2.23607	0.0275	FLNA,MYL12A,MYL12B,PAK3,RRAS,WASF2
Erythropoietin Signaling	3.54		0.0526	NFKB2,NFKBIA,NFKBIE,RRAS
PI3K Signaling in B Lymphocytes	3.54	2.23607	0.0362	C3,NFKB2,NFKBIA,NFKBIE,RRAS
Integrin Signaling	3.56	1.63299	0.0282	ARF6,MYL12A,MYL12B,PAK3,RHOB,RRAS
IL-8 Signaling	3.71	2.44949	0.03	ICAM1,LASP1,MYL12B,RHOB,RRAS,VCAM1
PTEN Signaling	3.73	-0.447214	0.0397	CDKN1A,INPPL1,NFKB2,RRAS,YWHAH
Inhibition of ARE-Mediated mRNA Degradation Pathway	3.79	0.447214	0.041	LTB,PPP2R1A,SFN,YWHAH,ZFP36L1
CD40 Signaling	3.8	0	0.0615	ICAM1,NFKB2,NFKBIA,NFKBIE
Senescence Pathway	3.81	1.88982	0.0255	CDKN1A,GADD45B,NFKB2,PPP2R1A,RRAS,TGFB2,ZFP36L1
IL-17A Signaling in Airway Cells	3.82		0.0625	CCL20,NFKB2,NFKBIA,NFKBIE
PPARα/RXRα Activation	3.83	-1	0.0316	BCL3,NFKB2,NFKBIA,NFKBIE,RRAS,TGFB2
Dendritic Cell Maturation	3.92	2.44949	0.0328	ICAM1,LTB,NFKB2,NFKBIA,NFKBIE,RELB
NF-κB Signaling	3.97	0	0.0335	NFKB2,NFKBIA,NFKBIE,RELB,RRAS,TNIP1
Glucocorticoid Receptor Signaling	4.08		0.0238	CDKN1A,ICAM1,NFKBIA,NFKBIE,RRAS,TGFB2,VCAM1,YWHAH
Role of IL-17A in Arthritis	4.11		0.0741	CCL20,NFKB2,NFKBIA,NFKBIE
Tight Junction Signaling	4.12		0.0357	CLDN4,CTNNA1,F11R,NFKB2,PPP2R1A,TGFB2
Prostate Cancer Signaling	4.4		0.0549	CDKN1A,NFKB2,NFKBIA,NFKBIE,RRAS
iNOS Signaling	4.43	2	0.0889	IFNGR1,NFKB2,NFKBIA,NFKBIE
Regulation of IL-2 Expression in Activated and Anergic T Lymphocytes	4.44		0.0562	NFKB2,NFKBIA,NFKBIE,RRAS,TGFB2
PEDF Signaling	4.62		0.061	NFKB2,NFKBIA,NFKBIE,RRAS,WASF2
Gα12/13 Signaling	4.75	2	0.0462	MYL12A,MYL12B,NFKB2,NFKBIA,NFKBIE,RRAS
Production of Nitric Oxide and Reactive Oxygen Species in Macrophages	4.85	1.13389	0.0372	IFNGR1,NFKB2,NFKBIA,NFKBIE,PPP1R14B,PPP2R1A,RHOB
TNFR2 Signaling	5.14	1	0.133	BIRC3,NFKB2,NFKBIA,NFKBIE
Induction of Apoptosis by HIV1	5.25	-0.447214	0.082	BIRC3,HTRA2,NFKB2,NFKBIA,NFKBIE
Molecular Mechanisms of Cancer	5.26		0.0256	BIRC3,CDKN1A,CTNNA1,NFKB2,NFKBIA,NFKBIE,PAK3,RHOB,RRAS,TGFB2
Hepatic Fibrosis Signaling Pathway	5.49	1.89737	0.0272	ICAM1,MYL12A,MYL12B,NFKB2,NFKBIA,NFKBIE,RHOB,RRAS,TGFB2,VCAM1
Lymphotoxin β Receptor Signaling	5.55		0.0943	LTB,NFKB2,NFKBIA,RELB,VCAM1
Death Receptor Signaling	5.64	0	0.0659	BIRC3,HTRA2,LMNA,NFKB2,NFKBIA,NFKBIE
TNFR1 Signaling	5.68	1.34164	0.1	BIRC3,NFKB2,NFKBIA,NFKBIE,PAK3
Protein Kinase A Signaling	6.05	-0.377964	0.0276	FLNA,MYL12A,MYL12B,NFKB2,NFKBIA,NFKBIE,PPP1R14B,PTP4A1,SFN,TGFB2,YWHAH
Angiopoietin Signaling	6.14	0	0.08	NFKB2,NFKBIA,NFKBIE,PAK3,RRAS,TNIP1
HMGB1 Signaling	6.34	2.64575	0.0485	ICAM1,IFNGR1,LTB,NFKB2,RHOB,RRAS,TGFB2,VCAM1
TWEAK Signaling	6.47	-0.447214	0.143	BIRC3,NFKB2,NFKBIA,NFKBIE,TNFRSF12A
Apoptosis Signaling	6.71	0.377964	0.0707	BIRC3,HTRA2,LMNA,NFKB2,NFKBIA,NFKBIE,RRAS
PI3K/AKT Signaling	7.29	0.333333	0.0514	CDKN1A,INPPL1,NFKB2,NFKBIA,NFKBIE,PPP2R1A,RRAS,SFN,YWHAH

## Sheet: M30_C2vC4
© 2000-2020 QIAGEN. All rights reserved.
Ingenuity Canonical Pathways	-log(p-value)	zScore	Ratio	Molecules
Cardiac Hypertrophy Signaling (Enhanced)	0.211		0.00205	PIK3C2A
Protein Kinase A Signaling	0.266		0.00251	TCF7L2
Molecular Mechanisms of Cancer	0.272		0.00256	PIK3C2A
Glucocorticoid Receptor Signaling	0.318		0.00298	PIK3C2A
Systemic Lupus Erythematosus In T Cell Signaling Pathway	0.32		0.00299	PIK3C2A
Estrogen Receptor Signaling	0.325		0.00305	PIK3C2A
Neuroinflammation Signaling Pathway	0.355		0.00334	PIK3C2A
Systemic Lupus Erythematosus In B Cell Signaling Pathway	0.382		0.00364	PIK3C2A
G-Protein Coupled Receptor Signaling	0.386		0.00368	PIK3C2A
Signaling by Rho Family GTPases	0.422		0.0041	PIK3C2A
Insulin Secretion Signaling Pathway	0.424		0.00412	PIK3C2A
Cardiac Hypertrophy Signaling	0.428		0.00417	PIK3C2A
Huntington's Disease Signaling	0.432		0.00422	PIK3C2A
Systemic Lupus Erythematosus Signaling	0.444		0.00437	PIK3C2A
EIF2 Signaling	0.452		0.00446	PIK3C2A
Actin Cytoskeleton Signaling	0.461		0.00459	PIK3C2A
Role of NFAT in Cardiac Hypertrophy	0.468		0.00467	PIK3C2A
Integrin Signaling	0.469		0.00469	PIK3C2A
Osteoarthritis Pathway	0.473		0.00474	TCF7L2
mTOR Signaling	0.474		0.00476	PIK3C2A
Thrombin Signaling	0.478		0.00481	PIK3C2A
CREB Signaling in Neurons	0.479		0.00483	PIK3C2A
HIF1α Signaling	0.483		0.00488	PIK3C2A
Superpathway of Inositol Phosphate Compounds	0.493		0.00503	PIK3C2A
Gap Junction Signaling	0.495		0.00505	PIK3C2A
Adrenomedullin signaling pathway	0.497		0.00508	PIK3C2A
Leukocyte Extravasation Signaling	0.497		0.00508	PIK3C2A
Natural Killer Cell Signaling	0.497		0.00508	PIK3C2A
Breast Cancer Regulation by Stathmin1	0.498		0.00338	ADGRL3,PIK3C2A
Clathrin-mediated Endocytosis Signaling	0.504		0.00518	PIK3C2A
ERK/MAPK Signaling	0.504		0.00518	PIK3C2A
ILK Signaling	0.51		0.00526	PIK3C2A
PPARα/RXRα Activation	0.51		0.00526	FASN
Xenobiotic Metabolism CAR Signaling Pathway	0.512		0.00529	GSTM2
Endothelin-1 Signaling	0.514		0.00532	PIK3C2A
Regulation Of The Epithelial Mesenchymal Transition By Growth Factors Pathway	0.514		0.00532	PIK3C2A
B Cell Receptor Signaling	0.52		0.00541	PIK3C2A
Hepatic Cholestasis	0.52		0.00541	NR5A2
Dendritic Cell Maturation	0.524		0.00546	PIK3C2A
Role of NFAT in Regulation of the Immune Response	0.528		0.00552	PIK3C2A
Ephrin Receptor Signaling	0.53		0.00556	EPHA7
NF-κB Signaling	0.532		0.00559	PIK3C2A
T Cell Exhaustion Signaling Pathway	0.54		0.00571	PIK3C2A
Germ Cell-Sertoli Cell Junction Signaling	0.548		0.00585	PIK3C2A
Mitochondrial Dysfunction	0.548		0.00585	CAT
Th1 and Th2 Activation Pathway	0.548		0.00585	PIK3C2A
CXCR4 Signaling	0.557		0.00599	PIK3C2A
3-phosphoinositide Biosynthesis	0.559		0.00602	PIK3C2A
Glioblastoma Multiforme Signaling	0.562		0.00606	PIK3C2A
HMGB1 Signaling	0.562		0.00606	PIK3C2A
Tec Kinase Signaling	0.564		0.0061	PIK3C2A
eNOS Signaling	0.575		0.00629	PIK3C2A
Aldosterone Signaling in Epithelial Cells	0.578		0.00633	PIK3C2A
Gαq Signaling	0.578		0.00633	PIK3C2A
Regulation of eIF4 and p70S6K Signaling	0.58		0.00637	PIK3C2A
PKCθ Signaling in T Lymphocytes	0.585		0.00645	PIK3C2A
Role of Pattern Recognition Receptors in Recognition of Bacteria and Viruses	0.587		0.00649	PIK3C2A
Epithelial Adherens Junction Signaling	0.592		0.00658	TCF7L2
Factors Promoting Cardiogenesis in Vertebrates	0.597		0.00667	TCF7L2
Relaxin Signaling	0.597		0.00667	PIK3C2A
Aryl Hydrocarbon Receptor Signaling	0.615		0.00699	GSTM2
Type II Diabetes Mellitus Signaling	0.618		0.00704	PIK3C2A
Hereditary Breast Cancer Signaling	0.623		0.00714	PIK3C2A
Insulin Receptor Signaling	0.623		0.00714	PIK3C2A
Th2 Pathway	0.634		0.00735	PIK3C2A
IL-12 Signaling and Production in Macrophages	0.646		0.00758	PIK3C2A
Gα12/13 Signaling	0.651		0.00769	PIK3C2A
Reelin Signaling in Neurons	0.654		0.00775	PIK3C2A
p70S6K Signaling	0.654		0.00775	PIK3C2A
14-3-3-mediated Signaling	0.66		0.00787	PIK3C2A
P2Y Purigenic Receptor Signaling Pathway	0.66		0.00787	PIK3C2A
IL-6 Signaling	0.666		0.008	PIK3C2A
Phagosome Formation	0.666		0.008	PIK3C2A
CCR3 Signaling in Eosinophils	0.67		0.00806	PIK3C2A
LXR/RXR Activation	0.679		0.00826	FASN
Th1 Pathway	0.679		0.00826	PIK3C2A
CD28 Signaling in T Helper Cells	0.682		0.00833	PIK3C2A
GP6 Signaling Pathway	0.685		0.0084	PIK3C2A
Role of NANOG in Mammalian Embryonic Stem Cell Pluripotency	0.685		0.0084	PIK3C2A
Renin-Angiotensin Signaling	0.689		0.00847	PIK3C2A
Fc Epsilon RI Signaling	0.692		0.00855	PIK3C2A
Role of Tissue Factor in Cancer	0.692		0.00855	PIK3C2A
Sphingosine-1-phosphate Signaling	0.692		0.00855	PIK3C2A
Neuroprotective Role of THOP1 in Alzheimer's Disease	0.695		0.00862	PRSS3
fMLP Signaling in Neutrophils	0.695		0.00862	PIK3C2A
Apelin Endothelial Signaling Pathway	0.699		0.0087	PIK3C2A
Endocannabinoid Developing Neuron Pathway	0.699		0.0087	PIK3C2A
NGF Signaling	0.702		0.00877	PIK3C2A
Rac Signaling	0.709		0.00893	PIK3C2A
HGF Signaling	0.712		0.00901	PIK3C2A
iCOS-iCOSL Signaling in T Helper Cells	0.712		0.00901	PIK3C2A
Glioma Signaling	0.716		0.00909	PIK3C2A
Pancreatic Adenocarcinoma Signaling	0.72		0.00917	PIK3C2A
Paxillin Signaling	0.723		0.00926	PIK3C2A
Telomerase Signaling	0.727		0.00935	PIK3C2A
Virus Entry via Endocytic Pathways	0.727		0.00935	PIK3C2A
PD-1, PD-L1 cancer immunotherapy pathway	0.73		0.00943	PIK3C2A
T Cell Receptor Signaling	0.734		0.00952	PIK3C2A
IGF-1 Signaling	0.738		0.00962	PIK3C2A
Chronic Myeloid Leukemia Signaling	0.742		0.00971	PIK3C2A
SAPK/JNK Signaling	0.746		0.0098	PIK3C2A
Neuropathic Pain Signaling In Dorsal Horn Neurons	0.749		0.0099	PIK3C2A
Nitric Oxide Signaling in the Cardiovascular System	0.757		0.0101	PIK3C2A
VEGF Signaling	0.757		0.0101	PIK3C2A
UVA-Induced MAPK Signaling	0.761		0.0102	PIK3C2A
p53 Signaling	0.761		0.0102	PIK3C2A
PAK Signaling	0.765		0.0103	PIK3C2A
FAK Signaling	0.774		0.0105	PIK3C2A
ErbB Signaling	0.778		0.0106	PIK3C2A
Melanocyte Development and Pigmentation Signaling	0.778		0.0106	PIK3C2A
Prostate Cancer Signaling	0.791		0.011	PIK3C2A
Hepatic Fibrosis Signaling Pathway	0.798		0.00543	PIK3C2A,TCF7L2
CTLA4 Signaling in Cytotoxic T Lymphocytes	0.8		0.0112	PIK3C2A
Ceramide Signaling	0.804		0.0114	PIK3C2A
RANK Signaling in Osteoclasts	0.804		0.0114	PIK3C2A
PDGF Signaling	0.813		0.0116	PIK3C2A
IL-4 Signaling	0.818		0.0118	PIK3C2A
Xenobiotic Metabolism AHR Signaling Pathway	0.818		0.0118	GSTM2
FGF Signaling	0.823		0.0119	PIK3C2A
HER-2 Signaling in Breast Cancer	0.823		0.0119	PIK3C2A
Regulation Of The Epithelial Mesenchymal Transition In Development Pathway	0.823		0.0119	TCF7L2
VEGF Family Ligand-Receptor Interactions	0.823		0.0119	PIK3C2A
LPS-stimulated MAPK Signaling	0.832		0.0122	PIK3C2A
NF-κB Activation by Viruses	0.832		0.0122	PIK3C2A
Prolactin Signaling	0.837		0.0123	PIK3C2A
FLT3 Signaling in Hematopoietic Progenitor Cells	0.842		0.0125	PIK3C2A
IL-17 Signaling	0.842		0.0125	PIK3C2A
JAK/Stat Signaling	0.842		0.0125	PIK3C2A
Renal Cell Carcinoma Signaling	0.842		0.0125	PIK3C2A
BEX2 Signaling Pathway	0.847		0.0127	TCF7L2
IL-3 Signaling	0.847		0.0127	PIK3C2A
Agrin Interactions at Neuromuscular Junction	0.852		0.0128	UTRN
Heparan Sulfate Biosynthesis	0.852		0.0128	DTD2
IL-7 Signaling Pathway	0.852		0.0128	PIK3C2A
Role of Wnt/GSK-3β Signaling in the Pathogenesis of Influenza	0.852		0.0128	TCF7L2
Antiproliferative Role of Somatostatin Receptor 2	0.858		0.013	PIK3C2A
Erythropoietin Signaling	0.863		0.0132	PIK3C2A
GDNF Family Ligand-Receptor Interactions	0.863		0.0132	PIK3C2A
Macropinocytosis Signaling	0.863		0.0132	PIK3C2A
Neurotrophin/TRK Signaling	0.863		0.0132	PIK3C2A
Angiopoietin Signaling	0.868		0.0133	PIK3C2A
FcγRIIB Signaling in B Lymphocytes	0.868		0.0133	PIK3C2A
IL-15 Signaling	0.868		0.0133	PIK3C2A
Estrogen-Dependent Breast Cancer Signaling	0.874		0.0135	PIK3C2A
Glioma Invasiveness Signaling	0.874		0.0135	PIK3C2A
Leptin Signaling in Obesity	0.874		0.0135	PIK3C2A
Non-Small Cell Lung Cancer Signaling	0.879		0.0137	PIK3C2A
Basal Cell Carcinoma Signaling	0.885		0.0139	TCF7L2
Growth Hormone Signaling	0.89		0.0141	PIK3C2A
Heparan Sulfate Biosynthesis (Late Stages)	0.89		0.0141	DTD2
Small Cell Lung Cancer Signaling	0.89		0.0141	PIK3C2A
GM-CSF Signaling	0.896		0.0143	PIK3C2A
Role of JAK1 and JAK3 in γc Cytokine Signaling	0.902		0.0145	PIK3C2A
Synaptogenesis Signaling Pathway	0.913		0.00641	EPHA7,PIK3C2A
ErbB4 Signaling	0.914		0.0149	PIK3C2A
CD40 Signaling	0.926		0.0154	PIK3C2A
ErbB2-ErbB3 Signaling	0.926		0.0154	PIK3C2A
PXR/RXR Activation	0.926		0.0154	GSTM2
IL-17A Signaling in Airway Cells	0.933		0.0156	PIK3C2A
Role of PI3K/AKT Signaling in the Pathogenesis of Influenza	0.933		0.0156	PIK3C2A
Thrombopoietin Signaling	0.939		0.0159	PIK3C2A
IL-2 Signaling	0.952		0.0164	PIK3C2A
Endometrial Cancer Signaling	0.959		0.0167	PIK3C2A
PCP pathway	0.959		0.0167	DAAM1
SPINK1 Pancreatic Cancer Pathway	0.959		0.0167	PRSS3
MSP-RON Signaling Pathway	0.973		0.0172	PIK3C2A
CNTF Signaling	0.98		0.0175	PIK3C2A
EGF Signaling	0.995		0.0182	PIK3C2A
Role of IL-17A in Arthritis	1		0.0185	PIK3C2A
Senescence Pathway	1		0.00727	CAT,PIK3C2A
Lymphotoxin β Receptor Signaling	1.01		0.0189	PIK3C2A
UVB-Induced MAPK Signaling	1.02		0.0192	PIK3C2A
Melanoma Signaling	1.03		0.02	PIK3C2A
Stearate Biosynthesis I (Animals)	1.05		0.0208	FASN
Triacylglycerol Degradation	1.06		0.0213	DTD2
Colorectal Cancer Metastasis Signaling	1.07		0.00791	PIK3C2A,TCF7L2
Role of Oct4 in Mammalian Embryonic Stem Cell Pluripotency	1.07		0.0217	NR5A2
Apelin Pancreas Signaling Pathway	1.09		0.0227	PIK3C2A
IL-23 Signaling Pathway	1.09		0.0227	PIK3C2A
Docosahexaenoic Acid (DHA) Signaling	1.15		0.0263	PIK3C2A
Superpathway of Methionine Degradation	1.16		0.027	MAT2A
Role of Osteoblasts, Osteoclasts and Chondrocytes in Rheumatoid Arthritis	1.17		0.00909	PIK3C2A,TCF7L2
AMPK Signaling	1.19		0.00935	FASN,PIK3C2A
IL-9 Signaling	1.21		0.0303	PIK3C2A
Glutathione-mediated Detoxification	1.22		0.0312	GSTM2
IL-8 Signaling	1.24		0.01	PIK3C2A,RAB11FIP2
Role of p14/p19ARF in Tumor Suppression	1.26		0.0345	PIK3C2A
Superpathway of Cholesterol Biosynthesis	1.26		0.0345	MSMO1
Regulation of the Epithelial-Mesenchymal Transition Pathway	1.27		0.0104	PIK3C2A,TCF7L2
Xenobiotic Metabolism PXR Signaling Pathway	1.27		0.0104	CAT,GSTM2
Production of Nitric Oxide and Reactive Oxygen Species in Macrophages	1.29		0.0106	CAT,PIK3C2A
Cysteine Biosynthesis III (mammalia)	1.34		0.0417	MAT2A
Glutathione Redox Reactions I	1.34		0.0417	GSTM2
Vitamin-C Transport	1.34		0.0417	LRRC8D
Wnt/β-catenin Signaling	1.35		0.0116	NR5A2,TCF7L2
Ethanol Degradation IV	1.36		0.0435	CAT
Methionine Degradation I (to Homocysteine)	1.38		0.0455	MAT2A
HOTAIR Regulatory Pathway	1.42		0.0125	PIK3C2A,TCF7L2
Endocannabinoid Cancer Inhibition Pathway	1.5		0.014	PIK3C2A,TCF7L2
Xenobiotic Metabolism General Signaling Pathway	1.5		0.014	GSTM2,PIK3C2A
Ovarian Cancer Signaling	1.53		0.0144	PIK3C2A,TCF7L2
Human Embryonic Stem Cell Pluripotency	1.55		0.0148	PIK3C2A,TCF7L2
Cholesterol Biosynthesis I	1.6		0.0769	MSMO1
Cholesterol Biosynthesis II (via 24,25-dihydrolanosterol)	1.6		0.0769	MSMO1
Cholesterol Biosynthesis III (via Desmosterol)	1.6		0.0769	MSMO1
FXR/RXR Activation	1.61		0.0159	FASN,NR5A2
Xenobiotic Metabolism Signaling	1.74		0.0105	CAT,GSTM2,PIK3C2A
Mouse Embryonic Stem Cell Pluripotency	1.77		0.0194	PIK3C2A,TCF7L2
Apelin Cardiomyocyte Signaling Pathway	1.8		0.0202	CAT,PIK3C2A
Superoxide Radicals Degradation	1.81		0.125	CAT
Amyotrophic Lateral Sclerosis Signaling	1.82		0.0206	CAT,PIK3C2A
Axonal Guidance Signaling	1.85		0.00826	EPHA7,PIK3C2A,SEMA5A,SEMA6A
Acute Myeloid Leukemia Signaling	1.89		0.0225	PIK3C2A,TCF7L2
Zymosterol Biosynthesis	1.94		0.167	MSMO1
TR/RXR Activation	1.94		0.0238	FASN,PIK3C2A
Apelin Adipocyte Signaling Pathway	1.96		0.0244	CAT,GSTM2
PEDF Signaling	1.96		0.0244	PIK3C2A,TCF7L2
Thyroid Cancer Signaling	1.99		0.0253	PIK3C2A,TCF7L2
LPS/IL-1 Mediated Inhibition of RXR Function	2.03		0.0134	CAT,GSTM2,NR5A2
SPINK1 General Cancer Pathway	2.1		0.029	PIK3C2A,PRSS3
NRF2-mediated Oxidative Stress Response	2.23		0.0159	CAT,GSTM2,PIK3C2A
S-adenosyl-L-methionine Biosynthesis	2.24		0.333	MAT2A
Fatty Acid Biosynthesis Initiation II	2.41		0.5	FASN
Palmitate Biosynthesis I (Animals)	2.41		0.5	FASN
Ephrin A Signaling	2.43		0.0426	EPHA7,PIK3C2A
Role of Macrophages, Fibroblasts and Endothelial Cells in Rheumatoid Arthritis	2.51		0.0128	DAAM1,PIK3C2A,PRSS3,TCF7L2
Semaphorin Neuronal Repulsive Signaling Pathway	2.69		0.0231	PIK3C2A,SEMA5A,SEMA6A

## Sheet: M33_C2vC1
© 2000-2020 QIAGEN. All rights reserved.
Ingenuity Canonical Pathways	-log(p-value)	zScore	Ratio	Molecules
Breast Cancer Regulation by Stathmin1	0		0.00169	CCND1
Cardiac Hypertrophy Signaling (Enhanced)	0.237		0.00205	IGF1R
Senescence Pathway	0.414		0.00364	CCND1
Insulin Secretion Signaling Pathway	0.456		0.00412	CLCN3
Huntington's Disease Signaling	0.465		0.00422	IGF1R
Sperm Motility	0.487		0.00448	IGF1R
Calcium Signaling	0.515		0.00485	RCAN2
Leukocyte Extravasation Signaling	0.531		0.00508	TIMP4
Natural Killer Cell Signaling	0.531		0.00508	COL18A1
Synaptic Long Term Depression	0.547		0.00529	IGF1R
Dendritic Cell Maturation	0.558		0.00546	COL18A1
Role of NFAT in Regulation of the Immune Response	0.563		0.00552	RCAN2
NF-κB Signaling	0.567		0.00559	IGF1R
Coronavirus Pathogenesis Pathway	0.633		0.00667	CCND1
Factors Promoting Cardiogenesis in Vertebrates	0.633		0.00667	CCND1
Aryl Hydrocarbon Receptor Signaling	0.651		0.00699	CCND1
Endocannabinoid Cancer Inhibition Pathway	0.651		0.00699	CCND1
Type II Diabetes Mellitus Signaling	0.654		0.00704	SOCS2
Hereditary Breast Cancer Signaling	0.659		0.00714	CCND1
Ovarian Cancer Signaling	0.662		0.00719	CCND1
Androgen Signaling	0.671		0.00735	CCND1
Semaphorin Neuronal Repulsive Signaling Pathway	0.688		0.00769	PLXNB1
Atherosclerosis Signaling	0.697		0.00787	COL18A1
IL-6 Signaling	0.703		0.008	MCL1
RhoA Signaling	0.71		0.00813	IGF1R
IL-15 Production	0.716		0.00826	IGF1R
GP6 Signaling Pathway	0.722		0.0084	COL18A1
Neuroprotective Role of THOP1 in Alzheimer's Disease	0.732		0.00862	MME
Endocannabinoid Developing Neuron Pathway	0.736		0.0087	CCND1
HGF Signaling	0.75		0.00901	CCND1
Type I Diabetes Mellitus Signaling	0.75		0.00901	SOCS2
Pancreatic Adenocarcinoma Signaling	0.757		0.00917	CCND1
Chronic Myeloid Leukemia Signaling	0.779		0.00971	CCND1
NER Pathway	0.779		0.00971	LIG1
Apoptosis Signaling	0.795		0.0101	MCL1
p53 Signaling	0.799		0.0102	CCND1
Bladder Cancer Signaling	0.803		0.0103	CCND1
Prostate Cancer Signaling	0.829		0.011	CCND1
Acute Myeloid Leukemia Signaling	0.838		0.0112	CCND1
HER-2 Signaling in Breast Cancer	0.861		0.0119	CCND1
TR/RXR Activation	0.861		0.0119	RCAN2
Cyclins and Cell Cycle Regulation	0.876		0.0123	CCND1
Prolactin Signaling	0.876		0.0123	SOCS2
JAK/Stat Signaling	0.881		0.0125	SOCS2
Thyroid Cancer Signaling	0.886		0.0127	CCND1
VDR/RXR Activation	0.891		0.0128	HES1
Non-Small Cell Lung Cancer Signaling	0.918		0.0137	CCND1
Small Cell Lung Cancer Signaling	0.929		0.0141	CCND1
Systemic Lupus Erythematosus In T Cell Signaling Pathway	0.933		0.00599	RHOJ,RHOV
GM-CSF Signaling	0.935		0.0143	CCND1
Cell Cycle: G1/S Checkpoint Regulation	0.953		0.0149	CCND1
ErbB2-ErbB3 Signaling	0.965		0.0154	CCND1
Regulation of Cellular Mechanics by Calpain Protease	0.965		0.0154	CCND1
Role of Macrophages, Fibroblasts and Endothelial Cells in Rheumatoid Arthritis	0.982		0.00641	CCND1,SFRP1
Endometrial Cancer Signaling	0.998		0.0167	CCND1
SPINK1 Pancreatic Cancer Pathway	0.998		0.0167	CLPS
Cell Cycle Control of Chromosomal Replication	1.03		0.0179	LIG1
Melanoma Signaling	1.07		0.02	CCND1
Myc Mediated Apoptosis Signaling	1.07		0.02	MCL1
Systemic Lupus Erythematosus In B Cell Signaling Pathway	1.07		0.00727	CCND1,MCL1
Phospholipase C Signaling	1.12		0.00778	RHOJ,RHOV
Oncostatin M Signaling	1.14		0.0233	OSMR
Intrinsic Prothrombin Activation Pathway	1.15		0.0238	COL18A1
Signaling by Rho Family GTPases	1.16		0.0082	RHOJ,RHOV
Inhibition of Matrix Metalloproteases	1.18		0.0256	TIMP4
Cell Cycle Regulation by BTG Family Proteins	1.2		0.027	CCND1
Notch Signaling	1.2		0.027	HES1
EIF2 Signaling	1.23		0.00893	CCND1,IGF1R
Role of JAK2 in Hormone-like Cytokine Signaling	1.24		0.0294	SOCS2
Role of Osteoblasts, Osteoclasts and Chondrocytes in Rheumatoid Arthritis	1.24		0.00909	ADAMTS5,SFRP1
IL-9 Signaling	1.25		0.0303	SOCS2
AMPK Signaling	1.26		0.00935	CCND1,CFTR
Role of NFAT in Cardiac Hypertrophy	1.26		0.00935	IGF1R,RCAN2
Integrin Signaling	1.27		0.00939	RHOJ,RHOV
Osteoarthritis Pathway	1.27		0.00948	ADAMTS5,HES1
mTOR Signaling	1.28		0.00952	RHOJ,RHOV
Thrombin Signaling	1.29		0.00962	RHOJ,RHOV
Apelin Liver Signaling Pathway	1.35		0.0385	COL18A1
Estrogen-mediated S-phase Entry	1.35		0.0385	CCND1
Production of Nitric Oxide and Reactive Oxygen Species in Macrophages	1.36		0.0106	RHOJ,RHOV
Role of JAK family kinases in IL-6-type Cytokine Signaling	1.37		0.04	OSMR
Hepatic Fibrosis / Hepatic Stellate Cell Activation	1.37		0.0108	COL18A1,IGF1R
RhoGDI Signaling	1.4		0.0111	RHOJ,RHOV
Acute Phase Response Signaling	1.4		0.0112	OSMR,SOCS2
PI3K/AKT Signaling	1.42		0.0114	CCND1,MCL1
Wnt/β-catenin Signaling	1.43		0.0116	CCND1,SFRP1
Germ Cell-Sertoli Cell Junction Signaling	1.44		0.0117	RHOJ,RHOV
CXCR4 Signaling	1.46		0.012	RHOJ,RHOV
HMGB1 Signaling	1.47		0.0121	RHOJ,RHOV
Tec Kinase Signaling	1.47		0.0122	RHOJ,RHOV
GADD45 Signaling	1.48		0.0526	CCND1
Gαq Signaling	1.5		0.0127	RHOJ,RHOV
Molecular Mechanisms of Cancer	1.51		0.00767	CCND1,RHOJ,RHOV
Ubiquinol-10 Biosynthesis (Eukaryotic)	1.53		0.0588	MICAL2
γ-linolenate Biosynthesis II (Animals)	1.53		0.0588	FADS1
Histidine Degradation VI	1.58		0.0667	MICAL2
DNA Double-Strand Break Repair by Homologous Recombination	1.61		0.0714	LIG1
STAT3 Pathway	1.63		0.0148	IGF1R,SOCS2
Oleate Biosynthesis II (Animals)	1.65		0.0769	FADS1
Pregnenolone Biosynthesis	1.65		0.0769	MICAL2
BER pathway	1.68		0.0833	LIG1
PTEN Signaling	1.68		0.0159	CCND1,IGF1R
Phagosome Formation	1.69		0.016	RHOJ,RHOV
Estrogen Receptor Signaling	1.7		0.00915	CCND1,HES1,IGF1R
Cholecystokinin/Gastrin-mediated Signaling	1.73		0.0168	RHOJ,RHOV
Sphingosine-1-phosphate Signaling	1.74		0.0171	RHOJ,RHOV
Glioma Signaling	1.79		0.0182	CCND1,IGF1R
IGF-1 Signaling	1.84		0.0192	IGF1R,SOCS2
Sumoylation Pathway	1.85		0.0194	RHOJ,RHOV
Regulation of Actin-based Motility by Rho	1.92		0.0213	RHOJ,RHOV
Colorectal Cancer Metastasis Signaling	2		0.0119	CCND1,RHOJ,RHOV
Cardiac Hypertrophy Signaling	2.07		0.0125	IGF1R,RHOJ,RHOV
BEX2 Signaling Pathway	2.07		0.0253	CCND1,MAP2
IL-7 Signaling Pathway	2.08		0.0256	CCND1,MCL1
Estrogen-Dependent Breast Cancer Signaling	2.12		0.027	CCND1,IGF1R
Actin Nucleation by ARP-WASP Complex	2.15		0.0278	RHOJ,RHOV
Growth Hormone Signaling	2.16		0.0282	IGF1R,SOCS2
IL-8 Signaling	2.28		0.015	CCND1,RHOJ,RHOV
ILK Signaling	2.34		0.0158	CCND1,RHOJ,RHOV
Hepatic Fibrosis Signaling Pathway	2.41	2	0.0109	CCND1,COL18A1,RHOJ,RHOV
Axonal Guidance Signaling	2.82		0.0103	ADAMTS1,ADAMTS5,ADAMTS9,MME,PLXNB1
Glioma Invasiveness Signaling	3.52		0.0405	RHOJ,RHOV,TIMP4
Glioblastoma Multiforme Signaling	3.7	2	0.0242	CCND1,IGF1R,RHOJ,RHOV
Semaphorin Signaling in Neurons	3.79		0.05	PLXNB1,RHOJ,RHOV

## Sheet: M34_C1vC0
© 2000-2020 QIAGEN. All rights reserved.
Ingenuity Canonical Pathways	-log(p-value)	zScore	Ratio	Molecules
Molecular Mechanisms of Cancer	0.279		0.00256	SMAD3
Glucocorticoid Receptor Signaling	0.325		0.00298	SMAD3
Senescence Pathway	0.39		0.00364	SMAD3
Protein Ubiquitination Pathway	0.392		0.00366	DNAJB13
G-Protein Coupled Receptor Signaling	0.393		0.00368	PDE3B
Signaling by Rho Family GTPases	0.43		0.0041	MYLK
cAMP-mediated signaling	0.454		0.00439	PDE3B
EIF2 Signaling	0.46		0.00446	VEGFA
LPS/IL-1 Mediated Inhibition of RXR Function	0.46		0.00446	LBP
Integrin Signaling	0.477		0.00469	MYLK
Thrombin Signaling	0.486		0.00481	MYLK
Superpathway of Inositol Phosphate Compounds	0.502		0.00503	PPP1R1B
Adrenomedullin signaling pathway	0.505		0.00508	MYLK
Breast Cancer Regulation by Stathmin1	0.511		0.00338	PDGFC,VEGFA
PPARα/RXRα Activation	0.518		0.00526	SMAD3
NRF2-mediated Oxidative Stress Response	0.52		0.00529	DNAJB13
Hepatic Cholestasis	0.528		0.00541	LBP
Acute Phase Response Signaling	0.54		0.00559	LBP
Germ Cell-Sertoli Cell Junction Signaling	0.557		0.00585	LAMC3
Tight Junction Signaling	0.563		0.00595	MYLK
Cdc42 Signaling	0.566		0.00599	MYLK
3-phosphoinositide Biosynthesis	0.568		0.00602	PPP1R1B
Glioblastoma Multiforme Signaling	0.57		0.00606	PDGFC
Dopamine-DARPP32 Feedback in cAMP Signaling	0.575		0.00613	PPP1R1B
Aldosterone Signaling in Epithelial Cells	0.586		0.00633	DNAJB13
D-myo-inositol-5-phosphate Metabolism	0.589		0.00637	PPP1R1B
3-phosphoinositide Degradation	0.591		0.00641	PPP1R1B
Gustation Pathway	0.596		0.00649	PDE3B
Coronavirus Pathogenesis Pathway	0.606		0.00667	SMAD3
Corticotropin Releasing Hormone Signaling	0.619		0.0069	VEGFA
D-myo-inositol (1,4,5,6)-Tetrakisphosphate Biosynthesis	0.626		0.00704	PPP1R1B
D-myo-inositol (3,4,5,6)-tetrakisphosphate Biosynthesis	0.626		0.00704	PPP1R1B
Cardiac β-adrenergic Signaling	0.629		0.00709	PDE3B
Insulin Receptor Signaling	0.632		0.00714	PDE3B
Iron homeostasis signaling pathway	0.64		0.0073	SMAD3
Androgen Signaling	0.643		0.00735	SMAD3
Atherosclerosis Signaling	0.669		0.00787	PDGFC
CCR3 Signaling in Eosinophils	0.678		0.00806	MYLK
RhoA Signaling	0.681		0.00813	MYLK
LXR/RXR Activation	0.688		0.00826	LBP
GP6 Signaling Pathway	0.694		0.0084	LAMC3
Airway Pathology in Chronic Obstructive Pulmonary Disease	0.698		0.00847	FGF12
Role of PKR in Interferon Induction and Antiviral Response	0.701		0.00855	PDGFC
Role of Tissue Factor in Cancer	0.701		0.00855	VEGFA
Sphingosine-1-phosphate Signaling	0.701		0.00855	PDGFC
Apelin Endothelial Signaling Pathway	0.708		0.0087	SMAD3
Glioma Signaling	0.725		0.00909	PDGFC
CDK5 Signaling	0.732		0.00926	PPP1R1B
PD-1, PD-L1 cancer immunotherapy pathway	0.739		0.00943	SMAD3
PPAR Signaling	0.747		0.00962	PDGFC
Chronic Myeloid Leukemia Signaling	0.751		0.00971	SMAD3
Apelin Cardiomyocyte Signaling Pathway	0.766		0.0101	MYLK
TGF-β Signaling	0.779		0.0104	SMAD3
FAK Signaling	0.783		0.0105	TNS1
Regulation of Actin-based Motility by Rho	0.787		0.0106	MYLK
Regulation of IL-2 Expression in Activated and Anergic T Lymphocytes	0.809		0.0112	SMAD3
PDGF Signaling	0.822		0.0116	PDGFC
TR/RXR Activation	0.832		0.0119	PDE3B
VEGF Family Ligand-Receptor Interactions	0.832		0.0119	VEGFA
LPS-stimulated MAPK Signaling	0.842		0.0122	LBP
Renal Cell Carcinoma Signaling	0.852		0.0125	VEGFA
Dopamine Receptor Signaling	0.867		0.013	PPP1R1B
Macropinocytosis Signaling	0.872		0.0132	PDGFC
Toll-like Receptor Signaling	0.872		0.0132	LBP
Hypoxia Signaling in the Cardiovascular System	0.883		0.0135	VEGFA
Leptin Signaling in Obesity	0.883		0.0135	PDE3B
Estrogen Receptor Signaling	0.894		0.0061	PDGFC,VEGFA
Heparan Sulfate Biosynthesis (Late Stages)	0.9		0.0141	AADAC
IL-10 Signaling	0.911		0.0145	LBP
Cell Cycle: G1/S Checkpoint Regulation	0.923		0.0149	SMAD3
Serotonin Degradation	0.923		0.0149	B3GAT3
Role of Macrophages, Fibroblasts and Endothelial Cells in Rheumatoid Arthritis	0.93		0.00641	PDGFC,VEGFA
Nicotine Degradation II	0.936		0.0154	B3GAT3
Superpathway of Melatonin Degradation	0.936		0.0154	B3GAT3
Melatonin Degradation I	0.969		0.0167	B3GAT3
SPINK1 Pancreatic Cancer Pathway	0.969		0.0167	SMAD3
Dermatan Sulfate Biosynthesis	0.976		0.0169	B3GAT3
Nicotine Degradation III	0.99		0.0175	B3GAT3
Chondroitin Sulfate Biosynthesis	0.997		0.0179	B3GAT3
Triacylglycerol Degradation	1.07		0.0213	AADAC
FAT10 Cancer Signaling Pathway	1.08		0.0217	SMAD3
iNOS Signaling	1.09		0.0222	LBP
Apelin Pancreas Signaling Pathway	1.1		0.0227	PDE3B
tRNA Splicing	1.11		0.0233	PDE3B
Antiproliferative Role of TOB in T Cell Signaling	1.15		0.0256	SMAD3
Thyroid Hormone Metabolism II (via Conjugation and/or Degradation)	1.16		0.0263	B3GAT3
Sperm Motility	1.18		0.00897	FGFR2,FGFR3
Axonal Guidance Signaling	1.2		0.0062	PDGFC,SHANK2,VEGFA
Inhibition of Angiogenesis by TSP1	1.2		0.0294	VEGFA
Retinoate Biosynthesis I	1.2		0.0294	DHRS3
mTOR Signaling	1.22		0.00952	PDGFC,VEGFA
HIF1α Signaling	1.24		0.00976	PDGFC,VEGFA
IL-8 Signaling	1.26		0.01	PDGFC,VEGFA
ILK Signaling	1.3		0.0105	PDGFC,VEGFA
Ephrin Receptor Signaling	1.34		0.0111	PDGFC,VEGFA
NF-κB Signaling	1.35		0.0112	FGFR2,FGFR3
T Cell Exhaustion Signaling Pathway	1.36		0.0114	SMAD3,VEGFA
The Visual Cycle	1.43		0.05	DHRS3
eNOS Signaling	1.44		0.0126	PDGFC,VEGFA
Relaxin Signaling	1.49		0.0133	PDE3B,VEGFA
Endocannabinoid Cancer Inhibition Pathway	1.52		0.014	PDGFC,VEGFA
Ovarian Cancer Signaling	1.55		0.0144	PDGFC,VEGFA
Cellular Effects of Sildenafil (Viagra)	1.59		0.0153	MYLK,PDE3B
PTEN Signaling	1.62		0.0159	FGFR2,FGFR3
IL-6 Signaling	1.63		0.016	LBP,VEGFA
IL-15 Production	1.66		0.0165	FGFR2,FGFR3
VEGF Signaling	1.82		0.0202	PDGFC,VEGFA
Amyotrophic Lateral Sclerosis Signaling	1.84		0.0206	PDGFC,VEGFA
PAK Signaling	1.84		0.0206	MYLK,PDGFC
Cardiac Hypertrophy Signaling (Enhanced)	1.88	2	0.00821	FGF12,FGFR2,FGFR3,PDE3B
Glycoaminoglycan-protein Linkage Region Biosynthesis	1.88		0.143	B3GAT3
Colorectal Cancer Metastasis Signaling	1.92		0.0119	PDGFC,SMAD3,VEGFA
HIPPO signaling	1.95		0.0235	SMAD3,WWC1
BEX2 Signaling Pathway	2.01		0.0253	PDGFC,VEGFA
Heparan Sulfate Biosynthesis	2.02		0.0256	AADAC,B3GAT3
Phenylalanine Degradation I (Aerobic)	2.12		0.25	PAH
Protein Kinase A Signaling	2.17		0.01	MYLK,PDE3B,PPP1R1B,SMAD3
RAR Activation	2.23		0.0155	DHRS3,SMAD3,VEGFA
Clathrin-mediated Endocytosis Signaling	2.24		0.0155	FGF12,PDGFC,VEGFA
Tyrosine Biosynthesis IV	2.25		0.333	PAH
Hepatic Fibrosis Signaling Pathway	2.3	2	0.0109	MYLK,PDGFC,SMAD3,VEGFA
Retinol Biosynthesis	2.54		0.0476	AADAC,DHRS3
STAT3 Pathway	2.67		0.0222	FGFR2,FGFR3,VEGFA
Adipogenesis pathway	2.68		0.0224	FGFR2,FGFR3,SMAD3
White Adipose Tissue Browning Pathway	2.73		0.0233	FGFR2,FGFR3,VEGFA
Pancreatic Adenocarcinoma Signaling	2.94		0.0275	PDGFC,SMAD3,VEGFA
Nitric Oxide Signaling in the Cardiovascular System	3.06		0.0303	PDE3B,PDGFC,VEGFA
Actin Cytoskeleton Signaling	3.12		0.0183	FGF12,LBP,MYLK,PDGFC
Osteoarthritis Pathway	3.17	1	0.019	FGFR3,PDGFC,SMAD3,VEGFA
FGF Signaling	3.27		0.0357	FGF12,FGFR2,FGFR3
Regulation of the Epithelial-Mesenchymal Transition Pathway	3.33		0.0208	FGF12,FGFR2,FGFR3,SMAD3
Human Embryonic Stem Cell Pluripotency	3.91		0.0296	FGFR2,FGFR3,PDGFC,SMAD3
Bladder Cancer Signaling	4.47		0.0412	FGF12,FGFR3,PDGFC,VEGFA
Regulation Of The Epithelial Mesenchymal Transition By Growth Factors Pathway	4.56	2	0.0266	FGF12,FGFR2,FGFR3,PDGFC,SMAD3
Hepatic Fibrosis / Hepatic Stellate Cell Activation	4.59		0.0269	FGFR2,LBP,PDGFC,SMAD3,VEGFA

## Sheet: M4_C2vC1
© 2000-2020 QIAGEN. All rights reserved.
Ingenuity Canonical Pathways	-log(p-value)	zScore	Ratio	Molecules
Breast Cancer Regulation by Stathmin1	0		0.00169	ADRB2
Cardiac Hypertrophy Signaling (Enhanced)	0		0.00205	ADRB2
Estrogen Receptor Signaling	0		0.00305	MDK
Neuroinflammation Signaling Pathway	0		0.00334	CRP
Systemic Lupus Erythematosus In B Cell Signaling Pathway	0		0.00364	TRAF4
Phospholipase C Signaling	0.202		0.00389	PEBP1
Cardiac Hypertrophy Signaling	0.219		0.00417	ADRB2
Huntington's Disease Signaling	0.223		0.00422	HSPA2
Sperm Motility	0.239		0.00448	NTRK2
Osteoarthritis Pathway	0.255		0.00474	SPP1
Axonal Guidance Signaling	0.255		0.00413	ADAMTS16,NTRK2
HIF1α Signaling	0.263		0.00488	HSPA2
Superpathway of Inositol Phosphate Compounds	0.271		0.00503	ATP1A1
Natural Killer Cell Signaling	0.274		0.00508	HSPA2
Regulation of the Epithelial-Mesenchymal Transition Pathway	0.282		0.00521	ID2
ILK Signaling	0.285		0.00526	LIMS1
Production of Nitric Oxide and Reactive Oxygen Species in Macrophages	0.288		0.00532	APOE
Regulation Of The Epithelial Mesenchymal Transition By Growth Factors Pathway	0.288		0.00532	ID2
NF-κB Signaling	0.303		0.00559	NTRK2
PI3K/AKT Signaling	0.31		0.00571	LIMS1
Wnt/β-catenin Signaling	0.313		0.00578	SFRP4
3-phosphoinositide Biosynthesis	0.326		0.00602	ATP1A1
HOTAIR Regulatory Pathway	0.338		0.00625	SPP1
eNOS Signaling	0.34		0.00629	HSPA2
Gαq Signaling	0.342		0.00633	RGS2
D-myo-inositol-5-phosphate Metabolism	0.344		0.00637	ATP1A1
3-phosphoinositide Degradation	0.346		0.00641	ATP1A1
D-myo-inositol (1,4,5,6)-Tetrakisphosphate Biosynthesis	0.376		0.00704	ATP1A1
D-myo-inositol (3,4,5,6)-tetrakisphosphate Biosynthesis	0.376		0.00704	ATP1A1
Hepatic Fibrosis Signaling Pathway	0.385		0.00543	PDCD4,SPP1
Human Embryonic Stem Cell Pluripotency	0.393		0.00741	NTRK2
STAT3 Pathway	0.393		0.00741	NTRK2
IL-12 Signaling and Production in Macrophages	0.4		0.00758	APOE
p70S6K Signaling	0.408		0.00775	EEF2
Atherosclerosis Signaling	0.413		0.00787	APOE
FXR/RXR Activation	0.416		0.00794	APOE
PTEN Signaling	0.416		0.00794	NTRK2
IL-6 Signaling	0.418		0.008	CRP
IL-15 Production	0.43		0.00826	NTRK2
LXR/RXR Activation	0.43		0.00826	APOE
Role of NANOG in Mammalian Embryonic Stem Cell Pluripotency	0.435		0.0084	LIFR
Role of PKR in Interferon Induction and Antiviral Response	0.441		0.00855	HSPA2
NGF Signaling	0.45		0.00877	TRAF4
CDK5 Signaling	0.469		0.00926	NTRK2
Virus Entry via Endocytic Pathways	0.472		0.00935	AP3S1
Role of Macrophages, Fibroblasts and Endothelial Cells in Rheumatoid Arthritis	0.474		0.00641	SFRP4,TRAF4
Synaptogenesis Signaling Pathway	0.474		0.00641	APOE,NTRK2
PD-1, PD-L1 cancer immunotherapy pathway	0.476		0.00943	PDCD4
Neuropathic Pain Signaling In Dorsal Horn Neurons	0.493		0.0099	NTRK2
Apoptosis Signaling	0.5		0.0101	GAS2
Salvage Pathways of Pyrimidine Ribonucleotides	0.503		0.0102	CDA
Death Receptor Signaling	0.53		0.011	GAS2
Altered T Cell and B Cell Signaling in Rheumatoid Arthritis	0.534		0.0111	SPP1
G-Protein Coupled Receptor Signaling	0.554		0.00735	ADRB2,RGS2
IL-17 Signaling	0.578		0.0125	CRP
BEX2 Signaling Pathway	0.582		0.0127	SPP1
Thyroid Cancer Signaling	0.582		0.0127	NTRK2
Heparan Sulfate Biosynthesis	0.587		0.0128	HS6ST2
VDR/RXR Activation	0.587		0.0128	SPP1
Neurotrophin/TRK Signaling	0.597		0.0132	NTRK2
Toll-like Receptor Signaling	0.597		0.0132	TRAF4
Hypoxia Signaling in the Cardiovascular System	0.607		0.0135	UBE2E3
GPCR-Mediated Integration of Enteroendocrine Signaling Exemplified by an L Cell	0.612		0.0137	ADRB2
Heparan Sulfate Biosynthesis (Late Stages)	0.622		0.0141	HS6ST2
Small Cell Lung Cancer Signaling	0.622		0.0141	TRAF4
cAMP-mediated signaling	0.663		0.00877	ADRB2,RGS2
Role of Osteoblasts, Osteoclasts and Chondrocytes in Rheumatoid Arthritis	0.686		0.00909	SFRP4,SPP1
Dermatan Sulfate Biosynthesis	0.693		0.0169	HS6ST2
Maturity Onset Diabetes of Young (MODY) Signaling	0.693		0.0169	APOE
AMPK Signaling	0.704		0.00935	ADRB2,EEF2
CNTF Signaling	0.707		0.0175	LIFR
Glutamate Receptor Signaling	0.707		0.0175	HOMER2
Integrin Signaling	0.707		0.00939	LIMS1,TSPAN7
Chondroitin Sulfate Biosynthesis	0.714		0.0179	HS6ST2
Unfolded protein response	0.714		0.0179	HSPA2
Lymphotoxin β Receptor Signaling	0.735		0.0189	TRAF4
Assembly of RNA Polymerase II Complex	0.758		0.02	TAF15
Myc Mediated Apoptosis Signaling	0.758		0.02	ADRB2
Clathrin-mediated Endocytosis Signaling	0.773		0.0104	AP3S1,APOE
Chondroitin Sulfate Biosynthesis (Late Stages)	0.774		0.0208	HS6ST2
Stearate Biosynthesis I (Animals)	0.774		0.0208	LIPT2
Dermatan Sulfate Biosynthesis (Late Stages)	0.791		0.0217	HS6ST2
Role of Oct4 in Mammalian Embryonic Stem Cell Pluripotency	0.791		0.0217	SPP1
BAG2 Signaling Pathway	0.818		0.0233	HSPA2
Acute Phase Response Signaling	0.824		0.0112	APCS,CRP
Triacylglycerol Biosynthesis	0.827		0.0238	LIPT2
Estrogen Biosynthesis	0.837		0.0244	CYP4F8
Glucocorticoid Receptor Signaling	0.86		0.00893	ADRB2,HSPA2,TAF15
Superpathway of Methionine Degradation	0.878		0.027	CBS/CBSL
Noradrenaline and Adrenaline Degradation	0.901		0.0286	ALDH1B1
Aldosterone Signaling in Epithelial Cells	0.911		0.0127	HSPA2,HSPE1
Ethanol Degradation II	0.937		0.0312	ALDH1B1
Glutathione-mediated Detoxification	0.937		0.0312	GSTT2/GSTT2B
Acetone Degradation I (to Methylglyoxal)	0.95		0.0323	CYP4F8
Xenobiotic Metabolism General Signaling Pathway	0.983		0.014	GSTT2/GSTT2B,UGT2B7
Gluconeogenesis I	1.02		0.0385	ALDOC
Glycolysis I	1.02		0.0385	ALDOC
Bupropion Degradation	1.04		0.04	CYP4F8
Tryptophan Degradation X (Mammalian, via Tryptamine)	1.04		0.04	ALDH1B1
Cysteine Biosynthesis III (mammalia)	1.06		0.0417	CBS/CBSL
Reelin Signaling in Neurons	1.06		0.0155	APOE,DCX
Protein Ubiquitination Pathway	1.06		0.011	HSPA2,HSPE1,UBE2E3
Ethanol Degradation IV	1.07		0.0435	ALDH1B1
Putrescine Degradation III	1.11		0.0476	ALDH1B1
Fatty Acid α-oxidation	1.13		0.05	ALDH1B1
Oxidative Ethanol Degradation III	1.15		0.0526	ALDH1B1
Gαs Signaling	1.2		0.0187	ADRB2,RGS2
Histamine Degradation	1.2		0.0588	ALDH1B1
γ-linolenate Biosynthesis II (Animals)	1.2		0.0588	FADS2
Mouse Embryonic Stem Cell Pluripotency	1.23		0.0194	ID2,LIFR
Choline Biosynthesis III	1.25		0.0667	PCYT1B
Superpathway of Citrulline Metabolism	1.25		0.0667	OAT
Apelin Adipocyte Signaling Pathway	1.4		0.0244	GPX2,GSTT2/GSTT2B
Citrulline Biosynthesis	1.47		0.111	OAT
Sucrose Degradation V (Mammalian)	1.47		0.111	ALDOC
Salvage Pathways of Pyrimidine Deoxyribonucleotides	1.52		0.125	CDA
Phosphatidylcholine Biosynthesis I	1.58		0.143	PCYT1B
Arginine Biosynthesis IV	1.64		0.167	OAT
Arginine Degradation VI (Arginase 2 Pathway)	1.64		0.167	OAT
Ceramide Biosynthesis	1.64		0.167	SPTSSA
Glycine Cleavage Complex	1.64		0.167	GCSH
Nicotine Degradation III	1.7		0.0351	CYP4F8,UGT2B7
Eumelanin Biosynthesis	1.72		0.2	DDT
Proline Biosynthesis II (from Arginine)	1.72		0.2	OAT
α-tocopherol Degradation	1.72		0.2	CYP4F8
Aryl Hydrocarbon Receptor Signaling	1.75		0.021	ALDH1B1,ALDH1L1,GSTT2/GSTT2B
Arginine Degradation I (Arginase Pathway)	1.82		0.25	OAT
Diphthamide Biosynthesis	1.94		0.333	EEF2
Thiosulfate Disproportionation III (Rhodanese)	1.94		0.333	TST
Thyroid Hormone Metabolism II (via Conjugation and/or Degradation)	2.03		0.0526	Sult1a1,UGT2B7
Cysteine Biosynthesis/Homocysteine Degradation	2.12		0.5	CBS/CBSL
Glycine Degradation (Creatine Biosynthesis)	2.12		0.5	GAMT
NRF2-mediated Oxidative Stress Response	2.22		0.0212	FMO1,GPX2,GSTT2/GSTT2B,UBE2E3
Dopamine Degradation	2.23		0.0667	ALDH1B1,Sult1a1
Xenobiotic Metabolism AHR Signaling Pathway	2.37		0.0353	ALDH1B1,ALDH1L1,GSTT2/GSTT2B
Glutathione Redox Reactions I	2.42		0.0833	GPX2,GSTT2/GSTT2B
Serotonin Degradation	2.66		0.0448	ALDH1B1,Sult1a1,UGT2B7
Nicotine Degradation II	2.7		0.0462	CYP4F8,FMO1,UGT2B7
Superpathway of Melatonin Degradation	2.7		0.0462	CYP4F8,Sult1a1,UGT2B7
Melatonin Degradation I	2.8		0.05	CYP4F8,Sult1a1,UGT2B7
Oleate Biosynthesis II (Animals)	2.96		0.154	FADS2,Scd2
Xenobiotic Metabolism PXR Signaling Pathway	3.07	2.23607	0.026	ALDH1B1,ALDH1L1,GSTT2/GSTT2B,HS6ST2,UGT2B7
Xenobiotic Metabolism Signaling	3.08		0.0209	ALDH1B1,ALDH1L1,FMO1,GSTT2/GSTT2B,HS6ST2,UGT2B7
LPS/IL-1 Mediated Inhibition of RXR Function	3.65		0.0268	ALDH1B1,ALDH1L1,APOE,FMO1,GSTT2/GSTT2B,HS6ST2
Xenobiotic Metabolism CAR Signaling Pathway	4.06	2.44949	0.0317	ALDH1B1,ALDH1L1,FMO1,GSTT2/GSTT2B,HS6ST2,UGT2B7
