# Supplementary material for: Single-cell transcriptome analysis defines heterogeneity of the murine pancreatic ductal tree
Source: eLife. 2021 May 19;10:e67776. doi: 10.7554/eLife.67776 (PMC8184217; doi:10.7554/eLife.67776)
Supplement: Figure 5—source data 2. [file elife-67776-fig5-data2.xls]

## Sheet: M14_C1vC0
© 2000-2020 QIAGEN. All rights reserved.
Upstream Regulator	Expr Log Ratio	Molecule Type	Predicted Activation State	Activation z-score	p-value of overlap	Target molecules in dataset	Mechanistic Network
HMGA1		transcription regulator		0.765	4.08e-06	ARL4A,CRYAB,IGF1,IGFBP7,LY6E,SOD3
beta-estradiol		chemical - endogenous mammalian		0.496	5.58e-06	ARL4A,BLNK,CD14,CP,CRIM1,CXCL12,ERBB2,IGF1,IGFBP7,MPDZ,NDRG1,PDZK1IP1,RBPMS,SEMA3C,SRP54,TIMP3,TSC22D3,TUFT1,TXNIP	AR,CEBPB,ESR2,HIF1A,Hdac,IFNG,NFKBIA,RNA polymerase II,TNF,TP53,beta-estradiol,estrogen receptor,progesterone,prostaglandin E2
GDF2		growth factor	Activated	2.186	6.02e-06	CRYAB,CXCL12,IGF1,SEMA3C,SLC6A6
thioacetamide		chemical toxicant	Activated	2.433	7.36e-06	BGN,CD14,CP,CSRP2,ERBB2,IGF1,PDGFD	Hdac,NFKBIA,TNF,TP53,estrogen receptor,thioacetamide
nitrofurantoin		chemical drug		0.64	7.6e-06	ANXA5,CP,ERBB2,GSTM1,IGF1,TIMP3
estrogen receptor		group		0.44	7.95e-06	CXCL12,ERBB2,IGF1,LY6E,PDGFD,TIMP3,TSC22D3	CITED1,ESR2,estrogen,estrogen receptor,raloxifene
raloxifene		chemical drug		-0.877	9.01e-06	BLNK,CXCL12,ERBB2,IGF1,NDRG1,TIMP3	ESR2,estrogen receptor,raloxifene
IFNG		cytokine		1.111	1e-05	BLNK,CD14,CHST8,CP,CXCL12,ERBB2,IGF1,LY6E,SLC6A6,SOD3,SRP54,SYT7,TIMP3,TSC22D3,TXNIP	HIF1A,Hdac,IFNG,IL1B,NFKBIA,RNA polymerase II,SMAD7,TNF,TP53,estrogen receptor,prostaglandin E2
progesterone		chemical - endogenous mammalian		0.894	1.17e-05	ALDH1A1,ARL4A,CP,CRYAB,CXCL12,ERBB2,IGF1,NDRG1,PDZK1IP1,TIMP3	AR,ESR2,HIF1A,IL1B,NFKBIA,SMAD7,TP53,progesterone
E. coli serotype 0127B8 lipopolysaccharide		chemical - endogenous non-mammalian		0.816	1.37e-05	CD14,CHST8,CXCL12,IGF1,PRDX5,SOD3	CEBPB,E. coli serotype 0127B8 lipopolysaccharide,IFNG,NFKBIA,RNA polymerase II
ERBB3		kinase		1.314	1.89e-05	BGN,CXCL12,ERBB2,NDRG1,TIMP3	ERBB3,ESR2
Alpha catenin		group	Inhibited	-2.201	2.41e-05	ADAM33,BGN,CXCL12,IGF1,IGFBP7
deferoxamine		chemical drug		0.818	2.52e-05	CD14,CP,FIS1,IGF1,NDRG1,NFATC4
ESR1		ligand-dependent nuclear receptor		1.13	3.17e-05	CP,CRIM1,CXCL12,DTNA,ERBB2,FIS1,IGF1,LTBP4,MPDZ,PDGFD,SEMA3C,SLC6A6,TSC22D3,TXNIP	AR,EP300,ESR1,ESR2,NFKBIA,TP53,WT1,beta-estradiol,estrogen receptor
NFKBIA		transcription regulator		1.89	3.43e-05	CP,CRYAB,CXCL12,ERBB2,LY6E,SEMA3C,SOD3,TIMP3	AR,HIF1A,Hdac,IKBKB,IL1B,NFKBIA,SMAD7,TNF,TP53,WT1,estrogen receptor
dihydrotestosterone		chemical - endogenous mammalian		1.384	4.19e-05	BGN,C1orf116,ERBB2,IGF1,IGFBP7,LY6E,NDRG1,SOD3,TIMP3	ERBB3,ESR2,dihydrotestosterone
KRAS		enzyme	Inhibited	-2.219	6.59e-05	BGN,CRYAB,FXYD3,GSTM1,LTBP4,MID1IP1,SH2D4A,SOD3,TIMP3,TXNIP
titanium dioxide		chemical drug			6.77e-05	CRYAB,ERBB2,IGF1
methylprednisolone		chemical drug		-1.046	7.64e-05	ALDH1A1,ARL4A,BAIAP2,BLNK,IGF1,PNRC1,SH2D4A,SOD3,TIMP3
CITED1		transcription regulator			7.87e-05	ERBB2,IGF1	CITED1,EP300,HIF1A
LLGL2		other			8.36e-05	CRIM1,NDRG1,SH2D4A
IL1B		cytokine		0.656	8.51e-05	BGN,CD14,CP,CRYAB,CXCL12,ERBB2,IGF1,SCX,TIMP3,TSC22D3,TXNIP	AR,CEBPB,EP300,HIF1A,Hdac,IFNG,IL1B,NFKBIA,RNA polymerase II,TNF,TP53,estrogen receptor,prostaglandin E2
KITLG		growth factor			8.67e-05	CD14,CXCL12,LY6E,MID1IP1,TSC22D3,TXNIP
nitric oxide		chemical - endogenous mammalian			9.14e-05	CXCL12,GSTM1,NDRG1,PRDX5,TIMP3
ALDH1A2		enzyme			0.000102	ALDH1A1,BGN,TIMP3	ALDH1A2,SMAD2,SMAD4
AR		ligand-dependent nuclear receptor	Activated	2.195	0.000104	ALDH1A1,CXCL12,ERBB2,FXYD3,GSTM1,IGF1,NDRG1,TIMP3	AR,ERBB3,ESR2,NFKBIA,TP53,WT1
SETD2		enzyme			0.000133	HHEX,IGF1,SEMA3C
CX3CR1		g-protein coupled receptor		0.577	0.000143	ANXA5,CD14,CRYAB,IGF1,TUFT1
ADAM10		peptidase			0.000148	CRYAB,CXCL12,DTNA,ICOS
MYB		transcription regulator		0.404	0.000155	BLNK,CD14,CXCL12,GSTM1,IGF1
SNTA1		other			0.000165	DTNA,IGF1
IKBKB		kinase		1.698	0.000168	CP,CXCL12,IGFBP7,SEMA3C,SOD3,TIMP3	AR,CHUK,Hdac,IKBKB,IKBKG,NFKBIA,TNF,TP53,WT1,estrogen receptor
TGFB1		growth factor	Activated	2.403	0.000169	ARL4A,BGN,CD14,CHST8,CSRP2,CXCL12,HHEX,IGF1,IGFBP7,PDZK1IP1,RBPMS,SOD3,TIMP3,TSC22D3,TXNIP	EP300,ESR1,ESR2,HIF1A,Hdac,IL1B,NFKBIA,SMAD7,TGFB1,TNF,TP53,beta-estradiol,estrogen receptor,prostaglandin E2
MKNK1		kinase	Activated	2	0.000195	ANXA5,CP,SFR1,TXNIP
GABP		complex			0.000219	ERBB2,SOD3
beta-carotene		chemical - endogenous mammalian			0.000248	LPGAT1,MID1IP1,SLC16A12
TP53		transcription regulator		1.373	0.000266	ALDH1A1,CP,CRYAB,CXCL12,ERBB2,FXYD3,GSTM1,IGF1,IGFBP7,MPDZ,NDRG1,SEMA3C,SLC6A6,TIMP3,TSC22D3	AR,ESR2,HIF1A,IKBKB,IL1B,NFKBIA,SMAD7,TP53,WT1
prostaglandin E2		chemical - endogenous mammalian	Activated	2.16	0.000286	CD14,CXCL12,ERBB2,IGF1,IGFBP7,TSC22D3	AR,CEBPB,EP300,HIF1A,Hdac,IFNG,IL1B,NFKBIA,RNA polymerase II,SMAD7,TNF,TP53,WT1,estrogen receptor,prostaglandin E2
calcitriol		chemical drug		1.126	0.000287	CD14,CXCL12,ERBB2,FIS1,IGF1,PRDX5,RBPMS,TXNIP	AR,HIF1A,Hdac,NFKBIA,PARP1,RNA polymerase II,TNF,TP53,calcitriol,estrogen receptor,prostaglandin E2
CHUK		kinase		1.432	0.000346	CP,CXCL12,SEMA3C,SOD3,TIMP3	CHUK,Hdac,IKBKB,IKBKG,NFKBIA,TNF,TP53,estrogen receptor
SB-431542		chemical reagent		-1	0.000414	BGN,CD14,IGF1,IGFBP7
lipopolysaccharide		chemical drug	Activated	2.153	0.000424	ANXA5,BGN,BLNK,CD14,CP,CRYAB,CXCL12,HHEX,HIVEP2,IGF1,PRDX5,SLC39A10,TIMP3,TSC22D3,TXNIP	HIF1A,Hdac,IL1B,NFKBIA,SMAD7,TNF,TP53,estrogen receptor,lipopolysaccharide
DYRK1B		kinase			0.000428	CP,SOD3
DETA-NONOate		chemical reagent			0.000487	BGN,SOD3,TXNIP
MMP1		peptidase			0.000487	CXCL12,ERBB2,IGF1	HIF1A,IL1B,MMP1,NFKBIA,SMAD7
AGT		growth factor		0.943	0.000493	BGN,CD14,CP,IGF1,NDRG1,SOD3,TXNIP	AGT,HIF1A,Hdac,IL1B,NFKBIA,SMAD7,TNF,TP53,estrogen receptor
WNT5A		cytokine		1.925	0.000511	CD14,CRYAB,CXCL12,ERBB2	HIF1A,Hdac,IL1B,NFKBIA,SMAD7,TNF,TP53,WNT5A,estrogen receptor
trientine		chemical drug			0.000513	IGF1,SOD3
DCN		other			0.000514	BGN,ERBB2,TIMP3	DCN,ERBB3,ESR2,HIF1A,IL1B,NFKBIA,SMAD2,SMAD4,SMAD7
WT1		transcription regulator			0.000542	ERBB2,IGF1,NDRG1,SLC6A6,TIMP3
IKBKG		kinase		1.98	0.00064	CP,CXCL12,SEMA3C,SOD3	CHUK,Hdac,IKBKB,IKBKG,NFKBIA,TNF,TP53,estrogen receptor
methapyrilene		chemical drug			0.000657	ANXA5,CP,GSTM1,IGF1
cadmium chloride		chemical toxicant			0.000663	ANXA5,CXCL12,GSTM1
TNF		cytokine		-1.17	0.000683	BGN,CD14,CP,CRYAB,CXCL12,ERBB2,ICOS,IGF1,RBPMS,SEMA3C,SOD3,TIMP3,TSC22D3,TXNIP	CEBPB,CHUK,EP300,ESR1,ESR2,HIF1A,IFNG,IL1B,NFKBIA,RNA polymerase II,SMAD7,TNF,TP53,beta-estradiol
CSF3R		transmembrane receptor			0.000705	CD14,CXCL12
GPS2		transcription regulator			0.000801	BLNK,CD14,HIVEP2
miR-17-5p (and other miRNAs w/seed AAAGUGC)		mature microrna			0.000801	BLNK,CRIM1,TXNIP
tributyrin		chemical drug			0.000838	C1orf116,NDRG1,TUFT1
rifampin		chemical drug			0.000852	ALDH1A1,CD14,CRYAB,SLC39A10
SOD1		enzyme			0.000915	CD14,CP,CRYAB,GSTM1,IGF1	HIF1A,IL1B,NFKBIA,SMAD7,SOD1
trichostatin A		chemical drug		0.931	0.000932	BAIAP2,CD14,CTBP2,CXCL12,ERBB2,NDRG1,SEMA3C,TIMP3,TXNIP	Hdac,NFKBIA,TNF,TP53,decitabine,estrogen receptor,trichostatin A
COLQ		other			0.000997	BGN,DTNA,LTBP4
RXRB		ligand-dependent nuclear receptor			0.00113	ALDH1A1,CRYAB,IGF1
ZFPM1		transcription regulator			0.00113	ANXA5,BLNK,SH2D4A
PD98059		chemical - kinase inhibitor		-0.928	0.00114	BGN,CD14,ERBB2,IGF1,LPGAT1,TSC22D3,TXNIP	ESR1,HIF1A,Hdac,IL1B,NFKBIA,PD98059,RNA polymerase II,SMAD7,TNF,TP53,estrogen receptor,prostaglandin E2
SIRT1		transcription regulator		0.557	0.00116	GSTM1,IGF1,LY6E,SCX,SOD3,TIMP3
Hdac		group		0.577	0.0013	ERBB2,IGF1,SEMA3C,TXNIP	ESR1,Hdac,NFKBIA,TNF,TP53,estrogen receptor
captopril		chemical drug			0.00137	BGN,CP,CSRP2
S100A9		other		0	0.00139	ALDH1A1,CP,IGF1,TXNIP
MLX		transcription regulator			0.00146	MID1IP1,TXNIP
CEBPB		transcription regulator		1.751	0.00146	ALDH1A1,BLNK,CD14,CP,IGF1,SRP54	CEBPB,RNA polymerase II
fluticasone propionate		chemical drug		-1	0.00148	BGN,GSTM1,TIMP3,TSC22D3
EPO		cytokine			0.0015	CXCL12,LY6E,MID1IP1,TSC22D3,TXNIP
doxorubicin		chemical drug		1.293	0.0016	CD14,CP,ERBB2,IGFBP7,NDRG1,SLC6A6	AR,NFKBIA,TP53,WT1,doxorubicin
SCX	0.035	transcription regulator			0.00161	SCX,TIMP3
YY1		transcription regulator		1.951	0.00161	BLNK,CRYAB,CXCL12,ERBB2,PDGFD
gefitinib		chemical drug			0.00164	ALDH1A1,ERBB2,IGF1,TIMP3	AR,ESR2,TP53,gefitinib
LEPR		transmembrane receptor			0.00175	ANXA5,IGF1,TIMP3,TSC22D3
S100A8		other		0	0.00175	ALDH1A1,CP,IGF1,TXNIP
trans-hydroxytamoxifen		chemical drug		-1.982	0.00175	BLNK,CXCL12,ERBB2,NDRG1	ESR2,trans-hydroxytamoxifen
cisplatin		chemical drug	Activated	2.373	0.0018	ALDH1A1,ANXA5,CD14,CP,GSTM1,SLC6A6,TIMP3,TXNIP
decitabine		chemical drug		1.346	0.00199	BAIAP2,CTBP2,CXCL12,ERBB2,IGFBP7,NDRG1,SEMA3C,TIMP3	AR,NFKBIA,TP53,WT1,decitabine
vancomycin		biologic drug			0.00201	CD14,CP,SOD3
TCF		group			0.00228	ALDH1A1,ARL4A,SEMA3C	CTNNB1,SMAD4,TCF
PDGF BB		complex		0.108	0.00244	CP,CRYAB,CSRP2,IGF1,SLC6A6
K-252		chemical drug			0.00246	CD14,NDRG1
TGFBR2		kinase			0.00251	BGN,CD14,CRYAB,TXNIP
HNF4A		transcription regulator		-1.067	0.00255	ALDH1A1,ANXA5,CP,FMO3,IGF1,LPGAT1,MID1IP1,NDRG1,PRDX5,SEMA3C,SRP54,TIMP3,TUFT1,TXNIP
CXCL12	0.046	cytokine		0.83	0.00256	CD14,CXCL12,ERBB2,IGFBP7
SMAD2		transcription regulator			0.00265	BGN,HHEX,TIMP3	CTNNB1,SMAD2,SMAD4
BMPR2		kinase			0.00266	CXCL12,SEMA3C
rifaximin		chemical drug			0.00266	ANXA5,NDRG1
allopurinol		chemical drug			0.00273	CD14,CP,TXNIP
ETV5		transcription regulator			0.00281	CXCL12,MID1IP1,TIMP3
FOXO3		transcription regulator		0.794	0.00281	IGF1,IGFBP7,NDRG1,PRDX5,TXNIP
2',5'-dideoxyadenosine		chemical reagent			0.00284	IGF1
2'-adenylic acid		chemical - endogenous mammalian			0.00284	TXNIP
3'-adenylic acid		chemical - endogenous mammalian			0.00284	TXNIP
ANKRD12		other			0.00284	ERBB2
ATOX1		transporter			0.00284	SOD3
CYTL1		cytokine			0.00284	IGF1
DECR1		enzyme			0.00284	ERBB2
Gm26504		other			0.00284	IGF1
JAM2		other			0.00284	CXCL12
NOCT		transcription regulator			0.00284	IGF1
Oxi-4503		chemical drug			0.00284	CXCL12
PTS		enzyme			0.00284	IGF1
SGTA		other			0.00284	IGF1
TPH2		enzyme			0.00284	IGF1
TUBB3		other			0.00284	ANXA5
allose		chemical - endogenous mammalian			0.00284	TXNIP
anti-miR-29a inhibitor		chemical reagent			0.00284	TIMP3
bathophenanthroline		chemical reagent			0.00284	CP
miR-548d-3p (and other miRNAs w/seed AAAAACC)		mature microrna			0.00284	ERBB2
mir-219		microrna			0.00284	ICOS
oligomycin A		chemical - endogenous non-mammalian			0.00284	TXNIP
sodium acetate		chemical drug			0.00284	MPDZ
tartaric acid		chemical reagent			0.00284	ERBB2
vanoxerine		chemical drug			0.00284	SOD3
LATS1		kinase			0.00285	CD14,ERBB2
NCF1		enzyme			0.00285	CD14,IGF1
GLI1		transcription regulator		1.982	0.00304	IGF1,IGFBP7,RRAS2,TIMP3
ELF1		transcription regulator			0.00306	ERBB2,SOD3
L-arginine		chemical - endogenous mammalian			0.00306	BGN,IGF1
dexamethasone		chemical drug		1.478	0.00324	ALDH1A1,BGN,CP,CRYAB,CXCL12,GSTM1,IGF1,LTBP4,LY6E,MID1IP1,SLC39A10,TIMP3,TSC22D3,TXNIP	AR,Hdac,NFKBIA,TNF,TP53,WT1,dexamethasone,estrogen receptor
SIAH2		transcription regulator			0.00327	FXYD3,NDRG1
RAF1		kinase		1.982	0.00336	CRYAB,ERBB2,LPGAT1,TXNIP
carbon tetrachloride		chemical toxicant			0.00348	GSTM1,IGF1,PDGFD,TIMP3
ACKR3		g-protein coupled receptor			0.00349	CXCL12,IGFBP7
DRD2		g-protein coupled receptor			0.00349	CRYAB,IGF1
PPARGC1A		transcription regulator		-0.377	0.00359	ERBB2,IGFBP7,PRDX5,SEMA3C,TIMP3
ESR2		ligand-dependent nuclear receptor			0.00369	ARL4A,CRIM1,CXCL12,ERBB2,IGF1,NDRG1	CITED1,EP300,ESR1,ESR2,TP53,beta-estradiol,estrogen,estrogen receptor,raloxifene
EIF2AK3		kinase			0.00369	IGF1,NDRG1,TXNIP	DDIT3,EIF2AK3,FOXO3
ELF3		transcription regulator			0.00372	ERBB2,TIMP3
puromycin aminonucleoside		chemical reagent			0.00378	CD14,CP,SOD3
LY294002		chemical - kinase inhibitor	Inhibited	-2.387	0.00393	CD14,CP,IGF1,MPDZ,NDRG1,SEMA3C	AR,LY294002,NFKBIA,TP53,WT1
RXRG		ligand-dependent nuclear receptor			0.00395	CRYAB,TIMP3
GNA15		enzyme			0.00408	CP,CRYAB,SLC6A6
CCR2		g-protein coupled receptor			0.00418	BGN,CXCL12,IGF1
P38 MAPK		group		1.997	0.00426	ANXA5,BGN,CXCL12,NFATC4,TIMP3
lactic acid		chemical - endogenous mammalian			0.00444	CXCL12,IGF1	AR,EP300,HIF1A,lactic acid
DDIT3		transcription regulator			0.0046	NDRG1,TSC22D3,TXNIP
HNF1B		transcription regulator			0.00494	BGN,PDZK1IP1,SEMA3C
POU2F1		transcription regulator			0.00494	GSTM1,LY6E,TIMP3
CD80		transmembrane receptor			0.00495	ICOS,TSC22D3
histone deacetylase inhibitor		chemical drug			0.00495	ERBB2,TXNIP	ESR1,Hdac,histone deacetylase inhibitor
staurosporine		chemical - kinase inhibitor			0.00505	ANXA5,ERBB2,IGF1	AR,PARP1,staurosporine
PARP1		enzyme			0.00517	CXCL12,ERBB2,IGF1	AR,ESR2,HIF1A,IL1B,NFKBIA,PARP1,SMAD7,TP53
SMAD4		transcription regulator		0.686	0.00517	BGN,ERBB2,HHEX,TIMP3	CTNNB1,SMAD2,SMAD4,TCF
prednisolone		chemical drug		-0.577	0.00517	IGF1,SOD3,TSC22D3,TXNIP
CTNNB1		transcription regulator			0.00524	ALDH1A1,ARL4A,BGN,CXCL12,HHEX,LY6E,SEMA3C,TIMP3	CTNNB1,SMAD2,SMAD4,TCF
bortezomib		chemical drug		-0.577	0.0054	CRYAB,CXCL12,ERBB2,IGF1	AR,EP300,HIF1A,Hdac,NFKBIA,PARP1,TNF,TP53,WT1,bortezomib,estrogen receptor
NSUN6		enzyme			0.00548	CRIM1,NDRG1
ethionine		chemical toxicant			0.00548	CD14,CP
IL1A		cytokine		-0.132	0.00555	ALDH1A1,CXCL12,IGF1,PDZK1IP1
HMOX1		enzyme			0.00565	CD14,CXCL12,IGF1
2-hydroxy-imino phenylpyruvic acid		chemical reagent			0.00566	CTBP2
2-keto-4-methylthiobutyric acid		chemical - endogenous mammalian			0.00566	CTBP2
3-O-methylglucose		chemical reagent			0.00566	TXNIP
ACP3		phosphatase			0.00566	ERBB2
ADAMTS5		peptidase			0.00566	BGN
ADGRG1		g-protein coupled receptor			0.00566	IGF1
Alocasia cucullata root extract		chemical reagent			0.00566	CD14
BIIB028		chemical drug			0.00566	ERBB2
CDO1		enzyme			0.00566	IGF1
DPP10-AS1		other			0.00566	TIMP3
FS-93		chemical reagent			0.00566	ERBB2
Hsf4		transcription regulator			0.00566	CRYAB
IGFALS		other			0.00566	IGF1
KR 62436		chemical reagent			0.00566	CXCL12
KT 5926		chemical - kinase inhibitor			0.00566	CD14
LEPROT		other			0.00566	IGF1
LEPROTL1		other			0.00566	IGF1
MEX3C		other			0.00566	IGF1
MLXIP		transcription regulator			0.00566	TXNIP
PF-04928473		chemical reagent			0.00566	ERBB2
PLCD4		enzyme			0.00566	ERBB2
RBM17		other			0.00566	ERBB2
SPR		enzyme			0.00566	IGF1
ZIC5		transcription regulator			0.00566	PDGFD
ZNF366		transcription regulator			0.00566	TSC22D3
clorobiocin		chemical drug			0.00566	ERBB2
coumermycin		chemical drug			0.00566	ERBB2
ipilimumab		biologic drug			0.00566	ICOS
lanreotide		biologic drug			0.00566	IGF1
miR-1195 (miRNAs w/seed GAGUUCG)		mature microrna			0.00566	IGF1
miR-411-5p (and other miRNAs w/seed AGUAGAC)		mature microrna			0.00566	TXNIP
miR-548h-5p (and other miRNAs w/seed AAAGUAA)		mature microrna			0.00566	ERBB2
mir-136		microrna			0.00566	CXCL12
silipide		chemical drug			0.00566	ERBB2
LATS2		kinase			0.00576	CD14,ERBB2
tretinoin		chemical - endogenous mammalian		1.611	0.0058	ALDH1A1,ANXA5,CD14,CP,IGF1,IGFBP7,LY6E,NDRG1,PNRC1,SLC6A6,TSC22D3	AR,NFKBIA,TP53,WT1,tretinoin
AGTR1		g-protein coupled receptor			0.00605	CP,TXNIP
RCE1		peptidase			0.00605	CRYAB,CXCL12
WNT1		cytokine			0.00628	IGF1,LY6E,SEMA3C
SUMO2		enzyme			0.00634	LY6E,TSC22D3
PXR ligand-PXR-Retinoic acid-RXRα		complex			0.00663	ALDH1A1,GSTM1
OGA		enzyme		1.387	0.00682	CD14,HIVEP2,IGF1,IGFBP7,TIMP3
NR3C2		ligand-dependent nuclear receptor			0.00696	IGF1,SEMA3C,TSC22D3
cyclic AMP		chemical - endogenous mammalian		1.715	0.00698	CRYAB,ERBB2,IGF1,TXNIP	HIF1A,Hdac,IL1B,NFKBIA,SMAD7,TNF,TP53,cyclic AMP,estrogen receptor
FGF2		growth factor		0.984	0.00703	BGN,CRYAB,CXCL12,IGF1,TIMP3	FGF2,Hdac,NFKBIA,RET,TNF,TP53,estrogen receptor
NRG1		growth factor		1.972	0.00735	CRIM1,ERBB2,NDRG1,SH2D4A	ESR2,NRG1
MYD88		other		1.929	0.00754	ALDH1A1,CD14,CXCL12,IGF1
ritonavir		chemical drug			0.00768	CRYAB,SLC39A10,TSC22D3
RNA polymerase II		complex			0.00773	BLNK,CD14,ERBB2,IGF1
ZBTB16		transcription regulator			0.00783	CD14,ICOS,TSC22D3
EP300		transcription regulator			0.0081	CRIM1,ERBB2,IGF1,NDRG1,TXNIP	AR,EP300,HIF1A
NOS3		enzyme			0.00821	CXCL12,SOD3
HIF1A		transcription regulator	Activated	2.19	0.00825	BGN,CXCL12,ERBB2,IGF1,NDRG1	AR,EP300,ESR2,HIF1A,TP53
metribolone		chemical reagent		1.4	0.00841	C1orf116,CRYAB,IGF1,NDRG1,TXNIP	EP300,FOXO3,HIF1A,metribolone
AGPAT1		enzyme			0.00849	IGF1
DDX54		transcription regulator			0.00849	ERBB2
GNE-317		chemical - kinase inhibitor			0.00849	NDRG1
Gα12/13		group			0.00849	IGF1
Lycium barbarum polysaccharides		chemical - endogenous non-mammalian			0.00849	IGF1
MBD5		other			0.00849	IGF1
PRKD3		kinase			0.00849	NFATC4
RACGAP1		transporter			0.00849	CD14
RIMS2		other			0.00849	IGF1
apitolisib		chemical drug			0.00849	NDRG1
bacitracin		biologic drug			0.00849	ANXA5
botulinum toxin type A		biologic drug			0.00849	SCX
nickel subsulfide		chemical toxicant			0.00849	NDRG1
phloretin		chemical - endogenous non-mammalian			0.00849	TXNIP
protamine zinc insulin		biologic drug			0.00849	IGF1
taprostene		chemical reagent			0.00849	TSC22D3
PRL		cytokine		1.941	0.00853	ANXA5,ERBB2,GSTM1,LY6E
2-bromoethylamine		chemical reagent			0.00855	CD14,CP
butyric acid		chemical - endogenous mammalian		1.338	0.00856	ALDH1A1,ANXA5,LY6E,NFATC4,TIMP3
RET		kinase			0.0086	CRYAB,CXCL12,TIMP3	NFKBIA,RET,TP53
IL15		cytokine			0.00864	CXCL12,ERBB2,FMO3,ICOS,SYAP1
MYCN		transcription regulator			0.00895	ALDH1A1,CRIM1,IGFBP7,NDRG1
cyclosporin A		biologic drug		0.391	0.00896	BGN,CD14,CP,ICOS,SYT7
estrogen		chemical drug		-0.17	0.00917	CXCL12,ERBB2,IGF1,SCX	CITED1,EP300,ESR2,HIF1A,IL1B,NFKBIA,RNA polymerase II,SMAD7,calcitriol,estrogen,estrogen receptor
SMAD7		transcription regulator			0.00925	BGN,CXCL12,TIMP3	SMAD2,SMAD4,SMAD7
IL2		cytokine			0.00932	CXCL12,HHEX,ICOS,LY6E,NDRG1,RRAS2
CCN5		growth factor			0.00958	ERBB2,IGFBP7
WNT3A		cytokine		-1.067	0.00961	BGN,CXCL12,TIMP3,TXNIP	CTNNB1,SMAD4,TCF,WNT3A
Nr1h		group			0.0101	ALDH1A1,SYT7,TIMP3
IL4R		transmembrane receptor			0.0103	CD14,FXYD3
LMNB1		other			0.0103	CRYAB,CXCL12
tazemetostat		chemical drug		-0.277	0.0104	BAIAP2,CTBP2,ERBB2,SEMA3C
bisphenol A		chemical - endogenous mammalian			0.0104	CXCL12,IGF1,RBPMS
RXRA		ligand-dependent nuclear receptor			0.0105	ALDH1A1,CRYAB,IGF1,MID1IP1
Ccl2		cytokine			0.0107	CD14,IGF1
CD38		enzyme			0.0108	NDRG1,RBPMS,RRAS2
ARTN		growth factor			0.0113	ALDH1A1
B3GNT2		enzyme			0.0113	CD14
Co2+		chemical - endogenous mammalian			0.0113	NDRG1
FOXH1		transcription regulator			0.0113	ALDH1A1
ITPRID2		other			0.0113	IGF1
LRIG3		other			0.0113	ERBB2
PKIA		other			0.0113	IGF1
PTCH2		transmembrane receptor			0.0113	CXCL12
SLCO1C1		transporter			0.0113	ALDH1A1
ZXDC		transcription regulator			0.0113	CD14
arzoxifene		chemical drug			0.0113	IGF1
di-n-propyl disulfide		chemical reagent			0.0113	GSTM1
lansoprazole		chemical drug			0.0113	CD14
miR-331-3p (miRNAs w/seed CCCCUGG)		mature microrna			0.0113	ERBB2
NR1I2		ligand-dependent nuclear receptor			0.0114	ALDH1A1,GSTM1,IGF1
PAX5		transcription regulator			0.0114	BLNK,TXNIP
hexachlorobenzene		chemical toxicant			0.0114	CD14,CP
SP2509		chemical reagent		-0.277	0.0118	BAIAP2,CTBP2,ERBB2,SEMA3C
GPER1		g-protein coupled receptor			0.0118	IGF1,TUFT1
TWIST1		transcription regulator			0.0119	ALDH1A1,CXCL12,TIMP3
Ap1		complex			0.0123	CXCL12,IGF1,NDRG1
IGF2		growth factor			0.0125	ARL4A,IGF1,NDRG1
capsaicin		chemical drug			0.0126	ERBB2,IGF1
JUN		transcription regulator		1.969	0.0129	CD14,ERBB2,IGFBP7,SLC6A6,TIMP3
CXCR4		g-protein coupled receptor			0.013	CXCL12,IGFBP7
IL1R1		transmembrane receptor			0.013	CXCL12,IGF1
mir-27		microrna			0.013	CXCL12,IGF1
tamoxifen		chemical drug		1.754	0.0131	CXCL12,ERBB2,IGF1,NFATC4
PPARG		ligand-dependent nuclear receptor			0.0132	HIVEP2,IGF1,IGFBP7,NDRG1,TSC22D3
cardiotoxin		chemical - other			0.0133	BGN,IGF1,IGFBP7
carbon monoxide		chemical - endogenous mammalian			0.0134	CD14,CXCL12
mifepristone		chemical drug		-1	0.0138	CD14,GSTM1,NDRG1,TIMP3
CSF3		cytokine			0.0139	CD14,CXCL12,IGF1
EGFR		kinase		0.343	0.014	CRYAB,CXCL12,ERBB2,IGF1,TXNIP
BUD23		enzyme			0.0141	TSC22D3
HEPH		transporter			0.0141	CP
HTR4		g-protein coupled receptor			0.0141	CXCL12
MUC13		other			0.0141	ERBB2
PCA3		other			0.0141	NDRG1
SMPD3		enzyme			0.0141	IGF1
Z-endoxifen		chemical - endogenous mammalian			0.0141	IGF1
acetate		chemical - endogenous mammalian			0.0141	FIS1
luminespib		chemical drug			0.0141	ERBB2
retaspimycin		chemical drug			0.0141	ERBB2
sodium azide		chemical toxicant			0.0141	TXNIP
tideglusib		chemical drug			0.0141	IGF1
E2F3		transcription regulator			0.0141	IGF1,RBPMS,TIMP3
BDNF		growth factor	Inhibited	-2	0.0142	ANXA5,CP,SFR1,TXNIP
3-deazaneplanocin		chemical drug			0.0143	TIMP3,TSC22D3
gentamicin C		chemical drug			0.0143	CD14,CP
napabucasin		chemical drug			0.0143	ALDH1A1,ERBB2
lomustine		chemical drug			0.0147	CD14,CP
HOXA9		transcription regulator			0.0148	ALDH1A1,IGF1,TSC22D3
POR		enzyme			0.0148	ALDH1A1,ANXA5,GSTM1
triamterene		chemical drug			0.0151	CD14,CP
SPP1		cytokine			0.0154	CXCL12,ERBB2,IGF1
NKX2-1		transcription regulator			0.0157	CD14,FXYD3,Plscr2
PTGS2		enzyme			0.0159	CXCL12,ERBB2,IGF1
gemcitabine		chemical drug			0.016	CXCL12,ERBB2
FANCC		other			0.0164	CXCL12,HHEX
SMARCA2		transcription regulator			0.0164	CP,TUFT1
fenamic acid		chemical reagent			0.0164	CD14,CP
mir-133		microrna			0.0164	CTBP2,LPGAT1
PDX1		transcription regulator			0.0166	PDZK1IP1,SLC6A6,TXNIP
bromobenzene		chemical toxicant			0.0169	FMO3,GSTM1
clopidogrel		chemical drug			0.0169	CXCL12,LURAP1L
5R-hydroxytriptolide		chemical drug			0.0169	CD14
Ampa Receptor		complex			0.0169	ERBB2
BB-Cl-amidine		chemical reagent			0.0169	IGF1
BCL2L12		other			0.0169	CRYAB
CSRP3		other			0.0169	TXNIP
DNAJA3		other			0.0169	ERBB2
DSPP		other			0.0169	BGN
EPHA4		kinase			0.0169	IGF1
ERCC1		enzyme			0.0169	IGF1
ERCC3		enzyme			0.0169	IGF1
GSK690693		chemical drug			0.0169	ERBB2
ITGA11		other			0.0169	IGF1
LRIG1		other			0.0169	ERBB2
MUSK		kinase			0.0169	ERBB2
Msx3		transcription regulator			0.0169	IGF1
Npy4r		g-protein coupled receptor			0.0169	IGF1
PSMD4		other			0.0169	CD14
Rp-8-pCPT-cGMPS-triethylamine		chemical reagent			0.0169	SOD3
TAF10		transcription regulator			0.0169	IGF1
TNFRSF10A		transmembrane receptor			0.0169	CD14
miR-219a-5p (and other miRNAs w/seed GAUUGUC)		mature microrna			0.0169	CD14
miR-320b (and other miRNAs w/seed AAAGCUG)		mature microrna			0.0169	IGF1
ATF4		transcription regulator			0.017	IGFBP7,MID1IP1,NDRG1
miR-1-3p (and other miRNAs w/seed GGAAUGU)		mature microrna			0.0173	IGF1,SH2D4A,TIMP3
TCOF1		transporter			0.0174	MFAP1,NDRG1
miR-21-5p (and other miRNAs w/seed AGCUUAU)		mature microrna			0.0174	SOD3,TIMP3
bleomycin		chemical drug			0.0182	CXCL12,IGF1,TIMP3
U0126		chemical - kinase inhibitor		-1.067	0.0183	CXCL12,FMO3,ICOS,TIMP3,TSC22D3
bucladesine		chemical toxicant		1	0.0184	CD14,CRYAB,ERBB2,IGF1
NRAS		enzyme			0.0192	Plscr2,RBPMS,SCX
thapsigargin		chemical toxicant			0.0192	CP,ERBB2,IGF1
CBR3-AS1		other			0.0197	ERBB2
CHS-828		chemical drug			0.0197	ALDH1A1
ERBIN		other			0.0197	ERBB2
Elf5		transcription regulator			0.0197	ERBB2
FZD5		g-protein coupled receptor			0.0197	CD14
IGFBP4		other			0.0197	IGF1
KMT5B		enzyme			0.0197	TSC22D3
PTPRS		phosphatase			0.0197	IGF1
RIOX1		enzyme			0.0197	IGF1
SNED1		other			0.0197	IGF1
mir-320		microrna			0.0197	IGF1
retroinverso ERG inhibitory peptide 1		chemical reagent			0.0197	NDRG1
retroinverso ERG inhibitory peptide 2		chemical reagent			0.0197	NDRG1
tyrphostin AG825		chemical - kinase inhibitor			0.0197	ERBB2
Il3		cytokine			0.0197	CD14,IGF1
RELB		transcription regulator			0.0197	ANXA5,CXCL12
MAP2K6		kinase			0.0202	BGN,CRYAB
dinoprost		chemical - endogenous mammalian			0.0202	GSTM1,TIMP3
testosterone		chemical - endogenous mammalian		1.125	0.0203	BGN,ERBB2,IGF1,NDRG1
GNA12		enzyme			0.0207	BAIAP2,RRAS2
fenretinide		chemical drug			0.0212	IGF1,IGFBP7
romidepsin		biologic drug			0.0212	ERBB2,TIMP3
NFKB2		transcription regulator			0.0217	ANXA5,CXCL12
nelfinavir		chemical drug			0.0217	LURAP1L,TSC22D3
OSM		cytokine		1.378	0.0218	ARL4A,BAIAP2,CXCL12,PDZK1IP1,TIMP3
MYC		transcription regulator			0.0219	ANXA5,CRYAB,CSRP2,ERBB2,HIVEP2,MFAP1,NDRG1,TXNIP
PPP3CA		phosphatase			0.0222	CRYAB,PRDX5
ascorbic acid		chemical - endogenous mammalian			0.0222	IGF1,NDRG1
CCX771		chemical reagent			0.0225	CXCL12
Calcineurin B		group			0.0225	ICOS
ERCC4		enzyme			0.0225	IGF1
GRB10		other			0.0225	IGF1
GRIP1		transcription regulator			0.0225	IGF1
HDAC10		transcription regulator			0.0225	TXNIP
LDH (family)		group			0.0225	CXCL12
LY86		other			0.0225	CD14
RC3H2		enzyme			0.0225	ICOS
SLC39A14		transporter			0.0225	IGF1
SMN1/SMN2		other			0.0225	IGF1
TTN		kinase			0.0225	CRYAB
Thioredoxin reductase		group			0.0225	CXCL12
buserelin		biologic drug			0.0225	ANXA5
dithioerythritol		chemical - endogenous non-mammalian			0.0225	CXCL12
farnesyl transferase		complex			0.0225	CRYAB
itraconazole		chemical drug			0.0225	CD14
miR-140-5p (and other miRNAs w/seed AGUGGUU)		mature microrna			0.0225	CXCL12
miR-192-5p (and other miRNAs w/seed UGACCUA)		mature microrna			0.0225	IGF1
myxothiazol		chemical toxicant			0.0225	TXNIP
MTPN		transcription regulator			0.0227	CP,IGF1
delta-9-tetrahydrocannabinol		chemical drug			0.0227	ERBB2,ICOS
mir-17		microrna			0.0227	BLNK,TXNIP
SP1		transcription regulator			0.023	CRYAB,CXCL12,IGF1,NDRG1,TIMP3
Akt		group			0.0232	CP,CXCL12,IGF1,NDRG1
ANGPT2		growth factor			0.0232	CRYAB,SOD3,TXNIP
Jnk		group			0.0235	ANXA5,CXCL12,IGF1
cobalt chloride		chemical reagent			0.0238	CP,NDRG1
DMD		other			0.0238	BGN,BLNK,IGF1
IL6		cytokine		1.4	0.0241	BGN,CD14,CP,CRYAB,ICOS,IGF1
mycophenolic acid		chemical drug			0.0243	C1orf116,TUFT1
HSF1		transcription regulator			0.0244	CRYAB,CSRP2,SEMA3C
MAFB		transcription regulator			0.0248	CXCL12,IGF1
PIK3R1		kinase			0.0248	CXCL12,TXNIP
homocysteine		chemical - endogenous mammalian			0.0248	CXCL12,NDRG1
benzo(a)pyrene		chemical toxicant			0.0252	GSTM1,IGF1,SOD3
4-nonylphenol		chemical toxicant			0.0252	IGF1
ACACA		enzyme			0.0252	FIS1
ANPEP		peptidase			0.0252	NDRG1
CITCO		chemical reagent			0.0252	ALDH1A1
EIF3A		other			0.0252	NDRG1
GHSR		g-protein coupled receptor			0.0252	IGF1
L-lysine		chemical - endogenous mammalian			0.0252	IGF1
NPM1-ALK		fusion gene/product			0.0252	ICOS
SERPINB2		other			0.0252	CD14
TPM3		other			0.0252	IGF1
USP17L2 (includes others)		peptidase			0.0252	ALDH1A1
YBX3		transcription regulator			0.0252	ERBB2
abatacept		biologic drug			0.0252	ICOS
lead acetate		chemical toxicant			0.0252	GSTM1
novobiocin		chemical drug			0.0252	ERBB2
raltitrexed		chemical drug			0.0252	FXYD3
ERBB4		kinase			0.0254	CXCL12,TIMP3
IL7R		transmembrane receptor			0.0254	BAIAP2,C1orf116
NFYA		transcription regulator			0.0254	IGF1,TXNIP
TGFBR1		kinase			0.0259	BGN,SCX
NCOA3		transcription regulator			0.0265	ERBB2,IGF1
mir-29		microrna			0.0265	IGF1,TIMP3
niacinamide		chemical - endogenous mammalian			0.0265	CD14,CXCL12
EZH2		transcription regulator			0.0266	ERBB2,IGF1,NDRG1,TIMP3
R5020		chemical reagent			0.0276	ERBB2,TXNIP
TRAF3		enzyme			0.0276	CXCL12,NDRG1
ABCA7		transporter			0.028	CD14
AFF1		transcription regulator			0.028	IGF1
ATF5		transcription regulator			0.028	TXNIP
BMS-754807		chemical drug			0.028	ERBB2
FTO		enzyme			0.028	IGF1
HSD11B2		enzyme			0.028	TSC22D3
KCNN4		ion channel			0.028	TSC22D3
NQO2		enzyme			0.028	CXCL12
Sox2ot		other			0.028	ALDH1A1
TAF5		transcription regulator			0.028	IGF1
candesartan cilexetil		chemical drug			0.028	SOD3
SLC13A1		transporter			0.0281	ALDH1A1,IGF1
Growth hormone		group			0.0285	GSTM1,IGF1,TXNIP
AG490		chemical - kinase inhibitor			0.0287	ICOS,IGF1
erlotinib		chemical drug			0.0287	CD14,IGFBP7
streptozocin		chemical drug			0.0292	IGF1,SOD3,TXNIP
PDLIM2		other			0.0293	GSTM1,TXNIP
GW9662		chemical reagent			0.0299	CD14,MID1IP1
mir-210		microrna			0.0299	CXCL12,NDRG1
TO-901317		chemical reagent			0.0301	IGF1,MID1IP1,TIMP3
GATA2		transcription regulator		0	0.0302	CXCL12,HHEX,ICOS,IGFBP7
EHF		transcription regulator			0.0304	BLNK,ERBB2
OGT		enzyme			0.0304	CHST8,DTNA
2,2-bis(4-hydroxyphenyl)-1,1,1-trichloroethane		chemical - endogenous mammalian			0.0308	IGF1
COL17A1		other			0.0308	NFATC4
DHTKD1		enzyme			0.0308	IGF1
ELK3		transcription regulator			0.0308	ERBB2
HTR2B		g-protein coupled receptor			0.0308	ERBB2
PIKFYVE		kinase			0.0308	ALDH1A1
mGluR		group			0.0308	ERBB2
miR-208a-3p (and other miRNAs w/seed UAAGACG)		mature microrna			0.0308	CD14
trestolone		chemical drug			0.0308	IGF1
tyrphostin AG 1296		chemical - kinase inhibitor			0.0308	CD14
CDK19		kinase			0.031	BAIAP2,TXNIP
NCOR1		transcription regulator			0.031	FXYD3,NDRG1
flutamide		chemical drug			0.031	GSTM1,IGF1
INSR		kinase			0.0313	ARL4A,ICOS,IGF1,NDRG1
indomethacin		chemical drug			0.0314	CD14,CP,IGF1
STAT3		transcription regulator	Activated	2.2	0.0315	ALDH1A1,ICOS,NDRG1,RRAS2,SLC39A10
NFAT5		transcription regulator			0.0322	IGFBP7,SLC6A6
RGS2		enzyme			0.0322	CXCL12,FXYD3
gentamicin		chemical drug			0.0328	ALDH1A1,CSRP2,HIVEP2
lenalidomide		chemical drug			0.0328	BLNK,CTTNBP2,DTNA
CEBPD		transcription regulator			0.0334	CD14,IGF1
ACO1		enzyme			0.0335	IGF1
CDON		other			0.0335	TIMP3
CLEC1B		transmembrane receptor			0.0335	CXCL12
Col17a1		other			0.0335	NFATC4
LAMTOR1		other			0.0335	ICOS
LY-2510924		biologic drug			0.0335	CD14
MZF1		transcription regulator			0.0335	SOD3
NAD+		chemical - endogenous mammalian			0.0335	TXNIP
NPY2R		g-protein coupled receptor			0.0335	IGF1
PTGIR		g-protein coupled receptor			0.0335	CXCL12
RASGRF1		other			0.0335	IGF1
SOX2-OT		other			0.0335	ALDH1A1
STAT1/3/5 dimer		complex			0.0335	TIMP3
catecholamine		chemical - other			0.0335	ERBB2
mir-379		microrna			0.0335	TXNIP
toremifene		chemical drug			0.0335	ERBB2
zalcitabine		chemical drug			0.0335	CXCL12
N-cor		group			0.034	HIVEP2,IGF1
F2R		g-protein coupled receptor			0.0346	CXCL12,IGFBP7
SOD2		enzyme			0.0346	CTBP2,ICOS
CD3		complex			0.0348	FMO3,ICOS,IGF1,SYAP1,SYT7
IKZF1		transcription regulator			0.0348	BLNK,IGF1,TXNIP
CGA		other			0.0352	SCX,TIMP3
LHX1		transcription regulator			0.0352	HHEX,SLC16A12
IL13		cytokine		0.831	0.0357	CD14,CP,FXYD3,IGF1
TCF12		transcription regulator			0.0359	BLNK,ICOS
ATXN3		peptidase			0.0363	CXCL12
CDC37		other			0.0363	ERBB2
CDK7		kinase			0.0363	CTBP2
EN1		transcription regulator			0.0363	ALDH1A1
FRS2		other			0.0363	ERBB2
KMT2A-AFF1		fusion gene/product			0.0363	IGFBP7
MIA-602		chemical reagent			0.0363	IGF1
PA2G4		transcription regulator			0.0363	ERBB2
PHA-666859		chemical - kinase inhibitor			0.0363	CRYAB
RBP1		transporter			0.0363	ALDH1A1
RNF40		enzyme			0.0363	CXCL12
VEGFD		growth factor			0.0363	ADAM33
digoxin		chemical drug			0.0363	NDRG1
hormone		chemical drug			0.0363	IGF1
miR-101-3p (and other miRNAs w/seed ACAGUAC)		mature microrna			0.0363	ICOS
NFkB (complex)		complex			0.0364	CXCL12,ERBB2,ICOS,RRAS2,SOD3
CCN2		growth factor			0.0365	IGF1,TIMP3
potassium chloride		chemical drug			0.0365	IGF1,TXNIP
propylthiouracil		chemical drug			0.0377	FMO3,IGF1
NR1I3		ligand-dependent nuclear receptor			0.0384	ALDH1A1,GSTM1
uranyl nitrate		chemical toxicant			0.0384	IGFBP7,NDRG1
DANCR		other			0.039	TIMP3
GADD45B		other			0.039	BGN
SOCS2		other			0.039	IGF1
TFAP2B		transcription regulator			0.039	ERBB2
cetrorelix		biologic drug			0.039	ANXA5
estrone		chemical - endogenous mammalian			0.039	IGF1
muromonab-CD3		biologic drug			0.039	ICOS
nickel chloride		chemical toxicant			0.039	NDRG1
FOXO4		transcription regulator			0.039	IGFBP7,TXNIP
PI3K (family)		group			0.041	CXCL12,TXNIP
mir-1		microrna			0.041	CXCL12,IGF1
ATP		chemical - endogenous mammalian			0.0416	CD14,TXNIP
HOXC9		transcription regulator			0.0417	TIMP3
N-ethyl-N-nitrosourea		chemical toxicant			0.0417	GSTM1
SMC3		other			0.0417	CXCL12
TGFBR3		kinase			0.0417	ALDH1A1
THRAP3		transcription regulator			0.0417	TXNIP
cyproterone acetate		chemical drug			0.0417	IGF1
hydroxyflutamide		chemical drug			0.0417	IGF1
miR-128-3p (and other miRNAs w/seed CACAGUG)		mature microrna			0.0417	TXNIP
zinc protoporphyrin IX		chemical - endogenous mammalian			0.0417	IGF1
calcimycin		chemical reagent			0.0423	CD14,IGF1
FOXO1		transcription regulator		-0.808	0.0424	BLNK,IGF1,IGFBP7,TXNIP
SMAD3		transcription regulator			0.0429	BGN,HHEX,TIMP3
vorinostat		chemical drug			0.0429	ERBB2,FIS1,NDRG1
HRAS		enzyme		-1	0.0435	CRIM1,CSRP2,CXCL12,RBPMS,TIMP3
fulvestrant		chemical drug			0.0437	CXCL12,IGF1,TSC22D3
LEP		growth factor			0.0441	CD14,ERBB2,IGF1,TIMP3
cholecalciferol		chemical - endogenous mammalian			0.0443	CD14,IGF1
GC-GCR dimer		complex			0.0444	TSC22D3
Gm12602		other			0.0444	CRYAB
IGFBP1		other			0.0444	IGF1
MIR101		group			0.0444	IGF1
PFKFB3		kinase			0.0444	CXCL12
S1PR3		g-protein coupled receptor			0.0444	IGF1
Stat5 dimer		complex			0.0444	IGF1
copper		chemical - endogenous mammalian			0.0444	SOD3
prostaglandin A2		chemical - endogenous non-mammalian			0.0444	IGF1
RELA		transcription regulator			0.0449	CD14,CRYAB,ERBB2,IGF1
PTP4A1		phosphatase			0.045	ANXA5,IGFBP7
SPI1		transcription regulator			0.0453	BLNK,CD14,LY6E
MLXIPL		transcription regulator			0.0463	MID1IP1,TXNIP
ARG1		enzyme			0.0472	IGF1
IL1RAP		transmembrane receptor			0.0472	CD14
ITPR1		ion channel			0.0472	ERBB2
LBP		transporter			0.0472	CD14
PCSK1		peptidase			0.0472	IGF1
PPP1R1B		phosphatase			0.0472	ERBB2
bevacizumab		biologic drug			0.0472	CXCL12
bombesin		chemical - endogenous mammalian			0.0472	C1orf116
cerulenin		chemical drug			0.0472	ERBB2
cryptotanshinone		chemical drug			0.0472	CD14
glutamyl-Se-methylselenocysteine		chemical - endogenous mammalian			0.0472	TIMP3
p85 (pik3r)		group			0.0472	NDRG1
premarin		chemical drug			0.0472	IGF1
Immunoglobulin		complex		0.469	0.0475	CD14,CXCL12,ICOS,PRDX5,TSC22D3
valproic acid		chemical drug			0.0476	PDZK1IP1,Plscr2,SEMA3C,TSC22D3
STAT5B		transcription regulator			0.0477	BAIAP2,IGF1,SLC39A10
CLDN7		other			0.0477	IGFBP7,RRAS2
resiquimod		chemical drug			0.0481	CXCL12,HHEX,HIVEP2
LIPE		enzyme			0.0484	ALDH1A1,CP
PELP1		other			0.0484	NDRG1,SYT7
LDB1		transcription regulator			0.0485	HHEX,NDRG1,TXNIP
NR3C1		ligand-dependent nuclear receptor			0.0487	CRYAB,IGF1,SEMA3C,TIMP3,TSC22D3
LMO2		transcription regulator			0.0489	HHEX,NDRG1,TXNIP
E2f		group			0.0491	IGF1,MFAP1
tributyltin		chemical reagent			0.0491	PALM3,SOD3
IL5		cytokine			0.0493	NDRG1,RBPMS,RRAS2
FGF1		growth factor			0.0498	GSTM1,TIMP3
reactive oxygen species		chemical toxicant			0.0498	ERBB2,PRDX5
BARX2		transcription regulator			0.0499	TIMP3
PLA2G4A		enzyme			0.0499	ANXA5
TAF1		transcription regulator			0.0499	IGF1
TGAL copolymer		biologic drug			0.0499	IGF1
antimycin A		chemical - endogenous non-mammalian			0.0499	TXNIP
mannitol		chemical - endogenous mammalian			0.0499	MPDZ
piperine		chemical drug			0.0499	ERBB2

## Sheet: M18_C4vC2
© 2000-2020 QIAGEN. All rights reserved.
Upstream Regulator	Expr Log Ratio	Molecule Type	Predicted Activation State	Activation z-score	p-value of overlap	Target molecules in dataset	Mechanistic Network
decitabine		chemical drug	Activated	2.121	5.29e-07	COMT,GPX1,HSPA1A/HSPA1B,IPCEF1,KLF6,KRT7,MYC,PAWR,RASSF3,SLC7A1,SPINT2,Tpm1
tetrachlorodibenzodioxin		chemical toxicant		0.563	4.28e-06	CAMK2N1,COMT,HSPA1A/HSPA1B,JUND,KRT7,MYC,NFE2L2,SLCO3A1
H1-2		other			7.86e-06	DDIT3,HSPA1A/HSPA1B,MYC
TP53		transcription regulator		0.663	1.17e-05	CAMK2N1,COMT,Crip2,DDIT3,GPRC5C,GPX1,HSPA1A/HSPA1B,JUND,KLF6,MAP4,MYC,PAWR,PCDH7,SPTLC2,STMN1,Tpm1	BRCA1,MAX,MYC,SIN3A,TNF,TP53
forskolin		chemical toxicant	Activated	2.529	1.21e-05	AKAP13,Crip2,DDIT3,GPRC5C,HSPA1A/HSPA1B,JUND,MYC,PAWR,SERINC2,WNT4
ERBB2		kinase		0.611	1.67e-05	CHMP2B,DDIT3,DUSP18,GTF3A,HSPA1A/HSPA1B,KRT7,MAP4,MYC,PTPRS,SLC7A1,SPINT2
SIN3A		transcription regulator			1.69e-05	DDIT3,KLF6,MAP4,MYC	MYC,SIN3A,TP53
SIN3B		transcription regulator			1.85e-05	DDIT3,KLF6,MYC	MAX,MYC,SIN3B,TP53
miR-30c-5p (and other miRNAs w/seed GUAAACA)		mature microrna	Inhibited	-2.213	2.5e-05	IFRD1,KRT7,NUFIP2,SLC7A1,Tpm1
amino acids		chemical - endogenous mammalian			3.59e-05	DDIT3,MYC,SLC7A1	Ap1,CTNNB1,GSK3B,MYC,amino acids
CC-122		chemical drug			5.99e-05	DDX58,MYC
MAPK8		kinase		-0.277	6.68e-05	DDIT3,JUND,KLF6,MYC,WNT4	CCNT1,EGFR,ESR1,FOS,Hdac,IGF1,Jnk,MAPK8,MYC,reactive oxygen species
vitamin K3		chemical drug			6.77e-05	DDIT3,KLF6,MYC	CCNT1,Jnk,MYC,vitamin K3
cinnamaldehyde		chemical toxicant		1.091	7.34e-05	GPX1,HSPA1A/HSPA1B,JUND,NFE2L2
6-hydroxydopamine		chemical toxicant		1.982	8e-05	DDIT3,GPX1,HSPA1A/HSPA1B,UBE2D3
lipopolysaccharide		chemical drug		1.41	8.29e-05	AKAP13,CD2AP,DDIT3,DDX58,GLIS2,HSPA1A/HSPA1B,IFRD1,JUND,KLF6,LRRC58,MYC,NFE2L2,PCDH7,SPTLC2,STMN1	BRCA1,CCNT1,E2F1,Hdac,IRF8,Jnk,MYC,PI3K (complex),TNF,TP53,lipopolysaccharide,reactive oxygen species
doxorubicin		chemical drug		0.963	0.000108	DDIT3,MAP4,MYC,NFE2L2,STMN1,Tpm1,WNT4	Ap1,CDKN1A,CTNNB1,E2F1,FOS,GSK3B,Hdac,MAX,MYC,PI3K (complex),TP53,TP73,doxorubicin
paclitaxel		chemical drug		1.4	0.000109	DDIT3,JUND,MYC,SPTLC2,STMN1,WNT4	CDKN1A,E2F1,EGFR,ESR1,FOS,Hdac,MYC,PI3K (complex),TP73,paclitaxel
FUBP1		transcription regulator			0.000125	MYC,STMN1
PDE6B		enzyme			0.000125	GPX1,NFE2L2
thapsigargin		chemical toxicant		1.937	0.000136	DDIT3,HSPA1A/HSPA1B,MYC,NFE2L2,PAWR	CCNT1,Jnk,MYC,thapsigargin
D-galactosamine		chemical - endogenous mammalian			0.000165	JUND,MYC,NFE2L2	CCNT1,D-galactosamine,Jnk,MYC
KSR1		kinase			0.000167	MYC,Tpm1
MM-401		chemical reagent			0.000167	KLF6,MYC
STAG1		other			0.000167	MYC,PCDH7
MYC	0.039	transcription regulator		0.864	0.000175	CAMK2N1,Crip2,DDIT3,Gar1,KLF6,KRT7,MAP4,MYC,NFE2L2,STMN1,Tpm1	Ap1,CCNT1,CTNNB1,GSK3B,Hdac,Jnk,MAX,MYC,SIN3A,TP53,reactive oxygen species
GNA15		enzyme			0.000177	DDIT3,MYC,PAWR,SLC7A1	GNA15,HRAS,MYC,TP53
FOXO3		transcription regulator		-0.492	0.000193	DDIT3,GPX1,MYC,PAWR,SLC7A1,SPTLC2
Jnk		group		1.977	0.000195	DDIT3,JUND,KLF6,MYC,NFE2L2	BRCA1,CCNT1,Hdac,Jnk,MAX,MYC,TNF,TP53,reactive oxygen species
arsenite		chemical toxicant			0.000196	DDIT3,HSPA1A/HSPA1B,MYC,NFE2L2	CCNT1,Hdac,Jnk,MYC,arsenite,reactive oxygen species
pentazocine		chemical drug			0.000214	GPX1,NFE2L2
quinolinic acid		chemical - endogenous mammalian			0.000216	HSPA1A/HSPA1B,JUND,MYC
IgG		complex		1.078	0.000216	DDIT3,DDX58,GPX1,JUND,MYC	BRCA1,CCNT1,IgG,Jnk,MYC,TNF,TP53
PTP4A1		phosphatase		0.577	0.000216	HSPA1A/HSPA1B,MYADM,SPINT2,STMN1
reactive oxygen species		chemical toxicant		1.965	0.000269	DDIT3,KLF6,MYC,NFE2L2	Ap1,BRCA1,CCNT1,E2F1,Hdac,Jnk,MYC,PI3K (complex),SIN3A,TNF,TP53,nitric oxide,reactive oxygen species
WT1		transcription regulator			0.000287	CD2AP,HCFC1R1,JUND,MYC,WNT4
dimethyl sulfoxide		chemical drug		0.747	0.000303	DDIT3,JUND,MYC,Tpm1	MYC,SIN3A,TP53,dimethyl sulfoxide
PTEN		phosphatase		1.373	0.00032	GPRC5C,HSPA1A/HSPA1B,IFRD1,JUND,KLF6,MYC,PRMT2,WNT4
gentamicin		chemical drug	Activated	2.219	0.000354	DDIT3,HSPA1A/HSPA1B,IFRD1,KLF6,MYC
S-nitroso-N-acetyl-DL-penicillamine		chemical reagent			0.000382	DDIT3,HSPA1A/HSPA1B,MYC	Ap1,S-nitroso-N-acetyl-DL-penicillamine,nitric oxide
CCNT1		transcription regulator			0.000391	DDIT3,MYC
Mt		group			0.000391	DDIT3,NFE2L2	Ap1,CCNT1,Jnk,MYC,Mt,NFE2L2,arsenic trioxide
azetidyl-2-carboxylic acid		chemical reagent			0.000391	DDIT3,HSPA1A/HSPA1B
methapyrilene		chemical drug	Activated	2	0.000391	DDIT3,IFRD1,MYC,STMN1
IRF8		transcription regulator			0.000413	DDX58,KLF6,MYC,PCDH7	BRCA1,IRF8,TNF,TP53
cadmium chloride		chemical toxicant			0.000445	DDIT3,MYC,NFE2L2
CD40LG		cytokine	Activated	2.2	0.000452	AKAP13,DCTN1,HSPA1A/HSPA1B,JUND,MYC,PAWR
Cd2+		chemical toxicant			0.000538	DDIT3,MYC	Cd2+,FOS,IGF1
carfilzomib		biologic drug			0.000538	DDIT3,MYC	26s Proteasome,BRCA1,CCNT1,CDK9,Jnk,MYC,carfilzomib
3-deazaneplanocin		chemical drug			0.000538	KLF6,KRT7,MYC
TNFSF11		cytokine		1.98	0.000542	AKAP13,IFRD1,MYC,PCDH7,STMN1
48s		complex			0.000619	DDIT3,MYC
APBB1		transcription regulator			0.000619	MYC,Tpm1
SPTLC2	0.037	enzyme			0.000619	DDIT3,SPTLC2
bromobenzene		chemical toxicant			0.000699	DDIT3,JUND,MYC
clopidogrel		chemical drug			0.000699	DDIT3,IFRD1,MYC
CBX4		transcription regulator			0.000707	MYC,WNT4
cisplatin		chemical drug	Activated	2.132	0.000726	DDIT3,DDX58,JUND,MYC,PAWR,STMN1,Tpm1,WNT4	E2F1,EGFR,ESR1,Hdac,TP73,cisplatin
2-deoxyglucose		chemical drug			0.000729	DDIT3,GPX1,MYC	2-deoxyglucose,Ap1,CTNNB1,FOXO3,GSK3B,MYC
nitrofurantoin		chemical drug		1	0.000763	DDIT3,IFRD1,MYC,STMN1
IL4		cytokine		1.436	0.000764	AKAP13,DCTN1,HSPA1A/HSPA1B,JUND,KLF6,MAP4,MYC,PAWR,SPINT2
Hdac		group		-1	0.00078	DDIT3,KLF6,MYC,WNT4	Hdac,SIN3A,TP53
MXI1		transcription regulator			0.000799	MYC,SLC7A1
RPS6KA3		kinase			0.000898	DDIT3,MYC	CCNT1,Jnk,MYC,RPS6KA3
fenretinide		chemical drug			0.000995	DDIT3,MYC,NFE2L2
CREBZF		transcription regulator			0.001	DDIT3,HSPA1A/HSPA1B
DPP-23		chemical reagent			0.001	DDIT3,HSPA1A/HSPA1B
MNT		transcription regulator			0.001	DDIT3,KLF6
BRCA1		transcription regulator			0.00103	DDIT3,DDX58,MYC,NFE2L2	BRCA1,CCNT1,Hdac,Jnk,MYC,reactive oxygen species
N-Ac-Leu-Leu-norleucinal		chemical - protease inhibitor			0.00103	DDIT3,PAWR,STMN1
acetaminophen		chemical drug		0.686	0.0011	DDIT3,GPX1,IFRD1,MYC	BRCA1,FOS,Hdac,NFE2L2,TP73,acetaminophen,hydrogen peroxide
ADRB1		g-protein coupled receptor			0.00111	DDIT3,Tpm1
PTP4A3		phosphatase			0.00111	MYC,STMN1
ETV6-RUNX1		fusion gene/product		-1.192	0.00111	JUND,KLF6,MYC,PRMT2,STMN1
15-deoxy-delta-12,14 -PGJ 2		chemical - endogenous mammalian		-0.45	0.00114	DDIT3,DDX58,MYC,NFE2L2	15-deoxy-delta-12,14 -PGJ 2,Ap1,BRCA1,CCNT1,E2F1,Jnk,MYC,PI3K (complex),TNF,TP53,nitric oxide
TP63		transcription regulator		-0.192	0.00121	CTXN1,KLF6,KRT7,MYC,STMN1,WNT4
3,4,5,3',4'-pentachlorobiphenyl		chemical toxicant			0.00123	COMT,HSPA1A/HSPA1B,SLCO3A1
PRKCD		kinase		0.762	0.00126	DDIT3,KLF6,MYC,RYBP	CCNT1,Jnk,MYC,PRKCD
PIK3R1		kinase			0.00127	DDIT3,MYC,NFE2L2	CCNT1,E2F1,Jnk,MYC,PI3K (complex),PIK3R1
MAPK3		kinase			0.00131	JUND,MYC,NFE2L2
PDGF BB		complex		0.638	0.00133	DDIT3,KLF6,MYC,PAWR,SLC7A1	CCNT1,FOXO3,Hdac,Jnk,MYC,PDGF BB,reactive oxygen species
JUN		transcription regulator			0.00134	COMT,Crip2,MYC,SLC7A1,STMN1,WNT4	CDKN1A,FOS,JUN
Ige		complex		1	0.00137	CDC42EP5,Crip2,MYC,PTPRS,Tpm1
HRAS		enzyme			0.00138	Crip2,DDIT3,KLF6,MYC,PAWR,PTPRS,Tpm1	HRAS,MAX,MYC,SIN3A,TP53
FADD		other			0.0014	DDX58,KLF6,MYC
MAX		transcription regulator			0.0014	DDIT3,KLF6,MYC
E2F1		transcription regulator		1.686	0.00147	CD2AP,DDIT3,MYC,PAWR,RYBP,STMN1
SGPL1		enzyme			0.00147	DDIT3,DDX58
TUG1		other			0.00147	DDIT3,MYC
trans-cinnamaldehyde		chemical drug			0.00147	DDIT3,NFE2L2	Ap1,nitric oxide,trans-cinnamaldehyde
EGFR		kinase		0.084	0.00148	DDIT3,JUND,MYC,PTPRS,SLC7A1,WNT4	EGFR,ESR1,JUN,PGR
lactacystin		chemical - protease inhibitor		1.964	0.00149	DDIT3,IFRD1,NFE2L2,STMN1
Sos		group			0.00158	KLF6,NFE2L2,STMN1,Tpm1	FOXO3,KRAS,MAX,MYC,Sos,TP53
Mek		group			0.00158	DDX58,MYC,PTPRS,SLC7A1,Tpm1
2-aminopurine		chemical reagent			0.0016	DDIT3,DDX58
LCAT		enzyme			0.0016	DDIT3,MYC
PLD1		enzyme			0.0016	DDIT3,MYC	FOS,Hdac,IGF1,PLD1,reactive oxygen species
vanillin		chemical - endogenous non-mammalian			0.0016	HSPA1A/HSPA1B,JUND
zerumbone		chemical - endogenous non-mammalian			0.0016	DDIT3,MYC
hydrogen peroxide		chemical - endogenous mammalian		1.82	0.00166	DDIT3,GPX1,MYC,NFE2L2,STMN1,WNT4	BRCA1,D-glucose,E2F1,FOS,FOXO3,Hdac,MYC,NFE2L2,PI3K (complex),TP73,doxorubicin,hydrogen peroxide
TGFB1		growth factor		0.171	0.00168	CAMK2N1,HSPA1A/HSPA1B,IFRD1,JUND,KRT7,MAP4,MYC,RYBP,SLC7A1,SPPL2A,Tpm1,WNT4	ESR1,JUN,PGR,TGFB1
alpha-tocopherol		chemical drug			0.00174	HSPA1A/HSPA1B,JUND
dibutyl phthalate		chemical toxicant			0.00174	MYC,NFE2L2
EIF2AK2		kinase			0.00185	DDIT3,DDX58,MYC	Ap1,CTNNB1,EIF2AK2,GSK3B,MYC
TNF		cytokine		1.453	0.00191	CDC42EP5,DDIT3,DDX58,GPX1,HSPA1A/HSPA1B,JUND,KLF6,MYC,NFE2L2,PCDH7,SLC7A1,STMN1	BRCA1,CCNT1,D-glucose,E2F1,FOS,FOXO3,Hdac,Jnk,MYC,NFE2L2,PI3K (complex),TNF,TP73,hydrogen peroxide,reactive oxygen species
FN1		enzyme			0.00191	GPX1,JUND,KRT7,MYC
curcumin		chemical drug		0.796	0.002	DDIT3,HSPA1A/HSPA1B,JUND,MYC,NFE2L2	Ap1,BRCA1,CCNT1,E2F1,Jnk,MAX,MYC,PI3K (complex),PI3K (family),TNF,TP53,curcumin,nitric oxide
MKNK1		kinase			0.00202	DCTN1,IFRD1,MYC
CPE		peptidase			0.00203	DDIT3,MYC
NCL		other			0.00203	HSPA1A/HSPA1B,MYC
THPO		cytokine			0.00207	DDX58,MYC,NFE2L2
TAZ		enzyme			0.00213	CAMK2N1,KLF6,MYC
caffeic acid phenethyl ester		chemical drug			0.00231	DDIT3,KLF6,NFE2L2	Ap1,CCNT1,Hdac,Jnk,MYC,caffeic acid phenethyl ester,nitric oxide,reactive oxygen species
potassium chloride		chemical drug			0.00231	DDIT3,MYC,SLC7A1	Ap1,CTNNB1,GSK3B,MYC,potassium chloride
vismodegib		chemical drug			0.00234	GPX1,NFE2L2
glutamine		chemical - endogenous mammalian			0.00238	DDIT3,HSPA1A/HSPA1B,MYC	Ap1,glutamine
3-methoxyapigenin		chemical - endogenous non-mammalian			0.00248	MYC
ACS-1		chemical reagent			0.00248	MYC
ANTXR1		transmembrane receptor			0.00248	HSPA1A/HSPA1B
AZD5438		chemical drug			0.00248	DDIT3
Ahr-aryl hydrocarbon-RelA		complex			0.00248	MYC
BRD4-NUTM1		fusion gene/product			0.00248	MYC
BW-755C		chemical drug			0.00248	JUND
CDC45		other			0.00248	MYC
CDKI AT7519		chemical drug			0.00248	DDIT3
CNOT9		other			0.00248	MYC
Cdk9 inhibitor II		chemical reagent			0.00248	DDIT3
EAF1		transcription regulator			0.00248	WNT4
GLIPR1		other			0.00248	MYC
GS-626510		chemical reagent			0.00248	MYC
GSK1059615		chemical drug			0.00248	DDIT3
KRT7-AS		other			0.00248	KRT7
LDC067		chemical - kinase inhibitor			0.00248	DDIT3
LRRC4		other			0.00248	STMN1
MAN2C1		enzyme			0.00248	DDIT3
NMS-873		chemical reagent			0.00248	MYC
NSMCE3		other			0.00248	MYC
PF-4800567		chemical - kinase inhibitor			0.00248	MYC
PHA-767491		chemical - kinase inhibitor			0.00248	DDIT3
PPP2R3A		phosphatase			0.00248	MYC
PRDM2		transcription regulator			0.00248	MYC
PRSS1		peptidase			0.00248	DDIT3
RBMS1		other			0.00248	MYC
RPL21		other			0.00248	MYC
RPS20		other			0.00248	MYC
SLC25A27		transporter			0.00248	DDIT3
SLK		kinase			0.00248	DDIT3
SU11333		chemical - kinase inhibitor			0.00248	MYC
SU6657		chemical - kinase inhibitor			0.00248	MYC
Sin3b		transcription regulator			0.00248	MYC
TCAM1P		other			0.00248	DDIT3
TCF4-CTNNβ		complex			0.00248	MYC
TRNAU1AP		other			0.00248	GPX1
UBE2L6		enzyme			0.00248	DDX58
ZBTB14		transcription regulator			0.00248	MYC
anti-miR-185-5p		chemical reagent			0.00248	DDIT3
fostamatinib		chemical drug			0.00248	PAWR
imidazolo-oxindole PKR inhibitor C16		chemical reagent			0.00248	DDIT3
mir-1301		microrna			0.00248	KLF6
mir-363		microrna			0.00248	MYC
pubchem compound 353999		chemical reagent			0.00248	MYC
tolcapone		chemical drug			0.00248	COMT
dithiothreitol		chemical reagent			0.00251	DDIT3,MYC	CCNT1,E2F1,Jnk,MYC,PI3K (complex),dithiothreitol
plerixafor		chemical drug			0.00251	GPX1,NFE2L2
puromycin aminonucleoside		chemical reagent			0.00257	CD2AP,MYC,Tpm1
EPAS1		transcription regulator			0.00261	CDC42EP5,CHMP2B,DDIT3,GPX1
Ubiquitin		group			0.00267	DDIT3,MYC	BRCA1,Ubiquitin
crocidolite asbestos		chemical toxicant			0.00267	JUND,MYC
proteasome inhibitor PSI		chemical - protease inhibitor			0.00267	DDIT3,NFE2L2
PI3K (family)		group			0.00278	DDIT3,MYC,NFE2L2	Ap1,CTNNB1,GSK3B,MAX,MYC,PI3K (family),TP53
mir-193		microrna			0.00285	CD2AP,STMN1
FOS		transcription regulator			0.003	KLF6,MYC,NFE2L2,STMN1,Tpm1,WNT4	FOS,MAX,MYC,TP53
KRAS		enzyme		0.179	0.00307	DDIT3,KLF6,MYC,NFE2L2,PAWR,SLC7A1,Tpm1	CCNT1,E2F1,FOXO3,Hdac,Jnk,KRAS,MAX,MYC,PI3K (complex),TP53,reactive oxygen species
DDIT3	0.022	transcription regulator			0.00314	CAMK2N1,DDIT3,NFE2L2
EZR		other			0.00321	DDIT3,MYC	CCNT1,E2F1,EZR,Jnk,MYC,PI3K (complex)
IGF2BP1		translation regulator			0.00321	DDIT3,MYC
PLAT		peptidase			0.00321	DDIT3,MYC
bafilomycin A1		chemical drug			0.00321	DDIT3,SLC7A1
SU6656		chemical toxicant			0.0034	DDIT3,MYC
TP73		transcription regulator		-0.271	0.00341	DDIT3,HSPA1A/HSPA1B,MYC,STMN1,WNT4	CDKN1A,FOS,Hdac,SIN3A,TP73
GSK3B		kinase			0.00344	DDIT3,MAP4,MYC	Ap1,CTNNB1,GSK3B,MAX,MYC,TP53
thioacetamide		chemical toxicant			0.00356	MYC,NFE2L2,PTPRS,Tpm1
TFDP1		transcription regulator			0.00359	MYC,STMN1
arginine		chemical - endogenous mammalian			0.00359	DDIT3,MYC	Ap1,E2F1,FOS,IGF1,MYC,PI3K (complex),arginine,nitric oxide
mercuric chloride		chemical toxicant			0.00359	DDIT3,HSPA1A/HSPA1B
PELP1		other			0.00361	CDC42EP5,MYADM,MYC
estrogen receptor		group			0.00371	HSPA1A/HSPA1B,KRT7,MYC,PCDH7
FGF1		growth factor			0.00377	GPX1,MYC,NFE2L2
tanespimycin		chemical drug			0.00377	DDIT3,HSPA1A/HSPA1B,MYC	CCNT1,CDK9,tanespimycin
parthenolide		chemical drug			0.004	DDIT3,NFE2L2	Hdac,NFE2L2,parthenolide,reactive oxygen species
SOD1		enzyme			0.00414	COMT,NFE2L2,PAWR,STMN1
ethionine		chemical toxicant			0.00421	MYC,Tpm1
miR-34a-5p (and other miRNAs w/seed GGCAGUG)		mature microrna			0.00439	MYC,SLCO3A1,SPINT2
CDKN1A		kinase			0.00448	HSPA1A/HSPA1B,MYC,STMN1,WNT4	CDKN1A,FOS,MYC
NRG1		growth factor			0.00454	DDIT3,JUND,MYC,STMN1	CCNT1,E2F1,EGFR,ESR1,Jnk,MYC,NRG1,PI3K (complex)
fulvestrant		chemical drug		-1.172	0.00484	COMT,MYC,STMN1,WNT4	CDKN1A,FOS,fulvestrant
2,5-di-tert-butylhydroquinone		chemical toxicant			0.00495	DDIT3
3-hydroxyflavone		chemical - endogenous non-mammalian			0.00495	HSPA1A/HSPA1B
3-iodobenzylguanidine		chemical drug			0.00495	MYC
5-iodotubercidin		chemical - kinase inhibitor			0.00495	DDIT3
5-oxo-6-8-11-14-(e,z,z,z)-eicosatetraenoic acid		chemical - endogenous mammalian			0.00495	MYC
AMD1		enzyme			0.00495	MYC
BCAS3		other			0.00495	MYC
CCDC88C		other			0.00495	MYC
CCNT2		transcription regulator			0.00495	DDIT3
CELA1		peptidase			0.00495	HSPA1A/HSPA1B
CENPX		other			0.00495	MYC
CSDE1		enzyme			0.00495	MYC
CTNNβ-LEF1		complex			0.00495	MYC
Cofilin		group			0.00495	MYC
DST		other			0.00495	DDIT3
GJD2		other			0.00495	DDIT3
Gm-Csf Receptor		complex			0.00495	MYC
IMPACT		other			0.00495	DDIT3
KRT18		other			0.00495	KRT7
LPCAT1		enzyme			0.00495	DDIT3
Mia2		other			0.00495	DDIT3
NCEH1		enzyme			0.00495	DDIT3
NDUFS1		enzyme			0.00495	GPX1
NOSIP		other			0.00495	MYC
OMG		g-protein coupled receptor			0.00495	MYC
PPP2R5A		phosphatase			0.00495	MYC
PTPA		phosphatase			0.00495	MYC
RAMAC		other			0.00495	MYC
RBM3		other			0.00495	DDIT3
RBMS3		other			0.00495	MYC
RP11_598D141		other			0.00495	DDIT3
RPA2		other			0.00495	MYC
RPL15		other			0.00495	MYC
RPRD1B		other			0.00495	MYC
RPS25		other			0.00495	MYC
SGF29		other			0.00495	DDIT3
SPTLC1		enzyme			0.00495	SPTLC2
STAM		other			0.00495	MYC
STAMBP		enzyme			0.00495	MYC
STYX		phosphatase			0.00495	MYC
TRIM71		enzyme			0.00495	MYC
USP36		peptidase			0.00495	MYC
WASHC1		other			0.00495	MYC
butylbenzyl phthalate		chemical toxicant			0.00495	MYC
butyrine		chemical - endogenous mammalian			0.00495	MYC
dibromoacetic acid		chemical toxicant			0.00495	MYC
kenpaullone		chemical reagent			0.00495	DDIT3
lonaprisan		chemical drug			0.00495	MYC
miR-185-3p (and other miRNAs w/seed GGGGCUG)		mature microrna			0.00495	MYC
mir-105		microrna			0.00495	MYC
mir-331		microrna			0.00495	MYC
phenoxyacetic acid		chemical reagent			0.00495	MYC
terpenoid		chemical - endogenous mammalian			0.00495	NFE2L2
retinoid		chemical drug			0.00509	GTF3A,MYC
quercetin		chemical drug			0.00516	COMT,MYC,NFE2L2	Ap1,nitric oxide,quercetin
NFE2L2	0.13	transcription regulator		0.882	0.0052	DDIT3,GPX1,IFRD1,NFE2L2,Tpm1
resiquimod		chemical drug			0.00555	DDIT3,GPX1,NFE2L2,STMN1	BRCA1,TNF,TP53,resiquimod
ACOX1		enzyme			0.00558	DDIT3,KLF6,NFE2L2
geldanamycin		chemical - endogenous non-mammalian			0.00562	BRI3,HSPA1A/HSPA1B,MYC,SPINT2
PRKACA		kinase			0.00581	HSPA1A/HSPA1B,MYC
D-glucose		chemical - endogenous mammalian		0.29	0.00592	DDIT3,GPX1,MYC,NFE2L2,SLC7A1,Tpm1	Ap1,BRCA1,D-glucose,FOXO3,MAX,MYC,NFE2L2,PI3K (family),TNF,TP53,nitric oxide
beta-estradiol		chemical - endogenous mammalian		1.427	0.00614	COMT,DDIT3,Gar1,GPX1,IFRD1,JUND,KLF6,KRT7,MYC,NFE2L2,RYBP,WNT4	CCNT1,ESR1,FOS,IGF1,JUN,Jnk,MYC,PGR,beta-estradiol
HNRNPK		transcription regulator			0.00631	MYC,NFE2L2
26s Proteasome		complex			0.00636	DDIT3,DDX58,MYC	26s Proteasome,BRCA1,CCNT1,CDK9,Ubiquitin
PI3K (complex)		complex		1.016	0.0064	DDIT3,MYC,NFE2L2,STMN1	Ap1,BRCA1,CCNT1,Hdac,Jnk,MAX,MYC,PI3K (complex),TNF,TP53,nitric oxide,reactive oxygen species
trichostatin A		chemical drug		0.956	0.0065	IPCEF1,JUND,MAP4,MYC,RASSF3,SLC7A1,STMN1
resveratrol		chemical drug			0.00656	DDIT3,GPX1,JUND,MYC	BRCA1,CCNT1,EGFR,ESR1,FOS,Hdac,Jnk,MYC,TNF,TP53,TP73,beta-estradiol,hydrogen peroxide,resveratrol
PGR		ligand-dependent nuclear receptor			0.00671	AKAP13,COMT,MYC,WNT4	CTNNB1,PGR
PNPT1		enzyme			0.00683	DDX58,MYC
fluocinolone acetonide		chemical drug			0.00683	JUND,WNT4
IGF1		growth factor	Activated	2.116	0.00696	DDIT3,KLF6,MYC,NFE2L2,WNT4	BRCA1,CCNT1,ESR1,FOS,Hdac,IGF1,Jnk,MAX,MYC,PI3K (family),TP73,beta-estradiol,hydrogen peroxide
ERK1/2		group		1.982	0.00702	CDC42EP5,DDIT3,JUND,MYC	BRCA1,CCNT1,EGFR,ERK1/2,ESR1,Jnk,MYC,TNF,TP53
BRD2		kinase			0.0071	MYC,PAWR
IFNA4		cytokine			0.0071	MYC,SLCO3A1
nitric oxide		chemical - endogenous mammalian			0.00732	DDIT3,MYC,NFE2L2	BRCA1,CCNT1,D-glucose,E2F1,FOS,FOXO3,Hdac,Jnk,MYC,NFE2L2,PI3K (complex),TP73,hydrogen peroxide,nitric oxide,reactive oxygen species
ESR1		ligand-dependent nuclear receptor		0.44	0.00732	AKAP13,COMT,IFRD1,JUND,KRT7,MYC,SLC7A1,SPTLC2,WNT4	CTNNB1,ESR1,JUN,PGR
2,3,4,7,8-pentachlorodibenzofuran		chemical toxicant			0.00737	COMT,HSPA1A/HSPA1B
RTN4		other			0.00737	JUND,Tpm1
(E)-1-(2-nitrovinyl)naphthalene		chemical reagent			0.00741	MYC
(E)-9-(2-nitrovinyl)anthracene		chemical reagent			0.00741	MYC
2,2-dimethylbutyric acid		chemical drug			0.00741	MYC
ADI PEG20		biologic drug			0.00741	MYC
AHNAK		other			0.00741	MYC
ANKRD1		transcription regulator			0.00741	DDIT3
ASS1		enzyme			0.00741	MYC
ATAD2		enzyme			0.00741	MYC
ATF7IP		transcription regulator			0.00741	JUND
AVI-4126		biologic drug			0.00741	MYC
BCKDHA		enzyme			0.00741	MYC
BPTF		transcription regulator			0.00741	MYC
CNOT1		other			0.00741	MYC
DHPS		enzyme			0.00741	DDIT3
DOK2		other			0.00741	MYC
EDEM1		enzyme			0.00741	DDIT3
EEF1A1		translation regulator			0.00741	MYC
EIF2B1		translation regulator			0.00741	DDIT3
EIF4F		complex			0.00741	MYC
ELL		transcription regulator			0.00741	MYC
FOXO6		transcription regulator			0.00741	MYC
GPC3		other			0.00741	MYC
H1-3		other			0.00741	MYC
HNRNPF		other			0.00741	NFE2L2
LZTS2		other			0.00741	MYC
MED26		transcription regulator			0.00741	MYC
Mir124a-1hg		other			0.00741	DDIT3
NCOA5		other			0.00741	MYC
NIBAN2		transcription regulator			0.00741	MYC
NPHS2		other			0.00741	CD2AP
PLC gamma		group			0.00741	MYC
PURB		transcription regulator			0.00741	MYC
PVT1		other			0.00741	MYC
Pdi		group			0.00741	DDIT3
R191		chemical - kinase inhibitor			0.00741	MYC
RGS3		enzyme			0.00741	MYC
RPL23A		other			0.00741	MYC
RPS14		translation regulator			0.00741	MYC
SGI 1776		chemical drug			0.00741	MYC
SRGAP1		other			0.00741	MYC
STAM2		other			0.00741	MYC
STRAP		other			0.00741	MYC
TOR2A		other			0.00741	MYC
TRAF7		enzyme			0.00741	MYC
ZNF300		transcription regulator			0.00741	MYC
lopinavir		chemical drug			0.00741	DDIT3
miR-2682-5p (and other miRNAs w/seed AGGCAGU)		mature microrna			0.00741	MYC
mir-383		microrna			0.00741	MYC
sethoxydim		chemical toxicant			0.00741	MYC
thioguanine		chemical drug			0.00741	MYC
trimethyloxamine		chemical - endogenous non-mammalian			0.00741	DDIT3
umbralisib		chemical drug			0.00741	MYC
INS		other			0.0077	DDIT3,JUND,NFE2L2	Ap1,CCNT1,INS,Jnk,MYC,nitric oxide
MAPK9		kinase			0.00783	JUND,KLF6,MYC	CCNT1,Jnk,MAPK9,MYC
UCP1		transporter			0.00783	DDIT3,DDX58,MYC
EIF2S1		translation regulator			0.00793	DDIT3,IFRD1
GRB2		other			0.00793	KRT7,SLC7A1
JAG1		growth factor			0.00793	MYC,WNT4
NUPR1		transcription regulator	Activated	2.236	0.00821	CAMK2N1,DDIT3,KLF6,MYC,RYBP
CDK9		kinase			0.00822	DDIT3,MYC	CCNT1,CDK9
Ap1		complex			0.0085	DDIT3,IFRD1,MYC
SNCA		enzyme			0.00863	CTXN1,DCTN1,DDIT3,MAP4
CTNNB1		transcription regulator		1.951	0.00869	AKAP13,DDIT3,KRT7,MAP4,MTMR7,MYC,WNT4
raloxifene		chemical drug			0.00877	HSPA1A/HSPA1B,KLF6,KRT7
hexachlorobenzene		chemical toxicant			0.00881	MYC,Tpm1
mir-204		microrna			0.00881	DDIT3,MYC
arsenic trioxide		chemical drug			0.00909	DDIT3,IFRD1,MYC,NFE2L2	Ap1,BRCA1,CCNT1,FOS,Hdac,Jnk,MYC,NFE2L2,TP73,arsenic trioxide,hydrogen peroxide,reactive oxygen species
GPER1		g-protein coupled receptor			0.00911	DDIT3,MYC	E2F1,GPER1,MYC,PI3K (complex)
N-methyl-D-aspartate		chemical drug			0.00911	MYC,SLC7A1
docosahexaenoic acid		chemical drug			0.0092	DDIT3,MYC,NFE2L2	CCNT1,Hdac,Jnk,MYC,docosahexaenoic acid,reactive oxygen species
thioctic acid		chemical drug			0.00972	MYC,NFE2L2	CCNT1,Jnk,MYC,thioctic acid
1-(2-hydroxy-5-methylphenyl)-3-phenyl-1,3-propanedione		chemical reagent			0.00987	DDIT3
2,4-diamino-6-hydroxypyrimidine		chemical reagent			0.00987	NFE2L2
5,6,7,8-tetrahydrobiopterin		chemical - endogenous mammalian			0.00987	MYC
ACP1		phosphatase			0.00987	MYC
ATF6B		transcription regulator			0.00987	DDIT3
ATP2A1		transporter			0.00987	DDIT3
C8orf44-SGK3/SGK3		kinase			0.00987	DDIT3
CCDC88B		enzyme			0.00987	DDIT3
CCI-007		chemical reagent			0.00987	MYC
CDC25B		phosphatase			0.00987	MYC
DACT3		other			0.00987	MYC
DEETGE-CAL-Tat		chemical reagent			0.00987	GPX1
EIF3I		translation regulator			0.00987	MYC
Esr1-Esr1-estrogen-estrogen		complex			0.00987	MYC
FICD		enzyme			0.00987	HSPA1A/HSPA1B
G0S2		other			0.00987	MYC
GPR65		g-protein coupled receptor			0.00987	MYC
HERPUD1		other			0.00987	DDIT3
HSPBP1		other			0.00987	HSPA1A/HSPA1B
HSPH1		other			0.00987	MYC
HUNK		kinase			0.00987	MYC
L3MBTL2		transcription regulator			0.00987	DDIT3
LIMK1		kinase			0.00987	MYC
MAD1L1		other			0.00987	MYC
MS645		chemical reagent			0.00987	MYC
N-butyldeoxynojirimycin		chemical drug			0.00987	PAWR
NME2		kinase			0.00987	MYC
NPSR1		g-protein coupled receptor			0.00987	MYC
Nc2		complex			0.00987	MYC
OSU-CG12		chemical reagent			0.00987	KLF6
PD 180970		chemical - kinase inhibitor			0.00987	MYC
RAB7		group			0.00987	MYC
RPL5		other			0.00987	MYC
SLC9A3R2		transporter			0.00987	MYC
SNRK		kinase			0.00987	MYC
TCF20		transcription regulator			0.00987	MYC
TOP2A		enzyme			0.00987	MYC
USE1		other			0.00987	DDIT3
WNT9B		other			0.00987	WNT4
XRN2		enzyme			0.00987	MYC
abrocitinib		chemical drug			0.00987	MYC
alpha-methylhydrocinnamic acid		chemical - endogenous mammalian			0.00987	MYC
bilobalide		chemical - endogenous non-mammalian			0.00987	MYC
microcystin-LR		chemical toxicant			0.00987	MYC
nintedanib		chemical drug			0.00987	DDIT3
pegintron		biologic drug			0.00987	DDX58
salvianolic acid A		chemical drug			0.00987	GPX1
TNFRSF8		transmembrane receptor			0.01	MYC,PCDH7
IL1B		cytokine	Activated	2.372	0.01	DDIT3,HSPA1A/HSPA1B,IFRD1,JUND,MYC,NFE2L2,PCDH7
Z-LLL-CHO		chemical - protease inhibitor		1.945	0.0102	DDIT3,MYC,NFE2L2,STMN1
HOXA9		transcription regulator			0.0102	AKAP13,MYC,SERINC2
SCD		enzyme			0.0104	DDIT3,SPTLC2
2-(4-amino-1-isopropyl-1H-pyrazolo[3,4-d]pyrimidin-3-yl)-1H-indol-5-ol		chemical reagent			0.0104	AKAP13,IFRD1,KLF6
U0126		chemical - kinase inhibitor		0.152	0.0106	DDIT3,JUND,MYC,NFE2L2,PAWR
rotenone		chemical toxicant			0.0107	DDIT3,GPX1
sodium arsenite		chemical drug			0.0107	DDIT3,NFE2L2
gentamicin C		chemical drug			0.011	MYC,Tpm1
let-7a-5p (and other miRNAs w/seed GAGGUAG)		mature microrna			0.011	IFRD1,MYC,Tpm1
25-hydroxycholesterol		chemical reagent			0.0113	DDIT3,JUND
folic acid		chemical - endogenous mammalian			0.0113	DDIT3,WNT4
lomustine		chemical drug			0.0113	MYC,Tpm1
IRF1		transcription regulator			0.0113	DDX58,MYC,PCDH7
metformin		chemical drug			0.0113	DDIT3,MYC,NFE2L2
PDX1		transcription regulator			0.0115	CAMK2N1,KLF6,MYC
topotecan		chemical drug			0.0115	GPX1,HSPA1A/HSPA1B,MYC
CD28		transmembrane receptor		0.404	0.0116	DDX58,HSPA1A/HSPA1B,MYC,SLC7A1
EGR1		transcription regulator			0.0117	JUND,MYC,WNT4
hydroxyurea		chemical drug			0.0117	GPX1,MYC
triamterene		chemical drug			0.0117	MYC,Tpm1
MTOR		kinase			0.0119	AKAP13,DCTN1,DDIT3,MYC
birabresib		chemical drug			0.012	DDIT3,MYC
glutathione		chemical - endogenous mammalian			0.012	DDIT3,MYC
1,2,3,4,6,7,8-heptachlorodibenzofuran		chemical toxicant			0.0123	COMT
2,3,7,8-tetrachlorodibenzofuran		chemical toxicant			0.0123	COMT
7S NGF		complex			0.0123	NFE2L2
ACOD1		enzyme			0.0123	NFE2L2
APAF1		other			0.0123	DDIT3
ASH2L		transcription regulator			0.0123	DDIT3
BBC3		other			0.0123	STMN1
Cpla2		group			0.0123	MYC
EAF2		transcription regulator			0.0123	WNT4
ERN2		kinase			0.0123	DDIT3
FZD7		g-protein coupled receptor			0.0123	MYC
G6PC3		phosphatase			0.0123	DDIT3
GNL2		enzyme			0.0123	MYC
GRAP2		other			0.0123	MYC
H-8		chemical toxicant			0.0123	MYC
H1f4		other			0.0123	MYC
HIVEP2		transcription regulator			0.0123	MYC
ITIH2		other			0.0123	SPINT2
LGH447		chemical drug			0.0123	MYC
MIR4269		microrna			0.0123	MYC
MNK1/2		group			0.0123	MYC
NCK2		kinase			0.0123	DDIT3
NPAS4		transcription regulator			0.0123	DDIT3
PTGIS		enzyme			0.0123	DDIT3
PUF60		other			0.0123	MYC
RAP1GDS1		other			0.0123	MYC
RBM14		transcription regulator			0.0123	MYC
SFRP2		transmembrane receptor			0.0123	MYC
SH2B2		other			0.0123	MYC
SLC37A4		transporter			0.0123	DDIT3
SNHG3		other			0.0123	MYC
SSBP2		transcription regulator			0.0123	MYC
TYMS		enzyme			0.0123	MYC
UTP18		other			0.0123	MYC
WFS1		enzyme			0.0123	DDIT3
ZMIZ2		transcription regulator			0.0123	MYC
acetyl-11-keto-beta-boswellic acid		chemical reagent			0.0123	DDIT3
chlorine		chemical toxicant			0.0123	NFE2L2
dinaciclib		chemical drug			0.0123	DDIT3
liraglutide		biologic drug			0.0123	DDIT3
lumacaftor		chemical drug			0.0123	DDIT3
luminespib		chemical drug			0.0123	HSPA1A/HSPA1B
miR-873-5p (and other miRNAs w/seed CAGGAAC)		mature microrna			0.0123	MYC
phenol derivative		chemical toxicant			0.0123	NFE2L2
polyinosine-polycytidylic acid/polyethylenimine formulation		chemical reagent			0.0123	DDX58
rigosertib		chemical drug			0.0123	MYC
scoparone		chemical - endogenous non-mammalian			0.0123	MYC
miR-145-5p (and other miRNAs w/seed UCCAGUU)		mature microrna			0.0124	KRT7,MYC
fenamic acid		chemical reagent			0.0127	MYC,Tpm1
mir-15		microrna			0.0127	DDX58,HSPA1A/HSPA1B
BRAF		kinase			0.013	MYC,PTPRS,SLC7A1
ID3		transcription regulator			0.0132	KLF6,MYC,PAWR
PD98059		chemical - kinase inhibitor		-0.473	0.0133	DDIT3,JUND,MYC,NFE2L2,PAWR
DDX58	0.042	enzyme			0.0134	DDX58,WNT4
IKZF3		transcription regulator			0.0134	DDX58,MYC
TCF3		transcription regulator			0.0136	DDX58,JUND,KLF6,MYC
MEF2D		transcription regulator			0.0138	JUND,NFE2L2
silibinin		chemical drug			0.0138	MYC,NFE2L2
PKD1		ion channel			0.0139	DDIT3,MYC,PCDH7
P38 MAPK		group			0.014	DDIT3,MAP4,MYC,NFE2L2
wortmannin		chemical - kinase inhibitor			0.0141	DDIT3,MYC,NFE2L2
deferoxamine		chemical drug			0.0143	DDIT3,HSPA1A/HSPA1B,MYC
miR-16-5p (and other miRNAs w/seed AGCAGCA)		mature microrna			0.0145	HSPA1A/HSPA1B,IFRD1,SLC7A1
CISH		other			0.0145	IFRD1,MYC
LCK		kinase			0.0145	Gar1,MYC
10-(6'-ubiquinonyl)decyltriphenylphosphonium		chemical drug			0.0148	NFE2L2
AQP11		transporter			0.0148	MYC
ATP2B2		transporter			0.0148	DDIT3
CBLC		enzyme			0.0148	DDIT3
CERS5		transcription regulator			0.0148	DDIT3
CNGB3		ion channel			0.0148	DDIT3
Crnde		other			0.0148	MYC
EPZ005687		chemical - protease inhibitor			0.0148	MYC
ETV3		transcription regulator			0.0148	MYC
GJA8		transporter			0.0148	DDIT3
H6PD		enzyme			0.0148	DDIT3
OMP-52M51		biologic drug			0.0148	MYC
PK11007		chemical reagent			0.0148	DDIT3
PLSCR1		enzyme			0.0148	MYC
PRKACB		kinase			0.0148	MYC
RBBP4		enzyme			0.0148	MYC
SERCA		group			0.0148	MYC
STX2		transporter			0.0148	MYC
TDG		enzyme			0.0148	MYC
TRIM33		transcription regulator			0.0148	MYC
ZMIZ1		transcription regulator			0.0148	MYC
ZNRF3		enzyme			0.0148	WNT4
acetazolamide		chemical drug			0.0148	DDIT3
adenosine dialdehyde		chemical reagent			0.0148	GPX1
coxsackievirus A21		biologic drug			0.0148	DDX58
curcuminoids		chemical drug			0.0148	NFE2L2
equol		chemical - endogenous non-mammalian			0.0148	MYC
fenebrutinib		chemical drug			0.0148	MYC
histidinol		chemical - endogenous mammalian			0.0148	SLC7A1
octyl gallate		chemical reagent			0.0148	GPX1
penicillamine		chemical drug			0.0148	DDIT3
pyridoxamine		chemical - endogenous mammalian			0.0148	DDIT3
saquinavir		chemical drug			0.0148	MYC
vanillyl-N-nonylamide		chemical drug			0.0148	DDIT3
NFATC2		transcription regulator			0.0149	MYC,PTPRS,SLCO3A1
TFAP2C		transcription regulator			0.0149	GPX1,MYC
Y 27632		chemical drug			0.0149	MYC,Tpm1
AHR		ligand-dependent nuclear receptor		1.941	0.015	CAMK2N1,MYC,NFE2L2,SPTLC2
triamcinolone acetonide		chemical drug			0.0151	AKAP13,DDIT3,MYC
PF4		cytokine			0.0153	DDX58,NFE2L2
MAPT		other			0.0153	DCTN1,HSPA1A/HSPA1B,STMN1,Tpm1
MAPK1		kinase		-0.617	0.0154	DDX58,JUND,MYC,NFE2L2
cerivastatin		chemical drug			0.0156	GPX1,MYC
dinoprost		chemical - endogenous mammalian			0.0156	HSPA1A/HSPA1B,MYC
TLR4		transmembrane receptor			0.0157	DDIT3,MYC,SLCO3A1,SPTLC2
ID2		transcription regulator			0.016	KLF6,MYC,PAWR
IFI16		transcription regulator			0.016	DDX58,GPX1
PRNP		other			0.016	HSPA1A/HSPA1B,MYC
ANGPT2		growth factor			0.0162	COMT,DDIT3,HSPA1A/HSPA1B
(+)-MK-801		chemical drug			0.0164	HSPA1A/HSPA1B,JUND
HDAC5		transcription regulator			0.0164	KLF6,MYC
LDLR		transporter			0.0164	DDIT3,MYC,UBE2D3
MAP2K1/2		group			0.0164	DDIT3,MYC
MMP9		peptidase			0.0164	DDIT3,MYC
romidepsin		biologic drug			0.0164	DDIT3,MYC
Gsk3		group			0.0168	DDIT3,MYC
PD173074		chemical reagent			0.0168	KRT7,MYC
PIN1		enzyme			0.0168	DDIT3,MYC
carbon tetrachloride		chemical toxicant			0.017	DDIT3,JUND,MYC
tunicamycin		chemical - endogenous non-mammalian			0.017	DDIT3,IFRD1,MYC
15-E2-isoketal modified phosphatidylethanolamine		chemical reagent			0.0172	DDIT3
4-coumaric acid		chemical - endogenous mammalian			0.0172	MYC
AKIRIN2		other			0.0172	MYC
CB-5083		chemical drug			0.0172	DDIT3
CUL1		enzyme			0.0172	MYC
DVL1		other			0.0172	MYC
EIF2A		translation regulator			0.0172	DDIT3
ENO1		enzyme			0.0172	MYC
FERMT1		other			0.0172	WNT4
G3BP1		enzyme			0.0172	DDX58
GNE		kinase			0.0172	DDIT3
GSK 650394		chemical reagent			0.0172	DDIT3
HOXC11		transcription regulator			0.0172	PAWR
ISG15		other			0.0172	DDX58
Immunoglobulin Lambda Light Chain		group			0.0172	DDIT3
MED13L		other			0.0172	MYC
MLLT3		transcription regulator			0.0172	MYC
MS4A1		other			0.0172	MYC
N-methyl mesoporphyrin IX		chemical reagent			0.0172	MYC
PQQ cofactor		chemical - endogenous non-mammalian			0.0172	NFE2L2
RHOC		enzyme			0.0172	DDIT3
SERPINA4		other			0.0172	MYC
TNKS		enzyme			0.0172	MYC
diquat		chemical toxicant			0.0172	NFE2L2
ganetespib		chemical drug			0.0172	MYC
idelalisib		chemical drug			0.0172	MYC
olomoucine		chemical - kinase inhibitor			0.0172	DDIT3
phosphatidic acid		chemical - endogenous mammalian			0.0172	MYC
sphingomyelinase		group			0.0172	MYC
temsirolimus		chemical drug			0.0172	MYC
ubiquinone 9		chemical - endogenous mammalian			0.0172	HSPA1A/HSPA1B
ZBTB17		transcription regulator			0.0176	CAMK2N1,DDIT3
genistein		chemical drug		-0.218	0.0179	HSPA1A/HSPA1B,JUND,MYC,NFE2L2
SPIB		transcription regulator			0.0184	HSPA1A/HSPA1B,KLF6
AGN194204		chemical drug			0.0185	Crip2,KLF6,MYC
dexamethasone		chemical drug		-0.395	0.0188	AKAP13,CDV3,DDIT3,DDX58,GPX1,IFRD1,JUND,KLF6,KRT7,MYC,WNT4
CDH1		other			0.0188	KRT7,MYC
SCAP		other			0.0188	DDIT3,SLC7A1
SMO		g-protein coupled receptor			0.0188	MTMR7,MYC
epigallocatechin-gallate		chemical drug			0.0194	JUND,MYC,NFE2L2
2-amino-5-azotoluene		chemical toxicant			0.0196	MYC
ABCC1		transporter			0.0196	NFE2L2
AQP7		transporter			0.0196	MYC
ATF7		transcription regulator			0.0196	DDIT3
CAPN2		peptidase			0.0196	DDIT3
CERS6		transcription regulator			0.0196	DDIT3
CYSLTR1		g-protein coupled receptor			0.0196	NFE2L2
CYTOR		other			0.0196	MYC
Cyclin A		group			0.0196	MYC
GADD45GIP1		other			0.0196	DDIT3
GSTK1		enzyme			0.0196	DDIT3
HNRNPC		other			0.0196	MYC
LTBP4		growth factor			0.0196	MYC
MRE11		enzyme			0.0196	MYC
PCBP1		translation regulator			0.0196	MYC
PDS5B		other			0.0196	MYC
PON2		enzyme			0.0196	DDIT3
PROKR1		g-protein coupled receptor			0.0196	MYC
R59949		chemical - kinase inhibitor			0.0196	MYC
RBCK1		transcription regulator			0.0196	MYC
RGS19		enzyme			0.0196	MYC
SLC39A14		transporter			0.0196	DDIT3
SMARCA1		transcription regulator			0.0196	MYC
SOAT1		enzyme			0.0196	DDIT3
SULT2B1		enzyme			0.0196	MYC
WNT7B		other			0.0196	MYC
ZNF382		transcription regulator			0.0196	MYC
aplidine		biologic drug			0.0196	JUND
carnosol		chemical - endogenous non-mammalian			0.0196	NFE2L2
cordycepin		chemical drug			0.0196	MYC
dehydrocostus lactone		chemical - endogenous non-mammalian			0.0196	MYC
farnesyl transferase		complex			0.0196	KLF6
kremezin		chemical drug			0.0196	NFE2L2
mechlorethamine		chemical drug			0.0196	NFE2L2
proteasome inhibitor		chemical drug			0.0196	MYC
tyrphostin		chemical drug			0.0196	DDIT3
ERBB4		kinase			0.0197	DDIT3,MYC
Growth hormone		group			0.02	COMT,DDIT3,MYC
IRF5		transcription regulator			0.0201	DDX58,MYC
SBDS		other			0.0201	DDIT3,PCDH7
doxycycline		chemical drug			0.0201	HSPA1A/HSPA1B,NFE2L2
vancomycin		biologic drug			0.0201	MYC,Tpm1
4-phenylbutyric acid		chemical - endogenous mammalian			0.0205	CDV3,DDIT3
Hsp90		group			0.0205	HSPA1A/HSPA1B,MYC
IL2		cytokine			0.0206	CAMK2N1,HSPA1A/HSPA1B,JUND,KLF6,MYC
CD3		complex		1.433	0.0207	HSPA1A/HSPA1B,MYC,NFE2L2,SLC7A1,STMN1
progesterone		chemical - endogenous mammalian		0.22	0.0207	COMT,DDIT3,KRT7,MYC,WNT4
methylprednisolone		chemical drug		0.132	0.0208	COMT,HSPA1A/HSPA1B,MYC,NFE2L2,Tpm1
RASSF1		other			0.0214	MYC,PCDH7
N-acetyl-L-cysteine		chemical drug			0.0216	DDIT3,MYC,NFE2L2
TCF		group			0.0219	AKAP13,MYC
4-nonylphenol		chemical toxicant			0.0221	MYC
AFF4		transcription regulator			0.0221	MYC
Bcl9-Cbp/p300-Ctnnb1-Lef/Tcf		complex			0.0221	MYC
CD99		other			0.0221	JUND
CTDSP1		phosphatase			0.0221	MYC
CTH		enzyme			0.0221	DDIT3
Ck2		complex			0.0221	MYC
GPR183		g-protein coupled receptor			0.0221	MYC
HUWE1		transcription regulator			0.0221	MYC
ING4		transcription regulator			0.0221	MYC
L-cysteine		chemical - endogenous mammalian			0.0221	MYC
L-lysine		chemical - endogenous mammalian			0.0221	DDIT3
MEMO1		other			0.0221	MYC
MPL		transmembrane receptor			0.0221	MYC
PTGES3		enzyme			0.0221	MYC
RPL11		other			0.0221	MYC
RSPO3		kinase			0.0221	WNT4
SR1078		chemical reagent			0.0221	DDIT3
TSG101		transcription regulator			0.0221	STMN1
UACA		other			0.0221	DDIT3
UBA7		enzyme			0.0221	DDX58
USP17L2 (includes others)		peptidase			0.0221	MYC
USP37		peptidase			0.0221	MYC
YBX3		transcription regulator			0.0221	MYC
bazedoxifene		chemical drug			0.0221	MYC
bicyclol		chemical drug			0.0221	MYC
bupivacaine		chemical drug			0.0221	JUND
cholesterol sulfate		chemical - endogenous mammalian			0.0221	JUND
cyclopentenone		chemical reagent			0.0221	HSPA1A/HSPA1B
miR-185-5p (and other miRNAs w/seed GGAGAGA)		mature microrna			0.0221	DDIT3
phosphatidylcholine		chemical - endogenous mammalian			0.0221	DDIT3
prodigiosin		chemical toxicant			0.0221	DDIT3
mir-122		microrna			0.0223	MAP4,SLC7A1
KMT2A		transcription regulator			0.0228	KLF6,MYC
mir-210		microrna			0.0232	KLF6,STMN1
okadaic acid		chemical toxicant			0.0232	JUND,MYC
ERK		group			0.0233	GPRC5C,MYC,NFE2L2
bortezomib		chemical drug			0.0236	DDIT3,HSPA1A/HSPA1B,MYC
Ifnar		group			0.0237	DDIT3,DDX58
daidzein		chemical drug			0.0237	MYC,NFE2L2
RUNX1		transcription regulator			0.0238	DDIT3,MYC,PCDH7
AFF1		transcription regulator			0.0245	MYC
CAVIN1		transcription regulator			0.0245	MYC
CNBP		transcription regulator			0.0245	MYC
CNGA3		ion channel			0.0245	DDIT3
CXCL13		cytokine			0.0245	MYC
DAB2IP		other			0.0245	MYC
DCLK1		kinase			0.0245	MYC
EXT1		enzyme			0.0245	MYC
FTO		enzyme			0.0245	HSPA1A/HSPA1B
IL9R		transmembrane receptor			0.0245	MYC
INCB054329		chemical drug			0.0245	MYC
Igkv1-117		other			0.0245	MYC
L-threonine		chemical - endogenous mammalian			0.0245	MYC
NCK1		kinase			0.0245	DDIT3
PCBP2		other			0.0245	MYC
RSPO1		other			0.0245	MYC
SETD7		enzyme			0.0245	MYC
SH2B1		other			0.0245	MYC
Shc		group			0.0245	MYC
Sry		transcription regulator			0.0245	GPX1
TRAF3IP3		other			0.0245	MYC
TRPM8		ion channel			0.0245	HSPA1A/HSPA1B
allyl isothiocyanate		chemical toxicant			0.0245	NFE2L2
anacardic acid		chemical - endogenous non-mammalian			0.0245	DDIT3
cercosporin		chemical - endogenous non-mammalian			0.0245	MYC
tridecanoic acid		chemical - endogenous mammalian			0.0245	DDIT3
methylselenic acid		chemical reagent			0.0246	CAMK2N1,DDIT3,MYC
allopurinol		chemical drug			0.0246	MYC,Tpm1
bee venom		chemical - endogenous non-mammalian			0.0246	DDIT3,IFRD1
eicosapentenoic acid		chemical drug			0.0246	DDIT3,NFE2L2
Ifn gamma		complex			0.0251	MYC,PCDH7
CEBPD		transcription regulator			0.026	DDIT3,MYC
RBL2		other			0.026	MYC,STMN1
RPTOR		other			0.026	MYC,SPTLC2
CEBPA		transcription regulator		-1.124	0.0263	GTF3A,KRT7,MYC,SPINT2
LMNA		other			0.0269	JUND,NUFIP2,PCDH7
3,4,3',4'-tetrachlorobiphenyl		chemical toxicant			0.0269	COMT
CEBPG		transcription regulator			0.0269	DDIT3
CERS2		transcription regulator			0.0269	DDIT3
CNB-001		chemical reagent			0.0269	DDIT3
COL17A1		other			0.0269	WNT4
CTSV		peptidase			0.0269	CD2AP
FANCD2		other			0.0269	GPX1
HIPK1		kinase			0.0269	NFE2L2
HOXA-AS2		other			0.0269	DDIT3
I-BET-151		chemical reagent			0.0269	DDIT3
MAFA		transcription regulator			0.0269	DDIT3
MAP3K11		kinase			0.0269	MYC
OIP5-AS1		other			0.0269	MYC
PPP1R15B		phosphatase			0.0269	DDIT3
PTCSC3		other			0.0269	MYC
RFX2		transcription regulator			0.0269	MYC
SLC7A5		transporter			0.0269	DDIT3
SNHG20		other			0.0269	MYC
ST3-Hel2A-2		chemical reagent			0.0269	DDIT3
acriflavine		chemical toxicant			0.0269	MYC
buparlisib		chemical drug			0.0269	NFE2L2
clonidine		chemical drug			0.0269	MYC
coal tar		chemical drug			0.0269	GPX1
ferric ammonium citrate		chemical drug			0.0269	MYC
orlistat		chemical drug			0.0269	DDIT3
sapanisertib		chemical drug			0.0269	DDIT3
Nfat (family)		group			0.027	KLF6,SLC7A1
SOD2		enzyme			0.027	DDIT3,MYC
FOXO1		transcription regulator		-0.095	0.0276	GPX1,MYC,SPTLC2,WNT4
INHA		growth factor			0.0279	MYC,PCDH7
arachidonic acid		chemical - endogenous mammalian			0.0279	DDIT3,KLF6
CCN2		growth factor			0.0284	MYC,Tpm1
cyclic AMP		chemical - endogenous mammalian			0.0285	DDIT3,GTF3A,MYC
F2		peptidase			0.029	KLF6,MYC,SLC7A1
SB203580		chemical - kinase inhibitor		0	0.0291	CD2AP,DDIT3,JUND,MYC
4-octyl itaconate		chemical reagent			0.0293	NFE2L2
CCAT1		other			0.0293	MYC
CDN1163		chemical reagent			0.0293	DDIT3
Col17a1		other			0.0293	WNT4
IFNL4		cytokine			0.0293	DDX58
JUP		other			0.0293	MYC
MAPKAPK3		kinase			0.0293	DDIT3
NUMBL		other			0.0293	MYC
PAX4		transcription regulator			0.0293	MYC
RB1CC1		other			0.0293	MYC
SH3KBP1		other			0.0293	MYC
UBA1		enzyme			0.0293	DDIT3
cucurbitacin B		chemical - endogenous non-mammalian			0.0293	MYC
embelin		chemical - endogenous non-mammalian			0.0293	MYC
miR-375-3p (miRNAs w/seed UUGUUCG)		mature microrna			0.0293	MYC
roflumilast N-oxide		chemical - endogenous mammalian			0.0293	NFE2L2
NR3C1		ligand-dependent nuclear receptor			0.0295	COMT,GPX1,JUND,MYC,PAWR
EIF2AK3		kinase			0.0299	DDIT3,MYC
APP		other			0.0302	DDX58,HSPA1A/HSPA1B,JUND,MYC,STMN1,Tpm1
SMAD3		transcription regulator			0.0304	DDIT3,JUND,MYC
RNA polymerase II		complex			0.0307	DDIT3,HSPA1A/HSPA1B,MYC
2,4,5,2',4',5'-hexachlorobiphenyl		chemical toxicant			0.0309	MYC,PTPRS
diethylnitrosamine		chemical toxicant			0.0309	MYC,NFE2L2
RB1		transcription regulator		-0.254	0.0315	DDIT3,GPRC5C,MYC,Tpm1
1,2-dimethylhydrazine		chemical toxicant			0.0317	MYC
AKT inhibitor VIII		chemical reagent			0.0317	MYC
Adaptor protein 1		complex			0.0317	MYC
CDC37		other			0.0317	MYC
CSF2RA		transmembrane receptor			0.0317	MYC
CSNK2B		kinase			0.0317	MYC
MIRLET7		group			0.0317	MYC
PEMT		enzyme			0.0317	DDIT3
PIM3		kinase			0.0317	MYC
POLR3G		enzyme			0.0317	KLF6
POU3F1		transcription regulator			0.0317	Crip2
PPP5C		phosphatase			0.0317	MYC
RBBP7		transcription regulator			0.0317	MYC
RPL22		translation regulator			0.0317	DDIT3
S-equol		chemical drug			0.0317	NFE2L2
SAMHD1		enzyme			0.0317	DDX58
[D-Ala2,N-Me-Phe4,Gly5-ol]-Enkephalin		chemical reagent			0.0317	CD2AP
gambogic acid		chemical - endogenous non-mammalian			0.0317	MYC
calcimycin		chemical reagent			0.033	DDIT3,MYC
PRL		cytokine			0.033	CAMK2N1,DDX58,MYC
dextran sulfate		chemical drug			0.0333	MYC,STMN1,WNT4
5-hydroxytryptamine		chemical - endogenous mammalian			0.0341	GTF3A,MYC
Ahr-aryl hydrocarbon-Arnt		complex			0.0341	NFE2L2
BMX		kinase			0.0341	HSPA1A/HSPA1B
CBLB		enzyme			0.0341	DDIT3
DNAJC3		other			0.0341	DDIT3
GTF2I		transcription regulator			0.0341	MYC
HOXA4		transcription regulator			0.0341	MYC
IQGAP2		other			0.0341	WNT4
MFN2		enzyme			0.0341	DDIT3
PTBP1		enzyme			0.0341	MYC
Ptprd		phosphatase			0.0341	MYC
RBP3		transporter			0.0341	DDIT3
TRAF4		other			0.0341	MYC
clasto-lactacystin beta-lactone		chemical - protease inhibitor			0.0341	DDIT3
dihydroartemisinin		chemical drug			0.0341	MYC
growth factor		group			0.0341	MYC
manganese		chemical - endogenous mammalian			0.0341	DDIT3
meclizine		chemical drug			0.0341	MYC
metoprolol		chemical drug			0.0341	MYC
pentobarbital		chemical drug			0.0341	JUND
polyamines		chemical - other			0.0341	DDIT3
zeranol		chemical - endogenous mammalian			0.0341	MYC
HGF		growth factor		1.951	0.0351	AKAP13,DDIT3,MYC,SLC7A1
paraquat		chemical toxicant			0.0352	GPX1,KLF6
JQ1		chemical reagent			0.0362	DDIT3,MYC
GATA1		transcription regulator			0.0364	Gar1,MYC,Tpm1
1'-acetoxychavicol acetate		chemical reagent			0.0365	MYC
Betacatenin/TCF		complex			0.0365	MYC
CNOT3		other			0.0365	MYC
CPEB1		translation regulator			0.0365	MYC
HOXB4		transcription regulator			0.0365	MYC
IGFBP7		transporter			0.0365	MYC
ITIH1		other			0.0365	SPINT2
MYH9		enzyme			0.0365	MYC
Mn(III)-tetrakis-(4-benzoic acid) porphyrin		chemical reagent			0.0365	DDIT3
NSD1		transcription regulator			0.0365	KLF6
NUP98-KDM5A		fusion gene/product			0.0365	MYC
NUP98-NSD1		fusion gene/product			0.0365	MYC
PNN		other			0.0365	MYC
SELENOS		other			0.0365	DDIT3
SMC3		other			0.0365	MYC
TCF/LEF		group			0.0365	MYC
THRAP3		transcription regulator			0.0365	RYBP
TNFAIP2		other			0.0365	SLCO3A1
TOPBP1		other			0.0365	MYC
U18666A		chemical reagent			0.0365	DDIT3
USP19		peptidase			0.0365	DDIT3
ZBTB33		transcription regulator			0.0365	MYC
costunolide		chemical - endogenous non-mammalian			0.0365	MYC
cyproterone acetate		chemical drug			0.0365	MYC
fluoride		chemical - endogenous mammalian			0.0365	DDIT3
lonafarnib		chemical drug			0.0365	DDIT3
mir-290		microrna			0.0365	MYC
prazosin		chemical drug			0.0365	MYC
pyridoxine		chemical - endogenous mammalian			0.0365	WNT4
IFNB1		cytokine			0.0367	DDX58,GLIS2,MYC
Vegf		group		1.982	0.0369	AKAP13,DDIT3,MYC,SLC7A1
PRKCA		kinase			0.0373	HSPA1A/HSPA1B,MYC
AKT1		kinase			0.0379	JUND,MYC,NFE2L2
DICER1		enzyme			0.0379	MYC,Tpm1,WNT4
YY1		transcription regulator			0.0382	MYC,PAWR,Tpm1
E2f		group			0.0384	MYC,STMN1
CSF2RB		transmembrane receptor			0.0389	MYC
CXCL2		cytokine			0.0389	IFRD1
Gm12602		other			0.0389	Tpm1
MEL T1		chemical - kinase inhibitor			0.0389	HSPA1A/HSPA1B
MIR101		group			0.0389	STMN1
NDN		transcription regulator			0.0389	MYC
OSBPL8		transporter			0.0389	DDIT3
PLCL1		enzyme			0.0389	WNT4
PURA		transcription regulator			0.0389	MYC
SFRP4		transmembrane receptor			0.0389	MYC
STIM1		ion channel			0.0389	GPX1
Stat5 dimer		complex			0.0389	MYC
ZFPM2		transcription regulator			0.0389	WNT4
allyl sulfide		chemical drug			0.0389	NFE2L2
caffeic acid		chemical drug			0.0389	NFE2L2
cyclopiazonic acid		chemical - endogenous non-mammalian			0.0389	DDIT3
hydrogen sulfide		chemical - endogenous mammalian			0.0389	DDIT3
indole		chemical - endogenous mammalian			0.0389	NFE2L2
monorden		chemical - endogenous non-mammalian			0.0389	DDIT3
myricetin		chemical - endogenous non-mammalian			0.0389	MYC
tauroursodeoxycholic acid		chemical - endogenous mammalian			0.0389	DDIT3
STAT5a/b		group			0.039	CDC42EP5,MYC
corticosterone		chemical - endogenous mammalian			0.039	DDIT3,MYC
RUNX3		transcription regulator			0.0401	MYC,PCDH7
KLF4		transcription regulator			0.0402	KRT7,MYC,RYBP
TMPRSS2-ERG		fusion gene/product			0.0407	DDIT3,MYC
IL1RN		cytokine			0.0413	DDX58,KLF6
ARG1		enzyme			0.0413	DDIT3
CCAT2		other			0.0413	MYC
DDX17		enzyme			0.0413	MYC
DROSHA		enzyme			0.0413	MYC
Integrin		complex			0.0413	MYC
MAZ		transcription regulator			0.0413	MYC
PPP1R1B		phosphatase			0.0413	MYC
Smad2/3-Smad4		complex			0.0413	MYC
TARBP2		other			0.0413	MYC
bombesin		chemical - endogenous mammalian			0.0413	MYC
cryptotanshinone		chemical drug			0.0413	DDIT3
decursin		chemical - endogenous non-mammalian			0.0413	MYC
mir-451		microrna			0.0413	MYC
nimodipine		chemical drug			0.0413	MYC
oxysterol		chemical - endogenous mammalian			0.0413	MYC
phenyl-N-tert-butylnitrone		chemical reagent			0.0413	HSPA1A/HSPA1B
premarin		chemical drug			0.0413	MYC
zearalenone		chemical toxicant			0.0413	MYC
IRS1		enzyme			0.0418	DDIT3,MYC
LY294002		chemical - kinase inhibitor		-1.322	0.0426	CD2AP,DDIT3,MYC,NFE2L2
CSF2		cytokine			0.0428	DDIT3,IFRD1,MYC,STMN1
ATP2A2		transporter			0.0437	DDIT3
AURKA		kinase			0.0437	MYC
CD22		transmembrane receptor			0.0437	MYC
CRBN		enzyme			0.0437	MYC
CREB3		transcription regulator			0.0437	DDIT3
Endothelin		group			0.0437	MYC
GFI1B		transcription regulator			0.0437	MYC
N(6)-(3-iodobenzyl)-5'-N-methylcarboxamidoadenosine		chemical drug			0.0437	MYC
NFASC		other			0.0437	DCTN1
OPA1		enzyme			0.0437	DDIT3
PDGFRA		kinase			0.0437	MYC
PLA2G4A		enzyme			0.0437	MYC
PLC		group			0.0437	MYC
S100B		other			0.0437	MYC
SEL1L		other			0.0437	DDIT3
YY2		transcription regulator			0.0437	MYC
acyclic retinoid		chemical drug			0.0437	MYC
indirubin		chemical drug			0.0437	MYC
mir-154		microrna			0.0437	MYC
pomalidomide		chemical drug			0.0437	MYC
sertraline		chemical drug			0.0437	DDIT3
MET		kinase			0.0442	MYC,SLCO3A1
SUZ12		enzyme			0.0448	JUND,MYC
ACTB		other			0.046	STMN1
BAP1		peptidase			0.046	DDIT3
CHEK1		kinase			0.046	MYC
ERF		transcription regulator			0.046	MYC
HNRNPU		transporter			0.046	MYC
IL1RL1		transmembrane receptor			0.046	PAWR
IL2RB		transmembrane receptor			0.046	MYC
MST1R		kinase			0.046	MYC
PDCD4		other			0.046	MYC
TMBIM6		other			0.046	DDIT3
dichlororibofuranosylbenzimidazole		chemical toxicant			0.046	MYC
peroxynitrite		chemical toxicant			0.046	DDIT3
pevonedistat		chemical drug			0.046	DDIT3
prostaglandin E1		chemical - endogenous mammalian			0.046	MYC
riboflavin		chemical - endogenous mammalian			0.046	WNT4
trastuzumab		biologic drug			0.046	MYC
FOXM1		transcription regulator			0.0465	MYC,STMN1
mibolerone		chemical drug			0.0465	MYC,STMN1
ERN1		kinase			0.0471	DDIT3,SLC7A1
ritonavir		chemical drug			0.0484	IFRD1,MYC
TCF7L2		transcription regulator			0.0484	CAMK2N1,Ktn1,MYC
(1S,2R)-NCL-1		chemical reagent			0.0484	DDIT3
7-ketocholesterol		chemical - endogenous mammalian			0.0484	DDIT3
CYB5R4		enzyme			0.0484	DDIT3
HNRNPA1		enzyme			0.0484	MYC
IAPP		other			0.0484	MYC
MPZ		other			0.0484	DDIT3
NCD-38		chemical reagent			0.0484	DDIT3
PIM2		kinase			0.0484	MYC
PPP1R15A		other			0.0484	DDIT3
RFX1		transcription regulator			0.0484	MYC
RFX3		transcription regulator			0.0484	MYC
RPA1		other			0.0484	HSPA1A/HSPA1B
STAP2		other			0.0484	MYC
STAU1		transporter			0.0484	MYC
Usp17la (includes others)		peptidase			0.0484	MYC
betaine		chemical - endogenous mammalian			0.0484	DDIT3
dactolisib		chemical drug			0.0484	MYC
farnesol		chemical reagent			0.0484	DDIT3
mir-101		microrna			0.0484	STMN1
ssRNA40		chemical reagent			0.0484	DDX58
BRD4		kinase			0.049	DDIT3,MYC
Pka		complex			0.049	DDIT3,KLF6
SYVN1		transporter			0.049	DCTN1,NFE2L2
imatinib		chemical drug			0.0491	DDIT3,IFRD1,MYC
sulforafan		chemical drug			0.0496	GPX1,NFE2L2

## Sheet: M19_C2vC0
© 2000-2020 QIAGEN. All rights reserved.
Upstream Regulator	Expr Log Ratio	Molecule Type	Predicted Activation State	Activation z-score	p-value of overlap	Target molecules in dataset	Mechanistic Network
MLXIPL		transcription regulator	Activated	4.128	5.9e-101	RPL11,RPL12,RPL13A,RPL14,RPL17,RPL19,RPL22,Rpl22l1,RPL23,Rpl23a,RPL24,RPL26,RPL27A,RPL28,Rpl29 (includes others),RPL30,RPL31,Rpl32,RPL35,RPL35A,Rpl36,Rpl36a,RPL37,RPL37A,RPL38,RPL39,RPL6,Rplp1 (includes others),RPLP2,RPS11,RPS12,RPS15,RPS15A,RPS16,RPS17,RPS18,RPS19,RPS20,RPS23,RPS24,RPS25,Rps27/Rps27rt,RPS27A,RPS28,RPS29,RPS8
YAP1		transcription regulator			1.52e-81	RPL11,RPL12,RPL13A,RPL14,RPL17,RPL19,RPL22,Rpl22l1,RPL23,Rpl23a,RPL24,RPL26,RPL27A,RPL28,Rpl29 (includes others),RPL30,RPL31,Rpl32,RPL35,RPL35A,Rpl36,Rpl36a,RPL37,RPL37A,RPL38,RPL39,RPL6,Rplp1 (includes others),RPLP2,RPS11,RPS12,RPS15,RPS15A,RPS16,RPS17,RPS18,RPS19,RPS20,RPS23,RPS24,RPS25,Rps27/Rps27rt,RPS27A,RPS28,RPS29,RPS8	CTNNB1,MYC,YAP1
LARP1		translation regulator	Inhibited	-4.07	1.6e-81	RPL11,RPL12,RPL13A,RPL14,RPL17,RPL19,RPL22,RPL23,RPL24,RPL26,RPL27A,RPL28,RPL30,RPL31,RPL35,RPL35A,RPL37,RPL37A,RPL38,RPL39,RPL6,RPS11,RPS12,RPS15,RPS15A,RPS16,RPS18,RPS19,RPS20,RPS23,RPS24,RPS25,RPS27A,RPS28,RPS29,RPS8,TPT1
torin1		chemical reagent			1.36e-66	RPL11,RPL12,RPL13A,RPL14,RPL17,RPL19,RPL22,RPL23,RPL24,RPL26,RPL27A,RPL28,RPL30,RPL31,RPL35,RPL35A,RPL37,RPL37A,RPL38,RPL39,RPL6,RPS11,RPS12,RPS15,RPS15A,RPS16,RPS18,RPS19,RPS20,RPS23,RPS24,RPS25,RPS27A,RPS28,RPS29,RPS8,TPT1
CTNNB1		transcription regulator			2.74e-58	BTF3,RPL11,RPL12,RPL13A,RPL14,RPL17,RPL19,RPL22,Rpl22l1,RPL23,Rpl23a,RPL24,RPL26,RPL27A,RPL28,Rpl29 (includes others),RPL30,RPL31,Rpl32,RPL35,RPL35A,Rpl36,Rpl36a,RPL37,RPL37A,RPL38,RPL39,RPL6,Rplp1 (includes others),RPLP2,RPS11,RPS12,RPS15,RPS15A,RPS16,RPS17,RPS18,RPS19,RPS20,RPS23,RPS24,RPS25,Rps27/Rps27rt,RPS27A,RPS28,RPS29,RPS8	CTNNB1,MLXIPL,MYC
MYC		transcription regulator	Activated	3.948	6.11e-51	RPL11,RPL12,RPL13A,RPL14,RPL17,RPL19,RPL22,Rpl22l1,RPL23,Rpl23a,RPL24,RPL26,RPL27A,RPL28,Rpl29 (includes others),RPL30,RPL31,Rpl32,RPL35,RPL35A,Rpl36,Rpl36a,RPL37,RPL37A,RPL38,RPL39,RPL6,Rplp1 (includes others),RPLP2,RPS11,RPS12,RPS15,RPS15A,RPS16,RPS17,RPS18,RPS19,RPS20,RPS23,RPS24,RPS25,Rps27/Rps27rt,RPS27A,RPS28,RPS29,RPS8	CTNNB1,MLXIPL,MYC
MYCN		transcription regulator	Activated	3.568	1.56e-47	RPL11,RPL12,RPL13A,RPL17,RPL19,RPL22,RPL23,RPL24,RPL26,RPL27A,RPL28,RPL30,RPL31,RPL35,RPL35A,RPL37,RPL37A,RPL38,RPL39,RPL6,RPLP2,RPS12,RPS15,RPS16,RPS17,RPS19,RPS20,RPS23,RPS24,RPS25,RPS28,RPS8
RICTOR		other	Inhibited	-2.887	9.55e-38	RPL11,RPL12,RPL13A,RPL14,RPL17,RPL22,RPL23,Rpl23a,RPL26,RPL28,Rpl29 (includes others),RPL30,RPL35A,RPL38,RPL6,Rplp1 (includes others),RPLP2,RPS11,RPS15,RPS18,RPS19,RPS23,RPS24,RPS27A,RPS29,RPS8,Uba52
POLG		enzyme			4.48e-25	RPL14,RPL23,RPL27A,Rpl32,Rpl36a,RPS16,RPS19,RPS24,RPS25,RPS27A,TPT1,USE1
5-fluorouracil		chemical drug		-1.606	1.07e-24	BTF3,RPL11,RPL19,RPL23,RPL24,RPL27A,RPL30,RPL31,RPL35,RPL35A,RPL37,RPL38,RPL6,RPS12,RPS15A,RPS16,RPS23,RPS27A,RPS28,RPS29,RPS8
sirolimus		chemical drug	Inhibited	-2.837	2.71e-20	RPL13A,RPL19,RPL23,RPL27A,RPL30,RPL35,RPL37,RPL37A,RPL38,RPS12,RPS15,RPS16,RPS17,RPS18,RPS19,RPS20,RPS23,RPS24,RPS27A,RPS29,RPS8
RRP1B		transcription regulator			3.7e-19	RPL11,RPL13A,RPL14,RPL19,RPL22,RPL37,RPL37A,RPL39,RPL6,Rplp1 (includes others),RPS19,Rps27/Rps27rt,RPS8
RPS15	0.027	other			3.56e-13	RPS11,RPS15,RPS16,RPS19,RPS23,RPS24,RPS25,RPS29
uranyl nitrate		chemical toxicant		1.757	4.37e-12	RPL19,RPL23,Rplp1 (includes others),RPS16,RPS24,RPS29,RPS8,TPT1,Uba52
CD 437		chemical drug		-1.897	4.97e-11	RPL11,RPL13A,RPL19,RPL24,RPL39,RPLP2,RPS15,RPS16,RPS17,TOMM7
dihydrotestosterone		chemical - endogenous mammalian			7.24e-11	RPL12,RPL19,RPL28,RPL30,RPL37A,Rplp1 (includes others),RPLP2,RPS12,RPS17,RPS20,RPS23,RPS24,RPS28,RPS29
miR-542-3p (miRNAs w/seed GUGACAG)		mature microrna		-0.985	1.01e-09	RPL11,RPL22,RPS23,RPS28
TCR		complex		0.847	1.08e-09	RPL13A,RPL17,RPL22,RPL30,RPL31,RPL38,RPL6,RPS15,RPS16,RPS17,RPS23
ST1926		chemical drug		-1.414	4.52e-09	RPL19,RPL24,RPL39,RPL6,RPS15,RPS27A,TOMM7,TPT1
interferon beta-1a		biologic drug			1.77e-08	RPL19,RPL22,RPL24,RPL26,RPL27A,RPS19,RPS28
IL3		cytokine			1.07e-07	RPL11,Rpl23a,Rpl29 (includes others),RPL6,RPS12,RPS16,RPS17,RPS19,RPS20
HSP90B1		other		0.447	2.89e-07	RPL12,RPL27A,RPL30,RPLP2,RPS20
tanespimycin		chemical drug		-0.816	5.46e-07	RPL24,RPL27A,RPL30,RPL35,RPS16,RPS8
MYCL		transcription regulator		0.391	1.92e-06	RPL11,RPL12,RPL13A,RPL17,RPL19
ZFHX3		transcription regulator			2.4e-06	RPL37,Rplp1 (includes others),RPLP2,RPS12,RPS28
SIRT6		enzyme			0.000361	RPL23,RPL6,RPS15A
bromobenzene		chemical toxicant			0.000627	RPL22,RPL28,RPL35
poly rI:rC-RNA		biologic drug			0.00101	RPL11,RPL12,RPL13A,RPL17,RPL19,Rpl23a,RPL30
DOT1L		phosphatase			0.00125	RPL19,RPS23
selenomethylselenocysteine		chemical - endogenous mammalian			0.00125	RPS11,RPS12
tretinoin		chemical - endogenous mammalian	Inhibited	-2	0.00141	RPL11,Rpl23a,Rpl29 (includes others),RPL6,RPS12,RPS16,RPS17,RPS19,RPS20,Rps27/Rps27rt,TPT1
FAAH		enzyme			0.00233	RPL17,RPS18
CSN2		kinase			0.00239	BTF3
IFRD1		other			0.00249	RPL22,RPL39
methylnitrosourea		chemical toxicant			0.00316	RPS11,RPS12
IGF1R		transmembrane receptor			0.00457	RPL24,RPL35A,RPL37A,RPS24
RFX4		transcription regulator			0.00477	RPL30
ACOX1		enzyme			0.00503	RPL12,Rpl36,RPS24
HRAS		enzyme		1.387	0.00545	RPL23,RPL27A,RPL30,RPL37,RPL39,RPS11
PRKAG3		other			0.00731	RPL12,RPL13A,RPL22
nitrofurantoin		chemical drug			0.00731	RPL13A,RPL6,RPS8
BDNF		growth factor		-1	0.00783	Rpl23a,RPL35A,RPL37A,RPS23
sodium alum		chemical drug			0.00951	TPT1
MTOR		kinase		-1	0.0104	RPL12,RPL23,RPS11,RPS18
FOXK1		transcription regulator			0.0119	RPL22
ZBED1		enzyme			0.0119	RPL12
MAPT		other			0.0135	RPL19,RPL23,RPS16,TPT1
EIF4E		translation regulator			0.0136	RPL19,RPL35,RPL37A
ERG		transcription regulator			0.0136	RPL22,RPL27A,RPS11
GNRH2		other			0.0142	RPLP2
RHEB		enzyme			0.0142	RPS16
NKX2-3		transcription regulator			0.0158	RPL23,RPS23,RPS29
GAST		other			0.016	RPL35A,RPS19
MXD1		transcription regulator			0.016	Rpl23a,RPL30
PAX3-FOXO1		fusion gene/product			0.0166	RPL26,RPL35,RPL6
CNBP		transcription regulator			0.0236	RPS17
STX3		transporter			0.0236	RPL30
MCL1		transporter			0.0259	TPT1
RFX2		transcription regulator			0.0259	RPL30
LY-2510924		biologic drug			0.0283	RPL23
SLC9A1		ion channel			0.0283	TPT1
ciprofloxacin		chemical drug			0.0289	RPL12,RPS18
STOX1		other			0.0329	RPL17
GATA1		transcription regulator			0.0331	RPL22,RPL27A,RPS11
TP53		transcription regulator		1.151	0.0383	NDRG4,RPL12,Rpl36,RPS12,RPS16,RPS18,RPS19,RPS20,RPS25
CNOT6L		enzyme			0.0398	RPL35
glutamyl-Se-methylselenocysteine		chemical - endogenous mammalian			0.0398	RPS11
TAF1		transcription regulator			0.0421	RPL31
methapyrilene		chemical drug			0.0435	RPL13A,RPS8
RFX1		transcription regulator			0.0467	RPL30
RFX3		transcription regulator			0.0467	RPL30
2-mercaptoacetate		chemical drug			0.049	TPT1
FOS		transcription regulator		-1	0.0491	RPL39,RPS18,RPS24,Uba52

## Sheet: M27_C4vC0
© 2000-2020 QIAGEN. All rights reserved.
Upstream Regulator	Expr Log Ratio	Molecule Type	Predicted Activation State	Activation z-score	p-value of overlap	Target molecules in dataset	Mechanistic Network
HRAS		enzyme		1	2.01e-08	ANXA3,CCND2,CEBPB,CSF1,EFEMP1,EIF4EBP1,FLRT2,GJB3,HSPB1,MFGE8,SHROOM3,TGFB3	HRAS,NFkB (complex),TP53,WT1
IgG		complex		-1.949	2.69e-08	ADGRG1,CCND2,CEBPB,CSF1,ETS2,EZR,HSPB1,PDPN	IFNG,IgG,NFKB1,NFkB (complex)
dexamethasone		chemical drug	Activated	2.178	9.11e-08	ANXA3,BIRC2,CCND2,CEBPB,CSF1,EIF1AX,EIF4EBP1,ETS2,EZR,FLRT2,FOXJ1,IL18R1,IL6ST,ITGA3,JAG1,MFGE8,RARG,TGFB3,VNN1	ERK1/2,IGF1,IL4,NFKBIA,NFkB (complex),STAT6,dexamethasone
AGT		growth factor	Activated	2.089	1.17e-06	ANXA3,CCND2,EFEMP1,HSPB1,HSPG2,IL18R1,IL6ST,JAG1,TGFB3	AGT,MAP2K1/2,NFkB (complex)
TGFB1		growth factor	Activated	2.412	1.26e-06	AHNAK,CCND2,CEBPB,CSF1,EIF4EBP1,FOXJ1,HSPB1,HSPG2,ITGA3,JAG1,PDPN,RARG,SDC4,TACC2,TGFB3,VAT1	HIF1A,NFKB1,NFKBIA,NFkB (complex),NOTCH1,SMAD4,TGFB1,TNF,TP53,Tgf beta
OSM		cytokine		0.259	3.42e-06	ANXA3,CCND2,EIF4EBP1,ERBB3,ETS2,IL6ST,JAG1,PDPN,RARG
BRAF		kinase			4.73e-06	BCAM,BIRC2,CEBPB,CSF1,ERBB3,HSPG2	Akt,BRAF,NOTCH1
ERBB2		kinase		1.604	5.15e-06	AHNAK,BCAM,CCND2,CEBPB,EIF4EBP1,ERBB3,HSPB1,IL6ST,JAG1,RARG,SHROOM3
FGF10		growth factor		1.982	6.56e-06	AHNAK,ANXA3,CEBPB,VNN1
APOE		transporter			7.84e-06	ADGRG1,BCAM,CCND2,CSF1,HSPG2,ITGA3,SDC4	APOE,NFKB1,NFKBIA,NFkB (complex)
beta-estradiol		chemical - endogenous mammalian		-0.492	9.81e-06	ANXA3,CCND2,CEBPB,DDR1,EIF4EBP1,ERBB3,GJB3,HSPB1,IL6ST,JAG1,NFE2L3,PXDN,SDC4,TGFB3,TUBA1B,VNN1	D-glucose,ESR1,NFkB (complex),beta-estradiol
WNT1		cytokine			1.06e-05	CCND2,EIF1AX,EIF4EBP1,ETS2,RARG
IFNG		cytokine		1.009	1.1e-05	ADGRG1,BIRC2,CCND2,CEBPB,CSF1,ETS2,FLRT2,HSPB1,HSPG2,IL18R1,JAG1,NFE2L3,SDC4	HIF1A,IFNG,IL1B,NFKB1,NFKBIA,NFkB (complex),NOTCH1,SMAD4,TNF,TP53,Tgf beta
D-glucose		chemical - endogenous mammalian		0.478	1.3e-05	ANXA3,CCND2,CEBPB,HSPB1,IL6ST,JAG1,SEPHS2,TGFB3,TRPV4	D-glucose,HIF1A,MAP2K1/2,NFKB1,NFKBIA,NFkB (complex),Pdgf (complex),TP53
estrogen receptor		group		0	2.04e-05	CCND2,ERBB3,GJB3,ITGA3,JAG1,TGFB3
miR-199a-5p (and other miRNAs w/seed CCAGUGU)		mature microrna	Inhibited	-2	2.26e-05	BCAM,DDR1,ITGA3,JAG1
EGF		growth factor	Activated	2.157	2.32e-05	BIRC2,CCND2,CEBPB,ETS2,EZR,FOXJ1,PDPN,TGFB3	EGF,ERK1/2,NFKBIA,PGR
NOTCH1		transcription regulator		-0.6	2.64e-05	BIRC2,CCND2,CEBPB,ERBB3,JAG1,TGFB3	HIF1A,NFKB1,NFKBIA,NFkB (complex),NOTCH1,TNF,TP53
raloxifene		chemical drug		0.371	3.7e-05	ANXA3,CSF1,ERBB3,PXDN,TGFB3
APP		other			3.71e-05	CCND2,CD151,CSF1,ETS2,HSPB1,HSPG2,IL6ST,ITGA3,SDC4,TUBA1B	APOE,APP,NFKB1
maslinic acid		chemical - endogenous non-mammalian			3.89e-05	CCND2,CEBPB,IL6ST,ITGA3
STAT6		transcription regulator		-1	3.95e-05	AHNAK,BIRC2,CCND2,FLRT2,IL18R1,IL6ST,JAG1	IL4,NFkB (complex),STAT6
dihydrotestosterone		chemical - endogenous mammalian		0.98	4.18e-05	CCND2,EIF4EBP1,HSPB1,IL6ST,JAG1,RARG,STBD1,TACC2
WNT3A		cytokine		0.896	4.35e-05	CCND2,CEBPB,ERBB3,JAG1,SDC4,TGFB3
IL1B		cytokine	Activated	2.229	4.46e-05	BIRC2,CEBPB,CSF1,EIF4EBP1,ETS2,HSPB1,HSPG2,IL18R1,SDC4,TGFB3	HIF1A,IFNG,IL1B,NFKB1,NFKBIA,NFkB (complex),NOTCH1,TNF,TP53,docosahexaenoic acid
NFKBIA		transcription regulator		-1.751	4.92e-05	BIRC2,CCND2,CEBPB,CSF1,ITGA3,MFGE8,SDC4	HIF1A,NFKB1,NFKBIA,NFkB (complex),NOTCH1,TNF,TP53
TP53		transcription regulator	Activated	2.426	5.08e-05	ANXA3,BIRC2,CCND2,CEBPB,CSF1,DDR1,EZR,FLRT2,GJB3,HSPB1,HSPG2,SHROOM3,TACC2,TGFB3	HIF1A,NFKB1,NFKBIA,NFkB (complex),TP53,WT1
ERK1/2		group		0.963	5.63e-05	BIRC2,CCND2,CEBPB,EZR,ITGA3,VNN1	ERK1/2,NFKB1,NFKBIA,NFkB (complex)
ASPSCR1-TFE3		fusion gene/product	Activated	2	6.23e-05	ADGRG1,EZR,TACC2,VAT1
ID3		transcription regulator		-0.686	7.6e-05	ADGRG1,CCND2,CEBPB,CSF1,ETS2
NFkB (complex)		complex	Activated	2.764	7.8e-05	BIRC2,CCND2,CEBPB,CSF1,HSPB1,JAG1,SDC4,TGFB3	HIF1A,IL1B,NFKB1,NFKBIA,NFkB (complex),NOTCH1,TNF
wortmannin		chemical - kinase inhibitor		-1.231	8.54e-05	CCND2,CSF1,EIF1AX,ERBB3,EZR
TP63		transcription regulator		1.621	8.58e-05	CCND2,ERBB3,ITGA3,JAG1,MFGE8,NFE2L3,TGFB3
CCND1		transcription regulator		0.447	8.97e-05	AHNAK,CCND2,HSPB1,STBD1,TGFB3,TUBA1B
ABL1		kinase			9.41e-05	CCND2,CSF1,TGFB3	ABL1,HIF1A,NFKB1,NFKBIA,NFkB (complex),TP53
CD44		other			9.79e-05	BCAM,BIRC2,CCND2,ITGA3,SDC4
EIF2AK3		kinase			9.81e-05	BIRC2,CEBPB,EIF4EBP1,ETS2
ID2		transcription regulator		-0.577	0.000107	CCND2,CEBPB,CSF1,ETS2,ITGA3
ERBB3	0.027	kinase	Activated	2	0.000121	CCND2,ERBB3,EZR,GJB3
PTEN		phosphatase		-0.555	0.00014	CEBPB,EIF4EBP1,ERBB3,ETS2,JAG1,SDC4,SEPHS2,VNN1
U0126		chemical - kinase inhibitor		0.022	0.000169	CCND2,CEBPB,EIF1AX,EIF4EBP1,ITGA3,JAG1,TGFB3	FOXO3,IGF1,NFKBIA,U0126,estrogen receptor
NPM1-ALK		fusion gene/product			0.00017	CCND2,CEBPB
Akt		group		0.728	0.000186	BCAM,BIRC2,CCND2,CEBPB,ERBB3,HSPG2	Akt,NFkB (complex),NOTCH1
ESR1		ligand-dependent nuclear receptor		0.749	0.0002	AHNAK,ANXA3,CEBPB,CLIC3,EFEMP1,ERBB3,GJB3,IL6ST,JAG1,NFE2L3,TGFB3
CX3CL1		cytokine			0.000243	CSF1,ERBB3,MFGE8,TGFB3
E. coli B5 lipopolysaccharide		chemical - endogenous non-mammalian		0.943	0.00027	BIRC2,ETS2,IL6ST,SEPHS2,TGFB3
CLEC4G		other			0.000271	CSF1,MFGE8,TGFB3
MYC		transcription regulator	Activated	2.217	0.000287	BIRC2,CCND2,CD151,EFEMP1,EIF4EBP1,EZR,HSPB1,ITGA3,RARG,SEPHS2
KRAS		enzyme		-1	0.000288	AHNAK,BCAM,CEBPB,EFEMP1,HSPB1,HSPG2,PDPN,SDC4
IL4		cytokine		0.97	0.000315	AHNAK,BIRC2,CCND2,CSF1,FLRT2,IL18R1,IL6ST,JAG1,TGFB3	HIF1A,IFNG,IL4,NFKB1,NFKBIA,NFkB (complex),NOTCH1,STAT6,TNF,TP53
lipopolysaccharide		chemical drug	Activated	3.083	0.000328	ANXA3,BIRC2,CCND2,CEBPB,CLIC3,CSF1,ETS2,HSPB1,IL18R1,IL6ST,ITGA3,JAG1,SDC4	HIF1A,IFNG,IL1B,NFKB1,NFKBIA,NFkB (complex),NOTCH1,TNF,TP53,lipopolysaccharide
SMAD7		transcription regulator		-1.98	0.000352	BIRC2,EFEMP1,EIF4EBP1,TGFB3
PRL		cytokine		1.432	0.000391	ANXA3,ERBB3,MFGE8,PDPN,TUBA1B
EGLN1		enzyme			0.000419	JAG1,SDC4,TGFB3	EGLN1,HIF1A,NFKB1,NFKBIA,NFkB (complex),TP53
butyric acid		chemical - endogenous mammalian			0.000422	ADGRG1,CCND2,CSF1,DDR1,HSPG2,IL18R1
COL9A1		other			0.000427	HSPG2,MFGE8
SOX7		transcription regulator			0.000438	ADGRG1,HSPG2,MFGE8
SMARCA4		transcription regulator			0.000475	ADGRG1,AHNAK,CEBPB,CSF1,ETS2,ITGA3,MFGE8
COLQ		other			0.000477	HSPG2,SDC4,TGFB3
Tgf beta		group		1.264	0.00051	CCND2,CEBPB,CSF1,HSPG2,JAG1	HIF1A,IFNG,NFKB1,NFKBIA,NFkB (complex),NOTCH1,SMAD4,TGFB1,TNF,TP53,Tgf beta
CDK4/6		group			0.000519	AHNAK,HSPB1,TUBA1B
ITGB3		transmembrane receptor			0.000519	BIRC2,CSF1,ITGA3
androgen		chemical drug			0.000525	ERBB3,SDC4,TACC2,VNN1
PGR		ligand-dependent nuclear receptor		1.172	0.000533	BIRC2,CEBPB,EIF1AX,EZR,TGFB3
PTH		other			0.000549	AHNAK,CEBPB,CSF1,SDC4
BMP7		growth factor			0.000598	CEBPB,ERBB3,JAG1,TGFB3
poly rI:rC-RNA		biologic drug		0.896	0.000623	BIRC2,CCND2,CEBPB,CSF1,EZR,JAG1,SDC4	HIF1A,IFNG,NFKB1,NFKBIA,NFkB (complex),NOTCH1,TNF,TP53,poly rI:rC-RNA
HOXA9		transcription regulator			0.000679	ADGRG1,ETS2,SDC4,WSB1
trans-hydroxytamoxifen		chemical drug		-1	0.000679	ANXA3,ERBB3,PXDN,TGFB3
MAP2K1/2		group			0.000709	CCND2,HSPB1,JAG1	HIF1A,MAP2K1/2,NFKB1,NFKBIA,NFkB (complex),TP53
batimastat		chemical - protease inhibitor			0.000713	CEBPB,SDC4
SPP1		cytokine		1	0.000722	ETS2,ITGA3,JAG1,VAT1
JUN		transcription regulator		1.498	0.000722	BIRC2,CCND2,CSF1,EZR,PXDN,RARG
PD173074		chemical reagent			0.000736	ADGRG1,CCND2,CEBPB
ionomycin		chemical reagent			0.000782	AHNAK,CCND2,EIF4EBP1,ETS2
ITGA6		transmembrane receptor			0.000796	CCND2,ITGA3
TBXT		transcription regulator			0.000796	CD151,ITGA3
PRKCD		kinase		0.849	0.000814	BIRC2,CAMSAP1,CEBPB,ETS2
CDH1		other			0.000878	BIRC2,EIF4EBP1,ERBB3
EML4-ALK		fusion gene/product			0.000883	ERBB3,TGFB3
PPP1R13L		transcription regulator			0.000883	CCND2,ITGA3
SMARCD3		transcription regulator			0.000883	CD151,ITGA3
dactolisib		chemical drug			0.000883	EIF4EBP1,ERBB3
CCN1		other			0.000908	CCND2,IL6ST,ITGA3
Z-LLL-CHO		chemical - protease inhibitor	Activated	2.207	0.00092	CCND2,CEBPB,EIF4EBP1,HSPB1,RARG	MYC,TCF3,Z-LLL-CHO
Mek		group		-0.747	0.000932	BCAM,CCND2,DDR1,ERBB3,HSPB1
R5020		chemical reagent			0.00107	CEBPB,ERBB3,RARG
SLC9A3R1		other			0.00107	ERBB3,EZR
LY294002		chemical - kinase inhibitor		-0.829	0.00107	CCND2,CEBPB,EIF1AX,ERBB3,ETS2,FLRT2
tetradecanoylphorbol acetate		chemical drug		1.198	0.0011	CAMSAP1,CCND2,CSF1,EIF4EBP1,ETS2,EZR,IL18R1,PDPN,SDC4	EGR1,HIF1A,NFKB1,NFKBIA,NFkB (complex),NOTCH1,TNF,tetradecanoylphorbol acetate
forskolin		chemical toxicant		-0.311	0.00113	ADGRG1,CCND2,CEBPB,CSF1,EZR,ITGA3,MFGE8	ERK1/2,IGF1,NFKB1,NFKBIA,NFkB (complex),forskolin
FGFR1		kinase			0.00121	CCND2,EIF1AX,EIF4EBP1
FN1		enzyme			0.00124	CEBPB,DLGAP4,GJB3,SDC4
TCF3		transcription regulator		-1	0.00135	CCND2,EIF4EBP1,ETS2,IL18R1,RARG
sirolimus		chemical drug		-1.941	0.00138	CCND2,CD151,CEBPB,CSF1,EIF1AX,ERBB3
Pdgf (complex)		complex			0.00144	CCND2,JAG1,TGFB3	ABL1,HIF1A,NFKB1,NFKBIA,NFkB (complex),Pdgf (complex),TP53
TAF4B		transcription regulator			0.0015	CCND2,TGFB3
tetrachlorodibenzodioxin		chemical toxicant		1.929	0.0015	CEBPB,ERBB3,ETS2,JAG1,TGFB3	ESR1,HIF1A,NFKB1,NFKBIA,NFkB (complex),NOTCH1,TNF,tetrachlorodibenzodioxin
PAX3-FOXO1		fusion gene/product		0	0.00152	CCND2,CSF1,ERBB3,IL6ST
Growth hormone		group		1.96	0.00173	CCND2,CEBPB,DDR1,TGFB3
WT1		transcription regulator			0.00178	CSF1,EZR,HSPG2,TGFB3
FOXO4		transcription regulator			0.00185	ANXA3,CCND2,JAG1
ACTL6A		other			0.00186	CCND2,ETS2
crizotinib		chemical drug			0.00186	ERBB3,TGFB3
VDR		transcription regulator		-0.105	0.00187	CCND2,CEBPB,CSF1,WSB1
BCL6		transcription regulator		-0.218	0.0019	CCND2,CD151,CSF1,ITGA3
bisindolylmaleimide I		chemical - kinase inhibitor			0.00194	CCND2,EIF4EBP1,TGFB3	NR4A3,bisindolylmaleimide I
TP73		transcription regulator		-0.277	0.00205	BIRC2,DIMT1,FOXJ1,JAG1,PDPN
SMAD4		transcription regulator		1.997	0.00207	CCND2,CSF1,EIF4EBP1,JAG1
ADAMTS18		peptidase			0.00213	ITGA3,TGFB3
2-nitrophenyl EGTA		chemical reagent			0.00221	AHNAK
MAP7		other			0.00221	TRPV4
NXF3		transporter			0.00221	TGFB3
PSMA2		peptidase			0.00221	CCND2
PSMC4		peptidase			0.00221	CCND2
PSMD6		enzyme			0.00221	CCND2
gestodene		chemical drug			0.00221	TGFB3
cholecalciferol		chemical - endogenous mammalian			0.00225	ADGRG1,CEBPB,CSF1
Lh		complex			0.00226	ADGRG1,CCND2,EZR,ITGA3	ERK1/2,Lh,NFKBIA
TNF		cytokine		1.569	0.00229	BIRC2,CCND2,CEBPB,CSF1,ETS2,HSPG2,IL18R1,JAG1,PDPN,SDC4,TGFB3	EGF,HIF1A,IFNG,IL1B,NFKB1,NFKBIA,NFkB (complex),PGR,SMAD4,TNF,TP53,Tgf beta
IKZF1		transcription regulator		-1.977	0.0023	CCND2,IL18R1,IL6ST,SHROOM3
MMP14		peptidase			0.00241	BCAM,JAG1
PPARD		ligand-dependent nuclear receptor			0.00243	CCND2,CEBPB,MFGE8,STBD1
CSF1	0.075	cytokine		1.93	0.00254	CCND2,CSF1,ETS2,IL6ST	CSF1,NPM1
daporinad		chemical drug			0.00256	CEBPB,ETS2
tretinoin		chemical - endogenous mammalian		0.795	0.00262	AHNAK,BIRC2,CCND2,CEBPB,EIF4EBP1,HSPB1,IL6ST,RARG,TGFB3,WSB1	HIF1A,NFKB1,NFKBIA,NFkB (complex),TP53,tretinoin
MIR17HG		other			0.00265	HSPG2,IL6ST,JAG1
progesterone		chemical - endogenous mammalian		-0.651	0.00271	CEBPB,CSF1,ERBB3,EZR,PDPN,TGFB3
SU6656		chemical toxicant			0.00271	CSF1,ETS2
IL13		cytokine		-0.283	0.00272	BIRC2,CEBPB,EZR,JAG1,VNN1	ERK1/2,IL13,NFKBIA
HIF1A		transcription regulator		1.109	0.0028	BIRC2,CSF1,HSPB1,SDC4,TGFB3	HIF1A,NFKB1,NFKBIA,NFkB (complex),NOTCH1,TNF,TP53
RUNX3		transcription regulator			0.00284	IL6ST,JAG1,PXDN
Ap2		group			0.00286	ERBB3,TGFB3
GTF2B		transcription regulator			0.00286	CCND2,ETS2
Klrk1		transmembrane receptor			0.00286	CSF1,IL18R1
asoprisnil		chemical drug			0.00286	TGFB3,VNN1
KLF11		transcription regulator			0.0029	CEBPB,ITGA3,TGFB3
F2		peptidase		1.964	0.00291	BIRC2,CCND2,SDC4,TGFB3	F2,HIF1A,NFKB1,NFKBIA,NFkB (complex),NOTCH1,TNF,TP53
dimethyl sulfoxide		chemical drug			0.00297	CCND2,CEBPB,EIF4EBP1
HDL-cholesterol		complex			0.00302	CEBPB,EIF4EBP1
MMP2		peptidase			0.00302	IL6ST,ITGA3
NPM1		transcription regulator			0.00302	CSF1,IL6ST
miR-34a-5p (and other miRNAs w/seed GGCAGUG)		mature microrna			0.00316	EFEMP1,ETS2,JAG1
IL10		cytokine		-0.456	0.00324	CCND2,CSF1,ETS2,FLRT2,IL6ST	CSF1,IL10,IL4,NFkB (complex),NPM1,STAT6
MET		kinase			0.0033	CCND2,HSPB1,ITGA3
JAG2		growth factor			0.00335	CEBPB,JAG1
CASR		g-protein coupled receptor			0.00344	CCND2,CSF1,WSB1
1,25-dihydroxyvitamin D		chemical drug			0.00353	CCND2,CSF1	1,25-dihydroxyvitamin D,VDR
ITGB1		transmembrane receptor			0.00358	EIF4EBP1,HSPG2,ITGA3
PGF		growth factor			0.0037	BIRC2,ETS2
SB203580		chemical - kinase inhibitor		-0.492	0.00372	ANXA3,CEBPB,EFEMP1,ETS2,TGFB3
SYVN1		transporter			0.00388	CD151,HSPB1,ITGA3
ZBTB16		transcription regulator			0.00388	IL18R1,IL6ST,RARG
CSF1R		kinase			0.00388	CCND2,CSF1	CSF1,CSF1R,NPM1
FASLG		cytokine			0.00388	BIRC2,TGFB3
everolimus		chemical drug			0.00388	CCND2,CEBPB
NFKB1		transcription regulator		1.067	0.0039	CCND2,CSF1,JAG1,SDC4	HIF1A,IFNG,NFKB1,NFKBIA,NFkB (complex),NOTCH1,TNF,TP53
GATA1		transcription regulator			0.00399	CCND2,ETS2,IL6ST,USP16
Laminin (complex)		complex			0.00406	ETS2,SDC4
hydrocortisone		chemical - endogenous mammalian			0.00411	CCND2,CEBPB,EZR	EGF,PGR,hydrocortisone
IL7		cytokine			0.00419	CCND2,CSF1,IL18R1	IL4,IL7,NFkB (complex),STAT6
IGF1		growth factor		1.067	0.00424	CCND2,CEBPB,CSF1,EIF1AX,ITGA3	IGF1,NFKB1,NFKBIA,NFkB (complex)
miR-200b-3p (and other miRNAs w/seed AAUACUG)		mature microrna			0.00425	GJB3,JAG1
Tnf (family)		group			0.00435	BIRC2,CSF1,JAG1	HIF1A,NFKB1,NFKBIA,NFkB (complex),TP53,Tnf (family)
CDK10		kinase			0.00441	ETS2
E-c-HDMAPP		chemical reagent			0.00441	CCND2
GMNC		other			0.00441	FOXJ1
HOMER3		other			0.00441	CEBPB
LFM-A13		chemical - kinase inhibitor			0.00441	CCND2
MYL2		other			0.00441	CD151
PS-K		chemical drug			0.00441	BIRC2
Pdgfra-Pdgfrb		complex			0.00441	CSF1
SENP5		peptidase			0.00441	BIRC2
TRIB2		kinase			0.00441	CEBPB
VANGL2		other			0.00441	SDC4
chalcone-24		chemical reagent			0.00441	BIRC2
mir-652		microrna			0.00441	JAG1
mir-663		microrna			0.00441	HSPG2
trichosanthin		chemical drug			0.00441	JAG1
troxerutin		chemical drug			0.00441	CEBPB
GFI1		transcription regulator			0.00443	CCND2,CSF1,ETS2
FLT3		kinase			0.00444	CCND2,CEBPB
PCGF2		transcription regulator			0.00444	CCND2,JAG1
KLF4		transcription regulator			0.0046	CCND2,EFEMP1,HSPB1,TGFB3
PRKACA		kinase			0.00464	CCND2,CEBPB
RBPJ		transcription regulator			0.00468	CSF1,JAG1,TGFB3	IL4,NFkB (complex),RBPJ,STAT6
C11orf95-RELA		fusion gene/product			0.00484	CSF1,SDC4
Hsp27		group			0.00484	CSF1,EIF4EBP1
EGFR		kinase			0.0049	BCAM,CEBPB,ERBB3,HSPB1,JAG1
ADRA1B		g-protein coupled receptor			0.00504	CEBPB,IL6ST
ADRA1D		g-protein coupled receptor			0.00504	CEBPB,IL6ST
zVAD-FMK		chemical - protease inhibitor			0.00504	BIRC2,IL6ST
LTBR		transmembrane receptor			0.00525	MFGE8,PDPN
tamoxifen		chemical drug			0.00544	AHNAK,CLIC3,EIF4EBP1,ERBB3
Hedgehog		group			0.00546	CCND2,JAG1
INS		other			0.00558	CEBPB,EIF4EBP1,ERBB3
VCAN		other			0.00558	CEBPB,ITGA3,TGFB3
ADRA1A		g-protein coupled receptor			0.00567	CEBPB,IL6ST
DGCR8		enzyme			0.00567	ERBB3,JAG1
PDGF BB		complex		1.246	0.00599	CEBPB,CSF1,ETS2,TGFB3
TCF7L2		transcription regulator		1.953	0.00599	ADGRG1,CCND2,ERBB3,JAG1
IGFBP2		other			0.00612	EFEMP1,TGFB3
DNMT3A		enzyme			0.00627	EFEMP1,IL18R1,SDC4
CEBPE		transcription regulator			0.00634	CCND2,CEBPB
JAG1	0.054	growth factor			0.00634	CCND2,TGFB3
MAP3K1		kinase			0.00634	BIRC2,HSPB1
NKX3-1		transcription regulator			0.00634	SDC4,VNN1
Ccl2		cytokine			0.00657	CSF1,SDC4
3,4-dihydroxybenzaldehyde		chemical - endogenous non-mammalian			0.0066	CCND2
AHNAK	0.189	other			0.0066	CCND2
CARD8		other			0.0066	BIRC2
CK1		group			0.0066	BIRC2
HERC2		enzyme			0.0066	USP16
NEURL1		enzyme			0.0066	JAG1
OSR2		transcription regulator			0.0066	TGFB3
PSMC5		transcription regulator			0.0066	CCND2
WASF1		other			0.0066	EZR
ZSCAN10		transcription regulator			0.0066	EIF1AX
ixabepilone		chemical drug			0.0066	BIRC2
mir-297		microrna			0.0066	CCND2
polyhydroxyethyl methacrylate		chemical reagent			0.0066	EZR
cardiotoxin		chemical - other			0.00668	CCND2,CSF1,EZR
docosahexaenoic acid		chemical drug			0.00668	CEBPB,CSF1,TGFB3	HIF1A,IL1B,NFKB1,NFKBIA,NFkB (complex),TP53,docosahexaenoic acid
FOXO3		transcription regulator			0.00672	ANXA3,CCND2,EIF4EBP1,JAG1
IL3		cytokine			0.00679	CCND2,CSF1,EIF1AX,PDPN
MYB		transcription regulator			0.00723	FOXJ1,IL18R1,SDC4
PIM1		kinase			0.00728	CCND2,ERBB3
IL11		cytokine			0.00778	EZR,IL6ST
PTGES		enzyme			0.00778	ERBB3,EZR
cadmium chloride		chemical toxicant			0.00778	HSPB1,TGFB3	HIF1A,NFkB (complex),cadmium chloride
15-deoxy-delta-12,14 -PGJ 2		chemical - endogenous mammalian			0.00791	BIRC2,CCND2,HSPB1	15-deoxy-delta-12,14 -PGJ 2,HIF1A,MYC,NFKB1,NFKBIA,NFkB (complex),TP53
PTGS2		enzyme			0.00803	ERBB3,EZR,VNN1
let-7a-5p (and other miRNAs w/seed GAGGUAG)		mature microrna			0.00803	ADGRG1,CCND2,PXDN
TNFRSF8		transmembrane receptor			0.00803	AHNAK,PDPN
curcumin		chemical drug		-1.067	0.00826	BIRC2,CCND2,CEBPB,TACC2	Akt,ERK1/2,NFKB1,NFKBIA,NFkB (complex),NOTCH1,TP53,WT1,curcumin
CG		complex		1.459	0.00849	CCND2,CEBPB,EFEMP1,SDC4	CG,NFKB1,NFKBIA,NFkB (complex)
EGR1		transcription regulator			0.00851	CCND2,CSF1,EIF4EBP1
HOXD10		transcription regulator			0.00855	EZR,ITGA3
sunitinib		chemical drug			0.00855	CCND2,ITGA3
ATF4		transcription regulator			0.00863	CEBPB,EIF4EBP1,JAG1
ASCC1		transcription regulator			0.0088	BIRC2
CSTB		peptidase			0.0088	CEBPB
FASTK		kinase			0.0088	BIRC2
FICD		enzyme			0.0088	HSPB1
LAMB1		other			0.0088	JAG1
MYBPC3		other			0.0088	MYBPC2
NSC719239		chemical drug			0.0088	ITGA3
Nppb		other			0.0088	TGFB3
PD 180970		chemical - kinase inhibitor			0.0088	CCND2
PTCH2		transmembrane receptor			0.0088	JAG1
Rsk		group			0.0088	CEBPB
UTP3		other			0.0088	CCND2
ZKSCAN3		transcription regulator			0.0088	CCND2
ZNF24		transcription regulator			0.0088	CCND2
arzoxifene		chemical drug			0.0088	TGFB3
diamide		chemical reagent			0.0088	SDC4
glucuronyl glucosamine glycan sulfate		chemical drug			0.0088	HSPG2
lanatoside C		chemical - endogenous non-mammalian			0.0088	CCND2
proanthocyanidin derivative		chemical - other			0.0088	MFGE8
vildagliptin		chemical drug			0.0088	TRPV4
NR4A3		ligand-dependent nuclear receptor			0.00881	CCND2,TGFB3
napabucasin		chemical drug			0.00881	DDR1,JAG1
BCL2L1		other			0.00908	BIRC2,ITGA3
NEUROG1		transcription regulator			0.00908	CCND2,PXDN
bleomycin		chemical drug			0.00926	FOXJ1,JAG1,SDC4
hydroxyurea		chemical drug			0.00935	BCAM,CCND2
PAX3		transcription regulator			0.00938	CD151,HSPG2,PXDN
TREM1		transmembrane receptor			0.00951	CEBPB,CSF1,ETS2	HIF1A,IL1B,NFkB (complex),TREM1
thapsigargin		chemical toxicant			0.00978	BIRC2,CEBPB,EIF4EBP1	ATF4,HIF1A,IL1B,NFkB (complex),thapsigargin
Collagen type I (complex)		complex			0.0099	EIF4EBP1,ITGA3
miR-145-5p (and other miRNAs w/seed UCCAGUU)		mature microrna			0.0099	AHNAK,DDR1
SPDEF		transcription regulator			0.0102	FOXJ1,ITGA3
calcitriol		chemical drug		1.059	0.0102	BIRC2,CEBPB,CSF1,ERBB3,WSB1
sulindac sulfide		chemical drug			0.0108	BCAM,CEBPB
KDM1A		enzyme			0.0109	CCND2,NFE2L3,RARG
ADAM9		peptidase			0.011	ITGA3
Cathepsin		group			0.011	CCND2
Cxcl3		cytokine			0.011	CEBPB
DR1		transcription regulator			0.011	ETS2
Foxp2		transcription regulator			0.011	PDPN
GTF2H4		transcription regulator			0.011	CCND2
KCTD11		other			0.011	CCND2
LGALS12		other			0.011	CEBPB
NACA		transcription regulator			0.011	PDPN
PSAP		enzyme			0.011	BIRC2
SENP6		peptidase			0.011	BIRC2
SNHG3		other			0.011	CCND2
ZDHHC2		enzyme			0.011	CD151
EIF4E		translation regulator			0.011	BIRC2,CEBPB,EIF4EBP1
CREBBP		transcription regulator			0.011	CCND2,CSF1,IL18R1,SDC4
FBXW7		enzyme			0.011	HSPB1,NFE2L3
FGF7		growth factor			0.011	CSF1,NFE2L3
RC3H1		enzyme			0.011	HSPB1,IL6ST
GLI1		transcription regulator			0.0113	CCND2,CSF1,EZR
PIK3CA		kinase			0.0113	CEBPB,JAG1
EZH2		transcription regulator			0.0115	CCND2,EZR,FOXJ1,IL18R1
STAT3		transcription regulator		1.725	0.0117	CCND2,CEBPB,IL18R1,IL6ST,JAG1
simvastatin		chemical drug			0.0117	ANXA3,CCND2,SDC4
NTRK2		kinase			0.0119	CCND2,JAG1
miR-141-3p (and other miRNAs w/seed AACACUG)		mature microrna			0.0119	GJB3,JAG1
FSH		complex			0.012	ADGRG1,CCND2,EZR,ITGA3
Il3		cytokine			0.0122	CCND2,CSF1
tetracycline		chemical drug			0.0122	CSF1,JAG1
LIF		cytokine			0.0123	AHNAK,CEBPB,IL6ST
HSF1		transcription regulator			0.0125	CEBPB,EFEMP1,HSPB1
tunicamycin		chemical - endogenous non-mammalian			0.0125	BIRC2,CEBPB,EIF4EBP1
PLG		peptidase			0.0126	CSF1,MFGE8
PRKCE		kinase			0.0129	CEBPB,IL6ST
PRNP		other			0.0129	ETS2,HSPB1
methylprednisolone		chemical drug	Activated	2.213	0.0131	ANXA3,GJB3,IL6ST,SDC4,SEPHS2
EFEMP2		other			0.0132	EFEMP1
FES		kinase			0.0132	CSF1
GSK690693		chemical drug			0.0132	ERBB3
LRIG1		other			0.0132	ERBB3
MUSK		kinase			0.0132	ERBB3
N-hexanoylhomoserine lactone		chemical - endogenous non-mammalian			0.0132	CSF1
PIWIL4		other			0.0132	TGFB3
RO4929097		chemical drug			0.0132	JAG1
SOX18		transcription regulator			0.0132	IL6ST
TFF2		other			0.0132	CCND2
USP48		peptidase			0.0132	CCND2
UTRN		transmembrane receptor			0.0132	MYBPC2
YWHAB		other			0.0132	BCAM
Z-VEID-FMK		chemical reagent			0.0132	CCND2
lumefantrine		chemical drug			0.0132	HSPB1
zofenopril		chemical drug			0.0132	CSF1
MMP9		peptidase			0.0132	JAG1,SDC4
PLX5622		chemical drug			0.0132	CSF1,IL6ST
fenretinide		chemical drug			0.0132	BIRC2,RARG
STAT4		transcription regulator			0.0134	AHNAK,IL18R1,TGFB3
OGA		enzyme		0	0.0138	CD151,CEBPB,ERBB3,IL6ST
PPP3CA		phosphatase			0.0138	PDPN,SDC4
MTPN		transcription regulator			0.0142	CCND2,TGFB3
FOXA2		transcription regulator			0.0142	BIRC2,ITGA3,RARG
epigallocatechin-gallate		chemical drug			0.0142	BIRC2,CEBPB,IL6ST
GMNN		transcription regulator			0.0145	EFEMP1,FOXJ1
FBXO32		enzyme			0.0148	CCND2,ITGA3
3,4,5,3',4'-pentachlorobiphenyl		chemical toxicant			0.0151	CCND2,ETS2
AKIRIN2		other			0.0153	CCND2
AP20187		chemical reagent			0.0153	CEBPB
B-cell receptor		complex			0.0153	CCND2
CAPNS1		peptidase			0.0153	CCND2
CUL1		enzyme			0.0153	CCND2
DAB1		other			0.0153	ITGA3
FIRRE		other			0.0153	CSF1
Hmgb2 (includes others)		transcription regulator			0.0153	TGFB3
IER3		other			0.0153	BIRC2
MYCBP		transcription regulator			0.0153	CCND2
PHIP		other			0.0153	CCND2
RASSF8		other			0.0153	TGFB3
SERPINC1		enzyme			0.0153	HSPG2
ZNF100		transcription regulator			0.0153	TGFB3
ZNF254		transcription regulator			0.0153	TGFB3
ZNF429		transcription regulator			0.0153	TGFB3
ZNF43		transcription regulator			0.0153	TGFB3
ZNF431		transcription regulator			0.0153	TGFB3
ZNF528		other			0.0153	TGFB3
ZNF665		other			0.0153	TGFB3
ZNF708		other			0.0153	TGFB3
ZNF85		transcription regulator			0.0153	TGFB3
acolbifene		chemical drug			0.0153	TGFB3
murabutide		chemical reagent			0.0153	CEBPB
phlorizin		chemical - endogenous non-mammalian			0.0153	EIF4EBP1
LYN		kinase			0.0155	CSF1,TGFB3
PIK3R1		kinase			0.0155	CCND2,TGFB3
TFRC		transporter			0.0158	ADGRG1,TGFB3
filgrastim		biologic drug		1.98	0.0162	ANXA3,ETS2,IL18R1,VNN1
Hsp90		group			0.0165	CCND2,ERBB3
IL15		cytokine		1.969	0.0167	CCND2,CEBPB,CSF1,IL18R1
gentamicin		chemical drug			0.017	CEBPB,HSPB1,VAT1
RASSF1		other			0.0172	CCND2,EFEMP1
bortezomib		chemical drug			0.0174	BIRC2,CCND2,IL6ST
ADGRF5		g-protein coupled receptor			0.0175	CSF1
BMP5		growth factor			0.0175	CCND2
DIABLO		other			0.0175	BIRC2
GCS-100		chemical drug			0.0175	CCND2
IL-2R		complex			0.0175	CCND2
LAMA4		enzyme			0.0175	JAG1
LTBP4		growth factor			0.0175	TGFB3
MTBP		other			0.0175	CCND2
NEU3		enzyme			0.0175	CLIC3
OTUB1		enzyme			0.0175	CCND2
RNF41		enzyme			0.0175	ERBB3
SENP7		peptidase			0.0175	BIRC2
TFIIA		complex			0.0175	CCND2
Vhl		complex			0.0175	BIRC2
ZNF91		transcription regulator			0.0175	TGFB3
domoic acid		chemical toxicant			0.0175	CEBPB
evofosfamide		chemical drug			0.0175	CCND2
hypochlorous acid		chemical drug			0.0175	ITGA3
IL1A		cytokine			0.0177	BIRC2,CSF1,HSPG2
Interferon alpha		group		1.858	0.018	CCND2,IL18R1,IL6ST,NFE2L3
ADAM10		peptidase			0.0183	CSF1,IL6ST
Immunoglobulin		complex		0.415	0.0183	CCND2,CSF1,ETS2,FOXJ1,IL18R1
FOXO1		transcription regulator			0.0189	ANXA3,EIF4EBP1,ITGA3,JAG1
EHF		transcription regulator			0.0191	JAG1,VNN1
MITF		transcription regulator			0.0193	CD151,ITGA3,VAT1
Dux		other			0.0197	EIF1AX
FBXO42		other			0.0197	CSF1
HUWE1		transcription regulator			0.0197	CCND2
IL12RB2		transmembrane receptor			0.0197	IL18R1
LRRC32		other			0.0197	TGFB3
PI3		other			0.0197	CEBPB
RP 73401		chemical toxicant			0.0197	CEBPB
RPS6KB2		kinase			0.0197	EIF1AX
RUNX1T1		transcription regulator			0.0197	CCND2
SMAD1/5		group			0.0197	CEBPB
SPTAN1		other			0.0197	ITGA3
ST6GAL1		enzyme			0.0197	CCND2
TENM1		transmembrane receptor			0.0197	ERBB3
TPM3		other			0.0197	ITGA3
USP37		peptidase			0.0197	CEBPB
YBX3		transcription regulator			0.0197	ERBB3
tomatidine		chemical - endogenous non-mammalian			0.0197	EIF4EBP1
EIF2AK2		kinase			0.0198	BIRC2,CEBPB
bee venom		chemical - endogenous non-mammalian			0.0198	ETS2,HSPB1
eicosapentenoic acid		chemical drug			0.0198	CEBPB,TGFB3
NFAT5		transcription regulator			0.0202	CLIC3,IL18R1
SOD1		enzyme			0.0205	ETS2,EZR,HSPB1
SOX2		transcription regulator			0.0208	EFEMP1,ETS2,JAG1,TGFB3
cyclic AMP		chemical - endogenous mammalian			0.0211	CCND2,CEBPB,TRPV4
Ca2+		chemical - endogenous mammalian			0.0215	CCND2,CEBPB,ITGA3
2-hydroxy-1-naphthylaldehyde isonicotinoyl hydrazone		chemical reagent			0.0218	CCND2
ANGPTL3		growth factor			0.0218	HSPG2
APC/APC2		group			0.0218	JAG1
ATF5		transcription regulator			0.0218	EIF4EBP1
COP1		enzyme			0.0218	CEBPB
COPS8		other			0.0218	CCND2
IGF2R		transmembrane receptor			0.0218	TGFB3
INCB054329		chemical drug			0.0218	CCND2
Igkv1-117		other			0.0218	CCND2
MIR320		group			0.0218	ETS2
NQO2		enzyme			0.0218	BIRC2
Pvr		other			0.0218	CCND2
RYBP		transcription regulator			0.0218	CCND2
SOX8		transcription regulator			0.0218	VNN1
Shc		group			0.0218	CCND2
TAF5		transcription regulator			0.0218	ETS2
gamma-secretase inhibitor XX		chemical reagent			0.0218	JAG1
retinol acetate		chemical drug			0.0218	RARG
voltage-gated calcium channel		complex			0.0218	CCND2
LHX1		transcription regulator			0.0221	JAG1,PDPN
INHA		growth factor			0.0225	CCND2,ITGA3
KAT5		transcription regulator			0.0225	BIRC2,CCND2
TCF12		transcription regulator			0.0225	IL18R1,RARG
SMAD3		transcription regulator			0.0225	CCND2,JAG1,TGFB3
vorinostat		chemical drug			0.0225	BIRC2,CCND2,MFGE8
CCN2		growth factor			0.0229	BIRC2,SDC4
CST5		other			0.0232	AHNAK,ANXA3,EZR
GLI2		transcription regulator			0.0233	CCND2,JAG1
NR4A1		ligand-dependent nuclear receptor			0.0236	CCND2,CSF1,TGFB3
SPI1		transcription regulator			0.0238	CCND2,CSF1,ETS2
CELF1		translation regulator			0.024	CEBPB
CHRM3		g-protein coupled receptor			0.024	ITGA3
EPHB1		kinase			0.024	IL6ST
FOXD1		transcription regulator			0.024	FOXJ1
LNX2		other			0.024	JAG1
MSI2		other			0.024	IL6ST
RUVBL2		transcription regulator			0.024	CCND2
USP8		peptidase			0.024	ERBB3
kukoamine A		chemical - endogenous non-mammalian			0.024	CEBPB
oligomycin		chemical - endogenous non-mammalian			0.024	CCND2
pepstatin		chemical - protease inhibitor			0.024	CD151
HGF		growth factor			0.0242	ADGRG1,BIRC2,CSF1,IL6ST
IGF1R		transmembrane receptor			0.0243	ANXA3,CEBPB,SDC4
RRP1B		transcription regulator			0.0246	CEBPB,RARG
diethylnitrosamine		chemical toxicant			0.025	BIRC2,ETS2
STAT5B		transcription regulator			0.0252	AHNAK,CCND2,VNN1
MYCN		transcription regulator			0.0254	CCND2,ITGA3,TUBA1B
resiquimod		chemical drug			0.0254	CEBPB,ETS2,HSPB1
mir-1		microrna			0.0258	CCND2,CEBPB
IKBKB		kinase			0.0259	BIRC2,CEBPB,CSF1
LMO2		transcription regulator			0.0259	ADGRG1,CCND2,MFGE8
IL5		cytokine			0.0261	BIRC2,CCND2,EIF4EBP1
STAT5A		transcription regulator			0.0261	CCND2,CEBPB,IL6ST
L-histidine		chemical - endogenous mammalian			0.0262	CEBPB
MAPKAPK3		kinase			0.0262	HSPB1
SH3KBP1		other			0.0262	CCND2
UBA1		enzyme			0.0262	BIRC2
miR-150-5p (and other miRNAs w/seed CUCCCAA)		mature microrna			0.0262	CEBPB
quinacrine		chemical drug			0.0262	BIRC2
roflumilast N-oxide		chemical - endogenous mammalian			0.0262	FOXJ1
CCR2		g-protein coupled receptor			0.0263	CSF1,HSPG2
hydrogen peroxide		chemical - endogenous mammalian	Activated	2	0.0265	CSF1,ETS2,EZR,ITGA3
BTK		kinase			0.0271	CCND2,CEBPB
AR		ligand-dependent nuclear receptor			0.0271	CEBPB,ERBB3,ETS2,TACC2
GH1		growth factor			0.0275	CEBPB,ERBB3
TGFB2		growth factor			0.0275	HSPG2,JAG1
DDIT3		transcription regulator			0.028	JAG1,PDPN
BPIFA1		other			0.0283	FOXJ1
CMKLR1		g-protein coupled receptor			0.0283	CCND2
CSF2RA		transmembrane receptor			0.0283	CCND2
FGF18		growth factor			0.0283	CSF1
JARID2		transcription regulator			0.0283	CCND2
PA2G4		transcription regulator			0.0283	PDPN
POLR3G		enzyme			0.0283	EZR
Ppp2c		group			0.0283	EIF4EBP1
SOX5		transcription regulator			0.0283	HSPG2
TRRAP		transcription regulator			0.0283	CCND2
gambogic acid		chemical - endogenous non-mammalian			0.0283	BIRC2
SP600125		chemical - kinase inhibitor			0.0287	CEBPB,EIF1AX,ITGA3
HNF1B		transcription regulator			0.0293	ITGA3,JAG1
salmonella minnesota R595 lipopolysaccharides		chemical - endogenous non-mammalian			0.0293	ETS2,JAG1
IL6		cytokine			0.0294	AHNAK,CEBPB,CSF1,ETS2,IL6ST
GSK3B		kinase			0.0298	BIRC2,NFE2L3
MIF		cytokine			0.0302	CEBPB,IL6ST
CBX2		transcription regulator			0.0305	CCND2
FPR2		g-protein coupled receptor			0.0305	CSF1
GADD45B		other			0.0305	BIRC2
GON4L		transcription regulator			0.0305	CCND2
HOXA4		transcription regulator			0.0305	CCND2
LAMC1		other			0.0305	ETS2
MGAT3		enzyme			0.0305	ITGA3
N-(3-oxododecanoyl)-homoserine lactone		chemical reagent			0.0305	CSF1
NPFF		other			0.0305	CEBPB
glycochenodeoxycholate		chemical - endogenous mammalian			0.0305	BIRC2
noscapine		chemical drug			0.0305	BIRC2
zeranol		chemical - endogenous mammalian			0.0305	TGFB3
C5		cytokine			0.0307	CSF1,IL18R1
LIPE		enzyme			0.0307	CEBPB,SDC4
RUNX2		transcription regulator			0.0311	FLRT2,JAG1
diethylstilbestrol		chemical drug			0.0312	MFGE8,TGFB3,VNN1
Ins1		other			0.0315	CEBPB,EIF4EBP1,IL6ST
reactive oxygen species		chemical toxicant			0.0316	EIF4EBP1,ERBB3
decitabine		chemical drug		1.648	0.0324	CCND2,EZR,ITGA3,JAG1,PXDN
1'-acetoxychavicol acetate		chemical reagent			0.0326	BIRC2
ALK		kinase			0.0326	CCND2
AZD8055		chemical drug			0.0326	CCND2
FOXG1		transcription regulator			0.0326	CCND2
HOXB4		transcription regulator			0.0326	CCND2
N-carbobenzyloxy-leucine-leucine-norvalinal		chemical - protease inhibitor			0.0326	RARG
Retnla		other			0.0326	JAG1
SELENOS		other			0.0326	CEBPB
USP19		peptidase			0.0326	BIRC2
cetuximab		biologic drug			0.0326	HSPB1
leupeptin		chemical - protease inhibitor			0.0326	CD151
lonafarnib		chemical drug			0.0326	BIRC2
miR-130a-3p (and other miRNAs w/seed AGUGCAA)		mature microrna			0.0326	CSF1
SMARCA5		transcription regulator			0.0334	CCND2,ETS2
IRS1		enzyme			0.0339	CEBPB,GJB3
TSC2		other			0.0344	CCND2,HSPB1
10-nitrooleate		chemical - endogenous mammalian			0.0347	MFGE8
2-acetylaminofluorene		chemical toxicant			0.0347	JAG1
BLNK		other			0.0347	CCND2
CSF2RB		transmembrane receptor			0.0347	CCND2
FCGR1A		transmembrane receptor			0.0347	CSF1
GAS2L3		other			0.0347	CCND2
IGFBP1		other			0.0347	CEBPB
NREP		other			0.0347	ITGA3
STK3		kinase			0.0347	PDPN
STMN1		other			0.0347	TUBA1B
TNFRSF12A		transmembrane receptor			0.0347	MYBPC2
morin		chemical - endogenous non-mammalian			0.0347	BIRC2
phenytoin		chemical drug			0.0347	TGFB3
picropodophyllin		chemical drug			0.0347	CCND2
Sb202190		chemical - kinase inhibitor			0.0348	CCND2,CEBPB
docetaxel		chemical drug			0.0348	BIRC2,CCND2
EBF1		transcription regulator			0.0353	CEBPB,EIF4EBP1
APC		enzyme			0.0363	CCND2,JAG1
imatinib		chemical drug			0.0368	BIRC2,CCND2,CEBPB
CD70		cytokine			0.0369	CCND2
DAXX		transcription regulator			0.0369	HSPB1
IL13RA2		transmembrane receptor			0.0369	VNN1
LAT		other			0.0369	CSF1
NEDD4		enzyme			0.0369	ERBB3
PHB2		transcription regulator			0.0369	IL6ST
SMAD6		transcription regulator			0.0369	TGFB3
mir-205		microrna			0.0369	ERBB3
mir-451		microrna			0.0369	ETS2
IKBKG		kinase			0.0373	CEBPB,CSF1
FOS		transcription regulator			0.0385	EZR,FLRT2,PDPN,RARG
AGPAT2		enzyme			0.039	CEBPB
LYL1		transcription regulator			0.039	ADGRG1
indirubin		chemical drug			0.039	BIRC2
mannitol		chemical - endogenous mammalian			0.039	TRPV4
miR-205-5p (and other miRNAs w/seed CCUUCAU)		mature microrna			0.039	ERBB3
pimozide		chemical drug			0.039	CCND2
pomalidomide		chemical drug			0.039	CEBPB
POU5F1		transcription regulator			0.039	BIRC2,EFEMP1,TGFB3
TICAM1		other			0.0403	ETS2,JAG1
ACOX1		enzyme			0.0408	ETS2,MFGE8
TERT		enzyme			0.0408	EFEMP1,MFGE8
BIRC2	0.065	enzyme			0.0411	CSF1
CEP-1347		chemical drug			0.0411	BIRC2
CLEC4E		other			0.0411	CSF1
CREBZF		transcription regulator			0.0411	CEBPB
Gli		group			0.0411	CCND2
MNT		transcription regulator			0.0411	CCND2
MUC4		other			0.0411	ERBB3
PS-1145		chemical - kinase inhibitor			0.0411	BIRC2
RARRES2		transmembrane receptor			0.0411	CCND2
TMSB4		group			0.0411	ITGA3
diethylmaleate		chemical toxicant			0.0411	BIRC2
mir-144		microrna			0.0411	ETS2
mir-203		microrna			0.0411	JAG1
trastuzumab		biologic drug			0.0411	CEBPB
triflusal		chemical drug			0.0411	CSF1
vitamin K2		chemical drug			0.0411	CSF1
ciprofibrate		chemical drug			0.0413	CCND2,ETS2
HNRNPA2B1		other			0.0418	DDR1,ERBB3
RET		kinase			0.0423	CD151,CSF1
IL1		group			0.0426	CSF1,SDC4,TGFB3
HMGA1		transcription regulator			0.0428	CCND2,SDC4
CCND3		kinase			0.0432	CCND2
CSNK2A1		kinase			0.0432	ITGA3
PPP1R15A		other			0.0432	CEBPB
RFX3		transcription regulator			0.0432	FOXJ1
WWOX		enzyme			0.0432	ITGA3
ammonium chloride		chemical drug			0.0432	CD151
finasteride		chemical drug			0.0432	TGFB3
JAK2		kinase			0.0449	CCND2,SDC4
camptothecin		chemical drug			0.0452	BIRC2,CSF1,IL18R1,SDC4
2-mercaptoacetate		chemical drug			0.0453	MFGE8
ABT-737		chemical drug			0.0453	CEBPB
AChR		complex			0.0453	IL6ST
ADORA3		g-protein coupled receptor			0.0453	CSF1
AXIN1		other			0.0453	CCND2
DLX2		transcription regulator			0.0453	FOXJ1
GNAI3		enzyme			0.0453	CSF1
LIPG		enzyme			0.0453	CSF1
PD 169316		chemical - kinase inhibitor			0.0453	CCND2
ULK4		kinase			0.0453	FOXJ1
acetaldehyde		chemical - endogenous mammalian			0.0453	CEBPB
chrysin		chemical - endogenous non-mammalian			0.0453	IL6ST
epirubicin		chemical drug			0.0453	EZR
tamibarotene		chemical drug			0.0453	RARG
CREM		transcription regulator			0.046	CCND2,CEBPB
Nr1h		group			0.047	CCND2,CSF1
testosterone		chemical - endogenous mammalian			0.0472	ANXA3,EIF4EBP1,RARG
EIF4G2		translation regulator			0.0474	CCND2
GADD45A		other			0.0474	BIRC2
GLP-1-(7-34)-amide		biologic drug			0.0474	CEBPB
IL2RA		transmembrane receptor			0.0474	CCND2
LILRB1		transmembrane receptor			0.0474	HSPB1
MAPK12		kinase			0.0474	EFEMP1
MAPK13		kinase			0.0474	EFEMP1
MTM1		phosphatase			0.0474	EIF4EBP1
PTPN3		phosphatase			0.0474	JAG1
TRPC1		ion channel			0.0474	CCND2
branched chain amino acids		chemical drug			0.0474	BIRC2
miR-199a-3p (and other miRNAs w/seed CAGUAGU)		mature microrna			0.0474	CEBPB
salinosporamide A		chemical drug			0.0474	BIRC2
10E,12Z-octadecadienoic acid		chemical - endogenous mammalian			0.0486	IL6ST,VNN1
nitric oxide		chemical - endogenous mammalian			0.0486	BIRC2,HSPG2
CD38		enzyme			0.0492	CCND2,EIF4EBP1
9Z,11E-octadecadienoic acid		chemical - endogenous mammalian			0.0496	IL6ST
EIF4EBP2		translation regulator			0.0496	CEBPB
FGF4		growth factor			0.0496	JAG1
FSHB		other			0.0496	CCND2
MGP		other			0.0496	JAG1
Ro41-5253		chemical reagent			0.0496	RARG
alvespimycin		chemical drug			0.0496	ERBB3
evodiamine		chemical - endogenous non-mammalian			0.0496	BIRC2
lipoarabinomannan		chemical - endogenous non-mammalian			0.0496	ERBB3
pregna-4,17-diene-3,16-dione		chemical - endogenous non-mammalian			0.0496	BIRC2
zidovudine		chemical drug			0.0496	CCND2

## Sheet: M28_C0vC2
© 2000-2020 QIAGEN. All rights reserved.
Upstream Regulator	Expr Log Ratio	Molecule Type	Predicted Activation State	Activation z-score	p-value of overlap	Target molecules in dataset	Mechanistic Network
KRAS		enzyme		0.294	4.44e-06	AIMP2,CXADR,DUSP1,EMP2,F3,JUNB,LAMP1,MAP1LC3B,RING1,TINAGL1
EPM2A		phosphatase			1.31e-05	LAMP1,MAP1LC3B
NHLRC1		enzyme			1.31e-05	LAMP1,MAP1LC3B
ceruletide		biologic drug			1.98e-05	ACTG1,ATF4,TPD52
sirolimus		chemical drug		-0.92	2.03e-05	ATF4,CLIC1,F3,HSP90AA1,JUNB,MAP1LC3B,SAP18,TUBB2A
F2		peptidase	Activated	2.339	2.11e-05	CLIC1,DUSP1,F3,HSP90AA1,JUNB,LAMP1
delta-aminolevulinic acid		chemical - endogenous mammalian			9.14e-05	F3,JAK1
aplidine		biologic drug			0.000122	DUSP1,JUNB
PTGES3		enzyme			0.000156	NUPR1,TM4SF1
PD98059		chemical - kinase inhibitor		-1.736	0.000184	ATF4,DUSP1,F3,JUNB,LAMP1,RING1,TUBB2A
genistein		chemical drug		-1.633	0.000202	ATF4,DUSP1,F3,JUNB,LAMP1,TPD52
EIF2S1		translation regulator			0.000204	ATF4,MAP1LC3B,NUPR1
CA074-methyl ester		chemical reagent			0.000238	LAMP1,TPD52
PPP1R15B		phosphatase			0.000238	ATF4,NUPR1
bicuculline		chemical - endogenous non-mammalian			0.00024	DUSP1,JUNB,SAP18
NRG1		growth factor			0.000263	ATF4,DUSP1,EMP2,GPS2,JUNB
dalfampridine		chemical drug			0.000279	DUSP1,JUNB,SAP18
26s Proteasome		complex		-0.762	0.000299	ATP6V0E1,JUNB,LAMP1,MAP1LC3B
RPS6KA4		kinase			0.000337	DUSP1,JUNB
TLE1		transcription regulator			0.000337	DUSP1,NUPR1
PDX1		transcription regulator		1.951	0.000681	ACTG1,ATF4,F3,JUNB
PRKCD		kinase		1.715	0.000694	JUNB,LAMP1,MAP1LC3B,TUBB2A
DPP-23		chemical reagent			0.000732	ATF4,HSP90AA1
amphetamine		chemical drug			0.000804	ATF4,F3,JUNB
PPP1R15A		other			0.000813	ATF4,MAP1LC3B
CD 437		chemical drug		-1.934	0.000921	CLIC1,F3,HSP90AA1,SAP18
MYC		transcription regulator		1.242	0.000935	AIMP2,ATF4,DUSP1,F3,HSP90AA1,KRT17,LAMP1,TPD52,YRDC
RPS6KA5		kinase			0.000985	DUSP1,JUNB
carbon tetrachloride		chemical toxicant			0.00118	Calm1 (includes others),DUSP1,HSP90AA1,JUNB
lysophosphatidic acid		chemical - other			0.00121	DUSP1,F3,JUNB
SGPP2		phosphatase			0.00138	ATF4,HSP90AA1
PSEN1		peptidase			0.00146	ACTG1,DUSP1,HSP90AA1,NUPR1,TUBB2A
glutamine		chemical - endogenous mammalian			0.00151	ATF4,DUSP1,JUNB
phenethyl isothiocyanate		chemical drug			0.00151	ATP6V0E1,HSP90AA1,JAK1
beta-estradiol		chemical - endogenous mammalian		1.051	0.00152	Akap9,CLDN6,CXADR,DUSP1,EIF3A,F3,JAK1,JUNB,KRT17,NUPR1,TM4SF1,TPD52	ELK1,MAPK1,beta-estradiol
WT1		transcription regulator			0.00153	CLIC1,JUNB,Ptma (includes others),TM4SF1
cholesterol		chemical - endogenous mammalian			0.00155	ATF4,F3,JAK1,MAP1LC3B
EIF2AK3		kinase			0.00159	ATF4,MAP1LC3B,NUPR1
NPC2		transporter			0.00172	CREB5,MAP1LC3B
LLGL2		other			0.00184	DUSP1,EMP2
ERBB3		kinase			0.00186	DUSP1,EMP2,F3
cigarette smoke		chemical toxicant			0.00208	ATF4,HSP90AA1,JAK1,MAP1LC3B	NFE2L2,cigarette smoke
AP-1 decoy		chemical reagent			0.00212	DUSP1
AP2S1		transporter			0.00212	ATP6V0E1
BC-DXI01		chemical reagent			0.00212	AIMP2
CLK1		kinase			0.00212	F3
CLK4		kinase			0.00212	F3
HCV 796		chemical drug			0.00212	MAP1LC3B
INHBE		growth factor			0.00212	JUNB
KH-CB19		chemical - kinase inhibitor			0.00212	F3
Lectin		group			0.00212	F3
Lysosomal Protease		group			0.00212	MAP1LC3B
PFKP		kinase			0.00212	F3
TMEM184A		other			0.00212	DUSP1
Tnxa-ps1		other			0.00212	DUSP1
eIF2B		complex			0.00212	ATF4
glycan		chemical - other			0.00212	F3
holothurian glycosaminoglycan		chemical - endogenous non-mammalian			0.00212	F3
lymphokine		group			0.00212	F3
NADP		chemical - endogenous mammalian			0.00212	F3
nitroaspirin		chemical drug			0.00212	F3
CLDN7		other			0.00225	F3,TINAGL1,TPRG1L
SRC		kinase			0.00225	DUSP1,F3,LAMP1
ARRB1		other			0.00235	F3,JUNB
ESR1		ligand-dependent nuclear receptor		1.134	0.00247	CXADR,F3,HSP90AA1,JAK1,JUNB,KHDRBS1,SERPINB6,TM4SF1,TPD52
TERC		other			0.00249	NUPR1,TUBB2A
NFE2L2		transcription regulator		1.408	0.00262	ACTG1,ATF4,Calm1 (includes others),HSP90AA1,MAP1LC3B
ARRB2		other			0.00264	F3,JUNB
mercuric chloride		chemical toxicant			0.00264	HSP90AA1,JUNB
ALOX5		enzyme			0.00278	ATF4,HSP90AA1
CAMK4		kinase			0.00278	F3,JUNB
TRH		other			0.00278	DUSP1,JUNB	ELK1,MAPK1,TRH
XDH		enzyme			0.00278	DUSP1,F3
lipopolysaccharide		chemical drug		1.346	0.00279	ATF4,Calm1 (includes others),CXADR,DUSP1,F3,JUNB,LAMP1,MAP1LC3B,NUPR1,SAP18,SLC15A3
HRAS		enzyme			0.00297	ACTG1,DUSP1,HSP90AA1,JUNB,KHDRBS1,TINAGL1
IFNG		cytokine		1.422	0.00307	ATF4,CXADR,DUSP1,F3,HSP90AA1,JUNB,KRT17,NUPR1,SLC15A3	ELK1,IFNG,MAPK1
SB203580		chemical - kinase inhibitor		-1.419	0.00309	DUSP1,EMP2,F3,JUNB,SLC15A3
ERN1		kinase			0.00324	ATF4,MAP1LC3B,TINAGL1
conjugated linoleic acid		chemical drug			0.00341	DUSP1,JAK1
ERBB2		kinase		0	0.00351	AIMP2,ATF4,F3,JAK1,JUNB,LAMP1,TPD52	ERBB2,MYC
2-amino-5-phosphonovaleric acid		chemical - other			0.00351	ATF4,DUSP1,JUNB
IGF1		growth factor		1.961	0.00354	DUSP1,F3,JUNB,LAMP1,NUPR1	ELK1,IGF1,MAPK1
TFEB		transcription regulator			0.00358	ATP6V0E1,LAMP1
SP600125		chemical - kinase inhibitor		-1.98	0.00373	DUSP1,F3,JUNB,NUPR1	ELK1,MAPK1,SP600125
ERK1/2		group			0.004	DUSP1,F3,JUNB,KRT17	ELK1,ERK1/2,MAPK1
Collagen(s)		complex			0.00409	ATF4,LAMP1
acetovanillone		chemical drug			0.00409	DUSP1,F3
(S)-flurbiprofen		chemical drug			0.00423	JUNB
AGI-1095		chemical reagent			0.00423	F3
AP2B1		transporter			0.00423	ATP6V0E1
CCHCR1		other			0.00423	KRT17
ECD		transcription regulator			0.00423	ATF4
IMPACT		other			0.00423	ATF4
MSK1/2		group			0.00423	DUSP1
MYOF		other			0.00423	LAMP1
PLEKHM1		other			0.00423	MAP1LC3B
PROTEASE		group			0.00423	F3
RILP		other			0.00423	LAMP1
SNF8		enzyme			0.00423	VPS36
bivalirudin		biologic drug			0.00423	F3
buformin		chemical drug			0.00423	ATF4
canertinib		chemical drug			0.00423	F3
dilazep		chemical drug			0.00423	F3
eculizumab		biologic drug			0.00423	F3
methiothepin		chemical drug			0.00423	F3
miR-296-3p (miRNAs w/seed AGGGUUG)		mature microrna			0.00423	JUNB
miR-637 (and other miRNAs w/seed CUGGGGG)		mature microrna			0.00423	NUPR1
milrinone		chemical drug			0.00423	F3
polytef		chemical reagent			0.00423	F3
sarpogrelate		chemical drug			0.00423	F3
17-alpha-ethinylestradiol		chemical drug			0.00432	ATF4,F3,JAK1
herbimycin		chemical - kinase inhibitor			0.00465	DUSP1,JUNB	ELK1,MAPK1,herbimycin
kainic acid		chemical toxicant			0.00472	ATF4,DUSP1,JUNB
nitric oxide		chemical - endogenous mammalian			0.00472	DUSP1,HSP90AA1,JUNB
TGFB1		growth factor	Activated	2.359	0.00483	ATF4,Calm1 (includes others),CXADR,DUSP1,F3,HSP90AA1,JUNB,KRT17,NUPR1,TUBB2A	ELK1,MAPK1,TGFB1
ST1926		chemical drug			0.00488	CLIC1,HSP90AA1,SAP18
INS		other			0.00497	DUSP1,F3,JUNB
IL4		cytokine		0.816	0.00499	ACTG1,F3,HNRNPH3,JAK1,JUNB,SERPINB6,TINAGL1
TNF		cytokine		1.892	0.00537	ATF4,DUSP1,EMP2,F3,JAK1,JUNB,Sf1,SLC15A3,TINAGL1,TM4SF1
U0126		chemical - kinase inhibitor		-1.408	0.00547	ATF4,DUSP1,F3,JUNB,LAMP1	MYC,PDX1,U0126
Salmonella enterica serotype abortus equi lipopolysaccharide		chemical toxicant			0.00549	F3,TPD52,YRDC
salicylic acid		chemical drug			0.00564	EIF3A,F3
5-azacytidine		chemical drug			0.00567	DUSP1,F3,KRT17
FOXO3		transcription regulator			0.00579	JAK1,JUNB,MAP1LC3B,NUPR1
Am 580		chemical toxicant			0.00585	DUSP1,F3
Z-LLL-CHO		chemical - protease inhibitor			0.00585	ATF4,CLIC1,DUSP1,HSP90AA1
anisomycin		chemical - endogenous non-mammalian			0.00606	DUSP1,JUNB	ELK1,MAPK1,anisomycin
carbonyl cyanide m-chlorophenyl hydrazone		chemical toxicant			0.00606	ATF4,MAP1LC3B
leukotriene D4		chemical - endogenous mammalian			0.00606	DUSP1,F3
2-amino-3-phosphonopropionic acid		chemical - endogenous mammalian			0.00634	JUNB
3,7-dimethyl-1-propargylxanthine		chemical reagent			0.00634	F3
5-phenylvaleric acid		chemical reagent			0.00634	ATF4
BCS1L		other			0.00634	ATF4
CYP2C9		enzyme			0.00634	DUSP1
EIF2B1		translation regulator			0.00634	ATF4
INHBC		growth factor			0.00634	JUNB
KLHL21		other			0.00634	DUSP1
Pick1		other			0.00634	AIMP2
SMCR8		other			0.00634	LAMP1
TUBB1		other			0.00634	TUBB2A
YARS1		enzyme			0.00634	F3
defibrotide		biologic drug			0.00634	F3
isosorbide-5-mononitrate		chemical drug			0.00634	F3
mir-297		microrna			0.00634	JUNB
taprostene		chemical reagent			0.00634	DUSP1
tarenflurbil		chemical drug			0.00634	JUNB
trimethyloxamine		chemical - endogenous non-mammalian			0.00634	ATF4
OSM		cytokine	Activated	2.194	0.00661	CXADR,F3,JUNB,KRT17,TM4SF1
bucladesine		chemical toxicant			0.00673	DUSP1,F3,JUNB,TINAGL1
4-hydroxytamoxifen		chemical drug			0.00684	DUSP1,JUNB,TM4SF1
HOXA10		transcription regulator			0.00684	AIMP2,EIF3A,HSP90AA1
Calmodulin		group			0.00694	Calm1 (includes others),F3
cadmium chloride		chemical toxicant			0.00717	ATF4,HSP90AA1
FOS		transcription regulator		0.577	0.00736	ACTG1,F3,JUNB,SAP18,TPD52
CXCR4		g-protein coupled receptor			0.00741	F3,JUNB
ELK1		transcription regulator			0.00741	JUNB,NUPR1
STUB1		enzyme			0.00741	HSP90AA1,JUNB
EGR1		transcription regulator			0.00758	F3,JUNB,MAP1LC3B
carbon monoxide		chemical - endogenous mammalian			0.00764	ATF4,F3
ATF4	0.006	transcription regulator			0.00769	ATF4,MAP1LC3B,NUPR1
bexarotene		chemical drug			0.00802	DUSP1,KRT17,TM4SF1
3-deazaneplanocin		chemical drug			0.00813	KRT17,NUPR1
25-hydroxycholesterol		chemical reagent			0.00837	ATF4,JUNB
tributyrin		chemical drug			0.00837	DUSP1,KRT17
4-(4-(3-(4-trifluoromethoxy-phenyl)ureido)cyclohexyloxy)benzoic acid		chemical reagent			0.00844	MAP1LC3B
ANXA5		transporter			0.00844	F3
C8orf44-SGK3/SGK3		kinase			0.00844	ATF4
CYP4V2		enzyme			0.00844	LAMP1
FICD		enzyme			0.00844	HSP90AA1
GCLC		enzyme			0.00844	JUNB
HABP2		peptidase			0.00844	F3
Rsk		group			0.00844	ATF4
SF2523		chemical - kinase inhibitor			0.00844	MAP1LC3B
atipamezole		chemical drug			0.00844	JUNB
phenformin		chemical drug			0.00844	ATF4
calcitriol		chemical drug		0.436	0.00858	DUSP1,F3,LAMP1,NUPR1,SERPINB6
Akt		group		1.387	0.00858	AIMP2,ATF4,F3,LAMP1
lactacystin		chemical - protease inhibitor			0.0086	CLIC1,DUSP1,TUBB2A
MAPK1		kinase		0	0.00897	DUSP1,JUNB,KRT17,NUPR1	ELK1,MAPK1
caffeine		chemical drug			0.00914	F3,JUNB
deferoxamine		chemical drug			0.00932	DUSP1,F3,MAP1LC3B
clopidogrel		chemical drug			0.00966	F3,NUPR1
atorvastatin		chemical drug			0.00982	DUSP1,F3,JUNB
triamcinolone acetonide		chemical drug			0.00982	CXADR,DUSP1,JUNB
GLI3		transcription regulator			0.00993	DUSP1,JUNB
CD40LG		cytokine			0.01	DUSP1,F3,HSP90AA1,JUNB
ATM		kinase			0.0102	DUSP1,HSP90AA1
CHUK		kinase			0.0103	F3,HSP90AA1,JUNB
heparin		chemical - endogenous mammalian			0.0105	DUSP1,F3
ADRA1		group			0.0105	JUNB
DGKE		kinase			0.0105	F3
FDPS		enzyme			0.0105	LAMP1
G6PC3		phosphatase			0.0105	ATF4
GCLM		enzyme			0.0105	JUNB
GPR68		g-protein coupled receptor			0.0105	DUSP1
NCK2		kinase			0.0105	ATF4
SLC37A4		transporter			0.0105	MAP1LC3B
TIAL1		transcription regulator			0.0105	MAP1LC3B
Vla-4		complex			0.0105	F3
norethindrone acetate		chemical drug			0.0105	F3
tranexamic acid		chemical drug			0.0105	F3
TLR7		transmembrane receptor			0.0109	CLDN6,CREB5,JUNB
CD3		complex			0.011	ATF4,HSP90AA1,JAK1,JUNB,LAMP1
methylprednisolone		chemical drug		1.477	0.0111	Calm1 (includes others),DUSP1,F3,MAP1LC3B,TINAGL1
ATG7		enzyme			0.0113	ATF4,LAMP1
Pkc(s)		group			0.0114	DUSP1,F3,JUNB
CD40		transmembrane receptor			0.0116	ATF4,DUSP1,F3
ETS1		transcription regulator			0.0117	JAK1,JUNB,SERPINB6
CCL5		cytokine			0.0119	ATF4,DUSP1
PAX3-FOXO1		fusion gene/product			0.012	CLIC1,DUSP1,HSP90AA1
MAP2K1/2		group			0.0122	DUSP1,JAK1
fenretinide		chemical drug			0.0122	ATF4,JAK1
romidepsin		biologic drug			0.0122	CXADR,DUSP1
FGF2		growth factor		1.961	0.0122	ATF4,F3,JUNB,Ptma (includes others)
N-Ac-Leu-Leu-norleucinal		chemical - protease inhibitor			0.0125	ATF4,LAMP1
PD173074		chemical reagent			0.0125	F3,NUPR1
RETNLB		other			0.0125	JAK1,TINAGL1
nelfinavir		chemical drug			0.0125	ATF4,NUPR1
6,7-dinitroquinoxaline-2,3-dione		chemical reagent			0.0126	JUNB
6-cyano-7-nitroquinoxaline-2,3-dione		chemical reagent			0.0126	JUNB
AP2M1		other			0.0126	ATP6V0E1
Ap2 alpha		group			0.0126	ATP6V0E1
GJA8		transporter			0.0126	ATF4
H6PD		enzyme			0.0126	MAP1LC3B
HMG20A		transcription regulator			0.0126	CXADR
L-glutamine		chemical - endogenous mammalian			0.0126	DUSP1
LINC01234		other			0.0126	NUPR1
PRKD2		kinase			0.0126	F3
TFPI		other			0.0126	F3
UTRN		transmembrane receptor			0.0126	ACTG1
VAMP8		transporter			0.0126	TPD52
YWHAB		other			0.0126	DUSP1
histidinol		chemical - endogenous mammalian			0.0126	ATF4
mir-637		microrna			0.0126	NUPR1
obatoclax		chemical drug			0.0126	ATF4
obinutuzumab		biologic drug			0.0126	LAMP1
quisqualic acid		chemical - endogenous non-mammalian			0.0126	JUNB
taselisib		chemical drug			0.0126	LAMP1
epigallocatechin-gallate		chemical drug			0.0127	F3,JUNB,LAMP1
HNF4A		transcription regulator			0.0136	ATF4,C11orf58,CXADR,GNG5,JUNB,KHDRBS1,KRT17,RBM42,SAP18,VAMP5
VDR		transcription regulator			0.0139	F3,NUPR1,SERPINB6
mycophenolic acid		chemical drug			0.014	DUSP1,KRT17
N-acetyl-L-cysteine		chemical drug			0.0142	ATF4,DUSP1,MAP1LC3B
actinomycin D		biologic drug			0.0142	ATF4,DUSP1,F3
PIK3R1		kinase			0.0143	ATF4,F3
homocysteine		chemical - endogenous mammalian			0.0143	ATF4,F3
maslinic acid		chemical - endogenous non-mammalian			0.0143	JAK1,JUNB
AKIRIN2		other			0.0147	DUSP1
AP20187		chemical reagent			0.0147	ATF4
EIF2A		translation regulator			0.0147	ATF4
ISRIB		chemical reagent			0.0147	ATF4
KLKB1		peptidase			0.0147	F3
KMT5B		enzyme			0.0147	DUSP1
PDE3A		enzyme			0.0147	DUSP1
PIK3C3		kinase			0.0147	VPS36
SERPINC1		enzyme			0.0147	F3
catumaxomab		biologic drug			0.0147	LAMP1
nicotinic acetylcholine receptor		complex			0.0147	JUNB
rh-endostatin		chemical drug			0.0147	MAP1LC3B
temsirolimus		chemical drug			0.0147	LAMP1
APP		other			0.0149	ACTG1,ATF4,CLIC1,HSP90AA1,JUNB,TUBB2A
prednisolone		chemical drug			0.015	DUSP1,HSP90AA1,MAP1LC3B
COL18A1		other			0.0153	F3,JUNB
CEBPA		transcription regulator		0	0.0156	ATF4,JUNB,KRT17,TUBB2A
IL10		cytokine		-0.106	0.0156	DUSP1,F3,LAMP1,TINAGL1
CCL2		cytokine			0.0159	F3,LAMP1
phorbol esters		chemical - other			0.0159	DUSP1,JUNB
methylselenic acid		chemical reagent			0.0162	HNRNPH3,JAK1,JUNB
mir-122		microrna			0.0166	KHDRBS1,SERPINB6
AGI-1067		chemical drug			0.0168	F3
ATF7		transcription regulator			0.0168	DUSP1
CCL7		cytokine			0.0168	F3
DKK2		other			0.0168	LAMP1
NELFCD		other			0.0168	JUNB
Retinoic acid-RAR-RXR		complex			0.0168	DUSP1
SLC39A14		transporter			0.0168	ATF4
TTN		kinase			0.0168	Calm1 (includes others)
VIPR2		g-protein coupled receptor			0.0168	JUNB
citrinin		chemical toxicant			0.0168	JUNB
dihematoporphyrin ether		chemical drug			0.0168	DUSP1
saikosaponin A		chemical reagent			0.0168	JUNB
ATF2		transcription regulator			0.0169	DUSP1,NUPR1
LEP		growth factor		1	0.0171	F3,JUNB,KHDRBS1,MAP1LC3B
CSF1		cytokine			0.0174	DUSP1,JUNB,LAMP1
E. coli B5 lipopolysaccharide		chemical - endogenous non-mammalian			0.0178	DUSP1,F3,JUNB
ASPSCR1-TFE3		fusion gene/product			0.018	ATP6V0E1,LAMP1
NCOR1		transcription regulator			0.018	DUSP1,ZFP90
PC-SPES		chemical drug			0.018	HSP90AA1,TUBB2A
bee venom		chemical - endogenous non-mammalian			0.0183	JUNB,NUPR1
SOD1		enzyme			0.0183	ATF4,GNG5,JUNB
ETV5		transcription regulator			0.0187	EMP2,TINAGL1
TP53		transcription regulator		1.238	0.0188	ATF4,DUSP1,F3,HSP90AA1,JUNB,LAMP1,NUPR1,SERPINB6,TINAGL1
AP3B1		transporter			0.0189	LAMP1
Agtr1b		g-protein coupled receptor			0.0189	F3
Ck2		complex			0.0189	ATF4
LRRK2		kinase			0.0189	MAP1LC3B
NELFA		other			0.0189	JUNB
NELFE		other			0.0189	JUNB
SR1078		chemical reagent			0.0189	ATF4
asbestos		chemical toxicant			0.0189	JUNB
POMC		other			0.019	DUSP1,JUNB
Pdgf (complex)		complex			0.0194	F3,JUNB
TNFSF11		cytokine			0.0194	DUSP1,F3,JUNB
forskolin		chemical toxicant		1.206	0.0197	DUSP1,JUNB,LAMP1,MAP1LC3B,TM4SF1
F2R		g-protein coupled receptor			0.0201	DUSP1,F3
AGT		growth factor		0.568	0.0204	Calm1 (includes others),CREB5,DUSP1,F3
ATF3		transcription regulator			0.0208	ATF4,SLC15A3
FUS		transcription regulator			0.021	ATF4
HULC		other			0.021	LAMP1
IL9R		transmembrane receptor			0.021	JUNB
INCB054329		chemical drug			0.021	JAK1
Igkv1-117		other			0.021	JUNB
N4BP1		other			0.021	JUNB
NCK1		kinase			0.021	ATF4
PARP14		enzyme			0.021	F3
PDE4B		enzyme			0.021	DUSP1
Sik1		kinase			0.021	DUSP1
TDGF1		growth factor			0.021	JAK1
THOC5		other			0.021	C11orf58
acetic acid		chemical - endogenous mammalian			0.021	JUNB
gossypol		chemical drug			0.021	ATF4
miR-214-3p (and other miRNAs w/seed CAGCAGG)		mature microrna			0.021	ATF4
tiron		chemical reagent			0.021	DUSP1
HGF		growth factor			0.0211	AIMP2,EMP2,F3,KRT17
E2F1		transcription regulator			0.0214	Calm1 (includes others),CLIC1,DUSP1,GPS2
EGFR		kinase		1.964	0.0215	DUSP1,F3,JUNB,KRT17
YAP1		transcription regulator			0.0216	ACTG1,JAK1,NUPR1
GLI2		transcription regulator			0.0216	JUNB,KRT17
Mapk		group			0.022	F3,JUNB
CHRNA3		transmembrane receptor			0.023	JAK1
CNB-001		chemical reagent			0.023	ATF4
DRD1		g-protein coupled receptor			0.023	JUNB
DUSP4		phosphatase			0.023	DUSP1
EPHB1		kinase			0.023	JUNB
GPR37		g-protein coupled receptor			0.023	MAP1LC3B
L-serine		chemical - endogenous mammalian			0.023	ATF4
MED14		transcription regulator			0.023	DUSP1
NDP		growth factor			0.023	NUPR1
NR2E3		ligand-dependent nuclear receptor			0.023	NUPR1
PIKFYVE		kinase			0.023	MAP1LC3B
SLC7A5		transporter			0.023	ATF4
carmustine		chemical drug			0.023	HSP90AA1
orlistat		chemical drug			0.023	ATF4
pepstatin		chemical - protease inhibitor			0.023	MAP1LC3B
phospholipid		chemical - endogenous mammalian			0.023	F3
peptidoglycan		chemical - endogenous non-mammalian			0.0231	DUSP1,JUNB
STK11		kinase			0.0232	ATP6V0E1,EIF3A,JUNB
black raspberry extract		chemical drug			0.0239	ATP6V0E1,HSP90AA1
ATP		chemical - endogenous mammalian			0.0243	DUSP1,F3
EPO		cytokine			0.0245	CLIC1,JUNB,NUPR1
losartan potassium		chemical drug			0.0247	ATF4,F3
arsenite		chemical toxicant			0.0251	ATF4,DUSP1
BAG3		other			0.0251	MAP1LC3B
HSPB8		kinase			0.0251	MAP1LC3B
L-histidine		chemical - endogenous mammalian			0.0251	ATF4
TOP1		enzyme			0.0251	F3
UBA1		enzyme			0.0251	ATF4
5-hydroxytryptamine		chemical - endogenous mammalian			0.0255	Calm1 (includes others),F3
GH1		growth factor			0.0255	ATF4,JUNB
LY294002		chemical - kinase inhibitor		-1.715	0.0258	ATF4,DUSP1,F3,JUNB
MAP4K4		kinase			0.0259	ATP6V0E1,Calm1 (includes others)
oleic acid		chemical - endogenous mammalian			0.0263	ATF4,DUSP1
AKT inhibitor VIII		chemical reagent			0.0272	F3
CSF2RA		transmembrane receptor			0.0272	JUNB
Complement		complex			0.0272	F3
ELK4		transcription regulator			0.0272	JUNB
HPSE		enzyme			0.0272	F3
PHA-666859		chemical - kinase inhibitor			0.0272	CRYBB1
PPP5C		phosphatase			0.0272	DUSP1
Ppp2c		group			0.0272	DUSP1
RPL22		translation regulator			0.0272	ATF4
SDC1		enzyme			0.0272	JUNB
TIA1		other			0.0272	MAP1LC3B
mir-127		microrna			0.0272	DUSP1
trypsin		group			0.0272	F3
EGF		growth factor			0.0279	DUSP1,F3,GPS2,JUNB
5,8,11,14-eicosatetraynoic acid		chemical reagent			0.0292	DUSP1
DNAJC3		other			0.0292	ATF4
F10		peptidase			0.0292	F3
FH		enzyme			0.0292	ATF4
GABBR1		g-protein coupled receptor			0.0292	ATF4
MFN2		enzyme			0.0292	ATF4
RBP3		transporter			0.0292	ATF4
STOX1		other			0.0292	ACTG1
carfilzomib		biologic drug			0.0292	ATF4
celecoxib		chemical drug			0.0292	ATF4,F3
clasto-lactacystin beta-lactone		chemical - protease inhibitor			0.0292	ATF4
dimethyl fumarate		chemical drug			0.0292	F3
ebselen		chemical drug			0.0292	DUSP1
growth factor		group			0.0292	DUSP1
miR-148a-3p (and other miRNAs w/seed CAGUGCA)		mature microrna			0.0292	DUSP1
pentobarbital		chemical drug			0.0292	JUNB
salmeterol		chemical drug			0.0292	DUSP1
xanthine		chemical - endogenous mammalian			0.0292	DUSP1
1-naphthylisothiocyanate		chemical toxicant			0.0313	F3
48s		complex			0.0313	ATF4
ADP		chemical - endogenous mammalian			0.0313	F3
CAPN3		peptidase			0.0313	DUSP1
FNDC5		other			0.0313	ATF4
HOXB4		transcription regulator			0.0313	JUNB
L-685,458		chemical - protease inhibitor			0.0313	LAMP1
N-ethyl-N-nitrosourea		chemical toxicant			0.0313	HSP90AA1
SPTLC2		enzyme			0.0313	ATF4
prazosin		chemical drug			0.0313	DUSP1
mifepristone		chemical drug			0.0316	DUSP1,F3,JUNB
PDGF BB		complex			0.0326	DUSP1,F3,JUNB
APOE		transporter			0.0331	ATF4,F3,JAK1
Ige		complex			0.0331	CXADR,JUNB,SERPINB6
BCR (complex)		complex			0.0332	JAK1,JUNB
AQP1		transporter			0.0333	NUPR1
BHLHA15		transcription regulator			0.0333	NUPR1
CSF2RB		transmembrane receptor			0.0333	JUNB
FCGR1A		transmembrane receptor			0.0333	F3
GAS2L3		other			0.0333	TM4SF1
GC-GCR dimer		complex			0.0333	DUSP1
MIR101		group			0.0333	DUSP1
OSBPL8		transporter			0.0333	ATF4
mannose		chemical - endogenous mammalian			0.0333	ATF4
salubrinal		chemical reagent			0.0333	ATF4
SUZ12		enzyme			0.0336	EIF3A,KRT17
ADORA2A		g-protein coupled receptor			0.0341	DUSP1,TUBB2A
CASR		g-protein coupled receptor			0.0341	NUPR1,SERPINB6
VHL		transcription regulator			0.0341	ATF4,F3
n-nitrosomethylbenzylamine		chemical toxicant			0.0341	ATP6V0E1,HSP90AA1
ITGB1		transmembrane receptor			0.035	JUNB,RING1
methapyrilene		chemical drug			0.035	ACTG1,ATF4
2-arachidonoylglycerol		chemical - endogenous mammalian			0.0354	F3
MDK		growth factor			0.0354	LAMP1
MYT1		transcription regulator			0.0354	TM4SF1
pCPT-cAMP		chemical - kinase inhibitor			0.0354	JUNB
silicon dioxide		chemical drug			0.0354	JUNB
IL3		cytokine			0.0357	Calm1 (includes others),JUNB,TPD52
Mek		group			0.0359	F3,JUNB,LAMP1
HDAC2		transcription regulator			0.0368	F3,TPD52
Pka		complex			0.0368	DUSP1,JUNB
SYVN1		transporter			0.0368	DUSP1,F3
15(S)-HETE		chemical - endogenous mammalian			0.0374	F3
GCGR		g-protein coupled receptor			0.0374	DUSP1
MK2206		chemical drug			0.0374	ATF4
OPA1		enzyme			0.0374	ATF4
S1PR2		g-protein coupled receptor			0.0374	F3
TACR1		g-protein coupled receptor			0.0374	F3
acadesine		chemical drug			0.0374	F3
glycine		chemical - endogenous mammalian			0.0374	ATF4
miR-9-5p (and other miRNAs w/seed CUUUGGU)		mature microrna			0.0374	JAK1
quinpirole		chemical reagent			0.0374	JUNB
sertraline		chemical drug			0.0374	ATF4
NCOA1		transcription regulator			0.0392	Calm1 (includes others),JUNB
RET		kinase			0.0392	ATF4,HSP90AA1
ACTB		other			0.0395	ACTG1
BAP1		peptidase			0.0395	ATF4
CCK		other			0.0395	TPD52
CEP-1347		chemical drug			0.0395	ATF4
CREBZF		transcription regulator			0.0395	ATF4
IL31		other			0.0395	JUNB
NOD1		other			0.0395	DUSP1
RHOJ		enzyme			0.0395	ACTG1
TMBIM6		other			0.0395	MAP1LC3B
helenalin		chemical - endogenous non-mammalian			0.0395	ATF4
trichostatin A		chemical drug		0.009	0.0406	CXADR,DUSP1,F3,MAP1LC3B,TPD52
dexamethasone		chemical drug		0.633	0.0409	ACTG1,ATF4,Calm1 (includes others),CLIC1,CXADR,DUSP1,F3,JUNB,KRT17
curcumin		chemical drug			0.0411	CLIC1,F3,JUNB
(1S,2R)-NCL-1		chemical reagent			0.0415	ATF4
11,12-epoxyeicosatrienoic acid		chemical - endogenous mammalian			0.0415	DUSP1
HULC		other			0.0415	LAMP1
LCP2		other			0.0415	LAMP1
MPZ		other			0.0415	ATF4
NAB2		transcription regulator			0.0415	F3
NCD-38		chemical reagent			0.0415	ATF4
PTP4A3		phosphatase			0.0415	HSP90AA1
S1PR1		g-protein coupled receptor			0.0415	JUNB
dactolisib		chemical drug			0.0415	MAP1LC3B
lapatinib		chemical drug			0.0415	JUNB
mir-101		microrna			0.0415	DUSP1
puromycin		chemical - endogenous non-mammalian			0.0415	F3
JUNB	0.054	transcription regulator			0.0416	DUSP1,JUNB
CG		complex			0.0419	DUSP1,JUNB,TM4SF1
cytokine		group			0.0421	DUSP1,F3
CREM		transcription regulator			0.0426	DUSP1,JUNB
SNAI1		transcription regulator			0.0426	CXADR,KRT17
ADRB3		g-protein coupled receptor			0.0435	JUNB
COL2A1		other			0.0435	ATF4
Fibrinogen		complex			0.0435	F3
MED12		transcription regulator			0.0435	CREB5
YWHAZ		enzyme			0.0435	ATF4
chrysin		chemical - endogenous non-mammalian			0.0435	JAK1
epirubicin		chemical drug			0.0435	DUSP1
miR-31-5p (and other miRNAs w/seed GGCAAGA)		mature microrna			0.0435	KRT17
pilocarpine		chemical drug			0.0435	JUNB
tamibarotene		chemical drug			0.0435	F3
medroxyprogesterone acetate		chemical drug			0.0441	F3,JUNB
10E,12Z-octadecadienoic acid		chemical - endogenous mammalian			0.0451	ATF4,CREB5
P38 MAPK		group			0.0451	DUSP1,F3,JUNB
ACVR1C		kinase			0.0456	JUNB
CXCR3		g-protein coupled receptor			0.0456	MAP1LC3B
MTM1		phosphatase			0.0456	MAP1LC3B
NOX1		enzyme			0.0456	F3
ORMDL3		other			0.0456	MAP1LC3B
PLA2G6		enzyme			0.0456	ATF4
cycloheximide		chemical reagent			0.046	DUSP1,JUNB,Sf1
VCAN		other			0.0467	Calm1 (includes others),F3
UCP1		transporter			0.0472	ATF4,NUPR1
ALDH2		enzyme			0.0476	ATF4
Fibrin		complex			0.0476	F3
IGFBP5		other			0.0476	F3
NADPH oxidase		complex			0.0476	F3
Ro41-5253		chemical reagent			0.0476	F3
TFPI2		other			0.0476	JUNB
MAPT		other			0.0481	ACTG1,HSP90AA1,TUBB2A
SATB1		transcription regulator			0.0487	ACTG1,HSP90AA1
1-methyl-4-phenylpyridinium		chemical toxicant			0.0496	ATF4
DRAP1		transcription regulator			0.0496	PDCD7
HOXA13		transcription regulator			0.0496	EMP2
IPMK		kinase			0.0496	JUNB
NFAT (complex)		complex			0.0496	F3
VIM		other			0.0496	F3
bosentan		chemical drug			0.0496	F3
carvedilol		chemical drug			0.0496	F3
dexamethasone phosphate		chemical drug			0.0496	DUSP1
diosgenin		chemical - endogenous non-mammalian			0.0496	F3
zerumbone		chemical - endogenous non-mammalian			0.0496	ATF4

## Sheet: M3_C4vC2
© 2000-2020 QIAGEN. All rights reserved.
Upstream Regulator	Expr Log Ratio	Molecule Type	Predicted Activation State	Activation z-score	p-value of overlap	Target molecules in dataset	Mechanistic Network
NFKBIA	0.254	transcription regulator		1.18	2.69e-15	ADGRE5,ANKRD1,BCL3,BIRC3,BOK,C3,CASP4,CCL20,CDKN1A,CTNNA1,GADD45B,ICAM1,NFKB2,NFKBIA,NFKBIE,PMEPA1,RABEP1,RELB,TGFB2,VCAM1	FOXO1,FOXO3,HDAC3,IKBKB,IL6,IRF1,JUN,NFKB1,NFKB2,NFKBIA,NFkB (complex),NOTCH1,NR3C1,RELA,RELB,STAT3,STAT5A
C11orf95-RELA		fusion gene/product	Activated	3	3.87e-13	BCL3,BIRC3,CASP4,ICAM1,NFKB2,NFKBIA,RELB,TAPBP,TNIP1
camptothecin		chemical drug	Activated	3.066	1.1e-12	ANXA2,BIRC3,CASP4,CCL20,CD47,CDKN1A,CHAC1,CYTH2,GADD45B,ICAM1,NFKB2,NFKBIA,NFKBIE,PTP4A1,SERPINB9,SFN,STX11,TP53INP1,VCAM1,ZFP36L1	FOS,FOXO3,HDAC3,JUN,NFKB1,NFKB2,NFKBIA,NFkB (complex),NOTCH1,NR3C1,PRKCD,RB1,RELA,RELB,STAT5A,TP53,camptothecin
JUN		transcription regulator	Activated	2.862	2.89e-12	ANXA2,BCL3,BIRC3,C3,CASP4,CCL20,CDKN1A,CXCL16,ICAM1,LMNA,NFKB2,NFKBIA,PAK3,RELB,RHOB,S100A10,SERPINB9,VCAM1	ESR1,FOS,FOXO1,FOXO3,HDAC3,IL6,JUN,JUND,NFKB1,NFKBIA,NFkB (complex),RELA,RELB,STAT3,STAT5A,TNF
IFNG		cytokine	Activated	3.437	7.16e-12	BCL3,BIRC3,C3,CASP4,CCL20,CDKN1A,CHAC1,CLIC4,CXCL16,F11R,FKBP1A,GLIPR2,ICAM1,IFNGR1,LTB,NEURL3,NFKB2,NFKBIA,PAM,RELB,RHOB,S100A10,SERPINB9,STX11,TAPBP,TGFB2,TNFRSF12A,VCAM1	ESR1,FOS,HDAC3,IFNG,IKBKB,IL1A,IL1B,IRF1,JUN,NFKB1,NFKBIA,NFkB (complex),NR3C1,RELA,TNF
Ige		complex	Activated	3.719	1.14e-11	BCL3,C3,CDKN1A,CXCL16,FXYD6,GADD45B,ICAM1,NFKB2,NFKBIA,NFKBIE,RELB,Serpinb6b,TNFRSF12A,TTC19,VCAM1	FOXO3,HDAC3,IKBKB,IL6,IRF1,Ige,JUN,NFKB1,NFKBIA,NFkB (complex),REL,RELA,RELB,STAT5A
NFkB (complex)		complex	Activated	3.807	2.48e-10	ANKRD1,BCL3,BIRC3,C3,CASP4,CCL20,CDKN1A,GADD45B,ICAM1,LTB,NFKB2,NFKBIA,NFKBIE,NOP14,RELB,RRAS,TNIP1,VCAM1	HDAC3,IKBKB,IL1B,IRF1,JUN,NFKB1,NFKB2,NFKBIA,NFkB (complex),NOTCH1,NR3C1,REL,RELA,RELB
TNF		cytokine	Activated	4.884	6e-10	APOBEC3B,BCL3,BIRC3,C3,CASP4,CCL20,CD47,CDKN1A,CLDN4,CLIC4,CXCL16,EFHD2,F11R,GADD45B,ICAM1,IFNGR1,LTB,NFKB2,NFKBIA,NFKBIE,RELB,RHOB,S100A10,SERPINB9,TAPBP,TGFB2,TNIP1,TP53INP1,VCAM1	FOS,HDAC3,IFNG,IL1B,JUN,NFKB1,NFKBIA,NFkB (complex),NR3C1,RELA,RELB,STAT3,STAT5A,TNF
TP53		transcription regulator	Activated	3.544	1.1e-09	ADGRE5,ANKRD1,ANXA2,BCL3,BIRC3,BOK,CASP4,CD47,CDKN1A,CLIC4,F11R,FKBP1A,GADD45B,GPM6B,ICAM1,LASP1,NFKB2,NFKBIA,PAK3,PMEPA1,PTP4A1,RHOB,SERPINB9,SFN,ST14,TGFB2,TP53INP1,YWHAH,ZFP36L1	AKT1,AR,EPAS1,FOXO3,GATA3,HDAC3,JUN,NFKB1,NFKBIA,NFkB (complex),NR3C1,PI3K (complex),RB1,REL,RELA,RELB,SP1,STAT5A,TP53
IL4		cytokine		1.751	1.27e-09	ANXA2,BCL3,C3,CCL20,CDKN1A,CTNNA1,CXCL16,EFHD2,FLNA,GLIPR2,GPM6B,HTRA2,ICAM1,LTB,NFKB2,NFKBIA,S100A10,ST14,TAPBP,VARS1,VCAM1	FOS,HDAC3,IKBKB,IL4,IRF1,JUN,NFKB1,NFKBIA,NFkB (complex),NR3C1,RELA,RELB,STAT6
RELA		transcription regulator	Activated	3.401	1.52e-09	ANKRD1,BCL3,BIRC3,C3,CCL20,CDKN1A,ICAM1,LTB,NFKB2,NFKBIA,NFKBIE,RELB,TAPBP,TNIP1,VCAM1	ESR1,HDAC3,JUN,NFKB1,NFKB2,NFKBIA,NFkB (complex),NOTCH1,REL,RELA,RELB,STAT3,STAT5A,TNF
MAP3K14		kinase	Activated	2.593	2.07e-09	BIRC3,ICAM1,LTB,NFKB2,NFKBIA,NFKBIE,RELB,VCAM1	IKBKB,IRF1,JUN,MAP3K14,NFKB1,NFKBIA,NFkB (complex),NOTCH1,RELA,RELB,STAT5A,TRAF3
IKBKB		kinase		1.683	3.92e-09	ANKRD1,BIRC3,C3,CCL20,CDKN1A,CXCL16,ICAM1,LTB,NFKB2,NFKBIA,RELB,VCAM1	IKBKB,IKBKG,JUN,NFKB1,NFKB2,NFKBIA,NFkB (complex),NOTCH1,PRKCD,RELA,RELB,STAT5A
NFKB1		transcription regulator	Activated	3.109	4.4e-09	ANKRD1,BCL3,BIRC3,CASP4,CCL20,CDKN1A,ICAM1,LTB,NFKB2,NFKBIA,RELB,VCAM1	HDAC3,IKBKB,IRF1,JUN,NFKB1,NFKB2,NFKBIA,NFkB (complex),NR3C1,REL,RELA,RELB,STAT3,STAT5A
TGFB1		growth factor	Activated	2.495	9.48e-09	ANKRD1,ANXA2,BCL3,C3,CASP4,CCL20,CDKN1A,CLDN4,CLIC4,DDX21,DYNLL1,FLNA,FXYD6,GADD45B,HNRNPAB,ICAM1,LASP1,MYL12A,NFKBIA,PAK3,PDLIM4,PMEPA1,RHOB,S100A10,TGFB2,TNFRSF12A,VCAM1	AR,CEBPA,CEBPD,EGR1,FGF2,FOXO1,FOXO3,IL6,JUN,MYC,NFKB1,NFKBIA,NFkB (complex),SMAD1,SMAD2,SMAD3,SMAD4,SMAD7,SP1,TGFB1
TICAM1		other	Activated	2.961	1.15e-08	APOBEC3B,BCL3,CASP4,ICAM1,NFKB2,NFKBIA,RELB,RHOB,VCAM1	ESR1,IL1B,JUN,MYD88,NFKB1,NFKBIA,NFkB (complex),NOTCH1,RELA,RELB,STAT3,TICAM1,TLR4,TNF
IL2		cytokine	Activated	2.584	1.2e-08	BIRC3,C3,CASP4,CD47,CDKN1A,DDX21,GADD45B,ICAM1,IFNGR1,LTB,OSBPL3,PDLIM4,RHOB,SERPINB9,TNFRSF12A,TP53INP1	ESR1,GATA3,ID2,IL1B,IL2,JUN,NFKB1,NFKBIA,NFkB (complex),NR3C1,RELA,STAT1,STAT5A,STAT5B,TNF,TP53
thapsigargin		chemical toxicant		1.4	1.45e-08	BIRC3,CCL20,CDKN1A,CHAC1,CLDN4,GADD45B,ICAM1,NFKBIA,SFN,VCAM1	CEBPD,EGR1,ERK1/2,FOXO1,FOXO3,IL6,JUN,NFKB1,NFKB2,NFKBIA,NFkB (complex),PRKCD,RELA,RNA polymerase II,thapsigargin
caffeic acid phenethyl ester		chemical drug		-1.355	1.78e-08	BIRC3,CDKN1A,ICAM1,NFKB2,NFKBIA,RELB,RHOB,VCAM1	EGR1,EPAS1,HDAC3,JUN,MYC,NFKB1,NFKBIA,NFkB (complex),NR3C1,P38 MAPK,PI3K (complex),PPARG,REL,RELA,RELB,STAT5A,YAP1,ZFP36,caffeic acid phenethyl ester
ESR1		ligand-dependent nuclear receptor	Inhibited	-2.61	1.86e-08	BIRC3,C3,CCL20,CDKN1A,CLDN4,DDX21,FLNA,FXYD6,GADD45B,HTRA2,ICAM1,LTB,NFKB2,NFKBIA,NFKBIE,PPP2R1A,RABEP1,RELB,SERPINB9,TAPBP,TGFB2,TNIP1,WASF2	ESR1,HDAC3,JUN,NFKB1,NFKB2,NFKBIA,NFkB (complex),PRKCD,RB1,RELA,RELB,SMAD4,SP1,STAT5A
JUNB		transcription regulator		1.709	1.96e-08	BCL3,C3,CASP4,CCL20,CXCL16,MYL12A,NFKB2,PAK3,RELB	ESR1,FOS,HDAC3,JUN,JUNB,JUND,NFKB1,NFKBIA,NFkB (complex),NR3C1,RELA,STAT5A,TNF
F2		peptidase	Activated	3.251	2.13e-08	BCL3,BIRC3,CCL20,CDKN1A,ICAM1,NFKBIA,RELB,RHOB,TGFB2,TNFRSF12A,VCAM1	F2,FOS,HDAC3,IFNG,JUN,NFKB1,NFKB2,NFKBIA,NFkB (complex),NOTCH1,NR3C1,PRKCD,RELA,RELB,STAT3,lipopolysaccharide
TNFSF11		cytokine	Activated	3.025	2.21e-08	CDKN1A,GADD45B,ICAM1,NFKB2,NFKBIA,RELB,RHOB,RRAS,SERPINB9,TNIP1,VCAM1	CHUK,EPAS1,ESR1,FOXO3,IL1B,JUN,NFKB1,NFKBIA,NFkB (complex),NR3C1,PI3K (complex),RELA,STAT5A,TNF,TNFSF11
S-nitrosoglutathione		chemical toxicant		0.056	2.42e-08	BIRC3,CDKN1A,ICAM1,NFKBIA,S100A10,VCAM1	CEBPD,EPAS1,ERK1/2,FOS,FOXO1,GATA3,HDAC3,HMGB1,JUN,NFKB1,NFkB (complex),NQO1,NR3C1,PARP1,PI3K (complex),RELA,S-nitrosoglutathione,STAT3
CHUK		kinase	Activated	2.699	2.65e-08	C3,CASP4,CDKN1A,GADD45B,ICAM1,NFKB2,NFKBIA,RELB,TNIP1,VCAM1	CHUK,E2F1,EGR1,ESR1,FOXO1,FOXO3,HDAC3,JUN,MYC,NFKB1,NFKBIA,NFkB (complex),REL,RELA,RELB,STAT5A,TNF
HRAS		enzyme		-0.056	2.92e-08	ADGRE5,ANKRD1,ANXA2,ARF6,BIRC3,BOK,CDKN1A,FLNA,ICAM1,LASP1,MYL12A,NFKBIA,PMEPA1,RHOB,SERPINB9,TGFB2	AKT1,AR,EPAS1,FOXO3,HDAC3,HRAS,JUN,MAP2K1,NCOA3,NFKB1,NFKBIA,NFkB (complex),NOTCH1,NR3C1,PI3K (complex),RB1,REL,RELA,RELB,SP1,TP53
RELB	0.088	transcription regulator			3.6e-08	BIRC3,CCL20,CDKN1A,LTB,NFKB2,NFKBIA,RELB	HDAC3,JUN,NFKB1,NFKB2,NFKBIA,NFkB (complex),REL,RELA,RELB,STAT5A
NR3C1		ligand-dependent nuclear receptor		-0.317	4.53e-08	BIRC3,BOK,CASP4,CD47,CDKN1A,DYNLL1,GADD45B,ICAM1,LTB,NFKB2,NFKBIA,RHOB,SERPINB9,TNFRSF12A,VCAM1,YWHAH	EPAS1,ESR1,FOXO3,GATA3,ID2,JUN,NFKB1,NFKBIA,NFkB (complex),NOTCH1,NR3C1,PI3K (complex),RB1,RELA,STAT1,STAT5A,STAT5B,TNF,TP53
salmonella minnesota R595 lipopolysaccharides		chemical - endogenous non-mammalian	Activated	2.78	5.03e-08	BCL3,CASP4,CCL20,ICAM1,NFKB2,NFKBIA,RELB,VCAM1	ESR1,HDAC3,HMGB1,JUN,NFKB1,NFKBIA,NFkB (complex),REL,RELA,STAT3,STAT5A,TLR4,TNF,salmonella minnesota R595 lipopolysaccharides
Ni2+		chemical reagent	Activated	2.236	5.13e-08	BIRC3,CCL20,ICAM1,LTB,VCAM1	IGFBP3,Ni2+,RELA
LTBR		transmembrane receptor		1	6.29e-08	CCL20,GPM6B,ICAM1,NFKB2,NFKBIA,VCAM1	JUN,LTBR,MAP3K14,NFKB1,NFKBIA,NFkB (complex),NOTCH1,RELA,RELB,TNFSF14,TRAF3
cyclosporin A		biologic drug		0.573	6.3e-08	ANXA2,BIRC3,CDKN1A,CLDN4,FLNA,ICAM1,IFNGR1,NFKBIA,PAM,S100A10,TNFRSF12A,VCAM1,YWHAH	CCND1,E2F1,EGR1,ELAVL1,FOXO1,FOXO3,IGF1,NFKBIA,Nfat (family),PPARA,PRKCA,PTGS2,RB1,RELA,TP53,cyclosporin A,doxorubicin
FAS		transmembrane receptor		-1.045	7.19e-08	ANXA2,BIRC3,CCL20,CDKN1A,CYTH2,ICAM1,LTB,NFKBIA,NFKBIE,PTP4A1,SERPINB9,VCAM1	FAS,IL1B,JUN,NFKB1,NFKB2,NFKBIA,NFkB (complex),NOTCH1,PRKCD,RELA,RELB,STAT5A
methylprednisolone		chemical drug		-0.242	8.72e-08	ANXA2,CDKN1A,DYNLL1,IFNGR1,NFKB2,NFKBIA,NFKBIE,RABEP1,RELB,SERPINB9,TAPBP,TNIP1,VARS1,VCAM1,ZFP36L1
ECSIT		transcription regulator	Activated	2.183	9.64e-08	BCL3,NFKB2,NFKBIA,NFKBIE,RELB	ECSIT,JUN,NFKB1,NFKBIA,NFkB (complex),NOTCH1,RELA,RELB,STAT5A
IL33		cytokine	Activated	2.717	1.03e-07	BCL3,BIRC3,CXCL16,GADD45B,ICAM1,NFKB2,NFKBIA,NFKBIE,RELB,STX11	HDAC3,IL33,Ige,Immunoglobulin,JUN,NFKB1,NFKBIA,NFkB (complex),REL,RELA,RELB,STAT5A
IL1A		cytokine	Activated	3.056	1.19e-07	BCL3,BIRC3,C3,CCL20,CDKN1A,ICAM1,IFNGR1,NFKBIA,S100A10,VCAM1	CEBPD,ERK1/2,ESR1,FOS,FOXO1,HDAC3,IFNG,IL1A,JUN,NFKB1,NFKBIA,NFkB (complex),NR3C1,RELA,RELB,STAT3,TNF
TRAF3		enzyme	Inhibited	-2.433	1.26e-07	BIRC3,CCL20,ICAM1,NFKB2,NFKBIA,NFKBIE,RELB	IKBKG,JUN,MAP3K14,NFKB1,NFKB2,NFKBIA,NFkB (complex),PRKCD,RELA,RELB,STAT5A,TRAF3
PRKCD		kinase	Activated	2.944	1.27e-07	BIRC3,CCL20,CDKN1A,CXCL16,ICAM1,NFKB2,NFKBIA,RELB,VCAM1	FOS,HDAC3,IKBKB,IL1B,IRF1,JUN,NFKB1,NFKBIA,NFkB (complex),NOTCH1,NR3C1,PRKCD,RELA,RELB
CD40LG		cytokine		1.871	1.41e-07	BIRC3,CCL20,CDKN1A,ICAM1,LTB,NFKB2,NFKBIA,NFKBIE,RELB,TNIP1,VCAM1,ZFP36L1	CD40LG,IKBKB,IRF1,JUN,MAP3K14,NFKB1,NFKB2,NFKBIA,NFkB (complex),PRKCD,RELA,RELB,STAT5A
PDGF BB		complex	Activated	2.602	1.7e-07	BCL3,C3,CASP4,CCL20,CDKN1A,FLNA,LMNA,RHOB,TNFRSF12A,VCAM1,ZFP36L1	CEBPD,EGR1,ERK1/2,FGF2,FOXO1,FOXO3,IL6,JUN,MYC,NFKB1,NFKBIA,NFkB (complex),P38 MAPK,PDGF BB,PPARG,RELA,SMAD3,SMAD4,SP1,TGFB1,YAP1,ZFP36
deferoxamine		chemical drug		1.103	2.41e-07	ANXA2,CCL20,CD47,CDKN1A,GADD45B,ICAM1,NFKB2,TGFB2,VCAM1	CEBPD,EGLN1,EPAS1,ERK1/2,FOXO1,HDAC3,JUN,MYC,NFKB1,NFKBIA,NFkB (complex),NOTCH1,REL,RELA,RELB,RNA polymerase II,WWTR1,YAP1,deferoxamine
MYD88		other	Activated	2.527	2.69e-07	APOBEC3B,BCL3,C3,CASP4,CLIC4,ICAM1,NFKB2,NFKBIA,RELB,VCAM1	CHUK,ESR1,FOXO3,IL1B,JUN,MYD88,NFKB1,NFKBIA,NFkB (complex),NOTCH1,RELA,RELB,TLR4,TNF
CD24		other			4.11e-07	APOBEC3B,CDKN1A,CHAC1,ICAM1,PTP4A1,RELB,TP53INP1
tunicamycin		chemical - endogenous non-mammalian		0.516	4.21e-07	BIRC3,CASP4,CCL20,CDKN1A,CHAC1,GADD45B,ICAM1,NFKBIA,VCAM1	CEBPD,ERK1/2,FOXO1,GATA3,HMGB1,IL1B,JUN,NFKB1,NFKBIA,NFkB (complex),NOTCH1,PARP1,RELA,RELB,STAT3,STAT5A,tunicamycin
cytarabine		chemical drug	Activated	2.414	4.22e-07	ADGRE5,CDKN1A,ICAM1,LTB,TGFB2,TP53INP1	BCL2,NFKBIA,RB1,SP1,TP53,cytarabine
resiquimod		chemical drug			4.26e-07	APOBEC3B,C3,CASP4,CCL20,ICAM1,LMNA,NFKB2,NFKBIA,RELB,TNIP1	CHUK,FOS,FOXO3,HDAC3,JUN,MYD88,NFKB1,NFKBIA,NFkB (complex),NR3C1,RELA,RELB,STAT3,STAT5A,resiquimod
COL1A1		other			5.49e-07	CDKN1A,CLIC4,ICAM1,VCAM1
cycloheximide		chemical reagent		-0.228	6.7e-07	BIRC3,CCL20,CDKN1A,GADD45B,ICAM1,NFKBIA,NFKBIE,RELB,RHOB,TNIP1,VCAM1	ESR1,HDAC3,HMGB1,IL1B,JUN,NFKB1,NFKBIA,NFkB (complex),REL,RELA,STAT3,STAT5A,TNF,cycloheximide
IL1B		cytokine	Activated	3.848	7.59e-07	BCL3,BIRC3,C3,CASP4,CCL20,CDKN1A,GADD45B,ICAM1,IFNGR1,NFKB2,NFKBIA,PTP4A1,RELB,RHOB,S100A10,SERPINB9,VCAM1	ESR1,FOS,HDAC3,IFNG,IL1A,IL1B,JUN,NFKB1,NFKBIA,NFkB (complex),NOTCH1,NR3C1,RELA,RELB,STAT3,TNF
SB203580		chemical - kinase inhibitor	Inhibited	-2.757	7.99e-07	APOBEC3B,C3,CCL20,CD47,CDKN1A,ICAM1,NFKB2,S100A10,Serpinb6b,SERPINB9,TGFB2,VCAM1	ESR1,FOS,HDAC3,IL1B,JUN,JUND,NFKB1,NFKBIA,NFkB (complex),NR3C1,RELA,SB203580,STAT1,STAT3,TNF
OSM		cytokine	Activated	3.075	8.27e-07	ANXA2,ARF6,BCL3,CASP4,CCL20,CDKN1A,CLDN4,ICAM1,IFNGR1,PTP4A1,STX11,TAPBP,VCAM1	CEBPD,ERK1/2,FOS,FOXO1,FOXO3,IL6,IL6R,IRF1,JUN,NFKB1,NFKBIA,NFkB (complex),NOTCH1,OSM,RELA,RELB,STAT1,STAT3
MYC		transcription regulator		0.659	8.79e-07	CD47,CDKN1A,CLIC4,CTNNA1,CYTH2,DDX21,FLNA,GADD45B,HNRNPAB,ICAM1,NFKBIA,PAM,RHOB,S100A10,TGFB2,TNFRSF12A,VARS1,VCAM1,ZFP36L1	EGR1,F2,FOXO1,GATA3,JUN,MYC,NFKB1,NFKBIA,NFkB (complex),P38 MAPK,PPARG,RELA,SMAD1,SMAD3,Tgf beta,VEGFA,VHL,YAP1,ZFP36
N-acetyl-L-cysteine		chemical drug	Inhibited	-2.934	9.06e-07	BIRC3,C3,CASP4,CCL20,CDKN1A,ICAM1,NFKBIA,RHOB,VCAM1	CEBPD,ERK1/2,FOS,FOXO1,FOXO3,HDAC3,IL1B,IL6,JUN,N-acetyl-L-cysteine,NFKB1,NFKB2,NFKBIA,NFkB (complex),NR3C1,RELA,TNFRSF1A
beta-estradiol		chemical - endogenous mammalian		0.824	9.16e-07	AARS1,BIRC3,C3,CASP4,CCL20,CDKN1A,CLDN4,CLIC4,DYNLL1,FLNA,GADD45B,ICAM1,LMNA,LTB,MYL12A,NFKB2,NFKBIA,OSBPL3,PAM,PTP4A1,SFN,SHISA4,TGFB2,TP53INP1,VCAM1,YWHAH	E2F1,EGR1,FOXO1,FOXO3,GATA3,JUN,MYC,NFKB1,NFKBIA,NFkB (complex),NOTCH1,NR3C1,PPARG,RELA,RELB,RNA polymerase II,SIRT1,STAT3,STAT5A,TP53,beta-estradiol,prostaglandin E2
phenacetin		chemical drug	Activated	2.219	9.66e-07	ANXA2,BIRC3,CLDN4,S100A10,TNFRSF12A	PPARA,PTGS2,phenacetin
rottlerin		chemical toxicant	Inhibited	-2.352	1.05e-06	APOBEC3B,BIRC3,CDKN1A,CLDN4,ICAM1,VCAM1	CEBPD,ERK1/2,ESR1,FOXO1,GATA3,HMGB1,IKK (complex),JUN,NFKB1,NFKB2,NFKBIB,NFKBIE,NFkB (complex),PARP1,PRKCD,RELA,STAT3,TNF,rottlerin
FOS		transcription regulator	Activated	2.082	1.11e-06	ATXN2,C3,CASP4,CCL20,CXCL16,ICAM1,NFKB2,PMEPA1,PTP4A1,S100A10,SERPINB9,STX11,VCAM1	ESR2,FOS,HDAC3,JUN,JUNB,JUND,NFkB (complex),NR3C1,RELA
FGF1		growth factor		-1.535	1.17e-06	CDKN1A,ICAM1,LTB,PMEPA1,TGFB2,TNFRSF12A,VCAM1	CEBPD,EGR1,ERK1/2,FGF1,FGF2,FOXO1,FOXO3,IL6,JUN,MYC,NFKB1,NFKBIA,NFkB (complex),P38 MAPK,PPARG,RELA,SP1,YAP1,ZFP36
dexamethasone		chemical drug		0.065	1.35e-06	ANKRD1,BCL3,BIRC3,C3,CCL20,CD47,CDKN1A,CLIC4,DDAH2,ETF1,GADD45B,HNRNPAB,ICAM1,IFNGR1,LTB,NFKB2,NFKBIA,NFKBIE,PAM,RELB,S100A10,SERPINB9,TGFB2,VARS1,VCAM1,ZFP36L1	ESR1,IL1A,JUN,NFKB1,NFKBIA,NFkB (complex),NOTCH1,RELA,RELB,STAT5A,TNF,dexamethasone
HGF		growth factor		0.31	1.49e-06	BIRC3,CDKN1A,DDX21,DYNLL1,FLNA,ICAM1,INPPL1,RHOB,ST14,TGFB2,VCAM1,YWHAH	EGR1,EPAS1,FOXO1,HGF,JUN,MYC,NFKB1,NFKBIA,NFkB (complex),NR3C1,Nfat (family),P38 MAPK,PI3K (complex),PPARA,PPARG,PRKCA,RB1,RELA,RHOA,Rock,SMAD1,YAP1,ZFP36
EGFL7		other			1.5e-06	ICAM1,NFKBIA,VCAM1
vancomycin		biologic drug	Activated	2.425	2.13e-06	ANXA2,BIRC3,C3,CLDN4,S100A10,TNFRSF12A
STAT6		transcription regulator		0.768	2.14e-06	BCL3,CCL20,CDKN1A,EFHD2,GADD45B,Gm12854/S100a11,GPM6B,LTB,NFKBIA,S100A10,VCAM1	ESR1,FOXO3,IL10,IL4,IL6,IRF1,JUN,NFKB1,NFKB2,NFKBIA,NFkB (complex),RELA,SP1,STAT3,STAT5A,STAT6,TNF
ID3		transcription regulator		1.941	2.25e-06	BCL3,CDKN1A,GADD45B,ICAM1,IFNGR1,LTB,RELB,VCAM1	ADIPOQ,FOXO3,ID3,IFI16,IL6,JUN,NFKB1,NFKBIA,NFkB (complex),RELA,RNA polymerase II,SP1,STAT3
NLRX1		other		-1.342	2.34e-06	BIRC3,NFKB2,NFKBIA,NFKBIE,RELB	HDAC3,IKBKB,IL1B,IRF1,JUN,NFKB1,NFKBIA,NFkB (complex),NLRX1,REL,RELA,RELB,STAT5A
PLK1		kinase			2.59e-06	ANKRD1,BOK,CDKN1A,SFN,TGFB2	FOXO3,HDAC3,NFKB1,NFKBIA,NFkB (complex),NOTCH1,NR3C1,PLK1,RB1,REL,RELA,TP53,TP63,YY1
TNFAIP3		enzyme		-0.447	2.59e-06	BIRC3,CCL20,ICAM1,NFKBIA,VCAM1	CEBPD,CXCL8,ERK1/2,FOXO1,IKBKB,IKK (complex),IRF1,JUN,NFKB1,NFKBIA,NFKBIB,NFKBIE,NFkB (complex),RELA,RELB,TNFAIP3
tetradecanoylphorbol acetate		chemical drug	Activated	3.901	2.83e-06	APOBEC3B,BCL3,BIRC3,C3,CCL20,CDKN1A,GADD45B,ICAM1,IFNGR1,LTB,NFKB2,NFKBIA,NFKBIE,RELB,S100A10,SERPINB9,TNFRSF12A,VCAM1	CSF2,ESR1,IL1B,JUN,NFKB1,NFKBIA,NFkB (complex),RELA,RELB,STAT3,STAT5A,TNF,tetradecanoylphorbol acetate
fulvestrant		chemical drug		1.098	2.87e-06	C3,CASP4,CDKN1A,DYNLL1,FKBP1A,ICAM1,SERPINB9,TGFB2,VCAM1	CEBPD,ERK1/2,FOXO1,GATA3,HMGB1,HMOX1,JUN,NFKB1,NFKBIA,NFkB (complex),Nfat (family),PARP1,PPARA,PRKCA,RB1,RELA,SP1,STAT3,estrogen receptor,fulvestrant
lipopolysaccharide		chemical drug	Activated	3.979	3.08e-06	APOBEC3B,BCL3,BIRC3,C3,CASP4,CCL20,CDKN1A,CLIC4,CXCL16,GADD45B,ICAM1,LASP1,NFKB2,NFKBIA,NFKBIE,PMEPA1,RELB,RHOB,SERPINB9,STX11,TAPBP,TGFB2,TNIP1,VCAM1	ESR1,FOS,HDAC3,IFNG,IL1B,JUN,NFKB1,NFKBIA,NFkB (complex),REL,RELA,RELB,STAT3,TNF,lipopolysaccharide
doxorubicin		chemical drug	Activated	2.965	3.11e-06	ANXA2,BIRC3,CD47,CDKN1A,CLDN4,NFKBIA,PMEPA1,S100A10,SFN,TNFRSF12A,TP53INP1	ERBB2,FOXO3,JUN,NFKB1,NFKBIA,NOTCH1,NR3C1,RB1,RELA,STAT3,TP53,doxorubicin
BIRC3	0.066	enzyme			3.71e-06	BIRC3,ICAM1,NFKB2,NFKBIA	BIRC3,IKBKB,IKBKG,IL1B,IRF1,JUN,NFKB1,NFKBIA,NFkB (complex),RELA,RELB,TRAF3
ID2		transcription regulator		1.831	3.86e-06	BCL3,CDKN1A,GADD45B,ICAM1,IFNGR1,LTB,RELB,VCAM1	EPAS1,ID2,IFI16,MYC,NFKBIA,NFkB (complex),RELA,RNA polymerase II,SP1,YAP1
theaflavin		chemical - endogenous non-mammalian			4.18e-06	CDKN1A,ICAM1,VCAM1	EPAS1,FOXO1,FOXO3,JUN,NFKB1,NFKBIA,NFkB (complex),NR3C1,PI3K (complex),RELA,RELB,STAT5A,palmitic acid,theaflavin
carbon tetrachloride		chemical toxicant		1.257	4.58e-06	CDKN1A,FKBP1A,GADD45B,ICAM1,PTP4A1,TGFB2,TNFRSF12A,VCAM1	E2F1,EGR1,F2,FOXO1,FOXO3,GATA3,HMGB1,IGF1,IL6,JUN,MYC,NFKB1,NFKBIA,NFkB (complex),PARP1,RELA,SMAD1,SMAD3,STAT3,TP53,Tgf beta,carbon tetrachloride
17-alpha-ethinylestradiol		chemical drug		0.97	4.65e-06	AARS1,ADGRE5,BCL3,C3,CDKN1A,SFN,VCAM1	17-alpha-ethinylestradiol,FOXO3,IL6,JUN,NFKB1,NFKBIA,NFkB (complex)
Pam3-Cys-Ser-Lys4		chemical reagent	Activated	2.164	5.06e-06	ADGRE5,CASP4,ICAM1,LTB,NFKBIA,RELB,TGFB2	FOS,HDAC3,IFNG,JUN,MYD88,NFKB1,NFKBIA,NFkB (complex),NOTCH1,Pam3-Cys-Ser-Lys4,REL,RELA,RELB,STAT3,STAT5A
poly rI:rC-RNA		biologic drug	Activated	3.197	5.4e-06	BIRC3,C3,CCL20,CD47,GADD45B,ICAM1,IFNGR1,LTB,NFKB2,NFKBIA,NOP14,RELB,VCAM1	ESR1,IKBKB,IL1B,IRF1,JUN,NFKB1,NFKBIA,NFkB (complex),RELA,RELB,STAT5A,TNF,poly rI:rC-RNA
SP600125		chemical - kinase inhibitor	Inhibited	-2.25	5.8e-06	APOBEC3B,CCL20,CDKN1A,CHAC1,CLDN4,CXCL16,ICAM1,Serpinb6b,VCAM1	CEBPD,EGR1,ERK1/2,FOXO1,HMGB1,IKBKB,IL10,IRF1,JUN,NFKB1,NFKB2,NFKBIA,NFkB (complex),PPARG,RELA,RNA polymerase II,SIRT1,SP600125,STAT3
ATF3		transcription regulator		-1.264	5.97e-06	BIRC3,CDKN1A,CHAC1,CXCL16,ICAM1,NFKB2	ATF3,FOS,IFNG,Immunoglobulin,JUN,NFKB1,NFKBIA,NFkB (complex),RELA,RELB,SMARCA4,STAT1,STAT3,TP53
PSMB9		peptidase			6.25e-06	NFKB2,NFKBIA,RELB	JUN,NFKB1,NFKB2,NFKBIA,NFkB (complex),NOTCH1,PSMB9,REL,RELA,RELB
VCAN		other		-1.992	6.48e-06	C3,CCL20,CDKN1A,ICAM1,NFKBIA,PAM,VCAM1	CEBPD,ERK1/2,FOXO1,JUN,NFKB1,NFKBIA,NFkB (complex),PF4,PPARG,RB1,RELA,RELB,RHOA,SMAD1,SMAD4,SMAD7,VCAN,YAP1,hyaluronic acid
TWIST1		transcription regulator		-0.396	7.59e-06	C3,CDKN1A,CLDN4,LMNA,PAM,RELB,TGFB2	NFKB1,NFkB (complex),NOTCH1,RELA,TP53,TWIST1,YY1
GPS2		transcription regulator		-1.109	8.04e-06	CCL20,CDKN1A,NFKBIA,RHOB,VCAM1	AR,Akt,CEBPA,EGR1,FOXO1,GPS2,JUN,MYC,NFKB1,NFkB (complex),NfkB1-RelA,P38 MAPK,PPARA,PPARG,RELA,RNA polymerase II,SIRT1,STAT3,TLR7,YAP1,ZFP36
gentamicin C		chemical drug	Activated	2.236	8.04e-06	ANXA2,BIRC3,CLDN4,S100A10,TNFRSF12A
REL		transcription regulator		1.718	8.42e-06	BCL3,CDKN1A,GADD45B,ICAM1,NFKB2,NFKBIA,PPP1R14B,RELB	JUN,NFKB1,NFKBIA,NFkB (complex),NOTCH1,REL,RELA,RELB,STAT5A
lomustine		chemical drug	Activated	2.236	8.68e-06	ANXA2,BIRC3,CLDN4,S100A10,TNFRSF12A
tributyrin		chemical drug	Activated	2.219	8.68e-06	BIRC3,CCL20,CDKN1A,MYL12A,NFKB2
AGT		growth factor	Activated	2.454	8.72e-06	BOK,C3,CDKN1A,DDAH2,ICAM1,NFKB2,NFKBIA,RRAS,TGFB2,TNFRSF12A,VCAM1	AGT,EPAS1,FOXO3,HDAC3,IL6,JUN,NFKB1,NFKBIA,NFkB (complex),NR3C1,Nfat (family),PI3K (complex),PPARA,PRKCA,RB1,REL,RELA,TLR4
prostaglandin E2		chemical - endogenous mammalian		1.458	9.24e-06	ANXA2,BIRC3,CASP4,CCL20,CDKN1A,DYNLL1,ICAM1,LMNA,NFKBIA	FOS,HDAC3,JUN,NFKB1,NFKB2,NFKBIA,NFkB (complex),NOTCH1,NR3C1,PPARA,PRKCD,PTGS2,RELA,RELB,STAT1,STAT3,STAT5A,TGFA,prostaglandin E2
triamterene		chemical drug	Activated	2.236	9.36e-06	ANXA2,BIRC3,CLDN4,S100A10,TNFRSF12A
TAB1		enzyme		-1	1.03e-05	BIRC3,CCL20,CDKN1A,NFKBIA	FOS,HDAC3,IKBKB,IRF1,JUN,NFKB1,NFKBIA,NFkB (complex),NOTCH1,NR3C1,RELA,RELB,STAT5A,TAB1
TNFSF14		cytokine		1.958	1.03e-05	BIRC3,CCL20,ICAM1,VCAM1	CEBPD,EPAS1,ERK1/2,FOXO1,HDAC3,IL10,JUN,NFKB1,NFKB2,NFKBIA,NFkB (complex),NR3C1,PI3K (complex),REL,RELA,STAT3,STAT5A,TNFSF14
fenamic acid		chemical reagent	Activated	2.236	1.17e-05	ANXA2,BIRC3,CLDN4,S100A10,TNFRSF12A
TRAF6		enzyme	Activated	2.216	1.25e-05	BIRC3,CCL20,CXCL16,ICAM1,RELB	FOS,HDAC3,IKBKB,IKBKG,IRF1,Immunoglobulin,JUN,NFKB1,NFKBIA,NFkB (complex),NOTCH1,NR3C1,RELA,RELB,TRAF6
KLF2		transcription regulator		0.155	1.33e-05	BCL3,CDKN1A,NFKBIA,Serpinb6b,SERPINB9,TGFB2,VCAM1	FOS,HDAC3,JUN,KLF2,NFkB (complex),NR3C1,RELA
Alpha catenin		group	Inhibited	-2.433	1.35e-05	BCL3,BIRC3,NFKBIA,RELB,TNFRSF12A,VCAM1	Alpha catenin,JUN,NFKB1,NFKBIA,NFkB (complex),RELA,RELB,STAT5A
4-hydroxytamoxifen		chemical drug		1.812	1.38e-05	C3,CDKN1A,CLDN4,DDX21,DYNLL1,NFKBIA,SERPINB9	4-hydroxytamoxifen,ESR1,ESR2,HDAC3,JUN,NFkB (complex),NR5A2,RELA,SP1,estrogen receptor
DEPTOR		other			1.62e-05	CCL20,ICAM1,VCAM1	CEBPD,DEPTOR,ERK1/2,FOXO1,JUN,NFkB (complex),RELA
E. coli B5 lipopolysaccharide		chemical - endogenous non-mammalian	Activated	2.778	1.64e-05	BCL3,BIRC3,CCL20,CDKN1A,ICAM1,NFKBIA,RHOB,TGFB2	E. coli B5 lipopolysaccharide,ESR1,FOS,HDAC3,IFNG,IL1B,JUN,NFKB1,NFKBIA,NFkB (complex),NOTCH1,REL,RELA,RELB,STAT3,TNF
CSF2		cytokine	Activated	2.66	1.74e-05	ADGRE5,BCL3,BIRC3,C3,CDKN1A,ICAM1,LTB,NFKB2,NFKBIA,RELB,SERPINB9	CSF2,HDAC3,IL1B,JUN,NFKB1,NFKB2,NFKBIA,NFkB (complex),REL,RELA,RELB,STAT5A
GPR4		g-protein coupled receptor			1.81e-05	ICAM1,VCAM1	FOXO1,GPR4,NFKB1,PPARG,RHOA,SMAD1,YAP1
Rps15a-ps4		other			1.81e-05	NFKB2,NFKBIA
ATF4		transcription regulator	Activated	2.194	1.82e-05	AARS1,ANKRD1,CDKN1A,CHAC1,TGFB2,TNFRSF12A,TNIP1
PF4		cytokine		1.314	1.87e-05	BIRC3,CDKN1A,ICAM1,NFKB2,NFKBIA	CEBPD,EPAS1,ERK1/2,ESR1,FOXO1,FOXO3,JUN,LYN,NFKB1,NFkB (complex),NR3C1,PF4,PI3K (complex),RB1,RELA,SP1,STAT3,TNF,TP53
LDL		complex	Activated	2.189	1.99e-05	APOBEC3B,C3,CCL20,CDKN1A,ICAM1,LASP1,RABEP1,VCAM1	CEBPD,ERK1/2,FOS,FOXO1,IL17A,IL1A,JUN,LDL,NFKB1,NFKBIA,NFkB (complex),RELA,STAT1,STAT3,TLR4
spermine nitric oxide complex		chemical toxicant			2.1e-05	ICAM1,S100A10,VCAM1	GATA3,HMGB1,NFKB1,NFkB (complex),PARP1,STAT3,spermine nitric oxide complex
IFI16		transcription regulator		1.096	2.12e-05	CCL20,CDKN1A,ICAM1,NFKBIA,VCAM1	ESR1,FOXO3,HDAC3,IFI16,IL6,JUN,NFKB1,NFKBIA,NFkB (complex),RB1,REL,RELA,RELB,SMAD4,SP1,STAT5A
IRAK4		kinase			2.12e-05	BIRC3,CCL20,CXCL16,IFNGR1,NFKBIA	ESR1,FOS,IFNG,IKBKB,IL1B,IRAK4,IRF1,JUN,NFKB1,NFKBIA,NFkB (complex),RELA,STAT3,TNF,TRAF6
PAX3		transcription regulator			2.22e-05	CDKN1A,FKBP1A,NFKB2,PTP4A1,RHOB,SFN,TGFB2	FOXO3,NFKBIA,NOTCH1,NR3C1,PAX3,RB1,TP53
MEOX2		transcription regulator		-0.898	2.3e-05	CCL20,CDKN1A,ICAM1,VCAM1	JUN,MEOX2,NFKB1,NFKBIA,NFkB (complex),RELA,STAT5A
SMAD3		transcription regulator		1.188	2.33e-05	ANKRD1,C3,CCL20,CDKN1A,GADD45B,PMEPA1,RHOB,TGFB2	AKT1,AR,CEBPA,CEBPD,FOXO3,JUN,MYC,NCOA3,NFKB1,NFKBIA,PPARG,RELB,SMAD3,SMAD4,TGFB1,TP53
NFKB2	0.065	transcription regulator			2.4e-05	BIRC3,CCL20,CDKN1A,NFKB2,VCAM1	JUN,NFKB1,NFKB2,NFKBIA,NFkB (complex),NOTCH1,PPARG,REL,RELA,RELB,STAT5A,TNFRSF1A
Interferon alpha		group	Activated	2.937	2.57e-05	APOBEC3B,BCL3,C3,CDKN1A,ICAM1,NFKBIA,SAMD9L,SERPINB9,TAPBP,VCAM1	CEBPD,E2F1,ERK1/2,FOS,FOXO1,IFI16,Interferon alpha,JUN,NFKB1,NFKBIA,NFkB (complex),RELA,RELB,RNA polymerase II,SIRT1,SP1,STAT1,STAT3
FLT1		kinase		-0.447	2.71e-05	CDKN1A,CLIC4,FLNA,ICAM1,TNIP1	EGR1,FLT1,FOXO1,MYC,P38 MAPK,PPARG,VEGFA,VHL,YAP1,ZFP36
TGFA		growth factor		1.982	2.71e-05	BIRC3,CCL20,CDKN1A,ICAM1,S100A10	CEBPD,ERK1/2,FOS,FOXO1,HDAC3,ID2,JUN,NFKB1,NFkB (complex),NR3C1,RELA,STAT1,STAT3,STAT5A,STAT5B,TGFA,prostaglandin E2
VHL		transcription regulator		-0.729	2.73e-05	CDKN1A,CLDN4,LMNA,MYL12B,VCAM1,ZFP36L1	EGR1,FOXO1,MYC,VEGFA,VHL
YAP1		transcription regulator		1.834	2.79e-05	ANKRD1,CDKN1A,FLNA,ICAM1,LMNA,SFN,TGFB2,VCAM1	EZH2,GATA3,MRTFA,MRTFB,NFKB1,RB1,SMAD3,SMAD4,SMAD7,WWTR1,YAP1
STAT1		transcription regulator	Activated	2.934	2.8e-05	APOBEC3B,C3,CASP4,CCL20,CDKN1A,ICAM1,NEURL3,S100A10,SAMD9L	CEBPD,ERK1/2,FOS,FOXO1,FOXO3,HDAC3,IL1B,IL6,JUN,NFKB1,NFKBIA,NFkB (complex),NR3C1,REL,RELA,STAT1,STAT3
RNASEH2A		enzyme			2.82e-05	DDX21,IFNGR1,NFKB2,NFKBIA
IKBKG		kinase		1.814	2.85e-05	BIRC3,C3,ICAM1,NFKB2,NFKBIA,RELB	FOS,HDAC3,IKBKB,IKBKG,IRF1,JUN,MAP3K14,NFKB1,NFKBIA,NFkB (complex),NR3C1,RELA,RELB,STAT5A
mir-21		microrna		-1.715	3.16e-05	ARF6,CASP4,CDKN1A,DDAH2,ICAM1,LTB,RHOB,VCAM1	CASP3,FOXO3,IL6,JUN,MYC,NFKB1,NFKBIA,NFkB (complex),RB1,RELA,Rock,STAT1,STAT3,STAT5A,YAP1,mir-21
5-O-mycolyl-beta-araf-(1->2)-5-O-mycolyl-alpha-araf-(1->1')-glycerol		chemical - endogenous non-mammalian	Activated	2.186	3.22e-05	BCL3,CCL20,ICAM1,NFKB2,VCAM1	5-O-mycolyl-beta-araf-(1->2)-5-O-mycolyl-alpha-araf-(1->1')-glycerol,CXCL8,ESR1,IL1B,JUN,NFKB1,NFKBIA,NFkB (complex),RELA,STAT5A,TNF
HMGB1		transcription regulator	Activated	2.163	3.22e-05	CCL20,CDKN1A,ICAM1,RELB,VCAM1	CEBPD,ERK1/2,F2,FOXO1,HMGB1,IKBKB,IL1,IRF1,JUN,NFKB1,NFKBIA,NFkB (complex),NOTCH1,RELA,RELB
mycophenolic acid		chemical drug	Activated	2.236	3.22e-05	BIRC3,CCL20,CDKN1A,MYL12A,NFKB2	FOS,HDAC3,JUN,NFKB1,NFKBIA,NFkB (complex),NR3C1,RELA,RELB,mycophenolic acid
TCR		complex		1.114	3.25e-05	BCL3,BIRC3,FLNA,GADD45B,IFNGR1,NFKB2,NFKBIA,RELB,TNFRSF12A	CSF2,IKBKG,IL1B,JUN,NFKB1,NFKBIA,NFkB (complex),REL,RELA,RELB,STAT3,TCR,TRAF3
ADRB		group		0	3.35e-05	ANKRD1,BOK,CASP4,CDKN1A,ICAM1,NFKBIA	ADRB,FOXO3,JUN,NCOA3,NFKB1,NFKBIA,NFkB (complex),RB1,RELA,STAT5A,testosterone
cisplatin		chemical drug	Activated	2.986	3.43e-05	ANKRD1,ANXA2,BIRC3,CDKN1A,CLDN4,F11R,ICAM1,LMNA,NFKBIA,S100A10,TNFRSF12A,TP53INP1,VCAM1	AR,Akt,CCND1,ELAVL1,FOS,FOXO1,HDAC3,JUN,MAP2K1,NCOA3,NFKB1,NFkB (complex),NR3C1,RELA,SP1,STAT3,YAP1,cisplatin,prostaglandin E2
IL5		cytokine	Activated	2.63	3.49e-05	ANXA2,BCL3,CASP4,CDKN1A,DDX21,GLIPR2,ICAM1,LTB	CASP3,FOS,FOXO3,ID2,IL10,IL5,JAK1,JUN,NFKB1,NFKB2,NFkB (complex),NR3C1,RB1,RELA,STAT1,STAT3,STAT5A,STAT5B
TFRC		transporter	Inhibited	-2	3.61e-05	ANXA2,CDKN1A,CHAC1,TGFB2,TNFRSF12A
ACVR1		kinase			3.74e-05	CDKN1A,ICAM1,SAMD9L,VCAM1	ACVR1,ACVR2A,BMPR2,EGR1,MYC,P38 MAPK,PPARG,SMAD1,SMAD5,YAP1,ZFP36
methyl methanesulfonate		chemical toxicant		1.972	3.74e-05	CDKN1A,GADD45B,ST14,TP53INP1	FOXO3,NFKBIA,NOTCH1,NR3C1,RB1,TP53,methyl methanesulfonate
decitabine		chemical drug	Activated	3.029	4.05e-05	ANKRD1,ANXA2,BIRC3,CDKN1A,GADD45B,INPPL1,NFKBIA,PAK3,PDLIM4,S100A10,SFN,ST14,TGFB2	FOXO3,NFKBIA,NFkB (complex),NOTCH1,NR3C1,RB1,RNA polymerase II,TP53,decitabine,hydrocortisone
BMP10		growth factor			4.08e-05	ICAM1,NFKBIA,VCAM1
RHOB	0.067	enzyme			4.08e-05	CDKN1A,ICAM1,RHOB	FOXO1,NFKB1,PPARG,RHOA,RHOB,SMAD1,YAP1
concanamycin A		chemical drug			4.08e-05	ICAM1,NFKBIA,VCAM1	FOS,HDAC3,IL18,IL1B,JUN,NFKB1,NFKBIA,NFkB (complex),NR3C1,RELA,STAT5A,concanamycin A
prostaglandin A2		chemical - endogenous non-mammalian			4.08e-05	CDKN1A,ICAM1,VCAM1	CDH5,CEBPA,EGR1,ERK,ETV5,FOXO1,JUN,MYC,NFKB1,NFKBIA,NFkB (complex),NfkB1-RelA,P38 MAPK,PPARA,PPARG,RELA,STAT5A,YAP1,ZFP36,prostaglandin A2
ZMPSTE24		peptidase			4.09e-05	CDKN1A,GADD45B,ICAM1,LMNA	FOXO3,IL6,JUN,NFKB1,NFKBIA,NFkB (complex),ZMPSTE24
MAPT		other			4.15e-05	AARS1,ARF6,C3,CDKN1A,FKBP1A,GPM6B,NFKB2,PAK3,PPP2R1A
Immunoglobulin		complex	Activated	2.489	4.19e-05	BCL3,BIRC3,CASP4,CCL20,CXCL16,ICAM1,NFKB2,NFKBIA,OSBPL3,PDLIM4,RELB,VCAM1	FOS,HDAC3,IL1B,IL33,Immunoglobulin,JUN,NFKB1,NFKB2,NFKBIA,NFkB (complex),NOTCH1,NR3C1,PRKCD,RELA,RELB
PI3K (complex)		complex	Activated	2.183	4.33e-05	BIRC3,CDKN1A,ICAM1,LASP1,NFKB2,NFKBIA,RHOB,VCAM1	FOS,FOXO1,GATA3,HDAC3,IKBKB,IRF1,JUN,NFKB1,NFKB2,NFKBIA,NFkB (complex),NR3C1,PI3K (complex),PPARG,PRKCD,RELA,RHOA,SMAD1,STAT5A,TP53,YAP1
Tgf beta		group		1.166	4.43e-05	ADGRE5,CDKN1A,GADD45B,HNRNPAB,PMEPA1,RHOB,TNFRSF12A,VCAM1	AR,CEBPA,CEBPD,FOXO3,IL6,JUN,MYC,NFKB1,NFKBIA,NFkB (complex),SMAD1,SMAD3,SMAD4,SMAD7,TGFB1,Tgf beta
SMAD1		transcription regulator		1.98	4.47e-05	CDKN1A,GADD45B,ICAM1,VCAM1	EGR1,MYC,P38 MAPK,PPARG,SMAD1,YAP1,ZFP36
GDF2		growth factor	Activated	2.149	4.48e-05	GADD45B,ICAM1,NFKBIA,VCAM1,YWHAH	ACVRL1,GDF2,NFkB (complex),SMAD1,SMAD5
ZFP36		transcription regulator	Inhibited	-2.19	4.48e-05	BIRC3,CDKN1A,ICAM1,NFKBIA,VCAM1	CSF2,JUN,NFKB1,NFKBIA,NFKBIB,NFkB (complex),NOTCH1,RELA,RELB,STAT3,STAT5A,Tnf (family),ZFP36
GFI1		transcription regulator	Inhibited	-2.449	4.55e-05	BCL3,CDKN1A,ICAM1,NFKB2,NFKBIA,RELB	ESR1,GFI1,IL1B,JUN,NFKB1,NFKBIA,NFkB (complex),NOTCH1,RELA,RELB,STAT5A,TNF
PRKAA1		kinase		-1.342	4.55e-05	BIRC3,CDKN1A,NFKBIA,PMEPA1,VCAM1,ZFP36L1	EPAS1,FOXO1,FOXO3,HDAC3,JUN,NFKB1,NFKB2,NFKBIA,NFkB (complex),NOTCH1,NR3C1,PI3K (complex),PRKAA1,REL,RELA,RELB,palmitic acid
CD40		transmembrane receptor	Activated	2.413	4.75e-05	BIRC3,CDKN1A,ICAM1,NFKB2,NFKBIA,TAPBP,VCAM1	CD40,CEBPD,EPAS1,ERK1/2,FOXO1,IKBKB,IRF1,JUN,NFKB1,NFKB2,NFKBIA,NFkB (complex),NR3C1,PI3K (complex),PRKCD,RELA,RELB
ERBB2		kinase		0.529	4.78e-05	ANXA2,BCL3,BIRC3,CCL20,CD47,CDKN1A,CLDN4,GPM6B,ICAM1,NFKB2,PDLIM4,PMEPA1,RHOB,TAPBP	CD44,CEBPD,ERBB2,ERK1/2,FOS,FOXO1,FOXO3,HDAC3,JUN,NFKB1,NFKBIA,NFkB (complex),NOTCH1,NR3C1,RB1,RELA,RELB,TP53
PPP2R5C		other			4.94e-05	BCL3,BIRC3,RELB	JUN,NFKB1,NFKBIA,NFkB (complex),PPP2R5C,RELA,STAT5A
erlotinib		chemical drug	Activated	2.219	4.97e-05	CCL20,ICAM1,NFKB2,NFKBIA,RELB	ESR1,IL1A,JUN,NFKB1,NFKBIA,NFkB (complex),RELA,STAT5A,TNF,erlotinib
paclitaxel		chemical drug		0.416	5.22e-05	BIRC3,CD47,CDKN1A,FLNA,GADD45B,ICAM1,NFKBIA,TP53INP1	CCND1,E2F1,EGR1,ELAVL1,ESR1,FADD,FOXO1,FOXO3,JUN,MYC,NFKB1,NFkB (complex),PPARG,RELA,RNA polymerase II,SIRT1,TNF,paclitaxel
PROC		peptidase		-1.154	5.29e-05	DDX21,ICAM1,NFKB2,VCAM1	F2R,FOS,FOXO1,GATA3,NFKB1,Nfat (family),PPARG,PROC,RHOA,S1PR1,SMAD1,YAP1
tretinoin		chemical - endogenous mammalian	Activated	3.232	5.33e-05	ANXA2,BCL3,BIRC3,C3,CCL20,CD47,CDKN1A,DDAH2,DYNLL1,ICAM1,IFNGR1,PAM,PDLIM4,S100A10,SAMD9L,SERPINB9,TGFB2,TNIP1,VCAM1	CEBPD,ERK1/2,ESR1,FOS,FOXO1,HDAC3,IL17A,JUN,NFKB1,NFKB2,NFKBIA,NFkB (complex),NR3C1,RELA,TNF,TNFRSF1A,tretinoin
EZH2		transcription regulator		0.277	5.36e-05	BIRC3,C3,CDKN1A,CTNNA1,ICAM1,LTB,NFKBIA,SFN,TGFB2	EZH2,GATA3,NFKB1,NFKBIA,NFkB (complex),NOTCH1,RELA,RELB
APP		other		1.156	5.41e-05	ARF6,C3,CCL20,CDKN1A,FKBP1A,FLNA,GPM6B,ICAM1,PAK3,PPP2R1A,Serpinb6b,TP53INP1,VCAM1,ZFP36L1	AGER,APP,CEBPD,EGR1,ERK1/2,FOXO1,JUN,LDL,MYC,NFKB1,NFKB2,NFKBIA,NFkB (complex),P38 MAPK,PPARG,RELA,STAT1,YAP1,ZFP36
C66		chemical reagent			5.42e-05	ICAM1,VCAM1	C66,CEBPD,EGR1,ERK1/2,FOXO1,JUN,MYC,NFkB (complex),P38 MAPK,PPARG,RELA,YAP1,ZFP36
ethyl gallate		chemical - endogenous non-mammalian			5.42e-05	ICAM1,VCAM1
2-bromoethylamine		chemical reagent	Activated	2	5.74e-05	ANXA2,CLDN4,S100A10,TNFRSF12A
Ifnar		group	Activated	2.169	5.79e-05	APOBEC3B,C3,IFNGR1,TAPBP,VCAM1
EGFR		kinase		-1.038	5.86e-05	BCL7C,CASP4,CD47,CDKN1A,GPM6B,ICAM1,IQUB,NFKBIA,RHOB,RRAS	AR,Akt,EGFR,EPAS1,FOXO1,GATA3,HMGB1,JUN,KRAS,NFKB1,NFkB (complex),NR3C1,PARP1,PI3K (complex),PPARG,RELA,RHOA,SMAD1,STAT3,TP53,YAP1
HDAC3		transcription regulator			6.08e-05	BIRC3,CDKN1A,ICAM1,NFKBIA,RELB	HDAC3,JUN,NFKB1,NFKBIA,NFkB (complex),RELA,RELB,STAT5A,vorinostat
allopurinol		chemical drug	Activated	2.236	6.39e-05	ANXA2,BIRC3,CLDN4,S100A10,TNFRSF12A
PRKAG3		other			7.99e-05	ANKRD1,CRYBG3,CTNNA1,FXYD6,PAM,PPP1R14B
nitrofurantoin		chemical drug		0.896	7.99e-05	ANXA2,C3,NFKBIA,S100A10,TNFRSF12A,VCAM1
OGA		enzyme		-0.854	8.08e-05	CCL20,CD47,CDKN1A,CXCL16,FLNA,RHOB,SERPINB9,ST14,TNFRSF12A
indomethacin		chemical drug		1.672	8.18e-05	ANXA2,BIRC3,CDKN1A,CLDN4,DYNLL1,S100A10,TNFRSF12A	FOXO1,JUN,NFKB1,NFkB (complex),PPARA,PPARG,PTGS2,STAT3,indomethacin,prostaglandin E2
11,12-epoxyeicosatrienoic acid		chemical - endogenous mammalian			8.2e-05	ICAM1,NFKBIA,VCAM1	11,12-epoxyeicosatrienoic acid,E2F1,EGR1,FOXO1,FOXO3,JUN,MYC,NFKB1,NFKBIA,NFkB (complex),RELA,STAT5A
DETA-NONOate		chemical reagent		-0.13	8.43e-05	BIRC3,CDKN1A,ICAM1,VCAM1	CEBPD,DETA-NONOate,ERK1/2,FOXO1,GATA3,HMGB1,JUN,NFKB1,NFKBIA,NFkB (complex),NOTCH1,PARP1,PPARG,PRKCE,RELA,RELB,RHOA,SMAD1,STAT3,YAP1
NFKBIB		transcription regulator			8.43e-05	ICAM1,NFKBIA,TP53INP1,VCAM1	FOXO3,IKBKB,IL6,IRF1,JUN,NFKB1,NFKBIA,NFKBIB,NFkB (complex),NOTCH1,RELA,RELB,TNFAIP3,cytokine
FGF2		growth factor		1.021	8.53e-05	CCL20,CDKN1A,FLNA,ICAM1,LMNA,S100A10,TGFB2,TNFRSF12A,VCAM1	EGR1,ESR1,FGF2,FOXO1,HDAC3,MYC,NFKBIA,Nfat (family),P38 MAPK,PPARA,PPARG,PRKCA,RB1,RELA,SMAD4,SP1,VEGFA,VHL,YAP1,ZFP36
methotrexate		chemical drug		-0.341	8.61e-05	C3,CASP4,CDKN1A,ICAM1,TP53INP1,VCAM1,ZFP36L1	AGER,CEBPD,E2F1,ERK1/2,FOXO1,FOXO3,IL1B,IL6,JUN,NFKB1,NFKB2,NFKBIA,NFkB (complex),RELA,SIRT1,hydrogen peroxide,methotrexate
SMAD4		transcription regulator		1.085	8.83e-05	CCL20,CDKN1A,GADD45B,ICAM1,NFKBIA,PAK3,TGFB2	AR,CEBPA,CEBPD,ESR1,HDAC3,NFKB1,NFKBIA,NFkB (complex),RB1,REL,RELA,SMAD1,SMAD2,SMAD3,SMAD4,SMAD7,SP1
gentamicin		chemical drug	Activated	2.607	9.06e-05	ARF6,ICAM1,NEURL3,PTP4A1,VCAM1,YWHAH,ZFP36L1	Nfat (family),Sod,gentamicin
LY294002		chemical - kinase inhibitor	Inhibited	-3.068	9.32e-05	BIRC3,CASP4,CDKN1A,CLDN4,CXCL16,ICAM1,LMNA,NFKBIA,SFN,VCAM1	E2F1,EGR1,FOS,FOXO1,FOXO3,GATA3,HDAC3,HMGB1,IGF1,JUN,LY294002,NFKB1,NFKB2,NFkB (complex),NR3C1,PARP1,PRKCD,RELA,STAT3,TP53,prostaglandin E2
2-mercaptoacetate		chemical drug			9.53e-05	ANXA2,ICAM1,S100A10
CYP2J2		enzyme			9.53e-05	ICAM1,NFKBIA,VCAM1	CYP2J2,JUN,NFKB1,NFKBIA,NFkB (complex),RELA,STAT5A
TNFSF12		cytokine	Activated	2.195	9.7e-05	ICAM1,NFKB2,NFKBIA,TNFRSF12A,VCAM1	BIRC3,CD40,CD40LG,CXCL8,FOXO3,IL6,JUN,NFKB1,NFKB2,NFKBIA,NFkB (complex),REL,RELA,RELB,TNFSF12
glutamine		chemical - endogenous mammalian			9.7e-05	AARS1,CDKN1A,ICAM1,NFKB2,NFKBIA	BCL2,EPAS1,FOXO1,FOXO3,IKBKB,IRF1,JUN,NFKB1,NFKBIA,NFkB (complex),NR3C1,PI3K (complex),RB1,RELA,SP1,STAT5A,TP53,glutamine,palmitic acid
NCOR2		transcription regulator			0.000104	BIRC3,C3,CDKN1A,RELB	ESR1,HDAC3,NCOR2,NFkB (complex),RELA,SP1,estrogen receptor
EIF2AK3		kinase			0.000106	AARS1,BIRC3,CCL20,NFKB2,RELB	EIF2AK3,JUN,NFKB1,NFKBIA,NFkB (complex),RELA,STAT5A
ADIPOQ		other		1.131	0.000107	BCL3,CCL20,CDKN1A,ICAM1,NFKBIA,VCAM1	ADIPOQ,FOXO3,IL10,IL1A,IL6,JUN,NFKB1,NFKB2,NFKBIA,NFkB (complex),NOTCH1,RELA,RELB,STAT3
RRM2B		enzyme			0.000108	CDKN1A,TP53INP1
FOXO3		transcription regulator		-0.012	0.000108	CASP4,CDKN1A,GADD45B,ICAM1,NFKBIA,TGFB2,TP53INP1,VCAM1	E2F1,EGR1,ESR1,FOXO1,FOXO3,GATA3,HMGB1,IL6,JUN,NFKB1,NFKBIA,NFkB (complex),PARP1,RELA,RNA polymerase II,SIRT1,STAT3,TNF
IKK (complex)		complex			0.00011	BIRC3,ICAM1,VCAM1	CXCL8,HMGB1,IKBKB,IKK (complex),IRF1,NFKB1,NFKBIA,NFKBIE,NFkB (complex),NOTCH1,RELA,RELB,curcumin
lactosylceramide		chemical - endogenous mammalian			0.00011	ICAM1,RELB,VCAM1	JUN,NFKB1,NFKBIA,NFkB (complex),Nfat (family),PPARA,PRKCA,RB1,RELA,RELB,STAT5A,lactosylceramide
5-fluorouracil		chemical drug		1.182	0.000115	ANXA2,CDKN1A,FKBP1A,HNRNPAB,RHOB,SFN,TNFRSF12A,ZFP36L1	5-fluorouracil,ERK,ETV5
estrogen receptor		group		0.298	0.000116	C3,CLDN4,F11R,HTRA2,ICAM1,SERPINB9,TGFB2	4-hydroxytamoxifen,ESR1,ESR2,ID2,JUN,NFKBIA,REL,estrogen,estrogen receptor,fulvestrant
trichostatin A		chemical drug		1.486	0.000116	ANKRD1,CDKN1A,ICAM1,INPPL1,LMNA,NFKB2,NFKBIA,PAK3,RELB,RHOB,S100A10,VCAM1,YWHAH	AR,Akt,FOS,HDAC3,IKBKB,IL1B,IRF1,JUN,NFKB1,NFKBIA,NFkB (complex),NOTCH1,NR3C1,RELA,RELB,YAP1,trichostatin A
gefitinib		chemical drug			0.000117	C3,GADD45B,NFKB2,RELB,RHOB,TP53INP1
emodin		chemical drug		0	0.000119	CDKN1A,CLDN4,ICAM1,VCAM1	BCL2,CEBPD,EGR1,ERK1/2,FOXO1,JUN,MYC,NCOR2,NFKBIA,NFkB (complex),P38 MAPK,PPARG,RB1,RELA,SP1,TP53,YAP1,ZFP36,emodin,troglitazone
MYB		transcription regulator		-1.432	0.000121	BIRC3,C3,CXCL16,ICAM1,NEURL3,NFKB2	JUN,MYB,NFKB1,NFKB2,NFkB (complex),PRKCD,REL,RELA,THPO,TP53
NfkB-RelA		complex			0.000126	ICAM1,NFKBIA,VCAM1
Ro41-5253		chemical reagent			0.000126	CDKN1A,IFNGR1,TGFB2	FOXO3,RB1,Ro41-5253,SP1,TP53
epicatechin gallate		chemical drug			0.000126	CDKN1A,ICAM1,VCAM1	CEBPD,E2F1,EGR1,ERK1/2,FOXO1,FOXO3,IGF1,JUN,MYC,NFKB1,NFKB2,NFKBIA,NFkB (complex),P38 MAPK,PPARG,PRKCD,RELA,RELB,TP53,YAP1,ZFP36,epicatechin gallate
BNIP3L		other		-0.577	0.000127	CD47,LTB,NFKB2,NFKBIA
phenylbutazone		chemical drug		1.98	0.000127	ANXA2,CLDN4,S100A10,TNFRSF12A
hyaluronic acid		chemical - endogenous mammalian	Activated	2.158	0.000131	BCL3,ICAM1,NFKBIA,TGFB2,VCAM1	CXCL8,FOXO3,HDAC3,IL6,JUN,NFKB1,NFKBIA,NFkB (complex),Nfat (family),PPARA,PRKCA,RB1,REL,RELA,SMAD3,SMAD4,SMAD7,hyaluronic acid
MRTFA		transcription regulator	Activated	2.425	0.000132	ANKRD1,F11R,FLNA,ICAM1,LMNA,TGFB2	EZH2,MRTFA,MRTFB,SMAD7,WWTR1,YAP1
chelerythrine		chemical drug			0.000144	ICAM1,NFKBIA,VCAM1	BCL2,FOXO3,GATA3,HMGB1,IL6,JUN,NFKB1,NFKBIA,NFkB (complex),PARP1,RB1,RELA,RELB,SP1,STAT3,STAT5A,TP53,chelerythrine
IL10		cytokine		-0.762	0.000148	BCL3,CCL20,CDKN1A,CXCL16,ICAM1,LTB,PAM,STX11,VCAM1	FOS,IFNG,IL10,IL4,IRF1,JUN,NFKB1,NFKBIA,NFkB (complex),NOTCH1,REL,RELA,RELB,S100A8,SP1,STAT3,STAT6
PTGS2		enzyme	Activated	2.149	0.000149	ANXA2,BIRC3,CDKN1A,DYNLL1,ICAM1,TNFRSF12A	ERBB2,FOXO1,HMGB1,JUN,NFKB1,NFKBIA,NFkB (complex),PPARA,PPARG,PTGS2,RELA,STAT3,TP53,curcumin,indomethacin,prostaglandin E2
NOTCH1		transcription regulator		1.859	0.000154	ANKRD1,BIRC3,CDKN1A,ICAM1,NFKB2,RELB,TGFB2	AKT1,AR,IKBKB,IRF1,JUN,NFKB1,NFKB2,NFKBIA,NFkB (complex),NOTCH1,RELA,RELB,STAT5A,TP53
IRF1		transcription regulator		1.458	0.000158	CCL20,CDKN1A,CXCL16,LTB,TAPBP,VCAM1	CEBPD,ERK1/2,FOS,FOXO1,IFNG,IRF1,JUN,NFKB1,NFKBIA,NFkB (complex),NOTCH1,RELA,RELB,STAT3
P2RY2		g-protein coupled receptor			0.000163	CDKN1A,ICAM1,VCAM1	CEBPD,CXCL8,ERK1/2,FOXO1,FOXO3,IL6,JUN,NFKB1,NFKBIA,NFkB (complex),Nfat (family),P2RY2,PPARG,RELA,RHOA,SMAD1,UTP,YAP1
tosylphenylalanyl chloromethyl ketone		chemical - protease inhibitor			0.000163	BIRC3,ICAM1,VCAM1	CEBPD,CXCL8,ERK1/2,FOXO1,IL1B,JUN,NFKB1,NFKBIA,NFkB (complex),NOTCH1,RELA,RELB,tosylphenylalanyl chloromethyl ketone
PD98059		chemical - kinase inhibitor		-1.885	0.000166	ANKRD1,APOBEC3B,C3,CCL20,CDKN1A,HNRNPAB,ICAM1,S100A10,VCAM1,ZFP36L1	CEBPD,EGF,ERK1/2,FOS,FOXO1,HMGB1,JUN,MYC,NFKB1,NFKB2,NFKBIA,NFkB (complex),PD98059,PPARG,RELA,SMAD1,STAT1,STAT3,TNFRSF1A
testosterone		chemical - endogenous mammalian		-0.018	0.000179	ANKRD1,BCL3,CDKN1A,NFKB2,NFKBIA,PTP4A1,TGFB2,VCAM1	ADIPOQ,AR,ATF4,Akt,E2F1,EGR1,FOXO1,FOXO3,JUN,MYC,NCOA3,NFKB1,NFKBIA,NFkB (complex),RB1,RELA,SP1,STAT3,TP53,YAP1,testosterone
2-cyclohexen-1-one		chemical - endogenous non-mammalian			0.00018	ICAM1,VCAM1
ATPase		group			0.00018	ICAM1,VCAM1
Hbb		other			0.00018	ICAM1,VCAM1
Mst/krs		group			0.00018	NFKB2,RELB
NUP98		transporter			0.00018	CDKN1A,YWHAH
PFN1		other			0.00018	ANXA2,VCAM1
SMPD3		enzyme			0.00018	ICAM1,VCAM1	EGR1,EPAS1,FOXO1,JUN,NFKB1,NFKBIA,NFkB (complex),NR3C1,PI3K (complex),PPARG,RELA,RNA polymerase II,SIRT1,SMAD4,SMAD7,SMPD3,hyaluronic acid
elocalcitol		chemical drug			0.00018	IFNGR1,TGFB2
orantinib		chemical drug			0.00018	ICAM1,VCAM1	CEBPD,ERK1/2,FOXO1,FOXO3,Hsp70,JUN,NFkB (complex),NR3C1,RELA,orantinib
RNA polymerase II		complex			0.00018	CDKN1A,GADD45B,ICAM1,IFNGR1,NFKBIA,SFN,TAPBP
EGLN1		enzyme		1	0.000185	CCL20,ICAM1,TGFB2,VCAM1	EGLN1,WWTR1
PRKCA		kinase		1.749	0.000187	CDKN1A,ICAM1,NFKBIA,TGFB2,VCAM1	BCL2,EPAS1,GATA3,HMGB1,JUN,NFKB1,NFKB2,NFKBIA,NFkB (complex),NR3C1,Nfat (family),PARP1,PI3K (complex),PRKCA,PRKCD,RB1,RELA,SP1,STAT3,TP53
PSMB11		peptidase	Inhibited	-2.161	0.000187	CLDN4,GADD45B,RHOB,TGFB2,TNFRSF12A
SOX4		transcription regulator	Activated	2.433	0.000193	ADGRE5,CHAC1,CTNNA1,DDAH2,Gm12854/S100a11,LHFPL6
GNAQ		enzyme			0.000201	ANKRD1,RHOB,TGFB2,VCAM1,ZFP36L1	AKT1,AR,Akt,GNAQ,JUN,NFKB1,NFKBIA,RELB,TP53,YAP1
BMPR2		kinase			0.000206	CLIC4,ICAM1,VCAM1	BMPR2,SMAD1,SMAD5
UTP		chemical - endogenous mammalian			0.000206	FLNA,ICAM1,VCAM1	E2F1,EGR1,IKK (complex),JUN,MAPKAPK2,MYC,NFKB1,NFKBIB,NFKBIE,NFkB (complex),Nfat (family),P2RY2,P38 MAPK,PPARG,RELA,UTP,YAP1,ZFP36
VCP		enzyme			0.000206	LMNA,NFKB2,VCAM1	NFKB1,NFKB2,NFkB (complex),RELA,RELB,VCP
WR 1065		chemical drug			0.000206	CASP4,CDKN1A,ZFP36L1
trovafloxacin		chemical drug	Activated	2	0.000207	BIRC3,CDKN1A,ICAM1,NFKBIA	ESR1,FOS,IFNG,IL1B,JUN,NFKB1,NFKBIA,NFkB (complex),RELA,STAT3,TNF,trovafloxacin
TGFBR2		kinase		1.951	0.000221	CDKN1A,CLIC4,GADD45B,ICAM1,TGFB2,TNFRSF12A	AR,FOXO3,JUN,MYC,NCOA3,NFKBIA,SMAD1,SMAD2,SMAD3,SMAD4,SP1,TGFB1,TGFBR2,Tgf beta
dihydrotestosterone		chemical - endogenous mammalian	Activated	2.301	0.000222	CDKN1A,CYTH2,DYNLL1,Gm12854/S100a11,NFKBIA,PAM,PMEPA1,RHOB,TGFB2,VCAM1	AR,ATF4,Akt,FOXO1,JUN,MYC,NCOA3,NFKB1,PPARG,RHOA,SMAD1,SMAD3,YAP1,dihydrotestosterone
TP63		transcription regulator		1.091	0.000227	APOBEC3B,BCL3,BOK,CDKN1A,F11R,MLPH,RELB,SFN,TGFB2
STAT5B		transcription regulator		0	0.000229	ADGRV1,ANKRD1,BIRC3,CASP4,CDKN1A,GADD45B,LTB	AKT1,AR,CASP3,FOXO3,JUN,NFKB1,NFKBIA,NFkB (complex),RB1,RELA,RELB,STAT1,STAT3,STAT5A,STAT5B,TP53
TRADD		other			0.00023	ICAM1,NFKBIA,VCAM1	FOXO1,FOXO3,IKBKB,IL1B,IL6,IRF1,JUN,NFKB1,NFKBIA,NFkB (complex),PPARG,RELA,RHOA,SMAD1,STAT5A,TRADD,YAP1
IGF1		growth factor	Activated	2.203	0.000237	BIRC3,CDKN1A,ICAM1,LASP1,NFKBIA,SFN,TNFRSF12A,VCAM1,ZFP36L1	E2F1,EGR1,EPAS1,ERK,ETV5,FOXO1,FOXO3,HDAC3,IGF1,JUN,NFKB1,NFKBIA,NFKBIB,NFkB (complex),NR3C1,PI3K (complex),PPARG,RELA,RNA polymerase II,SIRT1,Tnf (family),YAP1,cisplatin
etoposide		chemical drug	Activated	2.429	0.000252	BIRC3,CDKN1A,ICAM1,NFKB2,RELB,SFN	EPAS1,ESR1,IKBKB,IKBKG,IRF1,JUN,NFKB1,NFKB2,NFKBIA,NFkB (complex),PRKCB,PRKCD,RELA,SIRT1,etoposide
ACTL6A		other			0.000256	CDKN1A,SFN,TP53INP1
ROCK1		kinase			0.000256	ICAM1,TGFB2,VCAM1	FOXO1,MYC,NFKB1,NFkB (complex),PPARG,RELA,RHOA,ROCK1,Rock,SMAD1,YAP1
linoleic acid		chemical - endogenous mammalian		-1	0.000259	CD47,ICAM1,NFKBIA,VCAM1	ESR1,FOXO3,IL6,JUN,MYC,NFKB1,NFKBIA,NFkB (complex),RELA,Rock,TNF,YAP1,linoleic acid
TLR4		transmembrane receptor	Activated	2.752	0.000266	APOBEC3B,C3,CCL20,ICAM1,NFKB2,NFKBIA,RELB,VCAM1	IKBKB,IRF1,JUN,MYD88,NFKB1,NFKB2,NFKBIA,NFkB (complex),PRKCD,RELA,RELB,STAT3,TICAM1,TLR4
Iberiotoxin		chemical reagent			0.000269	ICAM1,VCAM1
KCNK2		ion channel			0.000269	ICAM1,VCAM1
Rp-8-pCPT-cGMPS-triethylamine		chemical reagent			0.000269	CDKN1A,S100A10
adenosine dialdehyde		chemical reagent			0.000269	ICAM1,VCAM1
miR-34a-5p (and other miRNAs w/seed GGCAGUG)		mature microrna	Inhibited	-2.2	0.000269	CD47,CDKN1A,ICAM1,SAMD9L,TP53INP1
TRAF3IP2		other		1.982	0.000273	CXCL16,ICAM1,TNFRSF12A,VCAM1	FOS,FOXO3,IKBKB,IKK (complex),IL18,IL6,IRF1,Immunoglobulin,JUN,NFKB1,NFKBIA,NFKBIB,NFKBIE,NFkB (complex),RELA,TRAF3IP2
tyrphostin AG 1478		chemical - kinase inhibitor		-1.969	0.000273	CDKN1A,ICAM1,S100A10,VCAM1	EGF,EGR1,FOXO1,GATA3,HMGB1,JUN,MYC,NFKB1,NFKBIA,NFkB (complex),Nfat (family),PARP1,PPARA,PPARG,PRKCA,RB1,RELA,RHOA,SMAD1,STAT3,YAP1,tyrphostin AG 1478
IL12 (complex)		complex	Activated	2.208	0.000273	BCL3,CCL20,GADD45B,ICAM1,IFNGR1,LTB	ESR1,FOXO3,IL10,IL12 (complex),IL6,JUN,NFKB1,NFKB2,NFKBIA,NFkB (complex),RELA,STAT3,STAT5A,STAT6,TNF
LLGL2		other			0.000283	ANKRD1,LHFPL6,TGFB2
PRKDC		kinase			0.000283	BIRC3,CDKN1A,VCAM1	FOS,GATA3,HDAC3,HMGB1,IGFBP3,JUN,NFKB1,NFkB (complex),NR3C1,PARP1,PRKDC,RELA,STAT3
glucocorticoid		chemical drug		-0.781	0.0003	BCL3,CDKN1A,ICAM1,NFKBIA,STX11,TGFB2,VCAM1	FOS,FOXO3,IFNG,IL10,IL1A,IL6,JUN,NFKB1,NFKB2,NFKBIA,NFkB (complex),RELA,STAT3,cytokine,glucocorticoid
FN1		enzyme		0	0.00031	BIRC3,CDKN1A,CLIC4,FLNA,NFKBIA,TNIP1	CCND1,EGR1,ELAVL1,ESR1,FN1,HDAC3,MAP2K1,MYC,NCOA3,NFKB1,NFKB2,NFkB (complex),P38 MAPK,PPARG,REL,RELA,RELB,SP1,YAP1,ZFP36,estrogen receptor
THBS4		other			0.000312	ICAM1,TGFB2,VCAM1
resveratrol		chemical drug		-0.092	0.000313	BIRC3,CDKN1A,DYNLL1,ICAM1,NFKBIA,TGFB2,VCAM1	E2F1,EGR1,EPAS1,FOXO1,FOXO3,JUN,MYC,NFKB1,NFKB2,NFKBIA,NFkB (complex),NR3C1,Nfat (family),PI3K (complex),PPARA,PRKCA,PRKCD,RB1,RELA,palmitic acid,resveratrol
simvastatin		chemical drug		-0.02	0.000318	CCL20,CDKN1A,ICAM1,NFKBIA,RHOB,VCAM1	ADIPOQ,ANGPT2,ATF2,F2,FOXO1,FOXO3,IL1B,JUN,NFKB1,NFKBIA,NFkB (complex),PPARG,RELA,RHOA,SMAD1,STAT3,YAP1,simvastatin
PGR		ligand-dependent nuclear receptor	Activated	2.586	0.000325	BIRC3,CDKN1A,DDX21,DYNLL1,ICAM1,NFKBIA,PTP4A1	AR,CEBPD,ERK1/2,ESR1,ESR2,FOXO1,GATA3,JUN,NFkB (complex),NR3C1,PGR,PPARA,PTGS2,RELA,RNA polymerase II,STAT5A,TP53,estrogen receptor,mifepristone,progesterone
ERK1/2		group		1.65	0.000352	BIRC3,C3,CCL20,CDKN1A,ICAM1,TAPBP,VCAM1	EGR1,ERK1/2,FOS,FOXO1,HDAC3,IL1B,JUN,NFKB1,NFKBIA,NFkB (complex),NR3C1,PPARG,RELA,RELB,RNA polymerase II,SIRT1,STAT5A
hydrogen peroxide		chemical - endogenous mammalian	Activated	2.176	0.000358	ANKRD1,ANXA2,BIRC3,CDKN1A,DDAH2,GADD45B,ICAM1,TP53INP1,VCAM1	E2F1,EGR1,EPAS1,ESR1,FOXO1,FOXO3,MYC,NFKB1,NFKB2,NFKBIA,NFkB (complex),PPARG,RELA,RNA polymerase II,SIRT1,TNFRSF1A,hydrogen peroxide
ciglitazone		chemical drug		0.299	0.000369	CDKN1A,ICAM1,NFKBIA,VCAM1	CXCL8,EGR1,GATA3,JUN,MYC,NFKB1,NFKBIA,NFkB (complex),NOTCH1,NR3C1,P38 MAPK,PPARG,RELA,RELB,STAT5A,TP53,YAP1,ZFP36,ciglitazone
romidepsin		biologic drug			0.000369	CDKN1A,DDX21,ICAM1,RHOB	EPAS1,JUN,NFKB1,NR3C1,PI3K (complex),RELA,romidepsin
12-hydroxyeicosatetraenoic acid		chemical - endogenous mammalian			0.000375	ICAM1,VCAM1	12-hydroxyeicosatetraenoic acid,CEBPA,EGR1,FOXO1,JUN,MYC,NFKBIA,Nfat (family),NfkB1-RelA,P38 MAPK,PPARA,PPARG,PRKCA,RB1,RELA,YAP1,ZFP36
15-E2-isoketal modified phosphatidylethanolamine		chemical reagent			0.000375	ICAM1,VCAM1	15-E2-isoketal modified phosphatidylethanolamine,EGR1,MYC,P38 MAPK,PPARG,YAP1,ZFP36
CACNA1C		ion channel			0.000375	ANXA2,S100A10
KLKB1		peptidase			0.000375	ICAM1,VCAM1	CEBPD,ERK1/2,FOXO1,JUN,KLKB1,NFkB (complex),RELA
P2RY4		g-protein coupled receptor			0.000375	ICAM1,VCAM1
TBXA2R		g-protein coupled receptor			0.000375	ICAM1,VCAM1	EZH2,FOXO1,I-BOP,MRTFA,MRTFB,NFKB1,PPARG,RHOA,SMAD1,SMAD7,TBXA2R,WWTR1,YAP1
TCIM		other			0.000375	ICAM1,VCAM1
TP53INP1	0.023	other			0.000375	CDKN1A,TP53INP1
TSPO		transmembrane receptor			0.000375	ICAM1,VCAM1	Nfat (family),TSPO,dehydroisoandrosterone
gliotoxin		chemical toxicant			0.000375	BIRC3,CCL20
polyphosphate		chemical - endogenous mammalian			0.000375	ICAM1,VCAM1	EGR1,FGF2,FOXO1,HMGB1,JUN,MYC,NFKB1,NFKBIA,NFkB (complex),RELA,SP1,STAT3,polyphosphate
vinpocetine		chemical drug			0.000375	ICAM1,VCAM1	IKK (complex),NFKB1,NFKBIB,NFKBIE,NFkB (complex),RELA,vinpocetine
VTN		other			0.000377	CDKN1A,S100A10,SFN
IgG		complex		-1.3	0.000377	C3,CDKN1A,CLDN4,ST14,TAPBP,VCAM1
JUND		transcription regulator			0.000406	BCL3,C3,CXCL16,SERPINB9	FOS,HDAC3,IFNG,JUN,JUNB,JUND,NFKB1,NFkB (complex),NR3C1,RELA,STAT3
dehydroisoandrosterone		chemical - endogenous mammalian			0.000406	ICAM1,NFKBIA,PTP4A1,VCAM1	ESR2,FOXO1,FOXO3,MYC,NFKB1,NFKBIA,NFkB (complex),NR3C1,Nfat (family),PPARA,PRKCA,RB1,RELA,RIPK2,Rock,YAP1,beta-estradiol,dehydroisoandrosterone
CD3		complex		1.069	0.000407	AARS1,BIRC3,CCL20,FKBP1A,ICAM1,IFNGR1,NFKBIA,PTP4A1,RELB,ZFP36L1	CD3,FAS,IKBKB,IL13,IRF1,JUN,NFKB1,NFKB2,NFKBIA,NFkB (complex),NOTCH1,REL,RELA,RELB
progesterone		chemical - endogenous mammalian		0.06	0.000407	BIRC3,C3,CDKN1A,CLDN4,CTNNA1,ICAM1,NFKBIA,PTBP3,SFN,TGFB2	AGT,ERK,ESR1,ETV5,FOXO3,HDAC3,IL1A,JUN,NFKB1,NFKBIA,NFkB (complex),PPARG,RELA,SP1,TXN,estrogen receptor,progesterone
ABCB4		transporter			0.000412	CCL20,NFKB2,TGFB2
OSCAR		other			0.000412	CCL20,ICAM1,RRAS
MTPN		transcription regulator		1.987	0.000426	LTB,S100A10,TGFB2,VCAM1	ATF2,MTPN
SN-38		chemical drug			0.000449	BIRC3,CCL20,CDKN1A	JUN,NFKB1,NFKBIA,NFkB (complex),RELA,SN-38,STAT5A
Tnf (family)		group		0.911	0.000453	BIRC3,CLDN4,ICAM1,NFKBIA,VCAM1	CXCL8,IKK (complex),NFKB1,NFKB2,NFKBIA,NFKBIB,NFKBIE,NFkB (complex),RELA,TNFAIP3,TNFRSF1A,Tnf (family)
epigallocatechin-gallate		chemical drug		-1.206	0.000466	CDKN1A,GADD45B,ICAM1,NFKBIA,RELB,VCAM1	CHUK,FOXO3,IL6,JUN,NFKB1,NFKB2,NFKBIA,NFkB (complex),Nfat (family),PPARA,PRKCA,PRKCD,RB1,RELA,STAT5A,epigallocatechin-gallate
PP2/AG1879 tyrosine kinase inhibitor		chemical - kinase inhibitor		-1.953	0.000466	BIRC3,CDKN1A,CXCL16,ICAM1	CDH5,CEBPD,ERK1/2,FOXO1,IKBKB,IRF1,JUN,NFKB1,NFKB2,NFKBIA,NFkB (complex),NR3C1,PGR,PP2/AG1879 tyrosine kinase inhibitor,PRKCD,RELA,RELB,RNA polymerase II
8-bromoguanosine 3',5'-cyclic monophosphate		chemical - kinase inhibitor			0.000489	CDKN1A,S100A10,VCAM1	8-bromoguanosine 3',5'-cyclic monophosphate,FOXO1,IL1B,JUN,NFKB1,NFKB2,NFKBIA,NFkB (complex),PPARG,PRKG1,RELA,RHOA,SMAD1,TNFRSF1A,YAP1
ACVRL1		kinase			0.000489	CDKN1A,ICAM1,VCAM1	ACVRL1,JUN,NFKB1,NFKBIA,NFkB (complex),RELA,SMAD1,SMAD5,STAT5A
Ap2		group			0.000489	C3,ICAM1,IFNGR1
CRNDE		other			0.000489	CDKN1A,GADD45B,RRAS
IGFBP3		other			0.000489	CDKN1A,ICAM1,VCAM1	CEBPD,E2F1,EGR1,EPAS1,ERK1/2,FOXO1,FOXO3,IGF1,IGFBP3,JUN,MYC,NFKB1,NFkB (complex),NR3C1,P38 MAPK,PI3K (complex),PPARG,PRKDC,RELA,TP53,YAP1,ZFP36
26s Proteasome		complex		1.808	0.000496	BCL3,BIRC3,CDKN1A,ICAM1,NFKB2	26s Proteasome,ERBB2,FOS,JAK1,JUN,NFKB1,NFKBIA,NFkB (complex),NOTCH1,RELA,RELB,STAT1,STAT3,STAT5A,TP53
SMAD7		transcription regulator	Inhibited	-2.099	0.000496	CDKN1A,ICAM1,NFKBIA,PMEPA1,TGFB2	AR,CEBPA,CEBPD,EGFR,EPAS1,FOXO3,HDAC3,JUN,NFKB1,NFKBIA,NFkB (complex),NR3C1,PI3K (complex),RB1,RELA,SMAD1,SMAD2,SMAD3,SMAD4,SMAD7,SP1,STAT5A,TP53
CCL7		cytokine			0.000498	ICAM1,VCAM1	CCL7,CEBPD,ERK1/2,FOXO1,JUN,NFkB (complex),RELA
DIABLO		other			0.000498	BIRC3,CDKN1A	DIABLO,JUN,NFKB1,NFkB (complex),RELA,TAB1
IL26		cytokine			0.000498	CCL20,ICAM1	FOS,IL26,JUN,NFKB1,NFkB (complex),STAT1,STAT3
LPA		other			0.000498	ICAM1,VCAM1	CXCL8,LPA,NFkB (complex),RELA
N-Cadherin		group			0.000498	CDKN1A,VCAM1	AR,Akt,JUN,N-Cadherin,NFKB1,YAP1
RBCK1		transcription regulator			0.000498	ICAM1,VCAM1	IKK (complex),NFKB1,NFKBIB,NFKBIE,NFkB (complex),RBCK1,RELA
S100A10	0.273	other			0.000498	ANXA2,S100A10
SMARCA1		transcription regulator			0.000498	CDKN1A,SFN
ganglioside GM3		chemical - endogenous mammalian			0.000498	ICAM1,VCAM1	CEBPD,EGR1,EPAS1,ERK1/2,FGF2,FOXO1,JUN,MYC,NFKB1,NFKB2,NFKBIA,NFkB (complex),NR3C1,Nfat (family),PI3K (complex),PPARA,PRKCA,PRKCD,RB1,RELA,SP1,ganglioside GM3
IL6R		transmembrane receptor		0.555	0.00051	CCL20,CDKN1A,ICAM1,VCAM1	CEBPD,EGR1,ERK1/2,FOXO1,FOXO3,IL6,IL6R,JUN,LDL,MYC,NFKB1,NFKBIA,NFkB (complex),RELA,RELB,STAT1,VEGFA,VHL
LYN		kinase			0.00051	BCL3,CDKN1A,NFKB2,NFKBIA	EPAS1,FOS,IL1B,Ige,JUN,LYN,NFKB1,NFKBIA,NFkB (complex),NR3C1,PI3K (complex),RELA,STAT1,STAT3,STAT5A
homocysteine		chemical - endogenous mammalian		1.165	0.00051	ANXA2,CDKN1A,DDAH2,VCAM1	GATA3,HMGB1,NFKB1,NFkB (complex),PARP1,STAT3,homocysteine
PTGER4		g-protein coupled receptor		0.447	0.000511	CCL20,ICAM1,Serpinb6b,TP53INP1,ZFP36L1
NFYA		transcription regulator			0.000533	CDKN1A,GADD45B,ICAM1,RHOB
SNAI1		transcription regulator			0.000542	ANKRD1,CDKN1A,CLDN4,FLNA,LASP1	EZH2,FOXO3,JUN,MRTFA,MRTFB,MYC,SMAD3,SMAD4,SMAD7,SNAI1,TGFB1,WWTR1,YAP1
IL6		cytokine	Activated	2.502	0.000548	ADGRE5,BCL3,C3,CASP4,CCL20,CDKN1A,GADD45B,ICAM1,NFKBIA,TNFRSF12A,VCAM1	HDAC3,IL17A,IL1A,IL1B,IL6,JUN,NFKB1,NFKBIA,NFkB (complex),REL,RELA,STAT5A
SBDS		other			0.000556	CHAC1,GADD45B,PAK3,PTBP3
NQO1		enzyme			0.000574	BIRC3,CDKN1A,VCAM1	CEBPD,ERK1/2,FOXO1,GATA3,HMGB1,IL1B,JUN,NFKB1,NFKBIA,NFkB (complex),NQO1,PARP1,RELA,STAT3,STAT5A
thalidomide		chemical drug			0.000574	BIRC3,GADD45B,ICAM1	IKK (complex),IL1B,JUN,NFKB1,NFKBIA,NFKBIB,NFKBIE,NFkB (complex),RELA,STAT5A,thalidomide
FADD		other		-1	0.000581	BIRC3,CDKN1A,GADD45B,ICAM1	FADD,FAS,IL1B,JUN,NFKB1,NFKB2,NFKBIA,NFkB (complex),NOTCH1,RELA,RELB,STAT5A,TNFRSF1A
NCOA3		transcription regulator		1.029	0.000581	ANKRD1,CDKN1A,NFKBIA,TGFB2	AR,ATF4,Akt,EZH2,JUN,MRTFA,MRTFB,NCOA3,NFKB1,SMAD3,SMAD7,WWTR1,YAP1
CCND1		transcription regulator		-1	0.000582	CDKN1A,FLNA,LASP1,PDLIM4,PMEPA1,PTBP3,TP53INP1
IL13		cytokine		0.484	0.000584	BCL3,C3,CCL20,FKBP1A,ICAM1,IFNGR1,ST14,VCAM1	CEBPD,ERK1/2,FOS,FOXO1,FOXO3,IFNG,IL13,IL1B,IL4,IL6,IRF1,JUN,NFKB1,NFKBIA,NFkB (complex),RELA,SP1,STAT3,STAT6
RHOA		enzyme		0.429	0.000606	CDKN1A,ICAM1,RHOB,VCAM1	CEBPA,EGF,EGR1,EPAS1,FOXO1,JUN,MYC,NFKB1,NFkB (complex),NR3C1,NfkB1-RelA,P38 MAPK,PI3K (complex),PPARA,PPARG,RELA,RHOA,Rock,SMAD1,YAP1,ZFP36
CARM1		transcription regulator			0.00062	C3,CDKN1A,ICAM1	CARM1,JUN,NFKB1,NFKBIA,NFkB (complex),RELA,STAT5A
NSUN6		enzyme			0.00062	FLNA,LHFPL6,TGFB2
R5020		chemical reagent			0.000632	BIRC3,CDKN1A,HNRNPAB,NFKBIA	NFkB (complex),NR3C1,PGR,PTK2,R5020,RELB,RNA polymerase II
C7		other			0.000639	ICAM1,VCAM1
C8		complex			0.000639	ICAM1,VCAM1
DEK		transcription regulator			0.000639	BIRC3,NFKBIA
FBXO42		other			0.000639	ICAM1,VCAM1
Ferritin		complex			0.000639	ICAM1,NFKBIA
I-BOP		chemical reagent			0.000639	ICAM1,VCAM1	CEBPD,EGR1,ERK1/2,EZH2,FOXO1,I-BOP,JUN,MRTFA,MRTFB,MYC,NFkB (complex),P38 MAPK,PPARG,RELA,SMAD7,TBXA2R,WWTR1,YAP1,ZFP36
ING4		transcription regulator			0.000639	CDKN1A,NFKBIA
hexamethoxyflavone		chemical toxicant			0.000639	ICAM1,VCAM1	FOXO1,FOXO3,NFKB1,NFkB (complex),RELA,hexamethoxyflavone,palmitic acid
raltitrexed		chemical drug			0.000639	ANXA2,CDKN1A
butyric acid		chemical - endogenous mammalian		0.075	0.000647	ADGRE5,ANXA2,CCL20,CDKN1A,ICAM1,NFKB2,NFKBIA,ZFP36L1	EPAS1,FOXO3,HDAC3,IL6,JUN,NFKB1,NFKBIA,NFkB (complex),NOTCH1,NR3C1,RB1,REL,RELA,RELB,TP53,Z-LLL-CHO,butyric acid
pirinixic acid		chemical toxicant		1.682	0.000657	ANXA2,C3,CDKN1A,DYNLL1,FKBP1A,GADD45B,NFKBIA,VCAM1	FOXO1,FOXO3,IL1B,IL6,JUN,NFKB1,NFKBIA,NFkB (complex),PPARA,PPARG,RELA,oleic acid,palmitic acid,pirinixic acid
TNFRSF1A		transmembrane receptor	Activated	2.203	0.000663	BIRC3,CCL20,CDKN1A,ICAM1,VCAM1	CEBPD,ERK1/2,FOXO1,IKBKB,IRF1,JUN,NFKB1,NFKB2,NFKBIA,NFkB (complex),PRKCD,RELA,RELB,TNFAIP3,TNFRSF1A
ABL1		kinase			0.000668	C3,CDKN1A,TGFB2	ABL1,TP73
Z-LLL-CHO		chemical - protease inhibitor		-0.108	0.000669	BIRC3,CDKN1A,CLDN4,ICAM1,NFKB2,NFKBIA,VCAM1	26s Proteasome,EPAS1,GATA3,JUN,MYC,NFKB1,NFKBIA,NFkB (complex),NOTCH1,NR3C1,REL,RELA,RELB,RNA polymerase II,STAT3,STAT5A,TP53,YAP1,Z-LLL-CHO
AG490		chemical - kinase inhibitor		-1.881	0.000685	BIRC3,CDKN1A,ICAM1,S100A10	AG490,CEBPD,EPAS1,ERK1/2,FOS,FOXO1,ID2,JAK1,JUN,NFKB1,NFkB (complex),NR3C1,PI3K (complex),RELA,STAT1,STAT3,STAT5A,STAT5B
bortezomib		chemical drug		-0.029	0.000692	BIRC3,CDKN1A,GADD45B,HTRA2,ICAM1,VCAM1	26s Proteasome,CEBPD,ERK1/2,FOXO1,GATA3,HMGB1,IKK (complex),JUN,NFKB1,NFKBIA,NFKBIB,NFKBIE,NFkB (complex),PARP1,REL,RELA,STAT3,STAT5A,bortezomib
desmopressin		biologic drug			0.000714	FLNA,LMNA,ST14,YWHAH
NORAD		other			0.000718	GADD45B,RHOB,TNFRSF12A
pentoxifylline		chemical drug			0.000718	ICAM1,NFKBIA,VCAM1	FOS,FOXO3,HDAC3,IL1B,IL6,JUN,NFKB1,NFKBIA,NFkB (complex),NR3C1,RELA,RELB,STAT5A,pentoxifylline
Lh		complex			0.000737	CASP4,PPP2R1A,PTP4A1,RHOB,TGFB2,TNFRSF12A
NLRP3		other			0.000743	CCL20,NFKB2,NFKBIE,RELB	ESR1,IL33,JUN,NFKB1,NFKBIA,NFkB (complex),NLRP3,RELA,RELB,STAT5A,TNF
thioacetamide		chemical toxicant	Activated	2.213	0.000768	ANXA2,BIRC3,CLDN4,FXYD6,S100A10,TNFRSF12A	FOXO3,JUN,MYC,SMAD3,SMAD4,TGFB1,thioacetamide
SP1		transcription regulator		1.963	0.00077	CCL20,CDKN1A,FLNA,ICAM1,IFNGR1,LTB,NFKBIA,RRAS,TGFB2	ESR1,FOXO3,HDAC3,NFKB1,NFKBIA,NFkB (complex),RB1,RELA,SMAD1,SMAD2,SMAD3,SMAD4,SMAD7,SP1,TP53,estrogen receptor,hyaluronic acid
fasudil		chemical drug			0.000771	ICAM1,TGFB2,VCAM1	MYC,NFkB (complex),Nfat (family),RELA,Rock,Sod,YAP1,fasudil
COP1		enzyme			0.000797	CDKN1A,ICAM1	COP1,ERK,ETV5
IC87114		chemical - kinase inhibitor			0.000797	ICAM1,VCAM1
Igkv1-117		other			0.000797	CDKN1A,RELB	Igkv1-117,NFKB1,NFkB (complex),REL
N4BP1		other			0.000797	NFKB2,RELB
NFKBIE	0.056	transcription regulator			0.000797	ICAM1,VCAM1
SU1498		chemical - kinase inhibitor			0.000797	ICAM1,VCAM1	CEBPD,ERK1/2,FOXO1,JUN,NFkB (complex),RELA,SU1498
perilla alcohol		chemical drug			0.000797	CDKN1A,NFKBIA
polymyxin B		biologic drug			0.000797	APOBEC3B,VCAM1
MRTFB		transcription regulator	Activated	2.216	0.000802	ANKRD1,F11R,FLNA,LMNA,TGFB2	EZH2,MRTFA,MRTFB,SMAD7,WWTR1,YAP1
IRAK1		kinase			0.000826	CXCL16,RELB,VCAM1	IRAK1,JUN,NFKB1,NFKBIA,NFkB (complex),RELA,TRAF6
S100A4		other			0.000826	CDKN1A,CLIC4,VCAM1	FOXO1,GATA3,HMGB1,NFKB1,NFKB2,NFKBIA,NFkB (complex),Nfat (family),PARP1,PPARA,PPARG,PRKCA,RB1,RELA,RELB,RHOA,S100A4,SMAD1,STAT3,YAP1
verapamil		chemical drug			0.000826	ANXA2,S100A10,VCAM1
Ifn gamma		complex		1.199	0.000867	CDKN1A,CXCL16,ICAM1,TGFB2	ESR1,FOS,FOXO3,IFNG,Ifn gamma,JAK2,JUN,NFKB1,NFkB (complex),RELA,STAT3,TNF
advanced glycation end-products		chemical - endogenous mammalian			0.000884	CDKN1A,DDAH2,VCAM1	AGER,NFKB1,NFKB2,NFkB (complex),RELA,advanced glycation end-products
curcumin		chemical drug		-1.459	0.000933	BIRC3,CDKN1A,CLDN4,CTNNA1,ICAM1,NFKBIA,VCAM1	EPAS1,IKK (complex),IL1A,JUN,NFKB1,NFKB2,NFKBIA,NFKBIB,NFKBIE,NFkB (complex),NR3C1,PI3K (complex),PRKCD,PRKCE,RELA,curcumin
uric acid		chemical - endogenous mammalian	Inhibited	-2	0.000934	ICAM1,NFKB2,NFKBIE,RELB	HDAC3,IL33,JUN,NFKB1,NFKBIA,NFkB (complex),NLRP3,REL,RELA,STAT5A,TLR4,uric acid
TLR3		transmembrane receptor	Activated	2.224	0.000939	C3,CCL20,GADD45B,ICAM1,RHOB,SERPINB9	ESR1,FOS,FOXO3,HDAC3,IL12 (complex),IL1B,IL6,JUN,NFKB1,NFKBIA,NFkB (complex),NR3C1,RELA,STAT3,STAT6,TLR3,TNF
Ro31-8220		chemical - kinase inhibitor			0.000944	CDKN1A,ICAM1,VCAM1	CEBPD,ERK1/2,FOXO1,IKK (complex),JUN,NFKB1,NFKBIA,NFKBIB,NFKBIE,NFkB (complex),Nfat (family),PPARA,PRKCA,PRKCE,RB1,RELA,Ro31-8220,TBXA2R,WWTR1,YAP1
THPO		cytokine			0.000969	BIRC3,ICAM1,NFKB2,NFKBIA	CSF2,EPAS1,JUN,NFKB1,NFKBIA,NFkB (complex),NOTCH1,NR3C1,PI3K (complex),REL,RELA,RELB,STAT3,STAT5A,THPO
ACVR2A		kinase			0.000971	ICAM1,VCAM1	ACVR1,ACVR2A,SMAD1
AFP		transporter			0.000971	PTP4A1,TNFRSF12A
CAMK2G		kinase			0.000971	BIRC3,CDKN1A	CAMK2G,EGR1,FOXO1,PPARG,RNA polymerase II,SIRT1
Kallikrein		group			0.000971	ICAM1,VCAM1	EGF,FOXO1,JUN,Kallikrein,MYC,PPARG,SMAD1
LIMS1		other			0.000971	CTNNA1,TGFB2
TRIM25		transcription regulator			0.000971	CDKN1A,SFN
CSF3		cytokine		-0.128	0.000987	BIRC3,GADD45B,ICAM1,LTB,VCAM1	CSF3,FOS,ID2,IL12 (complex),IL18,JUN,NFKB1,NFKB2,NFKBIA,NFkB (complex),NR3C1,RELA,STAT1,STAT3,STAT5A,STAT5B,STAT6,TNFRSF1A
F2R		g-protein coupled receptor		1.414	0.001	CASP4,ICAM1,TGFB2,VCAM1	EZH2,F2R,FOXO3,JUN,MRTFA,MRTFB,MYC,NFKB1,NFKBIA,NFkB (complex),NOTCH1,Nfat (family),RELA,RELB,SMAD3,SMAD4,SMAD7,TBXA2R,TGFB1,WWTR1,YAP1
Nfat (family)		group	Activated	2	0.001	ICAM1,RELB,TGFB2,VCAM1	NFKB1,NFKBIA,Nfat (family),cytokine
HOTAIR		other			0.00101	CDKN1A,ICAM1,NFKBIA	EZH2,GATA3,HOTAIR,MYC,NFKB1,NR3C1,PGR,RELB,RNA polymerase II
C3AR1		g-protein coupled receptor			0.00107	C3,CASP4,TGFB2	C3,C3AR1,JUN
S100A8		other		0.686	0.00109	BCL3,CCL20,ICAM1,NFKBIA,VCAM1	FOXO3,IL1B,IL6,JUN,NFKB1,NFKBIA,NFkB (complex),NOTCH1,RELA,RELB,S100A8,TLR4
calcitriol		chemical drug		1.891	0.00109	ANXA2,BCL3,C3,CCL20,CDKN1A,NFKBIA,PMEPA1,SERPINB9,TGFB2	ADIPOQ,AR,CEBPA,CEBPD,FOXO3,HDAC3,IL6,JUN,NCOR1,NFKB1,NFKBIA,NFkB (complex),REL,RELA,SMAD3,SMAD4,SMAD7,STAT3,calcitriol
RB1		transcription regulator			0.0011	CASP4,CDKN1A,CLIC4,IFNGR1,NFKB2,NFKBIA,PMEPA1,TGFB2	CASP3,CD44,E2F1,EGR1,ESR1,FOXO1,FOXO3,HDAC3,JUN,MYC,NFKB1,NFKBIA,NFkB (complex),NOTCH1,NR3C1,RB1,RELA,SMAD4,SP1,STAT1,STAT3,TP53
lysophosphatidylinositol		chemical - endogenous mammalian			0.00114	C3,ICAM1,LTB
zVAD-FMK		chemical - protease inhibitor			0.00114	BIRC3,CDKN1A,VCAM1	CEBPD,ERK1/2,FAS,FOXO1,IL1A,JUN,NFKB1,NFKB2,NFKBIA,NFkB (complex),PRKCD,PTK2,RELA,zVAD-FMK
vorinostat		chemical drug		-1.064	0.00116	BIRC3,CDKN1A,ICAM1,NFKBIA,OSBPL3,ST14	BCL2,FOXO1,FOXO3,HDAC3,IFI16,JUN,LY294002,NFKB1,NFKBIA,NFKBIB,NFkB (complex),RB1,RELA,SP1,TP53,TXN,Tnf (family),vorinostat
C9		other			0.00116	ICAM1,VCAM1
CDH5		other			0.00116	CDKN1A,ICAM1	CDH5,EGR1,EPAS1,FOXO1,JUN,NFKB1,NR3C1,PI3K (complex),PPARG,RELA,RNA polymerase II,SIRT1
DDB2		other			0.00116	CDKN1A,NFKBIA	DDB2,ESR1,HDAC3,RB1,SMAD4,SP1
GADD45G		other			0.00116	CDKN1A,TGFB2
NELFB		other			0.00116	CDKN1A,GADD45B
SLC9A1		ion channel			0.00116	ICAM1,VCAM1	EGR1,MYC,P38 MAPK,PPARG,SLC9A1,YAP1,ZFP36
SR 144528		chemical reagent			0.00116	ICAM1,NFKBIA
IL18		cytokine	Activated	2.188	0.00117	CCL20,CXCL16,GADD45B,ICAM1,VCAM1	ADIPOQ,FOS,FOXO3,IL18,IL6,JUN,JUND,NFKB1,NFKB2,NFKBIA,NFkB (complex),PRKCD,RELA,STAT3,TRAF6
BCL2		transporter		-0.341	0.0012	CDKN1A,ICAM1,NFKBIA,TGFB2	BCL2,ESR1,FOXO1,FOXO3,HDAC3,HRAS,NFKB1,NFKBIA,NFKBIB,NFkB (complex),NOTCH1,RB1,REL,RELA,SMAD3,SMAD4,SP1,TP53,paclitaxel
15-deoxy-delta-12,14 -PGJ 2		chemical - endogenous mammalian		-0.472	0.0012	BIRC3,CDKN1A,ICAM1,NFKBIA,VCAM1	15-deoxy-delta-12,14 -PGJ 2,CEBPD,EPAS1,ERK1/2,FOXO1,IKBKB,IRF1,JUN,NFKB1,NFKBIA,NFkB (complex),NOTCH1,NR3C1,PI3K (complex),RELA,RELB
BAPTA-AM		chemical reagent			0.00121	CDKN1A,ICAM1,VCAM1	BAPTA-AM,CEBPD,EGF,EGR1,EPAS1,ERK1/2,FOXO1,GATA3,HMGB1,JUN,MYC,NFKB1,NFkB (complex),NR3C1,P38 MAPK,PARP1,PI3K (complex),PPARG,RELA,SMAD1,STAT3,YAP1,ZFP36
TXN		enzyme			0.00121	CDKN1A,ICAM1,NFKBIA	EGFR,FOXO3,GATA3,HDAC3,HMGB1,JAK1,JAK2,NFKB1,NFKBIA,NFkB (complex),NOTCH1,PARP1,RELA,RELB,SP1,STAT3,STAT5A,TXN
pyrrolidine dithiocarbamate		chemical reagent		-1.227	0.00124	BIRC3,ICAM1,NFKBIA,VCAM1	CXCL8,IKBKG,JUN,NFKB1,NFKB2,NFKBIA,NFkB (complex),NOTCH1,PRKCD,RELA,RELB,pyrrolidine dithiocarbamate
forskolin		chemical toxicant		1.55	0.00126	BCL3,CASP4,CDKN1A,GADD45B,ICAM1,NFKBIA,PPP2R1A,PTP4A1,RHOB,S100A10	E2F1,EGR1,ESR1,FOS,FOXO1,FOXO3,HDAC3,IL1B,IL6,JUN,MYC,NFKB1,NFKBIA,NFkB (complex),NR3C1,RELA,TNF,forskolin
Akt		group		0.48	0.00127	ANKRD1,CDKN1A,GPM6B,LMNA,NFKBIA,RHOB,VCAM1	Akt,EGFR,EZH2,FOS,FOXO1,FOXO3,HDAC3,ID2,JUN,MRTFA,MRTFB,NFKB1,NFkB (complex),NR3C1,PPARG,RELA,RHOA,SMAD1,SMAD7,SP1,STAT5A,TNFSF11,WWTR1,YAP1
NR5A2		ligand-dependent nuclear receptor		-1.122	0.00128	C3,CDKN1A,CXCL16,ICAM1	C3,FOS,HDAC3,JUN,JUNB,JUND,NFkB (complex),NR3C1,NR5A2,RELA
berberine		chemical drug		-0.343	0.00128	BIRC3,CDKN1A,ICAM1,VCAM1	CEBPD,EGR1,ERK1/2,FOXO1,HMGB1,IKK (complex),JUN,NFKB1,NFKBIA,NFKBIB,NFKBIE,NFkB (complex),PPARG,RELA,RELB,RNA polymerase II,SIRT1,STAT3,berberine
puromycin aminonucleoside		chemical reagent	Activated	2	0.00128	ANXA2,CLDN4,S100A10,TNFRSF12A
Hsp70		group			0.00128	ICAM1,NFKBIA,VCAM1	CD40,CXCL8,E2F1,EGR1,FOXO1,FOXO3,Hsp70,JUN,MYC,MYD88,NFKB1,NFKB2,NFKBIA,NFkB (complex),RELA,STAT3,TLR4
IRF4		transcription regulator		-1.109	0.00129	BIRC3,CCL20,RHOB,YWHAH,ZFP36L1
H2AB3 (includes others)		other			0.00136	CDKN1A,CHAC1,SERPINB9
PRL		cytokine		0.268	0.00137	ANXA2,BOK,CCL20,CDKN1A,PDLIM4,SAMD9L	ERBB2,JUN,NFKB1,PRL,RELA,STAT3,TP53
1-chloro-2-(2,2,2-trichloro-1-(4-chlorophenyl)ethyl)benzene		chemical toxicant			0.00137	CDKN1A,GADD45B	1-chloro-2-(2,2,2-trichloro-1-(4-chlorophenyl)ethyl)benzene,ESR1,ESR2,JUN,NFkB (complex),NR5A2
N,N-dimethylsphingosine		chemical reagent			0.00137	ICAM1,VCAM1	CEBPD,EGR1,EPAS1,ERK1/2,FOXO1,JUN,LDL,MYC,N,N-dimethylsphingosine,NFKB1,NFKBIA,NFkB (complex),NR3C1,P38 MAPK,PI3K (complex),PPARG,RELA,SMAD1,STAT1,YAP1,ZFP36,sphingosine-1-phosphate
SAMHD1		enzyme			0.00137	NFKB2,NFKBIA
UGCG		enzyme			0.00137	CDKN1A,ICAM1
trypsin		group			0.00137	CDKN1A,ICAM1	EGR1,FOXO1,FOXO3,JUN,MYC,NFKB1,NFKBIA,NFkB (complex),NOTCH1,P38 MAPK,PPARG,RELA,RHOA,SMAD1,STAT3,TP53,YAP1,YY1,ZFP36,prostaglandin E2,resveratrol,trypsin
bisindolylmaleimide I		chemical - kinase inhibitor		-1.983	0.00137	BIRC3,CDKN1A,ICAM1,NFKBIA	IKBKB,IRF1,JUN,MAP2K1,NCOA3,NFKB1,NFKB2,NFKBIA,NFkB (complex),NOTCH1,Nfat (family),PPARA,PRKCA,PRKCD,RB1,RELA,RELB,SP1,bisindolylmaleimide I
troglitazone		chemical drug		-1.026	0.00137	ANXA2,BIRC3,C3,CDKN1A,ICAM1,NFKBIA,VCAM1	CEBPD,EPAS1,ERK1/2,FOXO1,FOXO3,JUN,NFKB1,NFKB2,NFKBIA,NFkB (complex),NR3C1,PI3K (complex),PRKCD,RELA,RELB,palmitic acid,troglitazone
E2F1		transcription regulator		-0.1	0.0014	BOK,CDKN1A,DDAH2,ICAM1,NFKBIA,TAPBP,TP53INP1,VCAM1	CEBPD,E2F1,EPAS1,ERK1/2,ESR1,FOXO1,IL1A,JUN,NFKB1,NFKBIA,NFkB (complex),RELA,RELB,RNA polymerase II,SIRT1
GNA15		enzyme			0.00142	C3,CASP4,CCL20,ZFP36L1
inosine		chemical - endogenous mammalian			0.00144	ANXA2,C3,PPP1R14B
MAP2K1		kinase			0.00148	ANKRD1,BIRC3,CDKN1A,FLNA,NFKBIA	AKT1,AR,ATF4,ESR1,FN1,IKBKB,IRF1,MAP2K1,NCOA3,NFKB1,NFKBIA,NFkB (complex),NOTCH1,RELA,RELB,TP53,YAP1
ERBB3		kinase		-1	0.00151	CD47,CDKN1A,LHFPL6,RRAS	EGFR,ERBB3,FOXO3,HDAC3,SP1,STAT5A
Rock		group			0.00152	CDKN1A,ICAM1,VCAM1	CEBPD,EGR1,ERK1/2,EZH2,FOXO1,FOXO3,IL6,JUN,MRTFA,MRTFB,MYC,NFKB1,NFKBIA,NFkB (complex),P38 MAPK,PPARG,RELA,RHOA,Rock,SMAD1,SMAD7,WWTR1,YAP1,ZFP36
DUSP1		phosphatase		-1	0.00156	CCL20,ICAM1,TGFB2,VCAM1	CEBPD,DUSP1,ERK1/2,FOS,FOXO1,FOXO3,IFNG,IL10,IL6,JUN,NFKB1,NFKB2,NFKBIA,NFkB (complex),RELA,STAT3,cytokine
CDKN2B-AS1		other			0.00159	ICAM1,VCAM1
F10		peptidase			0.00159	ICAM1,VCAM1	CEBPD,EGR1,ERK1/2,F10,F2R,FOS,FOXO1,JUN,MYC,NFKB1,NFKBIA,NFkB (complex),Nfat (family),PPARA,PPARG,PRKCA,RB1,RELA,RHOA,SMAD1,VEGFA,VHL,YAP1
HOXA4		transcription regulator			0.00159	ANKRD1,TGFB2	EZH2,HOXA4,MRTFA,MRTFB,SMAD7,WWTR1,YAP1
NAE1		enzyme			0.00159	CDKN1A,SFN
PSMB10		peptidase			0.00159	NFKB2,NFKBIA
anti-benzo(a)pyrene-diol-epoxide		chemical toxicant			0.00159	CDKN1A,GADD45B	E2F1,EGR1,FOXO1,FOXO3,MYC,NFkB (complex),anti-benzo(a)pyrene-diol-epoxide
noscapine		chemical drug			0.00159	BIRC3,ICAM1
L-methionine		chemical - endogenous mammalian			0.00161	GADD45B,NFKBIA,RHOB	L-methionine,MYC
platelet activating factor		chemical - endogenous mammalian			0.00161	CDKN1A,ICAM1,NFKBIA	EGFR,EPAS1,FOXO3,HDAC3,IL6,JUN,NFKB1,NFKBIA,NFkB (complex),NOTCH1,NR3C1,Nfat (family),PI3K (complex),PPARA,PRKCA,RB1,RELA,RELB,SP1,STAT5A,platelet activating factor
diphtheria toxin		chemical - endogenous non-mammalian			0.00161	BCL3,Gm12854/S100a11,RELB,S100A10
TREM1		transmembrane receptor	Activated	2.236	0.00162	CCL20,GADD45B,HECW2,NFKB2,NFKBIA	IL1B,JUN,NFKB1,NFKBIA,NFkB (complex),RELA,TREM1
CD5		transmembrane receptor			0.00169	BCL3,ICAM1,RELB	CD5,JUN,NFKB1,NFKBIA,NFkB (complex),RELA,STAT5A
DCN		other			0.00169	CDKN1A,ICAM1,VCAM1	CEBPD,DCN,EGR1,ERK1/2,FOXO1,FOXO3,IL1B,IL6,JUN,MYC,NFKB1,NFKBIA,NFkB (complex),RELA,VEGFA,VHL
WWTR1		transcription regulator			0.00169	CDKN1A,ICAM1,VCAM1
carboplatin		chemical drug			0.00169	CD47,CLDN4,TNFRSF12A
enalapril		biologic drug			0.00169	CLDN4,TNFRSF12A,VCAM1
oleic acid		chemical - endogenous mammalian		-1.565	0.00171	GADD45B,ICAM1,NFKBIA,VCAM1	ESR1,FOXO1,FOXO3,IL1B,IL6,JUN,NFKB1,NFKBIA,NFkB (complex),RELA,STAT5A,TNF,oleic acid,palmitic acid
CXCL12		cytokine	Activated	2.19	0.00173	BCL3,CD47,FLNA,ICAM1,RRAS	CXCL12,EGFR,FOXO3,HDAC3,JAK1,NFkB (complex),SP1,STAT3,STAT5A
ethanol		chemical - endogenous mammalian		1.577	0.00175	CDKN1A,CLIC4,ICAM1,RHOB,TGFB2,TP53INP1,VCAM1	EGR1,ESR1,FOXO1,HMGB1,HMOX1,JUN,MYC,NFKB1,NFKBIA,NFkB (complex),Nfat (family),P38 MAPK,PPARA,PPARG,PRKCA,RB1,RELA,RHOA,SMAD1,SP1,TNF,YAP1,ZFP36,ethanol
AKT1		kinase		1.172	0.00181	ANKRD1,BIRC3,CDKN1A,NFKB2,RHOB,TGFB2	AKT1,AR,CD44,FOXO1,FOXO3,HDAC3,MAP2K1,NCOA3,NFKB1,NFKBIA,NFkB (complex),NOTCH1,NR3C1,RB1,REL,RELA,SMAD3,SP1,TP53
1'-acetoxychavicol acetate		chemical reagent			0.00183	BIRC3,ICAM1	1'-acetoxychavicol acetate,CEBPD,ERK1/2,FOXO1,IKK (complex),JUN,NFKB1,NFKBIB,NFKBIE,NFkB (complex),RELA
N-ethyl-N-nitrosourea		chemical toxicant			0.00183	CDKN1A,ICAM1
TIFA		other			0.00183	ICAM1,NFKBIA	CXCL8,IKBKG,JUN,NFKB1,NFKBIA,NFkB (complex),RELA,TIFA
amlodipine		chemical drug			0.00183	ANXA2,S100A10
ginkgolide B		chemical drug			0.00183	HTRA2,ICAM1
wortmannin		chemical - kinase inhibitor		-0.714	0.00185	CDKN1A,CXCL16,ICAM1,NFKBIA,VCAM1	CXCL8,E2F1,IKBKB,IRF1,JUN,MAPKAPK2,NFKB1,NFKB2,NFKBIA,NFKBIB,NFkB (complex),Nfat (family),PPARA,PRKCA,PRKCD,RB1,RELA,ZFP36,wortmannin
ESR2		ligand-dependent nuclear receptor		1.135	0.00186	C3,CDKN1A,CLDN4,CXCL16,GADD45B,LMNA,NFKB2,NFKBIA	4-hydroxytamoxifen,ESR1,ESR2,FOS,FOXO1,FOXO3,HDAC3,JUN,JUND,NFKB1,NFkB (complex),NR3C1,NR5A2,RELA,SMARCA4,TNF,beta-estradiol,estrogen receptor
MAP2K7		kinase			0.00188	BIRC3,CDKN1A,RHOB	FADD,FOS,HDAC3,JUN,MAP2K7,NFKB1,NFkB (complex),NR3C1,RELA,TAB1
MAPKAPK2		kinase			0.00188	ICAM1,NFKBIA,VCAM1	E2F1,FOXO3,IL6,JUN,MAPKAPK2,NFKB1,NFKBIA,NFKBIB,NFkB (complex),REL,RELA,RELB,RNA polymerase II,SIRT1,ZFP36
hexachlorobenzene		chemical toxicant			0.00188	ANXA2,S100A10,TNFRSF12A
ELAVL1		other			0.00189	CDKN1A,FLNA,NFKBIA,TP53INP1,VCAM1	CCND1,EGR1,ELAVL1,MYC,P38 MAPK,PPARG,YAP1,ZFP36
TP73		transcription regulator		0.317	0.0019	C3,CASP4,CDKN1A,Serpinb6b,SFN,TGFB2,TNFRSF12A	CASP3,FOXO3,RB1,STAT1,STAT3,TP73
PARP1		enzyme			0.00193	CASP4,CDKN1A,ICAM1,VCAM1	EGR1,GATA3,HMGB1,IL1B,JUN,MYC,NFKB1,NFKBIA,NFkB (complex),NOTCH1,P38 MAPK,PARP1,PPARG,RELA,RELB,STAT3,YAP1,ZFP36
SB-431542		chemical reagent	Inhibited	-2	0.00193	CLIC4,GADD45B,TGFB2,TNFRSF12A
MAP2K4		kinase			0.00197	BIRC3,CDKN1A,FLNA	JUN,MAP2K4,MAP2K7
PTK2		kinase			0.00197	BIRC3,CDKN1A,VCAM1	CEBPD,EPAS1,ERK1/2,FOXO1,IKK (complex),JUN,NFKB1,NFKBIA,NFKBIB,NFKBIE,NFkB (complex),NR3C1,PI3K (complex),PPARG,PTK2,RELA,RHOA,SMAD1,STAT5A,YAP1
benzene		chemical toxicant			0.00197	CD47,CDKN1A,RHOB
interferon beta-1a		biologic drug			0.00199	FKBP1A,GADD45B,LTB,NFKBIA
PRKCB		kinase			0.00207	CDKN1A,ICAM1,RELB	CHUK,FOXO3,GATA3,HMGB1,IKBKB,IRF1,JUN,NFKB1,NFKB2,NFKBIA,NFkB (complex),PARP1,PRKCB,PRKCD,RELA,RELB,STAT3
10-nitrooleate		chemical - endogenous mammalian			0.00209	ICAM1,VCAM1
3-aminobenzamide		chemical toxicant			0.00209	CDKN1A,ICAM1	3-aminobenzamide,EPAS1,ESR1,GATA3,HMGB1,NFKB1,NFkB (complex),PARP1,RELA,SIRT1,STAT3
C1q		complex			0.00209	ICAM1,VCAM1	C1q,CEBPD,CXCL8,EGR1,ERK1/2,FOXO1,IL10,JUN,MYC,NFKB1,NFKB2,NFkB (complex),P38 MAPK,PPARG,RELA,STAT3,YAP1,ZFP36
EPHX2		enzyme			0.00209	ICAM1,VCAM1	CEBPA,EGR1,EPHX2,FOXO1,HMGB1,HMOX1,JUN,MYC,NfkB1-RelA,P38 MAPK,PPARA,PPARG,SP1,YAP1,ZFP36
PFKFB3		kinase			0.00209	ICAM1,VCAM1	EGR1,FGF2,FOXO1,JUN,MYC,PFKFB3,SP1
S1PR3		g-protein coupled receptor			0.00209	ICAM1,VCAM1	CXCL8,EGR1,EPAS1,JUN,MYC,NFKB1,NFkB (complex),NR3C1,P38 MAPK,PI3K (complex),PPARG,RELA,S1PR3,YAP1,ZFP36
epothilone B		chemical drug			0.00209	CDKN1A,SFN
farnesyl pyrophosphate		chemical - endogenous mammalian			0.00209	ICAM1,VCAM1	CEBPA,CEBPD,EGR1,ERK1/2,FOXO1,JUN,MYC,NFkB (complex),NfkB1-RelA,P38 MAPK,PPARA,PPARG,RELA,YAP1,ZFP36,farnesyl pyrophosphate
CD44		other		1.154	0.0021	BIRC3,CDKN1A,NFKB2,PMEPA1,VCAM1	AKT1,AR,CD44,EPAS1,JUN,NFKB1,NFKBIA,NFkB (complex),NOTCH1,NR3C1,PI3K (complex),PRKCE,PTK2,RELA,RELB,TP53
celecoxib		chemical drug		0.364	0.00211	CDKN1A,CLDN4,ICAM1,VCAM1	15-deoxy-delta-12,14 -PGJ 2,E2F1,ERK,ETV5,FOXO3,GATA3,HDAC3,HMGB1,JUN,NFKB1,NFkB (complex),NR3C1,PARP1,RELA,STAT3,YAP1,aspirin,celecoxib,cisplatin
mir-155		microrna		-1.98	0.00211	ANXA2,CD47,CDKN1A,TP53INP1
HMOX1		enzyme		-1.195	0.00217	CDKN1A,ICAM1,TGFB2,VCAM1	CEBPD,CXCL8,EGR1,ERK1/2,ESR1,FOXO1,HDAC3,HMGB1,HMOX1,JUN,MYC,NFKB1,NFKBIA,NFkB (complex),P38 MAPK,PPARG,RB1,RELA,SMAD4,SP1,STAT3,YAP1,ZFP36
IL11		cytokine			0.00217	ANXA2,ICAM1,VCAM1	CXCL8,EGR1,FOXO1,IL11,MYC,NFKB1,NFkB (complex),REL,RELA,VEGFA,VHL,ZFP36
U0126		chemical - kinase inhibitor	Inhibited	-2.34	0.00219	BIRC3,C3,CDKN1A,CLDN4,GADD45B,ICAM1,TGFB2,VCAM1	CEBPD,EGR1,ERK1/2,ESR1,ESR2,FOXO1,JUN,NFKB1,NFkB (complex),PGR,RELA,SMAD1,TNF,U0126,estrogen receptor,progesterone
TNFRSF8		transmembrane receptor			0.00228	CDKN1A,NFKB2,RELB	JUN,NFKB1,NFKB2,NFKBIA,NFkB (complex),RELA,RELB,STAT5A,TNFRSF8
ANGPT2		growth factor		1.455	0.00232	CDKN1A,ICAM1,RHOB,TNFRSF12A,VCAM1	ANGPT2,CEBPA,EGR1,EPAS1,FOXO1,FOXO3,IL6,JUN,MYC,NFKB1,NFKBIA,NFkB (complex),NR3C1,NfkB1-RelA,P38 MAPK,PI3K (complex),PPARA,PPARG,PTGS2,RELA,YAP1,ZFP36
EGF		growth factor	Activated	2.103	0.00234	ARF6,CCL20,CDKN1A,ICAM1,RHOB,S100A10,TNFRSF12A,VCAM1	EGF,EGR1,FOXO1,HMGB1,IL1,JUN,MYC,NFKB1,NFKBIA,NFkB (complex),P38 MAPK,PPARG,RELA,RHOA,Rock,SMAD1,STAT1,STAT3,STAT5A,TGFA,YAP1,ZFP36
CHD1		enzyme			0.00236	CCL20,ICAM1
DDR1		kinase			0.00236	CDKN1A,VCAM1
KLK5		peptidase			0.00236	CCL20,ICAM1
PSMB8		peptidase			0.00236	NFKB2,NFKBIA
Sod		group			0.00236	ICAM1,VCAM1	EGR1,FOS,HMGB1,HMOX1,IL18,JUN,MYC,NFKBIA,NFkB (complex),Nfat (family),P38 MAPK,PPARG,S-nitrosoglutathione,SP1,Sod,YAP1,ZFP36
TNFRSF6B		transmembrane receptor			0.00236	ICAM1,VCAM1	CXCL8,EGR1,IKK (complex),JUN,MYC,NFKB1,NFKBIA,NFKBIB,NFKBIE,NFkB (complex),P38 MAPK,PPARG,RELA,TNFRSF6B,TNFSF14,Tnf (family),YAP1,ZFP36
doxifluridine		chemical drug			0.00236	CDKN1A,TP53INP1
leukotriene C4		chemical - endogenous mammalian			0.00236	ICAM1,VCAM1	IL13,JUN,NFkB (complex),RELA,leukotriene C4
LDLR		transporter			0.00237	CD47,CDKN1A,ICAM1,Serpinb6b,VCAM1	E2F1,EGR1,LDL,LDLR,MAPKAPK2,MYC,NFKBIA,NFKBIB,NFkB (complex),Nfat (family),P38 MAPK,PPARG,RELA,STAT1,Sod,YAP1,ZFP36
TLR7		transmembrane receptor		1.96	0.00242	CCL20,CDKN1A,ICAM1,MLPH,NFKBIA	CEBPD,ERK1/2,FOS,FOXO1,FOXO3,IL1B,IL6,JUN,NFKB1,NFKBIA,NFkB (complex),RELA,RELB,STAT1,STAT3,TLR7
ETV6-RUNX1		fusion gene/product		-1.984	0.00242	BCL3,ICAM1,LTB,RELB,RRAS,STX11
BCL3	0.057	transcription regulator			0.0025	CCL20,ICAM1,NFKBIA	BCL3,CXCL8,FOXO3,IL1B,IL6,JUN,NFKB1,NFKBIA,NFkB (complex),NOTCH1,RELA,RELB
HOXD10		transcription regulator			0.0025	Gm12854/S100a11,ICAM1,RHOB
OSMR		transmembrane receptor			0.0025	BCL3,BIRC3,CASP4
sunitinib		chemical drug			0.0025	CDKN1A,CTNNA1,ICAM1	ERK,ETV5,FOXO3,JAK2,sunitinib
Sb202190		chemical - kinase inhibitor		-1.698	0.00257	CDKN1A,ICAM1,RHOB,VCAM1	AR,Akt,CEBPA,EGR1,FOXO1,IL1B,JUN,MYC,NFKB1,NFKBIA,NFkB (complex),NfkB1-RelA,P38 MAPK,PPARA,PPARG,RELA,Sb202190,VEGFA,VHL,YAP1,ZFP36
Sn50 peptide		chemical toxicant			0.00261	BIRC3,ICAM1,VCAM1	CXCL8,FOXO1,FOXO3,JUN,NFKB1,NFKBIA,NFkB (complex),NOTCH1,RELA,RELB,STAT5A,Sn50 peptide,palmitic acid
BARX2		transcription regulator			0.00265	DYNLL1,FLNA
S1PR2		g-protein coupled receptor			0.00265	ICAM1,VCAM1	CEBPD,CXCL8,EGR1,EPAS1,ERK1/2,FOXO1,JUN,MYC,NFKB1,NFkB (complex),NR3C1,P38 MAPK,PI3K (complex),PPARG,RELA,RHOA,S1PR2,SMAD1,YAP1,ZFP36
VGLL3		other			0.00265	ANKRD1,GADD45B
XPO1		transporter			0.00265	CDKN1A,ICAM1
12-(3-adamantan-1-yl-ureido) dodecanoic acid		chemical reagent			0.00273	BIRC3,BOK,CASP4
Go 6976		chemical - kinase inhibitor			0.00273	CDKN1A,NFKBIA,VCAM1	AR,Akt,EPAS1,FOXO3,Go 6976,IKBKB,IL6,IRF1,JUN,NFKB1,NFKBIA,NFkB (complex),NR3C1,Nfat (family),PI3K (complex),PPARA,PRKCA,RB1,RELA,YAP1
ursodeoxycholic acid		chemical - endogenous mammalian			0.00273	CCL20,NFKB2,TGFB2
sirolimus		chemical drug		-1.79	0.00274	BCL3,CDKN1A,ICAM1,LMNA,PTP4A1,SFN,TP53INP1,VCAM1	ACVR1,E2F1,EGR1,FOXO1,FOXO3,MYC,NFKB1,NFkB (complex),PPARG,RHOA,RNA polymerase II,SIRT1,SMAD1,VEGFA,VHL,YAP1,sirolimus
mifepristone		chemical drug		0.471	0.00278	C3,CDKN1A,CTNNA1,ICAM1,NFKBIA,RHOB	AGT,CSF2,EPAS1,ESR1,ESR2,FOS,FOXO1,FOXO3,HDAC3,JUN,NFKB1,NFKBIA,NFkB (complex),NR3C1,PGR,PI3K (complex),PPARG,RELA,RELB,STAT3,estrogen receptor,mifepristone,progesterone
MBD2		transcription regulator			0.00285	BIRC3,CDKN1A,RELB
infliximab		biologic drug			0.00285	CCL20,NFKB2,NFKBIA
NUMB		other			0.00295	BIRC3,CDKN1A	NFKB1,NFkB (complex),NOTCH1,NUMB,RELA,TP53,YY1
PS-1145		chemical - kinase inhibitor			0.00295	ICAM1,NFKBIA
SLC29A1		transporter			0.00295	CDKN1A,TP53INP1	CEBPA,EGR1,FOXO1,HMGB1,SLC29A1,ethanol
TNFRSF13C		transmembrane receptor			0.00295	NFKB2,RELB	JUN,MAP3K14,NFKB1,NFKBIA,NFkB (complex),REL,RELA,RELB,TNFRSF13C,TNFSF13B,TRAF3
diethylmaleate		chemical toxicant			0.00295	CDKN1A,NFKBIA
helenalin		chemical - endogenous non-mammalian			0.00295	CCL20,NFKBIA	JUN,NFKB1,NFKBIA,NFkB (complex),RELA,TLR4,helenalin
idarubicin		chemical drug			0.00295	CDKN1A,TP53INP1
magnesium		chemical - endogenous mammalian			0.00295	CDKN1A,PTP4A1
FOXA2		transcription regulator		0	0.0031	C3,CLDN4,EFHD2,NFKB2,NFKBIE
3,3'-diindolylmethane		chemical drug			0.00311	CDKN1A,IFNGR1,NFKBIA
F3		transmembrane receptor			0.00311	ICAM1,PAK3,VCAM1	CXCL8,F2R,F3,FOS,NFKB1,NFKBIA,NFkB (complex),Nfat (family),PPARA,PRKCA,RB1,RELA,YAP1
Igm		complex			0.00311	CDKN1A,NFKB2,ZFP36L1	CD40LG,ERK,ETV5,Igm,LYN,NFKB1,NFKB2,NFkB (complex),RELA,RELB,STAT3
Ngf		group			0.00311	ANXA2,CDKN1A,TGFB2
Pro-inflammatory Cytokine		group			0.00311	CD47,ICAM1,VCAM1	E2F1,EGR1,FOXO1,MAPKAPK2,MYC,NFKBIB,NFkB (complex),Pro-inflammatory Cytokine,RELA,VEGFA,VHL,ZFP36
TNFSF13B		cytokine			0.00311	ICAM1,NFKB2,RELB	CHUK,FOXO3,IKBKG,JUN,NFKB1,NFKB2,NFKBIA,NFkB (complex),PRKCD,REL,RELA,RELB,TNFSF13B,TRAF3
palmitic acid		chemical - endogenous mammalian			0.00316	BIRC3,CDKN1A,ICAM1,NFKBIA,VCAM1	EPAS1,IKBKB,IL1A,IRF1,JUN,NFKB1,NFKB2,NFKBIA,NFkB (complex),NR3C1,Nfat (family),PI3K (complex),PPARA,PRKCA,PRKCD,RB1,RELA,palmitic acid
EPAS1		transcription regulator		0.927	0.00322	BIRC3,CDKN1A,GADD45B,ICAM1,VCAM1	CEBPD,EPAS1,ERK1/2,EZH2,FOXO1,JUN,MRTFA,MRTFB,MYC,NFkB (complex),RELA,RNA polymerase II,SMAD1,SMAD7,WWTR1,YAP1,sphingosine-1-phosphate
SPDEF		transcription regulator			0.00324	BIRC3,CDKN1A,LASP1
LY6E		other			0.00327	NFKBIA,RELB
S1PR1		g-protein coupled receptor			0.00327	ICAM1,VCAM1	CEBPD,CXCL8,EGR1,ERK1/2,FOXO1,GATA3,JUN,MYC,NFKB1,NFkB (complex),P38 MAPK,PPARG,RELA,S1PR1,WWTR1,YAP1,ZFP36,lysophosphatidic acid
TIMP2		other			0.00327	CDKN1A,NFKBIA	AR,Akt,JUN,NFKB1,TIMP2,YAP1
TP53COR1		other			0.00327	BIRC3,TP53INP1
elovanoid N32		chemical - endogenous mammalian			0.00327	CDKN1A,ICAM1
sulfasalazine		chemical drug			0.00327	ICAM1,NFKBIA	ADIPOQ,CXCL8,NFKB1,NFKBIA,NFkB (complex),RELA,STAT3,sulfasalazine
JAK1		kinase			0.00337	BCL3,CDKN1A,ICAM1	FOS,FOXO3,IL10,IL6,JAK1,JAK2,JUN,NFKB1,NFKB2,NFKBIA,NFkB (complex),RELA,STAT1,STAT3,STAT5A
RIPK2		kinase			0.00337	ICAM1,NFKB2,VCAM1	CXCL8,IKK (complex),Ige,JUN,NFKB1,NFKBIA,NFKBIB,NFKBIE,NFkB (complex),NOD2,RELA,RELB,RIPK2
sulforafan		chemical drug		0.147	0.00342	CDKN1A,ICAM1,NFKBIA,VCAM1	CHUK,EGR1,FOXO3,GATA3,HMGB1,IKBKB,IRF1,JUN,MYC,NFKB1,NFKBIA,NFkB (complex),P38 MAPK,PARP1,PPARG,RELA,RELB,STAT3,YAP1,ZFP36,sulforafan
CEBPA		transcription regulator		0.454	0.00344	C3,CCL20,CDKN1A,CTNNA1,DDX21,ICAM1,TGFB2	ADIPOQ,CEBPA,FOXO1,JUN,MYC,NFKB1,NFKBIA,NFkB (complex),NfkB1-RelA,PPARA,PPARG,RELA,STAT3
CDK4/6		group			0.00351	FLNA,LASP1,PDLIM4
sulindac sulfide		chemical drug			0.00351	CDKN1A,DYNLL1,PPP2R1A
IL3		cytokine	Activated	2	0.00352	ADGRE5,BIRC3,CDKN1A,GADD45B,ICAM1,VCAM1	CEBPD,E2F1,EGR1,EPAS1,ERK1/2,FOXO1,FOXO3,ID2,IL3,JUN,MYC,NFKB1,NFKBIA,NFkB (complex),NR3C1,PI3K (complex),RELA,STAT1,STAT5A,STAT5B
hydrocortisone		chemical - endogenous mammalian		0.849	0.00359	ANKRD1,GADD45B,ICAM1,NFKBIA	CXCL8,FOXO3,IL6,JUN,MYC,NFKB1,NFKBIA,NFkB (complex),RELA,RNA polymerase II,STAT5A,dexamethasone,hydrocortisone
ACKR1		g-protein coupled receptor			0.00361	ICAM1,VCAM1	ACKR1,CEBPD,CXCL8,ERK1/2,FOXO1,JUN,NFkB (complex),RELA
FOXF1		transcription regulator			0.00361	CDKN1A,VCAM1
Fibrinogen		complex			0.00361	BCL3,ICAM1
Lymphotoxin		complex			0.00361	ICAM1,VCAM1	LTBR,Lymphotoxin,MAP3K14,NFKB1,NFKB2,NFKBIA,NFkB (complex),RELA,RELB
PD 169316		chemical - kinase inhibitor			0.00361	BIRC3,CDKN1A	EPAS1,JUN,NFKB1,NR3C1,PD 169316,PI3K (complex),RELA
SP100		transcription regulator			0.00361	CDKN1A,ICAM1
SRA1		transcription regulator			0.00361	CCL20,TGFB2
ST8SIA1		enzyme			0.00361	C3,CDKN1A
elovanoid N34		chemical - endogenous mammalian			0.00361	CDKN1A,ICAM1
tranilast		chemical drug			0.00361	CDKN1A,VCAM1	CEBPD,ERK1/2,FOXO1,IL10,JUN,NFKB1,NFKB2,NFkB (complex),RELA,STAT3,tranilast
GnRH-A		chemical reagent			0.00365	CDKN1A,GADD45B,SERPINB9
LGALS1		other			0.00365	CDKN1A,CXCL16,IFNGR1
FOXO1		transcription regulator		1.541	0.00374	BIRC3,CCL20,CDKN1A,GADD45B,ICAM1,SFN,VCAM1	CEBPD,EGR1,ERK1/2,FOXO1,FOXO3,IL6,JUN,NFKB1,NFKBIA,NFkB (complex),RELA,RNA polymerase II,palmitic acid
PPARA		ligand-dependent nuclear receptor		0.068	0.00374	ANXA2,C3,CDKN1A,DYNLL1,F11R,NFKBIA,VCAM1	CEBPA,FOS,FOXO1,FOXO3,HDAC3,IL6,JUN,NFKB1,NFKBIA,NFkB (complex),NR3C1,NfkB1-RelA,PPARA,PPARG,RELA,palmitic acid,pirinixic acid
AGER		transmembrane receptor			0.0038	CDKN1A,ICAM1,VCAM1	AGER,CEBPD,EGR1,ERK1/2,FOXO1,FOXO3,IL6,JUN,MYC,NFKB1,NFKBIA,NFkB (complex),NOTCH1,Nfat (family),P38 MAPK,PPARG,RELA,RELB,Sod,YAP1,ZFP36
NOD2		other			0.00395	ICAM1,NFKB2,NFKBIA	CXCL8,EPAS1,IKBKG,JUN,NFKB1,NFKBIA,NFkB (complex),NOD2,NR3C1,PI3K (complex),RELA,RELB,RIPK2
ETS		group			0.00395	ICAM1,LTB
TNFSF9		cytokine			0.00395	ICAM1,VCAM1	EGR1,MYC,NFKB1,NFKB2,NFKBIA,NFkB (complex),P38 MAPK,PPARG,RELA,TNFRSF1A,TNFSF9,YAP1,ZFP36
Tnf receptor		group			0.00395	C3,CCL20	CEBPD,ERK1/2,FOS,FOXO1,JUN,NFkB (complex),RELA,STAT1,STAT3,Tnf receptor
prostaglandin A1		chemical - endogenous non-mammalian			0.00395	CDKN1A,NFKBIA	JUN,PPARA,PPARG,prostaglandin A1
salinosporamide A		chemical drug			0.00395	BIRC3,ICAM1
IL1		group	Activated	2.41	0.00405	C3,CCL20,CDKN1A,ICAM1,RELB,VCAM1	CEBPD,EGR1,ERK1/2,FOXO1,HMGB1,IKBKB,IL1,IRF1,JUN,LDL,NFKB1,NFKBIA,NFkB (complex),RELA,RELB,STAT1,STAT3
Y 27632		chemical drug			0.0041	CDKN1A,ICAM1,VCAM1	CEBPD,EGR1,ERK1/2,FOXO1,JUN,MYC,NFKB1,NFkB (complex),P38 MAPK,PPARG,RELA,RHOA,RNA polymerase II,Rock,SIRT1,SMAD1,Y 27632,YAP1,ZFP36
isotretinoin		biologic drug			0.0041	CDKN1A,NFKB2,VCAM1	GATA3,HMGB1,JUN,NFKB1,NFkB (complex),PARP1,PRKDC,STAT3,isotretinoin
miR-199a-5p (and other miRNAs w/seed CCAGUGU)		mature microrna			0.0041	C3,CDKN1A,SAMD9L
ERK		group		1.121	0.0042	CDKN1A,CLDN4,ICAM1,SFN,ZFP36L1	ERK,ETV5
GATA3		transcription regulator		-1.98	0.0042	BOK,CDKN1A,ICAM1,LTB,VCAM1	GATA3,HMGB1,IL10,IL5,NFKB1,NFKB2,NFkB (complex),PARP1,RELA,STAT3,STAT5A
JAK2		kinase			0.00424	CDKN1A,ICAM1,MYL12A,TP53INP1	BCL2,E2F1,EGR1,FOXO1,FOXO3,GATA3,HMGB1,JAK1,JAK2,MYC,NFKB1,NFKBIA,NFkB (complex),PARP1,PPARG,RB1,RHOA,SMAD1,SP1,STAT3,STAT5A,TP53,YAP1
2'-fucosyllactose		chemical - endogenous mammalian			0.00428	ICAM1
3-(1-(3-imidazol-1-ylpropyl)-1H-indol-3-yl)-4-anilino-1H-pyrrole-2,5-dione		chemical - kinase inhibitor			0.00428	VCAM1
7-bromoindirubin-3'-oxime		chemical - kinase inhibitor			0.00428	CDKN1A
ACVR2B		kinase			0.00428	CDKN1A
ARMC10		other			0.00428	CDKN1A
CABLES1		other			0.00428	CDKN1A
CAMK2		group			0.00428	BIRC3
CCDC22		other			0.00428	BIRC3
CCNI		other			0.00428	CDKN1A
CDT1		other			0.00428	CDKN1A
CFD		peptidase			0.00428	C3
CFI		peptidase			0.00428	C3
CPB1		peptidase			0.00428	CASP4
CUL9		other			0.00428	CDKN1A
CXXC1		transcription regulator			0.00428	CDKN1A
CYTH2	0.028	other			0.00428	ARF6
DHX8		enzyme			0.00428	CDKN1A
DNAJB12		other			0.00428	BOK
DNASE1L3		enzyme			0.00428	CDKN1A
EBF4		transcription regulator			0.00428	CDKN1A
EPSTI1		other			0.00428	NFKBIA
FILIP1		other			0.00428	FLNA
FKBPL		other			0.00428	CDKN1A
FXYD1		ion channel			0.00428	CDKN1A
HCG11		other			0.00428	CDKN1A
ING3		other			0.00428	CDKN1A
IPCEF1		enzyme			0.00428	ARF6
JADE1		transcription regulator			0.00428	CDKN1A
KCTD10		ion channel			0.00428	RHOB
LINC00475		other			0.00428	CDKN1A
LINC00672		other			0.00428	LASP1
Lamin b		group			0.00428	LMNA
MACROD1		enzyme			0.00428	NFKBIA
MYADM		other			0.00428	ICAM1
NLRP2		other			0.00428	ICAM1
NSC 126405		chemical reagent			0.00428	CDKN1A
PCLAF		other			0.00428	CDKN1A
PMM2		enzyme			0.00428	ICAM1
RND2		enzyme			0.00428	RHOB
Rcan1		other			0.00428	FLNA
Rho gdi		group			0.00428	RHOB
SC-19220		chemical reagent			0.00428	ICAM1
SCML2		transcription regulator			0.00428	CDKN1A
SLC52A1		transporter			0.00428	ICAM1
STXBP1		transporter			0.00428	STX11
STXBP2		transporter			0.00428	STX11
TDP-665759		chemical reagent			0.00428	CDKN1A
UBE2E1		enzyme			0.00428	CDKN1A
USP20		peptidase			0.00428	VCAM1
WFDC1		other			0.00428	ICAM1
ZBTB5		transcription regulator			0.00428	CDKN1A
ZBTB7C		transcription regulator			0.00428	CDKN1A
ZBTB8A		other			0.00428	CDKN1A
beta-escin		chemical drug			0.00428	CDKN1A
diisopropanolnitrosamine		chemical toxicant			0.00428	CDKN1A
inolitazone		chemical drug			0.00428	CDKN1A
miR-455-3p (miRNAs w/seed CAGUCCA)		mature microrna			0.00428	CACUL1
miR-523-3p (miRNAs w/seed AACGCGC)		mature microrna			0.00428	CDKN1A
nafoxidine		chemical drug			0.00428	C3
ricinoleic acid		chemical - endogenous non-mammalian			0.00428	VCAM1
FAM3B		cytokine			0.00432	CASP4,CDKN1A	CASP3,FAM3B,FOXO3,RB1,STAT1,STAT3
Pde4		group			0.00432	CDKN1A,ICAM1
evodiamine		chemical - endogenous non-mammalian			0.00432	BIRC3,ICAM1	IKK (complex),NFKB1,NFKBIB,NFKBIE,NFkB (complex),RELA,evodiamine
zidovudine		chemical drug			0.00432	BCL3,CDKN1A
cytokine		group		1.921	0.00434	BCL3,ICAM1,TGFB2,VCAM1	E2F1,HDAC3,IKK (complex),MAPKAPK2,NFKB1,NFKBIA,NFKBIB,NFKBIE,NFkB (complex),NOTCH1,REL,RELA,RELB,SMAD4,SMAD7,ZFP36,cytokine,hyaluronic acid
captopril		chemical drug			0.00441	S100A10,TGFB2,TNFRSF12A
cerivastatin		chemical drug			0.00441	CDKN1A,ICAM1,VCAM1	CEBPA,CEBPD,EGR1,ERK1/2,FOXO1,JUN,LDL,MYC,NFKB1,NFKBIA,NFkB (complex),NfkB1-RelA,P38 MAPK,PPARA,PPARG,RELA,RHOA,SMAD1,STAT1,YAP1,ZFP36,cerivastatin
tacrolimus		chemical drug			0.00442	FLNA,NFKBIA,OSBPL3,PDLIM4,TNFRSF12A
PRKCE		kinase			0.00457	BIRC3,CDKN1A,VCAM1	CEBPD,ERK1/2,FOXO1,IKBKB,IRF1,JUN,NFKB1,NFKB2,NFKBIA,NFkB (complex),NOTCH1,PRKCD,PRKCE,PRKDC,RELA,RELB
Nr1h		group		-1	0.00465	BCL3,C3,LTB,NFKB2	CSF2,JUN,NFKB1,NFKBIA,NFkB (complex),Nr1h,RELA,RELB,STAT3,STAT5A
aldosterone		chemical - endogenous mammalian		0.85	0.00465	FKBP1A,ICAM1,NFKBIA,VCAM1	AGT,FOXO1,FOXO3,IL6,JUN,MYC,NFKB1,NFKBIA,NFkB (complex),PPARG,RELA,RHOA,Rock,SMAD1,YAP1,aldosterone
alitretinoin		chemical drug		1.117	0.00465	CASP4,CCL20,CDKN1A,IFNGR1	FOS,FOXO3,IL1B,IL6,JUN,NFKB1,NFKBIA,NFkB (complex),NOTCH1,RB1,RELA,RELB,SP1,STAT1,STAT3,TP53,alitretinoin
BMPER		other			0.0047	ICAM1,VCAM1	BMPER,GDF2,SMAD1,SMAD5
CD81		other			0.0047	ICAM1,VCAM1	CD81,CEBPD,ERK1/2,FOXO1,JUN,NFKBIA,NFkB (complex),Nfat (family),PPARA,PRKCA,RB1,RELA,SMAD4,SMAD7,hyaluronic acid
HOXA5		transcription regulator			0.0047	CDKN1A,GADD45B
RNF20		enzyme			0.0047	CDKN1A,RHOB
zerumbone		chemical - endogenous non-mammalian			0.0047	BIRC3,ICAM1	IKK (complex),NFKB1,NFKBIB,NFKBIE,NFkB (complex),RELA,zerumbone
(+)-MK-801		chemical drug			0.00474	CDKN1A,ICAM1,NFKBIA	(+)-MK-801,ERK,ETV5,GATA3,JUN,NFKBIA,NFKBIB,NFkB (complex),RELA,Tnf (family)
DYSF		other			0.00474	ANKRD1,ANXA2,ETF1
KLF6		transcription regulator			0.00474	CDKN1A,NFKBIA,TNIP1	JUN,KLF6,NFKB1,NFKBIA,NFkB (complex),RELA,RELB,STAT5A
cigarette smoke		chemical toxicant		1.95	0.00488	C3,CDKN1A,ICAM1,NFKBIA,PTP4A1	CEBPD,CSF2,ERK1/2,FOXO1,FOXO3,IL1B,IL6,JUN,NFKB1,NFKBIA,NFkB (complex),RELA,RELB,STAT3,cigarette smoke
N-Ac-Leu-Leu-norleucinal		chemical - protease inhibitor			0.00491	CDKN1A,ICAM1,NFKBIA	BCL2,EGFR,FOXO3,HDAC3,N-Ac-Leu-Leu-norleucinal,NFKB1,NFKBIA,NFkB (complex),NR3C1,PGR,RB1,REL,RELB,RNA polymerase II,SMAD1,SMAD2,SMAD3,SMAD4,SP1,STAT5A,TP53
CD38		enzyme		0.283	0.00508	ANXA2,GLIPR2,ICAM1,VCAM1
C3	0.153	peptidase			0.00508	C3,CASP4,CXCL16	C3,FOS,HDAC3,JUN,NFkB (complex),NR3C1,RELA
CXCL8		cytokine			0.00508	ICAM1,NFKBIA,VCAM1	CHUK,CXCL8,E2F1,EPAS1,FOXO3,IFI16,IL6,Interferon alpha,JUN,NFKB1,NFKBIA,NFkB (complex),NR3C1,Nfat (family),PI3K (complex),PPARA,PRKCA,RB1,RELA,STAT1
fingolimod		chemical drug			0.00508	CCL20,CDKN1A,ICAM1	CEBPD,ERK1/2,FOXO1,GATA3,HMGB1,JUN,NFKB1,NFKB2,NFKBIA,NFkB (complex),Nfat (family),PARP1,PPARA,PRKCA,PRKCB,PRKCD,RB1,RELA,STAT3,fingolimod
COMMD1		transporter			0.00509	BIRC3,NFKBIA
HEXIM1		transcription regulator			0.00509	CDKN1A,TGFB2
SLPI		other			0.00509	ICAM1,NFKBIA	CXCL8,NFKB1,NFKBIB,NFkB (complex),RELA,SLPI
UBE3A		enzyme			0.00509	CDKN1A,TP53INP1
UCN-01		chemical drug			0.00509	CDKN1A,RHOB	AKT1,AR,Akt,EGR1,JUN,KRAS,MYC,NFKB1,NFKBIA,P38 MAPK,PPARG,RELB,TP53,UCN-01,YAP1,ZFP36
kaempferol		chemical toxicant			0.00509	CDKN1A,ICAM1	CEBPD,EGR1,EPAS1,ERK,ERK1/2,ETV5,FOXO1,JAK1,JUN,MYC,NFKB1,NFkB (complex),NR3C1,P38 MAPK,PI3K (complex),PPARG,RELA,STAT3,STAT5A,YAP1,ZFP36,kaempferol
CSF1		cytokine	Activated	2.2	0.00513	ADGRE5,CDKN1A,IFNGR1,NFKB2,VCAM1	CSF1,EPAS1,IL1A,IL1B,JUN,MYC,NFKB1,NFKBIA,NFkB (complex),NR3C1,PI3K (complex),PTK2,RELA,Rock,YAP1
STAT3		transcription regulator		1.815	0.0052	BCL3,CASP4,CCL20,CDKN1A,ICAM1,NEURL3,NFKB2,SERPINB9	FOS,HDAC3,IFNG,IL1B,JUN,NFKB1,NFKBIA,NFkB (complex),NOTCH1,NR3C1,RELA,RELB,STAT1,STAT3
FFAR3		g-protein coupled receptor			0.00526	ADGRV1,ICAM1,MLPH
MACROH2A1		other			0.00526	ANXA2,CDKN1A,LTB
mir-17		microrna			0.00526	BIRC3,CDKN1A,TP53INP1
MAPK9		kinase		-0.338	0.00542	BIRC3,CDKN1A,GADD45B,LMNA
PPARG		ligand-dependent nuclear receptor		-0.168	0.00542	C3,CDKN1A,F11R,Gm12854/S100a11,ICAM1,RHOB,VCAM1	CEBPD,EGR1,ERK1/2,FOXO1,GATA3,JUN,MYC,NCOR2,NFKB1,NFKBIA,NFkB (complex),P38 MAPK,PPARA,PPARG,RELA,RHOA,SMAD1,YAP1,ZFP36,troglitazone
apigenin		chemical - endogenous non-mammalian			0.00544	CDKN1A,ICAM1,VCAM1	CEBPD,CXCL8,EGR1,ERK1/2,FOXO1,FOXO3,IL6,JUN,MYC,NFKB1,NFKBIA,NFkB (complex),NOTCH1,P38 MAPK,PPARG,RELA,YAP1,ZFP36,apigenin,resveratrol
HSPD1		enzyme			0.0055	ICAM1,VCAM1	CEBPD,EGR1,ERK1/2,FOXO1,HSPD1,IKK (complex),IL17A,JUN,MYC,NFKB1,NFKBIA,NFKBIB,NFKBIE,NFkB (complex),P38 MAPK,PPARG,RELA,TLR4,YAP1,ZFP36
NfkB1-RelA		complex			0.0055	ICAM1,VCAM1
PHF1		transcription regulator			0.0055	CDKN1A,SFN	EZH2,GATA3,NFKB1,PHF1
PSMD10		transcription regulator			0.0055	CDKN1A,ICAM1	E2F1,FOS,JUN,NFKB1,NFkB (complex),PSMD10,RELA,RNA polymerase II,SIRT1,STAT1,STAT3
RCAN1		transcription regulator			0.0055	ICAM1,VCAM1	CXCL8,NFKB1,NFKBIA,NFkB (complex),Nfat (family),RCAN1,RELA,cytokine
geranylgeranyl pyrophosphate		chemical - endogenous mammalian			0.0055	ICAM1,VCAM1	CEBPA,CEBPD,EGR1,ERK1/2,FOS,FOXO1,IL18,JUN,MYC,NFKB1,NFKBIA,NFkB (complex),NfkB1-RelA,P38 MAPK,PPARA,PPARG,RELA,RHOA,SMAD1,YAP1,ZFP36,geranylgeranyl pyrophosphate
immethridine		chemical reagent			0.0055	C3,VCAM1
linolenic acid		chemical - endogenous mammalian			0.0055	ICAM1,NFKBIA
P38 MAPK		group	Activated	2.194	0.00556	CDKN1A,FLNA,ICAM1,RHOB,TNIP1,VCAM1	CEBPA,EGF,EZH2,FOXO1,GATA3,HMGB1,ID2,JUN,MRTFA,MRTFB,MYC,NFKB1,NFkB (complex),NfkB1-RelA,P38 MAPK,PARP1,PPARA,PPARG,RELA,SMAD1,SMAD7,STAT3,TNFSF11,WWTR1,YAP1
FOXA1		transcription regulator			0.00565	CDKN1A,LHFPL6,PAM,TNFRSF12A
SATB1		transcription regulator		-1.103	0.00577	CDKN1A,CTNNA1,GADD45B,RELB
IL17A		cytokine	Activated	2.191	0.00591	BCL3,C3,CCL20,ICAM1,VCAM1	CEBPD,ERK1/2,FOXO1,FOXO3,IL13,IL17A,IL1B,IL6,JUN,NFKB1,NFKBIA,NFkB (complex),RELA,RELB
PROCR		other			0.00593	ICAM1,VCAM1	CEBPD,EGR1,ERK1/2,F2R,FOS,FOXO1,GATA3,JUN,MYC,NFKB1,NFkB (complex),Nfat (family),P38 MAPK,PPARG,PROCR,RELA,S1PR1,YAP1,ZFP36
CCN1		other			0.006	BOK,C3,CDKN1A	AR,CCN1,CCND1,CDKN2A,NFKBIA,RB1,SMAD3
PIK3R1		kinase			0.006	ICAM1,TGFB2,VCAM1	GATA3,HMGB1,NFKB1,NFkB (complex),PARP1,PIK3R1,STAT3
Salmonella enterica serotype abortus equi lipopolysaccharide		chemical toxicant	Activated	2	0.00602	BIRC3,CCL20,GADD45B,HECW2
SMARCA4		transcription regulator		1.086	0.00609	CD47,CDKN1A,GADD45B,ICAM1,LMNA,NFKB2,PTP4A1,TGFB2	FOXO3,NFKBIA,NOTCH1,NR3C1,RB1,SMARCA4,TP53
S100A9		other		1.091	0.00614	BCL3,C3,ICAM1,VCAM1	CEBPD,ERK1/2,FOXO1,FOXO3,IL6,JUN,NFKB1,NFKBIA,NFkB (complex),REL,RELA,S100A8,S100A9,STAT5A,cytokine
NRG1		growth factor	Activated	2.183	0.00619	ANKRD1,CDKN1A,FLNA,LHFPL6,TGFB2	AKT1,AR,ATF4,MAP2K1,NCOA3,NFKB1,NFKBIA,NFkB (complex),NRG1,RELB,SMAD3,SP1,TP53
FEV		transcription regulator			0.0062	ANXA2,ICAM1,VCAM1
5-azacytidine		chemical drug		1.969	0.00627	ANXA2,CDKN1A,CTNNA1,RHOB
raloxifene		chemical drug		0.832	0.00627	BCL3,CDKN1A,DYNLL1,TGFB2	AR,ATF4,NCOA3,NCOR1,YAP1,raloxifene
KRAS		enzyme		-1.342	0.00634	BCL7C,BIRC3,CDKN1A,GPM6B,NFKB2,NFKBIA,RHOB,TNFRSF12A,ZFP36L1	AKT1,AR,Akt,EGFR,EPAS1,ERBB2,FOXO3,HDAC3,JUN,KRAS,NFKB1,NFKBIA,NR3C1,PI3K (complex),RELA,RELB,SP1,STAT3,STAT5A,TP53,YAP1
NCF1		enzyme			0.00636	CDKN1A,ICAM1	EGR1,ERK,ETV5,FADD,FOXO3,JAK2,MYC,NCF1,NFKB1,NFkB (complex),P38 MAPK,PPARG,YAP1,ZFP36
hydrochloric acid		chemical - endogenous mammalian			0.00636	ICAM1,VCAM1	AGER,CXCL8,IL10,NFKB1,NFKB2,NFkB (complex),RELA,STAT3,hydrochloric acid
CHADL		other			0.00682	CDKN1A,VCAM1
HOXB13		transcription regulator			0.00682	CDKN1A,NFKBIA
NFIL3		transcription regulator			0.00682	CDKN1A,GADD45B	EGR1,FOXO1,NFIL3,PPARG,RNA polymerase II,SIRT1
deoxynivalenol		chemical toxicant			0.00682	CLDN4,ICAM1
selumetinib		chemical drug			0.00682	CDKN1A,DDX21
silymarin		chemical drug			0.00682	ICAM1,LTB
stearic acid		chemical - endogenous mammalian			0.00682	ICAM1,NFKBIA	ADIPOQ,E2F1,EGR1,FOXO1,FOXO3,MYC,NFKB1,NFKBIA,NFkB (complex),RELA,STAT3,stearic acid
AR		ligand-dependent nuclear receptor		1.718	0.00682	ANKRD1,C3,CDKN1A,PMEPA1,RHOB,TGFB2,TNFRSF12A	AKT1,AR,ATF4,Akt,CEBPA,CEBPD,JUN,MYC,NCOA3,NFKB1,NFKBIA,NFkB (complex),RB1,RELA,RELB,SMAD3,SMAD4,SMAD7,TP53,YAP1,dihydrotestosterone
RASSF1		other			0.00702	CASP4,CDKN1A,TP53INP1	CASP3,FOXO3,GATA3,HMGB1,NFKB1,NFkB (complex),PARP1,RASSF1,RB1,STAT1,STAT3
nocodazole		chemical reagent			0.00702	CDKN1A,FLNA,PAK3	CCND1,ELAVL1,MAP2K1,NCOA3,NFKB1,NFkB (complex),SP1,nocodazole
aspirin		chemical drug		-0.919	0.00707	CDKN1A,ICAM1,SERPINB9,VCAM1	EGR1,FOXO1,FOXO3,GATA3,HMGB1,IL1B,JUN,MYC,NFKB1,NFKBIA,NFkB (complex),P38 MAPK,PARP1,PPARG,RELA,RHOA,SMAD1,STAT3,YAP1,ZFP36,aspirin,palmitic acid
PSEN1		peptidase			0.0071	ARF6,C3,FKBP1A,GADD45B,GPM6B,PAK3
sphingosine-1-phosphate		chemical - endogenous mammalian			0.00723	ANXA2,ICAM1,VCAM1	CXCL8,FOXO1,FOXO3,GATA3,MYC,NFKB1,NFkB (complex),Pdgf (complex),RELA,Rock,S1PR1,SMAD1,YAP1,sphingosine-1-phosphate
C1QA		other			0.00728	C3,S100A10
CASP3		peptidase			0.00728	CASP4,CDKN1A	CASP3,E2F1,EGR1,FOS,FOXO1,FOXO3,GATA3,HMGB1,JUN,MYC,NFKB1,NFkB (complex),PARP1,RB1,SP1,STAT1,STAT3,TP53
Focal adhesion kinase		group			0.00728	ICAM1,VCAM1	CEBPD,CXCL8,EGR1,ERK1/2,FOXO1,Focal adhesion kinase,JUN,MYC,NFKB1,NFKBIA,NFkB (complex),Nfat (family),P38 MAPK,PPARA,PPARG,PRKCA,RB1,RELA,RHOA,SMAD1,YAP1,ZFP36
R-WIN 55,212		chemical reagent			0.00728	ICAM1,VCAM1	CEBPD,ERK1/2,FOXO1,GATA3,HMGB1,JUN,NFKB1,NFkB (complex),PARP1,R-WIN 55,212,RELA,STAT3
indican		chemical - endogenous mammalian			0.00728	CDKN1A,ICAM1	EGR1,ERK,ETV5,FOS,JUN,MYC,NFKB1,NFkB (complex),P38 MAPK,PPARG,STAT1,STAT3,YAP1,ZFP36,indican
tosedostat		chemical drug			0.00728	CDKN1A,CHAC1
Hbb-b1		transporter			0.00745	ICAM1,LTB,VCAM1
dextran sulfate		chemical drug			0.00751	C3,ICAM1,ST14,TGFB2,VCAM1	EGR1,HDAC3,IGFBP3,IL17A,JUN,LDL,NFKB1,NFKBIA,NFkB (complex),REL,RELA,STAT1,dextran sulfate
E. coli B4 lipopolysaccharide		chemical toxicant		1.607	0.00761	CCL20,ICAM1,NFKBIA,RELB,VCAM1	E. coli B4 lipopolysaccharide,IKBKB,IRF1,JUN,NFKB1,NFKB2,NFKBIA,NFkB (complex),NOTCH1,PRKCD,RELA,RELB,TLR4,TNFAIP3
ATF2		transcription regulator			0.00767	RHOB,TGFB2,VCAM1
miR-291a-3p (and other miRNAs w/seed AAGUGCU)		mature microrna			0.00767	C3,CDKN1A,STX11
ACKR3		g-protein coupled receptor			0.00776	CDKN1A,RRAS
CFB		peptidase			0.00776	C3,TGFB2
CLU		other			0.00776	CDKN1A,NFKBIA	AR,Akt,CLU,ESR1,HDAC3,JUN,NFKB1,RB1,SMAD4,SP1,YAP1
NR2E1		ligand-dependent nuclear receptor			0.00776	CDKN1A,TGFB2	AR,NCOA3,NR2E1,SMAD3
SMAD5		transcription regulator			0.00776	ICAM1,VCAM1
TIRAP		other			0.00776	ICAM1,VCAM1	CEBPD,E2F1,EGR1,ERK1/2,FOXO1,JUN,MAPKAPK2,MYC,NFKB1,NFKBIA,NFKBIB,NFkB (complex),P38 MAPK,PPARG,RELA,TIRAP,TLR4,YAP1,ZFP36,cytokine
anakinra		biologic drug			0.00776	ICAM1,VCAM1
clodronic acid		chemical drug			0.00776	ICAM1,VCAM1
genistein		chemical drug		-0.56	0.00789	BCL3,C3,CDKN1A,ICAM1,OSBPL3,VCAM1	CEBPD,ERK1/2,FOXO1,FOXO3,HMGB1,IL1,IL6,JUN,MYC,NFKB1,NFKBIA,NFkB (complex),RELA,RELB,Rock,YAP1,genistein
estrogen		chemical drug		0.314	0.00806	BCL3,CDKN1A,ICAM1,SERPINB9,TGFB2	CEBPA,ESR1,FOS,IFNG,IL1B,JUN,NCOA3,NCOR1,NFKB1,NFKBIA,NFkB (complex),RELA,SMAD3,STAT3,TNF,calcitriol,estrogen,estrogen receptor
STAT5A		transcription regulator		0.447	0.00817	BIRC3,CASP4,CDKN1A,ICAM1,LTB	CSF3,FOXO3,GATA3,IL2,JUN,NFKB1,NFKBIA,NFkB (complex),NR3C1,RELA,STAT3,STAT5A,STAT5B,TP53
Fc gamma receptor		group			0.00826	CDKN1A,ICAM1	EGR1,EPAS1,ERK,ETV5,Fc gamma receptor,IL10,JUN,MYC,NFKB1,NFKB2,NFkB (complex),NR3C1,P38 MAPK,PI3K (complex),PPARG,RELA,STAT3,YAP1,ZFP36
ICMT		enzyme			0.00826	CDKN1A,LMNA
PRKCZ		kinase			0.00826	NFKBIA,VCAM1	AR,Akt,JUN,NFKB1,NFKB2,NFkB (complex),PRKCD,PRKCZ,RELA,YAP1
PRKG1		kinase			0.00826	CDKN1A,VCAM1	AR,Akt,CEBPD,EGR1,ERK1/2,FOXO1,JUN,MYC,NFKB1,NFkB (complex),PPARG,PRKG1,RELA,RHOA,RNA polymerase II,Rock,SIRT1,SMAD1,YAP1
Stat3-Stat3		complex			0.00826	CDKN1A,ICAM1
UXT		transcription regulator			0.00826	NFKBIA,PMEPA1
collagenase		group			0.00826	ICAM1,VCAM1	JUN,NFKBIA,NFKBIB,NFkB (complex),RELA,Tnf (family),collagenase
etanercept		biologic drug			0.00826	CCL20,ICAM1	JUN,NFKB1,NFKB2,NFkB (complex),PRKCD,RELA,etanercept
irbesartan		chemical drug			0.00826	ICAM1,VCAM1	EGR1,MYC,P38 MAPK,PPARG,YAP1,ZFP36,irbesartan
CDK19		kinase			0.00836	CDKN1A,SFN,ZFP36L1
NCOR1		transcription regulator			0.00836	BCL3,CDKN1A,PMEPA1
SMAD2		transcription regulator			0.00836	CCL20,CDKN1A,GADD45B	AR,CEBPA,CEBPD,FOXO3,IL6,JUN,NFKB1,NFKBIA,NFkB (complex),SMAD1,SMAD2,SMAD3,SMAD4,SMAD7,SP1
1-o-hexadecyl-2-o-methyl-rac-glycerol		chemical - kinase inhibitor			0.00854	CDKN1A
1-phenazinecarboxylic acid		chemical - endogenous non-mammalian			0.00854	ICAM1
17-epiestriol		chemical - endogenous mammalian			0.00854	VCAM1
ACER3		enzyme			0.00854	CDKN1A
ADRM1		other			0.00854	NFKBIA
ARFGEF2		other			0.00854	FLNA
CCT5		other			0.00854	CDKN1A
CGGBP1		transcription regulator			0.00854	CDKN1A
COPS6		other			0.00854	SFN
CRTAP		other			0.00854	CDKN1A
CYTH3		other			0.00854	ARF6
Cops2		transcription regulator			0.00854	CDKN1A
DDX24		enzyme			0.00854	CDKN1A
DUOX2		enzyme			0.00854	CDKN1A
ELAC2		enzyme			0.00854	CDKN1A
EPB42		transporter			0.00854	CD47
EXOC5		other			0.00854	ARF6
FAM168A		other			0.00854	NFKBIA
FBXL12		other			0.00854	CDKN1A
FGB		other			0.00854	ICAM1
GALR2		g-protein coupled receptor			0.00854	CDKN1A
HPGD		enzyme			0.00854	CDKN1A
ING5		other			0.00854	CDKN1A
Importin alpha		group			0.00854	CDKN1A
KHDRBS2		other			0.00854	CDKN1A
KLHL40		other			0.00854	TP53INP1
KT 5926		chemical - kinase inhibitor			0.00854	VCAM1
L-ornithine		chemical - endogenous mammalian			0.00854	CDKN1A
MAGEA2/MAGEA2B		other			0.00854	CDKN1A
MAGEA4		other			0.00854	CDKN1A
MI-63		chemical reagent			0.00854	CDKN1A
MIR31HG		other			0.00854	CDKN1A
N(omega)-hydroxyarginine		chemical - endogenous mammalian			0.00854	CDKN1A
NASP		other			0.00854	CDKN1A
NEK4		kinase			0.00854	CDKN1A
NSA2		other			0.00854	CDKN1A
Npm		group			0.00854	CDKN1A
PARL		peptidase			0.00854	TTC19
PCBP4		other			0.00854	CDKN1A
PEX2		other			0.00854	CDKN1A
PGAM1		phosphatase			0.00854	CDKN1A
POLDIP3		other			0.00854	CDKN1A
Par		group			0.00854	CCL20
RHCE/RHD		transporter			0.00854	CD47
RNF126		enzyme			0.00854	CDKN1A
SALL2		transcription regulator			0.00854	CDKN1A
Sf1		other			0.00854	VCAM1
TSPYL2		other			0.00854	CDKN1A
USP42		peptidase			0.00854	CDKN1A
WDR13		other			0.00854	CDKN1A
ZBTB49		transcription regulator			0.00854	CDKN1A
ZFYVE16		other			0.00854	CDKN1A
arbutin		chemical drug			0.00854	CDKN1A
chalcone-24		chemical reagent			0.00854	BIRC3
chartreusin		chemical reagent			0.00854	CDKN1A
cycloastragenol		chemical reagent			0.00854	CDKN1A
cyproconazole		chemical drug			0.00854	GADD45B
flunisolide		chemical drug			0.00854	ICAM1
hdm-2 antagonistic peptide		chemical reagent			0.00854	CDKN1A
kynurenic acid		chemical - endogenous mammalian			0.00854	CDKN1A
lauroylcarnitine		chemical - endogenous mammalian			0.00854	CLDN4
nitrosonifedipine		chemical reagent			0.00854	ICAM1
omethoate		chemical toxicant			0.00854	CDKN1A
oxazepam		chemical drug			0.00854	GADD45B
polyethylene glycol		chemical drug			0.00854	CDKN1A
polyinosinic acid		chemical reagent			0.00854	VCAM1
procaterol		chemical drug			0.00854	ICAM1
securinine		chemical reagent			0.00854	CDKN1A
sodium fluoride		chemical drug			0.00854	ICAM1
telomestatin		chemical - endogenous non-mammalian			0.00854	CDKN1A
tyrphostin B56		chemical - kinase inhibitor			0.00854	ICAM1
vinflunine		chemical drug			0.00854	CDKN1A
BMP6		growth factor			0.0086	CDKN1A,PMEPA1,TNFRSF12A
EIF2AK2		kinase			0.0086	CDKN1A,NFKB2,NFKBIA	CHUK,EIF2AK2,FOXO3,IKBKB,IL1B,IRF1,JUN,NFKB1,NFKBIA,NFkB (complex),RELA,RELB,STAT5A
LGALS3		other			0.0086	CDKN1A,ICAM1,VCAM1	CEBPD,EPAS1,ERK1/2,FOXO1,FOXO3,IL6,JUN,LGALS3,NFKB1,NFKBIA,NFkB (complex),NR3C1,PI3K (complex),PPARG,PTK2,RELA,RHOA,SMAD1,YAP1
AHCY		enzyme			0.00877	ICAM1,VCAM1
ALOX15		enzyme			0.00877	ICAM1,VCAM1	ALOX15,CEBPA,CEBPD,EGR1,ERK1/2,FOXO1,JUN,LDL,MYC,NFKB1,NFKBIA,NFkB (complex),NfkB1-RelA,P38 MAPK,PPARA,PPARG,RELA,RHOA,SMAD1,STAT1,YAP1,ZFP36
ARHGAP31		other			0.00877	GADD45B,TGFB2
GDF11		growth factor			0.00877	ICAM1,VCAM1
GJA1		transporter			0.00877	CDKN1A,ICAM1
HLX		transcription regulator			0.00877	ANKRD1,ICAM1
NRXN1		transporter			0.00877	CD47,F11R
eplerenone		chemical drug			0.00877	ICAM1,VCAM1
honokiol		chemical - endogenous non-mammalian			0.00877	CDKN1A,ICAM1	CEBPD,EPAS1,ERK1/2,FOXO1,JUN,NFKB1,NFKBIA,NFkB (complex),NR3C1,Nfat (family),PI3K (complex),PPARA,PRKCA,RB1,RELA,honokiol
CpG ODN 2006		chemical reagent			0.00884	BIRC3,ICAM1,NFKB2	CpG ODN 2006,Immunoglobulin,JUN,NFKB1,NFKBIA,NFkB (complex),NOTCH1,RELA,RELB,STAT5A,poly rI:rC-RNA
ETV5		transcription regulator			0.00884	CLDN4,CTNNA1,ICAM1
N-nitro-L-arginine methyl ester		chemical drug			0.00884	ICAM1,NFKBIA,VCAM1	CXCL8,FAS,FOXO3,IL6,JUN,MYC,N-nitro-L-arginine methyl ester,NFKB1,NFKB2,NFKBIA,NFKBIB,NFkB (complex),RELA,Rock,Tnf (family),YAP1
NFAT5		transcription regulator			0.00884	CXCL16,HECW2,NFKBIA
lysophosphatidic acid		chemical - other			0.00884	ANKRD1,ICAM1,VCAM1	EZH2,IKK (complex),MRTFA,MRTFB,MYC,NFKB1,NFKBIA,NFKBIB,NFKBIE,NFkB (complex),NOTCH1,RELA,RELB,Rock,SMAD7,WWTR1,YAP1,lysophosphatidic acid
CDKN2A		transcription regulator	Activated	2.161	0.00901	C3,CDKN1A,NFKB2,PMEPA1,TP53INP1	AR,CCND1,CDKN2A,CEBPA,CEBPD,FOXO3,HDAC3,NCOA3,NFKB1,NFKBIA,NFkB (complex),RB1,REL,RELA,SMAD3,SMAD4,SMAD7,SP1,TP53
EGR1		transcription regulator			0.00902	CDKN1A,GADD45B,ICAM1,VCAM1	CEBPD,CXCL8,EGR1,ERK1/2,ESR1,FOXO1,FOXO3,JUN,MYC,NFKB1,NFkB (complex),RELA,SMAD3,SMAD4,TGFB1,TNF,VEGFA,VHL
SIRT1		transcription regulator		-0.577	0.00904	BIRC3,CDKN1A,DDAH2,ICAM1,NFKBIE,RELB	EPAS1,ESR1,HDAC3,JUN,MYC,NFKB1,NFKBIA,NFkB (complex),NOTCH1,RELA,RELB,RNA polymerase II,SIRT1,SP1,STAT5A,YAP1,estrogen receptor
4-(2-aminoethyl)benzenesulfonylfluoride		chemical - protease inhibitor			0.00929	CASP4,CDKN1A
ANXA2	0.24	other			0.00929	CDKN1A,S100A10
LOC105372576		other			0.00929	DYNLL1,TNFRSF12A
SELP		transmembrane receptor			0.00929	CDKN1A,SERPINB9
TIMP1		cytokine			0.00929	CDKN1A,ST14
bafilomycin A1		chemical drug			0.00929	NFKBIA,RHOB	KRAS,TP53,bafilomycin A1
bardoxolone		chemical drug			0.00929	CDKN1A,NFKBIA
bryostatin 1		chemical drug			0.00929	BIRC3,ICAM1	CEBPD,ERK1/2,FOXO1,JUN,NFKB1,NFKB2,NFkB (complex),PRKCD,RELA,bryostatin 1
fisetin		chemical toxicant			0.00929	BIRC3,ICAM1	IKK (complex),NFKB1,NFKBIB,NFKBIE,NFkB (complex),RELA,fisetin
green tea polyphenol		chemical drug			0.00929	CDKN1A,ICAM1	CEBPA,CEBPD,EGR1,ERK,ERK1/2,ETV5,FOXO1,HMGB1,JUN,MYC,NFKB1,NFKBIA,NFkB (complex),NfkB1-RelA,P38 MAPK,PPARA,PPARG,RELA,STAT3,YAP1,ZFP36,green tea polyphenol
CEBPD		transcription regulator			0.00934	C3,CCL20,CDKN1A	CEBPD,FOXO3,IL6,JUN,NFKB1,NFKBIA,NFkB (complex)
Pdgf (complex)		complex			0.00934	CDKN1A,ICAM1,VCAM1	EGR1,FOXO1,MYC,NFKB1,NFKBIA,NFkB (complex),Nfat (family),PPARA,PPARG,PRKCA,Pdgf (complex),RB1,RELA,RHOA,Rock,SMAD1,VEGFA,VHL,YAP1
YY1		transcription regulator			0.00938	ANKRD1,CDKN1A,PTBP3,TGFB2,TP53INP1	NFKB1,NFkB (complex),NOTCH1,RELA,TP53,YY1
bexarotene		chemical drug		0	0.00969	GPM6B,ICAM1,TGFB2,VCAM1	IGFBP3,RELA,bexarotene
cocaine		chemical drug		1.131	0.00969	DYNLL1,GADD45B,ICAM1,NFKB2
VEGFA		growth factor		0.65	0.00976	CDKN1A,CLIC4,ICAM1,LMNA,VCAM1	EGR1,FGF2,FOXO1,GATA3,HMGB1,JUN,MYC,NFKB1,NFKBIA,NFkB (complex),Nfat (family),PARP1,PPARA,PPARG,PRKCA,RB1,RELA,RHOA,SMAD1,SP1,STAT3,VEGFA,YAP1
IL17F		cytokine			0.00983	CCL20,ICAM1	CEBPD,ERK1/2,FOXO1,IL17A,IL17F,JUN,NFKB1,NFKBIA,NFkB (complex),RELA
PRKCQ		kinase			0.00983	CDKN1A,NFKB2	NFKB1,NFKB2,NFkB (complex),PRKCQ,RELA,RELB
andrographolide		chemical drug			0.00983	ICAM1,VCAM1	CEBPD,EGR1,ERK1/2,FOXO1,HMGB1,HMOX1,JUN,MYC,NFkB (complex),P38 MAPK,PPARG,RELA,SP1,YAP1,ZFP36,andrographolide
diclofenac		chemical drug			0.00983	CDKN1A,CLDN4
sodium orthovanadate		chemical reagent			0.00983	CDKN1A,NFKBIA	AR,Akt,BCL2,EPAS1,JUN,LYN,NFKB1,NFKB2,NFKBIA,NFkB (complex),NR3C1,PI3K (complex),PRKCD,RB1,RELA,SP1,STAT3,TP53,YAP1,sodium orthovanadate
NR1H2		ligand-dependent nuclear receptor			0.00985	C3,CXCL16,NFKBIA
TFAP2A		transcription regulator			0.00985	BIRC3,BOK,CDKN1A
bleomycin		chemical drug		1.987	0.01	C3,CDKN1A,ICAM1,TGFB2
INHA		growth factor			0.0104	F11R,LMNA,TP53INP1
GTF2B		transcription regulator			0.0104	CDKN1A,NFKBIA
NLRP12		other			0.0104	BCL3,ICAM1
PML-RARA		fusion gene/product			0.0104	CDKN1A,VCAM1
BRAF		kinase			0.0104	BIRC3,CDKN1A,GPM6B,ICAM1
PIK3CG		kinase			0.0106	APOBEC3B,CD47,ICAM1
FGFR3		kinase			0.0109	CDKN1A,LTB
MMP2		peptidase			0.0109	CDKN1A,PPP2R1A
alvocidib		chemical drug			0.0109	BIRC3,CDKN1A
lipoxin A4		chemical - endogenous mammalian			0.0109	CDKN1A,ICAM1
xanthohumol		chemical drug			0.0109	BIRC3,ICAM1
Mapk		group			0.0112	CDKN1A,CLDN4,VCAM1
IRF3		transcription regulator		1	0.0113	APOBEC3B,BIRC3,CLIC4,SAMD9L
NR1I3		ligand-dependent nuclear receptor			0.0115	CDKN1A,GADD45B,ICAM1
IL9		cytokine			0.0115	BCL3,CCL20
QKI		other			0.0115	GPM6B,VCAM1
TLR5		transmembrane receptor			0.0115	CCL20,ICAM1
cilostazol		chemical drug			0.0115	ICAM1,VCAM1
mevalonic acid		chemical - endogenous mammalian			0.0115	ICAM1,VCAM1
parthenolide		chemical drug			0.0115	ANKRD1,VCAM1
tempol		chemical drug			0.0115	ICAM1,VCAM1
FOXO4		transcription regulator			0.0118	CDKN1A,GADD45B,VCAM1
filgrastim		biologic drug		-1.698	0.0118	BIRC3,DDAH2,NFKBIE,RELB,S100A10,ZFP36L1
PRKAA2		kinase			0.0121	CDKN1A,NFKBIA,ZFP36L1
peptidoglycan		chemical - endogenous non-mammalian			0.0121	CCL20,CXCL16,ICAM1
CYLD		transcription regulator			0.0121	NFKB2,RELB
JAG2		growth factor			0.0121	C3,CCL20
SAA		group			0.0121	ICAM1,VCAM1
SERPINE2		other			0.0121	CCL20,LTB
TFAP4		transcription regulator			0.0121	CDKN1A,CLDN4
ethionine		chemical toxicant			0.0121	S100A10,TNFRSF12A
mir-22		microrna			0.0121	CDKN1A,TP53INP1
paricalcitol		chemical drug			0.0121	ICAM1,VCAM1
NFATC2		transcription regulator			0.0123	CASP4,CDKN1A,NFKBIA,RELB
IL15		cytokine			0.0123	CDKN1A,FKBP1A,NFKBIA,PTP4A1,VCAM1,ZFP36L1
EIF4E		translation regulator	Activated	2	0.0125	CDKN1A,CXCL16,NFKBIA,TAPBP
atorvastatin		chemical drug		-0.509	0.0125	GADD45B,ICAM1,RHOB,VCAM1
SYK		kinase			0.0126	BIRC3,ICAM1,TP53INP1
TRIM24		transcription regulator			0.0126	Gm12854/S100a11,IFNGR1,SAMD9L
mir-1		microrna			0.0126	ANXA2,LASP1,ZFP36L1
DACH1		transcription regulator			0.0127	CDKN1A,PAK3
LATS2		kinase			0.0127	CDKN1A,CLDN4
NOX4		enzyme			0.0127	CDKN1A,ICAM1
pimagedine		chemical drug			0.0127	GADD45B,ICAM1
(+)-R-3-(4-chlorophenyl)-3-(1-hydroxymethylcyclopropylmethoxy)-2-(4-nitrobenzyl)-2,3-dihydroisoindol-1-one		chemical reagent			0.0128	CDKN1A
(diaminocyclohexane)(diacetato)(dichloro)platinum		chemical reagent			0.0128	CDKN1A
10-decarbamoylmitomycin C		chemical toxicant			0.0128	CDKN1A
5,10,15,20-tetrakis(4-sulfonatophenyl)porphyrinato iron (III)		chemical reagent			0.0128	ICAM1
8-butyl-10-[(3-methoxy-5-pyrrol-2-ylidenepyrrol-2-ylidene)methyl]-11-azabicyclo[7.2.1]dodeca-1(12),9-diene		chemical reagent			0.0128	CDKN1A
AMOT		other			0.0128	ANKRD1
AMOTL1		other			0.0128	ANKRD1
AP2A2		transporter			0.0128	CDKN1A
ARF4		enzyme			0.0128	CLDN4
ARHGAP1		other			0.0128	CDKN1A
BUB3		other			0.0128	CDKN1A
C20-D3-vitamin A		chemical drug			0.0128	C3
CASP7		peptidase			0.0128	CASP4
CLCN3		ion channel			0.0128	VCAM1
CTBP1-DT		other			0.0128	CDKN1A
CUL4A		other			0.0128	CDKN1A
CYTH1		other			0.0128	ARF6
EID2		other			0.0128	CDKN1A
ELL		transcription regulator			0.0128	CDKN1A
ELOA		transcription regulator			0.0128	CDKN1A
ERC1		other			0.0128	NFKBIA
EXOC3L1		other			0.0128	CDKN1A
Ewsr1		other			0.0128	LMNA
FKHR		group			0.0128	VCAM1
Gd3+		chemical - endogenous mammalian			0.0128	VCAM1
H. carbonum toxin		biologic drug			0.0128	CDKN1A
HES6		transcription regulator			0.0128	CDKN1A
HSPB3		other			0.0128	ICAM1
IGF receptor		group			0.0128	ICAM1
IL20RA		transmembrane receptor			0.0128	ICAM1
KDM4D		enzyme			0.0128	CDKN1A
KLF16		transcription regulator			0.0128	CDKN1A
KLHL21		other			0.0128	NFKBIA
KRT5		other			0.0128	ICAM1
MADD		other			0.0128	MLPH
MCRS1		other			0.0128	CDKN1A
MLN8054		chemical drug			0.0128	CDKN1A
Miat		other			0.0128	ICAM1
Mn2+		chemical - endogenous mammalian			0.0128	ICAM1
N4BP2L2		transcription regulator			0.0128	CDKN1A
N6-carboxymethyl-lysine bovine serum albumin		chemical reagent			0.0128	CCL20
NAB1		transcription regulator			0.0128	IFNGR1
NLRP10		other			0.0128	TNIP1
NSC 644221		chemical reagent			0.0128	CDKN1A
O-(chloroacetylcarbamoyl)fumagillol		chemical drug			0.0128	CDKN1A
ODN-BW006		chemical reagent			0.0128	ICAM1
OLA1		enzyme			0.0128	CDKN1A
PBK		kinase			0.0128	BIRC3
PDZD2		other			0.0128	CDKN1A
PMEPA1	0.057	other			0.0128	CDKN1A
PRDX4		enzyme			0.0128	ICAM1
PSMD14		peptidase			0.0128	BCL3
PTPMT1		phosphatase			0.0128	CDKN1A
RACGAP1		transporter			0.0128	CDKN1A
RASSF7		other			0.0128	CDKN1A
RFFL		enzyme			0.0128	CDKN1A
RHOBTB2		enzyme			0.0128	CDKN1A
RNF144B		enzyme			0.0128	CDKN1A
SLC3A2		transporter			0.0128	ANKRD1
SPAG9		other			0.0128	CDKN1A
SRCAP		transcription regulator			0.0128	CDKN1A
SYF2		other			0.0128	CDKN1A
SYUIQ-5		chemical reagent			0.0128	CDKN1A
TCP1		other			0.0128	CDKN1A
TERF1		transcription regulator			0.0128	CDKN1A
TFIIH		complex			0.0128	CDKN1A
TRERF1		transcription regulator			0.0128	CDKN1A
TTC5		other			0.0128	CDKN1A
U2AF2		other			0.0128	CDKN1A
UIMC1		other			0.0128	CDKN1A
WDR82		other			0.0128	CDKN1A
YARS1		enzyme			0.0128	NFKBIA
YEATS4		transcription regulator			0.0128	CDKN1A
ZNF346		other			0.0128	CDKN1A
ZNF451		enzyme			0.0128	CDKN1A
albendazole		chemical drug			0.0128	ICAM1
anastrozole		chemical drug			0.0128	VCAM1
atosiban		biologic drug			0.0128	CDKN1A
beryllium sulfate		chemical toxicant			0.0128	CDKN1A
beta2 adrenergic receptor agonist		chemical drug			0.0128	CDKN1A
bongkrekic acid		chemical toxicant			0.0128	VCAM1
celiprolol		chemical drug			0.0128	DYNLL1
dephostatin		chemical reagent			0.0128	CDKN1A
ergosterol-5,8-peroxide		chemical - endogenous mammalian			0.0128	VCAM1
iCRT14		chemical reagent			0.0128	CD47
idronoxil		chemical drug			0.0128	CDKN1A
isoleucine		chemical - endogenous mammalian			0.0128	CDKN1A
mercaptosteroid 4		chemical reagent			0.0128	CCL20
mercaptosteroid 6		chemical reagent			0.0128	CCL20
minodronate		chemical drug			0.0128	ICAM1
moxestrol		chemical toxicant			0.0128	SERPINB9
mycophenolate mofetil		chemical drug			0.0128	ICAM1
myristoylated PKCzeta pseudosubstrate peptide inhibitor		chemical - kinase inhibitor			0.0128	VCAM1
nordihydrocapsiate		chemical reagent			0.0128	ICAM1
ofloxacin		chemical drug			0.0128	CDKN1A
palmitoylcarnitine		chemical - endogenous mammalian			0.0128	CLDN4
prostratin		chemical - endogenous non-mammalian			0.0128	ICAM1
raffinose		chemical - endogenous mammalian			0.0128	ICAM1
salsalate		chemical drug			0.0128	NFKBIA
singlet oxygen		chemical - endogenous mammalian			0.0128	ICAM1
sodium iodide		chemical drug			0.0128	ICAM1
ATP		chemical - endogenous mammalian			0.0129	FLNA,ICAM1,VCAM1
NFE2L2		transcription regulator		-0.6	0.0132	CCL20,CDKN1A,DYNLL1,ICAM1,LMNA,VCAM1
F7		peptidase			0.0133	ICAM1,VCAM1
PP1		chemical - kinase inhibitor			0.0133	CXCL16,VCAM1
RCE1		peptidase			0.0133	LMNA,TGFB2
TNIP1	0.059	other			0.0133	CCL20,RELB
benzyl isothiocyanate		chemical - endogenous non-mammalian			0.0133	ICAM1,VCAM1
eflornithine		chemical drug			0.0133	C3,CDKN1A
propranolol		chemical drug			0.0133	ICAM1,NFKBIA
BDNF		growth factor		0.447	0.0136	ANXA2,CDKN1A,FLNA,S100A10,TGFB2
BTK		kinase			0.0136	CDKN1A,NFKB2,RELB
RAC1		enzyme			0.0139	ANKRD1,ICAM1,VCAM1
Tlr		group			0.0139	CASP4,ICAM1,NFKBIA
Jnk		group		1.507	0.0139	BIRC3,ICAM1,TNFRSF12A,VCAM1
CSF1R		kinase			0.0139	CDKN1A,VCAM1
HOXC6		transcription regulator			0.0139	NFKB2,VCAM1
SAHM1		chemical reagent			0.0139	FLNA,VARS1
DDIT3		transcription regulator			0.0142	ANKRD1,CASP4,TGFB2
1,4-bis[2-(3,5-dichloropyridyloxy)]benzene		chemical toxicant			0.0145	CDKN1A,GADD45B,ICAM1
PTP4A1	0.122	phosphatase			0.0145	AARS1,FKBP1A,FLNA
HBB		transporter			0.0146	ICAM1,VCAM1
Laminin (complex)		complex			0.0146	BIRC3,TGFB2
SELPLG		other			0.0146	CDKN1A,SERPINB9
ouabain		chemical drug			0.0146	CDKN1A,YWHAH
NKX2-3		transcription regulator		0.201	0.015	CDKN1A,CXCL16,SAMD9L,VCAM1
Tcf7		transcription regulator		0	0.015	IFNGR1,OSBPL3,STX11,ZC3H12D
ANGPT1		growth factor			0.0152	ICAM1,VCAM1
Collagen type II		complex			0.0152	CCL20,RRAS
NAMPT		cytokine			0.0152	CCL20,TGFB2
TNC		other			0.0152	CCL20,CDKN1A
U73122		chemical reagent			0.0152	ICAM1,VCAM1
ZNF106		other			0.0152	C3,TNFRSF12A
baicalein		chemical drug			0.0152	ICAM1,VCAM1
ETS1		transcription regulator			0.0155	CDKN1A,ICAM1,LTB,TGFB2
MIF		cytokine			0.0159	CXCL16,ICAM1,VCAM1
SRC		kinase			0.0159	CDKN1A,ICAM1,VCAM1
CALR		transcription regulator			0.0159	CDKN1A,ICAM1
Collagen(s)		complex			0.0159	BCL3,C3
DLL4		other			0.0159	NFKB2,RELB
GPX1		enzyme			0.0159	ICAM1,VCAM1
RBM5		other			0.0159	BIRC3,ICAM1
TXNIP		other			0.0159	CDKN1A,ICAM1
dimethylnitrosamine		chemical toxicant			0.0159	CDKN1A,ICAM1
NR1H3		ligand-dependent nuclear receptor			0.0159	CD47,CDKN1A,CXCL16,NFKBIA
AGN194204		chemical drug		1.941	0.0162	ANXA2,CDKN1A,CLIC4,LMNA
C5		cytokine			0.0162	ICAM1,NFKBIA,VCAM1
IFNGR1	0.137	transmembrane receptor			0.0166	CCL20,ICAM1
IL12A		cytokine			0.0166	ICAM1,VCAM1
VitaminD3-VDR-RXR		complex			0.0166	CDKN1A,TGFB2
hexamethylene bisacetamide		chemical reagent			0.0166	CDKN1A,DDX21
temozolomide		chemical drug			0.0166	CDKN1A,NFKBIA
SOX2		transcription regulator		-0.115	0.0166	CDKN1A,DPY30,GADD45B,INPPL1,NFKB2,TGFB2
TGM2		enzyme		1.982	0.0169	BIRC3,C3,SAMD9L,TNIP1
tanespimycin		chemical drug			0.0169	BIRC3,CDKN1A,HNRNPAB
1,1-diethyl-2-hydroxy-2-nitrosohydrazine		chemical toxicant			0.017	NFKBIA
6-dimethylaminopurine		chemical - endogenous mammalian			0.017	ICAM1
AMOTL2		other			0.017	ANKRD1
ANXA5		transporter			0.017	CDKN1A
APOC3		transporter			0.017	VCAM1
BOP1		other			0.017	CDKN1A
C25-140		chemical reagent			0.017	ICAM1
CALCR		g-protein coupled receptor			0.017	CDKN1A
CDCA2		other			0.017	CDKN1A
CELA2A		peptidase			0.017	CDKN1A
CFL1		other			0.017	ICAM1
CINP		other			0.017	CDKN1A
COL1A2		other			0.017	CDKN1A
CRLF1		other			0.017	ICAM1
CSTB		peptidase			0.017	CASP4
Carlr		other			0.017	NFKB2
Casein		group			0.017	ICAM1
DNAJB4		other			0.017	CDKN1A
EEF2K		kinase			0.017	CDKN1A
GNL3L		other			0.017	CDKN1A
GRPR		g-protein coupled receptor			0.017	CDKN1A
H3-3A/H3-3B		other			0.017	CDKN1A
HAS3		enzyme			0.017	CDKN1A
HSPB6		other			0.017	ICAM1
IL17B		cytokine			0.017	CDKN1A
K Channel		complex			0.017	CDKN1A
KLF7		transcription regulator			0.017	CDKN1A
L-alanine		chemical - endogenous mammalian			0.017	CDKN1A
L-asparagine		chemical - endogenous mammalian			0.017	CDKN1A
LETMD1		other			0.017	CDKN1A
MUCL1		other			0.017	CDKN1A
N-butyldeoxynojirimycin		chemical drug			0.017	ICAM1
NBN		other			0.017	CDKN1A
NCF2		enzyme			0.017	VCAM1
NEK2		kinase			0.017	CDKN1A
NOC2L		transcription regulator			0.017	CDKN1A
NPLOC4		other			0.017	NFKB2
P-TEFb		complex			0.017	CDKN1A
P2RY6		g-protein coupled receptor			0.017	VCAM1
PIEZO1		ion channel			0.017	VCAM1
PLAC8		other			0.017	CDKN1A
PLK3		kinase			0.017	CDKN1A
Phe-Pro-Arg-chloromethyl ketone		chemical - protease inhibitor			0.017	ICAM1
Ro 25-6760		chemical toxicant			0.017	CDKN1A
S100A11		other			0.017	CDKN1A
SERPINB7		other			0.017	ICAM1
SLC13A5		transporter			0.017	CDKN1A
SMAD1/5/9		group			0.017	CDKN1A
SNHG1		other			0.017	CDKN1A
SYNM		other			0.017	CDKN1A
TOP3A		enzyme			0.017	CDKN1A
TOPORS		enzyme			0.017	CDKN1A
TR-RXR		complex			0.017	BCL3
UFD1		peptidase			0.017	NFKB2
USP28		peptidase			0.017	CDKN1A
VLDL		complex			0.017	VCAM1
WARS1		enzyme			0.017	NFKBIA
aluminum hydroxide		chemical drug			0.017	ICAM1
apicularen A		chemical reagent			0.017	NFKBIA
azurin 50-77		biologic drug			0.017	CDKN1A
benfur		chemical reagent			0.017	CDKN1A
cathepsin L inhibitor		chemical drug			0.017	C3
chondroitin sulfate B		chemical - endogenous mammalian			0.017	ICAM1
colfosceril palmitate		chemical - endogenous mammalian			0.017	ICAM1
danusertib		chemical drug			0.017	CDKN1A
darbepoetin alfa		biologic drug			0.017	ICAM1
farnesyltransferase inhibitor		chemical drug			0.017	CDKN1A
galangin		chemical - endogenous non-mammalian			0.017	ICAM1
inecalcitol		chemical drug			0.017	CDKN1A
miR-330-5p (and other miRNAs w/seed CUCUGGG)		mature microrna			0.017	CD47
mir-455		microrna			0.017	CACUL1
p38 MAP kinase inhibitor		chemical drug			0.017	CDKN1A
pyocyanin		chemical reagent			0.017	ICAM1
ribose		chemical - endogenous mammalian			0.017	ICAM1
tetrahydrocurcumin		chemical - endogenous mammalian			0.017	CDKN1A
thymeleatoxin		chemical toxicant			0.017	CDKN1A
tipifarnib		chemical drug			0.017	CDKN1A
tirapazamine		chemical drug			0.017	CDKN1A
tozasertib		chemical drug			0.017	CDKN1A
SPHK1		kinase			0.0173	BIRC3,CDKN1A
IRF2		transcription regulator			0.0176	CDKN1A,TAPBP,VCAM1
RUNX3		transcription regulator			0.0176	CDKN1A,FLNA,TGFB2
ITGB2		transmembrane receptor			0.018	GADD45B,VCAM1
NOS3		enzyme			0.018	ICAM1,VCAM1
OLR1		transmembrane receptor			0.018	ICAM1,VCAM1
PPRC1		transcription regulator			0.018	CCL20,ZFP36L1
TMPRSS2-ERG		fusion gene/product			0.018	CHAC1,LTB,SAMD9L
IL1RN		cytokine			0.0183	CCL20,CHAC1,ICAM1
ADCYAP1		other		0	0.0186	NFKBIA,RHOB,S100A10,TGFB2
CD86		transmembrane receptor			0.0187	ICAM1,NFKBIA
IL11RA		transmembrane receptor			0.0187	CCL20,ICAM1
SCARB1		transporter			0.0187	ICAM1,VCAM1
FGFR2		kinase			0.0191	CDKN1A,ICAM1,VCAM1
VDR		transcription regulator			0.0192	CDKN1A,ICAM1,RELB,TGFB2
PNPT1		enzyme			0.0194	CDKN1A,SAMD9L
RETN		other			0.0194	ICAM1,VCAM1
actinomycin D		biologic drug		0.399	0.0197	BIRC3,CDKN1A,FLNA,IFNGR1
CTCF		transcription regulator			0.0199	CDKN1A,NFKB2,TNFRSF12A
8-chlorophenylthio-adenosine 3',5'-cyclic monophosphate		chemical - kinase inhibitor			0.0201	BIRC3,CDKN1A
IFNA4		cytokine			0.0201	CLIC4,PMEPA1
ROCK2		kinase			0.0201	ICAM1,VCAM1
TSC22D3		transcription regulator			0.0201	CDKN1A,ICAM1
HDAC4		transcription regulator			0.0203	CDKN1A,TNFRSF12A,VCAM1
CG		complex	Activated	2.204	0.0203	CDKN1A,ICAM1,S100A10,TGFB2,TNFRSF12A
APC		enzyme			0.0206	ADGRV1,CDKN1A,TNFRSF12A
IDH1		enzyme			0.0209	CD47,TGFB2
SRC (family)		group			0.0209	ICAM1,VCAM1
carrageenan		chemical drug			0.0209	ICAM1,NFKBIA
panobinostat		chemical drug			0.0209	CDKN1A,FLNA
IL22		cytokine			0.021	BCL3,C3,CCL20
ALDH3A1		enzyme			0.0212	CDKN1A
BCAR3		other			0.0212	RRAS
BCAS2		other			0.0212	CDKN1A
BPI		transporter			0.0212	ICAM1
BRCA2		transcription regulator			0.0212	CDKN1A
BRF1		transcription regulator			0.0212	CDKN1A
C9orf116		other			0.0212	CDKN1A
CDH13		other			0.0212	CDKN1A
CSF		group			0.0212	C3
Cox5b		other			0.0212	TGFB2
DESI2		enzyme			0.0212	CDKN1A
DGKE		kinase			0.0212	ICAM1
ERN2		kinase			0.0212	ICAM1
Erm		group			0.0212	ICAM1
FLOT1		other			0.0212	CDKN1A
FT671		chemical - protease inhibitor			0.0212	CDKN1A
GNL2		enzyme			0.0212	CDKN1A
HTR4		g-protein coupled receptor			0.0212	VCAM1
Ho		group			0.0212	ICAM1
L-alpha-lysophosphatidylcholine, palmitoyl		chemical - endogenous mammalian			0.0212	ICAM1
L-aspartic acid		chemical - endogenous mammalian			0.0212	CDKN1A
LUCAT1		other			0.0212	CDKN1A
MAP4K1		kinase			0.0212	BIRC3
MARCHF3		other			0.0212	NFKBIA
MELK		kinase			0.0212	CDKN1A
MPO		enzyme			0.0212	VCAM1
PCA3		other			0.0212	PMEPA1
PPP1R13B		phosphatase			0.0212	CDKN1A
PSAP		enzyme			0.0212	BIRC3
PYHIN1		other			0.0212	CDKN1A
RHOH		enzyme			0.0212	CDKN1A
RNF34		enzyme			0.0212	CDKN1A
RPS3		enzyme			0.0212	NFKBIA
RSU1		other			0.0212	CDKN1A
SENP6		peptidase			0.0212	ICAM1
SLU7		enzyme			0.0212	CDKN1A
SRSF6		other			0.0212	LMNA
TACC3		other			0.0212	CDKN1A
TPPP2		other			0.0212	CDKN1A
TYMS		enzyme			0.0212	CDKN1A
Tmsb4x (includes others)		other			0.0212	ICAM1
WNT16		other			0.0212	CDKN1A
benidipine		chemical drug			0.0212	CDKN1A
beta-sitosterol		chemical reagent			0.0212	VCAM1
cannabinoid drugs		chemical drug			0.0212	ICAM1
dibutyryl cGMP		chemical reagent			0.0212	VCAM1
dimaprit		chemical drug			0.0212	ICAM1
famotidine		chemical drug			0.0212	ICAM1
geraniol		chemical - endogenous non-mammalian			0.0212	CDKN1A
inositol		chemical drug			0.0212	PAM
mevalonolactone		chemical reagent			0.0212	ICAM1
olmesartan		chemical drug			0.0212	ICAM1
plevitrexed		chemical drug			0.0212	CDKN1A
silicon phthalocyanine		chemical drug			0.0212	CDKN1A
teniposide		chemical drug			0.0212	CDKN1A
vinyl carbamate		chemical toxicant			0.0212	CDKN1A
ADM		other			0.0217	ICAM1,VCAM1
ITGB1		transmembrane receptor			0.0219	CDKN1A,FLNA,ICAM1
MYOD1		transcription regulator			0.0222	ANKRD1,CDKN1A,PMEPA1,RRAS
AKT2		kinase			0.0224	CDKN1A,NFKB2
LMNB1		other			0.0224	LMNA,TGFB2
LPL		enzyme			0.0224	ICAM1,VCAM1
MMP1		peptidase			0.0224	CDKN1A,NFKBIA
iron		chemical - endogenous mammalian			0.0224	CDKN1A,GADD45B
IRF8		transcription regulator			0.0227	CDKN1A,CXCL16,ICAM1
SOCS1		other			0.0227	CDKN1A,ICAM1,VCAM1
methylselenic acid		chemical reagent			0.0231	BIRC3,CDKN1A,DYNLL1,RHOB
TET2		enzyme			0.0231	ANXA2,BCL3,LHFPL6
CAT		enzyme			0.0232	CDKN1A,VCAM1
CDK9		kinase			0.0232	CDKN1A,NFKBIA
FOSL2		transcription regulator			0.0232	Gm12854/S100a11,RELB
HDL		complex			0.0232	ICAM1,VCAM1
ICAM1	0.043	transmembrane receptor			0.0232	ICAM1,VCAM1
MOG		other			0.0232	ICAM1,VCAM1
carbonyl cyanide m-chlorophenyl hydrazone		chemical toxicant			0.0232	CCL20,ZFP36L1
oblimersen		biologic drug			0.0232	CDKN1A,GADD45B
HDAC2		transcription regulator			0.0235	CDKN1A,NFKBIA,RHOB
CAV1		transmembrane receptor			0.024	CDKN1A,ICAM1,VCAM1
CDK4		kinase			0.024	CDKN1A,PTBP3,TP53INP1
triptolide		chemical drug			0.024	CDKN1A,ICAM1,SERPINB9
D-glucose		chemical - endogenous mammalian		0.833	0.0241	AARS1,C3,CCL20,CDKN1A,ICAM1,RELB,VCAM1
TERT		enzyme			0.0244	CDKN1A,ICAM1,NFKBIA
Pln		other			0.0248	ANXA2,RRAS
S-nitroso-N-acetyl-DL-penicillamine		chemical reagent			0.0248	CDKN1A,S100A10
bicuculline		chemical - endogenous non-mammalian			0.0248	GADD45B,TGFB2
glucagon		biologic drug			0.0248	LMNA,ST14
mir-24		microrna			0.0248	CDKN1A,IFNGR1
IFN Beta		group			0.0248	CASP4,CDKN1A,TAPBP
IL27		cytokine			0.0248	CCL20,ICAM1,VCAM1
lovastatin		chemical drug			0.0248	CDKN1A,LMNA,RHOB
PRDM1		transcription regulator			0.0252	CCL20,RASL10A,ST14,TAPBP
3-hydroxyanthranilic acid		chemical - endogenous mammalian			0.0254	VCAM1
8-hydroxyguanine		chemical - endogenous mammalian			0.0254	CCL20
AATF		transcription regulator			0.0254	CDKN1A
AMBN		growth factor			0.0254	CDKN1A
AMER1		other			0.0254	CDKN1A
BCL2L12		other			0.0254	CDKN1A
BPIFB1		other			0.0254	NFKBIA
CCL15		cytokine			0.0254	ICAM1
CCN6		growth factor			0.0254	ICAM1
CIMO		chemical reagent			0.0254	ICAM1
CLEC4M		other			0.0254	C3
CR1		transmembrane receptor			0.0254	C3
CV 3988		chemical reagent			0.0254	ICAM1
CXXC4		other			0.0254	CDKN1A
Cobra Venom Factor		chemical - endogenous non-mammalian			0.0254	TGFB2
Congo Red		chemical toxicant			0.0254	C3
DYNLL1	0.16	other			0.0254	CDKN1A
ECT2		other			0.0254	CDKN1A
EIF5A		translation regulator			0.0254	CDKN1A
ERCC1		enzyme			0.0254	CDKN1A
F Actin		complex			0.0254	FLNA
FGF13		growth factor			0.0254	CDKN1A
FSTL3		other			0.0254	CDKN1A
GPIIB-IIIA		complex			0.0254	BCL3
HSPB2		other			0.0254	ICAM1
JWH-015		chemical reagent			0.0254	ICAM1
KAT7		enzyme			0.0254	CDKN1A
KLF17		transcription regulator			0.0254	CDKN1A
LDL-cholesterol		complex			0.0254	ICAM1
LIMS2		other			0.0254	CTNNA1
LRRC26		ion channel			0.0254	LTB
MAGED1		transcription regulator			0.0254	CDKN1A
MIA-313		chemical reagent			0.0254	NFKB2
MIA-459		chemical reagent			0.0254	NFKB2
MKI67		other			0.0254	CDKN1A
MOV10L1		enzyme			0.0254	CDKN1A
NFE2L3		transcription regulator			0.0254	CDKN1A
OTUD7B		peptidase			0.0254	ICAM1
PAXIP1		other			0.0254	CDKN1A
PEBP4		other			0.0254	CDKN1A
PK11007		chemical reagent			0.0254	CDKN1A
PLSCR1		enzyme			0.0254	CDKN1A
PRKAR2A		kinase			0.0254	CDKN1A
RALB		enzyme			0.0254	CDKN1A
RAP1A		enzyme			0.0254	CDKN1A
RASSF3		other			0.0254	CDKN1A
RNF111		enzyme			0.0254	PMEPA1
SF1		transcription regulator			0.0254	ICAM1
SH2B3		other			0.0254	VCAM1
SMARCD1		transcription regulator			0.0254	CDKN1A
SOX18		transcription regulator			0.0254	VCAM1
STK38		kinase			0.0254	CCL20
TADA3		transcription regulator			0.0254	CDKN1A
TFPI		other			0.0254	CDKN1A
TRPC3		ion channel			0.0254	VCAM1
TRPM7		kinase			0.0254	VCAM1
USP11		peptidase			0.0254	CDKN1A
WRN		enzyme			0.0254	CDKN1A
XCT790		chemical reagent			0.0254	CDKN1A
ZFA-fmk		chemical reagent			0.0254	C3
ambroxol		chemical drug			0.0254	ICAM1
apamin		chemical toxicant			0.0254	VCAM1
betaxolol		chemical drug			0.0254	VCAM1
chloramphenicol		chemical drug			0.0254	CDKN1A
curcuminoids		chemical drug			0.0254	ICAM1
dibenzoylmethane		chemical toxicant			0.0254	CDKN1A
exisulind		chemical drug			0.0254	CDKN1A
ganciclovir		chemical drug			0.0254	CDKN1A
gelam honey		chemical reagent			0.0254	NFKBIA
malondialdehyde		chemical toxicant			0.0254	CDKN1A
nitrite		chemical - endogenous mammalian			0.0254	ICAM1
nomilin		chemical - endogenous non-mammalian			0.0254	CDKN1A
peptide T		biologic drug			0.0254	ICAM1
saquinavir		chemical drug			0.0254	NFKBIA
sparfosic acid		chemical drug			0.0254	CDKN1A
APOA1		transporter			0.0256	ICAM1,VCAM1
CD14		transmembrane receptor			0.0256	ICAM1,VCAM1
GPER1		g-protein coupled receptor			0.0256	CDKN1A,NFKBIA
N-methyl-D-aspartate		chemical drug			0.0256	C3,CD47
POU2AF1		transcription regulator			0.0256	CTNNA1,S100A10
trichloroethylene		chemical toxicant			0.0256	CD47,RHOB
NCOA1		transcription regulator			0.0257	C3,CDKN1A,NFKBIA
Notch		group			0.0257	ANKRD1,CDKN1A,GADD45B
Histone h4		group			0.0262	CDKN1A,ICAM1,VCAM1
IL12B		cytokine			0.0264	ICAM1,VCAM1
CREBBP		transcription regulator			0.0271	CDKN1A,NFKBIA,PDLIM4,TAPBP,VCAM1
PTGES		enzyme			0.0273	ANXA2,CDKN1A
mir-181		microrna			0.0273	ICAM1,VCAM1
thioctic acid		chemical drug			0.0273	ICAM1,VCAM1
H89		chemical - kinase inhibitor			0.0275	CDKN1A,NFKBIA,VCAM1
fenofibrate		chemical drug		0	0.0278	CASP4,ICAM1,TP53INP1,VCAM1
CXCR4		g-protein coupled receptor			0.0281	CDKN1A,RRAS
N-acetylmuramyl-L-alanyl-D-isoglutamine		chemical - endogenous non-mammalian			0.0281	ICAM1,NFKBIA
STUB1		enzyme			0.0281	CDKN1A,NFKB2
mitomycin C		chemical drug			0.0281	CDKN1A,TP53INP1
vitamin D		chemical drug			0.0281	CDKN1A,NFKBIA
Ca2+		chemical - endogenous mammalian		1.103	0.0284	CDKN1A,ICAM1,NFKBIA,VCAM1
MAP3K8		kinase			0.0285	BIRC3,CCL20,IFNGR1
CDKN1A	0.045	kinase		0.235	0.0288	CDKN1A,CLIC4,IFNGR1,NFKBIA
C5AR1		g-protein coupled receptor			0.029	C3,TGFB2
carbon monoxide		chemical - endogenous mammalian			0.029	CDKN1A,ICAM1
seocalcitol		chemical drug			0.029	ANKRD1,CDKN1A
(6)-gingerol		chemical - endogenous non-mammalian			0.0296	CDKN1A
4-coumaric acid		chemical - endogenous mammalian			0.0296	CDKN1A
BANCR		other			0.0296	CDKN1A
BANP		other			0.0296	CDKN1A
CCNA2		other			0.0296	CDKN1A
DLC1		other			0.0296	S100A10
DMTF1		transcription regulator			0.0296	CDKN1A
ERBIN		other			0.0296	CDKN1A
FIRRE		other			0.0296	VCAM1
FKBP1A	0.079	enzyme			0.0296	CDKN1A
FKBP5		enzyme			0.0296	ICAM1
GNE		kinase			0.0296	CHAC1
Gm26313		other			0.0296	GPM6B
HNRNPR		other			0.0296	GPM6B
Hmgb2 (includes others)		transcription regulator			0.0296	NFKB2
IER3		other			0.0296	BIRC3
ISRIB		chemical reagent			0.0296	CCL20
ITGB1BP1		other			0.0296	CDKN1A
ITGB8		other			0.0296	CDKN1A
L-proline		chemical - endogenous mammalian			0.0296	CDKN1A
MED13L		other			0.0296	ANKRD1
MS4A1		other			0.0296	ZFP36L1
P2RY1		g-protein coupled receptor			0.0296	VCAM1
PCM1		other			0.0296	CDKN1A
PDE3A		enzyme			0.0296	CDKN1A
PPM1A		phosphatase			0.0296	CDKN1A
RAD9A		enzyme			0.0296	CDKN1A
RBX1		enzyme			0.0296	RHOB
RHOC		enzyme			0.0296	CDKN1A
SERPINA4		other			0.0296	VCAM1
SLC6A2		transporter			0.0296	DYNLL1
SLCO1B3		transporter			0.0296	CDKN1A
SUPT5H		transcription regulator			0.0296	CDKN1A
Sfk		group			0.0296	ICAM1
Sphk		group			0.0296	VCAM1
TRIM29		transcription regulator			0.0296	CDKN1A
ZNF652		other			0.0296	TGFB2
alloxan		chemical reagent			0.0296	ICAM1
cyclosporin		biologic drug			0.0296	ICAM1
dacarbazine		chemical drug			0.0296	CDKN1A
eugenol		chemical - endogenous non-mammalian			0.0296	CDKN1A
glyceraldehyde-BSA		chemical reagent			0.0296	CDKN1A
leucovorin		chemical - endogenous mammalian			0.0296	CDKN1A
methylglyoxal-BSA		chemical reagent			0.0296	CDKN1A
perifosine		chemical drug			0.0296	CDKN1A
pervanadate		chemical reagent			0.0296	NFKBIA
rabeprazole		chemical drug			0.0296	ICAM1
sotrastaurin		chemical drug			0.0296	NFKBIA
thenoyltrifluoroacetone		chemical reagent			0.0296	BIRC3
triamcinolone hexacetonide		chemical drug			0.0296	ICAM1
tyrphostin AG825		chemical - kinase inhibitor			0.0296	CDKN1A
valine		chemical - endogenous mammalian			0.0296	CDKN1A
FSH		complex			0.0297	CASP4,PPP2R1A,PTP4A1,RHOB,TGFB2
IL25		cytokine			0.0299	F11R,ZFP36L1
rotenone		chemical toxicant			0.0299	BIRC3,VCAM1
sodium arsenite		chemical drug			0.0299	CDKN1A,GADD45B
LEF1		transcription regulator			0.0299	CDKN1A,STX11,ZC3H12D
medroxyprogesterone acetate		chemical drug			0.0304	ICAM1,LMNA,LTB
BCL11B		transcription regulator			0.0307	CDKN1A,LTB
MMP12		peptidase			0.0307	NFKBIA,YWHAH
PLN		transporter			0.0307	ANXA2,RRAS
IFNAR1		transmembrane receptor			0.0309	CCL20,IFNGR1,VCAM1
MED1		transcription regulator			0.0309	BCL3,CDKN1A,NFKBIA
bisphenol A		chemical - endogenous mammalian			0.0309	C3,CDKN1A,F11R
CST5		other		-1	0.0312	ANXA2,ARF6,DDX21,VARS1
25-hydroxycholesterol		chemical reagent			0.0316	CHAC1,NFKBIA
BMI1		transcription regulator			0.0316	CDKN1A,SFN
CUX1		transcription regulator			0.0316	CDKN1A,FLNA
FOXL2		transcription regulator			0.0316	CCL20,ICAM1
SNAI2		transcription regulator			0.0316	ANKRD1,CDKN1A
folic acid		chemical - endogenous mammalian			0.0316	CDKN1A,VCAM1
oxaliplatin		chemical drug			0.0316	ANXA2,CDKN1A
methylmercury		chemical toxicant			0.0325	CD47,RHOB
HDAC1		transcription regulator			0.0326	CDKN1A,NFKBIA,RELB,RHOB
GATA2		transcription regulator		0.277	0.0328	ADGRE5,CDKN1A,ICAM1,Serpinb6b,VCAM1
POLR2A		enzyme			0.0334	CDKN1A,NFKBIA
SHC1		other			0.0334	CDKN1A,ICAM1
TBP		transcription regulator			0.0334	CDKN1A,NFKBIA
glutathione		chemical - endogenous mammalian			0.0334	CDKN1A,VCAM1
vitamin E		chemical drug			0.0334	CDKN1A,VCAM1
2,5-bis(5-hydroxymethyl-2-thienyl)furan		chemical reagent			0.0337	CDKN1A
3-deazaadenosine		chemical reagent			0.0337	CDKN1A
AGI-1067		chemical drug			0.0337	VCAM1
BAG6		enzyme			0.0337	CDKN1A
BLM		enzyme			0.0337	CDKN1A
CAPN2		peptidase			0.0337	PPP2R1A
CAV3		enzyme			0.0337	CDKN1A
CBX1		transcription regulator			0.0337	CDKN1A
CLTC		other			0.0337	CDKN1A
Calcineurin B		group			0.0337	CDKN1A
Cyclin A		group			0.0337	CDKN1A
DBH-AS1		other			0.0337	CDKN1A
DES		other			0.0337	ANKRD1
DNM1L		enzyme			0.0337	VCAM1
FALEC		other			0.0337	CDKN1A
FANCA		other			0.0337	CDKN1A
GCS-100		chemical drug			0.0337	CDKN1A
LTBP4		growth factor			0.0337	TGFB2
Lefty		group			0.0337	CDKN1A
MSI1		other			0.0337	CDKN1A
MTBP		other			0.0337	CDKN1A
N,N-dimethylarginine		chemical - endogenous mammalian			0.0337	ICAM1
NUAK1		kinase			0.0337	CDKN1A
P1,P4-Di(adenosine-5') tetraphosphate		chemical - endogenous mammalian			0.0337	TGFB2
PADI4		enzyme			0.0337	CDKN1A
PDZK1		other			0.0337	VCAM1
PKD2		ion channel			0.0337	CDKN1A
PLP2		transporter			0.0337	ICAM1
Retinoic acid-RAR-RXR		complex			0.0337	TGFB2
SDC2		other			0.0337	CDKN1A
SLC25A4		transporter			0.0337	BIRC3
SNW1		transcription regulator			0.0337	CDKN1A
STC1		kinase			0.0337	TGFB2
TERF2		transcription regulator			0.0337	CDKN1A
TNRC6A		other			0.0337	CDKN1A
Vhl		complex			0.0337	BIRC3
alpha-tocopherol succinate		chemical drug			0.0337	VCAM1
artemisinin		chemical drug			0.0337	CDKN1A
carnosol		chemical - endogenous non-mammalian			0.0337	ICAM1
ciclopirox olamine		chemical drug			0.0337	CDKN1A
dihematoporphyrin ether		chemical drug			0.0337	CDKN1A
ethyl 2-{[(6,7-dimethyl-3-oxo-1,2,3,4-tetrahydro-2-quinoxalinyl)acetyl]amino}-4,5-dimethyl-3-thiophenecarboxylate		chemical reagent			0.0337	CDKN1A
evofosfamide		chemical drug			0.0337	CDKN1A
immune complex		complex			0.0337	VCAM1
levofloxacin		chemical drug			0.0337	CDKN1A
magnesium sulfate		chemical drug			0.0337	NFKBIA
mir-326		microrna			0.0337	CD47
palmitoyl-Cys((RS)-2,3-di(palmitoyloxy)-propyl)-Ala-Gly-OH		chemical reagent			0.0337	ICAM1
teasaponin		chemical - endogenous non-mammalian			0.0337	NFKBIA
tectorigenin		chemical - endogenous non-mammalian			0.0337	ICAM1
tosyllysine chloromethyl ketone		chemical - protease inhibitor			0.0337	NFKBIA
miR-155-5p (miRNAs w/seed UAAUGCU)		mature microrna			0.0339	CCL20,CD47,TP53INP1
INSR		kinase			0.0343	ANKRD1,CDKN1A,NFKB2,RHOB,VCAM1
Map3k7		kinase			0.0344	NFKBIA,VCAM1
calphostin C		chemical - kinase inhibitor			0.0344	CDKN1A,ICAM1
gemcitabine		chemical drug			0.0344	CD47,CDKN1A
MYCN		transcription regulator			0.0348	ATXN2,CDKN1A,MYL12A,S100A10
Hdac		group			0.035	CDKN1A,GADD45B,HNRNPAB
LDB1		transcription regulator		-1	0.0352	CASP4,CDKN1A,CLDN4,TGFB2
CTLA4		transmembrane receptor			0.0353	ICAM1,STX11
NRF1		transcription regulator			0.0353	CCL20,CD47
PLAU		peptidase			0.0353	ICAM1,RELB
LMO2		transcription regulator		-1	0.0356	CASP4,CDKN1A,CLDN4,TGFB2
STK11		kinase		1.982	0.0356	CDKN1A,GADD45B,LTB,NFKB2
FLT3LG		cytokine			0.0362	ADGRE5,ICAM1
IGF2		growth factor			0.0366	CDKN1A,NFKBIA,RHOB
PTH		other			0.0371	CDKN1A,LMNA,ST14
ID1		transcription regulator			0.0372	CDKN1A,ICAM1
MAP2K3		kinase			0.0372	CDKN1A,ICAM1
miR-21-5p (and other miRNAs w/seed AGCUUAU)		mature microrna			0.0372	CDKN1A,TGFB2
MAPK8		kinase			0.0376	BIRC3,CDKN1A,CXCL16
1,1-bis(3'-indolyl)-1-(4-trifluoromethyl-phenyl)methane		chemical reagent			0.0378	CDKN1A
6-amino-4-(4-phenoxyphenylethylamino)quinazoline		chemical reagent			0.0378	C3
ASF1A		other			0.0378	VCAM1
ATG16L1		enzyme			0.0378	NFKBIA
Agtr1b		g-protein coupled receptor			0.0378	VCAM1
CD200R1		transmembrane receptor			0.0378	CXCL16
CD48		other			0.0378	SERPINB9
CTH		enzyme			0.0378	CDKN1A
DDB1		other			0.0378	CDKN1A
DKK3		cytokine			0.0378	WASF2
DUSP16		phosphatase			0.0378	VCAM1
DUSP6		phosphatase			0.0378	CDKN1A
GLRX		enzyme			0.0378	ICAM1
HUWE1		transcription regulator			0.0378	CDKN1A
IL12RB2		transmembrane receptor			0.0378	VCAM1
IL22RA1		transmembrane receptor			0.0378	CCL20
KRT16		other			0.0378	SFN
MB		transporter			0.0378	VCAM1
MED15		transcription regulator			0.0378	CDKN1A
NELFA		other			0.0378	CDKN1A
PI3		other			0.0378	NFKBIA
PRTN3		peptidase			0.0378	CDKN1A
RASSF6		other			0.0378	CDKN1A
RECK		other			0.0378	CDKN1A
RPL11		other			0.0378	CDKN1A
RTKN		other			0.0378	BIRC3
SHOX		transcription regulator			0.0378	CDKN1A
SLC18A2		transporter			0.0378	DYNLL1
SPTAN1		other			0.0378	CDKN1A
ST6GAL1		enzyme			0.0378	BIRC3
TIP60		complex			0.0378	CDKN1A
TMP778		chemical reagent			0.0378	CCL20
TSG101		transcription regulator			0.0378	CDKN1A
bacterial lipopolysaccharides		chemical - other			0.0378	BCL3
benazepril		chemical drug			0.0378	CDKN1A
bendamustine		chemical drug			0.0378	CDKN1A
cyclopentenone		chemical reagent			0.0378	ICAM1
flufenamic acid		chemical drug			0.0378	VCAM1
ganglioside		chemical - endogenous mammalian			0.0378	ICAM1
ganglioside GD3		chemical - endogenous mammalian			0.0378	ICAM1
geneticin		chemical toxicant			0.0378	CDKN1A
genipin		chemical - endogenous non-mammalian			0.0378	CDKN1A
iodine		chemical - endogenous mammalian			0.0378	ICAM1
ketorolac		chemical drug			0.0378	NFKBIA
miR-126a-3p (and other miRNAs w/seed CGUACCG)		mature microrna			0.0378	VCAM1
miR-182 inhibitor		chemical reagent			0.0378	NFKBIA
mir-224		microrna			0.0378	CDKN1A
nicotiflorin		chemical reagent			0.0378	ICAM1
prodigiosin		chemical toxicant			0.0378	CDKN1A
sphingosylphosphocholine		chemical - endogenous mammalian			0.0378	ICAM1
tangeretin		chemical - endogenous non-mammalian			0.0378	CDKN1A
thymidine		chemical - endogenous mammalian			0.0378	CDKN1A
EPO		cytokine			0.0379	BCL3,CDKN1A,ETF1,NFKBIA
ATM		kinase			0.0381	CDKN1A,GADD45B
ETS2		transcription regulator			0.0381	CDKN1A,ICAM1
FBXW7		enzyme			0.0381	NFKB2,RHOB
FGF7		growth factor			0.0381	CDKN1A,S100A10
GNA14		enzyme			0.0381	ANKRD1,ZFP36L1
RC3H1		enzyme			0.0381	APOBEC3B,CCL20
silibinin		chemical drug			0.0381	CDKN1A,NFKBIA
RARB		ligand-dependent nuclear receptor			0.0382	CASP4,CDKN1A,ICAM1
fluticasone propionate		chemical drug			0.0382	C3,CCL20,GADD45B
docosahexaenoic acid		chemical drug			0.0387	CDKN1A,TGFB2,VCAM1
mir-34		microrna			0.0391	BIRC3,CD47
BMP7		growth factor			0.0393	CDKN1A,F11R,ICAM1
DNMT3B		enzyme			0.0399	CDKN1A,SERPINB9,ST14
E. coli lipopolysaccharide		chemical - endogenous non-mammalian			0.0401	ICAM1,VCAM1
RNF31		enzyme			0.0401	CCL20,CXCL16
ursolic acid		chemical drug			0.0401	CDKN1A,VCAM1
EP300		transcription regulator		1.984	0.0403	CDKN1A,LMNA,NFKBIA,PDLIM4,TGFB2
RXRA		ligand-dependent nuclear receptor			0.0403	C3,CCL20,CDKN1A,TGFB2
IL21		cytokine			0.0404	CCL20,CDKN1A,NEURL3
E2F3		transcription regulator			0.041	BOK,CCL20,CDKN1A
BTNL2		transmembrane receptor			0.0411	IFNGR1,ST14
Hif1		complex			0.0411	CDKN1A,HTRA2
cadmium		chemical toxicant			0.0411	C3,CDKN1A
1L-6-hydroxymethyl-chiro-inositol 2-(R)-2-O-methyl-3-O-octadecylcarbonate		chemical - kinase inhibitor			0.042	CXCL16
2,4-dinitrobenzenesulfonic acid		chemical reagent			0.042	ICAM1
2-hydroxy-1-naphthylaldehyde isonicotinoyl hydrazone		chemical reagent			0.042	CDKN1A
6-mercaptopurine		chemical drug			0.042	VCAM1
ANG		enzyme			0.042	CDKN1A
APC/APC2		group			0.042	CDKN1A
CAMK2N2		other			0.042	CDKN1A
CAVIN1		transcription regulator			0.042	CDKN1A
COPS8		other			0.042	CDKN1A
CYBA		enzyme			0.042	CDKN1A
DAB2IP		other			0.042	CDKN1A
DPY30	0.06	other			0.042	CDKN1A
FRMD6		other			0.042	CDKN1A
FUS		transcription regulator			0.042	ICAM1
HDAC8		transcription regulator			0.042	CDKN1A
HOXA11-AS		other			0.042	CDKN1A
IL10RB		transmembrane receptor			0.042	ICAM1
IL9R		transmembrane receptor			0.042	BCL3
LCOR		transcription regulator			0.042	CDKN1A
LGALS8		other			0.042	CDKN1A
LUM		other			0.042	CDKN1A
NMNAT1		enzyme			0.042	TGFB2
O6-benzylguanine		chemical drug			0.042	CDKN1A
PARP		group			0.042	CDKN1A
PPM1D		phosphatase			0.042	CDKN1A
PRKCH		kinase			0.042	CDKN1A
PRPF19		enzyme			0.042	CDKN1A
RNASEH2B		enzyme			0.042	CDKN1A
SEMA4D		transmembrane receptor			0.042	RRAS
SIAH1		enzyme			0.042	CDKN1A
SPRY4-IT1		other			0.042	F11R
STX3		transporter			0.042	ANKRD1
TAPI-1		chemical - protease inhibitor			0.042	VCAM1
TNFRSF17		transmembrane receptor			0.042	ICAM1
TRAF1		other			0.042	NFKB2
ZGPAT		transcription regulator			0.042	VCAM1
alpha-santalol		chemical reagent			0.042	CDKN1A
belinostat		chemical drug			0.042	CDKN1A
butylhydroxybutylnitrosamine		chemical toxicant			0.042	CDKN1A
calmidazolium		chemical drug			0.042	VCAM1
levamisole		chemical drug			0.042	CDKN1A
quinidine		chemical drug			0.042	CDKN1A
tin mesoporphyrin		chemical drug			0.042	ICAM1
tiron		chemical reagent			0.042	CDKN1A
TBX2		transcription regulator			0.0421	CDKN1A,TGFB2
minocycline		chemical drug			0.0421	ICAM1,VCAM1
BRCA1		transcription regulator			0.0421	CDKN1A,GADD45B,SFN
KLF4		transcription regulator		0.251	0.0424	CDKN1A,CLIC4,TGFB2,VCAM1
LEPR		transmembrane receptor			0.0427	GADD45B,INPPL1,TP53INP1
trans-hydroxytamoxifen		chemical drug			0.0427	LMNA,SERPINB9,TGFB2
Bay 11-7082		chemical - kinase inhibitor			0.0431	ICAM1,VCAM1
LONP1		peptidase			0.0431	ANXA2,CHAC1
MAP2K6		kinase			0.0431	CDKN1A,RELB
RBL1		transcription regulator			0.0431	CASP4,CDKN1A
acetaminophen		chemical drug			0.0439	CDKN1A,ICAM1,VCAM1
ROR2		kinase			0.0441	CDKN1A,SFN
SPP1		cytokine			0.0445	CCL20,CDKN1A,ICAM1
diethylstilbestrol		chemical drug		1.019	0.0446	C3,CDKN1A,SFN,SHISA4
IL10RA		transmembrane receptor		-1	0.045	C3,PAM,Serpinb6b,SERPINB9
MAP3K7		kinase			0.0451	BIRC3,CCL20
MDM2		transcription regulator			0.0451	CDKN1A,SFN
MMP9		peptidase			0.0451	CDKN1A,ICAM1
NKX2-1		transcription regulator			0.0451	Serpinb6b,SERPINB9,TGFB2
PLX5622		chemical drug			0.0451	CCL20,LTB
TBX5		transcription regulator			0.0451	ANKRD1,CCL20
fenretinide		chemical drug			0.0451	ANKRD1,NFKBIA
thyroid hormone		chemical - endogenous mammalian			0.0451	CDKN1A,S100A10,ST14
ABCA4		transporter			0.0461	C3
APOL1		transporter			0.0461	IFNGR1
ARF6	0.019	transporter			0.0461	RHOB
ATP7A		transporter			0.0461	PAM
CELF1		translation regulator			0.0461	CDKN1A
CERS2		transcription regulator			0.0461	CDKN1A
CHRNA3		transmembrane receptor			0.0461	CDKN1A
DRD1		g-protein coupled receptor			0.0461	S100A10
FANCD2		other			0.0461	CDKN1A
Fcor		enzyme			0.0461	CDKN1A
G2535		chemical reagent			0.0461	NFKBIA
GPR132		g-protein coupled receptor			0.0461	ICAM1
Gcn5l		group			0.0461	CDKN1A
HOXA-AS2		other			0.0461	CDKN1A
IL1R2		transmembrane receptor			0.0461	CCL20
J11-Cl		chemical reagent			0.0461	CCL20
JMJD1C		enzyme			0.0461	CDKN1A
L-serine		chemical - endogenous mammalian			0.0461	CDKN1A
LINC-ROR		other			0.0461	CDKN1A
MSI2		other			0.0461	CDKN1A
Mcpt4		peptidase			0.0461	CLDN4
NCKAP1L		other			0.0461	PPP2R1A
NRBP2		kinase			0.0461	ANXA2
PBRM1		other			0.0461	CDKN1A
PIAS2		transcription regulator			0.0461	CDKN1A
PPP1R15B		phosphatase			0.0461	CHAC1
RFX2		transcription regulator			0.0461	LMNA
RLIM		enzyme			0.0461	CDKN1A
SLC7A5		transporter			0.0461	CHAC1
SNHG20		other			0.0461	CDKN1A
T 0070907		chemical reagent			0.0461	CDKN1A
TASP1		peptidase			0.0461	CDKN1A
TBX1		transcription regulator			0.0461	CDKN1A
TCF21		transcription regulator			0.0461	CDKN1A
TLR2/3/4/9		group			0.0461	ICAM1
TWIST		group			0.0461	CDKN1A
UBR5		enzyme			0.0461	CDKN1A
YOD1		enzyme			0.0461	ANKRD1
acriflavine		chemical toxicant			0.0461	CD47
adaphostin		chemical drug			0.0461	CDKN1A
astragalin		chemical - endogenous non-mammalian			0.0461	ICAM1
canrenoate potassium		chemical drug			0.0461	CDKN1A
clioquinol		chemical drug			0.0461	CDKN1A
delphinidin		chemical - endogenous non-mammalian			0.0461	ICAM1
dextran		chemical drug			0.0461	ICAM1
ferric ammonium citrate		chemical drug			0.0461	C3
meloxicam		chemical drug			0.0461	CDKN1A
mimosine		chemical drug			0.0461	CDKN1A
orlistat		chemical drug			0.0461	ICAM1
pargyline		chemical drug			0.0461	CDKN1A
sphingomyelin		chemical - endogenous mammalian			0.0461	ICAM1
teriflunomide		chemical drug			0.0461	ICAM1
tyrphostin AG 1296		chemical - kinase inhibitor			0.0461	ICAM1
zileuton		chemical drug			0.0461	ICAM1
GAST		other			0.0472	NFKBIA,VCAM1
MXD1		transcription regulator			0.0472	IFNGR1,NOP14
PPP3CA		phosphatase			0.0472	C3,CDKN1A
topotecan		chemical drug			0.0475	BCL3,C3,CDKN1A
IFN alpha/beta		group			0.0482	CXCL16,SERPINB9
MAPK14		kinase			0.0488	ANKRD1,ICAM1,VCAM1
GMNN		transcription regulator			0.0493	CDKN1A,TGFB2
TRAF2		enzyme			0.0493	BIRC3,ICAM1
spironolactone		chemical drug			0.0493	CDKN1A,ICAM1
mir-8		microrna			0.0494	CD47,CDKN1A,TGFB2

## Sheet: M30_C2vC4
© 2000-2020 QIAGEN. All rights reserved.
Upstream Regulator	Expr Log Ratio	Molecule Type	Predicted Activation State	Activation z-score	p-value of overlap	Target molecules in dataset	Mechanistic Network
PPARGC1A		transcription regulator		0.48	6.49e-05	CAT,FASN,GPC6,MSMO1,NR5A2,SEMA6A
lysophosphatidylcholine		chemical - other			0.000367	CAT,FASN,MSMO1
isoquercitrin		chemical drug			0.000378	FASN,MSMO1
caffeic acid		chemical drug			0.000432	CAT,FASN
PDX1		transcription regulator			0.000484	CAT,ELAPOR1,NR5A2,TCF7L2
USF1		transcription regulator			0.000519	CAT,FASN,PIGR
FEV		transcription regulator			0.00064	EPHA7,PROX1,TCF7L2
mir-192		microrna			0.00068	ALCAM,CTNNBIP1
edaravone		chemical drug			0.000751	CAT,FASN
BHLHE40		transcription regulator			0.000903	ATP1B1,FASN
shikonin		chemical drug			0.000983	CAT,FASN
FXR ligand-FXR-Retinoic acid-RXRα		complex			0.00107	FASN,NR5A2
HOXB13		transcription regulator			0.00144	EPHA7,LRRN1
SP4		transcription regulator			0.00144	MAT2A,PTDSS1
levodopa		chemical - endogenous mammalian		1.633	0.0018	CTNNBIP1,DAAM1,FSTL4,MAT2A,MSMO1,SYNE1
ACOT8		enzyme			0.00194	CAT
DELEC1		other			0.00194	ATP1B1
ETF1		translation regulator			0.00194	UTRN
rhapontin		chemical - endogenous non-mammalian			0.00194	FASN
HDL-cholesterol		complex			0.00234	GPC6,MSMO1
NR2F2		ligand-dependent nuclear receptor			0.00246	NR5A2,PROX1
S-adenosylmethionine		chemical - endogenous mammalian			0.00246	FASN,MAT2A
mir-19		microrna			0.00246	MSMO1,TRIM33
mibolerone		chemical drug			0.00246	ALCAM,FASN,MAT2A
AGT		growth factor		0.651	0.00258	ATP1B1,CAT,FASN,MSMO1,SEMA6A	AGT,PPARGC1A
CDK4		kinase			0.00272	GPC6,LCORL,UTRN	CCND1,CDK4
ATP7B		transporter			0.00273	FASN,MSMO1
NR0B1		ligand-dependent nuclear receptor			0.00286	FASN,NR5A2	NR0B1,NR1H3
PXR ligand-PXR-Retinoic acid-RXRα		complex			0.00314	CAT,GSTM2
tamoxifen		chemical drug		-1.067	0.00339	CAT,FASN,SYNE1,UTRN
Nr1h		group			0.00348	ATP1B1,FASN,NR5A2
DRP2		other			0.00387	UTRN
HSD17B13		enzyme			0.00387	FASN
IL3RA		transmembrane receptor			0.00387	PROX1
Mir23a/b/c		group			0.00387	SEMA6A
miR-483-5p (miRNAs w/seed AGACGGG)		mature microrna			0.00387	ALCAM
n-3 fatty acids		chemical drug			0.0039	CAT,FASN
CCND1		transcription regulator			0.00391	CTNNBIP1,GPC6,LCORL,UTRN
PML		transcription regulator			0.004	CAT,FASN,PIK3C2A
TWIST1		transcription regulator			0.00413	ALCAM,SEMA5A,SLC28A3
ADRB2		g-protein coupled receptor			0.00457	ATP1B1,FASN
SP1		transcription regulator			0.00478	CAT,FASN,MAT2A,NR5A2,PTDSS1
Am 580		chemical toxicant			0.00491	CAT,FASN
LMNB1		other			0.00491	FASN,MSMO1
FOS		transcription regulator			0.00503	APLP2,CAT,FASN,NR5A2,UTRN
TCF3		transcription regulator			0.00576	ALCAM,MSMO1,PRSS3,PTDSS1
3-hydroxybutyrate arginate		chemical reagent			0.0058	UTRN
ELOVL2		enzyme			0.0058	FASN
N-butyryl arginine		chemical reagent			0.0058	UTRN
RPL10		translation regulator			0.0058	TCF7L2
TOP2B		enzyme			0.0058	FASN
arginine butyrate		chemical drug			0.0058	UTRN
tolylfluanid		chemical toxicant			0.0058	FASN
tretinoin tocoferil		chemical reagent			0.0058	CAT
miR-1-3p (and other miRNAs w/seed GGAAUGU)		mature microrna			0.00609	RAB11FIP2,SYNE1,UTRN
RORA		ligand-dependent nuclear receptor			0.00626	ATP1B1,FASN,GSTM2
ATP5IF1		other			0.00663	CAT,FASN
USF2		transcription regulator			0.00663	FASN,PIGR
Sos		group			0.007	APLP2,CAT,UTRN
MUC1		other			0.00705	CAT,FASN
ELAVL1		other			0.00729	DCDC2,MAT2A,PIGR
birabresib		chemical drug			0.00747	EPHA7,TCF7L2
triamcinolone acetonide		chemical drug			0.00769	ATP11B,SEMA6A,TCF7L2
caffeine		chemical drug			0.00769	CAT,FASN
CCDC3		other			0.00772	FASN
GIPC1		other			0.00772	PROX1
PSME3		peptidase			0.00772	FASN
RNF139		enzyme			0.00772	FASN
SRT2183		chemical reagent			0.00772	FASN
nabumetone		chemical drug			0.00772	UTRN
SP3		transcription regulator			0.00841	MAT2A,NR5A2,PTDSS1
DMD		other			0.00852	APLP2,PROX1,UTRN
HSF1		transcription regulator			0.00873	COBL,FASN,MAT2A
PIK3CA		kinase			0.00882	ALCAM,FASN
NR1H3		ligand-dependent nuclear receptor			0.0094	CAT,FASN,NR5A2
CTNNB1		transcription regulator		-1	0.0095	ALCAM,FASN,NR5A2,SEMA5A,SEMA6A,TCF7L2
DASA-58		chemical reagent			0.00964	FASN
FA2H		enzyme			0.00964	FASN
FOXN4		transcription regulator			0.00964	PROX1
Foxe3		transcription regulator			0.00964	PROX1
GYS2		enzyme			0.00964	FASN
HU-210		chemical reagent			0.00964	FASN
RSC1A1		other			0.00964	SLC28A3
mini-GAGR		chemical reagent			0.00964	CAT
phytol		chemical - endogenous non-mammalian			0.00964	CAT
sulfadimethoxine		chemical toxicant			0.00964	GSTM2
MAPK7		kinase			0.00977	FASN,MSMO1
CYP19A1		enzyme			0.01	FASN,NR5A2
SREBF2		transcription regulator			0.0103	FASN,MSMO1
metribolone		chemical reagent			0.0104	ATP1B1,ELAPOR1,FASN,PIGR
streptozocin		chemical drug			0.0106	ATP1B1,CAT,FASN
cholesterol		chemical - endogenous mammalian			0.0107	FASN,MSMO1,SLC28A3
FLT1		kinase			0.011	APLP2,MAT2A
(S)-mevalonic acid		chemical - endogenous mammalian			0.0116	CAT
13-hydroxyoctadecadienoic acid		chemical - endogenous mammalian			0.0116	CAT
BICC1		other			0.0116	PIGR
Fructus xanthii aqueous extract		chemical - endogenous non-mammalian			0.0116	FASN
HOXD8		transcription regulator			0.0116	PROX1
Irs3		other			0.0116	FASN
LRRC26		ion channel			0.0116	PRSS3
OBP2B		transporter			0.0116	FASN
SOX18		transcription regulator			0.0116	PROX1
SSPN		other			0.0116	UTRN
WDFY2		other			0.0116	FASN
ghrelin		biologic drug			0.0116	FASN
juglone		chemical toxicant			0.0116	FASN
miR-3118 (and other miRNAs w/seed GUGACUG)		mature microrna			0.0116	NR5A2
SCAP		other			0.0118	FASN,MSMO1
L-triiodothyronine		chemical - endogenous mammalian		1.953	0.0119	ATP1B1,FASN,MSMO1,NR5A2
lenalidomide		chemical drug			0.012	SEMA5A,TCF7L2,UTRN
PPARA		ligand-dependent nuclear receptor		1.015	0.0121	CAT,FASN,MAT2A,MSMO1
NFYA		transcription regulator			0.0123	CAT,FASN
chenodeoxycholic acid		chemical - endogenous mammalian			0.0126	FASN,NR5A2
SOX2		transcription regulator		0.528	0.0134	NR5A2,SEMA5A,SEMA6A,TRIM33
2-hydroxyestradiol		chemical - endogenous mammalian			0.0135	CAT
GLP-1 (7-36) amide		biologic drug			0.0135	FASN
PDE6B		enzyme			0.0135	CAT
S-allyl-L-cysteine		chemical - endogenous non-mammalian			0.0135	FASN
glyceraldehyde-BSA		chemical reagent			0.0135	FASN
methylglyoxal-BSA		chemical reagent			0.0135	FASN
rutin		chemical toxicant			0.0135	CAT
triolein		chemical drug			0.0135	FASN
valproic acid		chemical drug	Activated	2	0.0138	CAT,MSMO1,TCF7L2,UTRN
E. coli B5 lipopolysaccharide		chemical - endogenous non-mammalian			0.014	CAT,FASN,MAT2A
bezafibrate		chemical drug			0.0149	CAT,FASN
C4BP		complex			0.0154	MSMO1
CHCHD5		other			0.0154	FASN
MEDAG		other			0.0154	FASN
PNU282987		chemical reagent			0.0154	FASN
SLC39A14		transporter			0.0154	FASN
SMN1/SMN2		other			0.0154	UTRN
SOAT1		enzyme			0.0154	FASN
THRSP		other			0.0154	FASN
miR-217-5p (and other miRNAs w/seed ACUGCAU)		mature microrna			0.0154	FASN
ETV5		transcription regulator			0.0158	ALCAM,FASN
KRAS		enzyme			0.0171	ADGRL3,APLP2,ATP1B1,FASN,NR5A2
11-dehydrocorticosterone		chemical - endogenous mammalian			0.0173	FASN
ACACA		enzyme			0.0173	FASN
AGRN		other			0.0173	UTRN
BCKDK		kinase			0.0173	CAT
CPEB4		other			0.0173	GPC6
INPP4B		phosphatase			0.0173	ELAPOR1
Mup1 (includes others)		other			0.0173	FASN
N-chlorotaurine		chemical - kinase inhibitor			0.0173	CAT
STK25		kinase			0.0173	FASN
TENM1		transmembrane receptor			0.0173	SEMA6A
UCHL3		peptidase			0.0173	FASN
WNT5B		other			0.0173	PROX1
bupivacaine		chemical drug			0.0173	UTRN
carnosine		chemical - endogenous mammalian			0.0173	FASN
pentazocine		chemical drug			0.0173	CAT
tannic acid		chemical toxicant			0.0173	FASN
CGA		other			0.0173	CTNNBIP1,ELAPOR1
GW501516		chemical drug			0.0173	CAT,FASN
NFATC1		transcription regulator			0.0179	GPC6,UTRN
MYCN		transcription regulator			0.018	LRRN1,MAT2A,PTDSS1
IL5		cytokine			0.0185	ATP1B1,MAT2A,NABP1
Mapk		group			0.0186	CAT,PIGR
WNT3A		cytokine			0.019	ATP1B1,NR5A2,TCF7L2
AFF1		transcription regulator			0.0192	EPHA7
RBPJL		transcription regulator			0.0192	PRSS3
SIK1/SIK1B		kinase			0.0192	FASN
Sik1		kinase			0.0192	FASN
THOC5		other			0.0192	DTD2
oxadiazon		chemical toxicant			0.0192	CAT
FOXO4		transcription regulator			0.0192	CAT,FASN
NR5A2	0.065	ligand-dependent nuclear receptor			0.0192	FASN,NR5A2
plicamycin		chemical drug			0.0192	FASN,PTDSS1
2,4,5,2',4',5'-hexachlorobiphenyl		chemical toxicant			0.0196	FASN,PIK3C2A
YY1		transcription regulator			0.0202	ALCAM,MAT2A,PROX1
GNA15		enzyme			0.0202	MAT2A,SYNE1
PI3K (family)		group			0.0202	CAT,FASN
RXRA		ligand-dependent nuclear receptor			0.0204	CAT,FASN,NR5A2
IFNG		cytokine		0.49	0.0207	ATP1B1,CAT,FASN,MAT2A,NR5A2,PIGR,TCF7L2
4-hydroxyestradiol-17beta		chemical - endogenous mammalian			0.0211	CAT
Adaptor protein 2		complex			0.0211	PIGR
COL17A1		other			0.0211	TCF7L2
FANCD2		other			0.0211	CAT
Fcor		enzyme			0.0211	CAT
H3C14		other			0.0211	ADGRL3
LNX2		other			0.0211	TCF7L2
NCOA6		transcription regulator			0.0211	FASN
Ncoa6		transcription regulator			0.0211	FASN
PARP2		enzyme			0.0211	FASN
PDE3B		enzyme			0.0211	FASN
RFX2		transcription regulator			0.0211	DCDC2
nandrolone		chemical drug			0.0211	CAT
naringin		chemical - endogenous non-mammalian			0.0211	CAT
sphingomyelin		chemical - endogenous mammalian			0.0211	FASN
l-asparaginase		biologic drug			0.0212	FASN,MSMO1
AMPK		complex			0.0226	CAT,FASN
GW3965		chemical reagent			0.023	FASN,NR5A2
CDN1163		chemical reagent			0.023	FASN
Col17a1		other			0.023	TCF7L2
DBI		other			0.023	FASN
LAMTOR1		other			0.023	FASN
MTORC2		complex			0.023	FASN
NRG4		growth factor			0.023	FASN
TRIB1		kinase			0.023	FASN
beta-cyclodextrin		chemical - endogenous non-mammalian			0.023	FASN
putrescine		chemical - endogenous mammalian			0.023	MAT2A
OSM		cytokine		-1	0.0232	CAT,FASN,PIGR,SYNE1
ETV6-RUNX1		fusion gene/product			0.0233	EPHA7,SEMA6A,TCF7L2
PELP1		other			0.0241	PRSS3,TCF7L2
PD98059		chemical - kinase inhibitor		-1.732	0.0242	FASN,MAT2A,PRSS3,RTCB
corticosterone		chemical - endogenous mammalian			0.0248	ATP1B1,FASN
ANGPTL4		other			0.0249	FASN
CAMKK2		kinase			0.0249	FASN
CYP51A1		enzyme			0.0249	MSMO1
FABP2		transporter			0.0249	FASN
KT5720		chemical - kinase inhibitor			0.0249	MAT2A
MBTPS1		peptidase			0.0249	FASN
PEMT		enzyme			0.0249	PTDSS1
XRCC5		enzyme			0.0249	FASN
digoxin		chemical drug			0.0249	FASN
gamma-linolenic acid		chemical - endogenous mammalian			0.0249	FASN
PDGF BB		complex			0.0259	FASN,MAT2A,SYNE1
arsenic trioxide		chemical drug			0.0261	ATP1B1,FASN,MSMO1
TNF		cytokine		0.442	0.0266	ALCAM,CAT,FASN,GSTM2,LRRC8D,MAT2A,NR5A2,PIGR
5'-methylthioadenosine		chemical - endogenous mammalian			0.0268	MAT2A
COL6A1		other			0.0268	FASN
GTF2I		transcription regulator			0.0268	CAT
IQGAP2		other			0.0268	CTNNBIP1
RGCC		other			0.0268	FASN
SOCS2		other			0.0268	FASN
YWHAG		other			0.0268	UTRN
ginsenoside Rb1		chemical - endogenous non-mammalian			0.0268	FASN
octanoic acid		chemical - endogenous mammalian			0.0268	FASN
IL3		cytokine			0.0284	CAT,FASN,PROX1
Z-LLL-CHO		chemical - protease inhibitor			0.0284	CAT,FASN,MAT2A
Mek		group			0.0286	APLP2,FASN,SEMA6A
(-)-norephedrine		chemical drug			0.0287	MSMO1
BTC		growth factor			0.0287	FASN
Betacatenin/TCF		complex			0.0287	NR5A2
EHHADH		enzyme			0.0287	FASN
G-1		chemical reagent			0.0287	FASN
INSIG2		other			0.0287	FASN
SELENOS		other			0.0287	FASN
SERTAD2		transcription regulator			0.0287	CAT
SP2		transcription regulator			0.0287	MAT2A
SPINT1		other			0.0287	PROX1
THRAP3		transcription regulator			0.0287	APLP2
VEGFC		growth factor			0.0287	PROX1
Z-551		chemical reagent			0.0287	FASN
galactose		chemical - endogenous mammalian			0.0287	FASN
orotic acid		chemical - endogenous mammalian			0.0287	FASN
sea cucumber body wall meal		chemical reagent			0.0287	FASN
NR3C2		ligand-dependent nuclear receptor			0.0289	ATP1B1,CAT
trichostatin A		chemical drug		1.172	0.029	APPBP2,FASN,MAT2A,TCF7L2,UTRN
tetrodotoxin		chemical drug			0.0293	ATP1B1,KCNH5
ACACB		enzyme			0.0305	FASN
IRAK2		kinase			0.0305	MAT2A
OMA1		peptidase			0.0305	FASN
PCYT2		enzyme			0.0305	FASN
farnesyl pyrophosphate		chemical - endogenous mammalian			0.0305	FASN
mannose		chemical - endogenous mammalian			0.0305	FASN
resatorvid		chemical drug			0.0305	CAT
SYVN1		transporter			0.0313	APLP2,FASN
mir-223		microrna			0.0313	ALCAM,MSMO1
ACOX1		enzyme			0.0321	CAT,FASN
ABCC8		transporter			0.0324	CAT
ALDH1A1		enzyme			0.0324	FASN
FKBP4		enzyme			0.0324	FASN
UCP2		transporter			0.0324	FASN
cerulenin		chemical drug			0.0324	FASN
decursin		chemical - endogenous non-mammalian			0.0324	FASN
nimesulide		chemical drug			0.0324	CAT
p85 (pik3r)		group			0.0324	FASN
CNR1		g-protein coupled receptor			0.0325	FASN,PIK3C2A
hydrocortisone		chemical - endogenous mammalian			0.0325	PROX1,SEMA6A
lovastatin		chemical drug			0.0325	CAT,FASN
HNRNPA2B1		other			0.0329	PRSS3,UTRN
testosterone		chemical - endogenous mammalian			0.0339	ATP1B1,CAT,NR5A2
AGPAT2		enzyme			0.0343	FASN
ARHGDIG		other			0.0343	ALCAM
ATP2A2		transporter			0.0343	FASN
FDFT1		enzyme			0.0343	FASN
FMO3		enzyme			0.0343	FASN
L-carnitine		chemical - endogenous mammalian			0.0343	CAT
acadesine		chemical drug			0.0343	FASN
glycyrrhetinic acid		chemical drug			0.0343	ATP1B1
propionic acid		chemical - endogenous mammalian			0.0343	KCNH5
taxifolin		chemical - endogenous non-mammalian			0.0343	CAT
ERBB2		kinase		0.447	0.0349	ADGRL3,APLP2,DAAM1,FASN,PRSS3
CREBZF		transcription regulator			0.0362	FASN
DAG1		transmembrane receptor			0.0362	UTRN
ERF		transcription regulator			0.0362	UTRN
G6PD		enzyme			0.0362	FASN
PLIN1		other			0.0362	FASN
RARRES2		transmembrane receptor			0.0362	FASN
Srebp		group			0.0362	FASN
TBXT		transcription regulator			0.0362	ALCAM
pirfenidone		chemical drug			0.0362	CAT
SNAI1		transcription regulator			0.0363	FASN,SLC28A3
APP		other			0.0364	APLP2,APPBP2,ATP1B1,CAT,PTDSS1
Akt		group			0.0375	APLP2,FASN,UTRN
RORC		ligand-dependent nuclear receptor			0.038	ATP1B1,GSTM2
CYB5R4		enzyme			0.038	FASN
IAPP		other			0.038	MSMO1
MLX		transcription regulator			0.038	FASN
NONO		transcription regulator			0.038	FASN
Ncoa-Nr1i2-Rxra		complex			0.038	CAT
RFX1		transcription regulator			0.038	DCDC2
RFX3		transcription regulator			0.038	DCDC2
SMARCD3		transcription regulator			0.038	ALCAM
MAPT		other			0.0385	ATP1B1,FASN,SYNE1
CD38		enzyme			0.0388	ATP1B1,NABP1
INS		other			0.0397	CAT,FASN
VCAN		other			0.0397	GPC6,TCF7L2
CDK8		kinase			0.0399	CTNNBIP1
CYP2E1		enzyme			0.0399	CAT
GABPB1		transcription regulator			0.0399	UTRN
GF 120918		chemical reagent			0.0399	PIK3C2A
HDAC7		transcription regulator			0.0399	ALCAM
MAT1A		enzyme			0.0399	ATP1B1
ODC1		enzyme			0.0399	MAT2A
Pkg		group			0.0399	CAT
miR-293-5p (and other miRNAs w/seed CUCAAAC)		mature microrna			0.0399	SYNE1
NR1I2		ligand-dependent nuclear receptor			0.0402	CAT,FASN
UCP1		transporter			0.0402	FASN,LRRC8D
PRKAG3		other			0.0411	ATP1B1,MAT2A
ACSS2		enzyme			0.0418	FASN
ADIPOR1		transmembrane receptor			0.0418	CAT
Abcb1b		transporter			0.0418	PIK3C2A
MC4R		g-protein coupled receptor			0.0418	FASN
MFSD2A		transporter			0.0418	FASN
NOX1		enzyme			0.0418	CAT
miR-218-5p (and other miRNAs w/seed UGUGCUU)		mature microrna			0.0418	PIK3C2A
miR-7a-5p (and other miRNAs w/seed GGAAGAC)		mature microrna			0.0418	SYNE1
TCF4		transcription regulator			0.0429	ALCAM,ELAPOR1,TCF7L2
ethanol		chemical - endogenous mammalian			0.0432	CAT,FASN,MAT2A
9Z,11E-octadecadienoic acid		chemical - endogenous mammalian			0.0436	FASN
BRD7		transcription regulator			0.0436	FASN
CL 316243		chemical drug			0.0436	FASN
DL-fructose		chemical - endogenous mammalian			0.0436	FASN
NFE2		transcription regulator			0.0436	CAT
SULT1E1		enzyme			0.0436	FASN
alvespimycin		chemical drug			0.0436	FASN
fibric acid derivative		chemical drug			0.0436	FASN
miR-30a-3p (and other miRNAs w/seed UUUCAGU)		mature microrna			0.0436	PIK3C2A
pitavastatin		chemical drug			0.0436	CAT
norepinephrine		chemical - endogenous mammalian			0.0438	MAT2A,PIGR
CYP7A1		enzyme			0.0455	FASN
FABP1		transporter			0.0455	FASN
HEY1		transcription regulator			0.0455	PROX1
HOXA13		transcription regulator			0.0455	EPHA7
Ikb		group			0.0455	MAT2A
THZ2		chemical - kinase inhibitor			0.0455	TCF7L2
carvedilol		chemical drug			0.0455	FASN
mir-103		microrna			0.0455	FASN
oleoyl-estrone		chemical drug			0.0455	FASN
SIRT1		transcription regulator			0.0467	CAT,FASN,MAT2A
NR1H4		ligand-dependent nuclear receptor			0.047	FASN,NR5A2
BTG2		transcription regulator			0.0473	CAT
HSD17B4		enzyme			0.0473	FASN
NCOR-LXR-Oxysterol-RXR-9 cis RA		complex			0.0473	FASN
PCYT1A		enzyme			0.0473	EPHA7
leukotriene B4		chemical - endogenous mammalian			0.0473	FASN
mir-214		microrna			0.0473	ALCAM
LEPR		transmembrane receptor			0.048	FASN,TCF7L2
ACLY		enzyme			0.0492	FASN
diazoxide		chemical drug			0.0492	FASN
linolenic acid		chemical - endogenous mammalian			0.0492	FASN
thyroid hormone receptor		group			0.0492	NR5A2

## Sheet: M33_C2vC1
© 2000-2020 QIAGEN. All rights reserved.
Upstream Regulator	Expr Log Ratio	Molecule Type	Predicted Activation State	Activation z-score	p-value of overlap	Target molecules in dataset	Mechanistic Network
LY294002		chemical - kinase inhibitor	Inhibited	-2.91	2.71e-07	ADAMTS1,Cald1,CCND1,CLCN3,HES1,IGF1R,MAP2,MCL1,SOCS2	Akt,CTNNB1,ESR1,ESR2,HIF1A,IL6,LY294002,PDX1,SP1,STAT1,VEGFA,prostaglandin E2
ERBB2		kinase		0.917	4.37e-07	ADAMTS5,CCND1,COL18A1,HES1,IGF1R,LIG1,Marcks,MCL1,MME,SFRP1,SOCS2	AR,Akt,CREB1,CTNNB1,ERBB2,ESR1,HDAC1,HIF1A,MAPK1,PDX1,PRL,PTEN,STAT1
ANGPT1		growth factor		1.982	1.05e-06	ADAMTS1,ADAMTS5,ADAMTS9,CCND1
staurosporine		chemical - kinase inhibitor		-0.447	2.28e-06	CCND1,CFTR,IGF1R,MCL1,MME	Akt,CTNNB1,ESR1,GSK3B,KLF6,KRAS,MDM2,PDX1,RELA,SP1,SRC,STAT1,staurosporine
sorafenib derivative SC-1		chemical reagent			3e-06	CCND1,MCL1
HTT		transcription regulator			3.15e-06	ADAMTS5,CCND1,COL18A1,MAP2,Marcks,NREP,PRELP,SFRP1,SOCS2
tyrphostin AG 1478		chemical - kinase inhibitor		-1.109	8.09e-06	CCND1,IGF1R,MCL1,MME	Akt,CTNNB1,EGFR,ESR1,GSK3B,HIF1A,KLF6,MDM2,PDX1,PI3K (complex),SP1,SRC,STAT1,tyrphostin AG 1478
R-etodolac		chemical drug			9e-06	CCND1,MCL1
SGI 1776		chemical drug			9e-06	CCND1,MCL1
TNF		cytokine		1.137	1.14e-05	ADAMTS5,CCND1,CFTR,FADS1,HES1,HID1,IGF1R,MCL1,OSMR,RCAN2,SFRP1,SOCS2,TIMP4	NFKBIA,RELA,SIRT1,TNF
EWSR1-FLI1		fusion gene/product			1.17e-05	CCND1,IGF1R,MAP2,NREP
PIN1		enzyme		1.928	1.17e-05	CCND1,HES1,MCL1,TIMP4	Akt,CTNNB1,E2F4,ESR1,HDAC1,PDX1,PIN1,RBL1,STAT1,TCF4
Ins1		other	Activated	2.382	1.62e-05	CCND1,COL18A1,FADS1,IGF1R,Marcks,SOCS2	AR,Ins1,PRL
miR-133a-3p (and other miRNAs w/seed UUGGUCC)		mature microrna			1.77e-05	IGF1R,KCNQ1,MCL1
CGP 74514A		chemical - kinase inhibitor			1.8e-05	CCND1,MCL1	CGP 74514A,HIF1A,RPS6KB1
HRAS		enzyme		1.457	1.97e-05	Cald1,CCND1,COL18A1,HES1,IGF1R,LBH,SOCS2,SPON1
PDGF BB		complex		1.082	2.22e-05	CCND1,COL18A1,HES1,IGF1R,MAP2,MCL1	APP,Akt,CTNNB1,ESR1,Jnk,PDGF BB,PDX1,PI3K (complex),SP1,SRC,STAT1
HGF		growth factor	Activated	2.577	2.31e-05	ADAMTS1,CCND1,HES1,MCL1,OSMR,SFRP1,SOCS2	CTNNB1,EGFR,HGF,HIF1A,NFKBIA,RELA,SP1,TNF,VEGFA,prostaglandin E2
Vegf		group	Activated	2.606	2.56e-05	ADAMTS1,HES1,HID1,MCL1,OSMR,SFRP1,SOCS2
rigosertib		chemical drug			2.99e-05	CCND1,MCL1
CSF2		cytokine		1.938	3.48e-05	CCND1,IRF2,MCL1,MME,OSMR,RHOV,SOCS2
CCN2		growth factor		0.911	3.54e-05	ADAMTS1,ADAMTS5,CCND1,HES1	CCN2,CTNNB1,HIF1A,VEGFA
EIF3E		other			4.73e-05	CCND1,COL18A1,LIG1
Akt		group		1.381	5.02e-05	CCND1,HES1,IGF1R,MAP2,MCL1,MME	Akt,CTNNB1,GSK3B,HIF1A,Jnk,KLF6,MDM2,PDX1,PTEN,SP1,SRC
HSPA9		other			5.09e-05	HES1,NAV2,TIMP4
beta-estradiol		chemical - endogenous mammalian		1.505	5.2e-05	ADAMTS1,ADAMTS5,CCND1,CFTR,CLCN3,FADS1,HES1,IGF1R,LIG1,MME,RHOV,SFRP1,SOCS2	ESR1,ESR2,FGF2,NFKBIA,PGR,RELA,RUNX2,SIRT1,STAT1,beta-estradiol,progesterone
KRAS		enzyme		-0.391	5.37e-05	Cald1,CCND1,CFTR,HES1,IGF1R,IRF2,LBH,MME	KRAS,NFKBIA,RELA,SIRT1
baicalein		chemical drug			6.31e-05	CCND1,IGF1R,MCL1	Akt,CTNNB1,ESR1,PDX1,STAT1,baicalein
TP73		transcription regulator		-0.692	7.43e-05	COL18A1,HES1,KCNQ1,LBH,LIG1,TIMP4
methylselenic acid		chemical reagent			7.59e-05	ADAMTS1,CCND1,IGF1R,MCL1,NREP
tretinoin		chemical - endogenous mammalian		1.37	8.02e-05	ADAMTS5,CCND1,CFTR,CLPS,HES1,IGF1R,MAP2,Marcks,MCL1,NAV2,SFRP1	Akt,CTNNB1,ERBB2,ESR1,ESR2,FGF2,HDAC1,NFKBIA,PDX1,RELA,RUNX2,SIRT1,STAT1,tretinoin
WNT1		cytokine			8.34e-05	CCND1,HES1,IGF1R,LBH	Akt,CTNNB1,E2F4,ESR1,HDAC1,PDX1,RBL1,STAT1,TCF4,WNT1
5-nitro-2-(3-phenylpropylamino)benzoic acid		chemical reagent			8.36e-05	CCND1,CLCN3
SULF1		enzyme			8.36e-05	ADAMTS5,CCND1
naproxen		chemical drug			8.36e-05	CCND1,COL18A1
F2		peptidase	Activated	2.149	0.000103	ADAMTS9,CCND1,IGF1R,LBH,RHOJ
BMS-387032		chemical drug			0.000107	CCND1,MCL1
salinomycin		chemical - endogenous non-mammalian			0.000107	CCND1,MCL1
ESR1		ligand-dependent nuclear receptor		1.497	0.000119	ADAMTS5,CCND1,CLCN3,CLN3,FAM102A,HES1,IGF1R,MAP2,MME,SOCS2	APP,Akt,CTNNB1,ESR1,ESR2,PDX1,STAT1
HDAC1		transcription regulator			0.000127	CCND1,HES1,LIG1,MME,SFRP1	CTNNB1,E2F4,HDAC1,RBL1,TCF4
dextran sulfate		chemical drug			0.000133	ADAMTS1,CCND1,COL18A1,IGF1R,OSMR
Trolox C		chemical drug			0.000134	IGF1R,MCL1	GSK3B,KLF6,MDM2,Trolox C
trichostatin A		chemical drug		-0.683	0.000141	ADAMTS1,ADAMTS5,CCND1,HES1,IRF2,MAP2,MME,SFRP1	CTNNB1,HDAC1,HIF1A,Hdac,Histone h4,NFKBIA,RBL1,RELA,trichostatin A
estrogen		chemical drug		0.689	0.000144	CCND1,CFTR,COL18A1,IGF1R,LIG1	BRCA1,MDM2,RB1,estrogen
MCL1	0.08	transporter			0.000164	CCND1,MCL1	CTNNB1,MCL1,PIN1
SS18-SSX2		fusion gene/product			0.000164	CCND1,MCL1
miR-193a-3p (and other miRNAs w/seed ACUGGCC)		mature microrna			0.000164	CCND1,MCL1
pterostilbene		chemical drug			0.000164	CCND1,HES1
PI3K (complex)		complex		1.906	0.000169	CCND1,IGF1R,IRF2,MAP2,MCL1	Akt,CTNNB1,ESR1,GSK3B,KLF6,LY294002,MDM2,PDX1,PI3K (complex),SP1,SRC,STAT1
tetradecanoylphorbol acetate		chemical drug	Activated	2.374	0.000184	ADAMTS1,CCND1,CFTR,HES1,IRF2,LBH,MCL1,MME,NAV2	CTNNB1,E2F4,HDAC1,HIF1A,KRAS,NFKB2,PGR,PRKCD,RBL1,RELA,TCF4,VEGFA,progesterone,tetradecanoylphorbol acetate
paclitaxel		chemical drug			0.000191	CCND1,MCL1,NREP,OSMR,PRELP
miR-451a (and other miRNAs w/seed AACCGUU)		mature microrna			0.000196	ADAMTS5,CCND1
AGT		growth factor		1.132	0.000208	ADAMTS5,CCND1,HES1,IGF1R,MAP2,NREP	AGT,Akt,CTNNB1,ESR1,FGF2,NFKBIA,PDX1,RELA,RUNX2,SIRT1,STAT1
prostaglandin E2		chemical - endogenous mammalian	Activated	2.189	0.000228	ADAMTS1,CCND1,IGF1R,MCL1,SOCS2	CTNNB1,E2F4,ESR2,HGF,HIF1A,IL6,SP1,SRC,prostaglandin E2
Raf		group			0.000242	CCND1,IGF1R,MCL1	Akt,CTNNB1,ESR1,PDX1,Raf,STAT1
IL1B		cytokine		1.34	0.000248	ADAMTS1,ADAMTS5,CFTR,HES1,MCL1,OSMR,SOCS2,TIMP4	CTNNB1,E2F4,HGF,HIF1A,IL1B,NFKBIA,RELA,TNF
mifepristone		chemical drug		-1.387	0.000253	CCND1,CFTR,COL18A1,MME,SFRP1
entinostat		chemical drug			0.000263	ADAMTS5,CCND1,MCL1	ESR2,IL6,entinostat
IQGAP2		other			0.00027	CCND1,SFRP1
noscapine		chemical drug			0.00027	CCND1,MCL1
silibinin		chemical drug			0.000275	CCND1,IGF1R,MCL1	Akt,CTNNB1,ESR1,PDX1,STAT1,silibinin
APOE		transporter		0	0.000275	ADAMTS5,CCND1,COL18A1,IGF1R,MAP2	APOE,APP,STAT1
ESR2		ligand-dependent nuclear receptor		0.728	0.000285	ADAMTS1,ADAMTS5,CCND1,IGF1R,MME,SOCS2	ESR1,ESR2,NFKBIA,RELA,beta-estradiol
dexamethasone		chemical drug		0.62	0.000289	ADAMTS1,CCND1,HES1,IGF1R,MAP2,MCL1,MME,NREP,PRELP,SFRP1,SOCS2,TIMP4	Akt,CTNNB1,E2F4,ESR1,HGF,HIF1A,PDX1,SP1,STAT1,STAT5A,VEGFA,dexamethasone,prostaglandin E2
48s		complex			0.000311	CCND1,IGF1R
APBB1		transcription regulator			0.000311	CCND1,HES1	APBB1,HDAC1,Histone h4,NCOA3
U0126		chemical - kinase inhibitor			0.000328	CCND1,CFTR,MCL1,NREP,OSMR,PRELP
MAPK7		kinase			0.000335	ADAMTS1,CCND1,MCL1
RBL1		transcription regulator			0.000335	CCND1,HES1,SFRP1
PRKCD		kinase		0	0.000338	CCND1,LBH,MCL1,NAV2	CTNNB1,E2F4,HDAC1,NFKB2,PRKCD,RBL1,TCF4
MAML1		transcription regulator			0.000355	CCND1,HES1
Stat5 dimer		complex			0.000355	CCND1,MCL1
miR-100-5p (and other miRNAs w/seed ACCCGUA)		mature microrna			0.000355	CCND1,IGF1R
morin		chemical - endogenous non-mammalian			0.000355	CCND1,COL18A1
IL6		cytokine		0.989	0.000396	ADAMTS1,ADAMTS5,CCND1,LIG1,MAP2,MCL1,SOCS2	CREB1,ESR1,ESR2,IL6,MAPK1
cobalt chloride		chemical reagent			0.000432	ADAMTS1,COL18A1,MCL1
wortmannin		chemical - kinase inhibitor		-1.154	0.000442	CCND1,IGF1R,MCL1,SOCS2	CREB1,GSK3B,HIF1A,KLF6,MAPK1,MDM2,PI3K (complex),SP1,SRC,STAT1,prostaglandin E2,wortmannin
PD98059		chemical - kinase inhibitor		-1.18	0.000446	Cald1,CCND1,IGF1R,MCL1,OSMR,SOCS2	GSK3B,HIF1A,JAK2,KLF6,MDM2,PD98059,RAF1,RB1,SP1,prostaglandin E2
SP1		transcription regulator			0.00045	ADAMTS1,CCND1,IGF1R,Marcks,MCL1,TIMP4	CTNNB1,HIF1A,SP1,VEGFA
PI-103		chemical - kinase inhibitor			0.000452	CCND1,MCL1	CTNNB1,GSK3B,HIF1A,Jnk,KLF6,MDM2,PI-103,RPS6KB1
pimozide		chemical drug			0.000452	CCND1,MCL1
CCN1		other			0.000463	CCND1,MCL1,SFRP1	CCN1,CTNNB1,E2F4,HDAC1,RBL1,TCF4
KDM1A		enzyme			0.000475	IGF1R,MAP2,SFRP1,SOCS2
IL7R		transmembrane receptor			0.000479	MCL1,SOCS2,SPON1
Gli		group			0.000504	CCND1,SFRP1
SULF2		enzyme			0.000504	ADAMTS5,CCND1
NCOA3		transcription regulator			0.000512	CCND1,HES1,IGF1R	Akt,CTNNB1,ESR1,Gsk3,MYB,NCOA3,PDX1,SIRT1,STAT1
mir-29		microrna			0.000512	ADAMTS9,CCND1,MCL1
BCR-ABL1		fusion gene/product			0.000546	CCND1,MME,SOCS2	BCR-ABL1,CREB1,CTNNB1,imatinib
RND3		enzyme			0.00056	CCND1,HES1
PD 153035		chemical drug			0.000618	CCND1,MCL1	CREB1,MAPK1,PD 153035
DSCAM		other			0.00062	MAP2,NREP,SFRP1
FGFR1		kinase			0.00062	ADAMTS5,CCND1,HES1	FGF2,FGFR1,RUNX2,STAT1
FSH		complex			0.000672	ADAMTS1,CCND1,COL18A1,IGF1R,MCL1	CG,CTNNB1,FSH,HIF1A,SP1,VEGFA
BMP6		growth factor			0.000678	ADAMTS1,ADAMTS5,Cald1
epigallocatechin-gallate		chemical drug		0.762	0.000693	CCND1,COL18A1,IGF1R,SFRP1	APP,CTNNB1,ERBB2,ESR2,HDAC1,STAT1,epigallocatechin-gallate
Growth hormone		group			0.000728	CCND1,COL18A1,IGF1R,SOCS2	ESR1,ESR2,GHR,Growth hormone,Gsk3,MYB,PDX1,SIRT1,STAT1,STAT5A
PD184352		chemical drug			0.000743	CCND1,MCL1	CREB1,CTNNB1,HIF1A,Jnk,MAPK1,PD184352,RPS6KB1
alvespimycin		chemical drug			0.000743	CCND1,MCL1
evodiamine		chemical - endogenous non-mammalian			0.000743	CCND1,MCL1
pregna-4,17-diene-3,16-dione		chemical - endogenous non-mammalian			0.000743	CCND1,MCL1
IFNG		cytokine		1.627	0.000764	ADAMTS9,CCND1,CFTR,IGF1R,IRF2,SFRP1,SOCS2,SPON1,TIMP4
Nfat (family)		group			0.000784	CCND1,LBH,RHOJ
THZ2		chemical - kinase inhibitor			0.000809	CCND1,MCL1
chelerythrine		chemical drug			0.000809	IGF1R,MCL1
actinomycin D		biologic drug		-1.94	0.000813	CCND1,IGF1R,MCL1,SFRP1	Akt,CTNNB1,ESR1,HIF1A,MDM2,PDX1,RB1,RPS6KB1,SP1,STAT1,actinomycin D,prostaglandin E2
FGF2		growth factor		1.033	0.000835	ADAMTS5,CCND1,HES1,IGF1R,SFRP1	CTNNB1,ERBB2,ESR2,FGF2,HDAC1,Histone h4,NFKBIA,RELA,RUNX2,STAT1,TNF
TLR9		transmembrane receptor	Activated	2	0.000864	CCND1,CLN3,Marcks,MCL1
glutamine		chemical - endogenous mammalian			0.000876	CCND1,IRF2,MCL1	HIF1A,PI3K (complex),RPS6KB1,STAT1,glutamine
phenethyl isothiocyanate		chemical drug			0.000876	CCND1,MAP2,MCL1	Akt,CTNNB1,ESR1,PDX1,STAT1,phenethyl isothiocyanate
BCL2L11		other			0.000879	CCND1,MCL1
SLPI		other			0.000879	CCND1,MCL1
UCN-01		chemical drug			0.000879	CCND1,MCL1	CTNNB1,Jnk,NFKB2,PRKCD,UCN-01
ibrutinib		chemical drug			0.000879	HES1,MCL1
BCL2		transporter			0.0009	CCND1,CLCN3,MCL1
EOMES		transcription regulator			0.000924	EGFLAM,MICAL2,NAV2
calyculin A		chemical toxicant			0.000951	CCND1,MCL1	GSK3B,KLF6,MDM2,calyculin A
NFKBIA		transcription regulator		1.732	0.00101	ADAMTS5,CCND1,CFTR,HES1,SFRP1	FGF2,NFKBIA,RELA,RUNX2,SIRT1,STAT1,TNF
ERBB3		kinase			0.00108	CCND1,IGF1R,SFRP1	ERBB3,Gsk3,MYB,PDX1,SIRT1,STAT1
L-glutamic acid		chemical - endogenous mammalian			0.00108	CCND1,FADS1,MAP2
CRYAB		other			0.0011	CCND1,MME
fludarabine		chemical drug			0.0011	CCND1,MCL1	CTNNB1,Jnk,fludarabine
ACTL6A		other			0.00118	CCND1,MCL1
NPPA		other			0.00118	CCND1,MCL1	CREB1,CTNNB1,Jnk,MAPK1,NPPA
SP4		transcription regulator			0.00118	CCND1,IGF1R
dichlorovinylcysteine		chemical toxicant			0.00118	CCND1,IGF1R
IL17A		cytokine		1.131	0.00122	CCND1,MCL1,OSMR,TIMP4	CTNNB1,EGFR,HIF1A,IL17A
LDL		complex			0.00122	CCND1,IGF1R,IRF2,MCL1	GSK3B,HIF1A,KLF6,LDL,MDM2,PI3K (complex),SP1,SRC,STAT1,prostaglandin E2
Alpha catenin		group			0.00125	ADAMTS1,ADAMTS5,RHOJ
JQ1		chemical reagent			0.00125	CCND1,CFTR,MCL1
trabectedin		chemical drug			0.00127	CCND1,IGF1R
urethane		chemical toxicant			0.00127	CCND1,SFRP1
GSK3B		kinase			0.00128	CCND1,IGF1R,MCL1	Akt,CTNNB1,ESR1,GSK3B,HIF1A,MDM2,PDX1,PI3K (complex),PTEN,PTPN11,RB1,SPI1,STAT1,STAT5A
PARP1		enzyme			0.00131	CCND1,HES1,SOCS2
SRC		kinase			0.00131	CCND1,IGF1R,MCL1	Akt,CTNNB1,ESR1,GSK3B,HIF1A,KLF6,MDM2,PDX1,PI3K (complex),PTEN,SP1,SRC,STAT1
lithium chloride		chemical drug			0.00131	CCND1,HES1,Marcks
RELA		transcription regulator			0.00135	ADAMTS5,CCND1,CFTR,HES1,IGF1R	NFKBIA,RELA,SIRT1,TNF
bufalin		chemical reagent			0.00135	CCND1,MCL1
caspase		group			0.00135	CCND1,MCL1	CTNNB1,Jnk,NFKB2,PRKCD,SP1,SRC,caspase
THRB		ligand-dependent nuclear receptor			0.00136	CCND1,CFTR,IGF1R,SFRP1	NFKBIA,RELA,SIRT1,THRB
RUNX2		transcription regulator			0.00137	ADAMTS5,CCND1,IGF1R
celecoxib		chemical drug			0.0014	CCND1,IGF1R,MCL1	Akt,CTNNB1,ESR1,GSK3B,KLF6,MDM2,PDX1,PI3K (complex),SP1,STAT1,celecoxib,cisplatin
corticosterone		chemical - endogenous mammalian			0.0014	Cald1,CCND1,SFRP1
tanespimycin		chemical drug			0.0014	CCND1,IGF1R,MCL1	Akt,CTNNB1,ESR1,PDX1,RELA,SIRT1,STAT1,tanespimycin
Histone h3		group			0.00142	CCND1,CLPS,HES1,IGF1R,SFRP1
SPI1		transcription regulator		-0.152	0.00144	CCND1,HES1,MCL1,MME	CTNNB1,HDAC1,SPI1
Fc gamma receptor		group			0.00144	CCND1,HES1	CTNNB1,Fc gamma receptor,Jnk,NCOA3,PAK1
KN 93		chemical - kinase inhibitor			0.00144	CCND1,MCL1	CREB1,CTNNB1,Jnk,KN 93,MAPK1
valproic acid		chemical drug	Inhibited	-2.097	0.00146	CCND1,IGF1R,Marcks,MCL1,MME	AR,Akt,CTNNB1,ESR1,GSK3B,KLF6,MDM2,PDX1,SP1,STAT1,valproic acid
PRL		cytokine		1	0.00149	CCND1,Marcks,MME,SOCS2	AR,CTNNB1,ERBB2,ESR2,HDAC1,PRL
TMPRSS2-ERG		fusion gene/product			0.0015	IGF1R,MME,SFRP1
BMS-690514		chemical drug			0.00153	CCND1,MCL1
Fgf		group			0.00153	CCND1,IGF1R	Fgf,RAF1,RB1,SP1,SRC
honokiol		chemical - endogenous non-mammalian			0.00153	CCND1,MCL1
prostaglandin J2		chemical - endogenous mammalian			0.00153	Cald1,CCND1
FGFR2		kinase			0.0016	CCND1,HES1,SFRP1
TSC2		other			0.0016	CCND1,MCL1,PRELP	HIF1A,RPS6KB1,TSC2
IKBKB		kinase			0.00161	Cald1,CCND1,SFRP1,SOCS2
EWSR1		other			0.00163	CCND1,MCL1
PAK1		kinase			0.00163	CCND1,HES1	CTNNB1,HIF1A,Jnk,NCOA3,PAK1,VEGFA
Secretase gamma		complex			0.00163	HES1,MME
daunorubicin		chemical drug			0.00163	CFTR,MCL1
fisetin		chemical toxicant			0.00163	CCND1,MCL1
STAT5A		transcription regulator			0.00163	CCND1,MCL1,SOCS2,TIMP4
IL4		cytokine	Activated	2.173	0.00167	CCND1,CLCN3,COL18A1,FADS1,IGF1R,MCL1,SOCS2	IL15,IL4,MYB,SP1,SRC,STAT5A
ATN1		transcription regulator			0.00167	Marcks,NREP,SOCS2
diclofenac		chemical drug			0.00172	CCND1,LBH
3,4-(methylenedioxy)cinnamic acid		chemical reagent			0.00176	MCL1
3beta-methoxypregnenolone		chemical drug			0.00176	MAP2
ADCY2		enzyme			0.00176	CCND1
BCL201		chemical drug			0.00176	MCL1
CALCOCO1		transcription regulator			0.00176	CCND1
CCDC62		transcription regulator			0.00176	CCND1
CDK20		kinase			0.00176	CCND1
E-64c		chemical - protease inhibitor			0.00176	MAP2
FANCE		other			0.00176	HES1
FANCG		other			0.00176	HES1
FANCL		enzyme			0.00176	HES1
FBXO31		enzyme			0.00176	CCND1
FERD3L		transcription regulator			0.00176	HES1
GTPBP4		enzyme			0.00176	CCND1
Integrin alpha 5 beta 1		complex			0.00176	CCND1
KCNJ12		ion channel			0.00176	CCND1
MPT0E028		chemical drug			0.00176	MCL1
Mapk kinase		group			0.00176	CCND1
NCK		group			0.00176	CCND1
NOTCH2NLA/NOTCH2NLB		other			0.00176	HES1
NR2F1-AS1		other			0.00176	CCND1
PF-562271		chemical drug			0.00176	MCL1
PLAC1		other			0.00176	CCND1
PMS2		enzyme			0.00176	CCND1
PTOV1		other			0.00176	CCND1
PTPRU		phosphatase			0.00176	CCND1
RB3		chemical reagent			0.00176	MCL1
RB4		chemical reagent			0.00176	MCL1
RPLP0		other			0.00176	CCND1
Ro 20-1724		chemical reagent			0.00176	CCND1
TOB2		other			0.00176	CCND1
TRIM17		enzyme			0.00176	MCL1
Tenascin		group			0.00176	CCND1
URGCP		other			0.00176	CCND1
WBP1		other			0.00176	MCL1
amlexanox		chemical drug			0.00176	CCND1
anti-miR-302c inhibitor		chemical reagent			0.00176	CCND1
anti-miR-302d		chemical reagent			0.00176	CCND1
beta-penta-O-galloyl-glucose		chemical - endogenous non-mammalian			0.00176	CCND1
betel quid extract		chemical reagent			0.00176	MAP2
ergothioneine		chemical - endogenous non-mammalian			0.00176	MAP2
meayamycin B		chemical reagent			0.00176	MCL1
miR-124 inhibitor		chemical reagent			0.00176	MCL1
mir-493		microrna			0.00176	IGF1R
pregnanolone		chemical - endogenous mammalian			0.00176	MAP2
spliceostatin A		chemical reagent			0.00176	MCL1
sulfaphenazole		chemical drug			0.00176	CCND1
trichloroacetic acid		chemical drug			0.00176	MCL1
venetoclax		chemical drug			0.00176	MCL1
EGFR		kinase		0.201	0.00178	CCND1,MCL1,MME,OSMR,SFRP1	CTNNB1,E2F4,EGFR,HDAC1,HIF1A,RBL1,SP1,TCF4
NR3C2		ligand-dependent nuclear receptor			0.00178	ADAMTS1,IGF1R,MAP2
VHL		transcription regulator			0.00178	CCND1,IGF1R,NREP
DICER1		enzyme			0.00183	CCND1,COL18A1,HES1,MAP2	Akt,CTNNB1,DICER1,ESR1,PDX1,STAT1
mibolerone		chemical drug			0.00186	CCND1,MME,PRELP
PGR		ligand-dependent nuclear receptor		1.656	0.00192	ADAMTS1,CCND1,HES1,LIG1
VEGFA		growth factor			0.00192	ADAMTS1,CCND1,HES1,MCL1	Akt,CTNNB1,ESR1,HIF1A,Jnk,NCOA3,PAK1,PDX1,RPS6KB1,SP1,STAT1,VEGFA
FGFR3		kinase			0.00192	CCND1,HES1	FGFR3,STAT1
MMP2		peptidase			0.00192	CCND1,COL18A1
PIAS1		transcription regulator			0.00192	CCND1,MCL1	CTNNB1,Jnk,PIAS1
alvocidib		chemical drug			0.00192	CCND1,MCL1	CREB1,CTNNB1,HIF1A,Jnk,MAPK1,RPS6KB1,alvocidib
lipoxin A4		chemical - endogenous mammalian			0.00192	CCND1,CFTR
nafenopin		chemical drug			0.00192	CCND1,CLPS
BRD4		kinase			0.00202	CCND1,FADS1,MCL1
dopamine		chemical - endogenous mammalian			0.00202	CLCN3,IGF1R,MAP2
AR		ligand-dependent nuclear receptor			0.00202	CCND1,IGF1R,KCNQ1,Marcks,MME
MEX3A		other			0.00203	CCND1,PRELP
lipopolysaccharide		chemical drug		0.952	0.00208	CCND1,CFTR,HES1,IRF2,Marcks,MCL1,MME,OSMR,SOCS2,TIMP4	AR,HDAC1,PRL,SPI1,STAT5A,lipopolysaccharide
PRKN		enzyme			0.00214	CCND1,MCL1	GSK3B,KLF6,MDM2,PRKN
lovastatin		chemical drug			0.00214	ADAMTS1,CCND1,MCL1	CTNNB1,HIF1A,RPS6KB1,SP1,lovastatin
CEACAM1		transporter			0.00225	COL18A1,IGF1R
Histone h4		group			0.00227	CCND1,HES1,SFRP1	CTNNB1,HDAC1,Histone h4
benzyl isothiocyanate		chemical - endogenous non-mammalian			0.00236	CCND1,MCL1	CTNNB1,Jnk,NFKB2,PRKCD,benzyl isothiocyanate
JAK2		kinase			0.00244	CCND1,IGF1R,OSMR	JAK2,MDM2,RAF1,RB1
PTPRC		phosphatase			0.00247	CCND1,MCL1	CREB1,CTNNB1,Jnk,MAPK1,NFKB2,PRKCD,PTPRC,SP1,SRC
everolimus		chemical drug			0.00247	CCND1,MCL1	CTNNB1,HIF1A,RPS6KB1,TCF4,everolimus
cisplatin		chemical drug		-0.537	0.00249	ADAMTS1,CCND1,IGF1R,IRF2,MCL1,NREP	GSK3B,HIF1A,KLF6,MDM2,SP1,SRC,STAT1,cisplatin,prostaglandin E2
EGF		growth factor		1.911	0.00252	CCND1,CLCN3,HES1,IGF1R,MCL1	Akt,CTNNB1,EGF,ESR1,GSK3B,Jnk,KLF6,MDM2,PDX1,SP1,SRC,STAT1
CREM		transcription regulator			0.00253	CCND1,Marcks,MCL1
RPS6KB1		kinase			0.00259	CCND1,MCL1	CTNNB1,GSK3B,HIF1A,KLF6,MDM2,RPS6KB1,SP1
sorafenib		chemical drug			0.00259	CCND1,MCL1	CREB1,CTNNB1,GSK3B,HIF1A,Jnk,KLF6,MAPK1,MDM2,NFKB2,RPS6KB1,bortezomib,sorafenib
arsenic trioxide		chemical drug		-1.97	0.00264	CCND1,FADS1,KCNQ1,MCL1	HIF1A,RPS6KB1,arsenic trioxide
imatinib		chemical drug		-0.903	0.00267	CCND1,MCL1,MME,SOCS2	Akt,CREB1,CTNNB1,ESR1,HIF1A,MAPK1,PDX1,PTPN11,RPS6KB1,SPI1,STAT1,STAT5A,imatinib
medroxyprogesterone acetate		chemical drug			0.00268	ADAMTS1,CCND1,RHOV
SST		other			0.00271	CCND1,IGF1R	ESR2,Growth hormone,SST
2-methoxyestradiol		chemical - endogenous mammalian			0.00284	MCL1,SPON1
ZMPSTE24		peptidase			0.00284	IGF1R,SOCS2
OSM		cytokine			0.00293	ADAMTS1,ADAMTS5,CCND1,MAP2,OSMR	ESR2,IL6,OSM
CYP1A2		enzyme			0.00296	CCND1,SOCS2
roscovitine		chemical drug			0.00309	CCND1,MCL1	CTNNB1,GSK3B,HIF1A,Jnk,KLF6,MDM2,RPS6KB1,STAT5A,roscovitine
Hdac		group			0.00313	ADAMTS1,CCND1,SFRP1	CTNNB1,HIF1A,Hdac,SP1
CREB1		transcription regulator		-0.128	0.00313	CCND1,MCL1,NEXMIF,NREP,SOCS2
MRTFB		transcription regulator			0.00323	ADAMTS1,MAP2,NREP
S100A9		other			0.00329	ADAMTS1,ADAMTS5,CCND1	ESR2,IL6,S100A9
PTH		other			0.00334	ADAMTS1,CCND1,MME
IL24		cytokine			0.00335	CCND1,MCL1
SMARCB1		transcription regulator			0.0034	CCND1,COL18A1,HES1
Hedgehog		group			0.00349	CCND1,HES1
(S)-flurbiprofen		chemical drug			0.00351	CCND1
3-keto, N-aminoethyl aminocaproyl dihydrocinnamoyl cyclopamine		chemical reagent			0.00351	SFRP1
BAI		chemical - kinase inhibitor			0.00351	MCL1
BCLAF1		transcription regulator			0.00351	CCND1
CCDC88C		other			0.00351	CCND1
CCNDBP1		other			0.00351	CCND1
CERT1		kinase			0.00351	CCND1
CTNNβ-LEF1		complex			0.00351	CCND1
DAPK3		kinase			0.00351	CCND1
DPH1		other			0.00351	CCND1
Dst		other			0.00351	MAP2
EIF4B		translation regulator			0.00351	MCL1
EIF4H		translation regulator			0.00351	CCND1
ETS-ELK1		complex			0.00351	CCND1
FANCF		other			0.00351	HES1
FBXO4		enzyme			0.00351	CCND1
Gelonin		chemical toxicant			0.00351	MCL1
HES7		transcription regulator			0.00351	HES1
HSPE1		other			0.00351	IGF1R
ILKAP		phosphatase			0.00351	CCND1
MAML2		transcription regulator			0.00351	HES1
MAML3		transcription regulator			0.00351	HES1
MCF2L		other			0.00351	CCND1
NASP		other			0.00351	CCND1
OSI-027		chemical drug			0.00351	CCND1
PMAIP1		other			0.00351	MCL1
PTPRF		phosphatase			0.00351	CCND1
RAC3		enzyme			0.00351	CCND1
RBM15		other			0.00351	HES1
REM2		enzyme			0.00351	CCND1
RNMT		enzyme			0.00351	CCND1
RPRD1B		other			0.00351	CCND1
SB-1317		chemical drug			0.00351	MCL1
SH3GLB1		enzyme			0.00351	MCL1
TFA-12		chemical reagent			0.00351	HES1
VENTX		transcription regulator			0.00351	CCND1
axitinib		chemical drug			0.00351	MCL1
caseamembrin C		chemical reagent			0.00351	MCL1
indolo(3,2-b)carbazole		chemical reagent			0.00351	SOCS2
inostamycin		chemical reagent			0.00351	CCND1
isopropyl thiogalactoside		chemical reagent			0.00351	CCND1
lonaprisan		chemical drug			0.00351	CCND1
lonidamine		chemical drug			0.00351	MCL1
mir-153		microrna			0.00351	MCL1
neratinib		chemical drug			0.00351	CCND1
nitrosomethylurethane		chemical reagent			0.00351	CCND1
parsatuzumab		biologic drug			0.00351	HES1
phosphorylethanolamine		chemical - endogenous mammalian			0.00351	CCND1
DGCR8		enzyme			0.00363	CCND1,HES1	DGCR8,HDAC1,SPI1
deoxycholate		chemical - endogenous mammalian			0.00363	CCND1,MCL1	CTNNB1,Jnk,deoxycholate
E2F3		transcription regulator			0.00374	CCND1,COL18A1,FAM102A
gefitinib		chemical drug			0.00374	ADAMTS1,CCND1,OSMR
CG		complex		1.939	0.00375	ADAMTS1,IGF1R,MCL1,TIMP4	CG,HIF1A,SP1,prostaglandin E2
MYB		transcription regulator			0.0038	CCND1,IGF1R,SOCS2
STAT1		transcription regulator		1.982	0.00382	CCND1,HES1,IGF1R,IRF2
calcitriol		chemical drug		-1.026	0.00384	CCND1,IGF1R,LBH,LIG1,MCL1	CREB1,CTNNB1,MAPK1,MDM2,NFKB2,PRKCD,RB1,SP1,SRC,calcitriol
BRCA1		transcription regulator			0.00386	CCND1,COL18A1,IGF1R	ATM,BRCA1,MDM2,RB1,STAT1
GHR		transmembrane receptor			0.00391	CCND1,SOCS2	AR,ESR2,GHR,Growth hormone,PRL,STAT5A
S100A8		other			0.00392	ADAMTS1,ADAMTS5,CCND1	ESR2,IL6,S100A8
FOXP3		transcription regulator			0.00398	IGF1R,LIG1,SOCS2
SHH		peptidase			0.00404	ADAMTS1,CCND1,SFRP1	Gli,SHH
acetaminophen		chemical drug			0.00404	CCND1,IGF1R,MCL1	GSK3B,HIF1A,KLF6,MDM2,SP1,acetaminophen,prostaglandin E2
EIF2S1		translation regulator			0.00406	CCND1,MCL1
JAG1		growth factor			0.00406	CCND1,HES1	CTNNB1,JAG1,TCF4
SFRP1	0.013	transmembrane receptor			0.00406	CCND1,SFRP1
CAT		enzyme			0.00421	IGF1R,MCL1	CAT,LDL,SP1,SRC,STAT1
leukotriene D4		chemical - endogenous mammalian			0.00421	ADAMTS1,MCL1
CYP1B1		enzyme			0.00436	CCND1,SOCS2
IRF1		transcription regulator			0.00436	CCND1,CFTR,IRF2
tetrachlorodibenzodioxin		chemical toxicant			0.00441	CCND1,COL18A1,HES1,SOCS2
PDX1		transcription regulator			0.00442	CCND1,IGF1R,MAP2
luteolin		chemical drug			0.00451	CCND1,IGF1R
ATF4		transcription regulator			0.00456	FAM102A,MCL1,OSMR
MAPK1		kinase		0.218	0.00461	CCND1,LIG1,MCL1,SOCS2	CREB1,ESR2,HIF1A,IL6,MAPK1,PD98059,RB1,RPS6KB1,STAT5A
troglitazone		chemical drug			0.00461	Cald1,CCND1,MCL1,MME	Akt,CTNNB1,E2F4,ESR1,HDAC1,PDX1,PTPN11,RBL1,SPI1,STAT1,STAT5A,TCF4,troglitazone
ZEB2		transcription regulator			0.00467	CCND1,SFRP1
bleomycin		chemical drug			0.0049	SFRP1,SOCS2,TIMP4
progesterone		chemical - endogenous mammalian		0.218	0.00498	ADAMTS1,CCND1,CFTR,LIG1,MME	PGR,progesterone
mir-181		microrna			0.00499	MCL1,MME
phenylbutazone		chemical drug			0.00499	ADAMTS1,CCND1
PSEN1		peptidase			0.005	CCND1,HES1,MAP2,MME	APP,Akt,CTNNB1,E2F4,ESR1,HDAC1,PDX1,PSEN1,RBL1,STAT1,TCF4
BRAF		kinase			0.00504	CCND1,MCL1,MME	Akt,BRAF,CTNNB1,EGFR,ESR1,HIF1A,PDX1,STAT1
HES1	0.273	transcription regulator			0.00515	ADAMTS5,HES1
HIC1		transcription regulator			0.00515	CCND1,FADS1
thapsigargin		chemical toxicant			0.00518	CCND1,LBH,MCL1	CTNNB1,E2F4,HDAC1,NFKB2,PRKCD,RBL1,TCF4,thapsigargin
NFkB (complex)		complex		1.124	0.00524	ADAMTS9,CCND1,CFTR,COL18A1,MCL1
(E)-1-(2-nitrovinyl)naphthalene		chemical reagent			0.00526	CCND1
(E)-9-(2-nitrovinyl)anthracene		chemical reagent			0.00526	CCND1
1-palmitoyl-2-arachidonoyl-phosphatidylcholine		chemical - endogenous mammalian			0.00526	CCND1
4-amino-6-hydrazino-7-beta-D-ribofuranosyl-7H-pyrrolo[2,3-d]-pyrimidine-5-carboxamide		chemical reagent			0.00526	MCL1
AA-861		chemical reagent			0.00526	IGF1R
AGAP2		enzyme			0.00526	CCND1
AHNAK		other			0.00526	CCND1
ARHGEF2		other			0.00526	CCND1
ATAD2		enzyme			0.00526	CCND1
Beta Secretase		group			0.00526	MME
CASP8AP2		transcription regulator			0.00526	MCL1
CTAG1A/CTAG1B		other			0.00526	CCND1
CYP2C9		enzyme			0.00526	CCND1
EIF2B1		translation regulator			0.00526	CCND1
EIF4F		complex			0.00526	MCL1
FKHR		group			0.00526	CCND1
G141		chemical reagent			0.00526	ADAMTS5
GOPC		transporter			0.00526	CFTR
GPC3		other			0.00526	CCND1
GPC6		transmembrane receptor			0.00526	CCND1
Jun-ATF2		complex			0.00526	CCND1
KLHL2		other			0.00526	CCND1
MAT2B		enzyme			0.00526	CCND1
MGAT4A		enzyme			0.00526	CCND1
NDUFAF3		other			0.00526	CCND1
NIBAN2		transcription regulator			0.00526	CCND1
NOP58		enzyme			0.00526	CCND1
NSD3		enzyme			0.00526	CCND1
OLA1		enzyme			0.00526	CCND1
PES1		other			0.00526	CCND1
PRAG1		kinase			0.00526	HES1
PSMD14		peptidase			0.00526	CCND1
PTTG1IP		other			0.00526	CCND1
RALGDS		other			0.00526	CCND1
RAN		enzyme			0.00526	MCL1
RASSF7		other			0.00526	CCND1
RBBP8		enzyme			0.00526	CCND1
RBM4		other			0.00526	MCL1
RDH16		enzyme			0.00526	CCND1
RRAD		enzyme			0.00526	CCND1
SERTAD1		transcription regulator			0.00526	CCND1
SKF-83959		chemical reagent			0.00526	MAP2
SLC48A1		transporter			0.00526	IGF1R
SPEN		transcription regulator			0.00526	HES1
SRGAP1		other			0.00526	CCND1
SRPK2		kinase			0.00526	CCND1
U2AF2		other			0.00526	CCND1
UBE2D3		enzyme			0.00526	CCND1
betamethasone valerate		chemical drug			0.00526	CCND1
glutathione ethyl ester		biologic drug			0.00526	MCL1
mafosfamide		chemical drug			0.00526	MCL1
miR-144-3p (miRNAs w/seed ACAGUAU)		mature microrna			0.00526	ADAMTS5
miR-153-3p (miRNAs w/seed UGCAUAG)		mature microrna			0.00526	MCL1
mir-497		microrna			0.00526	CCND1
mizoribine		chemical drug			0.00526	CCND1
myosin-light-chain kinase		group			0.00526	CCND1
nilutamide		chemical drug			0.00526	IGF1R
opaganib		chemical drug			0.00526	MAP2
ponasterone A		chemical reagent			0.00526	CCND1
rocuronium		chemical drug			0.00526	CCND1
tarenflurbil		chemical drug			0.00526	CCND1
TCF4		transcription regulator		0.277	0.00532	ADAMTS9,CCND1,HES1,MCL1	CTNNB1,E2F4,HDAC1,RBL1,TCF4
genistein		chemical drug		0.46	0.00541	CCND1,CFTR,CLN3,IGF1R	NFKBIA,RELA,SIRT1,genistein
etoposide		chemical drug			0.00555	CCND1,MCL1,MME	Akt,CTNNB1,EGFR,ESR1,HIF1A,PDX1,RPS6KB1,STAT1,etoposide
miR-16-5p (and other miRNAs w/seed AGCAGCA)		mature microrna			0.00562	CCND1,IGF1R,MCL1
BCL2L1		other			0.00583	MAP2,MCL1
NRG2		growth factor			0.00583	HES1,MCL1
folic acid		chemical - endogenous mammalian			0.00583	COL18A1,SFRP1
ERG		transcription regulator			0.00585	IGF1R,RCAN2,RHOJ
CTNNB1		transcription regulator		1.51	0.00587	CCND1,HES1,LBH,MCL1,MME,SFRP1	Akt,CTNNB1,E2F4,ESR1,HDAC1,PDX1,RBL1,STAT1,TCF4
CD44		other			0.00593	CCND1,COL18A1,MCL1	CD44,NFkB (complex)
SIRT1		transcription regulator			0.006	ADAMTS5,CCND1,IGF1R,MCL1	CTNNB1,GSK3B,Gsk3,HIF1A,KLF6,MDM2,MYB,NFKBIA,PDX1,PI3K (complex),PTEN,RELA,SIRT1,STAT1
EGLN1		enzyme			0.006	ADAMTS5,HES1
SGK1		kinase			0.006	CFTR,KCNQ1
azoxymethane		chemical toxicant			0.006	CCND1,IGF1R	GSK3B,KLF6,MDM2,STAT1,azoxymethane
hydroxyurea		chemical drug			0.006	CCND1,LIG1	MDM2,RB1,hydroxyurea
GLI1		transcription regulator			0.00601	CCND1,NREP,SFRP1
APP		other		0.257	0.00605	CCND1,COL18A1,HES1,IGF1R,MAP2,MME	APP,Akt,CTNNB1,ESR1,PDX1,PSEN1,STAT1
CHUK		kinase			0.00616	CCND1,COL18A1,SFRP1
simvastatin		chemical drug			0.00624	ADAMTS1,CCND1,FADS1
Collagen type I (complex)		complex			0.00636	CCND1,MCL1	CREB1,CTNNB1,Collagen type I (complex),HIF1A,MAPK1,SP1,SRC,VEGFA
Ngf		group			0.00636	CCND1,MAP2
calphostin C		chemical - kinase inhibitor			0.00636	CCND1,IGF1R	GSK3B,KLF6,MDM2,RAF1,RB1,SP1,SRC,calphostin C
Jnk		group			0.00641	CCND1,HES1,MCL1	Akt,CTNNB1,E2F4,ESR1,HDAC1,HIF1A,Jnk,PDX1,RBL1,RPS6KB1,STAT1,TCF4,VEGFA
RAF1		kinase			0.00649	CCND1,IGF1R,OSMR	MDM2,RAF1,RB1
COLQ		other			0.00654	ADAMTS5,PRELP
FANCC		other			0.00654	HES1,SFRP1
mir-133		microrna			0.00654	IGF1R,KCNQ1
mir-15		microrna			0.00654	CCND1,MCL1
BMP4		growth factor			0.00657	Cald1,CCND1,HES1
LIF		cytokine			0.00657	CCND1,HES1,SOCS2
DKK1		growth factor			0.00673	CCND1,LBH
2-deoxyglucose		chemical drug			0.00692	CCND1,MCL1	2-deoxyglucose,CTNNB1,GSK3B,HIF1A,Jnk,KLF6,MDM2,PTPN11,RPS6KB1,SP1,SPI1,SRC,STAT5A
GLI3		transcription regulator			0.00692	CCND1,SFRP1
1-[2,3-bis(furan-2-yl)quinoxalin-6-yl]-3-(4-bromophenyl)urea		chemical reagent			0.00701	MCL1
ADRA2B		g-protein coupled receptor			0.00701	CCND1
AMP		chemical - endogenous mammalian			0.00701	CLPS
ARF1		enzyme			0.00701	CCND1
ATP8B1		transporter			0.00701	CFTR
CBFA2T2		transcription regulator			0.00701	HES1
CDC25B		phosphatase			0.00701	CCND1
CINP		other			0.00701	CCND1
CTNNAL1		other			0.00701	CCND1
CYP11B2		enzyme			0.00701	IGF1R
Collagen type VI		complex			0.00701	CCND1
DACT3		other			0.00701	CCND1
DLL3		other			0.00701	HES1
DNAJB4		other			0.00701	CCND1
DNM2		enzyme			0.00701	CFTR
EIF3I		translation regulator			0.00701	CCND1
GALNS		enzyme			0.00701	MAP2
GALR1		g-protein coupled receptor			0.00701	CCND1
KP-SD-1		chemical - kinase inhibitor			0.00701	CCND1
L-alanine		chemical - endogenous mammalian			0.00701	CCND1
L-asparagine		chemical - endogenous mammalian			0.00701	CCND1
LY5		chemical reagent			0.00701	CCND1
MME	0.155	peptidase			0.00701	MAP2
MUCL1		other			0.00701	CCND1
Meg3		other			0.00701	HES1
ORAI3		other			0.00701	CCND1
PD 180970		chemical - kinase inhibitor			0.00701	MCL1
PLAC8		other			0.00701	CCND1
S3I-1757		chemical reagent			0.00701	CCND1
SEPTIN9		enzyme			0.00701	CCND1
SF3B1		other			0.00701	MCL1
SLC39A4		transporter			0.00701	CCND1
SLC9A3R2		transporter			0.00701	CCND1
SNRK		kinase			0.00701	CCND1
Slfn1		enzyme			0.00701	CCND1
TEX11		other			0.00701	CCND1
TLCD3A		other			0.00701	CCND1
UBTF		transcription regulator			0.00701	CCND1
abrocitinib		chemical drug			0.00701	MCL1
acetoacetic acid		chemical - endogenous mammalian			0.00701	CCND1
alpha-methylhydrocinnamic acid		chemical - endogenous mammalian			0.00701	MCL1
carboxyamido-triazole		chemical drug			0.00701	CCND1
goserelin		biologic drug			0.00701	IGF1R
inecalcitol		chemical drug			0.00701	CCND1
navitoclax		chemical drug			0.00701	MCL1
pentamidine		chemical drug			0.00701	MCL1
sepantronium		chemical drug			0.00701	MCL1
ATM		kinase			0.00711	CCND1,IGF1R	ATM,BRCA1,MDM2,RB1,STAT1
FGF7		growth factor			0.00711	CCND1,IRF2
PTHLH		other			0.00711	ADAMTS1,CCND1	CTNNB1,HIF1A,PTHLH,VEGFA
IL13		cytokine		1.964	0.00711	COL18A1,FADS1,MCL1,TIMP4
HIF1A		transcription regulator			0.00728	ADAMTS1,CCND1,MCL1,SFRP1	CCN1,CTNNB1,E2F4,HDAC1,HIF1A,PTEN,RBL1,SP1,TCF4,VEGFA
E2F4		transcription regulator			0.00743	CCND1,MCL1,SFRP1
PTEN		phosphatase		-1.213	0.00745	CCND1,IGF1R,MCL1,MME,SFRP1	Akt,CTNNB1,E2F4,EGFR,ESR1,GSK3B,HDAC1,HIF1A,KLF6,MDM2,PDX1,PTEN,RBL1,SP1,SRC,STAT1,TCF4
ADAM17		peptidase			0.00749	CCND1,HES1	ADAM17,JAG1,TCF4
butyric acid		chemical - endogenous mammalian		-1.858	0.00751	CCND1,CLCN3,IRF2,MCL1
IL15		cytokine		0.985	0.00757	CCND1,IGF1R,MCL1,SOCS2	Akt,CREB1,CTNNB1,ESR1,HIF1A,IL15,MAPK1,MYB,PDX1,RPS6KB1,STAT1,STAT5A
pirinixic acid		chemical toxicant		1.005	0.00757	CCND1,FADS1,LIG1,MCL1	CREB1,MAPK1,pirinixic acid
PTTG1		transcription regulator			0.00769	CCND1,LIG1	MDM2,PTTG1,RB1
WT1		transcription regulator			0.00807	CCND1,IGF1R,MCL1
Bay 11-7082		chemical - kinase inhibitor			0.00809	CCND1,MCL1	Bay 11-7082,CTNNB1,HIF1A,IL15,Jnk,MYB,STAT5A,VEGFA
cholesterol		chemical - endogenous mammalian			0.00817	FADS1,MAP2,MME
PRNP		other			0.00829	CCND1,IGF1R	ATM,BRCA1,MDM2,PRNP,RB1,STAT1
ROR2		kinase			0.00829	CCND1,MAP2
BCL6		transcription regulator			0.00845	CCND1,LBH,SOCS2
L-triiodothyronine		chemical - endogenous mammalian		0.827	0.00849	ADAMTS5,CCND1,IGF1R,RCAN2	AGT,L-triiodothyronine,NFKBIA,RELA,SIRT1,STAT1
KLF6		transcription regulator			0.0085	IGF1R,MCL1
MAP2K1/2		group			0.0085	CCND1,MCL1	CREB1,CTNNB1,HIF1A,Jnk,MAP2K1/2,MAPK1,RPS6KB1
MDM2		transcription regulator			0.0085	CCND1,IGF1R	ATM,BRCA1,MDM2,RB1,STAT1
MMP9		peptidase			0.0085	CCND1,COL18A1
PTPN11		phosphatase			0.0085	CCND1,MCL1	CTNNB1,GSK3B,HIF1A,Jnk,KLF6,MDM2,NFKB2,PRKCD,PTPN11,RPS6KB1,SP1,SRC
romidepsin		biologic drug			0.0085	CCND1,MCL1	CREB1,GSK3B,KLF6,MAPK1,MDM2,romidepsin
N-acetyl-L-cysteine		chemical drug			0.00855	CCND1,CFTR,IGF1R	ATM,BRCA1,MDM2,N-acetyl-L-cysteine,NFKBIA,RB1,RELA,SIRT1,STAT1
Gsk3		group			0.00871	CCND1,IGF1R	GSK3B,Gsk3,KLF6,MDM2,MYB,PDX1,RELA,SIRT1,STAT1
NFKB2		transcription regulator			0.00871	CCND1,MCL1	CREB1,MAPK1,NFKB2
RETNLB		other			0.00871	SFRP1,SOCS2
indomethacin		chemical drug			0.00874	ADAMTS1,ADAMTS5,CCND1	ESR2,IL6,indomethacin
(-)-gossypol		chemical drug			0.00875	MCL1
BCAR3		other			0.00875	CCND1
CDC27		other			0.00875	CCND1
CDH13		other			0.00875	CCND1
CDH16		enzyme			0.00875	CCND1
CEL		enzyme			0.00875	CCND1
CLDN2		other			0.00875	CCND1
CSF		group			0.00875	MCL1
Cathepsin		group			0.00875	CCND1
FLOT1		other			0.00875	CCND1
FZD7		g-protein coupled receptor			0.00875	CCND1
IL31RA		transmembrane receptor			0.00875	SOCS2
ILX-23-7553		chemical drug			0.00875	CCND1
JV-1-65 hGHRH(1-29)NH2		chemical reagent			0.00875	IGF1R
KLF8		transcription regulator			0.00875	CCND1
KRT10		other			0.00875	CCND1
L-aspartic acid		chemical - endogenous mammalian			0.00875	CCND1
MCF2		other			0.00875	CCND1
MELK		kinase			0.00875	MCL1
Muc1		transmembrane receptor			0.00875	CCND1
PORCN		enzyme			0.00875	CCND1
PRMT2		enzyme			0.00875	CCND1
PSAP		enzyme			0.00875	CCND1
RBM14		transcription regulator			0.00875	CCND1
RNF187		enzyme			0.00875	CCND1
SLC39A8		transporter			0.00875	ADAMTS5
SNCG		other			0.00875	IGF1R
TLN1		other			0.00875	MCL1
TTYH1		ion channel			0.00875	HES1
VCAM1		transmembrane receptor			0.00875	CCND1
WNK4		kinase			0.00875	CFTR
ZIC1		transcription regulator			0.00875	CCND1
ZMIZ2		transcription regulator			0.00875	CCND1
ZNF536		transcription regulator			0.00875	MAP2
aclarubicin		chemical drug			0.00875	MCL1
ethacrynic acid		chemical drug			0.00875	MCL1
miR-615-5p (and other miRNAs w/seed GGGGUCC)		mature microrna			0.00875	IGF1R
mir-338		microrna			0.00875	CCND1
omacetaxine mepesuccinate		chemical drug			0.00875	MCL1
p38 Sapk		group			0.00875	CCND1
scoparone		chemical - endogenous non-mammalian			0.00875	CCND1
silicon phthalocyanine		chemical drug			0.00875	CCND1
tyrphostin 25		chemical - kinase inhibitor			0.00875	IGF1R
GAST		other			0.00892	CCND1,HES1	CTNNB1,GAST,Jnk,TCF4
prednisolone		chemical drug			0.00904	CLN3,HES1,MCL1
MBD3		other			0.00913	CCND1,SFRP1
ZBTB17		transcription regulator			0.00913	CCND1,OSMR
IL33		cytokine			0.00914	ADAMTS1,CCND1,Marcks
forskolin		chemical toxicant		1.103	0.00918	ADAMTS1,CCND1,CFTR,COL18A1,IGF1R	ESR2,Growth hormone,forskolin
bortezomib		chemical drug			0.00935	CCND1,IGF1R,MCL1	ATM,Akt,BRCA1,CTNNB1,ESR1,GSK3B,HIF1A,KLF6,MDM2,PDX1,RB1,RPS6KB1,STAT1,bortezomib
CFTR	0.052	ion channel			0.00956	CFTR,FADS1
Lh		complex			0.00966	ADAMTS1,COL18A1,MCL1
AICAR		chemical - endogenous mammalian			0.00978	CCND1,IGF1R	AICAR,GSK3B,KLF6,MDM2,RB1
RB1		transcription regulator			0.00996	CCND1,IGF1R,LIG1,OSMR	MDM2,RB1
TP63		transcription regulator		0.415	0.00996	ADAMTS1,CCND1,HES1,SPON1
IGF1		growth factor		1.294	0.0102	CCND1,IGF1R,MCL1,OSMR
KITLG		growth factor			0.0102	IGF1R,IRF2,MME
ERBB4		kinase			0.0102	CCND1,SFRP1
MAPK3		kinase			0.0102	CCND1,MCL1
PRDM5		transcription regulator			0.0102	NAV2,NREP
Insulin		group		1.103	0.0102	CCND1,FADS1,HES1,IGF1R
FGF19		growth factor			0.0105	CCND1,MME
MYOC		other			0.0105	ADAMTS1,SFRP1
miR-29b-3p (and other miRNAs w/seed AGCACCA)		mature microrna			0.0105	CCND1,MCL1
3',4',7-trihydroxyisoflavone		chemical - endogenous non-mammalian			0.0105	CCND1
ANKHD1/ANKHD1-EIF4EBP3		other			0.0105	CCND1
BAD		other			0.0105	CCND1
BPIFB1		other			0.0105	CCND1
CCN6		growth factor			0.0105	ADAMTS5
CIMO		chemical reagent			0.0105	CCND1
CXXC4		other			0.0105	CCND1
Crnde		other			0.0105	CCND1
ECT2		other			0.0105	CCND1
EGFL7		other			0.0105	HES1
EIF4A3		enzyme			0.0105	CCND1
GRK6		kinase			0.0105	MCL1
GSI34		chemical reagent			0.0105	CCND1
GSK690693		chemical drug			0.0105	IGF1R
KCNQ1OT1		other			0.0105	KCNQ1
OMP-52M51		biologic drug			0.0105	HES1
PLSCR1		enzyme			0.0105	CCND1
PXN		other			0.0105	CCND1
RO4929097		chemical drug			0.0105	HES1
SIX3		transcription regulator			0.0105	CCND1
SLC7A11-AS1		other			0.0105	CCND1
SNIP1		other			0.0105	CCND1
SRPK1		kinase			0.0105	MCL1
STX2		transporter			0.0105	CCND1
TFF2		other			0.0105	CCND1
THBS2		other			0.0105	HES1
TRPC3		ion channel			0.0105	CCND1
YWHAB		other			0.0105	CCND1
Z-VEID-FMK		chemical reagent			0.0105	CCND1
ZMIZ1		transcription regulator			0.0105	HES1
ZYX		other			0.0105	Cald1
ambroxol		chemical drug			0.0105	CFTR
aurintricarboxylic acid		chemical drug			0.0105	IGF1R
dibenzoylmethane		chemical toxicant			0.0105	CCND1
fenebrutinib		chemical drug			0.0105	MCL1
mir-637		microrna			0.0105	CCND1
obatoclax		chemical drug			0.0105	MCL1
ruboxistaurin		chemical drug			0.0105	Marcks
vanillyl-N-nonylamide		chemical drug			0.0105	CCND1
CSF1		cytokine			0.0105	CCND1,IGF1R,SFRP1
PRDM1		transcription regulator			0.0105	IGF1R,MCL1,SOCS2
COL18A1	0.038	other			0.0107	CCND1,MCL1
niacinamide		chemical - endogenous mammalian			0.0107	MCL1,RHOJ
E. coli B5 lipopolysaccharide		chemical - endogenous non-mammalian			0.0107	ADAMTS1,CCND1,SOCS2
DSCAML1		other			0.0109	MAP2,SFRP1
nocodazole		chemical reagent			0.0111	CCND1,MCL1
TCF		group			0.0114	CCND1,MME
NOTCH1		transcription regulator			0.0115	CCND1,HES1,IGF1R
AG490		chemical - kinase inhibitor			0.0116	CFTR,MCL1
ATF2		transcription regulator			0.0119	CCND1,MCL1
PDLIM2		other			0.0119	CCND1,MME
NRG1		growth factor			0.0119	CCND1,HES1,MCL1
FGF8		growth factor			0.0121	CCND1,COL18A1
okadaic acid		chemical toxicant			0.0121	CCND1,MCL1
AKIRIN2		other			0.0122	CCND1
ATE1		enzyme			0.0122	CCND1
BANCR		other			0.0122	CCND1
BANP		other			0.0122	CCND1
C1orf61		other			0.0122	CCND1
CAPNS1		peptidase			0.0122	CCND1
CBR3-AS1		other			0.0122	CCND1
CCN4		other			0.0122	CCND1
DAB2		other			0.0122	CCND1
Gm26313		other			0.0122	Cald1
HNRNPR		other			0.0122	Cald1
IER3		other			0.0122	MCL1
ISX		transcription regulator			0.0122	CCND1
KHDRBS1		transcription regulator			0.0122	CCND1
L-proline		chemical - endogenous mammalian			0.0122	CCND1
MIB1		enzyme			0.0122	HES1
MS4A1		other			0.0122	MCL1
P2RY4		g-protein coupled receptor			0.0122	TIMP4
PDE3A		enzyme			0.0122	CCND1
PHIP		other			0.0122	CCND1
PROK1		growth factor			0.0122	MCL1
RAP1GAP		other			0.0122	CCND1
RAX		transcription regulator			0.0122	HES1
RBX1		enzyme			0.0122	MCL1
RDH10		enzyme			0.0122	SFRP1
RIOX1		enzyme			0.0122	IGF1R
SHCBP1		other			0.0122	CCND1
TNIK		kinase			0.0122	CCND1
TNKS		enzyme			0.0122	MCL1
citric acid		chemical - endogenous mammalian			0.0122	MCL1
coconut oil		chemical drug			0.0122	MAP2
cyclosporin		biologic drug			0.0122	CCND1
dimethyl sulfone		chemical drug			0.0122	IGF1R
geranylgeraniol		chemical - endogenous mammalian			0.0122	MCL1
idelalisib		chemical drug			0.0122	MCL1
miR-124 mimic		chemical reagent			0.0122	MCL1
miR-139-5p (miRNAs w/seed CUACAGU)		mature microrna			0.0122	IGF1R
mir-320		microrna			0.0122	MCL1
olomoucine		chemical - kinase inhibitor			0.0122	MAP2
perifosine		chemical drug			0.0122	MCL1
retroinverso ERG inhibitory peptide 1		chemical reagent			0.0122	ADAMTS1
retroinverso ERG inhibitory peptide 2		chemical reagent			0.0122	ADAMTS1
temsirolimus		chemical drug			0.0122	CCND1
triolein		chemical drug			0.0122	FADS1
vorinostat		chemical drug			0.0122	ADAMTS1,CCND1,MCL1
OGT		enzyme			0.0123	CCND1,LBH
fulvestrant		chemical drug			0.0125	CCND1,HES1,IGF1R
NCOR1		transcription regulator			0.0126	CCND1,MME
PC-SPES		chemical drug			0.0126	CCND1,IRF2
YAP1		transcription regulator			0.0131	ADAMTS1,CCND1,IGF1R
decitabine		chemical drug		0.24	0.0131	ADAMTS1,CCND1,CFTR,MAP2,SFRP1
CYP1A1		enzyme			0.0133	CCND1,SOCS2
NS-398		chemical reagent			0.0136	CCND1,MCL1
RBL2		other			0.0136	CCND1,SFRP1
TNFSF10		cytokine			0.0136	IGF1R,MCL1
STAT5B		transcription regulator			0.0137	CCND1,MCL1,SOCS2
N-cor		group			0.0139	CCND1,HES1
1,3-bis(4-hydroxyphenyl)-4-methyl-5-[4-(2-piperidinylethoxy)phenol]-1H-pyrazole		chemical reagent			0.014	CCND1
ARAF		kinase			0.014	CCND1
ARHGEF1		other			0.014	CCND1
CCDC80		other			0.014	CCND1
COTI-2		chemical drug			0.014	MCL1
CXCR1		g-protein coupled receptor			0.014	CCND1
DBH-AS1		other			0.014	CCND1
DGKZ		kinase			0.014	CCND1
DKK2		other			0.014	CCND1
FANCA		other			0.014	HES1
GCS-100		chemical drug			0.014	MCL1
HINT1		enzyme			0.014	FADS1
LINC00461		other			0.014	CCND1
MAOA		enzyme			0.014	CCND1
MFGE8		other			0.014	CCND1
MSI1		other			0.014	HES1
N-Cadherin		group			0.014	CCND1
PCM1-JAK2		fusion gene/product			0.014	SOCS2
PIWIL2		enzyme			0.014	CCND1
PPP2R1A		phosphatase			0.014	MCL1
RBCK1		transcription regulator			0.014	CCND1
S100a7a		other			0.014	CCND1
SLC25A4		transporter			0.014	MCL1
SNW1		transcription regulator			0.014	CCND1
UCA1		other			0.014	CCND1
VTCN1		other			0.014	CCND1
Vhl		complex			0.014	CCND1
WNT7B		other			0.014	CCND1
artemisinin		chemical drug			0.014	CCND1
evofosfamide		chemical drug			0.014	CCND1
miR-140-5p (and other miRNAs w/seed AGUGGUU)		mature microrna			0.014	ADAMTS5
miR-192-5p (and other miRNAs w/seed UGACCUA)		mature microrna			0.014	IGF1R
rhodamine 6G		chemical toxicant			0.014	CCND1
sivelestat		chemical drug			0.014	MCL1
vandetanib		chemical drug			0.014	CCND1
LDB1		transcription regulator			0.014	ADAMTS9,COL18A1,SFRP1
TAZ		enzyme			0.0141	ADAMTS1,ADAMTS5
CGA		other			0.0144	ADAMTS1,CCND1
NFKB1		transcription regulator			0.0145	CCND1,CFTR,MCL1
KAT5		transcription regulator			0.0146	CCND1,CFTR
GLI2		transcription regulator			0.0152	CCND1,SFRP1
AKT1		kinase			0.0154	CCND1,IGF1R,MCL1
CD24		other			0.0154	CFTR,TIMP4
VIP		other			0.0154	CCND1,CFTR
mir-10		microrna			0.0154	IGF1R,MCL1
tazemetostat		chemical drug			0.0156	ADAMTS1,CCND1,MAP2
AGRN		other			0.0157	MAP2
AKAP12		transporter			0.0157	CCND1
Bcl9-Cbp/p300-Ctnnb1-Lef/Tcf		complex			0.0157	CCND1
CCND2		other			0.0157	CCND1
CD160		transmembrane receptor			0.0157	MCL1
Ccl6		cytokine			0.0157	TIMP4
DEK		transcription regulator			0.0157	MCL1
I-BOP		chemical reagent			0.0157	CCND1
JMF3086		chemical reagent			0.0157	CCND1
MED15		transcription regulator			0.0157	CCND1
MEMO1		other			0.0157	CCND1
MSGN1		transcription regulator			0.0157	HES1
MSH2		enzyme			0.0157	CCND1
PD 168393		chemical - kinase inhibitor			0.0157	MCL1
PINK1		kinase			0.0157	CCND1
PRKCG		kinase			0.0157	CCND1
RECK		other			0.0157	CCND1
S6K1		group			0.0157	MCL1
TACSTD2		other			0.0157	CCND1
VWF		other			0.0157	HES1
WNT5B		other			0.0157	CCND1
YBX3		transcription regulator			0.0157	CCND1
ZIC2		transcription regulator			0.0157	CCND1
bendamustine		chemical drug			0.0157	MCL1
cyclopentenone		chemical reagent			0.0157	CCND1
genipin		chemical - endogenous non-mammalian			0.0157	CCND1
lead acetate		chemical toxicant			0.0157	CCND1
thiocoraline		chemical reagent			0.0157	HES1
EIF2AK3		kinase			0.0157	CCND1,CLCN3
pyrrolidine dithiocarbamate		chemical reagent			0.0157	CFTR,IGF1R
SP600125		chemical - kinase inhibitor			0.0157	ADAMTS9,CCND1,MCL1
SPARC		other			0.016	HES1,MAP2
berberine		chemical drug			0.016	CCND1,MCL1
diethylnitrosamine		chemical toxicant			0.0163	CCND1,MCL1
sirolimus		chemical drug			0.0163	CCND1,IGF1R,MCL1,RCAN2
KLF4		transcription regulator			0.0164	ADAMTS1,CCND1,HES1
GNA15		enzyme			0.0168	HES1,MAP2
SYK		kinase			0.0168	CCND1,CFTR
mir-1		microrna			0.0168	IGF1R,SFRP1
CCR2		g-protein coupled receptor			0.0171	PRELP,TIMP4
ATP		chemical - endogenous mammalian			0.0171	ADAMTS9,CCND1
SP2509		chemical reagent			0.0171	ADAMTS1,CCND1,MAP2
diethylstilbestrol		chemical drug			0.0171	CCND1,IGF1R,SOCS2
KIT		transmembrane receptor			0.0174	MCL1,SOCS2
2-hydroxy-1-naphthylaldehyde isonicotinoyl hydrazone		chemical reagent			0.0174	CCND1
APC/APC2		group			0.0174	MCL1
ATF5		transcription regulator			0.0174	MCL1
CAMK2N2		other			0.0174	CCND1
CDKN1C		other			0.0174	CCND1
CGP 42112		chemical reagent			0.0174	MAP2
DHH		peptidase			0.0174	ADAMTS1
EXT1		enzyme			0.0174	CCND1
FUS		transcription regulator			0.0174	CCND1
GNA11		enzyme			0.0174	ADAMTS1
INCB054329		chemical drug			0.0174	CCND1
IQGAP1		other			0.0174	CCND1
JMJD6		transmembrane receptor			0.0174	CCND1
L-threonine		chemical - endogenous mammalian			0.0174	CCND1
MLH1		enzyme			0.0174	CCND1
NMNAT1		enzyme			0.0174	SOCS2
NQO2		enzyme			0.0174	CCND1
PARP14		enzyme			0.0174	MCL1
PF-3084014		chemical drug			0.0174	MCL1
PPM1D		phosphatase			0.0174	CCND1
PRKCH		kinase			0.0174	CCND1
RBPJL		transcription regulator			0.0174	HES1
S100P		other			0.0174	CCND1
SETD7		enzyme			0.0174	CCND1
SS18-SSX1		fusion gene/product			0.0174	CCND1
TEAD		group			0.0174	CCND1
belinostat		chemical drug			0.0174	MCL1
cercosporin		chemical - endogenous non-mammalian			0.0174	CCND1
gamma-secretase inhibitor XX		chemical reagent			0.0174	HES1
gossypol		chemical drug			0.0174	MCL1
mir-503		microrna			0.0174	IGF1R
niclosamide		chemical drug			0.0174	MCL1
quinidine		chemical drug			0.0174	CCND1
TP53		transcription regulator		1.248	0.0176	Cald1,CCND1,COL18A1,HES1,IGF1R,MCL1,SFRP1,SOCS2
arsenite		chemical toxicant			0.0177	CCND1,MCL1
GH1		growth factor			0.018	IGF1R,SOCS2
RAC1		enzyme			0.018	CCND1,MCL1
CDKN1B		kinase			0.0182	CCND1,MCL1
tamoxifen		chemical drug			0.0186	CCND1,FADS1,HES1
MYC		transcription regulator		-1.131	0.019	ADAMTS1,Cald1,CCND1,HES1,MCL1,SFRP1
2-[[9-isopropyl-6-[[4-(2-pyridyl)phenyl]methylamino]purin-2-yl]amino]butan-1-ol		chemical - kinase inhibitor			0.0192	CCND1
7-(4-fluorobenzylamino)-1,3,4,8-tetrahydropyrrolo[4,3,2-de]quinolin-8(1H)-one		chemical reagent			0.0192	CCND1
Cu2+		chemical - endogenous mammalian			0.0192	CCND1
DYRK1B		kinase			0.0192	CCND1
L-serine		chemical - endogenous mammalian			0.0192	CCND1
LNX2		other			0.0192	HES1
MTF1		transcription regulator			0.0192	ADAMTS5
OIP5-AS1		other			0.0192	CCND1
PPBP		cytokine			0.0192	COL18A1
PTCSC3		other			0.0192	CCND1
RUVBL2		transcription regulator			0.0192	CCND1
SNHG20		other			0.0192	CCND1
UBR5		enzyme			0.0192	CCND1
USP9X		peptidase			0.0192	MCL1
Z-DEVD-FMK		chemical - protease inhibitor			0.0192	MCL1
adaphostin		chemical drug			0.0192	CCND1
bosutinib		chemical drug			0.0192	CCND1
buparlisib		chemical drug			0.0192	MCL1
clioquinol		chemical drug			0.0192	CCND1
echinomycin		chemical drug			0.0192	ADAMTS1
enterolactone		chemical - endogenous mammalian			0.0192	CCND1
manganese chloride		chemical reagent			0.0192	IGF1R
miR-378a-3p (and other miRNAs w/seed CUGGACU)		mature microrna			0.0192	IGF1R
pargyline		chemical drug			0.0192	MAP2
ruxolitinib		chemical drug			0.0192	MCL1
sapanisertib		chemical drug			0.0192	CCND1
dihydrotestosterone		chemical - endogenous mammalian		1.505	0.0197	ADAMTS1,CCND1,IGF1R,MME
Creb		group			0.0197	CCND1,HES1,MCL1
PRKCA		kinase			0.0197	CCND1,HES1
PSMB11		peptidase			0.0197	CCND1,EGFLAM
GNAQ		enzyme			0.0203	ADAMTS1,CCND1
FGF1		growth factor			0.0206	CCND1,CLPS
STAT5a/b		group			0.0206	CCND1,MCL1
mir-155		microrna			0.0206	CCND1,MME
BAG3		other			0.0209	MCL1
BEX2		other			0.0209	MAP2
CCNT1		transcription regulator			0.0209	CCND1
CIC		transcription regulator			0.0209	CCND1
CTNNBIP1		other			0.0209	CCND1
E2F8		transcription regulator			0.0209	CCND1
LMO4		transcription regulator			0.0209	CCND1
PITX1		transcription regulator			0.0209	CCND1
RB1CC1		other			0.0209	CCND1
S100A12		other			0.0209	CCND1
STAT1/3/5 dimer		complex			0.0209	SOCS2
UBA1		enzyme			0.0209	CCND1
cantharidin		chemical drug			0.0209	MCL1
clotrimazole		chemical drug			0.0209	CCND1
embelin		chemical - endogenous non-mammalian			0.0209	CCND1
midostaurin		chemical drug			0.0209	MCL1
myristoylated protein kinase A inhibitor 14-22 amide		chemical - kinase inhibitor			0.0209	CCND1
nordihydroguaiaretic acid		chemical drug			0.0209	IGF1R
quinacrine		chemical drug			0.0209	MCL1
zinostatin		biologic drug			0.0209	IGF1R
IRF2	0.068	transcription regulator			0.0212	CCND1,CFTR
KLF11		transcription regulator			0.0216	ADAMTS1,TIMP4
POU5F1		transcription regulator			0.0216	CCND1,IGF1R,MCL1
WNT5A		cytokine			0.0219	CCND1,IRF2
Mek		group			0.0221	CCND1,MCL1,MME
PITX2		transcription regulator			0.0222	CCND1,KCNQ1
1,2-dimethylhydrazine		chemical toxicant			0.0226	CCND1
AIF1		other			0.0226	CCND1
BCAR1		enzyme			0.0226	CCND1
CAMKK2		kinase			0.0226	CCND1
CREB3L2		transcription regulator			0.0226	MCL1
CSNK2B		kinase			0.0226	CCND1
EN1		transcription regulator			0.0226	CCND1
FOXD2-AS1		other			0.0226	HES1
FZR1		kinase			0.0226	CCND1
GPBAR1		g-protein coupled receptor			0.0226	CCND1
HBP1		transcription regulator			0.0226	CCND1
JARID2		transcription regulator			0.0226	CCND1
LMX1A		transcription regulator			0.0226	HES1
PPP5C		phosphatase			0.0226	CCND1
TLE1		transcription regulator			0.0226	MCL1
VEGFD		growth factor			0.0226	CCND1
dehydroepiandrosterone sulfate		chemical - endogenous mammalian			0.0226	CCND1
gambogic acid		chemical - endogenous non-mammalian			0.0226	CCND1
miR-101-3p (and other miRNAs w/seed ACAGUAC)		mature microrna			0.0226	MCL1
neomycin		chemical drug			0.0226	HES1
perhexiline		chemical drug			0.0226	HES1
vatalanib		chemical drug			0.0226	CCND1
Sb202190		chemical - kinase inhibitor			0.0228	CCND1,CFTR
docetaxel		chemical drug			0.0228	IGF1R,MCL1
miR-34a-5p (and other miRNAs w/seed GGCAGUG)		mature microrna			0.0228	CCND1,HID1
SRF		transcription regulator			0.023	Cald1,LBH,MCL1
STAT3		transcription regulator		0.915	0.0231	CCND1,IGF1R,MAP2,MCL1
BCR (complex)		complex			0.0235	CCND1,MCL1
MET		kinase			0.0235	CCND1,NREP
THRA		ligand-dependent nuclear receptor			0.0235	CCND1,RCAN2
IL1		group			0.0237	ADAMTS1,ADAMTS5,IGF1R
APC		enzyme			0.0238	CCND1,HES1
CASR		g-protein coupled receptor			0.0241	CCND1,LBH
IL22		cytokine			0.0241	CCND1,MCL1
n-nitrosomethylbenzylamine		chemical toxicant			0.0241	CCND1,MCL1
5'-methylthioadenosine		chemical - endogenous mammalian			0.0243	CCND1
ATXN7		other			0.0243	Marcks
Cd2+		chemical toxicant			0.0243	CCND1
E64d		chemical - protease inhibitor			0.0243	IGF1R
GON4L		transcription regulator			0.0243	CCND1
GTF2I		transcription regulator			0.0243	CCND1
HOXA4		transcription regulator			0.0243	CCND1
MGAT3		enzyme			0.0243	HES1
N1,N11-diethylnorspermine		chemical drug			0.0243	CCND1
NAE1		enzyme			0.0243	CCND1
NDUFA13		enzyme			0.0243	CCND1
PECAM1		other			0.0243	CCND1
Rac		group			0.0243	CCND1
SRSF3		other			0.0243	CCND1
TRAF4		other			0.0243	CCND1
anti-benzo(a)pyrene-diol-epoxide		chemical toxicant			0.0243	CCND1
dihydroartemisinin		chemical drug			0.0243	CCND1
mir-322		microrna			0.0243	IGF1R
mocetinostat		chemical drug			0.0243	MCL1
onapristone		chemical drug			0.0243	ADAMTS1
salmeterol		chemical drug			0.0243	CFTR
CD28		transmembrane receptor			0.0244	CCND1,IGF1R,SOCS2
bucladesine		chemical toxicant			0.0244	ADAMTS1,CCND1,IGF1R
MTOR		kinase			0.0247	CCND1,MAP2,MCL1
FOXM1		transcription regulator			0.0248	CCND1,SFRP1
ITGB1		transmembrane receptor			0.0248	ADAMTS5,SPON1
IL2		cytokine			0.0251	CCND1,MCL1,MME,SOCS2
SOX11		transcription regulator			0.0251	CCND1,NREP
curcumin		chemical drug			0.0255	ADAMTS5,CCND1,MCL1
ADRB		group			0.0258	CCND1,LBH
1'-acetoxychavicol acetate		chemical reagent			0.026	CCND1
AZD8055		chemical drug			0.026	MCL1
Betacatenin/TCF		complex			0.026	CCND1
CDH2		other			0.026	CCND1
GHRHR		g-protein coupled receptor			0.026	CCND1
IGFBP7		transporter			0.026	CCND1
KIF1B		transporter			0.026	CCND1
L-685,458		chemical - protease inhibitor			0.026	HES1
Mn(III)-tetrakis-(4-benzoic acid) porphyrin		chemical reagent			0.026	MCL1
N-carbobenzyloxy-leucine-leucine-norvalinal		chemical - protease inhibitor			0.026	MCL1
NRP1		transmembrane receptor			0.026	MCL1
NUP98-KDM5A		fusion gene/product			0.026	MCL1
NUP98-NSD1		fusion gene/product			0.026	MCL1
Nkx2-2os		other			0.026	CCND1
PER2		transcription regulator			0.026	CCND1
PLCG1		enzyme			0.026	CCND1
Retnla		other			0.026	HES1
SP2		transcription regulator			0.026	CCND1
TBX3		transcription regulator			0.026	LBH
TCF/LEF		group			0.026	CCND1
THRAP3		transcription regulator			0.026	CCND1
cyproterone acetate		chemical drug			0.026	CCND1
gamma-tocotrienol		chemical drug			0.026	CCND1
leupeptin		chemical - protease inhibitor			0.026	IGF1R
lonafarnib		chemical drug			0.026	CCND1
miR-19b-3p (and other miRNAs w/seed GUGCAAA)		mature microrna			0.026	CCND1
mir-140		microrna			0.026	ADAMTS5
pyridoxine		chemical - endogenous mammalian			0.026	SFRP1
zinc protoporphyrin IX		chemical - endogenous mammalian			0.026	CCND1
HDAC2		transcription regulator			0.0261	LIG1,SFRP1
SYVN1		transporter			0.0261	CCND1,IGF1R
mir-223		microrna			0.0261	CCND1,IGF1R
testosterone		chemical - endogenous mammalian			0.0264	CCND1,CLCN3,IGF1R
2-amino-5-phosphonovaleric acid		chemical - other			0.0264	ADAMTS1,LBH
TERT		enzyme			0.0268	CCND1,SPON1
hydrocortisone		chemical - endogenous mammalian			0.0271	CCND1,SFRP1
TCR		complex			0.0277	CCND1,MCL1,SOCS2
2-acetylaminofluorene		chemical toxicant			0.0277	CCND1
C1QBP		transcription regulator			0.0277	CCND1
CAMK2D		kinase			0.0277	ADAMTS5
DIRAS3		enzyme			0.0277	CCND1
EPHX2		enzyme			0.0277	HES1
H1-2		other			0.0277	CCND1
KLF9		transcription regulator			0.0277	CCND1
MIR101		group			0.0277	MCL1
PRDX2		enzyme			0.0277	CCND1
SFRP4		transmembrane receptor			0.0277	CCND1
STK3		kinase			0.0277	CCND1
TMEM8B		other			0.0277	CCND1
aroclor 1254		chemical toxicant			0.0277	MAP2
epothilone B		chemical drug			0.0277	MCL1
mannose		chemical - endogenous mammalian			0.0277	MCL1
mevastatin		chemical drug			0.0277	ADAMTS1
myricetin		chemical - endogenous non-mammalian			0.0277	CCND1
prostaglandin A2		chemical - endogenous non-mammalian			0.0277	CCND1
Notch		group			0.0278	HES1,MCL1
Tnf (family)		group			0.0282	ADAMTS5,CCND1
PRKAA1		kinase			0.0285	IGF1R,MAP2
halofuginone		chemical drug			0.0285	HES1,PRELP
cycloheximide		chemical reagent			0.0286	CCND1,MCL1,MME
7-nitroindazole		chemical reagent			0.0294	MAP2
ACSL5		enzyme			0.0294	MAP2
CCAT2		other			0.0294	CCND1
DAXX		transcription regulator			0.0294	CCND1
DDX17		enzyme			0.0294	CCND1
DDX3X		enzyme			0.0294	CCND1
GPI		enzyme			0.0294	CCND1
Integrin		complex			0.0294	CCND1
MDK		growth factor			0.0294	Cald1
NCAM1		other			0.0294	MAP2
NEDD4		enzyme			0.0294	MCL1
NFkB (family)		group			0.0294	CCND1
PPP1R1B		phosphatase			0.0294	CCND1
decursin		chemical - endogenous non-mammalian			0.0294	CCND1
ethidium		chemical drug			0.0294	CCND1
mir-194		microrna			0.0294	SOCS2
mir-7		microrna			0.0294	IGF1R
p85 (pik3r)		group			0.0294	MCL1
palbociclib		chemical drug			0.0294	CCND1
zearalenone		chemical toxicant			0.0294	CCND1
JUNB		transcription regulator			0.0296	CCND1,HES1
RBPJ		transcription regulator			0.0296	CCND1,HES1
AHR		ligand-dependent nuclear receptor			0.0296	ADAMTS5,CCND1,HES1
cytokine		group			0.0299	CCND1,SOCS2
LEF1		transcription regulator			0.031	CCND1,IGF1R
aldosterone		chemical - endogenous mammalian			0.031	ADAMTS1,IGF1R
AKR1B1		enzyme			0.0312	CCND1
ATP2A2		transporter			0.0312	CCND1
CD22		transmembrane receptor			0.0312	MCL1
DLK1		other			0.0312	IGF1R
GLIS2		transcription regulator			0.0312	CCND1
HOTAIRM1		other			0.0312	KCNQ1
ITGAL		transmembrane receptor			0.0312	HES1
MK2206		chemical drug			0.0312	CCND1
N(6)-(3-iodobenzyl)-5'-N-methylcarboxamidoadenosine		chemical drug			0.0312	CCND1
PADI2		enzyme			0.0312	ADAMTS9
PARP9		enzyme			0.0312	IRF2
PDGFRA		kinase			0.0312	MCL1
Pdgf Ab		complex			0.0312	CCND1
TFEC		transcription regulator			0.0312	IGF1R
XPO1		transporter			0.0312	CCND1
acyclic retinoid		chemical drug			0.0312	CCND1
alpha-amanitin		chemical toxicant			0.0312	CCND1
glycine		chemical - endogenous mammalian			0.0312	CCND1
indirubin		chemical drug			0.0312	CCND1
melphalan		chemical drug			0.0312	MCL1
mir-154		microrna			0.0312	CCND1
MED1		transcription regulator			0.0317	CCND1,MCL1
CD38		enzyme			0.0325	CLCN3,SOCS2
EGR2		transcription regulator			0.0328	MAP2,MME
ACTB		other			0.0329	Cald1
ACTN4		transcription regulator			0.0329	CCND1
CHEK1		kinase			0.0329	MCL1
CTBP2		transcription regulator			0.0329	CCND1
DAG1		transmembrane receptor			0.0329	EGFLAM
Fgfr		group			0.0329	MCL1
GAS5		other			0.0329	CCND1
IL31		other			0.0329	SOCS2
ITGB4		transmembrane receptor			0.0329	CCND1
KCNIP3		transcription regulator			0.0329	CCND1
MST1R		kinase			0.0329	CCND1
MUC4		other			0.0329	CCND1
NUMB		other			0.0329	HES1
PTPN2		phosphatase			0.0329	CCND1
ethosuximide		chemical drug			0.0329	CCND1
idarubicin		chemical drug			0.0329	MCL1
lycopene		chemical drug			0.0329	CCND1
miR-503-5p (miRNAs w/seed AGCAGCG)		mature microrna			0.0329	CCND1
mir-203		microrna			0.0329	HES1
riboflavin		chemical - endogenous mammalian			0.0329	SFRP1
thioridazine		chemical drug			0.0329	MCL1
trastuzumab		biologic drug			0.0329	CCND1
vanadate		chemical - other			0.0329	CCND1
INS		other			0.0332	CCND1,IGF1R
VCAN		other			0.0332	ADAMTS9,PRELP
ethanol		chemical - endogenous mammalian			0.0337	CCND1,MAP2,MME
miR-155-5p (miRNAs w/seed UAAUGCU)		mature microrna			0.034	CCND1,FADS1
FOXA1		transcription regulator			0.0343	CFTR,COL18A1
nitrofurantoin		chemical drug			0.0343	ADAMTS1,CCND1
ADRB1		g-protein coupled receptor			0.0346	Marcks
CCND3		kinase			0.0346	CCND1
CDK1		kinase			0.0346	MAP2
CSNK2A1		kinase			0.0346	CCND1
DHX9		enzyme			0.0346	CCND1
GDF15		growth factor			0.0346	CCND1
KLF10		transcription regulator			0.0346	CCND1
PHLPP1		enzyme			0.0346	MCL1
PIM2		kinase			0.0346	CCND1
PPP1R15A		other			0.0346	CCND1
PTP4A3		phosphatase			0.0346	IGF1R
RPA1		other			0.0346	NAV2
S1PR1		g-protein coupled receptor			0.0346	CCND1
SAV1		other			0.0346	CCND1
STAP2		other			0.0346	CCND1
WWOX		enzyme			0.0346	TIMP4
dactolisib		chemical drug			0.0346	MCL1
miR-296-5p (miRNAs w/seed GGGCCCC)		mature microrna			0.0346	CCND1
mir-192		microrna			0.0346	IGF1R
salvin		chemical toxicant			0.0346	CCND1
sulfasalazine		chemical drug			0.0346	CCND1
TWIST1		transcription regulator			0.0347	ADAMTS1,MME
DNMT3A		enzyme			0.0359	ADAMTS9,RCAN2
IGF2		growth factor			0.0359	CCND1,IGF1R
ABT-737		chemical drug			0.0362	MCL1
AXIN1		other			0.0362	CCND1
Aldose Reductase		group			0.0362	CCND1
EDN3		other			0.0362	CCND1
FOXF1		transcription regulator			0.0362	CCND1
HDAC7		transcription regulator			0.0362	CCND1
Hmgb1		transcription regulator			0.0362	CCND1
MSX1		transcription regulator			0.0362	SFRP1
PARG		enzyme			0.0362	SOCS2
PCDH11Y		other			0.0362	CCND1
PD 169316		chemical - kinase inhibitor			0.0362	CCND1
PER1		transcription regulator			0.0362	CCND1
Ras homolog		group			0.0362	CCND1
SIN3B		transcription regulator			0.0362	HES1
SPZ1		transcription regulator			0.0362	CCND1
SRA1		transcription regulator			0.0362	HES1
TNFRSF11A		transmembrane receptor			0.0362	MME
YWHAZ		enzyme			0.0362	MCL1
epirubicin		chemical drug			0.0362	CCND1
trametinib		chemical drug			0.0362	IGF1R
raloxifene		chemical drug			0.0363	CCND1,HES1
INSR		kinase			0.0371	CCND1,IGF1R,SOCS2
OGA		enzyme			0.0374	ADAMTS5,CCND1,SOCS2
ACVR1C		kinase			0.0379	CCND1
CCN3		growth factor			0.0379	HES1
CXCR3		g-protein coupled receptor			0.0379	CFTR
EPCAM		other			0.0379	CCND1
GLP-1-(7-34)-amide		biologic drug			0.0379	IGF1R
GRN		growth factor			0.0379	CCND1
IKK (complex)		complex			0.0379	CCND1
IgG1		complex			0.0379	MCL1
MAP3K5		kinase			0.0379	CCND1
MAPK12		kinase			0.0379	CCND1
MAPK8IP1		other			0.0379	CCND1
MFSD2A		transporter			0.0379	FADS1
MTM1		phosphatase			0.0379	IGF1R
NFIX		transcription regulator			0.0379	CCND1
PARPBP		other			0.0379	SPON1
PDGFC		growth factor			0.0379	CCND1
SLC2A4		transporter			0.0379	MCL1
SLC9A3R1		other			0.0379	CFTR
TRPC1		ion channel			0.0379	CCND1
branched chain amino acids		chemical drug			0.0379	MCL1
cis-urocanic acid		chemical drug			0.0379	ADAMTS1
miR-7a-5p (and other miRNAs w/seed GGAAGAC)		mature microrna			0.0379	IGF1R
salinosporamide A		chemical drug			0.0379	CCND1
IL21		cytokine			0.0386	MCL1,SOCS2
aspirin		chemical drug			0.0386	CCND1,MCL1
STAT6		transcription regulator			0.0387	CLPS,FADS1,SOCS2
9Z,11E-octadecadienoic acid		chemical - endogenous mammalian			0.0396	FADS1
CNR2		g-protein coupled receptor			0.0396	CCND1
DYRK1A		kinase			0.0396	CCND1
FOXF2		transcription regulator			0.0396	CCND1
HTATIP2		transcription regulator			0.0396	CCND1
IGFBP5		other			0.0396	CCND1
LMX1B		transcription regulator			0.0396	HES1
LOX		enzyme			0.0396	IGF1R
PHB		transcription regulator			0.0396	CCND1
TF		transporter			0.0396	CCND1
TFPI2		other			0.0396	CCND1
miR-18a-5p (and other miRNAs w/seed AAGGUGC)		mature microrna			0.0396	CCND1
2-(4-amino-1-isopropyl-1H-pyrazolo[3,4-d]pyrimidin-3-yl)-1H-indol-5-ol		chemical reagent			0.0406	ADAMTS1,CCND1
MRTFA		transcription regulator			0.0406	MAP2,NREP
CEBPB		transcription regulator			0.0408	CCND1,CFTR,TIMP4
4-hydroxytamoxifen		chemical drug			0.041	CCND1,IGF1R
1-methyl-4-phenylpyridinium		chemical toxicant			0.0413	CCND1
BTRC		enzyme			0.0413	CCND1
Ciap		group			0.0413	CCND1
Ikb		group			0.0413	CCND1
LCAT		enzyme			0.0413	CCND1
Mt2		other			0.0413	CCND1
SMARCC1		transcription regulator			0.0413	CCND1
THZ1		chemical - kinase inhibitor			0.0413	MCL1
TNFRSF11B		transmembrane receptor			0.0413	IGF1R
WNT7A		cytokine			0.0413	LBH
bilirubin		chemical - endogenous mammalian			0.0413	CCND1
diosgenin		chemical - endogenous non-mammalian			0.0413	CCND1
miR-23a-3p (and other miRNAs w/seed UCACAUU)		mature microrna			0.0413	HES1
mir-26		microrna			0.0413	MCL1
paroxetine		chemical drug			0.0413	MAP2
zerumbone		chemical - endogenous non-mammalian			0.0413	CCND1
IL18		cytokine			0.0414	ADAMTS5,SOCS2
EP300		transcription regulator			0.0415	CCND1,IGF1R,MME
15-deoxy-delta-12,14 -PGJ 2		chemical - endogenous mammalian			0.0418	CCND1,MCL1
thyroid hormone		chemical - endogenous mammalian			0.0418	CCND1,IRF2
PTGS2		enzyme			0.0422	CCND1,MCL1
metribolone		chemical reagent			0.0424	ADAMTS1,CCND1,IGF1R
8-bromo-cAMP		chemical reagent			0.0426	CCND1,IGF1R
doxorubicin		chemical drug			0.0427	ADAMTS1,CCND1,MCL1
BIRC3		enzyme			0.043	MCL1
BTG2		transcription regulator			0.043	CCND1
GHRH		other			0.043	CCND1
HEXIM1		transcription regulator			0.043	CCND1
NODAL		growth factor			0.043	CCND1
NR2C2		ligand-dependent nuclear receptor			0.043	CCND1
P2RY2		g-protein coupled receptor			0.043	CCND1
SOX6		transcription regulator			0.043	CCND1
Smad		complex			0.043	MCL1
XIAP		enzyme			0.043	CCND1
calpain		complex			0.043	CCND1
ceruletide		biologic drug			0.043	MME
deoxycorticosterone acetate		chemical drug			0.043	Cald1
mir-214		microrna			0.043	IGF1R
piceatannol		chemical - endogenous non-mammalian			0.043	CCND1
plumbagin		chemical toxicant			0.043	CCND1
EGR1		transcription regulator			0.0439	CCND1,IGF1R
AZGP1		transporter			0.0447	CCND1
BAG1		other			0.0447	CCND1
CARD11		kinase			0.0447	MME
CDC73		other			0.0447	CCND1
DCAF1		kinase			0.0447	SOCS2
FGF9		growth factor			0.0447	CCND1
HMGB2		transcription regulator			0.0447	CCND1
HSPD1		enzyme			0.0447	IGF1R
KAT2A		enzyme			0.0447	CCND1
KN-62		chemical - kinase inhibitor			0.0447	CCND1
LTBP1		other			0.0447	MCL1
MST1		growth factor			0.0447	CCND1
NfkB1-RelA		complex			0.0447	CCND1
PSMD10		transcription regulator			0.0447	CCND1
Trp53cor1		other			0.0447	MCL1
cyanocobalamin		chemical - endogenous mammalian			0.0447	SFRP1
methyl-beta-cyclodextrin		chemical drug			0.0447	CCND1
miR-223-3p (miRNAs w/seed GUCAGUU)		mature microrna			0.0447	CCND1
mir-8		microrna			0.0447	ADAMTS1,CCND1
MAP2K1		kinase			0.0455	CCND1,IGF1R
Interferon alpha		group			0.0456	CCND1,MCL1,SOCS2
ATOH1		transcription regulator			0.0464	HES1
BCAP31		transporter			0.0464	CFTR
BGN		other			0.0464	CCND1
CTSB		peptidase			0.0464	CCND1
DTX1		transcription regulator			0.0464	MCL1
ESRRB		ligand-dependent nuclear receptor			0.0464	MCL1
LIN28A		other			0.0464	CCND1
Mt1		other			0.0464	CCND1
NOTCH4		transcription regulator			0.0464	HES1
PROCR		other			0.0464	CCND1
PTPN22		phosphatase			0.0464	OSMR
SLC9A3		ion channel			0.0464	CCND1
ceramide		chemical - endogenous mammalian			0.0464	SFRP1
mir-148		microrna			0.0464	IGF1R
p70 S6k		group			0.0464	CCND1
progestin		chemical drug			0.0464	CCND1
GATA6		transcription regulator			0.0472	Cald1,HES1
PPARA		ligand-dependent nuclear receptor			0.0473	CCND1,FADS1,SOCS2
ELOVL5		enzyme			0.048	FADS1
MALP-2s		chemical reagent			0.048	MCL1
Mir122a,b		group			0.048	IGF1R
TAF6		transcription regulator			0.048	HES1
TLX1		transcription regulator			0.048	MCL1
TRIM37		enzyme			0.048	SFRP1
apomorphine		chemical drug			0.048	IGF1R
phorbol 12,13-didecanoate		chemical toxicant			0.048	MCL1
NRAS		enzyme			0.0481	CCND1,MCL1
TGFBR2		kinase			0.0481	ADAMTS5,CCND1
CXCL12		cytokine			0.0485	CCND1,SOCS2
LEP		growth factor			0.0488	CCND1,HES1,MCL1
B2M		transmembrane receptor			0.0497	IGF1R
DLL1		enzyme			0.0497	HES1
GRP		growth factor			0.0497	CCND1
HOXB13		transcription regulator			0.0497	CCND1
NFIC		transcription regulator			0.0497	CCND1
PTCH1		transmembrane receptor			0.0497	CCND1
ROCK1		kinase			0.0497	CCND1
S100A6		transporter			0.0497	ADAMTS1
SUB1		transcription regulator			0.0497	CCND1
crizotinib		chemical drug			0.0497	OSMR
dasatinib		chemical drug			0.0497	MCL1
letrozole		chemical drug			0.0497	CCND1
methylnitronitrosoguanidine		chemical toxicant			0.0497	CCND1
miR-26a-5p (and other miRNAs w/seed UCAAGUA)		mature microrna			0.0497	MAP2
selumetinib		chemical drug			0.0497	CCND1
stearic acid		chemical - endogenous mammalian			0.0497	MCL1

## Sheet: M34_C1vC0
© 2000-2020 QIAGEN. All rights reserved.
Upstream Regulator	Expr Log Ratio	Molecule Type	Predicted Activation State	Activation z-score	p-value of overlap	Target molecules in dataset	Mechanistic Network
estrogen receptor		group		-0.128	1.08e-05	FGF12,FGFR2,FGFR3,PDGFC,SMAD3,VEGFA
E. coli serotype 0127B8 lipopolysaccharide		chemical - endogenous non-mammalian		-0.447	3.09e-05	Acot1,FGF12,PPP1R1B,SMAD3,VEGFA
nitrofen		chemical toxicant			5.83e-05	FGFR2,FGFR3,VEGFA
PRKAA2		kinase		-1.982	6.87e-05	FGFR2,MYLK,SMAD3,TNS1
IL1B		cytokine	Activated	2.045	0.000105	FGFR2,FGFR3,GAS6,LBP,MFAP2,MYLK,SLC22A4,SMAD3,VEGFA	AR,IL1B,NFkB (complex),SP1
miR-140-5p (and other miRNAs w/seed AGUGGUU)		mature microrna			0.000107	SMAD3,VEGFA
glucagon		biologic drug			0.000197	CGNL1,PPP1R1B,TNS1
PRKAA1		kinase		-1.982	0.00022	FGFR2,MYLK,SMAD3,TNS1
TWIST1		transcription regulator		-0.52	0.000331	FGFR2,FGFR3,OSGIN1,VEGFA
PTH		other		1.109	0.000362	CGNL1,PPP1R1B,SMAD3,TNS1
THY1		other			0.000512	GAS6,VEGFA
AR		ligand-dependent nuclear receptor		0.993	0.00052	FGFR2,GAS6,LAMC3,SLC22A4,SMAD3,VEGFA	AR,NFkB (complex),SP1
PKD1		ion channel		-1.067	0.000691	AADAC,FGFR3,PAH,TNS1
CALCA		other			0.000857	CGNL1,PPP1R1B,TNS1
desmopressin		biologic drug			0.000857	CGNL1,PPP1R1B,TNS1
TAF4		transcription regulator			0.000884	GAS6,PDGFC,WWC1
AHR		ligand-dependent nuclear receptor		-1.091	0.000939	FGFR2,GAS6,LBP,TNFRSF19,VEGFA
K-252		chemical drug			0.00121	PPP1R1B,VEGFA
RUNX1		transcription regulator			0.00147	SHANK2,SLC22A4,ST3GAL5,VEGFA
ERBB3		kinase			0.00153	GAS6,TNS1,VEGFA
progesterone		chemical - endogenous mammalian		0.141	0.00154	Acot1,FGFR2,GAS6,PPP1R1B,RAB27B,VEGFA
LLGL2		other			0.00161	GAS6,TNS1
NFkB (complex)		complex	Activated	2.213	0.00164	GAS6,MYLK,NUAK2,SLC22A4,SMAD3,VEGFA	AR,NFkB (complex),SP1
NCOA4		transcription regulator			0.00183	FGFR2,FGFR3
ROR1		kinase			0.00183	GAS6,TNS1
Stat3-Stat3		complex			0.00183	LBP,VEGFA
RUNX2		transcription regulator			0.00195	FGFR2,ST3GAL5,VEGFA
GJA1		transporter			0.00195	FGFR3,VEGFA
2,3-pentanedione		chemical - endogenous non-mammalian			0.00198	VEGFA
CDG2-cRGD-5		chemical reagent			0.00198	VEGFA
COL6A3		other			0.00198	WWC1
GJB2		transporter			0.00198	FGFR3
GPX6		enzyme			0.00198	PPP1R1B
Ikzf1		transcription regulator			0.00198	FGFR3
OPN4		g-protein coupled receptor			0.00198	VEGFA
PIK3C2A		kinase			0.00198	VEGFA
PLXND1		transmembrane receptor			0.00198	VEGFA
Peg3		other			0.00198	VEGFA
SU5614		chemical - kinase inhibitor			0.00198	VEGFA
homocysteine thiolactone		chemical - endogenous mammalian			0.00198	VEGFA
miR-147a (miRNAs w/seed UGUGUGG)		mature microrna			0.00198	VEGFA
miR-504-5p (and other miRNAs w/seed GACCCUG)		mature microrna			0.00198	VEGFA
norethynodrel		chemical toxicant			0.00198	VEGFA
pectin		chemical drug			0.00198	SMAD3
potassium ferricyanide		chemical toxicant			0.00198	VEGFA
sapropterin		chemical drug			0.00198	VEGFA
styrofoam		chemical reagent			0.00198	VEGFA
tetrabenazine		chemical drug			0.00198	PPP1R1B
thalidomide analog 1		chemical reagent			0.00198	VEGFA
thalidomide analog 2		chemical reagent			0.00198	VEGFA
levodopa		chemical - endogenous mammalian		0.816	0.00203	C9orf24,DDIT4L,PPP1R1B,SPOCK3,ST3GAL5,TNFRSF19
CRNDE		other			0.00232	FGFR3,VEGFA
CTF1		cytokine			0.00244	LBP,MYLK
NDRG1		kinase			0.00244	SMAD3,VEGFA
Histone h3		group			0.00246	FGFR2,OSGIN1,RAB27B,VEGFA,VKORC1
cilostazol		chemical drug			0.00258	PDGFC,VEGFA
mevalonic acid		chemical - endogenous mammalian			0.00258	SMAD3,VEGFA
NSUN6		enzyme			0.00271	GAS6,TNS1
TGFB1		growth factor		1.371	0.00291	Acot1,FGF12,FGFR2,MFAP2,MYLK,PDGFC,PPP1R1B,SMAD3,ST3GAL5,VEGFA
Notch		group			0.00314	MYLK,SMAD3,VEGFA
H89		chemical - kinase inhibitor			0.00339	PDE3B,SMAD3,VEGFA
SMAD7		transcription regulator			0.00339	GAS6,SMAD3,VEGFA	AR,NFkB (complex),SMAD7,SP1
TXNIP		other			0.0036	Acot1,VEGFA
medroxyprogesterone acetate		chemical drug			0.00378	C9orf24,MYLK,VEGFA
kainic acid		chemical toxicant			0.00391	FGFR2,FGFR3,VEGFA
1,2-dihydroxy-epoxy-1,2,3,4-tetrahydro-5-methylchrysene		chemical toxicant			0.00396	VEGFA
ADAMTS9		peptidase			0.00396	VEGFA
ADGRG1		g-protein coupled receptor			0.00396	VEGFA
ATP9A		transporter			0.00396	VEGFA
CDK11B		kinase			0.00396	VEGFA
CNMD		other			0.00396	VEGFA
MAP4		other			0.00396	VEGFA
PCBD1		transcription regulator			0.00396	PAH
PSG1		other			0.00396	VEGFA
SALL1		transcription regulator			0.00396	VEGFA
SEMA4A		other			0.00396	VEGFA
TCHP		other			0.00396	VEGFA
UCN3		other			0.00396	VEGFA
ZFP36L1		transcription regulator			0.00396	VEGFA
diethyl fumarate		chemical reagent			0.00396	VEGFA
indapamide		chemical drug			0.00396	VEGFA
neocuproine		chemical reagent			0.00396	VEGFA
norethindrone		chemical drug			0.00396	VEGFA
toluene diisocyanate		chemical toxicant			0.00396	VEGFA
TCF7L2		transcription regulator			0.00407	FGFR2,SYDE2,TNS1,VEGFA
VCAN		other			0.00412	LBP,SMAD3,VEGFA
FOXO3		transcription regulator			0.00457	Acot1,FGFR2,PDE3B,VEGFA
platelet activating factor		chemical - endogenous mammalian			0.00514	GAS6,VEGFA
SP1		transcription regulator			0.00528	MYLK,PDGFC,SLC22A4,SMAD3,VEGFA
DCN		other			0.00533	SMAD3,VEGFA
MRTFA		transcription regulator			0.0056	MYLK,RAB27B,SPOCK3
RARA		ligand-dependent nuclear receptor			0.00575	DHRS3,FGF12,SHANK2,SMAD3
17alpha-hydroxyprogesterone caproate		chemical drug			0.00593	VEGFA
CTBP1-DT		other			0.00593	SMAD3
FERMT3		enzyme			0.00593	VEGFA
HOXB8		transcription regulator			0.00593	MYLK
Hspg		group			0.00593	VEGFA
IGF receptor		group			0.00593	VEGFA
IRS		group			0.00593	VEGFA
KRT5		other			0.00593	VEGFA
SRSF5		other			0.00593	VEGFA
STK16		kinase			0.00593	VEGFA
UPP1		enzyme			0.00593	Acot1
albendazole		chemical drug			0.00593	VEGFA
istradefylline		chemical drug			0.00593	PPP1R1B
miR-2682-5p (and other miRNAs w/seed AGGCAGU)		mature microrna			0.00593	VEGFA
miR-520g-3p (and other miRNAs w/seed CAAAGUG)		mature microrna			0.00593	VEGFA
nickel subsulfide		chemical toxicant			0.00593	VEGFA
recombinant interferon gamma		biologic drug			0.00593	FGFR2
titanium		chemical reagent			0.00593	VEGFA
cocaine		chemical drug			0.00668	Acot1,PPP1R1B,VEGFA
troglitazone		chemical drug		1.922	0.00711	Acot1,DHRS3,PDE3B,VEGFA	CREBBP,troglitazone
napabucasin		chemical drug			0.00715	FGFR2,WWC1
CREBBP		transcription regulator			0.00757	DHRS3,FGFR3,PDE3B,VEGFA
2,4-diamino-6-hydroxypyrimidine		chemical reagent			0.0079	VEGFA
Bc1		translation regulator			0.0079	SMAD3
CCNA1		other			0.0079	VEGFA
CYP11B2		enzyme			0.0079	VEGFA
FBLN2		other			0.0079	VEGFA
Meg3		other			0.0079	VEGFA
SLCO1C1		transporter			0.0079	VEGFA
ZKSCAN3		transcription regulator			0.0079	VEGFA
goserelin		biologic drug			0.0079	VEGFA
miR-379-5p (and other miRNAs w/seed GGUAGAC)		mature microrna			0.0079	VEGFA
miR-515-5p (and other miRNAs w/seed UCUCCAA)		mature microrna			0.0079	FGFR2
MSTN		growth factor			0.00827	SMAD3,VEGFA
SOX9		transcription regulator			0.00827	LBP,VEGFA
clopidogrel		chemical drug			0.0085	DHRS3,VEGFA
TP73		transcription regulator		1.982	0.00868	DHRS3,FGFR2,FGFR3,VEGFA
FGF7		growth factor			0.00898	FGFR2,VEGFA
SOX1		transcription regulator			0.00922	TNFRSF19,VEGFA
FGF2		growth factor		1.241	0.00973	FGFR2,FGFR3,PDGFC,VEGFA
ARID2		transcription regulator			0.00987	FGFR2
Cpla2		group			0.00987	VEGFA
Cr6+		chemical reagent			0.00987	VEGFA
GJB1		transporter			0.00987	VEGFA
Hottip		other			0.00987	SMAD3
L-alpha-lysophosphatidylcholine, palmitoyl		chemical - endogenous mammalian			0.00987	VEGFA
NAA10		enzyme			0.00987	VEGFA
PLIN2		other			0.00987	Acot1
PPP2R2A		phosphatase			0.00987	SLC22A4
PPP2R5B		phosphatase			0.00987	SLC22A4
RAR-RXR		complex			0.00987	VEGFA
SEMA3F		other			0.00987	VEGFA
SRSF6		other			0.00987	VEGFA
WSB1		other			0.00987	VEGFA
atrasentan		chemical drug			0.00987	VEGFA
dynasore		chemical reagent			0.00987	VEGFA
miR-374b-5p (and other miRNAs w/seed UAUAAUA)		mature microrna			0.00987	VEGFA
orantinib		chemical drug			0.00987	VEGFA
PAX3-FOXO1		fusion gene/product			0.01	FGFR2,SMAD3,ST3GAL5
ERBB2		kinase		1.117	0.0104	GAS6,KIFC3,MFAP2,SMAD3,VEGFA,WWC1
TNF		cytokine	Activated	2.428	0.0105	DHRS3,FGFR2,LBP,MYLK,NUAK2,SLC22A4,SMAD3,ST3GAL5,VEGFA
IL13		cytokine		1.172	0.0109	FGFR3,GAS6,PDGFC,TNS1
SOX3		transcription regulator			0.011	TNFRSF19,VEGFA
pirinixic acid		chemical toxicant		1.954	0.0116	AADAC,Acot1,ST3GAL5,VEGFA
TO-901317		chemical reagent			0.0116	Acot1,SMAD3,VEGFA
CNTF		cytokine			0.0118	LBP,PPP1R1B
GMNN		transcription regulator			0.0118	TNFRSF19,VEGFA
ANGPTL6		other			0.0118	VEGFA
ANKHD1/ANKHD1-EIF4EBP3		other			0.0118	VEGFA
DLX4		transcription regulator			0.0118	VEGFA
DNAJA3		other			0.0118	VEGFA
EGTA acetoxymethyl ester		chemical reagent			0.0118	VEGFA
ELP1		other			0.0118	VEGFA
FGF13		growth factor			0.0118	VEGFA
N-retinylidene-N-retinylethanolamine		chemical - endogenous mammalian			0.0118	VEGFA
OMP-52M51		biologic drug			0.0118	VEGFA
PIWIL4		other			0.0118	FGFR2
PPP1R14B		phosphatase			0.0118	VEGFA
PROK2		other			0.0118	VEGFA
Paxip1		other			0.0118	VEGFA
SHOX2		transcription regulator			0.0118	FGFR2
SRPK1		kinase			0.0118	VEGFA
ZMYND10		other			0.0118	VEGFA
alpha-estradiol		chemical - endogenous mammalian			0.0118	VEGFA
bepafant		chemical reagent			0.0118	VEGFA
SMAD4		transcription regulator			0.0126	FGFR3,SMAD3,VEGFA
ERK		group			0.0129	MYLK,PDGFC,VEGFA
haloperidol		chemical drug			0.0129	PPP1R1B,VEGFA
PPARA		ligand-dependent nuclear receptor		1.195	0.0131	AADAC,Acot1,PAH,VEGFA
MYOC		other			0.0132	MFAP2,RAB27B
NCOA3		transcription regulator			0.0135	FGFR2,VEGFA
MYOCD		transcription regulator			0.0138	MYLK,VEGFA
tretinoin		chemical - endogenous mammalian	Activated	2.432	0.0138	DHRS3,FGF12,LBP,PPP1R1B,SHANK2,SMAD3,TNFRSF19,VEGFA
10-hydroxy-cis-12-octadecenoic acid		chemical reagent			0.0138	MYLK
12-hydroxyeicosatetraenoic acid		chemical - endogenous mammalian			0.0138	VEGFA
BMP type I receptor kinase inhibitor compound A		chemical - kinase inhibitor			0.0138	VEGFA
CYP4F2		enzyme			0.0138	VEGFA
FZD5		g-protein coupled receptor			0.0138	VEGFA
GNE		kinase			0.0138	ST3GAL5
ITGB8		other			0.0138	SMAD3
NKX3-2		transcription regulator			0.0138	FGFR3
PDCD10		other			0.0138	VEGFA
PDGFD		growth factor			0.0138	VEGFA
atropine		chemical drug			0.0138	VEGFA
dacarbazine		chemical drug			0.0138	VEGFA
mir-374		microrna			0.0138	VEGFA
sulfinosine		chemical reagent			0.0138	VEGFA
urotensin II		biologic drug			0.0138	SMAD3
PPARD		ligand-dependent nuclear receptor			0.0142	GAS6,ST3GAL5,VEGFA
TP63		transcription regulator			0.0151	FGFR2,FGFR3,SMAD3,VEGFA
1,3-bis(4-hydroxyphenyl)-4-methyl-5-[4-(2-piperidinylethoxy)phenol]-1H-pyrazole		chemical reagent			0.0157	VEGFA
APBA3		transporter			0.0157	VEGFA
EFEMP1		enzyme			0.0157	VEGFA
GW 5074		chemical - kinase inhibitor			0.0157	FGFR2
HS6ST1		enzyme			0.0157	VEGFA
IL18BP		other			0.0157	VEGFA
LAMA4		enzyme			0.0157	VEGFA
NEU3		enzyme			0.0157	ST3GAL5
PADI4		enzyme			0.0157	OSGIN1
PLA2G5		enzyme			0.0157	VEGFA
WNT7B		other			0.0157	VEGFA
alpha-tocopherol succinate		chemical drug			0.0157	VEGFA
cosyntropin		biologic drug			0.0157	VEGFA
isocoumarin NM-3		chemical drug			0.0157	VEGFA
norgestrel		chemical drug			0.0157	VEGFA
uridine		chemical - endogenous mammalian			0.0157	Acot1
cyclic AMP		chemical - endogenous mammalian			0.0158	MYLK,PAH,PPP1R1B
LDL		complex			0.016	GAS6,SMAD3,VEGFA
NRG1		growth factor			0.0165	GAS6,TNS1,VEGFA
PLA2G10		enzyme			0.0165	DHRS3,VEGFA
TEAD4		transcription regulator			0.0165	FGFR2,VEGFA
THPO		cytokine			0.0174	Bmyc,VEGFA
7,8-dihydro-7,8-dihydroxybenzo(a)pyrene 9,10-oxide		chemical toxicant			0.0177	VEGFA
AGTRAP		g-protein coupled receptor			0.0177	VEGFA
ALOX15B		enzyme			0.0177	VEGFA
BMS-387032		chemical drug			0.0177	VEGFA
BQ 123		biologic drug			0.0177	VEGFA
CCND2		other			0.0177	VEGFA
ESRP1		other			0.0177	FGFR2
GLRX		enzyme			0.0177	VEGFA
L-N6-(1-iminoethyl)-lysine		chemical reagent			0.0177	VEGFA
MB		transporter			0.0177	VEGFA
PINK1		kinase			0.0177	VEGFA
TPM3		other			0.0177	VEGFA
miR-126a-3p (and other miRNAs w/seed CGUACCG)		mature microrna			0.0177	VEGFA
F2R		g-protein coupled receptor			0.0178	FGFR2,VEGFA
TFAP2A		transcription regulator			0.0178	RAB27B,VEGFA
GW501516		chemical drug			0.0181	Acot1,VEGFA
dextran sulfate		chemical drug			0.0186	FGFR3,MYLK,VEGFA
mir-10		microrna			0.0194	FGFR3,VEGFA
BCL6B		transcription regulator			0.0196	VEGFA
CYBA		enzyme			0.0196	VEGFA
GPC1		transmembrane receptor			0.0196	VEGFA
HOXB7		transcription regulator			0.0196	VEGFA
INCB054329		chemical drug			0.0196	FGFR3
MALAT1		other			0.0196	VEGFA
RAMP1		g-protein coupled receptor			0.0196	VEGFA
SQ 22536		chemical reagent			0.0196	VEGFA
SU1498		chemical - kinase inhibitor			0.0196	VEGFA
TEF		transcription regulator			0.0196	MYLK
candesartan cilexetil		chemical drug			0.0196	VEGFA
largazole		chemical - endogenous non-mammalian			0.0196	VEGFA
plicamycin		chemical drug			0.0201	PPP1R1B,WWC1
diethylnitrosamine		chemical toxicant			0.0204	PAH,VEGFA
mir-1		microrna			0.0211	MYLK,VEGFA
2-aminoethoxydiphenylborane		chemical reagent			0.0216	VEGFA
ATP7A		transporter			0.0216	VEGFA
CDK6		kinase			0.0216	VEGFA
HIPK1		kinase			0.0216	VEGFA
MSI2		other			0.0216	SMAD3
PPBP		cytokine			0.0216	VEGFA
S100A7		other			0.0216	VEGFA
SART1		other			0.0216	VEGFA
TWIST		group			0.0216	ST3GAL5
echinomycin		chemical drug			0.0216	VEGFA
manumycin A		chemical reagent			0.0216	VEGFA
mimosine		chemical drug			0.0216	VEGFA
nandrolone		chemical drug			0.0216	VEGFA
orlistat		chemical drug			0.0216	VEGFA
U0126		chemical - kinase inhibitor			0.0217	FGFR2,KIFC3,SMAD3,VEGFA
RXRA		ligand-dependent nuclear receptor			0.0217	Acot1,GAS6,VEGFA
TGFB3		growth factor			0.0218	TNS1,VEGFA
losartan potassium		chemical drug			0.0218	SMAD3,VEGFA
TGFB2		growth factor			0.0225	SMAD3,VEGFA
diphtheria toxin		chemical - endogenous non-mammalian			0.0225	GAS6,PDGFC
ALOX12		enzyme			0.0235	VEGFA
DDB2		other			0.0235	VEGFA
ETV6		transcription regulator			0.0235	VEGFA
FURIN		peptidase			0.0235	VEGFA
HOXC4		transcription regulator			0.0235	FGFR3
NELFB		other			0.0235	VEGFA
dovitinib		chemical drug			0.0235	FGFR2
miR-126a-5p (and other miRNAs w/seed AUUAUUA)		mature microrna			0.0235	VEGFA
miR-150-5p (and other miRNAs w/seed CUCCCAA)		mature microrna			0.0235	VEGFA
mir-379		microrna			0.0235	VEGFA
nordihydroguaiaretic acid		chemical drug			0.0235	VEGFA
ulipristal acetate		chemical drug			0.0235	VEGFA
staurosporine		chemical - kinase inhibitor			0.0244	SMAD3,VEGFA
beta-estradiol		chemical - endogenous mammalian		0.661	0.0248	Acot1,C9orf24,FGFR2,FGFR3,MYLK,PDE3B,PPP1R1B,SMAD3,VEGFA
OSM		cytokine		0.456	0.0251	AADAC,DHRS3,LBP,VEGFA
B4GALNT1		enzyme			0.0255	VEGFA
EDNRB		g-protein coupled receptor			0.0255	VEGFA
GSX2		transcription regulator			0.0255	PPP1R1B
HIF3A		transcription regulator			0.0255	VEGFA
Mmp		group			0.0255	VEGFA
SERPINB5		other			0.0255	VEGFA
SOX5		transcription regulator			0.0255	FGFR3
TIA1		other			0.0255	VEGFA
astressin 2B		biologic drug			0.0255	VEGFA
GNAQ		enzyme			0.0255	GAS6,VEGFA
CREB1		transcription regulator		1.98	0.0264	FGFR2,PDE3B,SPOCK3,VEGFA
KLF11		transcription regulator			0.027	SMAD3,VEGFA
ADAM15		peptidase			0.0274	VEGFA
F10		peptidase			0.0274	VEGFA
ID4		transcription regulator			0.0274	VEGFA
RLN2		other			0.0274	VEGFA
SRSF3		other			0.0274	VEGFA
albuterol		chemical drug			0.0274	VEGFA
beta-1,3-glucan		chemical drug			0.0274	VEGFA
dimethyl fumarate		chemical drug			0.0274	VEGFA
ebselen		chemical drug			0.0274	VEGFA
nickel chloride		chemical toxicant			0.0274	VEGFA
onapristone		chemical drug			0.0274	VEGFA
prostaglandin		chemical drug			0.0274	VEGFA
pyruvic acid		chemical - endogenous mammalian			0.0274	VEGFA
CCND1		transcription regulator			0.0283	Bmyc,MYLK,PAH
Sb202190		chemical - kinase inhibitor			0.0286	FGFR2,VEGFA
dihydrotestosterone		chemical - endogenous mammalian		0.156	0.0293	GAS6,MYLK,SMAD3,VEGFA
48s		complex			0.0293	VEGFA
GNA13		enzyme			0.0293	VEGFA
MYH9		enzyme			0.0293	VEGFA
NUP62		transporter			0.0293	WWC1
Nos		group			0.0293	VEGFA
miR-19b-3p (and other miRNAs w/seed GUGCAAA)		mature microrna			0.0293	VEGFA
mir-140		microrna			0.0293	VEGFA
mir-199		microrna			0.0293	VEGFA
orotic acid		chemical - endogenous mammalian			0.0293	AADAC
perindopril		chemical drug			0.0293	VEGFA
zinc protoporphyrin IX		chemical - endogenous mammalian			0.0293	FGFR2
APC		enzyme			0.0298	TNFRSF19,VEGFA
KDM5B		transcription regulator			0.0298	FGFR2,PDE3B
ADORA2A		g-protein coupled receptor			0.0302	PPP1R1B,VEGFA
ITGB1		transmembrane receptor			0.031	FGFR3,VEGFA
C1q		complex			0.0312	GAS6
CBX4		transcription regulator			0.0312	VEGFA
DPH5		enzyme			0.0312	SMAD3
HIF1AN		enzyme			0.0312	VEGFA
MAML1		transcription regulator			0.0312	MYLK
NREP		other			0.0312	VEGFA
UBD		other			0.0312	Acot1
WIN 55,212-2		chemical - other			0.0312	VEGFA
farnesyl pyrophosphate		chemical - endogenous mammalian			0.0312	SMAD3
miR-100-5p (and other miRNAs w/seed ACCCGUA)		mature microrna			0.0312	FGFR3
perfluorooctanoic acid		chemical reagent			0.0312	Acot1
SOX11		transcription regulator			0.0314	FGFR3,SMAD3
SRF		transcription regulator			0.0315	FGF12,MYLK,RAB27B
trichostatin A		chemical drug		-1.506	0.0317	DHRS3,FGFR3,PAH,SMAD3,VEGFA
Angiotensin II receptor type 1		group			0.0332	VEGFA
FABP5		transporter			0.0332	VEGFA
HHEX		transcription regulator			0.0332	VEGFA
Integrin		complex			0.0332	VEGFA
Ren2		peptidase			0.0332	VEGFA
bevacizumab		biologic drug			0.0332	VEGFA
cerulenin		chemical drug			0.0332	VEGFA
p85 (pik3r)		group			0.0332	VEGFA
rofecoxib		chemical drug			0.0332	VEGFA
TERT		enzyme			0.0335	PDGFC,SMAD3
BARX2		transcription regulator			0.0351	FGF12
PAEP		other			0.0351	VEGFA
SLC6A3		transporter			0.0351	PPP1R1B
batimastat		chemical - protease inhibitor			0.0351	VEGFA
glycine		chemical - endogenous mammalian			0.0351	VEGFA
lisinopril		biologic drug			0.0351	VEGFA
miR-205-5p (and other miRNAs w/seed CCUUCAU)		mature microrna			0.0351	VEGFA
testosterone		chemical - endogenous mammalian			0.036	FGFR2,FGFR3,PDE3B
ACTB		other			0.037	MYLK
CCK		other			0.037	VEGFA
CRHR1		g-protein coupled receptor			0.037	VEGFA
ITGA6		transmembrane receptor			0.037	VEGFA
ITGB4		transmembrane receptor			0.037	VEGFA
KLRC4-KLRK1/KLRK1		transmembrane receptor			0.037	VEGFA
TEK		kinase			0.037	VEGFA
pirfenidone		chemical drug			0.037	SMAD3
vanadate		chemical - other			0.037	VEGFA
IL2		cytokine			0.037	FGFR2,PDE3B,PDGFC,VEGFA
ATXN1		transcription regulator			0.0389	VEGFA
NONO		transcription regulator			0.0389	PDE3B
RND3		enzyme			0.0389	VEGFA
TIMP2		other			0.0389	VEGFA
WWOX		enzyme			0.0389	VEGFA
ZNF202		transcription regulator			0.0389	VEGFA
dacinostat		chemical drug			0.0389	VEGFA
elovanoid N32		chemical - endogenous mammalian			0.0389	VEGFA
finasteride		chemical drug			0.0389	VEGFA
miR-296-5p (miRNAs w/seed GGGCCCC)		mature microrna			0.0389	VEGFA
peoniflorin		chemical drug			0.0389	PPP1R1B
puromycin		chemical - endogenous non-mammalian			0.0389	VEGFA
ADORA3		g-protein coupled receptor			0.0408	VEGFA
CDK5R1		kinase			0.0408	PPP1R1B
FOXF1		transcription regulator			0.0408	MYLK
GNAI3		enzyme			0.0408	VEGFA
LIPG		enzyme			0.0408	VEGFA
PD 153035		chemical drug			0.0408	VEGFA
SPZ1		transcription regulator			0.0408	VEGFA
YWHAZ		enzyme			0.0408	SMAD3
elovanoid N34		chemical - endogenous mammalian			0.0408	VEGFA
MAPT		other			0.0408	FGFR3,PPP1R1B,VEGFA
EGLN		group			0.041	VEGFA,VKORC1
TNFRSF1A		transmembrane receptor			0.041	LBP,VEGFA
isoproterenol		chemical drug			0.0414	DHRS3,VEGFA
CCN3		growth factor			0.0427	PDGFC
GRN		growth factor			0.0427	VEGFA
LILRB1		transmembrane receptor			0.0427	FGFR3
MAPK13		kinase			0.0427	VEGFA
NOX1		enzyme			0.0427	VEGFA
PDGFC	0.063	growth factor			0.0427	VEGFA
agmatine		chemical - endogenous mammalian			0.0427	SLC22A4
branched chain amino acids		chemical drug			0.0427	VEGFA
salinosporamide A		chemical drug			0.0427	VEGFA
nitrofurantoin		chemical drug			0.0428	LBP,VEGFA
androgen		chemical drug			0.0442	FGFR2,SMAD3
CRHR2		g-protein coupled receptor			0.0446	VEGFA
FGF4		growth factor			0.0446	VEGFA
HTATIP2		transcription regulator			0.0446	VEGFA
KIF3A		enzyme			0.0446	VEGFA
MGP		other			0.0446	PAH
NFE2		transcription regulator			0.0446	RAB27B
epicatechin gallate		chemical drug			0.0446	VEGFA
oxymatrine		chemical drug			0.0446	SMAD3
pregna-4,17-diene-3,16-dione		chemical - endogenous non-mammalian			0.0446	VEGFA
HRAS		enzyme			0.045	GAS6,PDGFC,SMAD3,VEGFA
RARB		ligand-dependent nuclear receptor			0.0461	DHRS3,VEGFA
TGFB1I1		transcription regulator			0.0465	TNS1
THZ2		chemical - kinase inhibitor			0.0465	SMAD3
chelerythrine		chemical drug			0.0465	VEGFA
diosgenin		chemical - endogenous non-mammalian			0.0465	VEGFA
miR-23a-3p (and other miRNAs w/seed UCACAUU)		mature microrna			0.0465	SMAD3
vanillin		chemical - endogenous non-mammalian			0.0465	FGFR2
vasoactive intestinal peptide		biologic drug			0.0465	VEGFA
CSF3		cytokine			0.048	LBP,VEGFA
COMMD1		transporter			0.0484	VEGFA
GABA		chemical - endogenous mammalian			0.0484	VEGFA
SOX6		transcription regulator			0.0484	FGFR3
Smad		complex			0.0484	VEGFA
lead		chemical toxicant			0.0484	VEGFA
gefitinib		chemical drug			0.0485	FGFR2,VEGFA
GATA2		transcription regulator			0.0488	DDIT4L,SLC22A4,VEGFA
BRCA1		transcription regulator			0.0495	SMAD3,VEGFA
POR		enzyme			0.05	Acot1,VEGFA

## Sheet: M4_C2vC1
© 2000-2020 QIAGEN. All rights reserved.
Upstream Regulator	Expr Log Ratio	Molecule Type	Predicted Activation State	Activation z-score	p-value of overlap	Target molecules in dataset	Mechanistic Network
TO-901317		chemical reagent		0.712	4.83e-07	APCS,Apoc1,APOE,CRP,FADS2,FMO1,GAMT,LIFR,Scd2	CEBPB,N-cor,NR1H2,NR1H3,NR3C1,PPARA,TNF,TO-901317,TP53
MFSD2A		transporter		-1.98	1.67e-06	ALDOC,FADS2,Scd2,STARD4
pirinixic acid		chemical toxicant		1.03	1.69e-06	ALDOC,APCS,APOE,CRP,DBI,FADS2,HILPDA,HSPE1,ID2,LIFR,PDCD4	NR1H2,PPARA,pirinixic acid
Gcg		other	Activated	2.236	3.57e-06	ALDH1B1,GAS2,MMD2,NCALD,OAT
[truncated: 438 more rows]
