# Supplementary material for: Single-cell transcriptome analysis defines heterogeneity of the murine pancreatic ductal tree
Source: eLife. 2021 May 19;10:e67776. doi: 10.7554/eLife.67776 (PMC8184217; doi:10.7554/eLife.67776)
Supplement: Figure 5—source data 3. [file elife-67776-fig5-data3.xlsx]

## Sheet: log10(avgerage expression)
	0	2	1	4
0610007P14Rik	0.124938	0.0895347	0.0946751	0.0921521
0610009B22Rik	0.136129	0.120879	0.11352	0.112276
0610009L18Rik	0.0548876	0.031309	0.0276765	0.0345548
0610009O20Rik	0.0326919	0.0285297	0.0329401	0.0416374
0610010F05Rik	0.0334013	0.0227962	0.0221932	0.0445844
0610010K14Rik	0.040932	0.0462381	0.0407825	0.0460336
0610011F06Rik	0.261734	0.252777	0.193873	0.214527
0610012G03Rik	0.18667	0.177555	0.156667	0.196518
0610025J13Rik	0.00186157	0.00173491	0.00125179	0
0610030E20Rik	0.041145	0.0471918	0.0514395	0.0684936
0610033M10Rik	0.000183281	0	0.000897276	0.00169862
0610037L13Rik	0.0655335	0.0666371	0.0623012	0.0903846
0610038B21Rik	0.00133369	0	0.000488507	0
0610039K10Rik	0.000790397	0	0.00122074	0.0014543
0610040B10Rik	0.0131867	0.0169279	0.0113517	0.0190647
0610040J01Rik	0.109386	0.103052	0.0878849	0.0963692
0610043K17Rik	0.00221076	0.00246676	0.0049701	0.00317163
1010001B22Rik	0.00702832	0.00461325	0.00512682	0.00267379
1010001N08Rik	0.0311182	0.0298999	0.0319035	0.0336389
1110001J03Rik	0.26691	0.25131	0.279012	0.227553
1110002J07Rik	0	0	0	0
1110002L01Rik	0.0112556	0.00953166	0.0109427	0.00481497
1110002O04Rik	0.00482666	0.000843156	0.00392697	0.00989081
1110004E09Rik	0.124002	0.108526	0.111992	0.133042
1110004F10Rik	0.25187	0.208423	0.232392	0.296059
1110006O24Rik	0.00151216	0.000582232	0.00141696	0.00276105
1110008F13Rik	0.148253	0.106264	0.0831425	0.145948
1110008L16Rik	0.0171609	0.0121838	0.0136863	0.0151712
1110008P14Rik	0.0796066	0.0719017	0.0498868	0.0849697
1110012L19Rik	0.0626848	0.0449288	0.0622019	0.0614358
1110017D15Rik	0.00423581	0.00115768	0.0117822	0.0136292
1110019D14Rik	0.0282675	0.0146182	0.0176026	0.0161411
1110020A21Rik	0.0105093	0.0134494	0.0057889	0.0110153
1110032A03Rik	0.0682044	0.0461245	0.05583	0.065253
1110032F04Rik	0	0	0.000861779	0
1110034G24Rik	0.0397167	0.0259044	0.0283527	0.0449378
1110035H17Rik	0.00399826	0.00569329	0.00140831	0.00592758
1110037F02Rik	0.0499287	0.0470664	0.0492391	0.0416945
1110038F14Rik	0.0820292	0.0823808	0.0817064	0.0873904
1110046J04Rik	0.0305378	0.0260966	0.0204296	0.0204575
1110051M20Rik	0.0300824	0.0214125	0.0157445	0.0343737
1110059E24Rik	0.0640264	0.0493152	0.0564086	0.0552089
1110059G10Rik	0.0841347	0.061833	0.0712805	0.064312
1110065P20Rik	0.0874723	0.077348	0.0634286	0.0770527
1190002N15Rik	0.0701368	0.0658388	0.100326	0.107244
1190005I06Rik	0.027151	0.0260946	0.0293018	0.0391231
1190007I07Rik	0.0711197	0.0610739	0.0568998	0.062503
1200007C13Rik	0.000494244	0	0.00258607	0.00268279
1300002E11Rik	0.0974885	0.078502	0.065252	0.0746089
1300017J02Rik	0.00121477	0	0.00163584	0
1500002C15Rik	0.00127711	0.00357537	0.00234028	0.00234631
1500002F19Rik	0.00255175	0.00181611	0.000858294	0
1500009L16Rik	0.00210898	0.00265606	0.000929719	0.00240351
1500011B03Rik	0.0126414	0.00720978	0.0104572	0.0138468
1500011K16Rik	0.164949	0.164496	0.136893	0.154207
1500015A07Rik	0.00967909	0.00980859	0.0121047	0.0118151
1500015O10Rik	0	0	0	0
1500026H17Rik	0.0225969	0.0278463	0.0198448	0.0204084
1600002H07Rik	0.00708195	0.000706295	0.00503453	0.0124824
1600002K03Rik	0.0233334	0.0275069	0.0428199	0.040379
1600010M07Rik	0.00166733	0.00340067	0	0.00198223
1600012H06Rik	0.0357273	0.0449297	0.0443921	0.0606144
1600012P17Rik	0	0	0	0
1600014C10Rik	0.0069759	0.00719819	0.0113554	0.00935366
1600020E01Rik	0.0291839	0.0331635	0.0318253	0.0363536
1700001C02Rik	0	0.000607003	0	0
1700001J03Rik	0	0	0.001199	0
1700001L05Rik	0	0	0	0
1700001L19Rik	0.00196349	0.00169034	0	0
1700001O22Rik	0.00150001	0.00236186	0.00185032	0
1700003E16Rik	0.00389669	0.00297643	0.00526306	0.00739649
1700003F12Rik	0.00281837	0.00588843	0.00243692	0
1700003M07Rik	0	0	0	0
1700007B14Rik	0.000430169	0	0	0
1700007G11Rik	0.000400054	0	0	0.00275518
1700007K13Rik	0.00652351	0.0118163	0.00534888	0.00732669
1700007L15Rik	0.00642318	0.00146995	0.00162087	0.00532925
1700008J07Rik	0.0128066	0.00900566	0.0142459	0.0262992
1700008O03Rik	0.000391487	0	0	0
1700009J07Rik	0	0	0	0
1700010I14Rik	0.00583596	0.00197677	0.00282884	0.000967003
1700011E24Rik	0	0	0	0
1700011H14Rik	0.408514	0.378884	0.431149	0.354479
1700011I03Rik	0	0	0	0
1700012C14Rik	0.000730415	0.00091748	0.000394346	0
1700012L04Rik	0	0	0	0
1700013D24Rik	0.000461874	0	0	0
1700013F07Rik	0.00338416	0.00159167	0.00494374	0.0152294
1700016C15Rik	0.00105755	0.000564112	0.00123817	0.0055403
1700016F12Rik	0	0	0	0
1700016H13Rik	0.000252868	0	0	0
1700016K19Rik	0.0158868	0.00829465	0.0117255	0.0264263
1700016L21Rik	0	0	0	0
1700017B05Rik	0.0355102	0.0367276	0.0221323	0.047882
1700017D01Rik	0	0	0	0
1700018A04Rik	0	0	0	0
1700018L02Rik	0.000573499	0	0.00163648	0.00127212
1700019D03Rik	0.000503143	0.00130602	0.00767143	0.00126999
1700019G17Rik	0.0199181	0.0257635	0.0145715	0.00857419
1700020D05Rik	0	0.000651338	0	0
1700020I14Rik	0.153577	0.130329	0.124717	0.169623
1700020L24Rik	0	0	0	0
1700020N01Rik	0	0	0	0
1700021A07Rik	0	0	0	0
1700021F05Rik	0.0507172	0.0435951	0.0584478	0.0548551
1700022I11Rik	0	0	0	0
1700022N22Rik	0.000295507	0.00104435	0.00235194	0
1700023F06Rik	0.0137957	0.00930552	0.000892878	0.00924621
1700024G13Rik	0	0	0	0
1700024P16Rik	0	0	0	0.00334211
1700025G04Rik	0.038137	0.021341	0.00802759	0.0204911
1700026D11Rik	0	0	0.000987905	0
1700026J14Rik	0.000282884	0.00322319	0	0
1700026L06Rik	0.00493824	0.0077725	0.00390611	0.00968622
1700027F09Rik	0	0	0	0
1700028I16Rik	0	0	0	0
1700028J19Rik	0	0	0.00308868	0
1700028K03Rik	0.000246753	0	0	0
1700028P14Rik	0	0	0	0
1700029F12Rik	0.00178306	0	0.00119885	0.00258034
1700029I15Rik	0.00123206	0.0024919	0.00125871	0
1700029J07Rik	0.0264272	0.020171	0.0194693	0.0276423
1700029M20Rik	0	0.000564112	0	0
1700030J22Rik	0.00700997	0.00757771	0.00741107	0.00405809
1700030K09Rik	0.0115504	0.00988624	0.0167214	0.00825536
1700030O20Rik	0	0	0	0
1700034H15Rik	0.000614648	0	0.00217951	0
1700034P13Rik	0.000995	0.00151834	0	0
1700037C18Rik	0.0363955	0.0286581	0.0304905	0.0345367
1700037H04Rik	0.034284	0.0347653	0.0403753	0.071266
1700039M10Rik	0	0	0.000790666	0
1700040D17Rik	0.000698512	0	0	0
1700040L02Rik	0.0323838	0.0266097	0.0285453	0.026927
1700041G16Rik	0.00273412	0.000606329	0	0.0062455
1700042O10Rik	0	0	0	0
1700047I17Rik2	0.0137584	0.0112307	0.0104004	0.0232257
1700047M11Rik	0.00119672	0	0	0
1700048O20Rik	0.0013345	0.0021092	0.000785903	0.00268279
1700049E15Rik	0.232257	0.160517	0.0263455	0.0234991
1700049G17Rik	0.0170333	0.0130987	0.0204035	0.0201559
1700052K11Rik	0.0178671	0.00921615	0.014804	0.0270526
1700055D18Rik	0.00154481	0.00197653	0.00050204	0
1700056E22Rik	0.00730761	0.00569426	0.00531884	0.00688421
1700056N10Rik	0.00226179	0.0018919	0.000790666	0.00233351
1700058P15Rik	0.00112492	0	0	0.00270191
1700061G19Rik	0.000380822	0.000876635	0	0
1700064H15Rik	0	0	0	0
1700064M15Rik	0	0	0	0
1700065D16Rik	0	0	0	0
1700066B19Rik	0.00376213	0.00168504	0.00666351	0.0086336
1700066M21Rik	0.000949306	0.00316501	0.00337181	0.00206232
1700067K01Rik	0	0	0	0
1700071M16Rik	0	0	0	0
1700084C06Rik	0.000248232	0	0	0
1700084E18Rik	0.0031004	0.00603822	0.000498755	0.00156705
1700086D15Rik	0.00134028	0	0	0
1700086O06Rik	0.00981624	0.00715385	0.005988	0.00363684
1700086P04Rik	0.00091064	0.00149777	0.000790082	0.00198198
1700088E04Rik	0.0544961	0.0579378	0.0692061	0.0576085
1700092M07Rik	0.000543718	0	0	0
1700093K21Rik	0	0	0	0.00139524
1700096K18Rik	0.0137952	0.012629	0.00754326	0.00599426
1700097N02Rik	0.00125411	0	0	0
1700099I09Rik	0	0	0	0
1700102P08Rik	0	0	0	0
1700105P06Rik	0.00272671	0.00308236	0.00261635	0.00824404
1700109H08Rik	0.00211048	0.00268685	0.00359849	0
1700112D23Rik	0.00131303	0.0013862	0	0.00158118
1700112E06Rik	0.00799078	0.00620073	0.00363961	0.00999481
1700112J16Rik	0.0010031	0.00207594	0.000493733	0.0020039
1700113A16Rik	0.0139553	0.0242378	0.0207237	0.011366
1700120K04Rik	0.000465177	0.000710657	0	0.00185864
1700123I01Rik	0	0	0	0
1700123O20Rik	0.0768426	0.0713851	0.0667086	0.0742126
1700124L16Rik	0	0	0.000984552	0
1700125G22Rik	0.000528085	0	0	0.000548885
1700126G02Rik	0	0	0	0
1810006J02Rik	0	0	0	0
1810007D17Rik	0.000433978	0	0	0
1810008I18Rik	0.000337527	0	0.00077757	0
1810009A15Rik	0.0207322	0.0122445	0.01413	0.0208667
1810009J06Rik	0	0	0	0
1810010H24Rik	0.00277077	0.00314216	0.00440667	0.00601397
1810011H11Rik	0.000661277	0.00108987	0	0
1810011O10Rik	0.0110776	0.0113532	0.0167312	0.0344689
1810012K08Rik	0	0	0	0
1810012K16Rik	0.00152207	0	0.000777683	0.00270191
1810013L24Rik	0.0263128	0.0290588	0.0271866	0.0460708
1810014B01Rik	0.0132608	0.0117365	0.015651	0.0095816
1810019N24Rik	0.000349869	0.00176132	0	0
1810022K09Rik	0.255785	0.24313	0.216311	0.232639
1810024B03Rik	0.0207563	0.0273111	0.016184	0.0277204
1810026J23Rik	0.0216616	0.0182662	0.022791	0.0203498
1810030O07Rik	0.048797	0.0484165	0.0501084	0.0703617
1810032O08Rik	0.0125064	0.00762874	0.0196973	0.0119412
1810034E14Rik	0.0042098	0.00269327	0.0046149	0.00467609
1810037I17Rik	0.251594	0.229425	0.240554	0.272508
1810041H14Rik	0.00451993	0.000913357	0.00543904	0.00208741
1810041L15Rik	0.000371996	0	0.00679609	0.01038
1810043G02Rik	0.0590876	0.0462536	0.0435762	0.0448809
1810043H04Rik	0.178908	0.162777	0.159302	0.155085
1810044D09Rik	0.0192324	0.0162512	0.0143616	0.0240069
1810046K07Rik	0	0.00195945	0	0
1810049J17Rik	0	0	0	0.00164281
1810055G02Rik	0.00761587	0.00407566	0.00668899	0.00741279
1810058I24Rik	0.23818	0.225384	0.1732	0.162836
1810062G17Rik	0.0164823	0.00924031	0.0203323	0.0216164
1810062O18Rik	0.00306768	0.00239203	0.000785903	0.00366917
1810064F22Rik	0.0855566	0.0672755	0.0531596	0.0403442
2010005H15Rik	0.000893021	0	0	0
2010007H06Rik	0.00785793	0.0105004	0.00687256	0.0111081
2010013B24Rik	0	0	0	0
2010015M23Rik	0.00127725	0.00107385	0.000697961	0
2010107E04Rik	0.554379	0.559557	0.530936	0.502054
2010107G12Rik	0.00108351	0	0	0
2010107G23Rik	0.0607946	0.0613295	0.0556748	0.0821809
2010109A12Rik	0.00528768	0.00755668	0.00312375	0.00730477
2010109I03Rik	0	0.000710657	0	0
2010110K18Rik	0	0	0	0
2010111I01Rik	0.117738	0.111974	0.132368	0.0879337
2010300C02Rik	0.0397686	0.0377225	0.0371547	0.0217273
2010308F09Rik	0.00170293	0.00232044	0.000595418	0
2010309G21Rik	0.000267831	0	0	0
2010310C07Rik	0.00116118	0.00155869	0.00123786	0
2010315B03Rik	0.043822	0.0325948	0.0369756	0.0284787
2010320M18Rik	0.0693167	0.0660922	0.0699491	0.0692971
2200002D01Rik	0.0200506	0.0223431	0.044038	0.224622
2200002J24Rik	0.0114199	0.00950969	0.00589138	0.00311859
2210008F06Rik	0	0.000957487	0	0
2210010C04Rik	0.183161	0.165847	0.162043	0.129509
2210011C24Rik	0.00411233	0.000733929	0.00271382	0.00519035
2210013O21Rik	0.0584891	0.0403827	0.0558448	0.0685533
2210016F16Rik	0.0967363	0.0945035	0.0958133	0.123639
2210016L21Rik	0.143412	0.128148	0.13117	0.120657
2210017I01Rik	0.00347922	0.00646764	0.00628769	0
2210019I11Rik	0.0108281	0.013779	0.00713327	0.00427565
2210404O09Rik	0.0155061	0.0173934	0.010678	0.0128893
2210406O10Rik	0.00305147	0.00411125	0.00349843	0.00460125
2210407C18Rik	0.00167768	0.00273786	0	0.0113038
2210408I21Rik	0.0104174	0.00889071	0.00915688	0.00930159
2210414B05Rik	0	0	0	0
2210417A02Rik	0.00290217	0.00145825	0.00147613	0.00245868
2300009A05Rik	0.0487079	0.0517191	0.0536366	0.048474
2310001H17Rik	0.099348	0.0902488	0.0537078	0.0355079
2310008N11Rik	0.00187469	0.00468145	0	0
2310009B15Rik	0.0989765	0.0775681	0.0733014	0.0819488
2310010G23Rik	0.00144354	0	0.00256661	0
2310011J03Rik	0.0655692	0.0726525	0.051466	0.0808007
2310015A10Rik	0.0208803	0.0206025	0.0216393	0.00761679
2310016G11Rik	0.000538902	0.000739058	0.000969758	0.00340002
2310022A10Rik	0.0117228	0.00966839	0.0151469	0.0161383
2310022B05Rik	0.0477856	0.0472268	0.0538117	0.0622359
2310030G06Rik	0.0797394	0.0555889	0.087332	0.0962301
2310031A07Rik	0	0	0.000887631	0
2310033P09Rik	0.0910946	0.0754543	0.0743822	0.105322
2310035C23Rik	0.0744986	0.060212	0.059667	0.0747806
2310036O22Rik	0.280844	0.27177	0.262591	0.277408
2310039H08Rik	0.104845	0.088846	0.0827835	0.0950595
2310039L15Rik	0	0	0	0
2310040G07Rik	0.00370171	0.00143665	0.004795	0.00591155
2310040G24Rik	0.0193659	0.0230063	0.0151951	0.0183518
2310043M15Rik	0.00101774	0	0	0
2310047D07Rik	0	0	0	0
2310057J18Rik	0.000457188	0.00223473	0.00798732	0.0147596
2310057M21Rik	0.0154266	0.0170317	0.0210961	0.0199066
2310061I04Rik	0.0374007	0.0275304	0.0247478	0.0308974
2310068J16Rik	0.00237088	0.0011034	0.00285291	0
2310074N15Rik	0.00153234	0.000924062	0.0025062	0
2410002F23Rik	0.029212	0.0274415	0.0332434	0.0312572
2410004B18Rik	0.0565944	0.0408719	0.0558838	0.0638825
2410004P03Rik	0	0	0.00114241	0.0142301
2410015M20Rik	0.371222	0.355035	0.338422	0.30736
2410016O06Rik	0.00939993	0.00734455	0.0122181	0.0105175
2410018L13Rik	0.0106273	0.00573966	0.00607699	0.00101821
2410022M11Rik	0.0298871	0.0291639	0.0301147	0.0288056
2410080I02Rik	0.00128995	0.00321739	0.00130955	0.000893584
2410089E03Rik	0.0514352	0.0450364	0.0566752	0.0428909
2410131K14Rik	0.0148777	0.00934408	0.00516691	0.0077298
2500002B13Rik	0.0012689	0.00175545	0.00126305	0.00128999
2510002D24Rik	0.103561	0.0930571	0.103113	0.122663
2510009E07Rik	0.0185533	0.0305051	0.0241491	0.0226977
2510017J16Rik	0.00362793	0.00520736	0.00543852	0.010951
2510039O18Rik	0.0432645	0.0314747	0.0296238	0.0434844
2510046G10Rik	0.0387045	0.0453571	0.0242011	0.0144155
2600006K01Rik	0.00439181	0.00536207	0.00256608	0.00637187
2610001J05Rik	0.177688	0.14747	0.175708	0.189745
2610002M06Rik	0.0723695	0.0570894	0.0543594	0.0684784
2610008E11Rik	0.0304097	0.024646	0.0254624	0.0210282
2610020C07Rik	0.00653441	0.00560379	0.0021294	0.00671621
2610020H08Rik	0.00286188	0.00226791	0.000874288	0.00102494
2610021A01Rik	0.0099536	0.0088527	0.0166014	0.0113507
2610028H24Rik	0	0	0.000458912	0
2610035D17Rik	0.0430701	0.0348041	0.0428753	0.0407703
2610037D02Rik	0.0531831	0.048106	0.0528782	0.059728
2610044O15Rik8	0.0241888	0.0176965	0.0280083	0.0292315
2610204G07Rik	0.000466227	0	0	0
2610301B20Rik	0.0256655	0.0227712	0.0214583	0.0216823
2610305D13Rik	0.041967	0.0357497	0.019368	0.0142472
2610318N02Rik	0.000940955	0	0.000790082	0
2610507B11Rik	0.104763	0.0898553	0.0715226	0.0953462
2610524H06Rik	0.035395	0.0345845	0.013744	0.0256376
2610528A11Rik	0	0	0	0.00122432
2610528J11Rik	0.0491436	0.0377446	0.0473473	0.0385648
2700012I20Rik	0.00177933	0	0	0.00419615
2700016F22Rik	0.00176478	0.00167945	0.00150163	0
2700029M09Rik	0.106983	0.065453	0.0896588	0.0864889
2700033N17Rik	0.0116207	0.0115317	0.0118804	0.0148709
2700038G22Rik	0.00117621	0.00263647	0.000986226	0.00198198
2700046A07Rik	0.00240767	0.00319881	0.00334901	0
2700046G09Rik	0.0183865	0.0154489	0.0051103	0.00426534
2700049A03Rik	0.0605198	0.0473763	0.0253785	0.0270385
2700060E02Rik	0.273533	0.246285	0.227248	0.254249
2700062C07Rik	0.0360558	0.0203383	0.0323019	0.0385256
2700081O15Rik	0.0145778	0.0122027	0.0136891	0.019442
2700094K13Rik	0.208664	0.15866	0.159998	0.154738
2700097O09Rik	0.0297261	0.0272354	0.0307603	0.0442794
2810001G20Rik	0.0311156	0.0334423	0.0240544	0.0287478
2810004N23Rik	0.10661	0.0999909	0.116112	0.12345
2810006K23Rik	0.0332883	0.0275028	0.0336677	0.0164295
2810021J22Rik	0.00661039	0.0122043	0.00760598	0.0122395
2810029C07Rik	0.00338689	0.00367659	0.00329988	0.0035094
2810030D12Rik	0.000526167	0	0.00102163	0
2810032G03Rik	0	0	0	0
2810402E24Rik	0.0289293	0.0299414	0.0280019	0.0140861
2810403A07Rik	0.0589967	0.048397	0.0600718	0.0511324
2810405F17Rik	0.0116681	0.0166376	0.0240269	0.0194765
2810408A11Rik	0.00633884	0.00471698	0.00417961	0.00760309
2810414N06Rik	0.00250345	0.00190248	0	0.00470799
2810417H13Rik	0.00493596	0.00653981	0.00360532	0.00273881
2810425M01Rik	0.000729776	0	0	0
2810428I15Rik	0.215995	0.193933	0.207502	0.180612
2810429I04Rik	0.00653682	0.00196265	0.00148479	0.0023247
2810433D01Rik	0	0	0	0
2810442N19Rik	0.000890356	0	0	0
2810454H06Rik	0.0172721	0.0095945	0.00858754	0.0116133
2810455O05Rik	0	0	0	0
2810459M11Rik	0.013314	0.0100362	0.0107563	0.0109472
2810474O19Rik	0.11312	0.105823	0.11328	0.14232
2900009J06Rik	0.00129618	0	0.00163022	0.00245202
2900026A02Rik	0.125088	0.114888	0.128828	0.161495
2900052N01Rik	0.000614304	0	0	0
2900055J20Rik	0	0	0	0
2900060B14Rik	0.0165216	0.0101	0.011387	0.0236106
2900076A07Rik	0.026028	0.0191759	0.0192206	0.0181591
2900089D17Rik	0.00108041	0.00366295	0.00285675	0.00246048
2900093K20Rik	0.0186973	0.0184834	0.0129272	0.0219292
3010003L21Rik	0.0102617	0.0111553	0.00433751	0.0101591
3010026O09Rik	0.0184243	0.0100751	0.00666759	0.0038401
3100002H09Rik	0.000784047	0	0	0
3110001I22Rik	0.00488331	0.00457883	0	0.000893584
3110002H16Rik	0.0165744	0.00973058	0.0080402	0.0143334
3110009E18Rik	0.0153006	0.0132117	0.00922639	0.0159734
3110021N24Rik	0.0131071	0.0124833	0.0207425	0.0121832
3110040N11Rik	0.0395721	0.0378851	0.034691	0.0471834
3110043O21Rik	0.0075989	0.00881265	0.00640152	0.00736682
3110045C21Rik	0.00437704	0	0.00189644	0.00206232
3110052M02Rik	0.00275185	0.00315205	0.00257102	0.00556095
3110056K07Rik	0.0154643	0.00403313	0.00858427	0.00753936
3110062M04Rik	0.0360019	0.0246104	0.0381927	0.0395635
3110070M22Rik	0.00214983	0.000787998	0.00063318	0.00473144
3110079O15Rik	0.133729	0.0984364	0.0201661	0.0113359
3110082I17Rik	0.0254587	0.0199811	0.0141189	0.0221406
3110083C13Rik	0.00200005	0.000957487	0.00208428	0
3222401L13Rik	0.0313504	0.0281575	0.0188343	0.0191145
3300002A11Rik	0	0	0.001377	0
3300002I08Rik	0.0173425	0.00724594	0.0183351	0.0181393
3300005D01Rik	0	0	0	0
3425401B19Rik	0	0.000564112	0	0
3632451O06Rik	0	0	0	0
3830403N18Rik	0.000965336	0	0.00198462	0
3830406C13Rik	0.0807321	0.0708118	0.0752533	0.0853909
3830408C21Rik	0.000614304	0	0	0.00111496
3930402G23Rik	0	0	0	0
4430402I18Rik	0.0321651	0.0306429	0.0210854	0.00335254
4631405K08Rik	0.00134467	0.000885262	0	0
4632404H12Rik	0.00725479	0.00833282	0.00970095	0.0168933
4632411P08Rik	0.000878504	0.000908961	0.000805322	0.00317717
4632415L05Rik	0.0356323	0.0251481	0.0354911	0.0233802
4632428C04Rik	0.0046108	0.00612968	0.00256384	0.00206561
4731419I09Rik	0.000319004	0.00243457	0.000913272	0
4732419C18Rik	0.00435096	0.00528182	0.0010778	0.00198198
4732440D04Rik	0.0149996	0.0190006	0.0325605	0.02623
4732465J04Rik	0.00176643	0.000943576	0.000742084	0
4732471J01Rik	0.000273453	0.00163093	0	0.00155654
4732490B19Rik	0.00817051	0.00699486	0.0065479	0.000967003
4732491K20Rik	0.0181184	0.0162065	0.0114	0.0252832
4831440E17Rik	0.00138574	0	0.00407512	0.00201949
4833403J16Rik	0.00582774	0.00302835	0	0.0037279
4833407H14Rik	0.000296877	0	0.00095875	0
4833413E03Rik	0	0	0	0
4833413G10Rik	0.00309452	0.00157708	0.00444934	0.00247115
4833418N02Rik	0.0096783	0.0107661	0.0168731	0.0100034
4833420G17Rik	0.0426189	0.0428308	0.0456474	0.0459652
4833422C13Rik	0	0	0	0
4833422M21Rik	0	0.000706295	0	0
4833427G06Rik	0	0	0	0
4833428L15Rik	0	0	0	0
4833439L19Rik	0.0868276	0.0788326	0.0539366	0.0661319
4833445I07Rik	0.000504744	0	0.00118807	0.000814165
4921504A21Rik	0	0	0.00108438	0
4921507G05Rik	0.000995994	0.000720221	0.0020152	0
4921507P07Rik	0.00628676	0.00565368	0.00500412	0.005017
4921511C10Rik	0	0	0	0
4921514A10Rik	0.000557193	0	0	0
4921524J17Rik	0.100464	0.0974054	0.0867397	0.0788895
4921536K21Rik	0	0	0	0.00268279
4930402H24Rik	0.0997881	0.0933104	0.0872639	0.101639
4930403P22Rik	0.000313253	0.000837857	0.000932356	0
4930404N11Rik	0.00125672	0	0.000947419	0.00213609
4930408O17Rik	0.00157692	0.00412448	0.00119193	0.000917197
4930412M03Rik	0.000669488	0	0.000839312	0
4930415F15Rik	0	0	0	0
4930415O20Rik	0.0148524	0.0171807	0.0271665	0.021286
4930426D05Rik	0.00040196	0	0.000347314	0
4930426I24Rik	0.00406405	0.00173683	0.00176667	0
4930426L09Rik	0.000246753	0	0	0
4930427A07Rik	0.00305501	0.00119889	0.00196903	0.00104988
4930428O21Rik	0	0	0	0
4930430E12Rik	0	0	0	0
4930430F08Rik	0.0188723	0.0126587	0.0203655	0.0181294
4930432B10Rik	0.000649981	0	0	0
4930432K21Rik	0.000614419	0	0.000775431	0.00111496
4930439D14Rik	0	0	0	0.00121201
4930440I19Rik	0.0049262	0.00215897	0.000687656	0
4930444A19Rik	0	0	0	0
4930444P10Rik	0	0.00101227	0	0
4930445N18Rik	0	0	0	0.00268279
4930447C04Rik	0	0	0.00103528	0
4930448D08Rik	0.000555995	0	0.00076112	0.00136697
4930448N21Rik	0.00285816	0	0.00108495	0
4930451G09Rik	0.00121945	0.000965582	0.000759181	0.00156705
4930452B06Rik	0.0160159	0.00997338	0.0104582	0.0098613
4930453N24Rik	0.0478146	0.0372457	0.0415206	0.0417152
4930455D15Rik	0	0	0	0
4930455G09Rik	0.000523817	0.00131084	0	0.0019158
4930455H04Rik	0	0.000743338	0	0
4930458D05Rik	0.00305302	0.000752475	0.00166261	0
4930480K23Rik	0.0052737	0.00717265	0.00600241	0.00581265
4930481A15Rik	0.0138283	0.0203563	0.0153011	0.0101021
4930486L24Rik	0.000685553	0.00157416	0	0
4930500F10Rik	0	0	0	0
4930500M09Rik	0	0.000909899	0	0
4930503L19Rik	0.0117453	0.0114967	0.00384905	0.00126182
4930505A04Rik	0.000951319	0.00141674	0.00284494	0.00223833
4930505N22Rik	0	0.00111706	0	0
4930507D05Rik	0	0	0	0
4930509E16Rik	0.000656382	0	0	0
4930509G22Rik	0.000443254	0.00298264	0	0
4930510E17Rik	0	0.000744262	0.000723914	0
4930512B01Rik	0.000482455	0	0.000913272	0
4930513D17Rik	0	0	0	0
4930515G01Rik	0.00190774	0.001982	0.000875878	0.00133264
4930518I15Rik	0.00522873	0.00711378	0.00398944	0.00869991
4930519P11Rik	0	0	0	0
4930522L14Rik	0.0306569	0.020057	0.0195578	0.0198886
4930523C07Rik	0.175693	0.15459	0.152784	0.179424
4930524J08Rik	0.00624032	0.00503586	0.0020133	0.00593106
4930524O07Rik	0.0015931	0.00519628	0.0011428	0.00525995
4930525G20Rik	0.00207105	0	0.000831054	0.00403957
4930532G15Rik	0.00150684	0.000854104	0	0.00318554
4930533K18Rik	0	0	0	0
4930537H20Rik	0.00170925	0	0	0
4930539E08Rik	0	0.00131292	0	0.00181597
4930539J05Rik	0.00520634	0.00359833	0.00357412	0.00383437
4930540M05Rik	0.000780876	0	0	0
4930547M16Rik	0.000866355	0.000793596	0.000839312	0
4930548H24Rik	0.000520654	0	0	0
4930550C14Rik	0.00961474	0.00481975	0.0118867	0.00544075
4930553P18Rik	0.000459038	0.00154744	0	0
4930555A03Rik	0	0	0	0
4930556I23Rik	0.000511855	0	0	0
4930556M19Rik	0.000815847	0	0.00351119	0.00206561
4930556M19Rik.1	0.00631394	0.00556312	0.00752247	0.00614749
4930558J18Rik	0.000426635	0	0	0
4930558K02Rik	0.000292472	0	0	0
4930562F07Rik	0	0	0	0
4930565N06Rik	0	0	0.00070232	0
4930568A12Rik	0	0	0	0
4930570G19Rik	0.000274623	0.00077761	0	0.00182698
4930570N18Rik	0	0	0	0
4930573C15Rik	0.00170619	0	0	0
4930578C19Rik	0.000307154	0.00120487	0	0
4930578M01Rik	0	0	0	0.000917197
4930579C12Rik	0	0	0	0
4930579G24Rik	0.0025911	0.00495138	0.00387766	0.00288658
4930580E04Rik	0	0	0	0
4930589L23Rik	0	0	0.0012088	0
4930590J08Rik	0.000919018	0	0.000835096	0
4930595D18Rik	0	0	0	0
4930599N23Rik	0.00194962	0.00214595	0	0.00395637
4931406C07Rik	0.214755	0.161516	0.111801	0.0881065
4931406P16Rik	0.0998618	0.0989914	0.0645475	0.0604796
4931414P19Rik	0.0101089	0.00351142	0.0065664	0.00895539
4931422A03Rik	0.000522531	0	0	0
4931428F04Rik	0.00510578	0.00590996	0.00675373	0.00591204
4931431C16Rik	0.000507312	0	0	0
4931440F15Rik	0.001732	0	0.000681931	0.00109153
4932422M17Rik	0.0028126	0.0027255	0.00262686	0.00257657
4932438A13Rik	0.126772	0.103739	0.106922	0.109726
4932438H23Rik	0	0	0	0.00310919
4932443I19Rik	0	0	0	0
4933402N22Rik	0	0	0	0
4933404O12Rik	0.00411311	0.0023321	0.00276078	0.00256408
4933405D12Rik	0	0	0	0
4933406C10Rik	0.00168628	0.00252393	0.000798341	0
4933406I18Rik	0.000390711	0.00152164	0.00207736	0.00149498
4933406P04Rik	0.00205959	0.00187561	0.00284684	0.00230396
4933408B17Rik	0.00568026	0.00379652	0.00341568	0.00530526
4933408J17Rik	0	0.000827209	0	0
4933411E06Rik	0	0	0	0
4933413G19Rik	0	0	0	0
4933415A04Rik	0.00425463	0.00310618	0.00391239	0
4933417D19Rik	0	0	0	0
4933417E11Rik	0	0	0	0
4933423P22Rik	0	0	0.00076112	0
4933424G06Rik	0.000478175	0	0	0
4933424M12Rik	0	0	0	0
4933427D14Rik	0.0248662	0.0178333	0.0272966	0.0302579
4933427E11Rik	0.00114598	0	0.000620459	0.00270928
4933427G17Rik	0	0	0	0
4933429H19Rik	0.000692091	0	0	0.00193024
4933431E20Rik	0.0511809	0.063161	0.060759	0.052983
4933433G15Rik	0.000938813	0.000890764	0	0.00462705
4933434E20Rik	0.0795324	0.0703437	0.0624365	0.0847228
5031414D18Rik	0.00118936	0	0	0
5031425E22Rik	0.0587602	0.0656575	0.0652917	0.0763296
5031425F14Rik	0.00161861	0.000990019	0	0
5031439G07Rik	0.024652	0.0209579	0.0180878	0.0372927
5033403F01Rik	0.00180833	0	0	0
5033417F24Rik	0.0019234	0.0013711	0	0.000642987
5033426O07Rik	0.000658053	0	0	0
5033428I22Rik	0	0	0	0
5033430I15Rik	0.00443979	0.00140901	0.00251493	0.0022706
5330417C22Rik	0.201567	0.174203	0.119004	0.095203
5330426L24Rik	0	0	0	0
5330439K02Rik	0.00193068	0.00161436	0	0
5430402O13Rik	0.00346039	0.00251177	0.00350799	0.00116203
5430403G16Rik	0.0255468	0.0145639	0.0224487	0.0225399
5430416N02Rik	0.0140954	0.00939461	0.0168874	0.0159536
5430416O09Rik	0.000465917	0	0.00111863	0
5430421N21Rik	0	0	0	0
5430427N15Rik	0.000694147	0	0.00105878	0
5430427O19Rik	0.00238308	0	0	0.00126999
5730409E04Rik	0.0254478	0.0231442	0.0215524	0.0237322
5730420D15Rik	0	0	0	0
5730422E09Rik	0.001301	0.00094544	0	0
5730455P16Rik	0.041057	0.0371355	0.0388186	0.0523121
5730507C01Rik	0.00689277	0.00298446	0.00441698	0.00852404
5730508B09Rik	0.0106463	0.0124129	0.0105284	0.0216043
5730522E02Rik	0.00251167	0.000755219	0	0
5730559C18Rik	0.000923887	0.000936032	0.00255106	0.0124258
5730596B20Rik	0	0	0	0
5830405F06Rik	0.000454646	0	0	0
5830416I19Rik	0	0.000804439	0	0
5830432E09Rik	0.000240575	0	0	0
5830454E08Rik	0.00998848	0.00805676	0.00686632	0.0104465
5830468F06Rik	0.000528969	0	0	0
5930412G12Rik	0	0	0	0
5930422O12Rik	0	0.00127145	0	0
5930430L01Rik	0.0674728	0.0617346	0.0705686	0.0403077
6030407O03Rik	0.000745495	0.00108074	0	0
6030408B16Rik	0.00052501	0	0	0.000891394
6030419C18Rik	0.00114583	0	0.00144733	0.00182061
6030443J06Rik	0.00125507	0.00349857	0.00311937	0
6030445D17Rik	0.0011801	0	0	0
6030458C11Rik	0.0138436	0.00846145	0.00628179	0.0184265
6030468B19Rik	0	0	0	0
6230400D17Rik	0.00579685	0.00555406	0.00486389	0.00355128
6330403A02Rik	0	0	0	0
6330403K07Rik	0	0	0	0.00162385
6330403L08Rik	0.00920296	0.00632195	0.00217753	0
6330403N20Rik	0	0.00171101	0.000960507	0
6330408A02Rik	0.0443921	0.0346352	0.0229931	0.0274101
6330416G13Rik	0.00267518	0.00343792	0.00255468	0
6330418K02Rik	0.0231177	0.0205541	0.0210881	0.01384
6330562C20Rik	0.00499591	0.00473284	0.00203838	0.006872
6430503K07Rik	0.0369429	0.0372561	0.0300676	0.0101961
6430531B16Rik	0.00198119	0.00230984	0.0030417	0.00819045
6430548M08Rik	0.00193289	0.00313925	0.00248927	0.00377101
6430550D23Rik	0.000341857	0.00275174	0.000924817	0.00126999
6430562O15Rik	0	0	0.000946636	0
6430571L13Rik	0.000244841	0.00117154	0.000890172	0
6430573F11Rik	0.0320827	0.0251211	0.0241846	0.0152556
6430573P05Rik	0.00271916	0.00537227	0.00273471	0.00545051
6530409C15Rik	0	0	0	0
6720427I07Rik	0.00728926	0.0111092	0.00809753	0.0112262
6720489N17Rik	0.00359038	0.00509525	0.0040431	0.00503593
6820408C15Rik	0.000187294	0	0.000699408	0
8030462N17Rik	0.00546402	0.00172964	0.00159247	0.00525888
8430408G22Rik	0.0602748	0.0503386	0.0720551	0.0615109
8430432A02Rik	0.00127501	0.00194602	0	0.00145644
9030407P20Rik	0.00383904	0.000700716	0	0.00109153
9030612E09Rik	0.00377092	0.00177754	0.000971198	0.00124717
9030616G12Rik	0	0	0	0
9030617O03Rik	0.00821523	0.010059	0.00348788	0.00228663
9030622O22Rik	0.00961443	0.0141938	0.0093253	0.010144
9030624G23Rik	0.00375239	0.0022929	0.00168908	0.00145644
9030624J02Rik	0.052674	0.0489402	0.0420657	0.0507666
9130008F23Rik	0.151841	0.120058	0.104194	0.105164
9130011E15Rik	0.00345637	0.00339962	0.000438177	0
9130019O22Rik	0.00979078	0.00432848	0.00655734	0.0084077
9130023H24Rik	0.00413893	0.00172252	0.00680468	0.00574772
9130204K15Rik	0	0.000748813	0	0.000548885
9130213A22Rik	0.000628143	0	0	0
9130221H12Rik	0.00579476	0.00823594	0.0133376	0.0159991
9130230L23Rik	0.00326381	0.00369547	0	0.0070521
9130401M01Rik	0.0559879	0.0476718	0.0461723	0.0572202
9130604C24Rik	0.00290302	0.00158066	0.00144147	0.00463071
9230104M06Rik	0	0	0.000822837	0
9230105E05Rik	0.000400054	0	0	0
9230110C19Rik	0.00425777	0.00690931	0.00849296	0.00386862
9230111E07Rik	0.00087653	0.000990019	0	0.000642987
9330020H09Rik	0.0143905	0.0117152	0.0125394	0.0138007
9330104G04Rik	0.00168371	0.00325177	0	0.00198198
9330121J05Rik	0.00578283	0.00377525	0	0.00333343
9330136K24Rik	0.00256916	0.0049582	0.00357916	0.0011775
9330151L19Rik	0.00833685	0.0084494	0.00705515	0.00909259
9330158H04Rik	0	0	0.0008052	0
9330159F19Rik	0	0	0	0
9330160F10Rik	0.00423366	0.00924531	0.00421037	0.00328128
9330161L09Rik	0	0	0.00106864	0
9330175E14Rik	0.000161397	0	0	0
9330175M20Rik	0	0.000791487	0	0
9330179D12Rik	0	0	0	0.00229663
9330182L06Rik	0	0.00124068	0.0013653	0
9330185C12Rik	0.00859038	0	0	0.000814165
9430002A10Rik	0.000764533	0.000900914	0	0
9430015G10Rik	0.0034215	0.00543444	0.0046373	0.00120531
9430016H08Rik	0.0474471	0.0394157	0.0335234	0.045838
9430018G01Rik	0.00033823	0	0	0
9430020K01Rik	0.00338492	0.00248379	0.00424011	0.00413242
9430037G07Rik	0.000817084	0.00419181	0.00180647	0.0034448
9430038I01Rik	0.0183275	0.0125553	0.0131222	0.0239722
9430041J12Rik	0.00150684	0.00138905	0	0
9430060I03Rik	0.00445344	0.00349578	0.00264563	0.0105371
9430065F17Rik	0.00402949	0.00401654	0.00323221	0
9430069I07Rik	0	0	0	0
9430098F02Rik	0.000378994	0.00107244	0	0
9530026P05Rik	0.0247314	0.0217994	0.0184779	0.0309971
9530027J09Rik	0	0.000866061	0	0
9530034E10Rik	0.00465846	0.00173482	0.00240849	0.00106851
9530036M11Rik	0	0	0	0
9530046B11Rik	0	0	0.000444611	0
9530052C20Rik	0.000210599	0	0	0.00126182
9530052E02Rik	0.000319004	0	0	0
9530053A07Rik	0.0312765	0.0311341	0.0359256	0.0522965
9530059O14Rik	0	0.000720509	0	0
9530068E07Rik	0.16805	0.153363	0.137137	0.130797
9530077C05Rik	0.0683115	0.0537618	0.0297335	0.0401141
9530082P21Rik	0.016723	0.0125848	0.00752349	0.00164741
9830147E19Rik	0.012169	0.0140191	0.00665056	0.0127837
9930004E17Rik	0.000505988	0	0	0
9930012K11Rik	0.00218492	0.00266231	0.00372247	0
9930021J03Rik	0.0863723	0.0773414	0.0783884	0.102706
9930022D16Rik	0.000306367	0	0	0
9930111J21Rik1	0.000385534	0	0	0
9930111J21Rik2	0.00410112	0.00565237	0.00585242	0.00804456
a	0	0	0.000458912	0
A130010J15Rik	0.027329	0.0185463	0.0223044	0.0273983
A130014A01Rik	0.0124034	0.00388556	0.010736	0.0118281
A130051J06Rik	0.0030449	0.00352651	0.0032347	0.00302664
A130057D12Rik	0.00025748	0.00264347	0.0023875	0
A1cf	0	0	0.00075311	0.00126999
A230001M10Rik	0.0464446	0.0371878	0.0157868	0.0194789
A230005M16Rik	0.00530383	0.00273361	0.0077693	0
A230020J21Rik	0	0	0	0
A230028O05Rik	0	0	0	0
A230046K03Rik	0.0428361	0.0312691	0.0334666	0.0332203
A230050P20Rik	0.0304984	0.0201875	0.0179684	0.0275892
A230060F14Rik	0.00033823	0	0	0.00303639
A230065H16Rik	0	0	0	0.00186473
A230065N10Rik	0.000786174	0	0	0
A230072E10Rik	0.00563854	0.00470165	0.0061008	0.00903763
A230083N12Rik	0.000139333	0	0.00081206	0.00277627
A230087F16Rik	0	0.000889419	0	0.00223219
A230107N01Rik	0.00313619	0.00139683	0.00232802	0.000680408
A330009N23Rik	0.00173288	0.00101522	0.000897123	0.00189242
A330017A19Rik	0.0205119	0.0190942	0.0184915	0.0331206
A330032B11Rik	0	0	0	0
A330041J22Rik	0.00527691	0.00563204	0.00238916	0.00258094
A330069E16Rik	0.014375	0.00683149	0.0103788	0.0135193
A330074K22Rik	0.0018851	0.000470465	0.0010638	0.00176053
A330093E20Rik	0.000211153	0	0	0
A330094K24Rik	0.00140623	0	0.00153046	0.00144263
A3galt2	0	0	0	0.00126999
A430005L14Rik	0.0609101	0.052032	0.039003	0.0527983
A430027H14Rik	0	0	0	0
A430033K04Rik	0.0191721	0.0155553	0.0139034	0.0180405
A430046D13Rik	0.00742603	0.00337993	0.00203639	0.00557094
A430073D23Rik	0.00378555	0.00317552	0.00377889	0.00126685
A430078G23Rik	0.000496068	0.000786958	0	0
A430078I02Rik	0.000871666	0.00171555	0	0
A430105I19Rik	0.0206891	0.0113352	0.0322524	0.0493457
A430105J06Rik	0.00436742	0.00397201	0.000893633	0.00562114
A430106G13Rik	0	0.000791487	0	0
A430110L20Rik	0.00149557	0.00203649	0.00251838	0.00484621
A4galt	0	0.000748813	0	0
A530013C23Rik	0	0.000704915	0	0.00112013
A530016L24Rik	0.00111566	0	0	0
A530017D24Rik	0.00932908	0.0103129	0.00378604	0.00540309
A530020G20Rik	0.0138574	0.0124206	0.0210859	0.0117562
A530021J07Rik	0	0	0	0
A530032D15Rik	0.000392266	0	0.000905122	0
A530040E14Rik	0.000890526	0.00147211	0.00076112	0
A530064D06Rik	0	0	0.000775431	0
A530083I20Rik	0.00118517	0.00142394	0.000444611	0.00395571
A530084C06Rik	0.00149483	0	0.00102324	0.00198122
A530099J19Rik	0	0	0	0
A630001G21Rik	0.00124468	0	0	0.00284555
A630014C17Rik	0	0	0	0
A630023P12Rik	0	0	0.00103881	0
A630033H20Rik	0.000836333	0	0	0.00144263
A630072M18Rik	0.0113347	0.0141865	0.00596018	0.0236012
A630077J23Rik	0	0	0	0
A630095N17Rik	0	0	0	0
A730011C13Rik	0.00128246	0.000470465	0	0
A730015C16Rik	0	0	0.000890172	0
A730020M07Rik	0.00202449	0.00141066	0.00161872	0.00270191
A730035I17Rik	0	0	0	0
A730049H05Rik	0.00236054	0.000871171	0	0
A730056A06Rik	0.00420296	0.00830544	0.000841037	0
A730061H03Rik	0	0	0	0
A730071L15Rik	0	0.000786958	0.000836672	0
A730090N16Rik	0	0	0	0
A730098A19Rik	0.00948313	0.00713149	0.00241526	0.00259908
A830005F24Rik	0	0	0	0
A830008E24Rik	0	0	0.00203366	0
A830009L08Rik	0.00196844	0.00167946	0.00390249	0
A830010M20Rik	0.00788472	0.0088676	0.0104248	0.00320655
A830018L16Rik	0	0	0	0
A830019P07Rik	0	0	0.000737605	0.00129345
A830039N20Rik	0.00114204	0	0	0
A830052D11Rik	0.00126019	0	0	0
A830080D01Rik	0.0365967	0.0282465	0.0329491	0.0505851
A830082K12Rik	0	0	0	0
A930001A20Rik	0	0	0	0
A930002I21Rik	0	0	0	0
A930004D18Rik	0.00912517	0.00901209	0.00738817	0.00977769
A930006I01Rik	0	0	0	0
A930007I19Rik	0.000478175	0.00397616	0	0
A930011G23Rik	0	0	0	0
A930012L18Rik	0.0064624	0.00599793	0.00465599	0.00367951
A930015D03Rik	0.000878465	0.000987777	0.000718124	0.00874426
A930016O22Rik	0	0	0	0
A930018M24Rik	0	0	0	0
A930024E05Rik	0.00129474	0.00434484	0	0.00294405
A930024N18Rik	0.00142573	0	0	0.00176053
A930029G22Rik	0.0025339	0.00244899	0.00383854	0.00331693
A930033H14Rik	0.000964504	0.00249517	0.00178108	0.000548885
A930038B10Rik	0.00344754	0.00247178	0.00403344	0.00175795
AA386476	0.00553898	0.0064462	0.000988654	0.00477601
AA415398	0.00416515	0.00244049	0.00125301	0.00593113
AA467197	0.000240575	0	0.000853053	0.0312625
AA474331	0.00739158	0.00617708	0.00425728	0.00170771
AA474408	0.00284612	0.00417097	0.00554052	0.00131085
AA543186	0.00258487	0	0	0
AA986860	0.0183001	0.0230358	0.0353608	0.0509506
Aaas	0.00896778	0.011788	0.0136072	0.007703
Aacs	0.00542753	0.00682523	0.00926381	0.00946265
Aadac	0.0145306	0.0238589	0.0432769	0.0587567
Aaed1	0.0285715	0.0251744	0.0313204	0.0288429
Aagab	0.022401	0.0194451	0.0183456	0.0181535
Aak1	0.0729109	0.0491309	0.0652739	0.0992374
Aamdc	0.0930166	0.0801925	0.0898878	0.0940329
Aamp	0.245558	0.211903	0.200791	0.218854
Aar2	0.0243325	0.0187027	0.017745	0.0295034
Aars	0.0696592	0.0550233	0.0549028	0.116411
Aars2	0.00872677	0.00975115	0.0056497	0.0217538
Aarsd1	0.00376086	0.0033968	0.0027313	0.00442033
Aasdh	0.0103561	0.0195732	0.0178027	0.0171439
Aasdhppt	0.0583699	0.0505228	0.0535241	0.0572292
Aass	0.0307941	0.0271056	0.0419859	0.0225741
Aatf	0.0404928	0.0318772	0.0362638	0.052709
Aatk	0	0	0	0
AB124611	0.00784116	0.00999185	0.00675423	0.00190984
Abat	0.000252868	0	0.00127084	0
Abca1	0.0436347	0.0308118	0.0397328	0.0417557
Abca13	0	0	0	0
Abca14	0.001259	0	0	0
Abca17	0	0	0	0
Abca2	0.0300423	0.0305877	0.0301272	0.024979
Abca3	0.0573858	0.0454093	0.0342331	0.0510876
Abca4	0.000460602	0	0	0
Abca5	0.0149837	0.0148743	0.0187773	0.0228261
Abca6	0.000714924	0	0	0
Abca7	0.00676444	0.0047438	0.00357365	0.00182698
Abca8a	0.00402607	0.00312162	0.00416886	0.0019158
Abca8b	0.014742	0.0120934	0.00427183	0.00230009
Abca9	0.00477644	0.00857332	0.0024843	0.00481516
Abcb10	0.0115178	0.0112441	0.0088234	0.0232856
Abcb1a	0.0109525	0.0157081	0.00833966	0.020925
Abcb1b	0.0031328	0.00446403	0.00613742	0.00707147
Abcb4	0.00771768	0.00480054	0.000499209	0.000642987
Abcb6	0.00874735	0.00673936	0.00879978	0.00936521
Abcb7	0.0274702	0.0301094	0.0250601	0.0286584
Abcb8	0.027621	0.0162705	0.0134706	0.0287352
Abcb9	0.00477881	0.00469762	0.00346388	0.00264101
Abcc1	0.0412996	0.0377017	0.0290369	0.0245687
Abcc10	0.00546929	0.00591501	0.00409911	0.00760362
Abcc3	0.122629	0.105807	0.0933362	0.112227
Abcc4	0.0156586	0.0177463	0.0120205	0.0139368
Abcc5	0.067221	0.0585684	0.0536428	0.0777398
Abcc6	0.000454352	0	0	0
Abcc8	0.00671585	0.00709451	0.000745584	0.00335948
Abcc9	0.00082769	0	0	0
Abcd1	0.0150141	0.0192931	0.010048	0.0120318
Abcd2	0.00233158	0.00217413	0.00133856	0
Abcd3	0.187293	0.171649	0.186782	0.231685
Abcd4	0.0166996	0.0166738	0.0108627	0.0164595
Abce1	0.0635643	0.0614659	0.050384	0.0652956
Abcf1	0.165389	0.165256	0.146173	0.161739
Abcf2	0.0358425	0.0259996	0.0250995	0.0301711
Abcf3	0.0378578	0.0331017	0.037769	0.0343023
Abcg1	0.00334443	0.00176649	0	0.00807589
Abcg2	0.030306	0.0467586	0.0376137	0.0228134
Abcg3	0.000886667	0.00234251	0	0.00113545
Abcg4	0	0	0	0
Abcg5	0	0	0	0.00266727
Abhd10	0.0277653	0.0150794	0.0202081	0.0224723
Abhd11	0.105778	0.0913116	0.0948522	0.0944529
Abhd11os	0.000803119	0	0	0.00836934
Abhd12	0.0430659	0.0475879	0.050637	0.0526038
Abhd12b	0	0.000882024	0	0
Abhd13	0.0307193	0.0274113	0.0270963	0.037743
Abhd14a	0.0513293	0.0469333	0.0506734	0.0488088
Abhd14b	0.113682	0.105776	0.117507	0.123779
Abhd15	0	0	0	0
Abhd16a	0.0606167	0.064277	0.0597103	0.0796013
Abhd17a	0.0771087	0.0649367	0.0645079	0.0997313
Abhd17b	0.0494741	0.04289	0.0413662	0.0363457
Abhd17c	0.0627745	0.0536377	0.0732768	0.0838743
Abhd18	0.0179992	0.0331063	0.0239388	0.0271911
Abhd2	0.059816	0.0631678	0.0408282	0.0721153
Abhd3	0.00363884	0.00480598	0	0.002255
Abhd4	0.0332436	0.0288372	0.0346923	0.0333634
Abhd5	0.0213512	0.0185056	0.0218294	0.0204187
Abhd6	0.0182421	0.00932358	0.0157035	0.0155979
Abhd8	0.0318052	0.02768	0.0288276	0.0323907
Abi1	0.11098	0.0908357	0.0828037	0.0874942
Abi2	0.0254836	0.0266036	0.0220042	0.020718
Abi3	0.00274534	0.00662408	0.00609037	0.006002
Abi3bp	0.000933427	0	0	0
Abl1	0.0470528	0.0474548	0.0507211	0.041469
Abl2	0.0262193	0.0266919	0.0209264	0.0354541
Ablim1	0.158534	0.123594	0.133102	0.207084
Ablim2	0.0010201	0.003358	0.00502513	0.00284954
Ablim3	0.00325214	0.00396202	0.00420091	0.00864781
Abr	0.0580026	0.0660883	0.0470379	0.0561447
Abracl	0.0807633	0.0733007	0.0933001	0.125865
Abt1	0.0379625	0.0345083	0.0331832	0.0602771
Abtb1	0.0813779	0.0625629	0.0638348	0.0802758
Abtb2	0.031792	0.0256761	0.0162978	0.0255981
AC125149.2	0	0	0	0
AC125149.3	0.000214018	0	0.00100369	0
AC132444.1	0	0	0	0
AC132444.5	0	0	0	0
AC132444.6	0	0	0	0
AC133103.1	0	0	0	0
AC168977.1	0	0	0	0
AC168977.2	0	0	0	0
Acaa1a	0.196709	0.188285	0.167649	0.16649
Acaa1b	0.000833191	0.000846369	0.00451384	0.00488492
Acaa2	0.136909	0.120204	0.140187	0.139933
Acaca	0.0235207	0.0157285	0.00844739	0.0168286
Acacb	0.00297882	0.00388544	0.00334032	0
Acad10	0.00456472	0.00202048	0.00107175	0.00432183
Acad11	0.0127557	0.014191	0.0102895	0.0140872
Acad12	0.010702	0.0122679	0.015387	0.0222206
Acad8	0.0361847	0.0442739	0.0356244	0.0417456
Acad9	0.0484742	0.041164	0.0578495	0.0856065
Acadl	0.108797	0.0802333	0.122609	0.100504
Acadm	0.20082	0.193164	0.215976	0.198062
Acads	0.0756474	0.0779615	0.0746284	0.0604365
Acadsb	0.0868519	0.0703654	0.0591351	0.0747358
Acadvl	0.1281	0.142807	0.132569	0.089074
Acap1	0.00303623	0.00231352	0	0
Acap2	0.0550805	0.0555925	0.0498563	0.0612495
Acap3	0.00363569	0.00784582	0.00378001	0.00604267
Acat1	0.128034	0.102328	0.128975	0.137302
Acat2	0.0282192	0.022351	0.0178356	0.021555
Acat3	0	0	0.000757681	0
Acbd3	0.0850301	0.0674163	0.0884569	0.126773
Acbd4	0.0455627	0.034549	0.0295087	0.0372648
Acbd5	0.103915	0.0942474	0.0775746	0.0885597
Acbd6	0.161382	0.14441	0.131007	0.169994
Acbd7	0.00128401	0.000858513	0.00205032	0
Accs	0.00765544	0.00830699	0.0128129	0.00816152
Acd	0.0236169	0.016281	0.0106466	0.0279976
Ace	0.00367254	0.00264913	0	0
Ace2	0	0	0	0.000967003
Acer2	0.00759412	0.00701969	0.00655167	0.0117727
Acer3	0.0739325	0.0785127	0.122771	0.12002
Ache	0.00143236	0	0	0
Acin1	0.194814	0.186701	0.171798	0.240353
Ackr1	0	0	0	0
Ackr2	0	0	0	0
Ackr3	0.0144033	0.0102842	0.0273191	0.0316081
Ackr4	0	0.00168327	0	0
Acly	0.100413	0.0895554	0.0978819	0.0939554
Acnat1	0.0136497	0.0159039	0.0149914	0.018424
Aco1	0.104442	0.0786001	0.0728425	0.107351
Aco2	0.132479	0.117023	0.110101	0.10574
Acot1	0.0650003	0.0603881	0.0952338	0.0781299
Acot10	0	0.00219044	0.00219948	0.00381886
Acot11	0.00138402	0.00261554	0.00470764	0.00772456
Acot13	0.207461	0.216862	0.172952	0.124604
Acot2	0.0160167	0.0251724	0.0178379	0.0123
Acot4	0	0.000892113	0.000950408	0
Acot6	0.0015258	0.00447774	0.002356	0.00410589
Acot7	0.0168389	0.017773	0.0118279	0.0217432
Acot8	0.0435628	0.0397709	0.0371433	0.0453462
Acot9	0.0357931	0.0446727	0.050891	0.0709508
Acox1	0.0518537	0.0492432	0.04269	0.0724553
Acox2	0.000864538	0.00170612	0.00119656	0.00282415
Acox3	0.0180508	0.0181342	0.0145732	0.0196145
Acoxl	0	0	0	0
Acp1	0.181287	0.145081	0.155156	0.185937
Acp2	0.0370125	0.0403416	0.0299801	0.0301264
Acp5	0.00772427	0.00242361	0.00384038	0.010866
Acp6	0.0468488	0.0441028	0.0381227	0.0498341
Acpp	0	0.00083159	0	0
Acr	0	0	0	0
Acrbp	0.0116236	0.0142161	0.0112043	0.0173532
Acsbg1	0.000313253	0	0	0
Acsf2	0.0400828	0.0321274	0.0211583	0.0294931
Acsf3	0.0201216	0.0202373	0.0144483	0.033023
Acsl1	0.0543323	0.0552835	0.0464444	0.0308053
Acsl3	0.121386	0.101397	0.108242	0.0709467
Acsl4	0.0455465	0.0335696	0.0306944	0.0465191
Acsl5	0.0992845	0.0740999	0.088638	0.114114
Acsm3	0.00410985	0.00602978	0.00125174	0.00327154
Acsm5	0.00044454	0	0.000976821	0
Acss1	0.00870301	0.00888656	0.0154624	0.0103367
Acss2	0.0651488	0.0586346	0.0781915	0.0674048
Acss3	0.000706168	0.00158378	0	0.00223219
Acta1	0.00051656	0	0	0
Acta2	0.000592843	0.00113812	0.00321972	0
Actb	0.912967	0.934776	0.857354	1.0026
Actg1	1.00495	0.910563	0.961192	1.09499
Actg2	0	0	0	0
Actl6a	0.0627313	0.0529745	0.0618416	0.0740925
Actn1	0.139128	0.11676	0.0756822	0.116717
Actn2	0.000267831	0	0.00063318	0
Actn3	0.000462238	0	0	0.00177286
Actn4	0.35207	0.304554	0.345026	0.370437
Actr10	0.125368	0.0937436	0.0988167	0.0990269
Actr1a	0.039024	0.0347022	0.0412241	0.071025
Actr1b	0.0581085	0.054272	0.04486	0.0601874
Actr2	0.16227	0.132088	0.139768	0.151985
Actr3	0.219164	0.194713	0.217474	0.274721
Actr3b	0.000796452	0.00088689	0.000817161	0
Actr5	0.0169739	0.0191387	0.0151829	0.0129839
Actr6	0.0348781	0.0201956	0.0331308	0.0396732
Actr8	0.0415593	0.0376912	0.036756	0.0443632
Actrt3	0	0	0	0
Acvr1	0.0137246	0.0139995	0.0120545	0.0170216
Acvr1b	0.0235523	0.0195388	0.0314914	0.0318243
Acvr1c	0	0	0	0
Acvr2a	0.0267645	0.0189157	0.0240784	0.0317377
Acvr2b	0.00769346	0.00904301	0.00616336	0.0227679
Acvrl1	0.0113554	0.0110162	0.00877107	0.0115801
Acy1	0.00453831	0.00555778	0.00603907	0.00982113
Acy3	0.0296816	0.0190317	0.0223563	0.0245715
Acyp1	0.0776975	0.0716696	0.0717639	0.0851511
Acyp2	0.0249822	0.0349301	0.0232671	0.0243153
Ada	0.00117096	0.00348079	0.00187365	0.0085488
Adal	0.00977261	0.00445622	0.00640333	0.0106055
Adam10	0.0698009	0.0613784	0.0403811	0.0881914
Adam11	0.000532863	0.00133483	0.00148261	0
Adam12	0.000341857	0	0.000723914	0
Adam15	0.0402611	0.0431163	0.0359083	0.0339732
Adam17	0.028323	0.0301565	0.0267967	0.0315328
Adam19	0.00684422	0.00541844	0.00423967	0.00455765
Adam22	0.00229885	0.00260007	0.002507	0.0061453
Adam23	0	0	0	0
Adam28	0.000227938	0.000890764	0.000833135	0
Adam3	0	0	0	0
Adam30	0.000288893	0.000781116	0	0.00252187
Adam32	0.000548104	0	0	0
Adam33	0.159682	0.146417	0.330869	0.372331
Adam4	0.0026521	0.00265662	0.00148602	0.00170771
Adam5	0.000803864	0.000776822	0.000989591	0.00305699
Adam6b	0	0	0	0
Adam8	0.0013174	0.000833668	0.000903108	0.00512149
Adam9	0.0219077	0.0344111	0.0290465	0.0261354
Adamdec1	0.000473333	0	0	0
Adamts1	0.432466	0.343987	0.0664938	0.0682704
Adamts10	0.00558081	0.00409542	0.00519637	0.0175767
Adamts12	0.000825342	0	0.00124704	0
Adamts14	0.000399874	0	0	0
Adamts15	0.0309037	0.0296509	0.0215336	0.0213591
Adamts16	0.0973859	0.0714671	0.0552342	0.0260579
Adamts17	0.00101027	0.00143977	0.00224568	0.00422714
Adamts18	0	0.00109426	0	0
Adamts19	0	0	0	0
Adamts2	0.00320082	0.0024188	0.0100875	0.0159239
Adamts3	0	0	0	0
Adamts4	0.000385785	0	0	0
Adamts5	0.0736149	0.0612046	0.0183976	0.012472
Adamts6	0.0135222	0.0178111	0.00793787	0.00369937
Adamts7	0.00309059	0.0021822	0.0049758	0.00355197
Adamts8	0	0	0	0
Adamts9	0.174595	0.149059	0.0647838	0.0636895
Adamtsl1	0.0100534	0.0068139	0	0
Adamtsl2	0.000898104	0	0	0
Adamtsl3	0	0	0	0
Adamtsl4	0.0367223	0.0381393	0.021932	0.032763
Adamtsl5	0.00279131	0.000804439	0	0.00158118
Adap1	0.00507436	0.00738216	0.00346175	0.00957742
Adap2	0.00300657	0.0048289	0.00217574	0.00497622
Adap2os	0.000852663	0.00188232	0.00094922	0
Adar	0.0278842	0.0302572	0.0280354	0.0322914
Adarb1	0.00340309	0.00340457	0.00342577	0.00385886
Adat1	0.0142656	0.0126661	0.00889585	0.0125382
Adat2	0.0187751	0.015485	0.0129373	0.0210371
Adat3	0.00171129	0.00165658	0.00251795	0.00879752
Adck1	0.0109492	0.00543248	0.00730529	0.0177298
Adck2	0.0229221	0.01708	0.011081	0.0312579
Adck3	0.0348083	0.0325745	0.0498199	0.0343461
Adck4	0.0168404	0.0174387	0.0174023	0.021439
Adck5	0.0792279	0.0666228	0.0566099	0.0608107
Adcy1	0.00135127	0	0	0.00169738
Adcy10	0	0	0	0
Adcy2	0.00778686	0.0066894	0.0116681	0.00516765
Adcy3	0.00479127	0.00119889	0.00309328	0.00546338
Adcy4	0.00192718	0.00205069	0	0
Adcy5	0.0220167	0.0175081	0.0059495	0.00671421
Adcy6	0.0472634	0.042215	0.046737	0.0655056
Adcy7	0.00369134	0.00930568	0.00407189	0.00267772
Adcy8	0.00295538	0.000833668	0	0.00667976
Adcy9	0.0130321	0.0128253	0.0113367	0.00696011
Adcyap1r1	0.00102948	0.000827209	0	0.00133264
Add1	0.101377	0.116734	0.0940175	0.141572
Add3	0.148737	0.112602	0.105418	0.117964
Adgb	0.0117087	0.0111448	0.00514083	0.00865391
Adgra2	0	0.0010524	0.00259266	0
Adgra3	0.0563667	0.0547091	0.0484286	0.0634598
Adgrb2	0	0	0	0
Adgrb3	0	0	0	0
Adgrd1	0.000827153	0	0.00170908	0.00277627
Adgre1	0.025721	0.0304438	0.0166629	0.0331166
Adgre4	0.00124821	0.00141131	0	0.00249678
Adgre5	0.0529082	0.0597507	0.0622598	0.0957021
Adgrf1	0.00153191	0.000700716	0.00268158	0
Adgrf5	0.00481077	0.0107609	0.00561833	0.00917058
Adgrg1	0.0581396	0.0550134	0.0707916	0.104916
Adgrg2	0.0297452	0.0217172	0.00618056	0.0149614
Adgrg3	0.000457849	0.00162312	0	0
Adgrg5	0.00093964	0	0	0
Adgrg6	0.106861	0.0985795	0.0991899	0.130187
Adgrg7	0	0	0	0.00826619
Adgrl1	0.00556409	0.00564559	0.00215927	0.00508528
Adgrl2	0.0415975	0.0405987	0.0301823	0.0360537
Adgrl3	0.0341312	0.0149401	0.0108981	0.00412351
Adgrl4	0.0038241	0.00291094	0.00494953	0.00607083
Adgrv1	0.00196503	0	0	0.00296686
Adh1	0.0173982	0.0187807	0.0294506	0.00984379
Adh5	0.155281	0.134931	0.129742	0.134847
Adh7	0	0	0	0
Adhfe1	0.0125595	0.00916739	0.00815079	0.00830298
Adi1	0.0512714	0.0530676	0.0442053	0.043743
Adipoq	0	0	0	0
Adipor1	0.140598	0.122071	0.104192	0.144275
Adipor2	0.0635425	0.0461921	0.0502624	0.0653167
Adk	0.33443	0.263828	0.286671	0.257836
Adm	0.000194988	0	0	0.00473735
Adm2	0	0	0	0
Adnp	0.00169836	0.00135689	0.00602296	0.00605884
Adnp2	0.0185087	0.0201317	0.0217632	0.0132377
Ado	0.0247832	0.022913	0.0283431	0.0193382
Adora1	0.0350904	0.0353699	0.0186081	0.0123733
Adora2a	0.000347619	0	0.000875878	0.00112013
Adora2b	0	0.00064623	0.000822837	0
Adora3	0	0	0	0
Adpgk	0.0117369	0.0055503	0.00941316	0.01233
Adprh	0.0483975	0.0333232	0.0360025	0.0693106
Adprhl2	0.0546878	0.0402223	0.0423713	0.0471573
Adprm	0.0280874	0.0213993	0.0339443	0.02585
Adra1b	0.000920084	0	0.00182791	0
Adra2a	0.00460744	0.00595993	0	0.0022736
Adra2c	0.000276887	0	0	0
Adrb1	0.00199283	0.00165692	0.00155725	0.00139524
Adrb2	0.0563507	0.0436094	0.0149931	0.0147598
Adrbk1	0.0346437	0.028868	0.0340788	0.0372254
Adrbk2	0.0108971	0.00817585	0.0146876	0.0116514
Adrm1	0.0746604	0.0711026	0.0701262	0.0873424
Adsl	0.0550398	0.0360929	0.0449139	0.0700425
Adss	0.116902	0.0952273	0.118549	0.181438
Adssl1	0.0224507	0.0167621	0.0184544	0.0137846
Adtrp	0	0	0	0
Aebp1	0.00902751	0.00755863	0.00462197	0.0116658
Aebp2	0.0598901	0.0535002	0.0684422	0.0816556
Aen	0.0175014	0.0196297	0.0166734	0.0243491
Aes	0.463544	0.428603	0.415694	0.394925
AF067061	0	0	0	0
AF251705	0.00464594	0.00476335	0.00229001	0.0109308
AF529169	0	0	0	0
Afap1	0.0396217	0.0355361	0.0306272	0.0731813
Afap1l1	0.00106392	0.00104017	0.00151045	0.00106851
Afap1l2	0	0	0	0
Aff1	0.0417594	0.0284114	0.0486221	0.036822
Aff2	0.00196604	0.000710283	0	0
Aff3	0.00066446	0.000714413	0.000424286	0
Aff4	0.194395	0.173546	0.15863	0.213894
Afg3l1	0.0604983	0.0526438	0.0538711	0.0767668
Afg3l2	0.0458608	0.0317888	0.0412917	0.0449273
Afm	0.00423587	0.000447646	0.00356389	0.00353992
Afmid	0.0015276	0	0.00208581	0.00170771
Afp	0	0	0	0
Aftph	0.0860243	0.087868	0.0940352	0.0984496
Aga	0.0704274	0.0620541	0.0517913	0.0438195
Agap1	0.0455203	0.0380027	0.032434	0.053885
Agap2	0.00125503	0	0	0
Agap3	0.0213393	0.0196288	0.0190495	0.0206521
Agbl1	0	0	0	0
Agbl2	0.00829621	0.00772902	0.0104524	0.0092578
Agbl3	0.0386735	0.0224082	0.0333811	0.059374
Agbl5	0.0126914	0.011758	0.0111722	0.0224545
Ager	0.0010024	0.000921642	0	0
Agfg1	0.0569437	0.0501811	0.0342633	0.0628061
Agfg2	0.0273632	0.0211538	0.0284827	0.0344877
Aggf1	0.0906762	0.0773596	0.0922023	0.0966154
Agk	0.0295868	0.0399564	0.0321349	0.0288717
Agl	0.0276412	0.0316263	0.040356	0.0536055
Agmat	0.00152739	0	0.00179332	0.00101821
Agmo	0.047143	0.0439085	0.0471984	0.0407052
Ago1	0.0517883	0.0456049	0.0484881	0.0419598
Ago2	0.041551	0.0367351	0.0357623	0.0529443
Ago3	0.02871	0.0305768	0.0255494	0.036467
Ago4	0.012364	0.00805396	0.0150371	0.0137639
Agpat1	0.0233321	0.0295841	0.0190641	0.0179768
Agpat2	0.137066	0.109792	0.123479	0.134801
Agpat3	0.067844	0.0601357	0.0561937	0.0587369
Agpat4	0.00839079	0.00432733	0.010352	0.0201144
Agpat5	0.0381835	0.0308208	0.0399275	0.0485961
Agpat9	0.000559835	0	0.00608235	0.0117811
Agps	0.0597147	0.0466141	0.0456957	0.0625922
Agr2	0	0	0	0.00309506
Agr3	0.000259317	0	0	0
Agrn	0.112392	0.100673	0.129636	0.172517
Agrp	0.000725424	0	0.000935675	0
Agt	0.033028	0.0317347	0.0153969	0.00703741
Agtpbp1	0.00973772	0.0125145	0.0108617	0.01494
Agtr1a	0.0020919	0.00343419	0.0076304	0.00718643
Agtrap	0.0615981	0.0502615	0.0661081	0.0863157
Ahctf1	0.0490041	0.0531215	0.0363079	0.0599296
Ahcy	0.0053991	0.00275711	0.00734036	0.00943913
Ahcyl1	0.125186	0.0964778	0.086888	0.0722357
Ahcyl2	0.061912	0.0532021	0.0445542	0.0832296
Ahdc1	0.0933469	0.100215	0.0843077	0.100643
Ahi1	0.00805031	0.0125562	0.00514596	0.0156836
Ahnak	0.252709	0.198608	0.279855	0.442046
Ahnak2	0.00145238	0.00150232	0.00107153	0.00643138
Ahr	0.0242541	0.021503	0.0207813	0.0318711
Ahrr	0.000183281	0	0.00105662	0
Ahsa1	0.152787	0.126467	0.134095	0.151754
Ahsa2	0.0292276	0.0257277	0.0201596	0.0303391
Ahsg	0.00133455	0	0.00150454	0
AI182371	0	0	0	0
AI314180	0.0757178	0.0786997	0.0681678	0.0540749
AI317395	0.00522487	0.00293768	0.000499209	0.00478481
AI413582	0.0334217	0.03339	0.0470546	0.0596063
AI427809	0.000246753	0.000965582	0	0
AI429214	0.00603301	0.00345522	0.00288838	0
AI464131	0.0021109	0.0032272	0.00138063	0.0100724
AI467606	0.00473368	0.00874353	0.00251587	0.00697325
AI480526	0.0378793	0.0325911	0.0320936	0.0281525
AI504432	0.00223355	0.00116458	0.0016903	0.00104988
AI593442	0	0	0	0
AI597479	0.0333216	0.0223743	0.0199027	0.0283373
AI606181	0.0116417	0.0168791	0.0199684	0.0179679
AI607873	0.00923183	0.0111966	0.00905836	0.00324797
AI646519	0.00729126	0.00462432	0.00145573	0.00176053
AI661453	0.0662757	0.0653226	0.0570416	0.0777027
AI662270	0.00409911	0.00518139	0.00792785	0.00664831
AI837181	0.054332	0.0414424	0.0448693	0.0529662
AI838599	0.0394759	0.0597273	0.0866819	0.063538
AI839979	0.000953256	0	0	0
AI846148	0.00868376	0.00769159	0.00928589	0.0189838
AI847159	0	0	0	0
AI854703	0.000646803	0.00101227	0	0
AI987944	0.0307058	0.0357212	0.0263176	0.0226555
Aicda	0.000932823	0	0	0
Aida	0.0708794	0.051554	0.0781608	0.107617
Aif1	0.0284181	0.0312155	0.0239069	0.0331747
Aif1l	0.0404292	0.0272046	0.00793505	0.00889294
Aifm1	0.064508	0.0485945	0.0509351	0.0646815
Aifm2	0.0125065	0.0123564	0.0166896	0.0203471
Aifm3	0.00451683	0.00423899	0.00301103	0.0048595
Aig1	0.161206	0.151587	0.12654	0.138559
Aim1	0.100567	0.0601304	0.0550884	0.106594
Aim1l	0.00157849	0	0	0.00335582
Aim2	0.00152027	0.00694792	0.000849656	0.00647158
Aimp1	0.243141	0.2368	0.216585	0.21331
Aimp2	0.0461106	0.04404	0.0368879	0.0743558
Aip	0.0594136	0.0513176	0.0551915	0.0667868
Aipl1	0	0	0	0
Aire	0.000517635	0.00156272	0.000394346	0
Airn	0.0551494	0.0553025	0.0504301	0.0604878
Ajuba	0.0417801	0.0404608	0.0573958	0.0780473
AK010878	0.0326793	0.0390211	0.0308273	0.0374039
Ak1	0.0335802	0.032497	0.0240171	0.0115387
AK157302	0	0.00198473	0.00258084	0
Ak2	0.0795465	0.0617918	0.0586548	0.0651158
Ak3	0.126045	0.112055	0.088295	0.113755
Ak4	0.001233	0.000842889	0.000935841	0
Ak5	0.000534915	0	0	0
Ak6	0.0426834	0.0424803	0.0548715	0.0649519
Ak7	0	0	0	0
Ak8	0.00152366	0.00197678	0	0.00260431
Ak9	0.00199913	0.00308447	0.00223737	0.00697564
Akap1	0.0252391	0.0231639	0.0288569	0.0197051
Akap10	0.0204069	0.0167746	0.0168001	0.0216832
Akap11	0.05657	0.0473413	0.0541633	0.0614511
Akap12	0.00133151	0.00235174	0	0.00135102
Akap13	0.172321	0.13324	0.154346	0.252759
Akap14	0.000686014	0	0.000458912	0
Akap17b	0.00401514	0.00452332	0.00651277	0.00156705
Akap2	0.00154823	0.00205111	0.00244903	0
Akap3	0	0	0	0
Akap5	0	0.0013576	0	0.00177909
Akap6	0.000419194	0	0	0
Akap7	0.0508503	0.0482797	0.0462126	0.0353945
Akap8	0.0609992	0.051455	0.0482196	0.060615
Akap8l	0.052051	0.0373038	0.0454877	0.0469694
Akap9	0.24511	0.235417	0.230406	0.303409
Akip1	0.0555299	0.0612258	0.0530622	0.0558702
Akirin1	0.0398671	0.0372659	0.0353758	0.0543021
Akirin2	0.107922	0.103674	0.119309	0.126441
Akna	0.00188294	0.00448156	0.00268569	0.00871264
Aknaos	0	0	0	0
Akr1a1	0.434707	0.361572	0.372304	0.423928
Akr1b10	0.0126495	0.0126248	0.0168827	0.024138
Akr1b3	0.0410605	0.0280015	0.0343514	0.0599489
Akr1b7	0	0	0	0.00971918
Akr1b8	0.0103791	0.0105352	0.0141669	0.0131614
Akr1c12	0.000537524	0	0.00085319	0
Akr1c13	0.00457616	0.00540503	0.00324208	0.00374882
Akr1c14	0.000418351	0	0	0
Akr1c18	0	0	0	0
Akr1c19	0.0667831	0.0929442	0.0567483	0.054733
Akr1c20	0.0137387	0.0173573	0.0247068	0.0169795
Akr1d1	0.000789271	0.00158091	0.00220739	0
Akr1e1	0.136894	0.101178	0.129509	0.158443
Akr7a5	0.0906627	0.0997934	0.0760004	0.0896997
Akt1	0.0669103	0.0546179	0.058047	0.0724747
Akt1s1	0.0693279	0.0615829	0.0611064	0.0853036
Akt2	0.0293277	0.0377661	0.0434442	0.0427807
Akt3	0.00202146	0.00262877	0.00469628	0.00126574
Aktip	0.103516	0.0842354	0.113294	0.136471
Alad	0.0868607	0.0838366	0.0852296	0.112127
Alas1	0.0423104	0.0427881	0.0376019	0.0433978
Alas2	0	0	0	0
Alb	0.0522439	0.0548405	0.0796555	0.0443167
Alcam	0.696075	0.707414	0.609898	0.562219
Aldh16a1	0.0186179	0.00941838	0.0216914	0.0197705
Aldh18a1	0.0122437	0.0133767	0.0151091	0.0221996
Aldh1a1	0.0533214	0.0437252	0.130731	0.15069
Aldh1a2	0.000335403	0.00154392	0.000741675	0.00124717
Aldh1a3	0	0.00180436	0	0
Aldh1a7	0.00106582	0	0.00112626	0.00257299
Aldh1b1	0.0452254	0.0259894	0	0.0035699
Aldh1l1	0.0598797	0.0612571	0.0280282	0.0159949
Aldh1l2	0.000227092	0	0	0
Aldh2	0.253174	0.250409	0.24847	0.232623
Aldh3a2	0.0461555	0.0481278	0.0486063	0.0527189
Aldh3b1	0.0296198	0.0285514	0.019094	0.0224732
Aldh4a1	0.0230053	0.0190725	0.0234535	0.00787681
Aldh5a1	0.00900732	0.0115737	0.00866698	0.0109484
Aldh6a1	0.0459858	0.0613476	0.0542097	0.0356278
Aldh7a1	0.144188	0.125419	0.14669	0.114972
Aldh9a1	0.0253525	0.0272154	0.0316837	0.0500045
Aldoa	0.37932	0.375436	0.419402	0.432683
Aldoart1	0.000557193	0.000713564	0	0
Aldob	0.000487018	0.00162065	0	0.000548885
Aldoc	0.308382	0.256459	0.0675956	0.0369241
Alg1	0.0405695	0.0311538	0.0361373	0.0336805
Alg10b	0.00482372	0.00624886	0.00671455	0.00294112
Alg11	0.0298308	0.0269026	0.0223008	0.0247897
Alg12	0.00986827	0.00577934	0.00790832	0.014868
Alg13	0.0167179	0.0116224	0.0111775	0.00757449
Alg14	0.0380468	0.0316536	0.02677	0.0482772
Alg2	0.026273	0.0173668	0.017952	0.0198214
Alg3	0.0180664	0.0105601	0.0133452	0.0075127
Alg5	0.0965039	0.0839413	0.0757259	0.104188
Alg6	0.0237095	0.017564	0.0205073	0.0212707
Alg8	0.0124844	0.0092392	0.0091776	0.0151646
Alg9	0.0205925	0.0157978	0.017026	0.0224547
Alkbh1	0.0394293	0.0433572	0.0459704	0.041586
Alkbh2	0.0501109	0.0463637	0.0372032	0.047177
Alkbh3	0.0259114	0.0197457	0.0232014	0.0301979
Alkbh4	0.00713199	0.00689477	0.00681529	0.0149911
Alkbh5	0.0851931	0.103558	0.099201	0.114506
Alkbh6	0.0489406	0.0436353	0.0456759	0.051547
Alkbh7	0.0722653	0.0842972	0.0787295	0.0604931
Alkbh8	0.0272814	0.0172945	0.0213755	0.0163057
Alms1	0.0105274	0.0125235	0.00944477	0.0211251
Alox12	0.0584003	0.0416662	0.0248989	0.0315882
Alox12e	0.00159746	0.000823131	0	0
Alox15	0	0.000839439	0.000911692	0
Alox5	0.00296694	0.00561534	0.00112329	0.00182698
Alox5ap	0.0185796	0.0211894	0.0146524	0.019132
Alox8	0	0	0	0
Aloxe3	0.00362707	0	0.00472215	0.00513685
Alpk1	0.00150077	0.000982219	0.000770857	0.00300868
Alpk2	0.000421315	0.00163476	0.00050912	0.00282341
Alpk3	0	0	0	0.000548885
Alpl	0.0124071	0.00827414	0.00454637	0.00480142
Als2	0.00718088	0.00736373	0.00329372	0.00747879
Als2cl	0.018261	0.0130415	0.014175	0.0246572
Als2cr12	0	0	0.000464489	0
Alyref	0.0854955	0.0656672	0.0634397	0.102164
Alyref2	0.015415	0.0115692	0.0111117	0.0183652
Amacr	0.0161761	0.0144578	0.00718282	0.00705045
Ambp	0.634168	0.641887	0.738829	0.530967
Ambra1	0.0285812	0.0256679	0.0137417	0.0391478
Amd1	0.214675	0.191686	0.159265	0.206102
Amd2	0.00430091	0.00239827	0.00319724	0.00483237
Amdhd1	0.00172327	0.00146604	0.00343309	0
Amdhd2	0.0335752	0.0223725	0.0273874	0.0221496
Amer1	0.0391186	0.0321205	0.0507988	0.0614079
Amer2	0.00122249	0.000869461	0	0
Amfr	0.0978966	0.0860375	0.0753869	0.11399
Amh	0	0.000851101	0	0
Amhr2	0	0	0	0
Amica1	0	0.000748813	0	0
Amigo1	0.0108318	0.0079453	0.00886507	0.003178
Amigo2	0.00226594	0.00364767	0.000832744	0.00277882
Amigo3	0.000700195	0.00175783	0	0
Ammecr1	0.0174452	0.0148644	0.00755356	0.0123624
Ammecr1l	0.0660225	0.0550563	0.054612	0.0522707
Amn	0	0	0	0
Amn1	0.088657	0.100675	0.0966217	0.112177
Amot	0.024463	0.0269944	0.0191631	0.035461
Amotl1	0.117917	0.103798	0.118227	0.150706
Amotl2	0.146724	0.137598	0.157063	0.20877
Ampd1	0	0	0	0
Ampd2	0.0127867	0.0111966	0.00979671	0.00997802
Ampd3	0.0148005	0.0156926	0.0176497	0.0278695
Amph	0	0	0	0
Amt	0.0194489	0.0185024	0.0173191	0.0174239
Amy1	0.00792569	0.00871099	0.0252669	0.0240101
Amy2a2	0.00026801	0.0036415	0	0.00109153
Amy2a3	0.0012483	0	0.000757788	0.0011775
Amy2a4	0.000266146	0.0011351	0	0
Amy2a5	0.00212857	0.00107045	0.00453609	0.00598165
Amz1	0.000801058	0.00163656	0.000833135	0.00153178
Amz2	0.0651824	0.0571582	0.0601525	0.0485541
Anapc1	0.0505075	0.0369779	0.0513336	0.0540994
Anapc10	0.0449007	0.0343332	0.0429633	0.0509634
Anapc11	0.218363	0.213524	0.214475	0.188669
Anapc13	0.434252	0.444513	0.423644	0.362341
Anapc15	0.0201338	0.0213125	0.0207113	0.0180492
Anapc15-ps	0	0	0	0.00181597
Anapc16	0.114165	0.0934239	0.107015	0.121879
Anapc2	0.0922849	0.0694465	0.0730999	0.114048
Anapc4	0.0629631	0.0570061	0.0555361	0.0760714
Anapc5	0.163122	0.127858	0.167836	0.177569
Anapc7	0.0462575	0.0434946	0.0394459	0.0339097
Ang	0.0071385	0.00774029	0.0125454	0.0139017
Angel1	0.00587457	0.00498595	0.00265038	0.00410282
Angel2	0.0494043	0.0588917	0.0599605	0.075237
Angpt1	0.17411	0.157912	0.164694	0.146529
Angpt2	0.000357232	0	0	0
Angpt4	0	0	0	0
Angptl1	0.0851439	0.0965643	0.0647957	0.0286776
Angptl2	0.00250577	0.00232797	0.00568962	0
Angptl3	0.000337527	0.00220718	0.00186926	0
Angptl4	0.000914058	0	0	0
Angptl6	0.00754454	0.00360652	0.0167931	0.00741713
Angptl7	0	0	0	0
Angptl8	0.017568	0.0133817	0.0267775	0.0426968
Ank	0.0380821	0.0267883	0.0363325	0.040109
Ank1	0	0	0	0.00127212
Ank2	0.00507551	0.00630847	0.00595011	0.00430477
Ank3	0.185052	0.151853	0.155888	0.153917
Ankef1	0.0043447	0.00292928	0.000891372	0
Ankfy1	0.0513483	0.0440422	0.0392562	0.0576558
Ankhd1	0.0810745	0.0894572	0.0915176	0.0915815
Ankib1	0.0396117	0.0266541	0.024007	0.0427857
Ankle1	0.000886511	0	0	0
Ankle2	0.0483463	0.0449285	0.0488441	0.0619609
Ankmy2	0.0473641	0.0348513	0.0436063	0.032542
Ankra2	0.0753214	0.0589606	0.0681622	0.086216
Ankrd1	0.173616	0.145623	0.142843	0.296384
Ankrd10	0.0536502	0.040528	0.0540868	0.0449265
Ankrd11	0.16574	0.133408	0.12651	0.193658
Ankrd12	0.156882	0.14835	0.161632	0.188831
Ankrd13a	0.0184493	0.0125344	0.0215972	0.0264686
Ankrd13b	0.00638099	0.00606501	0.00877758	0.0122551
Ankrd13c	0.0836905	0.0633856	0.0665111	0.0646065
Ankrd13d	0.0057563	0.00718064	0.00289473	0.00817958
Ankrd16	0.0170376	0.0222758	0.024393	0.0352738
Ankrd17	0.130633	0.0971248	0.116248	0.088205
Ankrd2	0	0	0	0
Ankrd23	0	0	0.000832744	0
Ankrd24	0.0266119	0.0320762	0.0240052	0.0346365
Ankrd26	0.0271924	0.0209907	0.0313443	0.0328336
Ankrd27	0.0327744	0.0295461	0.021855	0.0277955
Ankrd28	0.0103655	0.0130093	0.00905917	0.00988846
Ankrd29	0.0506354	0.0445768	0.0412045	0.0440073
Ankrd33b	0.0010231	0.000883346	0.000920612	0.00221418
Ankrd34a	0	0	0	0
Ankrd34b	0	0	0	0
Ankrd35	0.000828943	0.000651494	0	0
Ankrd37	0.00710699	0.0059701	0.00783385	0.00967946
Ankrd39	0.0398901	0.0431738	0.0303716	0.0450528
Ankrd40	0.0718076	0.0590286	0.0643116	0.0730783
Ankrd42	0.0266913	0.0188681	0.0218893	0.0331161
Ankrd44	0.0769863	0.0818341	0.0751719	0.0751217
Ankrd45	0.00164709	0.00177848	0.000746102	0
Ankrd46	0.0427632	0.0455225	0.0408169	0.0627125
Ankrd49	0.0161069	0.00832591	0.0175411	0.0204419
Ankrd50	0.040201	0.0382676	0.0247167	0.0277758
Ankrd52	0.00844274	0.00743155	0.00530922	0.0142753
Ankrd54	0.0283301	0.0143897	0.0241275	0.0299258
Ankrd55	0	0	0.000965643	0
Ankrd6	0.000862145	0.00163294	0	0.00139377
Ankrd65	0.000227938	0	0	0
Ankrd66	0	0	0	0
Ankrd9	0.0149245	0.00423722	0.00564056	0.00681484
Anks1	0.0131559	0.0100307	0.0212587	0.0340622
Anks1b	0.000620208	0	0	0
Anks3	0.0337942	0.0212531	0.0248684	0.0584121
Anks4b	0.0229681	0.0271836	0.0233212	0.0157581
Anks6	0.00886508	0.00803311	0.00293137	0.00347393
Ankub1	0	0	0	0
Ankzf1	0.023199	0.0185288	0.0221962	0.03722
Anln	0.000347619	0.000713658	0.000892878	0.00199339
Ano1	0.0915903	0.0959095	0.0761785	0.0913234
Ano10	0.0178708	0.014968	0.00882724	0.0267584
Ano3	0	0	0	0
Ano4	0.00115161	0.00345598	0	0
Ano6	0.136196	0.119661	0.125093	0.1724
Ano7	0	0	0	0
Ano8	0.00589835	0.00480639	0.00705463	0.0108434
Ano9	0.00584912	0.00475159	0.00260106	0.00277906
Anp32a	0.402984	0.367809	0.367028	0.399541
Anp32b	0.333893	0.279408	0.283794	0.323
Anp32e	0.130022	0.126664	0.104653	0.118832
Anpep	0.0720376	0.0556964	0.0644144	0.0517173
Antxr1	0	0	0.000766668	0
Antxr2	0.0090797	0.00980184	0.00792394	0.0122555
Anxa1	0.00275821	0.00465679	0.00767899	0.0242712
Anxa11	0.0618728	0.0484387	0.0605971	0.0887917
Anxa11os	0	0	0	0
Anxa13	0.0182923	0.017416	0.0212821	0.0323093
Anxa2	0.37648	0.316435	0.361633	0.556896
Anxa3	0.0234401	0.0146557	0.126631	0.473684
Anxa4	0.448971	0.403521	0.433067	0.418142
Anxa5	1.18441	1.14698	1.32589	1.24808
Anxa6	0.216904	0.178246	0.200771	0.202364
Anxa7	0.128643	0.111944	0.125052	0.162732
Anxa9	0.0307853	0.0419996	0.0470408	0.0359278
Aoah	0.00259716	0.00151436	0.00350339	0
Aoc1	0	0	0	0.0120592
Aoc2	0.00526158	0.00671474	0.00551019	0.00463706
Aoc3	0.000288823	0	0.00110014	0.00237055
Aox1	0	0.00082491	0	0
Aox2	0.000505695	0.000700716	0	0.00250739
Aox3	0	0	0	0
Ap1ar	0.053503	0.0519294	0.0503816	0.0527247
Ap1b1	0.0717489	0.0570456	0.0484173	0.055327
Ap1g1	0.08314	0.0836566	0.0665812	0.0824752
Ap1g2	0.0131618	0.0155666	0.0185987	0.0201661
Ap1m1	0.0260619	0.02125	0.0302803	0.0339255
Ap1m2	0.0556405	0.0491141	0.0344402	0.0550243
Ap1s1	0.0727225	0.0726491	0.0661479	0.106698
Ap1s2	0.00511309	0.00384198	0.0107027	0.00532876
Ap1s3	0.0147606	0.0172919	0.0114259	0.0194589
Ap2a1	0.0200309	0.0107942	0.0151102	0.023732
Ap2a2	0.111178	0.105383	0.0947231	0.114393
Ap2b1	0.191969	0.1741	0.142815	0.206535
Ap2m1	0.198004	0.148921	0.175238	0.181908
Ap2s1	0.225275	0.177369	0.155516	0.164649
Ap3b1	0.061763	0.0696008	0.0498857	0.0637819
Ap3b2	0	0	0	0
Ap3d1	0.0620089	0.0467161	0.0358479	0.0658704
Ap3m1	0.0244405	0.0240559	0.0282974	0.0286638
Ap3m2	0.0108744	0.00931014	0.0100722	0.00659232
Ap3s1	0.096355	0.0718622	0.0676068	0.079068
Ap3s2	0.0449355	0.0338014	0.0416616	0.0489232
Ap4b1	0.0128026	0.00968727	0.0077697	0.0117351
Ap4e1	0.00635931	0.0139071	0.0079279	0.0187081
Ap4m1	0.0320732	0.0354407	0.0295262	0.0490633
Ap4s1	0.0564898	0.0621077	0.0526706	0.0633985
Ap5b1	0.00337364	0.00221104	0.00192363	0.0105909
Ap5m1	0.0140959	0.00865007	0.00810712	0.0255851
Ap5s1	0.0230462	0.0222266	0.0185236	0.0181182
Ap5z1	0.0108444	0.00747042	0.00973526	0.012566
Apaf1	0.0197129	0.0147567	0.0238408	0.0277408
Apba1	0.000746199	0.00153389	0.00184273	0.00127212
Apba2	0	0	0	0
Apba3	0.0248853	0.028686	0.0219125	0.035671
Apbb1	0.0175926	0.0180609	0.0222573	0.0183076
Apbb1ip	0.00609422	0.00927552	0.00465683	0.00883977
Apbb2	0.046412	0.0521833	0.053363	0.082585
Apc	0.123675	0.0968321	0.112966	0.128163
Apc2	0.0014754	0	0.00181668	0.000548885
Apcs	0.100186	0.0903559	0.072314	0.0389909
Apeh	0.0466282	0.0416064	0.0454341	0.0380273
Apex1	0.0579495	0.0472049	0.05152	0.0732103
Apex2	0.00867423	0.012215	0.00558481	0.00546612
Aph1a	0.0959778	0.0819838	0.082166	0.0752853
Aph1b	0.0182455	0.015607	0.0148601	0.0243421
Aph1c	0.0134702	0.0100757	0.0176305	0.00908561
Api5	0.0694411	0.063588	0.0447506	0.0702997
Apip	0.0894683	0.0622564	0.0775094	0.0637089
Apitd1	0.00735252	0.00374244	0.00157224	0.00735605
Aplf	0.0125239	0.00609762	0.00807129	0.0114945
Apln	0.000625666	0.000851101	0	0
Aplnr	0.0010764	0.00133336	0	0
Aplp1	0.0086556	0.00396411	0.00500932	0.0103198
Aplp2	0.643633	0.587548	0.522915	0.52759
Apmap	0.0591899	0.0396766	0.0325504	0.0469477
Apoa1	0.000442864	0	0.00115769	0
Apoa1bp	0.193708	0.151988	0.168491	0.175617
Apoa2	0.00181891	0	0	0.00117663
Apobec1	0.06044	0.0509719	0.0387656	0.0610719
Apobec2	0	0	0	0
Apobec3	0.165747	0.138189	0.165622	0.268977
Apobr	0.0180228	0.0145477	0.00785134	0.0167526
Apoc1	0.544763	0.55129	0.338752	0.23498
Apoc4	0.00143758	0	0	0
Apod	0.000815914	0	0	0
Apoe	1.80225	1.79831	1.53012	1.30029
Apof	0.00315352	0.00308606	0.000894238	0.00198198
Apoh	0	0	0	0
Apol10a	0.0012136	0.00311032	0.00645219	0.00185864
Apol10b	0.000558744	0	0	0
Apol6	0	0	0	0.000642987
Apol7b	0	0	0	0
Apol7c	0.00190978	0.00177485	0.0058251	0
Apol7e	0	0	0	0
Apol9a	0.00438541	0.00370991	0.00175308	0.00241567
Apol9b	0.0109897	0.00352256	0.0194758	0.0150488
Apold1	0	0	0	0
Apom	0.000289079	0.00059445	0	0
Apon	0	0	0	0
Apoo	0.0278672	0.0255057	0.0306465	0.0192253
Apoo-ps	0.00127247	0.00332579	0.00499469	0.00177909
Apool	0.0459729	0.0435458	0.0510489	0.064275
Apopt1	0.0665742	0.0451815	0.0510112	0.0652861
App	0.589507	0.574002	0.531185	0.526347
Appbp2	0.108318	0.0914166	0.0776032	0.0705093
Appbp2os	0.00384384	0.00158506	0	0.00106851
Appl1	0.0893851	0.0637379	0.0821036	0.0783809
Appl2	0.0806853	0.0723087	0.0536937	0.0667294
Aprt	0.168386	0.156892	0.149722	0.176841
Aptx	0.0271131	0.0156018	0.0222292	0.0221238
Aqp1	0.00983383	0.0154039	0.0209968	0.0505015
Aqp11	0.00382286	0.00739833	0.010102	0.00693021
Aqp12	0.000600572	0.000790204	0.00192372	0
Aqp3	0	0	0	0
Aqp4	0.000287413	0.000921642	0	0
Aqp5	0.0460381	0.0308526	0.0167411	0.0172534
Aqp7	0	0	0	0
Aqp9	0	0	0	0
Aqr	0.0898896	0.0953254	0.0804067	0.0794758
Ar	0.000771444	0.0018608	0.00101942	0
Araf	0.0672362	0.0617353	0.0814634	0.0841591
Arap1	0.0232846	0.0270094	0.0172798	0.0271399
Arap2	0.116051	0.110363	0.0937262	0.112651
Arap3	0.000735687	0.00206053	0.00285764	0.00358832
Arc	0	0.00174509	0	0
Arcn1	0.122866	0.0979047	0.0978183	0.109682
Areg	0	0	0	0
Arel1	0.0171137	0.0160816	0.0125596	0.0127511
Arf1	0.347166	0.291465	0.324002	0.331316
Arf2	0.0232333	0.0152326	0.0240734	0.0357601
Arf3	0.0983863	0.0920375	0.0962709	0.101749
Arf4	0.227873	0.168751	0.202971	0.283016
Arf4os	0.000902672	0	0.00135831	0
Arf5	0.426193	0.407982	0.370274	0.406111
Arf6	0.148161	0.139783	0.14138	0.158817
Arfgap1	0.0358502	0.0414471	0.0340881	0.048068
Arfgap2	0.0657058	0.0544404	0.0459427	0.0763785
Arfgap3	0.0248219	0.019652	0.0142464	0.0364999
Arfgef1	0.132724	0.121078	0.134151	0.144605
Arfgef2	0.0238356	0.0217482	0.0180653	0.028232
Arfgef3	0.00473253	0.00078742	0.00616044	0.00220396
Arfip1	0.0504792	0.0430844	0.038019	0.0459081
Arfip2	0.0408896	0.0380574	0.0335341	0.0606351
Arfrp1	0.0713553	0.0577708	0.0700372	0.0806981
Arg1	0.00190434	0.00161551	0.00108415	0.00106851
Arg2	0.00144801	0.000784427	0.00437461	0.00453408
Arglu1	0.21087	0.212673	0.180491	0.239152
Arhgap1	0.0331151	0.0307627	0.0378764	0.0508809
Arhgap10	0.00478025	0.00890716	0.0069518	0.0126286
Arhgap11a	0.0023978	0.00443052	0.00369151	0.00158118
Arhgap12	0.0578646	0.0542868	0.0500385	0.0734953
Arhgap15	0.00308774	0.00334098	0.00130827	0.00851049
Arhgap17	0.0439663	0.0342158	0.0338284	0.0450969
Arhgap18	0.051591	0.0475682	0.0522897	0.0546066
Arhgap19	0.00404842	0.00188773	0.00380197	0.00623663
Arhgap20	0	0	0	0.00174294
Arhgap21	0.058192	0.0432777	0.0506089	0.0732404
Arhgap22	0.0013113	0.00248762	0	0.000548885
Arhgap23	0.0124005	0.0106531	0.0113743	0.0160317
Arhgap24	0.221248	0.182673	0.236623	0.221562
Arhgap25	0.00318351	0.00507717	0.00150574	0.00467311
Arhgap26	0.0210997	0.0141645	0.0144638	0.0183885
Arhgap27	0.0151105	0.00937194	0.0043004	0.00657956
Arhgap27os1	0.00257204	0.00166322	0.000595418	0.00769822
Arhgap27os2	0.0111598	0.00528298	0.00868123	0.00555527
Arhgap27os3	0.000431748	0	0	0
Arhgap28	0.0233488	0.0161549	0.0161764	0.0261732
Arhgap29	0.0734473	0.0881109	0.0915249	0.100436
Arhgap30	0.00843986	0.00777459	0.0068883	0.00801379
Arhgap31	0.00695379	0.00937685	0.0058556	0.00593429
Arhgap32	0.0565102	0.0576834	0.0571452	0.0538821
Arhgap33	0.00100441	0.0025095	0.00431413	0.00181586
Arhgap35	0.0682745	0.0624957	0.0561513	0.056782
Arhgap39	0.0188788	0.0173578	0.0158334	0.0125025
Arhgap4	0.00437399	0.00760224	0.0100699	0.00448744
Arhgap42	0.00166196	0.000858097	0.000861779	0.00317902
Arhgap44	0.0563813	0.0532495	0.0415621	0.047511
Arhgap5	0.296786	0.281115	0.294044	0.332327
Arhgap6	0.0248969	0.0214978	0.0271247	0.0437128
Arhgap8	0.00937438	0.00571349	0.0144667	0.0177588
Arhgap9	0.00522285	0.00518601	0.00101615	0.00356007
Arhgdia	0.17325	0.148799	0.180179	0.186775
Arhgdib	0.0438872	0.038859	0.0418684	0.037624
Arhgdig	0.00621018	0.00502109	0.00130724	0.00947409
Arhgef1	0.0979968	0.0892705	0.108319	0.125335
Arhgef10	0.0702271	0.0595419	0.0572205	0.0782468
Arhgef10l	0.0472258	0.0385919	0.039815	0.0439788
Arhgef11	0.0136734	0.0101247	0.0120669	0.0142619
Arhgef12	0.160791	0.167531	0.179106	0.169667
Arhgef15	0.00148065	0.00506035	0.00285991	0
Arhgef16	0.0655449	0.0711985	0.07036	0.0699165
Arhgef17	0.0519182	0.0467806	0.0437035	0.0889287
Arhgef18	0.0352055	0.0295913	0.0350344	0.0531467
Arhgef19	0.0441058	0.0507829	0.0506618	0.0449113
Arhgef2	0.078136	0.0775667	0.0595855	0.101677
Arhgef25	0.0122009	0.00871596	0.00453415	0.00601746
Arhgef26	0.0574941	0.0504895	0.034446	0.0366114
Arhgef28	0.025614	0.02181	0.034803	0.0662715
Arhgef3	0.0532175	0.0442293	0.0527244	0.0668288
Arhgef33	0.000550895	0.00111779	0	0.00106851
Arhgef37	0	0	0.000844913	0
Arhgef38	0.0605961	0.0450897	0.0335436	0.0511208
Arhgef39	0.000769055	0.000824274	0.00100369	0.00254207
Arhgef4	0.00531387	0.00402806	0.00405747	0.00392473
Arhgef40	0.0179127	0.0137746	0.0177095	0.043622
Arhgef5	0.0658475	0.0532979	0.0689235	0.114122
Arhgef6	0.00357114	0.00668806	0.00707815	0.0108356
Arhgef7	0.0317299	0.0317547	0.0303391	0.0332228
Arhgef9	0.00377913	0.00572128	0.00485046	0.0102009
Arid1a	0.163617	0.156249	0.165968	0.155173
Arid1b	0.0955007	0.0838095	0.0785402	0.0904758
Arid2	0.0734979	0.0851455	0.0879775	0.0902451
Arid3a	0.00104941	0.0011351	0.00151795	0
Arid3b	0.00729624	0.00643277	0.0115736	0.00371351
Arid4a	0.0866298	0.0779816	0.0648352	0.0707425
Arid4b	0.139564	0.129398	0.138138	0.15122
Arid5a	0.0122448	0.00597068	0.0121384	0.0341654
Arid5b	0.155196	0.129349	0.119142	0.128383
Arih1	0.0587717	0.067994	0.0673234	0.0723837
Arih2	0.026334	0.0340361	0.0243822	0.0458027
Arl1	0.205648	0.179099	0.181997	0.1739
Arl10	0.0231601	0.0137546	0.0155987	0.0143423
Arl11	0.00289828	0.00152042	0.00417741	0.00432765
Arl13b	0.067835	0.0524818	0.0649433	0.0838632
Arl14	0.0146556	0.00993057	0.00503149	0.0069898
Arl14ep	0.0291318	0.0208507	0.0240797	0.0185201
Arl15	0.00941046	0.0102647	0.0094359	0.0199102
Arl16	0.0216114	0.0256687	0.024666	0.0228115
Arl2	0.0568193	0.0593678	0.0447106	0.0653957
Arl2bp	0.0750694	0.0589333	0.0612761	0.0793413
Arl3	0.208477	0.194959	0.197283	0.214146
Arl4a	0.0628697	0.0548972	0.0887502	0.111351
Arl4aos	0	0	0	0
Arl4c	0.139017	0.132053	0.0787429	0.129716
Arl4d	0.00111723	0.000754901	0.000897276	0.0022736
Arl5a	0.105474	0.0867239	0.0758777	0.0913461
Arl5b	0.0204629	0.017093	0.0303741	0.0266727
Arl5c	0.00293764	0.00171099	0	0.00223963
Arl6	0.0527485	0.043653	0.0532115	0.0552253
Arl6ip1	0.495949	0.472416	0.482261	0.442707
Arl6ip4	0.111042	0.111108	0.104059	0.102127
Arl6ip5	0.272178	0.233557	0.216346	0.294068
Arl6ip6	0.0407714	0.0344169	0.0226586	0.0382823
Arl8a	0.0589102	0.0475463	0.0429185	0.0708023
Arl8b	0.0981489	0.0938585	0.0809471	0.0732912
Arl9	0.000356482	0	0	0
Armc1	0.0546408	0.0400066	0.0416251	0.0713813
Armc10	0.0550389	0.0507877	0.0465035	0.0516023
Armc2	0.00250576	0.00634543	0.00464172	0.00710137
Armc3	0.00295954	0.0035719	0.00427206	0.0019704
Armc4	0.000610468	0	0	0
Armc5	0.0245414	0.0198848	0.0185348	0.0172062
Armc6	0.00634061	0.00988932	0.00586925	0.0113973
Armc7	0.005905	0.00606195	0.00731601	0.000680408
Armc8	0.040003	0.0465686	0.0402123	0.0485652
Armc9	0.0225724	0.0249449	0.020924	0.022847
Armcx1	0.0614379	0.0552273	0.0407415	0.0489675
Armcx2	0.0516107	0.0371198	0.0408605	0.0333564
Armcx3	0.126763	0.12347	0.0739759	0.0933259
Armcx4	0.0188727	0.0177902	0.00463209	0.00588673
Armcx5	0.0164125	0.0216467	0.0217359	0.0141209
Armcx6	0.0233922	0.0234542	0.0158255	0.0137234
Armt1	0.0153838	0.0140526	0.021962	0.0273199
Arnt	0.0377254	0.0472303	0.031674	0.0409759
Arnt2	0.00239546	0	0	0
Arntl	0.0508092	0.044673	0.0544196	0.0532233
Arntl2	0.00278839	0	0	0.00540127
Arpc1a	0.140095	0.134443	0.121504	0.164655
Arpc1b	0.258169	0.20896	0.197152	0.303735
Arpc2	0.401047	0.329847	0.321678	0.406676
Arpc3	0.294783	0.259455	0.258854	0.323369
Arpc4	0.118369	0.106352	0.10052	0.139362
Arpc5	0.315919	0.277782	0.248003	0.322763
Arpc5l	0.14378	0.118506	0.113033	0.147813
Arpin	0.0135689	0.00834938	0.0175929	0.0688042
Arpp19	0.448645	0.421489	0.439683	0.444984
Arpp21	0	0	0	0
Arrb1	0.0289867	0.0231958	0.0396012	0.0737996
Arrb2	0.0318421	0.035973	0.0408099	0.0537387
Arrdc1	0.095369	0.0786281	0.101108	0.122473
Arrdc2	0.0140501	0.00978442	0.0145205	0.0137648
Arrdc3	0.0251246	0.0197647	0.0282493	0.0307083
Arrdc4	0.0384739	0.0303059	0.0358305	0.0453878
Arsa	0.00622127	0.00555587	0.0105888	0.00894621
Arsb	0.0455517	0.0317098	0.0371197	0.0410169
Arsg	0.00279713	0	0.0027061	0.00527525
Arsi	0	0	0	0
Arsj	0	0	0	0
Arsk	0.0295085	0.0340339	0.0428684	0.0484384
Art2b	0	0	0	0
Art3	0.000495365	0	0	0.00170771
Art4	0	0	0	0
Artn	0	0	0.00177407	0
Arv1	0.0105036	0.0142954	0.00851204	0.0136532
Arvcf	0.0424777	0.0481324	0.0375527	0.0707652
Arxes2	0.00610376	0.00236345	0.00677625	0.00316055
As3mt	0.0695762	0.0456331	0.0600498	0.0541062
Asah1	0.126668	0.104946	0.114792	0.115906
Asah2	0.017121	0.0154356	0.0157622	0.0152151
Asap1	0.0276422	0.0150859	0.0315163	0.0406364
Asap2	0.0446483	0.0468734	0.041218	0.0599868
Asap3	0.000963858	0.0008716	0.00122099	0.00241567
Asb1	0.00962074	0.00905394	0.00635517	0.00994426
Asb10	0	0	0.000777119	0
Asb13	0.0360164	0.0278603	0.0350712	0.0408319
Asb16	0.00022445	0.00195259	0	0
Asb2	0	0	0.00123089	0.00194455
Asb3	0.0217746	0.0155291	0.0263137	0.0275369
Asb4	0	0	0	0
Asb5	0	0	0.00108805	0
Asb6	0.0119528	0.0120811	0.00969678	0.0178261
Asb7	0.0271042	0.0222245	0.0304761	0.0454599
Asb8	0.0189425	0.0164205	0.0242712	0.0382784
Ascc1	0.0710864	0.0608279	0.0396312	0.0509254
Ascc2	0.0262896	0.0246478	0.0239569	0.0251404
Ascc3	0.0386379	0.0372335	0.0536576	0.0610315
Ascl1	0.000540081	0	0.00173002	0.00111496
Ascl2	0.00178908	0.00196906	0	0
Ascl3	0.00027184	0.000871171	0.000979567	0
Ascl4	0.000441836	0.000607003	0.000618976	0
Asf1a	0.0671903	0.0515044	0.0545253	0.0634901
Asf1b	0.000917418	0.00167937	0.00330154	0.00269638
Asgr2	0	0	0	0
Ash1l	0.233797	0.210381	0.228672	0.261246
Ash2l	0.0712104	0.0558218	0.0800268	0.0905127
Asic1	0	0	0.00100369	0
Asl	0.079567	0.0815396	0.0846642	0.0874592
Asna1	0.082884	0.0690903	0.0633829	0.0719749
Asns	0.00529877	0.000884671	0.00429303	0.00460693
Asnsd1	0.037785	0.0269593	0.0367315	0.0331928
Aspa	0.000350454	0	0	0
Asph	0.0774614	0.0734143	0.0822634	0.100309
Asphd1	0	0	0	0
Asphd2	0	0	0	0
Aspm	0.000512156	0	0	0.00373926
Aspn	0.000259317	0.000752475	0	0.00254207
Asprv1	0.000349698	0	0.000728123	0
Aspscr1	0.0481117	0.0519315	0.0387472	0.045421
Asrgl1	0.0301939	0.0216156	0.0253375	0.0163637
Ass1	0.0156418	0.0102033	0.0124267	0.0238652
Aste1	0.00866851	0.0061901	0.00545094	0.0204972
Astl	0	0	0	0
Astn2	0.0110059	0.0138951	0.00150802	0.00169738
Asun	0.0235044	0.0286901	0.0196342	0.0252003
Asxl1	0.0473306	0.038714	0.0411868	0.0468796
Asxl2	0.0789703	0.0704691	0.0799348	0.0603992
Asxl3	0.000493477	0.000775364	0.000569618	0.00127324
Asz1	0.00233929	0.000661807	0	0
Atad1	0.0949998	0.0685722	0.0926441	0.100106
Atad2	0.0118872	0.00677909	0.0139064	0.0101594
Atad2b	0.0330989	0.0330823	0.0239598	0.0217876
Atad3a	0.0495988	0.024786	0.0358675	0.0529288
Atad3aos	0.0124369	0.0149121	0.0165456	0.011585
Atad5	0.0130002	0.00843633	0.00910976	0.0202077
Atat1	0.0385225	0.0383845	0.0372971	0.0506759
Atcay	0	0	0	0
Atcayos	0	0	0	0
Ate1	0.0676839	0.0589185	0.062793	0.0605524
Atf1	0.0778555	0.070362	0.0636101	0.061769
Atf2	0.0810396	0.0688752	0.0653667	0.0805145
Atf3	0.0067145	0.00631991	0.00520788	0.0124393
Atf4	0.109705	0.103442	0.10462	0.166935
Atf5	0.0255432	0.0176898	0.0196668	0.0425185
Atf6	0.0536085	0.0477493	0.0495814	0.042427
Atf6b	0.0484232	0.0377519	0.0364679	0.0581652
Atf7	0.0618439	0.0610935	0.0726662	0.0769317
Atf7ip	0.106462	0.0865518	0.0958877	0.114543
Atg10	0.0257885	0.0126072	0.0247045	0.0263452
Atg101	0.0685934	0.0507175	0.0542252	0.0558936
Atg12	0.0748961	0.0624443	0.0681041	0.0991167
Atg13	0.0179395	0.0176665	0.0181151	0.0298227
Atg14	0.0282557	0.0269795	0.0324788	0.053855
Atg16l1	0.026569	0.0204912	0.018151	0.0244411
Atg16l2	0.0158475	0.00835821	0.0174196	0.00435807
Atg2a	0.0275185	0.0297561	0.0172501	0.0240645
Atg2b	0.0236111	0.017755	0.0202071	0.0235798
Atg3	0.117494	0.101182	0.111465	0.0954149
Atg4a	0.00718061	0.00946272	0.00535164	0.0134399
Atg4a-ps	0	0	0.000464489	0
Atg4b	0.0397151	0.0227107	0.0215675	0.0368157
Atg4c	0.0141611	0.0194793	0.0104485	0.0142665
Atg4d	0.0265989	0.0200032	0.0215478	0.0213663
Atg5	0.0545832	0.042287	0.0451767	0.0560752
Atg7	0.0163569	0.0160734	0.0145791	0.0195085
Atg9a	0.0103437	0.0102381	0.0144346	0.0136147
Atg9b	0	0.00084369	0	0.000548885
Athl1	0.0161458	0.0102005	0.0207904	0.0194762
Atic	0.0859286	0.0591858	0.0817894	0.0945751
Atl1	0.00952044	0.00762802	0.00645574	0.0098895
Atl2	0.0329604	0.0272364	0.0316353	0.0443659
Atl3	0.0547794	0.0393299	0.0566365	0.0670742
Atm	0.0225763	0.0246835	0.0344964	0.0385063
Atmin	0.0212207	0.0224235	0.0195525	0.0384592
Atn1.1	0.066183	0.0533018	0.0480111	0.0628891
Atoh8	0.00149467	0.00125478	0.00592286	0.00190042
Atox1	0.468908	0.396611	0.375859	0.382584
Atp10a	0.0292926	0.0359256	0.0441138	0.0455997
Atp10b	0	0.00131292	0	0.0135481
Atp11a	0.0941466	0.085433	0.0791495	0.101709
Atp11b	0.125861	0.089344	0.0737269	0.0850494
Atp11c	0.0245812	0.020003	0.0208672	0.0277137
Atp13a1	0.0322766	0.0394543	0.0339503	0.0363564
Atp13a2	0.0319056	0.0235593	0.0254269	0.0242621
Atp13a3	0.124982	0.124419	0.0920183	0.104897
Atp1a1	0.581057	0.574729	0.470902	0.386741
Atp1a2	0	0	0	0
Atp1a3	0.000438402	0.000858097	0.000766668	0
Atp1b1	0.907675	0.90219	0.778863	0.719524
Atp1b2	0.000699033	0	0.00137531	0.00240658
Atp1b3	0.0612325	0.0585548	0.0449233	0.105319
Atp1b4	0	0	0	0
Atp2a1	0	0	0	0
Atp2a2	0.109198	0.10319	0.100344	0.109735
Atp2a3	0.00400436	0.00605882	0.00821756	0.00768295
Atp2b1	0.162278	0.121879	0.107333	0.132967
Atp2b2	0	0	0	0
Atp2b4	0.00459513	0.00247563	0.00375638	0.00120531
Atp2c1	0.118605	0.110301	0.0987261	0.102009
Atp2c2	0.000420691	0	0	0.00205931
Atp4a	0.0187861	0.0158646	0.00866966	0.00207417
Atp5a1	0.494519	0.476186	0.504116	0.509122
Atp5b	0.591927	0.539032	0.561005	0.569554
Atp5c1	0.432399	0.378323	0.383676	0.365052
Atp5d	0.504597	0.472049	0.448885	0.465257
Atp5e	0.700366	0.699609	0.617478	0.624656
Atp5f1	0.35907	0.327266	0.31938	0.358304
Atp5g1	0.472181	0.449102	0.415009	0.422589
Atp5g2	0.564604	0.554122	0.531701	0.520465
Atp5g3	0.397032	0.361184	0.367923	0.375924
Atp5h	0.671226	0.703144	0.663144	0.610919
Atp5j	0.660377	0.663383	0.652419	0.633351
Atp5j2	0.586337	0.587512	0.537708	0.546444
Atp5k	0.595723	0.576059	0.564163	0.508912
Atp5l	0.673187	0.683536	0.629265	0.623436
Atp5o	0.299753	0.272148	0.249415	0.284379
Atp5s	0.0223442	0.013032	0.0213858	0.0199764
Atp5sl	0.0283241	0.0267257	0.0345664	0.0495729
Atp6ap1	0.139297	0.115933	0.11436	0.104719
Atp6ap2	0.104083	0.0864497	0.0964996	0.114324
Atp6v0a1	0.0229598	0.0307401	0.0135832	0.0222332
Atp6v0a2	0.0285657	0.0182006	0.0240481	0.0356506
Atp6v0a4	0	0	0	0.00205931
Atp6v0b	0.295936	0.26904	0.262362	0.256375
Atp6v0c	0.00197421	0.00657517	0.00207987	0.00428729
Atp6v0d1	0.0601316	0.0549259	0.0377383	0.0770028
Atp6v0d2	0.000904215	0	0	0
Atp6v0e	0.269921	0.212016	0.237222	0.288615
Atp6v0e2	0.0524603	0.0447446	0.0234357	0.0281919
Atp6v1a	0.127148	0.118643	0.123045	0.105213
Atp6v1b2	0.0503293	0.0446818	0.0533229	0.0578579
Atp6v1c1	0.0692447	0.0565915	0.0593449	0.0832875
Atp6v1d	0.137165	0.11546	0.106557	0.113503
Atp6v1e1	0.26685	0.239175	0.240572	0.235627
Atp6v1f	0.423255	0.394799	0.379621	0.392538
Atp6v1g1	0.392331	0.360394	0.39283	0.38354
Atp6v1g2	0.00375115	0.00748401	0.00512897	0.00252367
Atp6v1g3	0	0	0	0
Atp6v1h	0.0657019	0.0665808	0.0584232	0.0643624
Atp7a	0.0347952	0.0321513	0.0250136	0.0375976
Atp7b	0.0136051	0.0158555	0.0168116	0.0202975
Atp8a1	0.0160042	0.0174093	0.0142159	0.0308176
Atp8a2	0.00690026	0.00335047	0.00144813	0
Atp8b1	0.0270955	0.0258213	0.0494601	0.0535432
Atp8b2	0.0121655	0.0129089	0.0152959	0.00426535
Atp8b4	0	0.00288712	0.00265795	0.00134438
Atp8b5	0.00143307	0.000814602	0.00120356	0.00195686
Atp9a	0.10276	0.0973266	0.0867292	0.148919
Atp9b	0.0261532	0.033804	0.0351894	0.0384637
Atpaf1	0.0199245	0.0188389	0.0147029	0.025985
Atpaf2	0.0259496	0.0202224	0.0257798	0.0321281
Atpif1	0.688946	0.699053	0.6944	0.725617
Atr	0.0267175	0.0269345	0.0286255	0.0224455
Atraid	0.224462	0.210715	0.201099	0.210545
Atrip	0.00350523	0.00170539	0.00173648	0.00198223
Atrn	0.0484494	0.0387962	0.0423531	0.0454854
Atrnl1	0.0121509	0.0153748	0.0172331	0.0252625
Atrx	0.329564	0.299144	0.284807	0.313573
Atxn1	0.04881	0.0443158	0.0266798	0.047357
Atxn10	0.239157	0.196651	0.190059	0.236435
Atxn1l	0.0388884	0.0253978	0.0231028	0.0331129
Atxn2	0.0487267	0.0418917	0.0463671	0.0441519
Atxn2l	0.0476987	0.0468627	0.0397362	0.0584895
Atxn3	0.0221625	0.025324	0.0199029	0.0255068
Atxn7	0.0526225	0.0465125	0.0508954	0.0511684
Atxn7l1	0.0242525	0.0182624	0.0229392	0.015632
Atxn7l2	0.00321358	0.0033322	0.00372564	0.00153178
Atxn7l3	0.023677	0.0241339	0.0343042	0.0164788
Atxn7l3b	0.326491	0.282792	0.297252	0.325668
AU019823	0.0567027	0.0477976	0.042763	0.0632419
AU019990	0.000440483	0	0	0
AU020206	0.0111856	0.012357	0.0115631	0.0122682
AU021092	0.00205356	0.00385123	0	0.00263106
AU022252	0.0314183	0.0250323	0.0202555	0.0313155
AU022754	0.00692813	0.00449306	0.00202865	0.0108684
AU040320	0.0287352	0.0247725	0.0346999	0.0398169
AU041133	0.0281715	0.0248421	0.0189476	0.0270475
Auh	0.0712904	0.0673711	0.080426	0.0603698
Aunip	0.000805169	0	0	0
Aup1	0.0874984	0.0729855	0.0806972	0.0908208
Aurka	0.000865697	0.000860178	0	0
Aurkaip1	0.216501	0.185502	0.172711	0.193677
Aurkb	0.000917472	0.00168938	0.000866426	0
Aurkc	0	0	0	0
Auts2	0.0951587	0.0697213	0.0837235	0.0748597
AV099323	0.004557	0.0060317	0.00786398	0.0115348
Aven	0.0203549	0.0205579	0.0192138	0.0217666
Avil	0	0.00385272	0	0
Avl9	0.0589947	0.0532192	0.0542249	0.0530762
Avpi1	0.0743867	0.069531	0.0606672	0.0790762
Avpr1a	0	0	0	0
Avpr2	0	0	0	0
AW011738	0.0188916	0.00770464	0.00854858	0.00601796
AW112010	0.0498901	0.0435276	0.0561638	0.0606398
AW146154	0.0206237	0.0190137	0.0298991	0.0243183
AW209491	0.0327784	0.0160428	0.0320052	0.0216527
AW549877	0.0328408	0.033173	0.0217234	0.0380519
AW551984	0	0	0	0
AW554918	0.0204168	0.0187211	0.0188388	0.0136794
Awat2	0.000820282	0.000927635	0.00228896	0.00139721
Axdnd1	0	0.00183847	0	0
Axin1	0.0239433	0.0161702	0.0277115	0.0309511
Axin2	0.00938535	0.00359162	0.00718734	0.015995
Axl	0.00451094	0.00610858	0.00334757	0.0215519
AY036118	0.690795	0.715476	0.718035	0.655294
AY074887	0.00200574	0.000929433	0	0
AY358078	0	0	0	0
Azgp1	0.000210599	0.000713658	0.00163982	0
Azi2	0.12515	0.11639	0.119943	0.11752
Azin1	0.0400178	0.0451391	0.0450444	0.0662331
Azin2	0.017117	0.00900439	0.0140792	0.0287334
B130006D01Rik	0.0103038	0.00680299	0.00781389	0.00735375
B130046B21Rik	0	0.000831201	0	0.00126685
B230110C06Rik	0.00086731	0.000752475	0.000655276	0
B230118H07Rik	0.0923656	0.0778937	0.0836347	0.0756899
B230208H11Rik	0.00900228	0.00564307	0.000801334	0.00357813
B230217C12Rik	0.0053816	0.00525486	0.00147599	0.00124717
B230217O12Rik	0	0.00240647	0.00145492	0.00298095
B230219D22Rik	0.215	0.190065	0.174898	0.194511
B230303O12Rik	0.00452387	0.00160691	0.00431045	0.00473674
B230307C23Rik	0.0167559	0.0195641	0.0150853	0.022061
B230312C02Rik	0	0.000885262	0	0
B230317F23Rik	0.00409874	0.00795789	0.00313611	0.0019158
B230322F03Rik	0.00778487	0.00256026	0.00688018	0.00532795
B230334C09Rik	0	0	0	0
B230344G16Rik	0	0	0	0
B230354K17Rik	0.0210836	0.0102767	0.0157021	0.0175137
B230369F24Rik	0.00453271	0.00214201	0.000893482	0.00382565
B230398E01Rik	0.00106908	0.00156337	0.00100699	0.00223833
B2m	0.533065	0.453109	0.555953	0.718193
B3galnt1	0.00226016	0.00339194	0.00493002	0.00380637
B3galnt2	0.0259535	0.0362201	0.0283975	0.0286335
B3galt1	0.0020504	0	0	0.000680408
B3galt2	0	0	0	0
B3galt4	0.00793344	0.00779545	0.00557192	0.0127226
B3galt5	0.000755781	0	0	0
B3galt6	0.0182513	0.0101262	0.0097185	0.0127043
B3gat2	0.000459999	0	0	0
B3gat3	0.0575059	0.0458336	0.0665576	0.0790942
B3glct	0.02726	0.0267797	0.0347827	0.0475485
[truncated: 15,450 more rows]

## Sheet: Monocle Module list
id	module	supermodule	dim_1	dim_2
Adh5	1	1	0.572433	-2.43801
Adk	1	1	0.90275	-1.96019
Akr1a1	1	1	1.02879	-1.97301
Aldoa	1	1	0.771291	-2.66801
Ambp	1	1	0.817826	-2.59137
Atp5c1	1	1	0.870017	-2.16768
Atp5d	1	1	0.57412	-2.39169
Atp5f1	1	1	0.516807	-2.10945
Atp6ap2	1	1	0.483259	-1.89997
Aurkaip1	1	1	0.823172	-1.66327
Bcap31	1	1	0.548524	-2.43004
Bex4	1	1	0.890597	-1.62053
C2cd4b	1	1	0.705242	-2.21568
Cbr1	1	1	0.412107	-2.55422
Cd81	1	1	0.543494	-2.01547
Ces1d	1	1	0.908531	-2.47296
Cisd3	1	1	0.571905	-2.47243
Cldn10	1	1	1.18275	-2.25755
Cldn8	1	1	1.27288	-2.10524
Cmc2	1	1	0.527563	-2.51808
Cops6	1	1	0.579126	-2.26811
Cox4i1	1	1	0.985766	-2.5288
Cyb5a	1	1	0.984807	-2.21633
Cyc1	1	1	0.71942	-1.68427
Dad1	1	1	1.25999	-2.19033
Dhrs7	1	1	0.72536	-1.8303
Diablo	1	1	0.422968	-1.83895
Dnajc3	1	1	0.477548	-2.22432
Dync2li1	1	1	0.84868	-2.14425
Ebpl	1	1	0.714688	-2.26459
Ech1	1	1	0.964771	-2.12251
Eci1	1	1	0.52152	-2.40326
Eif3m	1	1	0.72541	-2.27866
Eif6	1	1	1.05482	-1.93411
Fam103a1	1	1	0.589494	-2.60092
Ggh	1	1	0.583354	-2.20897
Gjb1	1	1	1.16924	-2.35347
Glod4	1	1	0.92243	-2.32154
Grpel1	1	1	0.853636	-1.94333
Gsta3	1	1	1.01962	-2.52919
Gstm1	1	1	0.808364	-2.60156
Gstm5	1	1	0.998222	-1.99739
Gstt1	1	1	0.843302	-2.5289
Hmgb1	1	1	0.698939	-1.70384
Hrsp12	1	1	0.933814	-1.97367
Igbp1	1	1	0.738902	-1.75682
Itm2b	1	1	0.755367	-2.10541
Jazf1	1	1	0.609512	-1.89509
Laptm4a	1	1	0.537285	-2.04143
Map1lc3a	1	1	0.922153	-1.77804
Marc2	1	1	0.685765	-2.16404
Mcee	1	1	1.18261	-2.12828
Mgst1	1	1	0.768235	-2.48078
Mgst3	1	1	1.11272	-2.50167
Mpc2	1	1	1.06155	-2.47451
Mrpl18	1	1	1.09936	-2.08742
Mrps18a	1	1	0.538775	-1.89045
Mrps33	1	1	0.824473	-1.6706
Mt1	1	1	0.477479	-1.90695
Myg1	1	1	0.789399	-1.9183
Ndufa4	1	1	0.944987	-2.49996
Ndufa8	1	1	0.519071	-1.97394
Ndufab1	1	1	0.873777	-2.51986
Ndufb8	1	1	0.869603	-2.43401
Ndufs4	1	1	1.16787	-2.17101
Ndufs5	1	1	1.14598	-2.48932
Ndufv1	1	1	0.708753	-2.33489
Nenf	1	1	0.912357	-2.37484
Park7	1	1	1.20076	-2.47092
Pdia6	1	1	0.661964	-2.16398
Pla2g16	1	1	0.816934	-1.81224
Polr2i	1	1	0.725453	-2.57098
Ppib	1	1	1.33526	-2.06911
Prdx2	1	1	1.02577	-2.00538
Psma2	1	1	0.868148	-1.99554
Psmb1	1	1	1.30897	-2.13639
Psmb2	1	1	0.577222	-2.47911
Psmb3	1	1	0.637019	-1.9829
Psmb4	1	1	0.793392	-2.22317
Psmb6	1	1	1.13177	-2.15766
Psmb7	1	1	0.502975	-2.45321
Psmd4	1	1	0.762733	-1.56448
Qpct	1	1	0.763249	-2.61781
Reep5	1	1	0.483055	-2.32174
Rnh1	1	1	0.905089	-1.87086
Sar1b	1	1	1.2253	-2.03164
Sat1	1	1	0.93996	-2.04884
Sdhb	1	1	1.03802	-2.31272
Sec62	1	1	0.974068	-2.49272
Selenbp1	1	1	0.533937	-2.21889
Sf3b6	1	1	0.847723	-2.1776
Slc25a4	1	1	0.694939	-2.21004
Slc25a5	1	1	0.981932	-2.63669
Spcs2	1	1	0.787479	-2.14418
Taldo1	1	1	0.869237	-2.28387
Tm2d3	1	1	0.991136	-1.89576
Tmed2	1	1	0.711599	-1.70999
Tmem50a	1	1	0.871142	-1.63703
Tmem59	1	1	0.7674	-1.97666
Tstd1	1	1	0.955845	-2.4332
U2af1	1	1	0.613478	-1.55634
Uap1	1	1	0.974362	-1.83657
Ubb	1	1	0.527052	-2.05962
Uqcrb	1	1	1.02972	-2.60035
Uqcrc2	1	1	0.888917	-1.62182
Uqcrfs1	1	1	0.888385	-1.99624
Vbp1	1	1	0.5521	-1.82961
Vdac2	1	1	0.709548	-1.96075
Yipf4	1	1	0.668029	-1.92873
Zap70	1	1	0.570272	-1.82438
0610007P14Rik	2	1	-0.19355	-1.61077
1110004E09Rik	2	1	-0.224988	-1.97691
1110065P20Rik	2	1	-0.450454	-1.88584
1810037I17Rik	2	1	-0.369088	-1.2408
Actr10	2	1	0.302796	-1.22435
Alox12	2	1	-0.123906	-1.58385
Anp32a	2	1	0.364322	-1.58985
Anp32b	2	1	-0.340464	-1.10704
Arfrp1	2	1	-0.00193774	-1.38734
Atp2b1	2	1	0.00483081	-1.72609
Atp5a1	2	1	0.265243	-1.87896
Atxn10	2	1	0.440795	-1.69956
Bbx	2	1	-0.552041	-1.62172
Bccip	2	1	-0.364432	-1.79286
Bphl	2	1	0.150065	-1.87102
Calm2	2	1	0.199561	-1.562
Calr	2	1	-0.0390706	-1.98999
Camk1	2	1	0.205228	-1.22413
Capg	2	1	0.0246996	-1.89869
Capsl	2	1	-0.144488	-1.80767
Capza2	2	1	-0.382306	-1.31165
Cblc	2	1	-0.291559	-1.4388
Ccdc53	2	1	-0.10049	-1.33831
Cebpzos	2	1	-0.669244	-1.98843
Chchd1	2	1	-0.205374	-1.44466
Cldn3	2	1	-0.676015	-1.19406
Copb1	2	1	-0.0624349	-1.8449
Cpne8	2	1	-0.301801	-1.02
Ctsl	2	1	-0.223559	-1.17605
Cyp20a1	2	1	0.189765	-1.71134
Ddx1	2	1	0.2361	-1.72834
Dnajc15	2	1	-0.502768	-1.6845
Dnajc2	2	1	0.172133	-1.22755
Ehd1	2	1	-0.247654	-1.23914
Eif3i	2	1	-0.541086	-1.29485
Eif4a1	2	1	-0.539655	-1.46826
Epcam	2	1	-0.179222	-1.28065
Erh	2	1	0.214669	-1.9275
Etfa	2	1	0.145646	-1.48872
Exosc8	2	1	-0.380628	-1.6674
Fam92a	2	1	-0.239189	-1.34039
Fkbp4	2	1	-0.0098849	-1.73405
G3bp2	2	1	-0.409052	-1.59018
Gclm	2	1	0.0561151	-1.81632
Gopc	2	1	0.22819	-1.6775
Hdgfrp2	2	1	0.206418	-1.55552
Hnrnpa2b1	2	1	-0.0967191	-2.0778
Hnrnpf	2	1	-0.44451	-1.93902
Hnrnpk	2	1	0.0478068	-2.01429
Hsp90b1	2	1	-0.340103	-2.1173
Hspd1	2	1	0.298813	-1.43127
Ift43	2	1	-0.367689	-1.55577
Kat6a	2	1	0.00755463	-1.23426
Kif2a	2	1	-0.809788	-1.77852
Mak16	2	1	0.044865	-1.26197
Manf	2	1	-0.692847	-1.51929
Med28	2	1	-0.442622	-1.23934
Mettl5	2	1	-0.853777	-1.92553
Mpc1	2	1	-0.546654	-1.2062
Mrpl17	2	1	0.282456	-1.93165
Mrpl51	2	1	0.0450702	-1.26877
Msh2	2	1	-0.627586	-1.94264
Nagk	2	1	-0.4212	-1.09268
Ndufb6	2	1	-0.534377	-1.6934
Ngfrap1	2	1	-0.388565	-1.83871
Nmt1	2	1	0.0668186	-1.28801
Nsfl1c	2	1	-0.964838	-1.67248
Pdcl3	2	1	-0.273027	-1.41776
Pisd	2	1	-0.597171	-1.57395
Plin2	2	1	0.312623	-2.01268
Pnkp	2	1	-0.109557	-1.85263
Pole3	2	1	0.0982192	-1.51331
Ppia	2	1	-0.232224	-1.97955
Prdx3	2	1	0.347027	-1.65052
Prmt1	2	1	-0.0271939	-1.19303
Psma4	2	1	0.222515	-1.85803
Psmb5	2	1	-0.195148	-1.49908
Psmc2	2	1	-0.0430463	-1.73434
Psmd1	2	1	-0.31618	-1.41485
Psmd7	2	1	-0.0199565	-1.75878
Psmd8	2	1	-0.493356	-1.28403
Ptgr1	2	1	-0.0221642	-2.07008
Pts	2	1	-0.376276	-1.19977
Raly	2	1	0.198028	-1.30242
Ran	2	1	0.0613857	-1.5758
Rap1b	2	1	0.0430245	-1.50526
Rexo2	2	1	-0.122623	-1.54149
Rgs18	2	1	-0.123142	-2.11155
Rheb	2	1	-0.186655	-1.68355
Rpl7a-ps3	2	1	-0.335787	-1.03592
Rpl7l1	2	1	-0.394655	-1.70321
Scamp3	2	1	0.464275	-1.71722
44089	2	1	0.229744	-1.50343
Snrpe	2	1	-0.30567	-1.33016
Spag7	2	1	-0.288672	-1.20818
Srp14	2	1	0.248055	-1.36176
Ssbp1	2	1	-0.484493	-1.88404
Ssu72	2	1	0.173748	-1.67705
Syf2	2	1	0.307991	-1.41382
Tkt	2	1	-0.332753	-1.62997
Tmc4	2	1	-0.105754	-1.68461
Trp53cor1	2	1	0.317326	-1.45232
Upf2	2	1	-0.667921	-1.82717
Vps29	2	1	0.291754	-1.93569
Ywhae	2	1	-0.28533	-1.10372
4933429H19Rik	3	1	-1.75199	0.0996648
Aars	3	1	-2.14408	-0.680869
Adgre5	3	1	-1.5221	-0.304458
Adgrv1	3	1	-2.39354	-1.03512
Ankrd1	3	1	-1.75124	-0.467208
Anxa2	3	1	-1.96825	-0.336153
Apobec3	3	1	-2.48257	-0.446145
Arf6	3	1	-1.63393	-0.190069
Atxn2	3	1	-1.43039	-0.197312
Bcl3	3	1	-3.0609	-0.292295
Bcl7c	3	1	-2.13703	-0.0742366
Birc3	3	1	-1.99447	-0.368006
Bok	3	1	-2.52526	-0.643375
C3	3	1	-2.75294	-0.528687
Cacul1	3	1	-2.13534	-0.383224
Casp4	3	1	-2.58215	-0.823047
Ccl20	3	1	-2.2756	-0.960956
Cd47	3	1	-2.08343	-0.592288
Cdkn1a	3	1	-2.45059	-0.775824
Chac1	3	1	-2.24192	-0.551065
Cldn4	3	1	-1.85275	0.0309568
Clic4	3	1	-2.66256	-0.665504
Crybg3	3	1	-2.21952	-0.749846
Ctnna1	3	1	-1.80618	-0.0901116
Cxcl16	3	1	-2.15044	-0.191223
Cyth2	3	1	-1.54566	-0.181995
D630011A20Rik	3	1	-2.06219	-0.58936
Ddah2	3	1	-1.83524	-0.210541
Ddx21	3	1	-2.14684	-0.540105
Dpy30	3	1	-1.46436	0.0235293
Dynll1	3	1	-2.03973	0.1091
Efhd2	3	1	-1.91697	0.00324586
Emc1	3	1	-2.26155	-0.261078
Etf1	3	1	-1.38753	-0.246675
F11r	3	1	-2.17498	-0.00291214
Fam49b	3	1	-2.13272	-0.417491
Fkbp1a	3	1	-1.6642	-0.268612
Flna	3	1	-2.05406	-0.335567
Fxyd6	3	1	-1.92636	-0.448921
Gadd45b	3	1	-1.64931	0.00529578
Glipr2	3	1	-1.89929	-0.211677
Gpm6b	3	1	-2.31218	0.146471
H2afy	3	1	-1.49398	0.100064
Hecw2	3	1	-1.80024	-0.394306
Hnrnpab	3	1	-1.59783	-0.180275
Htra2	3	1	-1.70925	0.027225
Icam1	3	1	-2.28414	-0.663382
Ifngr1	3	1	-1.876	-0.398028
Inppl1	3	1	-1.58165	-0.0812099
Iqub	3	1	-2.41511	0.00695196
Lasp1	3	1	-1.88568	-0.287645
Lhfp	3	1	-2.26625	-0.367979
Lmna	3	1	-1.80448	-0.3865
Ltb	3	1	-2.47101	-0.859679
Mlph	3	1	-2.53534	-0.441492
Myl12a	3	1	-1.72257	-0.405788
Myl12b	3	1	-1.9237	0.143805
Neurl3	3	1	-2.51351	-0.812525
Nfkb2	3	1	-2.32511	-0.471984
Nfkbia	3	1	-2.49302	-0.528794
Nfkbie	3	1	-2.42563	-0.731849
Nop14	3	1	-2.01924	-0.0565606
Osbpl3	3	1	-1.50297	-0.337698
Pak3	3	1	-2.16566	-0.227635
Pam	3	1	-2.62853	-0.240153
Pdlim4	3	1	-2.51	-0.152849
Plscr3	3	1	-1.54573	0.066092
Pmepa1	3	1	-3.15672	-0.114126
Ppp1r14b	3	1	-2.01829	-0.44613
Ppp2r1a	3	1	-1.63375	-0.278956
Ptbp3	3	1	-2.51196	-0.586433
Ptp4a1	3	1	-1.77857	-0.342486
Pvrl2	3	1	-1.6102	0.0606945
Rabep1	3	1	-1.62844	0.221468
Rasl10a	3	1	-1.38706	-0.148609
Relb	3	1	-2.39925	-0.695603
Rhob	3	1	-1.71057	-0.447148
Rras	3	1	-1.97037	0.104398
S100a10	3	1	-2.09352	-0.124637
S100a11	3	1	-1.99934	-0.223333
Samd9l	3	1	-2.32102	-0.320213
44081	3	1	-1.68106	-0.321054
Serpinb6b	3	1	-1.98623	0.0287298
Serpinb9	3	1	-1.91391	-0.329875
Sfn	3	1	-3.56652	0.156424
Shisa4	3	1	-1.92533	-0.500666
Smek1	3	1	-1.59527	0.00846317
St14	3	1	-1.34972	-0.0621524
Stx11	3	1	-2.51935	-0.159576
Tapbp	3	1	-2.25262	-0.701706
Tgfb2	3	1	-1.72632	-0.473298
Tnfrsf12a	3	1	-1.76516	-0.466637
Tnip1	3	1	-2.05981	-0.37339
Trp53inp1	3	1	-2.21626	-0.919952
Ttc19	3	1	-2.02246	-0.0369805
Vars	3	1	-2.0895	-0.77934
Vcam1	3	1	-2.71124	-0.551794
Wasf2	3	1	-1.7512	0.0694055
Ywhah	3	1	-1.72514	-0.421835
Zc3h12d	3	1	-1.77993	0.0288499
Zfp36l1	3	1	-1.77579	-0.304479
Zscan22	3	1	-1.51846	0.052014
0610011F06Rik	4	1	3.37322	0.0398099
2310001H17Rik	4	1	3.27125	0.772224
3110079O15Rik	4	1	3.05271	0.597137
4931406C07Rik	4	1	2.8486	0.572143
A230001M10Rik	4	1	2.7997	0.269668
Adamts16	4	1	2.95563	0.663695
Adrb2	4	1	3.45926	0.809933
Aif1l	4	1	2.71117	0.182414
Aldh1b1	4	1	3.4443	0.409367
Aldh1l1	4	1	3.3426	0.488749
Aldoc	4	1	3.44776	0.453872
Ap3s1	4	1	2.5346	0.278958
Apcs	4	1	3.24966	-0.189827
Apoc1	4	1	3.27189	0.407156
Apoe	4	1	3.37684	0.0797555
Atp1a1	4	1	2.92946	0.638892
Bzw2	4	1	3.09069	0.130536
Cbs	4	1	3.36674	0.600044
Cda	4	1	2.89425	0.163183
Clec1a	4	1	2.56202	0.024086
Commd6	4	1	2.57588	0.324704
Creb3l1	4	1	2.48866	-0.0132503
Crp	4	1	3.17921	0.311413
Cyb561	4	1	2.96543	-0.207661
Cyp2j5	4	1	3.39836	0.615025
Cyp4f15	4	1	3.4514	0.700568
Dbi	4	1	3.30539	-0.0294099
Dclre1a	4	1	2.96609	0.306466
Dcx	4	1	3.52015	0.5735
Ddt	4	1	3.22435	-0.0823757
Degs1	4	1	3.34341	0.371559
Ecscr	4	1	3.22464	0.0301162
Eef2	4	1	2.43505	0.089402
Enho	4	1	3.25921	0.0940179
Fads2	4	1	2.99629	0.212294
Fam65b	4	1	3.18728	0.647856
Fmo1	4	1	3.23312	0.49398
Gamt	4	1	2.69925	0.173871
Gas2	4	1	3.37211	0.70471
Gcsh	4	1	3.46994	0.755956
Gm37350	4	1	3.23482	0.500525
Gm5420	4	1	3.49441	0.462474
Gm5546	4	1	3.18272	0.00867072
Gmnn	4	1	3.40974	0.790045
Gpx2	4	1	3.51377	0.600815
Gstt2	4	1	3.26101	0.17392
Gucy1a3	4	1	2.968	0.419625
Hacd1	4	1	2.92877	0.406202
Hilpda	4	1	3.43379	0.640773
Homer2	4	1	3.51474	0.381198
Hs6st2	4	1	3.35817	0.774277
Hspa2	4	1	3.15597	0.552299
Hspe1	4	1	2.6951	0.369183
Id2	4	1	3.07715	0.415699
Igfbpl1	4	1	3.21762	0.671188
Kcne3	4	1	3.32315	0.663705
Kctd1	4	1	3.05171	0.547972
Lifr	4	1	3.36866	0.689832
Lims1	4	1	2.76913	0.361192
Lipt2	4	1	2.82418	0.193101
Lmcd1	4	1	3.38019	0.262767
Mdk	4	1	2.96312	0.466116
Mia	4	1	2.91033	0.434198
Mmd2	4	1	3.22218	0.541965
Myo1b	4	1	2.92089	0.712372
Ncald	4	1	2.88987	0.597743
Ntrk2	4	1	3.04032	0.478808
Nucb2	4	1	3.34631	0.582041
Nudt19	4	1	2.99661	-0.149161
Oat	4	1	3.35933	0.482864
Olfml2a	4	1	2.91517	0.714216
Pcyt1b	4	1	3.4086	0.434774
Pdcd4	4	1	2.90563	0.61907
Pebp1	4	1	3.17204	0.120055
Prox2os	4	1	2.6774	0.0321293
Qsox1	4	1	3.02937	0.179528
Rgs2	4	1	3.25519	0.0264993
Sbspon	4	1	2.63176	0.169868
Scd2	4	1	3.10401	0.674675
Sfrp4	4	1	3.25331	-0.0647245
Sh3bgrl3	4	1	3.40515	0.172397
Shisa5	4	1	3.3446	0.629445
Snhg18	4	1	3.27828	0.401553
Spata18	4	1	3.28907	0.0767547
Spp1	4	1	3.36511	0.49076
Sptssa	4	1	2.5886	0.125546
Stard4	4	1	2.86787	-0.096299
Stra6l	4	1	3.4127	0.758308
Sult1a1	4	1	3.20035	0.759414
Taf15	4	1	3.17494	-0.558838
Tbc1d4	4	1	3.41573	0.760073
Tmem237	4	1	3.03457	0.0497598
Tmem97	4	1	3.05888	0.533771
Traf4	4	1	2.6622	0.136707
Tspan7	4	1	3.1711	0.405642
Tst	4	1	3.30985	0.552025
Ttyh1	4	1	2.88909	0.445885
Ube2e3	4	1	2.68809	0.168701
Ugt2b35	4	1	3.11675	0.418529
Wfdc15b	4	1	2.63452	0.346963
Wfdc3	4	1	3.28575	0.59705
6030408B16Rik	5	1	0.241926	1.21662
Aff4	5	1	0.19507	0.841294
Anpep	5	1	0.233143	1.09538
Arid4b	5	1	0.547254	0.612365
Ash1l	5	1	0.587869	1.09484
Atxn7l3b	5	1	0.284764	0.875206
Bag4	5	1	0.467272	0.587803
Baz2b	5	1	0.257928	1.1009
Bmpr1a	5	1	0.423946	1.41999
Bnip2	5	1	0.40978	1.227
Bptf	5	1	0.729285	1.20433
Camk2d	5	1	0.600324	1.22384
Cebpz	5	1	0.663953	0.0803788
Col4a1	5	1	0.716012	0.176493
Ctdnep1	5	1	0.543765	0.308431
Cwf19l2	5	1	0.497338	0.603992
Dhx15	5	1	0.282862	1.03702
Dnajc10	5	1	0.239742	0.833951
Dsp	5	1	0.363605	1.26324
Eea1	5	1	0.512674	0.717961
Fgfr1op2	5	1	0.400451	1.32154
Get4	5	1	0.728852	0.524429
Glud1	5	1	0.815123	0.232292
Golgb1	5	1	0.464981	1.48772
Gpbp1	5	1	0.627833	1.1084
Gtf2i	5	1	0.669639	0.868669
Hist1h1e	5	1	0.608147	0.345331
Hnrnpul2	5	1	0.610726	1.07594
Idnk	5	1	0.377833	0.718276
Jmy	5	1	0.329247	0.568823
Kdm1a	5	1	0.498449	1.00209
Lrrfip2	5	1	0.307629	1.11406
Macf1	5	1	0.36648	1.17121
Man1a2	5	1	0.365105	0.725277
Manbal	5	1	0.516279	0.982369
Mapk9	5	1	0.396922	0.122505
Metap2	5	1	0.497737	1.18181
Mfsd11	5	1	0.611379	1.43157
Mmp11	5	1	0.602787	0.547128
Mrpl32	5	1	0.530076	0.250454
Mrps12	5	1	0.464556	0.76569
Mrps5	5	1	0.481608	0.483683
Mtch1	5	1	0.460985	1.00734
Mtdh	5	1	0.417968	0.0201558
Myo10	5	1	0.528011	1.24007
Nap1l1	5	1	0.259418	0.900967
Nars	5	1	0.613674	0.114862
Ncor1	5	1	0.312709	0.985603
Nfia	5	1	0.306795	1.18872
Nr3c1	5	1	0.208556	0.85034
Phax	5	1	0.67948	0.7437
Pof1b	5	1	0.359764	0.792055
Pop5	5	1	0.760725	0.515381
Por	5	1	0.532276	0.779965
Ppp1cc	5	1	0.308335	1.29141
Ppp2r3a	5	1	0.507103	1.4112
Ppp2r5e	5	1	0.506356	0.896811
Prrc2c	5	1	0.576346	1.45706
Pxk	5	1	0.17845	1.04054
Rtn3	5	1	0.146574	1.08448
Scara3	5	1	0.620418	0.382632
Setd2	5	1	0.733421	1.24848
Sf3b1	5	1	0.652258	0.222155
Sf3b2	5	1	0.388731	1.15031
Sh3glb1	5	1	0.455593	1.15141
Slu7	5	1	0.482589	0.602556
Smarca5	5	1	0.269542	0.922701
Smarcc2	5	1	0.60023	0.496402
Smarcd2	5	1	0.309142	0.883486
Smek2	5	1	0.437187	0.63923
Snx7	5	1	0.541845	0.62448
Srebf2	5	1	0.44046	0.348151
Stambp	5	1	0.317186	0.893088
Strbp	5	1	0.197452	1.06664
Taok3	5	1	0.644671	1.31374
Tbx6	5	1	0.653499	0.440947
Tcf25	5	1	0.557092	0.52103
Tdrd12	5	1	0.447488	1.27167
Tgoln1	5	1	0.309427	1.11297
Tnfsf12	5	1	0.776313	1.28506
Trpc4ap	5	1	0.374761	0.966554
Tsc22d1	5	1	0.368064	0.754338
Tspyl2	5	1	0.359221	0.520442
Ttc3	5	1	0.796001	0.227983
U2surp	5	1	0.520425	0.762298
Ubxn2a	5	1	0.467301	0.87224
Usp15	5	1	0.464788	1.22108
Vps4a	5	1	0.727494	0.387385
Wdr45b	5	1	0.479702	1.10624
Wnk2	5	1	0.688164	1.29006
Ythdc1	5	1	0.270208	1.02981
Ywhab	5	1	0.188783	0.803634
Zbtb38	5	1	0.681734	0.602615
Zfp184	5	1	0.263872	0.900408
Zzef1	5	1	0.41861	1.23349
Actr2	6	1	0.365322	1.93338
Adck3	6	1	0.194185	2.22048
Ahcyl1	6	1	0.784579	1.86395
Arid1a	6	1	0.207097	2.28568
Auts2	6	1	0.482597	2.054
C230034O21Rik	6	1	1.05414	1.54888
Car2	6	1	0.737068	2.45692
Ccni	6	1	0.338175	2.42088
Cd99l2	6	1	0.40866	2.19562
Cdk19	6	1	0.395417	1.90565
Chdh	6	1	0.20574	2.04387
Clmn	6	1	0.969256	2.05417
Cmip	6	1	0.37715	2.28138
Col4a3bp	6	1	0.281137	2.02974
Cox16	6	1	1.08185	1.83163
Crebbp	6	1	0.326026	2.01941
Ctnnd1	6	1	1.26212	2.02903
Dab2ip	6	1	0.0537579	2.22814
Dnmt3a	6	1	0.630574	1.44043
Dock7	6	1	0.704466	2.36976
Eif4g1	6	1	1.0458	2.03749
Enah	6	1	0.383455	2.05723
Erbb2ip	6	1	0.279102	2.02801
Fads6	6	1	0.516317	2.21597
Fubp3	6	1	0.9442	1.76189
Gm15401	6	1	0.599165	2.10079
Gm16503	6	1	0.539433	2.0135
Golga4	6	1	0.766337	1.62021
Gpd1l	6	1	0.0038192	2.16967
H1f0	6	1	0.238902	2.06186
Hamp2	6	1	0.392359	2.14878
Hmgn5	6	1	0.0939403	2.24742
Ids	6	1	0.246835	2.15532
Ino80b	6	1	0.788701	1.9818
Insig2	6	1	0.855639	1.49422
Kansl1l	6	1	0.563367	2.26196
Kcnq1ot1	6	1	-0.0619491	2.41599
Klf3	6	1	0.0723198	2.09457
Kmt2e	6	1	-0.0877866	2.2492
Lama4	6	1	0.753652	1.79906
Larp1	6	1	0.630793	1.94101
Lima1	6	1	0.742113	2.13008
Lmo4	6	1	0.652131	1.86243
Lrp6	6	1	0.576761	2.06922
Luc7l2	6	1	-0.00491072	2.37281
Magi3	6	1	1.19053	1.97397
Mapkap1	6	1	0.598388	1.96199
Mast4	6	1	0.60289	1.57337
Matr3	6	1	0.809084	1.76637
Mprip	6	1	0.662035	1.72518
Mta1	6	1	1.22567	1.62533
Mycbp2	6	1	0.853715	1.66968
Nfib	6	1	0.430229	2.10429
Nfic	6	1	0.1755	2.17403
Nfix	6	1	0.0411486	2.32453
Nktr	6	1	0.761848	1.71936
Nsd1	6	1	0.84173	1.63524
Ogdh	6	1	0.581664	1.65145
Onecut1	6	1	0.0913495	2.05826
Parp4	6	1	1.10914	2.05747
Pcnt	6	1	0.81806	2.03328
Phldb2	6	1	0.200618	2.2811
Ppp3ca	6	1	0.877481	1.52697
Prpf8	6	1	0.140464	2.32755
Ptprg	6	1	1.01579	1.8766
Pum2	6	1	0.726349	2.19187
Pura	6	1	0.29131	2.08954
Ralbp1	6	1	1.20008	1.87414
Rfxap	6	1	1.14352	1.55984
Rnf11	6	1	0.870087	1.80733
Rprd2	6	1	0.735251	1.70453
Setd5	6	1	0.810422	2.03854
Sfswap	6	1	0.711157	1.75529
Slc16a2	6	1	0.701651	1.99384
Smarca2	6	1	0.711346	1.38364
St13	6	1	0.555848	1.52373
Stag2	6	1	0.304849	2.25298
Tes	6	1	0.392354	1.89349
Tjp1	6	1	0.642154	1.89132
Tm9sf3	6	1	1.00677	1.58957
Tra2a	6	1	0.585991	1.63958
Trip6	6	1	0.57603	1.72245
Tshz2	6	1	0.541623	1.68834
Ubr5	6	1	0.793824	2.31678
Ucp2	6	1	1.11533	1.83685
Usp34	6	1	0.85675	1.71334
Vps4b	6	1	0.26741	2.25177
Wapl	6	1	0.52025	2.15243
Wwox	6	1	0.237003	2.04042
Zbtb20	6	1	0.464082	2.11031
Zfp638	6	1	0.812361	1.54733
Zmiz1	6	1	0.335987	1.89418
Abhd14b	7	1	0.709646	-0.386354
Actn4	7	1	0.0542747	0.43408
Actr3	7	1	-0.402007	-0.485896
Akr1b3	7	1	0.123385	-0.204459
Anapc16	7	1	0.0753971	-0.0983141
Arf1	7	1	0.200009	0.105899
Arf4	7	1	-0.261057	-0.317743
Arid5b	7	1	0.475806	-0.220045
Atxn7	7	1	0.432958	-0.295918
Bin3	7	1	0.108859	-0.0114634
Cacybp	7	1	0.306654	-0.125718
Cdh2	7	1	0.153507	0.0294987
Cep63	7	1	0.00457109	0.0935957
Cfl1	7	1	0.452456	-0.373099
Chmp3	7	1	0.605388	-0.0875472
Chmp4b	7	1	-0.166146	-0.0163601
Csde1	7	1	0.236747	0.27888
D1Ertd622e	7	1	0.102464	0.179815
Ddrgk1	7	1	0.537485	-0.260414
Ddx49	7	1	0.107548	-0.069999
Ddx50	7	1	0.397851	-0.0911883
Dhodh	7	1	0.375039	-0.144444
Dusp11	7	1	0.0515446	0.209743
Eif1b	7	1	-0.250824	-0.00196311
Eif3c	7	1	0.29792	-0.00988886
Fam63a	7	1	0.0658845	0.376535
Fam98b	7	1	0.55874	-0.040783
Fgd5	7	1	0.264894	0.326561
Fkbp14	7	1	0.29652	-0.243809
Galnt18	7	1	-0.283041	-0.352136
Gm16576	7	1	-0.370297	0.0655135
Gm29609	7	1	0.0415943	0.0427302
Gnai2	7	1	0.471678	-0.302008
Grina	7	1	0.337576	0.201173
Gtf2b	7	1	0.171156	-0.0706795
Hax1	7	1	0.640772	-0.398472
Hdgf	7	1	0.155478	0.271392
Hn1	7	1	-0.535466	-0.421162
Ier2	7	1	-0.457798	-0.625853
Ints1	7	1	-0.0340369	0.141295
Kif5b	7	1	-0.151002	0.0543479
Lap3	7	1	0.0191723	0.392906
Laptm4b	7	1	0.284745	0.413841
Mblac1	7	1	0.535399	-0.321537
Mcfd2	7	1	0.260821	0.339021
Mif4gd	7	1	-0.379421	-0.286621
Mrpl43	7	1	-0.219482	0.0590545
Mtmr10	7	1	0.302688	0.283897
Ncbp2	7	1	0.650595	-0.248159
Nhp2l1	7	1	0.655156	-0.348632
Nol7	7	1	-0.129375	0.0710658
Npc2	7	1	0.653296	-0.232197
Paip2	7	1	-0.165402	-0.461189
Pigk	7	1	-0.0368345	0.264269
Pink1	7	1	0.23777	-0.0129562
Ppp1r21	7	1	-0.190818	-0.221723
Prr15l	7	1	-0.115273	-0.401925
Ptpn9	7	1	-0.0393896	-0.246933
Rdx	7	1	-0.206688	-0.0418272
Sars	7	1	0.408885	-0.0131049
Serbp1	7	1	-0.179384	0.0924427
Sfpq	7	1	0.0686399	0.393729
Smarce1	7	1	-0.361924	-0.20887
Snrpd1	7	1	0.467311	-0.234582
Snx1	7	1	0.276413	-0.229526
Spata6	7	1	0.047645	-0.194247
Spop	7	1	-0.0917078	0.119334
St3gal6	7	1	-0.581137	-0.406221
Stx7	7	1	-0.19189	-0.216911
Surf1	7	1	0.586628	-0.181004
Tcp1	7	1	-0.306049	-0.174095
Them4	7	1	-0.124568	-0.0329965
Timm21	7	1	-0.150211	0.180241
Tor1aip1	7	1	0.331839	0.115789
Trappc6b	7	1	-0.327533	-0.101578
Trim28	7	1	0.303913	0.256845
Ube2e1	7	1	-0.2843	-0.456596
Ube2r2	7	1	0.202573	0.286429
Ubl3	7	1	0.14837	-0.0876845
Ubxn4	7	1	-0.0213039	0.26942
Usp25	7	1	0.246287	0.174566
Usp47	7	1	-0.203539	0.214809
Zfp277	7	1	0.199388	0.291916
Zfp62	7	1	-0.262007	-0.0508301
1810043H04Rik	8	1	1.46661	-1.87721
2410015M20Rik	8	1	1.61248	-1.93614
A430005L14Rik	8	1	1.57447	-1.37985
Apoa1bp	8	1	1.65671	-1.77614
Atox1	8	1	1.92065	-1.45618
Bcas2	8	1	1.50107	-1.23495
Carkd	8	1	1.1405	-1.65804
Cdc37	8	1	1.13822	-1.42072
Chmp2a	8	1	1.09148	-1.2191
Cnbp	8	1	1.29788	-1.30394
Cndp2	8	1	1.0757	-1.32671
Cox5a	8	1	1.5371	-1.9934
Cst3	8	1	1.24104	-1.82385
Cuta	8	1	1.4082	-1.17006
Cyp2d22	8	1	1.69554	-1.76364
Dctn3	8	1	1.18091	-1.48805
Dtd1	8	1	1.12509	-1.43258
Dtymk	8	1	1.4092	-1.58652
Echs1	8	1	1.78117	-1.75631
Elof1	8	1	1.49296	-1.93817
Emc7	8	1	1.12764	-1.74469
Eno1	8	1	1.66532	-1.52181
Etfb	8	1	1.45577	-1.8272
Gabarapl2	8	1	1.60382	-1.62263
Gadd45gip1	8	1	1.39516	-1.64366
Gm10685	8	1	1.18726	-1.48699
Gsta4	8	1	1.49778	-2.01974
Gstp1	8	1	0.985489	-1.6761
H2afv	8	1	1.23694	-1.39768
Ifitm2	8	1	1.27622	-1.67552
Jtb	8	1	1.18208	-1.43174
Kcnk1	8	1	1.45504	-1.50248
Lamtor3	8	1	1.49787	-1.15552
Lsm5	8	1	1.2912	-1.84812
Mdh2	8	1	1.31503	-1.63851
Morf4l1	8	1	1.52933	-1.2898
Mpp1	8	1	1.07893	-1.70587
Mrpl30	8	1	1.83638	-1.50507
Mrpl42	8	1	1.71499	-1.69077
Ndufb3	8	1	1.47852	-2.05987
Ndufb9	8	1	1.70572	-1.67899
Ndufs2	8	1	1.2221	-1.64384
Ndufs7	8	1	1.74448	-1.73381
Ola1	8	1	1.21372	-1.34016
Pdcd6	8	1	0.985682	-1.57267
Phpt1	8	1	1.63561	-1.71477
Pnkd	8	1	1.36834	-1.35925
Poldip2	8	1	1.3743	-1.8947
Ppp1ca	8	1	1.58559	-1.56686
Prdx6	8	1	1.63553	-1.45018
Prr13	8	1	1.4614	-1.145
Psenen	8	1	1.09805	-1.36455
Psma3	8	1	1.26008	-1.57024
Psmc5	8	1	1.1305	-1.81552
Rab18	8	1	1.85273	-1.39564
Rab25	8	1	1.69301	-1.69246
Scp2	8	1	1.21901	-1.61955
Sec11a	8	1	1.51721	-1.17152
Sh3bgrl	8	1	1.73356	-1.65563
Slc25a3	8	1	1.06058	-1.68293
Srpk2	8	1	1.45329	-1.56526
Ssr4	8	1	1.87092	-1.83992
Suclg1	8	1	1.62347	-1.44619
Sumo1	8	1	1.26921	-1.32128
Sumo2	8	1	1.16385	-1.2787
Tceal8	8	1	1.40478	-1.68377
Tceb1	8	1	0.975221	-1.5129
Tecr	8	1	1.69829	-1.71085
Tesc	8	1	1.85401	-1.7055
Tm2d1	8	1	1.71078	-1.36069
Tmed10	8	1	1.3783	-1.16347
Tmem147	8	1	1.52343	-1.93371
Tmem14c	8	1	1.56324	-1.78935
Tomm5	8	1	1.24304	-1.78325
Tpi1	8	1	1.36693	-1.95203
Tspan17	8	1	1.05058	-1.46374
Txndc9	8	1	1.43651	-1.38439
Vimp	8	1	1.83914	-1.79845
2200002D01Rik	9	1	-3.7359	1.32318
AA467197	9	1	-4.34135	1.84432
Ahcyl2	9	1	-4.49502	1.27833
Aoc1	9	1	-3.50469	1.55029
Barx2	9	1	-3.42303	1.4988
Bnipl	9	1	-3.75392	1.17366
C4bp	9	1	-3.77672	1.24955
Ccl28	9	1	-4.54906	1.50247
Cd44	9	1	-4.25126	1.47482
Crip1	9	1	-4.10601	1.61179
Cyp2s1	9	1	-4.03481	1.87331
Ddah1	9	1	-3.42578	1.51476
Dmbt1	9	1	-4.1896	1.60975
Duox2	9	1	-4.20704	1.52065
Duoxa2	9	1	-4.32613	1.30031
Elf3	9	1	-4.21218	1.42724
Eps8	9	1	-4.23895	1.51975
Fam167a	9	1	-3.43196	1.50127
Fcgbp	9	1	-4.14487	1.59405
Gbp8	9	1	-3.42762	1.49845
Gipc2	9	1	-3.83652	1.37761
Gm15848	9	1	-4.32003	1.47847
Gm15867	9	1	-3.6338	1.47293
Gsto1	9	1	-4.26707	1.51686
Ihh	9	1	-3.63649	1.85577
Ikbke	9	1	-3.15647	1.10032
Iyd	9	1	-3.8369	1.55838
Klf10	9	1	-3.55146	1.42081
Klf5	9	1	-3.88553	1.59828
Lama3	9	1	-3.59432	1.17133
Lgals4	9	1	-4.18276	1.63652
Lrrc26	9	1	-4.25745	1.65531
Msln	9	1	-3.96928	1.30668
Muc1	9	1	-4.19277	1.27261
Muc20	9	1	-4.19415	1.31605
Nckipsd	9	1	-3.63514	1.83766
Nr2f2	9	1	-3.89643	1.51288
Ntn1	9	1	-3.73289	1.18807
Oit1	9	1	-4.09485	1.57388
Onecut2	9	1	-4.22271	1.58525
Paqr5	9	1	-4.13429	1.86834
Parm1	9	1	-4.13272	1.61056
Pdzrn3	9	1	-3.78522	1.21533
Pglyrp1	9	1	-4.21514	1.54564
Pklr	9	1	-3.71089	1.22946
Plac8	9	1	-4.34386	1.5209
Plekhm1	9	1	-3.27225	1.48686
Plet1	9	1	-4.30833	1.35283
Prkca	9	1	-3.53576	1.45981
Prss35	9	1	-3.62014	1.82225
Ptpn12	9	1	-3.48451	1.44456
Pzp	9	1	-3.84049	1.27089
Runx1	9	1	-3.48006	1.49613
S100a14	9	1	-3.91208	1.91633
S100a6	9	1	-4.14337	1.56774
Serpinb1a	9	1	-4.10033	1.56015
Setbp1	9	1	-2.99946	1.48004
Sftpd	9	1	-4.29009	1.32697
Slc4a4	9	1	-3.75852	1.69888
Smpd3	9	1	-4.13386	1.68664
Smpdl3a	9	1	-3.50678	1.46466
Sord	9	1	-4.26138	1.91392
Spink4	9	1	-4.17158	1.69413
Sptssb	9	1	-4.10679	1.85946
Sult1c2	9	1	-4.28415	1.91667
Tcea3	9	1	-4.1705	1.79659
Tff2	9	1	-4.11557	1.47702
Tm4sf20	9	1	-4.32956	1.21421
Tmc5	9	1	-4.31374	1.21848
Tmem45b	9	1	-3.76437	1.23701
Tmem54	9	1	-3.804	1.2699
Tmprss4	9	1	-4.17767	1.6135
Tnfsf13os	9	1	-3.5949	1.8536
Tspan8	9	1	-4.20586	1.66316
Ugt2b34	9	1	-4.10854	1.62683
Wfdc2	9	1	-4.09314	1.46426
Xbp1	9	1	-4.01993	1.4944
0610009B22Rik	10	1	0.505722	-1.37295
2610001J05Rik	10	1	0.573592	-1.39694
Acaa2	10	1	0.603257	-1.57952
Adck5	10	1	0.42457	-1.36031
Aga	10	1	0.589809	-1.46509
Aimp1	10	1	0.495229	-1.13349
Anxa4	10	1	0.509089	-1.47313
Ap2s1	10	1	0.968202	-1.02171
Arl1	10	1	0.760395	-1.32872
Atraid	10	1	0.624187	-1.20761
Capns1	10	1	0.577418	-1.27989
Cdk4	10	1	0.892585	-1.3055
Cirbp	10	1	1.26214	-1.08352
Clu	10	1	0.580062	-0.960158
Cpne3	10	1	0.874543	-0.846064
Cpq	10	1	0.856427	-1.51931
Cracr2b	10	1	0.907483	-0.761251
Crb3	10	1	0.864903	-0.786073
Csnk2b	10	1	0.980566	-0.647149
Ctsz	10	1	1.04464	-0.701912
Ei24	10	1	0.778905	-1.00643
Eif3k	10	1	0.5086	-1.23976
Gdi2	10	1	0.445035	-1.13619
Gm16286	10	1	1.35672	-0.828014
Gmps	10	1	0.481801	-1.3312
H3f3a	10	1	0.911557	-1.12853
Hdac1	10	1	1.06827	-0.77227
Hnrnpc	10	1	1.12861	-1.15042
Iah1	10	1	1.02508	-0.920788
Ift88	10	1	0.707057	-0.794966
Lamtor5	10	1	0.736069	-1.42249
Lcmt1	10	1	0.603279	-1.18716
Magt1	10	1	0.848302	-0.752236
Marcksl1	10	1	0.66671	-0.88573
Mif	10	1	0.918722	-0.753772
Morf4l2	10	1	0.942623	-1.04856
Mydgf	10	1	1.39661	-0.906947
Ndfip2	10	1	1.01347	-0.94656
Ndufs3	10	1	1.37356	-0.9819
Nit2	10	1	1.27317	-0.794293
Nme1	10	1	1.06616	-1.05644
Nsmce4a	10	1	1.24916	-0.890979
Pin4	10	1	0.810653	-1.40023
Plbd2	10	1	0.765878	-1.08645
Polr2e	10	1	0.926833	-1.45133
Ppdpf	10	1	0.677631	-0.629224
Ppid	10	1	0.728272	-1.33199
Prpsap1	10	1	0.979705	-0.77974
Rab2a	10	1	0.589833	-1.34739
Rab5a	10	1	0.81911	-0.670117
Rad51ap1	10	1	1.21198	-0.653275
Rnf6	10	1	0.703534	-1.47422
Rpp25l	10	1	1.07973	-0.785256
Rtfdc1	10	1	0.711184	-1.3751
Sae1	10	1	0.611079	-1.1784
Sdhd	10	1	1.31906	-1.02728
Selk	10	1	1.17237	-0.995698
Sgf29	10	1	1.10478	-0.698129
Slc9a3r1	10	1	0.818514	-1.21149
Smarcb1	10	1	1.2542	-1.00872
Smu1	10	1	0.909356	-1.14739
Snrnp27	10	1	0.741788	-1.44229
Spcs1	10	1	0.698368	-1.43079
Sri	10	1	0.709989	-1.18724
Ssr3	10	1	0.734872	-0.657468
Stoml2	10	1	1.20168	-0.831517
Tax1bp1	10	1	0.953422	-1.06354
Tmbim6	10	1	1.02817	-0.987728
Tomm20	10	1	1.14421	-1.17415
Ube2d2a	10	1	1.20142	-0.9953
Ube2l3	10	1	0.442016	-1.45568
Ubl4a	10	1	0.548468	-1.2328
Ubxn1	10	1	1.254	-0.989567
Vti1b	10	1	0.748967	-1.14469
Wbp2	10	1	1.25447	-1.05902
Abhd2	11	1	-1.95178	-1.09742
Actb	11	1	-1.89666	-0.877906
Arpc1b	11	1	-1.78719	-1.37359
B2m	11	1	-2.164	-1.47549
Bre	11	1	-1.76544	-0.77095
Bst2	11	1	-2.06415	-1.54128
Catip	11	1	-2.16848	-1.13781
Ccdc116	11	1	-2.14378	-1.48957
Cd24a	11	1	-1.9174	-1.07127
Cyba	11	1	-1.92521	-1.26152
Eif4e2	11	1	-1.67409	-1.00159
Fabp5	11	1	-2.33801	-1.09905
Far2	11	1	-1.74454	-0.902031
Flnb	11	1	-1.95327	-0.647412
Gm4841	11	1	-2.01013	-1.5854
Gpx4	11	1	-1.48187	-0.959573
H2-D1	11	1	-2.13255	-1.41591
H2-K1	11	1	-2.20117	-1.344
H2-Q4	11	1	-2.204	-1.28314
H2-T22	11	1	-2.12742	-1.45455
H2-T23	11	1	-2.11444	-1.52863
Hebp2	11	1	-2.17126	-1.36449
Ifi27	11	1	-2.03799	-1.50697
Ifi44	11	1	-1.80199	-1.74843
Ifitm3	11	1	-2.10137	-1.46002
Ifngr2	11	1	-2.05712	-1.05657
Irf7	11	1	-1.91124	-1.66896
Isg15	11	1	-1.8786	-1.70648
Itgav	11	1	-2.12793	-1.0633
Krt19	11	1	-1.74134	-0.640927
Krt8	11	1	-1.74167	-0.808059
Mrpl38	11	1	-1.84117	-1.21429
mt-Atp6	11	1	-3.63212	-2.84501
mt-Atp8	11	1	-3.53689	-2.74401
mt-Co1	11	1	-3.59851	-2.81166
mt-Co2	11	1	-3.62238	-2.83508
mt-Co3	11	1	-3.61119	-2.82515
mt-Cytb	11	1	-3.62737	-2.84138
mt-Nd1	11	1	-3.61468	-2.82814
mt-Nd2	11	1	-3.59257	-2.80523
mt-Nd4	11	1	-3.60128	-2.8145
mt-Nd4l	11	1	-3.60175	-2.81406
mt-Nd5	11	1	-3.56717	-2.77541
Mt2	11	1	-1.84375	-0.921775
Nav1	11	1	-3.55871	-2.76219
Oasl2	11	1	-1.95835	-1.67127
Pglyrp4	11	1	-2.24086	-1.04908
Psmb8	11	1	-2.04848	-1.4182
Psmb9	11	1	-2.08972	-1.44543
Ptgds	11	1	-1.69003	-0.915357
Rgs5	11	1	-2.26534	-1.06094
Rhoc	11	1	-1.66838	-0.658507
Rtn4	11	1	-1.59781	-0.878104
Rtp4	11	1	-1.96455	-1.64864
Slc39a1	11	1	-1.91572	-1.03549
Snx10	11	1	-2.19972	-1.01242
Sparc	11	1	-1.84491	-0.684777
Spen	11	1	-1.60258	-0.773913
Stat1	11	1	-1.9397	-1.65562
Tagln2	11	1	-1.63376	-0.700871
Tbcb	11	1	-1.51212	-0.833439
Tmsb10	11	1	-1.79867	-0.698233
Tmsb4x	11	1	-1.68704	-0.871657
Tpm4	11	1	-1.86428	-0.783249
Trafd1	11	1	-2.09405	-1.37829
Trf	11	1	-1.74722	-1.41717
Trim47	11	1	-1.91074	-1.04237
Trp53	11	1	-2.02186	-0.75482
Tuba1a	11	1	-1.74816	-0.532147
Tubb4b	11	1	-1.5233	-0.770001
Vim	11	1	-1.66899	-0.844876
Wfdc18	11	1	-1.85824	-1.06972
2510002D24Rik	12	1	1.49636	-0.66126
2700046A07Rik	12	1	1.5374	-0.680613
Abt1	12	1	1.38647	0.0821578
Aes	12	1	1.68784	-0.445981
Ak3	12	1	1.70529	-0.289113
Anxa6	12	1	1.47033	-0.0813671
Arpc2	12	1	1.9793	-0.913502
Atg3	12	1	1.50358	-0.908068
Atp6v1d	12	1	1.8928	-0.166708
Bhlhb9	12	1	1.79759	-0.57055
Cbx1	12	1	1.95795	-0.561225
Cbx4	12	1	1.72807	0.221207
Cd3e	12	1	1.57658	0.121446
Cd59a	12	1	1.30641	-0.108109
Cib1	12	1	1.92753	-0.885384
Cnot7	12	1	1.52949	-0.22216
Crlf2	12	1	1.92801	-0.792689
Ctso	12	1	1.76329	0.247622
Cyp2j6	12	1	1.48939	-0.391221
Dhrs1	12	1	1.74875	-0.333306
Dnajb6	12	1	1.57189	-0.0257972
Dnajc7	12	1	1.49207	-0.860242
Eif5a	12	1	1.35247	-0.536898
Erp29	12	1	1.52949	-0.875167
Faap20	12	1	2.00399	-0.724315
Fam136a	12	1	1.57082	-0.852707
Fbxo41	12	1	1.93319	-0.459569
Gm17056	12	1	2.02268	-0.717669
Gnas	12	1	1.52451	-0.784241
Hacd3	12	1	1.58459	0.152079
Hpn	12	1	1.86582	-0.26536
Krt23	12	1	1.96855	-0.497254
Lsm4	12	1	2.01254	-0.888802
Map2k2	12	1	1.60579	-0.383399
Med21	12	1	1.62928	-0.893212
Mrpl10	12	1	1.48728	-0.699116
Mtg2	12	1	1.41405	-0.211332
Nono	12	1	1.367	0.0245142
Pam16	12	1	1.76549	-0.623809
Pdia3	12	1	1.60636	-0.36601
Pigt	12	1	1.97016	-0.499243
Polr1d	12	1	1.84305	-1.01308
Prkar1a	12	1	1.29069	0.192807
Pyroxd1	12	1	1.49973	0.0517434
Rcor3	12	1	1.5563	0.252344
Ropn1l	12	1	1.57054	0.213303
Rsu1	12	1	1.51544	-0.391143
Sdf4	12	1	1.77448	-0.805178
Sec11c	12	1	1.87996	-0.76947
Serp1	12	1	1.66559	-0.392468
Snrpb	12	1	2.01783	-0.517664
Snx3	12	1	1.93509	-0.775922
Spint1	12	1	2.04783	-0.519583
Srebf1	12	1	1.31782	-0.117622
Stard3	12	1	1.47825	-0.30983
Tax1bp3	12	1	1.88902	-0.56971
Tbc1d1	12	1	1.64144	0.103767
Tfam	12	1	1.43488	-0.989493
Timm44	12	1	1.58623	0.00736001
Tmco3	12	1	1.8998	-0.972833
Tmed3	12	1	1.79315	-0.568712
Tmed4	12	1	1.64478	-0.67951
Toporsos	12	1	1.82582	-0.909412
Tram1	12	1	1.53575	-0.517243
Tspan33	12	1	1.22339	-0.162054
Vapa	12	1	1.74175	-0.858948
Vdac1	12	1	1.20433	0.0819493
Ybx1	12	1	1.65436	-0.656849
Zdhhc9	12	1	1.50136	0.0392859
Zfand6	12	1	1.49707	-0.161748
Zfp952	12	1	1.29185	0.0870869
4932438A13Rik	13	1	0.316733	1.72858
Abhd17a	13	1	-0.251034	1.33423
Amotl1	13	1	-0.101403	1.90724
Angpt1	13	1	0.30437	1.68064
Arhgap24	13	1	-0.0990923	1.76431
Arhgap5	13	1	0.233701	1.65601
Brd3	13	1	0.0109606	1.27453
Cflar	13	1	0.151851	1.28814
Chd4	13	1	-0.123988	1.59292
Cnot6	13	1	-0.0765987	1.36848
Copa	13	1	-0.146206	2.09968
Dag1	13	1	0.0820808	1.58223
Diaph1	13	1	0.0568986	1.38361
Dync1i2	13	1	0.482195	1.68761
Dynll2	13	1	0.156619	1.59974
Ehmt2	13	1	-0.17062	1.70826
Ezh1	13	1	0.0902325	1.62929
Fgf1	13	1	0.494341	1.63187
Foxp1	13	1	-0.197009	1.58394
Gigyf2	13	1	0.175619	1.64372
Hdlbp	13	1	-0.0894907	1.31438
Hipk2	13	1	0.236393	1.59262
Ice1	13	1	-0.125131	1.18132
Iqgap1	13	1	-0.104078	1.17551
Irf6	13	1	-0.175116	1.1461
Jade1	13	1	0.344853	1.59692
Kpna4	13	1	0.0616371	1.31085
Lrrcc1	13	1	0.113243	1.66655
Malat1	13	1	0.0423618	1.91913
Map2k7	13	1	-0.10904	1.18838
Map3k1	13	1	-0.0665093	2.00108
Mbnl2	13	1	0.562568	1.71627
Mff	13	1	0.0961974	1.4103
Mob3b	13	1	-0.0140783	1.43093
Mtss1	13	1	0.060242	1.52713
Nudcd3	13	1	0.00506796	1.37426
Nudt4	13	1	0.0411074	1.34515
Pafah1b1	13	1	0.105287	1.31712
Paxbp1	13	1	-0.235512	1.89916
Peli1	13	1	0.24779	1.45667
Pkhd1	13	1	-0.155577	1.93242
Pnisr	13	1	0.137654	1.98255
Rbm26	13	1	-0.1063	1.66968
Rnpc3	13	1	-0.107899	1.78742
Rock2	13	1	0.00456035	1.21611
RP23-316J6.4	13	1	0.280989	1.85046
Set	13	1	0.0388894	1.10521
Slc5a1	13	1	0.12836	1.64365
Smim10l1	13	1	0.487198	1.70977
Son	13	1	-0.0260587	1.56702
Sptbn1	13	1	0.0651343	1.59114
Srrm2	13	1	-0.0817447	1.06312
Stx4a	13	1	-0.11697	1.22924
Tcf4	13	1	-0.0104151	2.04769
Thrap3	13	1	0.286708	1.6533
Tnks2	13	1	0.119854	1.71999
Tnrc6b	13	1	0.482503	1.589
Tpr	13	1	0.0655214	1.24635
Trim44	13	1	0.0142059	1.8315
Trmt1l	13	1	0.13762	1.62233
Trp53bp2	13	1	-0.0554146	1.85593
Uhrf2	13	1	0.352154	1.72835
Xiap	13	1	-0.0142063	1.95097
Xist	13	1	0.0799499	1.8672
Ywhaz	13	1	0.336632	1.74957
Zcchc11	13	1	0.200645	1.60816
Zfp24	13	1	0.29756	1.3806
Zfp609	13	1	-0.233477	1.84623
Zfp644	13	1	-0.10763	1.82887
Zfr	13	1	-0.132031	1.71969
Zswim6	13	1	-0.0384815	1.19899
1190002N15Rik	14	1	-1.44084	1.75342
1810041L15Rik	14	1	-2.19576	1.52209
4732440D04Rik	14	1	-1.92695	1.38436
AA986860	14	1	-2.18965	1.77192
Acer3	14	1	-1.74187	1.73338
Adam33	14	1	-2.09483	1.42793
Aldh1a1	14	1	-2.06903	1.57257
Anxa5	14	1	-1.81825	1.32473
Arl4a	14	1	-1.56861	2.03336
Baiap2	14	1	-2.10999	1.72698
Bgn	14	1	-1.9776	2.15411
Blnk	14	1	-1.40015	1.68681
Cd14	14	1	-2.10669	1.65496
Chst8	14	1	-2.15862	1.63987
Cp	14	1	-1.64515	2.13633
Crim1	14	1	-1.82551	1.33369
Cryab	14	1	-1.90304	1.83914
Csrp2	14	1	-1.92512	1.77301
Ctbp2	14	1	-2.13359	1.44156
Cttnbp2	14	1	-1.97253	1.8508
Cxcl12	14	1	-1.5365	1.85562
Dtna	14	1	-1.80054	1.80697
Erbb2	14	1	-1.91104	1.81621
Fis1	14	1	-1.83713	2.27028
Fmo3	14	1	-1.62638	2.16257
Fxyd3	14	1	-2.00297	1.83831
Gstm2	14	1	-1.7718	2.32567
Hhex	14	1	-1.25371	1.82745
Hivep2	14	1	-2.09226	1.63722
Icos	14	1	-1.6476	1.87816
Igf1	14	1	-2.04088	1.23725
Igfbp7	14	1	-2.07858	1.59508
Lpgat1	14	1	-2.38896	1.17977
Ltbp4	14	1	-2.26618	1.33461
Lurap1l	14	1	-1.80274	1.42195
Ly6e	14	1	-2.13307	1.45086
Mfap1a	14	1	-2.02583	1.41717
Mid1ip1	14	1	-1.82131	1.74506
Mpdz	14	1	-2.00752	1.57891
Ndrg1	14	1	-1.99507	1.50543
Nfatc4	14	1	-2.05519	1.3709
Palm3	14	1	-1.80006	1.6984
Pdgfd	14	1	-1.68504	1.54654
Pdzk1ip1	14	1	-1.90705	1.91462
Platr22	14	1	-1.79187	2.08063
Plekha6	14	1	-1.58253	1.69852
Plekha7	14	1	-2.09563	1.43669
Plscr2	14	1	-1.81599	1.88511
Pnrc1	14	1	-1.87039	1.85302
Prdx5	14	1	-1.84934	2.08102
Rbpms	14	1	-1.91381	1.36741
Rras2	14	1	-1.69256	1.95255
Scx	14	1	-2.053	1.29394
Sema3c	14	1	-2.07688	1.5017
Sfr1	14	1	-2.04368	1.46876
Sh2d4a	14	1	-2.06397	1.25404
Slc16a12	14	1	-2.23414	1.70166
Slc39a10	14	1	-2.59594	1.17048
Slc6a6	14	1	-1.90579	2.0367
Sod3	14	1	-1.73235	2.12079
Srp54b	14	1	-2.0368	1.52474
Syap1	14	1	-2.12832	1.60605
Syt7	14	1	-1.66423	1.82083
Timp3	14	1	-1.84006	1.50824
Tsc22d3	14	1	-2.22928	1.35865
Tuft1	14	1	-1.79461	1.39147
Txnip	14	1	-1.82238	2.32138
Uri1	14	1	-1.85271	1.25138
1700084E18Rik	15	1	1.02055	1.4198
9530077C05Rik	15	1	1.1015	0.600616
Abcg3	15	1	0.894462	1.41227
Acin1	15	1	0.797463	1.0863
Acsl3	15	1	1.29111	0.481091
Ank3	15	1	1.13561	1.22771
Ankib1	15	1	1.04786	1.13593
Arl14ep	15	1	1.15071	0.381825
Atf7ip	15	1	1.14625	0.98073
Brd1	15	1	1.1378	0.729757
Btbd3	15	1	0.921945	1.2101
Casc4	15	1	0.825597	1.01246
Casz1	15	1	0.957696	0.800093
Cc2d2a	15	1	1.02731	1.22523
Cited4	15	1	1.301	0.325634
Csnk1a1	15	1	0.928387	1.07069
Ctcf	15	1	1.01029	1.10997
Cys1	15	1	1.25996	0.706119
Ddx5	15	1	1.10954	0.221101
Dennd1b	15	1	1.17256	0.548455
Dnlz	15	1	1.08103	0.552118
Exoc3l2	15	1	1.18306	1.33359
Gm4285	15	1	1.00951	0.770817
Grhl1	15	1	1.21837	0.44286
Gsk3b	15	1	1.10006	0.896133
Gspt1	15	1	1.15299	1.48941
Havcr2	15	1	0.909465	0.992976
Hjurp	15	1	1.09748	1.03609
Klf15	15	1	1.00568	1.40883
Krit1	15	1	0.737384	0.884201
Lpp	15	1	1.04626	0.954635
Lrrc32	15	1	1.04358	0.551948
Lsm14a	15	1	0.808701	0.701259
Mbp	15	1	1.05577	0.869169
Meis1	15	1	1.05628	1.13305
Midn	15	1	1.02455	0.730471
Mtch2	15	1	1.10752	0.764134
Pak2	15	1	1.08907	1.15668
Plce1	15	1	0.972063	1.4673
Plpp2	15	1	1.22258	0.313369
Pola1	15	1	1.10416	1.08835
Ppp1r13b	15	1	0.887793	0.462994
Prpf38b	15	1	0.877956	0.714793
Purb	15	1	0.748667	0.874446
Rap2a	15	1	1.00047	0.919794
Rnf10	15	1	0.98442	0.806472
Rrbp1	15	1	1.0771	0.545408
Sdpr	15	1	1.0564	0.718523
Secisbp2	15	1	1.1782	0.560558
Sel1l	15	1	0.878248	0.467866
Serinc1	15	1	0.883964	0.949956
Siah2	15	1	1.18687	0.946107
Slc43a2	15	1	0.978873	0.965748
Sox5	15	1	0.893194	0.969096
Ssr1	15	1	0.84159	1.37196
Stard10	15	1	1.32861	0.53889
Suco	15	1	0.952458	0.437609
Tia1	15	1	1.14842	1.2604
Tm2d2	15	1	0.917443	0.61158
Tmem260	15	1	0.950427	0.377014
Tmem67	15	1	0.95959	0.267205
Tpcn2	15	1	1.13296	0.899073
Tspan3	15	1	0.870897	0.860578
Ubap2l	15	1	0.916661	1.22461
Ube3a	15	1	0.799811	1.08108
Veph1	15	1	1.0561	0.892966
Wasl	15	1	0.960432	1.29012
Acbd5	16	1	2.09995	0.389296
Angptl1	16	1	2.06822	0.45628
Ap2b1	16	1	1.38631	0.868074
Aqp5	16	1	2.16172	0.535687
Arl5a	16	1	1.88582	0.909404
Armcx3	16	1	2.16973	0.279477
Atp6v0e2	16	1	2.30058	0.336591
B230317F23Rik	16	1	2.14084	-0.0941437
Bche	16	1	1.87144	0.806128
Btg1	16	1	2.36342	0.434109
Cadm1	16	1	1.78654	0.588896
Calr4	16	1	2.00779	0.953976
Cdk12	16	1	1.75649	0.655532
Chd7	16	1	1.68304	0.323142
Chpt1	16	1	2.07055	0.51231
Clca3a2	16	1	1.98619	0.712264
Clptm1l	16	1	2.01093	0.508574
Csnk2a1	16	1	1.29065	0.869741
Dbt	16	1	1.52233	0.963553
Ddx3x	16	1	1.60813	0.633045
Dynlt3	16	1	2.15223	0.877218
Ehf	16	1	2.13965	0.537285
Epdr1	16	1	2.05402	-0.177097
Erich5	16	1	1.72325	0.868489
Erlec1	16	1	1.89999	0.491839
Fbxo31	16	1	2.05399	0.0453375
Frmd4b	16	1	1.65629	0.894006
Gatad2b	16	1	1.44531	0.938656
Gm17024	16	1	1.87111	0.879431
Gm9888	16	1	1.61355	0.420764
Gng11	16	1	2.19118	0.313009
Grcc10	16	1	2.0777	-0.15927
Grsf1	16	1	2.03246	0.678278
Hspb8	16	1	2.28225	0.0494812
Jup	16	1	2.22295	0.273355
Kif20a	16	1	1.62483	0.572932
Lefty1	16	1	2.32817	0.182473
Lgmn	16	1	2.35412	0.366395
Litaf	16	1	1.65782	0.393383
Lman2	16	1	1.47024	0.529727
Lppos	16	1	1.65146	0.620084
Nucks1	16	1	1.84449	0.430205
Pgap1	16	1	2.37431	0.406709
Pla2g12a	16	1	2.04693	0.227197
Polr2b	16	1	1.65659	0.79454
Ppp1cb	16	1	2.10552	-0.0025644
Prr22	16	1	2.08894	0.157151
Psap	16	1	1.58518	0.619589
Ptp4a3	16	1	2.34529	0.0640915
Ramp1	16	1	1.86982	0.298993
Rragc	16	1	2.23098	0.474412
Slc38a3	16	1	1.37983	0.703596
Smco4	16	1	1.89497	0.60421
Sort1	16	1	2.10697	0.54933
Tial1	16	1	1.65447	0.784863
Tm9sf4	16	1	2.17337	0.650377
Tmed7	16	1	2.13978	0.0783526
Trappc2l	16	1	2.03964	0.347596
Trib1	16	1	1.77463	0.772346
Tsn	16	1	2.31594	0.338986
Ttr	16	1	1.96776	0.456365
Ube2q2	16	1	1.86588	0.607741
Uck1	16	1	1.26	0.909766
Zhx1	16	1	1.486	0.805999
Znrf2	16	1	1.66162	0.764267
0610012G03Rik	17	1	2.35738	-1.31065
1110008F13Rik	17	1	2.13356	-1.48839
1190007I07Rik	17	1	1.69018	-1.08207
1300002E11Rik	17	1	2.10617	-1.06855
1810058I24Rik	17	1	2.32041	-1.43919
4930599N23Rik	17	1	2.45394	-1.60811
Adipor1	17	1	2.1405	-1.15885
Ahsa1	17	1	1.77124	-1.25451
Arl6	17	1	2.46697	-1.20278
Arpc3	17	1	2.03183	-1.42229
Atp5e	17	1	2.20037	-1.95217
Atp6v1e1	17	1	1.74901	-1.25338
BC031181	17	1	2.15869	-1.53801
Cdk2ap2	17	1	2.04487	-1.77777
Churc1	17	1	2.04408	-1.72389
Clec2d	17	1	1.89143	-1.15798
Clta	17	1	2.34571	-1.37172
Cmpk1	17	1	1.84518	-1.1277
Cystm1	17	1	2.26611	-1.13473
Edf1	17	1	2.29451	-1.70281
Eif1	17	1	2.27787	-1.21116
Eif4a2	17	1	2.67652	-1.62579
Fam213a	17	1	2.35141	-1.88658
Fkbp8	17	1	1.70443	-1.10317
Fth1	17	1	2.9957	-1.40095
Hist1h2bc	17	1	2.19556	-1.96257
Hmgn1	17	1	2.68169	-1.61623
Hras	17	1	2.07027	-1.11199
Jagn1	17	1	1.74819	-1.22004
Mien1	17	1	2.16626	-1.66191
Morn2	17	1	2.0323	-1.37724
Mrpl54	17	1	2.65689	-1.40069
Naca	17	1	2.53324	-1.25378
Ndufa7	17	1	2.37318	-1.46495
Ndufb10	17	1	1.97143	-1.12507
Ndufb4	17	1	2.16996	-1.62387
Ndufs8	17	1	2.04159	-1.28754
Nedd8	17	1	2.05644	-1.72608
Npm3	17	1	2.22677	-0.916834
Ntan1	17	1	1.92588	-1.26649
Nudt21	17	1	2.44943	-1.8692
Oaz1	17	1	2.13543	-1.38067
Oaz2	17	1	2.15711	-1.14675
Ost4	17	1	2.4334	-1.44934
Ostc	17	1	1.96523	-1.35661
Pcbd1	17	1	2.49	-1.61322
Pcbd2	17	1	2.18242	-1.62609
Pigyl	17	1	1.89987	-1.06962
Psma5	17	1	1.65395	-1.04371
Rnaseh2c	17	1	2.48657	-1.54604
Sdhc	17	1	2.25895	-1.4655
Sec61b	17	1	1.81664	-1.22177
Selm	17	1	2.0541	-1.76962
Slc50a1	17	1	2.06293	-1.51167
Smagp	17	1	2.20487	-1.2245
Smpd1	17	1	2.12436	-1.11683
Sys1	17	1	1.92368	-1.16859
Tbca	17	1	2.23824	-1.74392
Tmem234	17	1	2.29216	-1.28995
Uqcrq	17	1	2.30601	-1.69986
Akap13	18	1	-1.48741	0.577255
Bri3	18	1	-1.44309	0.48595
Brox	18	1	-1.19346	0.566386
Camk2n1	18	1	-1.86625	0.698937
Ccdc71l	18	1	-1.6989	0.605334
Ccdc84	18	1	-1.06463	0.305023
Cd2ap	18	1	-1.97218	0.554149
Cdc42ep5	18	1	-1.27539	0.221012
Cdv3	18	1	-0.989713	0.250772
Chmp2b	18	1	-1.53059	0.432006
Comt	18	1	-1.82212	0.582863
Crip2	18	1	-1.71081	0.51047
Ctxn1	18	1	-1.30409	0.419641
Cyr61	18	1	-1.64794	0.825782
Dctn1	18	1	-1.21747	0.474493
Ddit3	18	1	-1.54083	0.373701
Ddx58	18	1	-1.78581	0.717242
Dusp18	18	1	-1.5665	0.442174
Gar1	18	1	-1.5975	0.603614
Glis2	18	1	-1.57693	0.57459
Gm15912	18	1	-1.75532	0.587821
Gprc5c	18	1	-1.2936	0.1011
Gpx1	18	1	-1.24936	0.548839
Gtf3a	18	1	-1.44435	0.352154
Hcfc1r1	18	1	-1.57033	0.727922
Hspa1a	18	1	-1.96462	0.30224
Ier3ip1	18	1	-1.29385	0.230547
Ifrd1	18	1	-1.60326	0.432679
Ipcef1	18	1	-1.96818	0.342828
Jund	18	1	-1.79431	0.283595
Klf6	18	1	-1.67308	0.308567
Krt7	18	1	-2.03885	0.623717
Ktn1	18	1	-1.70722	0.328672
Lrrc58	18	1	-1.281	0.516114
Map4	18	1	-1.2441	0.323653
43892	18	1	-1.39481	0.197194
Mkrn2os	18	1	-1.17768	0.132145
Mllt4	18	1	-2.07036	0.377082
Mtmr7	18	1	-1.27443	0.304109
Myadm	18	1	-2.00057	0.365946
Myc	18	1	-1.38252	0.227125
Nfe2l2	18	1	-1.35707	0.391254
Nufip2	18	1	-1.46618	0.324014
Pawr	18	1	-1.79401	0.36307
Pcdh7	18	1	-1.20079	0.320527
Prmt2	18	1	-1.67744	0.465235
Ptprs	18	1	-1.91342	0.330333
Rassf3	18	1	-1.72384	0.510597
Rybp	18	1	-1.92304	0.676484
Serinc2	18	1	-1.49502	0.461099
Slc7a1	18	1	-1.34505	0.215651
Slco3a1	18	1	-1.88997	0.390643
Spint2	18	1	-1.96365	0.342468
Sppl2a	18	1	-2.04725	0.296694
Sptlc2	18	1	-1.75212	0.686588
Stmn1	18	1	-1.79198	0.495711
Tpm1	18	1	-1.77504	0.585652
Ube2d3	18	1	-1.37304	0.306462
Wnt4	18	1	-1.68297	0.549262
Axdnd1	19	1	3.7412	-2.40187
Btf3	19	1	3.66995	-2.69042
Fam84a	19	1	4.18645	-2.48365
Gm10073	19	1	4.22433	-2.54715
Gnb2l1	19	1	3.80296	-2.23803
Ndrg4	19	1	4.22133	-2.67429
Rpl11	19	1	4.06495	-2.60203
Rpl12	19	1	4.11697	-2.6387
Rpl13a	19	1	3.91231	-2.48285
Rpl14	19	1	3.7435	-2.38907
Rpl17	19	1	4.0018	-2.5217
Rpl19	19	1	3.80039	-2.40629
Rpl22	19	1	3.99488	-2.46675
Rpl22l1	19	1	3.90857	-2.42248
Rpl23	19	1	4.01551	-2.61659
Rpl23a	19	1	4.00746	-2.56965
Rpl24	19	1	3.96692	-2.45219
Rpl26	19	1	3.87318	-2.48012
Rpl27a	19	1	4.02607	-2.58424
Rpl28	19	1	4.07156	-2.60045
Rpl29	19	1	3.69768	-2.45966
Rpl30	19	1	3.71596	-2.36654
Rpl31	19	1	3.96419	-2.53213
Rpl32	19	1	4.0362	-2.58253
Rpl35	19	1	3.87287	-2.36663
Rpl35a	19	1	4.04585	-2.69867
Rpl36	19	1	4.09621	-2.60641
Rpl36a	19	1	4.05971	-2.69074
Rpl37	19	1	4.09252	-2.68646
Rpl37a	19	1	4.12203	-2.56364
Rpl38	19	1	4.0998	-2.5849
Rpl39	19	1	4.11269	-2.63768
Rpl6	19	1	3.9758	-2.56848
Rplp1	19	1	4.16355	-2.56692
Rplp2	19	1	4.08028	-2.55953
Rps11	19	1	4.03067	-2.66189
Rps12	19	1	4.19458	-2.7144
Rps12-ps3	19	1	4.06367	-2.65201
Rps15	19	1	3.9683	-2.50697
Rps15a	19	1	3.90473	-2.54528
Rps16	19	1	3.79558	-2.34181
Rps17	19	1	3.86467	-2.58607
Rps18	19	1	3.83329	-2.41443
Rps19	19	1	4.0446	-2.60957
Rps20	19	1	4.10394	-2.6218
Rps23	19	1	4.05399	-2.63144
Rps24	19	1	4.16854	-2.59183
Rps25	19	1	4.10506	-2.60629
Rps27	19	1	3.9119	-2.46826
Rps27a	19	1	3.88674	-2.43376
Rps28	19	1	4.15246	-2.6312
Rps29	19	1	4.1301	-2.61898
Rps8	19	1	3.76803	-2.30791
Tomm7	19	1	3.77314	-2.24816
Tpt1	19	1	4.11598	-2.58475
Uba52	19	1	3.85257	-2.43466
Use1	19	1	3.55867	-2.64146
4930573C15Rik	20	1	0.180179	-1.00958
Actn1	20	1	-0.126393	-0.748378
Cav2	20	1	0.0508208	-0.432097
Cct5	20	1	0.383151	-0.944308
Cnih4	20	1	0.410214	-0.696431
Dnttip1	20	1	0.372208	-0.546626
Eif2s2	20	1	0.377576	-0.957281
Eif3e	20	1	0.506785	-0.629046
Enpp4	20	1	0.40792	-0.89779
Fam134a	20	1	0.609117	-0.772323
Fermt2	20	1	-0.0721515	-0.686669
Gcsam	20	1	-0.0325326	-0.646953
Ginm1	20	1	0.451698	-0.642235
Glrx3	20	1	-0.0706035	-0.603153
Gtf2a2	20	1	0.282655	-1.01224
Hdac2	20	1	0.266641	-0.637861
Hsd17b10	20	1	0.0842195	-0.388483
Hsp90ab1	20	1	-0.274703	-0.748179
Klhdc2	20	1	0.00282471	-0.800237
L3hypdh	20	1	-0.0565944	-1.02352
Lsr	20	1	-0.134281	-0.793379
Maf1	20	1	0.542973	-1.03624
Mapre1	20	1	0.551155	-0.877059
Med19	20	1	0.159557	-0.67249
Mrpl13	20	1	0.449868	-0.471865
Mrpl15	20	1	-0.314697	-0.850632
Mrpl36	20	1	0.322138	-0.469223
Mst1r	20	1	0.310915	-1.0686
Pafah1b3	20	1	0.238132	-0.5981
Pepd	20	1	0.395932	-1.08318
Phb2	20	1	0.322039	-0.867448
Pkm	20	1	0.367601	-0.794755
Ppp1r12a	20	1	0.210949	-0.429253
Prpf31	20	1	0.125322	-0.826393
Psmc3	20	1	-0.0402292	-0.894701
Psmd12	20	1	-0.0693594	-0.737609
Rab14	20	1	0.324437	-0.894846
Rala	20	1	-0.11574	-0.841208
Ralb	20	1	0.0264866	-0.913047
Rbbp8	20	1	0.420983	-1.09408
Rpgrip1l	20	1	0.268595	-0.397813
Rsbn1l	20	1	-0.0838888	-0.866225
Sh3bgr	20	1	-0.0222204	-1.13315
Snta1	20	1	-0.167252	-0.911965
Srp72	20	1	0.272023	-0.696532
Ssbp4	20	1	0.107173	-0.859622
Tma7	20	1	0.22271	-0.346796
Trp53i13	20	1	0.379827	-0.688764
Ube2b	20	1	0.194293	-1.00426
Vamp8	20	1	0.254913	-0.624074
Wash1	20	1	0.355584	-0.489232
Wdr1	20	1	-0.016492	-0.412741
Wsb2	20	1	0.3173	-0.783338
Wwtr1	20	1	-0.286627	-0.636668
Zfand5	20	1	0.226907	-0.649258
Zfp622	20	1	0.398061	-0.555468
Adgrg6	21	1	-0.51979	1.60929
Ano6	21	1	-0.503482	1.72355
Arfgef1	21	1	-0.532458	1.623
Bicc1	21	1	-0.620041	1.76656
Cbx6	21	1	-0.352452	2.28294
Cgn	21	1	-0.815231	1.5992
Clrn1	21	1	-0.471308	2.04061
Cttnbp2nl	21	1	-0.791116	1.45029
Dnajc13	21	1	-0.831572	1.88663
Eif2ak2	21	1	-0.663331	1.9744
Elf2	21	1	-0.413042	1.75698
Ep300	21	1	-0.423019	2.25564
Etl4	21	1	-0.291937	2.1559
Fam26f	21	1	-0.305407	1.56178
Fam84b	21	1	-0.461521	2.17244
Fmo2	21	1	-0.689444	2.18797
Gm43653	21	1	-0.897845	1.79839
Hp1bp3	21	1	-0.478686	1.65923
Itgb6	21	1	-0.60398	2.05127
Kansl1	21	1	-0.931501	2.14096
Klf13	21	1	-0.590671	1.41111
Lamc2	21	1	-0.45064	2.12548
Map4k4	21	1	-0.498694	1.52715
Mgat4a	21	1	-0.490427	2.34489
Mxd4	21	1	-0.519768	1.64548
Myo18a	21	1	-0.510732	1.49602
Myof	21	1	-0.879703	1.61326
Nfat5	21	1	-0.971003	2.18583
Nfe2l1	21	1	-0.812462	1.82684
Nhsl1	21	1	-0.904585	1.65838
Nlgn3	21	1	-0.369761	2.07238
Odc1	21	1	-0.700613	1.83561
Omd	21	1	-0.534127	1.74139
Pbx1	21	1	-0.55518	1.84268
Ptprf	21	1	-0.392063	2.0858
Rassf9	21	1	-0.418296	2.21406
Scaf11	21	1	-0.547748	1.62984
Smc1a	21	1	-0.591694	1.61551
Snrk	21	1	-0.603368	1.78178
Sorbs2	21	1	-0.867253	1.60799
Sox4	21	1	-0.812315	1.67147
Srrm1	21	1	-0.578908	1.57858
Ssh1	21	1	-0.533524	2.0898
Tead1	21	1	-0.70414	1.96858
Tjp2	21	1	-0.305304	1.96869
Tlk2	21	1	-0.384375	1.64738
Tln1	21	1	-0.767774	2.0665
Tsc22d4	21	1	-0.413225	1.80132
Ube2m	21	1	-0.996115	1.86379
Ubr3	21	1	-0.78283	1.86283
Ybx3	21	1	-0.618631	1.964
Zcchc7	21	1	-0.663557	1.7196
Zfp106	21	1	-0.707942	1.4937
Zfp329	21	1	-0.90382	1.44479
Acbd3	22	1	-0.919258	0.695449
Apc	22	1	-0.486891	1.16352
Arhgap6	22	1	-0.357766	1.2953
Bzw1	22	1	-0.864351	1.07112
Cab39	22	1	-0.717744	1.26595
Casp12	22	1	-0.257693	1.48488
Cenpb	22	1	-0.36665	1.25392
Chd3	22	1	-0.704231	0.732903
Cops2	22	1	-1.01695	0.727761
Cpox	22	1	-0.796168	1.1136
Cttn	22	1	-1.02053	0.716011
Cuedc1	22	1	-0.470477	1.38096
Dcaf8	22	1	-0.287315	1.40761
Deptor	22	1	-0.555062	1.18175
Dstn	22	1	-1.2074	0.675293
E2f4	22	1	-0.623465	1.29268
Elf1	22	1	-0.737921	0.804105
Fam129a	22	1	-0.842357	0.870518
Farp1	22	1	-0.668723	1.05591
Fbxo33	22	1	-0.935351	0.781038
Fndc3a	22	1	-0.671679	1.2747
Gemin7	22	1	-0.717643	0.710922
Gm26564	22	1	-1.0594	0.913216
Gtf3c4	22	1	-0.827174	1.17818
Igf2r	22	1	-0.764792	1.2033
Il17rd	22	1	-0.581136	1.20782
Ino80d	22	1	-0.528031	1.08583
Irf2bpl	22	1	-0.224487	1.44101
Itgb5	22	1	-0.553491	1.09816
Klhdc8b	22	1	-1.12601	0.64855
Meis2	22	1	-0.583462	1.16756
Misp	22	1	-0.553619	1.17259
Myh9	22	1	-1.0207	0.811676
Nedd4	22	1	-0.798887	0.676273
Nr2c2	22	1	-0.266707	1.54993
Palmd	22	1	-0.922752	0.992305
Phtf1	22	1	-1.0046	1.03953
Plec	22	1	-1.27771	0.740371
Ppp4r2	22	1	-0.863248	0.83604
Ptp4a2	22	1	-1.16793	0.717292
Rbm39	22	1	-0.553586	0.930528
Rnf13	22	1	-0.718016	0.931037
Sptan1	22	1	-0.353871	1.46665
Taok1	22	1	-0.883472	1.30657
Tgif1	22	1	-0.819475	0.732514
Timp2	22	1	-1.23324	1.02933
Tmem238	22	1	-0.828163	0.853759
Tob1	22	1	-0.576841	1.13644
Tomm6os	22	1	-0.669803	1.09299
Trip11	22	1	-0.833659	0.958442
Uggt1	22	1	-0.565279	0.988482
Usp3	22	1	-0.344311	1.33771
Wnk1	22	1	-0.791902	0.85903
Zbtb7a	22	1	-0.974461	0.913052
A430105I19Rik	23	1	-1.56523	1.39832
Abcd3	23	1	-1.19324	1.66539
Ablim1	23	1	-1.19767	0.849394
Agrn	23	1	-1.26981	1.02613
Amotl2	23	1	-1.62758	1.3159
Apbb2	23	1	-1.32523	1.57038
Aqp1	23	1	-1.64269	1.33546
Baiap2l1	23	1	-1.63926	1.3233
Bloc1s6	23	1	-1.69418	1.09211
Cdc42ep2	23	1	-1.29111	1.66359
Cdkl2	23	1	-1.82347	0.874281
Chka	23	1	-0.988305	1.58867
Cldn11	23	1	-1.20021	1.51992
Cldnd1	23	1	-1.1304	1.44224
Col27a1	23	1	-1.29489	1.78709
Dsg2	23	1	-1.33789	1.45872
Edn1	23	1	-1.5725	1.23174
Eid1	23	1	-1.32532	1.2976
Eps8l2	23	1	-1.74236	1.11046
Fam107b	23	1	-0.910252	1.57819
Fam177a	23	1	-1.47511	1.38594
Filip1l	23	1	-1.49346	0.818318
Fnbp1l	23	1	-1.00757	1.28264
Foxn3	23	1	-1.53327	1.38383
Fstl1	23	1	-1.42895	0.900078
Gbp2b	23	1	-1.50894	1.44954
Gm15475	23	1	-1.66264	1.09737
Gm16136	23	1	-1.63818	1.25641
Grb10	23	1	-1.06384	1.50296
Hmbox1	23	1	-1.44275	1.00945
Iqsec1	23	1	-1.23741	1.65496
Itih5	23	1	-1.23701	1.72598
Kmt2a	23	1	-1.2017	1.22543
Ly6a	23	1	-1.58206	1.38161
Mal2	23	1	-1.44916	1.03731
Mecp2	23	1	-1.31157	0.800355
Melk	23	1	-1.30926	1.60888
Mmp15	23	1	-1.34804	1.06836
Myh10	23	1	-1.38968	0.802435
Myrf	23	1	-1.39187	1.26728
Nedd4l	23	1	-1.30767	0.713765
Nek7	23	1	-1.07055	1.68352
Ninl	23	1	-1.12463	1.39223
Ptgfr	23	1	-1.59445	1.38482
Rasgrp3	23	1	-1.57821	1.42902
Rela	23	1	-1.51689	0.909953
Thra	23	1	-1.20462	1.35543
Tmpo	23	1	-1.6837	1.07854
Wwp1	23	1	-1.18388	1.22189
Xkr6	23	1	-1.4103	1.45226
Zc2hc1a	23	1	-1.52383	1.11771
Zfp462	23	1	-1.34973	1.42109
Zfp800	23	1	-1.08918	1.18748
2210407C18Rik	24	1	-4.41015	2.49538
Abcg5	24	1	-4.93674	2.21255
Abhd11os	24	1	-4.95427	2.21115
Adgrg7	24	1	-4.3686	2.35347
Akr1b7	24	1	-4.4388	2.33747
B4galnt3	24	1	-4.08585	2.08018
Bace2	24	1	-4.72208	1.81159
Cldn2	24	1	-4.28137	2.24636
Ctse	24	1	-4.78313	1.9877
Cyp2c65	24	1	-4.38173	2.43352
Cyp3a13	24	1	-4.34251	2.42981
Dock5	24	1	-3.77519	2.06843
E130012A19Rik	24	1	-4.99928	2.24609
Ecm1	24	1	-4.72139	1.92294
Flrt3	24	1	-4.51227	1.86869
Gabrp	24	1	-4.58172	1.9119
Gal3st2	24	1	-4.60621	2.00002
Gata5	24	1	-4.88592	2.17845
Gfpt1	24	1	-4.22684	2.36649
Gm3336	24	1	-4.2956	2.42748
Gm43936	24	1	-4.32053	2.43229
Golm1	24	1	-4.19309	2.00252
Hmgcs2	24	1	-3.96434	2.43952
L2hgdh	24	1	-4.08589	2.35962
Lgals2	24	1	-4.23619	2.14025
Ly6d	24	1	-4.51898	2.13163
Mgat3	24	1	-4.28675	2.39906
Muc13	24	1	-4.99721	2.23263
Nlrp6	24	1	-4.93446	2.19143
Olfm4	24	1	-4.30256	2.42613
Phgr1	24	1	-4.30864	2.34467
Pilra	24	1	-4.97215	2.21381
Pip5k1b	24	1	-4.81301	1.92608
Pla2g2f	24	1	-4.59929	2.15114
Pllp	24	1	-4.27179	2.42619
Pls1	24	1	-4.30766	2.35284
RP23-474J16.2	24	1	-4.99722	2.20354
RP24-549B12.4	24	1	-4.12959	2.03135
S100b	24	1	-4.32039	2.10391
Serpinb5	24	1	-4.36952	2.1982
Slc10a2	24	1	-4.57183	2.21487
Slc24a3	24	1	-4.99092	2.21803
Slc9a4	24	1	-4.91865	2.19637
Ssh2	24	1	-4.50847	2.28169
Sult1b1	24	1	-4.36772	2.11663
Sult1d1	24	1	-4.16616	2.30879
Tff3	24	1	-4.28648	2.36702
Tspan1	24	1	-4.35705	2.45982
Wnt7a	24	1	-4.97407	2.20715
Xpnpep2	24	1	-4.96178	2.20536
Zfhx4	24	1	-4.21213	2.20332
1110008P14Rik	25	1	2.42849	-0.313552
2700060E02Rik	25	1	2.72166	-0.904542
Aamp	25	1	2.53432	-0.162212
Ap3d1	25	1	2.63759	-0.347952
Arpc5	25	1	2.6635	-0.913316
Atp5o	25	1	2.74099	-1.00345
Bag1	25	1	2.32866	-0.847149
Bloc1s1	25	1	2.59147	-1.16422
Brk1	25	1	2.43328	-0.548036
Cand1	25	1	2.23053	-0.593021
Cntn1	25	1	2.39175	-0.431779
Coa3	25	1	2.61402	-0.831236
Cox6a1	25	1	2.81442	-1.04324
Cox7b	25	1	2.75141	-1.01549
Cpe	25	1	2.42611	-0.484859
Cstb	25	1	2.62475	-0.939498
Ctsh	25	1	2.48359	-0.549366
Fam96a	25	1	2.93688	-1.28085
Ftl1	25	1	2.86573	-1.12683
G6pc3	25	1	2.44065	-0.18605
Gapdh	25	1	2.64438	-1.07932
Glrx5	25	1	2.47906	-0.755585
Mlf2	25	1	2.32783	-0.956773
Mrps21	25	1	2.45135	-1.15186
Myeov2	25	1	2.64243	-1.03245
Nxf1	25	1	2.78843	-1.07413
Pabpc1	25	1	3.26266	-0.903963
Pcdhb13	25	1	2.60613	-1.04186
Phf5a	25	1	2.76494	-1.22977
Plekhf2	25	1	2.60054	-0.795471
Rab8a	25	1	2.12206	-0.459858
Rac3	25	1	2.3314	-0.324036
Rcn1	25	1	2.16974	-0.548817
Rps26	25	1	2.89285	-1.14111
S100a16	25	1	2.71055	-0.530351
Serf2	25	1	2.61864	-1.05059
Smim7	25	1	2.69984	-1.08635
Srgap2	25	1	2.64981	-0.417423
Ssr2	25	1	2.4861	-0.284639
Tex261	25	1	2.18482	-0.395209
Timm9	25	1	2.33283	-0.700531
Tmcc2	25	1	2.44055	-0.37377
Tmem258	25	1	2.71316	-0.98994
Tnks	25	1	2.46044	-0.755238
Ttc32	25	1	2.55814	-0.845018
Ubl5	25	1	2.70845	-1.14692
Upf3a	25	1	2.13398	-0.383566
Zc3hc1	25	1	2.48922	-0.580707
Zdhhc15	25	1	2.33812	-0.71944
Zfos1	25	1	3.29528	-0.884292
Cox7a2l	26	1	3.21479	-1.97445
Eef1a1	26	1	3.36026	-2.10085
Eef1b2	26	1	3.45071	-2.08402
Eef1d	26	1	3.36524	-2.22163
Eef1g	26	1	3.42361	-2.00476
Eif3f	26	1	3.36966	-1.9697
Eif3h	26	1	3.48842	-2.14352
Fau	26	1	3.69513	-2.2266
Gltscr2	26	1	2.95747	-1.87734
Gm10076	26	1	3.17016	-1.96992
Gm8730	26	1	3.15909	-1.56668
Gm9493	26	1	3.55356	-2.24937
Gm9843	26	1	3.15947	-1.93259
Hnrnpa1	26	1	2.89354	-1.92994
Mpst	26	1	2.86801	-1.892
Mrfap1	26	1	3.25921	-1.97957
Npm1	26	1	3.55056	-2.169
Pfdn5	26	1	3.27916	-2.30964
Rpl10	26	1	3.37514	-2.18637
Rpl10-ps3	26	1	2.88509	-2.14313
Rpl10a	26	1	3.60144	-2.21069
Rpl13	26	1	3.31791	-1.6765
Rpl15	26	1	3.46929	-2.24075
Rpl18	26	1	3.65588	-2.3145
Rpl18a	26	1	3.56049	-1.93303
Rpl21	26	1	3.46555	-2.13422
Rpl27	26	1	3.25436	-1.62816
Rpl3	26	1	3.39736	-2.1811
Rpl34	26	1	3.69911	-2.30674
Rpl41	26	1	3.30156	-2.11803
Rpl5	26	1	3.54007	-2.3196
Rpl7	26	1	3.34492	-2.18405
Rpl7a	26	1	3.80503	-2.16713
Rpl8	26	1	3.42351	-2.16807
Rpl9	26	1	3.35033	-2.17204
Rpl9-ps6	26	1	3.53967	-2.27215
Rplp0	26	1	3.27216	-1.75961
Rps13	26	1	3.65686	-2.31484
Rps14	26	1	3.55969	-2.14097
Rps2	26	1	3.5815	-2.20912
Rps21	26	1	3.46565	-2.16396
Rps3	26	1	3.45488	-2.24868
Rps3a1	26	1	3.57504	-2.28918
Rps4x	26	1	3.4116	-2.14455
Rps5	26	1	3.46908	-2.11922
Rps6	26	1	3.60857	-2.20095
Rps7	26	1	3.39292	-2.1606
Rps9	26	1	3.4687	-2.22707
Rpsa	26	1	3.53192	-2.22527
Vash2	26	1	3.3436	-2.14676
Adgrg1	27	1	-2.01773	0.79542
Ahnak	27	1	-2.10606	0.707607
Anxa3	27	1	-2.25123	0.839087
Arpin	27	1	-2.39556	0.724074
Bcam	27	1	-2.34873	0.948429
Birc2	27	1	-2.15422	0.663891
Camsap1	27	1	-2.34319	0.47861
Ccnd2	27	1	-2.09018	0.989741
Cd151	27	1	-2.08624	0.92226
Cebpb	27	1	-2.53669	0.356671
Clic3	27	1	-2.24259	1.0599
Csf1	27	1	-2.1338	1.0634
Ddr1	27	1	-2.66173	0.53443
Dimt1	27	1	-2.60502	0.0910751
Dlgap4	27	1	-1.8651	1.04423
Efemp1	27	1	-2.0482	0.916238
Eif1a	27	1	-1.87075	0.912666
Eif4ebp1	27	1	-2.08033	0.441267
Erbb3	27	1	-2.34632	0.287295
Ets2	27	1	-2.17613	0.756567
Ezr	27	1	-2.00773	1.04929
Flrt2	27	1	-2.15956	0.947243
Foxj1	27	1	-2.37967	0.309992
Gjb3	27	1	-2.42271	0.700895
Hspb1	27	1	-2.17327	0.281507
Hspg2	27	1	-2.13311	0.512498
Il18r1	27	1	-2.67894	1.09402
Il6st	27	1	-2.14457	0.655237
Itga3	27	1	-2.29314	0.628603
Jag1	27	1	-2.10723	0.775423
Mfge8	27	1	-2.18293	0.787073
Mrpl33	27	1	-2.34472	0.403292
Mybpc2	27	1	-2.36488	0.55814
Nfe2l3	27	1	-1.85285	1.11132
Pdpn	27	1	-2.33201	0.0454378
Pxdn	27	1	-2.8232	0.660279
Rarg	27	1	-2.70042	0.787116
Sdc4	27	1	-1.99953	0.899518
Sephs2	27	1	-2.31611	0.344301
Shroom3	27	1	-2.10038	0.667717
Stbd1	27	1	-1.84649	0.925363
Tacc2	27	1	-2.12531	0.988415
Tgfb3	27	1	-1.93596	1.01037
Trpv4	27	1	-2.35948	0.577668
Tuba1b	27	1	-2.08948	0.896452
Usp16	27	1	-2.64586	0.444539
Vat1	27	1	-2.06258	1.04412
Vnn1	27	1	-2.47398	0.651733
Wsb1	27	1	-2.36401	0.535599
1110004F10Rik	28	1	-0.789573	-1.00522
Actg1	28	1	-1.41413	-0.533878
Aimp2	28	1	-0.603821	-0.81153
Akap9	28	1	-0.524991	-0.79607
Atf4	28	1	-1.13934	-0.387428
Atp6v0e	28	1	-0.826724	-0.434127
Calm1	28	1	-1.37445	-0.805764
Cldn6	28	1	-1.4625	-0.693216
Clic1	28	1	-1.1776	-0.607386
Creb5	28	1	-1.54132	-0.498762
Crybb1	28	1	-0.91121	-0.686742
Cxadr	28	1	-1.29666	-0.536712
Dusp1	28	1	-1.57916	-0.437035
Eif3a	28	1	-0.326889	-0.610555
Emp2	28	1	-1.44701	-0.576868
F3	28	1	-1.20939	-0.759916
Fdx1l	28	1	-1.14026	-0.770456
Gng5	28	1	-0.522226	-0.84762
Gps2	28	1	-0.620175	-0.735417
H2afz	28	1	-0.741534	-0.815692
Hnrnph3	28	1	-0.766777	-0.751702
Hsp90aa1	28	1	-1.42056	-0.76202
Jak1	28	1	-1.46147	-0.524368
Junb	28	1	-1.05443	-0.344613
Khdrbs1	28	1	-0.537503	-0.680866
Klhl25	28	1	-1.24541	-0.590057
Krt17	28	1	-0.855183	-0.708995
Lamp1	28	1	-0.943504	-0.775887
Map1lc3b	28	1	-0.763506	-0.736779
Nupr1	28	1	-1.09413	-0.661858
Pdcd7	28	1	-0.883695	-0.586695
Ptma	28	1	-1.16636	-0.474455
Rbm42	28	1	-1.59421	-0.349765
Ring1	28	1	-0.60655	-0.79039
Sap18	28	1	-0.617472	-0.921672
Serpinb6a	28	1	-1.07347	-0.761778
Sf1	28	1	-0.594222	-0.83492
Slc15a3	28	1	-0.733172	-0.63689
Tecpr2	28	1	-0.495679	-0.835219
Tinagl1	28	1	-1.38577	-0.839551
Tm4sf1	28	1	-1.02641	-0.600634
Tpd52	28	1	-1.50201	-0.53691
Tprgl	28	1	-1.49364	-0.456328
Tubb2a	28	1	-1.25486	-0.827559
Vamp5	28	1	-1.42907	-0.682371
Vps36	28	1	-0.657852	-0.781857
Yrdc	28	1	-1.28527	-0.882399
Zfp90	28	1	-0.881672	-0.641023
Zmat2	28	1	-0.426049	-0.684327
1810014B01Rik	29	1	-1.29291	-1.40959
9130221H12Rik	29	1	-1.45157	-1.95073
Adprh	29	1	-0.85703	-1.42568
Arhgap8	29	1	-0.891472	-1.12583
Arl6ip5	29	1	-1.13236	-1.19146
Arpc4	29	1	-1.12448	-1.60488
Bik	29	1	-0.900349	-1.125
Bivm	29	1	-1.3927	-1.97622
Cd63	29	1	-0.991545	-1.20779
Cdan1	29	1	-1.39731	-1.98165
Cers2	29	1	-0.693942	-1.3785
Cldn7	29	1	-1.20862	-1.13436
Dpysl5	29	1	-1.40065	-1.45367
Fam195a	29	1	-1.02541	-2.03675
Ifit1	29	1	-1.48654	-1.8682
Il6ra	29	1	-1.36584	-2.02812
Irf9	29	1	-1.4442	-1.85712
Itpripl1	29	1	-1.37802	-2.00963
Krt18	29	1	-1.30576	-0.995941
Lnx1	29	1	-1.33101	-1.97332
Man1a	29	1	-1.13794	-1.08871
Med11	29	1	-1.22213	-1.85166
Mgat4b	29	1	-1.09695	-1.81293
Mrps18c	29	1	-1.06729	-1.24426
[truncated: 499 more rows]

## Sheet: M30_C2vC4
				0	2	1	4		log10fc(2-4)
2610524H06Rik	30		2610524H06Rik	0.035395	0.0345845	0.013744	0.0256376		0.0089469
5330417C22Rik	30		5330417C22Rik	0.201567	0.174203	0.119004	0.095203		0.0789996
9130008F23Rik	30		9130008F23Rik	0.151841	0.120058	0.104194	0.105164		0.0148941
Adgrl3	30		Adgrl3	0.0341312	0.0149401	0.0108981	0.00412351		0.0108166
Alcam	30		Alcam	0.696075	0.707414	0.609898	0.562219		0.145196
Aplp2	30		Aplp2	0.643633	0.587548	0.522915	0.52759		0.0599578
Appbp2	30		Appbp2	0.108318	0.0914166	0.0776032	0.0705093		0.0209073
Atp11b	30		Atp11b	0.125861	0.089344	0.0737269	0.0850494		0.00429456
Atp1b1	30		Atp1b1	0.907675	0.90219	0.778863	0.719524		0.182666
Cat	30		Cat	0.360247	0.368124	0.26776	0.194479		0.173646
Cobl	30		Cobl	0.188569	0.134935	0.0893981	0.109655		0.0252809
Ctnnbip1	30		Ctnnbip1	0.0824066	0.05649	0.0374323	0.0482217		0.00826826
Daam1	30		Daam1	0.124472	0.0855344	0.0613763	0.132139		-0.0466043
Dcdc2a	30		Dcdc2a	0.748074	0.68219	0.621792	0.617941		0.0642491
Dtd2	30		Dtd2	0.075025	0.0638321	0.0501488	0.041628		0.0222041
Epha7	30		Epha7	0.0517352	0.0565331	0.0320418	0.0187302		0.0378029
Fam65a	30		Fam65a	0.0382819	0.0441593	0.0303443	0.0385577		0.00560169
Fasn	30		Fasn	0.0991061	0.0920266	0.0524623	0.0772457		0.0147809
Fstl4	30		Fstl4	0.0435292	0.0296849	0.0113457	0.0160185		0.0136664
Gpc6	30		Gpc6	0.0163983	0.00422486	0.00149095	0.00497004		-0.000745185
Gstm7	30		Gstm7	0.0761818	0.0659952	0.0434518	0.0220442		0.0439511
Kcnh5	30		Kcnh5	0.00353165	0.00289784	0.000481066	0		0.00289784
Lcorl	30		Lcorl	0.117114	0.094369	0.0489155	0.0584583		0.0359108
Lrrc16a	30		Lrrc16a	0.170198	0.15661	0.117659	0.0979966		0.0586139
Lrrc8d	30		Lrrc8d	0.100354	0.0794925	0.0552935	0.0586629		0.0208296
Lrrn1	30		Lrrn1	0.15521	0.153281	0.0889945	0.0662941		0.0869872
Mat2a	30		Mat2a	0.225072	0.171601	0.139223	0.17146		0.000140249
Msmo1	30		Msmo1	0.0960438	0.0697739	0.0525712	0.0485689		0.0212049
Nabp1	30		Nabp1	0.058646	0.0318836	0.0372005	0.02701		0.00487362
Nr5a2	30		Nr5a2	0.194752	0.172509	0.1207	0.107124		0.0653856
Pbld2	30		Pbld2	0.119963	0.103782	0.0740455	0.0268661		0.076916
Pigr	30		Pigr	0.480106	0.444727	0.283723	0.172899		0.271828
Pik3c2a	30		Pik3c2a	0.184343	0.187185	0.147806	0.183073		0.00411213
Prox1	30		Prox1	0.396769	0.381776	0.296577	0.19372		0.188056
Ptdss1	30		Ptdss1	0.10088	0.0811477	0.0620673	0.0507097		0.0304379
Rab11fip2	30		Rab11fip2	0.161008	0.139226	0.0907388	0.109249		0.0299769
Rbbp9	30		Rbbp9	0.0876856	0.0805186	0.0713656	0.0689213		0.0115973
Rtcb	30		Rtcb	0.155228	0.13705	0.134063	0.129753		0.00729673
Sema5a	30		Sema5a	0.247594	0.235098	0.147224	0.128131		0.106966
Sema6a	30		Sema6a	0.181474	0.157658	0.11512	0.131695		0.0259621
Slc28a3	30		Slc28a3	0.382764	0.360572	0.254321	0.155229		0.205343
Spg20	30		Spg20	0.110384	0.0804469	0.0602029	0.0509219		0.029525
Syne1	30		Syne1	0.0924044	0.0765634	0.0503921	0.0427691		0.0337943
Tcf7l2	30		Tcf7l2	0.165857	0.142693	0.125592	0.144597		-0.00190346
Trak2	30		Trak2	0.10445	0.0808229	0.052715	0.0582381		0.0225849
Trim33	30		Trim33	0.123965	0.113153	0.0544103	0.0742403		0.0389128
Try4	30		Try4	0.200821	0.18321	0.174592	0.128188		0.0550219
Utrn	30		Utrn	0.225752	0.202314	0.158708	0.162344		0.0399696

## Sheet: M4_C2vC1
				0	2	1	4		log10fc(2-1)
0610011F06Rik	4		0610011F06Rik	0.261734	0.252777	0.193873	0.214527		0.0589042
2310001H17Rik	4		2310001H17Rik	0.099348	0.0902488	0.0537078	0.0355079		0.0365409
3110079O15Rik	4		3110079O15Rik	0.133729	0.0984364	0.0201661	0.0113359		0.0782703
4931406C07Rik	4		4931406C07Rik	0.214755	0.161516	0.111801	0.0881065		0.0497149
A230001M10Rik	4		A230001M10Rik	0.0464446	0.0371878	0.0157868	0.0194789		0.021401
Adamts16	4		Adamts16	0.0973859	0.0714671	0.0552342	0.0260579		0.0162329
Adrb2	4		Adrb2	0.0563507	0.0436094	0.0149931	0.0147598		0.0286164
Aif1l	4		Aif1l	0.0404292	0.0272046	0.00793505	0.00889294		0.0192695
Aldh1b1	4		Aldh1b1	0.0452254	0.0259894	0	0.0035699		0.0259894
Aldh1l1	4		Aldh1l1	0.0598797	0.0612571	0.0280282	0.0159949		0.033229
Aldoc	4		Aldoc	0.308382	0.256459	0.0675956	0.0369241		0.188864
Ap3s1	4		Ap3s1	0.096355	0.0718622	0.0676068	0.079068		0.0042554
Apcs	4		Apcs	0.100186	0.0903559	0.072314	0.0389909		0.0180419
Apoc1	4		Apoc1	0.544763	0.55129	0.338752	0.23498		0.212538
Apoe	4		Apoe	1.80225	1.79831	1.53012	1.30029		0.268186
Atp1a1	4		Atp1a1	0.581057	0.574729	0.470902	0.386741		0.103828
Bzw2	4		Bzw2	0.0848353	0.0541453	0.036386	0.0547286		0.0177593
Cbs	4		Cbs	0.318149	0.277026	0.0836204	0.0389728		0.193406
Cda	4		Cda	0.0510987	0.0309551	0.00718951	0.0134267		0.0237656
Clec1a	4		Clec1a	0.0503545	0.0233037	0.00585362	0.00145715		0.0174501
Commd6	4		Commd6	0.191087	0.161863	0.125583	0.175254		0.03628
Creb3l1	4		Creb3l1	0.0925134	0.0930644	0.0693822	0.0386294		0.0236821
Crp	4		Crp	0.264609	0.209946	0.106973	0.111412		0.102973
Cyb561	4		Cyb561	0.156039	0.138005	0.101872	0.136599		0.0361322
Cyp2j5	4		Cyp2j5	0.0461582	0.0346428	0.0083754	0.00538266		0.0262674
Cyp4f15	4		Cyp4f15	0.0249536	0.0186587	0.00146838	0.00272329		0.0171903
Dbi	4		Dbi	1.39987	1.36501	1.30371	1.20721		0.0612999
Dclre1a	4		Dclre1a	0.153319	0.127881	0.0912939	0.0641527		0.0365866
Dcx	4		Dcx	0.0850032	0.0726873	0.0343441	0.0242032		0.0383432
Ddt	4		Ddt	0.303518	0.280582	0.214636	0.158059		0.0659456
Degs1	4		Degs1	0.563449	0.489648	0.352474	0.327077		0.137174
Ecscr	4		Ecscr	0.310312	0.263264	0.18144	0.132333		0.0818242
Eef2	4		Eef2	0.634497	0.631448	0.564904	0.573395		0.066544
Enho	4		Enho	0.00379502	0.00328052	0.00184901	0		0.00143151
Fads2	4		Fads2	0.0614726	0.0543033	0.0189532	0.0166583		0.0353501
Fam65b	4		Fam65b	0.0668336	0.0375023	0.0110298	0.0038469		0.0264725
Fmo1	4		Fmo1	0.154389	0.115245	0.0526449	0.0475602		0.0625996
Gamt	4		Gamt	0.0870516	0.075769	0.0497582	0.0399412		0.0260108
Gas2	4		Gas2	0.100723	0.0858067	0.0240999	0.0301674		0.0617068
Gcsh	4		Gcsh	0.13062	0.0985243	0.0497799	0.0729694		0.0487443
Gm37350	4		Gm37350	0.149973	0.0955357	0.00891738	0.00259189		0.0866183
Gm5420	4		Gm5420	0.0569139	0.0544404	0.0128758	0.0093282		0.0415646
Gm5546	4		Gm5546	0.0286789	0.0173666	0.0054891	0.00534256		0.0118775
Gmnn	4		Gmnn	0.400425	0.287999	0.0564179	0.0493921		0.231581
Gpx2	4		Gpx2	0.198558	0.166267	0.0912076	0.10905		0.0750589
Gstt2	4		Gstt2	0.102313	0.0864248	0.0524785	0.039777		0.0339462
Gucy1a3	4		Gucy1a3	0.11615	0.0866549	0.0166568	0.0145994		0.0699981
Hacd1	4		Hacd1	0.137303	0.128195	0.0725149	0.0773686		0.0556798
Hilpda	4		Hilpda	0.218173	0.180607	0.107075	0.0430794		0.0735314
Homer2	4		Homer2	0.0715725	0.0414852	0.0332346	0.0423608		0.00825055
Hs6st2	4		Hs6st2	0.17462	0.105865	0.0100797	0.0269465		0.0957852
Hspa2	4		Hspa2	0.0579201	0.0309248	0.0189764	0.021931		0.0119484
Hspe1	4		Hspe1	0.414302	0.388461	0.356146	0.349584		0.0323152
Id2	4		Id2	0.468101	0.398291	0.307894	0.324422		0.0903968
Igfbpl1	4		Igfbpl1	0.0870737	0.0391355	0	0.00145715		0.0391355
Kcne3	4		Kcne3	0.340009	0.228907	0.079748	0.13525		0.149159
Kctd1	4		Kctd1	0.0848166	0.0658993	0.0460883	0.0530462		0.0198111
Lifr	4		Lifr	0.294592	0.230093	0.087651	0.0806534		0.142442
Lims1	4		Lims1	0.269339	0.196554	0.191647	0.166082		0.00490654
Lipt2	4		Lipt2	0.165543	0.106476	0.0851409	0.0784918		0.0213348
Lmcd1	4		Lmcd1	0.0567723	0.0202501	0.01514	0.0151645		0.00511005
Mdk	4		Mdk	0.0793974	0.0620901	0.0268433	0.0290065		0.0352468
Mia	4		Mia	0.188935	0.141628	0.0787033	0.0537196		0.0629249
Mmd2	4		Mmd2	0.191353	0.141451	0.0256237	0.00654661		0.115828
Myo1b	4		Myo1b	0.214988	0.168862	0.106268	0.117745		0.0625944
Ncald	4		Ncald	0.291253	0.243773	0.129869	0.0660968		0.113904
Ntrk2	4		Ntrk2	0.0796645	0.0558077	0.0116011	0.00827895		0.0442066
Nucb2	4		Nucb2	0.365423	0.302676	0.251883	0.264498		0.0507925
Nudt19	4		Nudt19	0.521245	0.421448	0.349364	0.38177		0.0720843
Oat	4		Oat	0.286468	0.245601	0.0712195	0.0451925		0.174381
Olfml2a	4		Olfml2a	0.0840542	0.0618376	0.00737665	0.0172985		0.054461
Pcyt1b	4		Pcyt1b	0.0507228	0.0412123	0.0174608	0.0227693		0.0237515
Pdcd4	4		Pdcd4	0.294037	0.280077	0.196474	0.241629		0.0836023
Pebp1	4		Pebp1	0.790588	0.725622	0.618649	0.584483		0.106973
Prox2os	4		Prox2os	0.00184038	0	0	0		0
Qsox1	4		Qsox1	0.280853	0.231171	0.159428	0.15147		0.0717424
Rgs2	4		Rgs2	0.279493	0.286037	0.218656	0.172923		0.0673804
Sbspon	4		Sbspon	0.214728	0.157779	0.140367	0.134803		0.0174129
Scd2	4		Scd2	0.397105	0.341251	0.202481	0.224261		0.13877
Sfrp4	4		Sfrp4	0.00224474	0	0	0		0
Sh3bgrl3	4		Sh3bgrl3	0.663244	0.636839	0.553252	0.541919		0.0835878
Shisa5	4		Shisa5	0.370269	0.339346	0.23882	0.325727		0.100527
Snhg18	4		Snhg18	0.631924	0.607824	0.450975	0.416508		0.156849
Spata18	4		Spata18	0.00226864	0	0	0		0
Spp1	4		Spp1	2.04463	1.98667	1.57609	1.38473		0.410583
Sptssa	4		Sptssa	0.432142	0.362421	0.332221	0.304516		0.0302004
Stard4	4		Stard4	0.0725861	0.0428875	0.0324146	0.02738		0.0104729
Stra6l	4		Stra6l	0.0791611	0.061094	0.0222509	0.0169065		0.0388431
Sult1a1	4		Sult1a1	0.379707	0.418584	0.237218	0.160218		0.181366
Taf15	4		Taf15	0.0633042	0.0385764	0.0479706	0.0777633		-0.00939422
Tbc1d4	4		Tbc1d4	0.148405	0.122506	0.0969467	0.0583663		0.0255592
Tmem237	4		Tmem237	0.0534374	0.038141	0.0238543	0.0506755		0.0142867
Tmem97	4		Tmem97	0.0721672	0.0534557	0.0321627	0.0364527		0.0212929
Traf4	4		Traf4	0.0582137	0.0481505	0.0227656	0.0291334		0.025385
Tspan7	4		Tspan7	0.190413	0.188059	0.12918	0.0980376		0.0588792
Tst	4		Tst	0.209146	0.181762	0.108914	0.0997574		0.0728477
Ttyh1	4		Ttyh1	0.0906412	0.0602909	0.032977	0.0152913		0.0273139
Ube2e3	4		Ube2e3	0.309076	0.272444	0.23817	0.218061		0.0342743
Ugt2b35	4		Ugt2b35	0.0685251	0.068573	0.0231078	0.0242461		0.0454652
Wfdc15b	4		Wfdc15b	0.430587	0.411331	0.374877	0.227358		0.0364538
Wfdc3	4		Wfdc3	0.323704	0.245481	0.0446938	0.0239175		0.200787

## Sheet: M33_C2vC1
				0	2	1	4		log10fc(2-1)
1700049E15Rik	33		1700049E15Rik	0.232257	0.160517	0.0263455	0.0234991		0.134172
Adamts1	33		Adamts1	0.432466	0.343987	0.0664938	0.0682704		0.277493
Adamts5	33		Adamts5	0.0736149	0.0612046	0.0183976	0.012472		0.042807
Adamts9	33		Adamts9	0.174595	0.149059	0.0647838	0.0636895		0.0842757
AI839979	33		AI839979	0.000953256	0	0	0		0
Arhgef38	33		Arhgef38	0.0605961	0.0450897	0.0335436	0.0511208		0.011546
C77370	33		C77370	0.069538	0.0458921	0.00295198	0.00379668		0.0429402
Cald1	33		Cald1	0.378695	0.3315	0.189487	0.200629		0.142013
Ccnd1	33		Ccnd1	0.872337	0.737892	0.215065	0.2896		0.522828
Ceacam20	33		Ceacam20	0.0926827	0.0820745	0.0219957	0.0100813		0.0600788
Cftr	33		Cftr	0.126611	0.0657435	0.0138238	0.030369		0.0519198
Clcn3	33		Clcn3	0.220173	0.190698	0.143969	0.19296		0.0467285
Cln3	33		Cln3	0.0707673	0.0692856	0.0397726	0.0719055		0.029513
Clps	33		Clps	0.420361	0.440528	0.371701	0.313081		0.0688273
Col18a1	33		Col18a1	0.155041	0.112183	0.0739424	0.0742878		0.0382403
Egflam	33		Egflam	0.0840543	0.0729798	0.0199298	0.0348		0.05305
Fads1	33		Fads1	0.146031	0.128602	0.053091	0.0409569		0.0755107
Fam101b	33		Fam101b	0.0534486	0.037739	0.0154479	0.0291877		0.0222911
Fam102a	33		Fam102a	0.0856125	0.0712322	0.0312686	0.0454978		0.0399636
Gm609	33		Gm609	0.157352	0.117702	0.0759857	0.0452182		0.0417167
Hes1	33		Hes1	0.59592	0.596429	0.323518	0.296171		0.272911
Hid1	33		Hid1	0.0425696	0.037902	0.019706	0.0287848		0.018196
Igf1r	33		Igf1r	0.209724	0.192322	0.134598	0.146399		0.0577238
Irf2	33		Irf2	0.190049	0.146013	0.0781022	0.140607		0.0679111
Kcnq1	33		Kcnq1	0.146328	0.137653	0.0539355	0.0655338		0.0837175
Lbh	33		Lbh	0.126158	0.0800826	0.0286638	0.0413312		0.0514188
Lig1	33		Lig1	0.104111	0.0713534	0.0516426	0.0487889		0.0197108
Map2	33		Map2	0.129229	0.0979129	0.0624826	0.0958492		0.0354304
Marcks	33		Marcks	0.364305	0.284078	0.201286	0.27649		0.0827926
Mcl1	33		Mcl1	0.337356	0.318089	0.23839	0.298096		0.0796989
Mical2	33		Mical2	0.0801617	0.0472288	0.0159177	0.0304662		0.0313111
Mme	33		Mme	0.234014	0.20898	0.0535162	0.0592187		0.155464
Mxra7	33		Mxra7	0.125507	0.100685	0.0605714	0.0667325		0.0401138
Nav2	33		Nav2	0.283133	0.24392	0.101284	0.113296		0.142636
Nrep	33		Nrep	0.107931	0.0835561	0.0393839	0.0440581		0.0441721
Osmr	33		Osmr	0.0609557	0.0479645	0.0198972	0.022139		0.0280673
Plxnb1	33		Plxnb1	0.149817	0.138784	0.0909169	0.119653		0.0478672
Prelp	33		Prelp	0.209502	0.147273	0.06211	0.0416171		0.0851629
Rcan2	33		Rcan2	0.0888964	0.0745661	0.0506394	0.0641472		0.0239267
Rhoj	33		Rhoj	0.248785	0.196279	0.114639	0.112302		0.0816403
Rhov	33		Rhov	0.184261	0.116298	0.0189308	0.0289269		0.0973673
Sfrp1	33		Sfrp1	0.0565176	0.035606	0.0223771	0.0278872		0.0132288
Socs2	33		Socs2	0.100422	0.0694417	0.0263115	0.0690092		0.0431302
Spon1	33		Spon1	0.167727	0.103665	0.01546	0.031381		0.0882049
Timp4	33		Timp4	0.0442024	0.0303852	0.0109634	0.0070463		0.0194218
Vsig10	33		Vsig10	0.189554	0.126805	0.0891412	0.0982144		0.0376637

## Sheet: M14_C1vC0
				0	2	1	4		log10fc(1-0)
1190002N15Rik	14		1190002N15Rik	0.0701368	0.0658388	0.100326	0.107244		0.0301891
1810041L15Rik	14		1810041L15Rik	0.000371996	0	0.00679609	0.01038		0.00642409
4732440D04Rik	14		4732440D04Rik	0.0149996	0.0190006	0.0325605	0.02623		0.0175609
AA986860	14		AA986860	0.0183001	0.0230358	0.0353608	0.0509506		0.0170607
Acer3	14		Acer3	0.0739325	0.0785127	0.122771	0.12002		0.0488382
Adam33	14		Adam33	0.159682	0.146417	0.330869	0.372331		0.171187
Aldh1a1	14		Aldh1a1	0.0533214	0.0437252	0.130731	0.15069		0.0774092
Anxa5	14		Anxa5	1.18441	1.14698	1.32589	1.24808		0.141471
Arl4a	14		Arl4a	0.0628697	0.0548972	0.0887502	0.111351		0.0258805
Baiap2	14		Baiap2	0.0448981	0.0448743	0.0758681	0.109442		0.0309699
Bgn	14		Bgn	0.0237458	0.0246289	0.0552314	0.0677581		0.0314856
Blnk	14		Blnk	0.0735632	0.074128	0.0894301	0.102356		0.0158669
Cd14	14		Cd14	0.0826087	0.0872792	0.172953	0.20898		0.0903439
Chst8	14		Chst8	0.0107483	0.00597373	0.0272655	0.0503677		0.0165172
Cp	14		Cp	0.70565	0.70645	0.934223	0.861227		0.228573
Crim1	14		Crim1	0.0387513	0.0329458	0.0635755	0.114464		0.0248242
Cryab	14		Cryab	0.399328	0.369955	0.421045	0.488181		0.021717
Csrp2	14		Csrp2	0.235406	0.238224	0.350665	0.377786		0.115259
Ctbp2	14		Ctbp2	0.0337561	0.030179	0.0410852	0.0679878		0.00732909
Cttnbp2	14		Cttnbp2	0.0497291	0.0332224	0.10618	0.136211		0.056451
Cxcl12	14		Cxcl12	0.127009	0.118769	0.173218	0.19143		0.0462093
Dtna	14		Dtna	0.0282782	0.0241705	0.0425635	0.0496972		0.0142853
Erbb2	14		Erbb2	0.0316827	0.0179324	0.0377294	0.0442849		0.00604672
Fis1	14		Fis1	0.405664	0.371345	0.404208	0.424735		-0.00145645
Fmo3	14		Fmo3	0	0	0.00255015	0		0.00255015
Fxyd3	14		Fxyd3	0.478321	0.527669	0.767514	0.801318		0.289192
Gstm2	14		Gstm2	0.0429048	0.0422406	0.0888352	0.0968564		0.0459304
Hhex	14		Hhex	0.440675	0.478329	0.492974	0.508993		0.0522989
Hivep2	14		Hivep2	0.0272608	0.0306103	0.0390971	0.0591377		0.0118363
Icos	14		Icos	0.000422754	0	0.00077757	0.00345718		0.000354816
Igf1	14		Igf1	0.0500256	0.0663653	0.163266	0.249283		0.11324
Igfbp7	14		Igfbp7	0.39062	0.375394	0.634985	0.70318		0.244365
Lpgat1	14		Lpgat1	0.044778	0.0371283	0.0594155	0.0985485		0.0146375
Ltbp4	14		Ltbp4	0.00876301	0.0111421	0.0390678	0.0729337		0.0303048
Lurap1l	14		Lurap1l	0.627869	0.586185	0.64398	0.649055		0.016111
Ly6e	14		Ly6e	0.82335	0.823654	0.939323	1.0036		0.115973
Mfap1a	14		Mfap1a	0.0495234	0.0456768	0.0581061	0.0726275		0.00858277
Mid1ip1	14		Mid1ip1	0.105255	0.0941295	0.154918	0.173804		0.0496623
Mpdz	14		Mpdz	0.0140019	0.012251	0.0331872	0.0446731		0.0191854
Ndrg1	14		Ndrg1	0.0160636	0.0121068	0.0677031	0.0805531		0.0516395
Nfatc4	14		Nfatc4	0.000490845	0	0.000873135	0.00198198		0.00038229
Palm3	14		Palm3	0	0	0.00162287	0.00415232		0.00162287
Pdgfd	14		Pdgfd	0.0991388	0.0931029	0.143797	0.135991		0.0446585
Pdzk1ip1	14		Pdzk1ip1	0.425625	0.428487	0.536966	0.560529		0.111341
Platr22	14		Platr22	0.0048102	0.00852462	0.0272796	0.0233676		0.0224694
Plekha6	14		Plekha6	0.0270095	0.0240752	0.0493349	0.0862253		0.0223254
Plekha7	14		Plekha7	0.0404772	0.0356823	0.0565817	0.075308		0.0161044
Plscr2	14		Plscr2	0.0406309	0.0469244	0.0829844	0.0887631		0.0423535
Pnrc1	14		Pnrc1	0.362436	0.354475	0.458247	0.465363		0.0958106
Prdx5	14		Prdx5	0.361166	0.351431	0.45445	0.470709		0.0932832
Rbpms	14		Rbpms	0.092786	0.0932627	0.118007	0.177828		0.0252211
Rras2	14		Rras2	0.0299787	0.0328257	0.0461139	0.0685878		0.0161352
Scx	14		Scx	0.0264689	0.0176858	0.0618902	0.109916		0.0354214
Sema3c	14		Sema3c	0.0927921	0.0921213	0.205158	0.314805		0.112365
Sfr1	14		Sfr1	0.172686	0.15924	0.178307	0.241859		0.00562068
Sh2d4a	14		Sh2d4a	0.12141	0.132272	0.209603	0.308993		0.0881932
Slc16a12	14		Slc16a12	0.00162494	0.00230848	0.00907271	0.0434682		0.00744777
Slc39a10	14		Slc39a10	0.0262782	0.0214177	0.0307812	0.0562637		0.00450304
Slc6a6	14		Slc6a6	0.139818	0.132142	0.238834	0.277701		0.0990167
Sod3	14		Sod3	0.00751367	0.0127106	0.0489431	0.0484722		0.0414294
Srp54b	14		Srp54b	0.146938	0.135595	0.134232	0.197831		-0.0127063
Syap1	14		Syap1	0.0665897	0.0604727	0.0810461	0.0966678		0.0144563
Syt7	14		Syt7	0.0230805	0.040164	0.0654639	0.0957417		0.0423834
Timp3	14		Timp3	0.254055	0.221343	0.443595	0.486085		0.18954
Tsc22d3	14		Tsc22d3	0.0776911	0.0715512	0.150476	0.233562		0.0727852
Tuft1	14		Tuft1	0.0214455	0.0207158	0.0617894	0.124623		0.0403439
Txnip	14		Txnip	0.272229	0.314919	0.415633	0.435923		0.143404
Uri1	14		Uri1	0.119406	0.101301	0.151048	0.195272		0.031642

## Sheet: M34_C1vC0
				0	2	1	4		log10fc(1-0)
1110017D15Rik	34		1110017D15Rik	0.00423581	0.00115768	0.0117822	0.0136292		0.00754643
Aadac	34		Aadac	0.0145306	0.0238589	0.0432769	0.0587567		0.0287463
Acot1	34		Acot1	0.0650003	0.0603881	0.0952338	0.0781299		0.0302335
B3gat3	34		B3gat3	0.0575059	0.0458336	0.0665576	0.0790942		0.00905168
Bmyc	34		Bmyc	0.338498	0.367435	0.4436	0.297193		0.105103
Cfap126	34		Cfap126	0.0337134	0.0176124	0.0423689	0.0608085		0.00865554
Cgnl1	34		Cgnl1	0.144643	0.143823	0.15678	0.173802		0.0121368
Cisd1	34		Cisd1	0.251956	0.225729	0.319222	0.253279		0.0672662
Ddit4l	34		Ddit4l	0.150217	0.159991	0.224419	0.177164		0.0742013
Dhrs3	34		Dhrs3	0.225009	0.222203	0.29392	0.239762		0.068911
Dnajb13	34		Dnajb13	0.00142255	0.00192926	0.0125397	0.00780476		0.0111171
Enkur	34		Enkur	0.0216582	0.0171389	0.0448124	0.0462532		0.0231541
Fgf12	34		Fgf12	0.0368538	0.0308764	0.0668554	0.0697314		0.0300016
Fgfr2	34		Fgfr2	0.180159	0.170064	0.193529	0.19833		0.0133702
Fgfr3	34		Fgfr3	0.278302	0.303041	0.330542	0.249056		0.0522402
Gas6	34		Gas6	0.665758	0.624098	0.747764	0.699888		0.0820054
Gm17344	34		Gm17344	0	0	0.000439224	0.00133264		0.000439224
Ildr2	34		Ildr2	0.0186048	0.0222157	0.0410833	0.0523846		0.0224786
Kifc3	34		Kifc3	0.358158	0.353415	0.477703	0.41051		0.119545
Lamc3	34		Lamc3	0.00817863	0.0123824	0.0322939	0.0165894		0.0241153
Lbp	34		Lbp	0.00737897	0.00499526	0.0356116	0.0396985		0.0282326
Mfap2	34		Mfap2	0	0.00059445	0.00204677	0		0.00204677
Mylk	34		Mylk	0.00819666	0.00589576	0.0432314	0.0314724		0.0350348
Nuak2	34		Nuak2	0.0145749	0.0120815	0.0391425	0.0335362		0.0245676
Nxnl2	34		Nxnl2	0	0	0.00169127	0		0.00169127
Osgin1	34		Osgin1	0.240618	0.232487	0.290751	0.253146		0.0501334
Pah	34		Pah	0.0215845	0.0497072	0.14008	0.14569		0.118496
Pde3b	34		Pde3b	0.0208407	0.0279793	0.0678903	0.0366635		0.0470495
Pdgfc	34		Pdgfc	0.11839	0.104075	0.181715	0.182082		0.0633254
Ppp1r1b	34		Ppp1r1b	0.198518	0.24745	0.396208	0.200226		0.19769
Rab27b	34		Rab27b	0.241198	0.235311	0.415311	0.335857		0.174113
Rnf32	34		Rnf32	0.00824058	0.0096959	0.0146895	0.0108495		0.00644897
Sertad3	34		Sertad3	0.022526	0.0196174	0.0369059	0.0247891		0.0143799
Shank2	34		Shank2	0.172301	0.175092	0.179603	0.165172		0.00730272
Slc22a4	34		Slc22a4	0.0165134	0.0162844	0.0355084	0.0299603		0.0189949
Smad3	34		Smad3	0.026262	0.0238842	0.0320887	0.0405104		0.00582665
Smim5	34		Smim5	0.0610856	0.0781206	0.14636	0.0710861		0.0852747
Spock3	34		Spock3	0.0291078	0.0236428	0.0447691	0.0408355		0.0156613
St3gal5	34		St3gal5	0.136582	0.114587	0.199707	0.164265		0.0631254
Syde2	34		Syde2	0.00959863	0.00655567	0.0181168	0.011533		0.00851818
Tnfrsf19	34		Tnfrsf19	0.1181	0.11328	0.138822	0.107589		0.0207225
Tns1	34		Tns1	0.263543	0.25951	0.462724	0.39636		0.199181
Vegfa	34		Vegfa	0.114863	0.102566	0.167201	0.143369		0.0523384
Vkorc1	34		Vkorc1	0.131445	0.110258	0.137534	0.127882		0.00608836
Wwc1	34		Wwc1	0.292311	0.289262	0.349475	0.360715		0.0571644

## Sheet: M3_C4vC2
				0	2	1	4		log10fc(4-2)
4933429H19Rik	3		4933429H19Rik	0.000692091	0	0	0.00193024		0.00193024
Aars	3		Aars	0.0696592	0.0550233	0.0549028	0.116411		0.0613882
Adgre5	3		Adgre5	0.0529082	0.0597507	0.0622598	0.0957021		0.0359514
Adgrv1	3		Adgrv1	0.00196503	0	0	0.00296686		0.00296686
Ankrd1	3		Ankrd1	0.173616	0.145623	0.142843	0.296384		0.150761
Anxa2	3		Anxa2	0.37648	0.316435	0.361633	0.556896		0.240461
Apobec3	3		Apobec3	0.165747	0.138189	0.165622	0.268977		0.130788
Arf6	3		Arf6	0.148161	0.139783	0.14138	0.158817		0.0190345
Atxn2	3		Atxn2	0.0487267	0.0418917	0.0463671	0.0441519		0.00226015
Bcl3	3		Bcl3	0.0232137	0.0137931	0.0197042	0.0703189		0.0565258
Bcl7c	3		Bcl7c	0.124346	0.0903949	0.0997539	0.168567		0.0781725
Birc3	3		Birc3	0.0245866	0.0198683	0.02053	0.0862101		0.0663418
Bok	3		Bok	0.0582112	0.0408078	0.0453403	0.102605		0.0617971
C3	3		C3	0.0278007	0.0131833	0.0440236	0.16641		0.153227
Cacul1	3		Cacul1	0.0510584	0.0341023	0.0530213	0.0583402		0.0242379
Casp4	3		Casp4	0.0175614	0.0117706	0.0106676	0.0540147		0.0422442
Ccl20	3		Ccl20	0.00261023	0.00135231	0	0.00452888		0.00317657
Cd47	3		Cd47	0.315728	0.260394	0.273325	0.451974		0.191581
Cdkn1a	3		Cdkn1a	0.0180038	0.0147048	0.0159373	0.0593304		0.0446256
Chac1	3		Chac1	0	0	0	0.00498865		0.00498865
Cldn4	3		Cldn4	0.0655375	0.0409296	0.0753625	0.167596		0.126667
Clic4	3		Clic4	0.0312921	0.0281361	0.0263987	0.0476304		0.0194943
Crybg3	3		Crybg3	0.0123856	0.00886078	0.0145859	0.0243661		0.0155054
Ctnna1	3		Ctnna1	0.311731	0.269528	0.323068	0.417623		0.148094
Cxcl16	3		Cxcl16	0.0672912	0.0476531	0.109149	0.300782		0.253129
Cyth2	3		Cyth2	0.100529	0.0827452	0.0936757	0.110744		0.0279985
D630011A20Rik	3		D630011A20Rik	0.0352029	0.0156356	0.016084	0.0680144		0.0523788
Ddah2	3		Ddah2	0.337276	0.322155	0.346572	0.435928		0.113773
Ddx21	3		Ddx21	0.0911622	0.0816067	0.0698595	0.133692		0.0520852
Dpy30	3		Dpy30	0.138123	0.0954219	0.124787	0.155205		0.0597835
Dynll1	3		Dynll1	0.248757	0.209047	0.234743	0.369315		0.160268
Efhd2	3		Efhd2	0.177403	0.163926	0.219824	0.328093		0.164167
Emc1	3		Emc1	0.0324475	0.0263529	0.0305141	0.0561183		0.0297654
Etf1	3		Etf1	0.0937455	0.064246	0.0808319	0.115264		0.0510183
F11r	3		F11r	0.259317	0.194293	0.255382	0.400092		0.205799
Fam49b	3		Fam49b	0.0447925	0.0351718	0.0493171	0.0540874		0.0189155
Fkbp1a	3		Fkbp1a	0.221048	0.195398	0.217966	0.274441		0.0790428
Flna	3		Flna	0.1585	0.116273	0.1477	0.210628		0.0943546
Fxyd6	3		Fxyd6	0.00896326	0.00501227	0.00400861	0.0260652		0.021053
Gadd45b	3		Gadd45b	0.0899089	0.0739907	0.0849514	0.16031		0.0863189
Glipr2	3		Glipr2	0.0309012	0.0230144	0.057072	0.103279		0.0802645
Gpm6b	3		Gpm6b	0.0673576	0.052956	0.0775823	0.120093		0.067137
H2afy	3		H2afy	0.171868	0.138164	0.156562	0.198275		0.0601111
Hecw2	3		Hecw2	0.000440153	0	0	0.0034868		0.0034868
Hnrnpab	3		Hnrnpab	0.257941	0.20439	0.229818	0.326891		0.122501
Htra2	3		Htra2	0.0259203	0.0348986	0.0271531	0.0514369		0.0165384
Icam1	3		Icam1	0.0110857	0.00647918	0.00924311	0.0497043		0.0432251
Ifngr1	3		Ifngr1	0.141377	0.092702	0.138518	0.229728		0.137026
Inppl1	3		Inppl1	0.0364905	0.023789	0.0358595	0.052118		0.028329
Iqub	3		Iqub	0.00147291	0.00228973	0.00494619	0.00956721		0.00727748
Lasp1	3		Lasp1	0.250643	0.236789	0.234382	0.316049		0.0792599
Lhfp	3		Lhfp	0.0240874	0.00993777	0.0194447	0.0535115		0.0435737
Lmna	3		Lmna	0.153309	0.118247	0.14164	0.233253		0.115006
Ltb	3		Ltb	0.0697689	0.0242001	0.0272392	0.0986243		0.0744243
Mlph	3		Mlph	0.059414	0.040096	0.0455789	0.110081		0.0699852
Myl12a	3		Myl12a	0.68691	0.61181	0.670545	0.871683		0.259873
Myl12b	3		Myl12b	0.434671	0.362599	0.380174	0.6121		0.249502
Neurl3	3		Neurl3	0.0390729	0.0271634	0.0315016	0.0854068		0.0582434
Nfkb2	3		Nfkb2	0.0339171	0.0199109	0.0272672	0.0851589		0.065248
Nfkbia	3		Nfkbia	0.185925	0.144739	0.197831	0.398529		0.25379
Nfkbie	3		Nfkbie	0.0140471	0.00813069	0.0106033	0.0644016		0.0562709
Nop14	3		Nop14	0.0595809	0.0511746	0.0569798	0.10098		0.0498056
Osbpl3	3		Osbpl3	0.215829	0.174566	0.178703	0.20179		0.0272237
Pak3	3		Pak3	0.0290635	0.0158461	0.0259841	0.0657626		0.0499166
Pam	3		Pam	0.0600416	0.0621708	0.0744443	0.115196		0.0530254
Pdlim4	3		Pdlim4	0.026791	0.0163344	0.0517977	0.113533		0.0971985
Plscr3	3		Plscr3	0.0915787	0.0801758	0.0818608	0.134339		0.0541636
Pmepa1	3		Pmepa1	0.0187676	0.0144914	0.0259649	0.0713271		0.0568357
Ppp1r14b	3		Ppp1r14b	0.122325	0.0866664	0.103271	0.131866		0.0451999
Ppp2r1a	3		Ppp2r1a	0.134618	0.130393	0.137376	0.166941		0.036548
Ptbp3	3		Ptbp3	0.142906	0.14952	0.131163	0.193905		0.0443853
Ptp4a1	3		Ptp4a1	0.396004	0.36893	0.372575	0.491295		0.122365
Pvrl2	3		Pvrl2	0.208284	0.1768	0.206932	0.261444		0.084644
Rabep1	3		Rabep1	0.096254	0.0912157	0.0888749	0.148011		0.0567955
Rasl10a	3		Rasl10a	0.0309061	0.0245849	0.0162082	0.0481206		0.0235357
Relb	3		Relb	0.0475467	0.0290419	0.0338534	0.117037		0.0879952
Rhob	3		Rhob	0.34845	0.322191	0.295202	0.389683		0.067492
Rras	3		Rras	0.109371	0.0746041	0.0775332	0.152279		0.0776752
S100a10	3		S100a10	0.464809	0.403131	0.470942	0.676236		0.273106
S100a11	3		S100a11	0.870179	0.845264	0.923785	1.06713		0.221871
Samd9l	3		Samd9l	0.142584	0.132103	0.194708	0.283732		0.151629
2020-09-07	3		2020-09-07	0.174922	0.146316	0.17919	0.257731		0.111415
Serpinb6b	3		Serpinb6b	0.0723831	0.0461524	0.0642988	0.0981486		0.0519962
Serpinb9	3		Serpinb9	0.066947	0.0529314	0.05138	0.101626		0.0486945
Sfn	3		Sfn	0.0357882	0.0256405	0.0424681	0.100123		0.0744826
Shisa4	3		Shisa4	0.0582963	0.0281385	0.0280175	0.138088		0.10995
Smek1	3		Smek1	0.0742366	0.0675875	0.0859969	0.108225		0.0406377
St14	3		St14	0.126424	0.129996	0.135917	0.146319		0.0163223
Stx11	3		Stx11	0.00147046	0.00162006	0.00100602	0.0212253		0.0196053
Tapbp	3		Tapbp	0.167268	0.128816	0.168837	0.248053		0.119237
Tgfb2	3		Tgfb2	0.281476	0.188835	0.192391	0.300698		0.111862
Tnfrsf12a	3		Tnfrsf12a	0.26509	0.226944	0.22984	0.34258		0.115636
Tnip1	3		Tnip1	0.0629124	0.0424425	0.0443363	0.101666		0.0592233
Trp53inp1	3		Trp53inp1	0.101026	0.0658659	0.060666	0.0890263		0.0231604
Ttc19	3		Ttc19	0.024393	0.0193464	0.0319972	0.0385076		0.0191611
Vars	3		Vars	0.0880412	0.0543911	0.0749969	0.0990964		0.0447053
Vcam1	3		Vcam1	0.00988985	0.00189641	0.00152224	0.0306903		0.0287939
Wasf2	3		Wasf2	0.147734	0.127708	0.141589	0.233176		0.105468
Ywhah	3		Ywhah	0.297202	0.261995	0.310442	0.399826		0.137831
Zc3h12d	3		Zc3h12d	0	0	0.00188064	0.00320033		0.00320033
Zfp36l1	3		Zfp36l1	0.45546	0.4195	0.43532	0.545139		0.125639
Zscan22	3		Zscan22	0.0129555	0.0115395	0.00680063	0.0234987		0.0119591

## Sheet: M18_C4vC2
				0	2	1	4		log10fc(4-2)
Akap13	18		Akap13	0.172321	0.13324	0.154346	0.252759		0.119519
Bri3	18		Bri3	0.325566	0.305987	0.367984	0.38765		0.0816634
Brox	18		Brox	0.0311746	0.0229323	0.0297923	0.054557		0.0316247
Camk2n1	18		Camk2n1	0.181269	0.172823	0.20073	0.31913		0.146306
Ccdc71l	18		Ccdc71l	0.0118634	0.0105483	0.0120723	0.0206251		0.0100768
Ccdc84	18		Ccdc84	0.00838391	0.00680775	0.0163324	0.0107737		0.00396598
Cd2ap	18		Cd2ap	0.37149	0.344626	0.40085	0.597988		0.253361
Cdc42ep5	18		Cdc42ep5	0.0796596	0.0597585	0.0818401	0.152633		0.0928745
Cdv3	18		Cdv3	0.117458	0.0897783	0.111935	0.172666		0.0828879
Chmp2b	18		Chmp2b	0.151533	0.102737	0.14753	0.250214		0.147477
Comt	18		Comt	0.22629	0.163513	0.226092	0.340357		0.176844
Crip2	18		Crip2	0.424117	0.355707	0.405737	0.482725		0.127018
Ctxn1	18		Ctxn1	0.0676962	0.0582173	0.0588232	0.109489		0.0512713
Cyr61	18		Cyr61	0.118339	0.064565	0.137967	0.270706		0.206141
Dctn1	18		Dctn1	0.0910585	0.095452	0.0940187	0.105217		0.00976475
Ddit3	18		Ddit3	0.0466883	0.0497776	0.0677222	0.072192		0.0224144
Ddx58	18		Ddx58	0.0465765	0.0412852	0.0483786	0.0836185		0.0423333
Dusp18	18		Dusp18	0.0139336	0.0116282	0.0140293	0.0371262		0.025498
Gar1	18		Gar1	0.083884	0.0600878	0.0886811	0.123975		0.0638875
Glis2	18		Glis2	0.0236964	0.0234905	0.0435806	0.0689464		0.0454559
Gm15912	18		Gm15912	0.00281982	0.00182725	0.00192963	0.00900918		0.00718194
Gprc5c	18		Gprc5c	0.0680276	0.0616367	0.0534929	0.108354		0.0467172
Gpx1	18		Gpx1	0.296652	0.269133	0.284524	0.359687		0.0905547
Gtf3a	18		Gtf3a	0.0594712	0.0436717	0.0594247	0.0991374		0.0554656
Hcfc1r1	18		Hcfc1r1	0.270639	0.282865	0.27362	0.350406		0.0675413
Hspa1a	18		Hspa1a	0.0118505	0.00593398	0.0166856	0.032094		0.0261601
Ier3ip1	18		Ier3ip1	0.152797	0.118453	0.142119	0.216065		0.0976117
Ifrd1	18		Ifrd1	0.102727	0.107566	0.0971042	0.176735		0.0691684
Ipcef1	18		Ipcef1	0.000419991	0.00169854	0.00414663	0.00194455		0.00024601
Jund	18		Jund	0.529086	0.468995	0.552045	0.760635		0.291639
Klf6	18		Klf6	0.293999	0.244144	0.302186	0.459183		0.215039
Krt7	18		Krt7	0.171956	0.134304	0.227012	0.357066		0.222761
Ktn1	18		Ktn1	0.230655	0.189991	0.230852	0.319827		0.129836
Lrrc58	18		Lrrc58	0.116383	0.105754	0.0952747	0.147504		0.0417494
Map4	18		Map4	0.118242	0.0993604	0.106936	0.132797		0.0334369
March2	18		March2	0.256651	0.216743	0.238902	0.22905		0.0123072
Mkrn2os	18		Mkrn2os	0.0747092	0.0535524	0.0484732	0.0791233		0.0255709
Mllt4	18		Mllt4	0.167672	0.151026	0.172586	0.239918		0.0888917
Mtmr7	18		Mtmr7	0.0090822	0.00738059	0.00978503	0.0142541		0.00687349
Myadm	18		Myadm	0.0995012	0.0760745	0.110494	0.188143		0.112068
Myc	18		Myc	0.0144831	0.0066572	0.0182764	0.0451603		0.0385031
Nfe2l2	18		Nfe2l2	0.240812	0.183775	0.222284	0.313762		0.129988
Nufip2	18		Nufip2	0.0782402	0.0716603	0.0943858	0.108856		0.0371961
Pawr	18		Pawr	0.0417746	0.020559	0.0373272	0.0824015		0.0618425
Pcdh7	18		Pcdh7	0.000917897	0	0	0		0
Prmt2	18		Prmt2	0.0350856	0.0340668	0.0360361	0.0561065		0.0220396
Ptprs	18		Ptprs	0.0367013	0.0258808	0.0318209	0.0617521		0.0358713
Rassf3	18		Rassf3	0.0931994	0.0819613	0.11571	0.19721		0.115249
Rybp	18		Rybp	0.0477043	0.0378861	0.0462042	0.0822309		0.0443448
Serinc2	18		Serinc2	0.084091	0.0761136	0.0589146	0.144988		0.0688741
Slc7a1	18		Slc7a1	0.0204091	0.0177643	0.0217205	0.0375136		0.0197493
Slco3a1	18		Slco3a1	0.178738	0.163961	0.162801	0.327715		0.163753
Spint2	18		Spint2	0.601808	0.564693	0.632945	0.698035		0.133342
Sppl2a	18		Sppl2a	0.15322	0.126491	0.136948	0.235171		0.10868
Sptlc2	18		Sptlc2	0.0988221	0.0706216	0.0874095	0.107238		0.0366168
Stmn1	18		Stmn1	0.173483	0.127708	0.200601	0.26171		0.134002
Tpm1	18		Tpm1	0.143432	0.112358	0.137036	0.239777		0.127418
Ube2d3	18		Ube2d3	0.333222	0.299995	0.298664	0.376014		0.0760193
Wnt4	18		Wnt4	0.14045	0.102736	0.164502	0.211574		0.108838

## Sheet: M27_C4vC0
				0	2	1	4		log10fc(4-0)
Adgrg1	27		Adgrg1	0.0581396	0.0550134	0.0707916	0.104916		0.0467762
Ahnak	27		Ahnak	0.252709	0.198608	0.279855	0.442046		0.189337
Anxa3	27		Anxa3	0.0234401	0.0146557	0.126631	0.473684		0.450243
Arpin	27		Arpin	0.0135689	0.00834938	0.0175929	0.0688042		0.0552353
Bcam	27		Bcam	0.131566	0.0904079	0.130246	0.26557		0.134004
Birc2	27		Birc2	0.0643006	0.0574299	0.0765956	0.128889		0.0645881
Camsap1	27		Camsap1	0.0290752	0.0340291	0.0183864	0.0446112		0.015536
Ccnd2	27		Ccnd2	0.0878462	0.0614269	0.10028	0.278543		0.190696
Cd151	27		Cd151	0.109388	0.0811059	0.106291	0.159308		0.04992
Cebpb	27		Cebpb	0.0284335	0.0306971	0.0541921	0.093136		0.0647025
Clic3	27		Clic3	0.000462931	0.00103955	0.0114447	0.0515097		0.0510467
Csf1	27		Csf1	0.00607635	0.00593038	0.0268198	0.0809989		0.0749226
Ddr1	27		Ddr1	0.0985269	0.0884901	0.10435	0.172001		0.0734744
Dimt1	27		Dimt1	0.0301213	0.0217501	0.0267894	0.0299082		-0.000213124
Dlgap4	27		Dlgap4	0.0716782	0.0573816	0.0628867	0.113077		0.0413986
Efemp1	27		Efemp1	0.0529993	0.0425153	0.0918021	0.149453		0.0964535
Eif1a	27		Eif1a	0.0921006	0.0801959	0.105423	0.161956		0.0698552
Eif4ebp1	27		Eif4ebp1	0.064518	0.0506919	0.0557834	0.0770737		0.0125556
Erbb3	27		Erbb3	0.0783524	0.0641932	0.0680198	0.105354		0.0270017
Ets2	27		Ets2	0.110652	0.0830433	0.102552	0.150334		0.0396822
Ezr	27		Ezr	0.188258	0.173044	0.251796	0.391352		0.203093
Flrt2	27		Flrt2	0.00863047	0.00639309	0.0537981	0.118322		0.109692
Foxj1	27		Foxj1	0.0141584	0.0136872	0.0445291	0.0953353		0.0811769
Gjb3	27		Gjb3	0	0	0	0.00579995		0.00579995
Hspb1	27		Hspb1	0.0926916	0.0586261	0.125419	0.189461		0.096769
Hspg2	27		Hspg2	0.0677401	0.0545569	0.0778085	0.185699		0.117959
Il18r1	27		Il18r1	0.000935075	0.000792774	0.00596967	0.0267124		0.0257773
Il6st	27		Il6st	0.0896154	0.0718889	0.106857	0.178639		0.0890237
Itga3	27		Itga3	0.023442	0.0225344	0.0396086	0.108268		0.0848265
Jag1	27		Jag1	0.0326163	0.0281857	0.0388729	0.0868662		0.05425
Mfge8	27		Mfge8	0.206171	0.140254	0.294263	0.561618		0.355446
Mrpl33	27		Mrpl33	0.296673	0.250557	0.294652	0.36536		0.0686863
Mybpc2	27		Mybpc2	0	0	0	0.0141553		0.0141553
Nfe2l3	27		Nfe2l3	0.0226193	0.0168336	0.0370603	0.0683632		0.0457439
Pdpn	27		Pdpn	0.0231047	0.0167426	0.0249707	0.0838094		0.0607047
Pxdn	27		Pxdn	0.0176485	0.00752146	0.00376624	0.0258801		0.00823154
Rarg	27		Rarg	0.0186225	0.0247034	0.0250631	0.0571544		0.0385319
Sdc4	27		Sdc4	0.358866	0.365708	0.424713	0.505122		0.146256
Sephs2	27		Sephs2	0.0481691	0.0606196	0.0781349	0.0874838		0.0393146
Shroom3	27		Shroom3	0.0820734	0.0754461	0.106929	0.167014		0.0849409
Stbd1	27		Stbd1	0.0545586	0.0526568	0.0890885	0.11057		0.0560114
Tacc2	27		Tacc2	0.0810638	0.0744333	0.159028	0.184203		0.103139
Tgfb3	27		Tgfb3	0.0406126	0.0351305	0.0873863	0.196788		0.156175
Trpv4	27		Trpv4	0.0160831	0.0144963	0.0237878	0.0570707		0.0409876
Tuba1b	27		Tuba1b	0.239799	0.216041	0.271719	0.338349		0.0985502
Usp16	27		Usp16	0.085551	0.0691891	0.0701834	0.113623		0.028072
Vat1	27		Vat1	0.0529693	0.0575376	0.0669892	0.126061		0.0730917
Vnn1	27		Vnn1	0.0127455	0.00433194	0.0144722	0.0639794		0.0512339
Wsb1	27		Wsb1	0.0666115	0.0694876	0.0887138	0.125608		0.0589961

[truncated: 2 more sheets: M19_C2vC0, M28_C0vC2]
