# Supplementary material for: Single-cell transcriptome analysis defines heterogeneity of the murine pancreatic ductal tree
Source: eLife. 2021 May 19;10:e67776. doi: 10.7554/eLife.67776 (PMC8184217; doi:10.7554/eLife.67776)
Supplement: Figure 6—source data 1. [file elife-67776-fig6-data1.xlsx]

## Sheet: HPDE SPP1 KO vs scr control
gene	log2FoldChange	padj
HOXD13	13.626	6.74862e-30
CADM1	13.1198	8.16832e-28
DACH1	12.5603	1.55826e-25
NEFM	12.4199	5.64419e-25
NRN1	12.2777	1.98053e-24
PRAME	12.2501	2.48296e-24
QPRT	12.227	1.15578e-23
CECR2	12.171	4.30753e-24
LRCH2	12.0588	1.24857e-23
LIN28B	12.03	1.54363e-23
NKX2-5	12.0076	1.88471e-23
CACNA1H	11.9776	3.45114e-23
WNT5A	11.9732	2.80734e-23
HOXD10	11.9714	2.84207e-23
HOXC4	11.8704	6.72891e-23
SALL1	11.8102	1.12776e-22
POU3F3	11.7201	2.70852e-22
NCAM1	11.695	9.551e-22
TENM1	11.5293	1.84124e-16
IGSF9B	11.5188	1.35375e-21
ZIC3	11.4913	1.94963e-21
EBF3	11.4818	1.75464e-21
GABRB3	11.4701	4.0038e-21
COLEC12	11.4589	3.60253e-21
UNC5C	11.2805	2.25796e-20
POU3F2	11.264	1.3579e-20
FLT1	11.2529	1.41389e-20
PURPL	11.2234	2.15939e-20
FOXP2	11.079	4.91229e-20
HOXB13	11.0361	7.6862e-20
HMX1	11.0327	7.85362e-20
LRRC3	11.0175	1.49753e-19
MAGEB2	10.9898	4.02254e-19
NRXN3	10.989	1.00266e-19
MSX2	10.8934	4.36406e-19
ZCCHC12	10.8838	2.04803e-19
ALX4	10.8524	3.56946e-19
PAX3	10.7527	1.33896e-18
LINC00632	10.6711	1.64679e-18
RADIL	10.6527	1.43453e-18
NAP1L3	10.6189	3.70588e-18
HOXD9	10.6026	2.17255e-18
GYG2	10.5777	2.96609e-18
PDE10A	10.564	2.46848e-18
LIN7A	10.5397	4.20036e-18
GDF7	10.507	4.83963e-18
LGR5	10.4849	6.30128e-18
TSSC2	10.4643	9.67893e-18
SELENBP1	10.4505	5.44507e-17
LINC01234	10.4266	9.29134e-18
ACSS3	10.4143	9.79044e-18
SOX2	10.4103	1.34562e-17
CAMKV	10.4042	1.14334e-17
INSM1	10.3792	2.7522e-17
ZNF521	10.3686	1.68276e-17
COL6A2	10.3575	7.02131e-17
WDR72	10.3144	2.70821e-17
DPYSL5	10.2529	3.73175e-44
HOXB8	10.2415	2.57102e-17
GPC6	10.2377	4.06794e-17
EMX2OS	10.2069	5.02317e-17
LINC01694	10.2023	1.25645e-12
SP8	10.1826	4.832e-17
LARGE1	10.1716	4.13448e-17
TSPEAR-AS2	10.1534	3.82694e-16
PDZRN3	10.1522	9.27084e-17
KCNJ8	10.1486	6.91614e-17
SOX8	10.1187	1.3984e-16
HOXD11	10.0952	1.21771e-16
CALCB	10.0909	8.85008e-16
GYPC	10.0488	1.44353e-16
FIRRE	10.0428	1.36705e-16
SOX21-AS1	9.98656	4.81493e-16
OLIG2	9.98419	5.64315e-16
MYOM2	9.96259	3.0107e-16
SLC35F1	9.95616	1.90984e-16
FOXD3	9.95122	5.0604e-16
RUNX1T1	9.9365	6.45752e-16
FAM110B	9.88243	4.79643e-16
LBX1-AS1	9.87047	6.50795e-16
HOXC8	9.86277	6.78518e-16
SHC2	9.86136	2.57718e-15
ASXL3	9.84869	1.1166e-15
ITGA8	9.8481	8.33801e-16
GPRIN3	9.83222	6.66677e-16
ADCYAP1R1	9.8247	3.78116e-15
RPRM	9.81883	8.15819e-16
PRUNE2	9.80337	1.26646e-15
ADRA2C	9.74059	1.4559e-15
ZIC2	9.74046	5.77942e-49
ALDH1A2	9.73843	3.58692e-58
GPM6A	9.72849	1.78528e-15
FMN2	9.72286	1.1746e-15
FAM133A	9.70289	2.97863e-08
FGF9	9.7003	2.69671e-15
PREX2	9.68053	2.31944e-15
TBX3	9.66166	1.50639e-38
FGF13	9.65942	3.94145e-09
KIF1A	9.65828	1.83308e-20
HOXD3	9.64775	3.80602e-15
BCHE	9.64749	4.32904e-15
CXCR4	9.64726	3.04364e-15
PTCHD1	9.63051	8.3131e-15
ALX1	9.62967	3.35887e-15
MAGEA6	9.62684	1.39008e-08
OSTN	9.61582	9.92074e-14
HLX	9.57716	6.63143e-15
PKNOX2	9.56358	3.66376e-15
FOXD3-AS1	9.55904	1.01598e-14
NAT8L	9.55495	5.68756e-47
EBF2	9.55335	1.07482e-14
TSHZ3	9.52584	4.80439e-15
CDH12	9.51806	9.65906e-15
GPR50	9.5011	2.57217e-14
CDX2	9.49971	7.25403e-29
HOTAIR	9.4924	7.63498e-15
HOXC10	9.49037	1.42616e-19
AMBN	9.46653	4.60162e-14
HOXD8	9.45021	1.06137e-14
KIAA1324L	9.41575	2.86615e-19
ADAMTS2	9.4138	2.91016e-14
CASC9	9.40882	1.72801e-14
NKX2-2	9.39083	2.57187e-14
NAP1L2	9.38326	2.18124e-14
HOXD4	9.36586	3.85683e-14
STUM	9.36318	2.04975e-13
ZNF536	9.36206	3.3374e-14
TRO	9.3606	2.85596e-27
PRRX1	9.35906	2.81666e-14
FOXF1	9.35336	2.18867e-13
EMX2	9.33288	2.52937e-14
EPHA7	9.32852	1.89607e-36
MKRN3	9.30669	6.86581e-14
COL25A1	9.30087	2.66991e-27
ADGRL3	9.29797	9.27107e-19
FAM189A1	9.2862	4.73199e-14
SLC47A1	9.28298	1.61182e-18
EPB41L3	9.28227	6.08611e-45
TSHZ2	9.2778	6.54205e-14
BARHL2	9.27758	4.94421e-14
IRF8	9.27369	8.54821e-14
NLGN1	9.25919	8.36995e-14
ZBTB16	9.25885	2.4736e-13
TCF24	9.25823	4.55989e-13
DNAH17-AS1	9.24619	1.19252e-13
LEF1	9.239	2.11237e-35
LHX2	9.21878	2.7859e-13
CUX2	9.20605	5.27568e-13
ROBO2	9.20404	4.15394e-14
DLX5	9.20286	6.76847e-14
DIRAS1	9.19985	7.69366e-27
COL6A1	9.17507	4.64311e-97
MEF2C	9.17355	2.27709e-18
KCNQ2	9.1713	3.13625e-18
AFF2	9.17068	1.29076e-09
SALL3	9.16472	1.10321e-12
BEND4	9.15303	1.24634e-26
MGAT3	9.14306	1.86493e-13
MAGEA3	9.1409	1.59497e-07
AMPH	9.12821	2.87627e-13
CA8	9.12445	8.21416e-42
MPPED2	9.1142	2.1107e-13
DAB1	9.11395	3.4043e-08
NKX3-2	9.11303	1.76826e-13
WT1	9.10679	7.50902e-14
MATK	9.09553	9.23346e-26
FENDRR	9.09142	1.15297e-12
LINC00491	9.09097	1.63445e-13
HOXB9	9.08199	1.12476e-108
EN1	9.07598	1.90546e-13
SLC7A3	9.05459	5.1017e-13
ST6GALNAC3	9.04524	1.34688e-13
ADGRB3	9.03011	3.44844e-13
KCNJ4	9.01421	4.3345e-12
PRSS30P	8.99848	2.47782e-13
NKX2-1	8.99258	1.58721e-12
RNF150	8.96896	1.33561e-25
HHIP	8.94139	6.66655e-13
FZD10-DT	8.93964	1.64271e-12
C19orf81	8.93625	4.54282e-13
LBX1	8.93438	4.45092e-13
SLITRK3	8.9194	7.62113e-13
SOX5	8.91922	1.41174e-12
RTN4RL1	8.90162	2.86358e-12
LINC01036	8.87216	2.7035e-12
CHRM3	8.86216	3.40167e-17
LRRC4B	8.85383	3.23485e-11
TMEM132E	8.85367	1.27703e-11
SPDYC	8.85154	6.11283e-12
TWIST1	8.83339	4.27246e-17
CTTNBP2	8.82434	7.15515e-13
ERC2	8.81532	9.32468e-13
BEX5	8.8101	2.56027e-12
DLX6-AS1	8.80654	1.16512e-12
POU6F2	8.79015	1.19765e-12
CXCL12	8.78911	6.72534e-12
BCRP2	8.78644	1.12487e-12
NEFL	8.77317	4.09192e-63
CHRDL1	8.76288	3.38264e-12
HOXA13	8.74941	2.00461e-24
GATA4	8.74416	3.86251e-32
SSTR2	8.74285	6.46106e-12
FOXN4	8.73613	3.98627e-12
ARMCX4	8.72899	1.91638e-12
ESRRG	8.71445	2.22989e-12
COL5A1	8.71051	1.20367e-22
PRDM16	8.70941	2.13877e-16
TBX20	8.69315	2.38839e-12
IQGAP2	8.6895	4.21433e-31
PPARGC1A	8.68544	2.54313e-12
SYT3	8.68134	5.70883e-12
ARHGDIG	8.64988	3.52622e-12
HEY2	8.64939	1.53111e-12
MAGEA10	8.6307	2.70331e-10
PDIA2	8.6257	3.24548e-12
TMEM178B	8.62075	2.86805e-16
LINC01980	8.59509	4.14004e-12
MAPK4	8.59164	5.30648e-12
LHX8	8.57204	6.36272e-12
RXRG	8.57051	6.84585e-12
PANTR1	8.5649	6.25255e-12
TMEM108	8.56195	6.64634e-12
LRP1B	8.56188	7.47352e-12
NELL2	8.54714	2.03296e-15
SEMA6A	8.52436	6.25921e-51
SPON1	8.51507	2.11686e-30
RAB3C	8.48161	1.91628e-11
TMEM200C	8.46907	1.60086e-11
SULT1C4	8.45934	2.04134e-11
DCLK1	8.45607	1.11666e-11
CRYGD	8.44936	1.13021e-11
SOX21	8.44704	1.16299e-11
CACNA1C	8.43205	7.80832e-11
MDGA2	8.42255	4.0449e-11
FLT4	8.42048	9.70474e-51
ADAMTS19	8.40729	7.43557e-12
ZBTB7C	8.39933	3.64702e-11
HAND2	8.38352	1.98119e-11
DPYSL4	8.38248	2.40808e-22
ELFN1	8.33991	1.17404e-09
EGFLAM	8.33628	3.08824e-11
LDLRAD4	8.3293	3.10625e-11
HOXC11	8.3267	3.81829e-29
SYN2	8.32487	1.55571e-11
IGDCC3	8.31462	4.03371e-15
LINC00982	8.31028	1.16562e-10
PDE3A	8.30952	8.25137e-11
SERTM1	8.29027	4.55937e-11
KLHL14	8.26858	7.85758e-11
PLPPR3	8.26532	6.32233e-11
FOXI3	8.23398	2.11904e-11
VSTM4	8.22789	5.70061e-11
EPHA8	8.22416	2.43928e-10
FREM2	8.19712	2.86204e-28
PCDH19	8.18049	2.47624e-10
PHYHD1	8.1794	1.38462e-14
ADAMTS10	8.16957	1.08097e-09
GUCY1B2	8.15183	7.48977e-11
PLCL2	8.15014	4.29386e-21
IGFBP5	8.13717	5.01117e-59
SYPL2	8.12824	1.95248e-14
CNTFR	8.12663	3.84971e-10
EMX1	8.09093	3.43815e-14
CLVS2	8.0869	4.93133e-10
SLCO1A2	8.08507	1.16335e-10
SLC30A10	8.0807	1.38324e-10
MAB21L1	8.07787	1.80676e-10
SCUBE1	8.0716	2.57229e-09
FZD10	8.06765	2.99969e-14
ABCB1	8.06607	1.99111e-26
UNC5A	8.06594	1.65874e-08
SHANK1	8.05255	6.50132e-09
PHACTR1	8.03894	1.5248e-08
HTR2C	8.02726	1.82317e-10
FHIT	8.02435	8.06705e-11
SP9	8.01929	2.3068e-20
PPP1R1A	8.00466	6.27864e-10
GFRA1	7.99794	1.43069e-13
DOK6	7.99473	3.13129e-10
RIMKLA	7.99364	4.86084e-14
MTMR7	7.98707	2.39195e-10
HOXC12	7.98576	8.99361e-10
LOC400464	7.98183	3.95792e-10
MGC12916	7.98156	2.80513e-10
CYP26A1	7.98071	3.42265e-10
HOXA6	7.96513	1.32755e-25
SULT4A1	7.95975	1.07694e-13
NOL4	7.95503	1.81012e-10
ZNF423	7.91817	3.06449e-10
ZDHHC22	7.91717	8.47756e-14
FABP6	7.9054	1.00923e-09
HFM1	7.90042	2.64478e-10
ZNF492	7.89988	4.06714e-10
PAX6-AS1	7.89153	1.05827e-09
COL19A1	7.89115	4.08294e-10
FTCD	7.89027	7.16678e-10
BCL6B	7.8871	1.12882e-13
SLC5A12	7.88253	6.24117e-10
HOXD-AS2	7.87079	4.41201e-10
LINC01854	7.8669	5.6034e-10
KCNQ4	7.86556	2.211e-10
MSI1	7.86238	9.31604e-56
SDC2	7.85965	5.09611e-92
GPC5	7.85068	3.4846e-09
SORCS1	7.84715	7.17981e-09
STAC2	7.84688	8.63124e-10
PI15	7.84599	1.97075e-09
IRX6	7.84495	1.05533e-08
LOC100505938	7.84467	8.5316e-10
MYO3A	7.83792	6.67385e-10
ADAM23	7.83375	8.15761e-32
LOC100506691	7.82889	1.74798e-19
NDNF	7.81977	9.49405e-13
GABRQ	7.81085	1.34172e-08
OTX2	7.79505	4.24341e-10
PCYT1B	7.79324	4.61255e-10
ANO5	7.78798	6.8106e-43
NPTX2	7.77824	2.85567e-23
UNCX	7.76721	3.83879e-18
HOXC6	7.76255	5.0433e-25
PRKG1	7.75508	2.62266e-30
ABCC8	7.73704	1.39945e-09
SNTB1	7.73677	6.70561e-19
SLC13A4	7.73314	4.87375e-10
LINC02495	7.73221	1.22749e-09
LINC01602	7.73089	6.69694e-05
ZNF572	7.7222	2.6648e-09
ABCB4	7.71199	4.21296e-09
VGLL2	7.70873	2.09605e-09
GSC	7.70525	1.60229e-09
TMEM100	7.6929	2.41471e-09
LINC00858	7.68588	2.46447e-09
TLX3	7.68424	3.72113e-09
ECEL1	7.68177	2.25537e-09
RGS7	7.67045	4.1244e-09
SHISA3	7.66968	9.67048e-10
PCBP3	7.66281	2.38064e-09
RYR2	7.65955	7.17262e-23
SYT9	7.65929	4.14999e-09
TAC1	7.65653	2.19145e-09
LINC01806	7.65084	1.88432e-09
RAB6C-AS1	7.6453	2.81851e-09
CXXC4	7.64397	9.13705e-13
GNG7	7.61787	3.86171e-29
MEGF11	7.61668	3.18081e-12
JAM3	7.61182	4.10135e-111
HAND1	7.59893	5.6369e-24
DMRT3	7.59778	1.18345e-08
TRPM6	7.59538	2.60161e-08
MSC-AS1	7.59088	3.65287e-09
ZIC5	7.58916	3.78188e-63
LINC01197	7.58866	3.78586e-09
CD19	7.57694	2.75972e-09
SMTNL2	7.57136	1.45674e-09
ZNF711	7.56377	5.47223e-84
TMEM59L	7.55967	5.48276e-07
PROK2	7.55829	4.76482e-09
TMEM132D-AS1	7.545	2.14372e-07
MSC	7.5433	5.42843e-09
TUBB4A	7.53595	2.99795e-53
GPR27	7.53427	3.14811e-40
BBOX1-AS1	7.53218	4.55872e-09
COL26A1	7.53152	2.78758e-09
LINC01876	7.53002	6.24048e-09
PNMA8A	7.52635	3.70125e-18
SERP2	7.49273	8.55408e-09
PURG	7.48968	2.18996e-09
KC6	7.48769	6.50793e-09
IGSF1	7.48716	9.48952e-09
DUSP15	7.46107	2.04666e-08
LRRTM4	7.45358	1.0354e-08
CPPED1	7.4529	4.36818e-09
RFPL2	7.44733	1.83423e-08
HOXC-AS3	7.43391	1.44109e-08
MKX	7.43375	5.76075e-22
EOMES	7.43365	3.19758e-09
RPRML	7.43276	6.38499e-09
CACNA1B	7.42644	9.15686e-09
LINC02381	7.42123	3.68722e-55
PALD1	7.41989	9.82899e-87
EBF1	7.40616	8.82232e-09
ADAMTS20	7.40249	3.99964e-09
GJB7	7.39415	4.5122e-09
SLC27A6	7.39195	7.80277e-09
PHOSPHO1	7.3793	3.13804e-08
KCNA2	7.35772	1.66697e-06
JAKMIP2	7.35431	7.93796e-09
NKX2-3	7.35387	1.52249e-08
LOC101928358	7.35003	1.18036e-26
RFX6	7.34899	5.54076e-08
CLSTN2	7.33338	1.6739e-07
RIPOR2	7.31753	1.02374e-06
ASNSP1	7.30847	3.72853e-08
NOVA2	7.30268	8.6207e-08
ZNF280B	7.29622	1.54334e-32
SOX3	7.29517	4.72113e-08
BRINP3	7.28439	1.92806e-08
DACH2	7.28172	2.65932e-08
ITGA9	7.2753	2.37999e-08
CRYM	7.2739	3.81494e-08
PLAC1	7.26802	3.85167e-16
TMEM163	7.26699	9.23541e-09
SDK1	7.26438	5.97091e-30
LOC100240735	7.25011	2.40725e-08
ITIH5	7.24586	2.74579e-07
LINC01399	7.24264	8.24041e-08
OLIG1	7.24036	6.9884e-08
USH1C	7.24008	2.14521e-08
CCDC89	7.22494	2.75017e-08
ENPEP	7.21849	1.00571e-08
GRID1	7.21774	4.51097e-16
PDE1B	7.2089	1.14454e-08
PDE3B	7.2087	2.87485e-75
NTS	7.20859	1.86857e-07
NRCAM	7.20496	3.19312e-39
MAGEA11	7.20231	2.28109e-06
CAND2	7.19637	2.4349e-31
SYT6	7.19172	9.77605e-07
TAL1	7.18578	4.2556e-08
CACNA2D2	7.17881	6.79421e-26
VAX2	7.17011	3.28755e-11
GREM2	7.16969	7.08218e-07
CD207	7.16424	3.4315e-08
DLX6	7.16284	2.50759e-16
CPS1	7.15879	5.47117e-62
ANKRD19P	7.15262	1.63187e-08
CITED1	7.15151	3.73718e-08
MAGEC1	7.14225	1.94703e-07
PLPP7	7.13459	7.9019e-08
ALDH1L2	7.12544	2.61111e-76
SNCAIP	7.12513	5.69678e-11
PRDM6	7.12264	1.92463e-44
KCTD19	7.12258	1.76817e-08
CLEC4F	7.11801	5.31057e-08
LINC02609	7.11427	4.17512e-16
USP44	7.11158	6.8722e-26
NEXMIF	7.10823	5.7658e-08
FEZF1-AS1	7.10513	7.04255e-08
NKX2-8	7.08988	1.04219e-07
KCNN2	7.08831	6.48684e-08
LOC105372028	7.08155	8.63992e-08
TRPA1	7.07628	7.04951e-08
LSAMP	7.07077	2.37402e-07
UTF1	7.06724	5.13284e-07
GLIS1	7.06339	7.81882e-08
KCND3	7.05769	6.09975e-07
ADAMTS9	7.04442	2.28497e-20
MSX1	7.04203	1.79983e-64
LINC00461	7.03819	6.95928e-08
INSYN1	7.03579	5.30784e-20
PLPPR4	7.03242	3.11867e-07
APCDD1	7.02955	5.33841e-08
LINC01508	7.02658	9.62048e-08
WT1-AS	7.02087	3.92497e-07
XCL1	7.0133	1.25063e-07
C8orf31	7.00661	4.92018e-07
LOC440934	6.99669	1.07821e-07
LOC100505588	6.99261	1.0898e-07
KCNQ1OT1	6.97603	2.50845e-22
JPH3	6.97172	4.18182e-21
AGTR1	6.96387	1.48718e-07
LOC101928307	6.96016	1.28863e-07
LEF1-AS1	6.95418	1.43625e-07
PROX1	6.95307	9.32103e-24
HHIP-AS1	6.95056	1.31232e-07
LOC105377372	6.94555	2.98405e-07
TMTC1	6.93019	1.31319e-49
LINGO1	6.92641	2.0714e-43
TSPAN11	6.92189	1.39628e-07
ALKAL1	6.90921	8.16933e-10
ZC3H12B	6.90134	5.20825e-08
LOC102724566	6.88551	7.76046e-15
SLC24A2	6.882	5.60566e-06
TESC	6.8698	6.34225e-10
NR3C2	6.86819	1.91946e-28
MAGEC2	6.86588	0.0106264
MEOX1	6.86175	5.38177e-07
LRRC9	6.85839	6.29427e-07
CBSL	6.85672	2.14087e-37
GLB1L3	6.85505	2.44043e-10
AARD	6.84999	4.22167e-07
MIR2052HG	6.83016	3.5173e-07
THSD7A	6.82774	2.47846e-07
KIT	6.82771	4.57942e-36
LOC400655	6.82541	9.15632e-06
OTOG	6.82468	1.4168e-06
PAX1	6.82439	1.99762e-06
LUM	6.8215	4.52868e-07
GPC4	6.81804	1.78018e-116
HOXD1	6.81372	2.47983e-07
PHF21B	6.80204	5.87692e-18
UGT3A2	6.79825	5.97986e-10
DCLK2	6.79267	1.66289e-14
ONECUT3	6.7866	0.000419907
PNMA2	6.78326	3.97328e-40
MIXL1	6.7814	3.06315e-07
AMOT	6.77976	0
NEUROG2	6.77501	5.43862e-07
FOXB1	6.77249	2.25091e-21
AK5	6.76746	4.27219e-07
OLFM1	6.76689	2.56372e-05
NELL1	6.76418	0.0218904
SDK2	6.75801	2.21237e-69
HAGLR	6.75671	1.0255e-36
L3MBTL4	6.74282	4.86166e-07
GABRA3	6.73806	9.9399e-06
SAMMSON	6.73624	1.20376e-06
KCNK9	6.73168	2.33812e-06
ZNF208	6.72064	0.0116772
JAM2	6.71922	1.66388e-07
SATB1	6.71331	5.41134e-59
PAX2	6.71233	6.94041e-14
TMEM145	6.70842	4.39588e-14
SLC5A5	6.70621	1.57301e-07
TSPAN18	6.69962	5.45845e-35
KCNJ3	6.69905	1.33672e-06
PCDH10	6.69736	1.46595e-72
ULK4P3	6.69655	6.53093e-07
MAN1A1	6.69488	2.68129e-117
GAP43	6.68978	1.01205e-06
LOC102723324	6.68223	1.25149e-06
SCN4A	6.68158	1.57097e-06
STXBP5L	6.68141	1.85589e-07
NKAIN2	6.67433	3.28618e-07
CRISPLD1	6.66258	2.53314e-38
GUCY1A1	6.65215	7.19564e-18
GOLGA8IP	6.65188	1.0254e-06
PIK3R5	6.64578	1.81653e-06
SPSB4	6.64334	2.80512e-09
LOC105377335	6.64092	6.75935e-07
BRSK2	6.63804	1.86481e-56
KCNC1	6.63588	6.49e-22
COLGALT2	6.61539	2.14966e-32
HAPLN2	6.58938	2.59225e-06
KCNN1	6.58877	5.53572e-07
TMEM271	6.58608	0.0112291
TSPEAR-AS1	6.58227	5.72848e-06
WSCD1	6.5816	2.65068e-38
ADGRB1	6.57543	5.27123e-08
HAND2-AS1	6.57541	1.94335e-06
LOC105376277	6.56833	5.33068e-06
IKZF1	6.56507	1.13932e-05
FREM1	6.55833	1.72225e-06
GALNT16	6.55629	3.67336e-36
ST8SIA5	6.55357	1.2822e-06
IGSF21	6.55039	0.0169174
OXGR1	6.54973	1.54474e-06
CDH23	6.54231	1.34822e-08
TUBB2B	6.53388	1.48402e-129
PACRG	6.52842	1.46132e-06
PPFIA2	6.52813	6.8153e-07
PPP1R1C	6.52501	2.19982e-06
HS3ST3A1	6.52051	1.35442e-45
PCSK5	6.50911	1.10776e-36
LINC00648	6.50654	1.94906e-17
DGKK	6.50493	5.24285e-05
STK33	6.50452	5.97496e-21
COL9A1	6.50323	5.10734e-05
SLCO6A1	6.50311	2.39876e-06
LOC101928978	6.50301	2.80713e-06
ELMO1	6.49992	1.33899e-12
LINC01551	6.49363	2.72839e-06
KCNA1	6.48425	7.09911e-05
DAAM2	6.47901	5.18903e-33
CLCNKB	6.47847	4.66185e-06
HOXB5	6.46875	5.05039e-25
TRIM71	6.46635	1.83891e-39
CHRNA4	6.46372	2.47e-06
CYS1	6.46197	4.0733e-06
GDF6	6.46028	2.2504e-08
MPPED1	6.45795	5.63576e-06
LGI2	6.45609	3.43795e-16
PTGFR	6.45441	6.02475e-06
ZC4H2	6.44674	5.44017e-20
UTS2R	6.44164	3.35026e-06
C10orf82	6.4381	7.04677e-07
AQP4	6.43675	6.34405e-06
LMOD1	6.43415	8.94017e-13
C8orf34	6.43213	4.54833e-09
ZIC1	6.42609	1.03864e-06
ESPNL	6.42601	9.38514e-07
PCAT7	6.42328	3.55531e-06
MIR10B	6.41397	3.37918e-06
HS3ST5	6.41084	9.35688e-06
ZNF804A	6.4108	1.94352e-06
HEY1	6.40866	8.13591e-278
PHEX-AS1	6.40111	0.0262653
ADAMTS19-AS1	6.39306	2.85406e-06
FOXF2	6.38422	1.3454e-113
BMP7	6.38403	1.76712e-109
KRTAP19-1	6.38069	0.000202844
TMEFF1	6.3793	2.03577e-06
TMEM229A	6.36888	3.50045e-06
PCOLCE-AS1	6.36756	2.74898e-06
FGD5	6.36655	5.62995e-05
CACNB2	6.3625	1.19993e-08
C8orf34-AS1	6.36092	3.71246e-06
PCDH8	6.35601	4.43342e-06
HCN4	6.34661	6.20895e-05
RBFOX3	6.34219	6.93528e-06
HOXC-AS1	6.33893	1.63896e-06
FRMD1	6.32619	3.67464e-05
FBXL7	6.32609	2.20997e-05
PM20D1	6.31681	4.32662e-06
ZNF280A	6.30877	8.04585e-06
SLCO5A1	6.29806	3.27502e-25
LINC01783	6.29767	2.11491e-06
TMEM266	6.29756	2.34878e-12
COL14A1	6.29392	1.3425e-12
VIM	6.29068	7.63611e-44
KIF25	6.28963	7.28184e-06
CALY	6.28809	6.67609e-06
TUB	6.2875	1.22189e-204
CGA	6.28545	7.27506e-06
NRXN2	6.2773	5.33617e-06
RORB	6.265	2.67588e-15
ASTN1	6.25643	5.55997e-05
GATA5	6.25405	2.54503e-05
ENOX1	6.24975	1.12435e-32
COL2A1	6.22879	1.19529e-84
SCN9A	6.2232	2.16436e-16
BHLHE22	6.22252	8.07048e-06
FIBIN	6.22078	1.39848e-05
WIPF1	6.21947	3.42125e-50
PRKCB	6.21302	1.4534e-06
VCAN	6.20959	1.44519e-184
BMP3	6.20648	1.21473e-07
CDH22	6.19954	0.000165718
NKAIN3-IT1	6.19652	1.73081e-05
GATD3A	6.19269	3.82419e-19
HLA-DOA	6.18232	1.5982e-14
TNMD	6.17983	0.000318931
EPHB1	6.17888	8.15961e-12
AMHR2	6.17646	8.01265e-06
GRID2	6.17437	1.08861e-05
PAX7	6.17399	0.000573885
STMN2	6.16441	2.51034e-05
ATOH1	6.16042	9.71904e-06
DACT1	6.15651	1.32872e-33
SLC16A9	6.15506	1.49864e-32
LINC01166	6.15232	1.00323e-05
GLDN	6.14473	2.10055e-05
SAGE1	6.14468	8.06255e-05
COMP	6.14215	1.81463e-05
LOC100507377	6.13621	1.19488e-05
PPP1R16B	6.13255	1.12672e-14
ABCD2	6.11461	0.000104228
SOX1-OT	6.11362	2.3298e-05
PCSK6-AS1	6.10835	1.5531e-05
COLEC11	6.10749	1.44672e-05
ARMC3	6.10557	1.42685e-05
LOC105379152	6.10296	3.90665e-11
GOLGA8T	6.10127	1.41254e-05
COL4A3	6.09585	3.67986e-06
KNDC1	6.09193	1.65739e-07
C3orf20	6.08971	2.97888e-05
LOC101929759	6.08449	5.53764e-06
DIO3	6.07997	9.31501e-05
ZEB1	6.07743	7.75074e-83
GPM6B	6.07632	1.63076e-73
PLCL1	6.0705	9.34084e-12
LOC101928847	6.06644	2.84603e-05
HECW1	6.0488	2.28667e-05
MEF2C-AS1	6.04254	1.93299e-05
CHRD	6.03949	8.89714e-08
NPAS3	6.03677	6.89402e-06
LINC01397	6.02874	1.75396e-05
CHST9	6.02766	6.62215e-08
SYT5	6.02411	7.38868e-06
NCBP2L	6.02165	1.67623e-05
LINC01167	6.01983	1.81495e-05
TRIM54	6.00843	7.39804e-05
AFF3	6.00815	2.888e-39
LINC01152	6.00707	4.5215e-05
OPRD1	6.00174	2.66474e-07
NTRK3	6.00061	0.0002385
LINC01033	5.99968	2.76207e-14
COL6A5	5.99413	0.000157553
RSPO3	5.99159	0.00100918
HOXC9	5.99053	1.08013e-73
G2E3-AS1	5.9894	2.5748e-05
DNM1P46	5.986	3.85333e-05
LINC02249	5.98499	1.0425e-05
GBX1	5.98457	7.95395e-08
LLPH-DT	5.98189	8.48617e-08
SLC9A9	5.97928	5.07518e-05
CCKBR	5.97464	8.34622e-05
DOCK11	5.96778	3.37256e-107
CACNA2D1	5.96729	5.54151e-73
BOC	5.9644	1.64197e-39
TXLNB	5.9644	2.20532e-05
GRIK4	5.96353	1.10069e-05
RAB6D	5.95517	1.39355e-07
KCNJ2	5.95182	3.75976e-05
CABP1	5.94892	2.13426e-07
NKAIN1	5.94714	3.00696e-16
WNT11	5.94492	6.18818e-21
EXOC1L	5.94001	3.82495e-05
CABCOCO1	5.93505	2.8394e-05
EN2	5.93501	1.2393e-275
CACNA2D3	5.92567	4.21182e-20
SNTG2	5.92535	4.08314e-05
STK31	5.9134	6.46886e-11
HS6ST3	5.90937	3.34031e-23
LINC01456	5.90653	3.15573e-05
LINC02268	5.90593	7.59105e-05
SLC30A3	5.90541	3.29613e-13
NFATC4	5.90353	3.14785e-47
MYO1F	5.90214	4.09934e-05
PWP2	5.90143	3.60324e-45
SPATC1L	5.90114	9.08794e-89
TULP2	5.89967	9.21861e-06
PRR26	5.89356	5.24314e-05
WAS	5.89145	1.01207e-05
PTPN5	5.88646	0.000184721
SLAIN1	5.88029	1.47383e-164
GALNT13	5.87641	5.39518e-81
PALM	5.87427	5.27776e-43
GDNF-AS1	5.8684	1.82232e-05
TCEAL7	5.85812	0.000158839
AXIN2	5.85047	1.68213e-28
FLJ34503	5.84978	4.03298e-05
NAALAD2	5.84874	2.23893e-13
POMC	5.84559	4.00073e-05
CHST1	5.84536	0.000435294
CCDC85A	5.84322	0.000566599
ABCA8	5.83464	0.000121562
NUDT10	5.83315	3.01221e-38
SLC43A1	5.83284	8.43956e-60
ARHGEF26-AS1	5.83104	1.16781e-05
MIR1-1HG-AS1	5.82972	0.000338406
ATP8A1	5.82811	5.92815e-68
ATP2B3	5.81403	0.000774617
ARHGAP20	5.80733	1.11196e-19
KCNQ1	5.8053	1.3096e-05
LOC100128108	5.80308	6.55032e-05
EMILIN3	5.8025	6.24399e-35
B3GAT1	5.80102	5.31983e-06
LINC01446	5.79993	0.000214954
FER1L6	5.7932	0.000452267
SOBP	5.78468	9.36738e-37
NDST4	5.77953	2.59948e-05
KDR	5.77818	8.43148e-05
PIK3CD-AS2	5.77382	4.42461e-18
LMO1	5.7731	0.000122578
PRR35	5.77166	9.31865e-05
SCARA5	5.76685	4.46232e-05
MYOD1	5.76247	0.000154299
COL3A1	5.75491	1.47933e-08
ANXA6	5.7528	6.47855e-55
LINC02367	5.74807	2.44211e-05
NPY5R	5.74495	0.000150776
EPHA4	5.74433	2.16805e-85
WNT2	5.7438	0.00269775
SH3RF3	5.74302	1.08081e-46
DNAJC5G	5.73377	0.000148258
MIR4713HG	5.72663	0.000127247
DNAH8	5.72437	0.000249878
GALNT9	5.72271	0.000425777
SHISAL1	5.7203	5.99878e-19
PTPRO	5.71837	5.10621e-05
NCAM1-AS1	5.71551	0.000110407
LHX9	5.70012	7.15817e-07
SULT2A1	5.69816	0.000286136
FBN3	5.6958	0.000212282
VIPR2	5.688	0.000390713
LOC105374338	5.68618	0.000464214
TMEFF2	5.68384	8.253e-05
EFHD1	5.68093	4.44483e-51
ACVRL1	5.67884	0.00322502
LRRN3	5.67668	0.00254356
RAB40AL	5.67443	0.000126229
NOS2	5.66631	1.37255e-09
ZNF556	5.66624	0.00214947
PLCB1	5.65976	2.41991e-47
ELMOD1	5.65412	4.01901e-32
KCNH2	5.65011	2.10177e-13
VSTM2B	5.64955	0.00467931
SHH	5.64951	0.0018868
ADGRE1	5.64585	0.00366593
PGR	5.62737	0.000285212
CHST8	5.62608	8.30789e-11
LINC00877	5.62273	0.000336002
DRICH1	5.61677	0.000152984
SLC10A4	5.61649	1.51175e-09
NPIPB9	5.61558	0.000234966
GUCY1B1	5.60618	4.79505e-57
KCNA3	5.60457	0.000168673
CCDC170	5.60364	3.36616e-05
FNDC1	5.60317	2.04077e-08
SLC1A1	5.59754	4.4156e-30
ASIC4	5.59697	0.000245913
HOXD12	5.59689	0.000232233
RAB39A	5.59683	5.18065e-18
KCNN3	5.59227	9.71529e-05
DIPK1B	5.58861	3.14018e-182
FRMPD3	5.5752	1.93665e-11
CUBN	5.56964	0.000146837
GALNTL6	5.56777	6.77727e-12
TRDN	5.56588	0.000192965
TMEM272	5.56313	0.000188775
CELF3	5.56037	0.000318996
SEMA3G	5.55933	5.66034e-21
LCN15	5.55343	0.000328137
LOC101927293	5.55087	3.18081e-12
FILIP1	5.55022	0.000166176
LMF1	5.54877	3.6495e-22
CDH20	5.54156	0.00103587
FRG2B	5.5401	0.00233274
LINC01748	5.52409	2.64139e-06
TTBK1	5.52261	0.00023714
PIEZO2	5.51586	0.00119414
PLD5	5.51565	0.000332669
AVPR1A	5.51528	0.000361251
LOC101928812	5.51528	0.000361251
RENBP	5.51349	8.78473e-11
KCNK13	5.51308	0.000143126
RBM20	5.51187	7.29284e-81
AMER2	5.50897	0.00230912
IGDCC4	5.50609	7.9489e-42
MYT1	5.50456	4.54497e-09
NTRK2	5.50102	1.42652e-08
PRKAR2B	5.49031	2.0975e-123
ZEB2	5.48944	3.50945e-90
SYT2	5.48853	7.24438e-05
PHF24	5.48582	0.00023166
LINC00351	5.48244	0.000437331
VIM-AS1	5.48196	4.03795e-61
DUSP26	5.48092	0.000300029
ACTL8	5.47889	0.000380829
RFPL4A	5.47669	0.0024014
LOC645752	5.47472	0.000616597
ZNF727	5.47054	0.00244996
ZSWIM5	5.464	1.39066e-36
ITM2A	5.46019	0.00542616
LINC01297	5.45859	0.00026029
KCNH5	5.44811	0.000320566
SYNGR1	5.44662	5.67707e-118
KCNJ10	5.44343	0.000462088
WIF1	5.43977	0.000405126
POU4F2	5.43387	0.000588094
GALNTL5	5.42846	0.000762509
DYDC2	5.42343	0.00160797
SKOR1	5.41817	4.36447e-11
CACNG5	5.40802	0.000310934
FBXL21	5.40053	3.35212e-16
SCN11A	5.40026	0.000488378
LINC02232	5.3995	0.000453959
SHISA2	5.39875	2.89954e-28
LOC100507468	5.39376	0.000680952
LINC01977	5.38885	1.98837e-08
CLGN	5.38686	6.98403e-80
DRD1	5.38627	0.00173325
GIPC3	5.38344	1.34507e-12
RAI2	5.37995	2.01996e-07
CCDC177	5.3767	9.49003e-05
COL6A6	5.3751	0.00366218
NKAIN3	5.37065	0.000904939
FOLH1	5.36948	0.000395847
ATF7IP2	5.36167	2.71438e-28
HOXA11-AS	5.35766	6.94413e-25
OCA2	5.3566	2.69115e-11
BMP5	5.35245	0.000754484
PCAT19	5.35245	0.000291949
TSKS	5.34813	0.00113064
LOC105370809	5.34572	0.00136046
LOC107986412	5.3403	0.00129018
IFFO1	5.33829	1.37714e-113
SHISAL2B	5.33475	0.000107788
SNORD69	5.33024	0.000652928
CYFIP2	5.32912	4.85637e-183
B3GALT1	5.32827	1.67527e-05
RTN1	5.3278	7.50902e-14
LPL	5.32399	5.24816e-13
LOC102723548	5.32057	0.000486067
MTUS2	5.31931	0.000240094
NME5	5.31207	0.00133423
BARX1-DT	5.30483	0.00111882
GXYLT2	5.30133	3.06665e-47
RAB6C	5.30108	0.000167817
ILDR2	5.29305	2.90036e-32
HLX-AS1	5.28083	0.000641929
SULF1	5.27279	7.58154e-31
TSPEAR	5.26985	0.000928782
SLIT1	5.26951	4.12657e-12
CFD	5.26907	7.03925e-23
PEG13	5.26575	0.000682744
ARID3C	5.26297	0.000754393
BRINP2	5.25957	0.00136399
CYP4F22	5.25565	0.00181505
FRG2C	5.2548	0.0045568
RUNDC3B	5.25479	2.7422e-40
CACNG7	5.25452	0.00506562
ART5	5.25373	1.13319e-10
SCN5A	5.25261	2.18308e-19
FAT3	5.25145	2.35295e-37
VAX1	5.25134	3.86569e-08
ETNPPL	5.25134	9.98312e-06
RIMS4	5.25128	2.69108e-139
NR2F1	5.24723	1.46635e-185
C8orf88	5.23461	2.96812e-50
SLC24A4	5.2337	8.77501e-08
SNAP91	5.23196	3.97231e-11
METTL11B	5.23144	0.000814453
DCT	5.22818	6.24597e-05
GRIK2	5.2259	0.000906055
ELOVL2	5.22579	5.44673e-76
LOC100240734	5.22321	0.000826514
CT55	5.22148	0.00122286
GSC-DT	5.21717	0.0012637
HTR6	5.21538	3.22093e-07
TDH	5.21478	0.000165567
LOC105374524	5.21339	0.00208282
LINC02387	5.21324	0.00107199
DSCR8	5.21267	0.00253612
SFRP4	5.21205	0.00201577
RASGEF1B	5.21095	7.50484e-40
TKTL1	5.2067	0.00160362
GUCY1A2	5.20579	1.11913e-12
IGSF11	5.20038	4.03498e-08
MLC1	5.19972	6.33886e-05
ADAMTS18	5.19903	0.00390737
FAM163B	5.19703	0.00751403
RSPO2	5.19288	0.0115966
ADGRV1	5.19089	9.56708e-60
TMEM220-AS1	5.186	0.000929568
MEF2C-AS2	5.17909	0.000787901
C2orf72	5.17905	8.94106e-18
ATP12A	5.17892	0.000787901
LINGO3	5.17851	0.00033627
SLC29A4	5.17238	4.43156e-37
KCNA6	5.17031	0.00607168
LINC01915	5.16349	0.00155458
CT45A10	5.15428	0.00619759
LOC440173	5.14318	1.2611e-19
CCDC181	5.14293	1.04567e-45
FSTL5	5.14036	0.00552445
HEYL	5.13878	3.10755e-32
BHMG1	5.1326	1.41349e-05
PCK1	5.13025	0.00037551
PAK5	5.13009	0.000994944
HOXC-AS2	5.1288	5.97986e-10
HOXB-AS3	5.12705	1.19157e-20
PRKN	5.12692	1.06254e-05
NECAB1	5.12658	0.00171335
KCNMB2-AS1	5.12601	1.1328e-05
LOC105373884	5.1212	0.00108177
LRRTM2	5.11936	0.00114731
SFTA3	5.11707	0.00273583
ELSPBP1	5.1145	0.00146637
TUNAR	5.10842	0.00310582
LOC100132874	5.10063	0.00252211
FER1L5	5.09917	0.00949015
H2BFWT	5.09821	0.00225681
LINC01411	5.09323	0.000599613
MIR3939	5.0925	0.00150102
LRP2	5.08984	6.3888e-68
GJA5	5.08371	0.00164035
FLT3	5.06819	1.67686e-05
SLC25A48	5.0677	4.96529e-12
DGCR6	5.06655	0.00148314
TDO2	5.0664	0.00144283
DIRAS2	5.06495	0.00183563
LOC101927359	5.06233	1.41189e-05
CD33	5.06202	0.00211671
NPTX1	5.06127	1.01599e-180
SH3GL2	5.05809	3.78726e-11
LOC101927345	5.05651	1.39659e-09
CNTN1	5.05622	1.13597e-38
RIMBP2	5.05451	0.00757031
LINC02293	5.05	0.00362833
NCKAP1L	5.04735	0.00451416
LINC02588	5.03803	0.00219441
TRABD2B	5.03796	8.46569e-12
TMEM63C	5.03777	3.37736e-17
SLCO4C1	5.03597	1.6972e-15
LINC02428	5.03156	0.00159712
LINC01351	5.02961	0.00148528
APOC1P1	5.02871	0.00209443
ROS1	5.02849	0.00368784
CRTAC1	5.02739	1.16412e-05
DAPK1	5.02535	1.49376e-127
DIRAS3	5.02028	0.00144285
ESRRB	5.01473	1.10456e-09
LINC01159	5.01251	0.00177563
GPC3	5.01237	3.05713e-125
METTL24	5.008	0.00371679
SLC7A10	5.00486	0.00270222
LINC02266	5.00281	0.0105065
ST8SIA1	5.00129	0.0036737
EFNB3	4.99674	5.06334e-27
INSM2	4.99626	0.0101068
LMX1B	4.99346	9.0277e-57
HTR3B	4.9932	0.0119249
SOX6	4.98827	5.39852e-24
HGF	4.98656	0.0171234
GRIN2C	4.98611	8.1648e-07
FAM183BP	4.98273	0.00268672
HS3ST3B1	4.97882	4.05199e-66
MIR4500HG	4.9785	2.96916e-05
PPM1L	4.97661	5.71377e-64
LOC101929234	4.97423	1.22589e-17
FAM19A4	4.97278	0.00338157
NECAB2	4.97108	2.45114e-05
OR7E12P	4.96984	0.00486429
KCNT2	4.96964	2.08381e-20
KCNB2	4.96173	2.30942e-05
C8orf49	4.95897	0.00244628
LOC102467226	4.95593	0.00282428
TRG-AS1	4.95567	0.00300875
LOC101928894	4.95557	0.00224535
ADGRD1	4.95424	0.00431435
PCDHB2	4.95298	0.00478794
MSH4	4.95298	2.96702e-05
GNAZ	4.95292	3.12381e-62
FRZB	4.95121	0.00395136
XG	4.94884	0.00496082
FLJ12825	4.94675	0.00319921
GPC5-AS1	4.94437	0.00567754
NMUR2	4.94246	0.0112523
LHX4	4.94038	1.42744e-39
TRPC3	4.93657	2.03429e-11
MUC19	4.93605	0.0115389
PCDH17	4.93431	4.41629e-46
ST8SIA2	4.93255	0.0202327
MAGEB6	4.93115	0.0149192
KLK2	4.91123	0.00314713
ANKRD20A8P	4.91024	0.00290152
COL20A1	4.90913	0.00323946
DGCR9	4.9085	0.00214508
ANGPT1	4.90797	4.66904e-05
UGT2B4	4.90569	0.00283607
LIX1L	4.90417	3.2229e-250
LINC01639	4.90287	0.0160437
CNGB3	4.89956	0.00357688
NAT2	4.89938	0.0028067
DBX2	4.89829	0.00260478
PTGER3	4.89569	0.00180593
PRKAG2-AS1	4.89174	1.88282e-34
MIR7-3HG	4.88875	0.0113031
GLI1	4.8887	2.20933e-10
TMEM132B	4.88786	4.21159e-05
MMP16	4.88684	3.87088e-32
ST8SIA4	4.8802	7.88436e-15
MYL1	4.87141	0.00942805
CYTIP	4.85672	0.00488302
NMUR1	4.85425	0.00717953
INSYN1-AS1	4.85337	0.00607154
LCMT1-AS1	4.85223	8.657e-11
LOC105369980	4.85101	0.00523341
MAPK15	4.84785	1.51871e-43
ASIC3	4.8463	5.69849e-20
RFTN2	4.84483	0.000794885
LOC101927762	4.84383	0.00429468
PIANP	4.84284	3.39404e-07
LOC102546299	4.8378	0.00535954
KRTAP21-2	4.83589	0.003577
LOC101927657	4.83589	0.003577
GPR12	4.83554	0.014547
FOXB2	4.83537	0.00428599
LINC01305	4.83531	0.00357825
FOXJ1	4.83491	0.0159924
BEND5	4.83397	0.00620978
ARHGAP36	4.83126	0.00434654
SYNDIG1	4.82921	0.0174005
GAS1	4.82474	2.78674e-30
DCAF8L1	4.82292	0.0134027
CSMD1	4.82263	0.0111869
LINC01139	4.81325	0.00944291
LINC00870	4.80856	0.0205711
RAB40A	4.80375	1.28524e-06
LOC100506688	4.80345	0.0018506
AK7	4.79791	2.99702e-14
SHISA7	4.7946	0.00247433
CCDC140	4.79446	0.00495883
DIP2C	4.78979	5.56063e-47
GSTM2	4.78647	1.03374e-21
FAM86B2	4.78619	0.00415274
PPM1E	4.78575	3.72799e-97
CCDC38	4.78549	0.000915568
LINC01780	4.78392	0.0038211
GDF10	4.7825	0.00566157
PIP5K1B	4.77963	5.76897e-12
PRAM1	4.77418	0.00423518
LOC100128164	4.77266	0.00628833
SULT1C2	4.77206	0.0054484
CFHR3	4.77153	6.79989e-05
NKD2	4.77005	4.45906e-12
CHST4	4.76882	0.00574606
LINC02346	4.76498	0.00689031
PLEK	4.76468	0.00709054
PTPRVP	4.76468	0.00709054
GTF2IP7	4.76111	0.00884907
POSTN	4.76111	0.00884907
COLQ	4.76076	1.87735e-06
MCF2L	4.7606	6.8436e-18
LOC105369203	4.76016	0.0124885
PRKCG	4.75875	0.000255633
CTCFL	4.75843	0.00714326
PVALB	4.75272	0.0171234
ALG1L	4.7451	1.7976e-15
STMND1	4.73477	2.20191e-06
STXBP6	4.73468	1.61442e-13
GHR	4.73162	2.51312e-08
USP51	4.72998	8.61103e-17
CTD-2201I18.1	4.72896	0.00946527
SYCP2L	4.72724	1.89183e-22
MAGED4B	4.72708	0.00558033
DOCK3	4.72312	1.00178e-56
RHOJ	4.71759	0.0112544
TRIM9	4.71427	5.37074e-92
THPO	4.71226	0.00458881
SALL2	4.71217	4.14712e-164
LINC02269	4.70846	0.00643771
RTN4RL2	4.70836	3.49009e-28
NPC1L1	4.70654	0.00136234
MEIS1-AS3	4.7041	0.0021572
ITGAD	4.70376	0.0105
GABRD	4.70375	0.000165267
LINC01164	4.70329	0.00888006
PPP1R14A	4.70296	6.10455e-28
MIR6720	4.70149	0.0002184
LOC101927503	4.70061	0.00824514
LRIG1	4.69914	5.67517e-135
TMEM35A	4.69866	0.00650475
DCX	4.69708	0.00762295
ZNF502	4.69515	4.35114e-08
PRAC2	4.68674	0.0117858
FXYD6	4.6841	4.3177e-15
ACAN	4.68407	0.0240478
ZNF43	4.6835	0.0247232
PAQR8	4.68088	7.10707e-50
BCL11B	4.67878	3.02178e-21
TRIM43	4.67804	0.0298868
ADAMTS5	4.67028	0.000149401
IL9R	4.66192	0.0106487
HSPB9	4.6564	0.00973862
BTNL9	4.65161	6.57896e-70
C11orf96	4.64993	1.19228e-12
ITIH6	4.64747	0.0102757
INSRR	4.64301	0.00577231
SYN3	4.63936	1.55522e-13
ATP1B2	4.63723	2.51318e-10
KHDRBS3	4.63187	1.1891e-55
PTPRD-AS1	4.63163	0.00776178
XKR5	4.63146	0.00732908
CACNA1I	4.6304	0.00249968
SCN2B	4.62908	0.00222038
LDHD	4.62687	0.00413763
KIF6	4.62673	6.76216e-11
LINC01918	4.62623	0.0135581
ANKRD26P1	4.62435	0.0105667
LGI1	4.62203	0.0102021
ZNF703	4.61943	0
LDHC	4.619	9.90039e-21
ANKFN1	4.61521	0.0232634
DKK2	4.61017	0.000267837
ZNF98	4.60345	0.0346677
SOSTDC1	4.60059	0.000280299
MAPT	4.60027	4.83028e-52
PARM1	4.6002	3.46197e-36
TENM4	4.59688	4.90115e-28
HUNK	4.592	3.48135e-32
BNC2	4.58927	4.13285e-23
MINAR2	4.58879	0.0258636
EPHA3	4.58864	5.14469e-62
GPAT2	4.58842	0.0027777
FIGNL2	4.58321	0.00863064
FAM124A	4.58224	4.04898e-19
RHOXF1	4.57987	0.00877046
LOC392232	4.57821	0.00885033
FAM43B	4.57703	2.44192e-07
GP1BA	4.57546	0.0075121
LINC01396	4.57282	0.00696009
NR5A1	4.57192	0.00915837
CACNA1G	4.57071	1.31369e-07
CCDC178	4.56823	0.0106181
BAMBI	4.56539	1.39361e-38
STON1	4.56341	6.92602e-26
HLA-DRB5	4.56057	0.000153102
C4orf50	4.56	0.0124936
SPEM2	4.55954	0.0092851
RNVU1-15	4.55937	0.00885659
CSPG5	4.55841	1.78455e-75
PPP1R3A	4.55543	0.00932976
ARHGAP6	4.5531	0.0137772
ASB11	4.552	0.0126177
MIR3187	4.54565	0.027845
GPR101	4.54471	0.029633
LINC00599	4.54282	0.0350467
B3GALT5-AS1	4.54203	0.0486892
TMEM170B	4.53952	1.49658e-143
CACNB4	4.53681	4.54285e-35
SLC1A2	4.5358	0.00574786
ZBBX	4.53553	0.00244
ZNF257	4.53534	0.0316127
CELF5	4.52894	7.14885e-13
EMID1	4.52725	3.59635e-16
C1QL4	4.52391	1.10878e-11
GRIN1	4.51101	0.000195596
AMH	4.51059	5.5431e-95
ATP7B	4.51014	4.25524e-132
ITIH4	4.50772	0.0122136
C3orf80	4.50611	1.60794e-10
LOC101929657	4.49746	0.0111536
H2BFM	4.4971	0.0155789
NKD1	4.49616	6.27261e-46
ASPDH	4.49482	0.00894584
ATP6V1B1	4.49262	0.0120527
KRTDAP	4.4906	0.00967254
CREB3L1	4.48658	7.0868e-10
NCALD	4.48447	1.91895e-10
ESX1	4.4802	4.63887e-07
SFRP5	4.48	0.0152344
PTF1A	4.47833	0.0113893
SLITRK5	4.47686	1.73668e-78
PLCH1	4.47656	5.20106e-48
REEP1	4.47481	1.36874e-39
DOK5	4.47465	0.0162129
PLA2G7	4.46962	3.66435e-09
EPHA6	4.46917	4.87941e-18
CYP2F1	4.46627	0.04216
LOC390937	4.46558	0.0112938
LOC105376268	4.46447	0.0197985
OR51B5	4.46424	0.0324473
ZNF676	4.45813	0.036435
GRM5	4.45669	0.0371512
MAFB	4.45627	1.39803e-21
ADAMTSL1	4.45563	0.00105322
FGFR1	4.4552	2.3185e-186
PLXDC2	4.44629	2.19672e-36
MEGF10	4.44211	0.000758499
GFPT2	4.43669	3.27197e-56
CNRIP1	4.43304	1.3477e-29
SMIM10L2A	4.42665	7.2686e-46
COL6A3	4.42505	0.00826729
TET1	4.42353	6.29477e-66
HMGCLL1	4.42196	3.94908e-07
OR2AG2	4.41994	0.0135041
HECW2	4.41474	6.68935e-28
FPGT-TNNI3K	4.41427	0.0127372
LOC101927635	4.41336	0.00363645
CCDC3	4.41265	2.7399e-45
NKX2-1-AS1	4.40482	0.0156954
LINC01121	4.40449	0.0172338
HOXA11	4.39853	8.23791e-107
LINC00355	4.39842	0.0180288
LOC100507351	4.39794	0.0398944
NHLRC4	4.39602	0.0352726
TBC1D10C	4.39546	0.0206278
DPEP1	4.39478	0.0158957
ACR	4.39459	0.0148175
ARHGEF7-AS2	4.39134	0.0170379
EVX2	4.38997	0.0170657
DRC7	4.38705	0.018617
SLC35D3	4.38676	0.000473986
FRG2EP	4.38663	0.0198024
RFPL4B	4.3861	0.0219246
TRIM67	4.38248	0.0274161
ARHGAP28	4.3817	8.45975e-26
TMEM31	4.37261	0.00455337
PGGHG	4.36628	1.37677e-79
ADAMTS13	4.35956	5.04399e-55
JCAD	4.35903	3.45233e-66
RAB39B	4.35864	4.13218e-17
CCDC184	4.35231	7.70795e-08
MIR1180	4.3498	0.0247164
FSIP2-AS1	4.34966	0.000625004
NPY1R	4.34495	8.02533e-09
FAM89A	4.34196	9.66801e-75
UBL4B	4.3329	0.04639
NLRC3	4.33116	0.030431
TMOD1	4.33097	5.88622e-60
COL6A4P2	4.3283	0.0151359
SELENOP	4.3282	6.7674e-38
NOTCH2NLC	4.32739	0.0225984
MEX3B	4.3258	1.10202e-62
LINC02466	4.32556	0.017801
FAM90A25P	4.32212	0.0168511
ACTN2	4.32158	4.59997e-45
TMEM200A	4.32075	0.0276722
LOC642943	4.31928	0.0179387
STAP1	4.31842	0.0179583
C1QTNF4	4.31834	0.0202664
LUZP4	4.31738	0.015326
LOC101927855	4.31562	0.0169799
TOGARAM2	4.3133	3.07325e-05
ZNF597	4.31329	6.11489e-14
CES3	4.31175	1.32319e-55
RSPH14	4.31165	0.00820486
LAMP5	4.30954	0.0181535
TEX41	4.30954	0.0181535
ANKRD34C	4.30923	0.0357454
MAGEB17	4.30923	0.0357454
LOC101929439	4.30857	0.0234771
MYO1G	4.30788	0.0216853
LIX1	4.30757	0.0395453
FLJ33534	4.30664	0.0260913
VCX3A	4.30314	0.0447356
DLGAP1	4.30254	0.0438104
LINC02105	4.30046	0.0494223
FGF19	4.29953	0.0420829
A2M	4.29803	0.0339925
LOC102724623	4.29751	0.0450864
GRP	4.296	0.0444282
KIF26B	4.29396	1.20626e-21
DCHS2	4.29393	0.000951738
MAGEB18	4.28922	0.0490328
ERBB4	4.2853	4.30796e-22
PTH1R	4.28332	4.26059e-05
DLX1	4.28243	1.09776e-96
SHD	4.28162	0.0147321
KLF15	4.28092	6.34243e-29
NOTCH2NLA	4.2777	0.00593138
RCAN2	4.26896	2.78116e-11
DPF3	4.26524	6.87409e-20
DCDC2	4.26461	1.17e-07
LINC00634	4.2622	2.09886e-11
EFR3B	4.26185	3.23717e-47
CNTN5	4.26136	0.00508596
LRRC36	4.26062	0.00515781
SYTL5	4.25867	7.88853e-21
GPR1	4.25814	0.00576902
TMEM47	4.25773	3.48166e-35
DPYSL3	4.25511	3.97878e-47
DKKL1	4.25471	0.00746407
LINC02444	4.24217	0.0220992
ZNF843	4.23913	0.000130112
LOC646588	4.23658	0.000633384
SLC17A7	4.23359	3.63641e-10
PITX2	4.23174	1.40704e-66
SHISA8	4.22904	4.1632e-16
C5orf58	4.22823	0.0281628
LOC728755	4.22737	0.0201104
KLHL32	4.22407	1.53977e-06
MAOB	4.22368	4.01397e-05
KISS1R	4.22285	0.0305458
KCNB1	4.22213	0.00561637
TF	4.22201	0.0267304
TSPAN7	4.22148	2.37855e-39
LOC100128239	4.22041	0.0306431
ABCB5	4.21884	0.0227338
LINC01480	4.21778	0.0310041
ICOSLG	4.21742	1.31209e-09
SATL1	4.21334	0.000774145
DSC1	4.2129	0.0287298
PDE6G	4.2129	0.0287298
DTX1	4.21199	0.0287611
BRS3	4.21193	0.0249875
RGS6	4.21193	0.0249875
OVOS2	4.20669	2.54676e-10
SNAP25	4.20612	0.00767927
GPR88	4.20526	0.0394496
MAFA-AS1	4.20477	0.0385533
FGF12	4.20241	3.5248e-06
RARB	4.20205	4.45853e-49
KCNMA1	4.19929	2.73584e-05
GS1-24F4.2	4.19646	0.000910853
CNKSR2	4.19441	1.01152e-06
EFCAB10	4.1936	5.47832e-14
LINC01315	4.18634	8.70078e-10
PRRT2	4.18351	2.37675e-07
FAM13C	4.17245	4.09125e-12
GFRA3	4.16979	0.00259314
LST1	4.1651	0.0451741
TNFRSF13C	4.15969	4.50129e-15
SLC25A18	4.15414	0.0137233
DCDC1	4.15364	0.00137972
ARHGEF6	4.1515	4.67216e-36
NLRP14	4.15004	0.00111134
MAF	4.14677	1.01948e-58
MIR3665	4.14421	6.43165e-06
CDH7	4.14333	0.000106643
NDST3	4.14138	0.0271807
PPM1H	4.13975	9.77924e-90
LOC400499	4.13732	4.06555e-17
FOXO4	4.13669	1.26878e-29
LINC01625	4.13427	0.0259852
PTP4A3	4.13372	1.93404e-24
GCM1	4.13309	0.0321902
FOXG1	4.13256	3.74413e-119
ONECUT2	4.131	8.57622e-149
RASSF2	4.12976	3.12606e-29
SLITRK1	4.12154	0.0326844
GPR45	4.11845	0.0279854
RHOU	4.11638	2.05586e-76
LRFN1	4.1139	1.4006e-67
VCX	4.11334	0.044514
DPYS	4.11269	0.0381813
COL24A1	4.10943	1.79107e-13
PROK1	4.10939	0.0370113
WNT6	4.10938	0.000221721
RNASEH2B-AS1	4.10841	0.00839895
PLA2G3	4.10609	0.0462236
SSTR3	4.10278	0.0445976
UNC80	4.10137	0.0164869
GRIP2	4.09764	3.8907e-07
TCTE1	4.09565	0.00122266
ITPRIPL1	4.09471	6.32169e-106
SMARCD3	4.09434	9.21307e-92
P2RX2	4.09142	0.00256922
AANAT	4.08156	0.0121794
KIAA1211	4.08152	2.29974e-40
POU4F1	4.08131	5.11952e-189
EPDR1	4.07593	1.12232e-37
DMC1	4.07578	1.0125e-55
NPPC	4.07098	4.84192e-09
NHLH1	4.06918	0.00144362
RRH	4.06547	7.89409e-06
SMIM10L2B	4.0586	2.11918e-28
UBE2E1-AS1	4.05653	0.00925786
ZNF501	4.05064	4.46851e-18
LONRF2	4.04866	4.00778e-137
LRRC7	4.04679	2.15551e-06
KLHL41	4.04678	7.34691e-05
CHSY3	4.04244	2.41536e-17
ENHO	4.03858	3.8101e-22
GPR63	4.03601	3.78955e-62
RASGEF1C	4.03405	1.47838e-06
HAO2	4.03368	0.0435884
SCAT1	4.02448	0.041257
GABBR2	4.02261	1.22553e-07
GNGT1	4.02034	4.1805e-14
URAD	4.01992	0.0348361
HIST1H2AK	4.01959	0.00333146
SMPX	4.01946	0.0444008
NTRK1	4.0173	0.005611
STPG3	4.01468	0.0360622
CX3CR1	4.01413	0.0446964
FRMD7	4.01381	0.0418294
CR1L	4.01327	0.0199542
IGSF22	4.01148	0.047772
FAM155B	4.00886	1.4188e-72
MLNR	4.00866	0.038176
LINC01979	4.00812	0.042127
LOC101929122	4.00786	0.0479896
RGMA	4.0077	1.24011e-75
MOBP	4.00635	0.0422154
LOC105369593	4.00615	0.0458702
RHBDL3	4.00533	3.19642e-27
VPREB3	4.0037	0.0104523
MRO	4.00331	0.0121853
TTLL6	4.00225	0.045401
CAMK2B	3.99749	7.99734e-10
SGSM1	3.99315	6.50387e-14
RASGEF1A	3.98974	1.89472e-65
RDH12	3.98763	0.00645384
HOXA9	3.98725	1.18005e-136
NR5A2	3.98204	4.09295e-19
LINC01419	3.97962	0.000167806
PCDH9	3.97733	5.86238e-115
ATRNL1	3.97675	4.76874e-14
GFRA2	3.97196	0.0260063
PDZD4	3.96843	9.89618e-24
ARHGEF25	3.96265	1.21803e-77
PDE11A	3.95668	6.05523e-08
SIM2	3.95258	9.71022e-65
BMP6	3.94691	7.09298e-46
GFI1	3.94161	3.56337e-47
RPGRIP1	3.94149	0.0156295
SLC2A4	3.93223	4.34789e-12
CADM2	3.93085	3.39633e-06
C6orf118	3.9265	0.000394543
ADGRA2	3.92557	3.18978e-53
ASB12	3.92404	0.0218582
VCAN-AS1	3.92318	0.0471754
EDIL3	3.92016	6.35707e-19
ABCC9	3.91099	4.97008e-06
GAS7	3.91061	4.38157e-14
NEB	3.91034	1.88874e-15
LOC100505501	3.90872	0.000241351
EFNA2	3.90824	4.08577e-10
CACNG8	3.9071	1.67507e-41
NYNRIN	3.90523	2.31978e-32
LINC00173	3.90506	1.46007e-07
IGFBP2	3.9037	3.03435e-117
MAGED4	3.90251	0.0451741
MAPK8IP2	3.89792	9.13032e-97
CBS	3.89757	1.6393e-109
CYP2E1	3.89697	1.6202e-05
SYP	3.89323	1.08226e-52
LOC105378499	3.89153	0.0155912
TOX	3.88838	5.08165e-06
KCNJ11	3.88681	1.26988e-26
SPINK2	3.88518	1.5791e-05
TNNI3	3.87754	5.34422e-06
KIF26A	3.87741	8.81068e-120
SEPT4-AS1	3.87682	0.018786
FBN1	3.87649	1.64633e-37
GRASP	3.87626	2.92638e-06
SCRT1	3.87363	0.00439149
SAMD5	3.86585	1.93364e-61
REEP2	3.86383	6.41552e-57
RHBDL1	3.86317	2.19223e-34
NLGN3	3.86261	6.11835e-05
CYP3A5	3.85924	0.00779237
NTNG2	3.85703	4.66836e-06
TCIM	3.85571	0.0105734
PDE1C	3.85505	4.03223e-05
NAT16	3.85313	0.0444483
ATP1A3	3.85051	1.32521e-06
PDE1A	3.85005	0.00143778
SCML2	3.84613	1.55815e-168
HOXB6	3.83327	9.45831e-92
ABCG4	3.82839	4.07835e-11
LINC02600	3.82724	0.00841795
CDH2	3.82534	1.65724e-114
MIR4442	3.8246	0.0179388
LINC00304	3.8241	0.0202805
HBQ1	3.81998	1.76838e-10
KCNV1	3.81649	0.000462882
ASPRV1	3.81284	3.63972e-05
FOXD2	3.81012	3.27677e-22
TSC22D3	3.80165	1.73791e-117
NCKAP5-AS2	3.80141	0.00436404
PKN2-AS1	3.80094	0.000434428
CERKL	3.80039	0.000550328
NPIPB6	3.80017	0.000988306
RASGRP2	3.79156	3.59115e-10
CRNDE	3.79056	5.51849e-118
ZNF503-AS2	3.78898	3.03501e-94
LOC100507006	3.78158	0.000393937
ADGRG2	3.78148	1.68394e-07
TSIX	3.78074	1.06572e-100
EXTL1	3.78071	0.00950399
PGM5	3.7678	5.19757e-06
SPATA17	3.76767	8.42103e-14
KIF5C	3.76569	3.2156e-29
GDNF	3.76055	1.04177e-07
OTUD7A	3.7588	3.87163e-13
SH2D3C	3.75743	3.59085e-06
DCHS1	3.75653	4.96442e-10
GPR155	3.75649	3.9258e-28
FAM86B3P	3.75355	1.01953e-21
BAALC	3.75341	0.0115226
TOX3	3.75272	0.0352963
C3orf70	3.75057	1.38002e-11
SH3GL3	3.7473	5.14581e-44
ALOX15B	3.74674	0.0279078
UCN	3.73946	8.45693e-08
APBA1	3.73944	1.97216e-08
MADCAM1	3.73739	1.06443e-06
LOC101928402	3.73673	1.17837e-05
LOC400706	3.73501	0.0285963
RUBCNL	3.73212	2.39674e-08
ATP2A1-AS1	3.72947	6.63654e-46
DMBX1	3.72937	1.72775e-19
ARMC4	3.72888	3.92403e-28
ALPK2	3.72867	0.0405052
PPEF1	3.72856	0.00785085
PTPRD	3.72776	2.81793e-22
GDF1	3.71908	1.26355e-24
MAP3K15	3.71855	1.26838e-30
PCDH18	3.71851	2.95773e-20
ZNF300	3.71755	2.27306e-50
RND2	3.71616	7.15141e-47
IRX5	3.69996	5.86693e-25
ISLR2	3.69549	0.0086285
LOC105372421	3.6943	9.67478e-05
DISC1	3.69069	5.66028e-22
TCF4	3.69031	5.87214e-112
PRIMA1	3.68825	5.68036e-12
LTK	3.68594	3.87629e-09
PLEKHG1	3.68593	6.34203e-12
TEX46	3.68582	0.0263635
SEPT5-GP1BB	3.68411	0.0286588
GS1-594A7.3	3.68234	0.0247903
ANKRD18DP	3.68176	0.00103595
BCAN	3.67988	0.0278253
HIST1H2BN	3.67801	9.30764e-09
CBLN1	3.67177	0.00116153
GOLGA8K	3.67135	0.00656429
PLA2G4E-AS1	3.66801	0.0362747
SCUBE2	3.66769	0.00677661
PNPLA3	3.6674	7.68118e-47
SRSF12	3.66534	4.26908e-49
U2AF1	3.65959	1.03759e-07
EEF1A2	3.65806	4.18042e-11
ID4	3.65605	1.84054e-182
PDX1	3.65093	2.59644e-15
KLF9	3.64715	1.95194e-151
PTPRZ1	3.64697	7.42478e-09
UBE2QL1	3.64653	0.00324394
TMEM74	3.64341	3.84864e-22
PTCH2	3.64283	5.63237e-11
VASH2	3.64177	5.15612e-56
FBXW12	3.6401	0.00678973
WNT3A	3.63871	4.30142e-09
DNAH11	3.63488	4.29055e-41
LOC105376323	3.63108	5.23392e-07
COL6A4P1	3.63081	0.00141401
FAM57B	3.6307	0.00096479
EDNRB	3.62989	4.30721e-06
MAP1A	3.62219	5.06656e-22
ADAMTS17	3.622	7.30003e-36
ADCY5	3.62195	0.00195032
FBLN5	3.61767	1.8553e-26
DDR2	3.61044	1.29732e-22
HOXA-AS3	3.60723	4.57339e-22
ISL1	3.60185	3.22407e-41
CCDC116	3.58639	8.2433e-05
RNF175	3.58629	0.013221
DACT3	3.58569	3.16313e-12
CPB2-AS1	3.58567	3.21233e-11
EGR3	3.57826	0.000264685
HLA-DRB1	3.57812	3.06188e-06
PCDHGA11	3.57802	1.30781e-06
NT5C1A	3.57692	0.000414882
LHX1-DT	3.57515	5.02391e-10
LMO2	3.57399	3.13275e-07
ZNF506	3.57287	9.46142e-10
LINC01126	3.56715	6.79333e-06
RNF122	3.56569	4.10373e-28
LOC101928336	3.55665	0.00260416
PAX5	3.55278	0.00424581
KCNG3	3.54318	3.98556e-09
POLN	3.53887	6.21713e-08
LOC728554	3.53727	1.65954e-104
DUXAP10	3.53698	1.05491e-115
ACTA1	3.52807	2.83544e-05
HMCN1	3.52726	6.14929e-09
SLC26A10	3.52046	0.00289654
TRIM73	3.51789	0.0179135
ARMH4	3.51601	2.56782e-25
LOC105379057	3.51216	0.00234423
TLE4	3.5097	2.39638e-246
FES	3.50868	3.82155e-05
KCNK2	3.50495	0.0183429
BCOR	3.50481	0
TEKT3	3.50228	0.0110384
PPFIA4	3.49728	8.42324e-29
WASIR2	3.47802	6.87036e-08
ST8SIA6	3.46849	0.000532439
CCSER1	3.46837	3.19191e-17
CHD5	3.46791	1.42309e-06
KRTAP5-AS1	3.45977	0.0016257
LOC105377849	3.45607	0.0431382
SEMA6B	3.45211	2.57606e-05
DLGAP3	3.45036	0.000110715
KANK3	3.44917	4.78799e-06
TMEM110-MUSTN1	3.44739	0.00259366
LINC01359	3.44631	0.00227637
SLC4A4	3.44572	2.97895e-21
ANKRD34A	3.44539	1.45356e-19
ZDHHC19	3.44381	0.0474313
IGSF10	3.43901	2.9157e-05
CCDC152	3.43448	0.0288244
LOC100505635	3.43417	0.00187139
ADAM11	3.43414	2.08066e-81
ABCC6P1	3.43119	0.000710728
MUC3A	3.42965	0.000765658
PKDCC	3.41363	8.64807e-64
SLC6A16	3.4124	7.01254e-13
KLK14	3.4113	4.62826e-08
RNF125	3.41115	1.32575e-80
TBX2-AS1	3.40917	1.56696e-16
XIST	3.4076	5.47534e-122
EPHA5-AS1	3.40378	0.00204404
LINC00652	3.40295	0.00226534
AQP1	3.39953	0.00143049
FRMPD4	3.39604	0.000326393
SPOCK3	3.39437	6.82811e-20
SEMA6C	3.39399	4.71267e-49
TENT5C	3.39366	2.35919e-25
GFY	3.38959	0.0164111
ACHE	3.38806	1.46567e-06
CBX2	3.38781	3.10527e-223
PRKD1	3.38741	1.87212e-31
FAM78B	3.38727	0.000559513
CCDC162P	3.38622	2.73896e-16
ZMAT1	3.37705	3.62292e-05
TMEM220	3.37594	5.53012e-07
MLXIPL	3.37109	3.5829e-39
NUPR1	3.36894	0.000572964
LOC100996325	3.36535	0.0156698
MAST1	3.3621	5.72583e-25
PPFIA3	3.358	1.29362e-105
FLRT1	3.35275	8.37807e-05
ZDHHC11B	3.35264	1.87503e-11
NPAS1	3.34308	1.90521e-36
BSN	3.34277	7.32246e-33
PRDM13	3.33886	5.70687e-11
BTK	3.3336	0.000930309
ODF3L2	3.32985	0.00874991
CKB	3.32933	8.95813e-132
PLK5	3.32744	1.47709e-05
DNAH1	3.32023	1.68901e-28
PRSS27	3.31758	5.08359e-08
OPRL1	3.30958	1.6202e-05
LOC729732	3.30783	1.37574e-07
CARMIL2	3.30652	2.46438e-22
CD8A	3.30463	6.88162e-07
SLC13A3	3.3026	1.92536e-27
FHL1	3.30114	1.53302e-75
FGFR4	3.30004	2.43808e-68
LOC101927314	3.29707	0.0252863
C1orf61	3.28849	5.00646e-11
ONECUT1	3.28702	0.000267707
NTN1	3.28444	3.4682e-59
MAFA	3.27781	1.07817e-13
SLC22A31	3.27376	1.31861e-13
HMGN5	3.27354	9.04007e-130
SBK1	3.27241	2.05916e-36
LRRC34	3.26988	5.94616e-16
RGCC	3.26889	8.67114e-13
RAD51AP2	3.26518	0.024921
LOC101929719	3.2643	0.00835679
LINC02593	3.26087	8.96818e-40
ASIC1	3.25519	1.14132e-68
PELI2	3.2512	7.86665e-46
LINC01535	3.24951	1.31957e-13
EYA1	3.24797	1.08763e-24
C14orf132	3.24764	2.1829e-26
SHANK3	3.24377	2.45667e-90
PAX6	3.24222	7.15441e-84
REELD1	3.23433	0.0337122
TTPA	3.22918	0.00133003
GDA	3.22906	2.3959e-31
FGF22	3.22782	0.0361783
LOC100129129	3.2238	0.000140321
GSTA4	3.22002	6.80864e-75
ISL2	3.21793	1.7493e-58
GHRLOS	3.21306	7.55151e-06
SLIT2	3.20624	7.04707e-153
KLK4	3.2006	0.0385096
ACVR2B-AS1	3.19922	3.29608e-08
ANK2	3.19906	7.56068e-76
GATA6-AS1	3.19297	6.98183e-12
MYRIP	3.19284	0.002708
SLC38A3	3.19262	1.04016e-10
ROR2	3.19152	3.60345e-17
FZD8	3.19145	1.32237e-48
PDLIM3	3.18817	4.45623e-22
LINC02389	3.18807	0.0296717
CRIP3	3.18639	0.00125813
SLC16A10	3.18331	5.61167e-78
LINC02586	3.18178	0.0320637
RPL34-AS1	3.17802	0.0311816
RAC3	3.17148	4.21441e-109
DLL4	3.1689	1.0088e-07
SUGT1P3	3.16852	0.0239741
RCN3	3.16507	2.69466e-07
ZMYND10	3.1609	3.07239e-09
ACADL	3.15858	1.99805e-15
DRD4	3.15827	0.000107755
LONRF3	3.15473	4.5723e-54
LOC105371049	3.15167	1.04347e-10
PAQR6	3.14893	1.05019e-34
CLUL1	3.14503	0.000739129
LINC02021	3.13925	0.0099343
LINC00958	3.13874	1.39201e-07
BCAS1	3.13281	0.00188059
TTC28	3.13149	4.25085e-119
KCNE4	3.12917	0.00560853
COL4A4	3.12607	7.09986e-09
CNN1	3.12584	0.048722
CCM2L	3.12545	0.0487991
ACSL6	3.12331	5.70868e-06
LOC100130370	3.12273	0.00231146
FAM229A	3.12018	9.48371e-55
TRAPPC6A	3.11984	1.73978e-27
NOXO1	3.11838	2.8683e-08
NECTIN3	3.11718	2.79239e-66
ZNF546	3.11518	3.33239e-17
FAHD2CP	3.11386	2.64698e-28
PRSS35	3.1135	2.71485e-05
KRT75	3.10479	0.0316608
LOC51145	3.10344	0.0219246
SNORA80C	3.09887	0.00212304
HRK	3.09722	1.60086e-12
SPTBN4	3.09103	9.82817e-10
APBB1	3.08663	9.6102e-87
FNDC7	3.08406	0.0373199
LOC441204	3.08251	5.02754e-06
MINCR	3.0823	6.20598e-18
TMEM52	3.08185	1.00808e-12
CHRNA3	3.0817	2.26951e-06
SPX	3.08076	1.45379e-07
GNG13	3.08038	2.73375e-06
FOXC2	3.07613	1.18365e-08
TMSB15A	3.07517	9.04855e-16
TPTEP2	3.07464	5.61676e-22
KCNMB4	3.07245	2.2721e-30
SLC9A3	3.06942	4.54732e-12
B4GAT1	3.06607	2.21592e-124
NFATC1	3.06577	3.61027e-28
LOC101928053	3.0615	0.017065
MASP2	3.06038	0.00293458
ARC	3.05723	2.03159e-11
LOC105379028	3.0569	0.000618346
CASKIN1	3.0522	2.10635e-43
THEGL	3.05178	0.00291601
C16orf96	3.04122	0.014538
HYMAI	3.04073	0.00853481
EGLN3	3.03439	9.0212e-46
LINC00937	3.03303	0.00527611
SPTB	3.02925	6.8439e-35
NR2F1-AS1	3.02913	4.00946e-26
NRG2	3.02658	2.24782e-06
EPHA5	3.02176	5.67402e-11
RAET1K	3.0216	7.83969e-09
ZNF589	3.02017	4.55093e-123
CDH15	3.01942	0.0303103
TGFBR3	3.01833	3.81334e-96
MAN1C1	3.01739	2.256e-14
CARMIL3	3.01698	4.27426e-09
FRRS1L	3.01661	8.25006e-20
LINC01719	3.01432	6.63782e-20
AHRR	3.01184	0.00202133
MEIS3	3.0097	5.73847e-08
NR2E1	3.00819	7.89325e-05
DEAF1	3.00645	5.05766e-157
LRRN2	3.00591	1.21355e-06
VASH1	3.00416	1.53126e-85
CRMP1	3.00204	1.63355e-07
DNAH3	2.99796	4.54967e-05
PRRT4	2.99587	3.2443e-12
SMIM2-AS1	2.99057	4.60641e-05
ACVR2B	2.98883	1.28492e-123
PRKAA2	2.98336	3.00375e-144
SCART1	2.97863	6.05822e-10
SPTSSB	2.97578	0.00195808
LOC101929333	2.97571	0.000104324
SEMA5B	2.97536	0.0484587
RPL3L	2.96811	0.0330075
DOC2A	2.96512	2.26277e-36
GREB1	2.96406	3.15865e-55
VPS37D	2.96098	9.24855e-11
KLHDC8A	2.9602	0.0401135
HOPX	2.95601	1.09368e-06
NACA2	2.95573	0.0215049
BEX4	2.95518	4.42858e-74
DENND2A	2.95429	1.29288e-10
ALX3	2.95402	0.00448471
TMEM150C	2.94815	1.01891e-12
PDGFRA	2.94163	0.00868826
GRID2IP	2.93836	9.16762e-06
SCNN1D	2.93448	7.00509e-28
CHKB-DT	2.93284	1.91773e-23
LAG3	2.93262	0.00162335
AGAP11	2.9326	0.00357622
WDR63	2.92755	2.18606e-12
UNC13A	2.92398	0.000198184
CLYBL	2.92218	3.9843e-13
CCER2	2.9218	0.00536384
NBEA	2.92108	5.87196e-48
SFMBT2	2.91962	1.04399e-74
GUCY2D	2.9145	0.0147561
ZBTB8B	2.9145	1.49694e-17
PI4KAP1	2.91394	1.15354e-96
RNF112	2.91287	0.0328305
GRM8	2.90765	0.0073392
ZSCAN16-AS1	2.90634	1.00655e-29
TMEM151A	2.90008	0.0426122
GNG4	2.89892	4.22632e-33
ZBTB46	2.89859	7.76384e-20
SERPINE2	2.89713	3.23811e-25
EDA	2.89192	5.4465e-36
TUBA1A	2.88501	1.55901e-65
C10orf143	2.88492	8.95414e-06
WDR93	2.8843	0.00606052
ATP8B2	2.88176	4.48685e-262
CDIPTOSP	2.88078	0.0187573
ADAMTS4	2.87977	0.0240195
ENPP2	2.87726	1.07428e-12
SHOX2	2.87368	3.16032e-19
EFCAB6	2.8735	9.36595e-05
LOC105375800	2.87274	0.0192616
LOC100506258	2.86873	0.0146553
LINC01252	2.86245	0.000135532
LEPR	2.84526	9.37711e-51
ZCCHC18	2.84313	9.14713e-12
ROBO1	2.83859	3.11659e-132
MAK	2.83727	1.17574e-11
SERPING1	2.83571	0.00210471
GPRC5B	2.82795	1.20851e-39
PRR22	2.82716	1.93761e-13
CCDC106	2.82063	2.35161e-68
NEK5	2.81962	0.000148258
CABLES1	2.81753	2.97502e-87
FHAD1	2.8175	4.71992e-07
HOXA5	2.8168	1.40367e-91
SCML1	2.81339	1.53809e-60
GPR85	2.81229	2.16478e-09
CHGA	2.80437	0.0011017
RADX	2.79715	6.30577e-170
FKBP7	2.79581	4.06698e-47
INTS4P2	2.79548	0.0223017
MAGI2-AS3	2.7934	3.44805e-62
TMEM121	2.79181	2.97467e-16
PPARG	2.79076	2.73324e-36
DNASE1L2	2.79036	3.45393e-06
NSMCE1-DT	2.78904	0.00724869
KIF5A	2.78707	2.4377e-42
RAB9B	2.78703	6.5825e-21
LAMA4	2.78634	3.27156e-31
SIPA1L2	2.7859	4.32999e-39
ZNF493	2.78576	2.57766e-22
ANO4	2.78449	0.00146573
IBA57-DT	2.78372	0.0413197
ZNF775	2.78352	2.11482e-24
SLC9A3-AS1	2.78022	4.41561e-67
STPG3-AS1	2.77781	8.16434e-07
KIF17	2.77162	2.86581e-22
KLRG1	2.76676	1.04915e-11
CLEC11A	2.76523	3.50988e-21
DDIT4L	2.76143	4.36925e-15
SMG1P5	2.76093	2.2367e-13
ABLIM2	2.75865	1.20749e-08
UST	2.75693	1.46746e-85
MIR548AN	2.75639	0.0337852
C16orf86	2.75217	0.00767183
ITGA7	2.75182	1.77718e-44
TEKT2	2.74981	0.0223704
LRRK2	2.74511	7.46666e-12
OVGP1	2.74343	4.07887e-10
TSSK3	2.74258	0.000128087
RBM44	2.74238	0.00676771
NEK10	2.74219	2.92975e-07
MCTP1	2.74047	1.92899e-06
HSD17B14	2.73878	0.00104774
INHBB	2.73635	9.3024e-05
GNB3	2.73614	2.30923e-32
ANKRD63	2.73387	0.00125423
C2orf81	2.72983	0.0079193
SERGEF	2.7284	1.11136e-37
LOC101929536	2.72694	0.00370608
PRR16	2.72397	7.54368e-11
RNF165	2.71901	1.34748e-14
PALM3	2.71701	4.11824e-12
LRRC17	2.70408	2.94068e-05
ZNF503-AS1	2.69681	0.000232904
SERF1A	2.69643	2.60267e-06
PNLDC1	2.69599	0.0148385
LINC00629	2.69528	0.00118219
GOLGA6L10	2.69527	6.03937e-22
FSIP2	2.6914	0.000499348
HLA-DMB	2.6904	4.58964e-05
KLF14	2.68949	0.00528995
LINC01962	2.6885	0.0281287
PAMR1	2.68804	0.00319994
CCDC40	2.67892	2.16259e-25
FYN	2.67665	6.89448e-101
LOC101929140	2.67146	1.22073e-05
TPPP3	2.67101	4.70702e-06
NR4A3	2.6623	4.78608e-10
LOC101929479	2.66148	4.6915e-20
CYP46A1	2.6611	0.00303846
PCDHGC4	2.66046	0.00106442
ADORA2A	2.6582	0.00171401
ALPL	2.65333	2.23135e-08
SLIT3	2.65268	0.000320452
PARVB	2.6515	8.35835e-72
PRPH	2.64888	0.000406743
CD1D	2.64544	0.000448576
COQ8A	2.64509	5.35639e-245
MIR99AHG	2.63091	6.47474e-05
MYCN	2.62981	0.00180986
HCN2	2.6298	6.68385e-27
NTN3	2.6284	0.0483465
CACHD1	2.62824	4.22171e-87
MAP4K1	2.62016	1.53768e-07
PDGFRL	2.61923	2.48456e-08
GIHCG	2.61828	1.39875e-20
NME4	2.61798	3.40007e-152
PGAM2	2.61708	0.0226996
FAM102B	2.61695	2.3168e-100
PARD3B	2.61303	1.21378e-17
KCND2	2.6127	9.55243e-05
TMCC1-AS1	2.61259	1.35133e-30
GHDC	2.61103	1.32306e-51
PANO1	2.60613	3.22601e-05
GNAO1	2.60562	6.81533e-08
LINC00852	2.60345	0.00227668
PLIN2	2.60206	2.3155e-62
GPR162	2.60162	8.8738e-05
CHN1	2.60091	9.62635e-56
AK8	2.59838	3.2757e-06
PITX3	2.59372	0.000384067
PAPPA2	2.59321	0.0352757
LOC101929762	2.59197	0.0343188
RPS6KL1	2.59145	1.84403e-42
NUDT11	2.59071	1.15535e-78
TAF7	2.59021	1.22151e-120
TTC25	2.58934	8.54354e-06
LTBP1	2.58657	3.74595e-57
MORF4L2-AS1	2.58343	6.41586e-11
FRY	2.58055	3.34115e-14
GNG2	2.57916	3.91179e-08
CFAP221	2.57401	2.90696e-05
FOXC1	2.5727	6.88622e-179
IL16	2.56955	0.0141584
PYGM	2.56672	0.00132982
COL21A1	2.5622	0.0285539
ASTN2	2.55533	3.73291e-11
MMP11	2.55315	2.95948e-10
PARP1	2.5477	0
PHGDH	2.5473	4.68773e-121
LOX	2.54413	5.95732e-44
[truncated: 10,707 more rows]
