# Supplementary material for: Single-cell transcriptome analysis defines heterogeneity of the murine pancreatic ductal tree
Source: eLife. 2021 May 19;10:e67776. doi: 10.7554/eLife.67776 (PMC8184217; doi:10.7554/eLife.67776)
Supplement: Figure 6—source data 2. [file elife-67776-fig6-data2.xls]

## Sheet: HPDE SPP1 KO vs scr gRNA
© 2000-2020 QIAGEN. All rights reserved.
Ingenuity Canonical Pathways	-log(p-value)	Ratio	z-score	Molecules
Axonal Guidance Signaling	26.3	0.556	#NUM!	ABLIM1,ABLIM2,ABLIM3,ACTR3,ADAM10,ADAM11,ADAM12,ADAM15,ADAM17,ADAM19,ADAM23,ADAM8,ADAM9,ADAMTS10,ADAMTS13,ADAMTS14,ADAMTS15,ADAMTS17,ADAMTS19,ADAMTS2,ADAMTS20,ADAMTS3,ADAMTS6,ADAMTS9,AKT1,AKT2,AKT3,ARHGEF12,ARHGEF6,ARHGEF7,ARPC1A,ARPC2,ARPC3,ARPC5,ARPC5L,BAIAP2,BCAR1,BDNF,BMP1,BMP2,BMP3,BMP4,BMP6,BMP7,BMP8B,CDK5,CFL1,CHMP1A,CHP1,CXCL12,CXCR4,DPYSL5,ECEL1,EFNA1,EFNA2,EFNA3,EFNB1,EFNB2,EFNB3,EPHA1,…
Molecular Mechanisms of Cancer	21.2	0.555	#NUM!	ADCY1,ADCY3,ADCY6,ADCY7,ADCY9,AKT1,AKT2,AKT3,ARHGEF1,ARHGEF12,ARHGEF16,ARHGEF17,ARHGEF19,ARHGEF4,ARHGEF6,ARHGEF7,ATR,AURKA,AXIN1,BAD,BAK1,BBC3,BCL2L1,BID,BIRC2,BIRC3,BMP1,BMP2,BMP3,BMP4,BMP6,BMP7,BMP8B,BMPR2,CAMK2B,CAMK2G,CASP10,CASP3,CASP6,CASP7,CASP8,CBL,CCND1,CCND3,CCNE2,CDC25A,CDC25B,CDH1,CDK1,CDK12,CDK17,CDK18,CDK2,CDK5,CDK6,CDK7,CDK8,CDKN1B,CDKN2B,CDKN2D,CFLAR,CHEK1,CHEK2,CREBBP,CTNNA1,CTNN…
Ephrin Receptor Signaling	20.2	0.661	-3.286	ABI1,ACTR3,ADAM10,AKT1,AKT2,AKT3,ARPC1A,ARPC2,ARPC3,ARPC5,ARPC5L,ATF4,AXIN1,BCAR1,CFL1,CREB1,CREB3,CREB5,CREBBP,CXCL12,CXCR4,DOK1,EFNA1,EFNA2,EFNA3,EFNB1,EFNB2,EFNB3,EPHA1,EPHA2,EPHA3,EPHA4,EPHA5,EPHA6,EPHA7,EPHA8,EPHB1,EPHB2,EPHB3,EPHB4,FYN,GNA11,GNA12,GNA13,GNA15,GNAI1,GNAI2,GNAI3,GNAO1,GNAZ,GNB1,GNB1L,GNB2,GNB3,GNB4,GNB5,GNG12,GNG2,GNG4,GNG5,GNG7,GRB2,GRIN2C,GRIN2D,GRINA,ITGA2,ITGA3,ITGA4,ITGA…
Senescence Pathway	15.7	0.56	-3.103	ACVR1,ACVR2B,AKT1,AKT2,AKT3,ANAPC13,ANAPC5,ASXL1,ASXL3,ATR,BMPR2,CACNA1C,CALM1 (includes others),CAMK4,CAPN1,CAPN10,CAPN2,CAPN5,CAPNS1,CAT,CBX2,CBX8,CCNB1,CCNB2,CCND1,CDC16,CDC23,CDC25A,CDC25B,CDK1,CDK2,CDK6,CDKN1B,CDKN2B,CEBPB,CGAS,CHEK1,CHEK2,CHP1,CREBBP,CXCL8,DLD,E2F1,E2F2,E2F3,E2F5,E2F7,EIF4EBP1,ELF1,ELF3,ELF4,ELK3,EP300,ETS1,ETS2,FOXO4,FZR1,GADD45A,GADD45B,GATA4,IKBKB,IKBKE,IKBKG,IL1A,IL6,IN…
Hepatic Fibrosis Signaling Pathway	15.5	0.524	-3.096	ACVR1,ACVR2B,AGTR1,AKT1,AKT2,AKT3,ATF4,AXIN1,BAMBI,BMPR2,CACNA1C,CALM1 (includes others),CAMK4,CASP3,CCDC88A,CCN2,CCND1,CDKN1B,CEBPB,COL11A2,COL18A1,COL1A1,COL2A1,COL3A1,CREB1,CREB3,CREB5,CREBBP,CTNNB1,CXCL8,DVL2,DVL3,EDN1,FGF2,FGFR1,FLT1,FLT4,FOXO1,FOXO4,FTH1,FTL,FZD10,FZD2,FZD3,FZD4,FZD5,FZD6,FZD7,FZD8,FZD9,GLI1,GLI2,GLIS1,GNAI1,GNAI2,GNAI3,GSK3B,HIF1A,ICAM1,IKBKB,IKBKE,IKBKG,IL18,IL1A,IL1B,IL1…
Synaptogenesis Signaling Pathway	14.9	0.538	-1.728	ACTR3,ADCY1,ADCY3,ADCY6,ADCY7,ADCY9,AKT1,AKT2,AKT3,AP1G2,AP2A1,AP2A2,AP2B1,AP2M1,AP2S1,ARHGEF7,ARPC1A,ARPC2,ARPC3,ARPC5,ARPC5L,ATF4,BAD,BDNF,BET1L,CACNA1B,CACNA2D1,CACNB3,CACNB4,CADM1,CALM1 (includes others),CAMK2B,CAMK2G,CAMK4,CDH1,CDH10,CDH12,CDH13,CDH2,CDH23,CDH24,CDH3,CDH4,CDH5,CDH8,CDK5,CFL1,CHN1,CLASP2,CNTNAP1,CREB1,CREB3,CREB5,CREBBP,CTNNB1,CTNND1,DAB1,DNAJC5,EFNA1,EFNA2,EFNA3,EFNB1,EFNB2,…
Role of Tissue Factor in Cancer	13.8	0.667	#NUM!	AKT1,AKT2,AKT3,ARRB1,ARRB2,BCL2L1,CASP3,CCN1,CCN2,CFL1,CSF1,CSF2,CXCL1,CXCL8,EGFR,EGR1,F2RL1,F3,FGB,FGF5,FRK,FYN,GNA11,GNA12,GNA13,GNA15,HBEGF,IL1B,ITGA3,ITGA6,ITGAV,ITGB1,ITGB5,JAK2,KRAS,LCK,LIMK1,LIMK2,LYN,MAPK1,MAPK12,MAPK13,MAPK14,MAPK3,MRAS,P4HB,PAK1,PDIA2,PDXP,PIK3C2A,PIK3C2G,PIK3C3,PIK3CA,PIK3CB,PIK3R1,PLAUR,PLCB1,PRKCA,PTEN,PTK2B,PTPN11,RAC1,RALA,RALB,RAP1B,RAP2B,RPS6KA1,RPS6KA4,RPS6KA6,R…
Glioblastoma Multiforme Signaling	12.9	0.6	-0.863	AKT1,AKT2,AKT3,AXIN1,CCND1,CDK2,CDK6,CDKN1B,CTNNB1,E2F1,E2F2,E2F3,E2F5,E2F7,EGFR,FOXO1,FZD10,FZD2,FZD3,FZD4,FZD5,FZD6,FZD7,FZD8,FZD9,GRB2,GSK3B,IGF1R,ITPR1,ITPR3,KRAS,LEF1,MAP2K1,MAP2K2,MAPK1,MAPK3,MRAS,NF1,NF2,PDGFA,PDGFB,PDGFC,PDGFD,PDIA3,PIK3C2A,PIK3C2G,PIK3C3,PIK3CA,PIK3CB,PIK3R1,PLCB1,PLCB3,PLCD3,PLCE1,PLCG2,PLCH1,PLCH2,PLCL1,PLCL2,PRKCD,PTEN,RAC1,RAC2,RAC3,RAF1,RALA,RALB,RAP1B,RAP2B,RB1,RHO…
Wnt/β-catenin Signaling	12.1	0.584	1.646	ACVR1,ACVR2B,AKT1,AKT2,AKT3,APC2,APPL1,AXIN1,AXIN2,BCL9,BMPR2,CCND1,CDH1,CDH12,CDH2,CDH3,CDH5,CREBBP,CSNK1A1,CSNK1E,CSNK1G1,CSNK1G2,CSNK2A1,CSNK2A2,CTNNB1,DKK1,DKK3,DVL2,DVL3,EP300,FZD10,FZD2,FZD3,FZD4,FZD5,FZD6,FZD7,FZD8,FZD9,GNAO1,GSK3B,HDAC1,JUN,KREMEN1,LEF1,LRP1,MAP3K7,MAP4K1,MARK2,NLK,NR5A2,POU5F1,PPARD,PPM1L,PPP2CA,PPP2CB,PPP2R1B,PPP2R2A,PPP2R2B,PPP2R2C,PPP2R3A,PPP2R5D,PPP2R5E,PTPA,RARB,RAR…
Signaling by Rho Family GTPases	11.7	0.537	-4.315	ACTB,ACTG1,ACTR3,ARFIP2,ARHGEF1,ARHGEF12,ARHGEF16,ARHGEF17,ARHGEF19,ARHGEF4,ARHGEF6,ARHGEF7,ARPC1A,ARPC2,ARPC3,ARPC5,ARPC5L,BAIAP2,CDC42EP3,CDC42EP4,CDC42EP5,CDH1,CDH10,CDH12,CDH13,CDH2,CDH23,CDH24,CDH3,CDH4,CDH5,CDH8,CFL1,CLIP1,CYFIP1,DIAPH3,EZR,GNA11,GNA12,GNA13,GNA15,GNAI1,GNAI2,GNAI3,GNAO1,GNAZ,GNB1,GNB1L,GNB2,GNB3,GNB4,GNB5,GNG12,GNG2,GNG4,GNG5,GNG7,IQGAP1,ITGA2,ITGA3,ITGA4,ITGA5,ITGB1,JUN,L…
RhoGDI Signaling	11.5	0.572	3.938	ACTB,ACTG1,ACTR3,ARHGAP1,ARHGAP35,ARHGAP5,ARHGDIA,ARHGDIB,ARHGDIG,ARHGEF1,ARHGEF12,ARHGEF16,ARHGEF17,ARHGEF19,ARHGEF4,ARHGEF6,ARHGEF7,ARPC1A,ARPC2,ARPC3,ARPC5,ARPC5L,CDH1,CDH10,CDH12,CDH13,CDH2,CDH23,CDH24,CDH3,CDH4,CDH5,CDH8,CFL1,CREBBP,EP300,EZR,GNA11,GNA12,GNA13,GNA15,GNAI1,GNAI2,GNAI3,GNAO1,GNAZ,GNB1,GNB1L,GNB2,GNB3,GNB4,GNB5,GNG12,GNG2,GNG4,GNG5,GNG7,ITGA2,ITGA3,ITGA4,ITGA5,ITGB1,LIMK1,LIMK2…
Integrin Signaling	11.4	0.549	-5.051	ACTB,ACTG1,ACTN1,ACTN2,ACTN4,ACTR3,AKT1,AKT2,AKT3,ARF1,ARF3,ARF6,ARHGAP5,ARHGEF7,ARPC1A,ARPC2,ARPC3,ARPC5,ARPC5L,ASAP1,BCAR1,BCAR3,CAPN1,CAPN10,CAPN2,CAPN5,CAPNS1,CAV1,CTTN,FYN,GRB2,GRB7,GSK3B,GSN,ITGA1,ITGA2,ITGA3,ITGA4,ITGA5,ITGA6,ITGA7,ITGA8,ITGA9,ITGAV,ITGB1,ITGB5,ITGB8,KRAS,LIMS1,MAP2K1,MAP2K2,MAP3K11,MAPK1,MAPK3,MAPK8,MPRIP,MRAS,MYL12A,MYL12B,MYL9,NCK1,PAK1,PAK2,PAK3,PAK4,PAK6,PARVA,PARVB,P…
Role of NFAT in Cardiac Hypertrophy	11.2	0.547	-0.396	ADCY1,ADCY3,ADCY6,ADCY7,ADCY9,AKT1,AKT2,AKT3,CABIN1,CACNA1B,CACNA1C,CACNA1G,CACNA1H,CACNA2D1,CACNA2D2,CACNA2D3,CACNB2,CACNB3,CACNB4,CACNG4,CACNG8,CALM1 (includes others),CAMK1,CAMK2B,CAMK2G,CAMK4,CHP1,CSNK1A1,EP300,GATA4,GNAI1,GNAI2,GNAI3,GNB1,GNB1L,GNB2,GNB3,GNB4,GNB5,GNG12,GNG2,GNG4,GNG5,GNG7,GRB2,GSK3B,HAND1,HDAC1,HDAC5,HDAC7,HDAC8,HDAC9,IGF1R,IL11,IL6,IL6ST,ITPR1,ITPR3,KRAS,LIF,MAP2K1,MAP2K2,…
Mouse Embryonic Stem Cell Pluripotency	11.2	0.65	-0.492	AKT1,AKT2,AKT3,AXIN1,BMP4,BMPR2,CREBBP,CTNNB1,DVL2,DVL3,FOXD3,FZD10,FZD2,FZD3,FZD4,FZD5,FZD6,FZD7,FZD8,FZD9,GRB2,GSK3B,ID1,ID3,ID4,IL6ST,JAK2,KRAS,LEF1,LIF,LIFR,MAP2K1,MAP2K2,MAP3K7,MAPK1,MAPK12,MAPK13,MAPK14,MAPK3,MRAS,PIK3C2A,PIK3C2G,PIK3C3,PIK3CA,PIK3CB,PIK3R1,POU5F1,PTPN11,RAF1,RALA,RALB,RAP1B,RAP2B,RRAS,RRAS2,SMAD9,SMO,SOS2,SOX2,STAT3,TAB1,TCF4,TCF7,TCF7L1,TP53,WNT3A,XIAP
Germ Cell-Sertoli Cell Junction Signaling	11.1	0.573	#NUM!	ACTB,ACTG1,ACTN1,ACTN2,ACTN4,AKT1,AXIN1,BCAR1,CDH1,CDH2,CFL1,CTNNA1,CTNNB1,CTNND1,EPN1,EPN3,FER,GSN,IQGAP1,ITGA2,ITGA3,ITGA6,ITGB1,JUP,KEAP1,KRAS,LAMC3,LIMK1,LIMK2,MAP2K1,MAP2K2,MAP3K11,MAP3K14,MAP3K15,MAP3K2,MAP3K6,MAP3K7,MAP3K8,MAP3K9,MAPK1,MAPK12,MAPK14,MAPK3,MAPK8,MRAS,MTMR2,NECTIN3,PAK1,PAK2,PAK3,PAK4,PAK6,PIK3C2A,PIK3C2G,PIK3C3,PIK3CA,PIK3CB,PIK3R1,PLS1,PXN,RAB8B,RAC1,RAC2,RAC3,RALA,RALB,RA…
Estrogen Receptor Signaling	11	0.5	-1.571	ADCY1,ADCY3,ADCY6,ADCY7,ADCY9,AKT1,AKT2,AKT3,ARG2,ATF4,ATP5F1C,ATP5F1D,ATP5F1E,ATP5MC1,ATP5PB,BAD,CACNA1C,CARM1,CAV1,CCNC,CCND1,CDK8,CFL1,CREB1,CREB3,CREB5,CREBBP,CTBP2,CYC1,EGFR,EIF2B1,EIF2B4,EIF4EBP1,EP300,FBXO32,FOXA1,FOXG1,FOXO1,FOXO4,FOXO6,GNA11,GNA12,GNA13,GNA15,GNAI1,GNAI2,GNAI3,GNAO1,GNAZ,GNB1,GNB3,GNG2,GNG5,GNG7,GPER1,GRB2,GSK3B,HIF1A,HNRNPD,HSP90B1,IGF1R,JAK2,JUN,KRAS,LEPR,LIMK1,LIMK2,M…
Cardiac Hypertrophy Signaling (Enhanced)	10.7	0.464	-2.709	ACVR1,ACVR2B,ADCY1,ADCY3,ADCY6,ADCY7,ADCY9,ADRA2C,ADRB2,AGTR1,AKT1,AKT2,AKT3,ATP2A1,ATP2A2,ATP2A3,BMPR2,CACNA1C,CALM1 (includes others),CAMK2B,CAMK2G,CAMK4,CHP1,CLCF1,CSF2,CTNNB1,CXCL8,DIAPH1,DIAPH3,DLG1,DVL2,DVL3,EDA,EDN1,EIF2B1,EIF2B4,EIF4EBP1,EP300,FGF13,FGF2,FGF5,FGF9,FGFR1,FGFR3,FGFR4,FZD10,FZD2,FZD3,FZD4,FZD5,FZD6,FZD7,FZD8,FZD9,GATA4,GDE1,GDPD1,GHR,GNA11,GNA12,GNA13,GNA15,GNAI1,GNAI2,GNAI3…
Colorectal Cancer Metastasis Signaling	10.6	0.522	-1.907	ADCY1,ADCY3,ADCY6,ADCY7,ADCY9,AKT1,AKT2,AKT3,APPL1,ARRB1,AXIN1,BAD,BCL2L1,BIRC5,CASP3,CCND1,CDH1,CTNNB1,EGFR,FZD10,FZD2,FZD3,FZD4,FZD5,FZD6,FZD7,FZD8,FZD9,GNB1,GNB1L,GNB2,GNB3,GNB4,GNB5,GNG12,GNG2,GNG4,GNG5,GNG7,GRB2,GRK2,GRK3,GSK3B,IFNGR1,IL6,IL6ST,JAK2,JUN,KRAS,LEF1,LRP1,MAP2K1,MAP2K2,MAPK1,MAPK12,MAPK3,MAPK8,MLH1,MMP11,MMP14,MMP16,MMP2,MRAS,MSH2,MSH6,NFKB1,NFKB2,NOS2,PDGFC,PIK3C2A,PIK3C2G,PIK3…
CXCR4 Signaling	10.5	0.569	-1.937	ADCY1,ADCY3,ADCY6,ADCY7,ADCY9,AKT1,AKT2,AKT3,BCAR1,CXCL12,CXCR4,EGR1,ELMO1,ELMO2,ELMO3,GNA11,GNA12,GNA13,GNA15,GNAI1,GNAI2,GNAI3,GNAO1,GNAZ,GNB1,GNB1L,GNB2,GNB3,GNB4,GNB5,GNG12,GNG2,GNG4,GNG5,GNG7,ITPR1,ITPR3,JUN,KRAS,LYN,MAP2K1,MAP2K2,MAPK1,MAPK12,MAPK3,MAPK8,MRAS,MYL12A,MYL12B,MYL6,MYL6B,MYL9,PAK1,PAK2,PAK3,PAK4,PAK6,PIK3C2A,PIK3C2G,PIK3C3,PIK3CA,PIK3CB,PIK3R1,PLCB1,PLCB3,PRKCA,PRKCD,PRKCH,PRKC…
PTEN Signaling	10.2	0.603	0.465	AKT1,AKT2,AKT3,BAD,BCAR1,BCL2L1,BMPR2,CASP3,CBL,CCND1,CDKN1B,CNKSR3,CSNK2A1,CSNK2A2,EGFR,FGFR1,FGFR3,FGFR4,FLT1,FLT4,FOXG1,FOXO1,FOXO4,FOXO6,GHR,GRB2,GSK3B,IGF1R,IKBKB,IKBKE,IKBKG,INPP5B,INPP5D,INPP5F,INPP5J,INSR,ITGA2,ITGA3,ITGA4,ITGA5,ITGB1,KRAS,MAGI1,MAGI3,MAP2K1,MAP2K2,MAPK1,MAPK3,MAST2,MRAS,NFKB1,NFKB2,NGFR,NTRK2,PIK3CA,PIK3CB,PIK3R1,PREX2,PTEN,RAC1,RAC2,RAC3,RAF1,RALA,RALB,RAP1B,RAP2B,RPS6K…
Thrombin Signaling	10.2	0.538	-1.309	ADCY1,ADCY3,ADCY6,ADCY7,ADCY9,AKT1,AKT2,AKT3,ARHGEF1,ARHGEF12,ARHGEF16,ARHGEF4,ARHGEF6,CAMK1,CAMK2B,CAMK2G,CAMK4,CREB1,EGFR,GATA2,GATA4,GATA6,GNA11,GNA12,GNA13,GNA15,GNAI1,GNAI2,GNAI3,GNAO1,GNAZ,GNB1,GNB1L,GNB2,GNB3,GNB4,GNB5,GNG12,GNG2,GNG4,GNG5,GNG7,GRB2,IKBKB,ITPR1,ITPR3,KRAS,MAP2K1,MAP2K2,MAPK1,MAPK12,MAPK13,MAPK14,MAPK3,MPRIP,MRAS,MYL12A,MYL12B,MYL6,MYL6B,MYL9,NFKB1,NFKB2,PDIA3,PIK3C2A,PIK3C…
Role of Macrophages, Fibroblasts and Endothelial Cells in Rheumatoid Arthritis	10.2	0.497	#NUM!	AKT1,AKT2,AKT3,APC2,ATF4,AXIN1,CALM1 (includes others),CAMK2B,CAMK2G,CAMK4,CCND1,CEBPB,CEBPD,CHP1,CREB1,CREB3,CREB5,CREBBP,CSF1,CSF2,CSNK1A1,CTNNB1,CXCL12,CXCL8,DAAM1,DKK1,DKK3,F2RL1,FGF2,FN1,FZD10,FZD2,FZD3,FZD4,FZD5,FZD6,FZD7,FZD8,FZD9,GNAO1,GSK3B,ICAM1,IKBKB,IKBKE,IKBKG,IL15,IL17RC,IL18,IL1A,IL1B,IL1R1,IL1RAP,IL1RL1,IL1RL2,IL32,IL36G,IL36RN,IL6,IL6ST,IL7,IRAK1,IRAK3,IRAK4,JAK2,JUN,KRAS,LEF1,LR…
Actin Cytoskeleton Signaling	10.1	0.532	-3.961	ACTB,ACTG1,ACTN1,ACTN2,ACTN4,ACTR3,APC2,ARHGAP24,ARHGAP35,ARHGEF1,ARHGEF12,ARHGEF4,ARHGEF6,ARHGEF7,ARPC1A,ARPC2,ARPC3,ARPC5,ARPC5L,BAIAP2,BCAR1,BRK1,CD14,CFL1,CYFIP1,CYFIP2,DIAPH1,DIAPH3,EZR,FGD1,FGF13,FGF2,FGF5,FGF9,FLNA,FN1,GNA12,GNA13,GNG12,GRB2,GSN,IQGAP1,IQGAP2,IQGAP3,ITGA2,ITGA3,ITGA4,ITGA5,ITGB1,KRAS,LIMK1,LIMK2,MAP2K1,MAP2K2,MAPK1,MAPK3,MATK,MPRIP,MRAS,MSN,MYH10,MYH3,MYH9,MYL12A,MYL12B,MY…
Cardiac Hypertrophy Signaling	10	0.521	-1.943	ADCY1,ADCY3,ADCY6,ADCY7,ADCY9,ADRA2C,ADRB2,AKT1,CACNA1C,CALM1 (includes others),CAMK4,CHP1,CREB1,CREBBP,EIF2B1,EIF2B4,EP300,GATA4,GNA11,GNA12,GNA13,GNA15,GNAI1,GNAI2,GNAI3,GNAO1,GNAZ,GNB1,GNB1L,GNB2,GNB3,GNB4,GNB5,GNG12,GNG2,GNG4,GNG5,GNG7,GRB2,GSK3B,HAND1,HAND2,HSPB1,IGF1R,IL6,IRS1,JUN,KRAS,MAP2K1,MAP2K2,MAP3K11,MAP3K14,MAP3K15,MAP3K2,MAP3K6,MAP3K7,MAP3K8,MAP3K9,MAPK1,MAPK12,MAPK13,MAPK14,MAPK3,…
Opioid Signaling Pathway	9.69	0.514	0.539	ADCY1,ADCY3,ADCY6,ADCY7,ADCY9,AKT1,AKT2,AKT3,AP1G2,AP2A1,AP2A2,AP2B1,AP2M1,AP2S1,ARRB1,ARRB2,ATF4,BAD,CACNA1B,CACNA1C,CACNA1G,CACNA1H,CACNA2D1,CACNA2D2,CACNA2D3,CACNB2,CACNB3,CACNB4,CACNG4,CACNG8,CALM1 (includes others),CAMK1,CAMK2B,CAMK2G,CAMK4,CDKN1B,CLTB,CLTC,CLTCL1,CREB1,CREB3,CREB5,CREBBP,CTNNB1,EP300,FRK,FYN,GNAI1,GNAI2,GNAI3,GNAO1,GNB1,GNB3,GNG2,GNG5,GNG7,GRIN2C,GRIN2D,GRINA,GRK2,GRK3,GRK4…
IL-8 Signaling	9.56	0.535	-3.062	AKT1,AKT2,AKT3,ARRB2,BCL2L1,CCND1,CCND3,CDH1,CXCL1,CXCL8,EGFR,EIF4EBP1,FLT1,FLT4,GNA12,GNA13,GNAI1,GNAI2,GNAI3,GNB1,GNB1L,GNB2,GNB3,GNB4,GNB5,GNG12,GNG2,GNG4,GNG5,GNG7,GPLD1,HBEGF,HMOX1,ICAM1,IKBKB,IKBKE,IKBKG,IQGAP1,IRAK1,IRAK3,IRAK4,ITGAV,ITGB5,JUN,KRAS,LASP1,LIMK1,LIMK2,MAP2K1,MAP2K2,MAP4K4,MAPK1,MAPK12,MAPK3,MAPK8,MMP2,MRAS,MYL12B,MYL9,NCF2,NFKB1,PAK2,PDGFC,PIK3C2A,PIK3C2G,PIK3C3,PIK3CA,PIK3C…
p70S6K Signaling	9.51	0.589	-0.956	AGTR1,AKT1,AKT2,AKT3,BAD,BCAP31,CD19,EEF2,EEF2K,EGFR,F2RL1,GNAI1,GNAI2,GNAI3,GRB2,IL4R,IRS1,KRAS,LYN,MAP2K1,MAP2K2,MAPK1,MAPK3,MAPT,MRAS,PDIA3,PIK3C2A,PIK3C2G,PIK3C3,PIK3CA,PIK3CB,PIK3R1,PLCB1,PLCB3,PLCD3,PLCE1,PLCG2,PLCH1,PLCH2,PLCL1,PLCL2,PPM1L,PPP2CA,PPP2CB,PPP2R1B,PPP2R2A,PPP2R2B,PPP2R2C,PPP2R3A,PPP2R5D,PPP2R5E,PRKCA,PRKCD,PRKCH,PRKCI,PRKD1,PRKD3,PTPA,RAF1,RALA,RALB,RAP1B,RAP2B,RPS6,RPS6KB1,R…
ILK Signaling	9.25	0.537	-1.279	ACTB,ACTG1,ACTN1,ACTN2,ACTN4,AKT1,AKT2,AKT3,ARHGEF6,ATF4,BMP2,CASP3,CCND1,CDH1,CFL1,CREB1,CREB3,CREB5,CREBBP,CTNNB1,DSP,FBLIM1,FERMT2,FLNA,FLNB,FLNC,FN1,GSK3B,HIF1A,IRS1,IRS2,ITGB1,ITGB5,ITGB8,JUN,KRT18,LEF1,LIMS1,MAPK1,MAPK12,MAPK3,MAPK8,MYH10,MYH3,MYH9,MYL6,MYL6B,MYL9,NACA,NFKB1,NFKB2,NOS2,PARVA,PARVB,PDGFC,PIK3C2A,PIK3C2G,PIK3C3,PIK3CA,PIK3CB,PIK3R1,PPM1L,PPP1R12A,PPP2CA,PPP2CB,PPP2R1B,PPP2R2A…
p53 Signaling	9.09	0.622	-0.146	ADGRB1,AKT1,AKT2,AKT3,ATR,BBC3,BCL2L1,BIRC5,CASP6,CCND1,CCNG1,CDK2,CHEK1,CHEK2,COQ8A,CTNNB1,DRAM1,E2F1,EP300,FAS,GADD45A,GADD45B,GNL3,GSK3B,HDAC1,HDAC9,HIF1A,JUN,MAPK14,MAPK8,MDM4,PERP,PIDD1,PIK3C2A,PIK3C2G,PIK3C3,PIK3CA,PIK3CB,PIK3R1,PLAGL1,PMAIP1,PML,PPP1R13B,PRKDC,PTEN,RB1,RPRM,SCO2,SERPINE2,SIRT1,SNAI2,ST13,STAG1,TNFRSF10A,TP53,TP53BP2,TP53I3,TP53INP1,TP73,TRIM29,WT1
Protein Kinase A Signaling	8.94	0.465	1.374	ADCY1,ADCY3,ADCY6,ADCY7,ADCY9,ADD1,ADD2,AKAP1,AKAP9,ANAPC13,ANAPC5,ATF4,BAD,CALM1 (includes others),CAMK2B,CAMK2G,CAMK4,CDC14B,CDC16,CDC23,CDC25A,CDC25B,CDKN3,CHP1,CNGA1,CREB1,CREB3,CREB5,CREBBP,CTNNB1,DUSP1,DUSP10,DUSP11,DUSP15,DUSP16,DUSP22,DUSP4,DUSP5,DUSP6,DUSP8,DUSP9,EYA1,EYA2,EYA3,FLNA,FLNB,FLNC,GDE1,GDPD1,GNA13,GNAI1,GNAI2,GNAI3,GNB1,GNB1L,GNB2,GNB3,GNB4,GNB5,GNG12,GNG2,GNG4,GNG5,GNG7,GSK3…
Regulation of eIF4 and p70S6K Signaling	8.9	0.554	-1.372	AKT1,AKT2,AKT3,EIF1,EIF2B1,EIF2B4,EIF2S1,EIF2S2,EIF3C,EIF3D,EIF3F,EIF3G,EIF3H,EIF3I,EIF3L,EIF3M,EIF4A2,EIF4EBP1,EIF4G3,FAU,GRB2,IRS1,ITGA2,ITGA3,ITGA4,ITGA5,ITGB1,KRAS,MAP2K1,MAP2K2,MAPK1,MAPK12,MAPK13,MAPK14,MAPK3,MKNK1,MRAS,PABPC1,PAIP1,PAIP2,PIK3C2A,PIK3C2G,PIK3C3,PIK3CA,PIK3CB,PIK3R1,PPM1L,PPP2CA,PPP2CB,PPP2R1B,PPP2R2A,PPP2R2B,PPP2R2C,PPP2R3A,PPP2R5D,PPP2R5E,PTPA,RAF1,RALA,RALB,RAP1B,RAP2B,RP…
Ephrin B Signaling	8.74	0.667	-1.183	ABI1,AXIN1,CAP1,CBL,CFL1,CTNNB1,CXCL12,CXCR4,EFNB1,EFNB2,EFNB3,EPHB1,EPHB2,EPHB3,EPHB4,GNA11,GNA12,GNA13,GNA15,GNAI1,GNAI2,GNAI3,GNAO1,GNAZ,GNB1,GNB1L,GNB2,GNB3,GNB4,GNB5,GNG12,GNG2,GNG4,GNG5,GNG7,ITSN2,LIMK1,MAPK1,MAPK3,MRAS,PAK1,PXN,RAC1,RAC2,RAC3,RGS3,RHOA,VAV2
mTOR Signaling	8.72	0.519	0.717	AKT1,AKT2,AKT3,ATG13,EIF3C,EIF3D,EIF3F,EIF3G,EIF3H,EIF3I,EIF3L,EIF3M,EIF4A2,EIF4B,EIF4EBP1,EIF4G3,FAU,FKBP1A,GNB1L,GPLD1,HIF1A,HMOX1,INSR,IRS1,KRAS,MAPK1,MAPK3,MLST8,MRAS,PDGFC,PIK3C2A,PIK3C2G,PIK3C3,PIK3CA,PIK3CB,PIK3R1,PLD2,PLD6,PPM1L,PPP2CA,PPP2CB,PPP2R1B,PPP2R2A,PPP2R2B,PPP2R2C,PPP2R3A,PPP2R5D,PPP2R5E,PRKAA1,PRKAA2,PRKAG2,PRKCA,PRKCD,PRKCH,PRKCI,PRKD1,PRKD3,PRR5,PTPA,RAC1,RAC2,RAC3,RALA,RALB,…
IGF-1 Signaling	8.68	0.606	-2.021	AKT1,AKT2,AKT3,BAD,CCN1,CCN2,CSNK2A1,CSNK2A2,FOXO1,GRB10,GRB2,IGF1R,IGFBP2,IGFBP3,IGFBP4,IGFBP5,IGFBP6,IGFBP7,IRS1,IRS2,JAK2,JUN,KRAS,MAP2K1,MAP2K2,MAPK1,MAPK3,MAPK8,MRAS,NEDD4,PIK3C2A,PIK3C2G,PIK3C3,PIK3CA,PIK3CB,PIK3R1,PRKAG2,PRKAR1A,PRKAR2A,PRKAR2B,PRKCI,PTPN11,PXN,RAF1,RALA,RALB,RAP1B,RAP2B,RASA1,RPS6KB1,RRAS,RRAS2,SHC1,SOCS2,SOCS3,SOCS6,SOS2,STAT3,YWHAB,YWHAE,YWHAG,YWHAQ,YWHAZ
Role of Osteoblasts, Osteoclasts and Chondrocytes in Rheumatoid Arthritis	8.67	0.514	#NUM!	ACP5,ADAM17,AKT1,AKT2,AKT3,ALPL,APC2,AXIN1,BAD,BIRC2,BIRC3,BMP1,BMP2,BMP3,BMP4,BMP6,BMP7,BMP8B,BMPR2,CALM1 (includes others),CAMK4,CBL,CHP1,COL1A1,CSF1,CSF1R,CSF2,CSNK1A1,CTNNB1,DKK1,DKK3,DLX5,FOXO1,FZD10,FZD2,FZD3,FZD4,FZD5,FZD6,FZD7,FZD8,FZD9,GSK3B,GSN,IKBKB,IKBKE,IKBKG,IL11,IL18,IL1A,IL1B,IL1R1,IL1RAP,IL1RL1,IL1RL2,IL36G,IL36RN,IL6,IL7,ITGA2,ITGA3,ITGA5,ITGB1,JUN,LEF1,LRP1,MAP3K14,MAP3K7,MAPK1…
PI3K/AKT Signaling	8.6	0.537	-2.869	AKT1,AKT2,AKT3,BAD,BCL2L1,CCND1,CDKN1B,CTNNB1,EIF4EBP1,FOXO1,GDF15,GHR,GRB2,GSK3B,HSP90B1,IFNLR1,IKBKB,IKBKE,IKBKG,IL12RB2,IL13RA1,IL15RA,IL17RC,IL17RD,IL17RE,IL1R1,IL1RL1,IL1RL2,IL20RA,IL20RB,IL22RA1,IL31RA,IL4R,IL6ST,IL7R,INPP5B,INPP5D,INPP5F,INPP5J,ITGA2,ITGA3,ITGA4,ITGA5,ITGB1,JAK2,KRAS,LIMS1,MAP2K1,MAP2K2,MAP3K8,MAPK1,MAPK3,MCL1,MRAS,NFKB1,NFKB2,NFKBIA,NFKBID,NFKBIE,PIK3CA,PIK3CB,PIK3R1,PPM1…
GNRH Signaling	8.54	0.538	-2.813	ADCY1,ADCY3,ADCY6,ADCY7,ADCY9,ATF4,CACNA1B,CACNA1C,CACNA1G,CACNA1H,CACNA2D1,CACNA2D2,CACNA2D3,CACNB2,CACNB3,CACNB4,CACNG4,CACNG8,CALM1 (includes others),CAMK2B,CAMK2G,CAMK4,CREB1,CREB3,CREB5,CREBBP,EGFR,EGR1,GNA11,GNA15,GNAI1,GNAI2,GNAI3,GNB1,GNB3,GNG2,GNG5,GNG7,GRB2,HBEGF,ITPR1,ITPR3,JUN,KRAS,MAP2K1,MAP2K2,MAP3K11,MAP3K14,MAP3K15,MAP3K2,MAP3K6,MAP3K7,MAP3K8,MAP3K9,MAPK1,MAPK12,MAPK13,MAPK14,MAPK…
Sertoli Cell-Sertoli Cell Junction Signaling	8.51	0.53	#NUM!	ACTB,ACTG1,ACTN1,ACTN2,ACTN4,AKT1,AKT2,AKT3,AXIN1,BCAR1,CDH1,CGN,CLDN1,CLDN11,CLDN12,CLDN15,CLDN16,CLDN23,CLDN4,CLDN7,CTNNA1,CTNNB1,DLG1,EPB41,EPN1,EPN3,F11R,GSK3B,GUCY1A1,GUCY1A2,GUCY1B1,ITGA2,ITGA3,ITGA4,ITGA5,ITGB1,JAM2,JAM3,JUN,JUP,KEAP1,KRAS,MAP2K1,MAP2K2,MAP3K11,MAP3K14,MAP3K15,MAP3K2,MAP3K20,MAP3K6,MAP3K7,MAP3K8,MAP3K9,MAPK1,MAPK12,MAPK13,MAPK14,MAPK3,MAPK8,MPP6,MRAS,MTMR2,NECTIN1,NECTIN3,…
P2Y Purigenic Receptor Signaling Pathway	8.51	0.575	-0.122	ADCY1,ADCY3,ADCY6,ADCY7,ADCY9,AKT1,AKT2,AKT3,ATF4,CREB1,CREB3,CREB5,CREBBP,GNAI1,GNAI2,GNAI3,GNB1,GNB1L,GNB2,GNB3,GNB4,GNB5,GNG12,GNG2,GNG4,GNG5,GNG7,JUN,KRAS,MAP2K1,MAP2K2,MAPK1,MAPK3,MRAS,NFKB1,NFKB2,P2RY1,P2RY11,P2RY2,P2RY6,PDIA3,PIK3C2A,PIK3C2G,PIK3C3,PIK3CA,PIK3CB,PIK3R1,PLCB1,PLCB3,PLCD3,PLCE1,PLCG2,PLCH1,PLCH2,PLCL1,PLCL2,PRKAG2,PRKAR1A,PRKAR2A,PRKAR2B,PRKCA,PRKCD,PRKCH,PRKCI,PRKD1,PRKD3,R…
Protein Ubiquitination Pathway	8.47	0.491	#NUM!	ANAPC5,B2M,BAG1,BAP1,BIRC2,BIRC3,CBL,CDC23,CDC34,CUL1,DNAJB11,DNAJB12,DNAJB14,DNAJB2,DNAJB9,DNAJC12,DNAJC13,DNAJC15,DNAJC2,DNAJC22,DNAJC24,DNAJC3,DNAJC5,DNAJC6,DNAJC7,DNAJC8,DNAJC9,ELOB,ELOC,FBXW7,FZR1,HLA-A,HLA-B,HLA-C,HLA-E,HSCB,HSP90B1,HSPA12A,HSPA14,HSPA1A/HSPA1B,HSPA4,HSPA4L,HSPA5,HSPA8,HSPB1,HSPB8,HSPD1,HSPH1,NEDD4,NEDD4L,PSMA7,PSMB10,PSMB2,PSMB3,PSMB7,PSMB8,PSMB9,PSMC1,PSMC2,PSMC3,PSMC4,PS…
Adipogenesis pathway	8.47	0.567	#NUM!	AKT1,ATG5,BMP2,BMP4,BMP7,BMPR2,CDK5,CDK7,CEBPB,CEBPD,CLOCK,CTBP2,CTNNB1,EBF1,FBXW7,FGF2,FGFR1,FGFR3,FGFR4,FOXC2,FOXO1,FZD10,FZD2,FZD3,FZD4,FZD5,FZD6,FZD7,FZD8,FZD9,GTF2H2,GTF2H5,HDAC1,HDAC5,HDAC7,HDAC8,HDAC9,HIF1A,KAT2A,KAT6A,KDM1A,KLF3,KLF5,LPL,NFATC4,NOCT,NR2F2,PAXIP1,PPARG,PPIP5K1,RB1,RBBP4,RBBP7,RPS6KA1,RPS6KB1,RUNX1T1,SAP130,SAP18,SETDB1,SIN3A,SIRT1,SLC2A4,SMAD3,SMAD9,SMO,SOX9,TBL1XR1,TCF7,T…
ERK/MAPK Signaling	8.38	0.523	-1.539	ATF4,BAD,BCAR1,CREB1,CREB3,CREB5,CREBBP,DUSP1,DUSP4,DUSP6,DUSP9,EIF4EBP1,ELF1,ELF3,ELF4,ELK3,ETS1,ETS2,FYN,GRB2,H3-3A/H3-3B,HSPB1,ITGA2,ITGA3,ITGA4,ITGA5,ITGB1,KRAS,MAP2K1,MAP2K2,MAPK1,MAPK3,MKNK1,MRAS,NFATC1,PAK1,PAK2,PAK3,PAK4,PAK6,PIK3C2A,PIK3C2G,PIK3C3,PIK3CA,PIK3CB,PIK3R1,PLA2G4A,PLA2G6,PLCG2,PPARG,PPM1L,PPP1CA,PPP1CB,PPP1CC,PPP1R12A,PPP1R14A,PPP1R3D,PPP2CA,PPP2CB,PPP2R1B,PPP2R2A,PPP2R2B,PPP…
Rac Signaling	8.36	0.589	-3.597	ACTR3,ARFIP2,ARPC1A,ARPC2,ARPC3,ARPC5,ARPC5L,BAIAP2,BRK1,CFL1,CYFIP1,CYFIP2,ELK4,IQGAP1,IQGAP2,IQGAP3,ITGA2,ITGA3,ITGA4,ITGA5,ITGB1,JUN,KRAS,LIMK1,LIMK2,MAP2K1,MAP2K2,MAP3K11,MAPK1,MAPK3,MAPK8,MCF2L,MRAS,NCF2,NCKAP1,NFKB1,NFKB2,PAK1,PAK2,PAK3,PAK4,PAK6,PI4KA,PIK3C2A,PIK3C2G,PIK3C3,PIK3CA,PIK3CB,PIK3R1,PIP4K2B,PIP4K2C,PIP5K1B,PRKCI,PTK2B,RAC1,RAF1,RALA,RALB,RAP1B,RAP2B,RHOA,RPS6KB1,RRAS,RRAS2,SH3R…
Huntington's Disease Signaling	8.33	0.502	-0.124	AKT1,AKT2,AKT3,AP2A2,ARFIP2,ATF4,ATP5F1B,ATP5F1C,ATP5F1D,ATP5F1E,ATP5MC1,ATP5PB,ATP5PF,BCL2L1,BDNF,BET1L,CACNA1B,CAPN1,CAPN10,CAPN2,CAPN5,CAPNS1,CASP1,CASP10,CASP3,CASP4,CASP6,CASP7,CASP8,CDK5,CLTB,CLTC,CLTCL1,CREB1,CREB3,CREB5,CREBBP,CTSD,CYCS,DNAJC5,DNM1,DYNC1I2,EGFR,EP300,GNA11,GNA15,GNB1,GNB1L,GNB2,GNB3,GNB4,GNB5,GNG12,GNG2,GNG4,GNG5,GNG7,GOSR1,GOSR2,GRB2,HDAC1,HDAC5,HDAC7,HDAC8,HDAC9,HIP1,HS…
PEDF Signaling	8.26	0.634	-1.571	AKT1,AKT2,AKT3,BCL2L1,BDNF,CASP7,CASP8,CFLAR,DOCK3,FAS,GDNF,HNF1B,IKBKB,IKBKE,IKBKG,KRAS,MAPK1,MAPK12,MAPK13,MAPK14,MAPK3,MRAS,NFKB1,NFKB2,NFKBIA,NFKBID,NFKBIE,PIK3C2A,PIK3C2G,PIK3C3,PIK3CA,PIK3CB,PIK3R1,PNPLA2,PPARG,RAC1,RAF1,RALA,RALB,RAP1B,RAP2B,RHOA,RRAS,RRAS2,SOD2,TCF12,TCF4,TCF7,TCF7L1,TP53,WASF2,ZEB1
PPAR Signaling	8.17	0.596	4.481	AIP,CREBBP,EP300,GRB2,HSP90B1,IKBKB,IKBKE,IKBKG,IL18,IL1A,IL1B,IL1R1,IL1RAP,IL1RL1,IL1RL2,IL36G,IL36RN,INSR,JUN,KRAS,MAP2K1,MAP2K2,MAP3K14,MAP3K7,MAP4K4,MAPK1,MAPK3,MRAS,NCOR2,NFKB1,NFKB2,NFKBIA,NFKBID,NFKBIE,NGFR,NR1H3,NR2F1,NRIP1,PDGFA,PDGFB,PDGFC,PDGFD,PPARA,PPARD,PPARG,PPARGC1A,PTGS2,RAF1,RALA,RALB,RAP1B,RAP2B,RRAS,RRAS2,RXRA,SHC1,SNW1,SOS2,SRA1,STAT5A,TAB1,TNFRSF1A
Reelin Signaling in Neurons	8.1	0.566	-1.912	ACTR3,AKT1,AKT2,AKT3,APBB1,APP,ARHGEF1,ARHGEF12,ARHGEF16,ARHGEF4,ARHGEF6,ARPC1A,ARPC2,ARPC3,ARPC5,ARPC5L,CAMK2B,CAMK2G,CDH2,CDK5,CFL1,DAB1,FRK,FYN,GRIN2C,GRIN2D,GRINA,GSK3B,ITGA1,ITGA2,ITGA3,ITGA4,ITGA5,ITGA6,ITGB1,LCK,LIMK1,LRP8,LYN,MAP1B,MAP2K1,MAP2K2,MAP3K11,MAP3K9,MAP4K1,MAPK1,MAPK12,MAPK3,MAPK8,MAPK8IP2,MAPK8IP3,MAPT,NDEL1,NECTIN3,PAFAH1B1,PAFAH1B2,PAFAH1B3,PDK1,PDK3,PDK4,PIK3C2A,PIK3C2G,PIK…
Neuregulin Signaling	7.98	0.604	-1.697	ADAM17,AKT1,AKT2,AKT3,AREG,BAD,BTC,CDK5,CDKN1B,EGFR,ERBB2,ERBB3,ERBB4,ERBIN,ERRFI1,GRB2,GRB7,HBEGF,HSP90B1,ITGA2,ITGA3,ITGA4,ITGA5,ITGB1,KRAS,MAP2K1,MAP2K2,MAPK1,MAPK3,MATK,MRAS,NRG4,PICK1,PIK3R1,PLCG2,PRKCA,PRKCD,PRKCH,PRKCI,PRKD1,PRKD3,PSEN1,PTEN,PTPN11,RAF1,RALA,RALB,RAP1B,RAP2B,RPS6,RPS6KB1,RRAS,RRAS2,SHC1,SOS2,SRC,STAT5A,TGFA
Superpathway of Inositol Phosphate Compounds	7.98	0.515	-0.2	ACP5,ALPL,CDC25A,CDC25B,CDIPT,DOT1L,DUSP1,DUSP10,DUSP11,DUSP14,DUSP15,DUSP16,DUSP23,DUSP5,DUSP8,FIG4,HACD2,INPP5B,INPP5D,INPP5E,INPP5F,INPP5J,IP6K1,IP6K2,IPPK,ITPKB,ITPKC,MTMR2,MTMR4,MTMR7,NOCT,NUDT11,NUDT16,NUDT3,NUDT5,PALD1,PAWR,PDXP,PGAM5,PI4K2A,PI4K2B,PI4KA,PI4KB,PIK3C2A,PIK3C2G,PIK3C3,PIK3CA,PIK3CB,PIK3R1,PIP4K2A,PIP4K2B,PIP4K2C,PIP4P2,PIP5K1B,PLCB1,PLCB3,PLCD3,PLCE1,PLCG2,PLCH1,PLPP7,PPFIA2…
Role of NANOG in Mammalian Embryonic Stem Cell Pluripotency	7.83	0.571	-2.333	AKT1,AKT2,AKT3,AXIN1,BMP1,BMP2,BMP3,BMP4,BMP6,BMP7,BMP8B,BMPR2,CDX2,CTNNB1,FOXD3,FZD10,FZD2,FZD3,FZD4,FZD5,FZD6,FZD7,FZD8,FZD9,GATA4,GATA6,GRB2,GSK3B,IL6ST,JAK2,KRAS,LIF,LIFR,MAP2K1,MAP2K2,MAPK1,MAPK3,MRAS,PIK3C2A,PIK3C2G,PIK3C3,PIK3CA,PIK3CB,PIK3R1,POU5F1,RAF1,RALA,RALB,RAP1B,RAP2B,RRAS,RRAS2,SHC1,SMAD9,SMO,SOS2,SOX2,STAT3,TCF7L1,TP53,WNT10B,WNT11,WNT3,WNT3A,WNT4,WNT5A,WNT7B,WNT9A
AMPK Signaling	7.77	0.505	-0.57	ACACB,ACTB,ADRA2C,ADRB2,AK2,AK3,AK5,AK7,AK9,AKT1,AKT2,AKT3,ATF4,CAB39,CAMKK2,CCND1,CHRM3,CHRNA5,CHRNA7,CHRNB1,CPT1A,CPT1C,CPT2,CREB1,CREB3,CREB5,CREBBP,DPF1,EEF2,EEF2K,EIF4EBP1,ELAVL1,EP300,FOXG1,FOXO1,FOXO4,FOXO6,GNB1L,INSR,IRS1,IRS2,LIPE,MAP3K7,MAPK1,MAPK12,MAPK13,MAPK14,MLST8,MRAS,ORAI1,ORAI2,PBRM1,PFKFB2,PFKFB3,PFKP,PHF10,PIK3C2A,PIK3C2G,PIK3C3,PIK3CA,PIK3CB,PIK3R1,PPARGC1A,PPAT,PPM1D,PPM1E,P…
Insulin Receptor Signaling	7.76	0.55	-0.471	ACLY,AKT1,AKT2,AKT3,ASIC1,ASIC3,BAD,CBL,EIF2B1,EIF2B4,EIF4EBP1,FOXO1,FOXO4,FYN,GRB10,GRB2,GSK3B,INPP5B,INPP5D,INPP5F,INPP5J,INSR,IRS1,IRS2,JAK2,KRAS,LIPE,MAP2K1,MAP2K2,MAPK1,MAPK3,MAPK8,MRAS,NCK1,PDE3B,PIK3C2A,PIK3C2G,PIK3C3,PIK3CA,PIK3CB,PIK3R1,PPP1CA,PPP1CB,PPP1CC,PPP1R12A,PPP1R14A,PPP1R3D,PRKAG2,PRKAR1A,PRKAR2A,PRKAR2B,PRKCI,PTEN,PTPN1,PTPN11,PTPRF,RAF1,RALA,RALB,RAP1B,RAP2B,RHOQ,RPS6KB1,RRAS,…
PAK Signaling	7.75	0.598	-4.543	ARHGAP10,ARHGEF6,ARHGEF7,CASP3,CFL1,DSCAM,EPHA3,EPHB3,GRB2,ITGA2,ITGA3,ITGA4,ITGA5,ITGB1,KRAS,LIMK1,LIMK2,MAP2K1,MAP2K2,MAPK1,MAPK12,MAPK3,MAPK8,MRAS,MYL12A,MYL12B,MYL6,MYL6B,MYL9,NCK1,PAK1,PAK2,PAK3,PAK4,PAK6,PDGFA,PDGFB,PDGFC,PDGFD,PIK3C2A,PIK3C2G,PIK3C3,PIK3CA,PIK3CB,PIK3R1,PTK2B,PXN,RAC1,RAF1,RALA,RALB,RAP1B,RAP2B,RRAS,RRAS2,SHC1,SOS2,WASL
PPARα/RXRα Activation	7.73	0.516	2.778	ABCA1,ACADL,ACOX1,ACVR1,ACVR2B,ADCY1,ADCY3,ADCY6,ADCY7,ADCY9,ADIPOR1,ADIPOR2,AIP,AP2A2,BCL3,BMPR2,CKAP5,CLOCK,CREBBP,EP300,GHR,GK,GNA11,GNA15,GPD2,GRB2,HELZ2,HSP90B1,IKBKB,IKBKE,IKBKG,IL1B,IL1R1,IL1RAP,IL1RL1,IL1RL2,IL6,INSR,IRS1,ITGB5,JAK2,JUN,KRAS,LPL,MAP2K1,MAP2K2,MAP3K14,MAP3K7,MAP4K4,MAPK1,MAPK14,MAPK3,MAPK8,MEF2C,MRAS,NCOA3,NCOR2,NFKB1,NFKB2,NFKBIA,NFKBID,NFKBIE,NR2F1,PDIA3,PLCB1,PLCB3,PLCD…
Endocannabinoid Developing Neuron Pathway	7.72	0.574	-0.508	ADCY1,ADCY3,ADCY6,ADCY7,ADCY9,AKT1,AKT2,AKT3,ATF4,CCND1,CDKN1B,CREB1,CREB3,CREB5,CREBBP,CTNNB1,GNAI1,GNAI2,GNAI3,GNAO1,GNB1,GNB1L,GNB3,GNG2,GNG5,GNG7,GSK3B,KRAS,MAP2K1,MAP2K2,MAPK1,MAPK12,MAPK13,MAPK14,MAPK15,MAPK3,MAPK4,MAPK6,MAPK8,MGLL,MLST8,MRAS,PAX6,PIK3C2A,PIK3C2G,PIK3C3,PIK3CA,PIK3CB,PIK3R1,PRKAG2,PRKAR1A,PRKAR2A,PRKAR2B,RAC1,RAC2,RAC3,RAF1,RALA,RALB,RAP1B,RAP2B,RHOA,RRAS,RRAS2,SRC,STAT3
Renal Cell Carcinoma Signaling	7.66	0.625	-3.087	AKT1,AKT2,AKT3,ARNT,CREBBP,EGLN3,ELOB,ELOC,EP300,ETS1,GRB2,HIF1A,JUN,KRAS,MAP2K1,MAP2K2,MAPK1,MAPK3,MET,MRAS,PAK1,PAK2,PAK3,PAK4,PAK6,PDGFB,PIK3C2A,PIK3C2G,PIK3C3,PIK3CA,PIK3CB,PIK3R1,PTPN11,RAC1,RAF1,RALA,RALB,RAP1B,RAP2B,RBX1,RRAS,RRAS2,SLC2A1,SOS2,TGFA,TGFB1,UBB,UBC,VEGFA,VHL
IL-1 Signaling	7.61	0.604	-2.191	ADCY1,ADCY3,ADCY6,ADCY7,ADCY9,ECSIT,GNA11,GNA12,GNA13,GNA15,GNAI1,GNAI2,GNAI3,GNAO1,GNAZ,GNB1,GNB1L,GNB2,GNB3,GNB4,GNB5,GNG12,GNG2,GNG4,GNG5,GNG7,IKBKB,IKBKE,IKBKG,IL1A,IL1R1,IL1RAP,IRAK1,IRAK3,IRAK4,JUN,MAP3K14,MAP3K7,MAPK1,MAPK12,MAPK13,MAPK14,MAPK8,MRAS,MYD88,NFKB1,NFKB2,NFKBIA,NFKBID,NFKBIE,PRKAG2,PRKAR1A,PRKAR2A,PRKAR2B,TAB1
Pancreatic Adenocarcinoma Signaling	7.56	0.578	-2.48	AKT1,AKT2,AKT3,BAD,BCL2L1,BIRC5,BRCA2,CCND1,CDK2,CDKN1B,CDKN2B,E2F1,E2F2,E2F3,E2F5,E2F7,EGFR,ERBB2,GPLD1,GRB2,HBEGF,HMOX1,JAK2,KRAS,MAP2K1,MAP2K2,MAPK1,MAPK12,MAPK3,MAPK8,NFKB1,NFKB2,NOTCH1,PA2G4,PDGFC,PIK3C2A,PIK3C2G,PIK3C3,PIK3CA,PIK3CB,PIK3R1,PLD2,PLD6,PTGS2,RAC1,RAF1,RALA,RALBP1,RB1,SIN3A,SMAD2,SMAD3,STAT1,STAT3,TFDP1,TGFA,TGFB1,TGFB2,TGFBR2,TP53,VEGFA,VEGFB,VEGFC
IL-6 Signaling	7.55	0.56	-4.454	ABCB1,AKT1,AKT2,AKT3,CD14,CEBPB,COL1A1,CSNK2A1,CSNK2A2,CXCL8,GRB2,HSPB1,IKBKB,IKBKE,IKBKG,IL18,IL1A,IL1B,IL1R1,IL1RAP,IL1RL1,IL1RL2,IL36G,IL36RN,IL6,IL6ST,JAK2,JUN,KRAS,MAP2K1,MAP2K2,MAP3K14,MAP3K7,MAP4K4,MAPK1,MAPK12,MAPK13,MAPK14,MAPK3,MAPK8,MAPKAPK2,MCL1,MRAS,NFKB1,NFKB2,NFKBIA,NFKBID,NFKBIE,NGFR,PIK3C2A,PIK3C2G,PIK3C3,PIK3CA,PIK3CB,PIK3R1,PTPN11,RAF1,RALA,RALB,RAP1B,RAP2B,RRAS,RRAS2,SHC1,SOCS…
Basal Cell Carcinoma Signaling	7.53	0.639	1.768	APC2,AXIN1,BMP1,BMP2,BMP3,BMP4,BMP6,BMP7,BMP8B,CTNNB1,DVL2,DVL3,FZD10,FZD2,FZD3,FZD4,FZD5,FZD6,FZD7,FZD8,FZD9,GLI1,GLI2,GLIS1,GSK3B,HHIP,KIF7,LEF1,PTCH1,PTCH2,SMO,STK36,SUFU,TCF4,TCF7,TCF7L1,TP53,WNT10B,WNT11,WNT3,WNT3A,WNT4,WNT5A,WNT7B,WNT9A,ZNF875
Ovarian Cancer Signaling	7.52	0.547	-1.808	AKT1,AKT2,AKT3,ARRB1,AXIN1,BRCA2,CCND1,CTNNB1,E2F1,EDN1,EGFR,FGF9,FZD10,FZD2,FZD3,FZD4,FZD5,FZD6,FZD7,FZD8,FZD9,GSK3B,KRAS,LEF1,MAP2K1,MAP2K2,MAPK1,MAPK3,MLH1,MMP2,MRAS,MSH2,MSH6,PA2G4,PDGFC,PIK3C2A,PIK3C2G,PIK3C3,PIK3CA,PIK3CB,PIK3R1,PRKAG2,PRKAR1A,PRKAR2A,PRKAR2B,PTEN,PTGS1,PTGS2,RAF1,RALA,RALB,RAP1B,RAP2B,RB1,RPS6KB1,RRAS,RRAS2,SIN3A,SMO,SRC,TCF4,TCF7,TCF7L1,TFDP1,TP53,VEGFA,VEGFB,VEGFC,WNT10B…
Gαq Signaling	7.49	0.532	0.239	AGTR1,AKT1,AKT2,AKT3,ARHGEF25,CALM1 (includes others),CAMK4,CHP1,CHRM3,GNA11,GNA15,GNB1,GNB1L,GNB2,GNB3,GNB4,GNB5,GNG12,GNG2,GNG4,GNG5,GNG7,GPLD1,GRK2,GSK3B,HMOX1,HRH1,HTR2C,IKBKB,IKBKE,IKBKG,ITPR1,ITPR3,MAP2K1,MAP2K2,MAPK1,MAPK3,MRAS,NFATC1,NFATC3,NFATC4,NFKB1,NFKB2,NFKBIA,NFKBID,NFKBIE,PIK3C2A,PIK3C2G,PIK3C3,PIK3CA,PIK3CB,PIK3R1,PLCB1,PLCB3,PLCG2,PLD2,PLD6,PPP3CA,PPP3R1,PRKCA,PRKCD,PRKCH,PRKCI,…
Regulation of the Epithelial-Mesenchymal Transition Pathway	7.43	0.51	#NUM!	ADAM17,AKT1,AKT2,AKT3,AXIN1,BCL9,CDH1,CDH12,CDH2,CTNNB1,DVL2,DVL3,EGFR,EGR1,ESRP2,ETS1,FGF13,FGF2,FGF5,FGF9,FGFR1,FGFR3,FGFR4,FOXC2,FRS2,FZD10,FZD2,FZD3,FZD4,FZD5,FZD6,FZD7,FZD8,FZD9,GRB2,GSC,GSK3B,HIF1A,JAG1,JAG2,JAK2,KRAS,LEF1,LOX,MAP2K1,MAP2K2,MAPK1,MAPK3,MET,MMP2,MRAS,NFKB1,NFKB2,NOTCH1,NOTCH2,PARD6G,PDGFD,PIK3C2A,PIK3C2G,PIK3C3,PIK3CA,PIK3CB,PIK3R1,PSEN1,PSEN2,PTPN11,RAF1,RALA,RALB,RAP1B,RAP…
STAT3 Pathway	7.41	0.548	-1.549	BMP6,BMPR2,CDC25A,EGFR,FGF2,FGFR1,FGFR3,FGFR4,FLT1,FLT4,GHR,IFNLR1,IGF1R,IL12RB2,IL13RA1,IL15RA,IL17RC,IL17RD,IL17RE,IL1A,IL1B,IL1R1,IL1RL1,IL1RL2,IL20RA,IL20RB,IL22RA1,IL31RA,IL4R,IL6ST,IL7R,INSR,JAK2,KRAS,MAP2K1,MAP2K2,MAP3K11,MAP3K20,MAP3K21,MAP3K9,MAPK1,MAPK12,MAPK13,MAPK14,MAPK3,MAPK8,MRAS,NGFR,NTRK2,PDGFB,PIAS3,PIM1,PTPN2,PTPN6,RAC1,RAF1,RALA,RALB,RAP1B,RAP2B,RRAS,RRAS2,SOCS2,SOCS3,SOCS6,SR…
Cyclins and Cell Cycle Regulation	7.4	0.617	0	ATR,CCNA1,CCNB1,CCNB2,CCND1,CCND3,CCNE2,CDC25A,CDK1,CDK2,CDK6,CDK7,CDKN1B,CDKN2B,CDKN2D,CUL1,E2F1,E2F2,E2F3,E2F5,E2F7,FBXL5,GSK3B,HDAC1,HDAC5,HDAC7,HDAC8,HDAC9,MYT1,PA2G4,PPM1L,PPP2CA,PPP2CB,PPP2R1B,PPP2R2A,PPP2R2B,PPP2R2C,PPP2R3A,PPP2R5D,PPP2R5E,PTPA,RAF1,RB1,SIN3A,SKP1,TFDP1,TGFB1,TGFB2,TP53,WEE1
Semaphorin Signaling in Neurons	7.39	0.667	#NUM!	ARHGAP1,ARHGEF12,CDK5,CFL1,CRMP1,DPYSL3,DPYSL4,DPYSL5,FYN,ITGB1,LIMK1,LIMK2,MAPK1,MAPK3,MET,NRP1,PAK1,PAK2,PAK3,PAK4,PAK6,PLXNA1,PLXNB1,RAC1,RAC2,RAC3,RHOA,RHOB,RHOBTB1,RHOBTB2,RHOC,RHOF,RHOQ,RHOT1,RHOT2,RHOU,RND2,RND3,SEMA3A,SEMA7A
Apelin Cardiomyocyte Signaling Pathway	7.3	0.586	-0.405	AKT1,AKT2,AKT3,APLN,ARNT,ATP2A1,ATP2A2,ATP2A3,CAT,GNA11,GNAI1,GNAI2,GNAI3,HIF1A,ITPR1,MAPK1,MAPK12,MAPK13,MAPK14,MAPK15,MAPK3,MAPK4,MAPK6,MAPK8,MYL12A,MYL12B,MYL6,MYL6B,MYL9,PDIA3,PIK3C2A,PIK3C2G,PIK3C3,PIK3CA,PIK3CB,PIK3R1,PLCB1,PLCB3,PLCD3,PLCE1,PLCG2,PLCH1,PLCH2,PLCL1,PLCL2,PRKCA,PRKCD,PRKCH,PRKCI,PRKD1,PRKD3,SLC8A1,SLC9A1,SLC9A3,SLC9A5,SLC9A6,SLC9A8,TGFB1
CDK5 Signaling	7.3	0.574	-1.192	ADCY1,ADCY3,ADCY6,ADCY7,ADCY9,BDNF,CABLES1,CAPN1,CDK5,EGR1,ITGA2,ITGA3,ITGA6,ITGB1,KRAS,LAMA1,LAMA5,LAMB1,LAMC1,MAP2K1,MAP2K2,MAPK1,MAPK12,MAPK13,MAPK14,MAPK15,MAPK3,MAPK4,MAPK6,MAPK8,MAPT,MRAS,NGFR,NTRK2,PPM1L,PPP1CA,PPP1CB,PPP1CC,PPP1R12A,PPP1R14A,PPP1R3D,PPP2CA,PPP2CB,PPP2R1B,PPP2R2A,PPP2R2B,PPP2R2C,PPP2R3A,PPP2R5D,PPP2R5E,PRKAG2,PRKAR1A,PRKAR2A,PRKAR2B,PTPA,RAF1,RALA,RALB,RAP1B,RAP2B,RRAS,RRA…
PI3K Signaling in B Lymphocytes	7.29	0.543	-1.912	AKT1,AKT2,AKT3,ATF4,ATF5,BCL10,C3,CALM1 (includes others),CAMK2B,CAMK2G,CAMK4,CARD10,CBL,CD19,CD81,CHP1,CREB1,DAPP1,FYN,IKBKB,IKBKE,IKBKG,IL4R,INPP5D,IRS1,IRS2,ITPR1,ITPR3,JUN,KRAS,LYN,MALT1,MAP2K1,MAP2K2,MAPK1,MAPK3,MRAS,NFATC1,NFATC3,NFATC4,NFKB1,NFKB2,NFKBIA,NFKBID,NFKBIE,PDIA3,PIK3AP1,PIK3CA,PIK3CB,PIK3R1,PLCB1,PLCB3,PLCD3,PLCE1,PLCG2,PLCH1,PLCH2,PLCL1,PLCL2,PLEKHA1,PLEKHA2,PPP3CA,PPP3R1,PRKC…
G Beta Gamma Signaling	7.24	0.557	-0.75	ADCY1,AKT1,AKT2,AKT3,ARHGEF6,CACNA1B,CACNA1C,CACNA1G,CACNA1H,CACNA2D1,CACNA2D2,CACNA2D3,CACNB2,CACNB3,CACNB4,CACNG4,CACNG8,CAV1,CAV2,EGFR,GNA11,GNA12,GNA13,GNA15,GNAI1,GNAI2,GNAI3,GNAO1,GNAZ,GNB1,GNB1L,GNB2,GNB3,GNB4,GNB5,GNG12,GNG2,GNG4,GNG5,GNG7,GRB2,HBEGF,KRAS,MAPK1,MAPK3,MRAS,PAK1,PLCG2,PRKAG2,PRKAR1A,PRKAR2A,PRKAR2B,PRKCA,PRKCD,PRKCH,PRKCI,PRKD1,PRKD3,RAF1,RALA,RALB,RAP1B,RAP2B,RRAS,RRAS2,SH…
Osteoarthritis Pathway	7.18	0.498	-2.888	ALPL,ALPP,ANXA2,ATF4,BMP2,BMPR2,CASP1,CASP10,CASP3,CASP4,CASP6,CASP7,CASP8,CEBPB,COL2A1,CREB1,CREB3,CREB5,CREBBP,CTNNA1,CTNNB1,CXCL8,DDR2,DKK1,DLX5,ELF3,EPAS1,FGF2,FGFR1,FGFR3,FN1,FZD10,FZD2,FZD3,FZD4,FZD5,FZD6,FZD7,FZD8,FZD9,GLI1,GLI2,GLIS1,HIF1A,HMGB1,HTRA1,IL1B,IL1R1,IL1RAP,IL1RL1,IL1RL2,ITGA2,ITGA3,ITGA4,ITGA5,ITGB1,JAG1,LEF1,LRP1,MATN3,MEF2C,MTF1,MYBBP1A,NFKB1,NFKB2,NKX3-2,NOS2,NOTCH1,PDGFC,…
NRF2-mediated Oxidative Stress Response	7.16	0.508	-0.674	ABCC1,ABCC4,ACTB,ACTG1,AKT1,AOX1,ATF4,CAT,CCT7,CDC34,CREBBP,DNAJA3,DNAJA4,DNAJB11,DNAJB12,DNAJB14,DNAJB2,DNAJB9,DNAJC13,DNAJC15,DNAJC3,DNAJC5,DNAJC6,DNAJC7,DNAJC8,DNAJC9,ENC1,EP300,FKBP5,FOSL1,FTH1,FTL,GCLM,GSK3B,GSR,GSTA4,GSTM2,GSTO1,GSTO2,GSTP1,GSTT2/GSTT2B,GSTZ1,HACD3,HMOX1,HSPB8,JUN,JUNB,KEAP1,KRAS,MAF,MAFF,MAFK,MAP2K1,MAP2K2,MAP3K7,MAPK1,MAPK14,MAPK3,MAPK8,MGST1,MRAS,NFE2L2,NQO1,PIK3C2A,PIK3…
HGF Signaling	7.15	0.568	-2.94	AKT1,AKT2,AKT3,CCND1,CDK2,ELF1,ELF3,ELF4,ELK3,ETS1,ETS2,GRB2,IL6,ITGA2,ITGA3,ITGA4,ITGA5,ITGB1,JUN,KRAS,MAP2K1,MAP2K2,MAP3K11,MAP3K14,MAP3K15,MAP3K2,MAP3K6,MAP3K7,MAP3K8,MAP3K9,MAPK1,MAPK12,MAPK3,MAPK8,MET,MRAS,PAK1,PIK3C2A,PIK3C2G,PIK3C3,PIK3CA,PIK3CB,PIK3R1,PLCG2,PRKCA,PRKCD,PRKCH,PRKCI,PRKD1,PRKD3,PTGS2,PTPN11,PXN,RAC1,RAF1,RALA,RALB,RAP1B,RAP2B,RRAS,RRAS2,SOS2,STAT3
RAR Activation	7.15	0.505	#NUM!	ACTB,ADCY1,ADCY3,ADCY6,ADCY7,ADCY9,AKR1B1,AKR1C3,AKT1,AKT2,AKT3,ALDH1A2,ALDH1A3,BMP2,CARM1,CDK7,CRABP2,CREBBP,CSNK2A1,CSNK2A2,CYP26A1,DHRS3,DPF1,DUSP1,EP300,GTF2H2,GTF2H5,IGFBP3,JAK2,JUN,LRAT,MAP2K1,MAPK1,MAPK12,MAPK13,MAPK14,MAPK8,MAPKAPK2,NCOR2,NFKB1,NFKB2,NR2F1,NR2F2,NRIP1,NSD1,PARP1,PBRM1,PHF10,PIK3CA,PIK3CB,PIK3R1,PML,PNRC1,PPARGC1A,PRKAG2,PRKAR1A,PRKAR2A,PRKAR2B,PRKCA,PRKCD,PRKCH,PRKCI,PRKD…
Adrenomedullin signaling pathway	7.07	0.503	-1.539	ADCY1,ADCY3,ADCY6,ADCY7,ADCY9,ADM,AKT1,AKT2,AKT3,ARNT,BAD,C3,CALM1 (includes others),CAMK4,CASP3,CEBPB,CFH,CRCP,CTH,GAD1,GNA11,GNA15,GRB2,GSK3B,GUCY1A1,GUCY1A2,GUCY1B1,HIF1A,IL18,IL1A,IL1B,IL36G,IL36RN,ITPR1,ITPR3,KCNH2,KCNN1,KCNN2,KCNN4,KCNQ2,KRAS,MAP2K1,MAP2K2,MAPK1,MAPK12,MAPK13,MAPK14,MAPK15,MAPK3,MAPK4,MAPK6,MAPK8,MATK,MAX,MMP2,MRAS,NFKB1,NFKB2,NPR2,PDIA3,PIK3C2A,PIK3C2G,PIK3C3,PIK3CA,PIK3CB…
CREB Signaling in Neurons	7.05	0.498	-0.728	ADCY1,ADCY3,ADCY6,ADCY7,ADCY9,AKT1,AKT2,AKT3,ATF4,CACNA1B,CACNA1C,CACNA1G,CACNA1H,CACNA2D1,CACNA2D2,CACNA2D3,CACNB2,CACNB3,CACNB4,CACNG4,CACNG8,CALM1 (includes others),CAMK2B,CAMK2G,CAMK4,CREB1,CREB3,CREB5,CREBBP,EP300,GNA11,GNA12,GNA13,GNA15,GNAI1,GNAI2,GNAI3,GNAO1,GNAZ,GNB1,GNB1L,GNB2,GNB3,GNB4,GNB5,GNG12,GNG2,GNG4,GNG5,GNG7,GRB2,GRID1,GRIN2C,GRIN2D,ITPR1,ITPR3,KRAS,MAP2K1,MAP2K2,MAPK1,MAPK3,MR…
Actin Nucleation by ARP-WASP Complex	6.96	0.625	-2.271	ACTR3,ARPC1A,ARPC2,ARPC3,ARPC5,ARPC5L,BAIAP2,GNA12,GRB2,ITGA2,ITGA3,ITGA4,ITGA5,ITGB1,KRAS,MRAS,NCK1,PPP1R12A,PPP1R12C,RAC1,RAC2,RAC3,RALA,RALB,RAP1B,RAP2B,RHOA,RHOB,RHOBTB1,RHOBTB2,RHOC,RHOF,RHOQ,RHOT1,RHOT2,RHOU,RND2,RND3,RRAS,RRAS2,SOS2,VASP,WASF1,WASL,WIPF1
Chronic Myeloid Leukemia Signaling	6.94	0.573	#NUM!	AKT1,AKT2,AKT3,BAD,BCL2L1,CBLC,CCND1,CDK6,CDKN1B,CTBP2,E2F1,E2F2,E2F3,E2F5,E2F7,GRB2,HDAC1,HDAC5,HDAC7,HDAC8,HDAC9,IKBKB,IKBKE,IKBKG,KRAS,MAP2K1,MAP2K2,MAPK1,MAPK3,MECOM,MRAS,NFKB1,NFKB2,PA2G4,PIK3C2A,PIK3C2G,PIK3C3,PIK3CA,PIK3CB,PIK3R1,PTPN11,RAF1,RALA,RALB,RAP1B,RAP2B,RB1,RBL1,RRAS,RRAS2,SIN3A,SMAD3,SOS2,STAT5A,TFDP1,TGFB1,TGFB2,TGFBR2,TP53
Glioma Signaling	6.9	0.564	-1.938	AKT1,AKT2,AKT3,CALM1 (includes others),CAMK1,CAMK2B,CAMK2G,CAMK4,CCND1,CDK6,CDKN2B,CDKN2D,E2F1,E2F2,E2F3,E2F5,E2F7,EGFR,GRB2,IDH2,IDH3G,IGF1R,KRAS,MAP2K1,MAP2K2,MAPK1,MAPK3,MRAS,PA2G4,PDGFA,PDGFB,PDGFC,PDGFD,PIK3C2A,PIK3C2G,PIK3C3,PIK3CA,PIK3CB,PIK3R1,PLCG2,PRKCA,PRKCD,PRKCH,PRKCI,PRKD1,PRKD3,PTEN,RAF1,RALA,RALB,RAP1B,RAP2B,RB1,RBL1,RRAS,RRAS2,SHC1,SIN3A,SOS2,TFDP1,TGFA,TP53
Sphingosine-1-phosphate Signaling	6.88	0.556	-0.788	ACER2,ACER3,ADCY1,ADCY3,ADCY6,ADCY7,ADCY9,AKT1,AKT2,AKT3,ASAH1,CASP1,CASP10,CASP3,CASP4,CASP6,CASP7,CASP8,GNA12,GNA13,GNAI1,GNAI2,GNAI3,MAPK1,MAPK3,PDGFA,PDGFB,PDGFC,PDGFD,PDIA3,PIK3C2A,PIK3C2G,PIK3C3,PIK3CA,PIK3CB,PIK3R1,PLCB1,PLCB3,PLCD3,PLCE1,PLCG2,PLCH1,PLCH2,PLCL1,PLCL2,PTK2B,RAC1,RAC2,RAC3,RHOA,RHOB,RHOBTB1,RHOBTB2,RHOC,RHOF,RHOQ,RHOT1,RHOT2,RHOU,RND2,RND3,S1PR5,SMPD1,SMPD2,SPHK1
Aryl Hydrocarbon Receptor Signaling	6.84	0.531	-2.177	AHR,AIP,ALDH16A1,ALDH18A1,ALDH1A2,ALDH1A3,ALDH1L2,ALDH3B1,ALDH4A1,ALDH5A1,ALDH6A1,ALDH7A1,ALDH9A1,ARNT,ATR,CCNA1,CCND1,CCND3,CCNE2,CDK2,CDK6,CDKN1B,CHEK1,CHEK2,CTSD,CYP1B1,DHFR,E2F1,EP300,FAS,GSTA4,GSTM2,GSTO1,GSTO2,GSTP1,GSTT2/GSTT2B,GSTZ1,HSP90B1,HSPB1,IL1A,IL1B,IL6,JUN,MAPK1,MAPK3,MAPK8,MCM7,MGST1,NCOA2,NCOA3,NCOA7,NCOR2,NFE2L2,NFIB,NFIC,NFKB1,NFKB2,NQO1,NR2F1,NRIP1,POLA1,RARB,RARG,RB1,RBL1,RX…
Endocannabinoid Cancer Inhibition Pathway	6.84	0.531	-1.27	ADCY1,ADCY3,ADCY6,ADCY7,ADCY9,AKT1,AKT2,AKT3,ATF4,BAD,CAMKK2,CASP1,CASP10,CASP3,CASP4,CASP6,CASP7,CASP8,CCND1,CCND3,CCNE2,CDH1,CDKN1B,CREB1,CREB3,CREB5,CREBBP,CTNNB1,GNA13,GNAI1,GNAI2,GNAI3,GNAO1,GNB1L,GSK3B,HIF1A,LEF1,MAP2K1,MAP2K2,MAPK1,MAPK14,MAPK3,MLST8,MMP2,NOS2,PDGFC,PIK3C2A,PIK3C2G,PIK3C3,PIK3CA,PIK3CB,PIK3R1,PRKAA1,PRKAA2,PRKAG2,PRKAR1A,PRKAR2A,PRKAR2B,RAF1,RHOA,SMPD1,SMPD2,SNAI2,SPTLC1,S…
BEX2 Signaling Pathway	6.83	0.608	-0.146	AKT1,AKT2,AKT3,BAD,BAK1,BBC3,BEX1,BEX2,CCND1,CDH2,CTNNB1,ERBB2,GSK3B,HIF1A,JUN,LEF1,LGALS1,LMO2,MAPK12,MAPK8,MMP2,NFKB1,NFKB2,NFKBIA,NGFR,PDGFC,PPM1L,PPP2CA,PPP2CB,PPP2R1B,PPP2R2A,PPP2R2B,PPP2R2C,PPP2R3A,PPP2R5D,PPP2R5E,PTEN,PTPA,SMARCB1,SPP1,STAT3,TCF4,TCF7,TCF7L1,TSC2,VEGFA,VEGFB,VEGFC
Apoptosis Signaling	6.83	0.576	-0.944	AIFM1,BAD,BAK1,BCL2A1,BCL2L1,BCL2L10,BID,BIRC2,BIRC3,CAPN1,CAPN10,CAPN2,CAPN5,CAPNS1,CASP10,CASP3,CASP6,CASP7,CASP8,CDK1,CYCS,DFFA,DFFB,FAS,IKBKB,IKBKE,IKBKG,KRAS,LMNA,MAP2K1,MAP2K2,MAP3K14,MAP4K4,MAPK1,MAPK3,MAPK8,MCL1,MRAS,NFKB1,NFKB2,NFKBIA,NFKBID,NFKBIE,PARP1,PLCG2,PRKCA,RAF1,RALA,RALB,RAP1B,RAP2B,RPS6KA1,RRAS,RRAS2,TNFRSF1A,TP53,XIAP
EIF2 Signaling	6.78	0.487	2.018	ACTB,AKT1,AKT2,AKT3,ATF4,ATF5,CCND1,EIF1,EIF2AK2,EIF2AK4,EIF2B1,EIF2B4,EIF2S1,EIF2S2,EIF3C,EIF3D,EIF3F,EIF3G,EIF3H,EIF3I,EIF3L,EIF3M,EIF4A2,EIF4G3,FAU,GRB2,GSK3B,HNRNPA1,HSPA5,IGF1R,INSR,KRAS,MAP2K1,MAP2K2,MAPK1,MAPK3,MRAS,PABPC1,PAIP1,PIK3C2A,PIK3C2G,PIK3C3,PIK3CA,PIK3CB,PIK3R1,PPP1CA,PPP1CB,PPP1CC,RAF1,RALA,RALB,RAP1B,RAP2B,RPL10A,RPL11,RPL12,RPL13,RPL14,RPL15,RPL18,RPL18A,RPL21,RPL24,RPL26L1,R…
3-phosphoinositide Biosynthesis	6.77	0.515	-0.329	ACP5,ALPL,CDC25A,CDC25B,CDIPT,DOT1L,DUSP1,DUSP10,DUSP11,DUSP14,DUSP15,DUSP16,DUSP23,DUSP5,DUSP8,FIG4,HACD2,INPP5B,INPP5F,MTMR2,MTMR4,MTMR7,NOCT,NUDT11,NUDT16,NUDT3,NUDT5,PALD1,PAWR,PDXP,PGAM5,PI4K2A,PI4K2B,PI4KA,PI4KB,PIK3C2A,PIK3C2G,PIK3C3,PIK3CA,PIK3CB,PIK3R1,PIP4K2B,PIP4K2C,PIP5K1B,PLPP7,PPFIA2,PPFIA3,PPFIA4,PPIP5K1,PPM1H,PPM1K,PPP1CA,PPP1CC,PPP1R12A,PPP1R12C,PPP1R13B,PPP1R14A,PPP1R16B,PPP1R1A…
14-3-3-mediated Signaling	6.75	0.543	-0.927	AKT1,AKT2,AKT3,BAD,CBL,CDKN1B,EDC3,FOXO1,GRB2,GSK3B,JUN,KRAS,MAP2K1,MAP2K2,MAPK1,MAPK12,MAPK3,MAPK8,MAPT,MRAS,PDCD6IP,PDIA3,PIK3C2A,PIK3C2G,PIK3C3,PIK3CA,PIK3CB,PIK3R1,PLCB1,PLCB3,PLCD3,PLCE1,PLCG2,PLCH1,PLCH2,PLCL1,PLCL2,PRKCA,PRKCD,PRKCH,PRKCI,PRKD1,PRKD3,RAF1,RALA,RALB,RAP1B,RAP2B,RPS6KA1,RRAS,RRAS2,SRC,TNFRSF1A,TP73,TSC2,TUBA1A,TUBA1C,TUBA4A,TUBB2B,TUBB4A,TUBB4B,TUBB6,VIM,YAP1,YWHAB,YWHAE,YWH…
Phospholipase C Signaling	6.75	0.475	-1.2	ADCY1,ADCY3,ADCY6,ADCY7,ADCY9,AHNAK,ARHGEF1,ARHGEF12,ARHGEF16,ARHGEF17,ARHGEF19,ARHGEF4,ARHGEF6,ARHGEF7,ATF4,CALM1 (includes others),CAMK4,CHP1,CREB1,CREB3,CREB5,CREBBP,EP300,FYN,GNA13,GNB1,GNB1L,GNB2,GNB3,GNB4,GNB5,GNG12,GNG2,GNG4,GNG5,GNG7,GPLD1,GRB2,HDAC1,HDAC5,HDAC7,HDAC8,HDAC9,HMOX1,ITGA2,ITGA3,ITGA4,ITGA5,ITGB1,ITPR1,ITPR3,KRAS,LCK,LYN,MAP2K1,MAP2K2,MAPK1,MAPK3,MARCKS,MEF2C,MEF2D,MPRIP,MRAS…
Non-Small Cell Lung Cancer Signaling	6.7	0.616	-2.333	AKT1,AKT2,AKT3,BAD,CCND1,CDK6,E2F1,EGFR,ERBB2,FHIT,GRB2,ITPR1,ITPR3,KRAS,MAP2K1,MAP2K2,MAPK1,MAPK3,MRAS,PA2G4,PIK3C2A,PIK3C2G,PIK3C3,PIK3CA,PIK3CB,PIK3R1,PRKCA,RAF1,RALA,RALB,RAP1B,RAP2B,RARB,RASSF5,RB1,RRAS,RRAS2,RXRA,RXRG,SIN3A,SOS2,STK4,TFDP1,TGFA,TP53
B Cell Receptor Signaling	6.69	0.503	-2.711	AKT1,AKT2,AKT3,ATF4,BAD,BCL10,BCL2A1,BCL2L1,CALM1 (includes others),CAMK2B,CAMK2G,CAMK4,CARD10,CD19,CFL1,CREB1,CREB3,CREB5,CREBBP,DAPP1,EBF1,EGR1,ETS1,FOXO1,GRB2,GSK3B,IKBKB,IKBKE,IKBKG,INPP5B,INPP5D,INPP5F,INPP5J,JUN,KRAS,LYN,MALT1,MAP2K1,MAP2K2,MAP3K11,MAP3K14,MAP3K15,MAP3K2,MAP3K6,MAP3K7,MAP3K8,MAP3K9,MAPK1,MAPK12,MAPK13,MAPK14,MAPK3,MAPK8,MEF2C,MRAS,NFATC1,NFATC3,NFATC4,NFKB1,NFKB2,NFKBIA,NFK…
NF-κB Activation by Viruses	6.64	0.598	-3	AKT1,AKT2,AKT3,CXCR5,EIF2AK2,ELP1,IKBKB,IKBKE,IKBKG,ITGA1,ITGA2,ITGA3,ITGA4,ITGA5,ITGA6,ITGAV,ITGB1,ITGB5,KRAS,LCK,MAP3K14,MAPK1,MAPK3,MRAS,NFKB1,NFKB2,NFKBIA,NFKBID,NFKBIE,PIK3C2A,PIK3C2G,PIK3C3,PIK3CA,PIK3CB,PIK3R1,PRKCA,PRKCD,PRKCH,PRKCI,PRKD1,PRKD3,RAF1,RALA,RALB,RAP1B,RAP2B,RRAS,RRAS2,TNFRSF14
fMLP Signaling in Neutrophils	6.64	0.552	-1.838	ACTR3,ARPC1A,ARPC2,ARPC3,ARPC5,ARPC5L,CALM1 (includes others),CAMK4,CHP1,GNAI1,GNAI2,GNAI3,GNB1,GNB1L,GNB2,GNB3,GNB4,GNB5,GNG12,GNG2,GNG4,GNG5,GNG7,ITPR1,ITPR3,KRAS,MAP2K1,MAP2K2,MAPK1,MAPK3,MRAS,NCF2,NFATC1,NFATC3,NFATC4,NFKB1,NFKB2,NFKBIA,NFKBID,NFKBIE,PIK3C2A,PIK3C2G,PIK3C3,PIK3CA,PIK3CB,PIK3R1,PLCB1,PLCB3,PPP3CA,PPP3R1,PRKCA,PRKCD,PRKCH,PRKCI,PRKD1,PRKD3,RAC1,RAF1,RALA,RALB,RAP1B,RAP2B,RRAS,R…
Prostate Cancer Signaling	6.62	0.582	#NUM!	AKT1,AKT2,AKT3,ATF4,BAD,CCND1,CCNE2,CDK2,CDKN1B,CREB1,CREB3,CREB5,CREBBP,CTNNB1,E2F1,FOXO1,GRB2,GSK3B,GSTP1,HSP90B1,KRAS,LEF1,MAP2K1,MAP2K2,MAPK1,MAPK3,MRAS,NFKB1,NFKB2,NFKBIA,NFKBID,NFKBIE,PA2G4,PIK3C2A,PIK3C2G,PIK3C3,PIK3CA,PIK3CB,PIK3R1,PTEN,RAF1,RALA,RALB,RAP1B,RAP2B,RB1,RRAS,RRAS2,SIN3A,SOS2,SRD5A1,TFDP1,TP53
Virus Entry via Endocytic Pathways	6.6	0.561	#NUM!	ACTB,ACTG1,AP1G2,AP1S1,AP1S2,AP2A1,AP2A2,AP2B1,AP2M1,AP2S1,B2M,CAV1,CLTB,CLTC,CLTCL1,DNM1,FLNA,FLNB,FLNC,FYN,HLA-A,HLA-B,HLA-C,HLA-E,ITGA1,ITGA2,ITGA3,ITGA4,ITGA5,ITGA6,ITGB1,ITGB5,ITGB8,KRAS,MRAS,PIK3C2A,PIK3C2G,PIK3C3,PIK3CA,PIK3CB,PIK3R1,PLCG2,PRKCA,PRKCD,PRKCH,PRKCI,PRKD1,PRKD3,RAC1,RAC2,RAC3,RALA,RALB,RAP1B,RAP2B,RRAS,RRAS2,SRC,TFRC,ZBTB12
Tec Kinase Signaling	6.56	0.512	-3.255	ACTB,ACTG1,FAS,FRK,FYN,GNA11,GNA12,GNA13,GNA15,GNAI1,GNAI2,GNAI3,GNAO1,GNAZ,GNB1,GNB1L,GNB2,GNB3,GNB4,GNB5,GNG12,GNG2,GNG4,GNG5,GNG7,ITGA2,ITGA3,ITGA4,ITGA5,ITGB1,JAK2,LCK,LYN,MAPK12,MAPK8,MRAS,NFKB1,NFKB2,PAK1,PAK2,PAK3,PAK4,PAK6,PIK3C2A,PIK3C2G,PIK3C3,PIK3CA,PIK3CB,PIK3R1,PLCG2,PRKCA,PRKCD,PRKCH,PRKCI,PRKD1,PRKD3,PTK2B,RAC1,RAC2,RAC3,RHOA,RHOB,RHOBTB1,RHOBTB2,RHOC,RHOF,RHOQ,RHOT1,RHOT2,RHOU,RND…
Epithelial Adherens Junction Signaling	6.55	0.52	#NUM!	ACTB,ACTG1,ACTN1,ACTN2,ACTN4,ACTR3,ACVR1,ACVR2B,AKT1,AKT2,AKT3,ARPC1A,ARPC2,ARPC3,ARPC5,ARPC5L,BAIAP2,BMPR2,CDH1,CDH2,CLIP1,CTNNA1,CTNNB1,CTNND1,EGFR,EPN1,EPN3,FER,FGFR1,IQGAP1,JUP,KEAP1,KRAS,LEF1,LMO7,MAGI1,MET,MRAS,MYH10,MYH3,MYH9,MYL6,MYL6B,MYL9,NECTIN1,NECTIN3,NOTCH1,NOTCH2,PTEN,PTPRM,RAC1,RALA,RALB,RAP1B,RAP2B,RHOA,RRAS,RRAS2,SNAI2,SORBS1,SRC,TCF4,TCF7,TCF7L1,TGFB2,TGFBR2,TGFBR3,TUBA1A,TUBA1…
BMP signaling pathway	6.46	0.588	-0.59	BMP1,BMP2,BMP3,BMP4,BMP6,BMP7,BMP8B,BMPR2,CAMK4,CHRD,CREB1,CREBBP,FST,GRB2,HOXC9,JUN,KRAS,MAGED1,MAP2K1,MAP2K2,MAP3K7,MAPK1,MAPK12,MAPK13,MAPK14,MAPK3,MAPK8,MRAS,NFKB1,NFKB2,NKX2-5,PITX2,PRKAG2,PRKAR1A,PRKAR2A,PRKAR2B,RAF1,RALA,RALB,RAP1B,RAP2B,RRAS,RRAS2,RUNX2,SMAD7,SMAD9,SMURF1,TAB1,XIAP,ZNF423
Regulation of Actin-based Motility by Rho	6.46	0.574	-2.546	ACTB,ACTR3,ARHGDIA,ARPC1A,ARPC2,ARPC3,ARPC5,ARPC5L,BAIAP2,CFL1,GSN,ITGA2,ITGA3,ITGA4,ITGA5,ITGB1,LIMK1,MPRIP,MYL12A,MYL12B,MYL6,MYL6B,MYL9,PAK1,PAK2,PAK3,PAK4,PAK6,PFN1,PFN2,PI4KA,PIP4K2B,PIP4K2C,PIP5K1B,PPP1CB,PPP1R12A,RAC1,RAC2,RAC3,RHOA,RHOB,RHOBTB1,RHOBTB2,RHOC,RHOF,RHOQ,RHOT1,RHOT2,RHOU,RND2,RND3,WASF1,WASL,WIPF1
Sirtuin Signaling Pathway	6.39	0.46	-0.101	ABCA1,ACADL,ACLY,ADAM10,AKT1,APP,ARG2,ATG101,ATG13,ATG4C,ATG5,ATG9B,ATP5F1B,ATP5F1C,ATP5F1D,ATP5F1E,ATP5MC1,ATP5PB,ATP5PF,BPGM,CDH1,CLOCK,CPS1,CPT1A,CPT1C,CXCL8,CYC1,DOT1L,DUSP6,E2F1,EPAS1,ESRRA,FOXO1,FOXO4,G6PD,GABARAPL2,GABPA,GABPB1,GADD45A,GADD45B,GLUD1,GSK3B,GTF3C2,H1-10,H3-3A/H3-3B,HIF1A,IDH2,JUN,KAT2A,LDHC,MAP1LC3A,MAPK1,MAPK12,MAPK15,MAPK3,MAPK4,MAPK6,NBN,NDUFA1,NDUFA2,NDUFA3,NDUFA4,NDUFA5…
ATM Signaling	6.31	0.567	0.885	ATF4,ATR,BID,BLM,BRAT1,CBX5,CCNB1,CCNB2,CDC25A,CDK1,CDK2,CHEK1,CHEK2,CREB1,CREB3,CREB5,CREBBP,FANCD2,GADD45A,GADD45B,H2AX,HP1BP3,JUN,MAPK12,MAPK13,MAPK14,MAPK8,MDC1,MDM4,NBN,NFKBIA,PPM1D,PPM1L,PPP1CC,PPP2CA,PPP2CB,PPP2R1B,PPP2R2A,PPP2R2B,PPP2R2C,PPP2R3A,PPP2R5D,PPP2R5E,PTPA,RBBP8,RNF8,SMC1A,SMC3,TLK1,TP53,TP73,TRIM28,TRRAP,USP7,ZEB1
D-myo-inositol-5-phosphate Metabolism	6.31	0.513	0	ACP5,ALPL,CDC25A,CDC25B,DOT1L,DUSP1,DUSP10,DUSP11,DUSP14,DUSP15,DUSP16,DUSP23,DUSP5,DUSP8,FIG4,HACD2,INPP5B,INPP5F,MTMR2,MTMR4,MTMR7,NOCT,NUDT11,NUDT16,NUDT3,NUDT5,PALD1,PAWR,PDXP,PGAM5,PIP4K2A,PIP4K2C,PIP4P2,PLCB1,PLCB3,PLCD3,PLCE1,PLCG2,PLCH1,PLPP7,PPFIA2,PPFIA3,PPFIA4,PPIP5K1,PPM1H,PPM1K,PPP1CA,PPP1CC,PPP1R12A,PPP1R12C,PPP1R13B,PPP1R14A,PPP1R16B,PPP1R1A,PPP1R8,PPP2R3A,PPP2R5D,PPP2R5E,PPP3CA,PP…
FAK Signaling	6.26	0.568	#NUM!	ACTB,ACTG1,AKT1,AKT2,AKT3,ARHGEF6,ARHGEF7,ASAP1,BCAR1,CAPN1,CAPN10,CAPN2,CAPN5,CAPNS1,EGFR,FYN,GRB2,ITGA2,ITGA3,ITGA4,ITGA5,ITGB1,KRAS,MAP2K1,MAP2K2,MAPK1,MAPK3,MRAS,PAK1,PAK2,PAK3,PAK4,PAK6,PIK3C2A,PIK3C2G,PIK3C3,PIK3CA,PIK3CB,PIK3R1,PLCG2,PTEN,PXN,RAC1,RAF1,RALA,RALB,RAP1B,RAP2B,RRAS,RRAS2,SOS2,SRC,TLN1,TNS1
Systemic Lupus Erythematosus In B Cell Signaling Pathway	6.17	0.462	-4.703	AKT1,AKT2,AKT3,BAD,BCL10,BCL2L1,CALM1 (includes others),CAMK4,CARD11,CBL,CCND1,CCND3,CD19,CHP1,CLCF1,CSF2,CTNNB1,CXCL8,EDA,FOXG1,FOXO1,FOXO4,FOXO6,FYN,GRB2,GSK3B,IFIH1,IFIT2,IFIT3,IFNGR1,IL11,IL12A,IL15,IL18,IL1A,IL1B,IL36G,IL6,IL6ST,INPP5B,INPP5D,INPP5F,INPP5J,IRAK1,IRAK4,IRF3,IRF5,IRF7,IRF9,ISG15,ISG20,JAK2,JUN,KRAS,LCK,LIF,LYN,MALT1,MAP2K1,MAP2K2,MAP3K14,MAP3K7,MAP4K4,MAPK1,MAPK3,MAVS,MCL1,MRA…
IL-15 Production	6.17	0.537	-2.109	ABL2,AXL,CLK2,CSF1R,DDR1,DDR2,DYRK3,EGFR,EPHA1,EPHA2,EPHA3,EPHA4,EPHA5,EPHA6,EPHA8,EPHB1,EPHB2,EPHB3,EPHB4,ERBB2,ERBB3,ERBB4,FER,FGFR1,FGFR3,FGFR4,FLT1,FLT4,FRK,FYN,IGF1R,IL15,IL6,INSR,IRF1,IRF3,JAK2,KIT,LCK,LTK,LYN,MAP2K1,MAP3K11,MATK,MET,MST1R,NFKB1,NFKB2,NTRK2,PEAK1,PRKCI,PTK2B,PTK6,ROR1,ROR2,RYK,SRC,STAT1,STYK1,SYK,TNK1,TNK2,TWF1,TXK,YES1
Small Cell Lung Cancer Signaling	6.13	0.606	-1.961	AKT1,AKT2,AKT3,BCL2L1,BID,BIRC2,CCND1,CCNE2,CDK2,CDK6,CDKN1B,CDKN2B,CKS1B,CYCS,E2F1,FHIT,IKBKB,IKBKE,IKBKG,MAX,NFKB1,NFKB2,NFKBIA,NFKBID,NFKBIE,PA2G4,PIAS3,PIK3C2A,PIK3C2G,PIK3C3,PIK3CA,PIK3CB,PIK3R1,PTEN,PTGS2,RARB,RB1,RXRA,RXRG,SIN3A,TFDP1,TP53,TRAF4
FLT3 Signaling in Hematopoietic Progenitor Cells	6.09	0.588	-2.48	AKT1,AKT2,AKT3,ATF4,BAD,CBL,CREB1,CREB3,CREB5,CREBBP,EIF4EBP1,GRB2,INPP5D,KRAS,MAP2K1,MAP2K2,MAPK1,MAPK12,MAPK13,MAPK14,MAPK3,MRAS,PIK3C2A,PIK3C2G,PIK3C3,PIK3CA,PIK3CB,PIK3R1,PTPN11,RAF1,RALA,RALB,RAP1B,RAP2B,RPS6KA1,RPS6KA4,RPS6KA6,RPS6KB1,RRAS,RRAS2,SHC1,SOS2,STAT1,STAT2,STAT3,STAT5A,STAT6
TGF-β Signaling	6.06	0.562	-0.457	ACVR1,ACVR2B,AMH,BMP2,BMP4,BMP7,BMPR2,CREBBP,EP300,GRB2,GSC,HDAC1,HOXC9,IRF7,JUN,KRAS,MAP2K1,MAP2K2,MAP3K7,MAP4K1,MAPK1,MAPK12,MAPK13,MAPK14,MAPK3,MAPK8,MRAS,NKX2-5,PITX2,PMEPA1,RAF1,RALA,RALB,RAP1B,RAP2B,RNF111,RRAS,RRAS2,RUNX2,SMAD2,SMAD3,SMAD7,SMAD9,SMURF1,SMURF2,SOS2,TAB1,TFE3,TGFB1,TGFB2,TGFBR2,TGIF1,VDR,ZNF423
Androgen Signaling	6.05	0.522	1.761	CACNA1B,CACNA1C,CACNA1G,CACNA1H,CACNA2D1,CACNA2D2,CACNA2D3,CACNB2,CACNB3,CACNB4,CACNG4,CACNG8,CALM1 (includes others),CALR,CAMK4,CCND1,CDK7,CREBBP,EP300,GNA11,GNA12,GNA13,GNA15,GNAI1,GNAI2,GNAI3,GNAO1,GNAZ,GNB1,GNB1L,GNB2,GNB3,GNB4,GNB5,GNG12,GNG2,GNG4,GNG5,GNG7,GTF2A1,GTF2H2,GTF2H5,HSPA4,JUN,MAPK1,MAPK3,MRAS,NCOA2,NCOA4,NFKB1,NFKB2,POLR2B,POLR2D,POLR2F,POLR2J2/POLR2J3,POLR2K,PRKAG2,PRKAR1A,PRKAR…
ErbB Signaling	6	0.564	-2.774	AKT1,AREG,BTC,EGFR,ERBB2,ERBB3,ERBB4,FOXO1,GRB2,GSK3B,HBEGF,JUN,KRAS,MAP2K1,MAP2K2,MAPK1,MAPK12,MAPK13,MAPK14,MAPK3,MAPK8,MRAS,NCK1,NRG4,PAK1,PAK2,PAK3,PAK4,PAK6,PIK3C2A,PIK3C2G,PIK3C3,PIK3CA,PIK3CB,PIK3R1,PLCG2,PRKCA,PRKCD,PRKCH,PRKCI,PRKD1,PRKD3,RAF1,RALA,RALB,RAP1B,RAP2B,RPS6KB1,RRAS,RRAS2,SHC1,SOS2,TGFA
Erythropoietin Signaling	6	0.592	#NUM!	AKT1,AKT2,AKT3,CBL,GRB2,JAK2,JUN,KRAS,MAP2K1,MAP2K2,MAPK1,MAPK3,MRAS,NFKB1,NFKB2,NFKBIA,NFKBID,NFKBIE,PIK3C2A,PIK3C2G,PIK3C3,PIK3CA,PIK3CB,PIK3R1,PLCG2,PRKCA,PRKCD,PRKCH,PRKCI,PRKD1,PRKD3,PTPN6,RAF1,RALA,RALB,RAP1B,RAP2B,RPS6KB1,RRAS,RRAS2,SHC1,SOCS3,SOS2,SRC,STAT5A
Sperm Motility	5.99	0.475	0.14	ABL2,AXL,CACNA1G,CACNA1H,CALM1 (includes others),CAMK4,CATSPER1,CLK2,CNGA1,CSF1R,DDR1,DDR2,DYRK3,EGFR,EPHA1,EPHA2,EPHA3,EPHA4,EPHA5,EPHA6,EPHA8,EPHB1,EPHB2,EPHB3,EPHB4,ERBB2,ERBB3,ERBB4,FER,FGFR1,FGFR3,FGFR4,FLT1,FLT4,FRK,FYN,GUCY1A1,GUCY1A2,GUCY1B1,IGF1R,INSR,ITPR1,ITPR3,JAK2,KIT,LCAT,LCK,LTK,LYN,MAP2K1,MAP3K11,MATK,MET,MRAS,MST1R,NPPC,NTRK2,PDE1B,PDE2A,PDE4D,PDIA3,PEAK1,PLA2G4A,PLA2G6,PLA2G7,PL…
HIPPO signaling	5.98	0.576	2.058	AJUBA,AMOT,CSNK1E,CUL1,DLG1,DLG5,FRMD6,ITCH,LATS1,LATS2,MOB1A,NF2,PATJ,PPM1L,PPP1CA,PPP1CB,PPP1CC,PPP1R12A,PPP1R14A,PPP1R3D,PPP2CA,PPP2CB,PPP2R1B,PPP2R2A,PPP2R2B,PPP2R2C,PPP2R3A,PPP2R5D,PPP2R5E,PTPA,RASSF6,SCRIB,SKP1,SMAD2,SMAD3,STK3,STK4,TEAD1,TEAD2,TEAD3,TP53BP2,WWC1,WWTR1,YAP1,YWHAB,YWHAE,YWHAG,YWHAQ,YWHAZ
VEGF Signaling	5.93	0.556	-2.359	ACTB,ACTG1,ACTN1,ACTN2,ACTN4,AKT1,AKT2,AKT3,ARNT,BAD,BCL2L1,EIF1,EIF2B1,EIF2B4,EIF2S1,EIF2S2,ELAVL1,FLT1,FLT4,FOXO1,GRB2,HIF1A,KRAS,MAP2K1,MAP2K2,MAPK1,MAPK3,MRAS,PDGFC,PIK3C2A,PIK3C2G,PIK3C3,PIK3CA,PIK3CB,PIK3R1,PLCG2,PRKCA,PTK2B,PTPN11,PTPN6,PXN,RAF1,RALA,RALB,RAP1B,RAP2B,RRAS,RRAS2,SHC1,SOS2,SRC,VEGFA,VEGFB,VEGFC,YWHAE
Prolactin Signaling	5.88	0.58	-1.234	CEBPB,CREBBP,EP300,FYN,GRB2,IRF1,IRS1,JAK2,JUN,KRAS,MAP2K1,MAP2K2,MAPK1,MAPK3,MRAS,NMI,NR3C1,PIK3C2A,PIK3C2G,PIK3C3,PIK3CA,PIK3CB,PIK3R1,PLCG2,PRKCA,PRKCD,PRKCH,PRKCI,PRKD1,PRKD3,PTPN11,RAF1,RALA,RALB,RAP1B,RAP2B,RRAS,RRAS2,SHC1,SOCS2,SOCS3,SOCS6,SOS2,STAT1,STAT3,STAT5A,TCF7
GM-CSF Signaling	5.85	0.6	-3.042	AKT1,AKT2,AKT3,BCL2A1,BCL2L1,CAMK2B,CAMK2G,CCND1,CSF2,ETS1,GRB2,JAK2,KRAS,LYN,MAP2K1,MAP2K2,MAPK1,MAPK3,MRAS,PIK3C2A,PIK3C2G,PIK3C3,PIK3CA,PIK3CB,PIK3R1,PIM1,PPP3CA,PPP3R1,PTPN11,RACK1,RAF1,RALA,RALB,RAP1B,RAP2B,RRAS,RRAS2,RUNX1,SHC1,SOS2,STAT1,STAT3
RANK Signaling in Osteoclasts	5.84	0.568	-3.063	AKT1,AKT2,AKT3,BIRC2,BIRC3,CALM1 (includes others),CAMK4,CBL,CHP1,GSN,IKBKB,IKBKE,IKBKG,JUN,MAP2K1,MAP2K2,MAP3K11,MAP3K14,MAP3K15,MAP3K2,MAP3K6,MAP3K7,MAP3K8,MAP3K9,MAPK1,MAPK12,MAPK13,MAPK14,MAPK3,MAPK8,MITF,NFATC1,NFKB1,NFKB2,NFKBIA,NFKBID,NFKBIE,PIK3C2A,PIK3C2G,PIK3C3,PIK3CA,PIK3CB,PIK3R1,PPP3CA,PPP3R1,PTK2B,RAF1,SRC,TNFRSF11A,XIAP
Factors Promoting Cardiogenesis in Vertebrates	5.76	0.507	1.963	ACVR1,ACVR2B,ATF4,AXIN1,BMP1,BMP2,BMP3,BMP4,BMP6,BMP7,BMP8B,BMPR2,CAMK2B,CAMK2G,CCND1,CREB1,CREB3,CREB5,CREBBP,CTNNB1,DKK1,FZD10,FZD2,FZD3,FZD4,FZD5,FZD6,FZD7,FZD8,FZD9,GATA4,GSK3B,LEF1,LRP1,MAP3K7,MAPK12,MAPK14,MAPK8,MEF2C,NKX2-5,PDIA3,PLCB1,PLCB3,PLCD3,PLCE1,PLCG2,PLCH1,PLCH2,PLCL1,PLCL2,PRKCA,PRKCD,PRKCH,PRKCI,PRKD1,PRKD3,RHOA,SCN5A,SMAD2,SMAD9,SMO,TCF4,TCF7,TCF7L1,TGFB1,TGFB2,TGFBR2,TGFBR3,WN…
3-phosphoinositide Degradation	5.75	0.503	-0.459	ACP5,ALPL,CDC25A,CDC25B,DOT1L,DUSP1,DUSP10,DUSP11,DUSP14,DUSP15,DUSP16,DUSP23,DUSP5,DUSP8,FIG4,HACD2,INPP4B,INPP5B,INPP5D,INPP5E,INPP5F,INPP5J,MTM1,MTMR2,MTMR4,MTMR7,NOCT,NUDT11,NUDT16,NUDT3,NUDT5,PALD1,PAWR,PDXP,PGAM5,PIP4P2,PLPP7,PPFIA2,PPFIA3,PPFIA4,PPIP5K1,PPM1H,PPM1K,PPP1CA,PPP1CC,PPP1R12A,PPP1R12C,PPP1R13B,PPP1R14A,PPP1R16B,PPP1R1A,PPP1R8,PPP2R3A,PPP2R5D,PPP2R5E,PPP3CA,PPP4C,PPP4R1,PRUNE1,P…
Telomerase Signaling	5.74	0.542	-2.359	AKT1,AKT2,AKT3,E2F1,EGFR,ELF1,ELF3,ELF4,ELK3,ETS1,ETS2,GRB2,HDAC1,HDAC5,HDAC7,HDAC8,HDAC9,HSP90B1,KRAS,MAP2K1,MAP2K2,MAPK1,MAPK3,MRAS,PIK3C2A,PIK3C2G,PIK3C3,PIK3CA,PIK3CB,PIK3R1,POT1,PPM1L,PPP2CA,PPP2CB,PPP2R1B,PPP2R2A,PPP2R2B,PPP2R2C,PPP2R3A,PPP2R5D,PPP2R5E,PTPA,RAF1,RALA,RALB,RAP1B,RAP2B,RB1,RRAS,RRAS2,SHC1,SOS2,TEP1,TERF2,TERT,TINF2,TP53,TPP1
Wnt/Ca+ pathway	5.67	0.613	1.622	ATF4,AXIN1,CREB1,CREB3,CREB5,CREBBP,DVL2,DVL3,FZD10,FZD2,FZD3,FZD4,FZD5,FZD6,FZD7,FZD8,FZD9,GSK3B,NFATC1,NFATC3,NFATC4,NFKB1,NFKB2,PDIA3,PLCB1,PLCB3,PLCD3,PLCE1,PLCG2,PLCH1,PLCH2,PLCL1,PLCL2,PPP3CA,PRKCA,ROR1,SMO,WNT5A
Endothelin-1 Signaling	5.65	0.484	-1.897	ADCY1,ADCY3,ADCY6,ADCY7,ADCY9,CASP1,CASP10,CASP3,CASP4,CASP6,CASP7,CASP8,ECE1,EDN1,GNA11,GNA12,GNA13,GNA15,GNAI1,GNAI2,GNAI3,GNAO1,GNAZ,GPLD1,GRB2,GUCY1A1,GUCY1A2,GUCY1B1,HMOX1,ITPR1,ITPR3,JUN,KRAS,LCAT,MAPK1,MAPK12,MAPK13,MAPK14,MAPK15,MAPK3,MAPK4,MAPK6,MAPK8,MRAS,NOS2,PDIA3,PIK3C2A,PIK3C2G,PIK3C3,PIK3CA,PIK3CB,PIK3R1,PLA2G4A,PLA2G6,PLA2G7,PLA2R1,PLAAT3,PLAAT4,PLCB1,PLCB3,PLCD3,PLCE1,PLCG2,PLCH1…
Production of Nitric Oxide and Reactive Oxygen Species in Macrophages	5.65	0.484	-1.309	AKT1,AKT2,AKT3,ARG2,CAT,CREBBP,HOXA10,IFNGR1,IKBKB,IKBKE,IKBKG,IRF1,IRF8,JAK2,JUN,MAP2K1,MAP3K11,MAP3K14,MAP3K15,MAP3K2,MAP3K6,MAP3K7,MAP3K8,MAP3K9,MAPK1,MAPK12,MAPK13,MAPK14,MAPK3,MAPK8,NCF2,NFKB1,NFKB2,NFKBIA,NFKBID,NFKBIE,NGFR,NOS2,PIK3C2A,PIK3C2G,PIK3C3,PIK3CA,PIK3CB,PIK3R1,PLCG2,PPARA,PPM1L,PPP1CA,PPP1CB,PPP1CC,PPP1R12A,PPP1R14A,PPP1R3D,PPP2CA,PPP2CB,PPP2R1B,PPP2R2A,PPP2R2B,PPP2R2C,PPP2R3A,P…
Endometrial Cancer Signaling	5.63	0.617	-1.095	AKT1,AKT2,AKT3,APC2,AXIN1,BAD,CCND1,CDH1,CTNNA1,CTNNB1,ERBB2,GRB2,GSK3B,KRAS,LEF1,MAP2K1,MAP2K2,MAPK1,MAPK3,MLH1,MRAS,PIK3C2A,PIK3C2G,PIK3C3,PIK3CA,PIK3CB,PIK3R1,PTEN,RAF1,RALA,RALB,RAP1B,RAP2B,RRAS,RRAS2,SOS2,TP53
Paxillin Signaling	5.57	0.537	-3.96	ACTB,ACTG1,ACTN1,ACTN2,ACTN4,ARF1,ARF6,ARFIP2,ARHGEF6,ARHGEF7,BCAR1,GRB2,ITGA1,ITGA2,ITGA3,ITGA4,ITGA5,ITGA6,ITGA7,ITGA8,ITGA9,ITGAV,ITGB1,ITGB5,ITGB8,KRAS,MAPK1,MAPK12,MAPK13,MAPK14,MAPK8,MRAS,NCK1,PAK1,PAK2,PAK3,PAK4,PAK6,PARVA,PIK3C2A,PIK3C2G,PIK3C3,PIK3CA,PIK3CB,PIK3R1,PTK2B,PTPN12,PXN,RAC1,RALA,RALB,RAP1B,RAP2B,RRAS,RRAS2,SOS2,SRC,TLN1
Type II Diabetes Mellitus Signaling	5.51	0.507	-1.342	ABCC8,ACSL1,ACSL4,ACSL5,ADIPOR1,ADIPOR2,AKT1,AKT2,AKT3,CACNA1B,CACNA1C,CACNA1G,CACNA1H,CACNA2D1,CACNA2D2,CACNA2D3,CACNB2,CACNB3,CACNB4,CACNG4,CACNG8,CEBPB,GCK,IKBKB,IKBKE,IKBKG,INSR,IRS1,IRS2,KCNJ11,MAFA,MAP3K14,MAP3K7,MAPK1,MAPK12,MAPK3,MAPK8,NFKB1,NFKB2,NFKBIA,NFKBID,NFKBIE,NGFR,PDX1,PIK3C2A,PIK3C2G,PIK3C3,PIK3CA,PIK3CB,PIK3R1,PKM,PPARG,PRKAA1,PRKAA2,PRKAG2,PRKCA,PRKCD,PRKCH,PRKCI,PRKD1,PRKD3,S…
GDNF Family Ligand-Receptor Interactions	5.51	0.579	-1.441	ARTN,CREB1,DOK1,DOK3,DOK6,DOK7,FRS2,GDNF,GFRA1,GRB2,IRS1,IRS2,ITPR1,ITPR3,JUN,KRAS,MAP2K1,MAP2K2,MAPK1,MAPK12,MAPK3,MAPK8,MRAS,NCK1,NRTN,PDLIM7,PIK3C2A,PIK3C2G,PIK3C3,PIK3CA,PIK3CB,PIK3R1,PLCG2,RAC1,RAF1,RALA,RALB,RAP1B,RAP2B,RASA1,RRAS,RRAS2,SHC1,SOS2
Gα12/13 Signaling	5.49	0.515	-2.25	AKT1,AKT2,AKT3,ARHGEF1,CDH1,CDH10,CDH12,CDH13,CDH2,CDH23,CDH24,CDH3,CDH4,CDH5,CDH8,CTNNB1,F2RL1,GNA12,GNA13,IKBKB,IKBKE,IKBKG,JUN,KRAS,LPAR1,LPAR2,LPAR3,LPAR5,LPAR6,MAP2K1,MAP2K2,MAPK1,MAPK12,MAPK3,MAPK8,MEF2C,MEF2D,MRAS,MYL12A,MYL12B,MYL6,MYL6B,MYL9,NFKB1,NFKB2,NFKBIA,NFKBID,NFKBIE,PIK3C2A,PIK3C2G,PIK3C3,PIK3CA,PIK3CB,PIK3R1,PTK2B,PXN,RAF1,RALA,RALB,RAP1B,RAP2B,RASA1,RHOA,RRAS,RRAS2,SRC,VAV2
Renin-Angiotensin Signaling	5.49	0.525	-2.292	ADCY1,ADCY3,ADCY6,ADCY7,ADCY9,AGTR1,GRB2,ITPR1,ITPR3,JAK2,JUN,KRAS,MAP2K1,MAP2K2,MAPK1,MAPK12,MAPK13,MAPK14,MAPK3,MAPK8,MRAS,NFKB1,NFKB2,PAK1,PAK2,PAK3,PAK4,PAK6,PIK3C2A,PIK3C2G,PIK3C3,PIK3CA,PIK3CB,PIK3R1,PLCG2,PRKAG2,PRKAR1A,PRKAR2A,PRKAR2B,PRKCA,PRKCD,PRKCH,PRKCI,PRKD1,PRKD3,PTK2B,PTPN6,RAC1,RAF1,RALA,RALB,RAP1B,RAP2B,RRAS,RRAS2,SHC1,SHC2,SHC3,SHF,SOS2,STAT1,STAT3
Pyridoxal 5'-phosphate Salvage Pathway	5.48	0.6	-1.947	AKT2,CDK1,CDK18,CDK2,CDK5,CDK6,CDK7,CDK8,CSNK1A1,DAPK1,EIF2AK2,GRK4,GRK5,GRK6,IRAK1,LIMK1,LIMK2,MAK,MAP2K1,MAP2K2,MAP3K6,MAP3K8,MAP3K9,MAPK1,MAPK3,MAPK6,MAPK8,PAK1,PAK2,PAK3,PIM1,PKN1,PLK1,PRKAA1,PRKAA2,PRKCD,PRKCH,PRPF4B,SGK1
Human Embryonic Stem Cell Pluripotency	5.47	0.511	#NUM!	ACVR1,AKT1,AKT2,AKT3,AXIN1,BDNF,BMP1,BMP2,BMP3,BMP4,BMP6,BMP7,BMP8B,BMPR2,CTNNB1,FGF2,FGFR1,FGFR3,FGFR4,FOXD3,FOXO1,FZD10,FZD2,FZD3,FZD4,FZD5,FZD6,FZD7,FZD8,FZD9,GSK3B,LEF1,MRAS,NTF4,NTRK2,PDGFA,PDGFB,PDGFC,PDGFD,PIK3C2A,PIK3C2G,PIK3C3,PIK3CA,PIK3CB,PIK3R1,POU5F1,S1PR5,SMAD2,SMAD3,SMAD7,SMO,SOX2,SPHK1,TCF4,TCF7,TCF7L1,TGFB1,TGFB2,TGFBR2,UTF1,WNT10B,WNT11,WNT3,WNT3A,WNT4,WNT5A,WNT7B,WNT9A,ZIC3
Relaxin Signaling	5.42	0.5	-0.156	ADCY1,ADCY3,ADCY6,ADCY7,ADCY9,AKT1,AKT2,AKT3,CREB1,CTH,GAD1,GDE1,GDPD1,GNA11,GNA12,GNA13,GNA15,GNAI1,GNAI2,GNAI3,GNAO1,GNAZ,GNB1,GNB1L,GNB2,GNB3,GNB4,GNB5,GNG12,GNG2,GNG4,GNG5,GNG7,GUCY1A1,GUCY1A2,GUCY1B1,JUN,MAP2K1,MAPK1,MAPK3,MPPE1,MPPED2,MRAS,NFKB1,NFKB2,NFKBIA,NFKBID,NFKBIE,NOS2,NPR2,PDE10A,PDE11A,PDE12,PDE1B,PDE2A,PDE3A,PDE3B,PDE4D,PDE8A,PIK3C2A,PIK3C2G,PIK3C3,PIK3CA,PIK3CB,PIK3R1,PLD6,PRKAG…
SAPK/JNK Signaling	5.39	0.539	-2.335	DAXX,DUSP10,DUSP4,DUSP8,GADD45A,GNA12,GNA13,GNB1,GNB3,GNG2,GNG5,GNG7,GRB2,IRS1,JUN,KRAS,LCK,MAP3K11,MAP3K2,MAP3K20,MAP3K7,MAP3K9,MAP4K1,MAP4K2,MAP4K3,MAP4K4,MAP4K5,MAPK12,MAPK8,MAPK8IP2,MAPK8IP3,MINK1,MRAS,NFATC1,NFATC3,PIK3C2A,PIK3C2G,PIK3C3,PIK3CA,PIK3CB,PIK3R1,RAC1,RAC2,RAC3,RALA,RALB,RAP1B,RAP2B,RRAS,RRAS2,SHC1,SOS2,TAB1,TP53,TRADD
NGF Signaling	5.36	0.526	-2.474	AKT1,AKT2,AKT3,ATF4,CREB1,CREB3,CREB5,CREBBP,GRB2,IKBKB,IKBKE,IKBKG,KRAS,MAP2K1,MAP2K2,MAP3K11,MAP3K14,MAP3K15,MAP3K2,MAP3K6,MAP3K7,MAP3K8,MAP3K9,MAPK1,MAPK12,MAPK3,MAPK8,MRAS,NFKB1,NFKB2,NGFR,PIK3C2A,PIK3C2G,PIK3C3,PIK3CA,PIK3CB,PIK3R1,PLCG2,PRKCD,PTPN11,RAC1,RAF1,RALA,RALB,RAP1B,RAP2B,RHOA,RPS6KA1,RPS6KA4,RPS6KA6,RPS6KB1,RRAS,RRAS2,SHC1,SMPD1,SMPD2,SOS2,TP53,TRAF4,TRIO
IL-3 Signaling	5.36	0.57	-2.236	AKT1,AKT2,AKT3,BAD,CHP1,FOXO1,GRB2,INPP5D,JAK2,JUN,KRAS,MAP2K1,MAP2K2,MAPK1,MAPK3,MRAS,PAK1,PIK3C2A,PIK3C2G,PIK3C3,PIK3CA,PIK3CB,PIK3R1,PPP3CA,PPP3R1,PRKCA,PRKCD,PRKCH,PRKCI,PRKD1,PRKD3,PTPN6,RAC1,RAF1,RALA,RALB,RAP1B,RAP2B,RRAS,RRAS2,SHC1,STAT1,STAT3,STAT5A,STAT6
Agrin Interactions at Neuromuscular Junction	5.36	0.57	-3.507	ACTB,ACTG1,AGRN,ARHGEF6,ARHGEF7,CTTN,EGFR,ERBB2,ERBB3,ERBB4,GABPA,GABPB1,ITGA1,ITGA2,ITGA3,ITGA4,ITGA5,ITGA6,ITGB1,JUN,KRAS,LAMB1,LAMC1,MAPK1,MAPK12,MAPK3,MAPK8,MRAS,NRG4,PAK1,PAK2,PAK3,PAK4,PAK6,PXN,RAC1,RAC2,RAC3,RALA,RALB,RAP1B,RAP2B,RRAS,RRAS2,SRC
Aldosterone Signaling in Epithelial Cells	5.34	0.494	0.152	ASIC1,ASIC3,DNAJB11,DNAJB12,DNAJB14,DNAJB2,DNAJB9,DNAJC12,DNAJC13,DNAJC15,DNAJC2,DNAJC22,DNAJC24,DNAJC3,DNAJC5,DNAJC6,DNAJC7,DNAJC8,DNAJC9,DUSP1,HSCB,HSP90B1,HSPA12A,HSPA14,HSPA1A/HSPA1B,HSPA4,HSPA4L,HSPA5,HSPA8,HSPB1,HSPB8,HSPD1,HSPH1,ICMT,ITPR1,ITPR3,KRAS,MAP2K1,MAP2K2,MAPK1,MAPK3,NEDD4,NR3C2,PDIA3,PI4KA,PIK3C2A,PIK3C2G,PIK3C3,PIK3CA,PIK3CB,PIK3R1,PIP4K2B,PIP4K2C,PIP5K1B,PLCB1,PLCB3,PLCD3,PLCE1…
Cholecystokinin/Gastrin-mediated Signaling	5.33	0.521	-2.252	BCAR1,CCK,EGFR,EPHA4,GNA12,GNA13,GRB2,IL18,IL1A,IL1B,IL36G,IL36RN,ITPR1,ITPR3,JUN,KRAS,MAP2K1,MAP2K2,MAPK1,MAPK12,MAPK14,MAPK3,MAPK8,MEF2C,MEF2D,MRAS,PLCB1,PLCB3,PRKCA,PRKCD,PRKCH,PRKCI,PRKD1,PRKD3,PTGS2,PTK2B,PXN,RAC1,RAC2,RAC3,RAF1,RALA,RALB,RAP1B,RAP2B,RHOA,RHOB,RHOBTB1,RHOBTB2,RHOC,RHOF,RHOQ,RHOT1,RHOT2,RHOU,RND2,RND3,RRAS,RRAS2,SHC1,SOS2,SRC
D-myo-inositol (1,4,5,6)-Tetrakisphosphate Biosynthesis	5.31	0.504	-0.12	ACP5,ALPL,CDC25A,CDC25B,DOT1L,DUSP1,DUSP10,DUSP11,DUSP14,DUSP15,DUSP16,DUSP23,DUSP5,DUSP8,FIG4,HACD2,INPP5B,INPP5F,MTMR2,MTMR4,MTMR7,NOCT,NUDT11,NUDT16,NUDT3,NUDT5,PALD1,PAWR,PDXP,PGAM5,PLPP7,PPFIA2,PPFIA3,PPFIA4,PPIP5K1,PPM1H,PPM1K,PPP1CA,PPP1CC,PPP1R12A,PPP1R12C,PPP1R13B,PPP1R14A,PPP1R16B,PPP1R1A,PPP1R8,PPP2R3A,PPP2R5D,PPP2R5E,PPP3CA,PPP4C,PPP4R1,PRUNE1,PTEN,PTPA,PTPN1,PTPN11,PTPN12,PTPN2,PTPN6…
D-myo-inositol (3,4,5,6)-tetrakisphosphate Biosynthesis	5.31	0.504	-0.12	ACP5,ALPL,CDC25A,CDC25B,DOT1L,DUSP1,DUSP10,DUSP11,DUSP14,DUSP15,DUSP16,DUSP23,DUSP5,DUSP8,FIG4,HACD2,INPP5B,INPP5F,MTMR2,MTMR4,MTMR7,NOCT,NUDT11,NUDT16,NUDT3,NUDT5,PALD1,PAWR,PDXP,PGAM5,PLPP7,PPFIA2,PPFIA3,PPFIA4,PPIP5K1,PPM1H,PPM1K,PPP1CA,PPP1CC,PPP1R12A,PPP1R12C,PPP1R13B,PPP1R14A,PPP1R16B,PPP1R1A,PPP1R8,PPP2R3A,PPP2R5D,PPP2R5E,PPP3CA,PPP4C,PPP4R1,PRUNE1,PTEN,PTPA,PTPN1,PTPN11,PTPN12,PTPN2,PTPN6…
UVA-Induced MAPK Signaling	5.27	0.541	-1.061	BCL2L1,CASP3,CYCS,EGFR,JUN,KRAS,MAPK1,MAPK12,MAPK13,MAPK14,MAPK3,MAPK8,MRAS,PARP1,PARP10,PARP12,PARP4,PARP8,PARP9,PDIA3,PIK3C2A,PIK3C2G,PIK3C3,PIK3CA,PIK3CB,PIK3R1,PLCB1,PLCB3,PLCD3,PLCE1,PLCG2,PLCH1,PLCH2,PLCL1,PLCL2,PRKCA,RALA,RALB,RAP1B,RAP2B,RPS6KA1,RPS6KA4,RPS6KA6,RPS6KB1,RRAS,RRAS2,SMPD1,SMPD2,STAT1,TIPARP,TNKS,TNKS2,TP53
Mitotic Roles of Polo-Like Kinase	5.25	0.591	-1.606	ANAPC13,ANAPC5,CAPN1,CCNB1,CCNB2,CDC16,CDC23,CDC25A,CDC25B,CDC7,CDK1,CHEK2,ESPL1,FBXO5,FZR1,HSP90B1,KIF23,PKMYT1,PLK1,PLK2,PLK3,PPM1L,PPP2CA,PPP2CB,PPP2R1B,PPP2R2A,PPP2R2B,PPP2R2C,PPP2R3A,PPP2R5D,PPP2R5E,PTPA,PTTG1,RAD21,SMC1A,SMC3,STAG2,TGFB1,WEE1
IL-15 Signaling	5.25	0.573	-2.897	AKT1,AKT2,AKT3,BCL2L1,CSF2,CXCL8,GNB1L,IL15,IL15RA,JAK2,KRAS,LCK,MAP2K1,MAP2K2,MAPK1,MAPK12,MAPK13,MAPK14,MAPK3,MLST8,MRAS,NFKB1,NFKB2,PIK3C2A,PIK3C2G,PIK3C3,PIK3CA,PIK3CB,PIK3R1,RAC3,RAF1,RALA,RALB,RAP1B,RAP2B,RPS6KB1,RRAS,RRAS2,SHC1,STAT3,STAT5A,STAT6,SYK
Sumoylation Pathway	5.22	0.534	-1.581	ARHGDIA,ARHGDIB,ARHGDIG,CBX4,CDH1,CREBBP,CTBP2,DAXX,EP300,ETS1,FAS,HDAC1,ISG20,JUN,KDM1A,MAPK12,MAPK8,NFKB1,NFKB2,NFKBIA,NR3C1,PML,RAC1,RAC2,RAC3,RANBP2,RANGAP1,RCC1,RFC3,RHOA,RHOB,RHOBTB1,RHOBTB2,RHOC,RHOF,RHOQ,RHOT1,RHOT2,RHOU,RND2,RND3,RNF4,SENP5,SERBP1,SIRT1,SLC19A1,SP100,SP3,STUB1,SUMO3,TP53,UBE2I,XIAP,ZEB1,ZNF217
NF-κB Signaling	5.22	0.48	-2.929	AKT1,AKT2,AKT3,BCL10,BMP2,BMP4,BMPR2,CARD10,CARD11,CASP8,CREBBP,CSNK2A1,CSNK2A2,EGFR,EIF2AK2,EP300,FGFR1,FGFR3,FGFR4,FLT1,FLT4,GHR,GSK3B,HDAC1,IGF1R,IKBKB,IKBKG,IL18,IL1A,IL1B,IL1R1,IL36G,IL36RN,INSR,IRAK1,IRAK3,IRAK4,KRAS,LCK,MALT1,MAP3K14,MAP3K7,MAP3K8,MAP4K4,MAPK8,MRAS,MYD88,NFKB1,NFKB2,NFKBIA,NFKBID,NFKBIE,NGFR,NTRK2,PIK3C2A,PIK3C2G,PIK3C3,PIK3CA,PIK3CB,PIK3R1,PLCG2,RAF1,RALA,RALB,RAP1B,RAP2B…
α-Adrenergic Signaling	5.21	0.542	-0.707	ADCY1,ADCY3,ADCY6,ADCY7,ADCY9,CALM1 (includes others),CAMK4,GNAI1,GNAI2,GNAI3,GNB1,GNB1L,GNB2,GNB3,GNB4,GNB5,GNG12,GNG2,GNG4,GNG5,GNG7,ITPR1,ITPR3,KRAS,MAP2K1,MAP2K2,MAPK1,MAPK3,MRAS,PHKB,PHKG2,PLCG2,PRKAG2,PRKAR1A,PRKAR2A,PRKAR2B,PRKCA,PRKCD,PRKCH,PRKCI,PRKD1,PRKD3,PYGB,PYGL,RAF1,RALA,RALB,RAP1B,RAP2B,RRAS,RRAS2,SLC8A1
Apelin Endothelial Signaling Pathway	5.21	0.522	-1.807	ADCY1,ADCY3,ADCY6,ADCY7,ADCY9,AKT1,AKT2,AKT3,APLN,ARNT,CALM1 (includes others),CAMK4,GNA11,GNA13,GNAI1,GNAI2,GNAI3,GNAO1,HDAC5,HIF1A,ICAM1,JUN,KRAS,MAP2K1,MAP2K2,MAPK1,MAPK12,MAPK3,MAPK8,MEF2C,MEF2D,MRAS,NFKB1,NFKB2,PIK3C2A,PIK3C2G,PIK3C3,PIK3CA,PIK3CB,PIK3R1,PLCB1,PLCB3,PRKAA1,PRKAA2,PRKAG2,PRKCA,PRKCD,PRKCH,PRKCI,PRKD1,PRKD3,RAF1,RALA,RALB,RAP1B,RAP2B,RPS6KB1,RRAS,RRAS2,SMAD3
Natural Killer Cell Signaling	5.19	0.472	-3.837	AKT1,AKT2,AKT3,B2M,CD226,CFL1,COL11A2,COL18A1,COL1A1,COL2A1,COL3A1,FYN,GRB2,HLA-A,HLA-B,HLA-C,HLA-E,HSPA14,HSPA1A/HSPA1B,HSPA4,HSPA5,HSPA8,IL12A,IL12RB2,IL15,IL18,IRAK4,ITGB1,JAK2,KRAS,LCK,LIMK1,LIMK2,MAP2K1,MAP2K2,MAP3K11,MAP3K14,MAP3K15,MAP3K2,MAP3K6,MAP3K7,MAP3K8,MAP3K9,MAPK1,MAPK12,MAPK13,MAPK14,MAPK3,MICA,MICB,MRAS,MYD88,NCK1,NFATC1,NFATC3,NFATC4,NFKB1,NFKB2,PAK1,PAK2,PAK3,PAK4,PAK6,PIK3C2A,…
Cell Cycle: G2/M DNA Damage Checkpoint Regulation	5.14	0.633	0.756	ATR,AURKA,CCNB1,CCNB2,CDC25B,CDK1,CDK7,CHEK1,CHEK2,CKS1B,CUL1,EP300,FBXL5,GADD45A,MDM4,PKMYT1,PLK1,PPM1D,PRKDC,RPRM,RPS6KA1,SKP1,TOP2A,TOP2B,TP53,WEE1,YWHAB,YWHAE,YWHAG,YWHAQ,YWHAZ
PCP pathway	5.1	0.6	0	CELSR1,CTHRC1,DAAM1,DVL2,DVL3,EFNB1,FZD10,FZD2,FZD3,FZD4,FZD5,FZD6,FZD7,FZD8,FZD9,JUN,JUNB,LGR4,MAPK12,MAPK8,PFN1,PFN2,PRICKLE1,RAC1,RHOA,ROR2,SMO,VANGL1,WNT10B,WNT11,WNT3,WNT3A,WNT4,WNT5A,WNT7B,WNT9A
Corticotropin Releasing Hormone Signaling	5.1	0.497	-0.508	ADCY1,ADCY3,ADCY6,ADCY7,ADCY9,ARPC5,ATF4,BDNF,CACNA1B,CACNA1C,CACNA1G,CACNA1H,CACNA2D1,CACNA2D2,CACNA2D3,CACNB2,CACNB3,CACNB4,CACNG4,CACNG8,CALM1 (includes others),CAMK4,CREB1,CREB3,CREB5,CREBBP,CTH,GAD1,GLI1,GLI2,GNAI1,GNAI2,GNAI3,GNAO1,GUCY1A1,GUCY1A2,GUCY1B1,ITPR1,ITPR3,JUN,MAP2K1,MAP2K2,MAPK1,MAPK12,MAPK13,MAPK14,MAPK3,MEF2C,MEF2D,NOS2,NPR2,NR4A1,PLCG2,PRKAG2,PRKAR1A,PRKAR2A,PRKAR2B,PRKCA,PRK…
Salvage Pathways of Pyrimidine Ribonucleotides	5.03	0.536	-1.54	AK5,AK7,AK9,AKT2,APOBEC3B,CDA,CDADC1,CDK1,CDK18,CDK2,CDK5,CDK6,CDK7,CDK8,CMPK1,CMPK2,CSNK1A1,DAPK1,EIF2AK2,GRK4,GRK5,GRK6,IRAK1,LIMK1,LIMK2,MAK,MAP2K1,MAP2K2,MAP3K6,MAP3K8,MAP3K9,MAPK1,MAPK3,MAPK6,MAPK8,NME3,NME4,PAK1,PAK2,PAK3,PIM1,PKN1,PLK1,PRKAA1,PRKAA2,PRKCD,PRKCH,PRPF4B,PYCR3,SGK1,UCK2,UPP1
Cell Cycle: G1/S Checkpoint Regulation	5.03	0.582	-0.539	ATR,BMI1,CCND1,CCND3,CCNE2,CDC25A,CDK2,CDK6,CDKN1B,CDKN2B,CDKN2D,CUL1,E2F1,E2F2,E2F3,E2F5,E2F7,FBXL5,FOXO1,GNL3,GSK3B,HDAC1,HDAC5,HDAC7,HDAC8,HDAC9,MAX,PA2G4,RB1,RBL1,RPL11,RPL5,SIN3A,SKP1,SMAD3,TFDP1,TGFB1,TGFB2,TP53
Tight Junction Signaling	5.03	0.482	#NUM!	ACTB,ACTG1,AKT1,AKT2,AKT3,BET1L,CASK,CGN,CLDN1,CLDN11,CLDN12,CLDN15,CLDN16,CLDN23,CLDN4,CLDN7,CNKSR3,CPSF6,CRB3,CSTF1,CSTF2,CSTF3,CTNNA1,CTNNB1,EPB41,F11R,GOSR1,GOSR2,JAM2,JAM3,JUN,MARK2,MPP5,MYH10,MYH3,MYH9,MYL6,MYL6B,MYL9,NAPA,NAPG,NECTIN1,NECTIN3,NFKB1,NFKB2,NGFR,NSF,OCLN,PATJ,PPM1L,PPP2CA,PPP2CB,PPP2R1B,PPP2R2A,PPP2R2B,PPP2R2C,PPP2R3A,PPP2R5D,PPP2R5E,PRKAG2,PRKAR1A,PRKAR2A,PRKAR2B,PRKCI,PTEN,…
Dopamine-DARPP32 Feedback in cAMP Signaling	5.02	0.485	1.434	ADCY1,ADCY3,ADCY6,ADCY7,ADCY9,ATF4,ATP2A1,ATP2A2,ATP2A3,CACNA1C,CALM1 (includes others),CAMK4,CAMKK2,CDK5,CHP1,CREB1,CREB3,CREB5,CREBBP,CSNK1A1,CSNK1E,CSNK1G1,CSNK1G2,GNAI1,GNAI2,GNAI3,GRIN2C,GRIN2D,GRINA,GUCY1A1,GUCY1A2,GUCY1B1,ITPR1,ITPR3,KCNJ11,KCNJ15,KCNJ4,KCNJ8,PAWR,PDIA3,PLCB1,PLCB3,PLCD3,PLCE1,PLCG2,PLCH1,PLCH2,PLCL1,PLCL2,PPM1L,PPP1CA,PPP1CB,PPP1CC,PPP1R12A,PPP1R14A,PPP1R3D,PPP2CA,PPP2CB,…
Xenobiotic Metabolism Signaling	5.01	0.443	#NUM!	ABCB1,ABCC3,AHR,AIP,ALDH16A1,ALDH18A1,ALDH1A2,ALDH1A3,ALDH1L2,ALDH3B1,ALDH4A1,ALDH5A1,ALDH6A1,ALDH7A1,ALDH9A1,ANKRA2,ARNT,CAMK1,CAMK2B,CAMK2G,CAMK4,CAT,CES3,CES4A,CHST11,CHST15,CHST2,CHST3,CREBBP,CYP1B1,DNAJC7,EP300,ESD,FTL,GSTA4,GSTM2,GSTO1,GSTO2,GSTP1,GSTT2/GSTT2B,GSTZ1,HDAC5,HMOX1,HS3ST1,HS3ST3A1,HS3ST3B1,HS6ST1,HS6ST3,HSP90B1,IL1A,IL1B,IL6,KEAP1,KRAS,MAF,MAOA,MAP2K1,MAP2K2,MAP3K11,MAP3K14,MAP…
Role of NFAT in Regulation of the Immune Response	4.98	0.475	-2.321	AKT1,AKT2,AKT3,CABIN1,CALM1 (includes others),CAMK4,CHP1,CSNK1A1,CSNK1E,CSNK1G1,CSNK1G2,ELP1,FYN,GATA4,GNA11,GNA12,GNA13,GNA15,GNAI1,GNAI2,GNAI3,GNAO1,GNAZ,GNB1,GNB1L,GNB2,GNB3,GNB4,GNB5,GNG12,GNG2,GNG4,GNG5,GNG7,GRB2,GSK3B,HLA-A,HLA-B,HLA-DOA,IKBKB,IKBKE,IKBKG,ITPR1,ITPR3,JUN,KRAS,LCK,LYN,MAP2K1,MAP2K2,MAPK1,MAPK3,MEF2C,MEF2D,MRAS,NFATC1,NFATC3,NFATC4,NFKB1,NFKB2,NFKBIA,NFKBID,NFKBIE,ORAI1,PIK3C…
Regulation of Cellular Mechanics by Calpain Protease	4.98	0.585	-2.556	ACTN1,ACTN2,ACTN4,CAPN1,CAPN10,CAPN2,CAPN5,CAPNS1,CAST,CCNA1,CCND1,CDK1,CDK2,CDK6,CDKN1B,CNGA1,EGFR,EZR,GRB2,ITGA2,ITGA3,ITGA4,ITGA5,ITGB1,KRAS,MAPK1,MAPK3,MRAS,PXN,RALA,RALB,RAP1B,RAP2B,RB1,RRAS,RRAS2,SRC,TLN1
GP6 Signaling Pathway	4.96	0.513	-0.384	ADAM10,AKT1,AKT2,AKT3,CALM1 (includes others),CAMK4,COL11A2,COL12A1,COL13A1,COL16A1,COL18A1,COL19A1,COL1A1,COL24A1,COL25A1,COL26A1,COL2A1,COL3A1,COL4A1,COL4A2,COL4A4,COL4A5,COL4A6,COL5A1,COL6A1,COL6A2,COL7A1,COL8A1,COL8A2,COL9A2,FGB,FYN,GSK3B,ITPR1,LAMA1,LAMA3,LAMA4,LAMA5,LAMB1,LAMC1,LAMC3,LYN,PIK3C2A,PIK3C2G,PIK3C3,PIK3CA,PIK3CB,PIK3R1,PLCG2,PRKCA,PRKCD,PRKCH,PRKCI,PRKD1,PRKD3,RAC1,RAP1B,RASGRP2…
CCR3 Signaling in Eosinophils	4.94	0.508	-1.622	CALM1 (includes others),CAMK4,CFL1,GNAI1,GNAI2,GNAI3,GNB1,GNB1L,GNB2,GNB3,GNB4,GNB5,GNG12,GNG2,GNG4,GNG5,GNG7,ITPR1,ITPR3,KRAS,LIMK1,LIMK2,MAP2K1,MAP2K2,MAPK1,MAPK12,MAPK13,MAPK14,MAPK3,MPRIP,MRAS,PAK1,PAK2,PAK3,PAK4,PAK6,PIK3C2A,PIK3C2G,PIK3C3,PIK3CA,PIK3CB,PIK3R1,PLA2G4A,PLA2G6,PLCB1,PLCB3,PPP1CB,PPP1R12A,PRKCA,PRKCD,PRKCH,PRKCI,PRKD1,PRKD3,RAC1,RAF1,RALA,RALB,RAP1B,RAP2B,RHOA,RRAS,RRAS2
Thyroid Cancer Signaling	4.91	0.557	-0.603	AKT1,AKT2,AKT3,BDNF,CCND1,CDH1,CTNNB1,CXCL8,CXCR4,FOXO1,GDNF,GSK3B,INSR,IRS1,IRS2,JUN,KRAS,LEF1,MAP2K1,MAP2K2,MAPK1,MAPK3,MRAS,NTF4,NTRK2,PDK1,PIK3C2A,PIK3C2G,PIK3C3,PIK3CA,PIK3CB,PIK3R1,PTEN,RALA,RALB,RAP1B,RAP2B,RRAS,RRAS2,SHC1,TCF4,TCF7,TCF7L1,TP53
Role of PKR in Interferon Induction and Antiviral Response	4.9	0.513	-3.046	BID,CASP1,CASP3,CASP8,COLEC12,CYCS,DDX58,DNAJC3,E2F1,EIF2AK2,EIF2S1,FAS,HMGB1,HSP90B1,HSPA14,HSPA1A/HSPA1B,HSPA4,HSPA5,HSPA8,IFIH1,IFNGR1,IKBKB,IKBKE,IKBKG,IL18,IL1B,IL24,IRF1,IRF3,IRF9,JUN,MAP3K7,MAPK1,MAPK12,MAPK13,MAPK14,MAPK3,MAPK8,MAVS,METAP2,MYD88,NFKB1,NFKB2,NFKBIA,NFKBID,NFKBIE,NPM1,PDGFA,PDGFB,PDGFC,PDGFD,PYCARD,SCARA3,STAT1,STAT2,STAT3,TIRAP,TLR3,TNFRSF1A,TP53
Death Receptor Signaling	4.85	0.538	-2.48	ACTB,ACTG1,ARHGDIB,BID,BIRC2,BIRC3,CASP10,CASP3,CASP6,CASP7,CASP8,CFLAR,CYCS,DAXX,DFFA,DFFB,FAS,HSPB1,IKBKB,IKBKE,IKBKG,LIMK1,LMNA,MAP3K14,MAP4K4,MAPK8,NFKB1,NFKB2,NFKBIA,NFKBID,NFKBIE,PARP1,PARP10,PARP12,PARP4,PARP8,PARP9,TANK,TBK1,TIPARP,TNFRSF10A,TNFRSF1A,TNFRSF21,TNFRSF25,TNFSF15,TNKS,TNKS2,TRADD,XIAP
Role of Oct4 in Mammalian Embryonic Stem Cell Pluripotency	4.8	0.63	-0.333	ASH2L,BMI1,CASP6,CCNF,CDX2,ETS2,FOXA1,FOXD3,IGF2BP1,JARID2,NR2F1,NR2F2,NR5A2,NR6A1,PARP1,PCGF6,PHC3,POU5F1,PPP1R8,RB1,REST,SH3GLB1,SOX2,SPP1,TASOR,TDRD7,TP53,UTF1,WWP2
FAT10 Cancer Signaling Pathway	4.8	0.63	-2.043	ACVR1,ACVR2B,AKT1,AKT2,AKT3,BMPR2,CTNNB1,CXCR4,GSK3B,HOXB9,IKBKB,IKBKE,IKBKG,IL6,MAD2L2,NFKB1,NFKB2,NFKBIA,NGFR,SMAD2,SMAD3,STAT3,TCF4,TGFB1,TGFB2,TGFBR2,TGFBR3,TNFRSF1A,TP53
Angiopoietin Signaling	4.79	0.56	-1.521	AKT1,AKT2,AKT3,BAD,BIRC5,ELP1,FOXO1,GRB14,GRB2,GRB7,IKBKB,IKBKE,IKBKG,KRAS,MRAS,NCK1,NFKB1,NFKB2,NFKBIA,NFKBID,NFKBIE,PAK1,PAK2,PAK3,PAK4,PAK6,PIK3C2A,PIK3C2G,PIK3C3,PIK3CA,PIK3CB,PIK3R1,PTPN11,RALA,RALB,RAP1B,RAP2B,RASA1,RRAS,RRAS2,STAT5A,TNIP1
Hereditary Breast Cancer Signaling	4.77	0.493	#NUM!	ACTB,AKT1,AKT2,AKT3,ATR,BLM,BRCA2,CCNB1,CCND1,CDK1,CDK6,CHEK1,CHEK2,CREBBP,DDB2,DPF1,E2F1,EP300,FANCD2,FANCF,GADD45A,GADD45B,H2AX,HDAC1,HDAC5,HDAC7,HDAC8,HDAC9,KRAS,MLH1,MRAS,MSH2,MSH6,NBN,NPM1,PBRM1,PHF10,PIK3C2A,PIK3C2G,PIK3C3,PIK3CA,PIK3CB,PIK3R1,POLR2B,POLR2D,POLR2F,POLR2J2/POLR2J3,POLR2K,PTEN,RALA,RALB,RAP1B,RAP2B,RB1,RFC3,RRAS,RRAS2,SLC19A1,SMARCA2,SMARCA4,SMARCB1,SMARCC1,SMARCD2,SMARCD3,TP…
Fcγ Receptor-mediated Phagocytosis in Macrophages and Monocytes	4.74	0.532	-2.828	ACTB,ACTG1,ACTR3,AKT1,AKT2,AKT3,ARF6,ARPC1A,ARPC2,ARPC3,ARPC5,ARPC5L,CBL,CSF2,EZR,FYN,GPLD1,HMOX1,INPP5D,LYN,MAPK1,MAPK3,MYO5A,NCK1,PAK1,PIK3C2G,PIK3R1,PLA2G6,PLD2,PLD6,PRKCA,PRKCD,PRKCH,PRKCI,PRKD1,PRKD3,PTEN,PTK2B,PXN,RAB11B,RAC1,RAC2,RAC3,RPS6KB1,SRC,SYK,TLN1,VASP,VAV2,YES1
RhoA Signaling	4.74	0.504	-3.474	ABL2,ACTB,ACTG1,ACTR3,ANLN,ARHGAP1,ARHGAP35,ARHGAP5,ARHGEF1,ARHGEF12,ARPC1A,ARPC2,ARPC3,ARPC5,ARPC5L,BAIAP2,CDC42EP3,CDC42EP4,CDC42EP5,CFL1,EPHA1,EZR,GNA12,GNA13,IGF1R,KTN1,LIMK1,LIMK2,LPAR1,LPAR2,LPAR3,LPAR5,LPAR6,MPRIP,MSN,MYL12A,MYL12B,MYL6,MYL6B,MYL9,NEDD4,NGEF,NRP2,PFN1,PFN2,PI4KA,PIP4K2B,PIP4K2C,PIP5K1B,PKN1,PLEKHG5,PLXNA1,PPP1CB,PPP1R12A,PTK2B,RDX,RHOA,RHPN1,RHPN2,RND3,SEMA3F,WASF1
Caveolar-mediated Endocytosis Signaling	4.74	0.562	#NUM!	ACTB,ACTG1,ARCN1,B2M,CAV1,CAVIN1,COPB2,COPG1,COPG2,COPZ1,DYRK3,EGFR,FLNA,FLNB,FLNC,FLOT2,FYN,HLA-A,HLA-B,HLA-C,HLA-E,INSR,ITGA1,ITGA2,ITGA3,ITGA4,ITGA5,ITGA6,ITGA7,ITGA8,ITGA9,ITGAV,ITGB1,ITGB5,ITGB8,MAP3K2,PRKCA,PTPN1,RAB5B,SRC,ZBTB12
JAK/Stat Signaling	4.72	0.55	-2.412	AKT1,AKT2,AKT3,BCL2L1,CEBPB,GRB2,IL6,JAK2,JUN,KRAS,MAP2K1,MAP2K2,MAPK1,MAPK3,MRAS,NFKB1,NFKB2,PIAS3,PIK3C2A,PIK3C2G,PIK3C3,PIK3CA,PIK3CB,PIK3R1,PTPN1,PTPN11,PTPN6,RAF1,RALA,RALB,RAP1B,RAP2B,RRAS,RRAS2,SHC1,SOCS2,SOCS3,SOCS6,SOS2,STAT1,STAT2,STAT3,STAT5A,STAT6
Hepatic Fibrosis / Hepatic Stellate Cell Activation	4.7	0.468	#NUM!	AGTR1,BAMBI,CCN2,CD14,COL11A2,COL12A1,COL13A1,COL16A1,COL18A1,COL19A1,COL1A1,COL24A1,COL25A1,COL26A1,COL2A1,COL3A1,COL4A1,COL4A2,COL4A4,COL4A5,COL4A6,COL5A1,COL6A1,COL6A2,COL7A1,COL8A1,COL8A2,COL9A2,CSF1,CXCL2,CXCL8,ECE1,EDN1,EGFR,FAS,FGF2,FGFR1,FLT1,FLT4,FN1,ICAM1,IFNGR1,IGF1R,IGFBP3,IGFBP4,IGFBP5,IL1A,IL1B,IL1R1,IL1RAP,IL1RL1,IL1RL2,IL4R,IL6,KLF6,LAMA1,LEPR,LHX2,MET,MMP2,MYH10,MYH3,MYH9,MYL6,MY…
VDR/RXR Activation	4.66	0.551	-0.928	CCNC,CD14,CDKN1B,CEBPB,COL13A1,CSF2,CSNK2A1,CYP24A1,CYP27B1,EP300,FOXO1,GADD45A,HOXA10,HR,IGFBP3,IGFBP5,IGFBP6,IL12A,IL1RL1,KLK6,MXD1,NCOA2,NCOA3,NCOR2,PDGFA,PPARD,PRKCA,PRKCD,PRKCH,PRKCI,PRKD1,PRKD3,PSMC5,RUNX2,RXRA,RXRG,SEMA3B,SERPINB1,SPP1,TGFB2,THBD,VDR,WT1
Synaptic Long Term Potentiation	4.59	0.496	0	ADCY1,ATF4,CACNA1C,CALM1 (includes others),CAMK2B,CAMK2G,CAMK4,CHP1,CREB1,CREB3,CREB5,CREBBP,EP300,GNA11,GNA15,GRIN2C,GRIN2D,GRINA,ITPR1,ITPR3,KRAS,MAP2K1,MAP2K2,MAPK1,MAPK3,MRAS,PDIA3,PLCB1,PLCB3,PLCD3,PLCE1,PLCG2,PLCH1,PLCH2,PLCL1,PLCL2,PPP1CA,PPP1CB,PPP1CC,PPP1R12A,PPP1R14A,PPP1R1A,PPP1R3D,PPP3CA,PPP3R1,PRKAG2,PRKAR1A,PRKAR2A,PRKAR2B,PRKCA,PRKCD,PRKCH,PRKCI,PRKD1,PRKD3,RAF1,RALA,RALB,RAP1B,RAP…
White Adipose Tissue Browning Pathway	4.59	0.496	2.394	ADCY1,ADCY3,ADCY6,ADCY7,ADCY9,ATF4,BDNF,BMP7,CACNA1B,CACNA1C,CACNA1G,CACNA1H,CACNA2D1,CACNA2D2,CACNA2D3,CACNB2,CACNB3,CACNB4,CACNG4,CACNG8,CAMKK2,CEBPB,CREB1,CREB3,CREB5,CREBBP,CTBP2,FGFR1,FGFR3,FGFR4,FOXC2,GUCY1A1,GUCY1A2,GUCY1B1,HIF1AN,HOXC9,LDHC,LIPE,MAPK1,MAPK12,MAPK13,MAPK14,NDN,PPARA,PPARG,PPARGC1A,PRDM16,PRKAA1,PRKAA2,PRKAG2,PRKAR1A,PRKAR2A,PRKAR2B,PRKG1,RARB,RARG,RUNX1T1,RXRA,RXRG,SIRT1,S…
Ceramide Signaling	4.56	0.534	-1.543	AKT1,AKT2,AKT3,BAD,CERK,CNKSR1,CTSD,CYCS,JUN,KRAS,MAP2K1,MAPK3,MAPK8,MRAS,NFKB1,NFKB2,NGFR,PIK3C2A,PIK3C2G,PIK3C3,PIK3CA,PIK3CB,PIK3R1,PPM1L,PPP2CA,PPP2CB,PPP2R1B,PPP2R2A,PPP2R2B,PPP2R2C,PPP2R3A,PPP2R5D,PPP2R5E,PTPA,RAF1,RALA,RALB,RAP1B,RAP2B,RRAS,RRAS2,S1PR5,SMPD1,SMPD2,SMPD5,SPHK1,TNFRSF1A
Ephrin A Signaling	4.55	0.617	#NUM!	ADAM10,BCAR1,CFL1,EFNA1,EFNA2,EFNA3,EPHA1,EPHA2,EPHA3,EPHA4,EPHA5,EPHA6,EPHA7,EPHA8,FYN,LIMK1,NGEF,NGFR,PAK1,PIK3C2A,PIK3C2G,PIK3C3,PIK3CA,PIK3CB,PIK3R1,PTPN11,RAC1,RHOA,VAV2
Leptin Signaling in Obesity	4.55	0.554	-1.279	ADCY1,ADCY3,ADCY6,ADCY7,ADCY9,AKT1,AKT2,AKT3,FOXO1,GRB2,JAK2,LEPR,MAP2K1,MAP2K2,MAPK1,MAPK3,PDE3A,PDE3B,PDIA3,PIK3C2A,PIK3C2G,PIK3C3,PIK3CA,PIK3CB,PIK3R1,PLCB1,PLCB3,PLCD3,PLCE1,PLCG2,PLCH1,PLCH2,PLCL1,PLCL2,PRKAG2,PRKAR1A,PRKAR2A,PRKAR2B,PTPN11,SOCS3,STAT3
Hypoxia Signaling in the Cardiovascular System	4.55	0.554	-0.688	AKT1,ARNT,ATF4,CDC34,CREB1,CREB3,CREB5,CREBBP,EDN1,EP300,HIF1A,HIF1AN,HSP90B1,JUN,NFKBIA,NFKBID,NFKBIE,NQO1,P4HB,PTEN,SLC2A4,TP53,UBE2B,UBE2C,UBE2D2,UBE2D3,UBE2E1,UBE2E2,UBE2E3,UBE2F,UBE2G2,UBE2H,UBE2I,UBE2K,UBE2L6,UBE2O,UBE2Q2,UBE2W,UBE2Z,VEGFA,VHL
Gap Junction Signaling	4.52	0.46	#NUM!	ACTB,ACTG1,ADCY1,ADCY3,ADCY6,ADCY7,ADCY9,AKT1,AKT2,AKT3,CAV1,CSNK1A1,CSNK1E,CSNK1G1,CSNK1G2,CTH,CTNNB1,DBN1,EGFR,GAD1,GJB3,GJB6,GJB7,GJC1,GNAI1,GNAI2,GNAI3,GRB2,GUCY1A1,GUCY1A2,GUCY1B1,HTR2C,ITPR1,ITPR3,KRAS,LPAR1,MAP2K1,MAP2K2,MAP3K2,MAPK1,MAPK3,MRAS,NPR2,PDIA3,PIK3C2A,PIK3C2G,PIK3C3,PIK3CA,PIK3CB,PIK3R1,PLCB1,PLCB3,PLCD3,PLCE1,PLCG2,PLCH1,PLCH2,PLCL1,PLCL2,PPP3CA,PPP3R1,PRKAG2,PRKAR1A,PRKAR2A,P…
iNOS Signaling	4.51	0.622	-2.449	CALM1 (includes others),CAMK4,CD14,CREBBP,HMGA1,IFNGR1,IKBKB,IKBKE,IKBKG,IRAK1,IRAK3,IRAK4,IRF1,JAK2,JUN,MAPK1,MAPK12,MAPK13,MAPK14,MYD88,NFKB1,NFKB2,NFKBIA,NFKBID,NFKBIE,NOS2,STAT1,TAB1
Netrin Signaling	4.51	0.569	1.48	ABLIM1,ABLIM2,ABLIM3,CACNA1B,CACNA1C,CACNA1G,CACNA1H,CACNA2D1,CACNA2D2,CACNA2D3,CACNB2,CACNB3,CACNB4,CACNG4,CACNG8,CHP1,ENAH,NCK1,NFATC1,NFATC3,NFATC4,NTN1,PPP3CA,PPP3R1,PRKAG2,PRKAR1A,PRKAR2A,PRKAR2B,PRKG1,RAC1,RAC2,RAC3,RYR1,RYR2,UNC5A,UNC5B,UNC5C
Clathrin-mediated Endocytosis Signaling	4.5	0.461	#NUM!	AAK1,ACTB,ACTG1,ACTR3,AMPH,AP1G2,AP1S1,AP1S2,AP2A1,AP2A2,AP2B1,AP2M1,AP2S1,ARF6,ARPC1A,ARPC2,ARPC3,ARPC5,ARPC5L,ARRB1,ARRB2,CBL,CD2AP,CHP1,CLTB,CLTC,CLTCL1,CSNK2A1,CSNK2A2,CTTN,DNM1,EPHB2,EPN1,FGF13,FGF2,FGF5,FGF9,GRB2,HGS,HIP1,HIP1R,HSPA8,ITGA5,ITGB1,ITGB5,ITGB8,LDLR,LDLRAP1,MET,MYO1E,MYO6,NUMB,PDGFA,PDGFB,PDGFC,PDGFD,PICALM,PIK3C2A,PIK3C2G,PIK3C3,PIK3CA,PIK3CB,PIK3R1,PPP3CA,PPP3R1,RAB11B,RAB4A,…
PDGF Signaling	4.49	0.535	-2.949	ABL2,CAV1,CSNK2A1,CSNK2A2,EIF2AK2,GRB2,INPP5B,INPP5D,INPP5F,INPP5J,JAK2,JUN,KRAS,MAP2K1,MAP2K2,MAPK1,MAPK3,MAPK8,MRAS,PDGFA,PDGFB,PDGFC,PDGFD,PIK3C2A,PIK3C2G,PIK3C3,PIK3CA,PIK3CB,PIK3R1,PLCG2,PRKCA,RAF1,RALA,RALB,RAP1B,RAP2B,RASA1,RRAS,RRAS2,SHC1,SOS2,SPHK1,SRC,STAT1,STAT3,SYNJ2
Endocannabinoid Neuronal Synapse Pathway	4.39	0.492	0.896	ABHD6,ADCY1,ADCY3,ADCY6,ADCY7,ADCY9,CACNA1B,CACNA1C,CACNA1G,CACNA1H,CACNA2D1,CACNA2D2,CACNA2D3,CACNB2,CACNB3,CACNB4,CACNG4,CACNG8,CHP1,GNA11,GNA15,GNAI1,GNAI2,GNAI3,GNAO1,GNB1,GNB3,GNG2,GNG5,GNG7,GRIN2C,GRIN2D,GRINA,ITPR1,MAPK1,MAPK12,MAPK13,MAPK14,MAPK15,MAPK3,MAPK4,MAPK6,MAPK8,MGLL,NDUFS2,PDIA3,PLCB1,PLCB3,PLCD3,PLCE1,PLCG2,PLCH1,PLCH2,PLCL1,PLCL2,PPP3CA,PPP3R1,PRKAG2,PRKAR1A,PRKAR2A,PRKAR2B,PT…
LPS-stimulated MAPK Signaling	4.37	0.537	-2.111	CD14,CREB1,IKBKB,IKBKE,IKBKG,JUN,KRAS,MAP2K1,MAP2K2,MAP3K14,MAP3K7,MAPK1,MAPK12,MAPK13,MAPK14,MAPK3,MAPK8,MRAS,NFKB1,NFKB2,NFKBIA,NFKBID,NFKBIE,PAK1,PIK3C2A,PIK3C2G,PIK3C3,PIK3CA,PIK3CB,PIK3R1,PRKCA,PRKCD,PRKCH,PRKCI,PRKD1,PRKD3,RAC1,RAF1,RALA,RALB,RAP1B,RAP2B,RRAS,RRAS2
Melanoma Signaling	4.35	0.6	-1.732	AKT1,AKT2,AKT3,BAD,CCND1,CDH1,E2F1,KRAS,MAP2K1,MAP2K2,MAPK1,MAPK3,MITF,MRAS,PIK3C2A,PIK3C2G,PIK3C3,PIK3CA,PIK3CB,PIK3R1,PTEN,RAF1,RALA,RALB,RAP1B,RAP2B,RB1,RRAS,RRAS2,TP53
TNFR1 Signaling	4.35	0.6	-2.785	BID,BIRC2,BIRC3,CASP3,CASP6,CASP7,CASP8,CYCS,IKBKB,IKBKE,IKBKG,JUN,MAP3K14,MAP4K2,MAPK8,NFKB1,NFKB2,NFKBIA,NFKBID,NFKBIE,PAK1,PAK2,PAK3,PAK4,PAK6,TANK,TNFAIP3,TNFRSF1A,TRADD,XIAP
Nitric Oxide Signaling in the Cardiovascular System	4.33	0.515	0.289	AKT1,AKT2,AKT3,ARG2,ATP2A1,ATP2A2,ATP2A3,BDKRB2,CACNA1C,CALM1 (includes others),CAMK4,CAV1,FLT1,FLT4,GUCY1A1,GUCY1A2,GUCY1B1,HSP90B1,ITPR1,ITPR3,MAP2K1,MAP2K2,MAPK1,MAPK3,PDE1B,PDE2A,PDE3B,PDGFC,PIK3C2A,PIK3C2G,PIK3C3,PIK3CA,PIK3CB,PIK3R1,PRKAA1,PRKAG2,PRKAR1A,PRKAR2A,PRKAR2B,PRKCA,PRKCD,PRKCH,PRKCI,PRKD1,PRKD3,PRKG1,RYR2,SLC7A1,VEGFA,VEGFB,VEGFC
IL-7 Signaling Pathway	4.25	0.538	-2.197	AKT1,AKT2,AKT3,BAD,BAK1,CCND1,CCND3,CDC25A,CDK2,CDKN1B,CXCR5,EBF1,FOXG1,FOXO1,FOXO4,FOXO6,FYN,GRB2,GSK3B,IL7,IL7R,JUN,LYN,MAPK1,MAPK12,MAPK13,MAPK14,MAPK3,MCL1,MET,NFATC1,PIK3C2A,PIK3C2G,PIK3C3,PIK3CA,PIK3CB,PIK3R1,SHC1,SLC2A1,SOS2,STAT1,STAT5A
EGF Signaling	4.23	0.582	-1.768	AKT1,AKT2,AKT3,CSNK2A1,CSNK2A2,EGFR,GRB2,ITPR1,ITPR3,JUN,MAP2K1,MAPK1,MAPK12,MAPK13,MAPK14,MAPK3,MAPK8,PIK3C2A,PIK3C2G,PIK3C3,PIK3CA,PIK3CB,PIK3R1,PRKCA,RAF1,RASA1,RPS6KB1,SHC1,SOS2,SRC,STAT1,STAT3
Macropinocytosis Signaling	4.19	0.539	-2.335	ABI1,ACTN4,ARF6,CD14,CSF1,CSF1R,ITGA5,ITGB1,ITGB5,ITGB8,KRAS,MET,MRAS,PAK1,PDGFA,PDGFB,PDGFC,PDGFD,PIK3C2A,PIK3C2G,PIK3C3,PIK3CA,PIK3CB,PIK3R1,PLCG2,PRKCA,PRKCD,PRKCH,PRKCI,PRKD1,PRKD3,RAB34,RAC1,RALA,RALB,RAP1B,RAP2B,RHOA,RRAS,RRAS2,SRC
UVC-Induced MAPK Signaling	4.12	0.588	-1.3	ATR,EGFR,JUN,KRAS,MAP2K1,MAP2K2,MAPK1,MAPK12,MAPK13,MAPK14,MAPK3,MAPK8,MRAS,PRKCA,PRKCD,PRKCH,PRKCI,PRKD1,PRKD3,RAF1,RALA,RALB,RAP1B,RAP2B,RRAS,RRAS2,SMPD1,SMPD2,SRC,TP53
Synaptic Long Term Depression	4.12	0.455	0.883	CACNA1B,CACNA1C,CACNA1G,CACNA1H,CACNA2D1,CACNA2D2,CACNA2D3,CACNB2,CACNB3,CACNB4,CACNG4,CACNG8,CTH,GAD1,GNA11,GNA12,GNA13,GNA15,GNAI1,GNAI2,GNAI3,GNAO1,GNAZ,GRID1,GUCY1A1,GUCY1A2,GUCY1B1,IGF1R,ITPR1,ITPR3,KRAS,LCAT,LYN,MAP2K1,MAP2K2,MAPK1,MAPK3,MRAS,NOS2,NPR2,PDIA3,PLA2G4A,PLA2G6,PLA2G7,PLA2R1,PLAAT3,PLAAT4,PLCB1,PLCB3,PLCD3,PLCE1,PLCG2,PLCH1,PLCH2,PLCL1,PLCL2,PNPLA3,PNPLA8,PPM1L,PPP2CA,PPP2CB,PPP…
IL-17A Signaling in Airway Cells	4.06	0.554	-1.567	AKT1,AKT2,AKT3,CXCL1,CXCL2,CXCL3,GSK3B,IKBKB,IKBKE,IKBKG,IL17RC,IL6,JAK2,MAP2K1,MAP2K2,MAP3K7,MAPK1,MAPK12,MAPK13,MAPK14,MAPK3,MAPK8,NFKB1,NFKB2,NFKBIA,NFKBID,NFKBIE,PIK3C2A,PIK3C2G,PIK3C3,PIK3CA,PIK3CB,PIK3R1,PTEN,STAT3,TRAF3IP2
ErbB2-ErbB3 Signaling	4.06	0.554	-2.744	AKT1,BAD,CCND1,CDKN1B,ERBB2,ERBB3,ETV4,FOXO1,GRB2,GSK3B,JUN,KRAS,MAP2K1,MAP2K2,MAPK1,MAPK3,MRAS,NRG4,PIK3C2A,PIK3C2G,PIK3C3,PIK3CA,PIK3CB,PIK3R1,PTEN,RAF1,RALA,RALB,RAP1B,RAP2B,RRAS,RRAS2,SHC1,SOS2,STAT3,STAT5A
Cardiac β-adrenergic Signaling	4.03	0.475	1.896	ADCY1,ADCY3,ADCY6,ADCY7,ADCY9,AKAP1,AKAP9,ATP2A1,ATP2A2,ATP2A3,CACNA1C,GDE1,GDPD1,GNB1,GNB1L,GNB2,GNB3,GNB4,GNB5,GNG12,GNG2,GNG4,GNG5,GNG7,GRK2,GRK3,MPPE1,MPPED2,MRAS,PALM2AKAP2,PDE10A,PDE11A,PDE12,PDE1B,PDE2A,PDE3A,PDE3B,PDE4D,PDE8A,PKIG,PLD6,PPM1L,PPP1CA,PPP1CB,PPP1CC,PPP1R12A,PPP1R14A,PPP1R1A,PPP1R3D,PPP2CA,PPP2CB,PPP2R1B,PPP2R2A,PPP2R2B,PPP2R2C,PPP2R3A,PPP2R5D,PPP2R5E,PRKAG2,PRKAR1A,PRKAR2A,P…
Inhibition of Angiogenesis by TSP1	4.02	0.647	-1.5	AKT1,AKT2,AKT3,CASP3,CD47,FYN,GUCY1A1,GUCY1A2,GUCY1B1,HSPG2,JUN,MAPK1,MAPK12,MAPK13,MAPK14,MAPK8,SDC1,SDC2,TGFB1,TGFBR2,TP53,VEGFA
Antiproliferative Role of Somatostatin Receptor 2	4.01	0.532	-1.512	CDKN1B,CTH,GAD1,GNB1,GNB1L,GNB2,GNB3,GNB4,GNB5,GNG12,GNG2,GNG4,GNG5,GNG7,GUCY1A1,GUCY1A2,GUCY1B1,KRAS,MAP2K1,MAP2K2,MAPK1,MAPK3,MRAS,NPR2,PIK3C2A,PIK3C2G,PIK3C3,PIK3CA,PIK3CB,PIK3R1,PTPN11,PTPN6,RALA,RALB,RAP1B,RAP2B,RRAS,RRAS2,SOX15,SRC,SSTR2
CTLA4 Signaling in Cytotoxic T Lymphocytes	4.01	0.517	#NUM!	AKT1,AKT2,AKT3,AP1G2,AP1S1,AP1S2,AP1S3,AP2A1,AP2A2,AP2B1,AP2M1,AP2S1,B2M,CD8A,CLTB,CLTC,CLTCL1,FYN,GRB2,HLA-A,HLA-B,HLA-C,HLA-E,JAK2,LCK,PIK3C2A,PIK3C2G,PIK3C3,PIK3CA,PIK3CB,PIK3R1,PPM1L,PPP2CA,PPP2CB,PPP2R1B,PPP2R2A,PPP2R2B,PPP2R2C,PPP2R3A,PPP2R5D,PPP2R5E,PTPA,PTPN11,PTPN6,SYK,ZBTB12
Acute Myeloid Leukemia Signaling	4.01	0.517	-1.622	AKT1,AKT2,AKT3,BAD,CCNA1,CCND1,CSF1R,EIF4EBP1,GRB2,IDH2,IDH3G,JUP,KIT,KRAS,LEF1,MAP2K1,MAP2K2,MAPK1,MAPK3,MRAS,NFKB1,NFKB2,PIK3C2A,PIK3C2G,PIK3C3,PIK3CA,PIK3CB,PIK3R1,PIM1,PIM2,PML,RAF1,RALA,RALB,RAP1B,RAP2B,RPS6KB1,RRAS,RRAS2,RUNX1,SOS2,STAT3,STAT5A,TCF4,TCF7,TCF7L1
Regulation of IL-2 Expression in Activated and Anergic T Lymphocytes	4.01	0.517	#NUM!	BCL10,CALM1 (includes others),CAMK4,CARD11,CHP1,FYN,GRB2,IKBKB,IKBKE,IKBKG,JUN,KRAS,MALT1,MAP2K1,MAP2K2,MAPK1,MAPK12,MAPK3,MAPK8,MRAS,NFATC1,NFATC3,NFATC4,NFKB1,NFKB2,NFKBIA,NFKBID,NFKBIE,PLCG2,PPP3CA,PPP3R1,RAC1,RAF1,RALA,RALB,RAP1B,RAP2B,RRAS,RRAS2,SMAD2,SMAD3,SOS2,TGFB1,TGFB2,TGFBR2,VAV2
Thrombopoietin Signaling	4	0.556	-1.859	GRB2,IRS2,JAK2,JUN,KRAS,MAP2K1,MAP2K2,MAPK1,MAPK3,MRAS,PIK3C2A,PIK3C2G,PIK3C3,PIK3CA,PIK3CB,PIK3R1,PLCG2,PRKCA,PRKCD,PRKCH,PRKCI,PRKD1,PRKD3,PTPN11,RAF1,RALA,RALB,RAP1B,RAP2B,RRAS,RRAS2,SHC1,STAT1,STAT3,STAT5A
Melanocyte Development and Pigmentation Signaling	3.99	0.511	-1.313	ADCY1,ADCY3,ADCY6,ADCY7,ADCY9,ATF4,CREB1,CREB3,CREB5,CREBBP,EP300,GRB2,KIT,KRAS,MAP2K1,MAP2K2,MAPK1,MAPK3,MITF,MRAS,PAX3,PIK3C2A,PIK3C2G,PIK3C3,PIK3CA,PIK3CB,PIK3R1,PLCG2,PRKAG2,PRKAR1A,PRKAR2A,PRKAR2B,PTPN11,PTPN6,RAF1,RALA,RALB,RAP1B,RAP2B,RPS6KA1,RPS6KA4,RPS6KA6,RPS6KB1,RRAS,RRAS2,SHC1,SOS2,SRC
Remodeling of Epithelial Adherens Junctions	3.94	0.544	-4.123	ACTB,ACTG1,ACTN1,ACTN2,ACTN4,ACTR3,ARF6,ARPC1A,ARPC2,ARPC3,ARPC5,ARPC5L,CBLL1,CDH1,CLIP1,CTNNA1,CTNNB1,CTNND1,DNM1,HGS,IQGAP1,MAPRE1,MAPRE2,MAPRE3,MET,RAB5B,RAB7A,RALA,SRC,TUBA1A,TUBA1C,TUBA4A,TUBB2B,TUBB4A,TUBB4B,TUBB6,ZYX
IL-2 Signaling	3.94	0.557	-2.921	AKT1,AKT2,AKT3,CSNK2A1,CSNK2A2,GRB2,JUN,KRAS,LCK,MAP2K1,MAP2K2,MAPK1,MAPK3,MAPK8,MRAS,PIK3C2A,PIK3C2G,PIK3C3,PIK3CA,PIK3CB,PIK3R1,PTK2B,PTPN11,RAF1,RALA,RALB,RAP1B,RAP2B,RRAS,RRAS2,SHC1,SOS2,STAT5A,SYK
IL-17 Signaling	3.91	0.525	#NUM!	AKT1,AKT2,AKT3,CEBPB,CXCL1,CXCL11,CXCL8,GSK3B,IL17RC,IL6,JAK2,JUN,KRAS,MAP2K1,MAP2K2,MAP3K14,MAP3K7,MAPK1,MAPK12,MAPK13,MAPK14,MAPK3,MAPK8,MAPKAPK2,MRAS,NFKB1,NOS2,PIK3C2A,PIK3C2G,PIK3C3,PIK3CA,PIK3CB,PIK3R1,PTGS2,RALA,RALB,RAP1B,RAP2B,RRAS,RRAS2,TIMP1,TRAF3IP2
Chemokine Signaling	3.91	0.525	-0.617	CALM1 (includes others),CAMK1,CAMK2B,CAMK2G,CAMK4,CFL1,CXCL12,CXCR4,GNAI1,GNAI2,GNAI3,JUN,KRAS,LIMK1,LIMK2,MAP2K1,MAP2K2,MAPK1,MAPK12,MAPK13,MAPK14,MAPK3,MAPK8,MPRIP,MRAS,PIK3C2G,PLCB1,PLCB3,PLCG2,PPP1CB,PPP1R12A,PRKCA,PTK2B,RAF1,RALA,RALB,RAP1B,RAP2B,RHOA,RRAS,RRAS2,SRC
Leukocyte Extravasation Signaling	3.85	0.447	-2.753	ACTB,ACTG1,ACTN1,ACTN2,ACTN4,ARHGAP1,ARHGAP35,ARHGAP5,BCAR1,CD99,CDH5,CLDN1,CLDN11,CLDN12,CLDN15,CLDN16,CLDN23,CLDN4,CLDN7,CTNNA1,CTNNB1,CTNND1,CTTN,CXCL12,CXCR4,EDIL3,EZR,F11R,FER,GNAI1,GNAI2,GNAI3,ICAM1,ITGA1,ITGA2,ITGA3,ITGA4,ITGA5,ITGA6,ITGB1,JAM2,JAM3,MAP2K2,MAPK1,MAPK12,MAPK13,MAPK14,MAPK8,MMP11,MMP14,MMP16,MMP2,MSN,MYL6,NCF2,PIK3C2A,PIK3C2G,PIK3C3,PIK3CA,PIK3CB,PIK3R1,PLCG2,PRKCA,PRKCD,PRK…
CNTF Signaling	3.82	0.561	-2.121	AKT1,CNTFR,GRB2,IL6ST,JAK2,KRAS,LIFR,MAP2K1,MAP2K2,MAPK1,MAPK3,MRAS,PIK3C2A,PIK3C2G,PIK3C3,PIK3CA,PIK3CB,PIK3R1,PTPN11,RAF1,RALA,RALB,RAP1B,RAP2B,RPS6KA1,RPS6KA4,RPS6KA6,RPS6KB1,RRAS,RRAS2,STAT1,STAT3
Xenobiotic Metabolism General Signaling Pathway	3.8	0.469	-1.723	AHR,AKT1,AKT2,AKT3,ARNT,CREBBP,EP300,FTL,GSTA4,GSTM2,GSTO1,GSTO2,GSTP1,GSTT2/GSTT2B,GSTZ1,HMOX1,KEAP1,KRAS,MAF,MAP2K1,MAP2K2,MAP3K11,MAP3K14,MAP3K15,MAP3K2,MAP3K6,MAP3K7,MAP3K8,MAP3K9,MAPK1,MAPK12,MAPK13,MAPK14,MAPK3,MAPK8,MGST1,MRAS,NFE2L2,NQO1,NR1H2,NR1H3,PIK3C2A,PIK3C2G,PIK3C3,PIK3CA,PIK3CB,PIK3R1,PPARA,PRKCA,PRKCD,PRKCH,PRKCI,PRKD1,PRKD3,RAF1,RALA,RALB,RAP1B,RAP2B,RBX1,RRAS,RRAS2,RXRA,UGT1A1,…
Cell Cycle Regulation by BTG Family Proteins	3.79	0.622	0	CCND1,CCNE2,CDK2,CNOT7,E2F1,E2F2,E2F3,E2F5,E2F7,HOXB9,NOCT,PPM1L,PPP2CA,PPP2CB,PPP2R1B,PPP2R2A,PPP2R2B,PPP2R2C,PPP2R3A,PPP2R5D,PPP2R5E,PTPA,RB1
Toll-like Receptor Signaling	3.79	0.526	-3.053	CD14,ECSIT,EIF2AK2,IKBKB,IKBKG,IL12A,IL18,IL1A,IL1B,IL1RL1,IL36G,IL36RN,IRAK1,IRAK3,IRAK4,JUN,MAP3K14,MAP3K7,MAP4K4,MAPK1,MAPK12,MAPK13,MAPK14,MAPK8,MYD88,NFKB1,NFKB2,NFKBIA,PPARA,TAB1,TICAM1,TIRAP,TLR1,TLR2,TLR3,TLR6,TNFAIP3,TRAF4,UBB,UBC
Phagosome Maturation	3.77	0.464	#NUM!	ATP6V0A1,ATP6V0A2,ATP6V0E1,ATP6V0E2,ATP6V1C1,ATP6V1D,ATP6V1H,B2M,BET1L,CALR,CANX,CTSA,CTSB,CTSC,CTSD,CTSE,CTSF,CTSH,CTSS,CTSV,CTSZ,DCTN4,DYNC1I2,DYNC1LI1,DYNC1LI2,DYNC2H1,EEA1,GOSR1,GOSR2,HLA-A,HLA-B,HLA-C,HLA-E,LAMP1,LAMP2,M6PR,NAPA,NAPG,NCF2,NSF,PIK3C3,PRDX1,PRDX2,PRDX5,PRDX6,RAB5B,RAB7A,RAB7B,STX16,TAP1,TCIRG1,TCTE3,TSG101,TUBA1A,TUBA1C,TUBA4A,TUBB2B,TUBB4A,TUBB4B,TUBB6,TUBE1,TUBG2,VAMP2,VPS11…
TWEAK Signaling	3.75	0.629	-0.853	BAG4,BID,BIRC2,BIRC3,CASP3,CASP6,CASP7,CASP8,CYCS,IKBKB,IKBKE,IKBKG,MAP3K14,NFKB1,NFKB2,NFKBIA,NFKBID,NFKBIE,TNFRSF12A,TNFRSF25,TRADD,XIAP
IL-17A Signaling in Fibroblasts	3.75	0.629	#NUM!	CEBPB,CEBPD,GSK3B,IKBKB,IKBKE,IKBKG,IL17RC,IL6,JUN,MAP3K7,MAPK1,MAPK12,MAPK13,MAPK14,MAPK3,NFKB1,NFKB2,NFKBIA,NFKBID,NFKBIE,NFKBIZ,TRAF3IP2
Glioma Invasiveness Signaling	3.72	0.527	-1.029	ITGAV,ITGB5,KRAS,MAPK1,MAPK3,MMP2,MRAS,PIK3C2A,PIK3C2G,PIK3C3,PIK3CA,PIK3CB,PIK3R1,PLAU,PLAUR,RAC1,RAC2,RAC3,RALA,RALB,RAP1B,RAP2B,RHOA,RHOB,RHOBTB1,RHOBTB2,RHOC,RHOF,RHOQ,RHOT1,RHOT2,RHOU,RND2,RND3,RRAS,RRAS2,TIMP1,TIMP2,TIMP3
Glucocorticoid Receptor Signaling	3.7	0.414	#NUM!	ACTB,ADRB2,AKT1,AKT2,AKT3,ANXA1,BAG1,BCL2L1,CDK7,CEBPB,CHP1,CREB1,CREBBP,CSF2,CXCL2,CXCL8,DPF1,DUSP1,EP300,FKBP4,FKBP5,GRB2,GTF2A1,GTF2A2,GTF2H2,GTF2H5,HMGB1,HSP90B1,HSPA14,HSPA1A/HSPA1B,HSPA4,HSPA5,HSPA8,ICAM1,IKBKB,IKBKE,IKBKG,IL1B,IL6,JAK2,JUN,KRAS,KRT10,KRT18,KRT23,KRT34,KRT6B,KRT8,KRT80,KRT81,KRT86,MAP2K1,MAP2K2,MAP3K14,MAP3K7,MAPK1,MAPK12,MAPK13,MAPK14,MAPK3,MAPK8,MRAS,NCOA2,NCOA3,NCOR2,NFA…
ErbB4 Signaling	3.7	0.537	-1.567	ADAM17,AKT1,ERBB4,GRB2,KRAS,MAP2K1,MAP2K2,MAPK1,MAPK3,MRAS,NRG4,PIK3C2A,PIK3C2G,PIK3C3,PIK3CA,PIK3CB,PIK3R1,PLCG2,PRKCA,PRKCD,PRKCH,PRKCI,PRKD1,PRKD3,PSEN1,PSEN2,RAF1,RALA,RALB,RAP1B,RAP2B,RRAS,RRAS2,SHC1,SOS2,YAP1
HER-2 Signaling in Breast Cancer	3.67	0.512	#NUM!	AKT1,AKT2,AKT3,AREG,BAD,CCND1,CCNE2,CDK6,CDKN1B,EGFR,ERBB2,ERBB3,FOXO1,GRB2,GSK3B,ITGB1,ITGB5,ITGB8,KRAS,MMP2,MRAS,PARD6G,PIK3C2A,PIK3C2G,PIK3C3,PIK3CA,PIK3CB,PIK3R1,PRKCA,PRKCD,PRKCH,PRKCI,PRKD1,PRKD3,RALA,RALB,RAP1B,RAP2B,RRAS,RRAS2,SOS2,TP53,TSC2
ERK5 Signaling	3.66	0.528	-2.92	AKT1,ATF4,BAD,CREB1,CREB3,CREB5,CREBBP,EGFR,ELK4,FOSL1,GNA12,GNA13,IL6ST,KRAS,LIF,MAP3K2,MAP3K8,MEF2C,MEF2D,MRAS,PTPN11,RALA,RALB,RAP1B,RAP2B,RPS6KA1,RPS6KA4,RPS6KA6,RPS6KB1,RRAS,RRAS2,SGK1,SRC,YWHAB,YWHAE,YWHAG,YWHAQ,YWHAZ
Sonic Hedgehog Signaling	3.65	0.655	1.5	ARRB2,CCNB1,CDK1,GLI1,GLI2,GLIS1,GRK2,GSK3B,HHIP,PRKAG2,PRKAR1A,PRKAR2A,PRKAR2B,PTCH1,PTCH2,SMO,STK36,SUFU,ZNF875
Induction of Apoptosis by HIV1	3.51	0.541	0.707	BAK1,BBC3,BCL2L1,BID,BIRC2,BIRC3,CASP3,CASP8,CXCR4,CYCS,DAXX,DFFA,DFFB,ELP1,FAS,IKBKB,IKBKE,IKBKG,MAP3K14,MAPK12,MAPK8,NFKB1,NFKB2,NFKBIA,NFKBID,NFKBIE,NGFR,SLC25A4,SLC25A5,TNFRSF1A,TP53,TRADD,XIAP
Oncostatin M Signaling	3.42	0.581	-3.266	EPAS1,GRB2,IL6ST,JAK2,KRAS,MAP2K1,MAP2K2,MAPK1,MAPK3,MRAS,MT2A,OSMR,PLAU,RAF1,RALA,RALB,RAP1B,RAP2B,RRAS,RRAS2,SHC1,STAT1,STAT3,STAT5A,TIMP3
Neurotrophin/TRK Signaling	3.41	0.513	-2.667	AKT1,ATF4,BDNF,CREB1,CREB3,CREB5,CREBBP,FRS2,GRB2,JUN,KRAS,MAP2K1,MAP2K2,MAPK1,MAPK3,MAPK8,MRAS,NGFR,NTF4,NTRK2,PIK3C2A,PIK3C2G,PIK3C3,PIK3CA,PIK3CB,PIK3R1,PTPN11,RAF1,RALA,RALB,RAP1B,RAP2B,RPS6KA1,RRAS,RRAS2,SHC1,SORCS1,SOS2,SPRY2
Amyloid Processing	3.39	0.56	-1.5	AKT1,AKT2,AKT3,APP,BACE2,CAPN1,CAPN10,CAPN2,CAPN5,CAPNS1,CDK5,CSNK1A1,CSNK1E,CSNK2A1,CSNK2A2,GSK3B,MAPK1,MAPK12,MAPK13,MAPK14,MAPK3,MAPT,PRKAG2,PRKAR1A,PRKAR2A,PRKAR2B,PSEN1,PSEN2
Inhibition of ARE-Mediated mRNA Degradation Pathway	3.29	0.467	-1.457	AKT1,AKT2,AKT3,CNOT10,CNOT3,CNOT7,DCP1A,DDX6,DIS3,EDC3,EXOSC2,EXOSC4,EXOSC5,EXOSC8,MAP3K7,MAPK1,MAPK12,MAPK13,MAPK14,MAPK15,MAPK3,MAPK4,MAPK6,MAPKAPK2,NGFR,PARN,PPM1L,PPP2CA,PPP2CB,PPP2R1B,PPP2R2A,PPP2R2B,PPP2R2C,PPP2R3A,PPP2R5D,PPP2R5E,PRKAG2,PRKAR1A,PRKAR2A,PRKAR2B,PSME1,PSME2,PSMF1,PTPA,TNFRSF1A,TNFSF13,TNFSF15,XRN1,YWHAB,YWHAE,YWHAG,YWHAQ,YWHAZ,ZFP36,ZFP36L1,ZFP36L2,ZNF331
Lymphotoxin β Receptor Signaling	3.27	0.547	-1.279	AKT1,AKT2,AKT3,BCL2L1,BIRC2,CASP3,CREBBP,CXCL1,CYCS,ELP1,EP300,IKBKB,IKBKE,IKBKG,MAP3K14,MAPK1,MAPK3,NFKB1,NFKB2,NFKBIA,NFKBID,PIK3C2A,PIK3C2G,PIK3C3,PIK3CA,PIK3CB,PIK3R1,RELB,TRAF4
G Protein Signaling Mediated by Tubby	3.11	0.613	#NUM!	GNB1,GNB1L,GNB2,GNB3,GNB4,GNB5,GNG12,GNG2,GNG4,GNG5,GNG7,INSR,JAK2,LCK,MRAS,PLCB1,PLCB3,PLCG2,TUB
PKCθ Signaling in T Lymphocytes	3.11	0.445	-3.046	BCL10,CACNA1B,CACNA1C,CACNA1G,CACNA1H,CACNA2D1,CACNA2D2,CACNA2D3,CACNB2,CACNB3,CACNB4,CACNG4,CACNG8,CAMK2B,CAMK2G,CARD11,CHP1,FYN,GRB2,HLA-A,HLA-B,HLA-DOA,IKBKB,IKBKE,IKBKG,JUN,KRAS,LCK,MALT1,MAP3K11,MAP3K14,MAP3K15,MAP3K2,MAP3K6,MAP3K7,MAP3K8,MAP3K9,MAPK1,MAPK3,MAPK8,MRAS,NFATC1,NFATC3,NFATC4,NFKB1,NFKB2,NFKBIA,NFKBID,NFKBIE,PIK3C2A,PIK3C2G,PIK3C3,PIK3CA,PIK3CB,PIK3R1,PLCG2,PPP3CA,PPP3R1,RAC1,RA…
Mitochondrial Dysfunction	3.09	0.439	#NUM!	ACO2,AIFM1,APP,ATP5F1B,ATP5F1C,ATP5F1D,ATP5F1E,ATP5MC1,ATP5MC2,ATP5MC3,ATP5PB,ATP5PF,ATPAF1,ATPAF2,BACE2,CASP3,CASP8,CAT,COX11,COX15,COX17,COX5A,COX6B2,COX6C,COX7B,COX7C,CPT1A,CPT1C,CYB5R3,CYC1,CYCS,FURIN,GPD2,GPX7,GSR,HSD17B10,LRRK2,MAOA,MAPK12,MAPK8,NDUFA1,NDUFA2,NDUFA3,NDUFA4,NDUFA5,NDUFA6,NDUFA8,NDUFAB1,NDUFB10,NDUFB11,NDUFB4,NDUFB5,NDUFS2,NDUFS4,NDUFS7,NDUFS8,NDUFV1,NDUFV3,OGDH,PDHA1,PRDX3,P…
Estrogen-Dependent Breast Cancer Signaling	2.99	0.5	-2.121	AKT1,AKT2,AKT3,ATF4,CCND1,CREB1,CREB3,CREB5,CREBBP,EGFR,HSD17B1,HSD17B10,HSD17B11,HSD17B7,IGF1R,JUN,KRAS,MAPK1,MAPK3,MRAS,NFKB1,NFKB2,PIK3C2A,PIK3C2G,PIK3C3,PIK3CA,PIK3CB,PIK3R1,RALA,RALB,RAP1B,RAP2B,RRAS,RRAS2,SRC,STAT5A,TERT
Role of CHK Proteins in Cell Cycle Checkpoint Control	2.99	0.526	-1.225	ATMIN,ATR,CDC25A,CDK1,CDK2,CHEK1,CHEK2,E2F1,E2F2,E2F3,E2F5,E2F7,MDC1,NBN,PLK1,PPM1L,PPP2CA,PPP2CB,PPP2R1B,PPP2R2A,PPP2R2B,PPP2R2C,PPP2R3A,PPP2R5D,PPP2R5E,PTPA,RFC3,SLC19A1,TLK1,TP53
VEGF Family Ligand-Receptor Interactions	2.98	0.488	-0.801	AKT1,AKT2,AKT3,FLT1,FLT4,GRB2,KRAS,MAP2K1,MAP2K2,MAPK1,MAPK3,MRAS,NRP1,NRP2,PIK3C2A,PIK3C2G,PIK3C3,PIK3CA,PIK3CB,PIK3R1,PLA2G4A,PLA2G6,PLCG2,PRKCA,PRKCD,PRKCH,PRKCI,PRKD1,PRKD3,RAF1,RALA,RALB,RAP1B,RAP2B,RRAS,RRAS2,SHC1,SOS2,VEGFA,VEGFB,VEGFC
Dendritic Cell Maturation	2.98	0.432	-3.022	AKT1,AKT2,AKT3,ATF4,B2M,CD58,COL11A2,COL18A1,COL1A1,COL2A1,COL3A1,CREB1,CREB3,CREB5,CREBBP,CSF2,DDR2,HLA-A,HLA-B,HLA-C,HLA-DOA,HLA-E,ICAM1,IKBKB,IKBKE,IKBKG,IL12A,IL15,IL18,IL1A,IL1B,IL1RL2,IL23A,IL32,IL36G,IL36RN,IL6,IRF8,JAK2,LEPR,LY75,MAP3K14,MAPK1,MAPK12,MAPK13,MAPK14,MAPK3,MAPK8,MYD88,NFKB1,NFKB2,NFKBIA,NFKBID,NFKBIE,NGFR,PDIA3,PIK3C2A,PIK3C2G,PIK3C3,PIK3CA,PIK3CB,PIK3R1,PLCB1,PLCB3,PLCD3,PL…
GPCR-Mediated Nutrient Sensing in Enteroendocrine Cells	2.98	0.464	1.664	ADCY1,ADCY3,ADCY6,ADCY7,ADCY9,CACNA1B,CACNA1C,CACNA1G,CACNA1H,CACNA2D1,CACNA2D2,CACNA2D3,CACNB2,CACNB3,CACNB4,CACNG4,CACNG8,CCK,GNA11,GNA15,GNAI1,GNAI2,GNAI3,GNG12,GNG2,GNG4,GNG5,GNG7,ITPR1,ITPR3,LPAR5,PDIA3,PLCB1,PLCB3,PLCD3,PLCE1,PLCG2,PLCH1,PLCH2,PLCL1,PLCL2,PRKAG2,PRKAR1A,PRKAR2A,PRKAR2B,PRKCA,PRKCD,PRKCH,PRKCI,PRKD1,PRKD3,RAPGEF4
Melatonin Signaling	2.93	0.5	0.343	CALM1 (includes others),CAMK2B,CAMK2G,CAMK4,GNAI1,GNAI2,GNAI3,GNAO1,MAP2K1,MAP2K2,MAPK1,MAPK3,PDIA3,PLCB1,PLCB3,PLCD3,PLCE1,PLCG2,PLCH1,PLCH2,PLCL1,PLCL2,PRKAG2,PRKAR1A,PRKAR2A,PRKAR2B,PRKCA,PRKCD,PRKCH,PRKCI,PRKD1,PRKD3,RAF1,RORA,RORB,SLC2A4
HOTAIR Regulatory Pathway	2.89	0.438	-0.12	AKT1,AKT2,AKT3,CDH1,COL1A1,CREBBP,CTNNB1,DNMT3B,DZIP3,ELAVL1,EP300,ERBB2,FOXA1,FOXM1,H3-3A/H3-3B,HDAC1,HOTAIR,HOXD10,ICAM1,IRF1,JAM2,JARID2,KDM1A,KMT2C,LEF1,MET,MEX3B,MMP11,MMP14,MMP16,MMP2,MRTFA,MTF2,NFKB1,NFKB2,NFKBIA,PCDH10,PIK3C2A,PIK3C2G,PIK3C3,PIK3CA,PIK3CB,PIK3R1,PTEN,RBBP4,RBBP7,RBM38,REST,RHOC,SETDB1,SNAI2,SPP1,STAT3,STK38,SUZ12,TCF4,TCF7,TCF7L1,TGFB1,TWIST1,VIM,WNT10B,WNT11,WNT3,WNT3A,W…
CD40 Signaling	2.87	0.508	-0.539	ELP1,ICAM1,IKBKB,IKBKE,IKBKG,JUN,MAP2K1,MAP2K2,MAP3K14,MAP3K7,MAPK1,MAPK12,MAPK13,MAPK14,MAPK3,MAPK8,MAPKAPK2,NFKB1,NFKB2,NFKBIA,NFKBID,NFKBIE,PIK3C2A,PIK3C2G,PIK3C3,PIK3CA,PIK3CB,PIK3R1,PTGS1,PTGS2,STAT3,TANK,TNFAIP3
4-1BB Signaling in T Lymphocytes	2.87	0.594	-1.5	ELP1,IKBKB,IKBKE,IKBKG,JUN,MAP2K1,MAP2K2,MAP3K14,MAPK1,MAPK12,MAPK13,MAPK14,MAPK3,MAPK8,NFKB1,NFKB2,NFKBIA,NFKBID,NFKBIE
HIF1α Signaling	2.87	0.46	#NUM!	AKT1,AKT2,AKT3,ARNT,CREBBP,EDN1,EGLN1,EGLN3,ELOB,ELOC,EP300,HIF1A,JUN,KRAS,LDHC,MAPK1,MAPK12,MAPK13,MAPK14,MAPK15,MAPK3,MAPK4,MAPK6,MAPK8,MMP11,MMP14,MMP16,MMP2,MRAS,NOS2,P4HTM,PDGFC,PIK3C2A,PIK3C2G,PIK3C3,PIK3CA,PIK3CB,PIK3R1,RALA,RALB,RAP1B,RAP2B,RBX1,RRAS,RRAS2,SLC2A1,SLC2A4,TP53,VEGFA,VEGFB,VEGFC,VHL
Acute Phase Response Signaling	2.87	0.43	-3.825	AKT1,AKT2,AKT3,C1R,C1S,C3,CEBPB,CRABP2,ECSIT,F8,FGB,FN1,FTL,GRB2,HMOX1,IKBKB,IKBKE,IKBKG,IL18,IL1A,IL1B,IL1R1,IL1RAP,IL36G,IL36RN,IL6,IL6ST,IRAK1,JAK2,JUN,KRAS,MAP2K1,MAP2K2,MAP3K14,MAP3K7,MAPK1,MAPK12,MAPK13,MAPK14,MAPK3,MAPK8,MRAS,MYD88,NFKB1,NFKB2,NFKBIA,NFKBID,NFKBIE,NGFR,NOLC1,NR3C1,OSMR,PIK3CA,PIK3CB,PIK3R1,PTPN11,RAF1,RALA,RALB,RAP1B,RAP2B,RBP7,RRAS,RRAS2,SAA1,SERPINA1,SHC1,SOCS2,SOCS3,SOC…
IL-4 Signaling	2.86	0.482	#NUM!	AKT1,AKT2,AKT3,GRB2,HLA-A,HLA-B,HLA-DOA,HMGA1,IL13RA1,IL4R,INPP5B,INPP5D,INPP5F,INPP5J,IRS1,JAK2,KRAS,MRAS,NFATC1,NFATC3,NFATC4,NR3C1,NR3C2,PIK3C2A,PIK3C2G,PIK3C3,PIK3CA,PIK3CB,PIK3R1,PTPN6,RALA,RALB,RAP1B,RAP2B,RPS6KB1,RRAS,RRAS2,SHC1,SOS2,STAT6,SYNJ2
Role of BRCA1 in DNA Damage Response	2.85	0.487	-0.6	ACTB,ATR,ATRIP,BLM,BRCA2,BRIP1,CHEK1,CHEK2,DPF1,E2F1,E2F2,E2F3,E2F5,E2F7,FANCD2,FANCF,GADD45A,MDC1,MLH1,MSH2,MSH6,NBN,PBRM1,PHF10,PLK1,RB1,RBBP8,RBL1,RFC3,SLC19A1,SMARCA2,SMARCA4,SMARCB1,SMARCC1,SMARCD2,SMARCD3,STAT1,TP53,UIMC1
G-Protein Coupled Receptor Signaling	2.84	0.408	#NUM!	ADCY1,ADCY3,ADCY6,ADCY7,ADCY9,ADRA2C,ADRB2,AGTR1,AKT1,AKT2,AKT3,ATF4,CAMK2B,CAMK2G,CAMK4,CHRM3,CREB1,CREB3,CREB5,CREBBP,DUSP1,DUSP4,DUSP6,DUSP9,FYN,GABBR1,GABBR2,GDE1,GDPD1,GNA11,GNA15,GNAI1,GNAI2,GNAI3,GNAO1,GPER1,GRB2,GRK2,GRK4,HCAR3,HRH1,HTR1D,HTR2C,HTR6,HTR7,IKBKB,IKBKE,IKBKG,KRAS,LPAR1,MAP2K1,MAP2K2,MAP3K8,MAPK1,MAPK3,MPPE1,MPPED2,MRAS,NFKB1,NFKB2,NFKBIA,NFKBID,NFKBIE,NPY1R,OPRD1,PDE10A,PDE1…
Cancer Drug Resistance By Drug Efflux	2.83	0.517	#NUM!	ABCB1,ABCC1,AKT1,AKT2,AKT3,FOXG1,FOXO1,FOXO4,FOXO6,KRAS,MAP2K1,MAP2K2,MAPK1,MAPK3,MRAS,NFKB1,PDK1,PIK3CA,PIK3CB,PIK3R1,PTEN,PTGS2,RAF1,RALA,RALB,RAP1B,RAP2B,RRAS,RRAS2,TP53
Notch Signaling	2.77	0.568	0	ADAM17,CNTN1,DLL4,DTX2,DTX3,DTX4,FURIN,HEY1,HEY2,JAG1,JAG2,LFNG,MAML2,MAML3,MFNG,NOTCH1,NOTCH2,NUMB,PSEN1,PSEN2,RFNG
Neuropathic Pain Signaling In Dorsal Horn Neurons	2.77	0.465	1.313	BDNF,CAMK1,CAMK2B,CAMK2G,CAMK4,CREB1,GRIN2C,GRIN2D,GRINA,ITPR1,ITPR3,KCNH2,KCNN1,KCNN2,KCNN4,KCNQ2,MAPK1,MAPK3,NTRK2,PDIA3,PIK3C2A,PIK3C2G,PIK3C3,PIK3CA,PIK3CB,PIK3R1,PLCB1,PLCB3,PLCD3,PLCE1,PLCG2,PLCH1,PLCH2,PLCL1,PLCL2,PRKAG2,PRKAR1A,PRKAR2A,PRKAR2B,PRKCA,PRKCD,PRKCH,PRKCI,PRKD1,PRKD3,SRC,TAC1
Unfolded protein response	2.76	0.518	-0.408	ATF4,CALR,CANX,CD82,CEBPB,CEBPD,DNAJB9,DNAJC3,ERO1B,HSP90B1,HSPA14,HSPA1A/HSPA1B,HSPA4,HSPA5,HSPA8,HSPH1,INSIG1,MAPK8,MBTPS1,NFE2L2,P4HB,PDIA2,PPARG,SCAP,SEL1L,SREBF2,UBXN4,VCP,XBP1
Role of IL-17F in Allergic Inflammatory Airway Diseases	2.71	0.548	-1.964	ATF4,CREB1,CREB3,CREB5,CREBBP,CSF2,CXCL1,CXCL8,IL11,IL17RC,IL1B,IL6,MAP2K1,MAP2K2,MAPK1,MAPK3,NFKB1,NFKB2,RAF1,RPS6KA1,RPS6KA4,RPS6KA6,TRAF3IP2
CCR5 Signaling in Macrophages	2.69	0.468	-0.447	CACNA1B,CACNA1C,CACNA1G,CACNA1H,CACNA2D1,CACNA2D2,CACNA2D3,CACNB2,CACNB3,CACNB4,CACNG4,CACNG8,CALM1 (includes others),CAMK4,FAS,GNAI1,GNAI2,GNAI3,GNB1,GNB1L,GNB2,GNB3,GNB4,GNB5,GNG12,GNG2,GNG4,GNG5,GNG7,JUN,MAPK1,MAPK12,MAPK13,MAPK14,MAPK8,MRAS,PLCG2,PRKCA,PRKCD,PRKCH,PRKCI,PRKD1,PRKD3,PTK2B
TR/RXR Activation	2.67	0.476	#NUM!	AKR1C3,AKT1,AKT2,AKT3,ATP2A1,BCL3,CAMK4,EP300,HIF1A,KLF9,LDLR,ME1,NCOA2,NCOA3,NCOA4,NCOR2,NRGN,NXPH2,PDE3B,PFKP,PIK3C2A,PIK3C2G,PIK3C3,PIK3CA,PIK3CB,PIK3R1,PPARGC1A,RAB3B,RCAN2,RXRA,RXRG,SCARB1,SLC16A2,SLC2A1,SREBF2,STRBP,SYT12,TBL1XR1,THRA,UCP2
FGF Signaling	2.67	0.476	-0.949	AKT1,AKT2,AKT3,ATF4,CREB1,CREB3,CREB5,CREBBP,FGF13,FGF2,FGF5,FGF9,FGFR1,FGFR3,FGFR4,FRS2,GRB2,ITPR1,MAP2K1,MAPK1,MAPK12,MAPK13,MAPK14,MAPK3,MAPK8,MAPKAPK2,MET,PIK3C2A,PIK3C2G,PIK3C3,PIK3CA,PIK3CB,PIK3R1,PRKCA,PTPN11,PTPN6,RAC1,RAF1,SOS2,STAT3
IL-10 Signaling	2.66	0.493	#NUM!	ARG2,CD14,HMOX1,IKBKB,IKBKE,IKBKG,IL18,IL1A,IL1B,IL1R1,IL1RAP,IL1RL1,IL1RL2,IL36G,IL36RN,IL4R,IL6,JUN,MAP3K14,MAP3K7,MAP4K4,MAPK1,MAPK12,MAPK13,MAPK14,MAPK8,NFKB1,NFKB2,NFKBIA,NFKBID,NFKBIE,SOCS3,STAT3,TAB1
Role of JAK1 and JAK3 in γc Cytokine Signaling	2.66	0.493	#NUM!	GRB2,IL15,IL15RA,IL4R,IL7,IL7R,IRS1,IRS2,JAK2,KRAS,MAPK1,MAPK3,MRAS,PIK3C2A,PIK3C2G,PIK3C3,PIK3CA,PIK3CB,PIK3R1,PTK2B,PTPN11,RALA,RALB,RAP1B,RAP2B,RRAS,RRAS2,SHC1,SOCS3,STAT1,STAT3,STAT5A,STAT6,SYK
UVB-Induced MAPK Signaling	2.63	0.519	-0.392	AKT1,BAD,EGFR,EIF4EBP1,H3-3A/H3-3B,JUN,MAP2K1,MAPK1,MAPK12,MAPK13,MAPK14,MAPK3,MAPK8,PIK3C2A,PIK3C2G,PIK3C3,PIK3CA,PIK3CB,PIK3R1,PRKCA,PRKCD,PRKCH,PRKCI,PRKD1,PRKD3,RPS6KB1,TP53
T Cell Receptor Signaling	2.62	0.457	#NUM!	BCL10,CALM1 (includes others),CAMK4,CARD11,CBL,CD8A,FYN,GRB2,IKBKB,IKBKE,IKBKG,JUN,KRAS,LCK,MALT1,MAP2K1,MAP2K2,MAPK1,MAPK3,MAPK8,MRAS,NFATC1,NFATC3,NFATC4,NFKB1,NFKB2,NFKBIA,PIK3C2A,PIK3C2G,PIK3C3,PIK3CA,PIK3CB,PIK3R1,PPP3CA,PPP3R1,RAC1,RAF1,RALA,RALB,RAP1B,RAP2B,RASA1,RRAS,RRAS2,SHB,SOS2,TXK,VAV2
Apelin Adipocyte Signaling Pathway	2.61	0.476	-0.801	ADCY1,ADCY3,ADCY6,ADCY7,ADCY9,APLN,CAT,GNA11,GNAI1,GNAI2,GNAI3,GPX3,GPX7,GSTM2,GSTP1,GSTT2/GSTT2B,GSTZ1,HIF1A,LIPE,MAPK1,MAPK12,MAPK13,MAPK14,MAPK15,MAPK3,MAPK4,MAPK6,MAPK8,MGST1,NCF2,PPARGC1A,PRDX6,PRKAA1,PRKAA2,PRKAG2,PRKAR1A,PRKAR2A,PRKAR2B,SOD1
Inflammasome pathway	2.6	0.65	-3.606	CASP1,CASP8,CTSB,IL18,IL1B,MYD88,NEK7,NFKB1,NFKB2,NLRP1,NLRP3,PANX1,PYCARD
Docosahexaenoic Acid (DHA) Signaling	2.58	0.553	#NUM!	AKT1,AKT2,AKT3,APP,BAD,BCL2A1,BCL2L1,BID,BIK,CASP3,CYCS,FOXO1,GSK3B,IL1B,PIK3C2A,PIK3C2G,PIK3C3,PIK3CA,PIK3CB,PIK3R1,PNPLA2
Iron homeostasis signaling pathway	2.58	0.438	#NUM!	ABCB10,ACO2,ARNT,ATP6V0A1,ATP6V0A2,ATP6V0E1,ATP6V0E2,ATP6V1C1,ATP6V1D,ATP6V1H,BMP1,BMP2,BMP3,BMP4,BMP6,BMP7,BMP8B,BMPR2,CIAO1,CIAO2A,CIAO3,CUL1,EGFR,EPAS1,ERFE,FBXL5,FLVCR1,FTH1,FTL,FXN,GDF15,HBQ1,HFE,HIF1A,HMOX1,HSCB,IL6,IREB2,ISCU,JAK2,LRP1,LYRM4,MAPK1,MAPK3,NUBP2,PDGFA,PDGFB,SKP1,SLC40A1,SLC46A1,SLC48A1,SMAD2,SMAD3,STAT3,STAT5A,STEAP3,TCIRG1,TFR2,TFRC,TWSG1
Myc Mediated Apoptosis Signaling	2.56	0.52	0.392	ADRB2,BBC3,BCL2L1,BID,CASP3,CASP8,CFLAR,CREBBP,CYCS,FAS,IKBKB,IKBKE,IKBKG,MAX,MCL1,NFKB1,NFKB2,NGFR,PMAIP1,PRKAG2,PRKAR1A,PRKAR2A,PRKAR2B,TNFRSF1A,TP53,TRADD
Role of IL-17A in Arthritis	2.54	0.509	#NUM!	CXCL1,CXCL2,CXCL3,CXCL8,IL17RC,MAP2K1,MAP2K2,MAPK1,MAPK12,MAPK13,MAPK14,MAPK3,MAPK8,MAPKAPK2,NFKB1,NFKB2,NFKBIA,NFKBID,NFKBIE,NOS2,PIK3C2A,PIK3C2G,PIK3C3,PIK3CA,PIK3CB,PIK3R1,PTGS2,RPS6KA1
FcγRIIB Signaling in B Lymphocytes	2.53	0.48	-2.041	AKT1,CACNA1B,CACNA1C,CACNA1G,CACNA1H,CACNA2D1,CACNA2D2,CACNA2D3,CACNB2,CACNB3,CACNB4,CACNG4,CACNG8,DOK1,GRB2,INPP5D,KRAS,LYN,MAPK12,MAPK8,MRAS,PIK3C2A,PIK3C2G,PIK3C3,PIK3CA,PIK3CB,PIK3R1,PLCG2,RALA,RALB,RAP1B,RAP2B,RRAS,RRAS2,SHC1,SYK
Interferon Signaling	2.52	0.556	-3.9	BAK1,IFI35,IFI6,IFIT1,IFIT3,IFITM1,IFITM2,IFITM3,IFNGR1,IRF1,IRF9,ISG15,JAK2,MX1,OAS1,PSMB8,PTPN2,STAT1,STAT2,TAP1
CD27 Signaling in Lymphocytes	2.48	0.509	-1.46	BCL2L1,BID,CASP3,CASP8,CYCS,ELP1,IKBKB,IKBKE,IKBKG,JUN,MAP2K1,MAP2K2,MAP3K11,MAP3K14,MAP3K15,MAP3K2,MAP3K6,MAP3K7,MAP3K8,MAP3K9,MAPK12,MAPK8,NFKB1,NFKB2,NFKBIA,NFKBID,NFKBIE
Mechanisms of Viral Exit from Host Cells	2.46	0.537	#NUM!	ACTB,ACTG1,CHMP2A,CHMP3,CHMP4B,CHMP4C,CHMP6,LMNB2,NEDD4,PDCD6IP,PRKCA,PRKCD,PRKCH,PRKCI,PRKD1,PRKD3,SH3GL2,SH3GL3,SH3GLB1,TSG101,VPS36,XPO1
Role of JAK family kinases in IL-6-type Cytokine Signaling	2.43	0.6	#NUM!	IL6,IL6ST,JAK2,MAPK1,MAPK12,MAPK13,MAPK14,MAPK3,MAPK8,OSMR,PTPN11,SOCS3,STAT1,STAT3,STAT5A
D-myo-inositol (1,4,5)-Trisphosphate Biosynthesis	2.43	0.6	0.775	CDIPT,PI4K2A,PI4K2B,PI4KA,PI4KB,PIP4K2A,PIP4K2B,PIP4K2C,PIP5K1B,PLCB1,PLCB3,PLCD3,PLCE1,PLCG2,PLCH1
Neuroinflammation Signaling Pathway	2.34	0.393	-3.352	ACVR1,ACVR2B,AKT1,AKT2,AKT3,APP,ATF4,B2M,BACE2,BDNF,BIRC2,BIRC3,BIRC5,BMPR2,CASP1,CASP3,CASP8,CFLAR,CHP1,CREB1,CREB3,CREB5,CREBBP,CSF1R,CTNNB1,CXCL12,CXCL8,FAS,GABBR1,GABBR2,GABRB3,GABRE,GABRQ,GAD1,GDNF,GRIN2C,GRIN2D,GRINA,GSK3B,HLA-A,HLA-B,HLA-C,HLA-DOA,HLA-E,HMGB1,HMOX1,ICAM1,IDE,IFNGR1,IKBKB,IKBKE,IKBKG,IL12A,IL18,IL1B,IL1R1,IL6,IRAK1,IRAK3,IRAK4,IRF3,IRF7,JAK2,JUN,MAPK1,MAPK12,MAPK13,MAPK14,M…
TNFR2 Signaling	2.33	0.567	-1	BIRC2,BIRC3,IKBKB,IKBKE,IKBKG,JUN,MAP3K14,MAPK8,NFKB1,NFKB2,NFKBIA,NFKBID,NFKBIE,TANK,TBK1,TNFAIP3,XIAP
HMGB1 Signaling	2.27	0.418	-2.734	AKT1,AKT2,AKT3,CLCF1,CSF2,CXCL8,EDA,HMGB1,ICAM1,IFNGR1,IL11,IL12A,IL15,IL18,IL1A,IL1B,IL1R1,IL36G,IL6,JUN,KAT2A,KAT6A,KRAS,LIF,MAP2K1,MAP2K2,MAPK1,MAPK12,MAPK13,MAPK14,MAPK3,MAPK8,MRAS,NFKB1,NFKB2,NGFR,PIK3C2A,PIK3C2G,PIK3C3,PIK3CA,PIK3CB,PIK3R1,RAC1,RAC2,RAC3,RALA,RALB,RAP1B,RAP2B,RBBP7,RHOA,RHOB,RHOBTB1,RHOBTB2,RHOC,RHOF,RHOQ,RHOT1,RHOT2,RHOU,RND2,RND3,RRAS,RRAS2,TGFB1,TGFB2,TNFRSF1A,TNFSF13,TN…
Fc Epsilon RI Signaling	2.23	0.436	-1.414	AKT1,AKT2,AKT3,CSF2,FYN,GRB2,INPP5B,INPP5D,INPP5F,INPP5J,KRAS,LYN,MAP2K1,MAP2K2,MAPK1,MAPK12,MAPK13,MAPK14,MAPK3,MAPK8,MRAS,PIK3C2A,PIK3C2G,PIK3C3,PIK3CA,PIK3CB,PIK3R1,PLA2G4A,PLA2G6,PLCG2,PRKCA,PRKCD,PRKCH,PRKCI,PRKD1,PRKD3,PTPN11,RAC1,RAC2,RAC3,RAF1,RALA,RALB,RAP1B,RAP2B,RRAS,RRAS2,SOS2,SYK,SYNJ2,VAV2
Estrogen-mediated S-phase Entry	2.21	0.577	0	CCNA1,CCND1,CCNE2,CDC25A,CDK1,CDK2,CDKN1B,E2F1,E2F2,E2F3,E2F5,E2F7,RB1,RBL1,TFDP1
CD28 Signaling in T Helper Cells	2.2	0.433	-2.654	ACTR3,AKT1,AKT2,AKT3,ARPC1A,ARPC2,ARPC3,ARPC5,ARPC5L,BCL10,CALM1 (includes others),CAMK4,CARD11,CHP1,FYN,GRB2,HLA-A,HLA-B,HLA-DOA,IKBKB,IKBKE,IKBKG,ITPR1,ITPR3,JUN,LCK,MALT1,MAP2K1,MAP2K2,MAPK12,MAPK8,NFATC1,NFATC3,NFATC4,NFKB1,NFKB2,NFKBIA,NFKBID,NFKBIE,PAK1,PIK3C2A,PIK3C2G,PIK3C3,PIK3CA,PIK3CB,PIK3R1,PPP3CA,PPP3R1,PTPN11,PTPN6,RAC1,SYK
IL-22 Signaling	2.15	0.583	-1.604	AKT1,AKT2,AKT3,IL22RA1,MAPK1,MAPK12,MAPK13,MAPK14,MAPK3,MAPK8,SOCS3,STAT1,STAT3,STAT5A
p38 MAPK Signaling	2.14	0.432	-1.982	ATF4,CDC25B,CREB1,CREB3,CREB5,CREBBP,DAXX,DUSP1,DUSP10,EEF2K,FAS,H3-3A/H3-3B,HMGN1,HSPB1,IL18,IL1A,IL1B,IL1R1,IL1RAP,IL1RL1,IL1RL2,IL36G,IL36RN,IRAK1,IRAK3,IRAK4,MAP3K7,MAP4K1,MAPK12,MAPK13,MAPK14,MAPKAPK2,MAPT,MAX,MEF2C,MEF2D,MKNK1,PLA2G4A,PLA2G6,RPS6KA1,RPS6KA4,RPS6KA6,RPS6KB1,STAT1,TAB1,TGFB1,TGFB2,TGFBR2,TNFRSF1A,TP53,TRADD
BAG2 Signaling Pathway	2.14	0.512	-0.426	ANXA2,CASP3,CHRNA7,CTSB,HSPA14,HSPA1A/HSPA1B,HSPA4,HSPA5,HSPA8,MAPK1,MAPK14,MAPK3,MAPKAPK2,MAPT,NFKB1,NFKB2,PSME1,PSME2,PSMF1,SIRT3,STUB1,TP53
Activation of IRF by Cytosolic Pattern Recognition Receptors	2.14	0.476	-1.461	CREBBP,DDX58,DHX58,ELP1,IFIH1,IFIT2,IKBKB,IKBKE,IKBKG,IL6,IRF3,IRF7,IRF9,ISG15,JUN,MAPK12,MAPK8,MAVS,NFKB1,NFKB2,NFKBIA,NFKBID,NFKBIE,PPIB,SIKE1,STAT1,STAT2,TANK,TBK1,ZBP1
eNOS Signaling	2.11	0.415	-0.397	ADCY1,ADCY3,ADCY6,ADCY7,ADCY9,AKT1,AKT2,AKT3,AQP3,BDKRB1,BDKRB2,CALM1 (includes others),CAMK4,CASP3,CASP8,CAV1,CCNA1,CHRM3,CHRNA5,CHRNA7,CHRNB1,CNGA1,FLT1,FLT4,GUCY1A1,GUCY1A2,GUCY1B1,HSP90B1,HSPA14,HSPA1A/HSPA1B,HSPA4,HSPA5,HSPA8,ITPR1,ITPR3,LPAR1,LPAR2,LPAR3,LPAR5,LPAR6,PDGFC,PIK3C2A,PIK3C2G,PIK3C3,PIK3CA,PIK3CB,PIK3R1,PLCG2,PRKAA1,PRKAA2,PRKAG2,PRKAR1A,PRKAR2A,PRKAR2B,PRKCA,PRKCD,PRKCH,PRKCI,P…
GABA Receptor Signaling	2.06	0.442	#NUM!	ADCY1,ADCY3,ADCY6,ADCY7,ADCY9,ALDH5A1,ALDH9A1,AP1G2,AP2A1,AP2A2,AP2B1,AP2M1,AP2S1,CACNA1B,CACNA1C,CACNA1G,CACNA1H,CACNA2D1,CACNA2D2,CACNA2D3,CACNB2,CACNB3,CACNB4,CACNG4,CACNG8,DNM1,GABBR1,GABBR2,GABRB3,GABRE,GABRQ,GAD1,KCNH2,KCNN1,KCNN2,KCNN4,KCNQ2,MRAS,NSF,SLC6A11,UBB,UBC
tRNA Charging	2	0.513	3.578	AARS1,AARS2,CARS1,CARS2,DARS2,EARS2,EPRS1,FARSA,GARS1,IARS1,IARS2,LARS1,LARS2,MARS2,NARS1,PARS2,TARS2,TARS3,WARS2,YARS1
Antioxidant Action of Vitamin C	2	0.431	1.265	CSF2,GLRX,GPLD1,GSTO1,GSTO2,HMOX1,IKBKB,IKBKE,IKBKG,JAK2,LCAT,MAPK1,MAPK12,MAPK13,MAPK14,MAPK3,MAPK8,NFKB1,NFKB2,NFKBIA,NFKBID,NFKBIE,NXN,PDIA3,PLA2G4A,PLA2G6,PLA2G7,PLA2R1,PLAAT3,PLAAT4,PLCB1,PLCB3,PLCD3,PLCE1,PLCG2,PLCH1,PLCH2,PLCL1,PLCL2,PLD2,PLD6,PNPLA3,PNPLA8,SELENOT,SLC2A1,SLC2A4,STAT5A
IL-23 Signaling Pathway	2	0.5	-2.132	AKT1,AKT2,AKT3,CSF2,HIF1A,IL12RB2,IL1B,IL23A,JAK2,NFKB1,NFKB2,NFKBIA,PIK3C2A,PIK3C2G,PIK3C3,PIK3CA,PIK3CB,PIK3R1,RORA,RUNX1,SOCS3,STAT3
Proline Biosynthesis I	1.97	1	2	ALDH18A1,PYCR1,PYCR2,PYCR3
Xenobiotic Metabolism PXR Signaling Pathway	1.94	0.401	-0.57	ABCB1,ABCC3,ALDH16A1,ALDH18A1,ALDH1A2,ALDH1A3,ALDH1L2,ALDH3B1,ALDH4A1,ALDH5A1,ALDH6A1,ALDH7A1,ALDH9A1,CAMK2B,CAMK2G,CAT,CDK2,CDK5,CES3,CES4A,CHST11,CHST15,CHST2,CHST3,CREBBP,DNAJC7,EP300,ESD,GSTA4,GSTM2,GSTO1,GSTO2,GSTP1,GSTT2/GSTT2B,GSTZ1,HS3ST1,HS3ST3A1,HS3ST3B1,HS6ST1,HS6ST3,HSP90B1,MAOA,MGST1,NCOR2,NDST1,NOS2,NRIP1,PPARGC1A,PPP1CA,PPP1CB,PPP1CC,PPP1R12A,PPP1R14A,PPP1R3D,PRKAG2,PRKAR1A,PRKAR2A…
Gαs Signaling	1.94	0.43	-0.16	ADCY1,ADCY3,ADCY6,ADCY7,ADCY9,ADD1,ADD2,ADRB2,ATF4,CHRM3,CNGA1,CREB1,CREB3,CREB5,CREBBP,GNB1,GNB1L,GNB2,GNB3,GNB4,GNB5,GNG12,GNG2,GNG4,GNG5,GNG7,GPER1,HCAR3,HTR6,HTR7,MAP2K1,MAP2K2,MAPK1,MAPK3,MRAS,PRKAG2,PRKAR1A,PRKAR2A,PRKAR2B,PTGER4,RAPGEF3,RAPGEF4,RYR1,RYR2,SRC,VIPR1
Granzyme B Signaling	1.92	0.625	-0.632	BID,CASP3,CASP8,CYCS,DFFA,DFFB,LMNB2,NUMA1,PARP1,PRKDC
Role of Wnt/GSK-3β Signaling in the Pathogenesis of Influenza	1.91	0.449	1.46	APC2,AXIN1,CSNK1A1,CSNK1E,CSNK1G1,CSNK1G2,CTNNB1,DVL2,DVL3,FZD10,FZD2,FZD3,FZD4,FZD5,FZD6,FZD7,FZD8,FZD9,GSK3B,LEF1,NCOA2,NCOA3,NCOA4,SMO,TCF4,TCF7,TCF7L1,WNT10B,WNT11,WNT3,WNT3A,WNT4,WNT5A,WNT7B,WNT9A
Amyotrophic Lateral Sclerosis Signaling	1.88	0.433	-1.151	AKT3,BCL2L1,BID,BIRC2,BIRC3,CACNA1C,CAPN1,CAPN10,CAPN2,CAPN5,CAPNS1,CASP1,CASP3,CASP7,CAT,CYCS,GDNF,GRID1,GRIN2C,GRIN2D,GRINA,NEFH,NEFL,NEFM,PAK1,PDGFC,PIK3C2A,PIK3C2G,PIK3C3,PIK3CA,PIK3CB,PIK3R1,PPP3CA,RAB5B,RAC1,RNF19A,SOD1,TP53,VEGFA,VEGFB,VEGFC,XIAP
Apelin Cardiac Fibroblast Signaling Pathway	1.88	0.565	0.277	AGTR1,AKT1,AKT2,AKT3,APLN,CCN2,IL6,PRKAA1,PRKAA2,PRKAG2,SPHK1,TGFB1,TGFB2
Hepatic Cholestasis	1.86	0.4	#NUM!	ABCB1,ABCB4,ABCC1,ABCC3,ADCY1,ADCY3,ADCY6,ADCY7,ADCY9,ATP8B1,CD14,CLCF1,CSF2,CXCL8,EDA,FABP6,FGFR4,HSD3B7,IKBKB,IKBKE,IKBKG,IL11,IL12A,IL15,IL18,IL1A,IL1B,IL1R1,IL1RAP,IL1RL1,IL1RL2,IL36G,IL36RN,IL6,INSR,IRAK1,IRAK3,IRAK4,JUN,LIF,MAP3K14,MAP3K7,MAP4K2,MAPK12,MAPK8,MYD88,NFKB1,NFKB2,NFKBIA,NFKBID,NFKBIE,NGFR,NR1H3,NR5A2,PPARA,PRKAG2,PRKAR1A,PRKAR2A,PRKAR2B,PRKCA,PRKCD,PRKCH,PRKCI,PRKD1,PRKD3,RXRA,…
Growth Hormone Signaling	1.83	0.451	0	GHR,IGF1R,IGFBP3,IRS1,JAK2,MAPK1,MAPK3,PIK3C2A,PIK3C2G,PIK3C3,PIK3CA,PIK3CB,PIK3R1,PLCG2,PRKCA,PRKCD,PRKCH,PRKCI,PRKD1,PRKD3,PTPN6,RPS6KA1,RPS6KA4,RPS6KA6,RPS6KB1,SLC2A4,SOCS2,SOCS3,SOCS6,STAT1,STAT3,STAT5A
Endoplasmic Reticulum Stress Pathway	1.81	0.571	-1.508	ATF4,CALR,CASP3,CASP7,DNAJC3,EIF2S1,HSP90B1,HSPA5,MAPK8,MBTPS1,TAOK3,XBP1
Dolichyl-diphosphooligosaccharide Biosynthesis	1.8	0.7	1.134	ALG13,ALG5,ALG6,ALG8,DPAGT1,DPM1,DPM3
Phagosome Formation	1.8	0.416	#NUM!	CLEC7A,FN1,ITGA2,ITGA3,ITGA4,ITGA5,ITGB1,MARCKS,MRC2,PDIA3,PIK3C2A,PIK3C2G,PIK3C3,PIK3CA,PIK3CB,PIK3R1,PLCB1,PLCB3,PLCD3,PLCE1,PLCG2,PLCH1,PLCH2,PLCL1,PLCL2,PRKCA,PRKCD,PRKCH,PRKCI,PRKD1,PRKD3,RAC1,RAC2,RAC3,RHOA,RHOB,RHOBTB1,RHOBTB2,RHOC,RHOF,RHOQ,RHOT1,RHOT2,RHOU,RND2,RND3,SCARA3,SYK,TLR1,TLR2,TLR3,TLR6
Circadian Rhythm Signaling	1.8	0.515	#NUM!	ADCYAP1R1,ATF4,BHLHE40,BHLHE41,CLOCK,CREB1,CREB3,CREB5,CREBBP,CRY1,CSNK1E,GRIN2C,GRIN2D,GRINA,NR1D1,PER1,PER3
Superoxide Radicals Degradation	1.79	0.75	0	CAT,CYGB,GPX7,NQO1,SOD1,SOD2
T Cell Exhaustion Signaling Pathway	1.79	0.4	-2.774	ACVR1,ACVR2B,AKT1,AKT2,AKT3,BMPR2,CD274,EOMES,FOXO1,HLA-A,HLA-B,HLA-C,HLA-DOA,HLA-E,IL12A,IL12RB2,IL6,IRF9,JAK2,JUN,KRAS,LGALS9,MAPK1,MAPK12,MAPK3,MAPK8,MRAS,NFATC1,NFATC3,NFATC4,PDCD1LG2,PDK1,PIK3C2A,PIK3C2G,PIK3C3,PIK3CA,PIK3CB,PIK3R1,PLCG2,PPM1L,PPP2CA,PPP2CB,PPP2R1B,PPP2R2A,PPP2R2B,PPP2R2C,PPP2R3A,PPP2R5D,PPP2R5E,PRDM1,PTPA,PTPN11,PTPN6,RALA,RALB,RAP1B,RAP2B,RRAS,RRAS2,SMAD2,SMAD3,STAT1,STAT2…
Xenobiotic Metabolism CAR Signaling Pathway	1.79	0.397	-0.346	ABCB1,ABCC1,ABCC3,ALDH16A1,ALDH18A1,ALDH1A2,ALDH1A3,ALDH1L2,ALDH3B1,ALDH4A1,ALDH5A1,ALDH6A1,ALDH7A1,ALDH9A1,CHST11,CHST15,CHST2,CHST3,CREBBP,DNAJC7,EGFR,EP300,GSTA4,GSTM2,GSTO1,GSTO2,GSTP1,GSTT2/GSTT2B,GSTZ1,HS3ST1,HS3ST3A1,HS3ST3B1,HS6ST1,HS6ST3,HSP90B1,MAP2K1,MAP2K2,MAPK1,MAPK3,MGST1,NDST1,NOS2,NRIP1,PPARGC1A,PPM1L,PPP2CA,PPP2CB,PPP2R1B,PPP2R2A,PPP2R2B,PPP2R2C,PPP2R3A,PPP2R5D,PPP2R5E,PRKCA,PRKC…
Cellular Effects of Sildenafil (Viagra)	1.76	0.412	#NUM!	ACTB,ACTG1,ADCY1,ADCY3,ADCY6,ADCY7,ADCY9,CACNA1C,CACNG4,CACNG8,CALM1 (includes others),CAMK4,GUCY1A1,GUCY1A2,GUCY1B1,ITPR1,ITPR3,KCNH2,KCNN1,KCNN2,KCNN4,KCNQ2,MPRIP,MYH10,MYH3,MYH9,MYL12A,MYL12B,MYL6,MYL6B,MYL9,PDE1B,PDE2A,PDE3A,PDE3B,PDE4D,PDIA3,PLCB1,PLCB3,PLCD3,PLCE1,PLCG2,PLCH1,PLCH2,PLCL1,PLCL2,PPP1CB,PPP1R12A,PRKAG2,PRKAR1A,PRKAR2A,PRKAR2B,PRKG1,SLC4A11
PFKFB4 Signaling Pathway	1.73	0.478	-2.132	ATF4,CREB1,CREB3,CREB5,CREBBP,FGF2,GCK,HK1,HK2,MAP2K1,MAP2K2,MAPK1,MAPK3,NCOA3,PRKAG2,PRKAR1A,PRKAR2A,PRKAR2B,TGFB1,TGFB2,TP53,XDH
B Cell Activating Factor Signaling	1.72	0.488	-0.243	ELP1,IKBKB,IKBKE,IKBKG,JUN,MAP3K14,MAPK1,MAPK12,MAPK13,MAPK14,MAPK8,NFATC1,NFATC3,NFATC4,NFKB1,NFKB2,NFKBIA,NFKBID,NFKBIE,TNFRSF13C
Necroptosis Signaling Pathway	1.69	0.401	-2.646	AXL,BIRC2,BIRC3,CAMK2B,CAMK2G,CAPN1,CAPN10,CAPN2,CAPN5,CAPNS1,CASP1,CASP10,CASP8,CFLAR,CHP1,CYLD,DAPK1,EIF2AK2,FAS,FKBP1A,GLUD1,IKBKB,IKBKG,IRF3,IRF9,MAP3K7,MLKL,NGFR,NLRP3,PGAM5,PLA2G4A,PLA2G6,PPP3CA,PPP3R1,PYCARD,PYGL,RB1,RBCK1,RBL1,RIPK3,SLC25A4,SLC25A5,STAT1,STAT2,TAB1,TICAM1,TIMM17A,TIMM17B,TIMM44,TIMM50,TIMM8A,TLR3,TNFRSF10A,TNFRSF1A,TNIP1,TOMM20,TOMM22,TOMM34,TP53,TRADD,UBC,VDAC3,ZBP1
Tumoricidal Function of Hepatic Natural Killer Cells	1.68	0.542	-1.265	AIFM1,BID,CASP3,CASP6,CASP7,CASP8,CYCS,DFFA,DFFB,FAS,ICAM1,M6PR,SERPINB9
RAN Signaling	1.68	0.588	1.265	KPNA1,KPNA3,KPNA4,KPNA5,KPNA7,RANBP1,RANBP2,RANGAP1,RCC1,XPO1
Role of RIG1-like Receptors in Antiviral Innate Immunity	1.66	0.477	-3	CASP10,CASP8,CREBBP,DDX58,DHX58,EP300,IFIH1,IKBKB,IKBKE,IKBKG,IRF3,IRF7,MAVS,NFKB1,NFKB2,NFKBIA,NFKBID,NFKBIE,TANK,TBK1,TRIM25
Role of p14/p19ARF in Tumor Suppression	1.66	0.517	0.577	E2F1,NPM1,NPM2,NPM3,PIK3C2A,PIK3C2G,PIK3C3,PIK3CA,PIK3CB,PIK3R1,POLR3D,RAC1,RB1,SF3A1,TP53
April Mediated Signaling	1.65	0.487	-0.229	IKBKB,IKBKE,IKBKG,JUN,MAP3K14,MAPK1,MAPK12,MAPK13,MAPK14,MAPK8,NFATC1,NFATC3,NFATC4,NFKB1,NFKB2,NFKBIA,NFKBID,NFKBIE,TNFSF13
Role of JAK2 in Hormone-like Cytokine Signaling	1.65	0.5	#NUM!	GHR,IRS1,IRS2,JAK2,PTPN1,PTPN11,PTPN6,SH2B1,SH2B3,SHC1,SIRPA,SOCS2,SOCS3,SOCS6,STAT1,STAT3,STAT5A
Telomere Extension by Telomerase	1.62	0.6	#NUM!	HNRNPA1,HNRNPA2B1,NBN,POT1,TERF2,TINF2,TNKS,TNKS2,XRCC6
Polyamine Regulation in Colon Cancer	1.61	0.545	#NUM!	AZIN1,CTNNB1,KRAS,MAX,MXD1,PPARG,PSME1,PSME2,PSMF1,SAT1,SAT2,TCF4
Gαi Signaling	1.61	0.408	-0.603	ADCY1,ADCY3,ADCY6,ADCY7,ADCY9,ADRA2C,AGTR1,CAV1,GABBR1,GABBR2,GNAI1,GNAI2,GNAI3,GNB1,GNB1L,GNB2,GNB3,GNB4,GNB5,GNG12,GNG2,GNG4,GNG5,GNG7,GRB2,HTR1D,KRAS,LPAR1,MAPK1,MAPK3,MRAS,NPY1R,OPRD1,PRKAG2,PRKAR1A,PRKAR2A,PRKAR2B,RAF1,RALA,RALB,RAP1B,RAP2B,RGS12,RGS4,RGS7,RRAS,RRAS2,SHC1,SOS2,SRC,STAT3
Cholesterol Biosynthesis I	1.56	0.615	2.121	DHCR7,FDFT1,HSD17B7,LBR,LSS,MSMO1,SQLE,TM7SF2
Cholesterol Biosynthesis II (via 24,25-dihydrolanosterol)	1.56	0.615	2.121	DHCR7,FDFT1,HSD17B7,LBR,LSS,MSMO1,SQLE,TM7SF2
Cholesterol Biosynthesis III (via Desmosterol)	1.56	0.615	2.121	DHCR7,FDFT1,HSD17B7,LBR,LSS,MSMO1,SQLE,TM7SF2
UDP-N-acetyl-D-galactosamine Biosynthesis II	1.56	0.615	-2.646	GALE,GCK,GNPDA2,GNPNAT1,HK1,HK2,HKDC1,UAP1
CDP-diacylglycerol Biosynthesis I	1.55	0.55	-0.632	ABHD5,AGPAT4,CDS1,CDS2,GPAM,GPAT4,LPCAT4,MBOAT2,MBOAT7,PNPLA3,TAMM41
IL-17A Signaling in Gastric Cells	1.51	0.52	-1.508	CXCL1,CXCL11,CXCL8,EGFR,IL17RC,JUN,MAPK1,MAPK12,MAPK13,MAPK14,MAPK3,MAPK8,NFKB1
5-aminoimidazole Ribonucleotide Biosynthesis I	1.48	1	#NUM!	GART,PFAS,PPAT
Thiosulfate Disproportionation III (Rhodanese)	1.48	1	#NUM!	MOCS3,MPST,TST
Calcium Signaling	1.48	0.383	2.517	ASPH,ATF4,ATP2A1,ATP2A2,ATP2A3,ATP2B1,ATP2C1,CABIN1,CACNA1B,CACNA1C,CACNA1G,CACNA1H,CACNA2D1,CACNA2D2,CACNA2D3,CACNB2,CACNB3,CACNB4,CACNG4,CACNG8,CALM1 (includes others),CALR,CAMK1,CAMK2B,CAMK2G,CAMK4,CAMKK2,CHP1,CHRNA5,CHRNA7,CHRNB1,CREB1,CREB3,CREB5,CREBBP,EP300,GRIN2C,GRIN2D,GRINA,HDAC1,HDAC5,HDAC7,HDAC8,HDAC9,ITPR1,ITPR3,MAPK1,MAPK3,MCU,MEF2C,MEF2D,MYH10,MYH3,MYH9,MYL6,MYL6B,MYL9,NFATC1,NFATC…
TREM1 Signaling	1.46	0.427	-4.49	AKT1,AKT2,AKT3,CASP1,CSF2,CXCL2,CXCL8,GRB2,ICAM1,IL18,IL1B,IL1RL1,IL6,IRAK1,ITGA5,ITGB1,JAK2,LAT2,MAPK1,MAPK3,MYD88,NFKB1,NFKB2,NLRC5,NLRP3,PLCG2,STAT3,STAT5A,TLR1,TLR2,TLR3,TLR6
Ethanol Degradation IV	1.44	0.522	-0.577	ACSL1,ACSS1,ACSS3,ALDH1A2,ALDH1A3,ALDH3B1,ALDH4A1,ALDH7A1,ALDH9A1,CAT,CYGB,GPX7
IL-9 Signaling	1.44	0.485	-1.807	BCL3,IRS1,IRS2,NFKB1,NFKB2,PIK3C2A,PIK3C2G,PIK3C3,PIK3CA,PIK3CB,PIK3R1,SOCS2,SOCS3,STAT1,STAT3,STAT5A
Cdc42 Signaling	1.44	0.389	-4.082	ACTR3,APC2,ARHGEF6,ARPC1A,ARPC2,ARPC3,ARPC5,ARPC5L,B2M,BAIAP2,CDC42BPA,CDC42EP5,CDC42SE1,CFL1,CLIP1,DIAPH1,DIAPH3,EXOC7,EXOC8,FGD1,FNBP1L,GSK3B,HLA-A,HLA-B,HLA-C,HLA-DOA,HLA-E,IQGAP1,IQGAP2,IQGAP3,ITGA2,ITGA3,ITGA4,ITGA5,ITGB1,JUN,LIMK1,LIMK2,MAP3K11,MAPK1,MAPK12,MAPK13,MAPK14,MAPK8,MPRIP,MYL12A,MYL12B,MYL6,MYL6B,MYL9,PAK1,PAK2,PAK3,PAK4,PPP1CB,PPP1R12A,PRKCI,RAF1,RALA,RASA1,SRC,TNK2,VAV2,WASL,WI…
Phosphatidylcholine Biosynthesis I	1.41	0.714	1.342	CHKA,CHPT1,PCYT1A,PCYT1B,PHKA1
Parkinson's Signaling	1.4	0.562	#NUM!	CASP3,CYCS,MAPK1,MAPK12,MAPK13,MAPK14,MAPK8,SNCAIP,UCHL1
GPCR-Mediated Integration of Enteroendocrine Signaling Exemplified by an L Cell	1.4	0.425	0.18	ADCY1,ADCY3,ADCY6,ADCY7,ADCY9,ADRB2,CCK,GAL,GLP2R,GNA11,GNA15,GNAI1,GNAI2,GNAI3,ITPR1,ITPR3,PDIA3,PLCB1,PLCB3,PLCD3,PLCE1,PLCG2,PLCH1,PLCH2,PLCL1,PLCL2,PRKAG2,PRKAR1A,PRKAR2A,PRKAR2B,VIPR1
Oxidative Phosphorylation	1.38	0.404	4.523	ATP5F1B,ATP5F1C,ATP5F1D,ATP5F1E,ATP5MC1,ATP5MC2,ATP5MC3,ATP5PB,ATP5PF,ATPAF1,ATPAF2,COX11,COX15,COX17,COX5A,COX6B2,COX6C,COX7B,COX7C,CYC1,CYCS,NDUFA1,NDUFA2,NDUFA3,NDUFA4,NDUFA5,NDUFA6,NDUFA8,NDUFAB1,NDUFB10,NDUFB11,NDUFB4,NDUFB5,NDUFS2,NDUFS4,NDUFS7,NDUFS8,NDUFV1,NDUFV3,SDHC,UQCR10,UQCRC1,UQCRC2,UQCRH
Role of Pattern Recognition Receptors in Recognition of Bacteria and Viruses	1.37	0.39	-3.042	C3,CASP1,CLCF1,CLEC7A,CREB1,CSF2,CXCL8,DDX58,EDA,EIF2AK2,EIF2S1,IFIH1,IL11,IL12A,IL15,IL18,IL1A,IL1B,IL36G,IL6,IRF3,IRF7,LIF,MAPK1,MAPK12,MAPK3,MAPK8,MAVS,MYD88,NFKB1,NFKB2,NLRP3,OAS1,OAS2,OAS3,PIK3C2A,PIK3C2G,PIK3C3,PIK3CA,PIK3CB,PIK3R1,PLCG2,PRKCA,PRKCD,PRKCH,PRKCI,PRKD1,PRKD3,RIPK2,RNASEL,SYK,TGFB1,TGFB2,TICAM1,TLR1,TLR2,TLR3,TLR6,TNFSF13,TNFSF15
IL-12 Signaling and Production in Macrophages	1.34	0.394	#NUM!	AKT1,AKT2,AKT3,CEBPB,EP300,IFNGR1,IKBKB,IKBKE,IKBKG,IL12A,IL12RB2,IL18,IL23A,IRF1,IRF8,JUN,MAF,MAP2K1,MAP2K2,MAP3K8,MAPK1,MAPK12,MAPK13,MAPK14,MAPK3,MAPK8,MST1R,MYD88,NFKB1,NFKB2,NOS2,PIK3C2A,PIK3C2G,PIK3C3,PIK3CA,PIK3CB,PIK3R1,PPARG,PRKCA,PRKCD,PRKCH,PRKCI,PRKD1,PRKD3,RAB7A,RXRA,SERPINA1,STAT1,STAT6,TGFB1,TGFB2,TLR2
Antiproliferative Role of TOB in T Cell Signaling	1.33	0.462	-0.943	CCNA1,CCNE2,CDC34,CDK2,CDKN1B,CUL1,DPP7,MAPK1,PABPC1,RB1,RPS6KA1,SKP1,SMAD2,SMAD3,TGFB1,TGFB2,TGFBR2,TWSG1
GADD45 Signaling	1.29	0.526	#NUM!	ATR,CCNB1,CCND1,CCND3,CCNE2,CDK1,CDK2,GADD45A,GADD45B,TP53
DNA damage-induced 14-3-3σ Signaling	1.29	0.526	#NUM!	AKT1,AKT2,AKT3,ATR,CCNB1,CCNB2,CCNE2,CDK1,CDK2,TP53
Apelin Muscle Signaling Pathway	1.29	0.526	0	AKT1,AKT2,AKT3,APLN,MRAS,PPARGC1A,PRKAA1,PRKAA2,PRKAG2,SLC2A4
Triacylglycerol Biosynthesis	1.29	0.452	0	ABHD5,AGPAT4,DBT,DGAT1,DGAT2,ELOVL1,ELOVL2,GPAM,GPAT4,LPCAT4,LPIN3,MBOAT2,MBOAT7,PLPP2,PLPP3,PLPPR3,PLPPR4,PNPLA3,PORCN
Assembly of RNA Polymerase II Complex	1.29	0.44	#NUM!	CDK7,GTF2A1,GTF2A2,GTF2H2,GTF2H5,POLR2B,POLR2D,POLR2F,POLR2J2/POLR2J3,POLR2K,TAF1,TAF10,TAF11,TAF13,TAF15,TAF2,TAF3,TAF4B,TAF5,TAF5L,TAF6L,TAF7
SPINK1 General Cancer Pathway	1.28	0.42	-1.671	AKT1,AKT2,AKT3,EGFR,IL6,JAK2,KRAS,MAP2K1,MAP2K2,MAPK1,MAPK3,MRAS,MT1E,MT1F,MT2A,PIK3C2A,PIK3C2G,PIK3C3,PIK3CA,PIK3CB,PIK3R1,RAF1,RALA,RALB,RAP1B,RAP2B,RRAS,RRAS2,STAT3
Type I Diabetes Mellitus Signaling	1.25	0.396	-3.55	BID,CASP3,CASP8,CYCS,FAS,GAD1,HLA-A,HLA-B,HLA-C,HLA-DOA,HLA-E,HSPD1,IFNGR1,IKBKB,IKBKE,IKBKG,IL12A,IL1B,IL1R1,IL1RAP,IRAK1,IRF1,JAK2,MAP3K14,MAP3K7,MAPK1,MAPK12,MAPK13,MAPK14,MAPK8,MYD88,NFKB1,NFKB2,NFKBIA,NFKBID,NFKBIE,NGFR,NOS2,SOCS2,SOCS3,SOCS6,STAT1,TNFRSF1A,TRADD
Role of PI3K/AKT Signaling in the Pathogenesis of Influenza	1.24	0.422	-1.46	AKT1,AKT2,AKT3,GNAI1,GNAI2,GNAI3,GSK3B,IRF3,KPNA3,MAP2K1,MAP2K2,MAPK1,MAPK3,MLH1,NFKB1,NFKB2,NFKBIA,NFKBID,NFKBIE,PIK3C2A,PIK3C2G,PIK3C3,PIK3CA,PIK3CB,PIK3R1,PLAC8,ZNF346
Cell Cycle Control of Chromosomal Replication	1.23	0.429	1.633	CDC45,CDC6,CDC7,CDK1,CDK12,CDK17,CDK18,CDK2,CDK5,CDK6,CDK7,CDK8,CDT1,CHEK2,MCM3,MCM5,MCM6,MCM7,POLA1,POLD1,POLE,RPA2,TOP2A,TOP2B
PD-1, PD-L1 cancer immunotherapy pathway	1.21	0.396	1.333	AKT1,AKT2,AKT3,B2M,BCL2L1,CD274,CDK2,CDKN1B,CSNK2A1,CSNK2A2,FBXO38,GSK3B,HLA-A,HLA-B,HLA-C,HLA-DOA,HLA-E,IFNGR1,IL12A,JAK2,LATS1,LATS2,LCK,MR1,NGFR,PDCD1LG2,PDCD4,PIK3C2A,PIK3C2G,PIK3C3,PIK3CA,PIK3CB,PIK3R1,PTEN,PTPN11,SMAD3,STAT5A,TGFB1,TGFB2,TNFRSF1A,YAP1,ZBTB12
Phosphatidylglycerol Biosynthesis II (Non-plastidic)	1.21	0.5	-0.632	ABHD5,AGPAT4,CDS1,CDS2,GPAM,GPAT4,LPCAT4,MBOAT2,MBOAT7,PNPLA3,TAMM41
Embryonic Stem Cell Differentiation into Cardiac Lineages	1.19	0.6	#NUM!	GATA4,HOXB5,ISL1,NKX2-5,POU5F1,SOX2
Calcium Transport I	1.19	0.6	0	ATP2A1,ATP2A2,ATP2A3,ATP2B1,ATP2C1,ATP2C2
Choline Biosynthesis III	1.14	0.533	1.414	CHPT1,GPLD1,HMOX1,PCYT1A,PCYT1B,PHKA1,PLD2,PLD6
nNOS Signaling in Skeletal Muscle Cells	1.12	0.439	#NUM!	CACNA1B,CACNA1C,CACNA1G,CACNA1H,CACNA2D1,CACNA2D2,CACNA2D3,CACNB2,CACNB3,CACNB4,CACNG4,CACNG8,CALM1 (includes others),CAMK4,DMD,RYR1,RYR2,SNTB1
Pyrimidine Ribonucleotides Interconversion	1.12	0.439	0.471	AK5,AK7,AK9,BLM,CANT1,CMPK1,CMPK2,DHX9,ENTPD3,ENTPD6,ENTPD7,HNRNPA1,NME3,NME4,NUDT5,RECQL,RECQL4,SMARCA1
Sphingomyelin Metabolism	1.12	0.625	-2.236	SGMS1,SGMS2,SMPD1,SMPD2,SMPD5
Calcium-induced T Lymphocyte Apoptosis	1.09	0.409	-0.816	ATP2A1,ATP2A2,ATP2A3,CABIN1,CALM1 (includes others),CAMK4,CAPN2,CHP1,EP300,HDAC1,HLA-A,HLA-B,HLA-DOA,ITPR1,ITPR3,LCK,MEF2D,NR4A1,ORAI1,PPP3CA,PPP3R1,PRKCA,PRKCD,PRKCH,PRKCI,PRKD1,PRKD3
Role of MAPK Signaling in the Pathogenesis of Influenza	1.08	0.4	#NUM!	AKT1,AKT2,AKT3,CASP3,KRAS,LCAT,MAP2K1,MAP2K2,MAPK1,MAPK12,MAPK13,MAPK14,MAPK3,MAPK8,MRAS,PLA2G4A,PLA2G6,PLA2G7,PLA2R1,PLAAT3,PLAAT4,PNPLA3,PNPLA8,PRKCA,PTGS2,RAF1,RALA,RALB,RAP1B,RAP2B,RRAS,RRAS2
Bladder Cancer Signaling	1.07	0.392	-1.147	CCND1,CDH1,CXCL8,DAPK1,E2F1,EGFR,ERBB2,FGF13,FGF2,FGF5,FGF9,FGFR3,KRAS,MAP2K1,MAP2K2,MAPK1,MAPK3,MMP11,MMP14,MMP16,MMP2,MRAS,PA2G4,PDGFC,RAF1,RALA,RALB,RAP1B,RAP2B,RB1,RRAS,RRAS2,SIN3A,TFDP1,TP53,VEGFA,VEGFB,VEGFC
Superpathway of D-myo-inositol (1,4,5)-trisphosphate Metabolism	1.07	0.478	-0.905	BPNT1,INPP1,INPP5B,INPP5D,INPP5E,INPP5F,INPP5J,ITPKB,ITPKC,PTEN,SYNJ2
LPS/IL-1 Mediated Inhibition of RXR Function	1.07	0.366	-1.915	ABCA1,ABCB1,ABCC3,ABCC4,ACOX1,ACSL1,ACSL4,ACSL5,ALDH16A1,ALDH18A1,ALDH1A2,ALDH1A3,ALDH1L2,ALDH3B1,ALDH4A1,ALDH5A1,ALDH6A1,ALDH7A1,ALDH9A1,CAT,CD14,CHST11,CHST15,CHST2,CHST3,CPT1A,CPT1C,CPT2,ECSIT,FABP5,FABP6,GSTA4,GSTM2,GSTO1,GSTO2,GSTP1,GSTT2/GSTT2B,GSTZ1,HS3ST1,HS3ST3A1,HS3ST3B1,HS6ST1,HS6ST3,IL18,IL1A,IL1B,IL1R1,IL1RAP,IL1RL1,IL1RL2,IL36G,IL36RN,IRAK1,JUN,MAOA,MAP3K7,MAPK8,MGST1,MYD88,NDST1,NG…
1D-myo-inositol Hexakisphosphate Biosynthesis II (Mammalian)	1.06	0.5	-1	INPP5B,INPP5D,INPP5E,INPP5F,INPP5J,IPPK,ITPKB,ITPKC,SYNJ2
Purine Nucleotides Degradation II (Aerobic)	1.06	0.5	-0.333	ACP3,ADA,ADAT3,GDA,IMPDH2,NT5C2,NT5C3B,NT5E,XDH
D-myo-inositol (1,3,4)-trisphosphate Biosynthesis	1.06	0.5	-1	INPP5B,INPP5D,INPP5E,INPP5F,INPP5J,ITPKB,ITPKC,PTEN,SYNJ2
Inhibition of Matrix Metalloproteases	1.06	0.436	-0.277	ADAM10,ADAM12,ADAM17,HSPG2,LRP1,MMP11,MMP14,MMP16,MMP2,RECK,SDC1,SDC2,TFPI2,THBS2,TIMP1,TIMP2,TIMP3
Ceramide Biosynthesis	1.05	0.667	-1	KDSR,SPTLC1,SPTLC2,SPTLC3
Arginine Degradation VI (Arginase 2 Pathway)	1.05	0.667	1	ARG2,PYCR1,PYCR2,PYCR3
UDP-N-acetyl-D-glucosamine Biosynthesis II	1.05	0.667	-1	GFPT1,GFPT2,GNPNAT1,UAP1
Zymosterol Biosynthesis	1.05	0.667	1	HSD17B7,LBR,MSMO1,TM7SF2
Autophagy	1.05	0.41	#NUM!	ATG13,ATG4C,ATG5,ATG9B,CTSA,CTSB,CTSC,CTSD,CTSE,CTSF,CTSH,CTSS,CTSV,CTSZ,LAMP1,LAMP2,MAP1LC3A,PIK3C3,SQSTM1,VPS11,VPS16,VPS18,VPS33A,VPS39,WDFY3
Lipid Antigen Presentation by CD1	1.02	0.462	#NUM!	AP1G2,AP2A1,AP2A2,AP2B1,AP2M1,AP2S1,ARF6,B2M,CALR,CANX,PDIA3,PSAP
Apelin Liver Signaling Pathway	1.02	0.462	-0.577	APLN,COL11A2,COL18A1,COL1A1,COL2A1,COL3A1,EDN1,FAS,GSK3B,IRS1,MAPK12,MAPK8
Cytotoxic T Lymphocyte-mediated Apoptosis of Target Cells	1.02	0.441	-1.667	B2M,BID,CASP3,CASP6,CASP7,CASP8,CYCS,DFFA,DFFB,FAS,HLA-A,HLA-B,HLA-C,HLA-E,ZBTB12
Spermine and Spermidine Degradation I	1	0.75	#NUM!	SAT1,SAT2,SMOX
Ascorbate Recycling (Cytosolic)	1	0.75	#NUM!	GLRX,GSTO1,GSTO2
Glutathione Redox Reactions II	1	0.75	#NUM!	GLRX,GSR,PDIA3
Acetate Conversion to Acetyl-CoA	1	0.75	#NUM!	ACSL1,ACSS1,ACSS3
Putrescine Degradation III	0.996	0.476	-1.265	ALDH1A2,ALDH1A3,ALDH3B1,ALDH4A1,ALDH7A1,ALDH9A1,MAOA,SAT1,SAT2,SMOX
UDP-D-xylose and UDP-D-glucuronate Biosynthesis	0.987	1	#NUM!	UGDH,UXS1
Epoxysqualene Biosynthesis	0.987	1	#NUM!	FDFT1,SQLE
Choline Degradation I	0.987	1	#NUM!	ALDH7A1,CHDH
S-methyl-5-thio-α-D-ribose 1-phosphate Degradation	0.987	1	#NUM!	APIP,MRI1
Flavin Biosynthesis IV (Mammalian)	0.987	1	#NUM!	FLAD1,RFK
Glycine Degradation (Creatine Biosynthesis)	0.987	1	#NUM!	GAMT,GATM
Cysteine Biosynthesis/Homocysteine Degradation	0.987	1	#NUM!	CBS/CBSL,CTH
Purine Nucleotides De Novo Biosynthesis II	0.983	0.545	2.449	ADSL,GART,IMPDH2,PAICS,PFAS,PPAT
GDP-glucose Biosynthesis	0.983	0.545	-1.342	GCK,HK1,HK2,HKDC1,PGM1,PGM2
Breast Cancer Regulation by Stathmin1	0.963	0.345	#NUM!	ADCYAP1R1,ADGRA2,ADGRA3,ADGRB1,ADGRB3,ADGRE2,ADGRE5,ADGRF4,ADGRG1,ADGRG2,ADGRG6,ADGRL1,ADGRL3,ADGRL4,ADGRV1,ADRA2C,ADRB2,AGTR1,ARHGEF1,ARHGEF12,ARHGEF16,ARHGEF17,ARHGEF19,ARHGEF4,ARHGEF6,ARHGEF7,ATF4,AURKA,BDKRB1,BDKRB2,BMP6,CAMK1,CAMK2B,CAMK2G,CAMK4,CCND1,CCND3,CDK1,CDK2,CDK6,CDKN1B,CELSR1,CHRM3,CREB1,CREB3,CREB5,CREBBP,E2F1,E2F2,E2F3,E2F5,E2F7,F2RL1,FGF2,FOXM1,FZD10,FZD2,FZD3,FZD4,FZD5,FZD6,FZD…
Vitamin-C Transport	0.951	0.458	-2.121	GLRX,GSTO1,GSTO2,LRRC8A,LRRC8D,LRRC8E,NXN,SELENOT,SLC2A1,SLC2A4,STOM
Pyrimidine Ribonucleotides De Novo Biosynthesis	0.939	0.419	0.471	AK5,AK7,AK9,BLM,CANT1,CMPK1,CMPK2,DHX9,ENTPD3,ENTPD6,ENTPD7,HNRNPA1,NME3,NME4,NUDT5,RECQL,RECQL4,SMARCA1
iCOS-iCOSL Signaling in T Helper Cells	0.932	0.378	-1.521	AKT1,AKT2,AKT3,BAD,CALM1 (includes others),CAMK2B,CAMK2G,CAMK4,CHP1,GRB2,HLA-A,HLA-B,HLA-DOA,ICOSLG/LOC102723996,IKBKB,IKBKE,IKBKG,INPP5D,ITPR1,ITPR3,LCK,NFATC1,NFATC3,NFATC4,NFKB1,NFKB2,NFKBIA,NFKBID,NFKBIE,PIK3C2A,PIK3C2G,PIK3C3,PIK3CA,PIK3CB,PIK3R1,PLEKHA1,PLEKHA2,PPP3CA,PPP3R1,PTEN,RAC1,SHC1
Oxidative Ethanol Degradation III	0.921	0.474	-0.333	ACSL1,ACSS1,ACSS3,ALDH1A2,ALDH1A3,ALDH3B1,ALDH4A1,ALDH7A1,ALDH9A1
Nucleotide Excision Repair Pathway	0.921	0.429	#NUM!	CDK7,ERCC1,ERCC4,ERCC5,ERCC6,GTF2H2,GTF2H5,POLR2B,POLR2D,POLR2F,POLR2J2/POLR2J3,POLR2K,RAD23B,RPA2,XPC
Dopamine Receptor Signaling	0.914	0.39	0	ADCY1,ADCY3,ADCY6,ADCY7,ADCY9,MAOA,NCS1,PPM1L,PPP1CA,PPP1CB,PPP1CC,PPP1R12A,PPP1R14A,PPP1R3D,PPP2CA,PPP2CB,PPP2R1B,PPP2R2A,PPP2R2B,PPP2R2C,PPP2R3A,PPP2R5D,PPP2R5E,PRKAG2,PRKAR1A,PRKAR2A,PRKAR2B,PTPA,PTS,SMOX
NER Pathway	0.9	0.379	1.768	CDK7,CHAF1A,CHAF1B,COPS2,COPS3,COPS4,CUL4A,DDB1,DDB2,EP300,ERCC1,ERCC4,ERCC5,ERCC6,GTF2H2,GTF2H5,H3-3A/H3-3B,HMGN1,LIG4,POLA1,POLD1,POLE,POLE4,POLR2B,POLR2D,POLR2F,POLR2J2/POLR2J3,POLR2K,RAD23B,RBX1,RFC3,RNF111,RPA2,SLC19A1,TOP2A,TOP2B,UBE2I,USP7,XPC
DNA Double-Strand Break Repair by Non-Homologous End Joining	0.896	0.5	#NUM!	LIG4,NBN,PARP1,PRKDC,WRN,XRCC4,XRCC6
Pyrimidine Deoxyribonucleotides De Novo Biosynthesis I	0.876	0.455	0	AK5,AK7,AK9,CMPK1,CMPK2,DTYMK,NME3,NME4,RRM1,RRM2
Apelin Pancreas Signaling Pathway	0.86	0.409	-0.471	APLN,MAPK12,MAPK8,NFKB1,NFKB2,PDE3B,PIK3C2A,PIK3C2G,PIK3C3,PIK3CA,PIK3CB,PIK3R1,PRKAA1,PRKAA2,PRKAG2,PRKAR1A,PRKAR2A,PRKAR2B
nNOS Signaling in Neurons	0.845	0.404	0	CALM1 (includes others),CAMK4,CAPN1,CAPN10,CAPN2,CAPN5,CAPNS1,CHP1,GRIN2C,GRIN2D,GRINA,PPP3CA,PPP3R1,PRKCA,PRKCD,PRKCH,PRKCI,PRKD1,PRKD3
Stearate Biosynthesis I (Animals)	0.845	0.404	0.243	ACOT1,ACOT11,ACOT2,ACOT9,ACSL1,ACSL4,ACSL5,DBT,ELOVL1,ELOVL2,GNPAT,LPCAT4,MBOAT7,PORCN,SLC27A4,SLC27A6,SRD5A3,TECR,THEM4
Dermatan Sulfate Degradation (Metazoa)	0.839	0.471	-1.414	CEMIP,CEMIP2,GM2A,HEXB,HEXD,HYAL3,IDS,IDUA
Mitochondrial L-carnitine Shuttle Pathway	0.839	0.471	-0.707	ACSL1,ACSL4,ACSL5,CPT1A,CPT1C,CPT2,SLC27A4,SLC27A6
D-myo-inositol (1,4,5)-trisphosphate Degradation	0.839	0.471	0	BPNT1,INPP1,INPP5B,INPP5D,INPP5E,INPP5F,INPP5J,SYNJ2
Antigen Presentation Pathway	0.815	0.41	#NUM!	B2M,CALR,CANX,HLA-A,HLA-B,HLA-C,HLA-DOA,HLA-E,MR1,NLRC5,PDIA3,PSMB8,PSMB9,TAP1,TAP2,TAPBP
Glucose and Glucose-1-phosphate Degradation	0.812	0.5	-1.342	GCK,HK1,HK2,HKDC1,PGM1,PGM2
Guanosine Nucleotides Degradation III	0.812	0.5	-0.816	ACP3,GDA,NT5C2,NT5C3B,NT5E,XDH
Trehalose Degradation II (Trehalase)	0.81	0.571	#NUM!	GCK,HK1,HK2,HKDC1
Acetyl-CoA Biosynthesis I (Pyruvate Dehydrogenase Complex)	0.81	0.571	2	DBT,DLD,PDHA1,PDHB
Glycogen Biosynthesis II (from UDP-D-Glucose)	0.81	0.571	-1	GBE1,GYG1,GYG2,UGP2
MIF Regulation of Innate Immunity	0.799	0.405	-0.728	CD14,JUN,MAPK1,MAPK12,MAPK3,MAPK8,MIF,NFKB1,NFKB2,NFKBIA,NFKBID,NFKBIE,NOS2,PLA2G4A,PLA2G6,PTGS2,TP53
Adenosine Nucleotides Degradation II	0.759	0.467	-1.134	ACP3,ADA,ADAT3,NT5C2,NT5C3B,NT5E,XDH
Transcriptional Regulatory Network in Embryonic Stem Cells	0.752	0.389	#NUM!	CDX2,CDYL,EOMES,ESX1,FOXC1,FOXD3,GATA4,GATA6,H3-3A/H3-3B,HAND1,ISL1,KAT6A,PAX6,POU5F1,REST,SKIL,SOX2,STAT3,TCF7L1,TRIM24,ZIC3
cAMP-mediated signaling	0.738	0.351	0.577	ADCY1,ADCY3,ADCY6,ADCY7,ADCY9,ADRA2C,ADRB2,AGTR1,AKAP1,AKAP9,ATF4,CALM1 (includes others),CAMK1,CAMK2B,CAMK2G,CAMK4,CHRM3,CNGA1,CREB1,CREB3,CREB5,CREBBP,DUSP1,DUSP4,DUSP6,DUSP9,GABBR1,GABBR2,GDE1,GDPD1,GNAI1,GNAI2,GNAI3,GNAO1,GPER1,GRK2,GRK4,HCAR3,HTR1D,HTR6,HTR7,LPAR1,MAP2K1,MAP2K2,MAPK1,MAPK3,MPPE1,MPPED2,NPY1R,OPRD1,PALM2AKAP2,PDE10A,PDE11A,PDE12,PDE1B,PDE2A,PDE3A,PDE3B,PDE4D,PDE8A,PKIG,PLD6,P…
Phospholipases	0.728	0.381	0.408	GPLD1,HMOX1,LCAT,LIPG,PDIA3,PLA2G4A,PLA2G6,PLA2G7,PLA2R1,PLAAT3,PLAAT4,PLCB1,PLCB3,PLCD3,PLCE1,PLCG2,PLCH1,PLCH2,PLCL1,PLCL2,PLD2,PLD6,PNPLA3,PNPLA8
tRNA Splicing	0.726	0.395	1	GDE1,GDPD1,MPPE1,MPPED2,PDE10A,PDE11A,PDE12,PDE1B,PDE2A,PDE3A,PDE3B,PDE4D,PDE8A,PLD6,SMPDL3A,SMPDL3B,TSEN2
Gustation Pathway	0.724	0.357	#NUM!	ADCY1,ADCY3,ADCY6,ADCY7,ADCY9,ASIC1,ASIC3,CACNA1B,CACNA1C,CACNA1G,CACNA1H,CACNA2D1,CACNA2D2,CACNA2D3,CACNB2,CACNB3,CACNB4,CACNG4,CACNG8,GDE1,GDPD1,GNB1,GNB3,GNG2,GNG5,GNG7,ITPR1,ITPR3,LPAR6,MPPE1,MPPED2,P2RX5,P2RX6,P2RY1,P2RY11,P2RY2,P2RY6,PANX1,PDE10A,PDE11A,PDE12,PDE1B,PDE2A,PDE3A,PDE3B,PDE4D,PDE8A,PLD6,PRKAG2,PRKAR1A,PRKAR2A,PRKAR2B,SCNN1A,SMPDL3A,SMPDL3B
Superpathway of Cholesterol Biosynthesis	0.721	0.414	2.309	DHCR7,FDFT1,FDPS,GGPS1,HSD17B7,IDI1,LBR,LSS,MSMO1,MVK,SQLE,TM7SF2
FAT10 Signaling Pathway	0.721	0.444	-2.449	HTT,PSMD4,PSME1,PSME2,PSMF1,SQSTM1,UBA6,UBE2Z
Creatine-phosphate Biosynthesis	0.717	0.6	#NUM!	CKB,CKMT1A/CKMT1B,MAP4K4
2-ketoglutarate Dehydrogenase Complex	0.717	0.6	#NUM!	DHTKD1,DLD,OGDH
Serine Biosynthesis	0.717	0.6	#NUM!	PHGDH,PSAT1,UBAC2
CMP-N-acetylneuraminate Biosynthesis I (Eukaryotes)	0.717	0.6	#NUM!	GNE,NAGK,NANS
Dermatan Sulfate Biosynthesis (Late Stages)	0.717	0.391	-0.943	CHST11,CHST14,CHST15,CHST2,CHST3,DSE,DSEL,HS3ST1,HS3ST3A1,HS3ST3B1,HS6ST1,HS6ST3,NDST1,SULT1A2,SULT1C4,SULT2B1,SULT4A1,UST
Trans, trans-farnesyl Diphosphate Biosynthesis	0.717	0.6	#NUM!	FDPS,GGPS1,IDI1
Galactose Degradation I (Leloir Pathway)	0.717	0.6	#NUM!	GALE,GALK1,GALM
Glutamate Degradation III (via 4-aminobutyrate)	0.717	0.6	#NUM!	ALDH5A1,GAD1,SUCLG2
Assembly of RNA Polymerase III Complex	0.676	0.462	#NUM!	GTF3A,GTF3C1,GTF3C2,GTF3C4,POLR3D,SF3A1
Acyl-CoA Hydrolysis	0.676	0.462	1.342	ACOT1,ACOT11,ACOT2,ACOT9,GNPAT,THEM4
Urate Biosynthesis/Inosine 5'-phosphate Degradation	0.676	0.462	-0.816	ACP3,IMPDH2,NT5C2,NT5C3B,NT5E,XDH
Role of JAK1, JAK2 and TYK2 in Interferon Signaling	0.672	0.417	0	IFNGR1,JAK2,NFKB1,NFKB2,PTPN2,PTPN6,RAF1,STAT1,STAT2,STAT3
Mismatch Repair in Eukaryotes	0.642	0.438	#NUM!	EXO1,MLH1,MSH2,MSH6,POLD1,RFC3,SLC19A1
Inositol Pyrophosphates Biosynthesis	0.631	0.5	0	IP6K1,IP6K2,IPPK,PPIP5K1
Salvage Pathways of Pyrimidine Deoxyribonucleotides	0.631	0.5	-2	APOBEC3B,CDA,TK1,TYMP
Dermatan Sulfate Biosynthesis	0.629	0.373	-0.853	B3GAT2,CHPF2,CHST11,CHST14,CHST15,CHST2,CHST3,CHSY3,CSGALNACT2,DSE,DSEL,HS3ST1,HS3ST3A1,HS3ST3B1,HS6ST1,HS6ST3,NDST1,SULT1A2,SULT1C4,SULT2B1,SULT4A1,UST
L-carnitine Biosynthesis	0.614	0.667	#NUM!	ALDH9A1,BBOX1
Diphthamide Biosynthesis	0.614	0.667	#NUM!	DPH5,EEF2
NADH Repair	0.614	0.667	#NUM!	GAPDH,NAXD
Methylglyoxal Degradation I	0.614	0.667	#NUM!	GLO1,HAGHL
Glutathione Biosynthesis	0.614	0.667	#NUM!	GCLM,GSS
Inosine-5'-phosphate Biosynthesis II	0.614	0.667	#NUM!	ADSL,PAICS
4-aminobutyrate Degradation I	0.614	0.667	#NUM!	ALDH5A1,SUCLG2
Retinol Biosynthesis	0.604	0.381	-0.5	AKR1C3,CEL,CES3,CES4A,DDHD2,DHRS3,ESD,LIPE,LIPG,LPL,LRAT,PNPLA2,PNPLA3,RBP7,RDH10,RDH13
MIF-mediated Glucocorticoid Regulation	0.561	0.382	-0.832	CD14,MAPK1,MAPK3,MIF,NFKB1,NFKB2,NFKBIA,NFKBID,NFKBIE,NR3C1,PLA2G4A,PLA2G6,PTGS2
Glycogen Degradation III	0.561	0.429	-0.816	MGAM,PGM1,PGM2,PYGB,PYGL,TYMP
Colanic Acid Building Blocks Biosynthesis	0.561	0.429	0	GALE,GALK1,GMDS,MPI,UGDH,UGP2
Histamine Degradation	0.542	0.412	-1.134	ALDH1A2,ALDH1A3,ALDH3B1,ALDH4A1,ALDH7A1,ALDH9A1,HNMT
Cardiomyocyte Differentiation via BMP Receptors	0.53	0.4	1.342	BMP2,BMP4,BMP7,BMPR2,GATA4,MAP3K7,MEF2C,NKX2-5
Proline Biosynthesis II (from Arginine)	0.53	0.5	#NUM!	PYCR1,PYCR2,PYCR3
Urea Cycle	0.53	0.5	#NUM!	ARG2,ASL,CPS1
Chondroitin and Dermatan Biosynthesis	0.53	0.5	#NUM!	CHPF2,CHSY3,CSGALNACT2
Glycerol Degradation I	0.53	0.5	#NUM!	GK,GK5,GPD2
Glycine Cleavage Complex	0.53	0.5	#NUM!	DLD,GLDC,OCA2
Adenine and Adenosine Salvage III	0.53	0.5	#NUM!	ADA,ADAT3,HPRT1
Ceramide Degradation	0.53	0.5	#NUM!	ACER2,ACER3,ASAH1
Fatty Acid α-oxidation	0.53	0.4	-1.414	ALDH1A2,ALDH1A3,ALDH3B1,ALDH4A1,ALDH7A1,ALDH9A1,ALOXE3,PTGS2
Methylthiopropionate Biosynthesis	0.493	1	#NUM!	ADI1
Thio-molybdenum Cofactor Biosynthesis	0.493	1	#NUM!	MOCOS
Acetyl-CoA Biosynthesis III (from Citrate)	0.493	1	#NUM!	ACLY
L-cysteine Degradation II	0.493	1	#NUM!	CTH
Adenine and Adenosine Salvage VI	0.493	1	#NUM!	ADK
Phosphatidylethanolamine Biosynthesis III	0.493	1	#NUM!	PTDSS2
Lanosterol Biosynthesis	0.493	1	#NUM!	LSS
D-mannose Degradation	0.493	1	#NUM!	MPI
UDP-N-acetyl-D-galactosamine Biosynthesis I	0.493	1	#NUM!	GALE
Triacylglycerol Degradation	0.489	0.362	0.728	AARS1,ABHD12,ABHD2,ABHD6,CEL,CES3,DDHD2,LIPE,LIPG,LPL,MGLL,NDST1,PNPLA2,PNPLA3,PNPLA7,PRDX6,TARS2
Glycogen Degradation II	0.478	0.417	-0.447	PGM1,PGM2,PYGB,PYGL,TYMP
Glutathione Redox Reactions I	0.45	0.375	-0.333	GPX3,GPX7,GSR,GSTM2,GSTP1,GSTT2/GSTT2B,GSTZ1,MGST1,PRDX6
TCA Cycle II (Eukaryotic)	0.45	0.375	1.667	ACO2,DHTKD1,DLD,IDH3G,MDH2,OGDH,OGDHL,SDHC,SUCLA2
Retinoic acid Mediated Apoptosis Signaling	0.444	0.35	-1.886	BID,CASP3,CASP8,CFLAR,CRABP2,CYCS,IRF1,PARP1,PARP10,PARP12,PARP4,PARP8,PARP9,RARB,RARG,RXRA,RXRG,TIPARP,TNFRSF10A,TNKS,TNKS2
Glutamate Receptor Signaling	0.442	0.351	1.342	CALM1 (includes others),CAMK4,GNB1,GNB3,GNG2,GNG5,GNG7,GRID1,GRIN2C,GRIN2D,GRINA,HOMER1,HOMER2,HOMER3,PICK1,SLC17A7,SLC1A1,SLC1A3,SLC1A4,SLC38A1
Chondroitin Sulfate Biosynthesis (Late Stages)	0.441	0.354	-0.243	CHST11,CHST15,CHST2,CHST3,CHSY3,CSGALNACT2,HS3ST1,HS3ST3A1,HS3ST3B1,HS6ST1,HS6ST3,NDST1,SULT1A2,SULT1C4,SULT2B1,SULT4A1,UST
Pentose Phosphate Pathway (Oxidative Branch)	0.415	0.5	#NUM!	G6PD,PGD
Branched-chain α-keto acid Dehydrogenase Complex	0.415	0.5	#NUM!	DBT,DLD
Heme Biosynthesis from Uroporphyrinogen-III I	0.415	0.5	#NUM!	PPOX,UROD
Melatonin Degradation II	0.415	0.5	#NUM!	MAOA,SMOX
Arginine Degradation I (Arginase Pathway)	0.415	0.5	#NUM!	ALDH4A1,ARG2
N-acetylglucosamine Degradation II	0.415	0.5	#NUM!	GNPDA2,NAGK
Fatty Acid β-oxidation III (Unsaturated, Odd Number)	0.415	0.5	#NUM!	ECI1,ECI2
Superpathway of Serine and Glycine Biosynthesis I	0.397	0.429	#NUM!	PHGDH,PSAT1,UBAC2
Purine Ribonucleosides Degradation to Ribose-1-phosphate	0.397	0.429	#NUM!	ADA,ADAT3,PGM2
Prostanoid Biosynthesis	0.39	0.4	#NUM!	CYP2S1,PTGES,PTGS1,PTGS2
Pentose Phosphate Pathway	0.39	0.4	1	G6PD,PGD,RPIA,TALDO1
Fatty Acid Activation	0.387	0.385	-0.447	ACSL1,ACSL4,ACSL5,SLC27A4,SLC27A6
NAD Phosphorylation and Dephosphorylation	0.387	0.385	0.447	ACP3,ACP5,NADK2,NNT,PXYLP1
Chondroitin Sulfate Degradation (Metazoa)	0.386	0.375	-0.816	CEMIP,CEMIP2,GM2A,HEXB,HEXD,HYAL3
Nur77 Signaling in T Lymphocytes	0.366	0.339	#NUM!	CABIN1,CALM1 (includes others),CAMK4,CASP3,CHP1,CYCS,EP300,HDAC1,HDAC9,HLA-A,HLA-B,HLA-DOA,MAP3K2,MEF2D,NFATC1,NR4A1,PPP3CA,PPP3R1,RXRA,SIN3A
Chondroitin Sulfate Biosynthesis	0.363	0.339	-0.229	B3GAT2,CHPF2,CHST11,CHST15,CHST2,CHST3,CHSY3,CSGALNACT2,HS3ST1,HS3ST3A1,HS3ST3B1,HS6ST1,HS6ST3,NDST1,SULT1A2,SULT1C4,SULT2B1,SULT4A1,UST
DNA Methylation and Transcriptional Repression Signaling	0.344	0.343	#NUM!	ARID4B,CHD3,CHD4,DNMT3B,H3-3A/H3-3B,HDAC1,MBD2,RBBP4,RBBP7,SAP130,SAP18,SIN3A
γ-linolenate Biosynthesis II (Animals)	0.321	0.353	0	ACSL1,ACSL4,ACSL5,CYB5R3,SLC27A4,SLC27A6
γ-glutamyl Cycle	0.308	0.364	-1	GCLM,GGT7,GSS,OPLAH
Airway Pathology in Chronic Obstructive Pulmonary Disease	0.3	0.375	#NUM!	CXCL2,CXCL8,MMP2
Sphingosine and Sphingosine-1-phosphate Metabolism	0.3	0.375	#NUM!	ACER2,ACER3,ASAH1
Dopamine Degradation	0.292	0.333	-1.265	ALDH1A2,ALDH1A3,ALDH3B1,ALDH4A1,ALDH7A1,ALDH9A1,MAOA,SMOX,SULT1A2,SULT1C4
Tetrahydrofolate Salvage from 5,10-methenyltetrahydrofolate	0.289	0.4	#NUM!	GART,MTHFD1L
Lysine Degradation II	0.289	0.4	#NUM!	AASS,ALDH7A1
Myo-inositol Biosynthesis	0.289	0.4	#NUM!	INPP5F,ISYNA1
Citrulline-Nitric Oxide Cycle	0.289	0.4	#NUM!	ASL,NOS2
Folate Polyglutamylation	0.289	0.4	#NUM!	FPGS,MTHFD1L
Heparan Sulfate Biosynthesis (Late Stages)	0.281	0.324	0.209	AARS1,CES3,CHST11,CHST15,CHST2,CHST3,EXT1,EXT2,HS3ST1,HS3ST3A1,HS3ST3B1,HS6ST1,HS6ST3,LIPE,NDST1,PNPLA7,PRDX6,SULT1A2,SULT1C4,SULT2B1,SULT4A1,TARS2,UST
Cysteine Biosynthesis III (mammalia)	0.28	0.333	0.707	AHCYL1,CBS/CBSL,CTH,EEF1AKMT2,MAT2B,PRMT3,PRMT5,SUV39H2
Spliceosomal Cycle	0.268	0.5	#NUM!	U2AF1/U2AF1L5
Asparagine Degradation I	0.268	0.5	#NUM!	ASRGL1
β-alanine Degradation I	0.268	0.5	#NUM!	ALDH6A1
Guanine and Guanosine Salvage I	0.268	0.5	#NUM!	HPRT1
Spermine Biosynthesis	0.268	0.5	#NUM!	SMS
Alanine Degradation III	0.268	0.5	#NUM!	GPT2
Alanine Biosynthesis II	0.268	0.5	#NUM!	GPT2
Palmitate Biosynthesis I (Animals)	0.268	0.5	#NUM!	OXSM
L-cysteine Degradation III	0.268	0.5	#NUM!	MPST
4-hydroxyproline Degradation I	0.268	0.5	#NUM!	ALDH4A1
Fatty Acid Biosynthesis Initiation II	0.268	0.5	#NUM!	OXSM
Threonine Degradation II	0.268	0.5	#NUM!	GCAT
Adenine and Adenosine Salvage I	0.268	0.5	#NUM!	APRT
GDP-L-fucose Biosynthesis I (from GDP-D-mannose)	0.268	0.5	#NUM!	GMDS
Putrescine Biosynthesis III	0.268	0.5	#NUM!	AZIN2
Formaldehyde Oxidation II (Glutathione-dependent)	0.268	0.5	#NUM!	ESD
Glutamate Biosynthesis II	0.268	0.5	#NUM!	GLUD1
Glutamate Degradation X	0.268	0.5	#NUM!	GLUD1
Glutamate Dependent Acid Resistance	0.268	0.5	#NUM!	GAD1
Superpathway of Citrulline Metabolism	0.255	0.333	0.447	ALDH18A1,ARG2,ASL,CPS1,NOS2
Cleavage and Polyadenylation of Pre-mRNA	0.243	0.333	#NUM!	CPSF6,CSTF1,CSTF2,CSTF3
Assembly of RNA Polymerase I Complex	0.243	0.333	#NUM!	POLR1B,POLR1C,POLR1D,POLR2F
Hematopoiesis from Multipotent Stem Cells	0.243	0.333	#NUM!	CSF1,CSF2,IL15,IL7
BER pathway	0.243	0.333	#NUM!	PARP1,PNKP,POLB,POLE
Phosphatidylethanolamine Biosynthesis II	0.228	0.333	#NUM!	CHKA,ETNK1,PIGF
Leucine Degradation I	0.228	0.333	#NUM!	ACADM,HMGCLL1,MCCC1
Heme Biosynthesis II	0.228	0.333	#NUM!	PPOX,UROD,UROS
Arginine Biosynthesis IV	0.205	0.333	#NUM!	ASL,GLUD1
Pentose Phosphate Pathway (Non-oxidative Branch)	0.205	0.333	#NUM!	RPIA,TALDO1
Selenocysteine Biosynthesis II (Archaea and Eukaryotes)	0.205	0.333	#NUM!	PSTK,SEPHS2
Lactose Degradation III	0.205	0.333	#NUM!	GLB1L3,PSAP
Uracil Degradation II (Reductive)	0.163	0.333	#NUM!	DPYD
Coenzyme A Biosynthesis	0.163	0.333	#NUM!	PPCS
Proline Degradation	0.163	0.333	#NUM!	ALDH4A1
1,25-dihydroxyvitamin D3 Biosynthesis	0.163	0.333	#NUM!	CYP27B1
Tetrahydrobiopterin Biosynthesis I	0.163	0.333	#NUM!	PTS
D-glucuronate Degradation I	0.163	0.333	#NUM!	DCXR
Methionine Salvage II (Mammalian)	0.163	0.333	#NUM!	MTR
Thymine Degradation	0.163	0.333	#NUM!	DPYD
Geranylgeranyldiphosphate Biosynthesis	0.163	0.333	#NUM!	GGPS1
Anandamide Degradation	0.163	0.333	#NUM!	NAAA
Biotin-carboxyl Carrier Protein Assembly	0.163	0.333	#NUM!	ACACB
Thyroid Hormone Biosynthesis	0.163	0.333	#NUM!	CTSD
Glycerol-3-phosphate Shuttle	0.163	0.333	#NUM!	GPD2
1D-myo-inositol Hexakisphosphate Biosynthesis V (from Ins(1,3,4)P3)	0.163	0.333	#NUM!	IPPK
Oxidized GTP and dGTP Detoxification	0.163	0.333	#NUM!	DDX6
Tetrahydrobiopterin Biosynthesis II	0.163	0.333	#NUM!	PTS
S-adenosyl-L-methionine Biosynthesis	0.163	0.333	#NUM!	MAT2B
Tyrosine Biosynthesis IV	0.163	0.333	#NUM!	PCBD2
L-serine Degradation	0.163	0.333	#NUM!	SDSL
N-acetylglucosamine Degradation I	0.163	0.333	#NUM!	GNPDA2
Coagulation System	0	0.286	-0.632	BDKRB1,BDKRB2,F3,F8,FGB,PLAU,PLAUR,SERPINA1,TFPI,THBD
LXR/RXR Activation	0	0.306	2.121	ABCA1,ABCG4,ARG2,C3,CD14,FDFT1,IL18,IL1A,IL1B,IL1R1,IL1RAP,IL1RL1,IL1RL2,IL36G,IL36RN,IL6,IRF3,LCAT,LDLR,LPL,MLXIPL,NCOR2,NFKB1,NFKB2,NGFR,NOS2,NR1H2,NR1H3,PLTP,PON3,PTGS2,RXRA,RXRG,SAA1,SERPINA1,TLR3,TNFRSF1A
FXR/RXR Activation	0	0.254	#NUM!	ABCB4,AKT1,AKT2,AKT3,C3,CREBBP,FABP6,FGFR4,FOXA1,FOXO1,IL18,IL1A,IL1B,IL36G,IL36RN,LCAT,LPL,MAPK12,MAPK8,MLXIPL,NR1H3,NR5A2,PLTP,PON3,PPARA,PPARG,PPARGC1A,RXRA,SAA1,SCARB1,SDC1,SERPINA1
PXR/RXR Activation	0	0.308	#NUM!	ABCB1,ABCC3,AKT1,AKT2,AKT3,CES3,CPT1A,FOXO1,GSTM2,IL6,INSR,NR3C1,PPARA,PPARGC1A,PRKAG2,PRKAR1A,PRKAR2A,PRKAR2B,RXRA,UGT1A1
T Helper Cell Differentiation	0	0.26	#NUM!	CXCR5,HLA-A,HLA-B,HLA-DOA,ICOSLG/LOC102723996,IFNGR1,IL12A,IL12RB2,IL18,IL4R,IL6,IL6ST,NGFR,STAT1,STAT3,STAT6,TGFB1,TGFBR2,TNFRSF1A
Role of Cytokines in Mediating Communication between Immune Cells	0	0.259	#NUM!	CSF2,CXCL8,IL12A,IL15,IL18,IL1A,IL1B,IL23A,IL24,IL32,IL36G,IL36RN,IL6,TGFB1
Maturity Onset Diabetes of Young (MODY) Signaling	0	0.286	#NUM!	CACNA1C,GAPDH,GCK,HNF1B,INSR,PDX1
Primary Immunodeficiency Signaling	0	0.2	#NUM!	ADA,CD19,CD8A,IKBKG,IL7R,LCK,RFXAP,TAP1,TAP2,TNFRSF13C
Allograft Rejection Signaling	0	0.0814	#NUM!	B2M,FAS,HLA-A,HLA-B,HLA-C,HLA-DOA,HLA-E
Autoimmune Thyroid Disease Signaling	0	0.122	#NUM!	FAS,HLA-A,HLA-B,HLA-C,HLA-DOA,HLA-E
Graft-versus-Host Disease Signaling	0	0.25	#NUM!	FAS,HLA-A,HLA-B,HLA-C,HLA-DOA,HLA-E,IL18,IL1A,IL1B,IL36G,IL36RN,IL6
Communication between Innate and Adaptive Immune Cells	0	0.229	#NUM!	B2M,CD8A,CSF2,CXCL8,HLA-A,HLA-B,HLA-C,HLA-E,IL12A,IL15,IL18,IL1A,IL1B,IL36G,IL36RN,IL6,TLR1,TLR2,TLR3,TLR6,TNFRSF13C,TNFSF13
Crosstalk between Dendritic Cells and Natural Killer Cells	0	0.247	-3.5	ACTB,ACTG1,CAMK2B,CAMK2G,CD226,CSF2,FAS,HLA-A,HLA-B,HLA-C,HLA-E,IL12A,IL15,IL15RA,IL18,IL6,MICA,MICB,NFKB1,NFKB2,TLN1,TLR3
Systemic Lupus Erythematosus Signaling	0	0.319	#NUM!	AKT1,AKT2,AKT3,BDKRB2,CAMK4,CBL,CD2BP2,GRB2,HLA-A,HLA-B,HLA-C,HLA-E,HNRNPA2B1,HNRNPC,IL18,IL1A,IL1B,IL36G,IL36RN,IL6,INPP5D,JUN,KRAS,LCK,LSM1,LSM11,LSM14B,LSM3,LSM4,LSM7,LYN,MAPK1,MAPK3,MRAS,NFATC1,NFATC3,NFATC4,PIK3C2A,PIK3C2G,PIK3C3,PIK3CA,PIK3CB,PIK3R1,PIM2,PLCG2,PRPF19,PRPF38A,PRPF40B,PRPF4B,PRPF8,PTPN6,RALA,RALB,RAP1B,RAP2B,RNPC3,RRAS,RRAS2,SNRNP200,SNRNP25,SNRNP40,SNRNP48,SNRNP70,SNRPA1,SNR…
Altered T Cell and B Cell Signaling in Rheumatoid Arthritis	0	0.3	#NUM!	CSF1,CSF2,FAS,HLA-A,HLA-B,HLA-DOA,IL12A,IL15,IL18,IL1A,IL1B,IL23A,IL36G,IL36RN,IL6,MAP3K14,NFKB1,NFKB2,RELB,SPP1,TGFB1,TLR1,TLR2,TLR3,TLR6,TNFRSF13C,TNFSF13
Atherosclerosis Signaling	0	0.317	#NUM!	ALOXE3,COL11A2,COL18A1,COL1A1,COL2A1,COL3A1,CSF1,CXCL12,CXCL8,CXCR4,F3,GLG1,ICAM1,IL18,IL1A,IL1B,IL36G,IL36RN,IL6,ITGA4,LCAT,LPL,NFKB1,NFKB2,PDGFA,PDGFB,PDGFC,PDGFD,PLA2G4A,PLA2G6,PLA2G7,PLA2R1,PLAAT3,PLAAT4,PNPLA3,PNPLA8,SERPINA1,TGFB1,TNFRSF12A,TNFRSF14
Pathogenesis of Multiple Sclerosis	0	0.111	#NUM!	CXCL11
B Cell Development	0	0.167	#NUM!	CD19,HLA-A,HLA-B,HLA-DOA,IL7,IL7R
Neuroprotective Role of THOP1 in Alzheimer's Disease	0	0.282	-1.528	APP,C1R,CFD,CREB1,ECE1,HLA-A,HLA-B,HLA-C,HLA-E,HTRA1,HTRA3,IDE,KLK5,KLK6,KLK7,MAPT,MME,NTS,PREP,PRKAG2,PRKAR1A,PRKAR2A,PRKAR2B,PRSS21,PRSS22,PRSS23,PRSS27,PRSS8,ST14,TAC1,TMPRSS11E,TPP1,YWHAE
Granzyme A Signaling	0	0.211	#NUM!	ANP32A,CREBBP,EP300,H1-10
Role of Lipids/Lipid Rafts in the Pathogenesis of Influenza	0	0.087	#NUM!	FDPS,RSAD2
Role of Hypercytokinemia/hyperchemokinemia in the Pathogenesis of Influenza	0	0.209	#NUM!	CXCL8,IL12A,IL15,IL18,IL1A,IL1B,IL36G,IL36RN,IL6
MSP-RON Signaling Pathway	0	0.31	#NUM!	ACTB,ACTG1,CSF1,IL12A,JAK2,KLK14,KLK5,KLK6,KLK7,MST1R,NOS2,PIK3C2A,PIK3C2G,PIK3C3,PIK3CA,PIK3CB,PIK3R1,TLR2
OX40 Signaling Pathway	0	0.167	0.333	B2M,BCL2L1,HLA-A,HLA-B,HLA-C,HLA-DOA,HLA-E,JUN,MAPK12,MAPK8,NFKB1,NFKB2,NFKBIA,NFKBID,NFKBIE
Extrinsic Prothrombin Activation Pathway	0	0.25	#NUM!	F3,FGB,TFPI,THBD
Intrinsic Prothrombin Activation Pathway	0	0.286	-0.302	COL11A2,COL18A1,COL1A1,COL2A1,COL3A1,F8,FGB,KLK14,KLK5,KLK6,KLK7,THBD
DNA Double-Strand Break Repair by Homologous Recombination	0	0.214	#NUM!	BRCA2,NBN,POLA1
Role of IL-17A in Psoriasis	0	0.308	#NUM!	CXCL1,CXCL3,CXCL8,IL17RC
Differential Regulation of Cytokine Production in Macrophages and T Helper Cells by IL-17A and IL-17F	0	0.278	#NUM!	CSF2,CXCL1,IL12A,IL1B,IL6
Differential Regulation of Cytokine Production in Intestinal Epithelial Cells by IL-17A and IL-17F	0	0.217	#NUM!	CSF2,CXCL1,IL12A,IL1A,IL1B
Hematopoiesis from Pluripotent Stem Cells	0	0.204	#NUM!	CD8A,CSF1,CSF2,CXCL8,IL11,IL12A,IL1A,IL6,IL7,LIF
Arsenate Detoxification I (Glutaredoxin)	0	0.25	#NUM!	GSTO1
Heparan Sulfate Biosynthesis	0	0.308	0.408	AARS1,B3GAT2,CES3,CHST11,CHST15,CHST2,CHST3,EXT1,EXT2,HS3ST1,HS3ST3A1,HS3ST3B1,HS6ST1,HS6ST3,LIPE,NDST1,PNPLA7,PRDX6,SULT1A2,SULT1C4,SULT2B1,SULT4A1,TARS2,UST
NAD Biosynthesis from 2-amino-3-carboxymuconate Semialdehyde	0	0.167	#NUM!	QPRT
Bupropion Degradation	0	0.12	#NUM!	CYP1B1,CYP2S1,CYP2U1
Retinoate Biosynthesis I	0	0.294	-1.667	AKR1B1,AKR1C3,ALDH1A2,ALDH1A3,BMP2,DHRS3,RBP7,RDH10,RDH13,SDR16C5
Thyroid Hormone Metabolism II (via Conjugation and/or Degradation)	0	0.211	-0.707	B4GAT1,EXT2,LARGE1,SULT1A2,SULT1C4,UGT1A1,UGT1A6,UGT2B7
NAD biosynthesis II (from tryptophan)	0	0.167	#NUM!	KYNU,QPRT
Nicotine Degradation III	0	0.179	-1.897	AOX1,B4GAT1,CYP1B1,CYP2S1,CYP2U1,EXT2,LARGE1,UGT1A1,UGT1A6,UGT2B7
Glutaryl-CoA Degradation	0	0.188	#NUM!	CDYL,CYP2S1,HSD17B10
Isoleucine Degradation I	0	0.2	#NUM!	ACADSB,DLD,HSD17B10
Retinoate Biosynthesis II	0	0.25	#NUM!	RBP7
Androgen Biosynthesis	0	0.25	-1	AKR1C3,HSD3B7,SRD5A1,SRD5A3
Ubiquinol-10 Biosynthesis (Eukaryotic)	0	0.235	-1	CYP26A1,MICAL1,MICAL2,MICAL3
Pyruvate Fermentation to Lactate	0	0.167	#NUM!	LDHC
Ketogenesis	0	0.182	#NUM!	BDH1,HMGCLL1
Heme Degradation	0	0.25	#NUM!	HMOX1
The Visual Cycle	0	0.3	-1.633	AKR1C3,DHRS3,LRAT,RBP7,RDH10,RDH13
PRPP Biosynthesis I	0	0.25	#NUM!	PRPS1
Sucrose Degradation V (Mammalian)	0	0.222	#NUM!	GALM,KHK
Melatonin Degradation I	0	0.183	-1.508	B4GAT1,CYP1B1,CYP2S1,CYP2U1,EXT2,LARGE1,SULT1A2,SULT1C4,UGT1A1,UGT1A6,UGT2B7
NAD Salvage Pathway II	0	0.231	-0.816	ACP3,ACP5,NT5C2,NT5C3B,NT5E,PXYLP1
Tetrapyrrole Biosynthesis II	0	0.2	#NUM!	UROS
Estrogen Biosynthesis	0	0.195	-0.707	AKR1C3,CYP1B1,CYP2S1,CYP2U1,HSD17B1,HSD17B10,HSD17B11,HSD17B7
Oleate Biosynthesis II (Animals)	0	0.154	#NUM!	ALDH6A1,UFSP2
Tryptophan Degradation X (Mammalian, via Tryptamine)	0	0.32	-1.414	ALDH1A2,ALDH1A3,ALDH3B1,ALDH4A1,ALDH7A1,ALDH9A1,MAOA,SMOX
Leukotriene Biosynthesis	0	0.154	#NUM!	GGT7,LTA4H
Histidine Degradation III	0	0.25	#NUM!	FTCD,MTHFD1L
Thioredoxin Pathway	0	0.286	#NUM!	NXN,SELENOT
Glutathione-mediated Detoxification	0	0.281	-0.707	GSTA4,GSTM2,GSTO1,GSTO2,GSTP1,GSTT2/GSTT2B,GSTZ1,LANCL1,MGST1
Eumelanin Biosynthesis	0	0.2	#NUM!	MIF
Nicotine Degradation II	0	0.154	-1.897	AOX1,B4GAT1,CYP1B1,CYP2S1,CYP2U1,EXT2,LARGE1,UGT1A1,UGT1A6,UGT2B7
Citrulline Biosynthesis	0	0.222	#NUM!	ALDH18A1,ARG2
Mevalonate Pathway I	0	0.143	#NUM!	IDI1,MVK
Valine Degradation I	0	0.278	2.236	ACADSB,ALDH6A1,DBT,DLD,HIBCH
α-tocopherol Degradation	0	0.25	#NUM!	CYP4F3
Serotonin Degradation	0	0.239	-1.5	ALDH1A2,ALDH1A3,ALDH3B1,ALDH4A1,ALDH7A1,ALDH9A1,B4GAT1,EXT2,LARGE1,MAOA,SMOX,SULT1A2,SULT1C4,UGT1A1,UGT1A6,UGT2B7
Phenylalanine Degradation IV (Mammalian, via Side Chain)	0	0.143	#NUM!	MAOA,SMOX
Bile Acid Biosynthesis, Neutral Pathway	0	0.231	#NUM!	AKR1C3,HSD3B7,SCP2
Tryptophan Degradation to 2-amino-3-carboxymuconate Semialdehyde	0	0.167	#NUM!	KYNU
Tryptophan Degradation III (Eukaryotic)	0	0.174	#NUM!	CDYL,CYP2S1,HSD17B10,KYNU
Ketolysis	0	0.1	#NUM!	BDH1
Glycolysis I	0	0.154	-1	BPGM,GAPDH,PFKP,PKM
Lysine Degradation V	0	0.2	#NUM!	ALDH7A1
Gluconeogenesis I	0	0.192	-0.447	BPGM,GAPDH,MDH2,ME1,ME3
Methylglyoxal Degradation III	0	0.111	#NUM!	AKR1B1,AKR1C3
2-oxobutanoate Degradation I	0	0.2	#NUM!	DLD
Superpathway of Melatonin Degradation	0	0.2	-1.941	B4GAT1,CYP1B1,CYP2S1,CYP2U1,EXT2,LARGE1,MAOA,SMOX,SULT1A2,SULT1C4,UGT1A1,UGT1A6,UGT2B7
Histidine Degradation VI	0	0.267	-1	CYP26A1,MICAL1,MICAL2,MICAL3
Noradrenaline and Adrenaline Degradation	0	0.229	-1.414	ALDH1A2,ALDH1A3,ALDH3B1,ALDH4A1,ALDH7A1,ALDH9A1,MAOA,SMOX
Glycoaminoglycan-protein Linkage Region Biosynthesis	0	0.143	#NUM!	B3GAT2
Pregnenolone Biosynthesis	0	0.308	-1	CYP26A1,MICAL1,MICAL2,MICAL3
Acetone Degradation I (to Methylglyoxal)	0	0.1	#NUM!	CYP1B1,CYP2S1,CYP2U1
Rapoport-Luebering Glycolytic Shunt	0	0.167	#NUM!	BPGM
Glucocorticoid Biosynthesis	0	0.0769	#NUM!	HSD3B7
Mineralocorticoid Biosynthesis	0	0.0833	#NUM!	HSD3B7
dTMP De Novo Biosynthesis	0	0.2	#NUM!	DHFR
Glycine Betaine Degradation	0	0.1	#NUM!	SDSL
Ethanol Degradation II	0	0.281	-0.333	ACSL1,ACSS1,ACSS3,ALDH1A2,ALDH1A3,ALDH3B1,ALDH4A1,ALDH7A1,ALDH9A1
Fatty Acid β-oxidation I	0	0.312	0.632	ACADM,ACSL1,ACSL4,ACSL5,ECI1,ECI2,HSD17B10,SCP2,SLC27A4,SLC27A6
Tyrosine Degradation I	0	0.2	#NUM!	GSTZ1
Phenylalanine Degradation I (Aerobic)	0	0.25	#NUM!	PCBD2
Aspartate Degradation II	0	0.143	#NUM!	MDH2
Methionine Degradation I (to Homocysteine)	0	0.273	0	AHCYL1,EEF1AKMT2,MAT2B,PRMT3,PRMT5,SUV39H2
Superpathway of Methionine Degradation	0	0.27	1.265	AHCYL1,CBS/CBSL,CTH,DLD,EEF1AKMT2,MAT2B,MTR,PRMT3,PRMT5,SUV39H2
Molybdenum Cofactor Biosynthesis	0	0.25	#NUM!	MOCS3
Folate Transformations I	0	0.222	#NUM!	MTHFD1L,MTR
Superpathway of Geranylgeranyldiphosphate Biosynthesis I (via Mevalonate)	0	0.222	1	FDPS,GGPS1,IDI1,MVK
GDP-mannose Biosynthesis	0	0.167	#NUM!	MPI
Agranulocyte Adhesion and Diapedesis	0	0.301	#NUM!	ACTB,ACTG1,CD99,CDH5,CLDN1,CLDN11,CLDN12,CLDN15,CLDN16,CLDN23,CLDN4,CLDN7,CXCL1,CXCL11,CXCL12,CXCL16,CXCL2,CXCL3,CXCL8,CXCR4,EZR,FN1,GLG1,GNAI1,GNAI2,GNAI3,HRH1,ICAM1,ICAM2,IL18,IL1A,IL1B,IL1R1,IL36G,IL36RN,ITGA1,ITGA2,ITGA3,ITGA4,ITGA5,ITGA6,ITGB1,JAM3,MMP11,MMP14,MMP16,MMP2,MSN,MYH10,MYH3,MYH9,MYL6,MYL6B,MYL9,RDX,SDC4,TNFRSF1A,XCL1
Granulocyte Adhesion and Diapedesis	0	0.306	#NUM!	CD99,CDH5,CLDN1,CLDN11,CLDN12,CLDN15,CLDN16,CLDN23,CLDN4,CLDN7,CXCL1,CXCL11,CXCL12,CXCL16,CXCL2,CXCL3,CXCL8,CXCR4,EZR,GLG1,GNAI1,GNAI2,GNAI3,HRH1,ICAM1,ICAM2,IL18,IL1A,IL1B,IL1R1,IL1RAP,IL1RL1,IL1RL2,IL36G,IL36RN,ITGA1,ITGA2,ITGA3,ITGA4,ITGA5,ITGA6,ITGB1,JAM3,MMP11,MMP14,MMP16,MMP2,MSN,NGFR,RDX,SDC1,SDC2,SDC4,TNFRSF1A,XCL1
Serotonin Receptor Signaling	0	0.279	#NUM!	ADCY1,ADCY3,ADCY6,ADCY7,ADCY9,HTR1D,HTR2C,HTR6,HTR7,MAOA,PTS,SMOX
Phototransduction Pathway	0	0.245	#NUM!	CNGA1,GNB1,GNB3,GNB5,GNGT1,GUCY1A1,GUCY1A2,GUCY1B1,OPN3,PRKAG2,PRKAR1A,PRKAR2A,PRKAR2B
Th1 and Th2 Activation Pathway	0	0.31	#NUM!	ACVR1,ACVR2B,BHLHE41,BMPR2,CD274,CD8A,CHD4,CXCR4,DLL4,GFI1,GRB2,HLA-A,HLA-B,HLA-DOA,ICAM1,ICOSLG/LOC102723996,IFNGR1,IL12A,IL12RB2,IL18,IL1RL1,IL24,IL4R,IL6,IRF1,JAG1,JAG2,JAK2,JUN,LGALS9,MAF,NFATC1,NFATC3,NFATC4,NFKB1,NOTCH1,NOTCH2,PIK3C2A,PIK3C2G,PIK3C3,PIK3CA,PIK3CB,PIK3R1,PSEN1,PSEN2,SOCS3,STAT1,STAT3,STAT5A,STAT6,TGFB1,TGFBR2,TGFBR3
Th1 Pathway	0	0.281	-1.89	CD274,CD8A,DLL4,GRB2,HLA-A,HLA-B,HLA-DOA,ICAM1,ICOSLG/LOC102723996,IFNGR1,IL12A,IL12RB2,IL18,IL6,IRF1,JAK2,LGALS9,NFATC1,NFATC3,NFATC4,NFKB1,NOTCH1,NOTCH2,PIK3C2A,PIK3C2G,PIK3C3,PIK3CA,PIK3CB,PIK3R1,PSEN1,PSEN2,SOCS3,STAT1,STAT3
Th2 Pathway	0	0.294	-0.522	ACVR1,ACVR2B,BHLHE41,BMPR2,CHD4,CXCR4,GFI1,GRB2,HLA-A,HLA-B,HLA-DOA,ICAM1,ICOSLG/LOC102723996,IL12A,IL12RB2,IL1RL1,IL24,IL4R,JAG1,JAG2,JAK2,JUN,MAF,NFKB1,NOTCH1,NOTCH2,PIK3C2A,PIK3C2G,PIK3C3,PIK3CA,PIK3CB,PIK3R1,PSEN1,PSEN2,SOCS3,STAT5A,STAT6,TGFB1,TGFBR2,TGFBR3
Th17 Activation Pathway	0	0.275	-2.449	AHR,CSF2,HIF1A,HSP90B1,IL12A,IL12RB2,IL1B,IL1R1,IL23A,IL6,IRAK1,IRAK3,IRAK4,JAK2,MYD88,NFATC1,NFATC3,NFATC4,NFKB1,NFKB2,PTGER4,RORA,RUNX1,SOCS3,STAT3
SPINK1 Pancreatic Cancer Pathway	0	0.233	3.207	CPA4,CPD,CPM,CTSA,CTSB,F2RL1,KLK14,KLK5,KLK6,KLK7,SMAD2,SMAD3,TGFB1,TGFBR2
Systemic Lupus Erythematosus In T Cell Signaling Pathway	0	0.297	-0.606	AKT1,AKT2,AKT3,ATF4,B2M,CAMK4,CASP1,CASP10,CASP3,CASP4,CASP6,CASP7,CASP8,CBL,CHP1,CREB1,CREB3,CREB5,CREBBP,ELF1,EZR,FAS,GADD45A,GNA12,GNA13,GNAI1,GNAI2,GNAI3,GNB1L,GRB2,HLA-A,HLA-B,HLA-C,HLA-DOA,HLA-E,ICOSLG/LOC102723996,IL23A,IL6,ITPR1,JUN,KRAS,LEPR,MAP2K1,MAP2K2,MAPK1,MAPK3,MLST8,MRAS,MSN,NOS2,ORAI1,PDK1,PIK3C2A,PIK3C2G,PIK3C3,PIK3CA,PIK3CB,PIK3R1,PPM1L,PPP2CA,PPP2CB,PPP2R1B,PPP2R2A,PPP2R2B,PPP…
Complement System	0	0.216	-0.378	C1QBP,C1R,C1S,C3,CD46,CD59,CFD,CFH
Eicosanoid Signaling	0	0.242	-0.632	AKR1C3,ALOX5AP,LCAT,LTA4H,PLA2G4A,PLA2G6,PLA2G7,PLA2R1,PLAAT3,PLAAT4,PNPLA3,PNPLA8,PTGER4,PTGES,PTGS1,PTGS2
