# Supplementary material for: Single-cell transcriptome analysis defines heterogeneity of the murine pancreatic ductal tree
Source: eLife. 2021 May 19;10:e67776. doi: 10.7554/eLife.67776 (PMC8184217; doi:10.7554/eLife.67776)
Supplement: Figure 6—source data 3. [file elife-67776-fig6-data3.xls]

## Sheet: HPDE SPP1 KO vs scr gRNA
© 2000-2020 QIAGEN. All rights reserved.
Upstream Regulator	Expr Log Ratio	Molecule Type	Predicted Activation State	Activation z-score	p-value of overlap	Target Molecules in Dataset	Mechanistic Network
TP53	0.87	transcription regulator	Inhibited	-5.476	1.07e-53	ABCB1,ABCB4,ABCC1,ABHD4,ACACB,ACADL,ACADM,ACADS,ACADVL,ACER2,ACLY,ACO2,ACOT11,ACSF2,ACSL1,ACSS1,ACTB,ACTL6A,ACTN1,ACTN4,ADA,ADAM12,ADAM8,ADAMTSL4,ADGRB1,ADGRB3,ADGRE5,ADRB2,AGTR1,AIFM2,AK3,AKAP9,AKR1B1,AKT1,AKT3,ALDH18A1,ALDH1A2,ALDH1A3,ALDH4A1,ALDH9A1,AMOTL2,ANKRD1,ANLN,ANXA1,ANXA2,ANXA3,ANXA4,ANXA6,APBB2,APP,AQP3,ARAP2,AREG,ARHGAP1,ARHGAP5,ARHGEF4,ARRB1,ARRB2,ASL,ASTN2,ASXL1,ATAD2,ATF4,ATG4C,AT…	2451 (19)
ESR1	0.676	ligand-dependent nuclear receptor		-1.291	6.43e-42	AASS,ABCA3,ABCB1,ABCC3,ABHD2,ABLIM1,ACLY,ACOX1,ACSL1,ADA,ADAM17,ADAMTS13,ADCY1,ADGRG6,AHNAK,AKAP1,AKT1,AKT2,ALCAM,ALOX5AP,ANAPC5,ANK3,ANLN,ANO10,ANP32A,ANXA3,ANXA4,AP1G2,AP1S1,AP1S3,AP2B1,AP2S1,AP4M1,AQP3,AREG,ARFIP2,ARHGAP1,ARHGAP18,ARHGEF7,ARL4D,ARPC5L,ARRB1,ATF5,ATG13,ATP11A,ATP1B1,ATP2A3,ATP2B1,ATP6V1H,AURKA,AXIN2,BAG1,BCL2L1,BCL2L2,BCLAF1,BCR,BDNF,BET1L,BIN1,BIRC3,BIRC5,BMP2,BMP4,BMPR2,BRCA2…	2725 (19)
HRAS	-0.278	enzyme	Inhibited	-2.212	1.42e-34	ACADM,ACLY,ACTB,ACTG1,ADARB1,ADGRE5,ADM,ADRA2C,AFAP1L1,AKT1,ALDH1A3,AMOTL2,ANKRD1,ANXA2,ANXA3,ANXA6,APP,AREG,ARF1,ARF6,ASAP1,ATP2A2,ATP5F1B,ATP5PF,AURKA,B2M,B3GNT5,BAK1,BCL2L1,BIRC3,BIRC5,BMP1,BMP4,BMP7,BOK,CACNG4,CACNG8,CALD1,CALU,CAPG,CAPN2,CAV1,CBX2,CCDC80,CCN1,CCN2,CCNB1,CCND1,CCND3,CCNG1,CD24,CD81,CDC25A,CDC42BPA,CDH1,CDH3,CDK1,CDK18,CDK2,CDK7,CDKN1B,CDKN2B,CDKN2D,CDON,CDX2,CEBPB,CEBPD,CFH,C…	2170 (19)
beta-estradiol		chemical - endogenous mammalian		-1.254	2.27e-32	A4GALT,AARS1,ABCA1,ABCA3,ABCB1,ABCB10,ABHD5,ABLIM1,ACADM,ACADVL,ACER2,ACOX1,ACP3,ACP5,ACSL1,ACTB,ACTL6A,ACVR2B,ADA,ADCY1,ADCY9,ADGRG2,ADK,ADM,ADRB2,AFF4,AGRN,AGTR1,AHR,AKAP1,ALCAM,ALDH18A1,ALDH1A2,ALDH4A1,ALDH6A1,ALDH7A1,ALPP,ALX4,AMOTL1,AMOTL2,ANK3,ANKRD12,ANXA1,ANXA3,ANXA4,APBA1,APBB1,APCDD1,APP,ARC,AREG,ARHGEF39,ARL4A,ARNT2,ARRB2,ASB1,ATAD2,ATF5,ATP1B1,ATP2B1,ATP5F1B,ATP5MC2,ATP5PB,AURKA,BACE2…	2919 (20)
MYC	0.339	transcription regulator	Activated	6.071	3.37e-31	ABCA1,ABCA7,ABCB10,ABCC1,ABCC3,ABCC4,ABCD3,ABCF3,ABCG4,ACADM,ACLY,ACSL4,ACSS1,ACTB,ACTN1,ACTN4,ACVR1,ADARB1,ADD1,ADIPOR1,ADK,ADM,AHR,AK2,AKAP1,AKT1,ALCAM,ALDH18A1,ANXA4,ANXA6,AOPEP,APCDD1,APP,ARF3,ARHGAP25,ARHGEF7,ASCL2,ATAD3A,ATF4,ATP5IF1,AXIN1,AXL,BAG1,BBC3,BCL2A1,BCL2L1,BCOR,BCR,BDNF,BIN1,BIRC2,BIRC5,BMI1,BOP1,BRD2,C12orf49,C1QBP,CAMK2N1,CANX,CAPN2,CAPNS1,CAPZB,CASP1,CASP10,CASP3,CASP8,CAST,CA…	2709 (19)
decitabine		chemical drug	Inhibited	-5.06	1.55e-28	ABCB1,ABCB10,ABCC1,ABCC3,ABCC4,ABCC8,ADAM23,ADGRB1,ADGRL2,ADRB2,AGRN,AKT2,ALDH1A2,AMOT,ANGPTL4,ANKRD1,ANP32A,ANXA2,ARHGDIB,B2M,B3GNT2,BAIAP2,BCL11A,BCL2L2,BDNF,BID,BIRC3,BMP4,BMPR2,BRCA2,BRD2,BTG3,CA9,CADM1,CASP8,CAV1,CCN2,CCNA1,CCND1,CCND3,CD226,CD58,CD8A,CD9,CDA,CDC42BPG,CDCA7,CDH1,CDH13,CDH2,CDH3,CDH4,CDK1,CDK6,CDKN1B,CDKN2B,CDKN2D,CFLAR,CGREF1,CHFR,CNTN1,COL1A1,COL3A1,COL7A1,CRABP2,CREB1,CREB…	2725 (21)
TGFB1	-1.737	growth factor	Inhibited	-6.482	1.9e-28	AASS,ABCA1,ABLIM3,ACLY,ACP3,ACSS1,ACTN1,ACVR1,ADAM10,ADAM12,ADAM17,ADAM19,ADAMTS2,ADAMTS3,ADCY9,ADGRB1,ADGRG2,ADI1,ADK,ADM,AHNAK,AHR,AIF1L,AKT1,ALDH18A1,ALDH5A1,ALOX5AP,ALPP,AMOTL2,ANGPTL4,ANKLE2,ANKRD1,ANXA11,ANXA2,AOPEP,APLN,APP,AREG,ARF1,ARHGAP19,ARHGAP35,ARHGEF19,ARL4A,ARNT2,ARPC2,ATF4,ATG5,ATP13A3,AXL,B2M,B4GAT1,BAD,BAMBI,BBC3,BCL2L1,BCL3,BDH1,BDKRB2,BDNF,BGN,BHLHE40,BIN1,BIRC5,BMI1,BMP1,BMP…	2636 (18)
tazemetostat		chemical drug	Inhibited	-2.261	1.43e-26	ABCB10,ABCC4,AKT2,AMOT,ANKRD1,ANP32A,B3GNT2,BAIAP2,BCL11A,BCL2L2,BDNF,BID,BRD2,CCND1,CD58,CDCA7,CDH1,CDH2,CDK6,CFLAR,CNTN1,CRABP2,CREB1,CREBBP,CRMP1,CTBP2,CTNNB1,CUL1,CUX1,CYP26A1,DDR2,DDX6,DHRS3,DPYSL4,DSG2,E2F3,E2F5,EFNA3,EFNB1,EFNB2,EFNB3,EGFR,EHD1,EHMT2,EIF2AK2,EIF4B,ELF4,EMX2,EPHA3,EPHB3,ERBB2,EZR,FEZ1,FGF2,FGFR1,FN1,FOXA1,FOXC1,FRYL,FUBP1,GATA6,GDI1,GLI2,GRB2,HMGB1,HMGN5,HNRNPA2B1,HNRNPD,HO…	1505 (13)
SP2509		chemical reagent	Inhibited	-2.259	1.88e-26	ABCB10,ABCC4,AKT2,AMOT,ANKRD1,ANP32A,B3GNT2,BAIAP2,BCL11A,BCL2L2,BDNF,BID,BRD2,CCND1,CD274,CD58,CDCA7,CDH1,CDH2,CDK6,CENPF,CFLAR,CNTN1,CRABP2,CREB1,CREBBP,CRMP1,CTBP2,CTNNB1,CUL1,CUX1,CYP26A1,DDR2,DDX6,DHRS3,DPYSL4,DSG2,E2F3,E2F5,EFNA3,EFNB1,EFNB2,EFNB3,EGFR,EHD1,EHMT2,EIF2AK2,EIF4B,ELF4,EPHA3,EPHB3,ERBB2,EZR,FEZ1,FGF2,FGFR1,FN1,FOXA1,FOXC1,FRYL,FUBP1,GATA6,GDI1,GLI2,GRB2,HMGB1,HMGN5,HNRNPA2B1,HN…
camptothecin		chemical drug		-0.989	3.22e-26	ABCB1,AKAP9,AKT2,ANO9,ANXA2,ANXA4,APBB2,ARAP2,ARHGDIA,ARHGEF1,ARL4A,ARRB2,AURKA,BAD,BAK1,BAMBI,BBC3,BCL11A,BCL2A1,BCL2L1,BDKRB1,BFAR,BID,BIRC2,BIRC3,BIRC5,BRCA2,BTG3,BTN3A3,C11orf95,C1orf216,CABIN1,CAMK2B,CAMK2G,CASP1,CASP3,CASP4,CASP8,CAST,CCNB1,CCND1,CCNG1,CD46,CD47,CD59,CDC25A,CDIPT,CDK1,CDK2,CDK6,CFLAR,CHAC1,CHCHD7,CHEK1,CHST11,CLASP1,CLTB,CREB1,CRYBG1,CSF1,CSF2,CSNK1G2,CTNND1,CXCL1,CXCL2,CXC…	2150 (15)
ERBB2	-0.896	kinase	Inhibited	-2.965	1.1e-25	ABHD5,ABRACL,ACSL4,ACTB,ADAM12,ADAM17,ADAM19,ADAM8,ADIPOR2,AHNAK,AKT1,AKT2,ANGPTL4,ANXA2,APLP2,AREG,ATF4,AURKA,BCL2L1,BCL3,BEX2,BHLHE40,BIRC3,BIRC5,BMP1,BMP7,BNIP2,BRIP1,CADM1,CAPN15,CAPZA2,CAVIN1,CCDC80,CCN2,CCN5,CCNB1,CCNB2,CCND1,CCND3,CCNE2,CD47,CD59,CD82,CD9,CDC14B,CDC16,CDC23,CDC25A,CDC25B,CDC37L1,CDC40,CDC42BPG,CDC42EP3,CDC42SE1,CDC45,CDC6,CDC7,CDCA3,CDCA7,CDCA7L,CDCA8,CDH1,CDH2,CDH3,CDK1,C…	2196 (16)
TNF	-3.212	cytokine	Inhibited	-9.701	1.36e-25	A4GALT,AAK1,ABCA1,ABCC1,ABCC3,ABR,ACADM,ACADS,ACADVL,ACOX1,ACP5,ACSL1,ACTB,ADAM17,ADAM8,ADGRG6,ADM,ADRB2,AGFG2,AGTR1,AK2,AKR1B1,ALCAM,ALDH1A3,ALOX5AP,AMH,AMPD3,ANGPTL4,ANK3,ANXA1,ANXA11,APLN,APOBEC3B,APP,AQP3,ARC,ARHGAP18,ARHGAP23,ARHGDIB,ARHGEF17,ARSI,ASCL2,ATF4,ATP2A2,ATP2B1,ATP5PF,AXIN1,AXIN2,B2M,B4GALNT1,B4GALT1,BAMBI,BBC3,BBOX1,BCL10,BCL2A1,BCL2L1,BCL2L13,BCL2L2,BCL3,BDKRB1,BDKRB2,BDNF,BGN,B…	1499 (12)
dexamethasone		chemical drug		-0.697	1.43e-25	A4GALT,AACS,ABCA1,ABCB1,ABCB4,ABCC1,ABCC3,ABCC8,ABHD2,ACADL,ACADM,ACADS,ACLY,ACOX1,ACSL1,ACSL4,ACTB,ACTG1,ACTR3,ADAM10,ADAM12,ADAM15,ADAM17,ADAM9,ADAMTS15,ADAMTS19,ADAMTS2,ADGRF4,ADGRL1,ADM,ADRB2,AGAP5 (includes others),AKR1C3,AKT1,ALCAM,ALDH18A1,ALDH4A1,ALDH6A1,ALOX5AP,ALPL,AMIGO2,AMPD3,ANGPTL4,ANK2,ANKRD1,ANOS1,ANXA1,ANXA3,APLN,APOL6,APP,AREG,ARG2,ARHGAP17,ARHGAP23,ARHGAP24,ARHGAP25,ARHGDIA,ARH…	2727 (22)
trichostatin A		chemical drug	Inhibited	-3.516	1.59e-24	ABCA1,ABCB1,ABCB10,ABCC4,ABHD5,ACTB,ADCY1,ADGRL2,AGRN,AKT2,ALPL,AMOT,ANKRD1,ANP32A,ANXA6,APP,ARC,ARFIP2,ARHGAP1,ATAD2,ATG9B,B2M,B3GNT2,BAD,BAG1,BAIAP2,BAK1,BBC3,BCL11A,BCL2A1,BCL2L1,BCL2L2,BDNF,BID,BIK,BMP2,BMP4,BRCA2,BRD2,BRMS1,C1QTNF6,CA9,CASP3,CAST,CCNA1,CCNB2,CCND1,CD14,CD58,CD9,CDC123,CDC42BPG,CDC6,CDCA7,CDH1,CDH2,CDK1,CDK6,CDKN1B,CDKN2B,CDKN2D,CENPM,CFLAR,CGREF1,CHEK1,CKS1B,CLDN1,CNTN1,COCH…	2545 (20)
OSM	1.354	cytokine	Inhibited	-5.73	1.94e-23	ABCA1,ABCC1,ABCC3,ABCC4,ABCC8,ACOT2,ACSL5,ADAM17,ADAMTS3,ADGRG6,AHCYL1,AHR,AKR1C3,AMPD3,ANXA1,ANXA2,ANXA3,ARF6,ARFGEF2,ARHGEF12,ARL4A,ARL4C,ARTN,ASAH1,ATP13A3,B2M,BAIAP2,BAK1,BAMBI,BBOX1,BCL10,BCL3,BHLHE40,BMI1,BTC,C1R,C1S,CADM4,CASK,CASP4,CAT,CCND1,CD24,CDA,CDC42EP4,CDH1,CDH2,CDH3,CDH8,CDK17,CDKN1B,CEBPD,CGB3 (includes others),CLDN4,CLEC2B,CLIP1,COL1A1,COL2A1,COL3A1,COL6A1,COL8A1,COX7B,CPM,CRY1,…	2267 (16)
TP63	-7.272	transcription regulator	Inhibited	-4.449	2.99e-22	ABCB1,ACTL6A,ADA,ADM,ADRM1,AHR,AKT1,ALDH1A3,ANOS1,APOBEC3B,AREG,ARL14EP,ATG4C,ATG5,AXL,B9D1,BAD,BBC3,BCL2L1,BCL3,BDKRB2,BHLHE40,BLM,BMP4,BMP7,BOK,BST2,CASP3,CAST,CCN1,CCN2,CCNB1,CCND1,CCND3,CCNG1,CD82,CDH1,CDH2,CDH3,CDK1,CDK17,CDK18,CDK6,CDKN1B,CDKN2B,CEACAM1,CFLAR,COL4A1,COL5A1,CPT2,CSTA,CTNNB1,CTSD,CXCL8,CXCR4,CYGB,DDAH1,DDB2,DKK1,DKK3,DLX1,DOK1,DST,DUSP10,DUSP6,E2F1,ECM1,EGFR,EMID1,EMP1,ENG,EN…	2172 (17)
CST5		other		-1.74	3.07e-22	ABCC1,ABLIM1,ABT1,ADRM1,ADSL,AHCTF1,AHNAK,ANK3,ANXA2,ANXA3,ANXA6,ARF6,ARHGAP29,ATP2C2,ATP8B1,ATR,BCAP31,CAMK2G,CAV1,CBY1,CDH1,CEMIP,CEP170,CHD3,CLDN7,COL12A1,CREBBP,CTSB,DCAF1,DCP1A,DDX54,DECR1,DHX9,DNAJA3,DNAJB11,DOCK5,DOCK9,DRAP1,DSP,EDC3,EIF2B1,ELK3,EPN3,ESRP1,ESRRA,EVA1C,EVPL,EZR,FAM133B,FBXO2,FER,FHL1,FRAS1,GALNT5,GAR1,GDA,GEMIN7,GNL3,GOLGA2,GPRC5A,HNRNPA2B1,HNRNPA3,HNRNPC,HNRNPDL,HNRNPH1,HN…
KRAS	0.41	enzyme		0.204	4.79e-22	ABCA1,ABCC4,ACLY,ACTR3,AGRN,AHCTF1,AHNAK,AHR,AMPD3,AMPH,AOX1,APLP2,AREG,ARPC3,ARPP19,ASCL2,ATAD3A,ATG5,ATP1B1,AXIN2,AXL,B2M,BAG1,BAK1,BCL2A1,BCL2L1,BCL7C,BDH1,BEX1,BGN,BIRC3,BIRC5,BMI1,BMP4,BNC1,BTC,CAMK1,CASP1,CASP3,CAV1,CAVIN1,CBX5,CCDC80,CCN2,CCNB1,CCND1,CCND3,CCP110,CD274,CDH1,CDH2,CDH3,CDKN1B,CDKN2B,CDT1,CEACAM1,CEBPB,CLIC5,CLNS1A,COL1A1,COL3A1,COL4A1,CTNNB1,CXCL8,DBN1,DCLK1,DDAH1,DENND2B,DH…	2227 (18)
NUPR1	3.369	transcription regulator	Inhibited	-3.119	5.21e-22	ABL2,ACSS1,ACTR3B,ADCY9,ADGRG1,ADGRL3,ADM,ADRB2,AGRN,ALDH5A1,ALG8,ALOXE3,ANGEL1,ANK3,ANP32A,ANP32E,APOBEC3B,AREG,ARHGAP11A,ARHGEF26,ASIC1,ATP6V0A1,ATP8B1,ATR,AURKA,AVPI1,B3GNT5,BCL9,BLM,BRI3BP,BRINP3,C8orf58,CACNA2D2,CAMK2N1,CARMIL1,CCN1,CCNB2,CCNF,CD63,CDC23,CDCA3,CDCA8,CDK2,CDKN1B,CEBPB,CENPL,CEP170B,CERK,CHD4,CHMP1B,CKAP2L,CNPY4,COA5,COL3A1,CREB5,CROT,CXCL3,CXCL8,CXCR4,CYSTM1,DENND5B,DEPTOR,DH…	1548 (7)
FOS	-0.347	transcription regulator	Inhibited	-2.281	8.59e-22	ABCB1,ABCC1,ACOX1,ACTG1,ADAM12,ADD2,ADNP,AFF4,AGTR1,AKR1C3,ALDH1A3,ALPP,ANK3,ANKRD2,ANXA4,APLN,APLP2,AQP3,ARF1,ARID3A,ARNT,ARNTL2,ARPC5,ASAP1,ASL,ATP2C1,B4GALT1,BCAR3,BCL9,BDNF,C3,CADM1,CALU,CAPN2,CASP3,CASP4,CAST,CAT,CCN2,CCND1,CCNG1,CD14,CD164,CDH1,CDON,CELF2,CERS4,CFD,CFLAR,CLIP1,COBLL1,COL16A1,COL18A1,COL1A1,COL6A1,COL8A2,CRABP2,CRB3,CREBBP,CSTA,CTH,CTNND1,CTSB,CTSH,CTSV,CXCL16,CXCL3,CXCL8,CY…	2281 (15)
CTNNB1	0.426	transcription regulator		0.728	1.01e-21	ABCB1,ABCC1,ABCD4,ABCF3,ACADL,ACADS,ACADVL,ACLY,ACTB,ACTN4,ACTR3,ACTR8,ADAM17,ADGRG2,ADGRV1,ADRA2C,AGRN,AHR,ALCAM,ALDH1A2,ALDH1A3,ANXA1,APCDD1,APP,ARHGDIA,ARL4A,ARMC4,ARMH4,ASCL2,ATP6V0A1,AURKA,AXIN2,BAMBI,BBC3,BCAP31,BCL2L1,BCL2L10,BDNF,BGN,BHLHE40,BIRC5,BMP1,BMP2,BMP4,BMP7,BRMS1L,BTF3,CA9,CACNA1G,CADM1,CALM1 (includes others),CAPN1,CAPNS1,CAPZB,CASP7,CCN1,CCN2,CCNA1,CCND1,CCNE2,CD47,CD99,CDH1,C…	2509 (22)
geldanamycin		chemical - endogenous non-mammalian		-0.307	5.31e-19	ADAT2,AHSA1,AIP,AKR1B1,AKT2,ANXA1,ANXA2,ANXA7,ARF1,ARRB2,AURKA,BCL11B,BCL2L1,BGN,BIN1,BIRC5,BRI3,CACYBP,CARS1,CASP8,CCDC149,CCND1,CCND3,CDC5L,CDH24,CDH5,CDK1,CDK5,CDKN2AIP,CEBPD,CELF2,CEP55,CFLAR,CHEK1,CHORDC1,CNOT7,CNP,COL6A2,COX18,CUL5,CXCL8,CXorf56,DHX9,DLGAP5,DNAJB2,DNAJC7,DRG1,EGFR,EIF2AK2,EIF2S1,ELOB,ERBB2,FAT1,FAU,FBLN2,FGFR1,FKBP4,FKBP5,FUS,FYN,GBP1,GNAO1,GRK2,GRK3,GSTP1,H2AX,HACD3,HEXB,H…	2548 (22)
Sos		group			9.43e-19	ABCC1,ACOX1,ADAM12,ADD2,ADNP,AFF4,AKR1C3,ALDH1A3,ANK3,APLN,APLP2,AQP3,ARID3A,ARNT,ASAP1,ATP2C1,B4GALT1,BCAR3,CADM1,CAST,CAT,CCNG1,CERS4,CLIP1,COBLL1,COL16A1,CRABP2,CREBBP,CTNND1,DAP,DAPK2,DLG1,DSG3,E4F1,EEA1,ELOVL3,ENAH,EPS8,FBLIM1,GATA4,GBA,GJB6,GM2A,GSK3B,GSR,HIPK3,HMOX1,HSD17B10,HSPB8,IGFBP5,IL36G,IRS2,ITGA6,ITGB1,KCNN4,KIF5B,KLF6,KRAS,LAMA3,LARGE1,LGALS3BP,LIN9,LRP8,LTBP3,MAFK,MAOA,MAP3K20,MA…	2082 (17)
FSH		complex	Inhibited	-2.295	1.03e-18	ACP3,ACP5,ACTB,ACTN1,ADAM17,ADCY7,ADCY9,ADGRG1,ADM,AHR,ALPL,AMH,AMOTL2,APLN,AQP3,AREG,ARHGAP1,ARHGAP35,ARL4C,ARPC1A,ATP2A2,ATP2B1,ATP5IF1,AXIN2,AXL,BAD,BAG1,BCKDK,BCL11A,BCL2L2,BDNF,BMPR2,BTC,CAMK2G,CAMK4,CARD10,CASP4,CCN2,CCND1,CDC42EP4,CDH2,CDK6,CFLAR,CITED1,CLEC11A,CLIP1,COL18A1,CREBL2,CRYM,CSNK1A1,CTNNB1,CTNND1,CTSV,CXCR4,CYFIP2,DAPK1,DHCR7,DHRS3,DLX5,DNAJB9,DUSP1,DUSP14,DUSP9,DYRK3,ECEL1,EFN…	2828 (22)
TP73	-0.943	transcription regulator		-0.296	1.74e-18	ABCB1,ABCC1,ADA,ADAM10,ADAM17,ADAM19,ADAM23,ANGPTL4,ATG4C,ATG5,AURKA,B2M,BAK1,BAP1,BBC3,BDKRB2,BHLHE40,BID,BIRC2,BIRC5,BLZF1,BMP7,C1R,C3,CADM1,CAMLG,CASP1,CASP3,CASP4,CCN1,CCN5,CCNB1,CCND3,CCNF,CCNG1,CDC25B,CDH1,CDK1,CDK2,CDKN1B,CDKN3,CITED1,CLEC7A,CLMN,CNN3,CNTFR,COL18A1,COL1A1,CTH,CTNNB1,CTSD,CXCL1,CXCL2,CXCL3,DAB1,DBP,DHFR,DHRS3,DLG1,DMC1,DRAM1,DTYMK,DUSP11,ECM1,EDA,EDN1,EGFR,EGR1,ELOB,ELOC,EN…	2093 (19)
miR-124-3p (and other miRNAs w/seed AAGGCAC)		mature microRNA	Activated	5.568	2.19e-18	ABHD5,ACTR8,AHR,AK2,ALDH9A1,ARFIP1,ARHGAP29,ARHGEF1,ARRDC1,ATL3,ATP6V0E1,B4GALT1,BDNF,BLOC1S6,BTG3,CAPRIN2,CAV1,CCN2,CD164,CD59,CDC14B,CDCA7,CDCA7L,CDK2,CDK6,CHP1,CHST14,CLDND1,CTDSP1,CTDSP2,CTNND1,CYP1B1,DCTD,DEPDC1,DFFB,DLX2,DRAM1,DVL2,E2F5,ECI2,EGR1,ELF4,ELK3,ELOVL1,ENDOD1,F11R,FAM104A,FAM177A1,FAM83H,FCHO2,GAS2L1,GINM1,GMCL1,GNAI3,GSK3B,GSN,HDAC5,HEBP2,IFRD2,IQGAP1,ITGB1,ITPRID2,JAG1,KANK1,KA…
MAPK1	-0.372	kinase	Activated	5.979	1.11e-17	ADAM12,ADAM17,ANGPTL4,ANTXR2,APOL6,ARC,ARG2,ARHGAP11A,ATP1B1,ATP2A1,AURKA,BCL11A,BDNF,BICRAL,BIRC5,BLZF1,BST2,BTN3A3,C1S,CAPN2,CAV1,CCDC80,CCDC82,CCN2,CCNB1,CCND1,CCNF,CDH1,CDH2,CDKN1B,CHST2,COL7A1,COX17,CPPED1,CRABP2,CRYBG1,CSGALNACT2,CSTA,CTNNB1,CTSB,CXCL11,CXCL8,DDX58,DEPTOR,DLX3,DSE,DUSP1,E2F1,EGLN3,EGR1,EHD1,EIF2AK2,EMP1,ENDOD1,EPCAM,ERAP1,ERCC1,FBXO32,FCMR,FHL2,FLNC,FN1,FOSL2,FOXO1,GBP1,GBP…	2230 (16)
NFKBIA	-2.335	transcription regulator	Inhibited	-2.222	1.69e-17	ABCD3,ADGRE5,AGTR1,AK2,AMPD3,ANKRD1,ATP11A,AXL,BCKDK,BCL11A,BCL2A1,BCL2L1,BCL2L2,BCL3,BID,BIRC2,BIRC3,BMP2,BOK,C3,CAPZA2,CARD10,CASP4,CASP8,CCNB1,CCNC,CCND1,CCNE2,CD82,CDC25A,CDC25B,CDC45,CDC6,CDH1,CDH13,CDH3,CDK2,CDKN2D,CEBPB,CEBPD,CFLAR,CITED4,CKS1B,COL2A1,COL3A1,CSF1,CSF2,CTNNA1,CTNNB1,CTSB,CTSF,CTSZ,CXCL1,CXCL11,CXCL12,CXCL2,CXCL3,CXCL8,CXCR4,CYP1B1,DUSP6,ENPP2,EOMES,ERAP1,ERAP2,ERBB2,ERO1A,F…	2192 (14)
levodopa		chemical - endogenous mammalian		0.948	1.86e-17	ABCA7,ABHD14B,ABI1,ADRA2C,AGFG2,AIFM2,ALPL,AMIGO2,ARAP1,ARC,AREL1,ARG2,ARHGEF19,ARMH4,ARPP19,ARRB2,ATP2A2,ATP2A3,AXL,BBC3,BCL2L1,BICC1,BTBD3,C18orf21,CACNA1H,CACNA2D3,CACNB2,CAP1,CAPG,CAPN10,CASK,CASKIN2,CASP3,CBR3,CCND1,CCNYL1,CD63,CDC42EP3,CHAC1,CHST11,CHST8,CIART,CITED4,CLIP4,CMTM8,CNIH3,COCH,COL4A1,CORO2B,COTL1,CRYM,CTNNBIP1,CTSB,CTSC,CTSZ,CXCL12,CYLD,DAAM1,DAB1,DBP,DCAKD,DDIT4L,DGAT2,DIXDC1,…	1989 (19)
Vegf		group	Inhibited	-3.071	2.91e-17	ABCB1,ADAM10,ADAM15,ADGRG1,ADGRL2,AGFG2,AHR,ALOX5AP,ANGEL1,ANGPTL4,ANP32A,APLN,ARHGAP18,ARHGAP23,ARHGEF17,AURKA,AXIN2,BCL2A1,BIRC5,BMP2,BMP2K,BMP7,BNC1,BTBD3,CALM1 (includes others),CASP1,CASP3,CASP8,CCDC15,CCN1,CCNE2,CCNF,CD46,CDC14A,CDC25A,CDC25B,CDC45,CDC6,CDH1,CDH5,CDK1,CDK2,CDKN3,CELSR1,CENPF,CFLAR,CKS1B,CLCF1,CLDN1,CNTFR,CRY1,CSF2,CTNNB1,CXCL1,CXCL11,CXCL12,CXCL8,CXCR4,CYYR1,DCBLD2,DLL4,DNA…	2065 (17)
HNF4A	1.88	transcription regulator		0.219	3.04e-17	AASS,ABCB10,ABCC3,ABCF3,ABHD6,ABT1,ACBD6,ACLY,ACO2,ACOT1,ACOX1,ACSL1,ACSS3,ACTN1,ACTR3,ACVR1,ADAT1,ADCY7,ADGRB1,ADIPOR1,ADPRH,ADRB2,AGA,AGTPBP1,AHNAK,AHSA1,AIP,AJUBA,AK2,AKR1B1,AKR1C3,ALCAM,ALDH5A1,ANKRA2,AP2A1,APIP,APP,AQP3,ARFGEF1,ARFIP2,ARG2,ARHGAP11A,ARHGEF19,ARL4C,ARMC1,ARMC8,ARPC5,ASAH1,ATF4,ATG4C,ATP6V1D,ATP6V1H,ATP7B,AVPI1,AXIN2,BAD,BAG4,BCAR1,BCL2L1,BCLAF1,BDH1,BLOC1S6,BLZF1,BMI1,BMP2K,B…	2769 (20)
SMARCA4	0.628	transcription regulator	Inhibited	-4.879	3.68e-17	ABCA1,ABCB1,ABHD2,ABLIM3,ABRACL,ACSL5,ACTN4,ADAM15,ADGRG1,AGMAT,AHNAK,AHR,ALDH1A3,ANTXR2,ANXA10,AP1S2,AP3M2,AREG,ARHGDIB,ARL4C,ATP2A1,AXIN2,BAK1,BAMBI,BCL2A1,BEX5,BIN1,BIRC5,BMP4,C6orf141,CARD16,CASP1,CASP3,CCDC169,CCDC9B,CCN2,CCND1,CCNE2,CD19,CD47,CD63,CDC25A,CDC6,CDH1,CDK2,CDKN1B,CDKN2B,CDKN2D,CEBPB,CHEK2,CLCF1,CLDND1,CNP,CNTN1,COL1A1,COL7A1,COTL1,CPM,CPS1,CRYBG1,CSF1,CSNK1G2,CTSB,CTSH,CTSS,CUL…	2527 (20)
tretinoin		chemical - endogenous mammalian	Inhibited	-6.391	9.75e-17	ABCA1,ABHD2,ABI1,ABLIM1,ACACB,ACOX1,ACSL1,ADA,ADAM10,ADAM11,ADCYAP1R1,ADGRE2,ADM,AFF2,AGTR1,AHNAK,AHR,AKT1,ALDH1A2,ALDH1A3,ALDH9A1,ALPL,ANGPTL4,ANXA1,ANXA2,ANXA6,AP1S2,APCDD1,APLN,APP,AREG,ARHGAP1,ARHGAP29,ARHGEF1,ATF4,ATOH8,ATP2A2,ATP2A3,ATR,AURKA,BAMBI,BCL2A1,BCL2L1,BCL3,BHLHE40,BID,BIRC2,BIRC3,BIRC5,BLZF1,BMP2,BMP4,BMP6,BMPR2,BTC,C1S,C3,CA8,CACNA1C,CALCB,CALM1 (includes others),CALR,CAMK4,CAMK…	2052 (15)
PGR	5.627	ligand-dependent nuclear receptor	Inhibited	-3.354	1.17e-16	ACOX1,ACP5,ACSL1,ADARB1,AHCYL1,AK3,AKR1C3,ALDH1A3,AREG,ARNT,ATP1B1,BCL2L1,BIRC2,BIRC3,CALCB,CALD1,CAPN2,CCN5,CCNB1,CCNB2,CCND1,CCND3,CD59,CDC42BPA,CDC6,CDH12,CDK1,CDKN1B,CEBPB,CEBPD,CKAP4,CLDN7,COL6A1,COL6A2,CPT2,CSRP1,CTBS,CTDSPL,CTSD,CXCL8,DSCAM,DST,EDN1,EFNA3,EGFR,ELL2,ENC1,EPAS1,EPHA1,ERBB2,ESRRA,EZR,F2RL1,F3,FKBP5,FLOT2,FN1,FOXC1,FOXO1,GAL,GAS6,GPER1,GPRC5A,GRB10,GREB1,GRK4,HBEGF,HIF1A,HPCAL…	2274 (18)
IFNG		cytokine	Inhibited	-9.179	2.64e-16	ABCA1,ABCB1,ABCC1,ABCD3,ABI1,ABLIM3,ACLY,ACSS1,ACTB,ADAM17,ADAMTS9,ADCY7,ADGRG1,ADGRG2,ADM,AGRN,AGTR1,AHR,AIF1L,ALDH1A3,ALDH7A1,ALOX5AP,ALPL,ANAPC5,ANGPTL4,APOL6,APP,ARAP2,ARC,AREG,ARG2,ARNT2,ARPP19,ATF4,ATG13,ATG5,ATP1B1,ATP2A2,AUTS2,B2M,BAK1,BATF2,BBC3,BCL2A1,BCL2L1,BCL2L2,BCL3,BDNF,BID,BIRC2,BIRC3,BMP6,BRCA2,BRIP1,BST2,BTN3A1,BTN3A2,BUD23,C1R,C3,CALHM6,CAMK4,CAPN1,CARD6,CASP1,CASP10,CASP3,CASP…	1714 (13)
SNAI1	-1.235	transcription regulator		1.341	2.64e-16	ACTN1,ACTR3,ADD2,AFAP1,ANKRD1,AXL,BAK1,BCL2L1,BMP4,CCN1,CCN2,CCND1,CCND3,CD46,CDC25B,CDH1,CDH2,CDH4,CDH5,CDK2,CFL1,CGN,CLDN1,CLDN12,CLDN4,CLDN7,COL1A1,COL2A1,CTTN,CUX1,CXCL8,DKK1,DPYSL3,ELF4,EPCAM,ERCC1,ESPN,ESRP1,FLNA,FLNB,FLNC,FN1,FOSL1,FOXC2,FST,GDF15,GLI1,GLI2,GSN,ID1,ID4,ITGA2,ITGB1,KRT18,KRT8,LASP1,LEF1,LIF,LIMA1,MLXIPL,MMP14,MSI1,MYO5A,OCLN,OLIG1,OLIG2,PARVB,PEBP1,PFKP,POU5F1,PTEN,PTGS2,RA…	2405 (20)
POU5F1	-6.999	transcription regulator		0.269	3.07e-16	ACVR1,AHR,AKT1,APCDD1,ASH2L,AXIN1,BAD,BAG1,BAG3,BAG4,BAK1,BCL10,BCL2A1,BCL2L10,BCL2L2,BFAR,BID,BIK,BIRC2,BIRC3,BIRC5,BMI1,BMP4,BNIP2,CARD6,CASP1,CASP10,CASP3,CASP6,CASP7,CCND1,CCNF,CDH1,CDH2,CDX2,CHST15,CIDEB,CITED1,CLDN7,COBLL1,CRABP2,CTNNB1,CYP26A1,DAPK1,DFFA,DLX1,DLX3,DLX4,DLX5,DNMT3B,DSP,DUSP1,DUSP4,DUSP5,ECSIT,EFEMP1,EN1,EOMES,EPCAM,EPHA2,ESRRB,ESX1,EVPL,EXT2,FARP1,FAS,FGF5,FOXA1,FOXD3,FOXE1…	2247 (21)
PRL	1.88	cytokine	Inhibited	-6.623	3.16e-16	ACTB,ACTR3,AKR1C3,ANXA2,ANXA3,APP,ARF3,ATP2A2,B2M,BAG1,BCL2L1,BOK,BST2,CAMK1,CAMK2N1,CAPN2,CAV1,CCNB1,CCND1,CCND3,CDH1,CEBPD,CMPK2,CNN3,COL1A1,COL3A1,COL5A1,CPD,CST3,CTSA,CTSB,CTSD,CTSH,CTSS,CTSV,CXCL11,DDX58,DDX60L,DHX58,DNAJA4,DTX3L,ECM1,EGFR,EGR1,EIF2AK2,ELOC,EPSTI1,ERBB2,ERBB3,ERBB4,FLT4,FN1,GNA12,GPSM1,HELZ2,HERC5,HERC6,HIPK3,HNRNPH2,HSD17B7,HSPD1,ID1,ID3,IDE,IER3,IFI35,IFI44,IFI44L,IFI6,IFI…	1833 (20)
fulvestrant		chemical drug		-0.569	7.66e-16	ADCY9,ADRB2,AREG,ASCC3,ATF4,ATP5F1B,AURKA,AXL,BAK1,BIK,BIRC5,BLM,BMP2,BMP4,BMPR2,C3,CALCB,CASP4,CAST,CAV1,CAV2,CCDC34,CCDC80,CCN1,CCN5,CCNB1,CCND1,CDC25A,CDC25B,CDH1,CDK1,CDK8,CDKN1B,CEBPD,CENPF,CHAF1A,CHTF18,CKS1B,CRYZ,CSF1,CTNNB1,CTSD,CXCL11,CXCL12,CYCS,E2F1,EGFR,EGR1,EPHA1,ERBB3,ESRRA,FGF9,FKBP1A,FLT1,FNTA,FOSL2,FOXM1,G6PD,GABPA,GADD45A,GAL,GHR,GREB1,GSTP1,GTSE1,GUCY1A1,GUCY1B1,H2AX,HOXC4,HSD1…	2291 (19)
cisplatin		chemical drug	Inhibited	-3.736	9.56e-16	ABCB10,ABCC3,ABCC4,ABHD4,ACADM,ACADVL,ACOX1,ACTB,ADRM1,AGFG2,AHNAK2,AIFM1,AKT1,ALDH1A3,ANGEL2,ANKRD1,ANXA1,ANXA2,ANXA4,AQP3,ARHGEF10L,ASRGL1,ASTN2,ATF4,BAG4,BAK1,BBC3,BCL2A1,BCL2L1,BCL2L10,BCL2L12,BCL2L13,BHLHE41,BIRC2,BIRC3,BIRC5,BMP4,C11orf96,CAPN1,CAPN2,CARD6,CASP1,CASP3,CASP6,CASP8,CAT,CAV1,CC2D1A,CCN2,CCNB1,CCND1,CCNG1,CD14,CDC14B,CDC25A,CDC25B,CDH1,CDK1,CDK5,CDKN1B,CDKN2B,CFLAR,CHEK1,CHEK2,…	2542 (18)
mir-8	-5.736	microRNA		1.436	1.99e-15	ABL2,ACTN1,ADAM12,AKT1,AMOTL2,ARHGAP5,ATG5,BBC3,BMI1,BMP2,CBL,CCND1,CCNE2,CD47,CDC25A,CDC25B,CDH1,CDH2,CDK6,CLDN1,CLDN12,CLDN23,CLDN7,CTNNB1,DDIT4L,DLX5,DNAJC3,E2F3,EGFR,EP300,EPCAM,ERRFI1,ETS1,FAT1,FHOD1,FN1,FOXF2,FTH1,GATA4,GEMIN2,GJB3,GNA13,GRB2,GRB7,GSE1,HIF1A,HMGB1,HMOX1,HOTAIR,HOXA5,IL1B,IL6,ITGAV,ITGB1,KCNK1,LATS1,LATS2,LEPR,LOX,LRP1,LSR,MAPK12,MET,MPRIP,MSLN,MSN,MYH10,MYOF,NIN,OCLN,PAK6,P…	2117 (21)
WNT3A	3.639	cytokine		0.15	2.12e-15	ACADL,ACADS,ACADVL,ADAM10,ADAMTS14,AHR,ALDH1A3,ALPL,APP,AQP3,ARHGAP18,ATP1B1,AXIN2,BCL9L,BDNF,BGN,BMP2,BMP4,CACNA1G,CALR,CAMK4,CAVIN4,CCDC80,CCN1,CCN2,CCN5,CCND1,CDH2,CEBPB,CEMIP2,CFD,CLEC11A,COL11A2,COL1A1,COL2A1,COLEC12,CPT1C,CPT2,CTH,CTNNB1,CXCL12,CYP24A1,DCLK1,DKK1,DNAJC6,DPAGT1,DVL2,EDN1,EFNB1,EN1,ENG,EOMES,EPAS1,EPHA5,ERBB3,ESRRB,ETV5,FCMR,FGF5,FHL2,FHOD3,FN1,FOXM1,FOXQ1,GAS1,GATA4,GDNF,GLI…	2383 (19)
PML	-1.282	transcription regulator	Inhibited	-3.25	5.08e-15	ACACB,ACADL,ACADM,ACADS,ACOX1,ACSL4,ACTG1,ANXA4,BIRC5,BST2,CACYBP,CAT,CCNA1,CCND1,CDH2,CDK2,CDKN2B,CFL1,CIAPIN1,CPT1A,CXCL1,CXCL11,CXCR4,DDX60,DNAJA4,DNAJB9,DNAJC9,EGFR,EPSTI1,FANCD2,FAS,FTL,GADD45A,GCLM,GPAM,HERC6,HMOX1,HSD17B7,HSPB1,IDI1,IFI27,IFI35,IFI44,IFI44L,IFIH1,IFIT1,IFIT3,IFITM1,IL1A,IL1B,IRF7,ISG15,ISG20,JUP,LDLR,LIPE,LPL,MAF,MAFF,MAP2K1,MAPK1,MCM6,ME1,MX1,NFE2L2,NQO1,NR3C1,NSFL1C,OAS1…	2146 (19)
EZH2	0.231	transcription regulator		-1.095	8.21e-15	ABL2,ACTB,ADAM10,ADRB2,ALOX5AP,ALPL,ANXA6,ARHGAP1,AXIN2,BIRC3,BMP1,BMP2,BMP4,BMP7,C15orf48,C3,CABLES2,CACNG4,CCND1,CCND3,CCNE2,CD63,CD82,CDH1,CDH2,CDK6,CDKN1B,CDKN2B,CDX2,CEMIP,CHRM3,CHRNB1,COL1A1,COL4A1,COL5A1,CPD,CSF2,CSNK1A1,CSTF2,CTNNA1,CTNNAL1,CTNNB1,CUL1,CXCL1,CXCL11,CXCL2,CXCL8,CXCR4,CYP1B1,DAB2IP,DENND2A,DKK1,DUSP5,E2F1,EFNA1,EGFR,EGR1,EOMES,EP300,EPAS1,EPDR1,EPHA1,EPM2AIP1,ERBB2,ERBB4,EZ…	2525 (24)
OGA	0.175	enzyme	Inhibited	-2.067	1.17e-14	ABLIM1,ABLIM3,ACADM,ACO2,ACSL4,ACSS1,ACTG1,ACTN4,ADAM19,ADAMTS17,ADAP1,ADGRG2,ADGRL2,ADRM1,AHNAK2,AIFM1,AIFM2,ALOX5AP,ARHGAP29,ARHGEF25,AVEN,BCL2L1,BCL2L13,BCOR,BNIP2,C1RL,CACNA2D3,CAPN1,CASP1,CAV1,CCBE1,CCND1,CD14,CD24,CD302,CD47,CD99L2,CDCA7,CDCA7L,CDH1,CDK2,CDK5,CDK6,CDKN2B,CEACAM1,CEBPB,CELSR1,CIAPIN1,CLDN1,CLDN12,CLDN7,CMTM8,CNOT3,CNTNAP3,COX6C,CREB5,CSF1R,CTNNB1,CXCL16,CXCL8,CYFIP2,DAGLB,DC…	2661 (23)
HGF	4.987	growth factor	Inhibited	-3.594	1.78e-14	ABCB4,ADGRG1,ADGRL2,AHR,AIFM1,AKT1,ANGPTL4,ANK3,ANP32A,ARPC5,AURKA,BCL2A1,BCL2L1,BIRC2,BIRC3,BIRC5,BMP2,BMP2K,BNC1,CA9,CALM1 (includes others),CASP1,CASP10,CASP8,CAV1,CCN1,CCN2,CCND1,CCNE2,CCNF,CCNG1,CD46,CDC14A,CDC25A,CDC25B,CDC45,CDC6,CDH1,CDK1,CDK2,CDKN1B,CDKN2B,CDKN3,CELSR1,CENPF,CFLAR,CKS1B,CLCF1,CNTFR,COL1A1,COL2A1,COL3A1,COL4A1,CRY1,CSF1,CSF2,CTNNB1,CXCL2,CXCL8,CXCR4,DTYMK,DUSP4,DUSP6,EDA,…	2088 (15)
estrogen receptor		group	Activated	3.09	2.36e-14	ABCA1,AKT2,AKT3,ANXA1,AXL,BDNF,BMP7,C3,CALCB,CALD1,CAPG,CAV1,CAV2,CCN2,CCNA1,CCND1,CCNE2,CD24,CD59,CD99,CDH1,CDH10,CDH12,CDH13,CDH3,CDH4,CDH5,CDH8,CLDN23,CLDN4,CNKSR1,COL12A1,COL13A1,COL4A1,COL4A2,COL4A5,COL4A6,COL5A1,COL6A1,COL6A2,COL7A1,COL9A2,CXCL1,CXCL12,CXCL8,CXCR4,DCHS1,DSC2,DSP,EDN1,EGFR,EGR1,ERBB2,ERBB3,ERBB4,ETS1,F11R,FGF13,FGF5,FGFR1,FGFR3,FGFR4,FLNC,FN1,GAL,GJB3,GREB1,HBEGF,HOTAIR,HOXC…	2589 (19)
APP	-1.19	other	Inhibited	-3.483	4.73e-14	ABCA1,ABCA7,ABCD3,ACO2,ACTB,ACTG1,ACTN2,ADAM10,ADAM19,ADAP1,AIFM1,AKT1,AMPH,ANXA6,APBB1,APLP2,APP,ARC,ARF6,ATF4,ATP1B1,ATP5F1B,ATP5F1C,ATP5F1D,ATP5PF,AXIN1,AXIN2,AXL,BACE2,BAD,BASP1,BBC3,BCL2L1,BCL2L2,BDNF,BIK,BIN1,BMP4,BMP6,BRD2,BRPF1,C1QBP,C1R,C1S,C3,CALR,CANX,CAP1,CAPN1,CASP3,CAST,CAT,CCDC25,CCN2,CCND1,CD59,CD82,CDC14A,CDH1,CDH2,CDH3,CDH5,CDK1,CDK2,CDK5,CDK6,CFL1,CFLAR,CHRNA7,CKB,CKMT1A/CKMT1B…	2481 (19)
methylselenic acid		chemical reagent		1.996	5.56e-14	ABCC4,ACP3,ACTN4,AKT1,AKT2,ATAD2,ATF5,ATP11A,AURKA,B4GALT1,BCL2A1,BCL2L1,BIRC2,BIRC3,BIRC5,BMP4,BRCA2,CADM1,CAMK2N1,CAMK4,CCNB1,CCNB2,CCND1,CDC14B,CDC25A,CDC25B,CDC6,CDC7,CDK1,CDK2,CDK5,CDKN2D,CENPA,CENPF,CFLAR,CHAF1A,CHEK2,CREB1,DHFR,DNAJB9,DNAJC3,DTYMK,DUSP10,E2F1,E2F5,ELF3,ENPP5,ERCC1,ERP44,FKBP5,FN1,FOXA1,FOXM1,GADD45A,GATA2,GDF15,GUCY1A1,HOXD8,HSD17B11,HSP90B1,ID1,ID3,IGF1R,ING1,INPP4B,IRF1,…	2583 (20)
trans-hydroxytamoxifen		chemical drug		1.508	5.61e-14	ACTN4,ACVR1,ADCY9,ADGRA2,ADM,ALDH4A1,ANXA3,AREG,ARHGAP24,ARNT2,ASCC3,BAK1,BIK,BMP4,BRPF1,CAV1,CBX6,CCN5,CCNB1,CD24,COL1A1,COL4A5,CRYZ,CTSH,CXCL12,CXCL8,CYP1B1,DBN1,DUSP1,DUSP4,EFNA1,EGR1,ENC1,EPB41L3,ERBB2,ERBB3,FGF9,FMN2,FN1,FZD8,GNE,GNS,GPRC5A,GREB1,GSTP1,HIF1A,HOXC4,IER3,IGFBP4,IL1R1,INPP5J,INSIG2,IRF6,ITGA2,KLF6,KRT81,KYNU,LAMB1,LHFPL2,LITAF,LMNA,LOX,LOXL2,LOXL3,MAPT,MATN2,MMD,MMP2,MPPED2,MXD…	1970 (12)
NR3C1	-1.958	ligand-dependent nuclear receptor		1.418	5.97e-14	ABCA1,ABHD2,ABI1,ACTB,ACTN1,ACTN2,ADM,AKT1,AKT2,AKTIP,ALOX5AP,AMIGO2,ANGPTL4,ANXA1,APP,ARID4B,ARPC2,ARRB1,ARRB2,ATP1B1,B2M,BAG1,BAG3,BAG4,BCL10,BCL2L1,BCL2L2,BCOR,BDNF,BHLHE40,BIN1,BIRC2,BIRC3,BMP2,BOK,BRD2,C1QTNF2,C1R,CACNA2D3,CAPN2,CARD10,CARD14,CARD6,CASP10,CASP4,CASP6,CASP7,CAT,CAV1,CBX4,CCN1,CCND1,CD47,CDC42EP3,CEBPB,CKAP2,CKS1B,CLCF1,CLK2,COQ8A,CORO1C,CORO2A,CPEB4,CPS1,CRABP2,CSF2,CTNNBL1,C…	2406 (13)
FOXO3	0.099	transcription regulator		-1.103	8e-14	ACLY,ACVR1,AHR,ANXA1,ANXA3,APLN,AURKA,BBC3,BCL10,BCL2L13,BIRC5,BMP2,BNIP2,BPGM,CARD16,CASP4,CASP8,CAT,CAV1,CCN1,CCN2,CCNA1,CCNB1,CCNB2,CCND1,CCND3,CCNE2,CDC42EP3,CDC45,CDC6,CDCA8,CDH1,CDH5,CDKN1B,CDKN2B,CDKN3,CDT1,CEP55,CERS4,CFLAR,CHCHD4,CLDN1,COL4A1,COL4A2,CPT1A,CSNK2A2,CTSB,CTSV,CXCL8,CXCR4,DLGAP5,EGR1,EIF4EBP1,ELOVL7,ENPEP,EXO1,FABP5,FBXO32,FBXO5,FLNB,FLT4,FN1,FOXC1,FOXM1,FOXO1,FOXO4,FYN,GADD…	2494 (23)
Lh		complex	Inhibited	-2.264	9.51e-14	ACP3,ACP5,ACTB,ACTN1,ADCY7,ADCY9,ADGRG1,ALPL,AMH,AREG,ARHGAP1,ARHGAP35,ARL4C,ARPC1A,ATP2A2,ATP2B1,ATP5IF1,AXL,BAD,BAG1,BDNF,BTC,CAMK2G,CARD10,CASP4,CDC42EP4,CDK5,CFLAR,COL18A1,CREB1,CREBL2,CSNK1A1,CTNNB1,CTNND1,CXCL8,CXCR4,CYFIP2,DAPK1,DHCR7,DHRS3,DUSP1,DUSP14,DUSP9,DYRK3,EGFR,EZR,FKBP5,FLNC,FST,GBP1,GK,GNB1,GPRC5B,GRK5,HAS2,HK2,HSD17B1,IL6,ITGA3,ITGB5,ITPR1,KRT18,MAP2K1,MAP3K7,MAP4K4,MAPK14,MAPK…	1897 (17)
TAZ	0.447	enzyme		-0.45	1e-13	ADRB2,AHNAK2,AMOTL2,AMPH,ANKRD1,ANXA1,AOX1,ARHGAP29,ARNT2,AXL,BASP1,BDNF,CAMK2N1,CAV1,CAV2,CCN1,CCN2,CDH2,COL1A1,COL5A1,CYP1B1,DUSP1,EDN1,EGLN1,ENPP2,F2RL1,FLT1,FN1,GBE1,H2AX,HIF1A,HMOX1,IFI16,IRS1,KIT,KLF6,KRT34,LDLR,LOX,LOXL2,LRP2,LUM,MET,MYOF,NAV3,NOS2,PCLO,PGM1,PKM,PLK2,PMAIP1,PPP1R3B,PRSS23,PTGS2,RGS4,RUNX2,SAMD4A,SEMA3C,SERPINB7,SLC2A1,SNAPC1,SORBS2,TAGLN,TBC1D2,TFPI2,TGFB1,UGDH,UPP1,VEGFA,…	1201 (14)
IFNL1	-3.829	cytokine	Inhibited	-7.656	1.45e-13	APOL6,BST2,CHAC1,CMPK2,CXCL11,CXCL8,DDX58,DDX60,DDX60L,EIF2AK2,GBP1,HERC5,HERC6,HLA-B,HLA-C,IFI27,IFI35,IFI44,IFI44L,IFI6,IFIH1,IFIT1,IFIT2,IFIT3,IFIT5,IFITM1,IFITM2,IFITM3,IL6,IRF9,ISG15,ISG20,LAMP3,LGALS3BP,MLKL,MX1,OAS1,OAS2,OAS3,OASL,PHF11,PLAAT4,PLSCR1,PML,PSMB9,RSAD2,RTP4,SAMD9,SHFL,SLC15A3,SP100,SP110,STAT1,STAT2,TDRD7,TLR2,TMEM140,TRIM14,TRIM22,UBE2L6,XAF1,ZC3HAV1	1743 (13)
SBDS	-0.72	other			1.57e-13	ADD2,AKNA,AKR1C3,BEX1,CCN2,CEP57,CHAC1,COL14A1,CRMP1,CRYM,CTH,DERL3,DPYD,EGR1,EPDR1,ERBB3,FBXO32,GABBR2,GABRE,GADD45B,GSTT2/GSTT2B,HOXA11-AS,HOXA13,HOXB6,HOXC10,HSPA5,ID1,IFI16,IGFBP7,IL4R,KIF1A,LGR5,MAFB,MAFF,MAOA,MSX2,MT2A,MYD88,MYEF2,NEFM,NTS,OPN3,OTX2,P2RX5,PAK3,PCDH7,PLAGL1,PPP1R1A,PPP2R2C,PTBP2,PTBP3,PUDP,RAC1,RAC2,RBP7,RGS4,SNAI2,SORCS1,SPP1,TNC,TRIB3,XCL1,ZNRF1	574 (5)
PTEN	-0.718	phosphatase		0.27	1.69e-13	ABCC4,ABHD4,ACO2,ACOX1,ACSL1,ADM,AGPAT4,AKAP1,AKR1C3,AKT1,ALOX5AP,ANXA1,ARHGAP10,ARHGAP5,ARHGDIA,ASPH,ATP5MC1,AURKA,BACE2,BBC3,BCL3,BDKRB1,BEX1,BIRC5,BMP1,BPGM,BRIP1,BRPF1,C3,CA8,CAMK2B,CASP7,CBX4,CCNB1,CCNB2,CCNC,CCND1,CCND3,CD274,CDC25A,CDH1,CDH2,CDH5,CDK6,CDKN1B,CDKN2B,CDKN2D,CEBPB,CELSR1,CFD,CHEK1,CHML,CKS1B,CLDN1,CLDN12,CLDN23,CLTC,CNN3,COX5A,CRCP,CSNK1E,CSRP1,CSTF3,CTDSPL,CTNNB1,CTNNBL1,CTS…	2263 (16)
calcitriol		chemical drug		-1.335	2.37e-13	AAAS,ABCB1,ABCC3,ABLIM1,ACADSB,ACSL1,ADAM19,ADCY9,AHR,AKT1,ALDH1A2,ALDH4A1,ALPL,ANKRD2,ANLN,ANXA2,APP,AREG,ATG5,ATP10D,ATP2B1,ATP5F1D,BAK1,BCL2L1,BCL3,BIRC2,BIRC5,BMP7,BNIP2,C15orf48,C3,CA11,CACNA1C,CALCB,CASP7,CAVIN1,CCN1,CCNA1,CCNB1,CCNC,CCND1,CCND3,CD14,CDC45,CDC6,CDCA8,CDH1,CDK1,CDKN1B,CDT1,CEBPB,CEBPD,CENPA,CENPM,CFD,CHAF1A,CHAF1B,CHTF18,COL4A1,COL4A2,COX17,CPT1A,CSF1,CSF1R,CSF2,CXCL1,CXCL12…	2879 (20)
SOX2	10.41	transcription regulator		0.54	2.56e-13	ABCC3,ACVR1,AFAP1L2,AHR,AMOT,APCDD1,ASCL2,AXIN1,AXIN2,BCL2L1,BCL9L,BHLHE40,BIRC5,BMI1,BMP4,CASKIN2,CCN2,CCN5,CCND1,CD9,CDH1,CDH2,CDKN1B,CDX2,CEMIP2,CHRD,CHST15,CHST3,CITED1,CLDN11,CLDN7,CNKSR3,CNP,COBLL1,COL11A2,COL1A1,CRABP2,CSF1R,CSPP1,CTNNAL1,CTNNB1,CXCR4,CYP26A1,DKK1,DKK3,DLX1,DLX2,DLX3,DLX4,DLX5,DNMT3B,DSP,DUSP1,DUSP4,DUSP5,ECSIT,EFEMP1,EFS,EGFR,ELF1,ELF3,ELOVL1,EMX2,EN1,EOMES,EPCAM,EPHA2,ES…	2441 (23)
CG		complex	Inhibited	-4.04	4.28e-13	ABCB1,ACP3,ACSL1,ACTB,ADCYAP1R1,ADM,AKR1C3,APCDD1,APLN,AREG,ARNT,B2M,BCL2L1,BDNF,BHLHE40,BLM,BMP2,BTC,BTG3,C3orf80,CAMK4,CCDC86,CCND3,CCNE2,CDC6,CDH1,CDH2,CDKN1B,CEBPB,CEBPD,CEP170,CLDN11,CNPY4,CTSV,CXCL3,CXCL8,CXCR4,CYP26A1,DHCR7,DMD,DNAH11,DTL,DUSP1,DUSP6,EFEMP1,EFNB2,EGR1,ELAVL2,ELK3,EMB,EMP1,ENPP2,EPAS1,EPHA3,EPHA7,F2RL1,FABP5,FAM110C,FAS,FGF9,FHL1,FOSL2,FST,FYN,FZD4,G0S2,GAL,GAS1,GASK1B,GATA…	2696 (19)
ESR2	2	ligand-dependent nuclear receptor		-1.197	7.39e-13	A4GALT,ABCA1,ABLIM1,AK7,AKAP1,ANXA4,AP4M1,AQP3,ARL4A,ARNT2,ATF5,ATP2B1,BAG1,BAMBI,BBC3,BCL2L1,BID,BIN1,BIRC5,BMP2,BMP4,BMPR2,C3,C3orf80,CALCB,CAPN2,CAV1,CBS/CBSL,CCN2,CCN5,CCND1,CDC25A,CDC42BPA,CDH1,CDH13,CDH2,CDK6,CDKN1B,CEBPD,CEMIP2,CHST15,CHST2,CLDN1,CLDN11,CLDN4,CLIC5,COL13A1,COL16A1,COL1A1,COL7A1,CPM,CREBBP,CRIM1,CRYZ,CSF2,CTNNB1,CTSD,CXCL12,CXCL16,CXCL2,CXCL8,DDAH1,DDB2,DHCR7,DKK1,DMTN,DNAH…	2771 (19)
SP110	-4.579	transcription regulator	Activated	5.33	8.52e-13	AQP3,ARRB1,BCL2L12,BCL3,BMP4,BST2,CCN1,CDKN2B,CTSB,CXCL11,CYLD,DAB2IP,DLL4,DMD,DUSP10,E2F1,EEF2K,ERCC1,ETS1,F3,FER,FLII,FUS,GNA13,GRN,IFI27,IFI6,IFIH1,IFIT1,IFIT3,IFITM1,IFITM3,IKBKG,IL18,IL1R1,IL4R,ING1,IRF9,ITCH,ITGAV,ITGB1,LMNA,MAOA,MCL1,MX1,MYH9,NCK1,NF2,OAS1,OAS3,PANX1,PDCD6IP,PDGFC,PERP,PLK1,PLSCR1,POLE,PPARG,PRKCA,PTAFR,PTPN12,RAC1,RIPK2,RXRA,SERPINA1,SMAD2,SMARCA4,SMARCD3,SP3,SQSTM1,STAT1…
miR-30c-5p (and other miRNAs w/seed GUAAACA)		mature microRNA	Activated	4.544	9.09e-13	ACVR1,ADAMTS14,ADAMTS15,ADAMTS2,AP2A1,ATP2A2,BDNF,CBFB,CCN2,COL1A1,COL4A1,COL4A2,COL4A5,COL5A1,COL8A1,CPNE8,DOCK7,FRG1,GALNT1,GALNT7,GNAI2,GPD2,HNRNPM,IFRD1,IL6,IRS2,ITGA2,JUN,LAMC1,LMNB2,LOXL2,MAFA,MAP4K4,MBNL1,MET,MLLT1,MLLT11,MYO10,NAPG,NCEH1,NID1,NID2,NT5E,NUFIP2,P3H1,P4HA2,PAFAH1B2,PDGFA,PDGFB,PGM1,PLEC,PLOD2,POGLUT3,PPARG,PPP3CA,PPP3R1,PTGFRN,PTPA,PTPRK,RAB27B,RAD23B,RBMS1,RUNX2,SEC23A,SEC6…	1678 (7)
SP1	0.019	transcription regulator	Inhibited	-3.653	9.39e-13	ABCA1,ABCB1,ABCC8,ABHD2,ACSL1,ACSS1,ADA,AFAP1L1,AGTR1,ALMS1,ALPL,ATP2A2,ATP2A3,ATP5F1B,B4GALT5,BACE2,BBC3,BDNF,BIRC5,BMP4,BMP7,C1QBP,CASP3,CAT,CAV1,CBS/CBSL,CCN2,CCND1,CCND3,CD59,CD99,CDC25B,CDC42BPG,CDH1,CDH2,CDK1,CDK2,CDK6,CDKN1B,CDKN2B,CDKN2D,CEACAM1,CEBPB,CEBPD,CGB3 (includes others),CHRNA5,CKB,COL1A1,COL2A1,COL7A1,COL8A1,CRABP2,CSNK2A1,CTH,CTSD,CXCL12,CXCL3,CXCL8,CXCR4,CYC1,CYP1B1,CYP26A1,DH…	2482 (21)
Z-LLL-CHO		chemical - protease inhibitor		-1.802	1.03e-12	ACTB,AHR,AK2,AKR1B1,AKT1,APP,ARHGDIB,ARNT,ATF4,AURKA,BAD,BCAR1,BCL2L1,BIRC3,BIRC5,BST2,CAT,CCN2,CCND1,CCND3,CCNG1,CDH1,CDKN1B,CDT1,CDX2,CEBPB,CFL1,CFLAR,CLDN4,CLIC1,CTNNB1,CTSB,CXCL2,CXCL8,CYP27B1,DDB2,DDR2,DHFR,DMD,DOK1,DUSP1,DUSP8,EIF4EBP1,ELAVL1,EP300,EPAS1,ETS1,ETV5,FAS,FGF2,FKBP4,FOXM1,FOXO1,G0S2,GLI1,GNAI1,GSTP1,HAS2,HDAC1,HIF1A,HMOX1,HNRNPA2B1,HSF2,HSP90B1,HSPA4,HSPA5,HSPA8,HSPB1,HSPD1,HTT…	2195 (16)
oblimersen		biologic drug	Inhibited	-4.832	1.11e-12	ADM,ATG13,BCL2L1,BRD2,BST2,CEBPD,CXCL8,DUSP1,EFNB2,FLAD1,GADD45A,GADD45B,IFI16,IFI27,IFI35,IFI44,IFI6,IFIT1,IFIT3,IFITM1,IFRD1,IL24,IRF7,ISG15,KLF10,KRT34,MAFF,MSX1,MX1,MX2,MYH3,N4BP1,OAS1,OAS2,OASL,PCF11,PRKCA,RNF114,RSAD2,SIX1,SNAPC1,STAT1,SULT1A2,TRIM14
EGFR	-4.201	kinase		-1.723	1.31e-12	ABI1,ACTB,AHCTF1,AKT1,ANXA1,AREG,ASCL2,ATAD3A,AXIN2,BCL2L1,BCL7C,BIRC5,BTC,C12orf49,CAPZA2,CASP3,CASP4,CAV1,CBX5,CCN2,CCND1,CD47,CDH1,CDK1,CDK2,CDK6,CDKN1B,CEBPB,CHKA,COL1A1,COL3A1,COL6A1,COL6A2,COL8A1,CRMP1,CSF2,CST3,CTNNB1,CUL1,CXCL12,CXCL8,CXCR4,DSC2,DSG2,DUSP1,DUSP4,E2F1,E2F2,E2F3,EFNB2,EGFR,EGR1,EIF6,ENOPH1,EPHA2,ERBB2,ERBB3,ERBB4,ETV4,EXOSC5,F2RL1,F3,FBLN2,FBN1,FOSL1,FOSL2,GADD45A,GBP1,GHR,…	2638 (17)
FN1	-3.122	enzyme	Inhibited	-3.915	1.4e-12	ACP5,ACTN4,ADD1,APLP2,APP,BCL7B,BIRC3,BIRC5,BSDC1,CANX,CAPN2,CASP7,CCN1,CCN2,CCND1,CCNI,CCT4,CD8A,CDH1,CDH2,CDK6,CDKN1B,CEBPB,COL1A1,CSF2,CSNK2A1,CTSD,CXCL1,CXCL2,CXCL3,CXCL8,DLGAP4,DPF2,EGFR,EIF4B,F3,FERMT2,FGF2,FLNA,FN1,GJB3,HK1,HLA-B,IGF2BP3,IL1B,IL1R1,IL6,IL7,IRS1,ITGA1,ITGA4,ITGA5,ITGAV,ITGB1,KCNH2,KIF21B,LAMP1,LGALS8,LIMS1,LIN7C,MAP3K7,MAPK8,MARCKS,MAX,MMP14,MMP2,NFKBIA,NOS2,PDGFB,PLAU,PLAU…	953 (13)
CDK19	-0.022	kinase		0.93	1.9e-12	ABHD4,ANKRA2,BAIAP2,BAK1,CCNG1,CD81,CD82,CTSD,CXCL1,CXCL2,CXCL8,CYFIP2,DCXR,DDB2,DHCR7,DRAM1,EPHA2,FAS,FBXW7,FDFT1,GADD45A,HBEGF,HMOX1,HSPA4L,IER5,IL1A,IP6K2,JAG2,JUN,LIF,LSS,MVK,MXD1,MXD4,NINJ1,NOL8,NOTCH1,OSGIN1,PDGFA,PHLDA3,PLK2,PLK3,RAP2B,RB1,RPL36,RPS12,RRP8,RXRA,SAT1,SDC1,SEC61A1,SLC7A11,SPHK1,STOM,TCN2,TGFA,TGFB1,TRAF4,TRIB3,TSC22D1,TSPYL2,TXNIP,UPP1,VDR,ZFP36L1,ZMAT3	1316 (7)
CLOCK	-1.765	transcription regulator		-0.177	2.37e-12	ABCB10,ACOX1,ACSL4,ACVR2B,AHNAK2,AKT3,ANGPTL4,ANKRD12,APP,ARHGEF28,ARNT2,BHLHE40,BPHL,C1QBP,CALD1,CBFB,CCN2,CCND1,CEMIP,CEP20,CHRNA7,CHST3,CLIP1,CLOCK,CPD,CRISPLD1,CYP26A1,DBP,DHTKD1,DNAJB9,DTX4,DUSP8,E4F1,EEF2K,EGFR,ESYT1,FKBP5,FZD6,GADD45A,GADD45B,GCC2,GCK,GDNF,GLIPR1,GNAO1,GNPTAB,GSKIP,HACD2,HAS2,HES6,HIPK3,HMG20A,HSF2,HSPH1,ICAM1,ID1,IGFBP5,IKBKE,INTS14,JAM3,JUNB,KANK2,KCND3,KCNS1,KCTD1,KIAA0…	1339 (13)
TERT	1.601	enzyme		-0.174	2.87e-12	AFAP1L1,ALDH1A3,ASAP1,B2M,BIRC5,BMI1,CALD1,CALU,CAV1,CCN2,CCND1,CD24,CHEK1,CTSC,CXCL8,DUSP6,EFEMP1,EGFR,EIF5A2,ELK3,ETS1,FGF2,FRMD6,GATA6,GNA13,GSN,HDHD5,HLA-B,HMGB1,HOXB6,HTRA1,ICAM1,IFI16,IFIT1,IFIT2,IGFBP4,IL13RA1,IL1B,IL6,IQGAP2,ISG15,ITGAV,JUP,KDM5C,KHDRBS1,LIPG,MMP14,MMP2,MTHFD1L,MX1,NFKBIA,NOP58,NSFL1C,NUCKS1,PALM2AKAP2,PARP1,PAX6,PCDHGC3,PDGFC,PLOD2,PLTP,POU5F1,PRSS23,PTGS1,PTGS2,PXN,RASA…	2174 (20)
FAS	-3.089	transmembrane receptor		-0.187	2.99e-12	AIFM1,AKAP9,AKT2,ANXA2,ARAP2,ARHGDIA,ARHGEF1,ARL4A,ARRB2,BAD,BCL11A,BCL2A1,BCL2L1,BGN,BID,BIRC2,BIRC3,BIRC5,BTG3,BTN3A3,CABIN1,CAMK2B,CAMK2G,CASP3,CASP8,CAST,CCN2,CD59,CDIPT,CDKN1B,CEBPD,CFLAR,CLASP1,CLTB,COL18A1,COL1A1,COL3A1,COL4A1,COL4A2,COL5A1,COL6A1,COL8A1,CREB1,CRYBG1,CSF1,CSNK1G2,CTNND1,CXCL1,CXCL11,CXCL2,CXCL3,CXCL8,CYTH2,DUSP10,DYRK3,EFNA1,EGR1,ERCC1,F2RL1,F3,FAS,FBN1,FLOT2,FLT1,FOXO1,GB…	1605 (10)
PDGF BB		complex	Inhibited	-4.464	3.31e-12	ADARB1,ADM,ADRB2,ANXA11,AREG,ARG2,ATP2A2,ATP2B1,BCL3,BDKRB1,BDKRB2,BHLHE40,BMP3,BMP4,BMP6,C3,CALD1,CALM1 (includes others),CASP4,CAV2,CBX4,CCN1,CCN2,CCND1,CCND3,CCNL1,CDK1,CDK2,CDKN1B,CEBPB,CEBPD,COL18A1,COL3A1,CREB1,CSF1,CSF1R,CSF2,CTH,CXCL2,CXCL8,CYCS,DBNDD1,DCBLD2,DGAT1,DUSP1,DUSP5,DUSP6,EDN1,EGFR,EGR1,ELAVL1,ELOVL2,ENPP1,ETS1,ETS2,F3,FBLN5,FGF2,FGFR1,FHL1,FHL2,FLNA,FLT1,FN1,FOSL1,FOXC2,FXYD5,…	2214 (18)
doxorubicin		chemical drug	Inhibited	-3.907	3.42e-12	ABCA3,ABCA7,ABCB1,ABCB4,ABCC1,ABCC3,ADAM10,ADM,AKT1,ANXA1,ANXA2,APP,AREG,ATP2A2,AURKA,BAD,BAK1,BBC3,BCAP31,BCL2A1,BCL2L1,BCL2L2,BHLHE40,BIK,BIRC2,BIRC3,BIRC5,BMP4,BRCA2,CASP1,CASP3,CASP8,CAT,CCN1,CCN2,CCNB1,CCNB2,CCND1,CD14,CD274,CD47,CDC25B,CDK1,CDK2,CDKN3,CENPA,CFLAR,CHEK1,CHEK2,CKAP4,CLDN4,COL3A1,CTSB,CTSD,CXCL1,CXCL2,CXCL8,DPAGT1,DPYSL4,DRAM1,DUSP1,DUSP5,E2F1,E2F2,E2F3,EDN1,EFEMP2,EGFR,EGR1,E…	2287 (18)
PD98059		chemical - kinase inhibitor	Activated	4.932	4.58e-12	ABCA1,ACTR3,ADIPOR1,AGTR1,ALOX5AP,ANKRD1,ANXA1,AP2B1,APOBEC3B,AREG,ARPP19,ARRB1,ATF4,ATP2A1,BATF2,BBC3,BCL2L1,BDH1,BDNF,BGN,BIRC5,BMP2,C3,CASP3,CAV1,CCK,CCN2,CCN5,CCNB1,CCND1,CCNE2,CD14,CDC25A,CDH1,CDH2,CDH3,CDK2,CDKN1B,CDKN2B,CDX2,CEBPB,CEBPD,CFLAR,CHN1,COL1A1,COL3A1,COL4A1,CREB1,CSF2,CSTF1,CTNNB1,CTSB,CTSH,CXCL1,CXCL2,CXCL3,CXCL8,CXCR4,CYCS,CYP1B1,CYP24A1,DCBLD2,DENND2B,DHRS3,DUSP1,DUSP4,DUSP5,…	2134 (16)
CCND1	-1.772	transcription regulator		-1.777	4.59e-12	ABCC4,AFAP1,AHI1,AHNAK,ALDH1A3,AQP3,AREG,ARMCX1,ASAP2,ATAD2,ATP6V0E1,AURKA,BCLAF1,BIRC5,BRIP1,C11orf58,CALU,CCNA1,CCND1,CCND3,CCNE2,CD6,CDC45,CDC6,CDCA7,CDCA7L,CDCA8,CDH1,CDK2,CDK6,CDKN1B,CDKN2B,CENPF,CENPK,CENPN,CEP55,CLPB,COL1A1,CTNNBIP1,DEPDC1,DTL,DYNC1LI1,E2F1,E2F7,EGFR,EIF5A2,ELAVL1,ELOVL7,ENDOD1,ENPP2,EPGN,EPHA2,EPS8,ERBB2,ERBIN,ERRFI1,FAM120A,FAM83D,FGFR1,FLNA,FOXM1,FZD7,GAS2L3,GATA4,GPALP…	2033 (19)
MIR17HG	2.459	other		0.648	4.85e-12	ALPL,APCDD1,APP,BMP4,BMPR2,CCM2,CCND1,CD274,CELSR1,CLIC1,COL5A1,CREB1,CSNK1G1,CXCR5,CYLD,DAB2IP,DCHS1,ECE1,ECSIT,EFNA2,FBN2,FNDC3B,FOXB1,FRAS1,FZD2,FZD3,FZD4,GDF11,GLG1,GPC3,HEG1,HIF1A,HIF1AN,HNF1B,HOXA5,HOXA6,HOXB5,HSPG2,IL6ST,IL7R,ITCH,JAG1,KIT,LAMA5,LRP1,LTBP1,MAN2A1,MDFI,MEGF8,NCOR2,NOTCH2,P3H1,PITX2,PKD1,PTEN,PTPRK,RECK,REST,RGMA,RNF11,RNF111,SEL1L,SEMA3E,SORT1,TAGLN,TAX1BP1,TBX20,TBX3,TGFBR…
CD3		complex	Inhibited	-3.226	7.06e-12	AARS1,ACADS,ACP3,ACTN4,ACTR3,AHCYL1,AHR,ANXA1,APBA1,AQP3,ARHGDIB,ATF4,ATP11B,ATP5F1C,BAMBI,BCL2A1,BCL2L1,BIRC3,BIRC5,BRK1,BST2,BZW1,C1R,CALM1 (includes others),CASP3,CASP6,CASP8,CBL,CCND1,CCND3,CD226,CD274,CD8A,CDC25A,CDK1,CDK2,CDK2AP1,CDK6,CDK7,CDKN1B,CEACAM1,CENPF,CFLAR,CHRNA5,CKS1B,CLIP1,CNIH4,COPB2,COX5A,COX6C,CSF2,CSTF2,CUL4A,CXCL8,CXCR4,CYC1,CYCS,DPYSL5,DUSP11,DUSP14,DUSP22,EDIL3,EEF1A2,EIF…	1467 (14)
ASPSCR1-TFE3		fusion gene/product	Inhibited	-4.341	8.07e-12	ABHD2,ADGRG1,APOL2,ASAH1,ATP6V0E1,ATP6V1D,AVPI1,BHLHE40,BHLHE41,BIN1,C12orf49,CAST,CD59,CELF2,CTSA,CTSD,CTTN,DEXI,DST,ELOC,EPAS1,EPS15L1,EZR,G0S2,GDF15,GNS,GPRC5B,GRN,HLA-E,HMOX1,KCNJ4,LAMP1,MAFF,MET,MFSD1,MREG,MYOF,NPC2,OLFML2A,OSTM1,P4HA2,PACSIN2,PGAP6,PMP22,PPARGC1A,PXN,RAB32,RAB7A,RHBDF1,RRAGD,SCARB1,SCPEP1,SFXN3,SLC35F6,SLC9A1,SNCB,SOD2,STOM,STX3,TACC1,TACC2,TCN2,THEMIS2,UAP1L1,UPP1
MYCN	2.63	transcription regulator	Activated	5.648	1.25e-11	ABCA1,ABCA3,ABCA7,ABCB1,ABCB10,ABCB7,ABCC1,ABCC3,ABCC4,ABCD3,ABCD4,ABCF3,ABCG4,ACTB,ACTG1,ACTN4,AMOTL2,B2M,BASP1,BCL2L1,BID,BIRC5,BMI1,CAV1,CCN2,CCND1,CDH5,CDK7,CDKN1B,CHPF2,CKAP4,COL18A1,COL1A1,COL4A1,COL8A1,CRIM1,DKK3,DPYSL3,E2F1,E2F2,E2F5,EEF2,EGFR,EIF3C,FAU,FBN1,FGF5,FKBP9,FN1,FRMD6,GAPDH,GATA4,GATA6,GRB2,HDAC5,HK2,HLA-A,HMGA1,HSPD1,IGFBP7,ITGA2,ITGA3,ITGB1,JARID2,LGALS1,MAGT1,MAP4,MIR17HG,MM…	2572 (23)
metribolone		chemical reagent		0.416	1.51e-11	ABCC4,ACADSB,ACLY,ACP3,ACTN1,ACTN2,ADRM1,ADSL,AKNA,ALDH1A3,ALDH9A1,APP,ATP1B1,ATP5F1B,ATP5F1C,ATP5F1E,ATP5MC1,ATP5PB,ATP5PF,ATP6V0A2,ATP6V0E1,ATP6V0E2,ATP6V1C1,ATP6V1D,ATR,B2M,B4GALT1,BCL2L1,BPGM,BPNT1,BRIP1,C1orf116,CAMKK2,CAPN5,CAV2,CCNA1,CCND1,CDC6,CDKN1B,CDKN2B,CENPN,CFLAR,CHEK1,COX15,COX17,COX5A,COX6C,COX7B,CPT2,CRYZ,CXCR4,CYB561,CYC1,DELE1,DLD,DNAJB9,DPYSL4,EGR1,ELAPOR1,ELK4,ELL2,EP300,ERO1…	2349 (18)
forskolin		chemical toxicant	Inhibited	-2.538	1.52e-11	ABCA1,ACER2,ACOX1,ACP3,ACP5,ACTB,ACTN1,ADCY9,ADGRG1,ADGRL2,ADM,ADSL,AGTR1,AIP,ALPL,APP,AQP3,ARC,AREG,ARHGAP1,ARL4C,ARPC1A,ATP1B1,ATP6V1C1,AVPI1,AXIN2,B4GALT1,BAG1,BAG3,BAMBI,BCL3,BDNF,BHLHE40,BIRC5,CABIN1,CALM1 (includes others),CALR,CARD10,CASP4,CCK,CCN2,CCNB1,CCNB2,CCND1,CCND3,CD14,CD8A,CD9,CDC42SE1,CDH2,CDKN1B,CDKN2B,CDKN3,CEBPB,CEBPD,CERK,CGB3 (includes others),CGREF1,CITED4,CNP,COL18A1,COL1A…	2112 (20)
IFNA2	1.882	cytokine	Inhibited	-9.214	1.52e-11	ADAM17,ANXA1,APOL6,ATF5,B2M,BAG3,BIRC5,BST2,C1R,C1S,CAV1,CBFB,CD274,CDKN1B,CDKN2B,CEACAM1,CMPK2,CNP,CORO2A,CXCL11,DDX58,DDX60,DNAJB2,EFNB3,EGLN3,EIF2AK2,ENPP1,EPB41L3,FAS,FBXO8,FGF2,GBP1,GBP2,GBP4,HBEGF,HERC5,HERC6,HIF1A,HLA-A,HLA-B,HLA-C,HLA-E,HSH2D,IFI16,IFI27,IFI27L2,IFI35,IFI44,IFI44L,IFI6,IFIH1,IFIT1,IFIT2,IFIT3,IFIT5,IFITM1,IFITM2,IFITM3,IL12RB2,IL1B,IL6,IRF1,IRF5,IRF7,IRF9,ISG15,ISG20,LAMP…	1446 (17)
SYVN1	-0.057	transporter	Inhibited	-4.857	1.61e-11	ABCC3,ABCC4,ADAM9,ADCY9,AHR,AMOTL2,ANO10,APLP2,APP,AXL,BHLHE40,CALM1 (includes others),CAVIN1,CCND1,CD46,CDA,CEP164,CYB561,CYP1B1,DPYD,DUSP1,EMC7,EPHA2,ERCC6,EXT2,F3,FAS,GNB2,GPRC5A,HERC5,HLA-A,HLA-C,HNRNPM,HSPB1,IFI44,IFITM2,IGF1R,IL7R,ITGA3,ITGA6,ITGAV,ITGB1,KCNN4,LAPTM4A,LGALS3BP,MCAM,MGRN1,MYOF,NDFIP2,NFE2L2,NFKB2,OLR1,PFN1,PLD2,PLPP3,PNPLA2,POLR2B,PSMC3,PVR,RAB10,RAB34,RPL18,RPN2,SCARA3,SLC1…	2052 (11)
PDLIM2	-3.308	other		0.167	1.67e-11	ALX1,C4orf19,CCND1,CDH1,CEMIP,CLCN4,CSF2,CXCL8,DMRT3,DNAJC15,DPF3,ENPP2,F2RL1,FHDC1,FOXRED2,FXYD6,GHDC,GHR,GNG2,GSTM2,HACD4,HBEGF,IFI44,IFIT3,IGFBP3,IL7,KIT,KYNU,LGALS3BP,MECOM,MME,MPZL2,MYL9,NAP1L2,NR2F1,NUDT11,OAS3,OBSL1,PCSK1N,PDLIM2,PHLDA1,PHLDA3,PPP1R14A,PRR16,PRUNE2,RASGEF1A,RNF128,RTN1,RTN2,SCARA3,SH3GL2,SLC10A4,SLC40A1,SLC43A3,SPOCD1,SRGAP1,STAT1,STC2,TAGLN,TNS1,TXNIP,WWOX,ZNF300	1518 (14)
HIF1A	-1.725	transcription regulator	Inhibited	-3.023	1.68e-11	ABCB1,ABCC8,ADAM10,ADAM15,ADAM17,ADM,AKT1,ALOX5AP,ANGPTL4,ANKRD37,APLN,ARPC2,ATP2A2,ATP5PF,AURKA,AXIN2,AXL,BCL2L1,BGN,BHLHE40,BHLHE41,BID,BIRC2,BIRC5,BMP2,CA9,CABIN1,CARS1,CAV1,CCN1,CCN2,CCND1,CD164,CD24,CD274,CDH1,CDH2,CDKN1B,CEMIP,CHKA,CHKB-DT,CLDN1,CSF1,CTSD,CXCL12,CXCL2,CXCL3,CXCL8,CXCR4,CYP2S1,CYP4F3,DLL4,DNASE1,E2F3,EDN1,EGFR,EGLN1,EGLN3,ENG,EPAS1,ERBB2,ERBB4,ERO1A,ESRRG,ETS1,FAM13A,FHL1,FH…	1955 (14)
tributyrin		chemical drug	Inhibited	-5.516	1.98e-11	ADM,ADRB2,ATP2A3,BCL2A1,BIRC3,C1orf116,CASP3,CCN1,CCN2,CD274,CD46,CLDN1,CSGALNACT2,CXCL3,CXCL8,CXCR4,DAPP1,DUSP1,DUSP14,EDN1,ETS1,GBP1,HBEGF,HNRNPD,HSPA5,ID3,IL1B,IL24,IL6,KRT6B,MME,MYBL1,MYL12A,NFKB2,OCLN,OLR1,PDLIM5,PTGS2,RGS4,SAMD4A,SERPINB2,SLC30A1,SNAPC1,SOD2,STYK1,TNFAIP3,TUFT1,UGCG	1768 (13)
miR-1-3p (and other miRNAs w/seed GGAAUGU)		mature microRNA	Activated	2.532	3.06e-11	AGMAT,AGRN,ANKIB1,ANXA2,ARCN1,ARF3,ARHGAP29,ASH2L,ATP6V0A1,AXL,BDNF,BLCAP,BRI3BP,C12orf49,CAP1,CCSAP,CHST11,CLCN3,CNN3,CORO1C,CSRP1,CTSC,EGFR,EHMT2,EML4,EPB41L4B,FBLN2,FERMT2,G6PD,GCFC2,GNPDA2,GNPNAT1,GOLGA7,GPD2,H3-3A/H3-3B,HACD2,HACD3,HAND2,INPP5F,IP6K2,IQGAP3,KLHL42,LASP1,LIN7C,LRP1,LRRC8A,LZTFL1,MET,MMD,MOV10,MRC2,MTX1,MXD4,NETO2,NOTCH2,NRP1,OSBPL7,PDCD4,PDLIM7,PGM2,PICALM,PLEKHB2,POLA1,POLR2…
26s Proteasome		complex		1.911	3.17e-11	ADRM1,AHR,ARNT,ATF5,ATF7IP2,ATG5,ATG9B,ATP6V0E1,ATP6V1D,ATP6V1H,BAG3,BCL3,BIRC2,BIRC3,BMP2,BRCA2,CCNE2,CDC25A,CDC6,CDK1,CDKN1B,CENPE,CFLAR,CLCN7,CTSA,CTSB,CTSD,CTSF,CXCL2,CXCL8,DDX58,EGFR,EXO1,FOSL1,FOXO1,H2AX,HBEGF,HSBP1,HSPB8,ICAM1,IFI35,IL6,JUNB,KIF23,LAMP1,MDM4,MICA,MICB,NFKB1,NFKB2,NOTCH1,PKD1,POLA1,PPP2CA,PRKCA,PRKDC,PRNP,PSAP,PSMB3,PSMC2,PSMC4,PSMD2,PSMD6,PTEN,PTGS2,PTPA,RB1,RFC3,SKIL,SMAD…	1993 (17)
lipopolysaccharide		chemical drug	Inhibited	-11.834	3.78e-11	ABCA1,ABCB1,ABCB10,ABCB4,ABCC1,ABCC3,ABCC4,ACADM,ACLY,ACP5,ACSL1,ACTN4,ACVR1,ACVR2B,ADA,ADGRE2,ADM,ADRB2,AFF3,AGTR1,AHR,ALCAM,ALOX5AP,AMPD3,ANGPTL4,ANK2,ANKRD22,ANXA1,ANXA3,ANXA7,APOBEC3B,APOL6,APP,AQP3,ARC,AREG,ARG2,ARHGAP1,ARL4C,ARNT,ASAP1,ASCC3,ATF4,ATP2A2,ATP2B1,ATP5MC1,AXL,BAG3,BAMBI,BATF3,BCL10,BCL2A1,BCL2L1,BCL3,BDKRB1,BDNF,BGN,BID,BIRC2,BIRC3,BLZF1,BMP2,BMP4,C1R,C3,CALCB,CALM1 (includes o…	2613 (17)
MAPT	4.6	other		0.068	4.74e-11	AAK1,AARS1,ACLY,ACO2,ACTB,ACTG1,ACTN1,ADD1,ADD2,ALDH5A1,AMPH,ANXA6,AP2A1,APP,ARF1,ARF6,ATP1B1,ATP5F1B,ATP5F1C,ATP5F1D,ATP5PB,ATP5PF,ATR,BASP1,BCR,BDNF,BSN,C1QBP,C1R,C1S,C3,CAMK2G,CANX,CAP1,CAPN1,CAPN2,CASP3,CAST,CCDC25,CCNB1,CCND1,CCT7,CCT8,CDK5,CDKN1B,CFL1,CHRNA7,CKB,CKMT1A/CKMT1B,CLASP2,CLTB,CLTC,COX5A,CRYM,CTSD,CYCS,CYFIP2,DLD,DLG1,DNAJC5,DNAJC6,DPYSL3,DSTN,DYNC1LI1,DYNLL2,EEF2,EIF4A2,EIF5A2,E…	2232 (18)
CNOT7	0.453	transcription regulator	Activated	2.157	4.86e-11	B2M,BST2,C12orf75,CLDN1,CMPK2,CSTA,HERC6,IFI27,IFI35,IFI44L,IFI6,IFIT5,IFITM1,ISG15,LGALS3BP,OAS1,OAS2,OAS3,PARP12,PLSCR1,PPM1K,PSMB8,SLC7A11,SP110,STAT1,TAP1,TAP2,UBE2L6	635 (7)
5-fluorouracil		chemical drug	Inhibited	-4.76	5.53e-11	ABHD4,AHSA1,ANKRA2,ANXA2,ANXA4,ATF4,ATG5,ATP5F1B,ATP5F1C,ATP5PB,BAIAP2,BAK1,BBC3,BCL2L1,BIRC2,BIRC5,BTF3,CALU,CANX,CAPNS1,CASP3,CCNA1,CCND1,CCNG1,CCT3,CCT4,CD81,CD82,CDH1,CDK1,CDK2,CFLAR,COX6C,CSF1R,CSTF1,CTSD,CYCS,CYFIP2,DCXR,DDB2,DLL4,DRAM1,E2F1,EEF2,EGR1,EIF1,EIF2S2,EIF3C,EIF3G,ELOB,EPHA2,FAS,FBL,FBXW7,FDPS,FKBP1A,FOXF1,FOXO1,FXYD3,GADD45A,GAPDH,GARS1,GDF15,GSN,GTF2H2,HBEGF,HMOX1,HNRNPA1,HNRNP…	2188 (18)
TCF7L2	-0.435	transcription regulator	Inhibited	-4.007	5.75e-11	ACADL,ACSL1,ADD1,ADGRG1,ADIPOR2,ALDH1A2,ANKIB1,ANKRD13A,ANLN,ANXA1,AQP3,ARAP2,ASPH,ATP8B1,AXIN2,BIN1,BIRC5,BMP4,CAMK2N1,CAP1,CCN2,CCN5,CCND1,CCNYL1,CCP110,CD24,CDKN1B,CEMIP2,CHMP1B,CLDN11,CNP,CPD,CREB5,CSRP1,CTNNA1,CTNNAL1,DEGS1,DHRS7,DOCK9,DUSP15,EGFR,ELOVL1,ENPP2,ENPP4,EPAS1,EPCAM,EPHB1,ERBB3,ERBIN,EVI2B,FAM91A1,FBXO32,FBXO8,FKBP1A,FRMD4A,FTH1,GCLM,GLTP,GRAMD2B,GSN,GSS,HHIP,ID1,ID3,ID4,IL1RAP,I…	2401 (22)
KDM5B	0.22	transcription regulator		1.867	6.52e-11	ASF1A,AURKA,CAV1,CCN2,CCNA1,CCNB1,CCND1,CD2BP2,CDC14A,CDCA3,CDIPT,CDK1,CDKN1B,CLCF1,CLDN1,DLGAP5,DNAL4,E2F1,ECT2,EGR1,EHD1,ERBB2,ERBB3,FABP5,FBXO5,FHL1,FOXA1,FST,GADD45A,GAL,GATA4,GREB1,IARS2,IGFBP2,INSIG1,IPP,ISG15,ISL1,ITGB1BP1,JADE2,LGALS3BP,LIMCH1,MAPK8IP3,MCAM,MCM3,MIA3,MPC1,MT1E,MT1F,NCAPH,NDC80,NEFL,NKX2-5,NOL3,OSER1,PDE3B,PHF20,PIR,PLS3,POLB,PPOX,PRPS1,RECQL,REEP1,RNASET2,RNF40,SAT1,SCNN1…	2184 (18)
ERG	-2.722	transcription regulator		0.099	8.03e-11	ABCC4,ACTN1,ADD1,ADGRG1,ADRB2,ARFGEF2,ARHGAP17,ARHGAP20,ARHGAP24,ARHGAP28,ARHGAP31,ARHGEF6,AXIN2,BCR,BDKRB1,BIRC3,CD164,CD59,CDC42BPB,CDH1,CDH2,CDKN2D,CHRNB1,CHTOP,CLIP1,COL11A2,COLGALT1,CTNNB1,CUX2,CXCL1,CXCL8,CXCR4,CYFIP1,DAAM1,DBN1,DIAPH3,DNMBP,DSTN,ELMO1,EPB41L3,ETS1,EXT1,FHL1,FKBP5,FLNB,FLNC,FLT1,FMNL3,FYN,GMFB,GUCY1A1,GUCY1B1,HMGB1,HPCAL1,ICAM1,ICAM2,IGF1R,IKBKG,ITGA6,LAMA5,LEF1,MAGI1,MET,M…	1809 (15)
lactacystin		chemical - protease inhibitor	Inhibited	-2.699	8.6e-11	ACTB,ADRB2,AK2,AKR1B1,APP,ARHGDIB,ATP2A3,ATP6V0A1,BAD,BAG3,BAK1,BCAR1,BEX1,BIK,CBL,CCND1,CCND3,CD24,CD9,CDKN1B,CFL1,CFLAR,CLIC1,CTSD,CXCL8,CXCR4,CYP24A1,DUSP1,E2F1,ERBB2,FAS,FOSL1,FOXO1,FTL,FUS,GBA,GNAI1,GNAI2,GSTP1,HIF1A,HLA-A,HLA-B,HLA-C,HMOX1,HNRNPA2B1,HSP90B1,HSPA5,HSPB1,HSPB8,IFRD1,IGFBP5,IL12A,IL6,IRAK4,IRS1,IRS2,ITCH,ITPRID2,LDLR,MAP1B,MAPK6,MCM10,MMP11,MMP2,NCOA2,NCS1,NFE2L2,NFKBIA,NKX2-1…	2234 (17)
JUN	1.403	transcription regulator	Inhibited	-4.437	9.94e-11	ABCB1,ACP5,AKT1,AKT3,ALPP,ANKRD2,ANXA1,ANXA2,APP,ARNTL2,ARTN,AXL,BAK1,BBC3,BCL2A1,BCL3,BCL9,BDNF,BEX2,BIRC2,BIRC3,C3,CALM1 (includes others),CAPN2,CAPNS1,CASP4,CAV1,CCN1,CCN2,CCND1,CCND3,CD14,CD164,CD274,CDH1,CDK1,CDKN1B,CFD,CFLAR,COL1A1,COL24A1,CSF1,CSF1R,CSF2,CSTA,CXCL1,CXCL16,CXCL3,CXCL8,CYCS,CYGB,CYP1B1,DKK1,DUSP1,DUSP5,DUSP6,E2F7,EDN1,EEF2,EGFR,EHD4,EPAS1,ERBB2,ERCC1,ERCC4,EZR,F3,FAS,FBLN5,F…	2319 (16)
IL15	-3.448	cytokine	Inhibited	-3.218	1.05e-10	ACADS,ACTN4,AHR,AKT1,AKT2,ANXA1,APBA1,AQP3,ARHGDIB,ARNT,ATF4,BAMBI,BBC3,BCL2L1,BPGM,BRK1,CALM1 (includes others),CAMK2G,CASP3,CCN2,CCND1,CCND3,CD226,CD274,CD46,CD59,CD8A,CDH1,CDK2AP1,CDK6,CDKN1B,CDKN2B,CEACAM1,CEBPB,CHRNA7,CKS1B,COPB2,COX6C,CPT1A,CREBBP,CSF1,CSF2,CXCL12,CXCL2,CXCL8,CXCR4,DARS2,DPYSL5,DUSP11,DUSP14,DUSP5,EDN1,EGLN1,ELK3,ELOC,EOMES,EPHB1,ERBB2,ETS1,EXOSC8,FAM160B1,FAS,FKBP1A,FYN,G6…	1981 (14)
lenalidomide		chemical drug	Inhibited	-3.812	1.09e-10	ACTG1,ADAT3,ANOS1,AUTS2,BCL11B,BCL9L,BEST3,BID,BTBD7,CAPN1,CARD16,CASP1,CAV1,CAV2,CCND1,CD226,CEBPB,CEMIP2,COX11,CRBN,CSNK1A1,CTNNB1,CTTNBP2,DFFA,DHTKD1,DKK1,DLD,DOCK4,DTNA,DVL3,EIF3M,ELF3,FCHO2,FLNA,FN1,FZD10,FZD2,FZD4,FZD5,FZD7,GAS6-DT,GINS4,GLUD1,GNPNAT1,GPR68,HILPDA,HS3ST3B1,HSPA5,IFI27,IFI6,IFIH1,IFIT3,IFIT5,IGF2BP3,IGSF11,INAFM2,ITPR1,KIF16B,LEF1,LHFPL2,LIMA1,LPL,LRP1,MAML2,MAN1C1,MGLL,MICA…	2320 (17)
let-7a-5p (and other miRNAs w/seed GAGGUAG)		mature microRNA		1.487	1.27e-10	ADAMTS14,ADAMTS15,ADAMTS2,ADGRG1,ATP6V0A1,ATXN7L3,BCL2L1,BCL7A,BDNF,BIRC5,BMP2K,CAPG,CASP3,CCND1,CDC25A,CDH2,CDIPT,CDK6,CDK7,CEMIP2,CHMP2A,CIAO2A,COL1A1,COL24A1,COL3A1,COL4A1,COL4A2,COL4A5,COL5A1,COL8A1,COMMD9,DHX57,DOCK5,DSP,DUSP23,FANCD2,FNDC3A,GEMIN7,GTPBP3,HMGA1,HMOX1,HYOU1,IFIT5,IFRD1,IGF2BP1,IGF2BP2,IGF2BP3,ITGA1,ITGA4,KRAS,LAMC1,LOXL2,MARS2,MED28,MLLT1,NEDD4,NF2,NID1,NID2,NXN,P3H1,PDGFA,PD…	914 (7)
progesterone		chemical - endogenous mammalian		-0.881	1.27e-10	ABCB1,ABCB4,ACOX1,ACP3,ACP5,ACSL1,ACTB,ADARB1,ADCYAP1R1,ADM,ADRB2,AGTR1,AK3,AKR1C3,ALDH1A2,ALPL,AMPD3,AREG,ARL4A,ATP1B1,ATP5MC2,AURKA,B3GALNT1,BCL2L1,BDNF,BHLHE40,BIRC3,BMP2,BMP2K,C3,CADM1,CALCB,CAPRIN2,CASP3,CAV1,CCN5,CCNB1,CCNB2,CCND1,CCND3,CCNG1,CD82,CDC25A,CDH1,CDH2,CDK2,CDKL2,CDKN1B,CDKN2B,CDT1,CEBPB,CEBPD,CFD,CHAF1A,CHAF1B,CHERP,CKMT1A/CKMT1B,CLDN4,CNDP2,CRCP,CSF1,CST3,CTDSPL,CTNNA1,CTSF,CT…	2394 (21)
filgrastim		biologic drug		1.032	1.54e-10	ACSL1,ACSL4,ADAM15,AGAP5 (includes others),ALDH6A1,ALPL,ANXA1,ANXA3,ARHGAP24,ARHGAP25,ARRB1,ASCL2,ATP11B,ATP13A3,ATP6V1C1,B2M,BCL2L1,BEX3,BIRC3,CARD6,CAST,CCNA1,CCNC,CCND3,CD177,CD46,CD59,CDC42EP3,CEACAM1,CEP57,CEP63,CHAF1A,CLEC7A,CPD,CRTC3,CRYBG1,CSF1R,CST3,CXCL1,CXCL8,CXCR4,CYB561,CYP1B1,CYSTM1,DACH1,DDAH2,DDHD1,DDX58,DEXI,DGKG,DPH5,DPYD,DPYSL3,E2F2,ELMO2,EPHB1,EPSTI1,ERLIN1,ETS2,EXT1,FABP5,FAM…
CD24	-6.245	other		-1.163	1.85e-10	ADRB2,APOBEC3B,ATP13A3,BCLAF1,BIK,CAV1,CHAC1,CTTN,CXCL8,DEPDC1,DEPDC1B,DLG1,DNAJC13,DUSP5,ECM1,FRYL,FXR1,GDF15,HOMER3,HSPB8,ICAM1,ISG20,JMJD1C,JUN,KIF18A,LAT2,LPP,LRPPRC,MBNL1,MCAM,N4BP3,NAGK,NCOA3,NRIP1,OASL,PDGFB,PDS5A,PHF10,PLAU,PLCB1,PRDX2,RAF1,RANBP2,RASA1,RBBP6,RELB,SFPQ,SLC30A1,SLC4A4,SMC4,SPG11,SPHK1,SYNE2,TFPI,TFPI2,TOP2A,TP53,TP53INP1,TPP2,TPR,TRIM8,TTC3,TUFT1,ULBP2,UROD,VDR,VPS13B,VPS1…	1995 (14)
CDKN1A	-2.937	kinase	Activated	2.239	1.96e-10	ACTB,ADAM10,ANLN,APP,ATAD2,ATR,AURKA,BBC3,BCL2L1,BIRC2,BIRC5,CAP1,CASP3,CCN1,CCN2,CCNB1,CCND1,CCND3,CDC25A,CDC25B,CDC6,CDK1,CDKN1B,CDKN2B,CDKN3,CENPF,CEP55,CHAF1B,CHEK1,CKS1B,COL4A1,COL4A2,COL5A1,CSF2,CTSB,CXCL2,CXCL3,DLGAP5,DPP3,DSE,DTL,DUSP1,E2F1,E2F2,E2F5,E2F7,ECSIT,EIF2S1,EOMES,EXO1,FAS,FN1,FOXM1,GADD45A,GMFB,GNAI1,GRN,GSTO1,H2AX,HIF1A,HJURP,HNRNPA2B1,HSPA1A/HSPA1B,HSPA5,IFITM3,IFNGR1,IL1B,IL…	2109 (20)
GLI1	4.889	transcription regulator	Inhibited	-2.057	2.3e-10	ACADVL,AKT1,ARC,ARPC5,BCL2A1,BCL2L1,BID,BNC1,C11orf96,CAV1,CCND1,CCSAP,CD24,CDC34,CDH1,CDK2,CEP70,CMPK2,CNIH4,COL1A1,COL2A1,CSF1,DEGS1,DKK1,DRG2,ELAVL2,EMB,EPB41L4B,EZR,FAS,FHL1,FOXC2,FOXM1,FUCA2,GALNT2,GATA4,GATA6,GLI1,GLI2,GOSR1,GPC3,GPER1,GREM2,HEY2,HHIP,HNRNPU,HOXA5,HPSE,IDS,IGFBP6,IGFBP7,IL6,INSIG1,IRS1,JAG2,JUP,LMNA,LZTS1,MAN1C1,MEF2C,MEST,MIA2,MLH1,MMP11,MMP2,MNX1,NAV3,NIPAL2,NKX2-8,NR2F2,…	2647 (23)
YAP1	-2.605	transcription regulator	Inhibited	-3.845	2.73e-10	ACLY,ACSL4,ACTG1,AKT1,AMOTL2,ANKRD1,ANLN,AREG,BCL2L1,BIRC5,BMP2,CASP3,CASP8,CCDC80,CCN1,CCN2,CCN5,CCNB1,CCND1,CCNF,CD274,CDC42EP3,CDC6,CDH1,CDK1,CDK2,CDK6,CDKN2B,CDX2,CPT1A,CPT2,CRIM1,CTNNB1,CXCL8,CYTOR,DDAH1,DIAPH3,DTYMK,E2F1,EDN1,EGFR,EGR1,FBXO32,FLNA,FN1,FOXM1,GADD45A,H2AX,ICAM1,ID1,IGF1R,IL1A,IL1B,IL6,ITGA5,KIF23,LATS2,LIFR,LINC00662,LMNA,LPL,MCM3,MCM6,MSLN,MYH3,MYH9,MYL9,NDUFS8,NEGR1,NF2,OCL…	2009 (18)
dihydrotestosterone		chemical - endogenous mammalian		-1.698	3.47e-10	ABCA1,ABCC4,ACADVL,ACLY,ACO2,ACP3,ACTB,ADIPOR2,ADM,ADTRP,AGTR1,ALDH1A3,AMH,APP,AREG,ASAP2,ATAD2,ATP2A1,ATP2A2,AXIN2,B2M,BASP1,BCAP31,BCAR1,BCL2L1,BCOR,BGN,BMPR2,BRIP1,C1orf116,CACYBP,CALCB,CAMKK2,CANX,CASP1,CASP3,CASP8,CCN2,CCNB1,CCND1,CCND3,CCNI,CCT3,CD63,CDC6,CDCA7,CDH1,CDH2,CDK2,CDKN1B,CIAO2A,COBLL1,COL3A1,COL4A1,COL6A1,CPT1A,CSNK2A1,CTNNB1,CYTH2,DCTPP1,DDX54,DEPDC1,DPM3,DTL,DYNC1LI2,EFNA1,EGF…	2879 (22)
paclitaxel		chemical drug		-0.313	3.64e-10	ABCB1,ABCB10,APC2,AREG,ATF4,BCL2L1,BHLHE40,BHLHE41,BIRC3,BIRC5,CACNB3,CASP10,CAV1,CCN2,CCND1,CCNG1,CD274,CD47,CDA,CDC42EP3,CDK18,CDK2,CFLAR,CHAF1B,CNP,CSF2,CTDP1,CXCL1,CXCL2,CXCL8,CYP1B1,CYP4F3,DCHS1,DDAH1,DUSP10,DUSP4,DUSP5,DUSP6,EGR1,EMP1,ENPP2,ENPP4,EPHA2,ETV5,FAS,FLNA,FOSL1,FOXM1,FOXO1,G0S2,GAD1,GADD45B,GAMT,GDF15,GFPT2,GRAMD1B,GRINA,H2AX,HBEGF,HIF1A,HLA-A,HPSE,ICAM1,IDUA,IER2,IER3,IGFBP3,IKB…	2302 (17)
FGF2	-1.667	growth factor	Inhibited	-3.824	3.73e-10	ACER2,ADGRL2,ADM,AGAP3,AKR1B1,AKT1,ANGPTL4,AQP3,ARC,AREG,ATF4,AXIN2,BAMBI,BBC3,BCL2L1,BDNF,BGN,BIRC5,BMP2,BMP4,CAPZA2,CAV1,CBFB,CCK,CCN1,CCND1,CCND3,CDC25A,CDH1,CDK2,CDKN1B,CDX2,CFLAR,CHRM3,CNP,COL1A1,COL3A1,CSF1,CTNNB1,CXCL12,CXCL2,CXCR4,CYGB,DKK1,DLL4,DUSP6,EFNB2,EGFR,EGLN3,EGR1,ENPP1,ENPP2,EPAS1,EPCAM,EPHA4,ERRFI1,ETS1,ETV4,ETV5,F3,FAS,FBN1,FGF2,FGFR1,FGFR3,FGFR4,FLNA,FLT1,FN1,FOSL1,FOXO1,FOXO…	2210 (15)
EGF	-0.764	growth factor	Inhibited	-6.554	5.25e-10	ABI1,ACOT2,ACSL4,ACTN1,ADA,ADAM17,AKT1,ALCAM,ANGPTL4,AQP3,ARC,AREG,ARF6,ARTN,ATP2A2,AURKA,B4GALT1,B4GALT5,BAK1,BBC3,BCL2L1,BIRC2,BIRC5,CASP1,CASP3,CAV1,CCN1,CCN2,CCNB1,CCND1,CCND3,CDC34,CDH1,CDH4,CDK1,CDK2,CDK5,CDKN1B,CDX2,CEBPB,CEBPD,CFLAR,CGB3 (includes others),CLCN3,CLDN7,COL1A1,COL3A1,CSF1R,CTSD,CXCL1,CXCL2,CXCL8,CXCR4,DUSP1,DUSP4,DUSP5,DUSP6,DVL2,E2F1,E2F3,EDN1,EFNB2,EGFR,EGR1,ELF3,ENAH,EOME…	2817 (19)
VHL	1.733	transcription regulator		1.404	5.45e-10	ADGRG1,AHCYL1,AKT1,ARPC1A,ATF4,AURKA,BBC3,BCL2L1,BHLHE40,CA9,CAV1,CCN2,CCND1,CDH1,CDH2,CDKN1B,CFL1,CLDN4,CLTC,CPT2,CXCL12,CXCR4,DECR1,E2F1,EGFR,EGLN3,EPAS1,F3,FILIP1L,FN1,FTH1,FTL,GBE1,GLO1,GNG4,H2AX,HIF1A,HMOX1,HNRNPA2B1,HSD17B1,IER3,IFITM3,IGF1R,INSIG2,ITGA5,JADE1,LMNA,LOX,LOXL2,MAF,MAVS,MIF,MMP14,MXI1,MYL12B,NOC2L,NREP,PDGFB,PFKFB3,PISD,PMAIP1,POLRMT,PTHLH,QPRT,RAP1B,RHOF,RPS6,RUNX1,SLC1A3,SLC…	2467 (21)
TCF4	3.69	transcription regulator	Activated	2.758	5.45e-10	ADA,ADAM17,ADAMTS9,ADAT2,AKT1,ALCAM,ALPP,ANGPTL4,ANXA6,ARHGEF6,AXIN2,B4GALT1,BCL2L13,BEX3,BHLHE40,BIRC5,BMP7,C15orf39,CADM1,CARS2,CASP1,CASP3,CASP4,CASP8,CCDC117,CCN5,CCNB2,CCND1,CD24,CD9,CDC25B,CDCA3,CDK1,CDK6,CDKN2B,CDKN3,CEP55,CKAP4,CLSTN2,CREB1,CRELD2,CTSE,DACH1,DCK,DDX58,DKK1,DNAJC12,DPF2,DSTN,ECEL1,EDN1,ELAPOR1,ELF1,ELF4,ENPP1,EPCAM,EYA1,FAM111A,FAM83A,FAS,FKBP7,FN1,FOXO1,GBP3,GEMIN5,GEMIN6…	2433 (20)
RRP1B	1.441	transcription regulator		-1.131	5.92e-10	ADCY7,ALDH5A1,ANAPC13,AREG,AURKA,BIRC5,BMP7,BRCA2,CASP3,CASP7,CCNB2,CCND1,CCND3,CCNG1,CDC6,CDK1,CDKN2D,CEBPB,CHEK1,CREBBP,CYP24A1,DHFR,DNAJC12,EIF3H,EIF4B,EP300,ESPL1,EXO1,FOXO1,FZD6,GADD45A,ITGB5,MCM3,MCM5,MCM6,MRAS,NCOA2,NLK,PDGFC,PERP,PLK1,POLD1,PRKCA,PRKCD,PRKD1,RARG,RBL1,RHOQ,RPA2,RPL11,RPL13,RPL14,RPL27,RPL39,RPL6,RPS14,RPS19,RPS3,RPS8,RPS9,RRP1B,SERPINE2,SPP1,TGFB1,TOP2A,VDR,VEGFC,ZNF426
CLDN7	-7.591	other		0.916	6.3e-10	ABLIM1,ANXA3,APLP2,ARHGDIB,ASAP1,ATP5MC1,B4GALNT1,C1S,C3,CBX2,CCN2,CCNA1,CKAP4,CLIP4,CXCL8,DENND5A,DKK1,DPM3,F3,FADS3,FOSL1,FOXQ1,FZD2,GRINA,HELZ2,HLA-B,IFI44,IFI6,IGFBP7,ITPR3,LAMTOR1,LGALS3,LGR4,LIMA1,LTA4H,LYSMD2,MAGED1,MCU,MMP2,MT2A,MX1,NCOA7,NETO2,NNMT,NTPCR,PHGDH,PKMYT1,PLAAT3,PLGRKT,PRNP,PRSS23,PRSS8,PSG9,PSMG2,RNASET2,RPL29,RPL34,RRAS2,RSL1D1,SCEL,SDCBP2,SERP1,SERPINB1,SERPINB7,SF3B6,SLC2…
miR-141-3p (and other miRNAs w/seed AACACUG)		mature microRNA		0.73	6.37e-10	BAP1,CACNA1G,CDH1,CDH2,CDK6,CDKN1B,CLOCK,CTBP2,CTNNB1,CYP1B1,DACH1,DLX5,E2F3,ELMO2,EPCAM,ERBIN,FOXF2,FOXJ3,GADD45A,GEMIN2,GJB3,GRB7,HMX1,IRF6,ISL1,ITGAV,ITGB1,JAG1,KCNK1,KLHL20,LEF1,LHX6,LSR,MMP2,MSLN,PERP,PITX2,PMAIP1,PTPRD,RAC1,RHPN2,RNF128,SATB1,SOX2,TBX1,TGFB2,TP73,VIM,YAP1,ZEB1,ZEB2	1828 (12)
U0126		chemical - kinase inhibitor	Activated	4.344	6.69e-10	ABCB1,ALPL,ANGPTL4,APC2,AQP3,ARC,AREG,ARG2,ATF4,AXIN2,BAD,BCL2L1,BDNF,BHLHE40,BIRC3,BIRC5,BMP6,C3,CA9,CACNB3,CAV1,CCN2,CCN5,CCND1,CCND3,CCNE2,CCNL1,CD274,CDC42EP3,CDH1,CDH5,CDK18,CDK2,CDKN1B,CEBPB,CEBPD,CFLAR,CHAF1B,CLCF1,CLDN4,COL1A1,COL2A1,COL4A1,CSF1R,CSF2,CTDP1,CTNNB1,CXCL1,CXCL11,CXCL12,CXCL2,CXCL3,CXCL8,CYP1B1,CYP24A1,CYP4F3,DBNDD1,DBP,DCHS1,DDAH1,DUSP1,DUSP10,DUSP4,DUSP5,DUSP6,EDN1,EEF2,EG…	1947 (13)
EDN1	-4.134	cytokine	Inhibited	-3.983	7.91e-10	ACTB,ADAM12,ADAM19,ANXA1,ANXA4,ANXA6,APLN,AREG,ARF6,ATP2A2,BCL2A1,CCN1,CCN2,CCND1,CDC25A,CDH1,CDH2,CDK1,CDKN1B,COL4A1,COL5A1,COL7A1,CST3,CTNNB1,CTNND1,CXCL8,CXCR4,EDN1,EGFR,EGR1,ENAH,ERRFI1,EZR,FGF2,FLT4,FN1,FOSL1,FST,GATA4,GRN,HAND1,HAND2,HBEGF,HCN2,HEY1,HIF1A,HSPA5,HSPA8,ICAM1,IL18,IL6,INSR,ITGA2,ITGA5,ITGAV,ITGB1,JUN,JUNB,LEPR,MAP2K1,MARCKSL1,MBP,MCAM,MITF,MMP2,MPRIP,MSN,MYL6,MYO9B,NFATC3,NOX5…	2969 (19)
topotecan		chemical drug		-0.576	9.84e-10	ACSL1,ARHGAP24,ARHGAP42,ASAP2,ASTN2,ATRNL1,AURKA,BCL3,C3,CACNA1C,CAMTA1,CCNB1,CDC25A,CDH8,CFLAR,CHD3,CSNK1G2,CSTF1,DCK,DUSP5,E2F3,EFNB1,EGR1,ENG,EPHA6,ERBB3,ERBB4,ESS2,EXOC6B,FAM3C,FAS,FAT1,FGFR3,FHIT,FUBP1,GDF15,GPC6,GRID1,GTF2H2,HIF1A,HLA-E,HMGXB4,HS3ST1,HSPA1A/HSPA1B,HSPA8,HSPD1,IRS1,ITGA2,JMJD1C,JUNB,KIAA0040,MAST1,MBNL2,MCL1,MDGA2,MED13L,MSH2,NBEA,NECTIN3,NFATC4,NINJ1,NLGN1,NOS2,NUP153,PARD3…	1897 (15)
BRCA1	0.115	transcription regulator		-0.931	1.06e-09	ACTB,ALDH1A3,AREG,ASCL2,ATRIP,BAK1,BCL2L1,BIRC5,BRCA2,CAMK2B,CARD10,CCNB1,CCNB2,CCND1,CCNG1,CDH3,CDKN1B,COL18A1,CTNNB1,CTSD,CTSF,CYP1B1,DDB2,DDX58,DGKA,E2F3,EGFR,EGR1,ELAVL1,ENPP2,ENSA,EP300,ERCC5,EXO1,EZR,FAS,FHIT,FHL2,FKBP5,FOXA1,FOXO1,FXYD3,GADD45A,GADD45B,GDF15,H2AX,H3-3A/H3-3B,HMOX1,HNRNPD,HSPB1,IFI27,IFI6,IFIT1,IFIT2,IFIT3,IFITM1,IGF1R,IRF7,KIT,LAMA3,LHX1,MLH1,MX1,NFE2L2,NOTCH1,NQO1,NR3C1,P…	2406 (19)
raloxifene		chemical drug		0.014	1.13e-09	ADCY9,ALDH4A1,ANXA3,AREG,ASCC3,BAK1,BCL3,BIK,BMP2,BMP4,CBX6,CCN5,CCNB1,CCND1,CD24,CSF1,CTSH,CXCL12,CYP1B1,DBN1,DUSP1,DUSP4,ENG,ENPP2,EPHA1,ERBB2,ERBB3,FLNB,GABPA,GNS,GPRC5A,GREB1,HMOX1,HOXC4,HSPA1A/HSPA1B,IDH2,IER3,IGFBP4,IL18,IL1R1,IL6,INPP5J,IRF6,ITGB1,JUN,KLF6,KRT81,KYNU,LAMB1,LDLR,LITAF,LUM,MAP3K11,MAPK14,MATN2,MIF,MKI67,MMD,MMP2,MPPED2,MXD4,MYBL1,MYO1B,NCOA3,PLK2,PLK3,PRPS1,PRSS23,PTGS2,PTTG…	2131 (15)
C11orf95-RELA		fusion gene/product	Inhibited	-5.333	1.19e-09	BCL2L1,BCL3,BIRC3,BMP2,BMP2K,CASP4,CSF1,CXCL2,CXCL3,FN1,FTH1,ICAM1,IL13RA1,IL15RA,IL4R,IL6,IRF1,IRF2,IRF7,LITAF,NFKB1,NFKB2,NFKBIA,NPY1R,PDGFB,PRKCD,PTGS2,RELB,SDC4,SMAD7,STAT5A,TAP1,TAPBP,TGM2,TNFAIP3,TNIP1
valproic acid		chemical drug	Activated	2.17	1.22e-09	AACS,ABHD5,ACSS1,ADCY1,ADRM1,AHI1,AKR1B1,AKR1C3,AMPD3,ANK3,ANTXR2,ATAD2,ATF4,ATP11A,ATP2A3,B4GALT1,BAG1,BCL2L1,BDNF,BIRC5,BSPRY,C1QTNF6,CACYBP,CALR,CARM1,CASP3,CASP8,CAT,CCN1,CCND1,CDC123,CDCA7,CDH1,CDKN1B,CDS2,CENPM,CHAF1B,CHEK1,CHKA,CHPT1,CITED4,CKS1B,COCH,CPT1A,CPT1C,CRAT,CREBBP,CROT,CTNNB1,CTSB,CXCR4,CYP1B1,CYP24A1,CYP2U1,DENND2B,DHCR7,DNAJB11,DNAJB9,DNAJC3,EDN1,EIF2S1,ELF1,ELOVL2,ELOVL3,ETV6…	2783 (18)
BRD4	0.262	kinase		-0.989	1.28e-09	ABCC4,ABLIM1,ACSL5,ADAT2,ANKRD37,BCL2L1,BCL3,BDH1,BHLHE40,BTN3A2,CCND1,CDC25A,CDC6,CDKN1B,CDKN2B,COL1A1,COL4A1,COL5A1,CXCL2,CXCR4,CXCR5,DCPS,DCTPP1,DERL3,ETV6,FBN1,FN1,FOSL2,GALNT14,GFI1,HMOX1,HOTAIR,HS1BP3,ICAM1,ICAM2,IL7R,INSM1,IRF1,IRF8,ITGA1,ITGA4,ITGA5,ITGB1,ITGB5,JARID2,KAT2A,KIF23,LCK,LIN28B,LOX,LOXL1,LOXL2,MAP4K1,MCL1,MCM3,MMACHC,MTHFD1L,MTMR2,MYD88,NQO1,PDGFA,PDGFB,PDGFC,PIM1,PIM2,PLAU,P…	2428 (22)
NKX2-3	7.354	transcription regulator	Activated	4.566	1.28e-09	ADAP1,ADM,AGAP3,AIF1L,ALPL,ANGPTL4,ANKRD37,ANLN,ARHGDIB,BATF2,BCHE,BMP2,BMP4,C1orf74,CASP1,CBS/CBSL,CCNB2,CDKN3,CEP55,CERK,CMPK2,CXCL16,CXCL8,DCLK1,DDX58,DDX60,DDX60L,DHX58,EDN1,EIF2AK2,EIF4B,F2RL1,FBN2,FBXO6,FGF2,GASK1B,GBP1,GBP2,GDF15,GET1,GHR,GNG12,HCP5,HELZ2,HES2,HEY1,HEY2,HFE,HLA-B,HLA-C,HOXD1,IL7R,KRT81,MAMDC2,MCMDC2,MFNG,MTURN,MYD88,MYO5A,NETO2,NR2F1,NT5DC2,PARP10,PARP12,PARP9,PAWR,PHGDH,P…
miR-16-5p (and other miRNAs w/seed AGCAGCA)		mature microRNA		1.92	1.31e-09	ANAPC16,ANLN,ARHGDIA,BCL2L2,BDNF,BMI1,CACNA2D1,CADM1,CAPRIN1,CCND1,CCND3,CCNF,CDC14A,CDC14B,CDC25A,CDK6,CDK7,CENPJ,CEP63,CHEK1,CHORDC1,CLDN12,CREBL2,DIPK1A,E2F3,EGFR,FGF2,FGFR1,FNDC3B,GALNT13,GALNT7,GFPT1,GNL3L,GOLGA5,GOLPH3L,GPAM,GRB10,GRB2,GRN,H3-3A/H3-3B,HERC6,HMGA1,HMOX1,HSP90B1,HSPA1A/HSPA1B,HYAL3,IFRD1,IGF1R,IL6,ITGA2,JUN,KCNN4,KIF23,KPNA3,LAMC1,LUZP1,LYPLA2,MAP2K1,MAPK3,MCL1,MLLT1,MLLT11,M…
E2F1	-0.495	transcription regulator		-1.148	1.4e-09	ABCB1,ACADL,ACSL5,ACTR3,ADIPOR2,ADK,AKT1,ALG5,ALPL,ATAD2,ATP5MC1,AURKA,BAD,BAK1,BBC3,BCL2L1,BID,BIRC5,BMI1,BMP4,BOK,CALD1,CALM1 (includes others),CALR,CASP3,CASP6,CASP7,CASP8,CAV1,CBX5,CCNB1,CCNB2,CCND1,CCND3,CCNE2,CCNF,CCT4,CD2AP,CD9,CDC25A,CDC25B,CDC45,CDC6,CDK1,CDK2,CDKN1B,CDKN2D,CFLAR,CHEK1,CHEK2,CKB,CLIC1,COL2A1,COX5A,CRABP2,CRIP2,CTNNB1,CTNNBIP1,CTSB,CYP27B1,DDAH2,DDB2,DHFR,DLEU1,DUSP1,DUSP…	1967 (18)
4-hydroxytamoxifen		chemical drug	Inhibited	-2.893	1.41e-09	ABCB1,AKAP1,AP4M1,AQP3,AREG,BCL2L1,BHLHE40,C3,CAPNS1,CCN1,CCN2,CCNA1,CCND1,CDCA7,CDH1,CDKN1B,CEBPB,CEBPD,CHST2,CLDN4,COL16A1,CTSD,CYP1B1,DECR1,DUSP1,DUSP4,DUSP5,DUSP9,EDN1,EFEMP1,EGFR,EGR1,EPHA1,ERRFI1,FGFR1,FOSL2,FOXA1,FOXM1,FOXO1,GABBR2,GLRX,GM2A,HOXD11,HSD17B7,IER2,IER3,IGF1R,IGFBP3,IL6,IL7R,ITPRIP,JUN,JUNB,MAP2K1,MAPK14,MICOS10-NBL1/NBL1,MKI67,MPC1,MT1F,MT2A,NCOA3,NCOR2,NFKBIA,OGT,PAK6,PDK4,P…	1968 (14)
TMPRSS2-ERG		fusion gene/product	Inhibited	-2.777	1.45e-09	AREG,ARHGAP28,B3GNT3,BBC3,BEX2,C15orf48,C16orf74,CARD6,CBX2,CCNB1,CDH1,CEBPB,CHAC1,COL5A1,CREB3L1,CSTA,CTH,CUL4B,DHRS3,DNAJA4,DPYD,DPYSL5,DUSP8,DYSF,ESRRA,FAM133A,FHOD3,FOXP2,FRY,GDF15,GNB4,GPRC5B,GSTP1,HOXC9,ID1,ID3,IFI44,IGF1R,IGFBP6,IL1A,KLF9,KRT23,LAMA3,LFNG,LONRF2,LOXL2,LPL,LTBP2,LURAP1L,MME,MSLN,OASL,OSBPL6,P2RY2,PHLDA1,PIM1,PLXNA2,PPARG,PRSS23,PSAT1,PSG9,RAB39B,RNF144B,ROBO3,ROR1,SAMD9,SAM…	1995 (12)
PAX3	10.753	transcription regulator		-1.112	1.48e-09	ANOS1,ANXA1,AP3M2,APP,ARC,ARHGDIB,ATN1,BCL2L1,BMP4,BST2,CAPN1,CDC6,CDH3,CGB3 (includes others),CHRNA5,CRY1,CST3,CSTF2,CTSA,CTTN,CXCR4,CYP1B1,DBN1,DLX2,DNM1,ECPAS,EIF2S1,EYA2,F2RL1,F3,FGF9,FHL1,FILIP1L,FKBP1A,FOXD3,FUBP1,G0S2,G6PD,GLDC,GUCY1A1,HNRNPA3,HSPG2,HTR6,ICAM2,ID3,ID4,IFITM2,IGFBP2,IL6,IL7R,IRS1,LBX1,LIPE,LNPEP,LY6K,M6PR,MCAM,MCC,MDFI,MEOX1,MEST,MET,MICB,MITF,MKNK1,MNX1,MSX2,NFKB2,NKX2-1,N…	1871 (12)
CSF2	-5.614	cytokine	Inhibited	-5.105	1.52e-09	ABCA1,ACP5,ADA,ADAM17,ADAM8,ADGRE5,ALOX5AP,ANLN,ANXA1,ARRB1,AURKA,BAD,BBC3,BCL2A1,BCL2L1,BCL3,BID,BIRC3,BIRC5,C3,CARD11,CARD16,CARD6,CASP1,CASP3,CCNB1,CCND1,CCND3,CCNF,CD14,CD207,CD24,CD63,CD8A,CDC123,CDCA3,CDCA8,CDH1,CDK1,CDKN1B,CDKN2B,CEACAM1,CENPE,CFH,CHAF1A,CHAF1B,CHST11,CHTF18,CKS1B,CLCF1,CLEC7A,COL8A1,CREB1,CSF1,CSF1R,CSF2,CSNK2A2,CTSC,CXCL1,CXCL2,CXCL3,CXCL8,CXCR4,DNAJC5,DUSP6,E2F7,EDN1,EF…	1704 (13)
butyric acid		chemical - endogenous mammalian		-0.285	1.97e-09	ABCB1,ADCY1,ADGRE5,ADGRG1,AFF1,ANXA1,ANXA2,ATP2A3,ATP5MC3,ATP7B,BAG1,BAK1,BCL2A1,BCL2L1,BIRC5,BMI1,CALCB,CALM1 (includes others),CAP1,CASP3,CBS/CBSL,CCK,CCNB1,CCNB2,CCNC,CCND1,CCNG1,CD81,CD82,CDC16,CDC25A,CDC6,CDH1,CDK1,CDK2,CDK5,CDK6,CDKN1B,CFLAR,CKS1B,CLCN3,CLDN1,COL4A1,COL4A2,COL5A1,CREBBP,CSF1,CSF2,CUL1,CXCL8,CXCR4,CYCS,DAPK1,DDR1,DNM1,DTYMK,DUSP1,E2F1,E2F5,ELK3,EP300,ESYT2,FOXM1,FPGS,FRMD6,F…	2462 (17)
F2	-3.984	peptidase	Inhibited	-6.373	1.98e-09	ADAMTS9,AKR1B1,ANGPTL4,B3GNT5,B4GALT1,BCL3,BIRC2,BIRC3,CALD1,CALR,CASP1,CASP3,CBR3,CCN1,CCN2,CCND1,CD63,CDC6,CDKN1B,CFLAR,CITED4,CKAP4,CLIC1,COL1A1,COL4A1,CORO1C,COTL1,CXCL1,CXCL3,CXCL8,CXCR4,DAAM1,DKK3,DST,DUSP1,E2F7,ECE1,EDN1,EGR1,EHD4,ELL2,EPB41,ETS1,F2RL1,F3,FGF2,FHL1,FLT1,FN1,FOSL1,FOSL2,GNA13,HAS2,HBEGF,HDAC9,HIF1A,HMGA1,HMOX1,HOXD10,HYAL3,ICAM1,IER2,IER3,IFRD2,IGF1R,IGFBP4,IGFBP5,IL15RA,IL…	2147 (15)
MITF	-1.242	transcription regulator		-1.704	2.09e-09	ACO2,ACP5,ACSL1,ALCAM,ALDH16A1,APOLD1,ASAH1,ATP6V1C1,BEST1,C1orf74,CCNB1,CCNF,CDC25B,CDCA3,CDCA8,CDK2,CDT1,CENPF,CENPM,CENPO,CEP55,CHAF1A,CHKA,CHTF18,CLCN7,COL1A1,COL2A1,CRYBG1,CXCL8,DAPK1,DIAPH1,DSN1,ECT2,EME1,ESPL1,ESRP1,FBXO32,FGD4,FN1,FOXD3,GLI1,GM2A,GNPTAB,GPM6B,GREB1,GYG2,HIF1A,INPP4B,ITGA3,ITGA4,ITPKB,KAZN,KCNN2,KIF20A,KIFC1,KIT,LGALS3,MBP,MCM5,MCM6,MDC1,MET,MICAL1,MITF,MMP14,NCAPD2,NCAPD3…	2153 (18)
2-(4-amino-1-isopropyl-1H-pyrazolo[3,4-d]pyrimidin-3-yl)-1H-indol-5-ol		chemical reagent		-1.581	2.36e-09	ACACB,ADGRL2,AHR,AKAP9,ANKRD1,ARHGEF4,ATP6V0E2,AURKA,BBC3,BBS4,BIRC5,BLM,BMP2,BRIP1,C1R,C1S,CCN2,CCNA1,CCNB1,CCND1,CCNE2,CCNF,CDC123,CDC23,CDC25A,CDC45,CDC6,CDH1,CDK2,CDK7,CFLAR,COQ8A,CPT1A,CUL5,CXCL8,CYP1B1,DEPTOR,DTL,E2F2,EDN1,EGR1,EXO1,FOSL1,FOXC1,GINS2,GMNN,GOLGA2,GREM2,H2AW,H2AX,HAS2,HAUS6,HBEGF,ID1,ID3,IFRD1,IL24,ITGA2,KIF14,KLC4,KLF5,KLF6,LIF,MCM10,MCM3,MCM5,MCM6,NABP1,NCAPG,NOTCH1,NR4A1,N…	2044 (17)
Interferon alpha		group	Inhibited	-8.126	2.4e-09	A4GALT,ADAM19,ANKRD10,APOBEC3B,APOL2,AQP3,AUTS2,AXL,B2M,BAK1,BBC3,BCL2A1,BCL2L1,BCL2L13,BCL3,BCR,BMP4,BST2,C3,CASP1,CASP3,CASP8,CCNA1,CCND1,CCND3,CD274,CD81,CD8A,CDC25A,CDH1,CDKN1B,CDKN2D,CEACAM1,CELSR1,CGAS,CHMP5,CLTCL1,CSF2,CTH,CXCL1,CXCL11,CXCL2,CXCL3,CXCL8,CYB561,DAXX,DDX58,DHX58,DRAP1,DUSP6,E2F1,EGFR,EIF1,EIF2AK2,EMID1,ENPP2,EPSTI1,F3,FAS,FBXO6,FOSL2,GBP1,GBP2,GBP3,GBP6,GLI1,GNA15,GPR180,HEL…	1458 (14)
NORAD	-1.868	other	Inhibited	-3.075	2.61e-09	BASP1,BHLHE40,CCN1,CCN2,CHST11,COL4A1,COL4A2,COL5A1,COL6A2,FSTL3,GADD45B,ID3,IGFBP3,IGFBP4,IL32,JUN,JUNB,NCOR2,PDGFA,PHLDB1,PPP1R13L,RHOA,RHOB,SDC1,SEC14L2,SGK1,SPOCK1,SSBP3,TAGLN,TNFRSF12A	947 (9)
mir-1		microRNA		1.564	3.04e-09	ADAM12,ADD1,ANXA2,ATP6V0A1,BDNF,CACNB2,CAP1,CAPRIN1,CASP3,CEBPB,CNN3,CREB1,CSF2,CXCL1,CXCL12,CXCL8,E2F5,EDN1,EIF4E3,EML4,FBXO32,FN1,GAS2L1,H3-3A/H3-3B,HACD3,HCN2,HNRNPA3,HNRNPU,HSP90B1,HSPD1,IGF1R,IL1B,JOSD1,KRAS,LASP1,MAN1C1,MCU,MET,MRTFA,MTX1,NUP50,PDCD4,PDGFA,PICALM,PPIB,PPP2R1B,RASA1,RNF138,RRBP1,SEC61A1,SERP1,SH3BGRL3,SLC25A1,SMARCA4,SNAI2,SOX9,STX6,SULF1,TAGLN2,TNS3,TWF1,UNC119B,UST,VEGFA,V…	958 (7)
D-glucose		chemical - endogenous mammalian	Inhibited	-3.316	3.11e-09	AARS1,ABCA1,ABCB1,ACADL,ACADM,ACLY,ACO2,ACOX1,ACSL1,ACSS1,ACTB,ACTN1,ADA,ADAM17,ADARB1,ADIPOR1,AGTR1,AKR1B1,ANLN,ANXA1,ANXA3,APLN,APP,ARF3,ATF4,ATF5,ATP2A2,ATP2A3,ATP2B1,ATP5MC2,ATP8B1,BAD,BBC3,BCL2L1,BMP2,BMP4,BVES,C3,CACNA1B,CACNA1C,CALD1,CALR,CANX,CAP1,CAPZA2,CARS1,CASP1,CASP3,CAT,CAV1,CBL,CBR3,CCN2,CCNB1,CCND1,CCND3,CCPG1,CD59,CDK1,CDKN1B,CDT1,CEBPB,CFLAR,CLGN,COL1A1,COL2A1,COL3A1,COL4A1,CPD,…	2542 (18)
ETV6-RUNX1		fusion gene/product	Activated	5.361	3.25e-09	ABLIM1,ABR,ADCY7,ADM,AHI1,ALOX5AP,ANTXR2,APOLD1,ARHGAP18,ARHGAP24,ARHGAP25,ARL4D,ARRB2,AURKA,BCL11A,BCL3,BID,BMP2,BSPRY,CAPZA2,CARD11,CARM1,CD164,CD19,CDC42EP3,CDH2,CDKN2D,CFL1,CLIC1,CLIP1,CYFIP2,DCHS1,DSTN,ELF4,ENG,EPHA7,FABP5,FERMT2,FGFR1,FTH1,GBP2,GNA15,GPSM3,GREB1,HCP5,HFE,ICAM1,IER3,IFI16,IFI35,IFI6,IFIH1,IFIT1,IFIT3,IFITM1,IL15,IL15RA,IL7,IRF1,IRF2,IRF3,IRF5,IRF7,IRF8,IRF9,ISG15,ISG20,ITGA4…	721 (7)
deferoxamine		chemical drug	Inhibited	-2.247	3.49e-09	ADGRG1,ADM,AK3,ANGPTL4,ANKRD22,ANXA2,APLN,APP,ARNT,BDNF,BHLHE40,CA9,CACNA1G,CACNB4,CCNB1,CCND1,CCND3,CD14,CD47,CD59,CDH1,CDK2,CFLAR,CTNNB1,CXCL8,CYP24A1,DUSP1,DUSP10,DUSP16,DUSP5,ECM1,EGFR,EGLN1,EGLN3,EPAS1,ESRRG,F3,FAM20C,FGF5,FLT1,GADD45A,GADD45B,GAS7,GDF15,GTPBP1,HIF1A,HK2,HMOX1,HSPA1A/HSPA1B,HTT,ICAM1,IFI16,IFI6,IFIT5,IGFBP2,IGFBP3,IGFBP4,IGFBP5,IL32,IL6,IREB2,ISG20,JAG2,JUN,KIT,LAMA3,LPL,LY7…	2049 (18)
WT1	9.107	transcription regulator	Inhibited	-2.797	3.76e-09	ACTN1,ADGRE5,AMH,ANXA11,APLP2,APRT,AREG,BAK1,BCL2A1,BCL2L1,CAPRIN1,CBS/CBSL,CCN2,CCND1,CD2AP,CD2BP2,CDC45,CDH1,CHAF1B,CLIC1,CMPK1,COL4A1,CSF1,CSF1R,CTNNB1,CTSV,CUL4A,CUL4B,DESI1,EFNA1,EGFR,EGR1,ELK4,EPS8,ERBB2,ETFA,ETS1,EXT2,EZR,FDFT1,FDPS,FGFR1,FIBP,GPC5,GRB10,GSN,GSR,HBEGF,HCFC1R1,HDLBP,HNRNPL,HSP90B1,HSPG2,IDI1,IFRD2,IGF1R,IL11,IL1B,IL1RAP,INSR,IRF8,ITGB1BP1,ITM2B,JUNB,JUP,KPNA1,KRAS,LGALS3,LM…	1954 (15)
VEGFA	-1.242	growth factor		-1.5	4e-09	ABCC1,ABHD5,ACADM,ACSL1,ADAM15,AKT1,ANP32A,ARG2,ATP5MC2,ATP5MC3,BCL2A1,BCL6B,BIRC5,BMP2,BMP4,CASP3,CAV1,CBFB,CCN1,CCN2,CCND1,CDH5,CDKN1B,CEACAM1,CLDN7,COL1A1,CREBBP,CSF2,CST3,CTNNB1,CTSB,CTSS,CTSV,CXCL12,CXCL2,CXCL8,CXCR4,DBT,DECR1,DENND2B,DLL4,DUSP4,DUSP5,E2F1,E2F2,E2F3,EDN1,EFNB2,EGR1,EOMES,EPHB4,ERAP1,ETFA,ETS1,ETS2,ETV4,ETV5,F3,FGF2,FGFR1,FLT1,FLT4,FN1,GART,GBP1,GRB10,HBEGF,HIF1A,HK1,HLX,HMOX…	1790 (16)
EP300	0.947	transcription regulator		-1.008	4.08e-09	ACACB,ACADL,ACADM,ADAM12,AHI1,ANXA6,AP3M2,ARHGAP24,ARHGEF10L,AXIN2,B2M,BANK1,BBC3,BCL2L1,BCLAF1,BDKRB2,BIRC5,CAMK2B,CAMK4,CAPG,CARD6,CBL,CCND1,CCND3,CD19,CD59,CDC25A,CDC42EP3,CDK2,CDKN1B,CDKN2B,CFLAR,CHKA,CHPT1,CKB,CLASP2,CLOCK,CNN3,COL2A1,CORO2B,CPT1A,CPT2,CRABP2,CRIM1,CTSE,CXCL2,CXCL8,CXCR4,DHFR,DHRS3,DUSP1,DUSP22,DUSP4,E2F1,EDN1,EGR1,EP300,EPHB2,EPN1,EPSTI1,ERBB2,EVL,EYA2,FN1,FNDC3B,FOSL2,FOXO…	2369 (18)
HNRNPA2B1	0.608	other		0.69	4.44e-09	ABCB1,ACSL5,ADGRG2,AKT3,ALX1,ANXA7,ARSJ,BCL2L1,CACNB2,CADM1,CD24,CDH1,CEMIP,CLDN1,CPS1,CPVL,CTSV,CUX1,DCLK1,DDR1,DSE,ELOVL2,ELOVL7,ERBB3,FHL1,FN1,FZD8,GDF15,GJC1,GPRC5B,GSN,HNMT,HNRNPA2B1,IDS,IGFBP2,IL6,ITPRID2,JUP,LEPR,LPAR1,MAST4,MEIS2,MEST,MMD,MOCOS,NOVA1,NR2F1,NR3C2,NRCAM,NTS,OAS1,PCSK9,PDGFC,PEG10,PHACTR2,PKM,PLOD2,PPARGC1A,ROR1,RYR1,SCN9A,SEMA3B,SERPINA1,SETBP1,SLC1A1,SLC2A4,SLC6A14,SNAI2,S…	1187 (11)
5-azacytidine		chemical drug	Inhibited	-2.579	4.85e-09	ABCB1,ANXA2,ATP5F1B,ATR,BBC3,BCL2L1,BRCA2,BTG3,CALR,CANX,CASP8,CAV1,CAVIN1,CDC25A,CDH1,CDKN2B,CLCF1,CLDN1,COL1A1,CTNNA1,CTNNB1,CXCL12,DKK1,DUSP1,EPHA2,ETV5,F3,FANCD2,FANCF,FOSL1,FYN,GADD45A,GDF15,GJB3,GSK3B,GSTP1,HBEGF,HK2,HSP90B1,HSPA5,HSPA8,HSPD1,IFI6,IRF7,IRF8,IRS2,KEAP1,KLF6,KRT81,LOX,MAFF,MCL1,MEF2D,MLH1,MUC4,MYO1B,N4BP2L2,NKX2-5,NOS2,PCDHA12,PLAGL1,PLAU,PNRC1,PPM1D,PRAME,PTGS2,PTPRG,RARB,RH…	2175 (19)
LMO2	3.574	transcription regulator		1.008	4.88e-09	ABCB10,ABL2,ACTB,ADAMTS9,ADGRG1,AHR,ANXA1,ARID3A,AXIN2,BBC3,BCL11A,BCL9,BMP7,BMPR2,CASP1,CASP3,CASP4,CAT,CCND3,CDH13,CDH5,CERS4,CGAS,CLDN4,COL18A1,CYFIP2,DAB2IP,DACT3,DDHD2,DHX58,DLX1,DUSP15,DUSP22,EFEMP2,EGLN3,ENG,ENTPD6,EPHB4,FGFR3,FLOT2,FNDC3B,FTH1,FZD5,FZD6,GALNT1,GDF11,GOLM1,GPRC5B,GRB10,GSDME,GSN,GTSE1,HHEX,HLX,HOXA5,HOXA7,HS1BP3,ICOSLG/LOC102723996,IFIH1,IGF2BP3,IL1RAP,INPP5B,IRAK1,IRS2,JA…	1395 (10)
Ige		complex	Inhibited	-6.048	6.66e-09	ACSL4,ACTN1,ADAM8,ADAMTSL4,ANXA1,AQP3,AREG,ARRB1,ATP2A2,BAIAP2,BCL2A1,BCL2L1,BCL3,BCR,BIRC5,C3,CAMK2G,CAPN2,CARD11,CAV1,CCND3,CDC42EP5,CEACAM1,CHST11,CHST8,CLCF1,CLEC7A,CMPK2,COBLL1,COL18A1,COQ7,CSF2,CXCL16,CXCL2,CXCL3,CXCL8,CXCR5,CYCS,DUSP4,DUSP6,E2F5,EDN1,EGR1,ELMO1,ENOPH1,ERRFI1,ETV5,FAS,FHL2,FLT1,FXYD6,FYN,GADD45B,GDF15,GNA13,GSN,HBEGF,HEATR1,HFE,HIP1R,HMOX1,HSPD1,IARS1,ICAM1,IER3,IKBKE,IKBKG…	2003 (13)
GnRH analog		biologic drug		0.86	6.66e-09	ABCC1,ACTN1,ACTN4,ADAM8,ADD2,AFF2,AHCYL1,ANKLE2,ANXA11,ARHGAP1,ARHGEF7,ATP11B,ATRN,BCL2A1,BCL3,BHLHE40,BICD2,BST2,CADM4,CALR,CAMKK2,CAPNS1,CASP3,CASP8,CCNC,CCP110,CDK1,CDK5,CENPF,CHMP2A,CIAO1,CKS1B,CLOCK,CNPY3,COL6A1,CRIP2,CUL5,CUX1,CYC1,DAXX,DNAJC8,DUSP1,EFNA2,EIF4EBP1,EML2,ENSA,ERCC5,ESRRG,EXT2,FAM214B,FAS,FBLN5,FGF2,FKBP1A,FLT1,FN1,FOXJ3,GATD3A/GATD3B,GDF1,GPER1,GPSM2,GRB2,GSTO1,HDDC2,HEBP2,HI…	1914 (20)
MTOR	0.092	kinase		-1.643	6.83e-09	ACACB,ACADL,ACADM,ACLY,ACOX1,ADM,AIFM1,AKR1B1,ALDH1A3,ARL4C,ARNT,ATP2A2,ATP2B1,ATP5PB,BCL2A1,BCL2L1,BEX1,BIRC5,CASP1,CASP3,CASP8,CCND1,CCND3,CD274,CDH1,CEBPB,CEBPD,CFLAR,CHKA,CKMT1A/CKMT1B,CLTC,CNP,CPT2,CSF1R,CTNNB1,CTNND1,CXCL1,CXCL2,CXCL8,CXCR4,CYCS,DDAH2,DHFR,DMD,EFNA1,EGFR,ELOB,EOMES,EPAS1,EPRS1,ERCC1,ETFA,FABP5,FBXO32,FDPS,FGB,FGFR3,FKBP1A,FN1,FST,GLG1,GLUD1,GSTZ1,HIF1A,HK1,HK2,HSP90B1,HSPB1…	2193 (16)
LY294002		chemical - kinase inhibitor	Activated	4.024	7.56e-09	ABCA1,ABCB1,ABCC1,ADAM17,ADIPOR1,ADIPOR2,ADRB2,AKT1,ALOX5AP,AQP3,ATF4,ATP2B1,AURKA,AXIN1,BAD,BAK1,BBC3,BCL2L1,BDNF,BHLHE40,BICD1,BIRC3,BIRC5,BMI1,BMP2,BRCA2,CA9,CASP3,CASP4,CCN1,CCN2,CCNB1,CCND1,CCND3,CD14,CD274,CD2AP,CDH1,CDK2,CDK6,CDKN1B,CDKN2B,CDKN2D,CEBPB,CFLAR,CHML,CLCN3,CLDN4,COL1A1,CSF2,CST3,CTNNB1,CUL4A,CXCL1,CXCL16,CXCL2,CXCL3,CXCL8,DHFR,DSCAM,DUSP1,DUSP4,DUSP6,EDIL3,EFNB2,EGFR,EGR1,EPAS…	1939 (14)
ERBB3	-3.027	kinase	Inhibited	-2.095	8.45e-09	ACTB,ADAM19,ADAM9,AMOTL2,AXL,BGN,CCN1,CCN2,CCND1,CD47,CDH1,CDKN1B,COL1A1,COL6A1,CXCL12,CXCR4,DUSP1,EGFR,EGR1,EIF6,ERBB2,ERBB3,ETV5,EZR,F3,FBLN2,FBN1,FGF2,FN1,GAS6,GHR,GJB3,HAS2,HBEGF,HEXB,HIF1A,HMGB1,HMOX1,IER2,IGF1R,IGFBP5,LAMA4,MATN2,MICA,MXI1,NID1,PHGDH,PIM2,PLK1,PTEN,PTGS1,PTGS2,RRAS,SGK1,SOCS3,SPARC,STAG2,STMN1,TGM2,TIMP3,TK1,TLN1,TNC,TNS1,TOP2A,TSPAN3,USP14,VEGFA	2419 (18)
mycophenolic acid		chemical drug	Inhibited	-5.414	8.53e-09	ADM,ADRB2,BIRC3,C1orf116,CCN1,CCN2,CCND3,CD274,CD46,CD59,CD63,CDK6,CDKN1B,CLDN1,CSGALNACT2,CXCL3,CXCL8,CXCR4,DAPP1,DUSP1,DUSP14,EDN1,ETS1,FN1,GBP1,GNL3,HBEGF,HNRNPD,HSPA5,ID3,IL1B,IL6,KRT6B,LDLR,MGAM,MME,MYBL1,MYL12A,NFKB2,OCLN,OLR1,PDLIM5,PTGS2,RGS4,RUNX2,SAMD4A,SERPINB2,SLC30A1,SNAPC1,SOD2,STYK1,TNFAIP3,TUFT1,UGCG	1741 (13)
triamcinolone acetonide		chemical drug		1.414	8.82e-09	ACSL1,ADCY7,ALDH5A1,ANGPTL4,ANOS1,AQP3,ARL4C,ATP11B,B4GALNT1,BCL2A1,BHLHE40,BID,BMP2,BMP4,BMP6,BMP7,CAPG,CASP4,CBX4,CDC5L,CHKA,COL13A1,CRYBG1,CSNK1G2,CTH,DCBLD2,DUSP1,DUSP10,DYRK3,E2F2,EFNB2,EFS,EGR1,ELK3,EPHA4,FKBP5,FUS,GAS1,GNAZ,HFE,IER2,IGFBP3,IGFBP4,IL6ST,INSIG1,IRF2,IRF7,JUN,JUNB,KLF10,KLF15,KLF9,LDLR,MARVELD2,MDFI,MT1E,MT1F,MT2A,MXD4,MXRA5,NEK7,NFATC3,NFKBIA,NOS2,NR3C1,OCA2,PALLD,PCDH19,PDI…	2554 (20)
LDL		complex	Inhibited	-3.711	9.81e-09	ABCA1,ADCY1,AKAP1,APOBEC3B,ARG2,ATP2A2,AXL,BAD,BCL2A1,BCL2L1,BMP2,C3,CAMK2B,CAPN1,CAPN2,CASP1,CASP10,CASP3,CASP6,CASP7,CASP8,CBS/CBSL,CCN2,CCND1,CDH5,CDK1,CFLAR,CLIP2,CSF2,CTNNB1,CXCL11,CXCL2,CXCL3,CXCL8,DLL4,DUSP1,ECE1,EGR1,EMB,ERBB2,F3,FAS,FDPS,G0S2,GAS6,GCLM,GNAI1,HAS2,HAS3,HIF1A,HMOX1,HSP90B1,HSPA5,HYOU1,ICAM1,IFIT2,IFITM1,IGF1R,IGFBP2,IGFBP3,IGFBP4,IL17RC,IL1A,IL1B,IL6,INSIG1,IRAK3,IRAK4,IRF…	2138 (15)
miR-155-5p (miRNAs w/seed UAAUGCU)		mature microRNA	Activated	4.208	1.03e-08	AGTR1,AMIGO2,ARFIP1,ARFIP2,ARL10,ATP6V1C1,BRPF3,CASP1,CBFB,CCN1,CCND1,CD47,CEBPB,CHAF1A,CLDN1,CSF1R,CTNNB1,CUL4B,CUX1,CXCL1,CXCL2,CXCL3,CXCL8,DHX40,DPP7,DSG2,EGFR,ETS1,FAR1,FGD4,GNA13,HSDL1,IKBKE,IL12A,IL13RA1,IL1A,IL1B,IL23A,IL6,INPP5D,JARID2,KRAS,LDOC1,LPL,LY6K,MAF,MAFB,MET,MLH1,MOSPD2,MSH2,MSH6,MSI2,MYD88,MYO10,MYO1E,NARS1,NOS2,NT5E,PDE3A,PDLIM5,PICALM,PIK3R1,PLXND1,PMAIP1,POLE4,PPL,PRKCI,PTGS…	1289 (11)
HSF1	0.125	transcription regulator		0.066	1.04e-08	ABCB1,ACADL,ACLY,AHSA1,ATN1,ATP5PF,B2M,BAG3,BCL10,BCL2L1,BMP4,BMP7,BST2,CCDC117,CCN2,CCT3,CCT4,CCT7,CCT8,CD274,CDC6,CDH1,CDK1,CEBPB,CELSR1,CENPA,CFLAR,CHD3,CKS1B,CLDN7,COL18A1,COL6A2,CTNNB1,CUL1,DHX34,DNAJA4,EFEMP1,EIF4A2,ELAVL1,FKBP4,FOXM1,FXR1,HDAC5,HERC4,HMGB1,HMOX1,HNRNPA3,HSBP1,HSF2,HSPA1A/HSPA1B,HSPA4,HSPA4L,HSPA8,HSPB1,HSPD1,HSPH1,ICAM1,IL1B,IL6,IL7R,ITGB3BP,ITGB5,JARID2,JUN,LAMA4,LDLR,LIF…	1457 (16)
EPAS1	-2.236	transcription regulator	Inhibited	-2.157	1.06e-08	ABI1,ACLY,ACP5,ADM,ANGPTL4,APLN,AREG,ARG2,ATG5,AXL,BBC3,BHLHE40,BIRC3,CA9,CAT,CAV1,CCN1,CCN2,CCN5,CCND1,CD274,CDC42EP5,CEBPB,CEMIP,CHKA,CKB,CKMT1A/CKMT1B,CLDN1,CXCL12,CXCL2,CXCR4,DECR2,DGAT1,DGAT2,EDN1,EGFR,EGLN3,FAM13A,FBLN2,FGF2,FHL1,FLT1,FN1,FXN,GADD45B,GBE1,HIF1A,HILPDA,HOXA5,HSPA4,HSPA5,ICAM1,IGFBP3,IGFBP5,IL6,IRS2,ITGAV,ITIH5,ITPR1,KDM4B,LDLR,LOX,LOXL2,LPL,MAFF,MANF,MCM3AP,MIF,MMP14,MYOM2,N…	2177 (18)
tanespimycin		chemical drug		-1.043	1.33e-08	AHR,AHSA1,AKT1,AKT2,AKT3,ARRB2,AXL,BAK1,BCL2A1,BCL2L1,BIRC3,BIRC5,CALM1 (includes others),CAPN1,CAV1,CCND1,CDK1,CDK6,CDKN1B,CDKN2B,CFLAR,COL11A2,CXCL8,CYCS,ERBB2,FAS,FDFT1,GRN,HNRNPA1,HNRNPA2B1,HNRNPC,HNRNPM,HRH1,HSP90B1,HSPA1A/HSPA1B,HSPA5,HSPA8,IARS1,IGF1R,JUN,KIT,KRAS,KRT18,KRT8,LYN,MAP3K7,MCL1,MIF,MITF,PLAU,PRDX3,PRMT5,PSMA7,PTCH1,RAF1,RBMX,RPL24,RPL27A,RPS8,SERPINH1,SLC2A1,SNAI2,SNRPE,SOD2,S…	2081 (17)
LDB1	-0.197	transcription regulator		1.183	1.48e-08	ABCB10,ABL2,ACTB,ADAMTS9,AHR,ANXA1,ARID3A,AXIN2,BBC3,BCL11A,BCL9,BMP7,BMPR2,CASP1,CASP3,CASP4,CAT,CCND3,CDH13,CDH5,CERS4,CGAS,CLDN4,COL18A1,CYFIP2,DAB2IP,DACT3,DDHD2,DHX58,DLX1,DUSP15,DUSP22,EFEMP2,EGLN3,ENG,ENTPD6,EPHB4,FGFR3,FLOT2,FNDC3B,FTH1,FZD5,FZD6,GALNT1,GDF11,GOLM1,GPRC5B,GRB10,GSDME,GSN,GTSE1,HHEX,HLX,HOXA5,HOXA7,HS1BP3,ICOSLG/LOC102723996,IFIH1,IGF2BP3,IL1RAP,INPP5B,IRAK1,IRS2,JARID2,KC…
INSR	0.762	kinase	Activated	3.02	1.67e-08	ACADL,ACADM,ACADS,ACADVL,ACO2,ACOT2,ACSL1,ACSL4,ACSL5,ACTN4,ALDH6A1,ANKRD1,AREG,ARFGAP2,ARHGDIA,ARL4A,ATP2A3,ATP5F1B,ATP5F1D,ATP5MC1,ATP5MC3,ATP5PF,BAG1,BCL2A1,BIRC5,CASP6,CCN2,CCND1,CDC45,CDC5L,CDC6,CDK1,CFL1,CKMT1A/CKMT1B,CORO2B,CPT2,CRAT,CRY1,CTSB,CTSV,CXCR4,CYC1,CYCS,CYP1B1,DCTN4,DDR2,DECR1,DHCR7,DLX1,DUSP1,ECI1,EDN1,EGR1,ETFA,FDFT1,FDPS,FHL1,FLNC,FOXC2,FURIN,GADD45A,GAPDH,GAS1,GATA6,GCK,GMCL…	2405 (22)
poly rI:rC-RNA		biologic drug	Inhibited	-9.136	1.75e-08	ABCA1,ADAM10,AFAP1,AGRN,ANXA1,ARHGAP40,ARMC4,ASB13,ATF4,ATP6V0A2,AUTS2,AXL,B2M,BAK1,BIRC2,BIRC3,BIRC5,BMP2,BST2,BTC,BTN3A3,C3,CASP7,CCND3,CCT7,CD14,CD274,CD47,CDC14A,CDCA3,CDH1,CDH2,CEACAM1,CEBPB,CEBPD,CFLAR,CGAS,CHN1,CLEC7A,CNP,CSF1,CSF2,CTNNB1,CXCL1,CXCL11,CXCL2,CXCL3,CXCL8,CXCR4,CYP27B1,DAXX,DDX58,DDX60,DHX58,DISC1,DLL4,DLX1,DUOX1,DUSP1,DUSP5,EDN1,EFNB3,EGR1,EIF2AK2,ELAVL2,ELF3,ERFE,ETNK1,EZR,…	1800 (15)
methylprednisolone		chemical drug		-0.314	1.82e-08	ABCB4,ABI1,ACSL1,ADAM17,ADCY6,ADGRL2,ADK,AKR1C3,ANXA1,ANXA2,ANXA3,AP2A2,ARL4A,ASAH1,ATP1B1,ATP2A2,ATP5F1C,ATP5IF1,ATRN,AZIN1,B2M,B4GALNT1,BAIAP2,BDH1,BDNF,C1QBP,CAMK1,CCN2,CCND1,CCNG1,CD9,CDH1,CDH13,CDH2,CDH3,CLDN7,CLEC4F,CNN3,CNP,CPS1,CROT,CSNK2A1,CST3,CTSC,CTSH,CTSS,CTSV,CXCL3,CYC1,CYCS,CYP4F3,DMD,DNPH1,DSC2,DSG3,DUSP1,DUSP6,ECE1,EDA,EFNA1,EMP1,ENPP2,F3,FABP5,FARSA,FBLN5,FBXO30,FBXO32,FDFT1,FKB…	2422 (17)
FOXM1	-0.694	transcription regulator		-1.037	1.86e-08	ADAM17,ANXA1,AURKA,AXIN2,BIRC5,BRCA2,BRIP1,CAT,CAV1,CCNA1,CCNB1,CCNB2,CCND1,CCNE2,CCNF,CDC25A,CDC25B,CDCA8,CDH1,CDH2,CDK1,CDK2,CDKN1B,CDKN3,CENPA,CENPB,CENPE,CENPF,CKS1B,CTNNAL1,CTNNB1,CXCL12,FLT1,FOXF1,FOXM1,GTSE1,HOTAIR,IKBKB,IL6,IPO7,JUN,KIF20A,LAMA4,LEF1,LOX,MAPK8,MET,MKI67,MMP2,NBN,NEDD4,NFKB1,NFKB2,PDGFA,PLAUR,PLK1,POU5F1,PRDX2,PTCH1,PTCH2,PTTG1,RMI1,SNAI2,SOD2,SOX2,SQSTM1,STAT3,STMN1,TGFBR…	2215 (20)
DSCAM	-7.715	other	Activated	3.79	2.05e-08	ATF5,CNTN1,CNTNAP1,CREB3,DAB1,EFNA3,EFNB3,ELMO1,EMX1,ETV5,FRK,GABBR2,GSN,ID3,IRS1,JAK2,KCND3,KCNJ4,KIF17,KLF9,LHX2,MAPT,MICALL2,MYT1,NEFH,NEURL1B,NGEF,NLGN2,NRCAM,NREP,NTN4,NTRK2,PAX2,PCDH17,PDGFA,PDGFB,PLCB1,PRKCH,RGMA,ROBO2,ROR2,SEMA3E,SEMA7A,SHANK2,SLC1A1,SLC29A4,SNCAIP,SYNGR3,SYNPO,SYT12,SYTL4,TAC1,TAL1,TUBA4A,TUBB4A,UNC5A,VIM,WNT7B
RAF1	0.489	kinase	Inhibited	-5.497	2.59e-08	ANKRD1,ANKRD2,ANXA1,AP2B1,AREG,CCN5,CCND1,CDC25A,CDC6,CDKN1B,CDKN2B,CDON,CHN1,CLDN1,CSF2,CSTA,CSTF1,CTNNB1,CTSH,CXCL3,CXCR5,DCBLD2,DHRS3,DUSP4,DUSP5,DUSP6,E2F1,EGR1,EMP1,ERBB2,FAM13A,FAM171A1,FAS,FGFBP1,GRN,HBEGF,HIF1A,HNRNPA2B1,HPCAL1,HSPB1,ID3,IER2,IER3,IGF1R,IGFBP3,IL12A,IL1B,IL1R1,IL23A,IL6,ITGA2,ITGB1,ITGB5,JUN,LAMA3,LDHC,LIF,LIFR,LPGAT1,MCF2L,MET,MGLL,MKI67,MT1F,MXD1,NFKB1,NINJ1,NQO1,OCLN,O…	1843 (14)
EIF2AK2	-1.746	kinase	Inhibited	-4.654	3.22e-08	AKT2,ATF4,BCL2A1,BCL2L1,BDNF,BHLHE40,BIRC2,BIRC5,BRIP1,CCND1,CEBPB,CEBPD,CFLAR,CXCL8,DDX58,EGR1,EIF2AK2,ERAP2,FAS,GABBR1,IFI27,IFI35,IFI6,IFIT1,IFIT5,IFITM1,IFITM2,IL1A,IL1B,IL6,IRF1,IRS2,ISG15,ISG20,KCTD13,LGALS3BP,NFKB2,NFKBIA,NMI,NNMT,NOS2,OAS1,OAS3,PARP12,PARP9,PLSCR1,PSMB10,REC8,SAMHD1,SOCS3,SOD2,STAT1,TNFAIP3,TP53,TUBA1A,UBE2L6,XIAP,ZC3HAV1,ZNF532	1301 (15)
Akt		group		0.2	3.36e-08	ADM,AMOT,ANKRD1,ANKRD2,AQP3,ATF4,B4GALT5,BAD,BAK1,BBC3,BCL2A1,BCL2L1,BHLHE40,BID,BIRC2,BIRC5,BMP2,CCN2,CCND1,CCND3,CD274,CDH1,CDKN1B,CEBPB,CFLAR,COL2A1,COL3A1,CPT1A,CSF2,CTNNB1,CTSD,CXCL12,CXCL8,CXCR4,DLL4,E2F2,EGFR,EPAS1,ERBB3,ETS1,F3,FAS,FBXO32,FHIT,FKBP5,FN1,FOSL1,FOXM1,FOXO1,GATA2,GCK,GLI1,GLI2,GSK3B,GSR,GSS,HIF1A,HK2,HMOX1,IER3,IGF1R,IGFBP2,IL12A,IL1B,IL1R1,IL32,IL6,IL7R,INSR,JUN,LEF1,LMNA,L…	1910 (13)
RELA	0.081	transcription regulator	Inhibited	-4.888	3.45e-08	ABCB1,ACTN4,AHR,ALCAM,ALOX5AP,ANKRD1,ANKRD2,APP,ARHGDIB,ASCL2,B2M,BBC3,BCL10,BCL2A1,BCL2L1,BCL3,BEX1,BEX2,BHLHE40,BIRC2,BIRC3,BIRC5,BMP2,BRCA2,C3,CASP3,CASP8,CAV1,CBS/CBSL,CCN2,CCND1,CD14,CD274,CD59,CDH1,CDKN1B,CEBPB,COL1A1,COL2A1,CSF2,CTSB,CTTN,CXCL1,CXCL11,CXCL2,CXCL3,CXCL8,CXCR4,DNMT3B,DUSP1,E2F1,EDN1,EGLN1,EGR1,ELF3,ELMO1,EOMES,EPAS1,EPCAM,ERAP1,ERAP2,ERBB2,F3,FABP6,FAS,FGF2,FMN2,FN1,GBP1,GDF…	2040 (15)
ERK		group	Inhibited	-5.902	3.54e-08	ABCA1,ACP5,ACSL5,ACTN1,ADAM10,ADGRG6,AREG,ARG2,ARPC2,AXL,BCAR3,BCL2L1,BGN,BTG3,CAV1,CCK,CCN2,CCND1,CCND3,CDH1,CDKN1B,CEBPD,CFLAR,CLDN4,COL1A1,COL3A1,CSF2,CTNNB1,CTTN,CXCL1,CXCL2,CXCL8,DNMT3B,DUSP1,DUSP4,EDN1,EGFR,EGR1,EIF2AK2,EPAS1,EPHA2,ESRRA,ETS1,FAS,FGF2,FN1,FOSL1,FOSL2,FOXO1,FST,GDF15,GK,HAS3,HBEGF,HEY1,HEY2,HMGA1,HMOX1,HOMER1,ICAM1,IER3,IL12A,IL1B,IL23A,IL6,INPP1,IRS1,ITGAV,JAG1,JUN,JUNB,KLF…	1688 (13)
desmopressin		biologic drug		-0.331	3.83e-08	ACTB,ADCY3,ADM,AHNAK,AKR1B1,ANK3,ARFGEF2,CAPG,CARD14,CGNL1,CTNNB1,CTSD,DISC1,EIF4B,F8,FLNA,GAPDH,GNG12,GOLGB1,H3-3A/H3-3B,HSPA1A/HSPA1B,HSPA8,HSPH1,KIF26A,LIMA1,LMNA,MME,MTFR1L,MYH10,PALM,PAX2,PHLDB2,PLS3,PLXDC2,PPIA,PPP1R1A,PPP2R5D,PSMD11,PUM1,PXN,RBM14,RHOA,RMDN3,RPS3,S100A11,SLC2A4,SLC43A2,SLC9A3,SNX3,SORT1,SPTBN2,ST14,STX7,TNS1,YWHAB,YWHAQ,YWHAZ
ZBED6		transcription regulator		1.829	3.84e-08	ANKRD50,ARHGEF1,ARL4C,BOP1,COL13A1,CRIM1,DLGAP5,FOSL2,GCK,KCTD1,LAMP3,MAFA,MAP3K14,MB21D2,MYBL1,NASP,PDX1,PMEPA1,PPAT,PRPF19,SGK1,SPTBN1,TCF7,UPP1,WWC1,WWTR1,ZEB1
prednisolone		chemical drug		1.261	4.03e-08	AKT1,ALPP,APP,ARSA,ATG4C,ATG5,ATG9B,BAD,BAG1,BAG3,BAK1,BCL2L1,BCL2L10,BCL2L2,BID,BIRC2,BIRC3,BNIP2,CALCB,CASP3,CASP8,CAT,CDK5,CDKN1B,CEBPD,CFLAR,CTSB,CTSS,CXCR4,CYGB,DAPK1,DRAM1,DUSP1,DUSP10,EDN1,EVA1A,FAS,FBXO30,FBXO32,FKBP5,GABARAPL2,GABPB1,GK,GLI1,GM2A,GPX3,HDAC1,HEY1,HEY2,HGS,HIF1A,HSPA8,HTT,IFT172,IGF2BP3,IL1B,IL6,INSR,IRS2,ISG20,ITGA4,JAG1,KLF9,LDLRAD4,LHX4,LIMK2,MAP1LC3A,MAP2K1,MAPK14,MAPK…	2240 (14)
gefitinib		chemical drug		0.873	4.12e-08	ADAMTS15,AKT1,ANO9,ARC,AREG,AURKA,BCL2L1,BIRC5,C3,CCNB1,CCND1,CCNE2,CCNF,CD274,CDC6,CDH1,CDH2,CDK2,CDKN1B,CDKN2D,CEBPB,CEBPD,CFLAR,CHEK1,CHEK2,CKAP2,COL1A1,COL8A1,CTNNAL1,CTSA,CTSB,CXCL2,CXCL8,DHFR,DUSP4,ECT2,EFNA1,EGFR,EPGN,EPSTI1,ERBB2,ETV4,ETV5,FLT1,FOSL1,FRAT2,GADD45B,GCNT3,GHR,GLI1,HMOX1,HSP90B1,HSPB1,HYAL3,ID1,ID4,IGFBP5,IL7,ITGA2,KIF23,KIT,LIFR,MAFF,MAP4K4,MCM3,MKI67,MMP11,MTBP,NFKB2,NOTCH…	2473 (18)
SPDEF	-2.61	transcription regulator		1.189	4.6e-08	BIRC3,CCN2,CDH2,CLDN7,COL13A1,COL16A1,COL1A1,COL4A1,COL4A2,COL4A5,COL4A6,COL5A1,COL6A1,COL6A2,CXCL8,CYFIP1,DKK3,EGFR,FGFR1,FZD8,HIF1A,ITGA3,ITGA5,ITGA6,LAMC1,LASP1,LEF1,PLAU,PLAUR,PRKCA,PTPRF,SDC1,SDC2,SMAD2,SMAD3,SNAI2,SQSTM1,STMN1,TGFB1,TNC,VASP,VEGFB,VIM,WNT5A,ZEB1	2029 (15)
CRNDE	3.791	other	Inhibited	-2.175	4.84e-08	ABL2,BCL2L1,DUSP10,DUSP4,DUSP5,DUSP6,DUSP8,E2F3,EGFR,EPHA2,FGFR3,FOXO4,GADD45B,IL1R1,MAP3K8,NR4A1,NTF4,PDGFA,RAC2,RASA3,RASGRP2,RIN1,RRAS,SMC1A,STK3,TAOK3,TGFB1,VEGFA	1979 (17)
miR-29b-3p (and other miRNAs w/seed AGCACCA)		mature microRNA		1.075	4.88e-08	ADAMTS14,ADAMTS15,ADAMTS2,ANGPTL4,ARPC3,CAV2,CCND1,CDK6,COL1A1,COL3A1,COL4A1,COL4A2,COL4A5,COL5A1,COL8A1,DNMT3B,EOMES,FAM3C,FBN1,FRAT2,GAS7,GMFB,HMGN3,INSIG1,KCTD3,LAMC1,LOXL2,MAPRE2,MCL1,NASP,NAV3,NID1,NID2,P3H1,PDGFA,PDGFB,PIK3R1,PLEC,PLOD2,PMP22,PPIC,PPM1D,PTEN,SHROOM2,SPARC,SRSF10,TET1,TGFBR2,TNFAIP3,TP53,TRIM9,VCAN,VEGFA,ZFP36L1	1496 (10)
BMI1	1.714	transcription regulator		-0.333	4.89e-08	AURKA,BMI1,CADM1,CASP8,CD63,CDC14A,CDH1,CDKN1B,CDKN2B,CDKN2D,CLVS2,CUL1,CYFIP2,FAS,FBXW7,GLIPR1,H2AX,HK2,HOXA9,HOXB9,ID4,JPH3,LOX,MCM3,MET,MYT1,NFKB1,NGFR,NID1,PARP9,RASSF5,RASSF9,RRM1,SELENON,SMAD3,TERT,TP53,TP53I3,TUSC3,VEGFC,VEZT,VIM,WNT10B	2042 (20)
imatinib		chemical drug		-0.176	5.11e-08	APP,ARID3A,ATP1B1,ATP1B2,ATP2B1,ATP2C1,ATP5F1D,ATP5MC2,ATP5MC3,ATP5PB,ATP6V1C1,AURKA,BCAP31,BCL2L1,BCR,BIRC2,BIRC5,BMP2,BMP7,CACNA1B,CALR,CAPN1,CASP10,CASP3,CASP7,CASP8,CCNB1,CCND1,CD274,CDC45,CDC7,CDK2,CDKN1B,CEBPB,CFLAR,CHEK1,CKS1B,COL1A1,COL3A1,COPB2,COX7B,COX7C,CSF2,CTNNB1,CXCL12,CXCR4,CYC1,DNAJB11,ECT2,EIF4B,EPAS1,ETV5,FN1,GADD45A,GSPT1,HMGB1,HMOX1,HSBP1,HSP90B1,HSPA5,HSPA8,HYOU1,ID1,IFIT2,I…	2243 (15)
AGT	-3.554	growth factor	Inhibited	-5.334	5.12e-08	ADAM12,ADAM17,ADAM23,ADIPOR1,ADM,AGTR1,ANK3,ANXA1,ANXA3,APLN,ARID1B,ASL,ATP1B1,ATP2B1,BDKRB2,BDNF,BGN,BMP6,BOK,CACNA1C,CACNA2D1,CALR,CASP3,CASP8,CAT,CAV1,CCN2,CCND1,CCND3,CCNE2,CDC25A,CDH13,CDH5,CDK1,CDKN1B,CGREF1,CLGN,COL11A2,COL1A1,COL3A1,COL4A1,COL4A6,COL6A1,COX5A,CRABP2,CREB1,CREB5,CTSS,CXCL2,CXCL3,CXCL8,CYTH3,DDAH2,DHFR,DLL4,DUSP1,EDN1,EFEMP1,EFNB2,EGFR,EGR1,ENG,ERRFI1,ETS1,F3,FDFT1,FGF13,FG…	2360 (17)
CDKN2A	-0.243	transcription regulator		0.57	5.77e-08	ANAPC5,ATAD2,BBC3,BIRC5,BLM,BMI1,BTG3,C3,CAPG,CASP3,CCN2,CCNA1,CCNB1,CCND1,CCND3,CCNG1,CCNI,CDC25A,CDC25B,CDCA7L,CDK1,CDK2,CDKN1B,CDKN2B,CDKN2D,CEBPB,CEBPD,CENPK,CHAF1A,CPA4,CUL1,CXCR5,DCK,DCTN4,DDR1,DHFR,DUSP1,E2F1,E2F2,E2F3,EBF1,EFNA1,EGR1,EHD3,EPS8,ESS2,FAM111A,FAM86B1,FBL,FBXO5,FGFR1,FHL2,FMN2,FOXA1,FST,GAS7,GNA13,GNL3,GPRC5A,GRN,GSPT1,GTF3C1,GTSE1,H2AX,HACD3,HOXB9,HOXC4,HUNK,IFI35,IGF2BP3,IG…	2114 (20)
KDM1A	0.822	enzyme	Activated	2.103	6.77e-08	ADM,ARHGDIB,ARNTL2,ATAD2,ATP6V0E2,BARX2,BCL7A,BLM,BMP2,BRCA2,BRIP1,C1orf116,CDA,CDH1,CDH4,CENPF,CENPK,CENPU,CHAF1B,CHD4,CHN1,CLDN12,CLDN7,COL1A1,CRYM,CTNNA1,CTNNB1,DAPP1,DDR2,DKK1,DNMT3B,EBF1,EIF2AK2,ELL2,ELOVL7,EOMES,FOXM1,FOXN4,FOXO1,GATA4,GLT8D2,GREB1,HAS3,HIF1A,HOXB7,IGF1R,IGFBP4,IKZF3,IQGAP2,IRAK3,KHDRBS3,KRT18,KRT8,LATS2,LCK,LGR5,MCM3,MCM6,MPC2,MSX2,MYO1B,NEBL,NEK3,NFE2L3,ONECUT2,PHLDB2,POL…	2520 (23)
STAT4	-0.085	transcription regulator	Inhibited	-3.126	7.02e-08	ACADL,ACSS1,AHNAK,AP2A2,ARMCX1,ASPH,ATF4,BAD,BCL2L1,BCL3,C3,CAPN5,CCNI,CDK2,CDKN1B,COPG1,CXCL2,CXCL3,DAP,DAPK2,DDAH2,DDX58,DPM3,ERO1A,ERRFI1,ETV5,FURIN,FZD7,GBE1,GCNT2,GLG1,GRTP1,H3-3A/H3-3B,HCFC2,HES6,HEXB,HILPDA,IER3,IFIH1,IFIT2,IL12RB2,IL6,ING2,IRF1,ISG15,ISG20,ITGA7,ITIH5,JAG2,KLF9,KRT18,LRP1,LRRFIP1,LTBP3,LUC7L,MAGED1,MAP3K8,MAPK8IP3,MATK,MBOAT2,MLLT3,NSD3,NXN,P4HA2,PCGF5,PDK1,PER1,PEX13,PFN…	1894 (15)
sirolimus		chemical drug		-1.89	7.25e-08	ACACB,ACADM,ACADVL,ACTB,ADA,ADM,AKT1,APP,APPL1,AQP3,ARF1,ARHGDIB,ATF4,ATP5F1C,ATP5MC1,ATP6V1D,AURKA,B2M,BAG1,BBC3,BCL2A1,BCL2L1,BCL3,BCORL1,BEX1,BEX2,BID,BIRC5,BMP2,CALD1,CASP3,CCN2,CCNB2,CCNC,CCND1,CCND3,CCNF,CDA,CDC25A,CDK1,CDK8,CDKN1B,CEBPB,CFD,CFLAR,CHEK1,CLIC1,COL1A1,COX6C,CRAT,CSF1,CSNK2A1,CXCR4,CYCS,DNAJC2,DOT1L,DPP7,DVL3,E2F1,EEF2,EGR1,EIF2AK2,EIF2S1,ERBB2,ERBB3,ERCC1,F3,FAS,FGF2,FGF9,FN1…	2307 (20)
CD40LG		cytokine	Inhibited	-3.37	7.4e-08	A4GALT,ADAM17,AHR,ALCAM,ANXA6,ANXA7,APRT,ARID4B,ASCC3,ATF5,AXL,B2M,BATF3,BCL2A1,BCL2L1,BIRC2,BIRC3,BTG3,CASP1,CAST,CCN2,CCND3,CCNG1,CD207,CD63,CD8A,CDC25B,CDK6,CDKN1B,CELF2,CFLAR,CLIP1,CLNS1A,CSF1,CSTF2,CTSC,CXCL1,CXCL2,CXCL8,CXCR4,CYP1B1,DAPP1,DECR1,DUSP1,DUSP4,DUSP5,E2F2,EGFR,EGR1,EIF2AK2,EIF2S1,F3,FAS,FBL,FLT1,FOSL2,FURIN,G0S2,GADD45A,HDDC2,HIF1A,HK2,HSPA1A/HSPA1B,ICAM1,ICOSLG/LOC102723996,ID3…	1614 (13)
SHH	5.65	peptidase		1.541	8.31e-08	AMH,ATF5,BCAR1,BMP2,BMP4,CALCB,CAV1,CCNB1,CCND1,CDC25A,CHEK1,DAAM1,DHFR,DLX2,DLX5,EBF1,EGFR,EHBP1,EMX1,EPHB4,ERBB4,FN1,FOXA1,FOXC2,FOXF1,GATA2,GATA4,GDNF,GLI1,GLI2,GPC1,H2AX,HAND2,HEY1,HEY2,HHIP,HK2,HMGA1,HOXA13,HOXD11,HOXD13,ID1,IGFBP5,IL6,IMPDH2,LASP1,LFNG,MAGI1,MCM3,MCM5,MCM6,MEF2C,MSX1,MYBBP1A,NKX2-1,NKX2-2,NKX2-5,NKX3-2,NR2F2,NR4A1,OCLN,OLIG1,OLIG2,OTX2,PAX2,PAX3,PAX6,PDX1,PFN1,PITX2,PMP22,P…	1888 (20)
SMAD4	-0.345	transcription regulator	Inhibited	-2.911	9.33e-08	ANGPTL4,AREG,BBC3,BGN,BMI1,BMP2,BMP4,BMP7,CAB39,CBFB,CCN2,CCND1,CDC42EP3,CDH1,CDH2,CDH3,CDH5,CDK17,CDKN1B,CDKN2B,CELF2,CLDN7,COCH,COL2A1,COL7A1,CSF1,CTNNB1,CTSD,CYB561,DAPK1,DAXX,DOCK4,EDN1,EGFR,EIF4EBP1,ENG,ERBB2,ERCC5,FGFR3,FN1,FST,FSTL3,GADD45A,GADD45B,GCNT1,GLI1,HAS2,HHEX,HMOX1,ICAM1,ID1,IER3,IL11,IL1B,INPP5D,IRAK3,ITGA6,ITGB1,ITGB5,JAG1,JAG2,JAM2,KLF15,LEF1,LHX1,LINC00842,LPAR1,MBD1,MET,MST1…	2451 (19)
ATF4	1.699	transcription regulator		-1.11	9.89e-08	AARS1,ABCA1,ANKRD1,AREG,ARHGAP24,ATF4,ATF5,BBC3,BCL11A,CA9,CALR,CANX,CARS1,CDKN1B,CEBPB,CHAC1,CPT1A,CTH,CTNNB1,CXCR5,DDR2,EDN1,EIF2S2,EIF4EBP1,ERO1A,FN1,FYN,GADD45A,GARS1,GDF15,GRB10,HSP90B1,HSPA5,HYOU1,IARS1,IGFBP2,IGFBP5,IGFBP7,IL6,JAG1,JUN,KLF9,LARS1,LGALS3,MCL1,MED13L,MGST1,MID1IP1,MITF,MT2A,NARS1,NID2,NR1H3,OSMR,PHGDH,PMAIP1,PMP22,PPARG,PRKDC,PSAT1,PSEN1,PTGS2,PYCR1,SEL1L,SIGMAR1,SLC1A4,SLC1…	2030 (21)
SMO	1.71	G-protein coupled receptor	Activated	2.709	9.93e-08	ALCAM,BGN,CCND1,COL4A2,CXXC4,DIXDC1,DLX2,ENPP1,EPCAM,FAS,FBLN2,FOXC2,FOXD2,FOXF1,FOXF2,FZD2,FZD3,FZD7,GLI1,GLI2,GOLM2,HDAC1,HHIP,IL11,LEF1,LGR5,LHX2,LIMD2,LUM,MTMR7,NCAM1,NFATC1,NKD1,NKX2-1,NRCAM,NRP2,NUMB,PRDM1,PTCH1,PTCH2,RAI14,RUNX1,SMS,SOX2,SOX5,SOX9,SYNM,TGFA,TNFRSF10A,TNIK,VCAN,WNT7B	1951 (15)
GMNN	0.991	transcription regulator		1.193	1.07e-07	ACVR1,APCDD1,AXIN1,CDH1,CDT1,CDX2,CHST15,CITED1,COBLL1,CTNNB1,CYP26A1,DSP,DUSP1,DUSP4,DUSP5,ECSIT,EFEMP1,EOMES,EPHA2,EXT2,FARP1,FGF2,FGF5,FOXF1,GBP3,GBP4,GREB1,HAND1,IER5,IRS1,KIF16B,NCKAP1,NRP1,PCDH18,PHYHIP,PITX2,POU4F1,POU5F1,PPP2CA,SOX2,TEAD1,TEAD2,TGFB2,TNFRSF19,TP53,TWSG1,VEGFA,WLS,WNT3,WNT5A,YAP1	2364 (16)
curcumin		chemical drug	Activated	3.466	1.1e-07	A4GALT,ABCA1,ABCB1,ABCC1,ADAM17,APP,ATP1B2,AXIN1,AXL,BBC3,BCL2L1,BDNF,BIRC2,BIRC3,BIRC5,CASP10,CASP3,CAV1,CCN2,CCNB1,CCND1,CCND3,CD24,CD81,CDC14B,CDH1,CDK1,CDK2,CDK6,CDKN1B,CEBPB,CFLAR,CLDN4,CLIC1,COL1A1,COX7B,CSF2,CSNK1A1,CTNNA1,CTNNB1,CXCL1,CXCL2,CXCL8,CXCR4,DAPK1,E2F1,EDN1,EGFR,EGR1,EIF3H,ELAVL1,ELOB,EP300,ERBB2,ETS1,F3,FAS,FER,FGF2,FOSL1,FOSL2,FTH1,FTL,FYN,GABBR1,GCLM,GNA11,GRK6,GSK3B,GSR,GST…	1535 (13)
TGFB2	-4.541	growth factor	Inhibited	-4.821	1.1e-07	ABCA1,AHR,ALX1,ANGPTL4,BHLHE40,BMP4,CCN2,CD46,CD59,CDH5,CFLAR,COL1A1,COL3A1,COL4A1,COL6A2,CYP24A1,DOCK4,EDN1,EGR1,FAS,FGF2,FN1,FURIN,GAS1,HAS2,HBEGF,HEY1,HMOX1,HSPG2,ID4,ITGB5,JAG1,JAM2,KCNQ1OT1,LIPG,MLLT3,MMP2,MUC4,NOS2,NOTCH1,PDK4,PLOD2,PTAFR,PTEN,PTHLH,RGS3,RUNX1,RUNX1T1,SMAD2,SMAD3,SNAI2,SPHK1,SPP1,TAGLN,TGFB1,TGFB2,TGFBR2,TGFBR3,TIMP1,TIMP2,VCAN,VDR,VEGFA,WNT11,WNT9A,XIAP	2075 (16)
NFkB (complex)		complex	Inhibited	-7.684	1.13e-07	ABCB1,ABCD3,ADAMTS9,ADM,ADRA2C,AHR,ALDH1A3,ALDH7A1,AMH,AMPH,ANKRD1,APP,ATP2A2,B3GNT5,B4GALT1,BAD,BAK1,BAMBI,BBC3,BCL11A,BCL2A1,BCL2L1,BCL2L2,BCL3,BDNF,BEX1,BEX2,BID,BIRC2,BIRC3,BIRC5,BMI1,BMP2,C1R,C3,CAPNS1,CARD10,CASP1,CASP4,CASP7,CASP8,CBR3,CCK,CCN1,CCN2,CCNB1,CCNB2,CCND1,CD274,CD82,CD99,CDC25B,CDH1,CDX2,CEBPB,CEBPD,CFLAR,CGREF1,CITED4,CLCF1,CLIP2,COL18A1,COL2A1,CREB3,CSF1,CSF2,CSNK2A1,CTNNB1,C…	2147 (13)
MYOD1	5.762	transcription regulator		-0.284	1.27e-07	ACACB,ACSL5,ADCY7,ANKRD1,ANKRD2,ARID3A,ARNT,ATP2A1,BCL2L1,BIN1,BNC1,CBX5,CCNB2,CCND3,CDC6,CDCA3,CDK1,CDK2,CDX2,CENPE,CENPF,CEP55,COL4A1,CTNNB1,CYP2S1,DEPDC1,DHFR,DLGAP5,DMD,DUSP1,DYSF,E2F2,EGFR,EIF2AK2,ENPP2,EPHA8,ETV4,FAM83D,FOSL1,FOXM1,FYN,GADD45A,GINS2,GRB2,GREM2,HAS2,HES6,HIPK3,HJURP,HSPA4L,HSPB8,IFI16,IFIT2,IGFBP5,ITGA7,JUNB,KIF14,KIFC3,KLF6,LIF,LIPE,LMNB2,MAFB,MAP2K1,MEF2C,MEF2D,MKI67,MMP2,…	1874 (19)
E2F4	0.059	transcription regulator		-0.774	1.28e-07	ALG5,ANLN,BMI1,BRD2,CALM1 (includes others),CASP4,CASP6,CBX5,CCNA1,CCNB2,CCND1,CCNE2,CDC25A,CDC6,CDCA3,CDK1,CDK2,CENPA,CENPE,CENPO,CEP57,CHEK1,CHEK2,CKS1B,COX7C,CSTF1,DDB1,DHFR,E2F1,E2F2,E2F3,ECT2,EMC4,EPAS1,EXOSC8,FANCD2,FAS,FDFT1,FOXD3,FOXM1,GMNN,GOLT1B,H2AX,HMGB1,HSP90B1,ID3,IER5,KHDRBS1,KIF22,LPAR1,MAP3K7,MCL1,MCM10,MCM3,MCM5,MCM6,MKI67,MLH1,MSH2,NAP1L4,NASP,NDC80,NFE2L1,NPAT,NPM1,PCSK1N,PGRM…	1556 (7)
KLF4	-1.033	transcription regulator	Inhibited	-2.041	1.37e-07	ACVR1,ADRB2,ALCAM,ALPL,APCDD1,ATP2A2,AXIN1,BCL11B,BCL2L1,BMI1,CASP3,CCNB1,CCND1,CD14,CDH1,CDKN1B,CDKN2B,CDX2,CENPE,CHST15,CITED1,CLDN7,COBLL1,COL1A1,COL8A1,CRABP2,CSF1R,CTNNB1,CXCL8,CYP26A1,DLL4,DLX3,DSP,DUSP1,DUSP4,DUSP5,E2F1,ECSIT,EFEMP1,EMX2,EOMES,EPCAM,EPHA2,ESRRB,EVPL,EXT2,FARP1,FGF5,FLT1,FN1,FOXE1,FOXF1,FOXM1,GATA4,GBP3,GBP4,GREB1,GRHL3,HAND1,HEY1,HEY2,HSPB1,ID3,IER5,IFITM3,IL6,IRF6,IRS1,KI…	2427 (21)
CASR		G-protein coupled receptor		-0.832	1.38e-07	ANLN,BCL2L1,BIRC5,BMP7,CCNB1,CCND1,CCND3,CDC45,CDH1,CDKN1B,CDT1,CENPA,CHAF1A,CHAF1B,CLIP1,COL4A1,COL4A2,CSF1,DCTPP1,EDN1,EGFR,EGR1,GABBR1,GABBR2,GADD45A,GATA4,GATA6,GNAI2,ID1,IER3,IGFBP3,IGFBP5,INCENP,IQGAP1,ISG15,KEAP1,KIF22,KLK5,LBH,LGALS1,LPL,MAGI1,MYD88,NASP,NCAPD2,NFATC1,NKX2-5,PDLIM2,PPARG,PPP1CA,PTGS2,PTHLH,PTTG1,RAC1,RAD51AP1,RB1,RGCC,SERPINA1,SERPINB6,SOCS3,SPAG5,SRC,TGFB2,THBD,TK1,TLK1,…	2141 (22)
aspirin		chemical drug		1.413	1.51e-07	ABCA1,ABLIM3,ADM,ADRB2,AFAP1L1,AHR,APLN,APP,BCL2L1,BDNF,BIRC5,BMP6,CADM1,CAV1,CCND1,CDH5,CDK2,CDKN2B,CROT,CSF1,CSF2,CTSD,CXCL1,CXCL8,CXCR4,DACH1,DLL4,EFNA1,EFNB2,EMP1,ENG,F2RL1,FBLN5,FBN1,FLT1,FOXF1,GDF15,GHR,GLI1,HBEGF,HEY1,HILPDA,ICAM1,IER3,IGFBP2,IGFBP3,IL17RD,IL18,IL1A,IL1B,IL6,ITGA1,ITGA2,ITGA6,ITPKB,KIT,LAMA3,LAMP2,LIFR,MCAM,MCL1,MMP11,MMP2,NGFR,NOS2,NPC1,OCLN,OLR1,PLA2G4A,PMAIP1,PMP22,PPAR…	2268 (17)
PTP4A1	-2.615	phosphatase		-1.686	1.53e-07	AARS1,ACLY,ACTN1,ACTN4,ACTR3,ARHGDIA,B3GNT2,CDPF1,CLTC,COL5A1,COL6A1,COL6A2,CSNK2A1,EEF1A2,EEF2,EIF6,ELAVL1,FKBP1A,FLNA,GSTP1,HIF1A,HNRNPA3,HNRNPH1,HNRNPH2,HSPA1A/HSPA1B,IFI16,IGF2BP1,IGFBP7,IMPDH2,ITGA4,ITGB8,MAP3K2,MAP3K7,MAPK8,MMP14,MMP2,MYADM,NCK1,PIK3CA,PIK3R1,PKM,PPA1,PPM1E,PPP1R12A,PPP2CA,PRDX1,PRDX2,PTP4A3,RAB35,RUVBL1,SHC3,SLC35G2,SLC6A15,SMS,SOS2,SPARC,SPINT2,SRSF3,STMN1,TAGLN2,TMEM267,…
actinomycin D		biologic drug	Activated	3.378	1.6e-07	ABCA1,ACTB,ADM,APP,ARC,ARHGEF26,ATF4,BBC3,BCL10,BCL2A1,BDNF,BIK,BIRC2,BIRC3,BIRC5,CASP1,CASP10,CASP3,CASP7,CAV1,CCK,CCN1,CCN2,CCND1,CDH2,CDKN1B,CFLAR,CLEC11A,COL2A1,CPD,CTNNB1,CXCL1,CXCL8,CYP24A1,DUSP1,DUSP4,EDN1,EGLN3,EPAS1,ERRFI1,ETS1,F3,FAS,FGB,FGFR1,FLNA,FN1,FOSL2,FTH1,GADD45A,GAPDH,GDA,GSTP1,GUCY1A1,GUCY1B1,HBEGF,HIF1A,HK1,HMOX1,HNRNPA1,HOMER1,IFNGR1,IGF1R,IGFBP4,IGFBP5,IL6,IL7R,IRAK4,IRF1,I…	1563 (14)
STAT3	-1.562	transcription regulator	Inhibited	-3.811	1.62e-07	ADM,AHR,AKT1,ALDH1A3,AMER1,ANGPTL4,AREG,ARG2,ARNTL2,BAK1,BCL2L1,BCL3,BCL9L,BEX1,BEX2,BIRC5,BOC,BST2,CA9,CALHM6,CASP1,CASP3,CASP4,CASP7,CAT,CCDC88A,CCN2,CCNB1,CCNC,CCND1,CD226,CD274,CD46,CD9,CDC25A,CDH1,CDH2,CDH5,CDK1,CDKN1B,CDKN2B,CDKN2D,CDON,CEACAM1,CEBPB,CEBPD,CEP70,CFLAR,CHEK1,CLIC5,CMPK2,COL1A1,COL3A1,COL5A1,CREB1,CSF2,CTSB,CTTN,CXCL2,CXCL3,CXCL8,CXCR4,CXCR5,CYP26A1,DKK1,DNMT3B,DTX3,DUSP5,DVL…	1372 (17)
CDK4/6		group		-0.624	1.62e-07	AFAP1,AHI1,AHNAK,BCLAF1,C11orf58,CALU,CCND1,CDC45,CDC6,CDK6,DYNC1LI1,E2F1,EPHA2,ERBIN,ERRFI1,FAM120A,FLNA,GATA4,HSPB1,ITSN2,JPT1,KRT10,LASP1,MACF1,MARCKS,NCOA3,NIBAN2,NOP58,PCYT1A,PCYT1B,PDLIM4,PKP4,PPFIA2,RCN1,RHPN2,RMDN3,RPL13,RPL27A,RPS6,SEC22A,TALDO1,TUBA1C,TUFM,YLPM1,ZNF148	1350 (11)
CSF1	-2.415	cytokine	Inhibited	-2.488	1.71e-07	ACP5,ADGRE5,APP,AXL,BAD,BCL2L1,BIRC5,CAPN2,CBL,CCNB1,CCND1,CCND3,CD9,CDC25A,CDK2,CDKN1B,CLEC7A,CPM,CREB1,CSF1,CSF1R,CTNNB1,CTSD,CTSH,CXCL2,CXCL3,DHCR7,DUSP1,DUSP4,DUSP5,DUSP9,EGR1,ETS2,F2RL1,FAS,FDFT1,FDPS,FHL2,FN1,GAS7,GDF15,GPR68,HIF1A,HK2,HLA-A,HSD17B7,HSP90B1,HSPA5,ICOSLG/LOC102723996,IDI1,IFNGR1,IGF1R,IKBKE,IL12A,IL18,IL1A,IL1B,IL1RL1,IL23A,IL6,IL6ST,IRF5,IRF7,IRF8,ITGA4,ITGA5,ITGAV,ITGB1,IT…	2058 (15)
RNASEH2A	-0.271	enzyme			1.73e-07	CTSF,DDX58,GBP2,IFI16,IFI35,IFI44,IFIH1,IFIT2,IFIT3,IFITM3,IFNGR1,IL6,IRF1,IRF5,IRF7,IRF9,ISG15,ISG20,NFKB1,NFKB2,NFKBIA,NMI,OAS1,OASL,PARP9,PTGS2,RSAD2,TLR2,TLR3,TRIM21
arsenic trioxide		chemical drug	Inhibited	-3.344	2.18e-07	ALOX5AP,ARID3A,ATP1B1,ATP1B2,ATP2B1,ATP2C1,ATP5F1D,ATP5MC2,ATP5MC3,ATP5PB,ATP6V1C1,AURKA,BAD,BBC3,BCAP31,BCL2A1,BCL2L1,CACNA1B,CALR,CASP10,CASP7,CASP8,CCND1,CDC25B,CDC45,CDC7,CDK1,CDK6,CFLAR,COPB2,COX7B,COX7C,CST3,CTH,CTNNB1,CXCL8,CYB5R1,CYC1,CYP26A1,DHCR7,DNAJB11,ECT2,EPAS1,ETV5,FAS,FDFT1,FDPS,FN1,FTH1,GCLM,GLRX,GSPT1,GSR,H2AX,HIF1A,HMOX1,HSBP1,HSP90B1,HSPA5,HSPA8,HYOU1,IDI1,IFRD1,IP6K2,IRF1,ITG…	2303 (19)
TEAD2	1.247	transcription regulator		-0.928	2.19e-07	ADM,AK5,BBOX1,CALD1,CCN1,CCN2,CCND1,CCNF,CDK1,COL3A1,EDN1,FGFR4,FILIP1L,IGFBP5,KAZN,LIMCH1,LOXL1,MCM6,MTMR10,NFKBIZ,PCDH18,PDGFRL,POLA1,RHOBTB1,SAMD5,SDC2,SH3BP4,SH3D19,SLFN5,SULF1,TAGLN,TLE1,TP53,TPM1,TRNP1	722 (7)
SUZ12	-0.409	enzyme	Activated	2.173	2.32e-07	ABL2,ATP2A2,CALU,CBX6,CCPG1,CDC25A,CDH1,CDKN1B,CHRM3,CNTFR,CTNNA1,CYP26A1,DAB2IP,EIF4G3,EML4,EPCAM,EPHA1,FBXO32,FOXA1,FOXD2,GATA4,GATA6,HAND1,HAND2,HNRNPM,HOTAIR,HOXA10,HOXB2,HOXB5,HOXB8,HOXC11,HOXC12,HOXD10,HSD17B11,IGFBP3,ILF3,INSIG1,IRAK3,JAM2,LGALS3,LITAF,MAP7D1,MFN2,MMP2,MYT1,NKD1,NKX2-3,NKX2-5,PAX3,PAX6,PCDH10,PLAU,POU5F1,PPP2R2B,PTEN,RARB,RBMS1,SERTAD2,SFR1,SLC7A5,SMARCA4,SNX19,SRD5A1,SRP9…	1422 (13)
SIRT1	0.701	transcription regulator	Activated	4.05	2.34e-07	ABCA1,ABCB1,ACADM,ACTB,ANXA4,APLN,ARNT2,ATXN10,BBC3,BCL2L1,BCLAF1,BDNF,BIRC3,BIRC5,CAT,CAV1,CCNB2,CCND1,CCND3,CDH1,CDH2,CDKN1B,CDKN2B,CEBPB,CFLAR,CMIP,CMPK2,CPT1A,CREB1,CRYBG2,CTNNB1,CYCS,DBP,DDAH2,DDB1,DDX58,DDX60,DHX58,DKK1,EIF2S2,EP300,EPAS1,EPDR1,EPM2AIP1,ERMP1,ERO1A,EVPL,FAS,FBXO32,FCMR,FGF5,FGFR1,FGFR3,FN1,FOXC2,FOXO1,GADD45A,GATA4,GBP3,GBP6,GCK,GFPT1,GLI1,GLI2,GPAT4,HELZ2,HIF1A,HJURP,HK2,H…	2263 (16)
ciprofloxacin		chemical drug		-0.521	2.41e-07	ABCC4,ACO2,ACSL5,ACTN1,ADAM8,ALDH3B1,APP,ASAH1,ATP5F1C,ATP6V1C1,ATP6V1D,ATP6V1H,B4GALNT1,BMP4,CD47,COLEC12,CPD,CPNE1,CTSA,CTSD,CTSV,DNAJC13,DNAJC3,EDIL3,GBA,GLUD1,GRN,HLA-A,HSPD1,ICAM1,IGF1R,IGF2BP3,IL23A,ITGA9,LDLR,LRPAP1,MAN2B2,MAPK1,MMP2,MTHFD1L,MYBBP1A,MYOF,NRCAM,NRP1,PLXNB2,PSAP,RBM28,RPL10A,RPL12,RPL7A,RPS18,RUFY1,RUVBL1,SLC2A6,SPP1,SPRED1,SRPRA,STXBP1,TEX264,TTYH3,TUFM,UBTD1,VIM	855 (7)
NRAS	-0.394	enzyme		-0.273	2.41e-07	ACADM,AGRN,ANKRD1,ANXA4,B2M,BCL2L1,CCNB1,CCNB2,CCND1,CCNG1,CDC6,CDKN2B,CDKN3,CEACAM1,CENPA,CFH,CLEC11A,CRABP2,CRYBG1,CTNNB1,CTSE,CXCL2,CYHR1,DLX5,DUSP6,EGR1,EIF2D,ENPEP,EPAS1,ERCC5,ETS1,ETV5,EXO1,FBLN2,FHL1,FN1,FNDC3A,FOXM1,GALE,GBP2,HIF1A,HLA-A,HOMER3,HTRA1,IFI16,IFI35,IFIH1,IFIT1,IL13RA1,IL1A,IL1B,IL6,ISG15,ITGA2,KIF22,KRAS,LGALS1,LIMK1,MCL1,MCM3,MEST,MITF,MKI67,NCAM1,NCF2,NOL3,NQO1,OSBPL1A,PCB…	1537 (16)
Salmonella enterica serotype abortus equi lipopolysaccharide		chemical toxicant	Inhibited	-5.79	2.51e-07	ABL2,ADRB2,AREG,ATP1B1,BIRC3,CD274,CDK1,CDKN2B,CENPU,CFLAR,CSF2,CXCL1,CXCL2,CXCL3,E2F7,EDN1,EGR1,ELOVL7,EPM2AIP1,ETS2,F3,FERMT2,FLT1,FOSL1,G0S2,GADD45A,GADD45B,GBP1,GBP3,GLA,GPRC5A,HECW2,HES4,HEY1,HOMER1,HS3ST3B1,IFIT2,IL15RA,IL18,IL1A,IL1B,IL23A,IL32,IL36G,IL6,IL7R,IRF1,ISG15,KANK1,LAMP3,MAFF,MAP3K8,MBNL1,MCOLN2,MGLL,NEDD4L,NFKBIZ,NLRP3,NOCT,OASL,OSGIN1,PALM2AKAP2,PHLDA1,PHLDA2,PIM2,PIM3,PLAC8,P…	2047 (14)
RAS		group	Inhibited	-2.331	2.61e-07	ARG2,AURKA,B4GALT1,B4GALT5,BCL2L1,CAV1,CCK,CCN2,CCND1,CCND3,CD274,CDK6,CDKN1B,CDKN2B,CDX2,CLDN4,CSF2,CXCL8,CYP24A1,EDN1,EGR1,FN1,FOSL1,GBP2,GSTP1,HMGA1,HMOX1,IL11,IL1A,IL1B,IL24,IL6,IRF1,JUN,LDLR,LIF,LRAT,MET,MIR17HG,MITF,MMP2,MUC4,NFKB1,NOS2,NPM1,PAK4,PDCD4,PDGFA,PDGFB,PLAU,PLAUR,PML,POU3F2,PPARD,PRDM1,PRDX1,PSMD10,PTEN,PTGES,PTGS2,PVR,SERPINE2,SNAI2,SOD2,STAT1,STAT2,TFPI2,TGM2,TP53,UPP1,VEGFA,V…	1980 (15)
triptolide		chemical drug	Activated	2.349	2.67e-07	ABLIM3,ADM,AFAP1L1,AHR,APLN,BBC3,BCL2L1,BID,BIRC2,BIRC5,BMP6,CADM1,CASP3,CAV1,CDH1,CDH5,CDKN1B,CDKN2B,CXCL1,CXCL12,CXCL8,DACH1,DLL4,DUSP1,EFNA1,EFNB2,EMP1,ENG,ERBB2,F2RL1,FAS,FBLN5,FBN1,FLT1,FOXF1,GHR,HBEGF,HEY1,HILPDA,ICAM1,IER3,IGFBP2,IGFBP3,IL17RD,IL1A,IL6,ITGA1,ITGA2,ITGA6,ITPKB,JUN,KIT,LAMA3,LEF1,LIFR,MCAM,MCL1,MKI67,MMP11,NFKB1,OCLN,PMAIP1,PMP22,PTGS2,RECK,RHOC,SERPINB9,SMURF2,SOCS3,TJP1,TL…	1996 (16)
IL2		cytokine	Inhibited	-3.464	2.98e-07	ABCA1,ABCB4,ABCC1,ADAM19,ADAM8,ADCY3,ADCY9,AHR,ANXA1,ARAP1,AREG,ARHGAP1,ARHGAP11A,ARHGAP25,ARHGAP32,ARHGDIA,ARHGEF12,ARHGEF6,ARHGEF7,ARNT2,ATF5,BAG1,BBC3,BCL2A1,BCL2L1,BHLHE40,BIRC3,BMP2,C3,CAMK2N1,CAPG,CAPN5,CARD10,CARD6,CASP1,CASP3,CASP4,CCND1,CCND3,CCNE2,CCNG1,CD274,CD46,CD47,CD58,CD59,CD8A,CD9,CDC25A,CDC6,CDH1,CDK2,CDK6,CDKN1B,CEACAM1,CFLAR,CORO2A,CPD,CREB1,CRMP1,CSF1,CSF1R,CSF2,CTSC,CXCL12,C…	2113 (17)
RNY3		other	Inhibited	-4.264	3.21e-07	BATF2,DDX60,EPSTI1,HERC5,HES4,IFI44,IFI44L,IFIT1,IFIT3,IFITM3,ISG15,LAMP3,MX1,OAS1,OAS2,OAS3,OASL,RSAD2,RTP4,SPATS2L,TRIM6,XAF1	1176 (7)
mir-21		microRNA	Activated	2.229	3.41e-07	ANLN,ARCN1,ARF6,ATAD2,BMPR2,C1R,CACYBP,CANX,CARD6,CASP4,CCNB1,CCND1,CCT8,CD19,CD226,CD274,CDC25A,CDH1,CDH5,CDK6,CDKN2B,CKAP5,CLPB,COL1A1,COL3A1,COPG1,CREBBP,CSNK2A2,CXCL2,DBP,DDAH1,DDAH2,DHX58,DLGAP5,ECT2,EIF4E3,FAM3C,FAS,FN1,FUBP1,GBP2,GBP3,GBP6,GLCCI1,GSK3B,GTSE1,H2AX,HIPK3,HNRNPA2B1,ICAM1,ICOSLG/LOC102723996,IFI16,IL12A,IL12RB2,IL18,IL1B,IL36G,IL6,INPP5D,IPO11,IRAK1,IRF1,JAG1,JAK2,KIF23,KIF5B,…	1410 (15)
KLF3	-0.596	transcription regulator	Activated	2.404	3.45e-07	ABHD14B,ACOT11,ACOT9,AHNAK,ALDH3B1,ANXA6,AP4M1,APRT,ARFGAP2,ATF4,ATP2A3,BCL2L2,BCL3,C11orf24,C19orf44,CACNA1H,CAPG,CAPNS1,CBFB,CCT3,CD99L2,CDKN2D,CENPT,CEP170B,CEP63,CHCHD10,CMPK2,CTNNA1,CTSC,DEGS1,DFFA,DHRS7,DIAPH1,DOK3,DRG1,DYRK3,E2F2,E2F3,EIF2B1,EIF4E3,ELMO1,ELP1,EMID1,EPRS1,FMNL3,FRY,GAD1,GALNT1,GCNT1,GFI1,GLIPR2,GPD2,GPSM1,GRB7,GRK6,GSTP1,HEXB,HM13,HNRNPDL,HNRNPH1,HS3ST1,IFNLR1,IGF2BP3,INTS4…
IGF2		growth factor		-1.242	3.52e-07	AKT1,AREG,ARHGDIA,ARL4A,BIRC5,BMP2,CASP6,CCN2,CCND1,CDC45,CDC6,CDK1,CORO2B,CRY1,CTSV,CXCR4,CYP1B1,DHCR7,DLX1,DUSP1,EGR1,FN1,GADD45A,GAS1,GATA6,GHR,GNAI2,GNB1,GRN,HBEGF,HIF1A,IER2,IER3,IFITM2,IGF1R,IGFBP2,IGFBP3,IGFBP4,IGFBP5,IGFBP6,IL11,IL6,ITGA5,ITGB5,JUNB,KLF9,MCM5,MCM7,MEF2D,MMP11,MXI1,NFKBIA,NKX2-1,NOS2,PDCD4,PDGFB,PHLDA1,PIK3R1,PIM1,PRDM16,PSPC1,PTEN,PTGS2,RAD51AP1,RHOB,RNF13,RRM1,RRM2,RWDD4…	2239 (19)
TCR		complex		-1.85	3.56e-07	ABCD3,ABLIM1,ADM,AK2,AKT3,ARHGEF1,ATP5F1B,ATP5PB,BCL2A1,BCL2L1,BCL3,BIN1,BIRC3,CBL,CCND1,CCND3,CD6,CDH1,CDK2,CDKN1B,CFLAR,CREB1,CSF2,CTSB,CXCL11,CXCL8,CXCR4,CXCR5,DDX58,DHX58,EGR1,ELL2,EOMES,ETV5,FAS,FBL,FLNA,FYN,GADD45B,GBP4,GFI1,GLUD1,HERC5,HIF1A,HSD17B10,HSP90B1,HSPA5,HSPD1,ID3,IDH2,IFI44,IFI44L,IFI6,IFIH1,IFIT1,IFIT2,IFIT3,IFNGR1,IL12RB2,IL1RL1,IL24,IL4R,IL6,IL7,IL7R,IRF1,IRF7,ISG15,ISG20,JUN…	1854 (13)
PI3K (family)		group	Inhibited	-4.046	3.73e-07	ABCA1,ADM,BIRC3,BIRC5,CAT,CCND3,CD274,CDH1,CDKN1B,CDKN2B,CDX2,CFLAR,CTSD,CXCL1,CXCL11,CXCL12,CXCL8,CXCR4,EGLN1,EGLN3,FBXO32,FOXO1,FOXO4,FTH1,GCLM,GLI1,HIF1A,HK1,HMOX1,HSPA5,IFIT1,IL1B,IL6,ISG15,ITGA6,ITGB1,MCL1,MMP2,NFE2L2,NOS2,NQO1,PDGFB,PKM,PTEN,PTGS1,PTGS2,PXN,RDH10,RIPK3,SCARB1,SIAH2,SIRT1,SKIL,SLC2A1,SNAI2,TGM2,TJP1,TNC,TP73,TXNIP,VEGFA,WTAP,XIAP	1910 (14)
napabucasin		chemical drug		1.686	3.75e-07	ACTB,ALCAM,AXL,B2M,BIRC5,BMI1,CD24,CHEK1,CTNNB1,CXCL8,DACH1,DDR1,ENG,EPCAM,ERBB2,ETFA,FLOT2,GSK3B,HDAC1,HPRT1,ID1,IKBKB,ITGA2,ITGA4,ITGA6,ITGB1,JAG1,JAK2,LATS1,NFKB1,NOTCH1,NOTCH2,PLAUR,POU5F1,SIRT1,SMO,SOX2,STAT3,WEE1,WWC1,YAP1
Tcf7		transcription regulator		0.985	3.83e-07	ADAMTS6,ARHGAP20,ARHGEF12,ATP6V0A1,BCL11B,BMPR2,C3orf70,CDK1,CERK,CHCHD10,CHDH,CHEK1,CROT,CSF2,CTTN,CXCR5,ECM1,ELK3,EOMES,ETNK1,FDPS,FRMD6,FURIN,FYN,GM2A,GNAO1,GPD1L,GPD2,GSAP,HIF1A,HSD17B11,ID3,IFNGR1,IGF1R,IKZF3,IL15RA,IL1R1,IL7R,INPP5D,INPP5F,ITGB8,JAM2,KIF13A,KIT,KLF6,KLRG1,LDLR,LEF1,LONRF1,LPCAT2,LRIG1,LYN,LYSMD2,MAF,MAPK12,MAPKAPK2,MBNL3,MBOAT1,MSMO1,MXD1,MYD88,NCOA7,NFKB1,NR5A2,NR6A1,NRN1,…	2146 (15)
KLF6	-2.94	transcription regulator	Inhibited	-2.855	4.1e-07	BAK1,BCL2L1,BIRC5,CDH1,CDH2,CDKN1B,CGB3 (includes others),COL1A1,CXCL2,CXCL8,ENG,ESRRA,ESRRB,GLI1,IGF1R,IL12A,IL1A,IL1B,IL6,MCL1,MKI67,MSLN,NFKBIA,NOS2,NR1D1,NR1H2,NR2F1,NR4A1,OLIG2,PDCD1LG2,PLAU,PMAIP1,PPARA,PPARG,PRDM1,PSG5,PTCH1,PTGS2,RARB,RARG,SDC1,SERPINH1,TFPI2,TGFB1,TNFAIP3,TNIP1,TNIP2,VEGFA	1668 (13)
plicamycin		chemical drug		1.605	4.18e-07	ABCA1,AFAP1L1,AHR,AKT2,AVPI1,AXL,B4GALT5,BAK1,BBC3,CA9,CACNA2D3,CAMKK2,CCN2,CDC25A,COL1A1,CXCL1,DNM1,EGFR,EPS8,F3,FBXW7,FOXM1,FYN,GLTP,GNAI2,HIF1A,HMOX1,ID1,IER5,IGFBP4,MAOA,MET,MIF,MST1R,NAPA,NFE2L2,NGFR,PLAUR,PMAIP1,PRDM1,PRKCD,PRKDC,PTDSS1,ROR1,SEMA7A,SERPINE2,SETDB1,SIRT1,SLC40A1,SOCS3,STARD10,TESC,TGFBR2,TIMP1,TP53,TP73,TYMP,UBC,VDR,WNT9A,WWC1,ZMYND8	2446 (22)
RUNX3	-2.329	transcription regulator		1.702	4.23e-07	ABCC1,AKT1,ASPH,BBC3,BIRC5,CCN1,CCN2,CCND1,CDX2,CFLAR,CHST14,CHST3,COL12A1,COL4A1,COL4A4,CPVL,CRIM1,CXCL8,DIP2C,EOMES,EXT1,FBN1,FGF2,FGF9,FLNA,FMN2,FZD2,GLI2,GRK5,IL18,IL1B,IL6ST,ITGB5,JAG1,KCTD15,KHDRBS3,LIFR,LOX,MACF1,MMP2,NAP1L5,NEGR1,PARVA,PCDH7,PTPN21,RASAL2,REEP1,RHOBTB1,RHOBTB3,RNF150,RTN1,RUNX1,SCARA3,SLIT2,SNAI2,SPP1,SPRED1,ST3GAL5,STC2,TEAD1,TGFB1,TGFB2,TIMP2,TLCD4,TPM2,UGCG,VIM,WT1,ZNF…	2245 (22)
RASSF1	0.339	other		-1.161	4.33e-07	ABCB1,AMIGO2,AREG,BHLHE40,BMPR2,CASP3,CASP4,CAV1,CAV2,CCND1,CDH2,COL13A1,COL4A1,COL4A2,CRABP2,CRIP2,CXCR4,DACH1,DKK1,EFEMP1,EFNB2,EGFR,EGR1,EMP1,EPB41L3,FGF2,GDF15,GHR,GSN,HBEGF,IGFBP3,KLF10,LIF,LITAF,MAP1B,MMP2,MRAS,MYL9,PAK1,PCDH7,PLK2,PTGS2,RASGEF1A,RNF182,SAMD5,SELENOP,SOX9,SPP1,TBK1,TGM2,TMEM158,TP53INP1,TUBB2B	2107 (18)
miR-200b-3p (and other miRNAs w/seed AAUACUG)		mature microRNA		0.385	4.34e-07	BAP1,CDH1,CDKN1B,ELMO2,EPCAM,ERBIN,ERRFI1,FHOD1,FOXF2,GEMIN2,GJB3,GRB7,GSE1,JAG1,KCNK1,KLHL20,LSR,MARCKS,MSLN,PERP,PPM1F,PTEN,PTPN12,PTPRD,RHPN2,RNF128,VEGFA,VIM,WASF3,ZEB1,ZEB2
miR-34a-5p (and other miRNAs w/seed GGCAGUG)		mature microRNA		1.574	4.36e-07	AHCYL1,APP,ARHGEF12,AXIN2,AXL,B4GALNT1,BIRC5,BVES,CACHD1,CCN5,CCND1,CD47,CDC25A,CDK1,CDK6,CREB1,DHFR,DPYD,E2F1,E2F2,E2F3,E2F5,EFEMP1,EFHD1,ETS2,FAM110C,FCMR,GALNT2,GFRA1,GPR155,HAPLN3,HDAC1,ICAM1,IFITM2,IKZF3,JAG1,KDM7A,LGALS3BP,MAP2K1,MCM10,MCM3,MET,MVB12A,NOTCH1,NOTCH2,PFN2,PIK3CB,PLAAT4,PLCB1,POU3F2,POU5F1,PPARG,PPM1H,PREX2,PTCH1,PTEN,PTPRE,SAMD9L,SERPINB8,SHISA2,SIRT1,SLCO3A1,SOX2,SPINT2,TAF7…	2172 (19)
NFYB	-0.638	transcription regulator			4.39e-07	ACLY,ACTB,APOBEC3B,ARHGAP11A,ARID4B,ATP5F1B,BCL11B,BCL2L1,BRD2,CACNA2D3,CAPN12,CAV1,CBS/CBSL,CBX5,CCDC174,CCNB1,CCNB2,CCSAP,CDC25A,CDCA8,CDH1,CDH2,CDK1,CDS2,CENPF,CEP57L1,CHEK2,CHPT1,CHRNB1,CLDN15,COL1A1,CTNNB1,DTL,DZIP3,EIF3C,ELAVL1,EMX2,EMX2OS,ENTPD7,EPAS1,F8,FAM214B,FAS,FBXL18,FRYL,FTH1,GADD45A,GALNT2,GAPDH,GART,GAS2L1,GDF6,GGPS1,GLA,GLIDR,GNA12,GOLGA6L9 (includes others),GPAM,GRK3,GTF2H2,H2AJ…
hydrogen peroxide		chemical - endogenous mammalian	Inhibited	-2.69	4.49e-07	ABCB1,ADAM17,ADAM9,ANKRA2,ANKRD1,ANXA2,APP,AURKA,BAD,BAG4,BAK1,BBC3,BCL2A1,BCL2L1,BIRC3,BIRC5,CASP1,CASP3,CAT,CAV1,CBX5,CCN2,CCNB1,CCND1,CCND3,CCNF,CD59,CD63,CD81,CDC34,CDC6,CDH1,CDH13,CDK1,CDK2,CDKN1B,CFD,CFLAR,CHEK1,CKS1B,CLDN7,COL1A1,COX6C,CREBBP,CSF1,CST3,CTNNB1,CTSB,CTSD,CTSS,CUX1,CXCL3,CXCL8,CXCR4,CYCS,DDAH2,DDX52,DHCR7,DHFR,DKK1,DPAGT1,DUSP1,DUSP10,DUSP16,DUSP4,DUSP8,EDN1,EGFR,EGR1,ENC1,EN…	2365 (17)
E2F3	0.857	transcription regulator		0.085	4.63e-07	AKNA,AKR1C3,ARPC1A,BAIAP2L1,BIRC5,BMI1,BOK,C1orf198,CASP7,CAV2,CCNA1,CCNB1,CCNB2,CCND1,CCND3,CD9,CDC25A,CDC45,CDC6,CDCA3,CDK1,CDK2,COL18A1,CTNND1,CXCL1,DHFR,E2F1,E2F2,E2F3,ECE1,ECHDC2,EDN1,ELF3,FAM102A,FBLN5,FBXO5,FGF2,FST,H2AW,H2BC15,HOXB9,HSPD1,ID3,JAM2,KRAS,KRT80,L3MBTL4,LAMA4,LBR,LPL,MAL2,MCM10,MCM3,MCM5,MCM6,MCM7,MIR17HG,MLH1,MT1F,NEAT1,NECTIN1,NPAT,NUCKS1,PDS5A,PLK1,POLA1,PPP1R13B,PPP1R8,PT…	2086 (19)
INS		other		-1.807	4.73e-07	ACADL,ACADM,ACADVL,ACLY,ADAM10,ADCYAP1R1,ADIPOR1,ADM,AQP3,ASPH,BCL2L1,CAT,CBS/CBSL,CCN1,CCN2,CCND1,CDH1,CEBPB,CPT1A,CRABP2,CUL5,DEPTOR,DUSP1,EDN1,EGR1,EIF4EBP1,ERBB3,ERRFI1,F3,FADS3,FAS,FOSL1,FOSL2,FOXO1,GCK,GPAT4,GRB10,HIF1A,HSPA5,ICAM1,IER2,IER3,IGF1R,IGFBP2,IGFBP3,IGFBP4,IGFBP5,IL6,INSR,IRS1,IRS2,JUN,JUNB,LPL,NDUFV1,NFE2L2,NR1H3,NR4A1,OGT,PIK3C3,PLIN2,PLK2,PPARG,PPARGC1A,PRDM16,PTGS1,PTGS2,PTP…	2135 (18)
HTT	0.689	transcription regulator	Inhibited	-2.256	4.88e-07	ABCA1,ACADM,ACOT2,ACTN2,ADAM23,ADAMTS2,AGRN,AKT1,AKT2,ANTKMT,AP1S1,APP,ARHGEF7,ARPP19,ATP2A2,ATP2C1,ATP5F1B,ATP5MC1,ATP6V0E1,ATP6V0E2,ATP8A1,ATPAF1,ATPAF2,AZIN1,B2M,B3GNT2,B4GAT1,BAIAP2,BASP1,BBC3,BCAP31,BCL11B,BCL3,BDNF,BHLHE40,BID,BIRC2,BMP1,BMP3,BTG3,C1R,CACNA2D3,CAMK2B,CAMK4,CANX,CASP1,CASP3,CAST,CBX5,CCK,CCN2,CCND1,CD9,CDH8,CDK2,CDK2AP1,CDK5,CEBPB,CHKA,CLDN1,CLOCK,COCH,COL16A1,COL18A1,COL4A1…	2314 (19)
EIF4E	-0.149	translation regulator	Inhibited	-2.46	5.16e-07	ADAMTS15,ATR,BAD,BAK1,BCL2L1,BCLAF1,BIK,BIRC2,BIRC5,CAPG,CAPZB,CBLC,CCND1,CDC34,CDK2,CDT1,CEBPB,CHMP1A,DAXX,DPYD,EGFR,EIF4EBP1,EP300,FBXW2,FGF2,FGF5,FN1,FOSL1,FREM2,GPX3,GRB2,HIF1A,HMOX1,HOXC10,IGFBP4,IL15RA,IL18,IL1A,ILF2,INSIG1,KLF13,LSM1,LSM4,LSM7,MAPKAPK2,MCL1,MPV17,NFKBIA,NHP2,NOL3,NOP10,NOS2,NRP1,NUDT3,PA2G4,PDS5B,PHF5A,PIM1,PLAUR,PNKP,POLR3D,POP7,PRDX5,PRPS1,RB1,RPL10A,RPS13,SASS6,SERTAD1,…	2142 (19)
CD 437		chemical drug		-1.464	5.26e-07	AK2,AKR1B1,AMH,AP2M1,AP2S1,APC2,ARF1,ARHGDIB,ARPC2,ARPC3,ARSA,ATP5F1B,ATP5F1C,ATP5MC3,ATP5PF,CCT3,CEBPB,CLIC1,COX6C,COX7B,COX7C,E2F1,EEF2,EIF3D,EIF3G,EIF3I,EIF4A2,EIF4B,F3,FAS,FKBP5,FTH1,FTL,GADD45A,GDF15,HIC1,HLA-C,HMGB1,HNRNPA1,HNRNPC,HSPA8,ILF2,IMP3,ITM2B,JUN,LGALS1,LSM3,MAN1B1,MEN1,MGST1,MOB1A,NACA,NARS1,NFKBIA,NKX2-5,NOP10,NPM1,NR4A1,PABPC1,PDIA3,PFN1,PLP2,PNPLA6,PSMD3,PSMF1,PURB,RASL10B,RBM…	1659 (15)
NANOG		transcription regulator		1.451	5.56e-07	ABCB1,AHR,AMER1,BIRC5,CDC25A,CDK6,CNOT7,COL3A1,DLX1,DLX4,DLX5,E2F1,EGR1,EN1,EOMES,ESRRB,ESX1,FGF5,FOXD3,FUS,GATA4,GATA6,GCK,GLI1,GSC,HNRNPH1,HOXB3,HOXC4,HSPA1A/HSPA1B,IER5L,IFNGR1,IGF1R,ISL1,JARID2,KDM4B,LAMA1,LBX1,LGALS1,LHX2,LPCAT4,LYN,MAP1B,MAX,MIXL1,MTF2,NKX2-1,NKX2-2,NKX2-3,NPIPA1 (includes others),NPTX1,NRIP1,NSUN5P2,PAX6,PDCD4,PDX1,PHACTR2,PHKG2,POLE4,POU5F1,SMARCC1,SOX2,SRRT,TBX3,TET1,TET…	1972 (13)
RC3H1	-0.023	enzyme	Activated	5.513	5.62e-07	ACTB,APOBEC3B,BST2,CLDN1,CXCL2,DDX58,EDN1,FOSL1,HSPB1,IFI16,IFI27,IFI44,IFI44L,IFI6,IFIT1,IFIT2,IFIT3,IFITM1,IFITM3,IL1A,IL1B,IL6ST,IRF1,IRF9,ISG15,MT2A,MX1,NRP1,OAS1,OAS2,OAS3,PARP9,PLSCR1,RSAD2,SDC1,SHFL,SPP1,STAT1,STAT2,TNFAIP3,TRIM21,TRIM25,TRIM56,WNT5A	2127 (14)
COL4A3	6.096	other		1.987	5.7e-07	CCN2,COL1A1,COL3A1,COL4A1,COL4A2,COL4A4,COL4A5,DDR1,FN1,ITGA2,LAMA1,LAMB1,LAMC1,MAPK14,MMP14,MMP2,PTGS2,TGFB1,TIMP1,TIMP2	1628 (15)
troglitazone		chemical drug		1.34	6.27e-07	ABCA1,ABCA12,ABHD2,ACADM,ACADS,ACOT2,ACOX1,ACSL1,ADIPOR1,AGTR1,AK2,ANGPTL4,ANXA2,AQP3,ARHGEF19,ATP2B1,AXIN2,BAD,BAK1,BCL2L1,BIRC3,BIRC5,BMP1,C3,CARS1,CAV1,CAV2,CCDC74B,CCK,CCNB1,CCND1,CCND3,CCNJ,CD59,CDC25A,CDCA7L,CDH1,CDK2,CDKN1B,CEBPD,CEP135,CEP70,CFD,CFL1,CFLAR,CHCHD10,COL1A1,COL4A1,CPT2,CREB1,CSF2,CTNNAL1,CTNNB1,CXCL1,CXCL11,CXCL3,CXCL8,DGAT1,DGAT2,DGKA,DHRS3,E2F1,E2F2,ECT2,EEF1AKMT2,EGFR,EGL…	2173 (18)
erlotinib		chemical drug	Inhibited	-3.831	6.36e-07	AREG,AXL,BAK1,BBC3,BCL2L1,BTC,CAMLG,CD14,COL8A1,CSF2,CXCL1,CXCL3,CXCL8,EGR1,ENAH,F3,FAS,FBN1,FGF2,ICAM1,IGFBP4,IGFBP6,IGFBP7,IKBKB,IL11,IL15,IL1A,IL1B,IL6,IRAK4,LIF,MME,MMP14,MYD88,NFATC1,NFKB2,NFKBIA,NOX5,PDGFB,PLAU,PLAUR,PML,PTEN,RELB,SERPINB2,TAB1,TAB3,TGFA,TIRAP,TLR2,TNFRSF10A,TNFRSF13C,TNFRSF1A,TRADD	1905 (13)
SB203580		chemical - kinase inhibitor	Activated	6.049	6.74e-07	ACOT2,ACOX1,ADAMTS9,ADRB2,AK7,ALOX5AP,ALPL,AMH,AMOTL2,ANXA1,ANXA3,APOBEC3B,ARHGDIB,BBC3,BDKRB1,BIRC5,BMP2,BMP4,BPGM,BST2,C3,CASP10,CCK,CCN2,CCNB1,CCND1,CD109,CD207,CD274,CD2AP,CD47,CDH1,CDH2,CDK1,CDKN1B,CEACAM1,CEBPB,CEBPD,COL1A1,COL3A1,CREB1,CSF2,CTSH,CXCL1,CXCL11,CXCL2,CXCL3,CXCL8,CYP1B1,DCHS1,DKK1,DUSP1,EFEMP1,EFNA1,EGR1,EIF2AK2,ELOVL7,ETS2,F3,FAS,FDFT1,FLT1,FN1,FOXQ1,GADD45A,GBP2,GBP4,GK,GLIP…	1761 (13)
gemcitabine		chemical drug	Inhibited	-2.18	6.9e-07	AQP3,AREG,BCL2L1,BIRC5,CCNB1,CCND1,CD24,CD274,CD47,CDC25A,CDKN1B,CXCL12,CXCR4,DCK,DCTN4,EGR1,ERBB2,FAS,FOSL1,HIF1A,HMOX1,IL1B,IL23A,IL32,MICA,NOTCH1,NT5E,PEBP1,PKM,PRKDC,PTGS1,PTGS2,RIPK3,SRSF1,TGFA,TP53,TP73,VEGFA,VMP1,WT1,XIAP	1997 (18)
SOX3	7.295	transcription regulator		0.885	6.96e-07	ACVR1,APCDD1,AXIN1,CDX2,CHST15,CITED1,COBLL1,CTNNB1,CYP26A1,DSP,DUSP1,DUSP4,DUSP5,ECSIT,EFEMP1,EOMES,EPHA2,EXT2,FARP1,FGF5,FOXF1,GBP3,GBP4,GREB1,HAND1,IER5,IRS1,KIF16B,LMX1B,NCKAP1,NRP1,PCDH18,PITX2,POU4F1,PPP2CA,SOX2,SOX9,TEAD1,TEAD2,TGFB2,TNFRSF19,TWSG1,VEGFA,WLS,WNT3,WNT5A,YAP1,ZBTB16
BCL6	-0.479	transcription regulator	Activated	2.442	6.99e-07	ADCY9,ALCAM,ANXA6,BCL2A1,BCL2L1,BCL3,BMI1,BMP2,CASP3,CCND1,CD19,CD274,CDKN1B,CDKN2AIP,CGAS,CHEK1,COL1A1,COL2A1,CPD,CSF1,CSF2,CUX2,CXCL2,CXCL3,CXCR5,DNAJB11,DUSP6,FAS,FGF2,FTH1,GABPB1,GADD45A,GLI1,GLI2,GOLM1,HDAC9,HERC5,HERC6,HOXD9,IL12A,IL13RA1,IL18,IL1A,IL1B,IL23A,IL24,IL4R,IL6,IL7,IL7R,IRF1,IRF8,IRF9,ITGA3,ITPRIP,JUNB,KLF6,KLHL23/PHOSPHO2-KLHL23,LBH,LDLR,LITAF,LMNA,LPP,MAF,MAPK6,MCM3AP,MIR155HG…	1227 (14)
thioacetamide		chemical toxicant	Inhibited	-5.2	7.26e-07	AACS,ABCC4,ACOT2,ACP5,AKR1C3,ANXA1,ANXA2,ANXA4,ARG2,BGN,BHLHE40,BIRC3,BLM,BRCA2,BRIP1,CCN2,CD14,CHAF1A,CHAF1B,CKB,CLDN4,CLIP2,COL1A1,COL3A1,CTSF,CYGB,DAB1,DBN1,DKK3,EHD3,ELF3,EMP1,ERBB2,FBLN5,FBN1,FGB,FGFR3,FXYD6,GATM,GDE1,GPX3,GTPBP4,GYG1,HDGFL2,HIF1A,HK1,HSD17B1,HSPA4,IER3,IFITM2,IGFBP3,IL1B,IL6,ITGA7,JUN,KLRG1,LGALS1,LGALS3,LGALS3BP,LIN7A,LOX,LRAT,LRP8,LTBP1,LXN,MBD4,MCM3,MCM6,MET,MLXIPL,MMP14…	2258 (16)
DNMT3A	-0.062	enzyme		-1.625	7.74e-07	ACSL1,ADAMTS9,ADCY7,APLN,BRCA2,CACNA1C,CASP4,CASP6,CD19,CDH1,CSF1R,CXCR4,DNMT3B,E2F1,E2F2,ECEL1,EFEMP1,EMX1,ERO1A,ETV5,EXO1,FGF2,FOXA1,FOXF2,FOXO1,FURIN,GNAO1,GPER1,GRB2,GRINA,GRK3,GSS,GUCY1A1,IRF1,IRF5,IRF8,IRS1,ITGAV,ITPR3,LAMC3,LRP2,MAPK13,MLH3,MUC4,MYL9,MYT1,NFATC3,NQO1,NR4A1,P2RY1,PAK6,PDE2A,PLA2G7,PLK2,POU5F1,PPP3R1,PRDM2,PRKAR2B,PRKCI,PTEN,PTGS1,PTGS2,RAP2B,RCAN2,RECQL4,RRAS2,RYR2,SALL3,SD…	2063 (20)
nocodazole		chemical reagent		-0.276	7.81e-07	AKT1,AURKA,CAV1,CCNB1,CCND1,CDK1,CDK7,CDKN3,CFLAR,CHFR,CHTOP,DUSP4,FLNA,FYN,GRK3,GSK3B,HIF1A,KHDRBS1,LATS2,MAP2K1,MAP2K2,MAP3K8,MAP4K1,MAP4K2,MAPK1,MAPK12,MAPK3,MAPK4,MCL1,NOTCH1,PAK3,PIM1,PLK1,PPM1D,PPP1CA,PPP1CC,PPP2CA,PPP4C,PRKD1,PTGS2,PTPN1,PTPN11,PTPN12,PTPN6,RAF1,RPS6KA1,RPS6KB1,SRC,STK3,STK4,TP53,YES1	2083 (17)
RB1	-0.341	transcription regulator		0.782	7.91e-07	ACO2,ACTB,ACTN2,ADAM10,AKT1,ALG5,ALPL,ATAD2,ATP1B1,ATP6V1D,ATR,BAK1,BIRC5,BLM,BTG3,CAP1,CASP3,CASP4,CASP6,CASP7,CASP8,CBX5,CCN2,CCNA1,CCNB1,CCND1,CCND3,CCNE2,CDC25A,CDC6,CDCA7L,CDH1,CDK1,CDK2,CDKN1B,CDT1,CDX2,CELSR1,CENPK,CHAF1A,CHRNB1,COL4A1,COL4A2,COL5A1,COQ7,COX17,CPA4,CSF2,CXCL2,CXCL3,CXCL8,CYP27B1,DCK,DCTN4,DDB2,DHFR,DPP3,E2F1,E2F2,E2F3,E2F5,E2F7,EGR1,EHD3,EIF2S1,EOMES,EPS8,EZR,F3,FAM111A,FA…	2127 (20)
IRF1	-3.084	transcription regulator	Inhibited	-7.012	8.09e-07	ADAM8,APOL6,B2M,BAK1,BRIP1,C1R,CASP1,CASP3,CASP7,CASP8,CCNB1,CCND1,CD274,CDK2,CEACAM1,CMPK2,CTSS,CXCL11,CXCL16,CXCL2,CXCL3,CXCL8,DDX58,DST,E2F1,E2F3,EIF2AK2,ERAP1,GBP2,HELZ2,HOTAIR,IFI27,IFI35,IFI44,IFI44L,IFI6,IFIH1,IFIT1,IFIT2,IFIT3,IFIT5,IFITM1,IFITM3,IL12A,IL12RB2,IL15,IL18,IL1B,IL6,IL7,IRF1,IRF2,IRF5,IRF7,IRF9,ISG15,JAK2,LIG4,MAP4K4,MX1,NOS2,OAS1,OAS2,OAS3,OASL,PCDH7,PDCD1LG2,PLAAT3,PLAAT4,P…	1431 (14)
Mek		group		-1.233	9.02e-07	AXL,BCL2L1,BID,BIRC5,CCN2,CCND1,CCND3,CDCA7,CDH1,CDKN1B,CDX2,CSF1R,CTNNB1,CXCL11,CXCL8,DDR1,DDR2,DDX58,DNMT3B,DUSP4,DUSP5,DUSP6,EGR1,EPAS1,EPHA2,EPHB2,ERBB2,ERBB3,ETS1,ETV4,ETV5,FGFBP1,FGFR1,FOSL1,FOXD3,GBP2,GDA,GDF15,GNL3,GPER1,HAND1,HAS2,HIF1A,HOMER1,HRH1,HSPB1,ID1,IER2,IER3,IL15,IL1B,IL6,IRF1,ITGA6,ITGB1,JUN,JUNB,LRP8,MAF,MAFF,MANSC1,MCL1,MMP14,MMP2,MST1R,NEUROG2,NOL3,NOP58,NQO1,NR1H3,NR4A1,OT…	1537 (16)
Alpha catenin		group	Activated	3.051	9.05e-07	ADAM8,ADAMTS2,AREG,AXIN2,BCL2L1,BCL3,BGN,BIRC3,C1QTNF2,CDKN1B,COL1A1,COL3A1,COL5A1,COL6A1,COL6A2,CTSB,CTSV,CXCL12,CXCL2,DIAPH1,DKK1,ELK3,ENG,EPGN,EPHA3,ICAM2,IGFBP2,IGFBP4,IGFBP6,IGFBP7,IL1B,IL36G,IL6,IL6ST,IRF1,ITGA5,KRT6B,LAMA4,LEF1,LUM,LYN,MMP11,MMP2,NFKBIA,NFKBIZ,NKD1,PLAU,PTGS2,RELB,RHOC,SAA1,SGK1,SOCS3,STEAP4,TGM2,THBS2,TIMP1,TNC,TNFAIP2,TNFAIP3,TNFRSF12A,TWIST1,VIM,WIPF1,ZEB2,ZYX	1873 (14)
MAPK7	0.165	kinase	Inhibited	-3.093	9.54e-07	ADRB2,BCL2A1,BCL2L2,BDNF,CCND1,CDH2,CDKN1B,CXCL2,CXCL3,CXCL8,DUSP1,EDN1,HMOX1,ID1,IL1A,IL1B,IL6,JUN,MCL1,MEF2C,MEF2D,NQO1,NR4A1,PDE3A,PTGS2,SEMA3F,SERPINB2,STEAP4,THBD,TP53,TRAF4,VEGFA,VIM	1751 (12)
Histone h3		group		0.555	9.9e-07	ABCB1,ADAM10,ADD2,ADGRA2,ADGRB1,AP1S3,ARHGEF17,ASCL2,B2M,BAHCC1,BBC3,BDNF,BIRC5,BMP4,BTG3,CA9,CACNA1G,CAV1,CCNB1,CCND1,CD9,CDC6,CDH1,CDKN1B,CDKN2B,CDX2,CEACAM1,CFLAR,CHFR,CKAP4,COL4A6,CRIP2,CSF1R,CTNNA1,CTNNB1,CXCL8,DAB2IP,DKK1,DUSP10,DUSP16,E2F1,EFCAB7,EFNA1,EGR1,EML5,EOMES,EPHB3,ERMAP,FGF5,FGFR1,FKBP5,FLT1,FOXA1,FOXM1,G6PD,GAD1,GAPDH,GATA2,GATA4,GATA6,GCNT4,GFI1,GHR,GKAP1,GLI1,HAND1,HOXA10,HOXA…	2117 (17)
PTH		other	Inhibited	-2.361	1.07e-06	AHNAK,ALPL,ANK3,AREG,ARFGEF2,ATP2A2,BHLHE40,BMP2,CARD14,CCN2,CCN5,CCND1,CDKN1B,CEBPB,CGNL1,COL1A1,COL2A1,CSF1,CTNNB1,CXCL12,CXCL2,CXCR4,CYP24A1,CYP27B1,DISC1,DUSP1,EFNB2,EGFR,EIF4B,FN1,FOSL2,GALNT3,GNG12,GOLGB1,HSPA5,ID4,IGFBP3,IGFBP5,IL11,IL6,ITGAV,JUN,KIF26A,LEF1,LIMA1,LMNA,MME,MMP2,MSX2,MTFR1L,NR4A1,PALM,PDGFA,PHLDB2,PLAU,PLXDC2,PPP1R1A,PPP2R5D,PTGS2,PTHLH,PUM1,PXN,RBM14,RMDN3,RUNX1,RUNX2,SDC4…	1534 (15)
SMAD7	-1.435	transcription regulator	Activated	2.62	1.11e-06	ACVR1,ACVR2B,ADAMTS2,AREG,BGN,BIRC2,BMP2,BMP7,BMPR2,CCN2,CCNB1,CDH2,CDK1,CDKN1B,CDKN2B,CFLAR,CGREF1,COL1A1,COL2A1,COL3A1,COL6A1,CXCL12,DEPTOR,DNMT3B,EFEMP1,EIF4EBP1,FAS,FGF5,FN1,FOXO1,FST,FSTL3,FURIN,GADD45A,GAS6,GATA4,HBEGF,HDAC9,HMOX1,ICAM1,ID1,ID3,IL1B,ITGA6,ITGA7,ITGBL1,KRT8,LTBP2,LTBP3,MATN2,MET,MMP2,MUC4,NET1,NFKBIA,NID2,NOS2,PITX2,PMEPA1,POU5F1,RAC1,SEMA3F,SLC5A5,SMAD3,SMAD7,SOX2,SOX9,TAGL…	1351 (15)
TREM1	0.34	transmembrane receptor	Inhibited	-3.107	1.18e-06	ABL2,ADRB2,AREG,ASPH,ATP1B1,CD14,CD274,CDK1,CDKN2B,CEBPB,CENPU,CSF1,CSF2,CXCL1,CXCL2,CXCL3,CXCL8,CXCR4,DTL,DUSP14,DUSP4,E2F7,EDN1,EGR1,ELOVL7,EPM2AIP1,ETS2,F3,FERMT2,FNDC3A,FOSL1,GADD45B,GCLM,GLA,GPRC5A,HBEGF,HECW2,HES4,HOMER1,HS3ST3B1,HSD3B7,IFIT2,IL15RA,IL1B,IL1R1,IL1RL1,IL23A,IL36RN,IL6,IRF1,ISG15,KANK1,LAMP3,LIF,LPL,MAFF,MAP3K8,MCOLN2,MFN1,MFN2,MOAP1,MT1E,MT1F,MYD88,NEDD4L,NFKB2,NFKBIA,NPC1,N…	1450 (12)
PELP1	0.913	other		-0.507	1.18e-06	ADA,ADRB2,AFF2,AHNAK2,ARMCX1,AUTS2,B3GALNT1,BAD,BCL2L1,BMP2,CASP10,CCNA1,CCND1,CDC42EP5,CDK2,COL12A1,CPNE1,CTSH,CXCL1,CXCL8,CYGB,DOCK11,EDEM2,EGFR,EPDR1,FBN2,FGFR3,FMN2,FOXQ1,FYN,G0S2,GREB1,IFI44,IGF2BP3,IKBKE,IL1A,IL1B,KRT34,KRT81,KYNU,MAP1B,MAPK4,MLPH,MMP2,MRAS,MYADM,NCOR2,NIBAN1,P3H2,PI3,PPARG,PPARGC1A,PRMT6,PSAT1,PTEN,PTGES,PTGS2,PTK6,RAB5IF,SAA1,SNCG,SRC,SRSF12,TAGLN,TCN2,TGM2,TRPC4AP	2038 (17)
ETV5	-3.012	transcription regulator		-0.339	1.28e-06	AGRN,AHNAK,ALCAM,BEX1,CAV1,CAVIN1,CCND1,CDH1,CDH2,CLDN1,CLDN16,CLDN4,CLDN7,CLIC5,CTNNA1,CTNNB1,CXCL12,CXCR4,ETV5,FN1,FOXM1,FXYD5,GALNT3,ICAM1,ICAM2,ITGA5,ITGB1,KRT23,KRT80,LAMP3,LGALS3,LMO7,MAF,MET,MID1IP1,MMP14,MMP2,MSN,NCAM2,NRCAM,PKP2,PKP4,PMP22,QKI,RAB27A,SAMHD1,SCARB1,SNAI2,SOAT1,SPP1,TIMP3,TJP1,TWIST1,VEGFA,WWTR1,ZEB1	979 (11)
CHUK	-0.055	kinase	Inhibited	-3.947	1.28e-06	AMPD3,BCL2L1,BMP2,C3,CASP4,CCNB1,CCND1,CDC25A,CDH13,CDKN1B,CEBPB,CEBPD,CLDN1,CLDN23,COL18A1,CSF1,CSF2,CTSB,CTSF,CTSZ,CXCL12,CXCL2,CXCL3,CXCL8,DUSP6,E2F1,EN2,ENAH,ENPP2,F3,FAS,FOXC2,FOXF2,GADD45B,GBP2,GBP3,GBP4,GM2A,GRN,HES6,HEY1,HEY2,HK2,HLA-A,HMOX1,ICAM1,IFI16,IFI35,IFIT2,IGFBP6,IL11,IL1A,IL1B,IL6,ISG15,ITM2B,JUNB,KCNH2,KLF10,KLF5,LIFR,MMP2,MXD1,NAGLU,NFKB2,NFKBIA,NID1,NOCT,NOTCH1,NR6A1,NUMB,OVO…	1740 (11)
BMP7	6.384	growth factor		1.282	1.29e-06	ACVR1,AKT1,ALDH1A2,AP2A1,BIRC5,BMP1,BMP2,BMP4,BMP7,BMPR2,CALD1,CAMK2N1,CAV2,CD207,CDH1,CDH2,CEBPB,CEBPD,COL1A1,CXCL8,CYCS,DKK1,DLX5,DSC2,DSP,EDN1,EGFR,EPCAM,ERBB3,F11R,F3,FN1,FOXC2,FZD7,GRB10,GRB14,GRB2,GSC,ICAM1,ID1,IGF1R,IGFBP3,IGFBP4,IGFBP5,IGFBP6,IL1B,IL6,IRS1,ITGA5,ITGAV,JAG1,MAPK3,MMP2,MSN,MST1R,MSX2,MYO1C,NCAM1,OCLN,PAX2,PAX6,PCSK6,PIK3R1,PPARG,PPARGC1A,PPARGC1B,PRDM16,RNF111,RUNX2,S100A4,…	1374 (16)
let-7	0.638	microRNA		-0.042	1.32e-06	APC2,ARID3A,AURKA,BCL11A,BCL2L1,BDNF,BOP1,BRCA2,CASP3,CBFB,CCNB1,CCND1,CCNE2,CCNF,CCNJ,CDC16,CDC23,CDC25A,CDC34,CDC45,CDC6,CDCA3,CDCA7,CDCA8,CDH2,CDK1,CDK6,CDK8,CDT1,CEBPD,CHEK1,CKS1B,COL1A1,COL24A1,COL3A1,DMD,DNAJB9,DUSP6,DZIP1,E2F2,E2F5,ERO1A,FANCD2,FARP1,FBL,FN1,FOSL1,GALE,GMNN,GPX7,GREB1,GZF1,HK2,HMGA1,IGF1R,IGF2BP1,IGF2BP2,IL6,IRS2,ITGA1,ITGA4,KRAS,LEF1,LIN28B,LRIG1,MAPK6,MCM10,MCM3,MCM5,MCM…	1635 (17)
WBP2	-0.537	transcription regulator		1.077	1.34e-06	ADAMTS14,ADAT2,ADRM1,ALOXE3,AQP3,AXIN2,BMP4,BSDC1,C16orf87,CASP7,COL4A1,COL4A6,COLEC12,COLGALT2,CORO1C,CTH,CTNNB1,CXCL1,CXCL2,CXCL3,CXCL8,CYP24A1,DCLK1,DHX34,EGR1,FCMR,FHL1,FOXQ1,GK5,GLCCI1,HAS2,HHIP,HNMT,HSD17B10,IL1B,IL23A,ISYNA1,JDP2,JUN,KIFBP,KRT86,KRTAP2-3/KRTAP2-4,LEF1,LGR5,LIPG,MAPRE3,MBOAT1,MOB3A,NECTIN1,OSCP1,PEG10,PIMREG,PTGS2,RIMS3,RMND5A,SFXN3,SIGMAR1,SLC10A3,SLC1A3,SLC7A11,STX3,SYNM,…	2132 (15)
E. coli serotype 0127B8 lipopolysaccharide		chemical - endogenous non-mammalian	Inhibited	-4.008	1.42e-06	ACSS1,ADGRG2,AIF1L,ANXA1,BDNF,BRIP1,CASP6,CASP8,CAV1,CCN2,CD14,CHST11,CHST8,CXCL12,CXCL16,CXCL2,CXCR4,DERL1,DERL2,DNAJC3,DOK1,F2RL1,FGF2,FZD2,GDNF,GNA13,GNAI2,GNAO1,GNB4,GNB5,GNG2,GNG7,GPER1,GPR156,GPR85,GPRC5B,HAS2,HMOX1,HSPA5,IL11,IL15,IL1B,IL23A,IL24,IL6,IL7,IRF1,IRF3,IRF5,JAK2,LAMC1,LGALS3,LIF,LIFR,LOX,MAP2K1,MAP3K8,MYD88,NCALD,NFKB1,NFKBIA,NOS2,NTRK2,OPN3,P2RY1,P2RY6,PANX1,PDGFB,PRDX3,PRDX5,…	1504 (13)
seocalcitol		chemical drug	Inhibited	-2.927	1.42e-06	ACTR3,AKT1,ANKRD1,AREG,BAK1,BCL2L1,BIRC5,CDKN1B,CEACAM1,CKS1B,CYP24A1,E2F1,FOSL1,GADD45A,IGFBP5,IL24,ITGA7,KRT86,LRP1,MAP3K11,MCL1,NINJ1,NOMO1 (includes others),PDLIM7,PEX13,PTEN,PTGS2,RAB1A,RHOA,SGK1,SLC9A3R1,SNU13,STAT3,STAT6,TFAP4,TSPAN6,UVRAG,VDR,VEGFA	2207 (23)
PC-SPES		chemical drug			1.43e-06	ACLY,ACTR10,ANXA1,B2M,CCND1,CCNG1,CD9,CDC25B,CDC6,CDK2,CKS1B,COL16A1,COL1A1,COL4A2,CTNNA1,DCK,DSTN,DTYMK,FDFT1,FTL,GAPDH,GARS1,HLA-B,HLA-C,HMGN3,HSPA5,HYOU1,ID1,IFI27,IL1B,IRF1,IRF2,LAMC1,MAN2A1,MCM5,MGST1,MTCH1,MYH3,MYL6,OGT,P4HB,PA2G4,PEA15,PRDX6,QSOX1,SCARB1,SELENBP1,SELENOW,SEPHS2,SOX9,TMSB10/TMSB4X,TPM1,TUBA4A,UBE2C,VIM
SP3	-0.599	transcription regulator		-1.725	1.48e-06	ABCA1,ABCB1,ACSL1,AFAP1L1,APBA1,BIRC5,CBS/CBSL,CCND1,CD2AP,CDC25B,CDH2,CDKN1B,CEACAM1,CGB3 (includes others),COL1A1,COL2A1,COL7A1,CYP26A1,DHFR,DLX3,DMD,DNM1,DUSP1,E2F1,EGFR,EGR1,EIF2AK2,F3,FAS,FLT1,FOSL1,GDF15,GHR,GLTP,GNAI2,HAS2,HPSE,HSD17B1,HSPA5,IGF1R,IGFBP3,IL12RB2,IL1A,IRF3,ITGA2,ITGB5,ITGB8,JAM2,JUN,KRT81,LAMA1,LCAT,LDLR,LPL,MAT2B,MET,MMP2,MSH6,MUC4,NCF2,NFKB1,NR5A2,OLIG2,OPRD1,PCYT1A,PEMT,…	2474 (18)
mibolerone		chemical drug		0.495	1.48e-06	ACSL1,AHNAK,AHR,ALCAM,ALDH18A1,BMP6,CALR,CALU,CAMKK2,CCDC80,CCND1,CDK1,CEACAM1,CLEC11A,CLTB,CLTC,COL1A1,DHRS3,DNAJA4,DNAJB11,EIF2S1,EP300,F3,FDPS,FHL1,FKBP1A,FKBP5,FOSL2,GMNN,GPC3,HDLBP,HEXB,HLA-E,HSD17B11,HSP90B1,HSPA5,HYOU1,IDH3G,IFNGR1,IGFBP3,INCENP,IRF7,ISYNA1,JUN,KLF10,LDLR,LPL,LSS,MAN2A1,MME,NANS,P4HB,PPIA,PPIB,PRKCH,RPS27,S100P,SCAP,SEC23B,SERP1,SHANK1,SLC25A5,SMPDL3A,SPOCK1,SQLE,STMN1,TAX…	1482 (7)
mir-181	-2.023	microRNA	Activated	2.279	1.52e-06	ADCY9,APP,ATG5,BMI1,CDX2,CREB1,CXCL8,CYLD,DLX5,DUSP6,E2F5,GATA6,ICAM1,IL1B,IL6,IRF8,KLF6,MCL1,MME,MMP14,NLK,NOS2,NOTCH1,NOVA1,PRKCD,PTEN,PTGS2,PTPN11,RNF2,RUNX2,SIX2,SLC47A1,SMAD7,SPTLC1,SUZ12,TGM2,TIMP3,ZEB2	805 (8)
LMNA	-2.63	other		-0.99	1.54e-06	ABCC8,ADAMTS10,AHCTF1,AHDC1,AIFM2,ALPL,ANKRD37,ATP11B,BAMBI,BCL2L13,C19orf81,CBX5,CCN2,CCP110,COG3,COL12A1,COL1A1,COL3A1,COL8A1,CSTF2,CTDSPL,DNAJB12,DUSP4,E2F1,EDN1,EFNB3,ELK4,EPB41L3,ERCC5,FAM13C,FBXW7,FLT1,FN1,GATA4,GATA6,GET1,GHDC,GSTT2/GSTT2B,H3-3A/H3-3B,HAS3,HNF1B,HTRA3,ID3,IER5,IFI44,IFIH1,IRF1,IRF8,ISG20,JUN,KLF15,KLF5,KLF7,KRT18,LMNA,LRRC4B,MAFF,MAP3K8,MAP4K2,MBIP,MCAM,MEX3C,MIB1,MMP14,MS…	2241 (17)
OGT	0.968	enzyme		0.121	1.6e-06	ACADM,ACLY,ACO2,APP,ARTN,ATP2A2,BCL2L1,BIRC5,BTC,CCND1,CDH1,CDKN1B,CHST8,COX6C,DTNA,DUOXA1,ELOVL7,FGF5,FOXM1,GDNF,GNG4,HMGA1,IGFBP2,INSR,JUN,JUP,KRT18,LBH,LPL,MGAT5B,MMP2,MTX1,NDUFA5,NDUFA6,NDUFA8,NGFR,OGDH,OLIG1,PDHX,PLK1,PPARGC1A,PSMB7,PSMC1,PSMC4,PSMC6,PSMD14,PSMD3,PSMD6,SQSTM1,TET1,TNC,TP53,UCHL1,VIM	2399 (18)
dextran sulfate		chemical drug		-1.78	1.65e-06	ADA,ADAM8,AGTR1,AHR,ANLN,ATR,AURKA,BAG1,BIRC5,BLM,BMP4,C3,CALCB,CARD11,CCN2,CCNA1,CCNB1,CCND1,CCNF,CD14,CD177,CDCA3,CDCA8,CDK1,CENPE,CFH,CHAF1A,CHAF1B,CHTF18,CKS1B,COL18A1,CSF2,CTNNB1,CXCL2,CXCL3,CXCL8,E2F7,EFEMP2,EFNA2,EFNB2,ENG,ENPP2,EPHB4,EXO1,FANCF,FBXO5,FGFR1,FGFR3,FOXM1,HJURP,HMOX1,ICAM1,ID3,IFITM3,IGF1R,IL11,IL12A,IL18,IL1B,IL23A,IL36G,IL6,IRF7,ISG15,KCTD11,MCM3,MCM5,MCM6,MKI67,MLH1,MMP14,…	1492 (14)
SOX1	2.305	transcription regulator		0.905	1.68e-06	ACVR1,APCDD1,AXIN1,CDX2,CHST15,CITED1,COBLL1,CTNNB1,CYP26A1,DSP,DUSP1,DUSP4,DUSP5,ECSIT,EFEMP1,EOMES,EPHA2,EXT2,FARP1,FGF5,FOXF1,GBP3,GBP4,GREB1,HAND1,IER5,IRS1,KIF16B,NCKAP1,NRP1,PCDH18,PITX2,POU4F1,PPP2CA,TEAD1,TEAD2,TGFB2,TNFRSF19,TWSG1,VEGFA,WLS,WNT3,WNT5A,YAP1
VCAN	6.21	other		-0.305	1.79e-06	ADAMTS9,ADM,AGRN,ANGPTL4,ATRN,BDNF,C1R,C1S,C3,CASP1,CASP3,CBX6,CD59,CDH13,CEBPB,CXCL12,CXCL2,CXCL3,CXCL8,EGFR,ENPP2,F3,FABP5,FAS,FBLN5,FN1,FNDC1,FST,GPC6,GUCY1B1,HAS2,HAS3,ICAM1,IFI44,IFI44L,IFI6,IFIT1,IFIT2,IFITM1,IGFBP4,IL1B,IL6,IRF8,ITGA3,ITGA5,ITGB1,LAMB1,LGALS3,MAP1B,MCFD2,MEF2C,MIF,MSLN,MX1,MX2,MYH10,NFKB1,NFKBIA,OAS2,OAS3,PCSK1N,PCSK5,PLAU,PRDX5,RXRA,SMAD3,SMPDL3B,SOD2,SORT1,SPATS2L,STAT1,…	1094 (14)
GLI3	0.768	transcription regulator	Inhibited	-2.033	1.84e-06	AKT1,BMP4,CCND1,CUL4A,DLX2,DUSP1,DUSP5,EBF1,EGR1,EMX1,EMX2,FOXC2,FOXO1,GLI1,GLI2,H2AX,HAND2,HHIP,HOXA13,HOXD11,HOXD13,IRF1,JAG2,JUNB,KLF13,MAPKAPK2,NFKBID,NFKBIZ,NKX2-1,PAX2,PTCH1,PTHLH,PVR,RUNX1,RUNX2,SALL1,SOX9,STMN1,TERT,TNFAIP3,TNFRSF10A,WNT3A,WNT5A
EIF2AK3	-0.298	kinase		-1.445	1.86e-06	AARS1,ALDH18A1,ATF4,ATF5,ATG5,BDNF,BIRC2,BIRC3,CA9,CARS1,CBX4,CCND1,CEBPB,CLCN3,CTSC,CYB5R1,DNAJB9,DNAJC3,DNASE1,EGR1,EIF4EBP1,ELP3,EPRS1,ERO1A,ERO1B,ETS2,FBXO8,FGF2,FOSL1,GADD45A,HSPA5,IARS1,IL1B,IL6,JUN,LARS1,LMO4,MECR,NARS1,NFKB2,NOS2,PON2,PRDM1,RELB,RNASEL,SCN5A,SEL1L,SIAH2,SLC1A4,SNW1,SQSTM1,TBCE,TP53,TXNIP,UIMC1,VEGFA,XBP1,XIAP,YARS1,ZFP36	1162 (16)
ZBTB17	-0.483	transcription regulator	Inhibited	-2.118	1.9e-06	ANLN,BHLHE40,BTG3,CAMK2N1,CCNB1,CCNB2,CCND1,CD46,CDCA8,CDK1,CDKN2B,CENPF,CEP55,CKAP2,DDB2,ECT2,EGR1,FOXG1,FOXM1,IER3,IQGAP3,JUN,KDM8,KIF20A,KIF22,KIT,LDLR,MKI67,NCAPH,NDC80,NGFR,NOCT,NUF2,OSMR,PIMREG,PLK1,PMAIP1,RACGAP1,RHOA,SGO1,SPTBN1,TNFAIP2,TOP2A,TPX2,UBE2C,VPS72,ZFP36,ZNHIT3	2506 (23)
l-asparaginase		biologic drug		0.167	1.93e-06	ALDH1L2,ATF5,AURKA,BIRC5,CCNB2,CCNE2,CDC6,CDC7,CDK1,CENPA,CENPF,CENPL,CENPM,CENPN,CHEK1,DHCR7,DSN1,E2F7,EXO1,FANCD2,FDPS,GINS2,IDI1,INCENP,INSIG1,KIF20B,KIF22,KIFC1,LDLR,LIPG,MCM3,MCM5,MCM6,MIS18BP1,MSMO1,NCAPD2,NCAPG,NCAPH,NDC80,NIBAN1,NSL1,NUF2,PCSK9,PHGDH,PKMYT1,PLAGL1,PLK1,POLE,PSAT1,RAD51AP1,RAD9B,RBL1,RHOC,RMI2,SAA1,SGO1,SPDL1,SQLE,SRC,TM7SF2,TOP2A,TRIB3,UBE2C
stallimycin		biologic drug	Inhibited	-4.833	1.99e-06	BMP3,BMP7,CSF1,CXCL8,F3,IFI16,IFI27,IFI44,IFI6,IFIH1,IFIT1,IFIT2,IFIT3,IFITM1,IL1A,IL1B,IL24,IL36G,IL6,IL7,IL7R,IRF1,IRF7,ISG15,MX1,NOS2,OAS1,PML,SP110,STAT1,TGFA	1882 (14)
FANCC	-0.173	other		0.168	2e-06	ANKRD6,ATP1B1,AXIN2,CAMK2B,CASK,CDK1,CXCL12,DKK1,FGFR1,FHL2,FZD2,FZD4,FZD6,FZD9,GDF15,GSAP,HHEX,HNF1B,HOMER1,HSPA4,IFI44L,IGFBP3,IL1B,IL1R1,JAG1,MAP1B,MX1,MYOF,NKD1,NOS2,NR3C1,OAS1,PCLO,PHLDA2,PTGS2,RND3,RPGR,SCHIP1,SYPL1,TP53,UGT2B7,WWTR1	2061 (17)
NAMPT	-0.153	cytokine		-1.277	2e-06	ATXN10,AXL,BDNF,CDK2,CXCL1,CXCL2,CXCL8,E2F2,EPHA2,FN1,ID1,IL6,ITGB1,JUN,LEF1,MITF,NELL2,NPY1R,PEG10,POU3F2,PPARGC1A,SOCS2,TFAP2A,TFPI,TGFB1,TGFB2,TMSB15A,TP53,WNT5A,ZEB1	2094 (17)
IL1B	-10.095	cytokine	Inhibited	-8.084	2.03e-06	A4GALT,ABCC3,ABCD3,ACP3,ADAM8,ADAMTS3,ADM,ADRB2,AGTR1,AKR1B1,ALDH7A1,ALPL,AMPD3,ANGPTL4,ANXA1,APOL6,APP,ARC,ASIC3,ATF4,ATF5,ATP2A2,B2M,BAMBI,BBC3,BCL2A1,BCL2L1,BCL3,BDKRB1,BGN,BIRC2,BIRC3,BMP2,BMP4,C1R,C3,CABP1,CASP10,CASP3,CASP4,CAT,CAV2,CCN2,CCNJ,CD14,CD274,CD82,CEBPB,CEBPD,CFLAR,CLIP2,CMPK2,COL1A1,COL2A1,CSF1,CSF2,CTNNB1,CTSB,CTSF,CTSS,CTSZ,CXCL1,CXCL11,CXCL12,CXCL2,CXCL3,CXCL8,CXCR4,CYP27B1,D…	1499 (12)
YY1	0.214	transcription regulator		-0.185	2.08e-06	ALCAM,ANKRD1,ARID3A,ARID3B,ATF4,AURKA,BAK1,BCL2L1,BDNF,BIK,BIRC5,BMP4,BMP6,BTF3,CALR,CAPG,CASP7,CCNB1,CCNB2,CDC6,CDCA3,CDH1,CEBPB,CENPA,CENPE,CHRDL1,COL19A1,COL1A1,CXCL12,CXCR4,CYP24A1,DLX3,DMD,EBF2,EFNA3,EGFR,EGR1,ERBB2,FAS,FDPS,FOXM1,FUZ,GBP1,GFER,GPC3,GRIN2D,GTF2A1,H2AX,HAS2,HIF1A,HMOX1,HNRNPC,HOXD4,HSPA5,ICOSLG/LOC102723996,ID3,ID4,IGFBP5,IL1B,INCENP,KIF20A,KIF23,KIF5B,LAMA1,LDLR,LHX1,LMAN1,L…	2492 (23)
NRG1	-5.083	growth factor	Inhibited	-4.681	2.18e-06	ABCA1,ACTN1,AMOTL2,ANKRD1,ARTN,ATF4,AXL,BAK1,BCL2L1,BIN1,CAPN1,CASP3,CAV1,CAVIN1,CCN1,CCN2,CCND1,CCND3,CDH1,CDH4,CDKN1B,CDX2,COL1A1,CRIM1,CXCL8,CXCR4,DDAH1,DNAJB2,DUSP1,DUSP4,DUSP6,E2F1,EDN1,EGR1,ELF3,ELOA,EPHA2,ERBB2,ERBB3,ERRFI1,ETV5,FABP5,FGF2,FLNA,FN1,GAD1,GAS6,GATA2,GATA4,GDA,GLG1,GPER1,GPX3,GRB7,GRIN2C,HEXB,HIF1A,HK2,HMGA1,HMOX1,HOXD3,ID1,IDI1,IER2,IER3,IRF3,ITGAV,ITGB5,JUN,JUNB,LIFR,LIMK2,…	2247 (19)
PRNP	-3.103	other		-1.017	2.33e-06	ABCB1,ADAM8,AHR,APP,ATF4,CASP3,CCND1,CHST8,CTSD,DKK1,EGR1,EIF2S1,EPS8,ETS2,FGF9,FOSL1,FST,H2AX,HSP90B1,HSPA1A/HSPA1B,HSPA5,HSPA8,HSPB1,IGF1R,IL1B,IL6,IRS1,LAMP2,LRP1,MMP11,MMP2,NFKBIA,NOS2,NOTCH1,PDCD6IP,PDIA3,PLAUR,PLPP3,PRNP,SOX9,SYP,TCF4,TCF7,TCF7L1,TLE1,TP53	2086 (16)
mir-486	1.318	microRNA		0.65	2.5e-06	ADARB1,AFF3,ANKRD12,ARID4B,CREBL2,DCBLD2,EMP1,FOXO1,GABRE,PIK3AP1,PTEN,RFFL,SLC4A8,TWF1,UBASH3B,WDFY3,WT1
bortezomib		chemical drug		-0.602	2.56e-06	ALPL,ATF4,AURKA,BAD,BAG3,BAK1,BCL2A1,BCL2L1,BIK,BIRC2,BIRC3,BIRC5,BPGM,BRCA2,CALR,CASP1,CASP7,CASP8,CAV1,CBY1,CCN5,CCNB1,CCND1,CDK2,CDKN1B,CDR2,CEBPD,CFLAR,CXCL12,CXCL2,CXCL8,CXCR4,DKK1,DMD,DNAJB2,ERBB2,FANCD2,FANCF,FAS,FBXO2,FCMR,FOXO1,GADD45A,GADD45B,GDF15,GLI1,GREB1,HDAC1,HIF1A,HSP90B1,HSPA14,HSPA1A/HSPA1B,HSPA5,ICAM1,IGF1R,IGFBP3,IL12A,IL1B,IL6,IL6ST,IRS1,ITGA4,KIT,KLF9,LIF,MAPK1,MAPK6,MAX,MC…	1666 (13)
resiquimod		chemical drug	Inhibited	-3.616	2.61e-06	ACADS,ADAM8,ANXA4,APOBEC3B,ATF4,ATP5F1C,ATP5PF,BCL2A1,BMP6,BST2,C3,CASP4,CAT,CEBPB,CHST2,CHST9,CLEC7A,CMTM8,CREB5,CSF1R,CSF2,CXCL1,CXCL11,CXCL12,CXCL2,CXCL3,CXCL8,DDX60,DHX58,DLD,DLL4,DNAJB9,DNAJC3,EIF2AK2,ELF3,ETS2,FAS,FGF2,GBP1,GDF15,GM2A,GNG2,HERC5,HEY1,HHEX,HIVEP2,HSPA5,HSPB1,ICAM1,IER3,IFI16,IFI44L,IFIT1,IFIT2,IFIT3,IFIT5,IFITM1,IFITM3,IGFBP4,IL12A,IL15,IL18,IL1A,IL1B,IL23A,IL6,IL7,IRAK1,IRA…	1775 (15)
TFAP2A	-1.382	transcription regulator		1.175	2.67e-06	ABCA1,ADAM17,ALCAM,AMH,ANXA1,BCL2L1,BIRC3,BIRC5,BLCAP,BLOC1S6,BOK,CCN5,CDH1,CGB3 (includes others),CHRNA7,COL7A1,CXCL1,CXCL2,DCBLD2,DCLK1,EFEMP1,EGFR,ERBB2,FGFR4,FOXA1,FREM2,GLO1,HIPK3,HRK,ITGBL1,KLHDC3,LIPA,MCM5,MMP14,MMP2,MT2A,PITX2,PLAAT3,PLAU,PLAUR,PPARD,PPARG,PPP2R2A,PRDX1,PSAP,RAB27B,RPL6,SLC19A1,SMPD1,SOD2,STX7,TERT,TIMP1,TPM1,TPM3,VEGFA,XRN1	2313 (22)
Ifnar		group	Inhibited	-6.148	2.78e-06	APOBEC3B,AXL,B2M,C3,CASP1,CD274,CD8A,DDX58,EIF2AK2,GBP2,HLA-A,HLA-E,IFI16,IFI35,IFIH1,IFIT2,IFIT3,IFITM3,IFNGR1,IL15,IL1B,IL6,IRF1,IRF7,IRF8,IRF9,ISG15,ISG20,ITGA4,MYD88,NLRC5,NLRP3,OAS1,OAS2,OASL,PDCD1LG2,PSMB8,PSMB9,RNF213,RSAD2,SPP1,STAT1,STAT2,TAP1,TAP2,TAPBP,TLR2,TLR3,TRIM21,UBE2L6,UNC93B1,XAF1,ZBP1	1251 (15)
PITX2	4.232	transcription regulator		-0.289	2.79e-06	ATP1B1,CACNA1G,CCNA1,CCND1,CCND3,CDH1,CDH2,COL8A1,COL8A2,DACH1,DACT2,DHRS7B,DLX2,EGR1,EOMES,FOXC1,FOXC2,FOXJ3,FOXO1,FZD2,FZD3,FZD4,FZD9,GAD1,GADD45A,GATA2,GPX7,HMX1,IDH2,IRF6,ISL1,ITGAV,ITGB1,KCNJ11,KCTD1,KCTD20,LEF1,LHX2,LHX6,LMX1B,ME3,MGA,MSC,NDUFB4,NDUFS2,NDUFS7,NDUFS8,NGFR,NMRAL1,NXN,PITX2,PLOD2,PRDX2,PYCR2,SATB1,SDHC,SHOX2,SOD1,SOD2,SOX2,TBX1,TBX2,TBX3,TRIO,TXN2,VIM,WNT5A,WNT9A,ZEB2	2456 (21)
Tgf beta		group	Inhibited	-4.573	2.83e-06	ABCA1,ADAM12,ADGRE5,ANGPTL4,AXIN1,BAMBI,BASP1,BCL2L1,BGN,BHLHE40,CASP1,CASP8,CCN1,CCN2,CCND1,CDH1,CDH2,CDK2,CDK6,CDKN1B,CDKN2B,CEBPB,CFLAR,CHST11,COL12A1,COL1A1,COL4A1,COL4A2,COL5A1,COL6A2,COL7A1,CSF1,CSF1R,CSF2,CTNNB1,CXCL2,CXCL3,CXCL8,CXCR4,DLX2,EDN1,ENG,FBLN2,FGF2,FN1,FST,FSTL3,FURIN,GADD45B,GLI2,HEY1,HMOX1,HSPG2,ID1,ID3,IGFBP3,IGFBP4,IGFBP5,IL1A,IL1B,IL32,IL6,INPP5D,ITGA1,ITGA2,ITGA5,ITGA6,IT…	2330 (16)
DDIT3	-1.024	transcription regulator		0.169	2.84e-06	ANKRD1,ATF4,ATF5,ATF7IP2,ATG5,BAK1,BBC3,CAMK2N1,CASP4,CCDC80,CEBPD,CFLAR,CHAF1A,CXCL8,DCTPP1,DDR2,DOCK4,DPY19L4,ERO1A,FLYWCH1,FN1,FNBP1L,FOXO1,GPC6,HMOX1,HSPA5,HSPD1,IL12A,IL1B,IL6,ITGA2,JAG1,KRT6B,LOX,LTBP3,NFE2L2,NPAS2,PER1,PLEC,PPARG,PPARGC1A,RGS4,SH3RF3,SIPA1L3,SLC5A5,SNAI2,SOX2,SPOCK1,SRSF1,STAT3,STAT5A,TENM4,TGFB2,TGM2,THBS2,TNFRSF10A,TRIB3,TSC22D3,TXNIP,VIM,XBP1,XPOT,ZNF827	2059 (16)
tunicamycin		chemical - endogenous non-mammalian	Inhibited	-2.766	2.88e-06	ABCA12,ABCB1,ACOX1,ADAM10,ADCYAP1R1,ADIPOR2,AKT1,ATF4,ATP2A2,AXL,BBC3,BIK,BIRC2,BIRC3,CALR,CAMKK2,CANX,CASP4,CCND1,CCND3,CDH1,CDKN1B,CEBPB,CEBPD,CHAC1,COL2A1,COL6A1,CPT1A,CPT2,CXCL2,CXCL3,DGAT1,DGAT2,DNAJB11,DNAJB9,DNAJC3,EDEM2,EGR1,EIF2S1,EIF4EBP1,ERLEC1,ERO1A,ERO1B,ETS1,FITM2,GADD45B,GOLGA3,GPT2,HCN2,HDLBP,HMOX1,HSP90B1,HSPA5,ICAM1,IFRD1,IL1A,IL1B,IL6,LMAN1,LMF1,MANF,MCL1,MLXIPL,MORF4L2,NARS1,N…	1765 (17)
IKBKB	1.031	kinase	Inhibited	-4.791	2.89e-06	ABCA1,AMPD3,ANKRD1,BCL2L1,BIRC2,BIRC3,BMP2,BRCA2,C3,CASP8,CCN2,CCND1,CCNE2,CDC25B,CDC6,CDH1,CDH13,CEBPB,CEBPD,CFLAR,CKS1B,CLDN1,CSF1,CSF1R,CSF2,CTNNB1,CTSB,CTSF,CTSZ,CXCL1,CXCL12,CXCL16,CXCL2,CXCL3,CXCL8,CXCR4,CYP1B1,DGKA,DUSP6,ECT2,EDN1,EGLN1,EGR1,ENPP2,ETS1,F3,FAS,FOXF2,FOXM1,FOXO1,FYN,GADD45A,GBP2,GBP3,GLI1,GM2A,GRK5,GRN,H2AX,HIF1A,HK2,HLA-A,HMOX1,ICAM1,IFI16,IGFBP2,IGFBP6,IGFBP7,IKBKB,IL11,IL…	1799 (13)
MKNK1	-1.065	kinase		-1.652	3e-06	AGRN,ANXA2,BAG3,BMP8B,CCN1,CRMP1,DPYSL3,ETS1,FLNA,FLNB,GNAI1,GNAO1,GPC4,HSPA4L,IFIT2,IFRD1,ISG15,KIF21B,KIF5A,KLF13,LAMC1,MAN2A1,MAP1B,MAPK1,MAPK8IP3,MAPT,MYO5A,MYO6,NELL2,NR4A3,PAFAH1B1,PDLIM5,PLTP,PLXNB2,PREP,RAB14,RAB3A,SERPINH1,SFR1,SMAD2,SPARC,STXBP1,SYN2,TAGLN,TFDP1,THRA,TM9SF2,TMBIM6,TPP1,TRIM32,TTC3,TXNIP,VAMP2,VIM,YWHAG,ZCCHC18
PP2/AG1879 tyrosine kinase inhibitor		chemical - kinase inhibitor	Activated	3.053	3.07e-06	ACSL4,AKT1,BIRC3,CBL,CCN2,CDH1,CDH2,CDKN1B,CXCL16,CXCL8,DSP,DUSP1,EDN1,EGFR,EPHA3,FGF2,FN1,GFPT1,GRIN2C,HIF1A,HMOX1,HOXD10,ICAM1,ID1,IGF1R,IL1B,IL32,IL6,JAK2,JUP,LYN,MAPT,PER1,PLAU,PRDX3,PTGS2,PTTG1,RAC1,RHOA,RHOC,RRM2,SOD2,SPP1,SRC,TJP1,TP53,VEGFA,VIM	1026 (13)
RARA	-0.406	ligand-dependent nuclear receptor		1.153	3.15e-06	AASS,ABCA1,ABHD2,ABLIM1,ACACB,ADAM10,ADAM17,ALDH1A2,ANO10,ARHGAP1,ARNT2,ARPC5L,ATF5,ATG13,BIRC5,C18orf25,CCNA1,CCNC,CCND1,CCPG1,CD14,CD24,CD9,CDK1,CDKN1B,CDKN3,CEBPB,CENPA,CENPF,CENPM,CENPN,CENPU,CLMN,CLOCK,CRABP2,CREBL2,CTNND1,CTSS,CXCL8,CXCR5,CYP26A1,DHRS3,DISC1,DUSP1,E2F1,E2F7,EGR1,EIF5A2,ELL2,ENAH,ENOX1,FGFR1,FGFR4,FOSL2,FOXC1,FOXD3,GATA4,GCK,GDF15,GHR,GJB4,GLI1,GREB1,HCP5,HLA-B,HLA-C,HNF1B,H…	2309 (21)
MECP2	-0.174	transcription regulator		0.25	3.17e-06	ABCB1,ACTB,ADAM12,ADGRL3,ANXA1,ARHGAP24,ARHGAP42,BDNF,CAMK2B,CAPG,CCNA1,CD99L2,CDH1,CDH2,CDH8,CDKN2B,DLX5,DLX6,E2F1,EFNB1,EFNB3,EGR1,EHMT2,ENPP4,FKBP5,FOXG1,FOXP2,GABBR2,GABRB3,GAD1,GFRA1,GSTO1,GSTP1,HOXD9,HSPA5,IGFBP3,IRAK1,ITGA6,JUNB,LGALS1,LMNA,MARCKS,MBP,MET,NAV3,NECTIN1,NEDD4L,NEFH,NGFR,NPY1R,NR4A1,NRP2,NTN1,NTRK2,PCDH10,PLAAT3,PLXNA3,PLXNB1,PLXNB2,PTGS2,RAB39B,RARB,REST,RHOB,RTN4RL2,S100A4,…	2236 (20)
nitric oxide		chemical - endogenous mammalian		-1.075	3.17e-06	AGTR1,AHR,AKT1,APP,ARID1B,BBC3,BCL2L1,BIRC2,BIRC5,CASP7,CCN2,CCND1,CCNG1,CDKN1B,CTSH,CXCL12,CXCL8,DPYSL3,DUSP1,DUSP6,ECE1,EDN1,EGR1,EN2,FAS,FLT1,FTH1,GADD45A,GCLM,GSTA4,GSTP1,HEY1,HMOX1,HPRT1,HSPG2,IER3,IL12RB2,IL18,IL1B,IL6,IL7R,JUN,JUNB,MGST1,MKI67,MMP2,NCAM1,NFE2L2,NID1,NOS2,NQO1,NR3C1,OPRD1,PMAIP1,PPARGC1A,PPM1D,PRDX5,PRKDC,PRKG1,PTGS1,PTGS2,RAD23B,RXRG,SGK1,SLC16A4,SMARCC1,SOD1,SPP1,SQSTM1,T…	1965 (14)
ID2	0.035	transcription regulator		-1.098	3.27e-06	ADM,ASCL2,AXIN2,BCL2L1,BCL3,BMP7,CCNB1,CCND1,CCNE2,CCNG1,CD19,CDC25B,CDC6,CDH1,CDK1,CEBPB,CSF1,CTNNB1,CXCR4,CXCR5,DGKA,DLL4,DTX2,DUSP1,DUSP10,DUSP22,DUSP4,E2F2,EOMES,ETS2,FGFR3,FOXO1,GADD45B,GFI1,HIF1A,HOMER2,ICAM1,ICOSLG/LOC102723996,IFI16,IFNGR1,IGFBP4,IKZF2,IKZF3,IL20RB,IL4R,IL7R,IRF5,IRF6,IRF8,ITGA1,ITGA3,ITGB5,JAK2,JDP2,KLF6,KLF7,LAMA4,LEPR,LGALS1,LMO2,LMO4,LRIG1,MAF,MAP3K14,MAP4K3,MECOM,MMP…	2445 (26)
IGF1	1.301	growth factor	Inhibited	-3.461	3.32e-06	ABCA1,ADA,ADM,AKR1B1,AKT1,APP,ATP2A1,BAD,BAK1,BBC3,BCL2A1,BCL2L1,BDNF,BGN,BHLHE40,BIRC3,BIRC5,BMP2,BMP4,CASP3,CCN1,CCN2,CCNB1,CCND1,CCND3,CCNG1,CDH1,CDK1,CDK2,CDKN1B,CEBPB,CEBPD,CFLAR,CLEC11A,CNP,COL1A1,COL2A1,COL3A1,CREB1,CSF1,CTNNB1,CTSD,CXCL8,CYFIP2,CYP27B1,DAXX,DCLK1,DMD,DUSP1,DUSP6,E2F1,EDN1,EFNB2,EGR1,EIF2AK2,EIF4B,EPAS1,ERRFI1,ETV6,F3,FBXO32,FGFR1,FN1,FOXA1,FOXC2,FOXE1,FOXG1,FOXO1,GADD45A,…	2817 (19)
RGS2	0.464	enzyme		1.483	3.38e-06	ADM,ANXA4,AQP3,ARHGEF16,ATXN10,BAD,BCAR3,C1GALT1,CEBPD,CHMP4B,CTSA,CXCL12,DECR1,EFNA1,EPN1,ERRFI1,EVA1A,F3,FBLIM1,FXYD3,GAPDH,GLA,GNPTG,GRINA,HBEGF,HEXB,HSP90B1,IGFBP3,IL18,INKA1,LPL,MAGED1,MANF,MED10,NINJ1,OSTF1,PDLIM1,PDLIM2,PDLIM4,PLAC1,PLXND1,PPARG,PPIB,RFLNB,SCARB1,SDF2L1,SLC16A1,SLC2A1,SLC35F1,SLC35F2,SLC7A8,SNX3,SPP1,UGCG,WDR61	1796 (18)
caffeic acid phenethyl ester		chemical drug	Activated	3.199	3.55e-06	ABCB1,ABCB10,BAG1,BCL2L1,BCL2L2,BIRC3,BIRC5,CASP3,CCNC,CCND1,CCNG1,CDK2,CDKN1B,CSF2,CTSB,CXCL8,E2F1,EGFR,EGR1,ELOVL1,ERCC1,F3,FTH1,FTL,GNAI2,GSR,HMOX1,HSPB1,ICAM1,IGFBP6,IL1B,IL6,KLF6,MKI67,MMP14,MMP2,NFE2L2,NFKB1,NFKB2,NFKBIA,NGFR,NOS2,NQO1,OLR1,PTGS2,RARB,RB1,RELB,RHOB,RXRA,ST13,STAT3,TCP1,TGFB1,TLR2,TP53,VIM,XIAP	1627 (14)
PSEN1	-0.686	peptidase		0.747	3.62e-06	ACO2,ACSL1,ACTB,ACTG1,AMPH,APP,ARC,ARF6,ARHGDIG,ATP1B1,ATP2A2,ATP5F1B,ATP5F1C,ATP5F1D,ATP5PF,AXL,BASP1,BDNF,C11orf1,C1QBP,C1R,C1S,C3,CANX,CAP1,CASP3,CCDC25,CCND1,CD9,CDH2,CFL1,CHRNA7,CKB,CKMT1A/CKMT1B,CLEC16A,CLTB,CLTC,CRYM,CTNNB1,CTSC,CTSD,CTSS,CTSZ,CUEDC1,CXCL2,CYCS,CYFIP2,DBP,DHRS7,DNAJC5,DSTN,DUSP1,DYNLL2,EGFR,EGR1,EIF5A2,EMP1,ENPP2,ENSA,ERMP1,FAM32A,FBL,FBXW7,FKBP1A,FMN2,FZD4,GADD45B,GAPDH,G…	2178 (20)
TRIM24	1.495	transcription regulator	Activated	5.901	3.64e-06	AGRN,CALHM6,CMPK2,CSRP1,CYP24A1,DDX58,DDX60,DHX58,EMB,EPHA6,EPSTI1,FAM110B,FBN1,GBP2,GBP3,GBP4,HERC6,HNF1B,IFI35,IFI44,IFIH1,IFIT2,IFIT3,IFNGR1,IL1R1,IRF1,IRF7,IRF9,ISG15,JAK2,LGALS3,LGALS3BP,MOV10,MYH10,NMI,NUMA1,OAS1,OASL,PACSIN3,PARP12,PHF11,PIK3CA,PLAC8,PLEC,PSMB10,PSMB8,PSMB9,PTHLH,RTP4,SAMD9L,SAMHD1,SOCS2,SPP1,STAT1,STAT2,TAP1,TLR2,TP53,TRIM26,UBA7,VEGFA	733 (10)
imipramine blue		chemical drug		0.551	3.64e-06	AURKA,CASP4,CCNB1,CCND1,CCNE2,CCNF,CDC25A,CDK2,CENPA,CENPE,CENPF,CENPK,CERK,E2F2,EXO1,FOXM1,FOXQ1,FOXRED2,GADD45A,GSTO2,PLK1,SOD2,SOX9,STMN1	862 (9)
isobutylmethylxanthine		chemical toxicant	Inhibited	-2.635	3.75e-06	ABCA1,ACLY,ACOX1,ACSL1,ACSL4,AKT1,ALDH3B1,ANGPTL4,APLN,AREG,ATP5F1D,ATP5MC1,ATP5MC2,BDNF,BMPR2,CAV1,CAV2,CCK,CCN2,CCND1,CCNE2,CD14,CDK2,CDKN1B,CEBPB,CEBPD,COL1A1,COL3A1,COL5A1,COL6A1,CRABP2,CREB1,CXCR4,CYCS,DGAT2,DHFR,DHRS3,EGFR,EGR1,ELOVL3,ENC1,ETFA,FN1,GAPDH,GNPAT,HSD17B7,IFIT2,IFIT3,IGF1R,IL1B,INSR,IRF7,ITGA1,ITGA3,JUN,JUNB,LPL,MAPK1,MAPK3,MITF,MMP2,NCOA2,NDUFS2,NDUFV1,NDUFV3,NOS2,NOTCH1,NR1H3…	2685 (22)
IRF5	-7.668	transcription regulator	Inhibited	-4.893	3.9e-06	AKT1,BAK1,BCL2L1,BID,CASP3,CMPK2,COL1A1,COL3A1,COL4A1,CXCL11,CXCL2,CXCR4,DAPK2,DDX58,DHX58,EP300,FOXO1,IFI44,IFIH1,IFIT1,IFIT2,IFIT3,IFITM3,IL12A,IL23A,IL6,IRF5,IRF7,ISG15,ISG20,NFKB1,OAS1,OAS2,OASL,PARP12,PDCD2,PLSCR1,PMAIP1,PRDM1,PTGS2,RAC1,RSAD2,SP110,STAT1,STAT2,TGFB1,UBE2L6,USP8,VEGFA,YWHAE	1412 (18)
KAT6A	0.965	enzyme	Activated	3.499	4e-06	CDC6,CDCA8,CDKN2B,CDKN2D,E2F2,GSTP1,HOXA10,HOXA11,HOXA13,HOXA5,HOXA6,HOXA7,HOXA9,HOXB2,HOXB3,HOXB5,HOXB6,HOXC10,HOXC11,HOXC13,HOXC4,HOXC6,HOXC8,HOXC9,HOXD10,HOXD11,HOXD13,HOXD3,HOXD4,MELK,SMARCA2	1165 (7)
CBX5	0.645	transcription regulator	Activated	2.266	4.14e-06	ABCB1,AKR1C3,ANKRD22,ASCL2,AXIN2,BCL11A,BIRC5,C15orf48,CD24,CDC25A,CDC6,CEACAM1,CEMIP,CPA4,CYP1B1,ERAP2,FGFBP1,FKBP14,FOXA1,FOXQ1,GALC,GASK1B,GCNT3,GRHL3,HENMT1,HOXA13,HOXB6,ICAM2,IGFL2-AS1,ITGA7,KIT,KRT80,LEF1,MAL2,MAP1LC3A,NNT,OAS1,OLR1,PLAAT4,PPARG,PROM2,PRSS23,PSMB8,PTK6,QPRT,RIN2,RNF39,RORA,RUNX2,S100P,SELENBP1,SERP2,SH3GL2,SLC7A8,SNTB1,STAT5A,SYTL2,TCEAL1,TCEAL3,TLE4,TM4SF1,TXNIP,ZSCAN16-AS1
F7		peptidase	Inhibited	-2.95	4.2e-06	CASP7,CCN1,CCN2,CCND1,CLDN1,CXCL2,CXCL8,EEF2,EGR1,F3,FGF5,FOSL1,GADD45A,HBEGF,ICAM1,IER2,IL1B,IL6,JAG1,KLF5,LIF,MMP14,PLAUR,PTGS2,RND3,SERPINB2,VEGFA,ZFP36	1049 (13)
CD44	-6.112	other	Inhibited	-3.18	4.23e-06	AAK1,ABCB1,ACTB,ADAM8,ADRB2,ANXA11,ARHGEF12,BCAM,BCL2L1,BGN,BIRC2,BIRC3,BIRC5,BMI1,CALR,CCND1,CCNG1,CD274,CD63,CD8A,CDH1,CDH5,CDKN1B,CDX2,CLEC7A,COL18A1,COL1A1,COL3A1,CRABP2,CSF2,CTDSP1,CTTN,ECM1,EP300,ERBB2,FAS,FKBP4,FKBP5,FN1,GADD45A,HAS3,IFITM2,IL1A,IL1B,IL6,IRAK3,ITGA3,ITGA4,ITGA5,ITGAV,ITGBL1,JUN,KCTD10,KDM1A,KREMEN1,LAMB1,LAMC1,LGALS1,LGALS3,LHX6,LTBP1,LTBP2,MAPK8,MBNL3,MCL1,MET,MMP14,MMP2,…	2267 (18)
ANGPT2	1.071	growth factor		-1.863	4.26e-06	ABCA1,ABCC1,ADA,ADAM12,AGTR1,APIP,ARL4C,AXIN2,BAG1,BCR,C1R,CALR,CASP3,CAT,CCT7,CDC34,CEBPB,COL18A1,COL1A1,COL3A1,CWC22,DBNL,DNASE1,EDN1,EFR3A,EGFR,EIF1,ETS1,EXT2,FAS,FKBP4,FLT4,FN1,GATA4,GATA6,GSK3B,HDAC5,HIF1A,HMOX1,HSPA1A/HSPA1B,HSPA4,HSPA5,HSPD1,ICAM1,IL18,IL1B,IL6,INPP5F,KIF1C,KLF5,LEPR,LIG4,LMNB2,LYN,MAP2K1,MAP3K7,MAP4K5,MAPK12,MGST1,MIF,MMP2,NCOA2,NR3C2,OLR1,P4HB,PDCD4,PDIA3,PDIA5,PGAP1,PHL…	1395 (13)
PIK3R1	0.579	kinase		-1.783	4.36e-06	ATF4,ATF5,BCL2L1,CCND1,CDKN1B,CXCL12,CXCL8,DNAJB9,DNAJC3,ENG,F3,FOXO1,HIF1A,HMOX1,HSP90B1,HSPA5,ICAM1,IL12A,IL1B,IL6,IRF7,ISG15,MAFA,MITF,MKI67,MMP2,NFE2L1,NFE2L2,NOS2,PDHA1,PDK1,PDX1,PIK3CA,PIK3CB,PIK3R1,PKM,PLAU,PPARG,PTEN,PTGS2,SLC2A1,SLC5A5,SOD2,TGFB1,TGFB2,TRIB3,TXNIP,VEGFA,VEGFC	1852 (13)
miR-17-5p (and other miRNAs w/seed AAAGUGC)		mature microRNA	Activated	3.333	4.44e-06	APP,ARID4B,BAMBI,BIRC5,BMP2,BMPR2,BNIP2,CAMTA1,CCND1,CDK7,CREB1,CRIM1,CXCL8,E2F1,E2F2,E2F3,H2AX,HIPK3,ITCH,ITGB8,MEF2D,MICA,NCOA3,PPARA,PPARG,PTEN,RB1,RHOA,RHOC,RUNX1,RUNX2,STAT3,TGFBR2,TP73,TUSC2,TXNIP,VEGFA,VIM,ZBTB7A	1873 (15)
TWIST1	8.833	transcription regulator		-0.308	4.53e-06	AKT2,ALCAM,AOPEP,AXL,BMI1,C3,CASP3,CBX2,CCDC3,CCK,CDH1,CDH2,CELSR1,CLDN4,COL1A1,COL2A1,COL6A1,CXCL12,CXCL8,DDR2,DKK3,DNM1,DPYSL3,EFNB2,EPCAM,ETS1,FAS,FBN2,FGFR3,FN1,FOSL1,FOXC2,FOXO1,FREM2,GLI1,GPC1,GSN,HEG1,HOXD10,IGFBP4,IGFBP5,IL1B,IL6,ITGA8,ITGB5,KCNN4,KIT,LMNA,MET,MME,MMP2,MRC2,MXRA8,NCAM1,NT5E,OSGIN1,PCDH18,PCOLCE,PDZD2,PRKD1,PTPRZ1,RELB,RHOA,RHOC,RUNX2,S100A4,SNAI2,SPHK1,SPOCK2,SPP1,TGFB1,T…	2092 (19)
ADRB		group		1.214	4.68e-06	AACS,ACSS1,ADGRL4,ANGPTL4,ANKRD1,ATF5,AXL,BAD,BAK1,BCL10,BDNF,BHLHE40,BOK,BRCA2,CASP3,CASP4,CASP6,CCND1,CDC7,CDK6,CDKN1B,CFLAR,CXCL2,E2F1,E2F3,ENDOD1,FAM110C,FAM214A,FAS,FDPS,GADD45A,GATA4,GCLM,GDF15,HMOX1,HSD17B7,HSD3B7,HSPD1,ICAM1,IFIT3,IKBKG,INSIG1,JUN,JUNB,LBH,LSS,LTBP1,MSMO1,NBN,NFKBIA,NOS2,NOTCH2,NPM3,NQO1,NR4A1,NR4A3,OASL,PDGFB,PKD1,PPARGC1A,PPM1D,PTGS2,RSAD2,RTL8B,SLC40A1,SLC7A11,SLC8A1,S…	1713 (14)
mir-122		microRNA	Activated	3.367	4.8e-06	ADAM10,ARHGAP1,BCL2L2,BICD1,CACYBP,CCNG1,CDA,CDC42BPB,CREB1,CSRP1,CUX1,FBLIM1,FKBP1A,FOSL2,FUT8,G6PD,GALNT10,GNPDA2,GNPNAT1,GTF3C2,IGF1R,IL6,INSIG1,IQGAP1,KHDRBS1,KIF5B,KLK5,LAMC1,LMNB2,MAP1B,MAP4,MAPRE1,MVK,NPEPPS,NUTF2,PKM,PLIN3,PPP2CA,PTPN1,PTPN14,PXN,RAD21,RBM3,SERPINB6,SH3BGRL3,SLC1A5,SLC7A1,TGM2,TPD52L2,VIM,VPS4B,YARS1
SRF	0.129	transcription regulator	Inhibited	-2.195	4.81e-06	ACTB,ACTG1,ANKRD1,ANKRD6,APOLD1,ARC,ARHGAP20,BCL2L1,BICC1,BMP2,BPGM,BRD3,CALD1,CAP1,CAPRIN1,CCDC174,CCM2,CCN2,CD177,CD19,CDKN2B,CEBPD,CENPB,CLDN1,CLDN12,CLDN15,CNN2,CPM,CSRP1,CTNNB1,CTNNBL1,CXCR4,CYLD,DMD,DSTN,DUSP5,E2F5,EGR1,EIF6,EPG5,ETS1,EYA2,EYA3,EZR,FERMT2,FHL1,FHL2,FILIP1L,FLNA,FLT1,FLT4,FOSL1,FOXQ1,FST,G0S2,GADD45A,GATA4,GDA,GFI1,GLIPR1,GPATCH4,GPM6A,GSN,GTF2H5,HES6,HMOX1,HOTAIR,HSPG2,IER2…	1647 (19)
DNMT3B	1.575	enzyme		-1.087	4.87e-06	ACTB,AGTR1,AHCTF1,APP,ATP2A2,BATF3,BEX5,BIK,CACNA1C,CAMK4,CBX5,CDH1,CDK1,CHFR,CYP1B1,DNMT3B,ELF4,EPDR1,EPM2AIP1,ESRP2,FGF2,FOXA1,FOXF2,GATA4,GLT8D2,GRK3,GUCY1A1,HDAC9,HOXA13,HOXB13,IFI27,IFIT1,IFITM1,IRF5,JAKMIP2,KIT,LONRF1,LRRC34,LXN,MAGEA3/MAGEA6,MAPK4,MAPRE3,MFN2,MGST1,MLH1,MLH3,MUC4,MYL6,MYL6B,MYL9,MYT1,NAP1L2,NFATC3,NOS2,PAK6,PAX6,PLAAT3,PLEKHA6,PLP2,PNPLA3,POU5F1,PPP1R1A,PRNP,PRUNE2,PSEN2,P…	2020 (17)
BNIP3L	-0.023	other		0.162	5.22e-06	AURKA,BCL2L1,CCND3,CCNE2,CD19,CD47,CDKN3,CENPE,CENPF,CHEK1,CKAP2,CST3,E2F1,FANCD2,GADD45A,GAPDH,GPSM2,GSN,HK2,IL1B,ITPR3,MAP4K1,NFKB2,NFKBIA,NUF2,PFKFB3,PKM,PTK2B,RBL1,RRM2,SGO1,STAT3,SYK,TFRC,TGFB1,TIMP2,TOP2A	1639 (12)
NGF	-1.614	growth factor	Inhibited	-2.386	5.47e-06	ACER2,ADGRL2,ADM,AGRN,ANXA2,APP,ASIC1,ASIC3,AXIN2,BAMBI,BBC3,BCL2L1,BDNF,CALCB,CAV1,CCND1,CDH1,CDK1,CDK2,CDKN1B,DHX9,DPYSL5,DUSP1,DUSP4,DUSP6,E2F2,ECEL1,EGFR,EGLN3,EGR1,EHD4,EPAS1,EPHA4,ERRFI1,ETV4,ETV5,FAS,FOSL1,FOSL2,FRRS1,GADD45A,GAL,GSK3B,GUCY1A1,GUCY1B1,HMOX1,HTT,ID1,ITGA1,ITGA2,JUN,JUNB,KCTD11,KIF3C,LDLR,LIFR,LRP1,LRRFIP1,MACROD1,MAFK,MAP3K11,MAPK14,MAPK8IP3,MMD,MMP2,NAB2,NGFR,NKD1,NR4A1,OP…	2666 (19)
EWSR1-FLI1		fusion gene/product		0.702	6.07e-06	ADM,AK5,BBOX1,CALCB,CALD1,CAV1,CCN1,CCN2,CCND1,CD24,CD99,COL25A1,COL3A1,EDN1,EPPK1,EYA3,F11R,FILIP1L,FOXM1,ID1,IGF1R,IGFBP5,KAZN,LIMCH1,LOXL1,MTMR10,MYH10,MYH9,NFKBIZ,NREP,PCDH18,PDGFRL,RHOBTB1,SAMD5,SDC2,SELENOP,SH3BP4,SH3D19,SLFN11,SLFN5,SULF1,TAGLN,TGFBR2,TLE1,TPM1,TRNP1
Hdac		group		1.83	6.1e-06	ACVR2B,ADGRL3,AGTR1,AHR,ARC,AREG,BCL2L1,BDNF,BIRC5,BMI1,BMP2,CCND1,CRABP2,CSF1R,CTNNB1,CXCL8,CXCR4,CYP24A1,DKK3,DNMT3B,EDN1,EGFR,EGR1,EMX2,ERBB2,EYA1,FBXO32,FOSL1,FOXA1,GAD1,GADD45B,GDNF,GLI2,HIF1A,HNF1B,HOXA11,HOXD11,HTRA1,IGFBP3,IL1B,IL6,ITGA8,JUN,JUP,KCNH2,KLF10,KLF6,KLF9,LHX1,LIN28B,LRP2,MEOX1,MGAT5B,MMP14,MT1E,MT1F,MXD1,NCKAP1,NDRG4,NPNT,NR4A1,NRP1,ONECUT2,PKHD1,PPARGC1A,PSG5,RARB,ROBO2,SEMA…	2118 (18)
AHR	-1.705	ligand-dependent nuclear receptor		0.169	6.3e-06	ABCC4,ACOX1,ACTL6A,ACTN1,ADAM19,ADAMTS2,ADIPOR2,ADM,APP,AREG,ARG2,ARNT,ATOH8,ATP2B1,CADM4,CAMK2N1,CASP8,CBR3,CCNB1,CCND1,CCND3,CCNF,CD14,CDC25B,CDH1,CDH2,CDK1,CDK2,CDKN1B,CDKN2B,CDKN2D,CGREF1,CHD7,CHST2,COL12A1,COL13A1,COL14A1,COL16A1,COL1A1,COL3A1,COL4A1,COL4A2,COL5A1,COL6A1,CTNNB1,CTSD,CYP1B1,CYP2S1,DACT2,DHFR,DUSP6,E2F1,EBF1,EDN1,EFEMP1,EGLN1,EGLN3,EHD1,ENHO,ENPEP,ESRRG,FAS,FBLN2,FBLN5,FBN2,FG…	2568 (19)
ERK1/2		group	Inhibited	-3.419	6.33e-06	ABCA1,AKR1C3,ALPL,ANKRD2,APLN,AREG,ARRB1,ASAH1,B2M,BCL2A1,BCL2L1,BDNF,BIRC2,BIRC3,BMP2,C3,CACNA1C,CALR,CAT,CAV1,CCK,CCN2,CCND1,CDC25A,CDC42EP5,CDK1,CDKN1B,CEBPB,CFLAR,CLEC11A,COL1A1,COL2A1,COL3A1,CSF2,CTSB,CTSV,CXCL1,CXCL2,CXCL3,CXCL8,CXCR4,DAPK1,DKK1,DUSP1,DUSP4,ECE1,EDN1,EFNB2,EGR1,ETS1,EZR,F3,FGF2,FKBP5,FLT1,FN1,FOSL1,FOXO1,GAD1,GRK5,HAS2,HBEGF,HK2,HLA-A,HMGA1,HSPA5,ICAM1,ID1,ID3,IFIT1,IGF1R,I…	2170 (15)
miR-486-5p (and other miRNAs w/seed CCUGUAC)		mature microRNA		0.757	6.47e-06	ADARB1,AFF3,ANKRD12,ARID4B,CREBL2,DCBLD2,EMP1,FOXO1,GABRE,PIK3AP1,PTEN,RFFL,SLC4A8,TWF1,UBASH3B,WDFY3
MAP3K1	-0.167	kinase	Inhibited	-2.258	6.49e-06	BIRC2,BIRC3,CCND1,COL3A1,COL4A1,CSF2,CSTA,CXCL8,DUSP1,EGR1,FAS,HMOX1,HSPB1,IKBKB,IRF3,JUN,LDLR,LOXL3,MAN2B2,MUC4,PLA2G4A,PLAU,PLAUR,PPARD,PRDX1,PTGS2,RGS4,RGS7,TGFB1,TIMP1,TNC,TNFRSF10A,TOP2A,TP53	2026 (15)
IKZF1	6.565	transcription regulator	Activated	4.895	6.65e-06	ADAM19,AJUBA,ANOS1,ARF3,AXL,B2M,BCL2L1,BCL9L,CAV1,CAV2,CCND3,CD8A,CDK6,CDKN1B,CEMIP2,CTNND1,CXCL2,DIPK1A,DKK1,DNAJC6,DNM1,DOCK4,DOCK9,DTX3L,DUSP5,EBF1,EIF4E3,EMP1,EPSTI1,FGF13,FGFR1,FGFR4,FKBP9,FN1,FOXO1,FUT10,G6PD,GAS6,GAS6-DT,GPR68,GRN,HK2,IFI16,IFI27,IFI6,IFIT3,IFIT5,IGSF11,IL6,IL6ST,IL7R,INAFM2,INSR,JADE2,JUP,KIF16B,KIF23,KIT,LCK,LEPROT,LHFPL2,LIG4,LMO2,LRP1,LYN,MAN1C1,MGLL,MMP14,MYO1B,NCAM1,…	1568 (14)
miR-335-3p (miRNAs w/seed UUUUCAU)		mature microRNA	Activated	2.4	6.75e-06	ADAMTS14,ADAMTS15,ADAMTS2,COL1A1,COL4A1,COL4A2,COL4A5,COL5A1,COL8A1,LAMC1,LOXL2,NID1,NID2,P3H1,PDGFA,PDGFB,PLEC,PLOD2,SPARC,TGFBR2,VCAN
SFN	-7.233	other	Inhibited	-2.142	6.75e-06	AMOT,CDH1,CDH2,CTNNB1,DSC2,DSG2,DSP,ERBB2,F3,FKBP5,IL1R1,JUP,KRT18,KRT8,NET1,PDK4,SGK1,SNAI2,TJP1,VIM,ZEB1	2517 (15)
CCN5	-7.068	growth factor		-1.245	6.91e-06	AXIN2,CCN2,CD24,CDH1,CLDN1,CTNNB1,DSP,ERBB2,FN1,FOXA1,HIF1A,IGFBP7,ITGA5,JUN,JUP,KRT18,KRT8,LPL,PDGFA,PPARG,SDC4,SLC2A4,SMAD3,SNAI2,SPARC,TGFB1,TGFBR2,TGFBR3,TWIST1,VIM,XBP1,ZEB1,ZNF423	1951 (19)
CREB1	-0.804	transcription regulator	Inhibited	-4.161	7.5e-06	ABCA1,ADM,AKAP1,AKT3,ALOXE3,APOLD1,ARC,ARFGEF3,ARHGAP35,ARL15,ARPC3,ATF5,AURKA,BAG3,BCL2L1,BDNF,BHLHE40,BIRC5,CACNA1C,CACNA2D1,CALCB,CAMK4,CAMKK2,CAMKV,CAPN5,CARS1,CCK,CCN1,CCNA1,CCNB1,CCNB2,CCND1,CCND3,CD9,CDA,CDCA8,CDH10,CDH13,CDH2,CDH8,CEBPB,CEBPD,CGREF1,CIART,CLMP,COCH,COL24A1,CPD,CPT1A,CREB1,CRIM1,CRMP1,CRYM,CXCL2,CXCL8,CXCR4,CYFIP2,DGKA,DUSP1,DUSP14,ECEL1,ECM1,EDIL3,EDN1,EGR1,EHD4,ERC2,ERRF…	2224 (19)
PRKCI	-1.07	kinase		-0.218	7.51e-06	ABCC8,CCND1,CLDN4,COPB2,CXCL2,CXCL3,ECT2,ELF3,EZR,GMFB,HK1,HK2,HMOX1,IL1A,IL6,KCNJ11,PLS1,PRKCI,PTGS2,SF3B1,SLC2A1,SLC2A4	1879 (14)
TET3	-0.662	enzyme		-1.004	8.09e-06	ACSL1,ADAMTS9,ADCY9,APLN,CTNNB1,EPAS1,FGF5,FOXG1,GATA4,GSS,ISL1,KLF9,LAMC3,LRP2,MGAT5B,NKX2-5,PAX6,PHOSPHO1,SLC12A8,SLC43A2,SOX2,SYNE3,TGM2
PI3K (complex)		complex	Inhibited	-3.25	8.3e-06	ABCA1,ABCC4,ADAM12,ADIPOR1,ADRB2,AKT1,ALOX5AP,APLN,ATF4,ATG5,BAK1,BBC3,BCL2A1,BCL2L1,BIRC3,BIRC5,CASP3,CCN2,CCNB1,CCND1,CCND3,CD274,CDH1,CDH2,CDKN1B,CDKN2B,CEBPB,CFLAR,COL1A1,CREB1,CTSD,CXCL8,CXCR4,DAPP1,DKK1,DLL4,DUSP1,E2F1,ETS1,FABP5,FBLN5,FBXO32,FHIT,FN1,FOSL1,FOXO1,FRY,G6PD,GATA2,GCLM,GLI1,GLI2,GSTP1,HAS3,HBEGF,HIF1A,HIF1AN,HK1,HK2,HMOX1,ICAM1,IFIT1,IGF1R,IGFBP2,IL1B,IL23A,IL6,IL7R,IRF2,ITGA6…	2275 (15)
HOXA9	3.987	transcription regulator		0.699	8.61e-06	ADGRG1,AHCYL1,ARF1,ARHGAP11A,ARPC5,BCL7A,BMI1,BRCA2,CBX6,CDC6,CDH1,CDK17,CDK7,CELF2,CLCN7,CLTC,CREB1,CSNK1A1,CTH,DLGAP5,DYNC1LI2,ENPP1,EPS8,ETS2,FXR1,FZD5,GATA2,GFI1,GLRX,GMNN,GTPBP1,HIGD1A,HIRA,HNRNPU,HOXA9,HOXB2,HOXD10,HOXD11,HOXD13,IER2,IL7R,IRX6,ITGBL1,JUN,JUNB,KIF20B,KIT,KRT18,LAT2,LYN,MAFB,MAN2A1,MAP4K5,MBNL1,MED13,MSI2,NEB,NLK,PCDH1,PCMT1,PIM1,PPP1R16B,PRKD3,PTPRG,RAP1B,RBBP6,RDX,RPL27A,SA…
TWIST2	-1.895	transcription regulator		0.051	8.81e-06	BCL11A,BIN1,BMI1,CCND1,CD24,CDH1,CDH2,CDKN2D,CTNNB1,DUSP5,DUSP6,FBLN5,FN1,HOXB9,IL1B,KLF6,MAF,OSGIN1,SNAI2,SOX2,TERT,TGFB1,TWIST1,VIM,ZEB1,ZEB2	1932 (16)
DSCAML1	-0.36	other	Activated	3.394	9.26e-06	ANK3,BMP6,CNTN1,CNTNAP1,DCLK1,EGFR,EMX1,ETV5,FRK,GABBR2,ID3,KIF17,KLF9,LHX4,LHX9,MAPT,MICALL2,MYT1,NEFH,NGEF,NLGN2,NRCAM,NRN1,NTN4,NTRK2,PAX2,PCDH17,PDGFA,PDGFB,PLCB1,PRKCH,RACK1,RARB,RIMS3,ROBO2,SEMA3F,SEMA4G,SEMA7A,SHANK1,SHANK2,SLC29A4,SNAP91,SNCAIP,SOX21,SOX6,TAC1,TUBA4A,TUBB4A,UNC5A,WNT7B
silibinin		chemical drug		1.346	9.29e-06	BBC3,BIRC5,CASP3,CCN2,CCNB1,CCNC,CCND1,CDH1,CDH2,CDK1,CDK2,CDK6,CDK8,CDKN1B,CTNNB1,CXCL8,EGR1,FLT1,FN1,GSK3B,HIF1A,IGF1R,IGFBP3,IL6,KRT18,MCL1,MMP2,NFATC1,NFE2L2,NFKBIA,NOS2,PLAU,PLAUR,PTGS2,SNAI2,TIMP2,TP53,VEGFA,VIM,XIAP,ZEB1,ZEB2	1457 (15)
FOXC2	3.076	transcription regulator		0.03	9.87e-06	ADD1,ADRB2,CASP3,CDH1,CDH2,CDKN1B,CFD,CTNNB1,CXCR4,DKK1,EFNB2,FN1,INSR,IRS1,IRS2,ITGB5,LEF1,LFNG,LIPE,LPL,MET,MMP2,NOTCH1,PPARA,PPARG,PPARGC1A,PRDM16,PRKAR1A,PTGS2,RUNX2,SLC2A4,TBX1,TCF15,TP53,VIM,WNT5A	2027 (19)
cycloheximide		chemical reagent		-0.26	1.01e-05	ABCB1,ACOX1,ACTB,ADCY1,ADM,AGTR1,AHR,APP,AREG,B2M,BAD,BCL2L1,BDKRB1,BDNF,BEX3,BIRC3,BMP1,CALR,CAT,CAV1,CCK,CCN1,CCN2,CCND1,CCND3,CD8A,CDKN1B,CDKN2D,CEBPB,CEBPD,CFLAR,COL1A1,COL2A1,COL5A1,CSF1,CSF2,CTNNB1,CXCL1,CXCL2,CXCL3,CXCL8,CXCR4,CYP24A1,DTYMK,DUSP1,EDN1,EGFR,EGR1,EIF4B,FAS,FGF2,FGFR1,FN1,FOSL2,FST,GADD45A,GADD45B,GAS7,GBP1,GCLM,GNAI1,GNAI2,GNAI3,GREB1,HBEGF,HIF1A,HMOX1,ICAM1,IFIT1,IGFBP2,IGF…	1969 (13)
ritonavir		chemical drug		0.851	1.01e-05	ABCB1,ABHD2,ARHGEF19,ATP2B1,AXIN2,BCL2L1,BIRC5,BMP1,CARS1,CCDC74B,CCNJ,CD59,CDCA7L,CEP135,CEP70,CFL1,CSF2,CTNNAL1,CXCL8,DHCR7,ECT2,EEF1AKMT2,ELAVL1,EPHA1,FDFT1,FDPS,FGFBP1,FGGY,GBP2,GRK3,HUNK,ICAM1,IDI1,IFRD1,IKBKE,IL1B,IL6,KIF14,LAMA3,LDLR,LIPE,ME1,MET,MME,MSMO1,MVK,NAGK,NCAPH,NEIL3,NUF2,OSBP2,PFAS,PLEC,PPARG,PYROXD1,RACGAP1,SLC39A10,SPOCD1,SQLE,SREBF2,STIL,STYX,TESMIN,TGIF2,TMEM140,TMPRSS4,TSC2…	2072 (18)
MYOC		other		-0.572	1.04e-05	ANXA1,CARD10,CHRDL1,CHRM3,CLDN7,CNP,DLG1,DLX5,DPP7,EBF3,ENPEP,EPHA2,ESRP1,FBN1,FBXO32,FN1,HHIP,HOXA7,HSPA5,IGFBP5,IGFBPL1,ITGB1,JDP2,LAMB1,LAMC1,LHX8,LY6K,MAFK,MBP,NBN,NEFM,NOL3,PHLDA2,PTEN,PTGER4,QKI,RAB27B,RGS17,RHBDF1,RUNX2,SESN2,SLC7A11,SOX3,SP100,SPP1,STC2,TGIF1,UPP1,VAPA	2071 (19)
AREG	-8.517	growth factor		-1.243	1.04e-05	AREG,ARHGAP11A,BCL2L1,BIRC5,C10orf55,C3,CCNB1,CCNB2,CCND1,CCNF,CDC45,CDCA8,CENPA,CENPF,CXCR4,DESI2,EGFR,EGR1,ELF3,FOXM1,GBP1,H2BC12,HAS2,HJURP,IFI6,IFIT2,IFIT3,IL6,IQGAP3,ITGB8,JUN,KIF14,KIF20A,MKI67,NIPAL4,NPPC,OSCP1,PLAU,PLK1,PTAFR,PTBP2,PTGS2,RRM2,RUNX1,SLC36A1,SSBP1,SSRP1,TMC6,TOP2A	2460 (17)
MRTFB	0.033	transcription regulator	Inhibited	-3.338	1.09e-05	ACTB,ACTG1,ADM,AK5,AMOTL2,ANKRD1,ANLN,BBOX1,BCL2L1,CALD1,CBFB,CCN1,CCN2,CD177,CD24,CDC42EP3,CDK2,CLDN15,CNN2,COL25A1,COL3A1,CRIM1,CXCR4,DDAH1,DIAPH3,EDN1,EGR1,EPPK1,ETV6,EYA2,F11R,FILIP1L,FLNA,G0S2,GADD45A,GFI1,HLA-A,ID1,IGFBP5,ITGA5,ITGA6,ITGB1,KAZN,LIMCH1,LMNA,LOXL1,MAFK,MAPK13,MTMR10,MYH10,MYH9,MYL9,NFKBIZ,NREP,OSCP1,P2RY1,PCDH18,PDGFRL,PTGS2,RAB27B,RAMP1,RHOBTB1,RUNX1,SAMD5,SCARB1,SDC2,SELENO…	854 (8)
DUSP1	-1.366	phosphatase		-0.43	1.1e-05	AACS,APOL6,ATP2A1,BMP2,CCN5,CMPK2,COL3A1,CSF2,CXCL1,CXCL2,CXCL3,CXCL8,DKK1,DUSP1,DUSP6,EGFR,ELOVL3,FOSL1,GDF15,HELZ2,ICAM1,IER3,IFIT1,IFIT3,IL12RB2,IL1A,IL1B,IL6,IRF1,ISG20,JUN,LUM,MGLL,MX1,MXD1,NOS2,NRP1,OLR1,PAQR7,PARP1,PDGFA,PDGFB,PEX11A,PIK3R1,PLAUR,PLIN2,PNRC1,PRDM1,PTEN,PTGS2,PTPRK,SERPINB2,SOD2,STAT5A,SYNPO,TGFB2,THBD,TLR2,VEGFC,VNN1,ZFP36	1401 (14)
STAT1	-2.676	transcription regulator	Inhibited	-6.973	1.1e-05	ABCA1,ALDH1A3,APOBEC3B,APOL6,AXL,B2M,BAD,BATF2,BCL2L1,BIRC5,BST2,BTNL9,C1R,C1S,C3,CALHM6,CAND2,CAPN1,CASP1,CASP3,CASP4,CASP6,CASP8,CCND1,CCND3,CD14,CD274,CDK2,CDKN1B,CEACAM1,CEBPD,CLIC5,CMPK2,CSF2,CTSS,CXCL11,CXCL2,CXCL3,CXCL8,DDX60,EDN1,EGLN3,EGR1,EIF2AK2,EPSTI1,FAS,FGF2,FOXO1,FURIN,GBP1,GBP2,GBP3,GBP4,GBP6,GCK,GREB1,HAPLN3,HERC6,HEY1,HIF1A,HLA-E,HTRA1,ICAM1,IFI16,IFI27,IFI35,IFI44,IFI44L,IFI6,I…	2388 (19)
trovafloxacin		chemical drug	Inhibited	-3.184	1.14e-05	ADRB2,B2M,BHLHE40,BIRC3,CHFR,CSF2,CXCL2,CXCL3,DNAJB2,EGFR,ERRFI1,ETS2,GNPNAT1,HLA-A,HMOX1,ICAM1,IL6,IRF1,ISG20,JUNB,LDLR,MAP3K8,MLXIPL,MYD88,NEDD4L,NFKBIA,PHLDA1,PTEN,PTPN2,RDX,SOCS2,SOCS3,SOD2,STAT3,TGIF1,TGM2,TNFAIP3,UBE2I,VEGFA,XIAP	1435 (11)
TGM2	-6.224	enzyme	Inhibited	-7.166	1.14e-05	ADGRE2,AFF2,ALPL,BCL2A1,BIRC3,C3,CCDC169,CCND1,CDCA7,CDK6,CEACAM1,CFLAR,COX11,CXCL8,CXCR5,CYP4F3,DAAM2,DAPK2,DDX60,DDX60L,DHX33,DLEU1,E2F5,EHD1,FERMT1,FN1,GM2A,HIF1A,HIP1,HLA-B,HTT,IFI35,IFI6,IFIT1,IFIT2,IFIT3,IFIT5,IGF1R,IL1B,IL6,IRF9,ITGA6,LGALS9,LRRK2,MAFB,MDN1,MIR17HG,MMP2,MORC2,MPP6,MSX2,MT2A,MYO9A,NCF2,NPC2,OAS1,OAS2,OAS3,OASL,PAK1,PARP9,PHLDA1,PIM1,PLAAT4,PLSCR1,PNRC1,PPP1R16B,PTGES,PTGS1,…	1405 (12)
maslinic acid		chemical - endogenous non-mammalian		1.789	1.17e-05	ACTN1,ADAM17,AKT1,APPL1,BCL2L1,BID,CAMK2G,CCND1,CD47,CDH1,CDK6,CEBPB,CFL1,ELP1,ETS1,FBXW5,FLOT2,FZD7,GPRC5A,GRB2,GSK3B,IL6ST,IRAK1,ITGA3,JUNB,LIMK2,MAPK14,MSH6,MSN,NFKBIE,NOS2,PIK3R1,PLAUR,PPARD,PRKAR2B,PRKCI,PTGS2,PTPA,PXN,SHC1,SLC1A3,SORBS1,TGFB1,TLN1,TP53,WNT5A,YWHAE,YWHAG	1083 (12)
CCN1	-6.526	other	Inhibited	-2.699	1.17e-05	BAD,BCL2L1,BOK,C3,CCN1,CCND1,COL1A1,CTNNB1,CXCL2,CXCL3,CXCL8,DVL2,FBXW2,FN1,FZD7,FZD8,HIF1A,IL18,IL1A,IL1B,IL6,IL6ST,ITGA2,ITGA3,ITGA5,ITGAV,ITGB1,MCL1,MIF,MMP2,MSX1,MSX2,NLK,NOS2,NR4A1,PLAU,PTGS2,TCF7L1,TGFB1,TIMP1,TIMP2,TLE1,TP53,VEGFA,VEGFC,WNT5A,WNT7B,XIAP	1912 (15)
MAP2K1	-0.879	kinase	Inhibited	-3.214	1.17e-05	ABCB1,ABCC1,ADGRG1,AHR,ANKRD1,AREG,AXIN2,BAD,BCL2A1,BCL2L1,BIRC2,BIRC3,CALCB,CCN1,CCN2,CCND1,CD274,CDH5,CDK2,CDKN1B,CDKN2B,CFLAR,COL1A1,COL3A1,CRIM1,CSF2,CSTA,CTSB,CXCL3,CXCL8,DKK1,DUSP1,DUSP5,DUSP6,E2F1,ETV5,F3,FGF2,FLNA,FOSL1,FURIN,GLI2,GPRC5B,HIF1A,HSPA5,IGF1R,IL1A,IL6,IRS1,ITGA5,ITGB1,ITPR1,JUN,JUP,LDLR,LEF1,LGALS3,MBP,MITF,MMP14,MMP2,NET1,NFKBIA,NOS2,NOX5,OLIG2,PIM1,PLA2G4A,PLAUR,PTGS2,RAB38…	1788 (14)
ST1926		chemical drug		-1.44	1.2e-05	ACTB,AK2,AKR1B1,AMH,AP2M1,AP2S1,ARF1,ARPC2,ARPC3,ARSA,ATP5F1B,ATP5PF,CCT3,CEBPB,CFL1,CLIC1,COX6C,COX7B,COX7C,EEF2,EIF3D,EIF3G,EIF3I,EIF4A2,EIF4B,FKBP5,HIC1,ILF2,IMP3,ITM2B,LGALS1,LSM3,MAN1B1,MEN1,MGST1,MOB1A,NACA,NARS1,NKX2-5,NOP10,NPM1,PABPC1,PDIA3,PFN1,PSMD3,PSMF1,PURB,RBX1,RPL13,RPL18A,RPL24,RPL29,RPL32,RPL36A,RPL39,RPL6,RPL8,RPLP1,RPS15,RPS2,RPS27,S100P,SAP18,SKP1,SNRPD2,SOD1,SRSF3,SSBP1,ST13…
HNF1B	-9.823	transcription regulator		-1.229	1.21e-05	ACADVL,ACTN1,ACVR1,ANXA4,AXIN2,BGN,BHLHE40,CCDC80,CD99,CDH1,CDK1,CLDN1,CLDN7,COL5A1,CTNNB1,CXCL1,DST,DUSP1,EPS8,EXT1,F11R,FBLIM1,FGB,FN1,FZD2,GATA6,HNF4G,ID1,ID3,ID4,IGFBP3,ITGA3,JAG1,LAMB1,LUM,MAFB,MET,MMP2,MPZL2,MUC4,NID2,NR5A2,OCLN,PCSK9,PDX1,PDZK1IP1,PKD1,PKHD1,PLAU,PLAUR,PMP22,PTPRM,S100A3,S100A4,S100P,SEMA3C,SERPINA1,SERPINH1,SNAI2,SPARC,SULF1,UPP1,ZEB2	836 (7)
bromodeoxyuridine		chemical drug	Inhibited	-5.028	1.25e-05	BMP3,BMP7,CSF1,CXCL8,F3,GSTP1,IFI16,IFI27,IFI44,IFI6,IFIH1,IFIT1,IFIT2,IFIT3,IFITM1,IGFBP3,IGFBP4,IL1A,IL1B,IL24,IL36G,IL6,IL7,IL7R,IRF1,IRF7,ISG15,MX1,OAS1,PML,SP110,STAT1,TGFA	2310 (18)
CDH1	-6.367	other		-0.206	1.32e-05	ACTB,ALPP,BIRC2,BIRC5,BMP4,BMP7,CCND1,CDH1,CDH2,CDH3,CTNNB1,CTNND1,DDB1,EGFR,EIF4EBP1,ERBB2,ERBB3,ERBB4,FN1,FOSL1,GLI1,GLI2,IFI27,IFITM1,IGFBP3,JUN,JUP,KRT18,MCAM,MMP14,NCAM1,OCLN,PFKFB3,PIK3R1,PLAUR,PTEN,RALA,S100A4,SNAI2,SOX9,TGFB1,TPBG,VEGFA,VHL,VIM,XIAP,XPC	2433 (17)
TFAP2C	-2.014	transcription regulator		0.267	1.34e-05	ADA,AIFM1,ALCAM,ANLN,ANTXR2,CCN2,CDH1,CDX2,EGFR,EOMES,ERBB2,FBXW7,FKBP4,FOXA1,FOXC1,FREM2,FST,GREB1,HK1,IGFBP5,JAG1,KRT8,KRT81,KRT86,MAGI3,MBP,MMP14,MMP2,MT1F,MT2A,NRP1,PITX2,RASA1,SEMA3B,SLC19A1,SOD2,TACC1,TGFA,TIMP1,TK1,TNFAIP3,XBP1,ZMYND11	2296 (17)
MET	-2.464	kinase		-1.961	1.41e-05	AKT1,AQP3,AREG,AURKA,BMP1,CAMK2B,CCND1,CD274,CDH1,CDH2,CDK1,CDKN1B,CLDN1,CLDN23,CTSV,CXCL1,CXCL8,E2F5,EDN1,FBXO32,FN1,GLIS1,HBEGF,HIP1,HLX,HMOX1,HSPB1,IL15,IL15RA,IL18,IL1B,IL6,ITGA3,ITGB1,JAG2,JUN,LAMA3,MMP2,NFKBIZ,NREP,PERP,PIM1,PIM3,PLK1,PLK2,POU5F1,PTGS2,PTPN1,RUNX1,SH3BP5,SLCO3A1,SOCS3,SOD1,SOD2,SOX2,SPP1,TCHP,TGFA,TGFB1,TGIF1,TLR3,TRIM21,TSC22D1,VEGFA,VEGFC,VIM,ZEB2	1964 (15)
FLT1	11.253	kinase		-0.075	1.48e-05	ACTN4,ADD1,APLP2,BCL7B,BIRC5,BSDC1,CANX,CAPN2,CCNI,COL2A1,CSNK2A1,DLL4,EIF4B,EPAS1,FLNA,HK1,HLA-B,HMOX1,ICAM1,IGF2BP3,LAMP1,LIMS1,LIN7C,MAP3K7,MARCKS,MAX,NOTCH1,NRP1,NRP2,PRKAR1A,RALB,RBBP4,RDX,RNF125,SCRN1,SDHC,SMARCA4,SNAP23,SOX9,TCF4,TGFBR2,TNIP1,TOMM22,UBE2B,UBE2H,YWHAZ	1717 (17)
STK11	0.089	kinase	Activated	2.306	1.51e-05	ACVR1,ADGRE2,ADSL,AK2,ALCAM,ALDH9A1,ASPHD2,ATP5F1C,ATP5F1D,ATP5MC1,ATP5MC2,ATP5MC3,ATP6V0E1,BCL6B,BCL7B,BTF3,CCND1,CD274,CDH1,CDH8,CDKN1B,CNTN1,COL3A1,COX5A,CPS1,CREBL2,CTNNB1,CTSD,CYC1,DCTPP1,DOCK4,ELOVL2,ENOPH1,ETV4,FN1,FOSL1,GADD45A,GADD45B,GALM,GAPDH,GART,GFI1,HIF1A,HILPDA,HIRA,HOXC11,ID1,IGFBP5,IL1A,IL1RAP,IL6,IMPDH2,ITGB3BP,JUNB,KCNQ2,KLF12,KLHL29,LUM,LYPD3,MAFK,MCAM,MDH2,MMP2,MPST,MRI1,NAP…	2444 (17)
SMAD3	-2.007	transcription regulator	Inhibited	-3.792	1.51e-05	ADAM12,ALPL,ANKRD1,AREG,ARID3A,ATF4,AXIN2,BGN,BMP2,BMP6,C3,CCN2,CCND1,CD59,CDH1,CDH2,CDH5,CDKN2B,CKS1B,COL1A1,COL2A1,COL3A1,COL6A1,COL7A1,CTNNB1,CXCL3,DAPK1,DDB1,DEPTOR,DOCK4,DUSP4,EDN1,EGR1,ENG,FBN2,FDFT1,FN1,FST,FSTL3,FZD8,GADD45B,GLI1,GLI2,HAS2,HBEGF,HEY1,HMOX1,HSP90B1,HSPA5,ID1,ID3,IL11,IL15,IL1B,IL23A,IL6,INPP5D,ITGB1,ITGB5,JAG1,JAM2,JUN,JUNB,LINC00842,LPAR1,LUM,MAX,MBOAT2,MEF2D,MSX2,MXD1,NE…	2069 (16)
TNFSF11	-1.815	cytokine	Inhibited	-4.834	1.51e-05	ACP5,AHR,AK3,AURKA,BCL2A1,BCL2L1,BMP4,CAPN2,CAV1,CCND1,CCND3,CD14,CDC42EP4,CDKN1B,CIAO1,CKB,CLEC11A,CLOCK,CSF1R,CSRP1,CTNNB1,CUL4A,CXCL2,CXCL3,CXCL8,DUSP1,DUSP16,ECT2,EHD1,ELP2,ETS1,F3,FAS,FHL2,FOSL1,FOXM1,FOXO1,FRRS1,GABPA,GADD45B,GLRX,GPR68,GRB10,GRN,HMOX1,ICAM1,IER3,IFRD1,IKBKE,IL11,IL13RA1,IL15,IL15RA,IL1A,IL1B,IL6,ILF3,IRF8,ITCH,ITGA5,ITGAV,ITPKB,JDP2,JUN,JUNB,KDM8,KEAP1,LIMK1,LSR,MAFB,MAP2K…	2001 (13)
PRKCD	0.9	kinase	Inhibited	-3.776	1.51e-05	ABCA1,ALOXE3,ARHGAP32,ARID3B,BCL2A1,BCL2L1,BIRC2,BIRC3,BIRC5,C3orf52,CAMSAP1,CCND1,CEBPB,CEMIP,COL1A1,CSF2,CTNNB1,CTSB,CXCL12,CXCL16,CXCL8,DENND3,DUSP6,ETS2,FBN1,FOSL1,FOSL2,GDF15,GLI1,GPRC5A,GRHL2,HJURP,HRH1,ICAM1,ICOSLG/LOC102723996,IL1B,IL23A,IL32,IL6,ITPR3,JCAD,JUN,JUNB,KHDC1,KLF5,KLF6,LAMP1,LBH,LDLR,LIF,LIPG,MAST4,MCL1,MMP2,MSI1,MYO9B,NAV2,NEDD4,NFKB2,NFKBIA,NOCT,NOS2,NOTCH1,NOTCH2,NR4A1,OAS…	1784 (16)
ECSIT	0.79	transcription regulator	Inhibited	-3.61	1.55e-05	BCL3,CFLAR,CXCL8,HMOX1,IER3,IL1B,IL6,IRF7,JUNB,NFKB1,NFKB2,NFKBIA,NFKBIE,PIM1,PLAUR,PTGS2,RELB,SOD2,STAT5A,TNFAIP3	874 (11)
COL18A1	1.239	other	Activated	3.588	1.58e-05	BAD,BCL2L1,CCND1,CDC25B,CDH5,CTNNB1,EDN1,EFNA1,EFNB2,EGFR,EGLN1,EPHB1,EPHB2,EPHB4,ETS1,F2RL1,F3,FGF2,FGFR1,FN1,HIF1A,HIF1AN,HK2,ICAM1,ID1,ID3,IL18,IL6,ITGAV,JUN,JUNB,MAPK1,MAPK8,MAX,MCL1,MMP2,MXI1,NOS2,NRP1,PLAU,PTGS2,SP3,SPOCK1,STAT1,STAT3,TNFRSF1A,TNFRSF21,TUBA1A,VEGFA	1571 (18)
PPARG	2.791	ligand-dependent nuclear receptor		-0.19	1.64e-05	ABCA1,ABCA3,ACADL,ACADM,ACADS,ACLY,ACOX1,ACSL1,ACSL4,ACSL5,ADIPOR2,ADRB2,ALDH1A2,ALDH9A1,ANGPTL4,APP,AQP3,ARL4D,ASAP1,ATP2A2,ATP6V1D,BCL2L1,BDH1,BIN1,BIRC5,C3,CAT,CAV1,CAV2,CCN2,CCND1,CCPG1,CD274,CDH1,CDK2,CDK6,CEBPB,CFD,CGB3 (includes others),COL1A1,CPT1A,CPT2,CRABP2,CRAT,CREB1,CTNNB1,CXCL1,CXCL2,CXCL3,CXCL8,CYCS,CYP26A1,DGAT1,DGAT2,DGKA,DHRS3,EDN1,EGFR,EGLN1,EGLN3,EIF4EBP1,ELOVL3,EPAS1,ERO1A,ES…	2124 (18)
PKNOX2	9.564	transcription regulator		0.399	1.66e-05	BBC3,CDH1,EGR1,FAS,GADD45A,HDAC1,IGFBP5,MDM4,PIDD1,RPRM,SNAI2,STAT1,TP53,TP73,VIM
pituitary adenylate cyclase-activating polypeptide		biologic drug		-1.172	1.69e-05	ACER2,ADGRL2,ADM,ARHGAP32,AXIN2,BAMBI,CCND1,CCND3,DPYSL3,DUSP6,EGLN3,EGR1,EPHA4,ERRFI1,ETV4,FOSL1,FRRS1,ITGA1,MACROD1,MMD,NKD1,PLK2,SELENOT,SEMA6D,SLC41A2,SMIM3,STOM,WNT4	770 (7)
1,2-dithiol-3-thione		chemical reagent	Inhibited	-2.545	1.71e-05	ABCC3,ACSL5,ACTG1,ARF1,B4GALNT1,CA11,CCT3,CCT7,CDC34,CHORDC1,COQ7,CTSD,CUL1,DHCR7,DNAJB11,DNAJB9,DNAJC3,DSTN,EIF2S1,EIF3C,EIF3D,EIF3G,EIF6,EPB41,EPHB4,ESD,ETV6,FKBP5,FTH1,GBE1,GCLM,GHR,GNA11,GSPT1,GSR,GSTP1,GSTT2/GSTT2B,HACD3,HAX1,HM13,HMOX1,HPRT1,HSP90B1,IDE,IKBKG,LGALS8,LMNA,LPL,M6PR,MCFD2,MGLL,MORF4L2,MSMO1,NARS1,NCKAP1,NFE2L2,NOCT,NQO1,NUCB2,PDIA3,PFN2,PPIB,PRDX1,PSAT1,PSMA7,PSMB2,PSMB3,PSMC1…	615 (7)
TGFB3	-0.869	growth factor	Inhibited	-3.353	1.77e-05	ADAM12,ADAM19,BHLHE40,CCN1,CCN2,CD46,CD59,CDH1,CDH2,CDKN1B,CDKN2B,CLDN11,COL1A1,COL2A1,COL3A1,COL5A1,ENG,ETS1,F2RL1,FGF2,FN1,FOSL2,HTRA1,IL11,ITGAV,JUN,LEF1,LTBP2,MICAL2,MIXL1,MMP2,MYO10,OCLN,PALLD,PLAUR,PLK1,PLOD2,PPARGC1A,PTAFR,PTEN,PTHLH,SERPINE2,SH3PXD2A,SKIL,SMAD2,SMAD7,SNAI2,SOX9,STAT6,TAGLN,TGFB1,TGFBR3,TIMP3,TJP1,TNC,TNS1,TPM1,VEGFA,XIAP,ZEB2	1872 (16)
tamoxifen		chemical drug		1.743	1.8e-05	ACOX1,ADM,AHNAK,ASAH1,ATF4,ATP5F1B,BCL2L1,BDNF,BID,BIRC5,BMP2,BMP4,C3,CASP8,CAT,CAV1,CAV2,CCDC80,CCN1,CCND1,CDH1,CDH2,CDK2,CDK6,CDKN1B,CEBPD,CENPK,CFLAR,CHTOP,COL1A1,CRYZ,CTSD,CXCL12,CXCL8,CXCR4,CYCS,DNMT3B,EGFR,EIF4EBP1,EPHA4,ERBB2,ERBB3,ERBB4,ESRRA,ETV4,ETV5,FAM83D,FHL2,FN1,FNDC4,G0S2,GAPDH,GCK,GDF15,GPER1,GREB1,HAS2,HIF1A,HOTAIR,HOXB7,HSP90B1,IER3,IFT140,IGFBP3,IGFBP4,IL6,IRF1,IRS1,ISG20,JUN,J…	2378 (18)
NFE2L2	-1.317	transcription regulator		-1.387	1.84e-05	ABCB4,ABCC1,ABCC3,ABCC4,ACSL5,ACTG1,AHR,AOX1,ARF1,ATF4,B4GALNT1,BCL2L1,BDNF,CA11,CAT,CCN2,CCT3,CCT7,CDC34,CDH1,CFD,CHORDC1,COL1A1,COL3A1,COL4A2,COQ7,CTSD,CUL1,CXCL2,CXCL3,CXCL8,DHCR7,DNAJB11,DNAJC3,DSTN,EIF2S1,EIF3C,EIF3G,EPAS1,EPB41,EPHB4,ESD,ETV6,FGF13,FKBP5,FN1,FTH1,FTL,G6PD,GBE1,GCLM,GHR,GNA11,GNAI2,GPX3,GSPT1,GSR,GSS,GSTA4,GSTO1,GSTP1,GSTT2/GSTT2B,HACD3,HAX1,HM13,HMOX1,HPCA,HPRT1,HSP90B1,HYO…	1576 (16)
Raf		group		-0.714	1.85e-05	AREG,CCND1,CDKN1B,DUSP4,DUSP6,E2F1,EDN1,EGR1,ETV5,FOSL1,GDF15,HAS2,IER2,IER3,IFI16,IGF1R,JUN,KRT18,MAFF,MANSC1,MCL1,PHLDA2,PLPP3,PMAIP1,PPARGC1A,PTEN,RARB,RND3,SEMA3C,SEMA6A,SH2B3,SLC43A3,SPRY2,SPRY4,STK17A,STON1,TAGLN,TFAP2C,TNFAIP3,TOP2A	2503 (21)
COLQ	4.761	other		1.817	1.85e-05	ADAMTS2,AGRN,BDNF,BGN,BMP1,BMP4,CHRNB1,CLSTN1,COL2A1,COL4A1,COL4A2,COL7A1,COL8A1,DMD,DOK7,DTNA,ECM1,EXT1,FBLN5,FN1,FRAS1,GPC1,GPC4,HSPG2,ITGA7,LAMA4,LAMB1,LARGE1,LTBP1,LTBP3,MMP16,MMP2,NID1,NID2,PRIMA1,SDC4,TGFB1,TIMP1,VCAN,WNT4
IRF7	-6.587	transcription regulator	Inhibited	-7.992	1.9e-05	ATF4,BCL2L1,BCL2L13,CALHM6,CARD16,CASP4,CCNA1,CMPK2,DAXX,DDX58,DHX58,GBP1,GBP3,GBP4,HELZ2,HERC5,IFI16,IFI35,IFI44,IFI44L,IFI6,IFIH1,IFIT1,IFIT2,IFIT3,IFITM1,IFITM2,IFITM3,IL12A,IL15,IL15RA,IRF1,IRF5,IRF7,IRF8,IRF9,ISG15,ISG20,JAK2,MAP3K8,MCL1,MICB,MX1,MX2,NMI,OAS1,OAS2,OAS3,OASL,PARP12,PDCD2,PHF11,PLAC8,PLSCR1,PMAIP1,PSMB10,PSMB8,PSMB9,PSME1,PSME2,RIPK2,RSAD2,RTP4,SAMD9L,STAT1,STAT2,TAP1,TAP2,TDR…	1155 (18)
IL4		cytokine		-1.762	1.92e-05	ABCA1,ABLIM1,ACOT9,ACOX1,ACP5,ACSL1,ACSL4,ACTB,ACTG1,ADAM17,ADAM19,ADAP1,ADRM1,AGFG2,AHCYL1,AHNAK,AHR,AK2,ALDH1A2,ALOX5AP,ANXA1,ANXA2,ANXA4,ANXA6,APOLD1,APRT,ARG2,ARNTL2,ASCC3,ATP2A1,B4GALNT1,BCL11A,BCL2L1,BCL3,BDNF,BHLHE40,BIN1,BIRC2,BIRC5,BOP1,BPGM,C3,CAPG,CARM1,CASP3,CASP6,CAT,CBFB,CCDC86,CCN2,CCND1,CCND3,CCT3,CD14,CD274,CD58,CD6,CD8A,CDK1,CDK2,CDK6,CDKN1B,CELF2,CENPB,CFLAR,CHD4,CHST3,CKAP4,CK…	2190 (15)
CX3CL1	1.907	cytokine		-1.634	1.94e-05	ALDH1A2,APCDD1,BCL2L1,BMP6,BMP7,CCNB2,CDCA7,CDHR1,COL3A1,CRABP2,CSF1,CXCL12,DLX1,DLX2,EFNB1,EFNB2,EGFR,EOMES,ERBB3,FABP5,FCRLA,FGF2,FZD2,GLA,GNB3,GPRC5B,GSN,GYG1,HEY2,HEYL,HIF1A,HMOX1,HPSE,ICAM1,IFI16,IFIT2,IFIT3,IL1A,IL1B,IL6,IL7R,IRF7,KIF26A,LAMC1,LDLRAD3,LGALS3BP,LMO4,LPAR1,MAP1B,MEIS2,MICOS10-NBL1/NBL1,MMP2,N4BP3,NDNF,PAX6,PDX1,PPARG,RHPN2,SALL1,SDK2,SPHK1,SPP1,SYT1,TFAP2C,TGFB1,TGFB2,TIMP1	1400 (13)
ACSL4	-1.147	enzyme		-0.573	2.02e-05	AUTS2,BAK1,CDC25B,CDKN2B,CFLAR,COL12A1,CTNNB1,DOCK5,EGFR,ENPP1,ERCC1,FERMT1,GDPD1,ICAM1,ITPR1,JAK2,KDM1A,KRT18,LAMB1,MYO5A,NFKB1,NT5E,PPARG,PRKG1,PTGS2,RHOU,SAT1,SPP1,STAT1,TFPI,THBD,WT1,XIAP,XIST	1619 (16)
TRAP1	1.921	enzyme		-1.363	2.08e-05	AK3,ALDH1L2,ANXA1,ARHGAP10,ATP5F1D,BCL2L13,BRIP1,C1QBP,CHEK1,CHML,CLDN12,COX5A,CRCP,E2F1,EARS2,ECSIT,ERBB2,ERCC4,GAPDH,GARS1,GFER,GNG2,GPT2,GRN,HIF1A,HSD17B10,HSPD1,ISCU,ITGB1,LSS,MAVS,MRPS31,NCAM1,NDUFB4,PKM,PPP2R2B,PTGS2,RAB38,RMI1,SLC35D1,SLC4A11,SMDT1,SOD1,SOX2,SRSF1,SYK,TMA16,TRADD,TXN2,VHL
ZNF217	-1.775	transcription regulator		0.435	2.09e-05	ADM,ANK3,ATAD2,ATP10D,CCNE2,CDKN2B,CENPK,CITED1,COL8A1,CREB5,CXXC4,EOMES,ERBB3,FRK,GAD1,GATA4,GPRC5A,HOXC6,IFI16,IGDCC3,IGFBP3,KLHL4,KRT18,MPZL2,MYCBP2,MYO1B,NEFL,NLGN1,NRXN3,OLIG2,PAK3,PAX6,PKP2,RAB22A,RGS20,SEC14L2,SEMA3A,SH3RF2,SLC6A15,SOCS2,ST3GAL6,ZHX2,ZNF367
2-amino-5-phosphonovaleric acid		chemical - other		0.544	2.14e-05	ADAM19,ADAMTS2,ANKRD37,ANLN,ARC,ATF4,BBC3,BDNF,BID,BSPRY,BTG3,BVES,CGN,CRCP,CYB561A3,DACT2,DCLK2,DOK7,DUSP1,DUSP6,EGR1,ELP6,EXT1,FHDC1,FOXO1,FURIN,GADD45A,GADD45B,GFRA1,GOLM1,HDAC5,HDAC9,ICOSLG/LOC102723996,IFRD1,JUN,JUNB,KPNA4,LBH,LHFPL2,LRPAP1,LSM11,MLST8,NAB1,NHSL1,NPY1R,NR4A1,NR4A3,NRN1,PHLDA1,PLEKHO1,PLK3,PTGS2,RASGEF1B,RASL11A,RELB,RIT1,RPS15A,RUNX1T1,SLC25A29,SLITRK3,SPRY4,STOML1,TCHP,TIMM…	2007 (19)
indomethacin		chemical drug		-1.976	2.19e-05	ABCA3,ABCD3,ACOT1,ACOX1,ACSL1,ADAM8,ANXA1,ANXA2,APP,ARG2,BCL2L1,BDNF,BIRC3,BIRC5,CAPN2,CBX4,CCNB1,CCND1,CD14,CDH1,CDKN1B,CEBPB,CLDN1,CLDN4,CPT1A,CTNNB1,CTSD,CXCR4,DGAT1,EFEMP2,ELF3,FBLIM1,FGB,FGF2,FLT1,FXYD5,GBA,GDF15,GTPBP4,HAS2,HIF1A,HMOX1,IER3,IFITM3,IL11,IL1A,IL1B,IL1R1,IL1RL1,IL6,INSR,KRT8,LDLR,LGALS3,LIMA1,LOXL2,LPL,LXN,MANF,MCM3,MMP14,MMP2,NGFR,NOS2,OCLN,P4HB,PIM1,PLA2G4A,PLAUR,PLIN2,PPARA…	1949 (13)
DETA-NONOate		chemical reagent		-0.515	2.2e-05	ADAM10,AKT1,BCL2L1,BGN,BIRC2,BIRC3,CA9,CAT,CAV1,CCND1,CXCL3,CXCL8,DGKA,DUSP1,FAS,FPGS,GLO1,HIF1A,HMOX1,ICAM1,IL6,IRF7,LOXL2,MICA,NOS2,PDE3B,PRKG1,PTGS2,TIMP1,TP53,TP73,TXNIP,XIAP	1784 (16)
thapsigargin		chemical toxicant	Inhibited	-2.863	2.22e-05	ABCA12,ABCB1,ACADL,ACADM,ADCY1,ADIPOR1,ADIPOR2,ARC,ATF4,ATG5,ATP2A2,BBC3,BCL2L1,BDNF,BIK,BIRC2,BIRC3,CA9,CALR,CAPN10,CAPN5,CAV1,CCND1,CEBPB,CHAC1,CLDN4,COL1A1,COL2A1,CPT1A,CREB3L1,CXCL2,CXCL3,CXCL8,DERL2,DNAJB9,EDN1,EGR1,EIF1,EIF4EBP1,ERBB2,ERLEC1,ERRFI1,ETS1,FN1,GADD45A,GADD45B,HIF1A,HMOX1,HSP90B1,HSPA1A/HSPA1B,HSPA5,ICAM1,IER2,IL1B,IL1R1,IL6,INSIG1,ITGA4,JUN,KPNA1,LAMP3,LBH,LIFR,LMAN1,MCL1,MEF2…	986 (11)
bexarotene		chemical drug	Activated	2.086	2.22e-05	ABCA1,ABCB10,ACOX1,ADRB2,AKR1C3,AKT2,ALCAM,ALDH1A2,AMOTL2,APP,AXL,BARHL2,BCL11B,BMP6,BMP7,BNIP2,CCK,CCN1,CCND1,CFD,CST3,CTH,CTNNB1,CTSH,CYCS,CYP26A1,DACH1,DHRS3,DKK1,DUSP1,DUSP5,EFNB3,EGFR,EIF1,EMX1,EPHA2,ERBB4,GARS1,GDNF,GNB2,GPM6B,ICAM1,ID1,IER2,IGFBP6,IL15,IL1B,ISL1,ITPR1,KLF10,LOXL2,LPL,LSM4,MAF,MAFF,MAP3K8,MLLT11,MPC2,NGFR,NKX2-1,NOS2,NRP2,NTRK2,NTS,PAX6,PCSK9,PIK3R1,PLAUR,PLOD2,PNRC1,PPARG,…	2312 (21)
PDX1	3.651	transcription regulator		-1.754	2.23e-05	ACTB,ACTG1,AKR1B1,ANXA2,ARL4D,ATF4,ATF5,ATG5,ATP2A2,ATP2A3,ATP5PF,BBC3,CAMK2N1,CAT,CCND1,CKB,CKMT1A/CKMT1B,COL1A1,COL25A1,COL3A1,CPT2,CRELD2,CROT,CXCL2,CXCR4,DUSP5,DUSP6,EFNA1,EGR1,EIF4EBP1,ELAPOR1,EPHB1,ERO1A,ERO1B,F3,FBXL17,FGF2,FGF5,FGFR1,FUT1,GCK,GCLM,GNG12,GRN,HK1,HSPA5,ID1,ID3,IER3,IGF1R,IGFBP3,IL1B,IL6,INSIG1,IRS2,JUN,JUNB,KLF10,KLF6,KRT18,KRT8,LTA4H,LXN,MAFA,MAN1A1,MAPT,MITF,NFKB1,NKX2-2,…	2247 (23)
CGA	6.285	other		-1.433	2.36e-05	BDNF,BEX4,BIRC2,CCND1,CLGN,CREB3L1,CRELD2,CTNNBIP1,CTSV,CXCL8,DNAJB11,DNAJB9,E2F1,EDEM2,ELAPOR1,ERLEC1,ETV5,FHL1,FKBP14,FKBP4,FOXO1,GATA2,GRB2,HOMER2,HR,HSBP1L1,HSP90B1,HSPA5,HYOU1,ID1,ISL1,KIT,KLF9,MMP14,MMP2,MXD4,PARM1,PDIA3,PPIB,PTGS2,SDF2,SDF2L1,SERP2,SGK1,SGTB,SHISA2,SIL1,STAT5A,TIMP2,TIMP3,TP53INP1,UGT1A1,XIAP,ZCCHC12,ZNF385B	2534 (24)
TEAD4	-0.3	transcription regulator	Inhibited	-2.223	2.39e-05	ADM,AK5,BBOX1,BMP4,CALD1,CAV2,CCK,CCN1,CCN2,CCND1,CCND3,CCNE2,CDK6,CDKN1B,CDX2,COL3A1,DGAT2,EDN1,EGFR,EOMES,FGFR1,FILIP1L,FLT1,HIF1A,IGFBP5,JUN,JUNB,KAZN,LIMCH1,LOXL1,MTMR10,NFKBIZ,NOTCH2,PCDH18,PDGFRL,PLK2,PPARG,RB1,RHOBTB1,SAMD5,SDC2,SH3BP4,SH3D19,SLC2A4,SLFN5,SULF1,TAGLN,TFAP2C,TLE1,TPM1,TRNP1,VEGFA	756 (7)
FOXO1	1.21	transcription regulator		-1.379	2.39e-05	ACLY,ACSL5,ADIPOR1,AFF3,AIFM2,AIP,ANGPTL4,ANLN,ANXA3,APLN,ATP5F1B,ATP5MC3,ATP5PF,ATP6V0A1,ATP6V1D,BANK1,BCL2A1,BCL2L13,BCL2L2,BID,BIRC3,BIRC5,BRIP1,CAMK4,CASP6,CASP8,CAT,CAV1,CCN2,CCNB1,CCNB2,CCND1,CCNF,CDC42EP3,CDH5,CDK1,CDKN1B,CDKN2B,CENPF,CERS4,CFLAR,COL1A1,COL2A1,COL4A1,COL4A2,COX18,CPT2,CTSE,CTSV,CXCL8,CYCS,DAPK1,DEPDC1,DLGAP5,EBF1,EDN1,EFHD1,EGR1,EIF4EBP1,ELOVL7,ENPEP,EOMES,FABP5,FAS,FBXO32…	1963 (19)
KDM3B	0.559	enzyme	Activated	2.475	2.63e-05	ABCA12,ANKRD13A,ARG2,AXIN2,C1R,CCN2,CKAP2,COLEC12,CORO1C,DAPK1,DEPDC1,DLGAP5,EFNB2,FKBP1A,FN1,GALNT2,GATA2,GTSE1,HJURP,IRS1,KIF26B,MAP7D1,MLLT3,NCAPG,NEDD4L,PALLD,PALMD,PPP3CA,PRUNE2,RACGAP1,SDCBP2,SH3BP4,SLC44A1,SORL1,SPAG5,STMN1,TMEM74B,TSHZ3,TSPAN7,ZIK1,ZNF772
IKBKG	-0.819	kinase	Inhibited	-4.141	2.78e-05	AMPD3,ATP2A2,BBC3,BIRC3,BMP2,C3,CDH13,CEBPB,CEBPD,CFLAR,CLDN23,CSF1,CSF2,CTSB,CTSF,CTSZ,CXCL12,CXCL2,CXCL3,CXCL8,DUSP6,ENPP2,EPAS1,FOXC2,FOXF2,GBP2,GBP3,GM2A,GRN,HIF1A,HK2,HLA-A,ICAM1,IFI16,IGFBP6,IKBKE,IL11,IL1A,IL1B,IL6,IRF7,ISG15,JUNB,KCNH2,KLF5,LIFR,NAGLU,NFKB2,NFKBIA,NID1,NOCT,NR6A1,PCDH7,PPARA,PPARG,PTEN,RABEP2,RELB,RYR2,SEMA3C,SERPINB2,SERPINE2,SGK1,SLC16A2,SLC5A5,SOCS3,TNFAIP2,TNFAIP3,VEG…	1759 (12)
HIC1	-1.448	transcription regulator	Activated	2.353	2.8e-05	ADRB2,AHNAK2,AMIGO2,CCND1,CCNE2,CYP24A1,EPHA2,FHL2,FST,GPR161,ID4,ITPR1,KAZN,KIAA0895,LGALS8,LIF,LRP8,MCAM,PLA2G4A,PLEC,PLPPR4,RIN2,SFXN3,SIRT1,SLC7A11,SMPDL3A,SNAPC1,SOX9,SPP1,TMEM47,TMEM62,TNFAIP8,TNS3,TRIM16,TRIM16L,WDR6	1015 (13)
TGFBR2	-2.97	kinase	Inhibited	-2.497	2.83e-05	ALOX5AP,ANGPTL4,ATF4,BDNF,BGN,BHLHE40,BIRC5,BMP6,CASP1,CCN2,CCND1,CCND3,CD14,CDH1,CDH2,CDHR1,CDKN1B,CDKN2B,CHRM3,CHRNA7,COL1A1,COL4A6,CTNNB1,CXCL2,DSG2,EXT2,FGF2,FGF5,FGF9,FN1,FST,GADD45B,GAL,GATM,GJB6,GLI1,GLI2,ICAM1,IL1A,IL1B,IL1RAP,IL6,ING1,JUN,JUP,KCNJ8,KRAS,KRT18,KRT8,LBR,MAN2B2,MAP3K11,MMP14,MMP2,MPHOSPH9,MYOF,NFIB,NIPA2,NOS2,NRP1,OSTF1,PDGFB,PITX2,PLAGL1,POU4F1,PTCH1,PTGES,PTGS2,PTHLH,RBMS…	2201 (16)
P38 MAPK		group	Inhibited	-3.803	2.85e-05	ABCA1,ADAM17,ARG2,BATF2,BBC3,BCL2A1,BCL2L1,BDNF,BGN,BIRC5,BMP2,CAV1,CCK,CCN2,CCND1,CCNF,CD46,CD82,CDH5,CDX2,CEBPB,CEBPD,CFLAR,COL3A1,CSF2,CTNNB1,CXCL1,CXCL11,CXCL12,CXCL2,CXCL3,CXCL8,CXCR4,CYP4F3,DDB2,DGKA,DUSP1,EDN1,EGR1,ETS1,F3,FAS,FBXO32,FGF2,FLNA,FN1,FST,GBP1,GDI1,GOLGA2,HAS2,HIF1A,HMOX1,HOMER1,HSPA5,HTRA1,ICAM1,ID3,IER3,IGFBP5,IL11,IL12A,IL1A,IL1B,IL1RL1,IL23A,IL32,IL6,IRF6,IRF7,ITGA4,ITGAV,…	1370 (13)
SOD1	1.198	enzyme	Activated	2.065	3.02e-05	ACTB,APP,ARC,ASL,ATF4,B2M,BAD,BAG3,BCL2L1,BID,BMP4,CACNB4,CALCB,CASP1,CASP3,CASP4,CAST,CCNC,CCND1,CD14,CDH2,CDK5,CFLAR,CGB3 (includes others),CKB,COL1A1,CREBBP,CSF1R,CTNNB1,CYB561,DCXR,DPYSL3,DSG3,ETS2,EZR,FAS,FGFR1,FOSL2,FTH1,GCLM,GDF1,GDNF,GNB1,GNG4,GNG5,GNG7,GPX3,GSTP1,HCN2,HDDC3,HMOX1,HOMER1,HPCAL1,HSBP1,HSPA4,HSPA8,HSPB1,HSPB8,ICAM1,IL15,IL1B,IL6,JPT1,JUN,JUNB,KCNS1,LIMK1,LPL,LRRTM4,MCL1,MET…	2024 (13)
mir-15		microRNA		-1.386	3.29e-05	APP,BCL2L2,BIRC5,CARM1,CCND1,CD82,CDK6,CDK7,CHEK1,DDX58,EGFR,FGF2,HSPA1A/HSPA1B,IFIT1,IL1B,IL6,ISG15,LAMP1,LATS2,MAPK3,MCL1,MX1,OAS1,PIM1,PLAUR,PPM1D,PTGS2,RAF1,RECK,RNF125,SIRT1,SMURF2,SOX5,TFAP4,TIMP1,TP53,UCP2,WEE1,WNT3A	1401 (14)
HDAC1	0.463	transcription regulator		-1.575	3.29e-05	ABCB1,ALCAM,AMPD3,ARC,ASCL2,ATG5,AXIN2,BAMBI,BBC3,BDNF,BRCA2,CCNA1,CCNB1,CCNB2,CCND1,CCNE2,CDC25A,CDC6,CDH1,CDK1,CDK2,CDKN1B,CDT1,COL1A1,COL2A1,CSF1R,CXCL8,DAB2IP,DENND2B,DHFR,DUSP1,E2F2,EGFR,EGR1,EHMT2,EPGN,FAS,FLT1,FOXM1,GLI1,GSK3B,GSTP1,H2AX,ID1,IL24,IL6,LGR5,LMO2,MCM10,MCM3,MCM5,MCM7,MEF2C,MME,MUC4,NASP,NCR3LG1,NEFH,NFATC1,NFKBIA,NKD1,NKX2-5,NOS2,PAX2,PAX3,PCYT1A,PDGFA,PDGFB,PFKFB3,PLAU,PLK1,…	2380 (22)
glutamine		chemical - endogenous mammalian		0.624	3.37e-05	AARS1,ACTB,ADA,ATF4,ATF5,ATG5,CARS1,CCND1,CEBPB,COL1A1,CXCL1,CXCL8,DUSP1,EIF2B4,FABP5,FN1,GADD45A,HIF1A,HK1,HSBP1,HSPA1A/HSPA1B,HSPA5,ICAM1,IGFBP2,IL15,IL6,IRF2,JUN,JUNB,MCL1,NFKB2,NFKBIA,NGFR,NR4A1,NUP98,PDGFB,PICK1,POU5F1,PPARGC1A,PPP2R2A,PTGS2,PYCR1,SLC16A1,SOX2,SRSF1,THBS2,TIMM17A,TP53,TUBB4A,VCP,VEGFA,VIM,WT1,XBP1,ZMYND8	1314 (17)
glucagon		biologic drug		0.247	3.41e-05	AHNAK,ANK3,ARFGEF2,CARD14,CGNL1,CTNNB1,DISC1,EIF4B,GNG12,GOLGB1,IRS2,KIF26A,LIMA1,LMNA,MME,MTFR1L,NR4A1,NR4A3,PALM,PHLDB2,PLXDC2,PPP1R1A,PPP2R5D,PUM1,PXN,RBM14,RMDN3,SLC2A4,SLC43A2,SLC9A3,SNX3,SORT1,ST14,TNS1	1580 (12)
TCF		group		-1.437	3.47e-05	ABCB1,ADGRG2,ARL4A,BCL2L1,BMP4,CCND1,CCT8,CEACAM1,CNN2,CRAT,CRYBG1,CYP24A1,DDX17,ECM1,EGR1,EPCAM,EPHB3,FGF9,GAD1,HTRA1,ID3,IFITM1,IL1R1,IRS1,ITGA1,JUNB,LEF1,LGALS3,LGR5,LMO2,MME,MMP2,MSX2,NRCAM,PCSK6,PLS3,PTCH1,PTGS2,RCN1,SAA1,SEMA3C,SERPINA1,SLC1A5,SLC26A2,SOX9,TK1,TOB2,TSC22D1,UGCG	2200 (16)
RAC1	-0.691	enzyme		-1.35	3.48e-05	ABCB1,ACP5,AKT1,ANKRD1,APBB1,BCL2L1,BID,CCN2,CCND1,CDC25A,CDH1,CDH2,COL2A1,CTNNB1,CXCL8,CYLD,DUSP1,FAS,FGF2,FN1,FOSL1,FOXO1,GSN,GSPT1,HIF1A,HMOX1,HSPB1,ICAM1,IL1B,IL23A,IL6,ITGA6,ITGB1,JUN,KRT6B,MAPK8,MCL1,MMP14,MMP2,NF2,PAK1,PLAUR,PRKG1,PTGS2,RAC1,RAC3,RHOA,SHC1,SLC5A5,SNAI2,SOD2,SOX5,SOX6,SOX9,STAT1,STAT3,TGFB1,VEGFA,WNT3A,WNT5A	1721 (14)
mir-183		microRNA	Activated	2.252	3.5e-05	BMI1,BRMS1L,CDH1,EGR1,FN1,FOXF2,IRS1,ITGB1,JUP,LRP1,PTEN,SEL1L,SERPINE2,SLC30A1,SLC30A7,SLC39A9,TAOK1,VIM,ZEB1
CXCL12	8.789	cytokine		-1.542	3.61e-05	ACP5,ADAM17,AKR1C3,ANKRD12,AXL,BAD,BCL2L1,BCL3,BMP1,BMP2,BMP6,CANX,CCND1,CD14,CD47,CD82,CD9,CDH1,CDK2,COL1A1,CTNNB1,CXCL12,CXCL8,CXCR4,DLX5,DOCK9,EGFR,EGR1,ERBB2,ERCC1,FAS,FLNA,FN1,FYN,GAD1,GSK3B,GSR,HIPK3,HLA-B,HNRNPD,ICAM1,ID1,IFI27,IGFBP7,IL1A,IL1B,IL24,IL6,IRF3,IRF6,ITGB1,JMJD1C,JUN,JUNB,KIT,LOXL2,MAFK,MAPK12,MAPK8IP2,MAPRE3,MARCKS,MMP11,MMP14,MMP2,MSH6,MSX2,NCK1,NR4A1,NUMA1,PCDH1,PDX1,PKD1,P…	2095 (16)
QKI	0.919	other		-0.638	3.69e-05	AXIN1,BRSK2,CDH1,CLTC,CSF1R,CTNNB1,DACT1,EGFR,GPM6A,GPM6B,HNRNPH1,ID1,ITGB8,LAMP1,LAMP2,LAMP3,MACROH2A1,MAP1B,NOTCH1,PEA15,SNX2,SNX3,SOX2,TNC,VIM	1462 (13)
anisomycin		chemical - endogenous non-mammalian		-0.089	3.75e-05	ABCB1,AHR,BCL2L1,CFLAR,CXCL8,DUSP1,DUSP8,EGR1,HDAC1,HIF1A,HSPA5,IL1RL1,IL6,IRF1,IRS1,JUN,JUNB,LDLR,MAPK8,MCL1,NR4A1,NTRK2,PLAU,PLAUR,PPM1D,PPP2CA,RGS7,SDC1,SKIL,SLC17A7,SPP1,TERT,VEGFA	1749 (15)
ramipril		chemical drug	Activated	2.737	3.86e-05	CCN2,COL1A1,COL3A1,COL4A1,COL4A2,COL4A5,DDR1,FN1,IL6,ITGA2,LAMA1,LAMB1,LAMC1,MAPK14,MMP2,NOS2,PTGS2,TGFB1,TIMP1,TIMP2,VEGFA
miR-338-3p (miRNAs w/seed CCAGCAU)		mature microRNA	Activated	2.294	3.89e-05	ADAMTS14,ADAMTS15,ADAMTS2,COL1A1,COL4A1,COL4A2,COL4A5,COL5A1,COL8A1,LAMC1,LOXL2,NID1,NID2,P3H1,PDGFA,PDGFB,PLEC,PLOD2,SPARC,TAGLN,TGFBR2,VCAN,VIM
IHH	2.219	enzyme		0.246	3.91e-05	ALPL,BMP4,CCND1,CTNNB1,DKK1,EN1,FLT1,GLI1,HHIP,HSD17B7,MEF2C,MET,NR2F2,PTCH1,PTHLH,RUNX2,SMO,SPP1,SRD5A3,TAC1,TAL1,VEGFA
F2RL1	-2.565	G-protein coupled receptor	Inhibited	-3.205	4.1e-05	AREG,BDNF,CASP7,CAV1,CCN1,CCN2,CSF2,CTSD,CXCL1,CXCL2,CXCL8,DUSP6,F2RL1,F3,FAS,FGF5,GBP2,GBP4,GBP6,HBEGF,IL1A,IL1B,IL6,IRF8,LIF,MSC,NOS2,PSEN1,PTGS2,RARG,SERPINB2,TGFA,TSPAN15,TXNIP,VEGFA,VEGFC,WWOX	1734 (13)
WNT1		cytokine		-0.208	4.1e-05	APCDD1,AXIN2,BIRC5,BMP4,CCDC80,CCN5,CCNB1,CCND1,CCND3,CCNG1,CD24,CDH1,CDKN1B,COL3A1,CSNK2A2,CTNNB1,DHFR,DKK1,DLL4,EDN1,EFNB1,EGR1,EIF3C,EIF4EBP1,ENPP2,ETS2,ETV4,FN1,FZD2,GAS1,GRN,IGF1R,JUN,JUNB,KIT,KLF5,KRT6B,LBH,LEF1,MRAS,NCK1,NEUROG2,NKX2-2,NXF1,OTX2,PDCD4,PITX2,PPARG,PTGS2,RARB,RARG,RHOU,RPS6,RUNX2,SEMA3C,SERPINE2,SIM1,SPP1,STAT5A,TJP1,TLE1,TLX3,TP53,TWIST1,VEGFC,XIAP	2413 (18)
IGFBP2	3.904	other		-1.742	4.12e-05	AKT1,ARRB2,BCL2L1,CADM1,CASP3,CCND1,CD24,CDH1,CHD9,COL14A1,DDAH1,EFEMP1,EGFR,ENPP5,EPHA4,FN1,GDF15,GHR,IGFBP2,IGFBP3,IGFBP4,ITGA5,ITGA6,LGR5,MMP2,NF1,NUP210,PTEN,PTGFRN,RBMS3,STAT3,THBS2	2371 (17)
MAPK9	0.15	kinase	Inhibited	-2.783	4.16e-05	ACLY,BAK1,BBC3,BIRC3,BMP1,BMP4,CACNB3,CAV1,CCN2,CDKN1B,CDT1,CEBPB,CHERP,CXCL8,DMD,EDN1,EGR1,EOMES,EPAS1,FAS,FOSL1,FOSL2,GADD45A,GADD45B,GAPDH,GPAT4,HIF1A,HMGA1,IER2,IFI16,IGFBP2,IL11,IL12A,IL12RB2,IL15RA,IL18,IL1B,IL6,IRF9,ISG20,JUN,JUNB,KLF6,LGALS3BP,LIF,LMNA,LMO7,LPL,LSM3,LUC7L3,MARCKSL1,METAP2,MIF,NMI,NOS2,NR1H3,NR3C2,PDIA3,PLA2G4A,PLIN2,PPARA,PPARG,PTCH1,PTEN,PTGES,RAC1,RAD23B,RBL1,RPSA,SERPI…	1513 (14)
CHD1	0.237	enzyme	Inhibited	-3.207	4.21e-05	BCL2A1,BMP2,CSF2,CXCL1,CXCL2,CXCL3,ICAM1,IER3,IL1A,IL1B,IL6,LIF,PTGS2,SOD2
halofuginone		chemical drug	Activated	2.084	4.26e-05	AACS,ACP5,ANXA4,BGN,BHLHE40,CCN2,CKB,CLIP2,COL1A1,CTHRC1,CYGB,DBN1,DKK3,EGR1,EHD3,EMP1,FBLN5,FBN1,FGFR3,FXYD6,GATM,GDE1,GPX3,GYG1,HDGFL2,HK1,HSD17B1,HSPA4,IFITM2,IGFBP3,ITGA7,KLRG1,LGALS1,LGALS3BP,LIN7A,LOX,LRAT,LTBP1,MLXIPL,MMP2,NAB2,NFE2L2,NLGN1,PCOLCE,PCSK6,PKM,PLPP3,PMP22,PTGFRN,PTK2B,RGCC,SCPEP1,SELENOW,SLC13A3,SMAD7,SPARC,SPP1,ST3GAL2,STEAP3,TAGLN,TAGLN3,TCF4,TGFB1,TGFBR2,TGM2,TIMP1,TIMP2,W…	2099 (17)
genistein		chemical drug		-0.854	4.29e-05	ACP3,ACP5,ADK,ADM,AGA,AKR1C3,ALDH5A1,ALPP,ANGPTL4,AP1S2,ARSA,ASAH1,ATF4,ATP6V0A1,ATP6V1C1,ATP6V1H,BAD,BCL2L1,BCL3,BDKRB1,BDNF,BIRC5,BMP2,BMP2K,BTG3,C3,CASP3,CAT,CCN2,CCNB1,CCNB2,CCND1,CD164,CD8A,CDK1,CFD,CFLAR,CHEK2,CHST14,CLCN7,CLTCL1,COL1A1,CTSA,CTSB,CTSD,CTSF,CTSH,CTSV,CXCL12,CXCL2,CXCL3,CXCL8,DKK1,DNPH1,DUSP1,EPHA8,ERBB2,EXT1,F3,FBXW7,FCMR,FXYD5,GALC,GBA,GDF15,GDNF,GFPT1,GGA1,GGA2,GLI1,GM2A,G…	2595 (19)
N-Ac-Leu-Leu-norleucinal		chemical - protease inhibitor		-1.136	4.35e-05	ABCA1,ABCA7,APP,ATF4,BCAR1,BCL2L1,CAMK4,CASP3,CAV1,CCNB1,CCND1,CDC25A,CDKN1B,CREB1,CTNNB1,CXCL8,HLA-A,HLA-B,HLA-C,ICAM1,IER3,ITPR3,KCNH2,LAMP1,LAMP2,NFKBIA,NOS2,PAK2,PAWR,PRKCA,PTGS2,PTTG1,RARG,RB1,RBL1,RUNX2,SCARB1,SREBF2,STMN1,SYK,TGFBR2,TP53,TP73,XIAP	2054 (19)
torin1		chemical reagent		-1.524	4.36e-05	ACACB,ALDH1A3,ALDH9A1,ATP5F1B,ATP5F1E,ATP5MC1,ATP5PB,ATP5PF,ATP6V0A2,ATP6V0E1,ATP6V0E2,ATP6V1C1,ATP6V1D,BPGM,CCND1,CCND3,CDH1,CDH2,CDKN1B,COX15,COX17,COX5A,COX6C,COX7B,CYC1,GAPDH,HK1,HK2,NDUFA1,NDUFA2,NDUFA3,NDUFA6,NDUFA8,NDUFAB1,NDUFB10,NDUFS2,NDUFS7,NDUFS8,NTS,PDHA1,PDHB,PFKFB2,PFKP,PKM,PPA1,PTGS2,RPL32,RPS20,RPS6,TCIRG1,UQCR10,UQCRH,VIM	2145 (17)
FOLR1	1.473	transporter			4.46e-05	ACTN4,ACVR1,ADA,AK3,AP1S2,ARHGDIB,ATR,B3GNT3,BASP1,BIRC3,CAT,CAV1,CD9,CELF2,CENPK,COQ7,CSTF1,DUSP6,ECI2,ENTPD7,EPCAM,FBXO3,GBA,GLRX,GPAM,HNRNPDL,HOXB9,LPAR1,MPP6,NKX2-1,OSBPL1A,PDCD4,PFN1,PIP4K2C,PIP5K1B,RIOK3,RPS24,S100A4,SHCBP1,SIX5,SLC3A2,ST3GAL4,ST3GAL6,TAC1,TAGLN2,TBCE,TNFRSF11A,TTC3,UCHL5,XCL1
NLRX1	-0.183	other	Activated	3.479	4.5e-05	BCL10,BIRC3,CARD10,CASP8,GRN,IKBKB,IKBKG,IL1A,IL1B,IL1R1,IL6,IRAK1,IRAK4,IRF1,MAP2K1,MAP3K14,MYD88,NFKB1,NFKB2,NFKBIA,NFKBIE,OAS1,PIK3R1,RAF1,RELB,SLC2A1,STAT1,STAT2,TLR1,TNFAIP3,TRADD	1504 (10)
RICTOR	-0.613	other	Inhibited	-3.388	4.58e-05	ATP5F1B,ATP5F1C,ATP5F1D,ATP5MC1,ATP5MC2,ATP5MC3,ATP5PB,ATP5PF,ATP6V0A1,ATP6V0A2,ATP6V0E2,ATP6V1C1,ATP6V1D,ATP6V1H,BAD,BBC3,BCL2L1,CDC42EP5,CFLAR,COX11,COX15,COX17,COX5A,COX6B2,COX7B,CYC1,DAXX,EGR1,FABP5,FAU,GCK,HIF1A,HK2,IFI16,IFIT2,IL7R,IRS2,ISG15,LEPR,MCL1,MRPL13,NCAM2,NDUFA1,NDUFA2,NDUFA3,NDUFA4,NDUFA5,NDUFA6,NDUFA8,NDUFAB1,NDUFB10,NDUFB4,NDUFB5,NDUFS2,NDUFS4,NDUFS7,NDUFS8,NDUFV1,NDUFV3,NIPAL1…	2275 (23)
IL1RN	-6.724	cytokine	Activated	6.388	4.67e-05	BDKRB1,BTN3A1,CHAC1,CTSS,CXCL1,CXCL11,CXCL3,CXCL8,CYLD,DDX58,ERAP2,GBP1,GSDMD,HDAC9,HERC6,ICAM1,IFI27,IFI44,IFI44L,IFI6,IFIH1,IFIT3,IFIT5,IGFBP4,IGFBP5,IL1A,IL1B,IL23A,IL32,IL6,IRF1,IRF7,IRF9,ISG20,KLF6,LAMP3,LGALS9,LIF,LIFR,MX1,MX2,NOS2,OAS1,OAS2,OAS3,OASL,PMAIP1,PML,PTGS2,RIPK2,RSAD2,RTP4,SAMD9,SLC15A3,SP100,SPP1,STAT2,TAC1,THEMIS2,TIMP1,TRIM22,VEGFA,VEGFC,YLPM1,ZNF81	1508 (15)
Insulin		group		-1.675	4.72e-05	ABCA1,ACADM,ACLY,ACOX1,ACSL1,ACTB,ADAM10,ADIPOR1,ADIPOR2,AGTR1,AKT1,ANGPTL4,APLN,APP,APPL1,ARG2,ARRB1,ATP5F1D,ATP5MC1,ATP5MC2,BCL2L1,BIRC5,BMPR2,CANX,CAV2,CCK,CCN2,CCNC,CCND1,CCND3,CCNE2,CCT4,CCT7,CCT8,CDK2,CDK8,CDKN1B,CDKN2B,CDX2,CEBPB,CFLAR,CHRM3,COL1A1,COL3A1,COL4A1,COL5A1,COL6A1,CRABP2,CTH,CTNNB1,CXCL1,CYCS,DGAT2,DUOX1,DUSP1,DUSP4,EDN1,EGFR,EGR1,ELOVL3,ENPP2,EPAS1,ERO1A,ERRFI1,ETFA,FBXO32,FER…	2110 (17)
SOX4	0.356	transcription regulator		0.178	4.73e-05	ADGRE5,AIF1L,AMOTL1,APBB1,ARNT,B3GNT5,B3GNT8,BBC3,BCAR3,BEX3,BIRC5,BMPR2,C19orf44,CACNA1H,CAPN2,CASP1,CDH2,CEMIP2,CGAS,CHAC1,CNRIP1,CSNK1E,CTNNA1,CTNNB1,DDAH2,DUSP4,EIF4E3,EMB,EMP1,ENPEP,EOMES,EPG5,EVL,FGF13,FHL1,FN1,GCAT,GFI1,GGA2,GLDC,GRB7,H1-10,HDAC8,IGFBP4,KANK1,KDM7A,KYNU,LCK,LMO7,LUZP1,MAGED1,MAGI1,MAP4K5,MAP7,MARCKSL1,MBP,MEX3A,MMP11,NCAM1,NREP,OVOS2,PARD6G,PLEKHA1,PPIC,PPM1F,PXYLP1,PYGL,S…	2057 (13)
MYB	-0.836	transcription regulator		0.218	4.78e-05	ADA,ADAM12,ADM,ATP2B1,AURKA,AXIN2,BANK1,BCL2L1,BHLHE40,BIRC3,BIRC5,C15orf48,C3,CAMK2B,CASP6,CBX4,CCNA1,CCNB1,CCND1,CCND3,CD14,CDH1,CDH2,CDK1,CDKN2B,CNN3,COL4A1,CXCL12,CXCL16,CXCL2,CXCR4,EGFR,ERBIN,FN1,FOXM1,FUT8,GFI1,HAND2,HSPA5,HSPA8,ICAM1,IGF1R,IGFBP3,IGFBP5,IKBKE,IL1A,IL6,IL7R,IQGAP1,ITPR1,JAK2,JUN,KIT,LANCL3,LIF,METTL7B,MFAP3L,MMP11,MTSS1,NEURL3,NFKB1,NFKB2,NOTCH1,PAX6,PDE2A,POLA1,PPP3CA,PRAG…	1691 (16)
STAT2	-2.151	transcription regulator	Inhibited	-2.899	5.07e-05	CAV1,CXCL8,GBP1,GBP6,GHDC,GLI1,IFI27,IFI35,IFI6,IFIT1,IFIT2,IFIT3,IFITM1,IFITM2,IL12A,IL6,IRF1,IRF5,IRF7,IRF9,ISG15,MX1,OAS1,OAS2,PITX2,PSMB8,RBX1,RSAD2,RTP4,SF3A1,SOCS3,ST13,STAT1,ZBED4,ZBP1	1790 (15)
LEF1	9.239	transcription regulator		-0.191	5.24e-05	ADAMTS6,ARHGAP20,ARHGEF12,ATP6V0A1,AXIN2,BIRC5,BMPR2,C3orf70,CACNA1G,CASP3,CASP7,CAV1,CCND1,CDH1,CDK1,CHCHD10,CHEK1,CTTN,CXCR4,DKK1,ECM1,FAS,FN1,FRMD6,GNAO1,GSAP,HAS2,IGF1R,IL7R,INPP5F,ITGB8,KIF13A,LCK,LEF1,LHX6,LONRF1,LRIG1,LYSMD2,MAPK12,MBNL3,MITF,MMP2,MSX2,MXD1,NCAM1,NCOA7,NKX2-1,NRCAM,NRN1,NTN4,PHLDA1,POU3F2,PPM1L,PRDM1,PTCH1,PTGS2,RNF8,RRAGD,RUNX2,SGK1,SH3GL3,SH3RF1,SLC35D1,SOX9,SPECC1,SPP1,…	2544 (25)
AKT1	-0.639	kinase	Inhibited	-2.071	5.3e-05	ABCB1,ACLY,AIP,AKT1,ANKRD1,ATP5MC1,ATP5MC3,BAD,BCL2A1,BCL2L1,BIRC3,BIRC5,BMP2,CASP3,CCND1,CCND3,CDH1,CDK2,CDKN1B,CEBPD,CFLAR,COL4A1,COL8A1,CRYZ,CST3,CTNNB1,CTSV,CXCL2,CXCL8,CXCR4,DHCR7,DIAPH1,DIAPH3,DLX3,E2F1,EGR1,EP300,EZR,FABP5,FAS,FBXO32,FGF2,FN1,FOXO1,FXYD5,GATM,GCK,GCLM,GDF15,GOSR2,GSR,GSS,HIF1A,HIPK3,HMOX1,HNRNPL,HNRNPM,HOXC11,HOXC12,HUNK,IGF1R,IGFBP5,IL11,IL6,IRS1,IRS2,ITGB1,KLF15,LAMA1,LA…	2370 (19)
Creb		group	Inhibited	-2.858	5.46e-05	AASS,ABL2,ACVR2B,ADK,ADM,AKT1,ANK3,ANKRA2,ANTXR2,AREG,ARPC5,ATP2A2,BAK1,BBC3,BDNF,BMP6,CACNA1C,CASP1,CCK,CCN1,CCND1,CD14,CD59,CDH10,CEBPB,CEBPD,CFLAR,CGB3 (includes others),CLMN,COL8A1,CPT1A,CSF1R,CSRP1,CTH,CTSB,CTSV,CXCL8,DDX6,DUSP1,DUSP4,DYNC1LI2,E4F1,EGR1,EPHA3,EPHB4,ETV5,FAS,FHDC1,FLNB,FOSL1,FXN,GABBR1,GDA,GNB4,GPR50,GPR85,GRK3,HAS2,HSPB8,HTT,IER3,IFI16,IL11,IL1B,IL6,INTS1,INTS7,IRS2,JUN,JUNB…	2145 (20)
trichloroethylene		chemical toxicant		-0.735	5.63e-05	ARHGAP18,ATF5,BCL2L1,CASP3,CCNG1,CD47,CD63,CDK6,CHP1,COL1A1,COL3A1,CSNK2A1,ECE1,EGR1,FBXO3,GSTO1,IGFBP3,IL13RA1,MAPKAPK2,NCKAP1,NFKB1,PLS3,PTEN,PTPRF,RHOB,RTN4,SLC16A1,SLC9A3R1,SOS2,SPARC,STOM,TNFRSF1A,TXNIP,YWHAQ
mir-27	0.34	microRNA		-0.846	5.63e-05	ABCA1,ABCB1,BIRC5,BMP2,CDH5,CXCL12,DLL4,E2F1,EDN1,EGFR,FBXW7,FLT1,HOXA10,HOXA11,HOXA5,IL1B,IL6,KRAS,MET,NF1,PDS5B,PKMYT1,PPARA,PPARG,PSAP,PTGS2,RUNX1,SEMA6A,SMAD9,SOCS6,SP3,SPRY2,TRIM27,ZBTB10	2359 (21)
RHOA	0.761	enzyme	Inhibited	-2.102	5.74e-05	ANLN,BCL2L1,CCN2,CCNB1,CCND1,CDH1,CDKN1B,CDKN2B,CEBPB,COL1A1,COL3A1,CTNNB1,CTSD,CXCL8,DIAPH1,ECT2,ERBB2,FN1,GDF15,HSPD1,ICAM1,IL1B,IL6,ITGB1,ITGB5,ITGBL1,JUN,MMP14,NFKB1,NKX2-1,NOS2,OCLN,PAK1,PLAU,PPARA,PRKG1,RHOA,RHOB,RHOC,RND3,RUNX2,SCARB1,SDC2,SNAI2,SOX9,STAT3,TAGLN,TGFB1	1737 (18)
FGF1	-5.676	growth factor		-1.253	6.06e-05	AHR,AKR1B1,AXIN2,CAVIN4,CCN1,CCN2,CCN5,CCND1,CDH1,COX5A,CTNNB1,CXCL1,DLX2,DUSP6,EDN1,EGR1,EN1,FGFR1,FHOD3,FZD2,FZD7,FZD8,GCLM,GDNF,GSTP1,HAS2,HMOX1,ICAM1,IKZF2,IL1B,IL6,IRS1,JUN,MAB21L1,MKI67,NDNF,NFE2L2,NOTCH1,NQO1,NR1H3,PDGFA,PMEPA1,PRICKLE1,PTGS2,PXYLP1,RFLNB,RHOU,SERPINB1,SGMS1,SLC7A2,SNAI2,SOX2,SPP1,SSTR2,TCF4,TGFB1,TGFB2,TGM2,TIMP3,TNFRSF12A,VEGFA,VEGFC,ZNF589	1693 (15)
miR-199a-5p (and other miRNAs w/seed CCAGUGU)		mature microRNA	Activated	5.149	6.25e-05	ALOX5AP,BCAM,BGN,BIRC5,C3,CALD1,CDH1,CELSR1,CMPK2,COL1A1,COL4A1,COL4A5,DDR1,ETS1,FN1,GPRC5A,HIF1A,ID3,IFI27,ISG15,ITGA1,ITGA3,JAG1,LIN7C,MPP5,MUC4,MX2,MYL9,NECTIN1,NFKB1,PTGS2,RSAD2,SAMD9L,SIRT1,TAGLN,TGFB1I1,TGFBR2,TGFBR3,VPS11,ZBP1,ZBTB16	1344 (7)
Mir200		group		-0.958	6.48e-05	BMI1,COL1A1,COL3A1,E2F3,JUN,LOX,LOXL2,LRP1,NEO1,RNF2,SEC23A,SERPINH1,SOX2,SUZ12,ZEB1,ZEB2
RABL6	0.011	other		-0.268	6.49e-05	BIK,CCNB1,CCNE2,CDC25A,CDK2,CENPF,CHEK1,CHEK2,CKS1B,DAPK1,DRAM1,ELF4,FERMT2,FRMD4A,H2AX,HBEGF,HMOX1,KIF23,MCM10,MCM5,MCM7,MELK,NCAPG,NDC80,PLK1,PMAIP1,POLA1,POLD1,PTPRM,RFC3,SEL1L,SERPINH1,TOP2A,TP53,TPX2,UBE2C,VRK1	1632 (7)
sulindac		chemical drug		-0.47	6.49e-05	ABCB1,APP,BIRC5,CCNB1,CCNB2,CCND1,CCNG1,CDC16,CDC25A,CDC6,CDK1,CDK2,CDK5,CDKN1B,CTNNB1,CYP1B1,E2F1,E2F2,E2F3,E2F5,EGFR,ERBB3,G0S2,IL1B,KRAS,NOS2,NQO1,PLA2G4A,PTGS1,PTGS2,RB1,RBBP4,RBL1,SERPINB1,TP53,VEGFA,WEE1	1929 (16)
DCN	4.092	other	Activated	2.451	6.91e-05	BGN,CASP3,CASP8,CCN2,CDH1,CDKN1B,DUSP1,ENG,ERBB2,FBN1,FGF2,FST,HIF1A,ICAM1,IGF1R,IL1B,IL6,IRS1,ITGAV,ITGB1,KIT,MET,MMP2,NOS2,SDC1,SEMA3A,SMAD3,TCHP,TGFB1,TIMP3,TP53,VEGFA	2182 (15)
GNAQ	-0.257	enzyme	Inhibited	-2.789	6.91e-05	ABCB1,ADM,AGTR1,ANKRD1,ANXA3,AREG,ATP2A2,BMP2,BMP4,CCN2,CCND1,CDC6,CTSV,CXCL12,CXCL3,CXCL8,DUSP5,EDN1,EGR1,F2RL1,FST,GADD45A,GALE,GAS6,GBP2,GNA11,GRB14,HAS2,HIGD1A,HK2,HSPB8,IL6,INSIG1,MAP3K8,MGST1,MMP16,NFIB,NOX5,NR4A1,NR4A3,OAS1,OLR1,PDE10A,PDK1,PHLDA1,PLAUR,PLCB1,PLSCR1,PRKCD,PTGS2,PYGL,RHOB,SELENBP1,SGK1,SH3BP5,SLC8A1,SPHK1,STAT1,TGFB2,VEGFA,YAP1,ZFP36L1	1578 (14)
miR-182-5p (and other miRNAs w/seed UUGGCAA)		mature microRNA		0.584	7.06e-05	ADCY6,CARD11,CASP10,CDH1,CDH4,CDK6,CLDN15,COL11A2,COL4A4,CTTN,FN1,FNDC3A,FOXO1,IGF1R,ITGA4,ITGB1,MITF,MTSS1,NCAM1,NLGN2,PIK3CA,RAC1,RARG,RPS6KB1,SERPINE2
CREBBP	0.908	transcription regulator		-1.688	7.29e-05	ADAM12,AHI1,ANXA6,AP3M2,ARHGAP24,ARHGEF10L,ASL,B2M,BANK1,BDKRB2,BIRC5,BMP7,CAMK2B,CAMK2G,CAMK4,CAPG,CARD6,CBL,CCN1,CCND1,CCND3,CD59,CDC42EP3,CDC6,CDH1,CDH5,CDKN1B,CKB,CLASP2,CLOCK,CNN3,COL2A1,CORO2B,CRIM1,CSF1,CXCL12,CXCL8,CXCR4,CYP24A1,DHFR,DHRS3,DUSP1,DUSP22,DUSP4,EGR1,EOMES,EPN1,EPSTI1,ERCC1,EVL,EYA2,FDPS,FGF2,FGFR3,FNDC3B,FOSL2,FRMD4A,GFI1,GFRA1,GLCCI1,GLI1,GM2A,GNG2,GRAMD2B,GRIN2C,GRIN2D,GRN…	1916 (14)
PAK2	-1.261	kinase		1.633	7.45e-05	BMP4,CKB,DUSP1,ETS1,GADD45A,H3C8,HBEGF,HMGA1,ID1,ID3,IFI16,IGFBP3,IGFBP5,LDLRAP1,PLAUR,PRKCI,PROX1,SMAD7,SMAD9,SMARCA2,TAGLN,WRN,ZEB1,ZEB2	2019 (14)
EGR1	-3.684	transcription regulator	Inhibited	-3.296	7.65e-05	ABCB1,ALOX5AP,APP,ARC,AREG,ATP2A2,BAIAP2,BCAR1,CACNA1H,CASP3,CASP6,CASP7,CASP8,CAV1,CAVIN1,CCND1,CDH1,CDKN2D,CHRNA7,COL1A1,COL2A1,CSF1,CXCL2,CXCL3,CXCL8,DUSP4,EGFR,EGR1,EIF4EBP1,ENPEP,F3,FAS,FGF2,FLT1,FN1,FOSL1,FTL,FYN,GAD1,GADD45A,GADD45B,GALNT3,GDF15,GDNF,GLI1,HBEGF,HIF1A,HMOX1,HPSE,ICAM1,IGF1R,IL1B,JUN,JUNB,LDLR,ME1,MMP14,MXD1,MYBL1,NAB2,NFKB1,NR4A1,PDGFA,PDGFC,PDX1,PEG10,PLAU,PNPLA2,PPARG,PTE…	2463 (17)
UCN-01		chemical drug	Activated	2.708	7.82e-05	BAG1,BCL2L1,CCND1,CCND3,CDC25A,CDK2,CXCL8,ERCC1,IL1B,MCL1,PLK1,RAF1,RB1,RHOB,RRM2,TP53,TP73,XIAP	2127 (20)
TEAD1	-0.824	transcription regulator	Inhibited	-2.082	7.95e-05	ADM,AK5,BBOX1,CALD1,CCN1,CCN2,CCND1,CCND3,CDK6,CDKN1B,COL3A1,EDN1,FILIP1L,GSK3B,IGFBP5,KAZN,LATS2,LIMCH1,LOXL1,MSLN,MTMR10,NFKBIZ,PCDH18,PDGFRL,PTGS2,PURB,RB1,RHOBTB1,SAMD5,SDC2,SH3BP4,SH3D19,SLFN5,SULF1,TAGLN,TGFA,TLE1,TPM1,TRNP1	1975 (14)
clopidogrel		chemical drug		1.618	7.95e-05	AGRN,ALDH1L2,ATOH8,C1QTNF6,CHAC1,COL1A1,COL5A1,CTH,CXCL12,DHRS3,DUSP10,EGFR,F3,GARS1,GPT2,HOXA5,HRK,IFIT1,IFRD1,INAVA,KLF15,LAMA5,LURAP1L,LYPD3,MTLN,NR2F1,PMAIP1,PSAT1,RASL11A,SESN2,SLC1A4,SLC3A2,SNHG15,STC2,TRIB3,VEGFA,WNT7B,XBP1,ZMYND8	746 (7)
UCP1	1.318	transporter	Activated	2.215	7.96e-05	AARS1,ACOT2,ALDH18A1,ANKRD1,ATF4,ATF5,BTF3,CASP3,CCDC136,CHCHD10,CLCN3,CPNE2,CTH,CTSV,CYB5R1,DBT,DDX58,DKK3,EIF4EBP1,EMB,EML1,ENHO,ESRRG,FBXO32,FUT1,G6PD,GADD45A,GARS1,GDF15,GOLM1,GPX3,GREM2,GSR,GSTO1,GSTZ1,HSD17B7,IFIT2,IFIT3,IL1B,IL6,IRF3,ITPR1,KLHL8,LRRC8D,MAP1LC3A,MTHFD1L,OAS3,PGD,PHGDH,PHYHD1,PSAT1,PYCR1,RAB40B,REEP6,RNASEL,SLC3A2,SMOX,SMS,SMTNL2,SMYD2,SND1,STAP2,STYX,SYNM,TBC1D31,TENM4,TGFB…
IGF2BP1	2.329	translation regulator		0.527	8.05e-05	ACTB,ASCL2,AXIN2,BCL11A,BIRC2,CDC34,COL14A1,COL1A1,COL5A1,COL6A2,CYFIP2,GADD45A,GLI1,KRAS,LGALS1,LIN28B,LUM,PTEN,SERPINH1,SOX9,TNC,WNT3
mitomycin C		chemical drug		-1.249	8.13e-05	BCL2L1,BIRC5,BRCA2,BRD2,CASP3,CCNB2,CCND1,CDC25A,CXCL8,DESI2,EGR1,FAS,GADD45A,HBEGF,IRF2BP2,IRF2BPL,ITPRIPL2,JUN,MCAM,NQO1,PMAIP1,POU5F1,PPM1D,PYCARD,SESN2,SRSF5,SRSF7,TBC1D24,TP53,TP53INP1,TYMP,VEGFA,VMP1,WEE1,ZMAT3	1974 (18)
IL5	1.318	cytokine	Inhibited	-3.584	8.38e-05	ACP5,AK3,ANXA2,ANXA6,AREG,ATF4,ATP1B1,BCL2L1,BCL3,BIRC2,CASP4,CCND3,CD24,CD63,CD9,CDC123,CEACAM1,CHMP1A,CKAP4,CLEC2B,CRELD2,CSF2,CTSC,CXCL8,CXCR4,DENND11,DUSP5,DUSP6,EGLN1,EGLN3,EGR1,EIF4EBP1,ELL2,EPS8,ERO1A,FAS,FOSL2,GADD45A,GALK1,GBP2,GBP4,GCAT,GCLM,GK,GLIPR2,GPAM,GSTT2/GSTT2B,HBEGF,HCAR3,HIF1A,HIGD1A,HLX,HSP90B1,HSPA5,HSPH1,ICAM1,IDI1,IER2,IER3,IL13RA1,IL1RL1,IL4R,IRF7,ITGAV,KLHDC2,LFNG,LIMK2,…	2308 (17)
STAT5A	-6.561	transcription regulator		-1.982	8.38e-05	ABCA1,ABCB1,AKR1C3,ANKRD22,ARNT,ASCL2,AXIN2,BCL11A,BCL2A1,BCL2L1,BIRC3,C15orf48,CASP3,CASP4,CASP6,CASP8,CCND1,CCND3,CD24,CDC7,CDH1,CDK6,CDKN1B,CEACAM1,CEBPB,CEMIP,CFLAR,CHEK1,CPA4,CYP1B1,CYP27B1,DUSP5,EGLN3,EOMES,EPAS1,ERAP2,FAS,FGFBP1,FKBP14,FOSL2,FOXA1,FOXQ1,GADD45A,GALC,GASK1B,GCNT3,GRHL3,HENMT1,HOXA13,HOXB6,ICAM1,ICAM2,ID1,IFITM2,IGFL2-AS1,IL12RB2,IL24,IL6,IL6ST,IL7R,IRF1,KIT,KLF10,KLRG1,KRT8…	2037 (14)
PNPT1	-0.01	enzyme	Activated	3.397	8.4e-05	AGRN,BCL2L1,CDKN1B,CMPK2,CXCL8,DDX58,DTX3,EIF2AK2,GBP2,GBP4,GBP6,IFI16,IFI44,IFIH1,IFIT3,IL6,IRF7,ISG15,LGALS3BP,OAS1,PARP12,PARP9,RNF213,RTP4,SAMD9L,STAT1,STAT2,TNFRSF1A,UBE2L6,XAF1	1904 (16)
FBXO32	-1.269	enzyme		1.147	8.4e-05	ABCC4,ALDH1A3,ALG12,ASF1A,AXIN2,CADM1,CALR,CDKN1B,CKMT1A/CKMT1B,CSF2,CXCL2,CXCL3,DNAJB9,DNAJC3,ERP44,FGF9,GADD45A,HSPA5,HYOU1,IL1B,IL1R1,IL6,ISYNA1,ITGA3,KLF5,LEF1,MAPT,MSX2,NANS,PDIA2,PDIA3,PLPPR4,PPP3CA,PSEN2,PTGES,PTGS2,PYCR1,RAB27A,RPN1,SERP1,SERPINB2,SOD2,STT3A,TFPI2,XBP1
SRC	-2.785	kinase	Inhibited	-3.48	8.57e-05	BCL2L1,CAV1,CAVIN1,CBL,CCND1,CDH1,CDK1,CDON,CSF2,CTNNB1,CTNND1,CTSB,CTSV,CXCL8,DOK1,DUSP1,EGFR,ERBB2,F3,FMN2,FN1,FOSL1,GBP1,HAS2,HIF1A,ICAM1,ID1,IGF1R,IL6,JUN,KRT18,LAMP1,LAMP2,LDLR,MCL1,MMP2,NFKB1,PLAU,PLAUR,PLK1,POU5F1,PRKCA,PRKCD,PTGS2,SIRPA,SLC2A1,SPP1,SRC,STAT3,SYNPO,TFPI2,TJP1,TNFRSF11A,TWIST1,VEGFA,VEGFC,VIM,ZEB1	2339 (18)
F2R	0.293	G-protein coupled receptor	Inhibited	-3.149	8.65e-05	AKT3,BIRC2,CASP3,CASP4,CCN1,CCN2,CCND1,CD24,CDH1,COL13A1,CXCL12,CXCL3,CXCL8,DSP,DUSP1,ECE1,EGR1,F3,FLT1,FN1,GNA12,GNA13,HMOX1,ICAM1,IGFBP7,IL1B,IL6,ITGA6,KRT8,LAMB1,MCAM,MIF,MMP2,NR4A1,PLAU,PLAUR,PTAFR,PTGS2,RHOA,S100A4,TAGLN,TFPI,TFPI2,TGFB1I1,TGFB2,TGM2,TJP1,TNFAIP3,TP53,TRPC3,VEGFA,VEGFC,VIM	1985 (14)
miR-21-5p (and other miRNAs w/seed AGCUUAU)		mature microRNA	Activated	2.754	8.95e-05	BCL2L1,BMPR2,CDC25A,CDH5,CDK6,FAM3C,FAS,GLCCI1,GSK3B,HIPK3,IL1B,IL32,IL6,IRAK1,JAG1,LRRFIP1,MARCKS,MMP2,MSH2,MYD88,NFIB,NFKB1,PDCD4,PIK3R1,PRRG4,PTEN,RECK,SLC16A10,SMAD7,SMARCA4,SOX5,SPRY2,STAT3,TAGLN,TGFB2,TGFBR2,TIMP3,TPM1	2079 (18)
3,3'-diindolylmethane		chemical drug		-1.494	8.95e-05	BAD,BAK1,BBC3,BCL2L1,BIRC5,CASP8,CCND1,CDC25A,CDK6,CDKN1B,EGFR,ERBB2,FAS,FOXM1,GDF15,HLA-A,HLA-B,HLA-C,HMOX1,IFIT1,IFNGR1,IL1B,IL6,IRAK1,NFKBIA,NOS2,NQO1,OAS2,PTEN,PTGS2,SNAI2,TAP1,TAP2,TGFA,TMEM121B,TNFRSF10A,VIM,ZEB1	2178 (15)
etoposide		chemical drug		-1.623	9.08e-05	ABCB1,ADAM10,ADAM17,AKT1,BBC3,BCL2A1,BCL2L1,BCL2L10,BDNF,BIN1,BIRC2,BIRC3,BIRC5,BLM,CASP3,CCNA1,CCNB1,CCND1,CD274,CDC25A,CDC25B,CDK1,CDKN1B,CFLAR,CSF2,CTSD,CXCL3,CXCL8,CYCS,DFFB,DHX9,DUSP1,DUSP4,E2F1,E2F3,FANCD2,FAS,FBXW7,FOXF1,FTH1,GADD45A,GDF15,H2AX,HK1,HK2,ICAM1,ID1,IER3,IFIT2,IL11,IL1A,IL1B,IL6,ING2,IRF1,IRF7,JAK2,JUN,KCNK1,LIMA1,LPAR6,MCL1,MDC1,MME,NFKB2,NR4A1,PEBP1,PIDD1,POU5F1,RELB,RHOBTB2…	2017 (14)
1810019D21Rik		other	Activated	3.087	9.09e-05	ABCB1,AK5,APOL6,AREG,BDKRB2,CCNG1,COL6A1,COL6A2,COL8A1,EDN1,EFNA3,ENTPD3,ESRP2,FST,ITGA2,KCNH2,KCNN1,NIPAL1,PALMD,PLA2G7,PLAU,RAPGEF3,SLC4A11,SLC7A11,SNAI2,SQOR,STYK1,SYNE1,TCEAL1,THBD,TMEM44,UGT1A6,ZEB1,ZNF365
garcinol		chemical - endogenous non-mammalian		0.772	9.41e-05	ARHGAP35,BCL2L1,BCL2L2,BFAR,BLZF1,BRPF1,CASP4,CCNA1,CDC34,CDK5,DAPK1,DVL2,ELF4,GSPT1,GTF3A,HIRA,HMGN1,HMGXB4,HOXD10,KRAS,MAF,MAP3K20,MEF2C,MSX1,NEK3,NFE2L1,NFKB1,NR4A3,OCIAD1,PAK6,PERP,PHTF1,PIM2,PITX2,PML,POLR2J2/POLR2J3,RAB22A,RELB,SATB1,TADA2A,TCF7L1,TPT1,TRIM24,TXNDC9,ZFP3,ZFP36,ZNF195	1213 (9)
MACROH2A1	-0.52	other		1.649	9.54e-05	ABCA1,ACADL,AKT1,ALDH1A3,ANXA2,ATP5F1C,BMI1,BRCA2,CDKN2B,CTHRC1,EDN1,EGR1,ERBB2,ETS1,FANK1,FITM2,FN1,FSTL3,GADD45A,GCK,HERC5,ID1,IL6,IRF7,IRS1,KRT23,LIN28B,LPL,NBN,PARP1,PLAU,POU5F1,PPA1,PPARG,SERPINB2,SLC2A1,SLC2A4,SLC7A2,SOCS2,SOX2,SPARC,TBX3,TERT,TWIST1	1932 (20)
GNA15	-8.17	enzyme			9.77e-05	ADARB1,ADM,BMP3,BMP4,C3,CASP4,CAV2,CDS1,CEBPD,CTH,CXCL2,CXCL3,CXCL8,CYCS,ELOVL2,ENPP1,FBLN5,FHL1,FHL2,FOSL1,FXYD5,GADD45A,GBP2,GDA,GUCY1B1,HLA-E,HMOX1,HSD3B7,IL6,LGALS3,MAFK,MCFD2,MGST1,MICOS10-NBL1/NBL1,NFKB1,OLR1,PAWR,PDLIM1,PFN2,PRKAA2,PTGS2,RAPGEF4,SELENBP1,SLC7A1,SOD2,SORBS2,SYNE1,TAGLN,THBD,TIMP1,TRIB3,UGDH,UNC5B,VCAN,XCL1,XDH,ZFP36L1	1871 (16)
methylmercury		chemical toxicant		-0.761	0.000101	ARHGAP18,ATF5,BAD,BCL2L1,CASP3,CCNG1,CD47,CD63,CDK6,CHP1,COL1A1,COL3A1,CSNK2A1,ECE1,EGR1,FBXO3,HMOX1,IGFBP3,IL13RA1,IL6,MAPKAPK2,NCKAP1,NFKB1,PLS3,PTEN,PTPRF,RHOB,RTN4,SLC16A1,SLC1A1,SLC9A3R1,SOS2,SPARC,STOM,TNFRSF1A,TXNIP,YWHAQ	1697 (15)
SMAD1	-0.29	transcription regulator		-0.855	0.000101	ALPL,BCL2L1,CCN2,CDKN2B,COCH,COL1A1,COL2A1,COL4A1,CSF1,CXCL2,GADD45B,GRN,HEY1,HHEX,ICAM1,ID1,ID4,IL11,IRF1,NKX2-5,PDGFA,PDGFB,RUNX2,SMAD7,SOX9,SPP1,TBX20,VEGFA	2150 (20)
SP600125		chemical - kinase inhibitor	Activated	3.391	0.000103	ABCA1,ABCB1,ADAMTS9,ADM,AKR1C3,APOBEC3B,BAD,BAK1,BBOX1,BCL2L1,BCL2L2,BDH1,CASP3,CBY1,CCDC117,CCN1,CCN2,CCNB1,CCND1,CD2AP,CDK1,CDKN1B,CEBPB,CHAC1,CKAP4,CLDN4,COL1A1,COL4A1,COL4A2,COL7A1,COL8A1,CPM,CRYM,CSF1R,CXCL1,CXCL16,CXCL2,CXCL8,CYGB,CYP27B1,DDIT4L,DKK1,DSG2,DUSP1,EGR1,EMB,F3,FABP5,FAS,FN1,FOXO1,FOXQ1,GADD45A,GATA4,GBP2,GNS,GRB10,H2AX,H2BC15,HMOX1,ICAM1,IL15,IL1A,IL1B,IL23A,IL6,IRS1,ISG15,ITGA…	2007 (16)
KMT2A	-0.027	transcription regulator	Activated	2.348	0.000104	BAG3,BAHCC1,CDKN1B,CLCN3,DEPTOR,DUSP10,EGR1,EML5,EPHB3,EPHB4,ETS1,EYA1,FOXC1,FOXC2,GCNT4,HOTAIR,HOXA10,HOXA11,HOXA13,HOXA5,HOXA7,HOXA9,HOXB3,HOXB5,HOXB6,HOXB7,HOXB8,HOXC6,HOXC8,HOXC9,HOXD3,HOXD4,IGFBP4,KLF6,MECOM,MEIS2,MGLL,MKX,MSX2,PITX2,PRDM16,RGS4,SATB2,SCARB1,SP9,TET1,TRIB1,ZBTB18,ZMYND11	1926 (13)
PRDM5	0.05	transcription regulator		-0.378	0.000107	ALX4,APOBEC3B,ARID3B,CACNA1C,CD99,CDC42EP4,CDH4,CEMIP,CLDN16,COL19A1,CYB5D1,DKK3,E2F3,EBF1,EMID1,ETS2,EVL,GABPA,GADD45B,GCK,INSYN1,INTS3,MYD88,MYOM2,NAV2,NCOA7,NLRC5,NOTCH1,NOTCH2,NREP,OVOL1,PALM2AKAP2,PAX6,PIAS3,PML,POU5F1,PPIL2,RUNX1,RUNX2,SIK1/SIK1B,SNRNP48,SOCS3,SOX2,TP53,UBL7,WNT10B
IFNB1	-3.255	cytokine	Inhibited	-4.126	0.000108	ADAM17,AMH,APOL2,APOL6,AXL,BAK1,BCL2L1,BHLHE40,BST2,BTN3A3,CAPN2,CARD6,CASP1,CASP3,CASP8,CD14,CD274,CDH2,CDKL2,CLSTN1,CMPK2,COL12A1,CSF2,CXCL11,CXCL2,CXCL3,CXCL8,DAXX,DDX58,DHX58,DKK3,E2F1,EIF2AK2,FBLN2,FBN1,FGF2,FKBP9,GAS1,GBP2,GBP3,GBP4,GBP6,GLP2R,GNB4,GPC4,HERC5,HLA-A,ICOSLG/LOC102723996,IDI1,IFI16,IFI27,IFI6,IFIH1,IFIT1,IFIT2,IFIT3,IFITM1,IFNGR1,IL12A,IL18,IL1B,IL1R1,IL24,IL6,IP6K2,IRAK4,IRF1…	1095 (14)
ADCYAP1	3.101	other		-1.088	0.000116	ACTN1,ADCYAP1R1,AKT1,ARHGDIG,ARHGEF25,ATRN,AZIN1,BCAM,BDNF,BMP6,CACNA2D3,CAMK4,CCBE1,CCNI,CEBPB,CEBPD,CFL1,CLCF1,CNN3,COL3A1,COL5A1,CREB1,CREBBP,CXCL2,CXCL3,DCDC2,DDHD1,EDIL3,EGR1,ELAVL1,EMB,ENPP2,EPHA2,FRRS1,FST,GALNT7,GAS1,GCLM,GLI1,GOSR1,GPC3,GREB1,GREM2,GRK5,HK1,ID3,IDH2,IER3,IL23A,IL6,IRF1,IRF3,KCNN4,KIF23,KRT8,LAMA1,LRPAP1,LUM,MAN1A1,MAPK4,MAPK8IP3,MCAM,MCM3AP,MEST,MME,MREG,NECAP2,NFKBIA,NO…	1782 (14)
emactuzumab		biologic drug	Inhibited	-3.162	0.00012	DHX58,GBP4,IFIT1,IFIT3,IFITM3,IRF9,ISG15,STAT1,STAT2,XAF1
ITGB3	-1.661	transmembrane receptor		-1.588	0.00012	ACLY,APLP2,BCL2L1,BIRC2,CD274,CDK1,CEACAM1,COL1A1,CSF1,FN1,HAS2,HSP90B1,IL1B,ITGA3,ITGA5,ITGAV,ITGB5,LAPTM4A,LDLR,LIMS1,MMP14,MMP2,NDUFV1,PLAU,PLAUR,PTGS2,RHOA,RUNX1,RUNX2,SDHC,SMAD3,SMAD7,SNAI2,SPARC,TGFB1,TGFBR2,TIMP1,VPS72,XIAP	1379 (19)
Ifn		group	Inhibited	-5.764	0.000121	B2M,BAG1,CASP8,CD58,CFH,CXCL11,DDX58,DHX58,EDN1,EIF2AK2,FAS,HIF1A,HLA-A,ICAM1,IFI16,IFIH1,IFIT1,IFITM1,IFITM3,IL15,IL15RA,IL1R1,IL23A,IL32,IL7,IRF1,IRF3,IRF7,IRF8,ISG15,ISG20,ITGA4,MAVS,MICA,MX1,NOS2,NTRK2,OAS2,OAS3,OASL,PLAAT4,PML,PTAFR,RNASEL,RSAD2,SECTM1,SP100,SPP1,STAT1,TAP1,TFRC,TLR1,TLR2,TLR3,TP53,TRIM21,TRIM22,TYMP,XDH,ZBP1	1220 (15)
APOE	1.498	transporter		1.637	0.000122	ABCA1,ACOX1,ACSL1,ACTB,ADAM10,ADGRB1,ADGRG1,ADNP,AHDC1,ANK3,ANXA11,APP,ARHGEF12,ATF4,BCAM,BGN,BMP4,CABP1,CALR,CAMK1,CAPNS1,CASP1,CASP3,CAT,CAV1,CCN1,CCN2,CCND1,COL18A1,COL1A1,CPT1A,CREB3L1,CSF1,CSRP1,CTDSP1,CTNNB1,CTSB,CTSD,CTSS,CTSV,CXCL3,ECM1,EDN1,EGR1,F2RL1,F3,FAM27E3/FAM27E4,FKBP4,FKBP5,FLOT2,GAS7,GPX3,HMOX1,HPCAL1,HSP90B1,HSPA1A/HSPA1B,HSPA5,HSPD1,HSPG2,ICAM1,IGF1R,IGFBP6,IL12A,IL1A,IL1B,IL6…	2230 (17)
reactive oxygen species		chemical toxicant	Inhibited	-2.472	0.000125	ABCC1,ADAM10,ADAM17,ADAM9,BCL2L1,CACNA1C,CASP1,CASP3,CAT,CCN2,CD24,CSF1R,CXCL8,CXCR4,EDN1,EGFR,EIF4EBP1,ERBB2,ERBB3,ETS1,F3,FAS,FGF2,FOXM1,GADD45A,GCK,GLRX,HBEGF,HIF1A,HMOX1,HPSE,HSPA5,IL1B,IL6,JUN,KLF6,LAMA1,MAFA,MCL1,MFN2,NFE2L2,NFKB1,PDX1,PMAIP1,PPP2R2A,PRDX3,PRDX5,PROK2,PTGS2,RARB,SOD2,SYP,TERT,TGFB1,TLR2,TNFAIP3,TP53,TP73,TRPV1,UCP2,VEGFA,XBP1	2046 (18)
XBP1	0.943	transcription regulator	Inhibited	-2.796	0.00013	ABCA12,ACACB,ADAM10,ALG12,ALG2,APBB2,APP,ARCN1,ATF4,ATG5,ATP2A2,BET1L,BFAR,BLZF1,CALR,CAT,COG3,COPB2,COPG1,COPZ1,CREB3,CREB3L1,CXCL2,CXCL8,DERL1,DNAJB11,DNAJB2,DNAJB9,DNAJC3,EDEM2,ERLEC1,ERO1B,ERP44,ETS1,FAS,FKBP14,FKBP7,FN1,GOLGA3,GOLGB1,GOLPH3,GOLPH3L,GOSR2,HM13,HMOX1,HSP90B1,HSPA5,HYOU1,ICAM1,IL24,IL6,LMAN1,MAFA,MAN1A1,MCFD2,NCOA3,NOS2,NR1H3,NUCB2,ORMDL3,OSTC,P3H1,P4HB,PCYT1A,PDIA2,PDIA3,PDIA5…	1488 (21)
Fgfr		group		1.985	0.000131	BCL2L1,BIRC5,CDKN1B,FGFR1,GDNF,HEY1,HEY2,HMOX1,HSPA5,LGR5,MCL1,PAX6,SOX2,SPP1	1421 (15)
HCAR2	-6.917	G-protein coupled receptor	Activated	2.177	0.000131	AVEN,CCNE2,IL1B,IL23A,IL6,IQGAP3,KIF14,KIF20A,NMI,PLK1,PTGS2,SLC37A2,TRIM8,WEE1	904 (9)
FZD8	3.191	G-protein coupled receptor		-0.67	0.000131	BIRC5,BMP2,BMP4,CCN2,CDH1,COL1A1,CTNNB1,FN1,GATA4,IGFBP5,TJP1,TP53,VCAN,VIM	1799 (11)
ERN1	0.203	kinase	Inhibited	-2.417	0.000131	ATF4,ATP2A2,CCNA1,CDH1,CEBPB,CEBPD,CLDN7,CNTN1,COL6A1,CXCL2,CYP1B1,DERL2,DGAT1,DGAT2,DNAJB11,DNAJB9,DNAJC3,EPCAM,ERLEC1,ERO1A,ERO1B,ERP44,ETS1,FAS,FITM2,GOLGA3,HDLBP,HSP90B1,HSPA5,IFITM1,IKBKB,IL1B,IL6,JUN,LGR5,LPCAT2,MCL1,MLXIPL,MORF4L2,MPZL2,NARS1,NCOA3,NOS2,NR1H3,OAS2,P3H1,P4HB,PDIA5,PDRG1,PLIN2,PPARG,PRKDC,PVR,SDF2L1,SEC24D,SEC61A1,SEL1L,SERPINB2,SLC7A1,SMARCB1,SPARC,SPTLC3,SRPRA,SSR3,ST14,TE…	1532 (19)
TNFSF10	-5.839	cytokine	Inhibited	-2.864	0.000137	AKT1,BAK1,BCL2L1,BID,BIRC2,BIRC3,BIRC5,CASP3,CASP8,CD14,CFLAR,CTNNB1,CTSB,CXCL8,CXCR4,DPYD,EGFR,EIF2AK2,FTH1,HLA-A,HLA-C,IFI16,IFI27,IFI6,IFIT1,IFITM1,IFITM2,IGF1R,IL1B,IL6,IRF9,ISG15,JUN,MCL1,MMP2,NFKBIA,PLAU,PMAIP1,PSME2,PTGS2,SERPINH1,SP100,STAT1,TFRC,TIMP1,TNFAIP2,TNFAIP3,TNFRSF10A,TNK2,TP53,VEGFA,XIAP	1906 (16)
APR-246		chemical drug		-0.451	0.000139	AKAP9,BBC3,CARD10,CD81,CDH3,DLX5,DLX6,DNAJB2,FZD7,GADD45B,GJB6,IGFBP7,LIMK2,MAP4,MAPK1,MCL1,PDS5A,PEA15,PMAIP1,RANGAP1,SCNN1A,SLC7A5,XBP1,YWHAG	1635 (7)
SPRY2	0.949	other		1.355	0.000139	AXIN2,CLDN7,EGFR,EOMES,EPAS1,EPHB4,ESRP1,ETS1,ETV4,ETV5,FGFR3,HIF1A,ISG15,LMO4,MEST,MET,NR2F1,OCLN,PFKFB3,PTEN,PTPN1,SLC2A1,SP8,ZEB1	2097 (17)
mir-182		microRNA		0.006	0.00014	ADCY6,BRMS1L,CARD11,CASP10,CDH1,CDH4,CDK6,CLDN15,COL11A2,COL4A4,FN1,FNDC3A,FOXF2,FOXO1,GHR,GRB2,ITGA4,JUP,MTSS1,NCAM1,NLGN2,PIK3CA,RASA1,RPS6KB1,SLC30A1,SLC30A7,SLC39A9,SQSTM1,VIM,ZEB1	762 (7)
ADRA1A		G-protein coupled receptor			0.00014	ADAM12,ARC,BDNF,CCNB1,CDK1,CDK2,CDKN1B,CEBPB,CEBPD,COL3A1,CTSV,DDAH1,DUSP1,EGR1,FABP5,FN1,IL6,IL6ST,JUN,LIF,LOX,MSX2,NR4A1,PAK1,POLA1,PPP3CA,PRRX1,PTHLH,STAT3,VEGFA	1419 (15)
TIMP3	-2.426	other	Activated	2.529	0.00014	ADAM10,APP,BAMBI,BMP4,CEBPB,CREBBP,CTNNB1,ENG,FAS,FKBP1A,IL6,JUN,KIT,LRP8,LTBP1,MAPK3,MET,MMP2,NFKB1,SKIL,SMAD2,SMAD7,STAT1,STAT3,TGFB1,TGFBR2,TGFBR3,VIM,WNT11,ZEB2	1990 (12)
S100a7a		other	Inhibited	-2.828	0.000143	CCND1,CSF2,CXCL1,CXCL8,IL11,IL1A,MKI67,MMP2	1323 (12)
LASP1	-3.255	transporter		0.494	0.000143	CDH1,CTNNB1,CTNND1,EPCAM,ITGA4,MARVELD2,S100A4,VIM	1726 (8)
PIWIL2	-0.545	enzyme		-1.254	0.000143	BCL2L1,CABLES1,CCND1,CDK8,CXXC4,LATS2,MAP1A,STAT3
GLI2	1.254	transcription regulator		1.586	0.000145	ATP2A1,BCL2L1,BMP4,BNC1,CCND1,CDC45,CDH1,CDK1,CDKN1B,CLEC7A,CSTA,CXCL2,CXCL3,DLX3,E2F1,FOXC2,GATA4,GLI1,GLI2,HHIP,HK2,IL15,IL1B,IL1RL1,IL6,ITGB1,JAG1,JAG2,JUNB,KRT10,MEF2C,MEOX1,MITF,MLH1,NKX2-5,NTN1,PAX2,PAX3,PFKFB3,PI3,PRKCH,PTCH1,PTHLH,RUNX2,SALL1,SMO,SOX9,SPP1,SPRR2A,TERT,TGFA,UGCG,VDR,VIM	2243 (21)
ETV4	-3.318	transcription regulator		-1.873	0.000148	ARID3B,B4GALT1,B4GALT5,CAV1,CDH1,CTNNB1,CXCL8,CXCR4,ERBB2,ETV4,FN1,HPSE,JUP,MET,MMP14,MUC4,PLEC,PTGS2,SPP1,TGFBR2,TWIST1,VIM,WWTR1	1652 (7)
CBX7	0.759	other		1.175	0.000151	ANKRD1,AREG,BMP2,CBX2,CBX4,CBX8,CDH1,CLDN1,CTSS,CXCL8,CYP1B1,GDF15,KYNU,PRDM1,UIMC1
mir-96		microRNA		1.17	0.000151	BRMS1L,CDH1,FN1,FOXF2,GHR,GRB2,IRS1,JUP,RPH3AL,SLC30A1,SLC30A7,SLC39A9,SYTL4,VIM,ZEB1
lapatinib/pazopanib		chemical drug		-1.291	0.000151	CDADC1,CDH4,CLDN12,EGFR,EGR1,EPPK1,MET,PHLDA1,PRDM1,RHOT1,TP53,VCPIP1,VPS13B,ZC3H13,ZNF507
mir-29		microRNA		1.716	0.000153	ADAM12,ADAMTS14,ADAMTS9,ANGPTL4,AOX1,ARPC3,BCL2L2,BDKRB2,CCND1,CDH1,CDK6,CLDN1,COL1A1,COL3A1,COL4A2,COL4A5,CTNND1,DKK1,DNMT3B,EOMES,FKBP5,FN1,GLDC,HMGA1,IL23A,KIT,LAMC1,LPL,MCL1,MMP2,NASP,NAV3,NID1,OLR1,PDGFA,PIK3R1,PMP22,PTEN,RUNX2,SCARB1,TIMP3,TNFAIP3,TP53,TRAF4,VEGFA,ZFP36L1	2083 (15)
lysophosphatidic acid		chemical - other	Inhibited	-4.743	0.000156	AKT2,ANKRD1,AREG,CACNA2D1,CCN1,CCN2,CCND1,CD14,CDH5,CSF1,CXCL1,CXCL2,CXCL3,CXCL8,DUSP1,EDN1,EGFR,EGR1,F3,FKBP5,GDNF,GRN,HIF1A,HYOU1,ICAM1,IL15,IL1B,IL6,JUN,JUNB,KLF5,LIF,LIPE,LIPG,LPL,NFKB1,PLAU,PLAUR,PPARG,PPP1R3B,PTGS2,RALA,RFFL,SCARB1,SPHK1,TAGLN,TP53,VEGFA,VEGFC,VIM,WNT5A	1935 (13)
mir-17		microRNA	Activated	3.49	0.000157	ABCA1,AKT1,APP,ARID4B,BIRC2,BIRC3,BNIP2,CAPRIN2,CASP7,CCN2,CCND1,CXCL8,CYLD,E2F1,E2F3,E2F5,EP300,FAS,FBXW7,FGF9,FN1,FNDC3A,H2AX,HSF2,IL6,LEF1,MAPK8,MICA,NCOA3,PHF6,PKD1,POU5F1,PTEN,RB1,RUNX1,SMAD2,STAT3,TAX1BP1,TNFAIP3,TNKS2,TP53INP1,TXNIP,ZBTB7A	2393 (19)
SIRT6	0.03	enzyme		-1.559	0.000161	AACS,ACSL4,AKT1,AKT3,ALG12,BIRC3,BIRC5,CSF1,CXCL8,DBP,ELOVL1,FABP6,GPAT4,GSK3B,IGF1R,IL1A,IL1RL1,IL6,IRAK3,IRS2,LIPH,LSS,MAPK3,NPNT,PLCB1,PLPP3,PPARGC1A,PTEN,PTGS2,RPL6,RPS15A,SOD2,SREBF2	2366 (21)
benzene		chemical toxicant		-0.574	0.000161	ARHGAP18,ATF5,BCL2L1,CASP3,CCNG1,CD47,CD63,CDK6,CHP1,COL1A1,COL3A1,CSNK2A1,ECE1,EGR1,FBXO3,IGFBP3,IL13RA1,MAPKAPK2,NCKAP1,NFKB1,PLS3,PTEN,PTPRF,RHOB,RTN4,SLC16A1,SLC9A3R1,SOS2,SPARC,STOM,TNFRSF1A,TXNIP,YWHAQ
cis-urocanic acid		chemical drug	Inhibited	-3.826	0.000164	CLDN1,CXCL8,EGFR,GADD45B,GLRX,HSPA1A/HSPA1B,IGFBP3,IL6,KCNK1,NCF2,PMAIP1,PTGS2,SERPINB2,TMOD3,TNFAIP3,ZNF165	895 (9)
ALDH1A2	9.738	enzyme		1.332	0.000165	ALDH1A3,BGN,CCN1,CCN2,COL3A1,CSF1,FGF2,HOXC8,HOXD4,IGFBP4,ISL1,KIT,MAFB,NKX2-1,NKX2-5,PCOLCE,RARB,SPARC,SPP1,TIMP1,TIMP3	1821 (16)
zerumbone		chemical - endogenous non-mammalian	Activated	2.182	0.000172	ATF4,BBC3,BCL2A1,BCL2L1,BIRC2,BIRC3,BIRC5,CASP3,CCND1,CFLAR,HMOX1,ICAM1,IL6,PTGS2,TNFRSF10A,TP53,XIAP	1875 (14)
FOXO4	4.137	transcription regulator		-1	0.000173	ACLY,ANXA3,APLN,BCL2L1,CASP8,CAT,CAV1,CCN2,CCND1,CDC42EP3,CDH5,CDKN1B,CDKN2B,CERS4,COL4A1,COL4A2,ELOVL7,ENPEP,FABP5,FDFT1,FLNB,FLT4,FOXC1,FYN,GADD45A,GADD45B,GPX3,HIF1A,IDI1,IER3,IGFBP7,IL1R1,JAG1,LRAT,NRP2,OVOL1,PRKAA2,PRKCD,PSMD11,PTGS1,PTPRB,RICTOR,RUNX2,SERPINB1,SGK1,SLC2A1,SOD2,SOX5,SOX9,SPTLC2,SREBF2,TGFB1,TXNIP,VEGFA,ZFAND5	2347 (24)
CLPP	0.32	peptidase	Inhibited	-3.353	0.000174	ACADL,ACADM,ACADS,ACADVL,ACO2,ACSL1,ATP5F1B,CRAT,CYC1,DCHS1,DECR1,DLD,ECI1,ECI2,ETFA,GAPDH,HSPD1,IDH2,IDH3G,MDH2,OGDH,PC,PDHA1,PDHB,PHB2,PPARGC1A,PRDX3,SAMM50,SDHC,SLC25A20,SLC25A4,SOD2,SUCLA2,TALDO1,TUFM,UQCRC1
PHF1	-1.385	transcription regulator		0.218	0.000175	BBC3,CCNG1,HOXA10,HOXA11,HOXA6,HOXA9,HOXB5,HOXB6,HOXB7,HOXB9,HOXC8,HOXC9,HOXD10,HOXD8,HOXD9,MYT1,TP53,TP53I3	2106 (19)
CHI3L1	1.354	enzyme			0.000175	ARL4C,BHLHE40,CALD1,CDH1,COL16A1,COL6A1,COL6A2,CXCL8,EMP1,IGFBP5,NNMT,PEG10,SERPINB1,TGFBR2,TGIF2,TMEM158,TNC,VEGFA	2072 (14)
methyl-beta-cyclodextrin		chemical drug		0.425	0.000175	BCL2L1,CAV1,CCND1,CXCL1,CXCL8,FDFT1,FOXD3,HAS2,HIF1A,IL6,LDLR,MAPT,NFKB1,POU5F1,PPARG,SCARB1,SOX2,TNFRSF8	1038 (14)
fenretinide		chemical drug		1.478	0.000179	ACER2,ANKRD1,AP2M1,ATF4,ATP1B2,BAK1,BBC3,BCL2A1,BID,BIRC2,CASP3,CCND1,CFLAR,DIAPH1,ELF3,ENAH,ERCC1,FYN,GOSR2,GRB2,GSK3B,HIF1A,IGFBP7,IL1B,IL6,JUN,MAPK6,MAPK8,MKI67,NCF2,NFE2L2,NFKBIA,NOS2,PMAIP1,PRKAR2A,PTGS2,RARB,RARG,RXRA,STAT1,VEGFA,XPO1	1620 (12)
GNA14	-2.107	enzyme			0.000179	ABCB1,ADM,AGTR1,ANKRD1,ANXA3,BMP2,BMP4,CXCL3,CXCL8,DUSP5,ENPP1,FST,GADD45A,GALE,GBP2,GRB14,HAS2,HBEGF,HK2,HSPB8,IL6,KLF6,LIF,MAP3K8,MGST1,NR4A1,OLR1,PDK1,PDLIM5,PHLDA1,PLAUR,PTGS2,SELENBP1,SGK1,SPHK1,STAT1,VEGFA,XDH,ZFP36L1	1283 (11)
PCGF2	-0.572	transcription regulator		-0.473	0.000189	BMI1,CDC25A,CDH1,CDH2,CDK6,CDK7,CDX2,CTNNB1,FN1,GATA4,HOXA7,HOXB7,HOXB8,HOXB9,HOXD4,JAG1,mir-205,MSX1,NFKB1,NKX2-2,NOTCH1,PAX3,SMAD3,TP53,VIM,ZEB1,ZEB2	1976 (17)
RUNX2	-1.387	transcription regulator		-1.321	0.000189	ABCB1,AKT1,ALPL,ALPP,AMBN,AXIN2,BIRC5,BMP2,CCND1,CDH1,CDH2,CDKN1B,CEBPD,COL1A1,COL24A1,CREB3,CXCL8,DPYSL3,EDN1,FABP6,FN1,FRA10AC1,GADD45B,GALNT3,GFI1,HIF1A,HTRA1,IGF1R,IL20RB,ISL1,ITGBL1,JAG1,LEF1,LGALS3,LUM,MKI67,MMP14,MMP2,MSX2,OLIG1,PCDH18,PIK3CB,PLAU,RGCC,RUNX1,RUNX2,SNAI2,SOX5,SOX6,SOX9,SPP1,ST3GAL5,SVIL,TAGLN,TCF7,TIMP1,TLN1,TPM1,UGCG,VEGFA,WNT10B	1978 (19)
ZFP36	-3.202	transcription regulator	Activated	3.348	0.000189	ABCG4,BIRC3,CCNE2,CDC6,CENPA,CLCN3,CLMP,COL3A1,CSF2,CTSS,CXCL2,CXCL3,E2F1,FOSL1,HIF1A,ICAM1,IER3,IL12A,IL1A,IL1B,IL23A,IL6,IRF1,JUN,KIF14,KIF18A,LATS2,LMO2,MXD1,NFKBIA,NHSL2,NUF2,PIM1,PLAU,PLAUR,PNRC1,PRDM1,PTGS2,SERINC3,SOX6,SPP1,SS18L2,TFRC,THBD,TLCD4,TOP2A,ZFP36	1674 (12)
miR-291a-3p (and other miRNAs w/seed AAGUGCU)		mature microRNA	Activated	3.355	0.000189	ADAM9,ANKRD52,APP,C3,CCND1,CD24,CD46,CDH1,CENPF,DKK1,E2F1,ERBB4,FITM2,GBP3,GLTP,GPSM2,HSPA14,INSIG2,KIF23,KLF13,LATS2,MBNL2,MED28,MFSD4B,MICA,MYBL1,NIN,NIPSNAP2,PACRGL,PCGF5,RECK,RNF149,RPIA,SLC25A23,SLC35F6,STK4,STX11,TBC1D2,TEX30,TFAP4,TGFBR2,TMEM14A,TMEM9B,TNFAIP1,TUSC2,VEGFA,ZNF226
SAMSN1	0.356	other	Inhibited	-3.647	0.000189	CMPK2,CXCL2,DAXX,EDN1,HBEGF,HDAC1,HELZ2,IFIT2,IFIT3,IL12A,IL15,IL15RA,IL18,IL23A,IL6,IRF1,IRF2,IRF7,ISG15,ISG20,LHX2,LMO4,LZTFL1,NFKBIZ,NMI,OASL,PML,PTGS2,RBL1,RGCC,RSAD2,SDC1,SH3BP5,SLCO3A1,SLFN12L,SOCS3,STAT1,STAT2,STAT5A,TCF4,TIMELESS,TLR3,TRIM21,TSC22D1,USP25,XBP1,ZC3H12A	1090 (10)
D-alpha-tocopheryl succinate		chemical reagent		-0.492	0.000196	BCL2L1,BIRC5,CASP3,HIF1A,MAPK1,MAPK3,MAPK8,PMAIP1,TP53,UCP2,XIAP	2038 (21)
HOXD10	11.971	transcription regulator	Activated	2.196	0.000196	CEACAM1,DAPP1,DIS3,DOT1L,E2F1,ERP44,EZR,FCRLA,GCNT1,HBEGF,HOXD10,HOXD9,ICAM1,ITGA3,MAGED2,MMP14,NCS1,NUDT5,PAK1,PDZK1IP1,RAB40B,RHOB,RHOC,RPSA,RSAD2,SELENON,TFPI,TFR2,TGFB1I1,TICAM1,TIMP1,TIMP2,TJP1,TTC3,USP14
JAK1	-0.122	kinase	Inhibited	-4.743	0.000203	BCL3,BID,CAPN1,CD14,CDKN1B,EIF2AK2,ENPP2,HIF1A,HLA-A,HLA-C,ICAM1,ID1,IFIT2,IL11,IL1B,IL4R,IL6ST,IRF1,IRF7,IRF9,JUNB,LIF,MAP3K8,MMP2,MX1,OSMR,PDGFB,PSMB9,RUNX1,SAA1,SLC1A3,SMAD7,SOCS3,STAT1,STAT2,STAT3,TAP1,TNFRSF21	1280 (13)
CDK2AP1	-0.828	other			0.000207	AXIN1,CDK2,CSNK2A1,CTNNB1,DAAM1,DIXDC1,EP300,FBXW4,FOSL1,FZD3,FZD5,FZD7,GSK3B,KREMEN1,MAPK8,NKD1,PITX2,PPARD,PRICKLE1,RHOU,SLC9A3R1,TLE5,VANGL2,WNT3A,WNT5A,WNT7B	2037 (18)
PRKCA	0.632	kinase	Inhibited	-2.204	0.000215	APP,ARHGDIB,ARL4C,ARPC2,BCL11A,BCL2L1,CAV1,CCN2,CCND1,COL1A1,CSF2,CSTA,CTSB,CXCL2,CXCL3,CYCS,DIAPH1,EGR1,ERBB2,ETS1,FN1,GBA,GDF15,HEY1,HSPA1A/HSPA1B,ICAM1,ID1,ID3,IFIT1,IFIT3,IGF2BP3,IGFBP3,INSIG1,JUN,LAMP2,LPL,NFKB1,NFKBIA,NOS2,NQO1,OASL,PEG10,PHLDA2,PLA2G6,PML,PPP1R12A,PRKCD,PTEN,PTGS2,PVR,RB1,RHOBTB3,RSAD2,RUNX1,RUNX2,SP100,TGFB2,TP53,USP8,VEGFA	1667 (12)
cigarette smoke		chemical toxicant	Inhibited	-3.204	0.000222	ABCA1,ADM,AHR,AOX1,AREG,ATF4,AXIN2,BCL2L1,BIK,BIRC5,C3,CASP3,CAT,CCN1,CCND1,CDC25A,CDC25B,CHRM3,CHRNA5,CKB,COL4A2,CSF2,CTNNB1,CXCL2,CXCL3,CXCL8,CYP1B1,DFFB,DNAJB2,EGR1,EPAS1,ESD,FABP5,FOSL1,FTL,G6PD,GCLM,GPX3,GRB2,GSR,GSTP1,HAS3,HIF1A,HMOX1,HSF2,HSPA5,ICAM1,IFITM1,IKBKB,IL1A,IL1B,IL6,IRAK1,JUN,MAFF,MAP1LC3A,MAP4K4,MAPK8IP3,MMP2,MUC4,MX1,MYD88,NFE2L2,NFKB1,NFKBIA,NKX2-1,NOS2,NQO1,OAS1,OAS2,OAS3,OA…	1448 (13)
nitroprusside		chemical drug		0.341	0.000226	ACTN1,ADM,BCL2L1,BDNF,BIRC5,CAT,CAV1,CFLAR,CREB1,CXCL3,DUSP6,EGR1,FAS,FLT1,FOXO1,HMOX1,IFNGR1,LAMB1,LAMC1,NOS2,PARP1,PPARGC1A,PTGS2,RHOA,SLC12A4,SLC1A4,TLR2,TP53,VEGFA,ZFP91	1877 (13)
ID3	-2.739	transcription regulator		-1.365	0.000229	ADGRG1,ADM,ASCL2,BCL2L1,BCL3,BMP7,CCNB1,CCNE2,CCNG1,CDC25B,CDC6,CDK1,CDKN1B,CEBPB,CSF1,CXCL1,CXCL8,CXCR4,CXCR5,DGKA,DTX2,DUSP1,DUSP10,DUSP22,DUSP4,E2F2,EOMES,ETS2,FOXO1,GADD45B,GNL3,HIF1A,HOMER2,ICAM1,ICOSLG/LOC102723996,ID3,IFI16,IFNGR1,IGFBP4,IKZF2,IKZF3,IL20RB,IL4R,IL6,IL7R,IRF5,IRF6,IRF8,JAK2,JDP2,KLF6,KLF7,LEPR,LGALS1,LMO2,LMO4,MAF,MAP3K14,MAP4K3,MMP2,NFATC1,NOTCH1,NR4A1,NR4A3,PAWR,PIK3R1,PP…	1544 (16)
F3	-7.897	transmembrane receptor	Inhibited	-2.769	0.00023	AREG,BRINP3,CASP7,CCN1,CCN2,CCNA1,CXCL8,DOCK4,DUSP6,DUSP9,EFEMP1,EGR1,F3,FERMT2,FGF13,FOXC2,FUT8,ICAM1,IL1B,IL6,ITGA2,KRAS,LAMB1,LEF1,MMP2,MSLN,PAK3,PLPP3,RAC1,RHOA,SEMA3A,SPRY4,TGFBR2,TGM2,TNFRSF11A,UBASH3B,VEGFA	932 (13)
NEUROG3	2.871	transcription regulator		1.999	0.000231	ABCC8,CCK,CD63,CDH2,CDH8,CTSV,DLL4,DLX6,EBF1,EFNB2,EN1,ERBB3,GCK,HES6,ISL1,LHX4,LHX6,MAFA,MNX1,NKX2-1,NKX2-2,NKX2-4,NOTCH2,NR2F1,NRP1,NTRK2,OLIG1,PAX6,PDX1,PSEN1,PSEN2,RARB,RHOB,ROBO1,RORB,SEMA3A,SEMA3C,SNAI2,SYP,ZBTB16	1465 (7)
arsenite		chemical toxicant		-1.216	0.00024	ABCB1,ABCC1,ADAM12,AHR,ATF4,ATR,CAV1,CCND1,CDH1,CDH2,CELF2,COL8A1,CXCL3,CXCL8,CYP1B1,DHRS1,DUSP1,EGR1,ESD,FHIT,FST,GADD45A,GCLM,GPC1,GSTP1,HAS2,HMOX1,HSPA1A/HSPA1B,HSPA4L,HSPB1,IER3,IKBKB,IL1RAP,INSR,IRF1,JUN,MAFF,MCL1,NBEA,NFE2L2,NQO1,NR4A1,PLCB1,PRKD1,PRKDC,PRKG1,PTGS2,PTPRG,SLC38A2,SNAI2,SQSTM1,TGFB1,TGFB2,TP53,UGDH,VEGFA,WWOX	1222 (17)
fenofibrate		chemical drug	Activated	2.567	0.000243	ABCB4,ABCD3,ACACB,ACADL,ACADM,ACADVL,ACOT2,ACOX1,ACSL1,ACSL4,ACSL5,ADIPOR1,ADIPOR2,ALDH1A2,ANGPTL4,APP,ATP11A,CASP4,CAT,CCND1,CDC25A,CDH2,CEBPB,CHEK1,COL1A1,CPT1A,CPT2,CSF1R,CXCL8,DECR1,DGAT1,DGAT2,ECI2,EDN1,EGFR,FBXO32,FGB,GADD45A,GAPDH,GBE1,GNB4,GPAM,GYG1,HIF1A,HILPDA,HMOX1,HNF1B,HOXA7,HOXC6,HSPA5,ICAM1,IL6,IL6ST,IRF8,JAG2,JUN,KPNA1,LCAT,LDLR,LPL,MAN1A1,MARK2,MEST,MGLL,MITF,MLH1,NACC1,NBN,NFKB1…	1813 (18)
RNA polymerase II		complex			0.000248	ACTB,ADAM23,ALPL,ATP6V0A1,B2M,CASP7,CBX5,CCNB1,CCNB2,CCNE2,CD14,CD82,CDH1,CHEK2,CSF1,CXCL2,CXCL8,CXCR4,CXCR5,CYP1B1,CYP24A1,DCTPP1,DHFR,DKK1,DLGAP5,DUSP1,EBAG9,ELK4,ERBB2,ERMAP,ESRRA,EXOSC8,FLT1,FOSL1,FOSL2,FOXC1,FOXC2,GADD45A,GADD45B,GAPDH,GATA4,GBP2,GDF15,GHR,HAS2,HNRNPU,HOXA11,HOXA7,HOXA9,HPRT1,HSPA1A/HSPA1B,ICAM1,ID1,IFNGR1,IGDCC3,IGFBP3,IL1B,IL6,ITGA5,JUN,JUNB,LDLR,MAP2K1,MAP2K2,MAPK1,MAPK8,…	2161 (12)
KLF5	-1.829	transcription regulator	Inhibited	-2.463	0.00025	ACADM,ACOX1,BCL2L1,BIRC5,CCNB1,CCNB2,CCND1,CDH1,CDK1,CDKN1B,CDT1,CGREF1,CTNNB1,CXCR4,DUSP1,E2F3,EPAS1,FAM110A,FGFBP1,GPSM1,HIF1A,KLF5,LAMA1,NOTCH1,PDGFA,PDGFB,PPARG,PTGES,RUNX1,SLC35F6,SOX2,TAGLN,UCP2	2104 (20)
EOMES	7.434	transcription regulator		-0.132	0.000266	ADM,AFAP1,ALCAM,ANXA1,CCK,CDH8,CEMIP,CEMIP2,CHRNA7,COL3A1,CRYM,CXCR4,CYP26A1,DNAJC15,DUSP14,DUSP4,EGFLAM,EOMES,FAT3,FOXC1,FZD8,GSC,HOXA10,HOXA13,HOXA9,IGFBP3,ITGA2,LHX1,LHX9,MEOX1,MICAL2,MIXL1,MXRA5,NAV2,NEFL,NRP2,PCDH19,PMP22,POU5F1,PRDM1,RAB17,RND3,ROBO2,SATB2,SOX2,STAT3,TCF4,TDRD7,TFPI2,TSHZ1,WNT3,ZCCHC12,ZIC2,ZNF521
XDH	-5.378	enzyme		-1.895	0.000269	ABCA1,CCN2,CEBPB,CXCL3,CXCL8,CXCR4,DUSP1,DUSP10,F3,HIF1A,ID3,IL1B,INSR,MMP14,MMP2,PLAU,PLAUR,PPARA,PPARG,SLC2A1,SPP1,TIMP2,VIM	1385 (14)
alvocidib		chemical drug		1.715	0.000269	BAG1,BCL2L1,BIRC3,BIRC5,CCNB1,CCND1,CCND3,CDKN1B,CFLAR,E2F1,EGFR,ERBB2,HOXA11,HOXA13,MCL1,RB1,RBL1,RHOBTB2,SF3B1,TP53,VEGFA,XIAP,XRCC6	2140 (20)
RET	-0.128	kinase		-0.683	0.000273	AKAP9,ANXA1,ANXA4,ATF4,BBC3,CCND1,CDKN1B,COL1A1,CSF1,CSF2,CTSB,CTSV,CXCL12,CXCL8,CXCR4,DNAJB2,DNAJC3,DUSP6,DUSP8,EGR1,EIF4G3,FKBP4,HSPA1A/HSPA1B,HSPA8,HSPD1,HSPH1,IL1B,IL6,INSM1,ITGA6,LOX,MAF,MAPKAPK2,MET,MMP14,PER3,PHEX,PITPNM1,PLAU,PLAUR,PLOD2,PMAIP1,PRNP,REEP6,RNF11,RNF19A,RTN4,SCARA3,SDK1,ST13,STIP1,STUB1,SYMPK,TIMP3,TP53,WNT11	1955 (16)
MED1	-0.21	transcription regulator		-1.34	0.000277	ACLY,ACOX1,ANAPC5,ANKRD37,AURKA,BCL11A,BCL2L1,BCL3,BCL7A,BHLHE40,BIRC5,BOP1,CCN5,CCNB1,CCND1,CCNJ,CDC6,CDK1,CDK2,CENPA,CFD,CHAF1A,CYP24A1,DTYMK,E2F1,EBF1,ERBB2,ESRRB,FOXM1,FOXO1,GADD45A,GCK,GHR,GREB1,GSTP1,HAS2,HDAC7,HPRT1,IGFBP3,INSM1,IRF8,KLF13,LBR,LEF1,LIF,MCL1,MET,NF1,NFKBIA,NR3C1,OLR1,PDK4,PEX11A,PIM1,PLK1,POLE4,POU5F1,PPARG,PRDM1,RARB,SCP2,SLC2A4,SMARCA4,SOX2,STC2,TBX3,TERT,TET1,TET2,TP53,U…	2584 (23)
BMP6	3.947	growth factor	Inhibited	-2.603	0.000279	ACADM,ADGRL2,AKTIP,ALDH1A2,ARHGAP18,ARMCX3,BMP4,CCN2,CDKN2D,CHD3,CYP1B1,DLX5,E2F1,E2F2,E2F3,E2F5,ERRFI1,ETV5,FOSL1,GNB4,HBEGF,HMOX1,ID1,ID3,IL1A,IL6,ITGA5,MATN2,MSX1,MSX2,MYH10,PCSK6,PITX2,PMEPA1,PMP22,PRKD1,PTGS2,SCEL,SEMA3A,SLC39A10,SMAD7,SMARCA1,STS,TAGLN,TIMP1,TNFRSF12A,VEGFA,XBP1,ZEB1	1946 (19)
ADRA1D	0.045	G-protein coupled receptor			0.000282	ARC,BDNF,CCNB1,CDK1,CDK2,CDKN1B,CEBPB,CEBPD,COL3A1,CTSV,DDAH1,DUSP1,EGR1,FABP5,FN1,IL6,IL6ST,JUN,LIF,LOX,MSX2,NR4A1,PAK1,POLA1,PPP3CA,PRRX1,STAT3,VEGFA	2084 (17)
PPARGC1A	8.685	transcription regulator	Activated	2.276	0.000284	ACACB,ACADL,ACADM,ACADVL,ACOX1,ADAMTS2,ADAMTS20,ADGRG1,ATP5F1B,BBC3,BDH1,BMP4,C3,CALM1 (includes others),CAT,CCN2,CEBPB,CEBPD,CIDEB,COL2A1,COL6A2,COX5A,COX6C,COX7B,CPT1A,CTSA,CTSC,CYCS,DGAT1,EDN1,EGFR,EGLN1,EPAS1,ERBB2,ESRRA,FBLN2,FBXO32,FDPS,GABPA,GAS6,GDF11,GDF15,GK,GPAM,GPC6,GRIN2C,GSK3B,HIF1A,HK2,HMOX1,IGFBP3,IGFBP5,IGFBP6,IGFBP7,IL18,IL1RAP,IL4R,IL6,INPP5J,INSIG1,INSIG2,IRS1,IRS2,ITGB1BP1,KC…	2085 (18)
Histone h4		group		-0.882	0.000284	ABCB1,ADA,BTG3,CCND1,CCND3,CDC25A,CDC6,CDK1,CFLAR,CHFR,CHRNA5,CXCL3,CXCL8,CYP24A1,DHFR,DKK1,DUSP16,E2F1,FLT1,FOXM1,G6PD,GAS1,GSTP1,HAS2,HOXA9,HPSE,ICAM1,IL1A,IL1B,IL6,IRF1,KIF1A,KIF5C,LEF1,MCM3,MEF2C,MSH2,NCAM2,NEDD4L,NEGR1,NF1,NLGN1,NLGN2,NTRK2,OAS3,PMAIP1,PPARG,PRMT3,PTGS2,RARB,RBL1,RPL10A,RPL12,RPS6,RRM2,RUNX2,SHANK2,SOCS3,SPHK1,SPP1,STAT3,SUZ12,SYNPO,TACC2,TAGLN,TBX1,TBX2,TERT,TGFBR2,TNFAIP3	2529 (22)
CAV1	-5.651	transmembrane receptor		0.682	0.000286	ADAM17,ADGRG2,AKT1,BLOC1S6,CAV1,CAV2,CAVIN1,CCND1,CD14,CDH1,CLDN7,CRNKL1,CSF1R,CTNNB1,CTSD,EGR1,FAS,FGB,FGF2,FOXA1,FOXD3,GIPC2,HK2,HMOX1,HSPA8,ICAM1,ID1,IL6,INSR,KRT18,KRT6B,KRT8,NEDD4L,NFATC1,NOS2,NOTCH1,NPM1,NQO1,NR3C2,NR4A1,NTRK2,OCLN,OSBPL7,PLA2G4A,POU5F1,PTEN,RAC1,RALA,RPS13,RPS9,SKIL,SLC1A1,SLC25A12,SLC5A5,SLC7A2,SNAI2,SOX2,SRP54,ST6GALNAC4,TFPI,TGFB1I1,TJP1,TMEM87A,TNFRSF1A,TP53,VIM,WFDC2,…	1610 (15)
AGN194204		chemical drug	Inhibited	-2.76	0.000286	ABCA1,ADAM19,AHR,ANAPC5,ANGPTL4,ANXA11,ANXA2,ARL4C,AURKA,BCL2A1,CCN5,CCNB1,CD6,CDK1,CHKA,COL6A2,COTL1,CPT1A,CRABP2,CRYBG1,CSF2,CSRP1,CST3,DENND5A,DGKA,DHCR7,DUSP1,EBF2,ELOVL3,EMP1,EPB41,F2RL1,FDFT1,FDPS,FURIN,GADD45A,GAPDH,GBP2,GBP3,GFI1,GNAI1,GNB2,GPRC5A,H2AX,HIC1,HK2,HTRA3,IDI1,IFITM3,IL11,IL4R,IL7R,IRAG2,IRF1,IRS2,KIF20A,KLF6,KRT80,LAMP1,LGALS1,LIFR,LMNA,LPL,LSS,MAN1A1,MITF,MKI67,NGEF,NPC2,NRI…	1847 (11)
ATN1	-0.727	transcription regulator			0.000287	ARHGEF28,ATP1B1,ATP1B2,BASP1,BDNF,BHLHE40,BMP1,BMP3,BTG3,CAMK4,CBFB,CDH8,CDK2AP1,DBP,DLG1,DPYSL3,EBF1,EVL,FBXW7,GAD1,GAS7,GRIN2C,GRK2,GRK5,GSN,HBEGF,HPCAL1,IFI16,IGFBP5,JUP,KAT2A,KCNC3,KCNK3,LTBP2,MARCKSL1,MAX,MCAM,NAB2,NEFH,NEFL,NFIC,NPTX1,NR2F1,NREP,PDE1B,PITPNM1,POLB,PPP1CB,PRKCD,PSME1,PTPRF,RAB2A,SATB1,SOCS2,SPP1,SPTBN2,STMN1,STX4,TAGLN3,THRA,TM4SF1,TUBA4A,VAMP1,ZIC3	686 (7)
PTGER2	-0.767	G-protein coupled receptor	Inhibited	-2.758	0.000292	APP,AREG,ARFGEF1,AURKA,CCNB2,CDH1,CDKN3,CENPE,CENPF,CEP55,CKAP2L,CSF1R,CXCL8,CXCR4,DEPDC1,ECM1,ECT2,EGR1,ESD,ESRRA,EXOC7,H2AX,IL1A,IL1B,IL23A,IL36G,IL6,ITCH,KIF20A,KIF22,MELK,MKI67,NFKBID,NOS2,NUF2,PIM1,PLK1,PTGES,PTGS2,PXN,RACGAP1,RRN3,SPAG5,SPP1,STIL,TBL3,TIMP1,TIMP2,TIMP3,TPX2,VEGFA	1707 (15)
SMARCB1	0.572	transcription regulator		-1.236	0.000296	ABCB1,ACSL1,AMPH,ATP1B1,AURKA,BAG3,BICD1,CA8,CCND1,CDC6,CDC7,CDH1,CDK1,CDT1,CEACAM1,CENPA,CENPE,CIDEB,COL14A1,COL18A1,COL1A1,CSF1,CTTN,CXCR4,DACH1,DAPK1,DHFR,DOCK4,DSC2,DSG2,E2F1,EIF2AK2,ERBB2,ETS2,F11R,FAS,FZD7,GADD45A,GMNN,GSN,HBEGF,HEY1,HOXC8,IFI16,IFITM1,IGFBP2,IL15RA,IL1A,JUP,KIF23,KLHL4,MCM10,MCM3,MCM5,MX1,NEO1,NKX3-2,OAS1,OAS3,PC,PLCL1,PLXNB2,POLA1,POU5F1,PPARG,PTMS,RAB14,RAB3B,RAB5B,RAD51…	2377 (24)
3-deazaneplanocin		chemical drug		-1.737	0.000296	AKNA,BCL2L1,CD274,CEBPB,CLDN11,DLX2,DUSP10,DUSP4,FAS,FBXO32,FOXA1,FZR1,HIF1A,HSD17B1,IGFBP3,IRF8,KLF6,LYSMD4,MAP3K14,MVP,NOTCH2,PLAU,PLXNB1,PPP1R18,PRKCA,SEL1L,SLC7A2,SNX33,SOX12,SQSTM1,TGFB1,TIMP3,TNS3,TRIM14,TSC22D3	1113 (14)
MMP12	-0.148	peptidase	Inhibited	-2.583	0.000296	ACTN1,ACTN4,ACTR3,ADK,APP,CAPZA2,CORO1C,CSF2,EIF3F,IL6,IL6ST,KIF5B,LIF,MAP4,MAPRE1,MMP14,MMP2,MYH9,NFKBIA,NPEPPS,PGM1,PKM,PLS3,PSAP,PSMB2,PSMB7,PSMC3,PSMD11,PSMD14,RDX,TLN1,TPM3,TPM4,VCP,YWHAG	2170 (20)
ATF6	-0.289	transcription regulator		-0.026	0.000296	ACOX1,APP,ATP2A2,AURKA,CALR,CDKN3,CEBPB,CHKA,CPT1A,CPT2,DAPK1,DERL3,DNAJB11,DNAJC3,FDPS,HSP90B1,HSPA5,IL6,LMAN1,LMF1,MAFA,MANF,MCL1,NUCB2,PDX1,PLIN2,PPARA,PRDX2,PRNP,PVR,SPARC,UBE2C,UNC13B,VEGFA,XBP1	2207 (22)
SNAI2	-1.211	transcription regulator		0.444	0.000296	AKT1,ANKRD1,AXL,BBC3,BMI1,BRCA2,CCN1,CCN2,CCND1,CDH1,CDH2,CLDN1,COL1A1,COL2A1,CXCL12,CXCR4,DKK1,DSP,EPCAM,FN1,ID4,ITGA3,ITGB1,JUP,KRT18,MEF2C,MMP14,OCLN,RUNX2,SNAI2,SOX9,STAT3,UBE2D3,VDR,VIM	1606 (27)
Pkc(s)		group	Inhibited	-2.919	0.000298	ABCA1,ADM,AHR,APLN,APP,AQP3,ARG2,ARNT,BCL11B,BCL2L1,BDNF,BIK,CACNA1C,CCN1,CCN2,CCND3,CDC6,CDKN1B,CDX2,CLDN1,COL1A1,COL3A1,CPT1A,CTNNB1,CTSB,CXCL8,CXCR4,DBP,DMD,DNAJC3,DUSP1,EDN1,EGFR,EGR1,EP300,F3,FAS,FGF2,FGFBP1,FN1,FOSL1,GADD45A,GADD45B,GPER1,GRHL3,HIF1A,HMOX1,HOXA7,HSP90B1,HSPA5,IL1B,IL6,IRF6,IRS1,ITGA5,ITGB1,JUN,JUNB,KLF6,KRT8,LIPA,MAFK,MAPK1,MAPK3,MMP2,NFKB1,NOS2,NQO1,NR1D1,NR4A1,NR4A3,OVOL1…	2674 (18)
SASH1	-0.996	other	Inhibited	-3.569	0.000299	ACP3,CMPK2,DAXX,EDN1,HDAC1,HELZ2,HHEX,IFIT2,IFIT3,IL12A,IL15,IL15RA,IL18,IL6,IRF1,IRF7,ISG15,ISG20,LMO4,MET,NFKBIZ,NMI,OASL,PML,PTGS2,RBL1,RSAD2,SH3BP5,SLCO3A1,SLFN12L,STAT1,STAT2,TCF4,TIMELESS,TLR3,TRIM21,TSC22D1,USP25	753 (7)
IKZF3	-6.196	transcription regulator	Activated	2.566	0.000299	ANOS1,BCL2L1,BCL2L2,BCL9L,CAV1,CAV2,CCND3,CDKN1B,CEMIP2,DDX58,DKK1,DOCK4,FN1,GAS6-DT,IFI27,IFI6,IFIT3,IFIT5,IGSF11,INAFM2,IRF7,KIF16B,LHFPL2,MAN1C1,MGLL,NFKBIZ,RNF213,RTP4,RYR1,SCN9A,SHISAL1,SIPA1L2,SMAD3,SOX9,SPRR2A,SPSB1,TNS3,YPEL2
sulindac sulfide		chemical drug		0.226	0.000299	ADRA2C,AGTPBP1,APP,BAD,BCAM,BCL2L1,CCN2,CCND1,CEBPB,CYP1B1,EGR1,ESD,GADD45A,GARS1,GDF15,IFRD1,IL24,INSIG1,MSMO1,MSX1,NQO1,NUP133,NUTF2,PIK3R1,PLAU,PPARD,PPP2R2A,PRSS23,PSG5,PTGES,PTGS2,RANBP1,SPTBN1,STAT3,STC2,TUBA4A,XRCC6,YWHAE	1761 (14)
BMS-690514		chemical drug		-0.655	0.000312	BBC3,CCNB1,CCND1,CCND3,CDK1,CDKN1B,CTSF,CTSH,CYCS,DNAJC9,HSPA4,HSPA8,HSPH1,MCL1,MCM10,MCM3,MCM5,MCM6,MCM7,PPARA,PPARG	2244 (11)
MESP2	-0.537	transcription regulator	Activated	2.887	0.000312	FOXC1,FOXC2,GATA4,HAND2,LMO4,MEF2C,NKX2-5,PAX3,SNAI2,TWIST1,UNCX,ZEB1,ZEB2
MASTL	0.49	kinase	Inhibited	-2.82	0.000313	ACVR1,ANLN,ARHGDIB,ASAP1,ATP2A2,BMPR2,CCDC50,CDK6,COPG2,CUL5,CYP1B1,DUSP11,E2F3,GNG12,HYOU1,KYNU,LPP,MYH10,NUP160,PACSIN2,PRKAA1,RAC2,SH2B3,STK24,TPM4,TTC38,TUBB6
FGF10		growth factor	Inhibited	-3.532	0.000317	AHNAK,ANXA1,ANXA2,ANXA3,BMP4,CEBPB,CTSB,CTSH,CYP1B1,FOXF1,HOXB13,LDLR,LFNG,LIPE,LMO7,LRPAP1,LSS,MMP14,NUMB,PDX1,PERP,PTEN,PTGS2,SOX2,SOX9,SPRY2,TGFB1,TIMP3,TMEM123,TMOD3,VNN1	1927 (13)
TAF4	-0.216	transcription regulator	Activated	2.419	0.000318	ABI1,ABL2,AREG,BCL2L1,BDNF,CARMIL1,CCN2,CCND1,CDH1,CDH3,CLDN1,DLX2,E2F2,EGFR,EPGN,ETS1,GAS1,GAS6,GTF2A1,HBEGF,ITGA6,KLF5,KRT34,KRT6B,LUM,MAFF,MAFK,MAP3K6,MAP4K4,MMP2,MSX2,MXD1,OAS1,PDGFA,PDGFC,PPARGC1A,RUNX1,SCUBE1,SPP1,TAF10,TAF13,TAOK2,TGFB1,TGM1,THBS2,VEGFC,WNT9A,WWC1	748 (7)
SRSF1	0.687	other		0.208	0.000332	AURKA,BIRC5,CDH1,COL1A1,ENG,FN1,HNRNPH1,HNRNPL,KLF6,LMNA,MAGOH,MST1R,PLK1,RAC1,RRM2,SRSF1,SRSF7,TP53,VEGFA,VIM	1849 (12)
proteasome inhibitor PSI		chemical - protease inhibitor		-1.038	0.000332	BMP2,CXCL2,CYP27B1,FAS,HMOX1,HSPA5,IL6,MAPK6,MCM10,MMP11,NFE2L2,NOS2,PRKCA,PSEN1,RUNX2,SMAD3,SQSTM1,SYK,TJP1,TP53	2143 (17)
ATG16L1	-0.457	enzyme		1.718	0.000332	CXCL2,GRN,IL18,IL1A,IL1B,IL6,NFKBIA,SOD2,SQSTM1	1123 (12)
NMNAT1	-0.577	enzyme		-0.662	0.000332	ATXN10,NELL2,NPY1R,PEG10,RAPGEF4,SOCS2,TFPI,TGFB2,TMSB15A	1729 (11)
MEOX1	6.862	transcription regulator	Activated	2.588	0.000332	BMP4,GATA4,GLI1,GLI2,MEF2C,MEOX1,NKX2-5,NKX3-2,SIX2
IFNL4	-1.969	cytokine	Inhibited	-2.98	0.000332	CXCL11,DDX58,DHX58,IFIH1,ISG15,MX1,OAS1,OAS2,STAT1	766 (9)
largazole		chemical - endogenous non-mammalian		1.744	0.000332	ACSL5,ANGPTL4,FGF2,GAPDH,HIF1A,HK2,PDK1,THNSL2,VEGFA
ATG7	0.604	enzyme		1.1	0.000333	ACACB,ACLY,ACSL1,ATF4,CASP3,CASP7,CCN2,CDH2,CDH5,CTSB,CXCL8,HIF1A,HK1,HK2,HPRT1,IFIH1,IKBKE,IL1B,IL6,IRF3,LAMP1,LIPE,NFKBIA,NQO1,PDLIM1,PLIN3,ROBO3,S100A4,SCARB1,SLC2A1,SNAI2,SOCS3,SQSTM1,SREBF2,TBK1,TET1,TGFB1,TGFBR2,TNFRSF1A,TP53	1934 (18)
TBX2	1.933	transcription regulator		-0.285	0.000333	ANLN,ATF5,AURKA,BHLHE40,CCNB1,CCNL1,CDC6,CDCA3,CDH1,CDK1,CDT1,CHAF1B,CHEK1,CKAP2,CKS1B,DBP,E2F1,E2F7,ELK3,FAM120B,FOXM1,HEY1,MCM5,MCM6,MCM7,NCAPD2,PAXBP1,PCGF6,PHTF2,PKMYT1,PLK1,PTEN,RBL1,SGO1,SREBF2,TGFB2,TIPIN,TRIB3,ZKSCAN3,ZNF329	2031 (15)
FBXW7	-0.758	enzyme		-0.589	0.000335	ADAM17,APP,BIRC5,CDKN1B,CEBPD,COL1A1,CREB3L1,DGAT1,DGAT2,FDFT1,FGFBP1,GFI1,GPAM,HEY1,HMGB1,HSPA8,HSPB1,HSPH1,ITGB3BP,JUN,KLF5,LDLR,MCAT,NFE2L3,NFKB2,NOTCH1,NQO1,NR3C1,PPARG,PPARGC1A,RHOB,SQLE,STAT2,STIP1	2320 (23)
pirinixic acid		chemical toxicant		-1.001	0.000336	ABCA1,ABCB4,ABCC1,ABCC3,ABCD3,ACACB,ACADL,ACADM,ACADS,ACADVL,ACOT2,ACOX1,ACSL1,ACSL4,ACSL5,ADIPOR1,ADIPOR2,AKR1C3,ALDH9A1,ANGPTL4,ANXA2,ANXA7,AQP3,ASL,ATP11A,BMP7,BPGM,C3,CAT,CCK,CCNB1,CCND1,CCND3,CCT3,CCT7,CD63,CDH2,CDK1,CDK2,CDKN1B,CEACAM1,CFH,CGB3 (includes others),CHAF1B,CHEK1,COL1A1,CPT1A,CPT2,CTSB,CXCL12,CXCL3,CXCL8,DECR1,DECR2,DNAJB2,ECI1,ECI2,EGFR,ELOC,ELOVL1,ELOVL3,F3,FABP5,FAS,FGB,FKBP1…	2123 (17)
ANXA7	-0.865	ion channel		0.483	0.00034	BCL2L2,BRCA2,CCNB1,CDH2,CRABP2,CTSB,ELF1,EPHB2,ERCC5,FGF9,FST,FYN,GDNF,GNB2,GSR,GSTP1,ITGA2,ITPR1,ITPR3,MGST1,MLH1,NR3C1,PAX6,PDX1,PHLDA1,PML,PTEN,RAD21,RAD23A,RAD23B,SERPINB6,SIM2,TFDP1,TSG101,UBE2B,VHL,WT1	1027 (7)
PS-1145		chemical - kinase inhibitor		1.788	0.000346	BIRC2,CSF2,CXCL1,CXCL8,E2F1,HSPA5,ICAM1,IL6,IRF1,NFKBIA,PTGS2,RB1,TNFAIP3,UACA	1871 (15)
ILK	0.02	kinase		-0.458	0.000348	CCND1,CDH1,CNKSR3,CTNNB1,DHFR,E2F1,ERBB2,FN1,GSK3B,HNRNPA1,HSPA8,IKBKB,IL1B,IL6,ITGA6,ITGB1,KRAS,LEF1,MAPK1,MAPK3,MMP2,NOS2,NOTCH1,RICTOR,TGFB1,ZEB1	2007 (17)
simvastatin		chemical drug		1.402	0.000349	ABCA1,ABCB4,ACP5,ACVR1,ADAMTS13,ADCYAP1R1,ADRB2,ANXA1,ANXA3,APP,ARHGDIA,ASL,ATP13A1,BCL2L1,BIRC5,BMP2,CACNA1C,CACNA1G,CALD1,CASP3,CCN1,CCN2,CCND1,CD14,CD81,CD9,CDH1,CDK5,CDKN1B,CFLAR,COTL1,CXCL2,CXCL3,CXCL8,DDAH1,E2F1,EDN1,ELAVL1,ENC1,ETV4,F3,GPAT4,GSK3B,HK1,HMOX1,HS3ST1,ICAM1,IGFBP3,IL18,IL1B,IL23A,IL6,IMPACT,IRF1,KIT,LDLR,LGALS8,LPL,MAPT,MKI67,MMP2,MPP6,MYH10,NCF2,NFATC1,NFKBIA,NONO,NOS2,NRIP1,…	1802 (13)
ROCK1	-0.026	kinase		-1.42	0.000349	APP,CCN2,CCND1,CCND3,COL1A1,COL3A1,COL4A2,COL5A1,COL6A2,COL8A1,E2F1,EDN1,ETS1,FBLN2,FBN1,ICAM1,LAMA4,LAMC1,TGFB2	2117 (20)
NF1	-1.048	other		-1.249	0.000349	AXIN2,BCL2L1,CBS/CBSL,CCND1,CTNNB1,FGF2,GLI1,KRAS,MAF,MRPL15,MXD1,NPM1,OLIG2,PDGFA,PDGFB,RPL10A,RPL21,RPS19,XIST	2071 (17)
TRIM37	-0.184	enzyme		0.471	0.000363	BCL2L10,CD63,CDT1,CKB,CUL1,DDR1,EGR1,IFIT2,IL24,JPH3,PARP9,PAWR,PLCB3,RASSF5,RASSF9,SELENON,TP53,WNT10B	1524 (13)
BAG1	-0.644	other		-0.754	0.000363	BCL2L1,CCND1,EGFR,FKBP5,FRK,GADD45A,GRN,HRK,JUN,MAPT,MT2A,NEDD4L,NR3C1,PLAU,PTGS2,RAB27A,TP73,UAP1	2459 (17)
PARG	0.004	enzyme		0.925	0.000366	DNAJC12,GDF15,IL1B,ITPR1,LGALS3BP,MTR,NELL2,NOS2,NVL,PARP1,PTEN,PTGS2,RAPGEF4,SOCS2,TMOD3	1489 (11)
HOXA11	4.399	transcription regulator		0.657	0.000366	ANXA1,CD47,CDKN1B,COL1A1,CTSV,EGFR,GDNF,HOXA11,ITGA8,NRCAM,PDGFA,RUNX2,SIX2,SPP1,ZKSCAN8
SPZ1		transcription regulator		-0.312	0.000366	CCND1,CDH1,CDH2,E2F1,FN1,HIF1A,MAPK1,MAPK3,MKI67,SNAI2,TWIST1,VEGFA,VIM,WNT5A,ZEB1	1248 (7)
SOX11	2.672	transcription regulator		0.895	0.000369	ADAM10,ADAM9,BCL7A,BMP2,BMP4,BST2,BTNL9,CACYBP,CASP6,CAV1,CCDC186,CCND1,CD19,CD24,CD58,CD9,CUL1,CXCR4,DBN1,EBF1,EGR1,EP300,ERBB4,FAS,FCMR,FGFR3,GSK3B,HILPDA,HS3ST1,HSPD1,IER2,IFIH1,IKZF3,IL1RL1,IL6,IL6ST,ITGA4,ITGB1,KLK6,LCK,LEF1,LGALS9,MAP3K7,MAPK8,MSI2,MYO1B,NIPSNAP1,NLK,NREP,NTN1,PDGFA,PPP2CA,PPP3CA,PRDM1,RNF122,RUNX2,SETMAR,SMAD3,STAT1,SUV39H2,TBL1XR1,TMSB15A,TNKS,TP53INP1,TUBA1A,WNT4	1781 (11)
tributyltin		chemical reagent		0.884	0.000371	ABCA1,ACLY,ACOX1,ACSL1,AHR,ANGPTL4,ATP5F1D,ATP5MC1,ATP5MC2,BMPR2,CCN2,CCN5,CCNE2,COL1A1,COL3A1,COL5A1,COL6A1,COL6A2,CYCS,DGAT2,EBF2,ELOVL3,ETFA,F2RL1,FN1,GPRC5A,GSTM2,HTRA3,IFIT2,IFIT3,IL11,IRF7,ITGA3,KRT80,LPL,MITF,NDUFS2,NDUFV1,NDUFV3,NGEF,PALM3,PARM1,PDE1B,PDK1,PDK4,PEAR1,PPARA,PPARG,PPL,RCAN2,SNTB1,STAC2,STAT1,STAT2,SYNPO,THBS2,TNC,UQCRC1,UQCRC2,ZNF423	1261 (16)
epicatechin gallate		chemical drug		0.365	0.000374	CCNG1,CXCL8,GDF15,ICAM1,IL6,LYN,MLH1,NOS2,PERP,PTGS2,RARB,RPRM,TP53I11,TP73,VEGFA,ZMAT3	1997 (16)
wortmannin		chemical - kinase inhibitor		1.473	0.000376	AGTR1,AKT1,AQP3,ARRB1,BCL2L1,BDNF,BIRC5,CASP3,CCN2,CCND1,CCND3,CD14,CDH1,CDK2,CDKN1B,CDKN2B,CDKN2D,CEBPD,CFLAR,CKB,COL1A1,COL3A1,CREB1,CSF1,CSF2,CTNNB1,CXCL16,CXCL8,E2F1,E2F2,E2F3,EGR1,ERBB3,EZR,F3,FN1,FOXC2,GCK,GSTP1,HAS2,HIF1A,HMOX1,ICAM1,IDE,IGF1R,IL12A,IL1B,IL23A,IL6,INSR,IRF1,IRF8,IRS1,IRS2,JUN,KRAS,M6PR,MAF,MCL1,MMP14,MMP2,MSN,MT2A,NFE2L2,NFKB1,NFKBIA,NOS2,NR4A1,NR4A3,NT5E,OGT,OPRD1,PLAU,PP…	1402 (13)
VDR	-2.715	transcription regulator		-1.184	0.000384	ABCC3,ACOX1,AGTR1,AKT1,AKT2,ANLN,BCL2L1,BMP7,CCNB1,CCND1,CCND3,CD14,CDC45,CDH1,CDT1,CEBPB,CENPA,CHAF1A,CHAF1B,CLIP1,COL1A1,COL4A1,COL4A2,CPT2,CSF1,CSF2,CXCL8,CYP24A1,CYP27B1,DCTPP1,DOK1,EDN1,EGFR,EGR1,F3,FABP6,GADD45A,GATA6,GLI1,GNAI2,HIRA,HK2,ICAM1,ID1,IER3,IFI44L,IGFBP3,IGFBP5,IL18,IL1A,IL6,INCENP,IQGAP1,ISG15,JUN,KEAP1,KIF22,KLK5,LBH,LDLR,LGALS1,LIPE,LPL,MAGI1,MYD88,MYH3,NASP,NCAPD2,NFATC1,PDL…	1964 (19)
everolimus		chemical drug		1.092	0.000386	ABCA1,ABCB10,ASCL2,AXIN2,BBC3,BCL2L1,CAV1,CCN2,CCNB2,CCND1,CCND3,CDK1,CDKN1B,CEBPB,CTNNB1,EGFR,LGR5,MCL1,MMP2,NCEH1,NKD1,RPS6,SLC2A1,SOAT1,SOX9	1987 (16)
SAHM1		chemical reagent		-1	0.000386	ABLIM1,AKAP1,ANKRD37,BHLHE40,CFH,DHX37,DOCK5,ELMO1,FLNA,HES4,HK2,ID1,JAM3,MPI,NT5DC2,PDK1,PFKFB3,PPARG,PUS7,RHOBTB1,RHOU,RPUSD3,TBC1D4,WDR4,ZFP36L2
NOTCH1	-1.289	transcription regulator		-1.293	0.000387	ADAM19,ANKRD1,AQP3,BCL2L1,BIRC2,BIRC3,BMP2,CCN1,CCN2,CCND1,CCND3,CD14,CD82,CDCA7,CDH1,CDK2,CDKN1B,CEBPB,CEBPD,CFD,CFLAR,COL1A1,CSF1R,CTNNB1,CXCL1,CXCL8,CXCR4,DKK1,DLD,DLL4,E2F1,ECT2,EFNB2,EGFR,EPAS1,EPHA4,ERBB2,ERBB3,FGF2,FLT1,FOSL1,GATA2,GATD3A/GATD3B,GLI1,GLI2,GLUD1,GRN,HEY1,HEY2,HEYL,HIF1A,HMOX1,HSPA8,HSPH1,ICAM1,ID1,IFI16,IGF1R,IGFBP2,IGFBP3,IGFBP4,IL12A,IL18,IL1A,IL23A,IL6,IL7R,IRF1,IRF8,ITG…	1934 (14)
IRF4	2.851	transcription regulator	Activated	2.604	0.000396	ADA,ALPL,ATF4,B2M,CANX,CASP10,CCNB1,CCNC,CDK1,CDK2,CDK6,CFLAR,CSF2,CTSS,CXCL11,CXCL3,CXCR4,ELL2,EOMES,ERBB3,EZR,FLT1,GALNT2,GBP1,GRB2,HSPA8,IKZF2,IL12A,IL15RA,IL1B,IL1R1,IL6,IL7R,INPP5D,IRF1,IRF5,IRF7,IRF9,ISG15,ITGB1,JAK2,MANF,MAPRE1,MIR155HG,OAS1,PHF11,PIM2,PLAUR,PLSCR1,PPIB,PRDM1,PRKCA,RAB7A,RAC1,RHOA,RHOB,RORA,RPL6,SLC2A1,SMARCA4,SPP1,STAG2,STAT1,STAT2,TCF7,TK1,TNFRSF8,TRIM21,TRIM65,UBE2H,XBP…	1483 (12)
GDF2		growth factor	Inhibited	-3.197	0.000415	ANXA3,BID,BMPR2,CAV1,COL1A1,CXCL12,CXCL8,CXCR4,DLX5,EDN1,EFNB2,EGFR,ELOVL1,EMB,ENG,ENPP2,ENTPD6,FGFR3,FOXC2,GADD45B,GATA2,HIF1A,HSPB8,HTRA1,ICAM1,ID1,ID3,MDFI,MSX1,MSX2,NFKBIA,NGFR,NINJ1,NRCAM,NRP1,PIM3,PROX1,PRPS1,RAMP1,SEMA3B,SEMA3C,SERPINE2,SLC3A2,SMAD7,SOCS2,SPP1	1651 (14)
romidepsin		biologic drug		0.04	0.000415	BCL2A1,BCL2L1,BIRC2,CCND1,CDKN1B,CDKN2B,CDKN2D,CFLAR,CXCL8,DUSP1,DUSP6,EGFR,EGR1,ERBB2,FGF2,GSN,HIF1A,ICAM1,INSR,ITGAV,JUN,MCL1,MICA,MLH1,NF2,PLAUR,PTGS2,RAB3IP,RAC1,RAF1,RHOA,RHOB,RHOC,SERPINB2,SLC26A2,SPRY2,TERT,TIMP3,TP53,VHL,XIAP	1911 (15)
DACH1	12.56	transcription regulator		0.837	0.000426	BMP4,CCNE2,CDC25A,CXCL3,CXCL8,EFEMP1,EGR1,FGF2,FGF5,FGFR1,ID1,IER2,IGFBP3,IL6,JUN,MEF2C,PAK3,PLAC1,POU5F1,PTGS2,SOX2,STC2,TGFB1,TNFAIP3	1756 (12)
nitrofurantoin		chemical drug		-1.557	0.000429	ACADM,ACADVL,ACOX1,ACTB,ACTG1,ANXA2,ASL,BCL2L1,C3,CAPN2,CASP3,CASP6,CASP7,CAT,CCND1,CCNG1,COL2A1,CPS1,CPT1A,CST3,CTSB,CTSS,CTSV,CXCL3,ERBB2,FAS,FGB,GADD45A,GSR,GSS,GSTP1,GTPBP4,HMOX1,HSPA5,ID1,IER3,IFRD1,IGFBP3,IL1B,IL6,ITGB1,LCAT,LGALS3,LOX,MAP2K1,MAPK3,MAPK8,MET,MMP14,NFKBIA,NQO1,PCYT1A,PRDX1,PRDX2,RPL13,RPL27,RPL6,RPS6KB1,RPS8,RPS9,S100A10,S100A11,SCP2,SDC1,SELENBP1,SELENOP,SERPINA1,SPP1,STMN1…
MEF2D	-0.73	transcription regulator		0.049	0.000432	BCL2L2,BDNF,CCN2,CCND1,CCND3,CCNE2,CDC6,CDH1,CDK2,CDT1,COL3A1,FN1,GCLM,HDAC5,HDAC9,HMOX1,JUN,JUNB,MCM3,MCM5,MCM6,NFE2L2,NQO1,NR4A1,PPARA,PPARGC1A,PTEN,SLC2A4,SLC7A11,SOD1,SOD2,SRXN1,SYK,TGFB1,TGFB2,VIM,ZEB1,ZFP36	1160 (10)
ZNF652	0.315	other			0.000433	EGFR,SMAD2,TCF12,TGFB1,TGFB2,TGFBR2,VIM
PTBP3	-1.603	other		1.237	0.000433	CDH1,CDH2,CTNNB1,FN1,VIM,ZEB1,ZEB2
CUL7	-0.879	enzyme		1.141	0.000433	BIRC5,CDH1,CDH2,SNAI2,TP53,VIM,ZEB1	2013 (13)
SMAD2	-1.556	transcription regulator	Inhibited	-3.233	0.000434	ADAM12,BGN,CCN2,CDH1,CDH2,CDH5,CDKN2B,CDX2,CKS1B,COL2A1,DAPK1,FDFT1,FLT1,FN1,FSTL3,FURIN,GADD45B,GSC,HAS2,HHEX,HMOX1,IL6,INPP5D,ITGB1,LINC00842,MET,MIXL1,MMP2,MUC4,NET1,PDGFB,POU5F1,PTHLH,RAC1,RUNX2,SKIL,SMAD2,SMAD3,SMAD7,SNAI2,SOX2,SPHK1,TIMP3,TPM1,TPM2,TPM3,VEGFC,XIAP	2198 (16)
AR	3.769	ligand-dependent nuclear receptor	Inhibited	-2.873	0.000441	ABCA1,ABCC4,ACP3,ACTR3,ADGRA3,ADM,AK3,AKR1C3,AKT1,AMH,ANKRD1,AQP3,ARHGEF7,ATAD2,ATP2A2,B4GALNT1,BASP1,BCL2L1,BIRC5,BMP4,BMPR2,BPGM,C3,CACNA1C,CALCB,CALU,CAMKK2,CAST,CAV1,CAV2,CCNA1,CCND1,CCT3,CDC25B,CDH1,CDH2,CDKN1B,CDT1,CEBPB,CENPE,CFLAR,CHRNB1,CHTF18,CKAP4,CLDN11,CLGN,CLSTN1,COL3A1,CTNNB1,CUX1,CUX2,CXCL12,CYC1,DCTPP1,DEGS1,DEPDC1,DHCR7,DNAJB9,DSC2,DSG2,EDN1,EGFR,EGR1,EHD3,ELK4,ELMO1,ELOVL2,EMB,…	2390 (17)
CD28		transmembrane receptor	Inhibited	-2.702	0.000447	ACTR3,AHCYL1,AHR,ANXA1,ARHGDIB,ATP11B,ATP5F1C,BCL2A1,BCL2L1,BHLHE40,BIN1,BZW1,CASP3,CASP6,CASP8,CBL,CCND1,CCND3,CD226,CD274,CDK2,CDK6,CDK7,CDKN1B,CENPF,CFLAR,CHRNA5,CLIP1,CNIH4,COX6C,CSF2,CXCL2,CXCL8,CXCR4,CYC1,CYCS,DDX58,DGKA,DUSP14,DUSP22,EOMES,FBL,FDPS,FYN,GAPDH,GBP1,GBP2,GLI1,GNL2,GOLGB1,GTPBP4,GUCY1B1,HAX1,HGS,HK2,HMGN1,HNRNPA1,HOMER2,HSPA1A/HSPA1B,HSPA8,IFITM1,IFNGR1,IFRD2,IGF1R,IGFBP5,IGFB…	1390 (14)
epigallocatechin-gallate		chemical drug	Activated	3.191	0.00045	ACP5,ADAM10,AHR,APP,AXIN1,AXL,BAD,BAK1,BCL2L1,BCL2L2,BHLHE41,BIRC2,BIRC5,CACNB3,CASP1,CASP3,CASP6,CASP8,CAT,CCN1,CCN2,CCND1,CDH1,CDKN1B,CEBPB,CFLAR,COL18A1,CSF2,CTNNB1,CXCL1,CXCL2,CXCL3,CXCL8,DAPK2,EDN1,EGFR,EGR1,ELF1,ERBB2,F3,FAS,FN1,FOSL1,FOSL2,GADD45A,GADD45B,GBP3,GBP4,GDI1,GLI1,GSR,HIF1A,HMGB1,HMOX1,ICAM1,IGF1R,IL18,IL1A,IL1B,IL1R1,IL6,IL6ST,IRF1,ISG15,ITGAV,JUN,JUNB,JUP,LAMP1,LDLR,MKI67,MMP2…	1475 (12)
PAF1	-0.092	other	Inhibited	-3.975	0.000451	ARL4A,BAMBI,BIRC3,DDX58,HELZ2,HERC5,HOXA9,IFI44,IFI44L,IFIT3,IFITM3,ISG15,ISG20,MXD1,NFKBIZ,OAS2,OAS3,OASL,PLAUR,RAET1L,SDC4,SERTAD1,SNPH,SOD2,ULBP2,ZC3HAV1,ZFP36,ZNFX1
ITGA5	-1.515	transmembrane receptor		-1.836	0.000451	CCND1,CDH2,CDK2,CDKN1B,CEBPB,CHRD,COL2A1,ENPP2,ERBB2,GAS1,HOXB9,IGFBP2,IL12A,IL1B,IL6,JUN,JUNB,MMP14,MMP2,NOS2,PAX3,PLAU,PLAUR,PXN,RAC2,TGFBR2,WNT9A,XIAP	2209 (21)
TEAD3	-2.821	transcription regulator		-1.134	0.000451	ADM,AK5,BBOX1,CALD1,CCN1,CCN2,COL3A1,EDN1,FILIP1L,IGFBP5,KAZN,LIMCH1,LOXL1,MTMR10,NFKBIZ,PCDH18,PDGFRL,RHOBTB1,SAMD5,SDC2,SH3BP4,SH3D19,SLFN5,SULF1,TAGLN,TLE1,TPM1,TRNP1
CNR1	-1.15	G-protein coupled receptor		-1.076	0.000466	ALPL,APBB1,APCDD1,ARTN,BCL11B,BDNF,BIRC5,BMP2,BMP4,BMP7,CA9,CCNB2,CDCA3,CDK1,CEACAM1,CORO2A,DKK1,EOMES,EPS8,ERBB2,ERRFI1,FGF2,FOXM1,GAD1,GDNF,GLO1,HEY2,HEYL,HOXD13,HPRT1,HSPA4,IGF1R,IL6,KLK7,KRT6B,LAMA1,MSX1,NDN,NR3C1,NTN1,PAFAH1B1,PAX3,PAX6,PIK3C2A,PLAU,PLSCR1,PTGS2,PTK2B,PTK6,RAC1,RAD21,RGMA,RXRG,SCARB1,SIX1,SLC2A4,SLC35B2,SLIT2,SMURF1,SOX6,STAM2,STAT3,SUFU,TGFB1,TIMP1,TJP1,UPK2,VEGFC	2179 (15)
thalidomide		chemical drug	Activated	2.771	0.000469	APP,BCL2L1,BIRC3,CAV1,CFLAR,COL1A1,CRBN,CXCL8,DKK1,FGF2,GADD45B,GDF15,ICAM1,IL1B,IL6,NRP1,NRP2,PDGFB,PIM1,PLAUR,TERT,TGFB1,VEGFA	1832 (15)
FADD	-0.258	other		0.01	0.000473	ASB13,BIRC3,CASP3,CASP7,CDK1,CDK2,CDK6,CDKN1B,CTNNB1,CXCL2,CXCL8,CXCR4,DDX58,DHX58,DLX1,EGR1,EIF2AK2,ELAVL2,ETNK1,FAS,FOXM1,GADD45B,ICAM1,IFIH1,IFIT2,IL6,IRF5,IRF7,JUN,JUNB,KLF6,NFKB1,PIM1,PSMB8,RNF114,RNPC3,SFXN2,ST8SIA4,STAT1,STAT2,TIAM2,TIPARP,TLR3,TNFAIP3,USP25	1096 (15)
4-phenylbutyric acid		chemical - endogenous mammalian		0.828	0.000473	ABCA1,ACOX1,ADIPOR2,ATF4,ATP2A3,CALR,CASP3,CASP8,CCND1,CDV3,CFLAR,CNP,CXCL12,CXCL8,DNAJB9,EIF2S2,ELP2,GFER,GSN,HIF1A,HLA-A,HSP90B1,HSPA4,HSPA5,IL6,LPAR6,MMP2,MXD1,NOS2,OLR1,PEX11A,PSMC3,PSMD10,PTGS2,SELENOP,SERPINA1,SOD2,SP3,STK10,STRN3,TAF7,TCERG1,TIMP2,XBP1,YPEL5	1481 (15)
IRS1	-3.15	enzyme		0.822	0.00048	ACTR3,AP2A1,ATP2A3,BMP6,CCND1,CDH1,CDKN2B,CEBPB,CEBPD,COL3A1,COL4A1,COL4A2,COL6A1,COL7A1,CRABP2,DBN1,DBNL,DVL2,EFNB2,EGR1,FBXO32,FHL1,FST,GCK,GJB3,GLRB,HMOX1,IGFBP4,IL6,INSR,IRS1,IRS2,LAMA4,LDLR,LPL,MAPK12,MEF2C,MMP14,NDN,NFKBIA,NR2F1,NRP1,PAX3,PDGFA,PIK3R1,PLPP3,PPARG,PPARGC1A,PPARGC1B,PRDM16,PTPRF,RHOU,SLC2A4,SNAI2,SPP1,SREBF2,TAGLN,THRA,TRIB3,UCP2,VEGFA,WNT5A	2001 (20)
celecoxib		chemical drug		0.769	0.000482	AKT1,APP,ATF4,ATR,BAK1,BCL2A1,BCL2L1,BFAR,BIRC2,BIRC5,CASP3,CCND1,CDH1,CDKN1B,CENPF,CFLAR,CHEK1,CLDN4,COL3A1,CTNNB1,DNAJB9,E2F1,F3,FAS,GADD45A,GDF15,GSK3B,HIF1A,HMOX1,HRK,HSPA5,ICAM1,IGF1R,IL1B,IL7,MAGI1,MAPK8,MCL1,MET,MKI67,MMP2,NOS2,PPARD,PPARG,PTGS2,RAF1,RARB,RIPK2,SLC25A4,ST3GAL4,TGFBR2,TLR2,TNFRSF10A,TNFRSF11A,TP53,TP73,TRAF4,TRAIP,VEGFC,WNT5A	1999 (16)
mono-(2-ethylhexyl)phthalate		chemical toxicant		0.564	0.000486	ACACB,ACADL,ACADM,ACADSB,ACADVL,ACO2,ACOX1,ACSL1,ACSL4,ADIPOR2,ANGPTL4,ATP5F1B,ATP5F1D,ATP5PB,CAMSAP1,CPT2,CYC1,DGAT1,DGAT2,FAM98A,FAS,G6PD,GAPDH,GCK,GFPT1,GNPNAT1,HK2,IDH3G,IER2,IL1B,IRS2,JUNB,KIF5B,LDLR,LIPE,LPL,LRP1,MDH2,N4BP1,NDUFA2,NDUFB5,NDUFS2,NDUFS7,NDUFV1,NFATC1,NFIB,NFKB1,NR1H3,OGDH,OLR1,PC,PDHB,PDK1,PDK4,PHF7,PLIN2,POU5F1,PPA1,PPARA,PPARD,PPARG,PPARGC1A,PPARGC1B,RIOK1,SDHC,SLC2A4,SOD1,…	2154 (18)
NFATC2	-1.856	transcription regulator	Inhibited	-3.144	0.000496	ABCA1,ACP3,ACP5,AXL,BCL2L1,CASP3,CASP4,CCNB1,CCNF,CD274,CDH2,CFLAR,CMPK2,COL2A1,CSF2,CTNNAL1,CXCL2,CXCL3,CXCR5,DAXX,DGKA,E2F5,EDN1,ENPP2,FAS,FOXM1,GBP4,HDAC1,HELZ2,IER3,IFIT2,IFIT3,IL12A,IL12RB2,IL15,IL18,IL1A,IL1B,IL6,IRF1,IRF7,ISG15,ISG20,ITPR1,JARID2,JUN,LMO4,MAF,MAPK3,MITF,NAA80,NFATC1,NFKB1,NFKBIA,NFKBIZ,NGFR,NMI,NR4A1,OASL,PDZD2,PLK2,PML,POU3F2,PPARG,PPARGC1A,PPP3R1,PTGS2,PTPN1,PTPRK,RAB10,…	1609 (13)
roscovitine		chemical drug	Activated	3.011	0.000505	APP,BCL2L10,BIRC5,CCN2,CCNA1,CCNB1,CCND1,CD63,CDC25A,CDK2,CDK5,CDX2,CFLAR,CHEK1,FN1,MCL1,OPRD1,PCYT1A,PDX1,PPARG,RALA,RALB,RB1,TP53,UGT1A1,ULBP2,XIAP	1989 (21)
E2F8	0.145	transcription regulator		1.076	0.000506	CCNB1,CCND1,CCNE2,CDC6,CDK1,CHEK1,E2F1,ECT2,KIF23,RACGAP1
AFAP1-AS1	-0.817	other		0.07	0.000506	AFAP1,ARHGDIA,IRF7,LASP1,PFN1,RAB10,RAB11B,RAC2,RHOA,RHOC
mir-379		microRNA		1.444	0.000506	BMP2,BMP6,CDH1,CDH2,EGFR,HIF1A,SPRY4,TP53,TXNIP,VEGFA	1378 (7)
4-octyl itaconate		chemical reagent		1.246	0.000506	GCLM,GSR,HIF1A,HMOX1,IKBKE,IL1B,ISG15,NFE2L2,NQO1,TALDO1	1272 (12)
CEBPA	0.858	transcription regulator		0.004	0.000514	ABCA3,ABCB1,ACLY,ACSL1,ADCY7,AKR1B1,AKR1C3,ALOX5AP,ANXA1,APCDD1,APLN,ARG2,ARL4C,ASL,ATF4,B9D1,BCL2A1,BIK,BIN1,C3,CCNB2,CCND1,CD14,CD19,CDH1,CEBPB,CEBPD,CFD,CKAP4,COL1A1,CPS1,CPT1A,CRABP2,CSF1,CSF1R,CTNNA1,CXCL8,CXCR4,CYCS,DGAT2,DHCR7,DHFR,DLX3,DYNLT3,E2F1,EBF1,EEF1A2,EFNB2,EMX2,EPHA7,EVPL,F8,FHL1,FLT1,FOXM1,FOXO1,G0S2,GABPA,GABPB1,GADD45A,GAL,GAPDH,GAS1,GATA2,GATA6,GBP1,GLI1,GLIPR1,GLRX,GRHL3,GSK…	2239 (19)
EZR	-1.278	other		-1.388	0.000515	ATF4,BCL2L1,BIRC5,BOP1,CDH1,CDH2,CTNNB1,EIF4EBP1,ERBB2,FAS,GEMIN5,HNRNPA2B1,IGFBP2,IL1B,IL6,MMP14,MMP2,PTGS2,RPS6KB1,SMOC2,TMEM8B,TRIB3	1112 (16)
NLRP12	-5.001	other		0.261	0.000515	AKT1,BCL3,CASP1,CREBBP,CXCL12,CXCL2,CXCL8,CXCR4,HLA-A,HLA-B,HLA-C,HLA-E,ICAM1,IL1B,IL6,JUN,MAP3K14,NOS2,NR3C1,PSMB8,TBK1,TIRAP	1824 (11)
MAPK8	-1.062	kinase		-1.453	0.00052	ABCA1,ABCB1,ACSL4,ADARB1,AKT1,ATG5,B4GALT1,B4GALT5,BBC3,BCL2L1,BIRC3,BMP2,BMP4,CASP3,CAT,CCN2,CCND1,CDH1,CDH2,CDK2,CDKN1B,CEBPB,COL1A1,CSTA,CXCL16,CXCL8,DGAT1,DUSP1,DUSP4,DUSP6,EGR1,EOMES,ETS1,FOSL1,FOSL2,FOXO1,FOXO4,FTH1,FUS,GADD45A,GCK,HIPK3,HMOX1,IL1B,IL6,JUN,KLF6,LIF,MAP3K11,MAP3K9,MIF,MMP2,MVP,NEFL,NOS2,NRP1,PLAU,PLAUR,PPARD,PPARGC1A,PPARGC1B,PTCH1,PTEN,PTGES,PTGS2,RGS4,SESN2,SOD2,TAC1,TLR2,…	1950 (14)
NTRK2	5.501	kinase		-0.968	0.00054	ABCB1,AMBN,APP,BAD,BDNF,BID,BMP2,CASP1,CCND1,CCNE2,CDC6,CDCA3,CDCA8,CDH1,CDK1,CDKN2B,DAPK1,E2F1,EGR1,FGF2,GAD1,HEY2,JAG1,MCM5,NOS2,PIK3R1,PTEN,PYCARD,RAB3A,RB1,SERTAD1,SPP1,SYP,SYT1,TP53BP2,TWIST1,VEGFA,VIM,XIAP	1902 (16)
hyaluronic acid		chemical - endogenous mammalian		-1.698	0.000544	ABCB1,BAD,BCL2L1,BCL3,BIRC5,CDKN1B,COL2A1,COL6A2,CSF1R,CTTN,CXCL2,CXCL3,CXCL8,CXCR4,EP300,ERBB2,FN1,FRK,FST,HOXD10,ICAM1,IL1B,IL6,IRAK3,IRF5,JUN,MET,MMP2,MYD88,NCF2,NFKB1,NFKBIA,NOS2,NR4A1,PDCD4,PLAU,PPARG,PTEN,PTGES,PTGS2,PTHLH,REST,RHOA,RHOC,SOCS3,SOX9,SPHK1,SPP1,TGFB1,TGFB2,TIMP1,TIMP2,TLR2,TNFAIP3,XIAP	1883 (12)
JAG1	-4.072	growth factor		-1.012	0.00055	CCND1,CDKN2B,COL1A1,DUSP1,DUSP10,DUSP5,DUSP6,DUSP8,GATA2,GLI2,HEY1,HEY2,HEYL,ITGAV,NR2F2,PTPRK,RNF128,RUNX2,SMAD3,SNAI2,SOX2,SPP1,TAGLN,TGFB1,TIMP3,TNC,TP53,VIM,WNT3,WNT4	2333 (19)
green tea polyphenol		chemical drug	Activated	2.44	0.000562	AKT1,ANXA1,CASP3,CASP8,CAV1,CDH1,HMGB1,HMOX1,ICAM1,IGFBP3,IL1B,IL6,JUN,MMP2,PIK3R1,PLAU,PPARG,PTGS2,TGFB1,TP53,VEGFA	2002 (19)
miR-483-3p (miRNAs w/seed CACUCCU)		mature microRNA		1.845	0.000566	ADIPOR2,ASH2L,BBC3,CENPF,CREBL2,CTNNB1,ECHDC3,GPSM2,IER5,LBR,MAPKAPK2,MDC1,METAP1,MKI67,PROM2,PSEN2,PUDP,RNF4,RWDD4,SLC7A1,SOCS3,TACC1,TMEM106C,TMPRSS11E,TVP23B,YAP1
KDM4C	-0.353	enzyme		-0.707	0.00061	CCNB1,CDC25A,CDC6,DHFR,FGF5,HOXA9,JPT1,KLF5,MCM3,MFN1,MIS18BP1,MSH2,PIM3,PITX2,POLA1,POU5F1,RBL1,SKA1,SOX2,WNT3	1163 (7)
VTN	2.634	other		-1.636	0.00061	BCL2L1,BHLHE40,COL1A1,CXCL3,EFNB2,F3,IL1B,IRF9,IRS1,ITGA4,ITGA5,ITGAV,ITGB1,MMP2,PLAU,PLAUR,PTGS2,PXN,RUNX2,S100A10	2110 (17)
IL3		cytokine	Inhibited	-4.206	0.000613	ACOX1,ADA,ADGRE5,ALOX5AP,AREG,ARHGAP29,ARHGDIB,ARHGEF1,ATF5,BCL2L1,BIRC3,BMP2,CALR,CAMKK2,CAPZB,CASP3,CAT,CBFB,CCND1,CCND3,CCNG1,CD14,CD63,CDKN1B,CIAPIN1,CLEC11A,COPS4,CPT1A,CRAT,CSF1,CSF1R,CSF2,CSNK1A1,CTTN,CXCL8,CXCR4,EGR1,EIF2AK2,EIF3G,ELK4,FAS,FGFR1,FGFR4,FKBP3,FOSL2,FOXD3,FUS,GADD45A,GADD45B,GART,GATA2,GNA13,GNAO1,HBEGF,HK1,HK2,HLA-A,HNRNPA2B1,HRK,HSP90B1,HSPA5,ICAM1,IL1B,IL1RL1,IL6,IMPDH2,I…	2049 (17)
UCHL1	-0.638	peptidase		-0.421	0.000616	ADCY9,ANXA6,ATP5F1B,BCL2L1,CGAS,CPD,EIF2B4,EIF3M,GABPB1,GOLM1,HDAC9,HERC6,HOXD9,ITPRIP,KLHL23/PHOSPHO2-KLHL23,LBH,LDLR,LPP,MAPK6,PDIA2,PHF20,PI4K2B,PLA2G4A,PRSS23,PSME1,PURG,RBM26,RHOF,RPS6,SCP2,SH2D4A,SH3D19,SMPDL3B,SOD2,STXBP4,TP53,UBA7,ZC4H2	1376 (7)
PAX7	6.174	transcription regulator		-0.801	0.000616	ABCA1,AHR,ATP11A,CDH2,CNTFR,CXCR4,DEPTOR,DHX40,EMB,F2RL1,FRK,GALNT13,GBX1,HMGN1,ID3,IL13RA1,LRPAP1,MDFIC,MEST,MSLN,MYO1D,NPNT,NQO1,OTUD7A,PARM1,PDLIM4,PLAGL1,PPARG,PRRX1,PRSS23,PTGR1,RAD23B,RASA3,RNF128,SEMA3E,SLC44A1,SYNE2,ZNF407
tyrphostin AG 1478		chemical - kinase inhibitor	Activated	3.381	0.000616	AKT1,AREG,BCL2L1,BTC,CAV1,CCND1,CDKN1B,COL8A1,CSF2,CXCL8,CXCR4,EDN1,EGFR,F3,FBN1,GFPT1,HAS2,HBEGF,HIF1A,ICAM1,IGF1R,IL6,ITGA2,MCL1,MME,MMP2,NCF2,PLAGL1,PLAU,PTGS2,PTTG1,RUNX1,RUNX2,S100A10,SLC2A1,SPHK1,TFPI2,TWIST1	1951 (15)
ARNT	0.857	transcription regulator	Inhibited	-3.796	0.000624	ADAM17,ADM,AHR,AKT2,ALDH7A1,ANGPTL4,AREG,ATP5MC1,BHLHE40,BHLHE41,CA9,CAV1,CD81,CLDN1,CTSD,CXCR4,CYP1B1,CYP2S1,DEGS1,DNAJC2,EDN1,EIF6,ENG,EPAS1,ERO1A,ESRRG,FLT1,FURIN,G6PD,GAPDH,GAS1,HES6,HIF1A,HK2,INSR,IRS2,ITGAV,KIF20A,LOXL2,MYL6,MYO1C,NDUFS2,NDUFS4,NQO1,PGM2,PPP2CB,RANBP1,RANGAP1,SIM1,SLC2A1,SOCS3,TFRC,TP53,TUBA4A,UBE2C,UGT1A6,VEGFA,VIM	2400 (20)
EED	-0.386	transcription regulator		-1.127	0.000633	BBOX1,BDNF,CDKN1B,CDX2,DAB2IP,EGFR,FGF5,FOXA1,GATA4,GATA6,GDNF,HOXB13,HOXC12,IGFBP2,MMP2,MYT1,NKD1,OLIG1,OLIG2,PAX3,PPP2R2B,PTGS2,RUNX2,SLC26A6,TBX3	2230 (22)
mocetinostat		chemical drug		1.686	0.00064	BDNF,BEST1,CASP3,DISC1,HDAC7,IL1B,MAGEA3/MAGEA6,MCL1,NOVA1,TP53,UNC5C
mir-322		microRNA		1.586	0.00064	CDC25A,CDH2,FGF2,FGFR1,FN1,IGF1R,LYPLA2,MAP2K1,SMAD7,SMURF2,VIM
rifampin		chemical drug		-0.765	0.000654	ABCB1,ABCB10,ABCB4,ABCC1,ABCC3,ABHD2,AGTR1,ARHGEF19,ATP2B1,AXIN2,BMP1,CARS1,CCDC74B,CCNJ,CD14,CD24,CD59,CDCA7L,CEP135,CEP70,CFL1,COL6A1,CSF1,CTNNAL1,CYP24A1,DSE,ECT2,EEF1AKMT2,ELAVL1,ENPP2,EPHA1,FGGY,GATA6,GBP2,GPRC5B,GRK3,GSTP1,HUNK,IFRD1,IL1B,KIF14,LAMA3,MATN2,ME1,MME,NAGK,NCAPH,NEIL3,NOS2,NUF2,OSBP2,PFAS,PLEC,PYROXD1,RACGAP1,SERPINB1,SLC39A10,SPOCD1,SPP1,STIL,STYX,TESMIN,TGIF2,TLR2,TMPRSS4,TSK…	958 (11)
LLGL2	-1.609	other	Inhibited	-3.441	0.000658	AMOTL2,ANKRD1,AXL,CCN1,CCN2,CRIM1,DUSP1,ETV5,GAS6,HEXB,SGK1,SH2D4A,SHCBP1,SLIT2,STMN1,TGFB2,TNS1,TOP2A,TSPAN3
NCOA4	-0.644	transcription regulator	Activated	2.426	0.000658	AKR1B1,ALDH7A1,CCN2,CDH1,CLDN7,FABP5,FGFR3,FYN,GAD1,GATA4,HOXA9,HOXD13,JAG1,MME,NR3C1,PLTP,POU4F1,ST14,ST3GAL6	2408 (11)
dithiothreitol		chemical reagent		-1.807	0.000658	ATP2A2,BOK,CCND1,DFFB,ERBB2,ERO1B,GADD45A,HIF1A,HMOX1,HSP90B1,HSPA5,LMAN1,PHLDA1,SEL1L,TLR2,TOR1A,UBE3A,UBXN4,VEGFA	1864 (19)
IRAK4	-1.049	kinase	Inhibited	-3.057	0.000664	APP,BIRC3,CXCL16,CXCL2,CXCL3,CXCL8,EDN1,EGR1,ERRFI1,IDE,IER2,IFNGR1,IFRD1,IL12A,IL1B,IL23A,IL6,IRAK1,IRF1,IRF3,IRF5,IRF7,JUN,LIF,MAP3K8,NFKBIA,NFKBIZ,NLRP3,NOCT,NOS2,NR4A1,OLR1,PHLDA1,PLSCR1,PPARG,RASA2,TATDN3,TNFAIP3,ZC3H12A,ZFP36	1770 (12)
mir-210	1.925	microRNA		1.264	0.000669	ABCC3,ALDH5A1,BDNF,CCN2,CDCA7L,CDH1,CDH2,CHD9,CLASP2,COL4A2,CXCL12,DCBLD1,DHFR,E2F3,EFNA3,EHD2,ELK3,EPHA3,FAM102A,FAM3C,FKBP9,GDE1,GPD1L,HOXA9,ISCU,KCMF1,KLF6,LASP1,MACROH2A1,MIB1,NCAM1,NDUFA4,NPTX1,NUP210,P4HB,PSAP,PTPN1,SCARA3,SDF2,SERTAD2,SETD2,SH3BGRL,SIPA1L3,SMCHD1,STAT6,STMN1,TP53I11
mir-10	6.414	microRNA		1.428	0.000699	ABCC4,ALDH1A3,APC2,BAK1,BCL2L1,BCL2L2,BMPR2,CCN1,CDH1,CTDSPL,CXCL11,DGAT1,E2F1,EPHB2,ERBB2,ERBB3,FGFR3,FKBP5,FOXA1,FZD5,FZD8,GLI1,GTPBP2,HIF1A,HOXD10,IGF1R,IL6,ITCH,KLF13,LIFR,MAF,MAP3K7,MCL1,MYD88,NF1,PPP1CA,PPP2CA,PRDM1,PTEN,RB1,RPS6KA1,SGPL1,SLC1A5,SMAD2,SMG1,SMO,SRSF1,TBC1D1,TP53,VEGFA,WT1	2447 (19)
TRPS1	0.521	transcription regulator		1.175	0.000703	ACSL1,ALPL,BMP2,CCNB2,CDK1,CENPF,DKK1,ENPP1,FN1,FOXM1,GALNT3,GREB1,MMP2,NOTCH2,PHEX,PHOSPHO1,PTTG1,RAMP1,RUNX1,RUNX2,SEMA6A,SNAI2,SOX2,TGFB2,TOP2A,TPX2,VDR,ZEB1	2019 (13)
RUVBL1	0.64	transcription regulator		0.962	0.000707	ADAM15,AXIN2,CARS1,CHKB-DT,CYP4F3,ETS1,GADD45B,H2BC12,IGFBP3,KDM4B,KIFC2,MCM3,MNX1,NUCKS1,PLAC8,QKI,RBL1,SESN2,SOCS3,SRD5A1,TCF4,TMEM19,TRIM66,ZDBF2	431 (6)
MESP1	0.622	transcription regulator	Activated	2.887	0.00073	FOXC1,FOXC2,GATA4,HAND2,MEF2C,MEIS2,NKX2-5,PRICKLE1,SNAI2,TWIST1,ZEB1,ZEB2
MIR101		group		1.793	0.00073	BMI1,CDH5,DNMT3B,DUSP1,MCL1,MET,MITF,OGT,PTGS2,RNF2,STMN1,SUZ12	1071 (7)
mir-194		microRNA		0.862	0.00073	CUL4B,DACH1,E2F1,FZD6,GYG1,PLAUR,RAC1,RAP2B,SETD5,SLC7A5,SOCS2,TP53	805 (7)
S-nitroso-N-acetyl-DL-penicillamine		chemical reagent	Inhibited	-2.026	0.000731	ADM,BIRC5,CCNB1,CXCL12,CXCL8,ETV4,FAS,HIF1A,HMOX1,HSPA1A/HSPA1B,IL18,LDLR,MARCKSL1,MSH6,MST1R,NOS2,NPR2,NSF,PMAIP1,PPARD,PPARGC1A,PRDM1,PRKG1,PTGS2,S100A10,SPP1,TGFB1,TIMP1,TP53,TP73,VEGFA	2013 (17)
SPP1	-5.287	cytokine	Inhibited	-2.142	0.000736	AKT1,AURKA,BAD,BCL2L1,CAPNS1,CASP8,CD9,CDC25A,CDH1,CDH2,CDK2,COL1A1,CXCL1,CXCL12,CXCL2,CXCL3,CXCL8,DHCR7,DSP,E2F1,EGFR,EPDR1,ERBB2,ETS2,FN1,GSTZ1,HAS2,HMOX1,HOMER2,ICAM1,IL1A,IL1B,IL6,INSIG1,ITGA2,ITGA3,ITGAV,ITGB5,JAG1,KRT18,LIF,LOX,MECR,MMP14,MMP2,NDUFS4,NDUFS7,NDUFS8,NDUFV1,NOS2,NOTCH1,NRCAM,OCLN,PDGFA,PGD,PIK3R1,PLAU,PPARG,PTGS2,RAF1,RB1,RUNX2,S100A4,SAMM50,SELENOW,SEMA6C,SLC35C2,SLIT1,SNAI2,…	1950 (15)
CDX2	9.5	transcription regulator	Activated	4.617	0.000741	ABCB1,ABCB10,AXIN2,BBOX1,BIRC5,CAV1,CCK,CD9,CDH1,CDKN2D,CDX2,CLDN1,CTSE,CYP26A1,ETS1,EZR,FOXQ1,FXYD3,GLI2,HNF1B,HOXA11,HOXA13,HOXA5,HOXA7,HOXA9,HOXB2,HOXB5,HOXB7,HOXB8,HOXB9,HOXC10,HOXC6,HOXC8,HOXD1,HOXD11,HOXD13,HOXD3,HOXD4,HOXD8,JUN,KCNJ15,KLF5,KRT23,LAMP1,LAMP2,LEF1,LGALS8,MARK2,MLLT3,MUC4,NR2F2,NTS,PAX3,POU5F1,PRDM1,PTEN,RAB8A,SH3PXD2A,SLC26A6,SLC7A8,SOX2,SOX5,SOX9,SYNPO,TAC1,TAL1,TGFB1,WNT3A	2403 (20)
PSMD10	1.111	transcription regulator		-0.577	0.000744	AKT1,CCND1,CDH1,CDK2,CDKN1B,CXCL1,CXCL8,EIF4EBP1,HIF1A,ICAM1,IKBKB,IL6,MRAS,PIK3CA,PTEN,TP53,TWIST1	1968 (19)
CD38	0.588	enzyme		-0.828	0.000774	AK3,ANXA2,ANXA6,ATP1B1,CKAP4,CLCN3,COL1A1,CRELD2,DENND11,EGLN1,EGLN3,EIF4EBP1,ELL2,EPS8,ERO1A,FN1,GALK1,GBE1,GBP2,GBP4,GCAT,GLIPR2,GPAM,GSTT2/GSTT2B,HIGD1A,ICAM1,IL6,KLHDC2,LFNG,LGALS3,LMO7,MANF,MKRN3,MYADM,NABP1,NCAM1,NDUFV3,NT5E,PDCD2,PDK1,PDLIM1,PFKP,PGM1,PIM1,PKM,PPARGC1A,PPP3CA,PRDM1,PRDX4,PSAT1,PYCR1,RASGRP2,RBPMS,RPN1,RRAS2,S100A4,SCEL,SDC1,SDF2L1,SEMA4A,SKA1,SLAIN1,SLC2A1,SLC7A5,SOCS2,SOC…	1713 (19)
Ikb		group		-1.519	0.000777	BCL2L1,CCNB1,CCND1,CXCL2,HHEX,HSPA5,ICAM1,IL6,KRT6B,NFKB1,NR4A1,PTEN,PTGS2,TNFAIP3,TP73,UACA	1886 (13)
IPMK	0.171	kinase	Inhibited	-2.287	0.000777	ABHD12,ACTB,CAPNS1,CCN1,CSRP1,FLNA,FLNC,JUN,JUNB,MYL6,MYL9,PDLIM5,PER1,PFN1,PMP22,TAGLN2	1072 (13)
SAFB2	0.798	other	Activated	2	0.000777	B2M,BBC3,CHD3,EIF4B,HLA-C,HLA-E,JUN,MAP3K11,MLLT3,PFDN4,PPP1R12A,PSMB9,RBM8A,SAFB2,UBE2B,UQCRC2
Ctbp		group		-1.278	0.000782	ADRB2,AP1S1,CDH1,DKK1,DSG2,GADD45A,HEY1,JUP,PERP,PLAUR,RAB29,SIRT1,STAP2	1891 (12)
AURKA	-1.343	kinase		0.566	0.000782	BBC3,BCL2L1,CDH1,CTNNB1,FOXM1,MMP2,PMAIP1,PTEN,SOX2,TERT,TP53,TP73,XIST	2081 (18)
PARP9	-9.33	enzyme	Inhibited	-2.906	0.000782	HLA-E,IFI44,IFIT1,IFIT2,IFIT3,IRF1,IRF2,IRF7,ISG15,OAS2,RBMS1,SP110,STAT1	628 (7)
Immunoglobulin		complex		0.959	0.000786	ACLY,ACO2,ACSL1,ADAM19,ADIPOR1,ADM,AKT1,ALKBH5,APLN,APOL2,APP,ARC,AREG,ARRDC2,ATP5F1B,ATP5F1D,ATP5MC3,ATP5PF,BAD,BATF3,BCL10,BCL2A1,BCL2L1,BCL3,BDNF,BIRC3,BIRC5,BMP4,BPGM,CALR,CAPG,CASP1,CASP4,CBS/CBSL,CCND3,CD14,CD164,CD274,CD63,CD8A,CDH1,CDH2,CDK2,CDK6,CDKN1B,CEBPD,CFD,CHST2,CORO2A,COX11,COX6B2,CSF1,CSF1R,CSF2,CTBS,CTH,CTNNB1,CTSA,CTSH,CTSZ,CXCL1,CXCL11,CXCL12,CXCL16,CXCL2,CXCL3,CXCL8,CXCR4,CXC…	2183 (15)
NSUN6	1.249	enzyme	Inhibited	-3.545	0.000787	AMOTL2,AXL,CCN1,CCN2,CRIM1,DDAH1,ETV5,FGF2,FLNA,GAS6,HEXB,MARCKS,PHGDH,PMP22,SCHIP1,SGK1,STMN1,TGFB2,TGM2,TK1,TNS1,TOP2A,TSPAN3
discodermolide		chemical drug			0.000787	BLM,BRCA2,CCNB1,CCNB2,CDC25A,CDC7,CDK1,CDK2,CHEK1,E2F2,EIF4EBP1,ESPL1,FANCD2,GADD45A,KIF23,PKMYT1,PLK1,PTTG1,RBL1,RFC3,TOP2A,TP53,WEE1	1634 (7)
IRF2	-4.22	transcription regulator	Inhibited	-2.114	0.000796	ARCN1,B2M,C1S,CASP1,CCND1,CD14,CDK2,CDKN1B,CEACAM1,CLIC1,CTSS,DST,DUSP5,E2F3,EIF2AK2,ERAP1,FAM111A,FGB,GBP1,HK2,HLA-B,ID1,IFI35,IL12A,IL12RB2,IL1B,IL6,IL6ST,IL7,IRF1,IRF7,IRF8,ISG15,MAPK6,MYH9,NOS2,OAS1,OPN3,PFKFB3,PSMB10,PSMB8,PSMB9,PSME1,PSME2,PTGR1,PTGS2,RNF20,RRBP1,S100P,SDC1,SLC7A1,SRXN1,SUPT16H,TAP1,TAP2,TAPBP,TLR3,TPM1,TRIM21,UBE2L6	1962 (19)
miR-218-5p (and other miRNAs w/seed UGUGCUU)		mature microRNA		0.937	0.000799	BMI1,CASP3,CDH1,COL1A1,EGFR,ONECUT2,PARP1,PIK3C2A,RICTOR,RUNX2,SNAI2,TGM2,VIM,VOPP1,ZEB2	582 (7)
PBX3	-0.39	transcription regulator		0.513	0.000799	ASH2L,BAZ2B,CHD9,DCUN1D1,ERBIN,EYA1,HOXA10,HOXA5,HOXA6,HOXA7,HOXA9,IKZF2,RNF220,RUNX2,TSC22D2
LILRB1	2.298	transmembrane receptor		0.973	0.000799	ADM,CAV1,CXCL8,DEPTOR,FGFR3,HSPB1,ITGB1,MAF,MMP2,PRDM1,RECK,SDC1,ST3GAL6,TENT5C,UCHL1	811 (7)
SAV1	0.246	other		0.302	0.000802	BIRC5,CCN2,CCND1,COL1A1,COL3A1,COL4A1,CSF2,CXCL2,FN1,GPC3,IL6,PITX2,SPP1,VIM	1069 (7)
ERVW-1	-0.482	other		0.19	0.000802	CDCA8,CNP,CREB3L1,CXCL1,CXCL8,HSPA5,IL6,LATS2,MICA,NOS2,SLC1A4,TP53,ULBP2,XBP1	1907 (11)
sulfasalazine		chemical drug	Activated	2.967	0.000802	AIFM1,ALOX5AP,BCL2L1,CCND1,CXCL8,ICAM1,IER3,IL15,IL1B,MICA,NFKBIA,NR3C1,TPM3,TYMP	1572 (12)
mir-133		microRNA		0.676	0.000803	AK2,ARFIP2,ARHGDIA,BCL2L2,BTBD3,CCN2,CCNB1,CDCA8,CORO1C,CTBP2,CXCL3,ELAVL1,FBN2,FN1,FTL,GSTP1,HAND2,HCN2,IGF1R,KCNH2,KLF15,LASP1,LPGAT1,MET,MMP14,MSN,NELFA,PPARG,QKI,RHOA,SLC2A4,TAGLN,TBL1X,TPM4,VCAN,YES1	1068 (15)
black raspberry extract		chemical drug			0.000809	ACTN4,ADAMTS6,AHNAK,ANXA2,AOX1,ARPC2,ATP6V0E1,BLOC1S4,CACNA1B,CASD1,CCNC,CDYL,CLDN1,CTTN,DSC3,DUSP5,FGFBP1,FST,GATD3A/GATD3B,GNG12,GOLGA7,HIP1,HMOX1,KLF10,KLF5,LAMP2,LEPR,MCL1,MSN,MYO10,NDEL1,PCSK9,PDCD10,PHGDH,PLK3,PLS3,PPP2R2A,PPP3CA,PRKAR1A,RAB1A,RAD23B,RBBP6,RGS17,SCEL,SDC1,SLC30A1,SPSB3,TGFA,TUBB6,TXNL1,UBE2C,UBE3D,UBXN4,USP14
JUNB	-3.096	transcription regulator	Inhibited	-3.755	0.000819	ACLY,AGTR1,ARNTL2,BCL3,BDNF,C3,CASP4,CAV1,CCND1,CD274,CD82,CDKN1B,CFD,CFLAR,COL1A1,COL7A1,CSF2,CXCL16,CXCL2,CXCL3,CYP1B1,DUSP1,E2F7,EEF2,EPAS1,FBLN2,FBLN5,FN1,FOSL1,FTH1,HK2,HMOX1,IKZF2,IL1B,IL1RL1,IL6,ITGAV,JUNB,LIPE,LPAR1,MIXL1,MMP2,MYL12A,NCF2,NFKB2,PAK3,PIM1,PLAU,PLAUR,PNPLA2,PPP2R2A,PTBP2,RELB,RUNX2,SERP1,SERPINB2,SGK1,SLC7A1,SLC8A1,SNAI2,SYT1,TBX3,TIMP1,TIMP3,TNFRSF8,VAMP8,VEGFC,XBP1,YWHAG	2146 (16)
Ins1		other		-1.034	0.000861	ACADM,ACTB,ADIPOR1,ADIPOR2,AKT1,ANGPTL4,AP2M1,APLN,ARF1,BAD,BDH1,BDNF,BPGM,CCK,CCND1,CCND3,CDK2,CDKN1B,CEBPB,CEBPD,CFD,COL18A1,COL1A1,CRAT,CREB1,DGAT2,DHFR,DLX5,ECI1,ECI2,EDN1,EGR1,EIF4EBP1,ERCC1,ERRFI1,FDFT1,FGF2,FOXA1,FOXC2,FOXE1,G6PD,GAPDH,GCK,GNPAT,GPLD1,GREB1,GSTP1,HK2,IDE,IGF1R,IGFBP2,IGFBP3,IGFBP4,IGFBP5,IL1B,IL6,IL6ST,IMPDH2,INSR,IRS1,IRS2,ITCH,ITGA6,JUN,JUNB,LDLR,LGALS3BP,LIFR,LIPE,LPL,L…	2122 (17)
phytohemagglutinin		chemical drug		-1.776	0.00087	ACOX1,AFF1,AKT2,ANOS1,APP,BCHE,BCL3,BCR,CACNB2,CACNB3,CALU,CASP3,CAT,CCND3,CD46,CD47,CDK7,CDK8,CHAF1B,CHML,CHN1,CLCN4,COL18A1,COL4A5,COX7B,CPM,CPS1,CRMP1,CSF1,CUX1,CXCL12,CXCL8,CXCR4,DHX34,DHX9,DNAJB2,DRG2,ENG,ENPEP,EPRS1,FAS,FBN1,FGFR3,FKBP9,FOSL2,GABRB3,GATA2,GNAI1,GPD2,GPLD1,GUCY1B1,HCFC1,HPCA,ICAM1,IKZF3,IL12RB2,IL15RA,IL1B,IL24,IL6,IL7R,INPP1,ITGA8,JAK2,KCNN2,KCNN4,KIF23,KIT,LAMP1,LCAT,LMAN1…	1796 (14)
R5020		chemical reagent	Inhibited	-2.713	0.000872	ABCC8,AMOT,AREG,BCL2L1,BIRC3,CCN2,CCND1,CEBPB,CTSD,DKK1,DUSP4,DUSP5,E2F1,EGFR,ERBB2,ERBB3,F3,FKBP5,GAL,HBEGF,IER3,IFIT3,IFIT5,IL1R1,IRS2,LGALS3BP,MT2A,NAGA,NET1,NFKBIA,NR3C2,PDK4,PIM2,RARG,SAA1,SGK1,STAT1,STAT3,STAT5A,TIMP2,TIPARP,TK1,TXNIP,VIPR1,ZBTB16	1650 (17)
HDL-cholesterol		complex		-0.124	0.000874	ALDH1L2,CEBPB,CHAC1,DDR2,DEPTOR,DHCR7,DUSP15,EGR1,EIF2S2,EIF4EBP1,FDFT1,FOSL2,GPC6,GPT2,HNRNPD,IDI1,MSMO1,NUDT7,SLC30A1,SQLE,TRIB3,TRIM66
KDM3A	0.343	transcription regulator	Inhibited	-3.838	0.000874	ADM,AJUBA,ALCAM,ARHGEF28,CCN1,CCN2,CCND1,CD9,CHRNB1,EDN1,ETS1,FLNC,FSTL3,GDF15,GNG2,HMOX1,KLF5,LOXL2,MCAM,PLOD2,TAGLN,TNC	818 (7)
NDRG1	-0.1	kinase		-0.958	0.000874	CASP3,CASP4,CAV1,CCND1,CD82,CDH1,CTNNB1,CXCL1,CXCL2,CXCL3,CXCL8,IL1A,JUN,PARP1,PML,SMAD2,SMAD3,SNAI2,TP53,VEGFA,VIM,ZEB1	2236 (20)
EGR3	3.578	transcription regulator		-0.992	0.000895	APBB1,BCL2L1,BHLHE40,EFNB1,ESD,GDNF,GINS2,ID3,IRAK1,JUN,LMO7,LTBP3,MXRA8,NAB2,NF1,NGFR,NOTCH1,PABPC1L,PDE3A,PLXND1,PTPN11,RORA,SLIT2,SOCS3,SOX9,ZEB2	1829 (13)
IFNAR2		transmembrane receptor	Inhibited	-3.031	0.000895	CXCL11,DDX58,GBP4,HERC5,HSH2D,IFI44,IFI6,IFIH1,IFITM1,IL18,IL6,ISG15,LAMP3,MX2,OAS1,OAS2,PSMB10,PSMB8,PSMB9,PSME2,TGM2,TLR3,TRIM22,UBA7,UBE2L6,XAF1	1613 (14)
ZFAS1	-1.526	other		-0.393	0.000909	CDH1,CDH2,MMP14,MMP16,NKD2,VIM,ZEB1,ZEB2
GLRX	-1.081	enzyme		0.863	0.000909	CXCL2,CXCL3,FGF2,HIF1A,ICAM1,PDGFA,PDGFB,VEGFA	1323 (14)
PSMB9	-6.036	peptidase		-1.309	0.000909	HLA-A,NFKB1,NFKB2,NFKBIA,RELB,RPS3,TAP1,TNFAIP3	1612 (12)
sulindac sulfone		chemical - endogenous mammalian		-1.348	0.000909	CTNNB1,GATA6,IL24,NQO1,PRKG1,PTGES,SAT1,YWHAE	744 (7)
RBL2	0.022	other		0.193	0.000909	AURKA,CAMKK2,CASP4,CASP6,CCNB1,CCNB2,CCND1,CCNF,CDC25A,CDC6,CDK1,CDKN1B,CDR2,CDX2,CHKA,DHFR,DUSP10,E2F1,FAS,GRK6,GSK3B,HCFC1,KIFC1,KLF10,MAGEA3/MAGEA6,MAP3K14,MARK2,NPAT,PA2G4,PCSK7,PFAS,PIM1,PLK1,POLD1,PPP1R8,PSMB2,RAF1,RANBP1,RB1,RBL1,RRM2,STMN1,TERT,TP73,UCK2,VEGFA,VEGFB,XPC,ZEB1	2130 (17)
HMGA1	-0.761	transcription regulator		0.074	0.000927	ALPL,ARL4A,B2M,CAV1,CAV2,CCN1,CCND1,CD19,CITED1,COL1A1,COL4A1,COL4A2,CTSC,CTSH,DHCR7,DPYSL4,EGR1,FOSL2,GHR,GNA15,GSN,HAND1,HS3ST1,ID3,IDI1,IER2,IER3,IGFBP3,IGFBP4,IGFBP7,IL15,IL6,INSIG1,INSR,JUNB,KCNJ11,KIT,KRT10,LAMA1,LAMB1,LIPE,MAPKAPK2,MAPT,MGAT1,MVK,NECTIN1,NF2,NKX2-5,NOS2,PHLDA2,PIM2,PPARG,PSEN2,PTGS2,PYCR2,RHOB,RPL7A,SDC4,SERPINH1,SHC3,SPARC,STAT3,SYK,TAGLN,TFAP2C,TRIM28,TWIST1,ZYX	2570 (22)
RNF2	0.942	transcription regulator		-1.038	0.000945	ALX1,CBX4,CDC14A,CDIP1,CDKN1B,CDX2,CLVS2,EOMES,GATA4,GATA6,GDF15,HAND1,HEY2,HOXA10,HOXA5,HOXA7,HOXB3,HOXB6,HOXB8,HOXC6,MCC,MCM3,MSX1,NKX2-2,PAX3,PCGF2,POU5F1,REC8,SERPINA1,SOX7,TP53,ZNF318	251 (4)
SETD2	1	enzyme		-0.655	0.000968	CAV1,CCN1,CCN2,CDH2,ENG,FLT1,GNA13,HHEX,IGF1R,JUN,LAMA1,LAMA4,MEF2C,PDGFC,PTEN,QKI,RHOB,RTN4,SEMA3C,VEGFB,WNT5A	1159 (7)
FUS-DDIT3		fusion gene/product		1.291	0.000968	AMIGO2,CAMK2N1,CCN2,COL4A1,CXCL8,EFEMP1,FLT1,FN1,GPC6,IGFBP6,IL1B,IL24,IL6,LOX,NPAS2,PALLD,PLEC,RGS4,SERPINB2,TSC22D3,VIM	849 (7)
PPARGC1B	2.208	transcription regulator		1.689	0.00099	ABCA1,ACACB,ACADL,ACADM,ACADVL,ATP5F1B,C3,CCND1,CDK12,CKB,COX5A,CYCS,DGAT1,EGLN3,ERBB2,ERO1A,ESRRA,ESRRG,FBXO32,FDFT1,FDPS,GCK,GGPS1,GPAM,GRB7,HK2,LSS,MITF,MVK,PDK4,PGAP3,PHOSPHO1,PPARGC1B,RUNX2,SLC2A4,SQLE,VEGFA	2058 (14)
ATM	-0.342	kinase	Inhibited	-2.702	0.00099	ACTB,ATR,BBC3,BCL2L1,BIRC2,BLM,CCN2,CCND1,CDKN1B,CDKN2D,CFLAR,CHEK1,CHEK2,CXCL8,DUSP1,DUSP10,FAS,FN1,GADD45A,GADD45B,H2AX,HMOX1,IGF1R,IL6,IRF1,JUN,MICA,MICB,PPP2R2C,PPP2R5D,PSMC4,PSME2,RRM1,RRM2,TGM2,TNFAIP3,TP53	1085 (14)
EBF1	7.406	transcription regulator		-1.336	0.000995	ACACB,ADCY3,AKT2,AKT3,CBLC,CD19,CDH8,CEBPB,COL1A1,CXCL12,DLX5,EBF1,EIF4EBP1,FLOT2,FOXO1,GSK3B,HK2,IKBKB,IL6,INPP5D,INSR,IRF1,IRF7,IRS1,KRAS,LEF1,LIPE,LNPEP,MAP2K1,MAPK1,MAPK8,MKNK1,MYD88,PDE3B,PFKP,PHKA1,PIK3CA,PIK3R1,PPARG,PPARGC1A,PPP1CA,PPP1CB,PPP1R3D,PRDM1,PRKAA1,PRKAA2,PRKAG2,PRKAR1A,PRKAR2A,PRKAR2B,PTPN1,PTPRF,PYGB,RAF1,RHOQ,RPS6KB1,SLC2A4,SOCS3,SOS2,STAT1,TLR2,TLR3	1976 (23)
bleomycin		chemical drug	Inhibited	-4.361	0.001	AKT1,BCL2L1,BLM,BMP1,BMP4,C3,CAMK2B,CASP3,CCN2,CDC25B,CDKN1B,COL1A1,COL3A1,CTNNB1,CTSD,CTSE,CTSS,CXCL1,CXCL12,CXCL2,CXCR4,E2F7,EGFR,FAS,FGFR1,FN1,FOSL1,FZD6,H2AX,HBEGF,HEY1,HIF1A,ICAM1,ID1,IL13RA1,IL18,IL1A,IL1B,IL4R,IL6,IRAK1,ITGA1,ITGB1,JAG1,KLF15,LAMA1,LGALS3,LOX,LTBP1,LTBP2,MAP3K6,MAP4,MAPKAPK2,MIF,MMP14,MMP2,MSN,NDN,NOS2,NR4A1,PPARGC1A,PRPF19,PTEN,PTTG1,RGCC,S100A4,SDC4,SOCS2,SPHK1,SPP1,STAT…	2297 (17)
COMMD3-BMI1		transcription regulator		-1.698	0.00101	CDKN2B,CDKN2D,EBF1,FOXA1,HOXA10,HOXA13,HOXA5,HOXA6,HOXA7,HOXA9,HOXB3,HOXB5,HOXB6,HOXB7,HOXB9,HOXC4,HOXC6,HOXC8,HOXC9,IGF2BP3,IL6,LEF1,PRKCA,ROR2,WNT5A
HBEGF	-3.047	growth factor	Inhibited	-3.136	0.00101	ANGPTL4,ANKRD37,BHLHE40,BMP2,CCND1,CDH1,CSF1R,CXCR4,EGFR,EGR1,FGF2,HK2,IGFBP3,ITGB1,MAPK1,MAPK14,NOS2,NRP1,PDK4,PKM,PTGS2,REST,TGFA,VEGFA,ZEB1	2382 (18)
CITED2	0.431	transcription regulator	Activated	2.393	0.00101	ACOX1,ADM,ANGPTL4,CDKN2B,CDX2,CXCL1,CXCL8,DUSP1,EGLN3,FGF5,FOXC2,GATA6,HIF1A,IL1A,IL1B,IL6,LPL,NOS2,PCGF2,PITX2,POU5F1,SLC1A3,TGM2,TNFAIP3,VEGFA	1922 (18)
NME1	0.456	kinase	Activated	2.743	0.00101	BOP1,CCN2,CCND1,CSTF1,CTSD,EXOSC8,FBL,GEMIN5,HNRNPA2B1,ICMT,LPAR1,MET,MMP14,MMP2,NETO2,NOP58,PA2G4,PABPC1,PTGS2,RAC1,SF3A1,SMAD7,SMO,TIMP1,TP53	1215 (15)
CALCA		other		-0.177	0.00102	AHNAK,ANK3,ARFGEF2,CALCB,CARD14,CGNL1,COL3A1,CTNNB1,CXCL8,CXCR4,CYP24A1,DISC1,EDN1,EIF4B,FLT1,GNG12,GOLGB1,IL6,JUNB,KIF26A,LIMA1,LMNA,MAX,MKI67,MME,MTFR1L,NOS2,PALM,PHLDB2,PLXDC2,PPP1R1A,PPP2R5D,PRIMA1,PUM1,PXN,RAB7A,RBM14,RMDN3,RUNX2,SLC2A4,SLC43A2,SLC9A3,SNX3,SORT1,ST14,TNS1	2471 (19)
PARP1	2.548	enzyme	Inhibited	-2.275	0.00103	ABCA1,ATXN10,BRCA2,CASP4,CCND1,CD274,CDH1,COL3A1,CSF2,CXCL1,CXCL12,CXCL2,CXCL3,DNAJC12,E2F1,ECE1,EGFR,ERBB2,FAS,FKBP5,GBP2,GBP4,GBP6,GDF15,HAS2,HMOX1,HRH1,ICAM1,IL1B,IL6,ITPR1,JUN,KRAS,LGALS3BP,LIF,MITF,MMP2,NELL2,NOS2,NVL,PARP1,PEG10,POLA1,PTGS2,RAPGEF4,RB1,SDK1,SH3BP2,SLC38A2,SOCS2,STAT1,TGFA,TIMP2,TLR1,TMOD3,TMSB15A,TP53,VEGFC	1516 (14)
NRG2	3.027	growth factor			0.00105	BAK1,BIN1,CAPN1,CASP3,CCN1,CCN2,CCND3,DNAJB2,E2F1,EDN1,EGFR,EGR1,ELOA,ERBB2,GAD1,GRIN2C,HK2,HMOX1,HOXD3,IER2,IER3,IRF3,ITGB5,JUNB,LIFR,MCL1,NR4A1,NR4A3,PAFAH1B1,PDGFA,SOX2,TNFRSF25,TOB2,VEGFA	2316 (22)
uranyl nitrate		chemical toxicant		-0.966	0.00105	ACADS,ATP5F1B,ATP5IF1,CANX,CIDEB,CLTRN,CRYZ,CSRP1,CST3,CYCS,EEF2,ESD,FAU,FKBP3,FTL,GAS6,GATD3A/GATD3B,GHR,GLUD1,GPX3,HNRNPA2B1,HSPA8,HSPD1,IFIT3,IGFBP7,LAMP2,LGALS3,MYD88,NDUFA1,PDHA1,PEBP1,PIM3,PRDX1,PRDX2,RACK1,RPL10A,RPL27,RPS24,RPS8,SCP2,SELENOP,SOD1,SPP1,SQSTM1,STARD10,TAGLN,TAGLN2,TNFAIP1,TPT1,TUBA1C,UBC,YWHAZ
Notch		group		-0.913	0.00105	ADAM12,ADM,ANKRD1,BIRC5,CCND3,CDCA7,CDH1,CDKN2B,DLL4,DUSP1,FGF5,FLT4,GADD45B,GUCY1A1,GUCY1B1,HEY1,HEY2,HEYL,ID1,ID3,IL6,JAG1,MCL1,MMP2,NET1,NFATC1,NOTCH1,POU5F1,PROX1,S100A11,SMAD2,SMAD3,SMURF1,SOX2,TAGLN,TLX3,VEGFA,ZEB1,ZEB2	2073 (17)
IgG		complex	Activated	3.686	0.00107	ADGRG1,ADM,APP,ASAH1,ATP1B1,B2M,BCL2L1,C3,CALR,CD9,CDKN2B,CEBPB,CEBPD,CLDN4,COL3A1,CRABP2,CSF1,CSF2,CTSC,CXCL8,DDX58,DEGS1,DHCR7,DSG3,DSP,DUSP1,DUSP14,EDN1,EFNA3,EGLN3,EGR1,EMP1,ETS2,EZR,FABP5,FGFBP1,FLT1,FN1,FOXO1,FST,GPRC5A,HLA-E,HSPA5,HSPB1,IER2,IFIH1,IFITM1,IFITM3,IL12RB2,IL1B,IL6,INPP5D,ISG15,ITGB8,KLK6,KLK7,KRT10,KRT18,LDLR,LGALS1,LGALS3,MAF,MAFB,PALD1,PDCD1LG2,PEA15,PHLDA2,PIM1,PLAUR,PLS3,…	1821 (15)
HLX	9.577	transcription regulator	Activated	3.092	0.00107	ANKRD1,AREG,BMP2,CCNB1,CLDN1,CTSS,CXCL8,CYP1B1,EGR1,GDF15,ICAM1,IL4R,JUN,KYNU,PLXNA1,PRDM1,RB1,SEMA3G,UIMC1,UNC5B	1529 (7)
ARHGAP31	2.515	other		1.921	0.00107	BMP2,BMP7,CCN2,CDH1,CDH2,COL5A1,COL6A1,COL6A2,FN1,GADD45B,GDF11,GDF15,ITGA5,JUN,OCLN,SERTAD2,SPARC,TGFB2,TGFBR3,ZEB2	1085 (11)
PNPLA2	1.133	enzyme	Activated	2.422	0.00107	ACADL,ACADM,ACADS,ACADVL,ACO2,ACOT2,ACOX1,ACSL1,CPT1A,CPT2,EP300,HSPA5,ICAM1,IDH2,INSR,IRS1,PDIA2,PDK4,PPARA,PPARG,PPARGC1A,PPARGC1B,SLC16A1,SLC2A1,SUCLG2,TP53,UBE2B,UCP2	2118 (18)
RARB	4.202	ligand-dependent nuclear receptor		-1.864	0.00109	ACADM,ADAM10,BCL2A1,BIRC2,CASP4,CASP7,CDH5,CDKN2B,CXCL12,CXCL2,CXCL8,CYP26A1,DDX58,DHRS3,DLG1,EGFR,EGR1,ENOX1,ETS1,EZR,FOXD3,GADD45A,GATA4,GBP2,GBP6,GJB4,GNB1,GSDMC,GSDME,HLA-C,HNF1B,HOXA10,HOXA5,HOXB7,HOXB8,ICAM1,ID1,ID3,IFI27,IFIT1,IFITM1,IGFBP3,IGFBP6,IL1B,IL6,ILF2,ITGAV,JUN,MMP11,NR2F1,NTN1,OTX2,PITX2,PLS1,POU5F1,PTGS2,RARB,RPL15,SAA1,SATB1,SERPINA1,SLC16A2,SLC2A1,SOX2,SPP1,STAT1,STAT6,TAC1,T…	2379 (20)
ADORA2A	2.658	G-protein coupled receptor		1.058	0.00111	ABCA1,AKT2,APP,ARF3,ARHGEF7,ATP2A2,ATP2B1,ATP8A1,BDNF,CAMKV,CD81,CKB,COL3A1,COL6A1,CSF1R,CXCL2,DGAT2,DSTN,DUSP1,EEF2,EIF2S2,FBL,GABRB3,GAPDH,GDI1,GLI1,GNG7,GPLD1,HHIP,HMOX1,HPCA,IFITM3,IL6,KIF5A,KIF5B,NAPA,NFKBIA,NOS2,NR4A1,NR4A3,NTRK2,OCLN,P4HB,PEA15,PMPCA,PPP1CA,PPP2CA,PPP3R1,PRKAR1A,PTGS2,RAB3A,RAB6A,SPARC,SPTBN1,SSRP1,STK38,TGFB1,TIMM44,TJP1,TSC22D3,TUBB4A,UBOX5,VEGFA	1594 (14)
n-nitrosomethylbenzylamine		chemical toxicant		-1.98	0.00111	ACTN4,ADAMTS6,AHNAK,ANXA2,AOX1,ARPC2,ATP6V0E1,BLOC1S4,CACNA1B,CASD1,CCNC,CCND1,CDYL,CLDN1,CTTN,DSC3,DUSP5,FGFBP1,FST,GATD3A/GATD3B,GCLM,GNG12,GOLGA7,GSS,GSTT2/GSTT2B,HIP1,HMOX1,KLF10,KLF5,LAMP2,LEPR,MAPK6,MCL1,MGST1,MSN,MYO10,NDEL1,PCSK9,PDCD10,PHGDH,PLK3,PLS3,PPP2R2A,PPP3CA,PRKAR1A,PTGS1,PTGS2,RAB1A,RAD23B,RB1,RBBP6,RGS17,SCEL,SDC1,SLC30A1,SPSB3,TGFA,TUBB6,TXNL1,UBE2C,UBE3D,UBXN4,USP14
ASXL1	-0.557	transcription regulator		0.728	0.00113	BAP1,CFD,G0S2,GPCPD1,GPD2,HK2,HOXA10,HOXA11,HOXA5,HOXA6,HOXA7,HOXA9,KLF15,LIPE,LPL,PDCD4,PELI2,POLR2K,PPARG,PPARGC1B,RAB12,RARB,SLC2A4,VEGFA	798 (7)
S100A8	-3.967	other	Inhibited	-2.805	0.00114	ACSS1,ALPL,APLN,AREG,ARG2,BCHE,BCL2L1,BCL3,BHLHE40,BIRC2,C1S,CALCB,CASP1,CCN5,CCNB1,CCND1,CCNE2,CD274,CDH3,CHDH,CPM,CSTF1,CXCL2,CXCL3,CXCL8,DYRK3,EFNA1,ENPP2,EPB41L4B,EPCAM,ETV5,FAS,FBLIM1,FOSL1,FURIN,GPRC5A,HEY2,HMOX1,ICAM1,IL1A,IL1B,IL1RL1,IL23A,IL6,ISG15,KLF15,LTBP1,MCF2L,MMP14,MMP2,NFKB1,NFKBIA,NGFR,NOS2,NR4A3,OLR1,PDGFC,PER1,PHLDA1,PLAU,PLK3,PLXNB3,PTGES,RAB20,ROBO2,RXRG,SCUBE1,SDCBP2,SEMA3B…	1972 (14)
TFRC	-1.65	transporter		-0.766	0.00114	ADGRG1,ANKRD22,ANXA2,ATF4,ATF5,BBC3,CASP3,CCNB1,CDK1,CHAC1,COL1A1,ECEL1,ERO1A,FAM20C,FTH1,FTL,GADD45A,GAS7,GPX3,GPX7,GSTT2/GSTT2B,HK2,HMOX1,HSPA5,JUN,KIT,LY75,ME1,PFKFB3,PHGDH,PIP5K1B,PPARG,SERPINB8,SLC2A1,SMAD2,SRXN1,STC2,SULF2,TGFB2,TNFRSF12A,TP53,UBE2E1,XBP1	762 (7)
ERBB4	4.285	kinase		0.543	0.00114	ADAM19,ADAM9,BDNF,CADM1,CASP4,CCN5,CCND1,CDH1,COL3A1,CTNNB1,CXCL12,DUSP1,EFNB2,EGFR,EGR1,ERBB4,FBLN2,GADD45A,GHR,GJB3,GPC1,HBEGF,HIF1A,HMOX1,IGFBP4,IGFBP5,JUN,MXI1,NID1,PIM2,PTGS2,RASA3,SERPINE2,SLC1A1,SLC2A1,SOCS3,STAG2,TIMP3,TLN1,TNC,TP53,WNT10B,WWP1	2485 (19)
palmitic acid		chemical - endogenous mammalian		-0.762	0.00115	ACADL,ACADM,ACLY,ACSL1,ADCYAP1R1,ADIPOR2,AHR,AKT1,ATF4,ATG5,BBC3,BCL2L1,BIRC3,CASP3,CCN2,CGAS,CTSB,CXCL2,CXCL3,CXCL8,DEGS1,DGAT2,EGLN3,F2RL1,FBXO32,FDPS,FN1,FOXO1,G6PD,GAPDH,GCK,GDF15,HK2,HMOX1,HSPA5,HTR2C,HTR7,ICAM1,IDE,IDH2,IL1B,IL6,INSR,IRF3,IRS1,IRS2,KLRG1,MAFB,MCL1,MET,MLXIPL,NCF2,NDUFA5,NFE2L2,NFKBIA,NOS2,NR4A1,NR4A3,NTN1,OLR1,PAX6,PDK4,PDX1,PLIN2,PNPLA2,PNPLA3,PPARA,PPARD,PPARG,PPARGC1A,PP…	2135 (18)
IRF3	-0.572	transcription regulator	Inhibited	-5.57	0.00115	ADAM9,AHNAK,ANOS1,ANXA4,APOBEC3B,ARG2,B2M,B4GALT5,BIRC2,BIRC3,CALHM6,CD274,CD58,CDH2,CMPK2,CXCL1,CXCL8,DAXX,DDX58,DDX60,DHX58,EIF2AK2,FAS,FN1,FST,GBP1,HELZ2,IFI16,IFI27,IFI44,IFI44L,IFI6,IFIH1,IFIT1,IFIT2,IFIT3,IFITM3,IL12A,IL15,IL1B,IL23A,IL6,IRF1,IRF3,IRF5,IRF7,ISG15,ISG20,JUNB,NLRC5,NOS2,NR3C1,OAS1,OAS2,OAS3,OASL,PARP12,PHF11,PIK3C3,PLAC8,PLCG2,PMAIP1,PML,PPP2R3A,PRNP,PTMS,PVR,RASA1,RSAD2,SAMD…	866 (14)
N-acetyl-L-cysteine		chemical drug	Activated	2.911	0.00116	ABCB1,ADIPOR1,ADM,ATF4,BCL2A1,BCL2L1,BIRC2,BIRC3,BMP2,C3,CASP1,CASP10,CASP3,CASP4,CAV1,CCN1,CCN2,CCND1,CDH1,CDKN1B,CFLAR,CLDN7,COL1A1,CXCL12,CXCL3,CXCL8,CXCR4,DUSP1,DUSP6,E2F1,EDN1,EGR1,FAS,FBXO32,FGF2,GCK,GCLM,GNAI2,GNL3,GSTP1,HAX1,HBEGF,HIF1A,HMOX1,HSPA5,ICAM1,IGF1R,IL12A,IL15,IL1A,IL1B,IL23A,IL6,IRAK1,IRAK4,IREB2,ITGA4,JUN,LPL,MAP1LC3A,MAPK14,MAPK8,MMP2,NCF2,NFATC1,NFE2L2,NFKBIZ,NLRP3,NOS2,NQO…	1993 (14)
ARID1A	-0.138	transcription regulator		0.272	0.00117	ALPL,ANXA1,ASCL2,AXIN2,BMP4,CCNB2,CCNC,DLL4,FZD2,FZD4,FZD5,FZD9,MEF2C,SOX9,TCF4,TERT,WNT3,WNT4,WNT5A	724 (7)
GH1		growth factor		0.257	0.00118	ABCC1,ACVR1,ATF4,CCNB1,CCND3,CD19,CDH2,CEBPB,CEBPD,CREB1,CTNNB1,CUX1,CXCR4,DECR1,EGR1,ERBB3,FN1,GADD45A,GATA2,GHR,HDAC1,ID3,IGF1R,IGFBP3,IL4R,IL6,ITGA1,JUN,JUNB,JUP,LDLR,MGST1,MLH1,NOS2,PRDX1,PTEN,RAD23A,RAD23B,RHOA,RPL6,RYK,SATB1,SIRT1,SMARCA4,SOCS2,SOCS3,SOD1,SPP1,TFAP2A,TNFRSF1A,UBA7,VEZF1,VIM,XRCC6,ZFP36	1942 (16)
IRF9	-2.004	transcription regulator	Inhibited	-2.693	0.00121	CDH1,CXCL8,GBP1,GBP6,IFI27,IFIT1,IFIT2,IFIT3,IFITM1,IFITM3,IL12A,IL18,IL1A,IL6,IRF1,IRF5,IRF7,IRF8,ISG15,MX1,OAS2,RTP4,SIRT1,SOCS3,STAT1,STAT2,ZBP1	1403 (15)
miR-27a-3p (and other miRNAs w/seed UCACAGU)		mature microRNA		0.876	0.00128	BBC3,CTNNBIP1,CYP1B1,EFNB2,EPHB4,FBXW7,FOXO1,GRB2,IFI16,MEF2C,NOTCH1,PKMYT1,PMAIP1,PPARG,PXN,RUNX1,RXRA,SMAD3,SPRY2,ST14,TRIM27,WEE1,ZBTB10
Cdc42		enzyme	Inhibited	-2.222	0.00128	BID,CASP1,CSF1,CTSA,CTSB,CTSD,CTSH,CTSS,CTSV,CTSZ,FAS,FGF2,FLNA,GATA2,GFI1,GSK3B,LAMP1,LAMP2,LIF,MYH9,NPC2,STMN1,TNFRSF13C	1453 (17)
WNT5A	11.973	cytokine		-0.592	0.00128	AREG,ARHGDIB,AXIN2,BCL2L1,BMP6,BTC,CAMK4,CAPN1,CCK,CCND1,CD14,CDH1,CDK8,COL1A1,COL2A1,CTNNB1,CXCL1,CXCL12,CXCL2,CXCL8,CXCR4,DLX1,EGFR,ENPP2,ERBB2,FLNA,FLT1,FN1,ID3,IKBKB,IL15,IL1A,IL1B,IL6,IRF1,IRF2,IRF8,KIT,LAMA3,NFKB1,NOS2,PRKCI,PTEN,PTGS2,ROR2,RUNX2,SDC1,SH3PXD2A,SOCS3,SPARC,SPP1,STAT1,STAT3,TLR1,TLR3,TNFRSF11A,VEGFA,VIM,WWTR1,YAP1	1522 (13)
miR-133a-3p (and other miRNAs w/seed UUGGUCC)		mature microRNA		0.622	0.00128	BCL2L2,CCN2,CXCL3,HCN2,IGF1R,KCNH2,KLF15,MCL1,NELFA,NFATC4,PKM,PTBP2,PTPRK,RHOA,RUNX2,SLC2A4,STK3,TINCR	1594 (11)
SNHG20	1.378	other		1.081	0.00129	CCNA1,CCND1,CDH1,CDH2,CTNNB1,GSK3B,VIM,ZEB1,ZEB2
USP9X	0.671	peptidase		-0.408	0.00129	BCL2L1,CTNNB1,DDX20,GEMIN2,GPSM1,ITCH,LATS2,MCL1,STIL	726 (7)
miR-196a-5p (and other miRNAs w/seed AGGUAGU)		mature microRNA		-1.081	0.00129	ANXA1,BAK1,COL1A1,HOXA7,HOXB7,HOXB8,HOXC8,HOXD8,IKBKB
SS18-SSX2		fusion gene/product		1.25	0.00129	AXIN2,BCL2A1,BCL2L2,CCND1,CDC25A,DKK1,FZD10,MCL1,SMARCB1	1635 (7)
caffeine		chemical drug	Activated	2.712	0.00129	ACP5,BDNF,CASP3,CAT,CAV1,CCN2,CDC25A,CDH1,CDK1,CUL7,CXCL8,EGFR,EGR1,EPAS1,F3,FOXM1,HIF1A,JUNB,LRP1,MICA,MICB,MITF,NR4A1,NTRK2,PPARG,PPARGC1A,PRKCA,PTGS2,SLC2A1,SMAD2,SRSF3,TAC1,TP53,TP73,VIM	2204 (19)
teichoic acid		chemical - endogenous non-mammalian		-1.673	0.00131	HIF1A,IL1B,IL6,MMP2,NOS2,PTGS2
EIF3M	1.377	other		0.816	0.00131	CDC25A,EIF3C,EIF3F,EIF3H,MIF,MT2A
ZNF395	0.259	other		-1.732	0.00131	IFI16,IFI44,IFIT1,IFIT2,MEF2C,PEG10
GSK690693		chemical drug		-1.633	0.00131	EPHA2,ERBB2,ERBB3,IGF1R,INSR,MET
Pdgf (complex)		complex		-0.928	0.00136	AKT1,CAV1,CCND1,CDK6,CDKN1B,CDKN2B,COL4A1,CXCL3,EDN1,EGFR,EGR1,EIF2S1,ERRFI1,F3,FAM189B,FGF2,FN1,FOXO1,HEY1,HEY2,HIF1A,HMOX1,ICAM1,IRS2,ITGA5,JAG1,JUN,JUNB,LDLR,MCM6,MCM7,MMP2,NCAM1,NOTCH1,PLAU,PLAUR,PPARG,PTGS2,PTPN1,SPARC,TERT,TGFB1,THBD,TIMP1,TIMP3,TP53,TWIST1,VEGFA	2129 (17)
INHA	0.803	growth factor		-0.43	0.00136	AREG,BOC,CCN1,CCN2,CDKN1B,CFLAR,COCH,COL3A1,COL4A4,COL4A5,COL4A6,COL6A1,CYP1B1,DHX32,E2F1,EGFR,ESPL1,F11R,FGFR1,FGFR4,FST,GJC1,HAS2,HSD17B11,IGFBP4,IL1R1,ITGA3,ITGA9,JAM2,KIT,KRT18,KRT8,LAMC3,LMNA,LTBP1,MATN2,MMP2,MYL9,MYO18A,PCDH7,PIK3R1,PRSS23,PTGS2,SGK1,SMAD7,SMARCA1,TBCEL,TJP1,TP53INP1,TUBE1	978 (7)
PIK3CA	-1.363	kinase		-0.542	0.00137	ALCAM,BAD,BIRC5,CA9,CALD1,CCNB1,CCND1,CD14,CDH1,CDH2,CDKN1B,CEBPB,CEBPD,FOXM1,GCK,GSR,GSS,HIF1A,IRS1,IRS2,ITGB1,JAG1,JAG2,NOS2,PDGFB,PDK1,PIK3CB,POU5F1,SLC5A5,SNAI2,SPARC,SREBF2,TGFB1,TGM1,TK1,TWIST1,VIM	2323 (16)
KLF2	-1.258	transcription regulator		1.508	0.00138	ADAM15,ADM,APLN,BCL3,BMP4,CAV1,CCN2,CCND3,CDH2,CDKN2B,CNP,COL4A1,CXCL2,CXCL8,CXCR4,CXCR5,CYP1B1,ECM1,EDN1,EFNA1,EPAS1,F2RL1,F3,FGF5,FLT1,GADD45A,GATA4,HIF1A,HPSE,ICOSLG/LOC102723996,ID1,ID3,IL1B,IL1RL1,IL6,IL7R,ITGA4,ITGB1,ITGB5,JUNB,KCNN4,LEPR,LGALS9,MMP14,MT2A,MVP,MYH10,NFKBIA,NOTCH1,NOTCH2,NQO1,PLOD2,PLPP3,PPARG,PRDM1,PTGS2,PTHLH,RALA,RGS3,RUNX2,S1PR5,SEMA3F,SERPINB9,SLC2A1,SMURF2,SOX9,STAT1,S…	1930 (20)
Am 580		chemical toxicant		-1.495	0.0014	ADM,CAT,CPT1A,CXCR5,DUSP1,F3,FDFT1,GSS,IFNGR1,IRF1,ITGA6,LIPE,LRAT,LSS,MVK,NOS2,NTRK2,PDCD4,PLIN2,PPARA,PPARG,RAI14,RARB,RARG,SOX9,SQLE,TGM2,THBD,TIMP1	1880 (20)
Ca2+		chemical - endogenous mammalian	Inhibited	-3.318	0.00143	ABCB1,AHR,APP,ARC,ATP2A2,BCL2L1,BDNF,CALR,CCK,CCN1,CCND1,CCND3,CD19,CDH1,CDK2,CDKN1B,CEBPB,CEBPD,COL1A1,COL2A1,CRY1,CSRP1,CSTF2,CTTN,CXCL8,CXCR4,CYP1B1,CYP27B1,DBP,DUOX1,DUSP1,E2F1,E2F2,E2F3,E2F5,EDN1,EGFR,EGR1,ELF3,ENPP1,FABP5,FGF2,FN1,FOSL1,FOSL2,GRK5,GUCY1A2,HBEGF,HOMER1,HSPA5,ICAM1,ICOSLG/LOC102723996,ID1,ID3,IGF1R,IL1B,IL6,IRF1,IRS2,ITGA3,ITGA6,ITPR1,ITPR3,JUN,JUNB,KCNG1,KLK5,KLK7,KRT10,KRT8…	1555 (14)
TLR4		transmembrane receptor	Inhibited	-5.05	0.00143	ACP3,ADM,APOBEC3B,APP,AREG,BAMBI,BCL10,BCL2L1,BMP2,C3,CASP7,CASP8,CAST,CCN1,CD14,CD274,CDH1,CDK6,CEBPD,CERK,CFLAR,CMPK2,CSF2,CXCL2,CXCL3,CXCL8,CYP27B1,DAXX,DLL4,DOCK11,E2F5,EDN1,EFNA1,F3,FAS,FBXO32,GBP2,GDNF,GRK2,HBEGF,HDAC1,HELZ2,HHEX,HMGB1,HMOX1,HNRNPU,HPSE,HSPA5,HTRA1,ICAM1,IDH2,IFI16,IFIT2,IFIT3,IFITM3,IL12A,IL15,IL15RA,IL18,IL1A,IL1B,IL23A,IL6,IRAK3,IRAK4,IRF1,IRF2,IRF3,IRF7,IRF8,ISG15,ISG20…	2182 (18)
NSD2	-0.35	enzyme		-0.174	0.00143	BACE2,CCNE2,CDC25A,CXCR4,E2F2,ERCC1,GADD45A,IGF2BP2,IRF7,ITGB1,JAM2,JUN,KMT2C,OAS1,PDCD10,PRKCA,RAB23,RRAS,STAT1,STAT3,TUBB4A,TWIST1	1721 (12)
GNA12	-0.989	enzyme	Inhibited	-2.645	0.00144	ARHGEF1,ARHGEF12,ARHGEF7,ARPC5,BAIAP2,CXCL8,DDR2,EGFR,EZR,G6PD,GCLM,GNA13,GSR,GSTP1,IQGAP1,IRS1,ITGA6,MAP2K1,MMP2,NOS2,PAK2,PDGFA,PIK3CA,PIK3CB,PIK3R1,PPP1CA,PPP1CC,PTGS2,PXN,RDX,RFFL,RHOA,RRAS2,SOS2,TAGLN,VAV2,VEGFA,VIM,WASL	2056 (17)
ROR2	3.192	kinase			0.00144	ABCF3,ACTR8,AURKA,AXIN2,BIRC5,BMP7,CCND1,CDC25A,CDC7,CDKN1B,CDKN2B,CDKN3,CHEK2,CTNNB1,GALM,HP1BP3,HSCB,MAP1B,MCM3,MORN4,NBN,NOTCH2,NTHL1,PIP5K1B,PMP22,PPARG,PPM1D,RB1,SMC1A,SPRY4,SSH1,TEAD2,TFDP1,TRAF4,TSEN2,TUBB2B,USP46,WEE1,XIAP	708 (7)
miR-122-5p (miRNAs w/seed GGAGUGU)		mature microRNA		-0.779	0.00148	AACS,ADAM17,AKT3,ANK2,ANXA11,AP3M2,ATP11A,BCKDK,BCL2L2,CCNG1,EGLN3,FAM117B,FOXJ3,FUBP1,GALNT10,GPX7,HMGB1,NCAM1,NFATC1,NFATC2IP,OSMR,P4HB,PALM,PKM,PRDX2,PSME1,RAB6B,SLC7A1,SLC7A11,TPD52L2,TRIB1,TTYH3,VIM,XPO6
mir-214	-2.495	microRNA		1.133	0.0015	ALCAM,ATF4,BIRC5,CADM1,CEBPB,CREB1,CXCL12,FGFR1,IGF1R,LDLR,NFKB1,PSMD10,PTEN,PTGS2,TFAP2A,TFAP2C
ceruletide		biologic drug		0.419	0.0015	ACTG1,ATF4,BIRC5,CDKN1B,CFLAR,CXCL2,CXCL3,EEA1,HMOX1,HSPA5,MME,PDIA2,PTGS2,TAC1,TPD52,XBP1	1350 (15)
resveratrol		chemical drug	Activated	2.266	0.00152	ADAM17,APP,BCL2A1,BCL2L1,BDNF,BIRC3,BIRC5,BMP2,CASP3,CCNA1,CCNB1,CCND1,CD14,CD46,CDH1,CDK2,CDK6,CDKN1B,CFLAR,CPT1A,CREBBP,CSF1R,CTNNB1,CXCL2,CXCL8,CYP1B1,DAPK1,E2F1,ECE1,EDN1,EGFR,EGLN1,EGR1,EP300,EPHA1,F3,FAS,FN1,FOSL1,FOSL2,FOXO1,FOXO4,FXN,GCK,GDF15,GLI1,HEY1,HEY2,HIF1A,HMOX1,HSPA5,ICAM1,IFIT1,IGFBP3,IL18,IL1B,IL6,IL7R,ISG15,ITGA1,JAG1,JUN,LDLR,LITAF,MAP2K1,MAPK14,MCL1,MICA,MICB,MITF,MMP2,NCOA4…	1936 (14)
HIF3A	2.875	transcription regulator	Activated	2.4	0.00154	APLN,EDN1,EPAS1,HIF1A,PLAUR,RARB,SLC2A1,SOX2,STAT3,VEGFA	2194 (14)
FZR1	-0.472	kinase		0.154	0.00154	CCNB1,CCND1,CDKN1B,HECW2,MAP3K2,PFKFB3,RNF157,SGO1,TK1,VHL	1815 (11)
ATXN3	-0.375	peptidase		-1.342	0.00154	APP,CREB1,CXCL12,IFIT1,IFIT2,IL1RL1,ISG15,MMP2,SOD2,UBE3A	628 (7)
verteporfin		chemical drug		1.961	0.00154	COL1A1,COL3A1,COL4A1,CSF2,CXCL2,EGFR,FN1,IL6,VIM,YAP1	1659 (10)
KMT2D	0.555	transcription regulator		-0.159	0.00155	ACADM,ADGRA3,ADGRG1,ADGRG2,ANO10,AP1S3,ARTN,ASL,BTG3,BVES,CCDC138,CCDC91,CDCA7,CHURC1,CKAP4,CRIP2,CTSD,DKK1,DSC2,DSC3,DSG3,E2F1,EBF4,EBPL,ECHDC2,ECI2,FAM117A,FBXL21P,FHL1,FOXQ1,GALK1,GALNT12,GK5,GKAP1,GPX7,GRHL3,HDDC2,HFM1,HOXC6,IGSF1,IKZF2,IL36RN,IRF1,IRF6,JAG2,KCTD15,KRT10,KRT23,LCK,LOXL1,LRRN4,LTK,MEOX1,MIR17HG,NT5E,OXR1,PCDH7,POGLUT3,POLE,POLE4,PPARG,PPIC,PPP2R2B,PRIMPOL,PRR15,PTGR1,PTTG1,RAB…	1958 (13)
LGALS3	-4.897	other		0.788	0.00155	ABCB1,ABCC1,CASP3,CCNB2,CCND1,CDKN1B,CLEC2B,COL3A1,COL4A1,CTNNB1,CTSF,CTSH,CTSV,CXCL2,CXCL3,DUSP6,ENPP2,FN1,GFRA1,GSK3B,ICAM1,IGFBP5,IL12A,IL1B,IL6,ITGA6,ITGAV,ITGB1,ITPR3,KRAS,KRT18,LAMP1,MAP2K1,MGST1,NOS2,PNPLA2,PPARG,PPARGC1A,PRDM1,PTEN,RAC1,RB1,SAA1,SOCS3,TCF4,TGFB1,WNT9A	1805 (16)
phosphate		chemical - endogenous mammalian	Inhibited	-2.14	0.00155	ACADSB,ADAMTS2,ADK,AKT1,ALPL,AXL,BMP2,COL19A1,COL5A1,CPNE1,CPT2,CYC1,CYP24A1,DAAM2,DECR2,DHRS7,DUSP6,ECM1,ECSIT,EGR1,ENPP1,ETV4,ETV5,FOSL1,GALNT3,H3C8,HK2,NCOR2,NDUFB10,NPM1,PLEC,POLR3K,RHOC,SDF2L1,SLC20A2,SLC25A5,SLTM,SPP1,SPRY4,STC2,STYK1,TFCP2,TGFB1,TIMP1,XRN2,ZFP36L2,ZNF346	1184 (12)
mir-24		microRNA		0.533	0.00156	AHR,ARHGAP19,ARNT,CCND3,CDH2,CDKN1B,CDKN2B,CDX2,DUSP1,FN1,FURIN,HNF1B,ICOSLG/LOC102723996,IFNGR1,IL6,JPH2,MAF,NDST1,NET1,PAK4,PARP1,PDX1,PRDM1,PSAP,PXN,RORA,SH3PXD2A,SNAI2,SPRY2,TGFB1,TRIB3	2022 (15)
TCOF1	0.554	transporter			0.00157	ADM,AKR1B1,ANKRD10,ANXA2,ARL4D,ASAP1,AZIN1,BCLAF1,BPHL,CAPRIN1,CRAMP1,EGLN3,GALK1,GTF3C4,HACD4,HNRNPDL,IQGAP1,MAPK14,MBOAT2,PDRG1,POLR3A,PPIL4,PSMC6,QRICH1,RASA1,RBM10,RMI1,SAFB2,SLC2A1,SNCB,STMN3,TBX2,TERF2,UBA3,UBOX5,WWC2
PRMT1	0.41	enzyme		-0.603	0.00159	ARG2,BMI1,CCND1,CDH1,CDH2,CLDN1,CNP,CTNNB1,CXCL2,FN1,FTH1,FTL,HOXA9,IGFBP6,MBP,MT2A,NKX2-2,OLIG1,OLIG2,POU5F1,PPARG,PRDX3,RARB,SMAD7,SNAI2,VIM,ZEB1,ZEB2	1975 (21)
SGPL1	-1.066	enzyme		-1.479	0.00159	ABCA1,ABCB1,ABCC1,APP,BCL2L1,DDX58,HSPA5,IFIT1,ISG15,MX1,OAS1,PHB2,PPARG,PTGS2,SEC61A1	2034 (21)
miR-18a-5p (and other miRNAs w/seed AAGGUGC)		mature microRNA		0.455	0.00159	AXIN2,BTG3,CCN2,CCND1,CTDSPL,E2F1,E2F2,E2F3,HIF1A,HSF2,KRAS,PIAS3,PTEN,SOX6,WNK2	1073 (7)
evodiamine		chemical - endogenous non-mammalian		1.648	0.00159	ABCB1,BCL2A1,BCL2L1,BIRC2,BIRC3,BIRC5,CASP3,CCND1,CFLAR,CXCL8,ICAM1,LIPE,MCL1,PTGS2,XIAP	1046 (12)
SS18	-0.667	transcription regulator		0.894	0.0016	C11orf96,CACNA1G,CAMK2B,CBX4,DUSP9,EPHB3,GADD45B,HES4,JAG2,MSX1,NFATC1,NGFR,PDGFB,RAB40B,SALL1,SOCS3,SOX2,SOX8,SYNE1,TENT5C,TLE3
ACVRL1	5.679	kinase		-0.842	0.0016	ACTB,BMPR2,CXCL12,CXCL8,CXCR4,EFNA1,EFNB2,ENG,GDF15,ICAM1,ID1,IL1RL1,JUP,PLAU,PLAUR,PXN,SMAD7,STAT1,TAGLN,VEGFA,ZYX	1834 (18)
Pkg		group		0.535	0.00167	ARC,BDNF,CAT,CTNNB1,EDN1,EGR1,HK2,JUN,LEF1,LGR5,PRDX2,SOD2,SOX9,TLN1	1948 (17)
EDNRA	0.225	transmembrane receptor	Inhibited	-2.137	0.00168	COL1A1,COL3A1,ECE1,GSC,ICAM1,MMP2,PTGS1,PTGS2,TGFB1,TIMP1,TIMP2	1714 (13)
(-)-norephedrine		chemical drug		0.302	0.00168	DHCR7,FDFT1,FDPS,IDI1,LDLR,LSS,MSMO1,MVK,NPC1,NPC2,SQLE
leupeptin		chemical - protease inhibitor	Inhibited	-2.578	0.00168	ABCA1,APP,CAV1,CD9,FOXO1,GBA,IGF1R,ITGB1,MAPT,RGS4,VRK1	1835 (11)
Rb		group		0.607	0.0017	BIRC5,CCNB1,CCND1,CCNE2,CDC6,CDH1,CDK1,CDK2,CDT1,DHFR,DLX1,DLX2,DUSP10,E2F1,E2F2,ECT2,FOXM1,GMNN,HDAC1,HERC5,MCM3,MCM5,MCM7,NEO1,PA2G4,PCYT1A,PLK1,POLD1,PPARGC1A,PTTG1,RBBP8,RBL1,ROBO3,RPA2,SLC5A5,SOD2,TERT,TOP2A,TP53,TP73	1830 (15)
CTBP2	-0.612	transcription regulator		1.369	0.00173	CCNA1,CCND1,CDH1,CDH5,CTNNB1,DLL4,EOMES,JUP,KRT8,NEFL,OCLN,PTEN,SPRY4	2115 (15)
miR-503-5p (miRNAs w/seed AGCAGCG)		mature microRNA		0.337	0.00173	ANLN,BMP2,BMP6,CCND1,CCNE2,CCNF,CDC14A,CDC25A,CHEK1,FGF2,FGFR1,RICTOR,WEE1
mir-144		microRNA		1.677	0.00173	ABI1,ADAM10,CELF2,EMC4,ETS2,KLF7,PGM1,RAB14,RAC1,RASA1,VCAN,YWHAZ,ZNF148
NOX1	-1.275	enzyme		-1.395	0.00173	CXCL8,DIAPH1,EGFR,EPAS1,F3,FLT1,NFKB1,NFKBIA,NOS2,PAK1,SMAD7,TGFA,VEGFA	1535 (13)
EMD	0.521	other		-0.832	0.00173	BMP2,E2F1,EGR1,HOXA13,HOXA5,HOXA9,HOXD10,IER3,IRF1,PPL,SOX2,STAT1,TGM1
vitamin K2		chemical drug		-1.022	0.00173	ABCB1,AGTR1,CD14,CD24,COL6A1,CSF1,DSE,GATA6,GPRC5B,MATN2,SERPINB1,SPP1,TSKU
E2F7	-1.704	transcription regulator			0.00173	CCNB1,CCNE2,CDC6,CDK1,CHEK1,DHFR,E2F1,E2F2,E2F3,ECT2,KIF23,RACGAP1
GPI	0.313	enzyme		0.435	0.00173	CAV1,CCND1,CDH1,CDKN1B,CXCL8,FN1,RAC1,RHOA,STEAP4,VIM,ZEB1,ZEB2	2098 (19)
ACSL5	-5.142	enzyme		-0.577	0.00173	ADAMTS6,ANOS1,ELAPOR2,GALNT13,GFPT2,GPRC5A,KCNJ8,MCAM,PEG10,PHLDA2,PPP4R4,TMEM40
glutamyl-Se-methylselenocysteine		chemical - endogenous mammalian		1.732	0.00173	EGR1,GNAI2,GSTP1,ID1,JUN,PLAUR,PSMA7,PSME1,RPS11,SOD1,TIMP2,TIMP3
NRF1	0.214	transcription regulator		0.33	0.0018	ATP1B1,CD47,CDH1,CDH2,CLDN1,COX5A,COX7B,CXCL8,CYCS,FTH1,GCLM,HMOX1,HPCA,HPCAL1,IDE,IL1A,KIF17,NCALD,NQO1,PSMB7,PSMC1,PSMC4,PSMC6,PSMD14,PSMD3,PSMD6,PVR,SNAI2,SPRR2D,TFB1M,TJP1,TOMM20,TP53,VIM,ZEB1	709 (7)
rosiglitazone		chemical drug	Activated	2.189	0.0019	ABCA1,ACADL,ACADM,ACADS,ACADVL,ACLY,ACO2,ACOX1,ACSL1,ACSL5,ADA,ADAM8,ADIPOR1,ADIPOR2,AGTR1,ANGPTL4,APOL6,AQP3,ASAH1,ASCL2,ATP5F1D,ATP5MC1,ATP5MC2,BDNF,BMPR2,C3,CASP3,CAT,CAV1,CAV2,CCN2,CCN5,CCND1,CCNE2,CD164,CDH1,CFD,CGB3 (includes others),CLEC7A,COL1A1,COL3A1,COL6A1,COX5A,CPT1A,CPT2,CREB1,CSF1,CTNNB1,CXCL11,CXCL8,CYCS,CYP24A1,DDHD1,DECR1,DGAT1,DGAT2,DHRS3,DLD,DLX5,DOK1,EGFR,EGLN1,EGLN3,ELOVL3,EO…	2150 (17)
sodium arsenite		chemical drug		-0.244	0.00193	ABCC1,BIRC5,CBS/CBSL,CCND1,CDK6,CDKN1B,CXCL8,EGR1,EPAS1,FTH1,GADD45A,GADD45B,GCLM,GSS,HIF1A,HK2,HMOX1,HSPA4,IL1B,JUN,LITAF,MAT2B,NFE2L2,OLR1,PPARG,RAF1,RND2,SLC2A4,SOCS3,SRSF3,TP53,VEGFA	1792 (17)
PRKAA1	-1.41	kinase		1.065	0.00199	ARHGDIB,BIRC3,CAT,CD24,CD302,CDC42EP3,CDH3,CDKN1B,CENPF,CXCL12,CXCL8,DDAH1,DOCK4,EGLN3,ELOVL2,EPHA3,FKBP5,FN1,FOXM1,GALM,GHR,HIGD1A,HSPA5,IGF1R,IGFBP4,IL6,ITGB5,ITIH5,KCNQ2,KLHL29,LITAF,LMO4,MATN2,MGST1,MMP16,NAP1L5,NCF2,NFIB,NFKBIA,NOS2,OCLN,PCOLCE,PMEPA1,PPARGC1A,PRKAA2,PSMB8,PTPRR,RHOU,RND3,SERPINI1,SIRT1,SIRT3,SLC16A1,SMAD3,SOCS3,SOD2,SORL1,TGM2,TJP1,TNFSF15,TNS1,TNS3,TP53,YAP1,ZFP36L1,ZNF462…	1819 (18)
collagenase		group	Inhibited	-2.998	0.002	ADM,CEBPB,CEBPD,CXCL12,CXCL2,CXCL3,EGR1,FOSL1,ICAM1,IER3,IL1A,IL1R1,IL6,IRF1,ITGA4,JUN,JUNB,SAA1,STAT3	1245 (8)
ROR1	1.284	kinase		-1.379	0.002	AMOTL2,AXL,CCN1,CCN2,CDH1,ETV5,GAS6,HEXB,MAP1B,MDFIC,SGK1,SNAI2,STMN1,TJP1,TNS1,TOP2A,TSPAN3,VIM,ZEB1	1127 (13)
NRXN1	2.294	transporter			0.002	CD47,CNTN3,COL4A6,CXCL12,DLX5,EPHA7,F11R,FBLN5,ITGA7,LHX1,LMX1B,NPTN,ONECUT2,PAX2,PCDH19,SLC1A3,SOX9,TGFB1,TNC
MAX	0.381	transcription regulator	Activated	2.771	0.00201	BCR,CBX5,CCNB1,CDC25A,CDKN1B,CDKN2B,CYCS,DHFR,DLEU1,E2F1,E2F2,EBF1,EDN1,FBXO32,FTH1,GADD45A,GADD45B,GLYR1,HK2,HMGA1,ID1,JARID2,KLF10,KLF6,LAMP2,MTF2,NPM1,PDK1,RARB,RBBP4,RBBP7,RBBP8,RCC1,RHOA,SCPEP1,SERINC3,SLC2A1,SUZ12,TERT,TSC2,TXNIP,UBE2C,WRN	1219 (7)
tert-butyl-hydroquinone		chemical reagent		-1.427	0.00201	ABCC1,AXIN1,CHML,CRYZ,ERCC5,FOSL1,FOSL2,FOXC1,FTH1,FTL,G6PD,GADD45A,GBE1,GCLM,GNAI2,GSR,GSS,GSTP1,HMOX1,HSPA5,HSPA8,JUN,JUNB,MAF,MAP1A,ME1,NEFH,NFE2L2,NQO1,NUP153,OSGIN1,PALLD,PHKA1,PSMD4,RAB6A,RASSF2,SESN2,SLC1A1,SNX19,UGT1A1,WNT5A,ZFP36L2,ZNF184	1848 (16)
mir-204		microRNA		-0.099	0.00203	ACVR1,ATF4,BDNF,BMP2,CAMK2B,CBFB,CHRD,CHRNA5,CHRNA7,CXCL1,CXCL2,CXCL8,FOXC1,GNB1,IL1B,IL6,ITPR1,LTBP1,MCL1,MICOS10-NBL1/NBL1,PIK3R1,PPP2CA,PTPN11,RUNX2,SMAD3,SMAD9,STXBP1,TGFBR2,VAMP2	2067 (21)
DKK1	-6.424	growth factor		-0.569	0.00206	APP,AXIN2,BDNF,BIRC5,BMP4,BMP6,CCND1,COL1A1,CTNNB1,DPAGT1,DVL3,EPCAM,EPHB2,FGF2,FOXG1,GSK3B,KRT18,LBH,LEF1,NKX2-5,NUMB,PPARG,RUNX2,SNAI2,SOX9,SPARC,TAGLN,TBX3,TCF4,TP53,TWIST1,WNT10B,WNT11,WNT5A	2610 (22)
IFN Beta		group	Inhibited	-6.042	0.00206	BAK1,BCL2L1,BST2,CASP4,CD274,CEBPB,CLK2,CXCL1,CXCL11,CXCL8,DDX58,DUSP1,EIF2AK2,ENPEP,FN1,HERC5,HLA-A,HLA-B,IFI16,IFI27,IFI35,IFI44,IFI6,IFIH1,IFIT1,IFIT2,IFIT3,IFITM1,IL12A,IL15,IL15RA,IL1B,IL24,IL6,INSIG1,IRF1,IRF7,IRF9,ISG15,KRT34,MSX1,MX1,MX2,N4BP1,NOS2,OAS1,OAS2,OAS3,OASL,PRKCA,RSAD2,SNAPC1,SPRY2,SPRY4,STAT1,STAT2,TAPBP,TGFB1,TLR3,TP53,TRAF3IP2,TRIM14,USP25,XAF1,ZBP1	1432 (17)
TOB1	0.428	transcription regulator		-0.138	0.00207	AMOTL2,ATR,BCL2L1,CCND1,CDK2,CDKN1B,CDT1,CHEK1,DPP7,GMNN,HJURP,KAT8,MBNL2,MIS18A,MIS18BP1,MKI67,PHLDA3,PLAC8,RBBP6,RPRM,SPDL1,STAG1,TCN2,TMED7,TP53,UBA6	2382 (22)
PRKAG3		other			0.00214	ABCA1,ACVR1,ANGPTL4,ANKRD1,ASPH,ATP1B1,CDH5,CELF2,CLASP1,CLCN3,CSGALNACT2,CTNNA1,DDIT4L,DNASE1,DUSP10,EGR1,EIF4B,ELL2,FBXO6,FGFR1,FTL,FXYD6,GBE1,GID4,GLRX,GOLM1,GPX3,HFE,HIVEP2,HSPA5,ID1,IGFBP5,IL15,ITGA6,ITIH5,JPT1,JUNB,KDM2B,MAFA,MAP4,MID1IP1,MMD,MTERF2,NEO1,NR3C1,NRIP1,PHLDA3,PLIN3,POLE4,PPARGC1A,RAMP1,RGCC,RHOU,RNF128,RPL12,RPL5,SH3KBP1,SHISA2,SLC2A1,SLC40A1,SLC44A2,SLC4A3,SLC7A2,SMS,SNCG,TFR…
JAK2	-2.048	kinase	Inhibited	-3.064	0.00216	ACER2,ACTB,ACTN1,AKR1C3,AKT1,BBC3,BCL2L1,BMP7,CALCB,CASP1,CCND1,CD19,CDC25A,CDC42BPB,CDH1,CDKN1B,CFLAR,CSF2,CTNNB1,CXCL8,DCXR,DHX40,EGR1,ENPP2,ESRRA,FGF2,FN1,FOXO1,GBP2,GCNT2,ICAM1,IGF1R,IL1B,IL6,IRF1,ITGA5,JAK2,KDM6A,LAT2,LMO2,LYN,MYL12A,NDN,NOS2,NR4A1,OSMR,PDE2A,PFN1,PHLDA3,PLK2,PSMB9,PTGS2,SDC4,SERPINH1,SKIL,SLC1A3,SOCS3,SPTB,STAT1,STAT3,TAP1,TGM2,TP53,TP53INP1,TRAM1,TSC22D1,XIAP,XIST	1478 (15)
tosedostat		chemical drug		-0.517	0.00222	ATF5,CARS1,CBS/CBSL,CEBPB,CHAC1,CLEC7A,CTH,CXCL8,FYN,GADD45A,PSAT1,SDC1,SESN2,SLC38A2,SLC7A11,STC2,TRIB3,VEGFA
LONP1	0.067	peptidase		-1.162	0.00222	ACADS,ALDH1L2,ANXA2,ATF4,ATP5F1D,ATP5IF1,ATP5PF,C1QBP,CALU,CHAC1,COX5A,DLD,EARS2,ECI1,ECSIT,FASTKD2,GARS1,GFER,GLUD1,GPT2,HNRNPA2B1,HSPB1,HSPD1,MDH2,MRPS31,MTERF2,P4HB,PDIA3,PFN1,PTGS2,S100A11,SMDT1,SOD1,SOD2,SSBP1,TPM3,TRAP1,TUFM
PRC2		complex		-1.879	0.00227	ASCL2,BMP2,CDX2,FGF5,GATA4,GATA6,HAND1,HOXB5,HOXB6,HOXD10,IFITM1,JAM2,LRAT,MMP2,MX1,NKD1,OAS1,OLIG1,OLIG2,PCDH10,PPP2R2B,TBX3	1423 (13)
TFAP4	1.369	transcription regulator	Activated	2.365	0.00227	BCL2L1,CDH1,CDH2,CDK2,CLDN1,CLDN4,CLDN7,EGR1,ESRP2,FN1,GDF15,GMFB,ID1,LEF1,LGR5,LIF,OCLN,PHYHIP,RHOBTB3,SALL2,STEAP3,VIM	1640 (7)
MEOX2		transcription regulator	Activated	3.446	0.00227	CDKN2D,CXCL1,CXCL2,CXCL3,CXCL8,EDN1,EFNA1,F3,FGF2,HBEGF,ICAM1,ID1,ID3,ID4,IL6,ITGAV,ITGB5,LRP1,MMP14,NKX3-2,TNFAIP3,VEGFC	1875 (16)
PRKN	5.127	enzyme		0.712	0.00227	AXIN2,CCND1,CDK6,CTNNB1,EGFR,FUBP1,GLO1,IL1B,IL6,LEF1,MAOA,MCL1,PDHA1,PLK2,PRDX1,PRDX2,PRDX6,PSEN1,PSEN2,TCF4,TP53,XBP1	2095 (17)
TGFA	-6.068	growth factor	Inhibited	-3.966	0.00227	AKT1,AREG,BCL2L1,BIRC3,BIRC5,CASP1,CCN2,CCND1,CEBPB,CSF2,CTNNB1,CXCL2,CXCL8,E2F1,EGFR,ERRFI1,FOSL2,GPER1,GSTP1,HSD17B1,ICAM1,IGFBP4,IL6,JUNB,MUC4,PLA2G4A,PLAGL1,PRNP,PTGS1,PTGS2,PTTG1,RB1,S100A10,SERPINA1,TGFA,TGFB1,TP53,VEGFA,VIM,WNT5A	2603 (17)
NFYA	0.043	transcription regulator		-1.357	0.0023	ABCB1,ACLY,BBC3,BIK,CALR,CAT,CBS/CBSL,CCNB1,CCNB2,CDC25B,CDCA8,CDK1,CHEK2,E2F1,EGR1,F8,FTH1,GADD45A,GADD45B,GPAM,GUCY1B1,HSD17B7,HSPA5,ICAM1,IRF1,JUN,JUNB,LMAN1,MLH1,NOTCH1,PIDD1,PKM,PMAIP1,POLA1,PTTG1,RGS4,RHOB,RRM2,TGFBR2,TOP2A,TXNIP,UBE2I	2317 (17)
ADAM10	-1.565	peptidase		-0.593	0.00231	AGTPBP1,APP,ATP2A2,BID,CACNA2D1,CCND1,CDH2,CDH5,CDHR1,CSF1,CXCL12,CXCL16,DCLK1,DTNA,EGFR,GNA13,HIP1,HPRT1,ICOSLG/LOC102723996,IL36G,IL6ST,IRAK1,ITGA5,LCK,MDM4,MEF2C,MET,MICA,MKKS,PAX6,PDIA3,PPP1R13L,PRNP,QKI,RGS4,RPGR,SHANK3,SOX9,SYP,SYT1,TGFB1,TRIM9,USP14,XCL1	2233 (21)
Rock		group	Inhibited	-2.219	0.00232	APP,BMP2,CAVIN1,CCN2,CCND1,CDH1,COL1A1,COL3A1,CXCL8,DMD,ETS1,F3,FN1,ICAM1,LPP,MAFK,MIR17HG,NGFR,NOP16,PPARG,PPP1R12A,RUNX2,SORT1,SOX9,SPP1,TAGLN,TGFB1,TJP1	1660 (16)
SMYD1		transcription regulator		1.763	0.00232	ACADL,ACO2,BDH1,CYC1,CYCS,FAHD1,HAND2,HK2,IDH3G,MIF,MPC1,NDUFA5,NDUFAB1,NDUFV1,NT5C2,OGDHL,PDHB,PGD,PKM,PPARA,PPARGC1A,PYGB,PYGL,RXRA,UBC,UGP2,UQCRC1,UQCRC2
benzo(a)pyrene		chemical toxicant		-0.884	0.00234	ABCB1,ABHD4,ADAM12,AGTPBP1,AHR,AJUBA,ALG2,ANXA1,ARHGDIA,ARHGEF6,BBC3,BIRC5,BTG3,C1QTNF2,CAMLG,CASP3,CCN1,CDC25B,CELF2,CKS1B,COL8A1,CYP1B1,DDB1,DHRS1,ECT2,ELF3,ERCC5,ESD,FGF9,FGFR3,FST,FYN,G6PD,GCLM,GNA11,GNAI1,GNAI2,GNAO1,GPC1,GSTP1,HAS2,HK2,HMOX1,HSPA1A/HSPA1B,HSPA4L,HSPB1,IER3,IGFBP6,IL1B,IL1RAP,ING1,INSR,ITPR1,JUN,LIMK2,MAF,MAFF,MAP2K1,MAP3K2,ME1,NBEA,NMI,NQO1,NR4A1,NUDT16,PDLIM1,PGD,PLCB1,PPC…	2052 (16)
NEUROG1	2.596	transcription regulator	Activated	3.182	0.00235	AMIGO2,BEX1,C1orf115,C1S,C3,CD82,CEMIP,CFH,COL3A1,CXCL1,DSP,EPAS1,FGF9,FN1,GASK1B,GFPT2,HAS2,IL6,LGR5,LRIG1,MEST,NEO1,P4HA2,PLK2,PPIC,RHOA,S100A4,SLC43A3,SPOCK1,SQOR,SULF1,TRIM22,TSPAN7	1358 (7)
VitaminD3-VDR-RXR		complex	Inhibited	-2.1	0.00235	CCNC,CD14,CDKN1B,COL13A1,CSF2,CYP24A1,CYP27B1,FOXO1,GADD45A,HOXA10,IGFBP3,IGFBP5,IGFBP6,IL12A,IL1RL1,KLK6,MXD1,PDGFA,PPARD,SEMA3B,SERPINB1,SPP1,TGFB2,THBD,WT1
RASSF5	-0.791	other		-0.232	0.00246	BTG3,BZW1,CD99,DTYMK,EEF2,FAT1,GTF3A,LRRFIP1,LSM7,NAP1L3,PCMT1,PDCD2,PUM2,RAB32,RPS15,SAT1,U2AF1/U2AF1L5
ATG5	-1.389	other	Activated	2.038	0.00246	APP,CASP3,CASP7,CKAP4,HSPA5,HTT,IFIH1,IKBKE,IRF3,PDIA3,PSEN1,ROBO3,RTN4,SCARB1,SQSTM1,TBK1,TGM2	1844 (17)
phorbol 12,13-didecanoate		chemical toxicant	Inhibited	-2.265	0.00246	ABCB1,CCK,CDH1,CDK1,CSF1,CYCS,DUSP1,HSF2,IL1RAP,KCNN2,MAX,MCL1,PARP1,PRKCD,SGK1,SOD2,TP73	2069 (18)
SENP7	-0.308	peptidase	Activated	2.63	0.00246	BIRC2,CACNA1C,CDH1,CDH2,CXCL8,DHFR,VIM	743 (7)
MALAT1		other		0.626	0.00246	CDH1,HIF1A,KRAS,SNAI2,TWIST1,VEGFA,VIM	1496 (10)
carnosol		chemical - endogenous non-mammalian		0.576	0.00246	CTNNB1,GCLM,HMOX1,ICAM1,NFE2L2,PTGS2,TP53	1939 (21)
SS18-SSX1		fusion gene/product		-0.411	0.00246	AXIN2,BBC3,CCND1,CDC25A,DKK1,PMAIP1,SHCBP1	1920 (11)
hydrocortisone		chemical - endogenous mammalian		0.901	0.00253	ADM,ALDH18A1,ANKRD1,APP,BCLAF1,BDKRB2,BIRC5,BMPR2,BRCA2,CCN2,CCND1,CCND3,CDH2,CDK1,CEBPB,CEBPD,CFD,CIAO3,CXCL8,CXCR4,DAXX,DDX17,EP300,EZR,FAS,FGF2,FGF9,FN1,GABBR2,GADD45B,GBP1,HSPD1,ICAM1,IGFBP3,IGFBP4,IGFBP5,IGFBP6,IGFBP7,IL1B,IL6,ITGA2,LPL,LY75,NDUFA6,NFKBIA,NR3C1,NTRK2,PLA2G4A,PPARG,PROX1,PTGS1,PTGS2,SEMA6A,SMO,SMPD2,STAT5A,STC2,TLE2,TLR2,TNFAIP2,TNFAIP3,TP53,TP53I11,VAMP2,VIM	2376 (14)
DGCR8	0.323	enzyme		-0.252	0.00265	ADGRG6,BDNF,CCND1,CDH1,CNP,EGR1,ERBB2,ERBB3,GDNF,ID4,JAG1,KRAS,MBP,MITF,NCAM1,NFATC1,NGFR,NOTCH1,NRCAM,OLIG1,PDCD4,PMP22,POU3F2,SMO,SOX2,TAGLN,TNC	1637 (16)
PLK1	0.748	kinase		-0.601	0.00265	ANKRD1,BBC3,BMI1,BOK,CDH1,CDH2,CFLAR,CTNNB1,DTX3L,EGFR,EPHA2,FBXO5,GMNN,IER3,IFI16,PARP9,PIK3R1,PLA2R1,PLK1,PYCARD,SMAD7,SNAI2,TERT,TGFB1,TGFB1I1,TGFB2,VIM	2027 (16)
IL6	-7.722	cytokine	Inhibited	-6.085	0.00267	ABCA1,ABCC1,ABCC3,ACER2,ACOX1,ACVR1,ADAMTS13,ADGRB1,ADGRE5,ADGRL2,ADM,AHNAK,AHR,AKT1,ANXA1,APP,AREG,ARL4C,ATP2A1,ATP2A2,AXIN1,AXIN2,BAK1,BAMBI,BBC3,BCL2L1,BCL3,BDNF,BGN,BIRC5,BMI1,BMP2,BMP6,BST2,BTC,C3,CAPRIN1,CASP1,CASP3,CASP4,CASP7,CCK,CCN2,CCNA1,CCNB1,CCNB2,CCND1,CD14,CD274,CD46,CD82,CDC45,CDC6,CDH1,CDK1,CDK2,CDKN1B,CDKN2B,CDKN2D,CDKN3,CDX2,CEACAM1,CEBPB,CEBPD,CENPA,CENPE,CFD,CFH,CFLAR,CHEK1,C…	1773 (13)
methyl methanesulfonate		chemical toxicant		-1.351	0.00268	ADGRB3,CCNG1,CDH1,CTSD,DDB2,DESI2,EGR1,EIF1,GADD45A,GADD45B,HPRT1,JUN,LIF,MCL1,NMI,PHLDA3,PLXNB2,PPM1D,ST14,TP53,TP53INP1,TRIM22,VIM,XPC	2238 (17)
miR-203a-3p (and other miRNAs w/seed UGAAAUG)		mature microRNA		1.113	0.0027	BMI1,CDK6,E2F3,F2RL1,IL11,PRKCA,PTHLH,RNF2,RUNX2,SIRT1,SOCS3,SRC,SUZ12,TPD52L1,VEGFA,ZNF148
SPRY1	0.429	other		0.48	0.0027	AXIN2,EOMES,ETV4,ETV5,FGF9,FGFR3,ISG15,LMO4,LOX,LOXL3,MEST,MMP11,MMP14,MMP2,NR2F1,SP8
MAP4K4	-0.574	kinase		-1.298	0.00274	ACACB,ACADS,ACADVL,ACLY,ACO2,ACSL5,ALDH3B1,ALDH4A1,ALG9,APIP,ATP6V0A2,ATP6V0E1,CEBPB,CHPT1,COX11,CYC1,DLD,FAR1,HSD3B7,ITGA5,MAFA,MAFB,MGLL,MLXIPL,MPI,NDUFA3,NDUFA5,NDUFAB1,NDUFS4,NDUFS8,NDUFV1,NT5C2,OGDH,PDHX,PDX1,PDXP,PEX11A,PGM1,PI4K2B,PIGO,PLA2G6,PNPLA3,PON2,PPARG,PRKAR2A,PTDSS2,PTGES,PTS,RPS6KB1,SCP2,SLC2A4,ST3GAL2,ST3GAL4,UQCRC1	2431 (20)
PSMB11		peptidase		1.221	0.00281	CAV1,CCND1,CDH4,CLDN23,CLDN4,CLDN7,COL1A1,COL3A1,COL4A6,COL5A1,COL6A1,COL6A2,CREB5,CTSS,CTSV,CXCL12,CXCL3,EGFLAM,ENPEP,FLT1,GADD45A,GADD45B,GNB3,HMOX1,HPSE,HSPA1A/HSPA1B,IL23A,KIT,LAMA1,LGALS3,LIFR,LY75,MAPK12,NCAM1,NID1,NR4A1,NTN4,OCLN,PARVB,PDCD1LG2,PTGS2,PTK2B,RELT,RHOB,ROBO2,TGFB2,TNFRSF11A,TNFRSF12A,TNFRSF21,TNFRSF8,VCAN,VEGFC	1693 (7)
NFKB1	-1.462	transcription regulator	Inhibited	-4.086	0.00282	ABCB1,AKR1B1,ANKRD1,ANKRD2,APP,B2M,BAMBI,BCL2A1,BCL2L1,BCL3,BHLHE40,BIRC3,BMP2,BRCA2,CCN1,CCN2,CCND1,CD59,CD82,COL1A1,COL2A1,CREB3,CRMP1,CSF1,CSF2,CTSB,CXCL11,CXCL2,CXCL3,CXCL8,CXCR5,DLL4,DUSP1,E2F1,EGFR,EGR1,ELF3,ENPP2,FABP6,FANCD2,FAS,GADD45A,GBP1,GFRA1,GNAI3,GNAO1,GNPAT,GRK5,HAS2,HMOX1,ICAM1,ICOSLG/LOC102723996,IER3,IGFBP3,IKBKB,IKBKE,IKBKG,IL12A,IL18,IL1B,IL23A,IL6,IRF1,ISG15,ITPR1,JAG1,KCNT2…	2015 (11)
Collagen type I (complex)		complex	Inhibited	-2.957	0.00282	APP,BIK,CCND1,CDH1,CDH2,CDX2,COL1A1,CSF2,CTNNB1,EIF4EBP1,FN1,IL6,ITGA1,ITGA2,ITGA3,ITGAV,ITGB1,MCL1,MMP14,MMP2,PLAU,PLOD2,PRRX1,PTEN,PTGS2,RAC1,RECK,RUNX2,S100A10,TGFB1,TIMP2,TNC,TP53,VIM	1998 (19)
calphostin C		chemical - kinase inhibitor		1.408	0.00282	ABCB1,AXIN2,BCL2L1,BIRC5,CCND1,CDC25A,CSF2,CXCL8,DKK1,DUSP1,ECE1,ETS1,GFPT1,HSP90B1,HSPA5,ICAM1,IGF1R,IL6,KIT,LDLR,LPL,NOS2,NQO1,NTN1,P4HB,PLAU,PPARG,PTGS2,SCARB1,SLC2A1,SLC2A4,SOD2,TP53,VEGFA	1315 (13)
bafilomycin A1		chemical drug		-0.085	0.00289	BCL2L1,BST2,CD9,DLL4,FOXO1,GRN,HTT,KCNH2,MAP1LC3A,NFKBIA,NOS2,PTGS2,RHOB,SLC7A1,SQSTM1,TFRC,TIMP2,TNFRSF10A,TRIB3,ULBP2	2503 (16)
mir-34		microRNA		-0.451	0.00291	AHCYL1,AXL,BIRC3,BIRC5,CBY1,CCND1,CCNE2,CD47,CDC25A,CDK6,CREB1,CSF1R,CXCL3,E2F3,E2F5,EFNB1,EMP1,FAM76A,FOSL1,HEY1,JHY,KCNH2,LEF1,MDM4,MET,MLLT3,NOTCH1,NOTCH2,RUNX2,SATB2,SEMA4B,SIRT1,SLC30A3,TGIF2,TP53,TUBB4B	2119 (23)
HOXA13	8.749	transcription regulator		0.331	0.00296	BMP2,BMP7,CXCL8,EPHA4,EPHA7,HOXA13,HOXB6,IL6,KRT34,MAB21L1,PTGS2,SHROOM3,SOX9,VAPA,WNT5A
WNT7A	-5.858	cytokine		1.94	0.00296	CDH1,CDH2,CHRNA7,HOXA10,HOXA11,LBH,LMX1B,PLAUR,RUNX2,SPRY4,TWIST1,VIM,WNT4,WNT5A,ZEB1	1933 (15)
ETV1	1.339	transcription regulator		-1.199	0.00296	ADRB2,CXCR4,E2F1,ERBB2,HPSE,HSD17B7,ITGAV,MITF,PLAUR,SOX9,TERT,TGFBR2,TWIST1,VIM,WWTR1	629 (7)
bee venom		chemical - endogenous non-mammalian		-0.688	0.00296	ARC,AREG,CCNB1,CCNL1,CDC42EP4,CREBBP,CXCL8,DDX6,EHD1,ETS2,FEM1C,GADD45A,HSPA4L,HSPB1,ICAM1,IFRD1,IL11,IL1B,IRF1,ITGA5,ITGAV,ITPKC,JUN,JUNB,KIF23,KIFC1,MAP3K8,MKI67,MSN,MYH9,NFKBIA,NLRP3,NOS2,OASL,PTGS2,PTPN11,REXO1,SERPINB2,SLC7A11,SOCS3,THBD,TNFAIP2,TNFAIP3,TOP2A,TSC22D1,ZBTB7A	1534 (11)
PRKCE	-0.136	kinase	Inhibited	-3.695	0.00297	ABCB1,ADAM12,AMIGO2,APP,BCL2L1,BIRC3,BIRC5,CAV1,CCN1,CCND1,CCND3,CDH1,CDON,CEBPB,CSF2,CXCL8,E2F1,EGFR,EGR1,HSPA5,IL1B,IL6,IL6ST,IRF3,JUN,JUNB,LDLR,NFKB1,NOS2,PDCD4,PDGFA,PIM1,PRKD1,PTGS2,STAT3,SYP,VEGFA,XIAP	939 (10)
CCL5	-5.449	cytokine	Inhibited	-3.583	0.00297	ADGRE5,AHR,ALCAM,ATF4,BDNF,CAPN2,CXCL2,CXCL3,CXCL8,CYP1B1,DDAH1,DUSP1,DUSP6,EMP1,F2RL1,GFI1,HMGA1,IER2,IL12A,IL1B,IL6,LIMS1,MAPK1,MAPK3,NCOR2,NOS2,OLR1,PLAUR,PLEC,SERPINB2,SGK1,SOD1,SQLE,STAT1,STAT3,TUBB4B,VASP,ZFP36	1565 (13)
ITGB1	-2.03	transmembrane receptor		-0.851	0.00297	ABCC1,ADAM15,ADAM17,ADAM19,ADAMTS2,BMP1,CDH1,CDH2,CDKN1B,COL19A1,COL1A1,COL4A4,COL7A1,CXCL8,EIF4EBP1,ERBB2,FBN2,FGFR3,FLNA,FN1,GAS1,GDF6,HAS3,HSPG2,ICAM1,IL12A,IL1B,IL6,ITGA3,ITGA5,ITGA7,ITGA9,ITGAV,JUN,JUNB,LAMA1,LAMB1,LAMC1,LIMS1,LOX,LOXL1,LTBP3,MATN2,MMP2,NOS2,PLAU,PLAUR,PTGS2,RAC1,RAC2,ROBO1,SPON1,TCF4,TGFB1,TGM2,TIMP2,TNFAIP3,TP53,VEGFA,VIM,WNT5A,WNT9A	2137 (20)
AG490		chemical - kinase inhibitor	Activated	2.696	0.00299	AKR1C3,AKT1,BCL2L1,BIRC3,BIRC5,BMP7,CASP3,CCND3,CD24,CTTN,CXCL2,CXCL8,EDN1,ENPP2,FGF2,HIF1A,HMGB1,ICAM1,IL1B,IL6,IL7,IRF1,JAK2,LMO2,LYN,MCL1,MYH10,NOS2,OCLN,PIM1,PTGS2,PTTG1,S100A10,SAA1,SOCS3,SOD2,SPP1,STAT1,STAT3,TAGLN,TERT,TIMP1,TWIST1,VEGFA	1616 (14)
salmonella minnesota R595 lipopolysaccharides		chemical - endogenous non-mammalian	Inhibited	-6.239	0.00302	ACSL1,ADAM9,AK3,ARHGAP25,AXL,BCL3,CASP4,CEBPD,CFLAR,CMPK2,CXCL1,CXCL2,CXCL3,CXCL8,EGR1,ETS2,FOSL1,GDF15,ICAM1,IFIT2,IKBKE,IL12A,IL1A,IL1B,IL6,IRF1,IRF8,ISG15,JAG1,JUN,JUNB,LPAR1,LZTFL1,MAFF,MDFIC,MET,MKI67,NFKB1,NFKB2,NFKBIA,NFKBIZ,OASL,PTGS2,RELB,RSAD2,SAMHD1,SERPINB2,SLC7A2,SLFN12L,SLFN5,SOCS3,TLR2,TNFAIP3,TPM3,TSC22D1	1819 (13)
LRP1	-1.263	transmembrane receptor		0.705	0.00303	APP,C1R,C1S,CD14,CDH1,CDH2,COL3A1,CREB1,CTSD,GLI2,IDE,IL1B,IL6,INSR,ITGB1,LRP1,MMP2,MRC2,NOS2,PLIN2,PTGS2,SLC2A4,SMO,SQSTM1,WNT10B,WNT5A	2077 (16)
TFEB	-0.551	transcription regulator		-1.697	0.00305	ARSA,ATP6V0E1,ATP6V1C1,ATP6V1H,CDH1,CLCN7,CTSA,CTSB,CTSD,CTSF,GBA,GLA,GNS,IL1B,IL6,LAMP1,NAGLU,PPARG,PSAP,SCPEP1,TPP1,VEGFA,WT1	1730 (13)
SPARC	-6.6	other		-0.551	0.00319	ABCC4,ACOT2,AGK,AKR1C3,ARG2,BHLHE40,BLM,BRCA2,BRIP1,CDH1,CDH3,CDYL,CEBPD,CFD,CHAF1A,CHAF1B,CIART,CLDN1,CLDN4,COL1A1,CTSF,DAB1,FN1,FOXQ1,IL6,LEF1,LRP8,MBD4,MCM6,MID2,MMP2,MSH2,NIPAL1,NIPSNAP2,NOTCH1,NOTCH2,P2RY2,PCGF2,PIK3C2G,POLE,RRM1,SLC7A11,SNAI2,SOX9,SPARC,TGFB1,TRIM25,TRIM5,TSKU,VIM,ZHX2	1497 (20)
CREM	0.338	transcription regulator		-1.526	0.00319	ABCA1,ADRB2,ANXA4,APOLD1,ARC,ATP2A2,BHLHE40,C7orf31,CAMK4,CCNA1,CCNB1,CCND1,CD8A,CDK5,CEBPB,CIART,COL3A1,COL8A1,CRABP2,CSF2,CXCL8,DUSP1,DUSP14,DUSP4,EGR1,ERRFI1,FRMD6,GADD45B,GPD2,HAND2,HSPA4,IDI1,IRAK1,IRS2,JUNB,KLF5,LDHC,LDLR,LSS,MCL1,MEST,MIDN,MSMO1,MVK,NAB2,NFATC1,NFKBID,NOS2,NOTCH1,NPC2,NR4A1,PACRGL,PDE3A,PER1,RARB,RHOB,RYR2,SERTAD1,SIAH2,SIK1/SIK1B,SLC16A1,SLC2A4,SMC4,SPATA20,SPTY2D1,TAC1,T…	2329 (21)
prostaglandin A1		chemical - endogenous non-mammalian		0.454	0.00321	BCL2L1,CD14,CSF2,CXCL8,GAD1,HMOX1,HSPA1A/HSPA1B,HSPA4,IL6,LPAR6,NFKBIA,PTGS2,SOAT1,TP53	1793 (13)
miR-199a-3p (and other miRNAs w/seed CAGUAGU)		mature microRNA	Activated	2.243	0.00321	CALU,CEBPB,CREB1,FN1,FUBP1,ITGA6,MET,NFKB1,PON2,PRDX6,PTGS2,RUNX1,SUZ12,VCAN	1880 (11)
IND S1		chemical - kinase inhibitor		0.535	0.00321	ACTB,ATP5F1B,ATP5F1D,C1QBP,CFL1,COX5A,ETFA,GLOD4,HIBCH,HSPA1A/HSPA1B,PDIA3,PRDX1,PRDX2,STIP1
PTPN3	-1.495	phosphatase	Inhibited	-3.194	0.00321	ADAM17,ANGPTL4,CDKN2B,COL1A1,E2F2,FN1,IL11,ITGAV,JAG1,PDGFB,SMAD7,TAGLN,TGM2,VDR	2330 (19)
1L-6-hydroxymethyl-chiro-inositol 2-(R)-2-O-methyl-3-O-octadecylcarbonate		chemical - kinase inhibitor		0.726	0.00322	CXCL16,GDF15,IL6,MMP2,MT2A,NOS2,PPARG,PTGS2	1674 (15)
NQO2	0.407	enzyme	Inhibited	-2.828	0.00322	BIRC2,CCND1,CFLAR,CXCL12,CXCR4,NOS2,PTGS2,XIAP	1682 (14)
BMS-754807		chemical drug		-0.563	0.00322	BIRC5,EGFR,EPHA4,ERBB2,ERBB4,MET,MKI67,TGFBR2	1906 (12)
miR-335-5p (and other miRNAs w/seed CAAGAGC)		mature microRNA		0.542	0.00322	DAAM2,FHOD3,FMN2,FMNL3,KIT,PTPN11,PXN,RASA1
mir-503		microRNA		1.018	0.00322	BMP2,BMP6,CDC25A,FGF2,FGFR1,IGF1R,SMAD7,SMURF2
SPRY4-IT1		other		-0.338	0.00322	CDH1,CDH2,CLDN7,ESRRA,F11R,OCLN,VIM,ZNF703	1587 (7)
HOXB3	0.889	transcription regulator		1.551	0.00322	CDCA3,EFNA1,HOXB5,HOXB6,HOXB7,HOXB8,NKX2-1,OTX2
RYBP	0.486	transcription regulator			0.00322	CDC6,CDX2,GATA4,HOXA7,MSX1,NKX2-2,PAX3,RUNX1
ADIPOR2	-0.394	transmembrane receptor		-0.726	0.00322	ACOX1,ADIPOR2,GCK,NDUFA1,PPARA,PPARG,PTGS2,UCP2	1171 (7)
N4BP1	-0.693	other		1.57	0.00322	HLA-A,HLA-B,JUN,JUNB,MAP3K14,NFKB2,RELB,TP73	1611 (10)
IGBP1	0.413	phosphatase		-0.87	0.00322	CASP1,CDH1,CLDN1,ELAVL1,IRF1,NOS2,RAC1,TJP1	744 (7)
TP53BP2	0.78	other		-1.911	0.00322	BBC3,CCN2,CDH1,CTNNB1,FAS,TP53I3,VIM,ZEB1	2049 (18)
cortistatin A		chemical reagent		-0.707	0.00322	BHLHE40,CDKN1B,ETV6,FOSL2,GFI1,IRF1,IRF8,JARID2
tiron		chemical reagent		0	0.00322	DUSP1,HMOX1,HSPA5,IL6,KRAS,PLAUR,PRDX2,TNC	1508 (17)
gossypol		chemical drug		0.585	0.00322	ATF4,BCL2L1,CXCL1,CXCL8,MCL1,NCOA3,PMAIP1,SAT1	1632 (7)
Jnk		group		-1.35	0.00323	ABCA1,ADARB1,ALDH1A2,APLN,APP,ASAH1,ATG5,BCL2L1,BIRC3,BIRC5,BRMS1L,CASP3,CCN2,CCND1,CDH1,CDH2,CELF2,CFLAR,COL1A1,COL3A1,CRIP2,CXCL12,CXCL3,CXCL8,CXCR4,DKK1,DUSP1,EDN1,EGR1,ETS1,F2RL1,F3,FAS,FBXO32,FN1,GADD45A,GDF15,GDNF,HMOX1,HSPA5,ICAM1,IL11,IL1A,IL1B,IL23A,IL6,ITGA4,JUN,KLF6,MAP3K11,MCL1,MIR155HG,MMP14,MMP2,MRC2,MSH2,NFE2L2,NOS2,NQO1,NR4A1,OCLN,PDGFB,PLAU,PLAUR,PLSCR1,PON2,POU5F1,PPARD,PPM1D,PT…	1990 (14)
prostaglandin J2		chemical - endogenous mammalian		-1.334	0.00326	CCND1,CFLAR,CSF2,CXCL8,GDF15,HMOX1,HSPA1A/HSPA1B,IL6,NOS2,PSMB2,PSMB3,PSMB7,PSMC5,PSMD12,PSMD3,PSMD6,PTGS2,SLC2A4,UBE2H	1824 (20)
Fgf		group		-0.552	0.00326	CCND1,CCND3,CDH1,GNL3,IGF1R,IL6,JUN,JUNB,LPCAT1,MITF,MMP2,NKX2-5,OTX2,PER1,PTGS2,RUNX2,SPRY2,SPRY4,STAT1	1928 (17)
RAB1B	-0.671	other		-1.167	0.00326	COPG1,COPZ2,CXCL8,DERL1,GOLGA1,GOLGA2,GOLGA3,JUN,KDELR1,NAPA,RAB32,RHOBTB3,SEC24D,SERP1,SLC5A5,SRP54,STX3,STXBP1,YIF1A
mir-22		microRNA		0.881	0.00326	ARRB1,BMP6,BMP7,CCN1,CCND3,CLIP2,EDC3,ERBB3,FOSL1,FRAT2,HK2,IL6,LEF1,MAPK14,MECOM,PTMS,TGFBR2,TP53INP1,YWHAZ	1295 (16)
DDX58	-4.466	enzyme	Inhibited	-3.544	0.00333	AHNAK,ALPL,CASP4,CXCL8,DDX58,EIF2AK2,GBP3,IFI27,IFI35,IFI44,IFIH1,IFIT1,IFIT2,IFIT3,IL1B,IL6,IRF1,IRF3,IRF7,IRF8,ISG15,ISG20,LTBP3,NFATC4,NMI,OAS1,PTGS2,RSAD2,SOCS3,SPP1,STAT1,STAT2,TLR3,WNT4,ZC3HAV1	979 (16)
diethylstilbestrol		chemical drug		-1.782	0.00339	ADCY6,ADCYAP1R1,AHR,ALDH1A3,ALPL,AMH,AQP3,AREG,ARHGDIB,BCHE,BTC,C3,CCN2,CCNB2,CCND1,CD14,CDH13,CDKN1B,CENPE,CENPF,CLSTN2,COL1A1,CRABP2,CTTN,CYGB,DCLK1,DNMT3B,DUSP6,EGFR,EGR1,EMP1,EN2,ESRRA,ESRRB,F3,FAS,FDPS,FGFBP1,FOXM1,GADD45A,GAL,GATA4,GATA6,GLRX,GPER1,GREB1,GSPT1,HBEGF,HIC1,HLA-A,HOXA10,HOXA11,HOXA9,HSP90B1,HTRA3,IGF1R,IGFBP2,IGFBP3,IGFBP6,IL36RN,IL4R,IQGAP3,IRS1,JAK2,KIF22,LGALS1,LMO4,LRRK2,L…	2259 (18)
Y 27632		chemical drug		1.301	0.00339	ACTB,ACTG1,ADA,AMOTL2,AXL,BBC3,BMP2,BMP4,BMPR2,CCN1,CCN2,CDH1,CDH5,CDKN2B,CEBPB,COL12A1,COL2A1,HAS2,HTT,ICAM1,IL18,IL6,MMP2,PERP,PLAU,PPARG,PTGS2,RHOA,SOX5,SOX6,SOX9,TAGLN,TGFB1,TJP1,TP53,VIM,YAP1	2119 (17)
kainic acid		chemical toxicant	Inhibited	-2.638	0.00342	APOLD1,APP,ARNT,ATF4,BCL2L1,BDNF,CACNA1C,CACNA2D1,CAPN1,CASP3,CCND1,CEBPB,CIART,CLTC,CRMP1,CSF1R,CTSE,DUSP1,E2F1,EGR1,ERBB4,ERRFI1,FGF2,FGF9,FGFR3,FOSL1,FOSL2,GADD45B,GDNF,GFRA1,HBEGF,HOMER1,HYOU1,IL18,IL1B,JUN,JUNB,KCNQ2,KLK6,LMO2,NCAM1,NFKBID,NGFR,NPTX2,NR3C1,NR3C2,NR4A1,NTF4,NTRK2,PACRGL,PER1,PIM3,PTGES,PTGS2,RABEP2,REST,RGS4,SDC1,SLC16A1,SPP1,SPTY2D1,SYP,TIMP1,TIPARP,TJP1,TMEM158,TP53,VEGFA,X…	2031 (19)
PKD1	1.351	ion channel		0.352	0.00342	ABCB4,ACOT2,ACSS1,ADCY3,ADCY6,ADCY7,ALG6,AMOTL2,AMPH,ARHGAP10,ASPH,ATP1B1,ATP1B2,AXL,CAMSAP2,CAVIN1,CCN1,CCN2,CDC42BPA,CLCF1,COL12A1,CREBBP,CTNNB1,CXCL16,CXCL2,DENND2B,EDIL3,EGFR,EIF4EBP1,ENPP5,FGFR1,FGFR3,FOXO1,GATM,GLI2,GRAMD1A,HBEGF,HDAC9,IER2,IFNLR1,IL1RL1,JAKMIP2,JPH2,KCTD14,KLHL28,KRT18,LOX,LTBP1,MCUB,MINK1,MYSM1,NIPAL1,NNMT,PCDH7,PCDH9,PDCL,PI4KB,PICALM,PITX2,PKNOX2,PML,PSEN1,RAB9B,RADIL,R…	2043 (13)
PPP3CA	-0.859	phosphatase		-0.79	0.00343	APP,ATP2A2,C3,CD82,CD9,CDH2,CDKN1B,CPT1A,CSRP1,CTSV,DECR1,FN1,FTL,GRN,GSTP1,IGF1R,KRT18,KRT8,LAMP2,LCAT,LITAF,LPAR1,MAGT1,MGST1,NFATC1,NFATC3,PLPP3,PMP22,PPP3R1,PRDX5,PSAP,PTGS2,RUNX2,S100A4,SDC4,SLC2A4,SPP1,STS,VIM	1793 (19)
miR-296-5p (miRNAs w/seed GGGCCCC)		mature microRNA		1.638	0.00344	ABCB1,AKT1,CCND1,CDKN1B,COL1A1,CRB3,HGS,HMGA1,LYPLA2,SCRIB,TNC,TP53,VEGFA
TP53COR1		other	Inhibited	-2.359	0.00344	BBC3,BID,BIRC3,CASP1,CASP8,CFLAR,FAS,IL1B,PLK2,PMAIP1,SOD2,TOP2A,TP53INP1	1947 (14)
CSNK2A1	-0.394	kinase		-1.485	0.00344	AHR,BCL2L1,CCND1,CDH1,DUSP6,EOMES,FN1,ITGA3,JUP,SNAI2,TP53,VIM,ZFP36	1755 (15)
EML4-ALK		fusion gene/product		0.622	0.00344	BIRC5,CD274,CDH1,COL3A1,CTNNB1,EGFR,ERBB3,HIF1A,MITF,OCLN,SMAD2,SPARC,VCAN	1302 (12)
SATB2	1.929	transcription regulator		1.015	0.00346	ADGRG6,AUTS2,BBC3,BCL11B,CDH3,E2F5,EFEMP1,ENPP1,IFI44,ITGA8,KRT8,LIMA1,MMP16,MRPL41,NNMT,PDE3A,PERP,PLXNA2,PRRX1,PWWP3B,SDC2,SLAIN1,SPP1,UPF3B,ZNF626	1365 (7)
MEN1	1.555	transcription regulator		0.007	0.00346	AKT1,CASP8,CCNB2,CCND1,CDH1,CDKN1B,CDKN2B,CTNNB1,FOXC1,FOXC2,GAS1,GLI1,HOXA7,HOXA9,HOXC6,HOXC8,IGFBP2,IRS2,MAFA,MEN1,PDX1,PTPRZ1,RUNX2,TERT,TGFBR2	2324 (17)
pimagedine		chemical drug		0.919	0.00348	BCL2L1,CASP1,CASP3,CASP6,CAST,CAV1,CCN2,CFLAR,COL4A1,CXCL8,GADD45B,GCK,HBEGF,HMOX1,ICAM1,IL6,LAMB1,NOS2,OPA1,TAGLN,TGFB1,VEGFA	1850 (18)
ACOX1	-0.482	enzyme		-0.082	0.00348	ABCD3,ACADL,ACADM,ACADVL,ACER2,ACOT2,ACOX1,ACSL1,ANXA2,CAT,CD63,CES3,COL4A2,CRAT,CTBS,CTSE,CTSV,CXCL12,CYP26A1,EGFR,ELOVL3,ETS2,FAM214A,GADD45A,GSDMC,GSTP1,H2AX,HDAC1,HSPA5,IGFBP2,IL1RAP,IMPACT,KLF6,KRT23,KRT8,LGALS3,LGALS3BP,LPL,MGLL,NFE2L2,NR1H3,PALMD,PDK4,PEX11A,PHLDA1,PLIN2,PLSCR1,RBM3,RPL12,RPS24,SELENBP1,SERPINA1,SGK1,SLC16A1,SLC4A4,SQSTM1,TAGLN2,TNFRSF10A,TP53,TRIB3,UCP2,UGCG,UGT8,XBP1	1812 (11)
MRTFA	0.726	transcription regulator	Inhibited	-3.303	0.00359	ACTB,ACTG1,AMOTL2,ANKRD1,ANLN,BCL2L1,CBFB,CCN1,CCN2,CCN5,CD177,CD24,CDC42BPA,CDC42EP3,CLDN15,CNN2,COL25A1,CTTN,CXCL12,CXCR4,CYFIP2,DDAH1,DIAPH3,EDN1,EGR1,ELOVL3,EPPK1,ETV6,EYA2,F11R,FLNA,FNBP1L,G0S2,GADD45A,GFI1,HLA-A,HOTAIR,ICAM1,ID1,ITGA5,ITGA6,ITGB1,LIMK1,LMNA,MAFK,MAPK13,MMP16,MYH10,MYH9,MYL9,NREP,OSCP1,OSTN,P2RY1,PFN1,PFN2,PTGS2,RAB27B,RAC1,RAMP1,RHOBTB1,RUNX1,SCARB1,SELENOP,SERINC3,SERPINB2…	1535 (20)
WWC1	-1.733	transcription regulator		-0.333	0.00363	BMP2,CCN2,CDH1,CDH2,MKI67,OCLN,PDGFB,VIM,YAP1	1253 (9)
PAK4	-0.503	kinase		0.457	0.00363	CCNA1,CDH1,CDH2,CTSB,LIFR,PPARG,SNAI2,TJP1,VIM	1909 (16)
L1CAM	-3.433	other		-0.392	0.00363	ARHGDIA,IDI1,IL1B,LGR5,MMP2,NBN,NOS2,SMOC2,SQLE	1984 (17)
DDB2	-1.63	other		-1.295	0.00363	BBC3,CFLAR,E2F1,EIF2AK2,NFKBIA,SEMA3A,SOD2,TP53,VEGFA	2547 (26)
ITGA3	-6.069	other		-0.254	0.00363	CTSV,DAB1,FN1,ITGA2,MMP2,PLAU,PTGS2,RHOA,TLN1	1245 (18)
KLK4	3.201	peptidase			0.00364	CCNB1,CCNB2,CCNG1,CDC34,CDK7,CDKN2B,CDKN3,CHEK1,CUL4A,E2F2,GADD45A,MKI67
hemoglobin		complex		-1.934	0.00364	ADM,CXCL8,EDN1,GCLM,HMOX1,IL6,ME1,MGST1,NQO1,PIR,SLC40A1,TFRC	2790 (22)
SEL1L	-0.498	other		1.455	0.00364	DNAJB11,DNAJC3,HSPA5,NOTCH1,OLIG2,PAX6,PTEN,SERP1,SOX2,TIMP1,TIMP2,XBP1	1393 (11)
mir-154		microRNA		0.031	0.00364	BIRC5,CCND1,CDKN1B,FZD4,HMOX1,KIT,KLF10,PLAUR,PMP22,PTEN,STAT3,WNT7B	2061 (16)
AKR1B1	0.867	enzyme		-1.287	0.00364	ACOX1,BCL2L1,BIRC5,CCND1,CFLAR,CPT1A,E2F1,MKI67,MMP2,NOS2,PPARG,XIAP	1060 (14)
KNG1		other	Inhibited	-2.551	0.00367	APP,ASIC1,ASIC3,BDKRB1,BDKRB2,CALR,CCN2,CCND1,COL1A1,CXCL8,EGFR,FGF2,IDE,IL1B,IL6,PTGS1,PTGS2,TGFB1	1273 (18)
ACKR3	-4.639	G-protein coupled receptor		-1.784	0.00367	ADM,AKR1C3,AXL,CCNB1,CCND1,CCND3,CFH,CXCL12,CXCR4,EGFR,HBEGF,IGFBP7,IL24,MMP14,RAC1,RB1,RRAS,STMN1	1657 (18)
Sn50 peptide		chemical toxicant	Activated	2.267	0.0037	BCL2A1,BCL2L1,BCL2L2,BIRC2,BIRC3,BIRC5,CCN2,CXCL2,CXCL8,CYP27B1,FAS,GNAI2,HMGB1,HMOX1,ICAM1,IL15,IL1B,IL6,LIPG,MIF,MMP2,NOS2,OPRD1,PPARG,PTGS2,RACK1,SLC1A3,SLC8A1,TNFRSF21,TP53,TYMP,XIAP	1762 (10)
ATF3	1.473	transcription regulator	Activated	2.674	0.00371	ADIPOR1,ARF1,ATF4,AURKA,BBC3,BHLHE41,BIRC3,CCND1,CD82,CDC25A,CDK1,CDK2,CHAC1,CTNNB1,CXCL1,CXCL16,EPHA1,GBP2,GBP4,GBP6,GSN,HSPA5,HSPB1,ICAM1,ID1,IL1B,IL6,ITGA1,JUN,LDLR,MMP2,MSH2,MT2A,NFKB2,NFKBIZ,NOS2,PLK1,PTGES,RIPK2,RSAD2,SLC15A3,STAT3,TLR2,TP53,TP53I3,TP73,XBP1,XIAP	2108 (17)
DPH5	1.188	enzyme			0.00377	CREB1,CREBBP,EEF2,EP300,IL1B,IRF1,NFKBIA,SMAD3,STAT1,STAT3,TP53
NREP	0.933	other		-1.108	0.00377	COL3A1,FGF2,ITGA3,ITGA5,MMP2,PDGFA,PDGFB,TAGLN,TGFB1,TGFBR2,VEGFA	729 (7)
PFKFB3	-1.588	kinase		-1.523	0.00377	CCND3,CDK1,CDKN1B,CXCL12,EPAS1,FGF2,ICAM1,IL1B,IL6,PDGFB,TGFB1	2160 (19)
CBX4	0.83	transcription regulator			0.00377	CCNB1,CDC25A,CDC6,DHFR,HOXA7,MCM3,MSH2,POLA1,RBL1,VEGFA,WNT4
CHEK2	0.969	kinase		-0.493	0.00377	BCL2L1,BIRC5,CCNG1,E2F1,H2AX,KRAS,OCLN,TJP1,TP53,TP53BP2,TP73	2272 (18)
SFRP4	5.212	transmembrane receptor	Inhibited	-2.36	0.00377	AXIN2,BIRC5,CCND1,CDH1,CTNNB1,DVL3,FGF5,FN1,NKX2-5,TWIST1,VIM	1871 (11)
MAML1	0.401	transcription regulator		0.102	0.00377	CCND1,CDH1,CXCL8,EGR1,HEY1,HEY2,HEYL,IL1A,IL1B,IL7R,RND3	1818 (17)
Go6983		chemical - kinase inhibitor		0.518	0.00377	ACADM,CCN2,CLDN1,FLT1,PPARA,PPARG,PRDX1,PRKCA,PRKCD,PTGS2,SCARB1	1606 (15)
HDAC4	-0.62	transcription regulator		-0.783	0.00378	ANGPTL4,ARC,BDNF,CACNA1C,CACNA2D1,CALCB,CCNB1,CHN1,CHRDL1,CNTN1,CYFIP2,DLL4,DMD,FGF13,FOSL1,FST,GADD45A,GPM6A,HDAC1,HDAC5,HDAC9,HIF1A,HOMER1,HOMER2,IL6,JUN,KLHL2,MAPK1,MAPK8,MBP,MEF2C,MYH10,MYOM2,NBEA,NOS2,NR4A1,NRCAM,PMP22,PPM1E,PPP3CA,PRKCA,PTGS2,RAB3C,RGS4,RGS7,RTN1,RUNX2,SERPINB2,SH3GL2,SLC17A7,SLC2A1,SLC2A4,SLC8A1,SYN2,TAGLN,TERT,TNFRSF12A,TRPV1,TSPAN7,VEGFA	2176 (21)
xanthine		chemical - endogenous mammalian	Inhibited	-2.322	0.00378	CXCR4,DUSP1,DUSP10,ID3,MMP14,MMP2,PLAU,PLAUR,SLC2A1,TIMP2	1756 (18)
GON4L	0.047	transcription regulator			0.00378	CCNB1,CCNB2,CCND1,CCND3,CCNF,E2F2,MKI67,RAD21,RBL1,TFDP1
MEG3	-2.023	other		1.553	0.00378	CDH1,COL1A1,FN1,GDF15,HIF1A,JUN,TP53,VIM,ZEB1,ZEB2	1945 (19)
TCF/LEF		group		-1.182	0.00378	BIRC5,CCND1,FN1,ITGB1,JUN,MMP2,PTGS2,RUNX2,SNAI2,VIM
STOX1	-0.194	other			0.00378	ACTG1,CALM1 (includes others),CLASP1,FANK1,FSIP1,GADD45B,MAPT,PSMF1,RAB10,SRSF7
DANCR	0.237	other		0.5	0.00378	CDH1,CDH2,CTNNB1,RAB1A,RUNX2,SNAI2,TIMP2,TIMP3,VIM,ZEB1	745 (10)
IDH2	2.023	enzyme			0.00378	CDH1,CLDN7,EGR1,FN1,PPARG,RAB25,TGFB2,VIM,ZEB1,ZEB2	1155 (7)
F10	-2.023	peptidase	Inhibited	-2.281	0.00378	CCN1,CCN2,CXCL8,EGR1,F3,ICAM1,IL6,MIF,MMP2,VEGFA	1170 (15)
SRSF3	0.53	other	Inhibited	-2.023	0.00378	CCND1,CCND3,CXCL8,E2F1,E2F7,FOXM1,JUN,PDCD4,TP53,VEGFA	1459 (7)
RALA	-0.635	enzyme		-1.213	0.00378	CD24,CDH1,CDH2,CTNNB1,FOXO4,MMP2,PLAU,PLAUR,TP53,VEGFC	2234 (16)
DGAT1	0.639	enzyme	Activated	2.135	0.00378	ACOX1,CPT1A,DGAT1,DGAT2,LPL,PDK4,PNPLA2,PPARA,PPARD,PPARG	2437 (22)
gamma-tocotrienol		chemical drug		0.713	0.00378	BCL2L1,CCND1,CTNNB1,IL18,IL1B,IL6,JUN,NFKBIA,NLRP3,TNFAIP3	1524 (11)
noscapine		chemical drug	Activated	2.393	0.00378	BCL2L1,BIRC2,BIRC3,BIRC5,CCND1,CFLAR,ICAM1,MCL1,PTGS2,XIAP	1862 (13)
RTN4	-1.677	other		1.916	0.0038	AP2A2,APP,ARHGDIA,BDNF,CAPZA2,CFL1,DPYSL5,GNAO1,GNB2,GNG2,IL6,IMPACT,JUN,MAPRE3,MBP,NEFL,NQO1,PEA15,RHOB,RTN4,STAT1,TAGLN3,TUBB4A,VEGFA,YWHAB,YWHAG,YWHAQ	1888 (18)
carrageenan		chemical drug	Inhibited	-2.378	0.0038	BCL10,BDKRB1,CXCL2,CXCL3,CXCL8,EGR1,F2RL1,FOSL1,FOSL2,GRB10,ICAM1,IL1B,IL6,JUN,JUNB,KIT,NFKB1,NFKBIA,NOS2,NR3C1,PARP1,PTGES,PTGS2,RPS6,SELENOP,VEGFA,WNT9A	1393 (12)
miR-125b-5p (and other miRNAs w/seed CCCUGAG)		mature microRNA		1.27	0.00385	ACSS1,AJUBA,ANAPC16,APLN,ARID3A,ARID3B,BAK1,CASP6,CASP7,CBFB,CDC25A,CDH5,CDK6,E2F3,ELAVL1,ERBB2,ERBB3,GSS,H3-3A/H3-3B,HK2,ID1,ID3,IGFBP3,JARID2,JUN,KLF13,LIPA,MAN1A1,MAP2K1,MAP3K11,MAPK14,MAZ,MYD88,NOS2,PERP,RBM8A,SGPL1,SMO,TP53,UBE2I,UVRAG,VPS4B,VSIR,ZNF385A	2437 (16)
SUMO3	-0.625	other		0.614	0.00396	APP,CAV1,CAV2,CD59,CEACAM1,CHRNA7,CTH,CXCL16,GRB14,HMGA1,HSPA8,IL6,IRS1,ISG15,LAMP3,MMP14,MOXD1,PML,TAP1,TNC,TNFRSF21	2215 (22)
BUD23	0.867	enzyme		1	0.00396	CXCL8,FKBP5,IL6,PLAGL1,TSC22D3	1805 (7)
polyinosine-polycytidylic acid/polyethylenimine formulation		chemical reagent		-1.419	0.00396	BIRC5,DDX58,IFIH1,PMAIP1,XIAP	718 (7)
NCGC00186528		chemical reagent		1.253	0.00396	COL3A1,COL4A1,FN1,PPARGC1A,TGFB1
myristic acid		chemical - endogenous mammalian		-0.64	0.00396	F2RL1,NR1H2,NR1H3,PLIN2,RXRA	1184 (7)
RBM5	0.992	other		1.961	0.00396	ADAM9,ANXA1,ATP5MC3,BIRC3,C19orf57,CASP10,CDK2,GBE1,GPER1,ICAM1,IFITM3,IL32,INSIG1,ISG15,MCL1,MLH1,MYO1B,NCOA3,PIM1,RAB1A,SERPINH1,TSPAN6,UCP2,XIAP
dimethylnitrosamine		chemical toxicant		-0.101	0.00396	BMP3,CCNC,CDH1,COL1A1,COL3A1,COL4A1,FGFR4,HMOX1,ICAM1,IGFBP5,IL1B,IL6,MAPK3,NFE2L2,NOS2,NQO1,NR4A1,PRKCH,RALB,SOD2,TGFB1,TGM2,TIMP1,VIM	2206 (16)
N-[N-(3,5-difluorophenacetyl-L-Ala)]-S-phenylglycine t-butyl ester		chemical - protease inhibitor		0.679	0.00396	APP,BCL2L1,CDKN1B,CSF1,CXCR4,DLL4,FLT1,HEY1,HEY2,IL1B,IL6,MSX2,MYD88,NFKB1,NOS2,NOTCH1,PDGFB,PTPRF,RELB,RND3,SIM2,SOX2,TGFB1,VEGFA	1565 (12)
prostaglandin E2		chemical - endogenous mammalian	Inhibited	-4.018	0.00399	AHR,ANGPTL4,ANXA2,APP,AQP3,ARC,AREG,ATP2A3,BAK1,BCL2L1,BIRC3,BIRC5,BMP2,CASP1,CASP3,CASP4,CASP6,CASP7,CCN2,CCNB1,CCND1,CD14,CD226,CD274,CD46,CDH1,CEBPB,CEBPD,COL1A1,CSF1,CXCL1,CXCL12,CXCL3,CXCL8,CXCR4,DGAT1,DUSP1,EEA1,EGFR,EGR1,ERBB2,ESRRA,ETS1,F2RL1,FAS,FGF2,FLT1,FN1,FOSL1,FOSL2,FOXO1,FST,FSTL3,GCNT1,HAS2,HIF1A,HMOX1,ICAM1,IER3,IGF1R,IGFBP4,IGFBP5,IGFBP7,IL12A,IL15RA,IL1A,IL1B,IL1R1,IL23A,IL6,IL…	2183 (15)
bisindolylmaleimide I		chemical - kinase inhibitor	Activated	2.264	0.00399	ALPL,AQP3,ARNT,BAD,BCL2A1,BCL2L1,BIRC3,CCN2,CGB3 (includes others),CLCF1,CLDN1,CTNNB1,CXCL8,E2F1,E2F2,E2F3,EGFR,EGR1,EIF4EBP1,FGF2,FN1,GATA4,GDF15,HAS2,HMOX1,HSPA5,ICAM1,ID3,IL23A,IL6,KCNC1,KCNJ11,KRT10,LPL,MAPK1,MAPK3,MET,MMP2,NFKBIA,NKX2-5,NR4A1,OCLN,PDCD4,PRKCA,PRKCD,PTGS2,PTTG1,SOD2,TJP1,TSG101,VEGFA	1123 (15)
PAX5	3.553	transcription regulator	Activated	2.138	0.00405	BCL2L1,BIK,CCND1,CD19,CDKN1B,CSF1R,CTNNA1,CTNNB1,FN1,G6PD,GPRIN3,HK2,INSR,MET,MMP2,MSN,NR3C1,PAX2,PRDM1,PTPRF,PYGL,SDC1,SLC16A10,SLC2A1,SLC2A6,TNFRSF13C,TP53,TXNIP,VIM	2401 (21)
5-N-ethylcarboxamido adenosine		chemical reagent		-0.84	0.00411	ADM,ARG2,BAG3,BCL3,BHLHE40,CCN2,CDKN2B,CEBPD,CHAF1B,CXCL8,DUSP16,EGR1,EPCAM,FGF2,FOXA1,GADD45A,GDNF,GSC,HIF1A,HK2,HMOX1,IER2,IFIT2,IFIT3,IL1B,IL23A,IL6,JUNB,KLF6,MMP11,NKX2-2,NOS2,NR4A1,NR4A3,NRP1,NT5E,PLK2,RAC1,RGS3,SOCS3,SRXN1,SYPL2,TGFB1,THBD,TXNIP,UBC,VCAN,VDR,VEGFA	1290 (10)
phenethyl isothiocyanate		chemical drug		1.97	0.00411	ADAMTS6,ATP6V0E1,BAK1,BBC3,BCL2L1,BIRC5,BLOC1S4,CAPN2,CASD1,CCND1,CCT4,CTTN,DUSP8,EEF2,EEF2K,ERBB2,GATD3A/GATD3B,GCLM,GOLGA7,GSS,GSTT2/GSTT2B,IFIT1,IFIT2,IFIT3,LARS1,MAP4K3,MAPK6,MCL1,MGST1,MMP2,NNMT,PCSK9,PDCD10,PLS3,PSMB3,PTPRE,QSOX1,RAB1A,RASA1,RBBP6,RPL3,RPL5,SPSB3,TGFA,TXNL1,UBE3D,UBXN4,USP14,VEGFA	1995 (16)
NPC2	-1.569	transporter		1.017	0.00412	AKR1C3,BMP2,CREB5,CTSB,IL18,IL6,MAP1LC3A,PLA2G4A,PPARG,PTGER4,PTGES,PTGS1,PTGS2,SQSTM1,STAT1,STAT2,STAT3	1292 (14)
IRAK3	-4.477	kinase		-0.155	0.00412	BCL2A1,CCN2,CD274,COL1A1,CXCL2,CXCL3,ETS2,IL6,INPP5D,IRF5,NFKBIA,NOS2,PDCD1LG2,SOD2,TGFB1,TNFAIP3,VIM	1288 (13)
methylnitronitrosoguanidine		chemical toxicant		-1.488	0.00412	BAK1,BBC3,CASP10,CCND1,CEACAM1,EGR1,FAS,GADD45A,GDF15,IRF1,KLF10,MSH2,PLAU,POLB,TP53,TP53I3,TRAIP	1543 (13)
MAPK14	-0.691	kinase	Inhibited	-3.381	0.00426	ABCA1,ACP5,ALOX5AP,ANKRD1,AREG,AXIN2,BMP2,CALR,CAT,CCNB1,CCND1,CDH1,CEBPD,COL1A1,CXCL8,DKK1,DUSP1,DUSP6,EFEMP1,EFNA1,EGFR,ELAVL1,FAS,FDPS,FGFBP1,FLT1,FN1,FOSL2,GADD45A,HAND2,HAS2,HMOX1,ICAM1,IL12A,IL18,IL1B,IL6,ITGB8,JUN,JUNB,LDLR,LEF1,MAPK14,MAPT,MEF2C,NFATC1,NGFR,NOS2,NRP1,PLAU,PLAUR,PPARGC1A,PPARGC1B,PRDX1,PSEN1,PSMD10,PTEN,PTGES,PTGS2,SGK1,SHC1,SLFN12L,SOCS3,SOD1,SOD2,SOX2,SPP1,SREBF2,TAGLN,T…	1999 (15)
SQSTM1	-0.82	transcription regulator		-0.124	0.00435	CKAP4,CXCL2,EDN1,EGLN3,HBEGF,HMOX1,IL15,IL15RA,IL18,IL1B,IL6,IRF1,JUN,KEAP1,LHX2,MAP1LC3A,NFE2L2,NFKBIA,NOS2,NQO1,PLK2,RGCC,RSAD2,RTN4,TSC22D1,UGDH	1081 (13)
salicylic acid		chemical drug		1.417	0.00435	ARC,BCL2L1,BDNF,BGN,CCN2,CDK1,CFLAR,CSF1,CSF2,CXCL8,F3,FKBP5,GDF15,IL1A,IL1B,IL6,MCL1,NOS2,OLR1,PTGS1,PTGS2,SCARB1,SLC2A4,STARD3,TGFB1,XCL1	1361 (14)
SREBF1	-0.602	transcription regulator		-0.089	0.00436	AACS,AARS1,ABCA1,ACACB,ACADS,ACLY,ACSL1,ACSL4,ACSL5,ADGRG1,AGMAT,ANKRD2,BCL2L1,BEST1,BHLHE40,BHLHE41,CAPZB,CD14,CEBPB,CEBPD,CFD,CHMP2A,COL6A1,CSRP1,CYCS,CYP27B1,DBNDD1,DHCR7,ELOVL7,ETHE1,FABP5,FABP6,FAM189B,FAS,FBXO32,FDFT1,FDPS,FN1,FOXO1,G6PD,GCK,GPAM,GPX3,GSR,HFE,HK2,HMOX1,HSD17B1,HSPA1A/HSPA1B,HSPA5,IDI1,IL12A,IL1A,IL1B,IL6,INSIG1,IRS2,KCNJ11,LDLR,LGALS3,LPL,LSS,MEF2C,MSMO1,NCF2,NOS2,NPC1,NR1H…	1843 (15)
PKM	-0.778	kinase		-0.079	0.00437	ACLY,ACOX1,BCL2L1,CCND1,CDH1,CDH2,CDKN1B,EGR1,GAPDH,GSR,HK2,IL18,IL1B,IL6,ITGB1,LSS,MMP2,NFE2L1,PC,PDHA1,PDHB,PDK1,PDK4,PKM,PPARGC1A,PRPS1,SDC2,SLC2A1,SNAI2,STAT3,TALDO1,UQCRC2,VEGFC	2489 (18)
linoleic acid		chemical - endogenous mammalian		-1.654	0.00444	ABCA1,ACADM,ACSL4,ANGPTL4,APP,BAK1,CCK,CD47,CPT1A,DUSP1,EDN1,GEMIN2,HSP90B1,HSPA5,ICAM1,IL1B,IL6,LDLR,LPL,MLXIPL,NEDD4L,NFKBIA,NOS2,OLR1,PLIN2,PPARD,PSEN1,PTGS2,RXRA,SLC2A4,SNAI2,SULT2B1,TWIST1,UCP2,VEGFA	1663 (17)
S100A9	-7.87	other	Inhibited	-2.848	0.00445	ACSS1,ALPL,APLN,AREG,BACE2,BCHE,BCL3,BHLHE40,C1S,C3,CALCB,CASP1,CCN5,CCNB1,CCND1,CCNE2,CD274,CDH3,CHDH,CPM,CSTF1,CXCL3,CXCL8,DYRK3,EFNA1,ENPP2,EPB41L4B,EPCAM,ETV5,FAS,FBLIM1,FOSL1,FURIN,GPRC5A,HEY2,ICAM1,IL1B,IL1RL1,IL6,ISG15,KLF15,LTBP1,MCF2L,MMP14,MMP2,NGFR,NOS2,NR4A3,OLR1,PDGFC,PER1,PHLDA1,PLAU,PLK3,PLXNB3,PTGES,RAB20,ROBO2,RXRG,SCUBE1,SDCBP2,SEMA3B,SGK1,SHC3,SIX1,SOCS3,STAC2,TNFAIP8,TXNIP,UGT…	1940 (17)
BMP2	-3.131	growth factor		-1.458	0.00445	ACP5,ALDH1A2,ALPL,ALPP,AMH,ATP2C2,BCL2L1,BHLHE40,BMP2,BMP2K,BMP4,BMPR2,BTC,BTG3,CAMK4,CCND1,CDH1,CDKN1B,COL1A1,COL2A1,CREB3L1,CRYM,CSF1,CXCL12,DKK1,DLX2,DLX3,DLX5,ESRRG,ETS1,EVC2,F3,FGF2,FGFR1,FN1,FOXO1,FST,GADD45B,GFRA1,HAS2,HEY1,ID1,ID3,ID4,IFI16,IGFBP5,JUN,JUNB,KLF10,KLF9,KLK7,MEF2C,MELTF,MEN1,MRAS,MSX1,MSX2,NFATC1,NFYB,NKX2-5,NKX3-2,NOTCH1,PCSK6,PITX2,PLXNA2,POU5F1,PPARG,PTGS2,RUNX2,SLC26A2,S…	2319 (20)
Firre		other		-0.846	0.00447	ACADS,ARHGAP45,CAPN1,CARMIL2,CC2D1A,CCND3,CHTF18,COTL1,DENND5B,EHMT2,FBXL15,FKBP4,GNAI2,GNB2,HIRIP3,HMGA1,INTS1,LYL1,LYPLA2,MAOA,MAP2K2,MRPL4,PALM,PEX6,POLD1,PPP1R37,PRR5,PTPN1,RBM10,RPS15,RPSA,SRC,TAGLN2,TENT5C,TRABD,TSC22D4,TTYH3,UPF3A,XIST
ARRB2	1.572	other		1.891	0.0045	ADRB2,ARRB1,ATP2A2,CTNNB1,CXCL2,CXCL3,EGR1,F3,GRK5,GSK3B,HIF1A,IL1B,IL6,JUNB,MMP2,NFKBIZ,PTGS2,STAT1,TGFB1,VEGFA	1152 (13)
GAPDH	-0.9	enzyme		1.384	0.0045	BCL2L1,CXCL1,DUSP1,ENPP1,GAPDH,HLA-C,IFI6,IFIT2,IFITM1,IFITM2,OAS1,OAS2,OAS3,PRAME,RIPK3,SLC38A2,SPP1,STAT1,TXNIP,UBE2L6	1604 (16)
JAK		group	Inhibited	-2.111	0.00453	BCL2L1,CDH2,DDX58,EIF2AK2,FBXO32,HES6,HIF1A,IFI6,IFIH1,IFIT1,IFIT2,IFIT3,IFITM3,IL6,ISG15,PTGER4,PTGS2,RSAD2,SOCS2,SOCS3,STAT1,STAT5A,VIM	1504 (14)
H2AX	-1.082	transcription regulator		0.674	0.00453	ACTB,EPDR1,EPM2AIP1,GATA4,HIF1A,MDC1,MLH1,MYL6,MYL6B,NOS2,PKM,PLEKHA6,POLRMT,PPARGC1A,PPARGC1B,RPL10A,RPL13,SLC2A1,SLC2A4,SLC7A11,TIMP3,UQCRC2,VEGFA	2300 (18)
tetradecanoylphorbol acetate		chemical drug	Inhibited	-10.355	0.0046	ABCA1,ABCA7,ABCB1,ACSL4,ACTB,ADAM15,ADAM17,ADAM8,ADAM9,ADCY3,ADM,AGTR1,AHCTF1,AHSA1,AKT1,ALDH1A3,ALOXE3,AMIGO2,ANGPTL4,ANXA1,APOBEC3B,APP,APRT,AREG,ARF1,ARHGAP32,ARID3B,ATP11B,ATP2A2,ATP2A3,AURKA,AXL,B3GNT5,BAK1,BCAR1,BCL2A1,BCL2L1,BCL3,BDNF,BIRC3,BIRC5,BLM,BMI1,BMP6,BMP7,BTC,C3,C3orf52,CA11,CA8,CACNA1B,CAMSAP1,CAPG,CASP1,CAT,CAV1,CAV2,CBS/CBSL,CCN1,CCN2,CCNA1,CCND1,CCND3,CD14,CD226,CDH1,CDK1,CDK…	2109 (15)
LATS1	0.707	kinase	Activated	2.853	0.00461	ALDH1A3,CCN2,CCNB1,CD14,CD24,CDH1,CLDN4,CYP24A1,EPCAM,ERBB2,ERBB3,FOXA1,KIT,KRT18,LATS1,RRAGD	2009 (13)
miR-22-3p (miRNAs w/seed AGCUGCC)		mature microRNA		-1.944	0.00461	AGBL5,ARID3B,ARRB1,BIN1,BMP7,CHD7,CLIP2,CYTH3,EDC3,FBXO46,FRAT2,KAT6A,MAX,MECOM,PPARA,ZCCHC14
WR 1065		chemical drug		-1.215	0.00461	CASP4,CAT,DDB2,EIF2B1,ERCC1,FAS,GADD45A,GDF15,GSR,RAD23A,S100A4,TOP2B,TP53,VEGFA,XPC,ZFP36L1	2011 (16)
CAT	0.921	enzyme		0.029	0.00464	ADM,ATG5,BAK1,BCL2A1,CAV1,CDKN1B,CFLAR,COL1A1,CXCL8,CYP1B1,FN1,HIF1A,HMOX1,HSPA4,IGF1R,IL6,MCL1,NOS2,PAX2,PMAIP1,PTGS2,TAGLN,TIMP1,TNC,TP53,VIM,XAF1,XIAP	1976 (16)
estrogen		chemical drug		-1.254	0.00474	ABCA1,AKT1,AREG,ATP5PF,AURKA,AXL,BCL3,BDNF,BMP2,BOP1,CALCB,CCK,CCN1,CCN2,CCNB2,CCND1,CCNE2,CDC25A,CDKN1B,CKB,CKS1B,COL14A1,COL18A1,COL1A1,COL3A1,COL4A2,COL5A1,COL6A2,CTSD,CXCL12,DHFR,DSCAM,DUSP1,E2F1,EGFR,EGR1,EPAS1,ERBB2,ERBB3,ESPL1,FAS,FLT1,FN1,FTH1,G6PD,GAL,GALK1,GREB1,GRIN2D,HBEGF,HIF1A,HSPH1,ICAM1,IGF1R,IGFBP2,IGFBP4,IGFBP5,IGFBP6,IL1A,IL1B,IL1RL1,IL6,IRS1,ITGA5,ITGB1,JUN,JUNB,LDLR,LGALS1,LI…	2464 (16)
POR	0.141	enzyme		-0.213	0.00475	ABCA1,ABCC3,ACADL,ACADVL,ACLY,ACSL1,ACTG1,AHR,ALDH1A2,ANTXR2,APCDD1,ARNT,ATF5,BATF3,BDH1,BTC,CAPRIN2,CHMP4C,CHRNA5,CPT1A,CPT2,CYP26A1,DHCR7,ECI1,ELOVL1,ELOVL2,ELOVL3,ETHE1,FDFT1,FDPS,FOXC1,GADD45B,GBP2,GCK,GREB1,HIF1A,HLA-A,HLF,HMOX1,HSD17B10,HSD17B11,HSPH1,IDI1,INSIG1,JDP2,LDLR,LGALS1,LPL,LSS,MAP3K6,MSMO1,MSX2,MVK,NAA80,NOCT,NRG4,PDK4,PFKFB3,PGD,PLA2G7,PNPLA7,PPARG,PRNP,RAB30,SDC4,SECISBP2L,SQLE…	745 (7)
CDK4	0.261	kinase			0.00475	AQP3,ARMCX1,ATP6V0E1,AURKA,CDC45,CDC6,CDCA7,CDCA7L,CDCA8,CDKN1B,CENPF,CENPK,CENPN,CEP55,CLPB,DHFR,DTL,E2F7,EIF5A2,ELAVL1,ENDOD1,ENPP2,FAM83D,FZD7,GAS2L3,GPALPP1,GPC6,H2AJ,HJURP,JKAMP,KIF20A,KIF20B,LINC00667,LINC00847,MAML3,MCM7,MED30,MELK,MFSD6,MYBL1,MYT1,NCAPH,NT5E,PDCD4,PDLIM3,PPCS,PTBP3,RBMS3,RNF170,SATB1,SERINC3,STARD4,STOM,TM7SF2,TMEM204,TMEM219,TMSB15A,TP53,TP53INP1,TPX2,ZNF367,ZNF423,ZNF462	2036 (19)
bucladesine		chemical toxicant	Inhibited	-2.575	0.00479	ABCA1,ABCA3,ACER2,ADGRL2,ADM,AIP,ANKRD52,ANXA1,ATP7B,AXIN2,BAMBI,BDKRB2,BDNF,CACNA1G,CCND1,CD14,CD8A,CDH2,CEBPB,CHST2,CITED4,CLCF1,CNP,COQ10B,CPT1A,CREB1,CXCL3,CXCL8,CXCR4,DMD,DUSP1,DUSP6,EGLN3,EGR1,ENPP1,EOMES,EPHA4,ERBB2,ERRFI1,ETNK1,ETV4,F3,FGFR1,FOSL1,FOSL2,FOXO1,FRRS1,FST,FSTL3,GADD45B,GALNT14,GALNT16,GCK,GDF15,GSTP1,HAS2,HHIP,HMOX1,HS3ST1,ICAM1,ID1,ID4,IGF1R,IGFBP3,IGFBP5,IGFBP6,IL1B,IL23A,…	2325 (20)
TSC2	1.66	other	Activated	3.461	0.00482	ANXA1,ANXA2,ARC,ASCL2,ATF4,ATP6V1D,AXIN2,BEX1,BIRC5,C16orf74,CASP1,CCND1,CCND3,CDKN1B,CTNNB1,DPP7,E2F1,EGR1,ERO1A,GALC,GGA2,GLA,GSN,HIF1A,HK2,HMOX1,HSPA5,HSPB1,IFITM3,IGFBP5,IRS1,IRS2,LGALS3,LGR5,MCL1,METRN,NFE2L1,NIBAN1,NKD1,PDK4,PLAU,PLP2,PRKCA,PSMB2,PSMC3,PSMD14,PTEN,S100A11,SCPEP1,SLC2A1,SMPDL3A,SNAP91,SOD2,STAT1,TAGLN,UCP2,VAMP8,ZFP36	2043 (17)
CXCR4	9.647	G-protein coupled receptor		-0.965	0.00486	AXL,CCND1,CD9,CDH1,CDH2,CHRNA7,CSF2,CTNNB1,CXCL1,CXCL12,CXCL8,CXCR4,DLX5,EGFR,EGR1,F3,GAD1,ID1,IGFBP7,IL24,IL6,JUNB,MMP2,MSX2,RRAS,RUNX2,TNFRSF10A,TP53,ZBTB16,ZEB1	2087 (17)
10E,12Z-octadecadienoic acid		chemical - endogenous mammalian		-1.14	0.00493	ACOX1,ADAM12,ADAM17,ADAM8,ALDH6A1,ALX4,APLN,ARHGEF39,ATF4,BIRC5,BOK,CACNA1G,CACNG4,CAMK2B,CASP3,CAV1,CBR3,CDK18,CDKN3,CFD,CITED1,CLIC5,CPT1A,CREB5,CXCL8,DGAT2,DLGAP5,EBF1,EXO1,GCNT4,GDF15,GLA,GPRIN3,HPCA,IGFBP3,IL1B,IL6,IL6ST,KCTD19,LDLR,LIPE,LRP1,MCM10,ME1,MFSD4B,NDC80,NPTX1,NR4A1,NR4A3,PLIN2,PLK2,PNPLA2,PPARG,PPP1R3B,PTGS2,SLC1A3,SLC2A4,SLC38A3,SMTNL2,SNCAIP,SORBS1,SOX6,SOX7,SPDL1,TK1,TRIB3,UCP…	1398 (18)
TET2	-0.929	enzyme		-1.725	0.00497	ADAM8,AFF3,AHNAK,ANXA2,BCL3,BHLHE40,CA8,CHST11,CMPK2,CTNNB1,CYP2S1,DCAF1,DDB1,EPCAM,ESRRB,FBXL5,FN1,FOSL2,FOXC1,FOXG1,GATA4,GRK5,H2AX,HS6ST1,IFI16,IFIT2,IFIT3,IFITM3,IGF1R,IL1B,IL1R1,IL6,ISL1,ITGA2,LXN,MAFF,MAP4K3,MTSS1,NCKAP1,NIBAN1,NIBAN2,NKX2-5,P2RY2,PAX6,PLS3,PPP1R13L,PXDC1,RND3,RSAD2,SEC14L1,SERAC1,SH2B3,SLC4A11,SLC6A8,SORL1,SOX2,TGFA,TGM1,TIMP1,TRIOBP,ZBTB16	1584 (12)
MYBL2	-0.089	transcription regulator		-1.786	0.00498	AURKA,BIRC3,BIRC5,CASP6,CBX4,CCNA1,CCNB1,CCNB2,CCND1,CDC25B,CDK1,CDK2,CENPE,FOXM1,GATA2,HSPA8,ID1,IGFBP5,IQGAP1,ITGB1,PLK1,PPP3CA,SLC1A5,TOP2A,UBE2C	1592 (16)
ADRA1B	-1.045	G-protein coupled receptor			0.00498	ARC,BDNF,CCND1,CDKN1B,CEBPB,CEBPD,COL3A1,CTSV,DDAH1,DUSP1,EGR1,FABP5,FN1,IL6,IL6ST,JUN,LIF,LOX,MSX2,NR4A1,PAK1,PPP3CA,PRRX1,RALA,VEGFA	1925 (16)
oxaliplatin		chemical drug	Inhibited	-2.465	0.005	AIFM1,AKT1,ANXA2,BAD,BBC3,BCL2L1,BID,BIRC5,CASP3,CCND1,CDH1,CDK5,CFLAR,EGFR,FAS,FXYD3,GDF15,H2AX,NOTCH1,PMAIP1,PSEN1,RPS6,SAT1,SQSTM1,STAT1,STAT3,TMSB10/TMSB4X,TP53,TP73,TRAIP,UGGT1,VIM	1987 (16)
25-hydroxycholesterol		chemical reagent		-1.364	0.005	ABCA1,ACLY,ACSL1,ATF4,CHAC1,CXCL8,EIF2S1,FAM189B,FDFT1,FDPS,FOSL1,FOSL2,GPX3,HMOX1,HSPA5,IL1B,IL6,INSIG1,JUN,JUNB,LDLR,MAFF,NFKBIA,NR4A1,NR4A3,PTCH1,PTGS2,SCARB1,SREBF2,STARD4,SULT2B1,TRIB3	1300 (15)
5-O-mycolyl-beta-araf-(1->2)-5-O-mycolyl-alpha-araf-(1->1')-glycerol		chemical - endogenous non-mammalian	Inhibited	-4.126	0.00507	ACSL1,BCL2A1,BCL3,CHST2,CXCL1,CXCL11,CXCL2,CXCL3,CXCL8,DUSP1,HBEGF,ICAM1,IER3,IFIT1,IFIT2,IFIT3,IFIT5,IL1A,IL1B,ITGB8,KYNU,LRP12,MGLL,NFKB1,NFKB2,NFKBIZ,NR4A3,NT5E,PCSK5,PLA2G7,PTGS2,RND3,SDC4,SERPINB2,SERPINE2,SLC7A11,SOCS3,SOD2,SPHK1,TNFAIP3	1234 (9)
IL33	-2.954	cytokine	Inhibited	-4.765	0.00511	ABCA1,ACTB,ALDH1A3,APP,AREG,ARRB1,AXL,BCL2A1,BCL2L1,BCL3,BIRC3,CALCB,CAMKK2,CASP1,CCND1,CD82,CHST11,COL3A1,CSF2,CXCL16,CXCL2,CXCL3,CXCL8,DGAT2,EHD1,ELMO1,EPAS1,FAS,FBXL21P,FLT1,G0S2,GADD45B,GNA13,GOSR2,GRK2,HACD3,HIF1A,HMOX1,ICAM1,IKBKE,IKBKG,IL15,IL1A,IL1B,IL1RL1,IL6,IRAK3,IRF5,ITGA5,JAG1,JAK2,JUNB,KLHL28,LAMA5,LEPR,NABP1,NFATC1,NFKB1,NFKB2,NFKBIA,NFKBID,NFKBIE,NFKBIZ,NLRP3,NOS2,NT5E,PDGFB,PEA15…	1949 (14)
daunorubicin		chemical drug		0.987	0.00512	ABCA3,ABCA7,ABCB1,ABCC1,ABCC4,ABCC8,BCL2L1,DPYSL4,EPS8,FOXM1,GATA4,IL1B,IL6,MCL1,SLC25A4,TAP1,TAP2,TP53,XIAP	1906 (15)
BMP		group	Inhibited	-2.433	0.00515	CCN2,ERBB3,GATA4,HAND1,ID1,IL6,IRF1,ISL1,LMX1B,MSX1,NKX2-5,PAX3,RUNX2,SPP1,WT1	1678 (16)
LRPAP1	-0.466	other		-0.231	0.00515	APP,CDH1,CXCL8,F3,IL1B,IL6,LDLR,LPL,LRP1,MAPK1,MAPK3,MMP2,PTGES,PTGS2,SORL1	1846 (18)
XIAP	-0.684	enzyme		0.461	0.00515	BIRC5,CASP3,CCND1,CDH2,CDK6,CDKN1B,COMMD1,CSF1,CXCL1,CXCL8,IL6,PTEN,PTGS2,SOD2,TXN2	1715 (15)
HSD17B4	0.054	enzyme		-0.246	0.00515	ABCD3,ACOT2,ACOX1,ACSL1,BMP2,GLI1,GLI2,HOXD13,MGLL,PDK4,PEX11A,PTCH1,PTCH2,PTGS2,SCP2	2223 (7)
SDCBP	0.493	enzyme		-0.349	0.00515	CDH1,CLDN1,CTNNB1,EGFR,ITGA6,MMP2,PEBP1,RAC1,RHOA,SNAI2,SRC,TCF4,TJP1,TP53,VIM	1670 (21)
PGF	-0.694	growth factor		-0.769	0.00518	ALOX5AP,ANGPTL4,BIRC2,BIRC5,CASP1,CASP7,CDK1,CXCL8,CXCR4,E2F2,EDN1,EGR1,ETS2,FLT1,FST,HIF1A,IL1B,IL6,JAK2,KIT,MAP4K4,NRP2	1941 (18)
POSTN	4.761	other		-0.683	0.00518	ALPP,ATF4,CDH1,EGFR,FN1,HEY1,HEY2,LOX,LOXL1,LOXL2,LOXL3,MEF2C,MMP2,NOTCH1,PDGFA,PDGFB,PHEX,RUNX2,SPP1,TGFB1,VEGFB,VIM	2039 (20)
ANXA1	-6.107	enzyme	Activated	2.113	0.00518	AKT1,ANXA1,ANXA2,ANXA4,CDH1,COL18A1,CSF1,CXCL2,CXCR4,FARSA,IL1B,IL6,ITGB1BP1,MMP2,NOS2,PLA2G4A,PLAU,PTGS2,SPHK1,TIMP2,TSC22D3,TYMP	1358 (12)
zoledronic acid		chemical drug		0.059	0.00518	BCL2L1,BID,CCN1,CDH1,CXCL8,CXCR4,DKK1,FLT1,FZD5,IL6,IRAK3,LPAR1,MMP2,NCAM1,PAK1,PTGS2,RUNX2,SPARC,TNFRSF11A,TP53,VEGFA,WNT5A	1682 (16)
benzyl isothiocyanate		chemical - endogenous non-mammalian		1.463	0.00518	AIFM1,BAK1,BCL2L1,BIRC5,CCNB1,CCND1,CDH1,CDK1,CDKN1B,EGFR,GSTP1,ICAM1,MCL1,MET,MMP2,MST1R,NOS2,PTGS2,SP3,STAT3,ZBTB10,ZBTB4	2245 (19)
eflornithine		chemical drug		-0.938	0.00518	AKT1,APP,C3,CCNE2,CDH1,CDK1,CDK2,CDKN1B,CDKN2B,CTNNB1,DHFR,FN1,HLA-B,IL32,LGALS3,LGALS3BP,PLK1,PSAP,RB1,SHC1,SOD2,TGM2	2600 (20)
REL	-0.428	transcription regulator	Inhibited	-2.333	0.0052	ACAD9,ACSL4,ADK,AGA,AHR,ANLN,APP,ATP11A,B2M,BBC3,BCL2A1,BCL2L1,BCL3,BIRC5,CCND1,CD59,CDC6,CDH1,CDS2,CMPK1,COPS4,COTL1,CSF2,CTSV,CTU2,CXCL8,DHFR,DNAH1,E2F3,EPHB2,ETV5,F3,FAS,FN1,FOSL1,GADD45B,GPT2,H2AJ,HBEGF,HLA-A,ICAM1,IER3,IL12A,IL18,IL1B,IL23A,IL6,IRF5,IRF6,IRF8,JUN,JUP,KAT6A,KPNA3,MAP3K8,MAPKBP1,MED12L,MLLT3,NAB2,NFATC1,NFE2L2,NFKB1,NFKB2,NFKBIA,NFKBID,NOS2,NR4A1,NR4A3,NRARP,PHGDH,PIBF1,PIK3CA…	1769 (15)
MLXIPL	3.371	transcription regulator	Activated	5.157	0.00523	ACACB,ACLY,CPT1A,GCK,GPAM,HIF1A,KHK,MID1IP1,MLXIPL,PGD,PPARA,PYGL,RPL10A,RPL11,RPL12,RPL13,RPL14,RPL15,RPL18,RPL18A,RPL21,RPL24,RPL27,RPL27A,RPL3,RPL31,RPL39,RPL4,RPL5,RPL6,RPL7A,RPL8,RPLP2,RPS11,RPS12,RPS13,RPS14,RPS15,RPS15A,RPS18,RPS19,RPS19BP1,RPS2,RPS20,RPS21,RPS24,RPS28,RPS3,RPS6,RPS8,RPS9,RPSA,SCAP,TXNIP
norepinephrine		chemical - endogenous mammalian		-1.37	0.00529	ABCA1,APP,ATP2A2,ATP7B,BDNF,CACNA1G,CCN2,CEBPB,CHST2,CITED4,COQ10B,CRY1,CXCL8,CXCR4,DUSP1,EDN1,EGR1,ELOVL1,ELOVL3,EOMES,ETNK1,FGF2,FN1,FOSL2,FST,FTH1,GALNT14,GDF15,GMNN,GRK3,GRK5,HHIP,HILPDA,HMOX1,ID1,IGF1R,IL12A,IL1B,IL6,IRS2,KCTD3,MAN2A1,MCAM,MMP2,NAP1L5,NFKBIA,NOS2,NPY1R,NR4A1,NR4A3,PCDH1,PDE10A,PDE4D,PER1,PLAGL1,PPARG,PPARGC1A,PTCH1,PTGES,PTGS2,PTPN21,SGK1,SLC2A1,SLC2A4,SLC6A17,SMAD7,TBC1D1,T…	1055 (12)
CEBPB	-1.648	transcription regulator	Inhibited	-3.65	0.0053	ABCB1,ADM,AKR1C3,ALDH1A2,ALOX5AP,APCDD1,APLN,APP,ARPP19,ATR,B9D1,BCL2A1,BCL2L1,BDNF,C3,CCNB2,CCND1,CD14,CDC25A,CDC25B,CDC42EP3,CDC45,CDC6,CDH3,CDKN1B,CDKN2B,CDT1,CEBPB,CEBPD,CFD,COL1A1,CPT1A,CSF1R,CTNNB1,CTSC,CXCL2,CXCL3,CXCL8,CXCR4,CYP24A1,CYP27B1,DAPK1,DDB2,DEGS1,DGAT2,DHCR7,DHFR,DHRS1,DHX9,DLX3,E2F1,E2F3,EDIL3,EFNB2,EPHA7,F8,FAS,FBXO32,FHL1,FHL2,FTL,GADD45A,GAS1,GLIPR2,GSK3B,HAS2,HLA-A,HMGA1,H…	2278 (20)
INSIG1	1.604	other		0.682	0.0053	AACS,ABCA1,ACACB,ACLY,ACSL4,ALOX5AP,CLEC7A,CXCL2,CXCL3,CXCR4,DHCR7,ELOVL1,FABP5,FDFT1,FDPS,G6PD,GPAM,IDI1,IL6,IRF8,IRS2,LDLR,LIPA,LIPG,LPL,LSS,MLXIPL,MVK,NFKBIZ,OLR1,PDX1,PLA2G7,PLIN2,PPARG,PTGES,PTGS1,RAB27A,SCAP,SCARB1,SQLE,SREBF2,STARD4,STAT5A,TGFB1,TM7SF2,UCP2,VNN1	1155 (7)
medroxyprogesterone acetate		chemical drug		-0.46	0.00553	ABCB10,ANLN,BCL2L1,BDNF,BIRC5,BRIP1,C15orf48,CAMK4,CASP3,CCN1,CCNB1,CCNB2,CCND1,CDK1,CDKN1B,CENPF,CLDN1,CXCR4,CYSTM1,DEPDC1,DLGAP5,DNMT3B,ENPP2,ERBB2,ETS1,F3,FAS,FGF2,FN1,FOXO1,HES6,HTRA1,HTRA3,ICAM1,IFI35,IGFBP7,IL12A,IL15,IL18,IL1A,IL1B,IL6,ITGB1,JUN,JUNB,KIF18A,KLF5,LMNA,MCM5,MPZL2,NCAPG,PLAAT4,PLAU,RANBP1,REEP1,ROBO1,S100A11,SAMHD1,SGK1,SP3,TFPI2,TGFB1,TNC,TWIST1,VCAN,VEGFA,WNT4,WNT5A	2775 (21)
MAP2K4	-0.251	kinase		-1.624	0.00557	BCL2L1,BIRC3,BIRC5,CCND1,CFLAR,CXCL8,EGFR,ERRFI1,FAS,FLNA,GADD45A,IL6,JUN,MAPK8,MEF2C,NOS2,PAK1,PAK2,PLA2G4A,PLAU,PPARD,PPARG,PRDX1,PTGS2,STAT3,TGFB1,TP53,VDR,XIAP	1595 (16)
GPER1	-2.368	G-protein coupled receptor	Inhibited	-3.414	0.00557	ASAH1,BHLHE40,CCN1,CCN2,CCND1,CEBPD,DUSP1,DUSP4,DUSP5,EDN1,EGR1,ERRFI1,ESRRA,HSPA5,IER2,ITPRIP,JUN,MT1F,MT2A,MYH10,NFKBIA,NOP58,NOTCH1,PTGER4,SLC1A1,TAGLN,TNFAIP3,TUFT1,ZFP36	2723 (18)
PTK2	-0.246	kinase	Inhibited	-2.339	0.00557	BIRC2,BIRC3,CCN1,CCND1,CDKN1B,COL1A1,DSP,FN1,GATA4,IL6,IRS1,ITGA5,KRT18,KRT8,LDLR,LPP,MMP2,OCLN,PALLD,PRRX1,PTK2B,SERPINB1,SPP1,TIMP1,TIMP3,TJP1,TNC,TP53,XIAP	2162 (18)
ELL2	-2.226	transcription regulator	Inhibited	-2.414	0.00557	CCPG1,CNST,CRELD2,CYP26A1,DNAJB9,DNAJC3,EDEM2,FNDC3A,FNDC3B,FUT8,HDLBP,HM13,LMAN1,MAN1B1,MANF,PON3,PRDM1,RAPGEF3,REXO2,SDC1,SEC24D,SEC61A1,SEL1L,SPCS1,SRPRA,TENT5C,TMEM154,TRIB1,XBP1
docosahexaenoic acid		chemical drug		0.867	0.0056	ABCA1,ABCD3,ACOX1,ALPP,APP,ATF4,BAD,BCL2A1,BCL2L1,BDNF,BID,CASP8,CCN2,CDKN1B,CEBPB,COL1A1,CPT1A,CSF1,CXCL8,CXCR4,CYCS,DNAJB9,ELOVL2,FAS,FOXO1,GDNF,HDAC7,HMOX1,IL1B,IL6,INSIG2,LDLR,LOX,LOXL1,LOXL2,LOXL3,MAPT,MFN2,MLXIPL,MMP2,NFE2L2,NFKB1,NOS2,PIK3R1,PLA2G4A,PLTP,PNPLA2,POU5F1,PPARA,PSEN1,PTAFR,PTEN,PTGES,PTGS1,PTGS2,RAF1,RXRA,SAA1,SDC1,SERPINH1,SMAD7,SMPD1,SMPD2,SOCS3,SORL1,SPHK1,TGFB1,TGFB2,TGFBR…	1385 (14)
SNCA	0.327	enzyme	Inhibited	-2.12	0.0056	ABLIM3,ARHGEF28,ARHGEF4,BAIAP2,BCL11B,BCL2L1,BDNF,BTC,CABP1,CAMKV,CARMIL1,CASP3,CCBE1,CCDC80,CCK,CDC42EP3,CDH13,CDHR1,CFL1,CHMP4B,COLGALT2,CRYM,CTHRC1,CTSB,DGKG,DHRS3,DNAJB9,DNAJC12,DNM1,EFNA1,EGFR,EP300,EPS8,ERC2,EZR,FGF13,FUZ,GBP2,GDA,GDNF,GLDC,GLO1,GNG4,GRIN2D,GRIP2,GSK3B,GSN,HOMER2,HPCA,HSBP1,HSP90B1,HSPA5,ICAM5,IDS,IL13RA1,IL1B,IL6,IRF1,IRF7,ISG15,JPH2,KCNG1,KCNJ11,KIF1A,KIFC1,LAMP2,LHX2,LMO…	2349 (20)
TCF3	0.043	transcription regulator		-0.106	0.00563	ABCC8,ACACB,ADA,ALCAM,ANLN,ANXA6,ARSA,AURKA,AXIN2,BID,BIK,BIRC5,C15orf39,CASP3,CASP6,CCDC117,CCNB1,CCNB2,CCND3,CCNE2,CDC25B,CDC45,CDCA3,CDH1,CDH5,CDK1,CDK6,CDKN2B,CDKN3,CEP55,CERK,CGREF1,CHRNA5,CKAP4,COL1A1,CRELD2,CSF1R,CTSE,CTSV,DAB2IP,DCK,DDX58,DSTN,EBF1,ECT2,EIF4EBP1,ENPP1,EPCAM,EPRS1,ETS2,FGFR3,FOXO1,GADD45A,GADD45B,GATA2,GFI1,GM2A,GNE,GPAM,GPLD1,H2AX,HAND1,HS3ST1,HSP90B1,HYOU1,ID3,IFI16,IL1B…	2355 (22)
TGFBR1	0.402	kinase		-1.006	0.0057	AHR,ALX1,BGN,BHLHE40,BIRC5,BMP4,CCN2,CCND1,CDH1,COL1A1,DOCK4,EDN1,FBLN5,FGF9,FN1,FURIN,GAS1,HAS2,HEY1,HMOX1,ID4,ITGB5,JAG1,LTBP1,MST1R,PDGFB,PDK4,PIGF,PTPRK,RGS3,RUNX1,SLC5A5,SMAD7,SNAI2,TAGLN,TWIST1,VEGFC,VIM,WNT11,WNT9A,ZFP36	2034 (16)
NEDD9	-1.708	other	Inhibited	-2.93	0.0057	ACSS3,ADM,ALOXE3,ANKRD37,APP,ARMC4,AURKA,BHLHE40,BMP2,CA9,CACNA1G,CDH1,ELF3,ERRFI1,FHAD1,GALNT14,GDF15,ITGA2,KIT,LIN7A,LRP1,MACROD2,MAL2,MMP14,MMP2,NAAA,NRN1,OVGP1,PFKP,PLAC8,PLIN2,PLOD2,PPP1R3B,PPP2R2C,RPGR,SLC1A1,SLC2A1,TBX2,TUBA1A,TXNIP,VIM	1338 (17)
Irgm1		other	Activated	4.088	0.00571	CCNB1,CCNB2,CDCA3,DTL,FAS,GRN,ID3,IFI16,IFIT2,IFIT3,IL6,IRF7,KIF20A,MKI67,NCAPG,OAS2,OASL,RRM2,RSAD2,SPAG5,SQSTM1,STIL,TK1,UBE2C	1180 (11)
HTATIP2	-0.315	transcription regulator		1.937	0.00572	ADGRB1,CCND1,CDH1,CDH2,DDB2,EGFR,MMP2,PKM,POU5F1,SOX2,SPARC,SPP1,TP53,VEGFA	2004 (20)
IREB2	0.742	translation regulator		1.341	0.00572	ACO2,APP,CYCS,EPAS1,FTH1,FTL,FXN,HIF1A,HK2,ISCU,PFN2,SLC2A1,TFRC,TP53
TICAM1	-3.596	other	Inhibited	-6.503	0.00573	ACSL1,AK3,APOBEC3B,BCL3,CASP4,CEBPD,CFLAR,CMPK2,CXCL11,CXCL2,CXCL3,CXCL8,DDX58,DUSP1,EGR1,ETS2,FAS,GDF15,GRN,ICAM1,ICOSLG/LOC102723996,IFI16,IFIT1,IFIT2,IFIT3,IKBKE,IL12A,IL15,IL15RA,IL18,IL1A,IL1B,IL23A,IL6,IRF1,IRF3,IRF7,ISG15,ISG20,JAG1,LPAR1,LZTFL1,MAFF,MET,MKI67,NFKB1,NFKB2,NFKBIA,NFKBIZ,OASL,PTGS2,RELB,RHOB,RIPK2,RSAD2,SAMHD1,SLC7A2,SOCS3,TLR2,TLR3,TNFAIP3,TSC22D1,ZC3HAV1	1309 (14)
atorvastatin		chemical drug		0.813	0.00577	ABCA1,ABCB1,ABCB4,ABCC1,ABCC3,ALPP,ARRB1,BCL2L1,BDNF,BMP2,BMP6,CAT,CAV1,CCBE1,CCN1,CCN2,CCNE2,CD59,CDKN1B,COL1A1,CRCP,CXCL8,CXCR4,DDX51,DHCR7,DKK1,DMC1,DUSP1,EDN1,EGR1,ELF3,ENG,F3,FDFT1,FDPS,FLT1,GADD45B,GJC1,GPAM,GSR,HMGB1,HMOX1,HSD17B7,ICAM1,IDI1,IER3,IL17RD,IL6,JUN,JUNB,LDLR,LIPG,LPL,LSS,MAP1LC3A,MAPK1,MAPK3,MCMDC2,MMP2,MSMO1,MVK,NOS2,NR1H2,NR1H3,NR4A1,OLR1,PCSK9,PPARG,PRNP,PTGS2,RAC1,RHOA,RHO…	1382 (13)
cobalt chloride		chemical reagent		-1.317	0.00578	ABCB10,ADM,BBC3,BDNF,BHLHE40,BHLHE41,CA9,CD274,CDX2,COL18A1,CXCL8,CXCR4,CYP1B1,DUSP1,E2F1,EPAS1,FLT1,HIF1A,HMOX1,IREB2,MCL1,MEF2D,MITF,NCOA2,PKM,PLAUR,PTGS2,SLC1A1,SLC1A3,SLC2A1,SLC40A1,SORL1,SPHK1,TFRC,TJP1,TP53,VEGFA,WT1,ZNF667	2101 (17)
mir-193	-0.36	microRNA		1.76	0.00581	ACTN4,CD2AP,ERBB4,FAT1,INF2,KIT,MAPT,MCL1,MIR31HG,MYO1C,NOTCH1,PLAU,PTEN,STMN1,SULF1,SYNPO,VEGFA,WT1	1823 (12)
NUP98-HOXA9		fusion gene/product			0.00581	ATRNL1,EYA1,HEY1,HOXA10,HOXA9,HOXB3,HOXB5,HOXB6,HOXB7,HOXB8,HOXC8,LOC101929709,MSI2,PBRM1,PTGS2,SORBS2,TLE4,VANGL2
Sb202190		chemical - kinase inhibitor	Activated	2.237	0.00586	ABCB1,ANGPTL4,BIRC5,CCN2,CCND1,CCND3,CDH2,CEBPB,COL1A1,CSF2,CTNNB1,CXCL8,DGKA,DKK1,EGR1,FN1,HIF1A,HMOX1,HRK,HSPA5,ICAM1,IFIT1,IL12A,IL18,IL1B,IL23A,IL6,JUNB,LDLR,MAP1LC3A,MAPK6,MAPK8,MMP2,NOS2,PDX1,PHLDA1,PLA2G4A,PPARA,PPARGC1A,PPARGC1B,PRDX1,PTGS2,PTHLH,RB1,RHOB,SCN9A,SGK1,SNAI2,TGM1,TIMP2,TNFRSF10A,TP53,TYMP,VDR,VEGFA,VIM,XDH,ZEB1	1387 (13)
mir-155		microRNA	Activated	2.245	0.00591	ADAM10,AGTR1,ANXA2,CCND1,CD47,CEBPB,CLDN1,CXCL8,DHX40,DUSP5,EDN1,EGFR,GCSAM,HIF1A,HK2,HMOX1,IFIT3,IKBKE,IL13RA1,IL1B,IL6,IL7,INPP5D,IRAK3,IRF7,IRF8,IRF9,JARID2,MAF,MLH1,MME,MSH2,MSH6,MX1,MYD88,NOS2,NUP153,PDCD4,PPARG,PTEN,PTGS2,RICTOR,RORA,SMAD2,SOCS3,STAT1,STAT3,TGFB1,TP53,TP53INP1,TRIM32,WEE1,YWHAZ	2187 (20)
NOX4	-2.023	enzyme	Inhibited	-2.495	0.00593	BCL2L1,CDH1,CTH,CXCL8,EPAS1,FN1,H2AX,HAS2,HIF1A,ICAM1,KIT,MCL1,MMP2,POU5F1,RHOA,RHOC,SLC2A1,TGFA,TJP1,TP53,VEGFA	1416 (15)
NS-398		chemical reagent	Activated	2.424	0.00602	ALPL,BIRC5,BMP2,CAPN2,CASP3,CCNB1,CCND1,CDKN1B,CEBPB,CXCL8,CXCR4,F3,FAT1,FGF2,GATA6,HIF1A,ICAM1,IL1A,IL1B,IL24,IL6,MAGI1,MCL1,MMP14,MMP2,NOS2,PCDH7,PDCD4,PPARG,PRDX1,PSMB8,PSMB9,PTGES,PTGS1,PTGS2,RECK,RUNX2,SAA1,SERPINB2,SPP1,TFPI2,TFRC,TP53,VEGFA,WNT10B,XRCC6	1980 (16)
HSPA5	-0.686	enzyme		-0.49	0.00611	ACADM,ACADVL,ACLY,APP,BCL2L1,BCL2L2,BIRC5,CASP3,CD47,CDH1,CPT1A,EGFR,HSP90B1,HSPA5,HSPA8,IDI1,IFIT1,IL6,ISG15,MBP,NQO1,P4HB,PTEN,SREBF2,WASF3,XBP1	1321 (18)
RPS15	0.779	other			0.00611	CDC45,EIF2S1,EIF2S2,EIF3G,EIF3I,EXOSC2,EXOSC4,EXOSC5,EXOSC8,IGF2BP1,MCM3,MCM5,MCM6,MCM7,PDCD4,POLD1,PTEN,RPA2,RPS11,RPS13,RPS15,RPS19,RPS24,RPS4X,RPS6,RPS9	754 (6)
EHF	-7.17	transcription regulator		-1.744	0.0062	ANGPTL4,ARNT,BMP4,CASP3,CCBE1,CDH3,CDK1,CDKN1B,COL2A1,CRABP2,CSF2,E2F1,ERBB2,GATA2,GPR68,GRHL3,HMOX1,IL6,JAG1,KIT,KLF5,KLK5,KLK6,KLK7,LYN,MET,NOTCH2,PLAUR,PPARD,RARB,SAA1,SCEL,SPRR2A,SPRR2D,TCF4,TFPI,TGFB1,THBD,TIMP1,TNC,VEGFA,VEGFC,VNN1,ZFP36L1	1220 (7)
CD36	1.854	transmembrane receptor	Inhibited	-3.702	0.0062	AREG,ATP2A2,ATP5F1B,AXL,BTC,COL1A1,COL4A1,CSF2,CXCL1,CXCL3,CXCL8,DGAT1,FAS,FGF2,HSPA5,ICAM1,IGF1R,IGFBP4,IGFBP6,IGFBP7,IL11,IL15,IL1A,IL1B,IL6,IRAK1,IRAK4,LIF,LPL,LRP1,MMP14,NLRP3,PDGFB,PLAU,PLAUR,PNPLA2,PPARG,PPARGC1A,SERPINB2,SLC2A4,SYK,TGFA,TNFRSF10A,XBP1	2026 (15)
ABT-737		chemical drug	Inhibited	-2.228	0.00631	BCL2A1,BCL2L1,BCL2L10,CEBPB,CXCL2,CXCL8,GADD45A,IL11,IL6,IRF1,MCL1,PMAIP1,TP53	1929 (15)
EDN3		other		-1.247	0.00631	CCND1,CDH1,CDH2,CDKN1B,CTNNB1,CTNND1,EGR1,FGF2,ITGA2,ITGA5,ITGB1,LAMA1,MCAM	1628 (18)
ACKR1		G-protein coupled receptor			0.00631	BDNF,ICAM1,IFI16,MYO5A,NINJ1,PRDX6,SIK1/SIK1B,STAM2,TBC1D8,TNFAIP2,TNFAIP3,TNKS,ZBTB18
CDK8	0.508	kinase		0.455	0.00631	ANKRD37,CTNNBIP1,CXCL1,CXCL2,CXCL8,CXCR4,MAGI1,NOTCH1,RARB,RBL1,STC2,TP73,UHMK1	2245 (18)
HMGA2	-0.97	enzyme		1.941	0.00631	BCL2A1,CXCR4,HOXD9,IGF2BP2,IL15,KLF15,LPL,SCNN1A,SNAI2,SOX2,SPP1,TERT,TWIST1	1502 (12)
acetaldehyde		chemical - endogenous mammalian		-1.009	0.00631	CEBPB,COL1A1,DDR2,IL6,JUN,KLF9,MMP2,PPARA,PPARG,SIRT1,SMOX,TGFB1,TIMP1	1121 (14)
POU2F2	0.286	transcription regulator		-1.141	0.00635	ADA,ARG2,ASB13,BANK1,BBC3,CCDC28B,CFLAR,COCH,CXCR5,DACT3,DIXDC1,EBF1,EIF2S2,ELL2,FRMD4A,GATM,GGA2,HNF1B,IL12A,JUN,KCNN4,LCK,MCM7,MMAB,MOCOS,MVK,NOS2,PFKFB3,PLEKHG1,RPS2,RYR1,SIRT3,SPP1,SSTR2,STAT3,TERT,TGFA,TIMP2,TNFAIP2,TNFRSF12A,TNFRSF21,XBP1	803 (7)
cocaine		chemical drug	Inhibited	-2.896	0.00648	ADCY1,ARC,ATP5F1B,BDNF,BHLHE40,CACNA2D1,CDK5,CDKN1B,CLOCK,CLSTN1,CPT1A,CPT2,CREB1,CTU2,CXCL2,CXCL8,DDB1,DNMT3B,DUSP1,DUSP14,DUSP5,EFNB2,EGR1,FGF2,FHL2,FOSL1,FOXO1,FRMD6,GABRB3,GADD45A,GADD45B,GNAI2,GNB1,GPSM1,HOMER1,HSPA4,ICAM1,IFIT1,IL6,IRS2,JUN,JUNB,KCNC1,KLF5,MAPK1,MAPT,MBD1,MCL1,MEST,MIDN,MX1,NAB2,NACC1,NFKB1,NFKB2,NOS2,NPTX2,NR4A1,NR4A3,NRDC,NTS,OAS1,PARP1,PDGFB,PER1,PITHD1,PITPNA,PPFIA3,PRD…	1629 (20)
gentamicin		chemical drug	Inhibited	-2.474	0.00648	ACADM,ACADSB,ALCAM,ALPL,ARF6,ASL,ATP6V1D,AZIN1,BTG3,CALR,CBS/CBSL,CCNG1,CCNL1,CD9,CDC34,CEBPB,CHKA,CHORDC1,CIPC,CNKSR3,CTSD,CTSV,DECR1,DECR2,DMD,DNASE1,EAF1,EGR1,EIF2B4,EIF3D,ENPP2,GADD45A,GATM,GDF15,GFER,GHR,GNL3,H2AX,H3-3A/H3-3B,HIVEP2,HMOX1,HNRNPU,HSP90B1,HSPA1A/HSPA1B,HSPA5,HSPB1,HYOU1,ICAM1,IFRD1,IGFBP3,IL1B,IRF1,IRF7,JUN,JUNB,KLF6,KYNU,LIG4,LITAF,MAF,MAPK6,MCM6,MPST,MRPL23,MYBBP1A,NEURL3,NO…	2157 (17)
H1-6	3.474	other		0.949	0.00649	ABCG4,AGTR1,ARPC5,ATP6V0E2,B2M,B4GALT5,BCAR1,BCL3,CANT1,CD81,CDC6,CSTF1,DOT1L,DUSP16,FARP1,FDPS,FKBP4,GPM6A,HAND1,HIRIP3,HSPA4,ICOSLG/LOC102723996,KIF21B,MANBA,MAST1,MCM6,METTL22,OGT,PARVA,PHB2,PHC3,PHLDA1,PPFIA3,RNF113A,RRM1,SERINC3,SF3A1,SGF29,TEX2,TMEM230
H1f1		other		0.949	0.00649	ABCG4,AGTR1,ARPC5,ATP6V0E2,B2M,B4GALT5,BCAR1,BCL3,CANT1,CD81,CDC6,CSTF1,DOT1L,DUSP16,FARP1,FDPS,FKBP4,GPM6A,HAND1,HIRIP3,HSPA4,ICOSLG/LOC102723996,KIF21B,MANBA,MAST1,MCM6,METTL22,OGT,PARVA,PHB2,PHC3,PHLDA1,PPFIA3,RNF113A,RRM1,SERINC3,SF3A1,SGF29,TEX2,TMEM230
Wnt		group		0.956	0.00656	ADAM10,CD24,CDH1,CDH2,CDX2,CTNNB1,EGFR,GATA4,GLI1,GSC,HAND2,LEF1,MSX1,PAX3,PITX2,PPARG,PPARGC1A,RUNX2,SDC2,SIX1,SOX9,TFAP2A,TLX3	2209 (25)
ST6GALNAC1	-5.582	enzyme		1.039	0.00657	B2M,CDH1,CDH2,CTNNB1,SNAI2,VIM
C1orf61	3.288	other		0	0.00657	CCND1,CCND3,CDH1,CDK2,OCLN,VIM
TCIM	3.856	other	Inhibited	-2.415	0.00657	CXCL1,CXCL8,ICAM1,IL1A,IL6,PTGS2	961 (10)
SERPINC1	0.502	enzyme		0.114	0.00657	F3,HSPG2,IL6,MAPK3,MIF,NOS2	1574 (13)
TRPV2	0.116	ion channel		-0.128	0.00657	AKT2,BCL2L1,CASP8,E2F1,FAS,RAF1
CBR3-AS1	-2.904	other		-0.028	0.00657	CCND1,CDH1,CDH2,ERBB2,TGFB1,VIM	1206 (7)
miR-139-5p (miRNAs w/seed CUACAGU)		mature microRNA		-0.371	0.00657	FOXO1,IGF1R,KIT,MMP11,RUNX1,SHC1
miR-197-3p (and other miRNAs w/seed UCACCAC)		mature microRNA		0.935	0.00657	ACVR1,CTNND1,IL6,TGFBR2,TSPAN3,TUSC2
G3BP1	-0.132	enzyme		0.808	0.00657	DDX58,LEF1,MSX1,MSX2,SOX2,SPP1
PROK1	4.109	growth factor			0.00657	CCN2,CXCL8,IL11,MCL1,PTGS2,SPHK1	1508 (15)
MAD2L2	0.773	enzyme		-0.592	0.00657	CDH1,CDH2,EGR1,POU5F1,SNAI2,VIM	1619 (15)
TNKS	0.736	enzyme		-0.765	0.00657	AXIN1,AXIN2,MCL1,RAB10,SLC2A4,SORT1	1379 (7)
FBLN5	3.618	other		1.067	0.00657	CCNA1,CDH1,MMP2,SERPINA1,TGFB1,TWIST1	776 (7)
butylidenephthalide		chemical reagent		-0.073	0.00657	AXL,CDH2,MMP2,SNAI2,TWIST1,VIM	788 (7)
Boc-D-FMK		chemical reagent		-1.3	0.00657	CDKN1B,CXCL8,JAK2,RB1,RBL1,SYK
sunitinib		chemical drug	Activated	2.021	0.00658	BAK1,BBC3,BIRC5,CCN2,CCND3,COL4A2,COL5A1,COL6A1,COL7A1,COL8A1,CTNNA1,CTNNB1,CXCL3,ECM1,FN1,ICAM1,ITGA1,ITGA3,ITGA4,ITGA6,ITGA8,ITGB1,ITGB5,LAMA3,LAMB1,LAMC1,MET,RUNX1,TIMP2,TNC	1734 (17)
SCD	1.744	enzyme		1.073	0.00658	ABCA1,ACACB,ACADL,ACADVL,ACOX1,ANGPTL4,CEBPB,CPT1A,CXCL3,CXCL8,DGAT1,GADD45A,GPAM,HSPA5,IL1B,IL6,LIPE,LPL,NOS2,PEMT,PPARD,PPARGC1A,PRDM16,PTPN1,SLC25A14,SLC2A1,SPTLC1,SPTLC2,UCP2,XBP1	1569 (16)
ELK1	0.207	transcription regulator		-1.732	0.00658	ARRB2,BCL2L1,BMP2,BMPR2,CCT8,CDKN1B,EGR1,FOSL1,GRK2,INSIG2,ITGAV,ITGB1,JAM2,JUN,JUNB,KATNB1,MCL1,MECOM,MUC4,PRKCA,PTGS2,RUNX2,SLC2A1,SLC7A11,SPP1,TAGLN,TERT,TIPARP,TPD52L1,ZFP36	2563 (24)
GAST	-3.131	other		-1.089	0.0066	ANXA7,ARCN1,AREG,ATF4,CCND1,CTNNB1,EGR1,HBEGF,HCFC1,HNRNPDL,IMPDH2,JAG1,JAK2,JUN,MAPK1,MCM3,MDH2,NACA,NARS1,NFKBIA,PDHX,PDX1,PIK3R1,PLA2G7,PPARG,PRDX3,PTGS2,RAC1,RHOA,RPS19,SERPINB2,SIK1/SIK1B,SLC9A3,SRC,STAT3,TGFA,TNC,WASF1	1667 (18)
TCF7L1	-0.983	transcription regulator		-1.006	0.0066	AXIN2,EOMES,ESRRB,FGF5,JAM2,JUN,KIT,NKX2-5,NR5A2,NR6A1,PORCN,PPARG,PYCR2,SLC26A2,TBX3,TFCP2L1,TNFRSF19	2206 (14)
RPSA	1.186	translation regulator	Activated	2.259	0.0066	CSF2,CXCL3,DUSP1,GBP3,GBP4,IL1A,IL1B,IL1R1,IL6,ISG15,ITGA6,MMP2,NOS2,PTGS2,RELB,STAT1,TAP1	1990 (15)
R-WIN 55,212		chemical reagent	Activated	2.456	0.0066	CASP3,CASP6,CASP7,CCND1,CDK2,CDK6,CDKN1B,CXCL8,E2F1,E2F2,E2F3,ICAM1,IL1B,IL6,RB1,TFDP1,TP53	1646 (15)
GW501516		chemical drug		0.358	0.00661	ABCA1,ACADL,ACADM,ACSL1,ACSL4,ANGPTL4,CAT,CCND1,CFD,COL5A1,COL6A1,CPT1A,CYP24A1,DECR1,F3,FGFR1,FLT1,IGFBP2,IGFBP3,IGFBP5,IGFBP6,IL1A,IL1B,IL36G,IL6,KLK6,LIPE,LIPG,LPL,NOTCH1,PDK4,PLAC1,PLIN2,PPARA,PPARD,PPARGC1A,PPL,PTEN,SAA1,SERPINB2,SNCG,SOD1,SULT2B1,TP53,UCP2,VEGFA,VNN1	1776 (20)
MUC1	-1.715	other		-0.189	0.00667	ABCC1,BAD,BCL2L1,CAT,CCND1,CDH1,CDKN1B,CHEK1,CTNNB1,CXCL2,CXCL8,DNMT3B,EGLN3,HIF1A,IFIT3,IFITM1,IKBKB,IL6,MGST1,MKI67,NFKBIA,NRP1,OASL,PDGFA,PLAU,PYCR1,SNAI2,SOD1,SOD2,STAT1,TERT,VIM	2389 (21)
lysophosphatidylcholine		chemical - other		-0.765	0.0067	ABCA1,CAT,CD274,CSF2,CXCL1,CXCL8,DHCR7,EGR1,F3,FABP5,FDFT1,HBEGF,ICAM1,IL1B,IL6,INSIG1,JUN,LDLR,LPL,LRP1,LSS,MBP,MSMO1,MVK,NOS2,OLR1,PLAU,PLAUR,PPARG,SCARB1,SQLE,SREBF2,TM7SF2,TNFSF15	1877 (18)
entinostat		chemical drug		-0.357	0.0067	ARC,ASCL2,BAD,BAK1,BBC3,BCL2L1,BIK,BIRC5,CCND1,CDKN1B,DUSP1,EGFR,ERBB2,ERBB3,GSN,GUCY1B1,H2AX,HDAC7,HIF1A,IGFBP3,LGR5,MCL1,MICB,MMP2,NFE2L2,PMAIP1,RB1,RUNX2,TGFBR2,THBS2,TNFRSF10A,TNFRSF19,TP53,XIAP	2199 (18)
gemfibrozil		chemical drug		-1.292	0.0067	ACADL,ACADVL,ACOT2,ACOX1,ANXA7,APP,BMP7,CCND1,CHEK1,CNP,CPT1A,CPT2,DECR1,DECR2,ECI1,FGB,FURIN,GADD45A,IL1B,IL6,LDLR,MBP,NBN,NFKBIA,NOS2,NR1H3,PCSK5,PCSK9,PDCD4,PPARD,PPARG,RTN4,SOCS3,TPP1	2668 (15)
Ap2		group		0.396	0.00678	ADM,C3,CDH1,ERBB2,ERBB3,FOXA1,HSD17B1,ICAM1,IFNGR1,KIT,LIPA,MCAM,MMP2,MT2A,SAA1,SMPD1,TERT,TGFB1,UFD1,VEGFA	1839 (12)
Ifn gamma		complex	Inhibited	-3.152	0.00684	BAG1,BCL2L1,BMI1,CASP1,CASP3,CDKN1B,COL1A1,CXCL16,CXCL8,EDN1,EIF2AK2,FAS,FLT1,FN1,GBP1,ICAM1,IFI44L,IGFBP4,IGFBP5,IL1B,IL32,IRF8,JAK2,LAMA1,LGALS9,LIF,MAP4K4,MAPK1,MYD88,NOS2,NR3C1,NR4A3,PCDH7,PMAIP1,PML,PPARG,PSME1,PSME2,SOCS3,STAT1,TERT,TGFB2,TLR3,TNFRSF13C,XAF1	1694 (14)
selumetinib		chemical drug		0.147	0.00691	ABCC1,BIRC5,CCND1,CD274,CDKN1B,ERBB3,HIF1A,JUN,MITF,RUNX2,SLC2A1,TNFRSF10A	2006 (17)
RHOJ	4.718	enzyme			0.00691	ACTG1,ANXA1,ATP2A2,CALU,CAV1,CCNI,GSN,LRP1B,MYH9,RASA3,RND3,SEC62
HNF1A-AS1		other		0.792	0.00691	BIRC5,CDH1,CDH2,CEP55,CTNNB1,H2BC12,HJURP,JADE1,KIF22,NCAPG,SOX21,UBE2C
NUMB	-0.638	other		0.92	0.00691	APP,BCL2L1,BIRC3,CCNB1,CDK1,CFLAR,DLL4,EGFR,HEY1,HEY2,IFI16,TP53	2105 (18)
ITGA6	-3.878	transmembrane receptor		0.061	0.00691	BCL2L1,BIRC5,CTNNB1,DVL2,ENPP2,ITGA2,ITGA3,ITGA7,LGR5,RPSA,TP53,VEGFA	2454 (20)
PDCD4	1.016	other		0.761	0.00691	CASP3,CDH1,IL1B,IL6,JUN,LOX,MAP4K1,PDCD4,PLAU,PLAUR,PTGS2,VEGFC	2122 (18)
BACH1	-0.353	transcription regulator		1.169	0.00691	CALM1 (includes others),CXCR4,DNAJC7,FTH1,GCLM,HMOX1,ME1,NQO1,SLC7A11,SPP1,SQSTM1,TFE3	612 (7)
DSP	-0.94	other		-1.756	0.00691	AXIN2,COL1A1,COL3A1,CTNNB1,DSC2,DSC3,JUP,KRAS,LPL,MMP14,PPARG,TGFB1	1673 (7)
diethylmaleate		chemical toxicant		-0.353	0.00691	BIRC2,GBE1,GSTP1,HMOX1,IL1B,NFKBIA,NOS2,NQO1,RANBP2,SLC3A2,SLC7A11,TNFAIP3	2073 (14)
riboflavin		chemical - endogenous mammalian		-1.155	0.00691	CSNK1A1,DKK1,EP300,FZD6,GLI1,JUN,MMP2,PITX2,PTCH1,SUFU,TIMP1,WNT4	846 (7)
E2f		group		-0.225	0.00692	ALG5,BBC3,CAV1,CBX5,CCNA1,CCNB1,CDC25A,CDC45,CDC6,CDC7,CDK1,CDK2,CENPO,CYP27B1,DHFR,DLEU1,E2F1,E2F2,EPAS1,EXOSC8,FANCD2,FOXD3,GAS2L1,GINS2,GMNN,GOLT1B,HDAC1,HIF1A,HNRNPA1,ITGA5,ITGA6,ITGB1,MCM10,MCM3,MCM5,MCM6,MIR17HG,NASP,PCSK1N,PCYT1A,PGRMC1,POLA1,PRR11,RBL1,RECQL,RRM2,SKA2,SNRPC,STMN1,TGM1,TP53,TPX2,UBE2C,WDR76,ZNF160	1789 (17)
15-deoxy-delta-12,14 -PGJ 2		chemical - endogenous mammalian	Activated	2.053	0.00693	AGTR1,BAK1,BCL2L1,BIRC2,BIRC3,BIRC5,CASP3,CAV2,CCN2,CCNB1,CCND1,CCNG1,CDK2,CEBPD,CFLAR,COL1A1,CSF2,CTSB,CTSD,CXCL11,CXCL2,CXCL8,DDX58,DGKA,E2F1,E2F2,EGR1,FKBP4,FLT1,FN1,FTH1,GADD45A,GCLM,GDF15,GSN,GSR,GSTP1,HMOX1,HSPB1,HTRA3,ICAM1,IL1A,IL1B,IL6,IRF1,JUN,LAMP1,MAPK14,MCL1,MXD1,NFE2L2,NFKB1,NFKBIA,NOS2,NQO1,PARP1,PLA2G4A,PLAAT4,PLAU,PPARG,PRDX1,PTGES,PTGS2,RARB,RORA,RUNX2,SCARB1,SLC2A4,SLC9A1,SOAT1…	1310 (11)
nilotinib		chemical drug		0.643	0.00702	ABCC4,ABCD3,BCL2L1,CCNB1,CDC6,CDK7,CDKN1B,COL1A1,FN1,H2AX,IL7,JAK2,MCM3,MCM6,PIK3CA,PRKDC,PTPN11,RAF1,SMC3,TWIST1,WEE1,YWHAE,YWHAZ,ZEB1,ZEB2	1891 (19)
BAPTA-AM		chemical reagent		-0.039	0.00702	BDNF,CCK,CDH1,COL1A1,CXCL11,CXCL8,EGR1,FLT1,FN1,GDNF,HSPA5,ICAM1,IL6,JUN,MMP16,MMP2,NFATC1,NR4A1,PPP2CA,PTGS2,SCN9A,SLC2A4,SOCS2,SOCS3,TRPC3	1021 (14)
NFKBIB	-0.006	transcription regulator	Inhibited	-2.566	0.00734	BCL2A1,BCL2L1,CARD6,CASP6,CASP7,CFLAR,CTSV,CXCL1,CXCL2,CXCL8,DAPK1,EGR1,GNAI2,ICAM1,IGF1R,IL1B,IL6,NFKBIA,NOS2,PLAU,RYR1,SMAD7,SYTL1,TP53INP1,TP73,VEGFA,XIAP	1765 (11)
choline fenofibrate		chemical drug		0.105	0.00749	ACSL1,ADIPOR1,CAV1,CPT1A,CXCL12,F3,FURIN,HIF1A,NFKBIA,NPC1,NPC2,NR1D1,PCSK5,PCSK9,PPARA,PTPRF	787 (7)
CDH11	1.88	other	Inhibited	-2.5	0.00749	ADI1,CCN5,CD9,JUP,LAMA5,MBD2,NOS2,PIK3R1,PRKCD,PTK2B,RAC1,SERPINA1,SLC9A3R1,TFAP2C,TJP1,TNK2	1677 (7)
IND S7		chemical - kinase inhibitor		-0.5	0.00749	ACTB,ATP5F1B,ATP5F1D,C1QBP,CALU,COX5A,ETFA,GLOD4,GLUD1,HNRNPL,HSPA1A/HSPA1B,KHSRP,PDIA3,PRDX2,STIP1,VIM
bevacizumab		biologic drug		0.905	0.00749	CDH1,CDH2,CXCL12,CXCR4,EGFR,FN1,NRP1,SNAI2,VEGFA,VIM,ZEB1	1695 (15)
NFkB (family)		group		-1.424	0.00749	BCL2L1,CCND1,CFLAR,CXCL8,IL6,LPL,NCAM1,PTEN,PTGS2,TIMP1,TNFAIP3	866 (7)
PHLPP1	0.048	enzyme		-1.668	0.00749	CEBPD,CXCL2,CXCL3,FOXO1,IL15,IL18,IRS1,LHX2,MCL1,PRKCA,PRKCD	1673 (13)
PSMB8	-8.767	peptidase		0.522	0.00749	IL1A,IL6,IRS1,MAGEA3/MAGEA6,NFKB1,NFKB2,NFKBIA,NOS2,PTGS2,RPS3,TNFAIP3	1874 (14)
mir-451		microRNA		1.844	0.00749	ABI1,CELF2,EMC4,ETS2,KLF7,PGM1,RAB14,RAC1,RASA1,YWHAZ,ZNF148
DNAJB6	-0.198	transcription regulator		-1.718	0.00749	CDH2,CDKN1B,CTNNB1,DKK1,KRT18,NPM1,SNAI2,SPARC,SPP1,TWIST1,VIM	2084 (15)
batimastat		chemical - protease inhibitor		0.971	0.00749	CASP1,CEBPB,CXCL2,FGF2,LIPE,MMP14,MMP2,NCR3LG1,SDC4,SLC2A1,VEGFA	1812 (17)
N-cor		group		-0.707	0.0075	ABCA1,ACACB,ACSL1,ADIPOR2,ASAP1,AXIN2,BIN1,CCND1,CDK6,CTSB,CTSS,CXCL2,DHRS3,FAM20C,G6PD,GSTP1,HBEGF,HIVEP2,IGFBP3,IL1A,IL1B,INPP4B,MBNL1,MGA,MMP2,NFATC1,OLR1,PDGFA,PDGFB,PLIN2,PTGS2,RAB20,RARB,REST,RHOB,RNF144B,SGK1,SLC2A4,SLC44A1,SNAI2,TBC1D2,TBX1,TBX2,TRERF1,WIPF1,ZNF703	2216 (22)
PSEN2	0.914	peptidase		1.176	0.0075	ACSL1,ACTB,ANXA6,APP,ARHGDIG,ATP2A2,CAP1,CASP3,CD9,COX5A,CTNNB1,CTSC,CTSS,CTSZ,DBP,DHRS7,EGFR,EMP1,ENPP2,FBXW7,FZD4,GAPDH,GDF11,GNB1,HAND1,HLA-E,HSD17B1,IGF1R,IMPACT,INSR,KIF5B,LHX8,MBP,MTF1,NDUFS8,NOTCH1,PSEN1,PSEN2,PTGS2,PTPRF,SLC38A2,SNAPC3,TP53,UBC,UEVLD,XIAP	2309 (20)
AGTR1	6.964	G-protein coupled receptor		1.242	0.00752	CASP3,CCND1,COL3A1,DUSP1,EDN1,EGFR,FN1,GABRB3,GRN,GSTP1,HMOX1,IL6,JUN,MAPK1,MGST1,OLR1,PTGS2,RHOA,SGK1,TGFB1,TXNIP,XDH	1898 (16)
HOXC6	7.763	transcription regulator		0.614	0.00752	ABCB1,APBB1,ARMH4,BMP7,CASP1,CNTN1,ERRFI1,GAS2L3,HOXC6,IGFBP3,IRAK4,MME,NFKB2,PAK1,RUNX1,SH3D19,SIPA1L1,SLC1A3,SLC44A1,TNFAIP8,ZBTB7C,ZNF536
NFIB	-1.461	transcription regulator		0.152	0.00752	ADAMTSL4,BMP6,CACNA2D2,CDK18,CHD3,CREB5,EFNB1,EYA1,FHOD3,GFRA1,HSD17B7,JCAD,KRT8,LDHC,LOX,LZTS1,NCAM1,NT5E,PLEKHF1,STEAP4,TNS1,WHRN
ibuprofen		chemical drug	Activated	2.109	0.00752	APP,CCND1,COL12A1,EPAS1,GDF15,HIF1A,IL1B,IL6,LAMB1,MAGI1,MMP2,NGFR,NOS2,PLIN2,PPARG,PTGS1,PTGS2,RAC1,RAC3,SLC2A1,TNFRSF21,VEGFA	1425 (15)
cinnamaldehyde		chemical toxicant		1.281	0.00752	BCL2L1,CAT,FTH1,GCLM,HMOX1,IL1B,IRAK1,IRAK4,MKI67,NFE2L2,NFKB1,NOS2,NQO1,PPARG,PRDM16,PTGS2,SLC2A4,SQSTM1,SRXN1,TLR6,TXNIP,XIAP	1980 (20)
SFTPA1		transporter	Activated	2.411	0.00754	ADRB2,AMOT,ANGPTL4,ARRB2,CCN1,CCN2,CDH10,COL1A1,CXCL2,CXCL3,CYP1B1,ECM1,EGR1,EVI2B,FRMD6,FZD8,GFPT2,GPR68,GSTO2,GUCY1A1,HBEGF,IL1A,IL1B,IL1RL1,IL6,KCNMB4,LOX,LRIG1,MAP1B,NOS2,PDK4,PHLDA1,PLAAT4,PLIN2,SH3PXD2A,TGFB1,TWIST1	2269 (17)
APC	0.355	enzyme		0.746	0.0076	ADGRV1,ALPP,APCDD1,AREG,ASCL2,AXIN2,BIRC5,CCK,CCND1,CDH1,CDH2,CDX2,CHRNA7,CTNNB1,CXCL12,CXCL2,CXCL3,EDN1,EPHB3,FABP6,GLI1,GLI2,HIF1A,HK2,ID1,ID3,IDH3G,IGFBP5,IL6,JAG1,LCK,LGR5,LPL,MDH2,MXD1,NOS2,NOTCH1,OGDH,PDK4,PLA2G4A,PPARA,PPARD,PRKCA,PTEN,PTGS1,PTGS2,SGK1,SNAI2,SOX9,SPP1,STAT3,SUCLG2,TIMP1,TJP1,TNFRSF12A,TNFRSF19,TP53,VEGFA,ZEB1	2147 (20)
PLN		transporter			0.00765	ACTB,ADAM17,ADAM9,ANXA2,ATP2B1,CALU,EZR,GNA11,GNAI2,HEY2,HSP90B1,ITGB1,MYH3,MYL6,NOTCH1,NUMB,PRKCA,RAB10,RAB1A,RAB21,RAB5B,RACK1,RALA,RRAS,RYR2,SGCB,SOD1,SPTB,VAMP2,VCP,VIM	2394 (18)
UPF1	-0.491	enzyme		-0.103	0.00776	ADAM9,ANGPTL4,BIRC3,CD164,CDH1,CDKN1B,DNAJB11,FXYD5,GRN,IQGAP1,ITGA5,LBR,mir-205,NRM,PTBP2,PYGL,SGK1,SMG1,UPF3B
methylnitrosourea		chemical toxicant		0.283	0.00776	AURKA,CDK2,CDKN1B,CXCL3,EGR1,FHIT,GNAI2,GSTP1,ID1,JUN,KRAS,PLAUR,PSMA7,PSME1,RPS11,RPS12,SOD1,TIMP2,TIMP3	2129 (19)
SN-38		chemical drug		-0.857	0.00776	BAD,BAK1,BCL2L1,BCL2L2,BIRC2,BIRC3,BMP6,CASP8,CCNB1,EGFR,ERBB2,FAS,GDF15,HK2,IL1A,MCL1,SPRR2D,TP53,XIAP	1514 (12)
ONECUT1	3.287	transcription regulator			0.00783	AASS,ABL2,ACACB,ACP3,ACSS3,ACVR1,AGBL2,AGTR1,ALDH5A1,APIP,ARHGAP32,ATG101,BCAR1,BUD23,C11orf1,C1S,CCT8,CDC25A,CDK2,CEBPD,CENPN,CFAP300,CLCN4,CLNS1A,COPB2,CXCL1,CXCL3,CYGB,DDB2,E2F1,ELOA,ELOVL1,EXOSC5,FABP5,FADS3,FAM117A,FAS,GABPA,GLA,GRB2,GSS,GSTA4,GUF1,HNF1B,HNRNPA2B1,HNRNPR,HSPA1A/HSPA1B,HSPH1,IRF3,IRF6,ITGAV,KATNBL1,KDM8,KLF3,LPL,LRIG2,LUC7L3,MAGED2,MFSD1,MON1B,MYOF,NEK6,NFKBIA,NIPAL2,NOLC1,NU…
novobiocin		chemical drug		0.557	0.00789	CA9,ERBB2,HRH1,MKI67,RAF1,SRC,TP53	854 (10)
(-)-epicatechin gallate		chemical - endogenous non-mammalian		-1.394	0.00789	DLX5,GDF15,MSX2,PPP1CA,RUNX2,SPP1,WWTR1	1149 (15)
APC/APC2		group		-0.351	0.00789	CDKN1B,CTNNB1,JAG1,JUP,MCL1,MMP14,NOS2	1672 (7)
bendamustine		chemical drug		1.134	0.00789	AURKA,CCNB1,EXO1,MCL1,PLK1,PMAIP1,TP53	1632 (7)
PHF8	0.956	enzyme			0.00789	CDC25A,E2F1,ID1,IRAK3,RARB,RBL1,TGM2	2251 (21)
NEK7	-1.204	kinase		-1.134	0.00789	ACP3,EDN1,IL12A,ISG15,LMO4,PTGS2,RGCC	867 (7)
CTNND1	-1.984	other		-0.477	0.00789	CDH1,CDH2,CDH3,CDH5,CTNNB1,CXCL8,VIM	2120 (19)
SHOX	2.294	transcription regulator			0.00789	CCNB1,CDK1,CDKN1B,NKX2-5,RB1,RBL1,TP53
RTKN	-0.414	other		-0.378	0.00789	BCL2A1,BCL2L1,BIRC3,CDH1,CDH2,TNFAIP3,VIM	1485 (10)
MCAM	-1.688	other		-0.678	0.00789	CD24,CDH1,FN1,ID1,MMP2,SNAI2,VIM	1813 (15)
TFR2	-9.237	transporter		-1.698	0.00789	BCL2L1,BMP6,ERFE,FURIN,GDF15,SCRIB,SLC40A1
raltitrexed		chemical drug		-1.069	0.00789	ANXA2,DHFR,FAS,FXYD3,SAT1,TMSB10/TMSB4X,TP53
poloxamer		chemical reagent		-0.169	0.00789	ABCD3,ACADM,ACOX1,CPT1A,DMD,LPL,PPARA
L-N6-(1-iminoethyl)-lysine		chemical reagent		-0.728	0.00789	HMOX1,IRS1,NOS2,PTGS2,STAT3,TGFB1,VEGFA	1309 (7)
1'-acetoxychavicol acetate		chemical reagent	Activated	2.53	0.00799	BCL2A1,BCL2L1,BIRC2,BIRC3,BIRC5,CCND1,CFLAR,ICAM1,PTGS2,XIAP	1543 (11)
TIFA	-0.611	other	Inhibited	-2.025	0.00799	BCL2L1,CASP1,CSF2,CXCL3,CXCL8,ICAM1,IL11,IL6,NFKBIA,TNFAIP3	1782 (11)
miR-96-5p (and other miRNAs w/seed UUGGCAC)		mature microRNA		1.218	0.00799	ADCY6,AHCYL1,FN1,FOXO1,IRS1,ITGB1,KRAS,MITF,RYK,SERPINE2
miR-129-5p (and other miRNAs w/seed UUUUUGC)		mature microRNA		0.859	0.00799	BMPR2,CAMTA1,CDH1,CDH2,ETV6,FNDC3B,GALNT1,PDS5A,TP53INP1,ZFP91
mir-199		microRNA		1.939	0.00799	ALOX5AP,AXL,EDN1,EGLN1,HIF1A,MAP3K11,NOS2,SIRT1,TP53,VEGFA	1725 (16)
VEGFC	-3.238	growth factor		0.298	0.00799	BAG1,CTTN,CXCR4,FLT4,ITGA4,ITGB1,NOS2,PROX1,PTGS2,VEGFC	1965 (19)
SPINT1	-8.372	other		-1.878	0.00799	APCDD1,CTNNB1,FZD3,FZD6,IGFBP4,PROX1,ROR2,TCF4,WNT11,WNT5A
ECM1	-3.313	transporter		0.749	0.00799	BMI1,CDH1,GRN,POU5F1,PTHLH,S100A4,SNAI2,VIM,ZEB1,ZEB2	1983 (14)
L-685,458		chemical - protease inhibitor		0.731	0.00799	APP,DLL4,EFNB2,EGFR,HEY1,ID1,LAMP1,NR2F2,PTPRK,TP53	1924 (16)
FGF8	3.343	growth factor		-0.2	0.00801	AIF1L,BMP2,BMP4,CCDC50,CCND1,CITED4,COL18A1,CTNNB1,CYCS,DDAH2,DKK1,DLX1,DLX2,DLX5,DTX3,DUSP23,ELL2,EN1,EN2,ERRFI1,ETV5,FGFR1,FGFR4,FOXG1,HOXD13,LHX6,LHX8,MKI67,MSX1,OTX2,PAX6,RGP1,RGS12,RTN4RL1,RUNX2,SHC1,SPARC,SPP1,SPRY2,TM7SF2,TRIP6,VDR	1746 (21)
FEV	3.131	transcription regulator	Activated	2.276	0.00824	ANXA2,CITED1,CNTN1,CNTNAP3,CXCR4,EN1,EPHA7,FBH1,FOXA1,GABPB1,GABRQ,GPR176,HTRA1,ICAM1,ITGB1,JAM2,KCTD10,KCTD20,LPAR1,NCALD,NR2F2,NR3C1,NTN1,NTS,PCDH9,PROX1,PYGB,RNF2,RORB,SATB1,SEMA3E,SLC1A3,SLC37A3,SLC6A15,SLC7A8,SLIT2,SOX9,STXBP6,SYT1,VIM
PAX3-FOXO1		fusion gene/product	Activated	2.387	0.00825	ABI1,ADRA2C,AKR1B1,ANLN,ARID3A,AURKA,AXL,CADM1,CCN1,CCND1,CCNG1,CCPG1,CD63,CDC25B,CDK1,CDKN2B,CDKN2D,CEP170B,CHD7,CLIC1,CORO1C,CREB3,CSF1,CXCR4,DAPK1,DHFR,DNAJC7,DUSP1,EEF2,ELOVL2,EPB41L3,ERBB3,ESYT1,EYA2,FBL,FDFT1,FGFR4,FLNC,FOSL1,FOXO1,FOXO4,GLUD1,HEY1,HMOX1,HOXB9,HSPA1A/HSPA1B,IER3,IGF1R,IGFBP2,IGFBP5,IL4R,IL6ST,INPP1,IRS1,JARID2,KLF5,MCAM,MEOX1,MET,MYH10,NAB2,NDN,NFIB,NGFR,NONO,NRCAM,P4HB,PGD…	1780 (15)
NR4A1	1.625	ligand-dependent nuclear receptor		-0.329	0.00833	ACLY,ACO2,ACSL4,ADIPOR2,ADM,ATP5F1B,ATP5MC3,ATP5PF,AXIN2,BIRC5,BPGM,CCND1,CDH5,CDKN1B,COL16A1,COL1A1,COL6A1,COL6A2,COX11,COX6B2,CRABP2,CSF1,CSF2,CTNNB1,CTNND1,CXCL12,DAPK1,DFFA,DLD,E2F1,ELK3,EP300,EPCAM,G0S2,G6PD,GALM,GBE1,GCK,GSK3B,HDAC1,HIF1A,HK2,HMOX1,ICAM1,IDH2,IKZF2,IL1B,IL6,ITGB1,JUP,KRT18,KRT8,LDLR,LPL,MAFA,MAPK8,MARCKSL1,MDH2,NDUFA1,NDUFA3,NDUFA6,NDUFB4,NDUFS7,NDUFS8,NDUFV3,NFKBIA,NOL3,NR…	2185 (20)
sorbitol		chemical - endogenous mammalian		-0.587	0.00833	AKR1B1,BCL2L1,CCN1,CCN2,ERRFI1,MAP3K11,RGS7,SGK1,SLC1A3	1536 (21)
MDGA2	8.423	other		-1	0.00833	ADGRB1,ATR,BCL2A1,BID,FAS,IL6,MSH2,SESN2,WT1
SAMHD1	-0.956	enzyme	Activated	2.376	0.00833	DDX58,IFI27,IFI6,IL6,MX1,NFKB1,NFKB2,NFKBIA,SAMHD1	1443 (10)
RYR2	7.66	ion channel	Activated	2.345	0.00833	CAPN10,COL8A1,FOXO1,IL6,KRT8,MMP2,PPARA,PPARGC1A,SIRT1	1780 (15)
UBA1	0.174	enzyme		1.706	0.00833	ATF4,BIRC2,BIRC3,CCND1,CDKN1B,EIF2AK2,HSPA5,MAPK8,TP53	1672 (10)
mir-373		microRNA		1.447	0.00833	ANGPTL4,CDH1,CDK2,CXCL8,IL6,LATS2,PTHLH,RECK,TGFBR2	1502 (9)
JARID2	0.96	transcription regulator	Activated	2.035	0.00833	CCND1,CDH1,CDK1,GATA2,HOXD8,NOTCH1,PTEN,ZEB1,ZEB2	1300 (14)
CLCA2	-4.787	ion channel		-1.062	0.00833	CASP3,CASP8,CDH1,CDH2,CDKN1B,FN1,GRN,TP53,VIM
icatibant		biologic drug		-0.707	0.00833	AGTR1,BDKRB1,BDKRB2,CHRM3,ICAM1,NOTCH1,PTGS2,STAT3,TGFB1	1160 (16)
nitroglycerin		chemical drug		0.29	0.00837	ADAM10,CALCB,CXCL8,FLT1,HMOX1,IL6,PLAUR,TP73	1354 (15)
echinomycin		chemical drug		1.488	0.00837	CXCR4,HK2,IL1A,IL6,MST1R,NOS2,NOTCH1,VEGFA	1955 (13)
ISGF3		complex	Inhibited	-2.412	0.00837	EIF2AK2,HIF1A,IFIH1,IFIT2,IRF1,IRF7,ISG15,RSAD2
CDCA7L	-0.741	other			0.00837	CCNB1,CDC6,DHFR,MAOA,MCM3,MSH2,POLA1,RBL1
USP8	-0.662	peptidase			0.00837	APP,EGFR,ERBB3,HGS,HNRNPD,MET,SHANK3,STAM2	1353 (11)
S100A7	-5.782	other	Inhibited	-2.121	0.00837	CA9,CDKN1B,CSF2,CXCL1,CXCL8,IL11,IL1A,VEGFA	1491 (15)
TAS1R3	-1.245	G-protein coupled receptor		-0.863	0.00837	CHRM3,PPARG,SLC16A1,SLC1A5,SLC3A2,SLC7A11,SLC7A3,TSC2
hexarelin		chemical toxicant		1.471	0.00837	ATP5F1B,INSIG1,INSIG2,LIPE,LPL,PPARG,PPARGC1A,TIMP1	1873 (18)
CA074-methyl ester		chemical reagent		0.288	0.00837	APP,CTSB,IL1B,LAMP1,LAMP2,NLRP3,SPHK1,TPD52	2191 (13)
panobinostat		chemical drug		0.253	0.00843	BBC3,BCL2L1,BIRC5,BMI1,CCNB1,CDK1,CDK6,CDKN1B,CEBPD,FLNA,GUCY1B1,ITCH,KIT,MCL1,MICA,PMAIP1,PSMD10,PTGS2,RAC1,RASGRP2,RHOA,SLC9A3R1,TP73,ULBP2,VIM,YWHAZ	1886 (17)
IDH1	-0.348	enzyme		1.89	0.00843	ATF4,CD47,CDH1,CFD,CLDN7,CREB3L1,EGR1,EPAS1,FN1,GLI1,GLUD1,LPL,MX1,NMRAL1,PPARG,PTCH1,RAB25,RUNX2,SERPINH1,SLC2A1,SLC2A4,TGFB2,TP53,VIM,ZEB1,ZEB2	2757 (25)
DCAF1	1.13	kinase	Activated	2.428	0.00848	BAD,CCNB1,CDC25B,CENPF,FOXM1,KLF10,OPN3,PLK1,PTGES,SIK1/SIK1B,SOCS2,SOCS3,TGM2,TXNIP,UCN	2030 (11)
Trp53cor1		other		1.065	0.00848	BBC3,BNC1,CITED1,FOXE1,FZD10,IL1B,IL6,MCL1,NPAS1,NPTX1,NTN1,PERP,SSTR2,STAT3,WNT3A	2228 (14)
SGPP2	-0.969	phosphatase		-0.082	0.00848	ATF4,CDH1,DNAJA4,DNAJC22,DNAJC3,HSPA14,HSPA4,HSPA4L,HSPA5,HSPA8,HSPB8,HSPH1,IL1B,IL6,XBP1	1588 (10)
dinoprost		chemical - endogenous mammalian		-1.208	0.0086	ADM,ANXA4,ATP2A2,CCND1,EDN1,EGFR,FGF2,FOSL2,GSTP1,HSPA1A/HSPA1B,HSPA4,ID1,ID3,IL1A,IL1B,IL6,JUN,LIPA,LPL,MAPK6,MGST1,NR4A1,PLA2G4A,PTGS1,PTGS2,PTK2B,RUNX2,SCP2,SPP1,TGFA,TGFB1,TIMP3,VEGFA,YWHAE,YWHAG,YWHAZ	1950 (20)
RBL1	-1.088	transcription regulator		-0.795	0.0086	CASP4,CASP6,CCND1,CDC25A,CDC6,CDK1,CDK2,CDKN1B,DDB1,DHFR,DUSP10,E2F1,F3,FAS,FGF2,KRT10,MCM10,MCM3,MCM5,MCM6,MCM7,MET,NOTCH1,PA2G4,PLK1,PPARGC1A,PPP1R8,RB1,RBL1,RRM1,RRM2,TERT,TP53,TP73,VEGFB,ZEB1	2395 (22)
ENG	-8.221	transmembrane receptor		-0.864	0.00864	CCN2,CDH5,CXCR4,FN1,H2AX,ID1,ITGA1,ITGA5,ITGA6,NBN,NTHL1,PAK1,PDGFB,PLAU,RAC2,SIRT1,SMAD2,SMAD7,TGFB1,TGFBR2,TWIST1	2049 (16)
EFNA2	3.908	kinase		0.784	0.00866	ABCA12,BDNF,CCN2,CDC5L,CRABP2,CSF2,CUX1,DCBLD2,DUSP4,DUSP6,ETV5,FABP5,FOSL1,FOXQ1,IRF7,KLK7,KRT10,KRT18,NEDD4L,NT5E,PTHLH,PXN,RUNX1,SOX9,TGM1,TRIM5,UBE2C,WWP1	741 (7)
FGF7	3.661	growth factor	Inhibited	-3.703	0.00872	ABCC3,ADSL,APRT,BCL2L1,CCND1,CDK2,CEBPD,CSF1,EGFR,ETV5,FABP5,FGFR1,FOXF1,FOXM1,HAS2,HAS3,HPRT1,IL1A,IL7,IRF1,IRF2,LPCAT1,MMP2,NFE2L2,NFE2L3,PLAU,PTAFR,RUNX2,S100A10,SDC1,SPRY2,STAT1,TP53,VEGFA	1131 (15)
miR-204-5p (and other miRNAs w/seed UCCCUUU)		mature microRNA		0.258	0.00877	ACVR1,ATF4,ATP2B1,BMP1,BMP2,CAMK2B,CBFB,CDC25B,CHRD,CHRNA5,CHRNA7,CTSC,EFNB1,FBN2,GNB1,HOXB7,ITPR1,LTBP1,MICOS10-NBL1/NBL1,PIK3R1,PPARG,PPP2CA,PTPN11,SHC1,SMAD3,SMAD9,SPARC,STXBP1,TGFBR2,VAMP2
carbon monoxide		chemical - endogenous mammalian		1.639	0.00877	ATF4,BDNF,CASP3,CAV1,CD14,CFLAR,CSF2,CXCL12,EGR1,F3,FN1,GDNF,HIF1A,HMGB1,HMOX1,ICAM1,IL1B,IL6,IRF8,ITGB1,MAPK14,NCF2,NOS2,NQO1,PLAUR,PRDX1,PTGS2,TGFB1,VEGFA,XBP1	1385 (13)
cytarabine		chemical drug	Inhibited	-2.821	0.00878	ADGRE5,ATG5,BBC3,CCNB1,CD274,CDC25A,CDK1,FAS,GADD45A,GAPDH,HLA-A,ICAM1,IL12A,IL1B,IL36RN,IL6,MCC,MCL1,POU5F1,PPP1CA,SESN2,TGFB2,THRA,TLR1,TLR2,TNFRSF13C,TOP2A,TP53,TP53INP1,TRIAP1,ULBP2,XIAP	1944 (15)
CR1L	4.013	other		1.156	0.00888	BGN,C3,CCN2,COL18A1,COL1A1,COL3A1,COL4A1,COL4A2,COL5A1,COL6A1,COL8A1,FBN1,IL1B,LUM,PTGER4,TGFB1,TNC,TNFRSF1A	1316 (16)
UBE2I	0.622	enzyme		0.851	0.00888	CCND1,CEBPD,CPT1A,IRF1,NOS2,PDK4,PML,PPARG,PPARGC1A,PRDM16,SCNN1A,SGK1,SLC2A1,SLC2A4,SOX9,STAT1,TAP1,XBP1	2123 (22)
IL13	2.634	cytokine	Inhibited	-3.381	0.00894	ABCA1,ACADVL,ACOX1,ACSL1,ADA,ADAM15,ADAM8,ALDH1A2,ALOX5AP,ARG2,ARNTL2,AVPI1,BCL2A1,BCL2L1,BCL3,BDNF,BID,BIRC2,BTNL9,C3,CAPN2,CASP1,CASP3,CASP6,CASP7,CASP8,CCDC186,CCN2,CD14,CEBPB,CHCHD7,CHST2,CIDEB,CLEC7A,COL18A1,COL1A1,COL3A1,COL6A2,CTNNAL1,CTSB,CTSC,CTSH,CTSS,CTSV,CXCL1,CXCL2,CXCL3,CXCL8,CXCR4,DUOX1,DUSP10,DYNLT3,EGFR,EGR1,ENPP2,EPAS1,ERBB4,EVL,EZR,F3,FAS,FEZ1,FGFR3,FKBP1A,FXYD3,FZR1,G0S2,G6PD,…	1687 (13)
androgen		chemical drug		-1.364	0.00917	ADAMTS15,ADI1,AKR1C3,AKT1,ALDH6A1,ARHGEF26,AXIN1,AXIN2,BDNF,BMP4,BMP6,CA8,CALR,CASP7,CCND1,CCND3,CDKN1B,COL12A1,COL4A2,CTNNB1,CTNNBL1,CTSB,CTSV,CTSZ,CXCR4,DNMT3B,EP300,ERBB3,ETS1,FGF2,FLNA,FOSL1,GPT2,GSN,IGFBP2,IGFBP5,JUN,KLF5,NFKBIA,NR4A1,NR6A1,NTRK2,PDS5B,PIK3R1,PIM1,PTEN,PTGS2,PTP4A2,PTPN1,PTPRK,RUNX1,RUNX2,SDC1,SDC4,SMAD2,SMAD3,SOAT1,SOX9,STAT3,TACC2,TLE5,TNFAIP8,TPT1,TRADD,TSC2,TWIST1,VEGFC,…	1932 (15)
cardiotoxin		chemical - other	Inhibited	-2.247	0.00921	ACOX1,ACSL5,ADAM10,APRT,B2M,BGN,BIK,BIRC5,CASP1,CASP3,CCND1,CCND3,CCNE2,COL6A2,CSF1R,CTSV,CXCR4,E2F1,E2F2,EFNA2,EZR,FBL,FGFR1,G6PD,GM2A,GMNN,GNAI3,HSPA5,IGFBP7,IL13RA1,IL18,IL1B,IL1R1,IL36G,IL4R,IL7R,ITGA1,ITGA4,ITGA5,ITGA6,ITGB5,LRRFIP1,LTBP1,MCM3,MCM7,MEST,MMP2,MYH9,NASP,NOS2,NPM1,OSTF1,PAX3,PDGFB,PLAGL1,RANBP1,RBL1,RPSA,SERPINB2,SFXN1,SPP1,STAT3,TIMP1,TNFRSF8,TPD52,TSC22D1,TSHZ3,UCP2
IFNAR1	-0.228	transmembrane receptor	Inhibited	-4.408	0.00922	AXL,B2M,CD274,CGAS,CLIC5,CMPK2,CSF1,CXCL11,CXCL2,CXCL3,DUSP6,EIF2AK2,GBP4,HLA-A,HSH2D,IDI1,IFI16,IFI44,IFI6,IFIH1,IFIT2,IFIT3,IFITM1,IFNGR1,IL12A,IL15,IL18,IL1A,IL1B,IL6,IRF1,IRF7,ISG15,ITGAV,KLK6,LAMP3,LIF,MX2,NOS2,OAS1,OAS2,OAS3,OASL,PARP12,PLA2G7,PTGS2,RSAD2,RTP4,SDC1,SLFN12L,SOCS3,SOD2,SQLE,SREBF2,STAT1,TAPBPL,TGM2,TLR2,TLR3,TNFAIP2,TNFAIP3,TRIM22,USP25,VEGFB,XAF1	1095 (14)
2-methoxyestradiol		chemical - endogenous mammalian		1.617	0.00927	AREG,BCL2L1,BID,CAV1,CXCR4,F3,GPR161,HIF1A,HMOX1,HRK,ID1,IL6,ITGB5,LOX,MCL1,PTGS2,SERPINE2,SOD1,SOX6,SPON1,TP53,XIAP,YWHAB	1690 (16)
EFNA5	-0.209	kinase		1.781	0.00927	ABCA12,BDNF,CCN2,CRABP2,DCBLD2,DUSP4,DUSP6,EGFR,ETV5,FABP5,FOSL1,FOXD3,IRF1,IRF7,KLK7,KRT10,KRT18,NT5E,PTHLH,RHOA,SOX9,TGM1,UBE2C	1967 (16)
TXNRD1	0.195	enzyme	Activated	2.045	0.00927	ABCC3,AOX1,CBR3,ESRRG,FAS,GABPB1,GPX3,HMOX1,IKBKG,ME1,MOCOS,NQO1,PGD,PTGR1,SCAP,SELENOT,SLC2A1,SRXN1,TNFRSF10A,TNFRSF25,TP53,UGDH,UGP2	2150 (19)
EHMT1	0.236	transcription regulator	Inhibited	-2.441	0.00928	A4GALT,ACSL1,ADGRL1,BCL9L,BCR,BEST1,C1orf122,C3,CDH1,CEBPD,CORO2A,EFNA1,GRAMD4,GRINA,HES2,IL17RC,ITGA3,ITPRIP,MAN1C1,MGST1,MLH1,MSLN,MSRB1,NIBAN2,PCSK6,PISD,PKP2,PLIN2,POU5F1,PPL,PSD4,RAB11FIP3,RGCC,RXRA,SAT1,SCNN1A,SDSL,SELENBP1,SH3TC1,SLC4A11,SLC8B1,SMPDL3B,STAC2,THRA,TLE2,UNC13B	1834 (7)
LIPE	-2.166	enzyme		0.863	0.00944	ABCA1,ACSL1,ANKRD1,ANKRD2,CASP8,CEBPB,COL1A1,EDN1,EGR1,FKBP5,G0S2,GAPDH,GRB10,H3-3A/H3-3B,HSPA1A/HSPA1B,IL1RL1,ITGA6,JUP,LYL1,MAPKAPK2,MAPT,MEF2C,MYH3,NCOA2,NEDD1,NET1,NR4A1,NRIP1,PC,PDE8A,PDHA1,PDK4,PER1,PLIN2,POLR2K,PPARG,PPARGC1A,PRDX2,PTGS2,RAMP1,RARB,RB1,RUNX2,RXRA,RXRG,SCARB1,SCARB2,SDC4,SLC2A4,SMAD7,ST3GAL5,ST8SIA4,SUCLA2,YWHAG	2182 (20)
mir-103	-2.837	microRNA		0.443	0.00958	ADAM10,AIP,ARNT,CACNA1C,CACNA2D1,CAV1,CDK6,FOXO1,GRN,HIF1A,IL23A,NOTCH2,TP53,WNT3A
TNFRSF11B	-3.686	transmembrane receptor		-1.539	0.00958	BMP2,COL1A1,IGF1R,IL11,IL6,ITGAV,MSX2,NOS2,NOTCH1,RUNX2,SDC1,SPP1,TNFRSF11A,WNT10B	1098 (16)
DRAP1	-1.104	transcription regulator			0.00958	BLOC1S6,DLGAP5,GAPDH,GCSAM,GRK6,H2BC9,ILF2,PDCD7,RPL7A,RPS27,RRAS,SH2D3A,SOD1,TAF5
NTRK1	4.017	kinase		-0.396	0.00958	BCL2L1,BDNF,CALCB,EGR1,GADD45A,H2AX,LGALS1,NR4A1,SCN9A,SCRIB,SOD2,TP53,TSC22D1,WNT5A	1408 (18)
GNL3	1.773	other		-0.645	0.00958	CDKN1B,CDKN2B,CDX2,EOMES,FGF5,GATA4,GATA6,KRT18,LATS2,MSX1,NKX2-5,POU5F1,RB1,TP53	1633 (7)
FGFR2	-0.41	kinase		-0.996	0.0096	AMN,AMOT,BMP4,CCN5,CCND1,CDH1,CITED1,COL1A1,COL3A1,COL4A1,COL4A2,CTSC,CTSH,DKK1,DLX2,DRAM1,EN1,ENPEP,FAS,FN1,FOXQ1,FST,GASK1B,GATA6,GLIPR1,GPR27,GPT2,GRB10,HHIP,ICAM1,IL1A,IL1B,KBTBD11,LAMA1,LAMB1,LGR5,MAGEA3/MAGEA6,MBP,MEST,MRAS,MSX2,NEUROG2,NOTCH1,NR5A2,PCOLCE,PITX2,PLAUR,PLXNB2,PTHLH,RUNX2,SOX2,SOX3,SOX7,SPP1,TENM3,VEGFC,ZEB1	1726 (15)
HDAC5	1.359	transcription regulator		0.624	0.00962	ACADL,ACADM,ACSL1,ARC,ATP5F1B,ATP5F1D,AURKA,CASP8,CDK7,CPT1A,CPT2,CTNNB1,DAPK1,HK2,JUN,KLF6,LPL,MBP,MEF2C,NDUFA1,NEDD4,NOS2,NR4A1,PMP22,PPARA,PPARG,PPARGC1A,PTEN,RAD23B,RBBP6,RUNX2,SIX1,SLC2A4,SLC8A1,TAGLN,TNFRSF1A,TWIST1	2594 (20)
PIN1	0.288	enzyme		-1.415	0.00962	ATF4,BCL2A1,CCND1,CCNE2,CDH2,CENPA,COL3A1,CTNNB1,CXCL8,DEPDC1,DNAJB9,EPB41L4B,FBXW7,FN1,HSPA5,IL1B,IL6,MAP1LC3A,MAPK8,MCL1,MIS18A,MMP2,NCAPH,NCOR2,NFE2L1,NOS2,PIMREG,PML,PPARD,PPARGC1A,PTGS2,TBC1D31,TGFB1,TIMP1,TNFRSF10A,TP53I3,XBP1	2081 (19)
LIF	-5.651	cytokine	Inhibited	-3.433	0.00969	AHNAK,AREG,BCL2L1,BMP2,BMP7,CCND1,CD9,CDH1,CDH5,CEBPB,CEBPD,COCH,CSF1R,CXCL2,CXCL8,CXorf56,CYFIP1,CYP26A1,E2F1,E2F2,ECEL1,EGR1,ELF3,ENPP2,ERAP1,FGB,FGF5,FN1,FOXF1,GAL,GATA4,GATA6,GPCPD1,GRAMD2B,HBEGF,HEY1,HIF1A,HK2,HOXC9,HPSE,IFI16,IL1B,IL6,IL6ST,IL7,IRF1,JAM2,JUN,JUNB,KLF10,LARGE1,LIFR,LIMS1,LPL,MEF2C,MSX1,NKX2-5,NMI,OLIG1,OLIG2,PAX6,PIM1,PIM3,POU5F1,PPARG,PTGS2,PTPN1,RASA3,RGS4,RHOU,SNAP23,SOCS…	1558 (16)
isotretinoin		biologic drug	Inhibited	-3.017	0.00982	ABCA1,AGTR1,ALDH1A3,BCL2L1,CD19,CDKN1B,CKS1B,CRABP2,CXCL8,CYP1B1,ELF3,HOXA5,IFIT3,IGFBP3,IL6,IRF1,KLK5,KLK7,NFKB2,OAS1,OLR1,PLAAT4,PRKCA,PSMB10,PTGS2,RARB,RARG,S100P,SLC12A8,SLC6A14,STAT2,TFRC,TLR2,TMPRSS4,TNFAIP2	2506 (22)
oleic acid		chemical - endogenous mammalian		0.585	0.00991	ABCA1,ACADL,ACADM,ACSL1,ANGPTL4,APP,AQP3,ATF4,BBC3,CXCL8,DEGS1,DGAT2,DUSP1,EDN1,EGR1,GADD45A,GADD45B,GAPDH,GDF15,HK2,HMOX1,HSPA5,ICAM1,IGFBP3,IL1B,IL6,LDLR,LPL,MLXIPL,NFKBIA,NOS2,NR1H3,NR4A1,OLR1,PDK4,PLIN2,PLIN3,PNPLA3,PPARA,PPARGC1A,PRKAA1,PSEN1,PTEN,PTGS2,RXRA,SIRT1,SLC2A4,SOAT1,SPHK1,TLR2,UCP2,XBP1	2140 (18)
nitrofen		chemical toxicant		1.682	0.00992	CLCN7,EGR1,EPAS1,FGFR1,FGFR3,FOXQ1,HK1,HYOU1,ITGA6,KCNC3,KCNJ15,KCNJ8,RTN4,SCNN1A,TGFB1I1,TGFBR2,TGFBR3,TIMP2,TIMP3,VEGFA
PLIN5	1.543	other		-0.859	0.00992	ABHD5,ACADL,ACADM,ACADVL,ACOX1,ATF4,COL1A1,ESD,GSS,HMOX1,MAFK,NFE2L2,NQO1,PDK4,PNPLA2,PNPLA3,PPARA,PPARG,PPARGC1A,PPARGC1B	1517 (10)
CIDEC		other		-1.394	0.00992	ACADL,ACADM,ACADS,ACOX1,CES3,CPT1A,CYCS,DGAT1,DGAT2,EBF2,FOXC2,IL6,LIPE,PNPLA2,PPARA,PPARG,PPARGC1A,PPARGC1B,SDC1,SREBF2	1549 (11)
tempol		chemical drug	Activated	2.294	0.00992	BCL2L1,BMP4,CAT,CXCL2,CXCL8,CYCS,F3,FOXM1,ICAM1,NOS2,NR3C2,PLAUR,PTEN,PTGS2,SGK1,SOD2,SPP1,TGFB1,TP53,UCP2	1798 (16)
WWTR1	-2.146	transcription regulator		-0.192	0.00994	BMP2,CASP3,CCN1,CCN2,COL1A1,CXCL1,CXCL2,CXCL3,CXCL8,DTYMK,FN1,ICAM1,IL1A,IL1B,IL6,LAMA5,LATS2,NEGR1,NF2,POU5F1,RRM1,RRM2,RUNX2,SMAD7,SPP1,TK1,YAP1	1177 (12)
MAVS	-0.917	other	Inhibited	-3.683	0.00997	ALPL,CGAS,CMPK2,CXCL2,CXCL8,DDX58,DHX58,IFIT1,IFIT2,IFIT3,IFITM3,IL1B,IL6,IRF7,ISG15,ISG20,KLRG1,MSX1,MSX2,NFKB1,OAS1,OAS2,OASL,PARP12,RSAD2,SOCS3,SOX2,SPP1,STAT1,STAT2,UBE2L6,USP8,ZC3HAV1	844 (13)
elaidic acid		chemical - endogenous mammalian		-0.246	0.01	ACLY,ACOT1,ACOX1,ACSL1,ACSL4,ADIPOR1,AOX1,ATP5F1B,CD9,DGAT1,DGAT2,DHCR7,DHRS3,ECI1,FABP5,FDFT1,FDPS,GNE,HSD17B7,IDE,IDI1,IL6,LDLR,LIPA,LIPH,LPP,LSS,MVK,NPC2,PCSK9,PHGDH,PIK3C3,PNPLA3,PPP4R3B,PRPF19,SCNN1A,SGPL1,SOAT1,SQLE,SREBF2,SUCLG2,TFPI
capsaicin		chemical drug		-0.21	0.0101	ABCC3,ATF4,BCL2L1,BDNF,CALCB,CASP3,CAT,CCND1,CDKN1B,CXCL3,CXCL8,EGFR,ERBB2,GDF15,HMOX1,IL1B,MMP14,MMP2,NOS2,PPARA,PPARD,PPARG,PTGS2,RHOA,RXRA,TAC1,TCF4,TGFB2,TRPV1
12-(3-adamantan-1-yl-ureido) dodecanoic acid		chemical reagent		-1.091	0.0101	BCL2L1,BCL2L2,BCLAF1,BID,BIK,BIRC3,BIRC5,BNIP2,BOK,CARD6,CASP3,CASP4,CASP6,CASP7,CASP8,CFLAR,CIDEB,DFFB,FAS,LHX4,MCL1,NFKB1,PRDX2,PYCARD,RIPK2,TNFRSF10A,TNFRSF1A,TP53BP2,TP73,TRADD,TRAF4
BCL2L1	-3.392	other		-0.025	0.0101	AIFM1,ALOX5AP,BAK1,BCL2L1,BIRC2,CASP3,CD19,CDC6,CDKN1B,CFLAR,COL6A2,CXCL1,CXCL3,CXCL8,CYCS,DHFR,ECM1,FAS,FN1,GSR,IL1B,ITGA3,ITPR1,MCL1,MSX1,NEUROG2,NQO1,TIMP1,TNFRSF10A,TNFRSF1A,TNFRSF21
UPF2	0.183	other		0.438	0.0102	BAG1,CACNB2,CAMK2N1,CYFIP2,DSP,GRN,HEY1,KANK1,KHDRBS3,MPPED2,NEO1,NRP1,PTGS2,PTPN21,TFR2,TNFAIP3,TSPAN12
PRKAR1A	-1.138	kinase		0.002	0.0102	BAK1,CCND1,CDH1,EGFR,ERBB2,ERBB3,GATA4,NKX2-5,PPARG,PRKAR1A,PRKAR2B,RAB25,SMAD3,TEAD1,TUSC3,VDR,VIM
APEX1	0.272	enzyme		1.004	0.0102	ABCB1,ABCB10,ABCC1,EGR1,FTH1,GFRA1,HTRA1,IL1A,IL6,JUNB,NPTX2,NR4A1,PTGS2,RGS4,SIRT1,TP53,VEGFA
4-(2-aminoethyl)benzenesulfonylfluoride		chemical - protease inhibitor		1.379	0.0102	CASP4,COL1A1,CXCL8,ENPP2,FBN2,FN1,HMOX1,HSD17B11,HSPA5,MATN3,MITF,PHEX,SERPINI1,SOD2,TAGLN,TNC,TNFRSF14
crocidolite asbestos		chemical toxicant		-1.856	0.0102	CCND1,CXCL2,EGFR,FOSL1,FOSL2,GADD45A,GCLM,JUN,JUNB,LIF,MET,NOS2,PRKCD,SPP1,SRC,TNFRSF1A,ZYX
PTGER4	-3.231	G-protein coupled receptor	Activated	2.571	0.0103	APP,CDK6,CMPK2,CXCL8,CXCR4,DAXX,DDX58,EDN1,EGR1,GBP2,GBP4,GBP6,GDNF,GPR85,HAS2,HERC6,ICAM1,IFI16,IFI35,IFIH1,IFIT2,IGF2BP2,IL18,IL1B,IL23A,IL6,IRF1,IRF7,ISG20,LHFPL2,LPAR6,MAFB,MAFF,MMP2,MXI1,NCF2,NOS2,NXPE3,OLR1,PDCD4,PDGFB,PTGS2,RASSF2,RNASEL,RNF144B,RNF213,RNF24,RSAD2,RTP4,RUNX2,S100P,SHISA3,SLC13A3,SLFN5,SPP1,ST8SIA4,STXBP4,TAGAP,TAGLN2,TBC1D4,TP53INP1,TRIM21,XAF1,ZFP36L1
LCN2	-7.182	transporter	Inhibited	-2.41	0.0104	ACTL6A,ACTN1,ANLN,ATF5,BMP2,CAPG,CDH1,CDH2,CKAP2,COL1A1,CORO1C,CXCL2,CXCL3,DIAPH1,FAS,HIF1A,HMOX1,IL15,IL1A,IL1B,IL23A,IL6,KIF23,LDLR,MIF,MMP2,MSN,NOS2,NR1H2,PPARGC1A,PTEN,RARB,RUNX2,RXRA,SOD2,SPP1,TAGLN2,TGFB1,TWIST1,VIM
SB-431542		chemical reagent	Activated	2.259	0.0104	ASCL2,BGN,BMP4,BMP6,CCN2,CCND1,CD14,CDH1,CDX2,CHRM3,COL1A1,DVL3,EOMES,ETS2,FN1,FST,GADD45B,GAL,GATA2,GJB6,HAND1,ID1,ID3,IGFBP7,IL1RAP,KCNJ8,KRT18,LINC00842,MAFB,MIXL1,MMP2,MSX2,PAX6,PITX2,POU5F1,PTPRK,RHOA,RUNX2,SERPINB2,SMAD2,SMAD7,SPP1,SPSB1,STAT3,TFRC,TGFB1,TGFB2,TGIF1,TJP1,TNFRSF12A
RPTOR	-0.169	other		1.367	0.0105	ACADL,ACADM,BIRC5,CASP1,CCND1,CD207,CDH1,CDK2,CDK6,CSF1R,CTNNB1,DHCR7,DUSP6,FDFT1,FDPS,FGF2,HIF1A,HK2,HSD17B7,IDI1,IL1B,IL6,IRF8,IRS1,JUN,LBR,LSS,LY75,MSMO1,MVK,NLRP3,NOS2,OLIG1,PKM,PTEN,PYCARD,RPS6,RUNX2,SLC2A1,SLC2A4,SPTLC1,SPTLC2,SPTLC3,SQLE,SREBF2
GSK3B	-1.451	kinase		-1.708	0.0106	APP,ATP2A2,BCL2A1,BCL2L1,BIRC2,BIRC3,BIRC5,CCND1,CCNE2,CD82,CDC25A,CDC6,CDKN1B,CFLAR,CSF2,CTNNB1,CXCL8,EMD,GATA4,GFI1,GLI1,H2AX,HIF1A,IFT27,IGF1R,IL1B,IL6,IRS2,KIF3B,LAMB1,MAP4,MAPRE1,MCL1,NFATC1,NFE2L3,NFKBIZ,NKX2-5,NOS2,PDX1,PMP22,PTGS2,RAC1,RND2,SH3GLB1,SIRT1,SLC16A1,SNAI2,SPP1,SQSTM1,TCF4,TET1,TP53,TUBB4A
Laminin (complex)		complex		-0.324	0.0107	APP,BIRC3,CCND1,COL1A1,EGFR,ETS2,ETV5,FN1,ITGA6,ITGB1,MAPT,PLAU,PTGS2,PTPRF,PXN,RPSA,RUNX2,SDC4,SNAI2,TGFB2,VIM,WNT5A
SRSF2	0.431	transcription regulator		0.463	0.0107	APP,ATF4,AURKA,CCND1,CDH1,COL1A1,EP300,HNRNPH1,HNRNPL,HSD3B7,MAGOH,MAPT,MLXIPL,MST1R,PLK1,PPARA,RRM2,RYR2,SRSF1,SRSF7,TNFRSF10A,VIM
TRAF2	-0.011	enzyme		-1.774	0.0107	ADM,ANXA4,AURKA,BIRC2,BIRC3,CARMIL1,CCNB1,CDK1,CFLAR,CHKA,CSF2,CXCL2,CXCL8,CYLD,EFNA1,EGFR,EPCAM,FAS,ICAM1,IKBKE,IL6,ITGB1,MAPK8,NFKB1,NOS2,PDE8A,PLBD1,PLK1,PPARGC1A,PRNP,PTPN14,PYGL,REEP3,RHBDF1,SNRNP25,TK1,TNFAIP3,WEE1
CaMKII		complex	Inhibited	-2.238	0.0108	BDNF,BIRC3,CDKN1B,COL2A1,DLG1,HAS2,IL1B,INSR,IRF1,SLC2A4,SLC8A1,SOX9,TP53
DOT1L	0.608	phosphatase		-0.555	0.0108	EDN1,GATA2,HOXA10,HOXA9,IRAK3,LMO4,PABPC1,POU5F1,PPIA,RPS2,SCNN1A,TUBA1C,UBB
EIF4G2	0.304	translation regulator		0.466	0.0108	ACTB,CTSD,EGLN1,ESRRB,HIF1A,JUN,KLF5,POU5F1,PTGS2,SERPINE2,SOX2,TBX3,TFCP2L1
PTAFR	-4.172	G-protein coupled receptor		-0.055	0.0108	BIRC5,CDH1,CDH2,CXCL2,CXCL8,EGFR,IL1B,IL6,MCAM,MMP2,PTGS2,VIM,ZEB1
EPCAM	-6.548	other		-0.906	0.0108	CCND1,CCNE2,CDH1,EGR1,EPCAM,FABP5,FHL2,FOSL1,ID1,JUN,POU5F1,SNAI2,TP53
HSP90AB1	0.04	enzyme		-1.554	0.0108	ABCC1,BCL2L1,CFLAR,EPAS1,HIF1A,KCNJ11,NOS2,NOX5,POU5F1,PTK6,SNAI2,STIP1,WT1
selenomethylselenocysteine		chemical - endogenous mammalian		0.832	0.0108	ABCC1,CXCL3,DRG1,EGR1,JUN,PLAUR,PSMA7,PSME1,RPS11,RPS12,SOD1,TIMP2,TIMP3
BDNF	-4.695	growth factor	Activated	2.365	0.0108	ADAM17,ADRB2,AGRN,ALDH7A1,ANXA2,APP,ARC,ATP2A1,ATP2A2,ATP5MC2,BAG3,BCL2L1,BCL2L2,BDNF,BHLHE40,BID,BMP2,BMP7,CASP3,CAV2,CCN1,CDADC1,CRMP1,CXCR4,CYGB,DPYSL3,DUSP1,DUSP4,DUSP6,EEF2,EGR1,FLNA,FLNB,FRMD6,FTL,GDA,GNAI1,GNAO1,GPC4,GRB14,GRIN2C,HOMER1,HSPA4L,HSPA5,IFRD1,IL6,ITPR1,JUN,KIF1A,KIF21B,KIF5A,KLF10,LAMC1,LGALS1,LIMK1,MACROD1,MAN2A1,MAP1B,MAPK1,MAPK8IP3,MAPT,MBP,MYH3,MYO5A,MYO6,NAB2,NCAM1,NELL2,…
MAP3K8	-1.58	kinase		-0.858	0.0109	ACP3,ADCY7,BIRC3,BMP1,CACNB3,CASP8,CBFB,CDKN1B,CEBPD,CFLAR,CLIC5,COBLL1,COLEC12,CREBL2,CSF2,CXCL2,CXCL3,CXCL8,DNAJC2,DUSP6,ECI2,FLNB,GFI1,GNG4,GPR176,HIP1,IER3,IER5,IFNGR1,IGF1R,IL12A,IL18,IL1A,IL1B,IL23A,IL6,IRF2BPL,JUN,JUNB,KIF5C,MRTFA,P2RY1,PAXBP1,PPARGC1B,PTGER4,PTGS2,RAB3A,RGS3,RHOF,SBK1,SDR42E1,SH3D21,SIX1,SLFN12L,SOCS3,SPATS2L,TAPBPL,TDRKH,TICAM1,TIMELESS,TSPAN33,TUBB2B,TXNIP,UBALD1,UBE2B
RUNX1	-3.461	transcription regulator		0.557	0.0109	ADAMTSL4,ADD2,ADGRG1,ALCAM,ANXA2,BBC3,BCL2L12,BDH1,CCND3,CDKN1B,CDKN2B,CSF1,CSF1R,CSF2,CYB561,DEPTOR,ENG,EP300,EPAS1,ERMAP,FAS,FHDC1,GATA2,GNA15,GNL3,GPAM,GPATCH4,HEY2,ICAM2,IFITM3,IGFBP3,IL1B,IL7R,IRF7,ISG15,ITGA2,ITGA4,ITGA9,ITGAV,ITGB1,JAM3,KIT,KRT80,LMO4,MACROH2A1,MAP3K6,MECOM,MET,MIR17HG,MYBBP1A,MYH10,MYH9,MYL9,NCAM1,NOC4L,NR2F2,NR4A3,OAS3,PARP1,PCDH7,PIK3R1,PIM2,PLXND1,PMAIP1,POU6F1,PPAN,PP…
herbimycin		chemical - kinase inhibitor	Activated	3.729	0.0111	ATP2A3,BCL2L1,CCN2,CCND1,CCND3,CDH1,CDK6,CDKN1B,CXCL8,CXCR4,DUSP1,ICAM1,IL1B,IL6,IRS1,JUNB,MMP2,NOS2,PLAU,PTGS2,SIRPA,SOD2,TAGLN,TNFRSF1A
5-hydroxytryptamine		chemical - endogenous mammalian	Inhibited	-2.246	0.0112	ALDH1A2,AP2S1,ARC,ARHGEF1,ASIC1,ASIC3,BAD,BDNF,BIN1,CCN2,CFL1,CXCL8,CYP1B1,EGR1,EIF4EBP1,F3,FGF2,GAD1,GDNF,GNAI2,GNB2,GTF3A,HBEGF,HIF1A,ICAM1,IL1A,IL1B,IL6,MAPK13,MAPK3,MYL6,NCF2,NR3C1,NR4A1,NUCB2,PFN1,PKN1,PLIN3,PPP1CA,PPP2R5D,PTGS2,RAB8A,RPS6KA1,RUNX2,SERPINB2,STX4,TGFB1,TNFRSF1A,TRPV1,TUBA4A,UCP2
CASP1	-9.168	peptidase		-0.116	0.0114	ACOX1,CDH1,COL1A1,CSF2,CXCL2,DFFB,IL18,IL1A,IL1B,IL6,MLKL,NOS2,PPARA,PPARG,PTGS2,RIPK2,RIPK3,SREBF2,VIM
LATS2	-1.425	kinase		1.985	0.0114	ALDH1A3,BBC3,CCNB1,CD14,CD24,CDH1,CLDN4,CYP24A1,E2F1,EPCAM,ERBB2,ERBB3,FOXA1,KIT,KRT18,LATS2,PLK1,RRAGD,TP53
Map3k7		kinase		-1.441	0.0114	ALX1,BCL2L1,BHLHE40,BMP4,CASP3,CMPK2,CSF2,CXCL3,EDN1,GAS1,HAS2,HBEGF,ID4,IFIT2,IL15,IL15RA,IL1B,IL6,ISG15,ISG20,JUN,MLLT3,MVK,NFKBIA,NFKBIZ,PTGS2,RSAD2,RUNX1T1,SPHK1,TLR3,TSC22D1,WNT11
mir-223		microRNA		-0.609	0.0115	ABCA1,ABCA13,ABCB1,ALCAM,AMPD3,C15orf48,CACNA2D2,CARD11,CARM1,CD274,CSF1,DNAJC6,E2F1,EMP1,EYA1,FAM20C,FBXW7,GALC,GASK1B,GFPT1,ICAM1,IFI16,IGF1R,IL1A,IL1B,IL23A,IL6,INPP5J,KIFBP,LEF1,LMO2,LPL,MCTP2,MEF2C,MLKL,MREG,MSMO1,MT1E,MYO1D,MYOF,NLRP3,NQO1,PARP1,PGAP1,PURB,RAB38,RIPK3,SCARB1,SERPINB2,SGPL1,SLC16A7,SLC2A4,SLC40A1,SOAT1,SP3,STAT3,STMN1
APOA1	2.047	transporter		0.883	0.0115	ABCA1,ADCY1,APP,ATP5F1B,CAV1,CHKA,CYC1,HSPA5,ICAM1,IL1B,IL6,INSIG1,LCAT,MFN2,MLXIPL,MYD88,NOS2,OPA1,PCYT1A,PPARGC1A,PTGS2,RAC1,SCARB1,SLC2A1,SOD2,TGFB1,TLR2,XDH
IFNA1/IFNA13		cytokine	Inhibited	-4.289	0.0115	CD274,CXCL11,DHX58,EIF2AK2,IFI27,IFI6,IFIH1,IFIT1,IFIT2,IFITM1,IL1B,IRF1,IRF7,ISG15,MX1,OAS1,OAS2,PLAAT4,PLSCR1,PTGS2,RSAD2,STAT1,STAT2,TLR3,UBE2E1,UBE2L6,VEGFB,ZBP1
ACTL6A	-0.685	other		-1.069	0.0116	BAD,BBC3,BCL2L1,CCNB1,CCNB2,CCND1,CCNE2,CCNG1,CDH1,CDK2,CDKN1B,ETS2,FAS,HMOX1,MCL1,TP53INP1
mir-135		microRNA	Activated	2.918	0.0116	ALOX5AP,CASP1,CDH1,CDH2,CXCL12,EDN1,HIF1A,HOXA10,IL11,IL1B,IL1R1,MCL1,MTSS1,PTHLH,RUNX2,SPP1
MEL S3		chemical - kinase inhibitor		-1	0.0116	ACTB,ATP5F1B,ATP5F1D,C1QBP,CALU,COX5A,EGR1,ETFA,GLOD4,GLUD1,HNRNPL,HSPA1A/HSPA1B,KHSRP,PRDX2,STIP1,VIM
methotrexate		chemical drug		0.452	0.0117	ABCA1,ABCD3,ACACB,ACADM,ACADVL,ACOX1,ACSL4,ACTB,ACTG1,ADIPOR1,ADIPOR2,ANXA4,C1R,C3,CASP3,CASP4,CCND1,CCNG1,CDH1,CFH,CLEC11A,COL4A1,CPT1A,CSF1,CSF1R,CTSS,CTSV,CXCL11,CXCL12,CXCL8,CYCS,DGAT1,DGAT2,DHFR,DUSP1,DUSP10,DUSP14,EPAS1,ESRRA,FAR1,FAS,FKBP3,GAPDH,GPAM,GSN,GSR,HMOX1,ICAM1,ID1,IGFBP3,IGFBP5,IL12A,IL18,IL1A,IL1B,IL6,INSR,ITGA1,LPL,LRP1,MAPK14,MAPKAPK2,MECR,MET,MITF,NOS2,NQO1,NR3C1,NXN,OCLN,OST…
amphetamine		chemical drug		-1.001	0.0118	ATF4,BCL2L1,BDNF,BMP4,CCNC,CD47,CDH2,CREB1,CSF1R,DSG3,EFNB2,EGR1,EZR,F3,FOSL1,FOSL2,GDF1,GNB1,HSPA4,HSPA8,ICAM1,JPT1,JUN,JUNB,MYBL1,NTS,OCLN,PTPN21,RDX,RGS3,SGK1,STIP1,SYP,TAC1,TGFBR2,TLN1,TNFAIP3,TP53,UCHL1
CGP 74514A		chemical - kinase inhibitor		1.982	0.012	CCND1,MCL1,TP53,XIAP
6-dimethylaminopurine		chemical - endogenous mammalian		1	0.012	BCL2L1,EFNA1,ICAM1,MAPK1
Rsk		group		-1.091	0.012	ATF4,CEBPB,CXCL2,CXCL8
ITPR		group		-1	0.012	CYP1B1,IL1B,MAPK1,MAPK3
CC8490		chemical drug		-1	0.012	CXCL8,IER3,IL6,SOD2
Carlr		other	Inhibited	-2	0.012	IL1A,IL1B,NFKB2,PTGS2
LINC00887	-1.606	other	Activated	2	0.012	CDH1,CDH2,VIM,ZEB1
SP6	-2.557	transcription regulator			0.012	AMBN,LEF1,SPHK1,TGFBR2
DGCR5		other		0.087	0.012	AKT1,CTNNB1,EGFR,GSK3B
sepantronium		chemical drug			0.012	BCL2L1,BIRC5,EGFR,MCL1
SF3B1	0.464	other			0.012	ABCB7,MCL1,MDM4,PUF60
CHFR	-1.261	enzyme			0.012	AURKA,KIF22,PARP1,PLK1
LARP1	0.209	translation regulator		-1	0.012	PABPC1,RPL32,RPS20,RPS6
NUP133	1.692	other	Activated	2	0.012	NUP107,NUP153,NUP98,TPR
miR-532-3p (miRNAs w/seed CUCCCAC)		mature microRNA		-0.028	0.012	AKT1,KIFC1,PSMD10,TWIST1
mir-455		microRNA		1.067	0.012	CACUL1,HIF1AN,NDN,RUNX1T1
miR-1285-3p (and other miRNAs w/seed CUGGGCA)		mature microRNA		-0.055	0.012	AKT2,CDH1,TP53,VIM
mir-197		microRNA		0.991	0.012	ACVR1,CTNND1,IL18,TSPAN3
miR-330-5p (and other miRNAs w/seed CUCUGGG)		mature microRNA		0.747	0.012	BCL2L1,CD47,ETS1,SMO
LAMB1	-2.37	other		-1	0.012	DLL4,ITGB1,JAG1,NOTCH1
ANKH	-0.446	transporter			0.012	COL2A1,SOX9,SPP1,WNT5A
TIAM1	0.626	other		0	0.012	JUN,LEF1,RAC1,TIMP1
ABCC9	3.911	ion channel			0.012	HIF1A,PPARGC1A,SLC2A1,XDH
ARSA	2.33	enzyme			0.012	CCNB1,E2F1,MBP,TGFB1
CHRM4	-1.156	G-protein coupled receptor		-1.982	0.012	EGR1,ITGA5,ITGAV,ITGB5
APLP2	-1.976	other			0.012	EGFR,GSK3B,PRNP,TP53
LSINCT5		other		-1.98	0.012	BCL2L1,CASP1,IL1B,STAT3
LPAR3	-0.668	G-protein coupled receptor		-1.987	0.012	CXCL8,EGFR,IL6,KLF5
ARF1	0.947	enzyme		-0.132	0.012	CCND1,E2F1,MCM6,PLA2G6
1-[2,3-bis(furan-2-yl)quinoxalin-6-yl]-3-(4-bromophenyl)urea		chemical reagent		1	0.012	BCL2L1,BIRC5,MCL1,XIAP
methylamine		chemical - endogenous mammalian		0	0.012	FN1,IL1B,IL6,SLC2A1
marimastat		chemical drug		-0.943	0.012	HBEGF,MICA,MICB,MMP14
NSC719239		chemical drug		1.982	0.012	ITGA2,ITGA3,ITGA5,ITGB1
protoporphyrin IX		chemical - endogenous mammalian		0.152	0.012	BAK1,BBC3,FXN,HMOX1
sertindole		chemical drug	Activated	2	0.012	ACTB,APP,HOMER1,MAPK1
BIRC3	-6.032	enzyme		-0.035	0.0121	BIRC3,CSF1,CXCL1,CXCL8,ICAM1,IL1B,IL6,MAP3K14,NFKB2,NFKBIA,TP53,XIAP
dacinostat		chemical drug		0.84	0.0121	BCL2L1,BIRC5,CDKN1B,CEBPD,CFLAR,ELF3,ERBB2,HIF1A,TK1,TNFRSF10A,VEGFA,XIAP
MPZ	-0.112	other			0.0121	ATF4,CDK2AP1,DERL2,DERL3,DNAJC3,ERO1B,FDFT1,HSPA5,JUN,SDF2L1,SOX2,SQLE
SMARCD3	4.094	transcription regulator		0.47	0.0121	ALCAM,COL1A1,COL2A1,DEPTOR,ITGA3,MITF,NKX2-5,PITX2,SOX5,SOX6,SOX9,WNT5A
PPP1R13L	-3.39	transcription regulator		-1.086	0.0121	BBC3,CLDN1,CTNNB1,DSC3,DSP,H2AX,ITGA3,ITGAV,ITGB1,JUP,PERP,SLC2A1
HOXD3	9.648	transcription regulator		-1.646	0.0121	COL1A1,DSP,HOXD10,IGFBP3,ITGA5,JUP,MMP2,NKX2-1,SDC1,TAGLN,TGM2,TSPAN7
RPA1	0.119	other		1.34	0.0121	CNIH3,FAM110B,HSPA1A/HSPA1B,ITGA1,LRRN4,NAV2,RASSF10,SLC44A5,SNCAIP,SYT16,TANC2,TPD52L1
RND3	-2.69	enzyme		-0.962	0.0121	CCND1,CDH1,CDKN1B,FN1,HEY2,HIF1A,MMP2,NOTCH1,PTEN,PTGS2,VEGFA,VIM
NAB2	-1.571	transcription regulator		1.248	0.0121	ALOX5AP,BCAR1,F3,FGF2,FLT1,FN1,HIF1A,ID4,NAB2,PLAU,PPARG,TGFB1
ammonium chloride		chemical drug		-1.585	0.0121	APP,CD9,CTSB,EDN1,FOXO1,GRN,IL1B,IL6,LDLR,NPC1,SQSTM1,ULBP2
MAP3K14	-1.519	kinase	Inhibited	-2.212	0.0122	ADAM8,BCL2L1,BIRC3,CASP3,CFLAR,CXCL1,CXCL2,CXCL8,EGFR,FAS,GADD45A,ICAM1,ICOSLG/LOC102723996,IKBKB,IL15,IL1A,IL1B,IL6,IL7R,NFKB1,NFKB2,NFKBIA,NFKBIE,NOS2,NR1H3,PDE3B,PLA2G4A,PON2,PTEN,PTGS2,RELB,RIPK3,SIX1,SIX2,TNFAIP3,XBP1,YAP1
TLR7/8		group		-1.053	0.0123	BCL2A1,CFLAR,EDN1,MAP3K8,MCOLN2,NFKBIA,NFKBIZ,PLAUR,PLLP,PMAIP1,PNRC1,PTGS2,RECQL4,RGS20,RRP7A,RRP7BP,SLC7A11,TNFAIP3,TRIB3,VDR,ZNF544
Bay 11-7082		chemical - kinase inhibitor	Activated	3.345	0.0125	ABCA1,BCL2A1,BCL2L1,BMP2,CCND1,CXCL1,CXCL2,CXCL3,CXCL8,ELAVL1,F3,FLT1,GLRB,HAX1,HMOX1,HSH2D,HSPA5,ICAM1,ICOSLG/LOC102723996,IL15,IL15RA,IL1B,IL6,IRAK4,MCL1,MMP2,NFKB1,NOS2,PIM1,PRMT5,PTGS2,S100A4,SOD2,TLR2,XIAP
lithium chloride		chemical drug	Activated	2.255	0.0128	ACLY,AHR,AMH,APP,AXIN2,B4GALT1,BCL3,BMP2,BMP4,BMP7,CACNA1G,CCND1,CDC6,CDKN1B,CEMIP2,CTNNB1,DKK1,DLL4,DPAGT1,FDPS,GATA4,GDF15,GDNF,GFI1,GSK3B,HEYL,HMOX1,IDI1,IDS,LEF1,LSS,MAPT,MICA,MMP2,MT2A,NKD2,NKX2-1,NKX2-5,NOS2,NOTCH1,NPEPPS,PER1,PKD1,PLIN2,POU5F1,PPARG,PTGS2,PXN,SOX9,TAGLN,TERT,TP53,VCAN
IFNLR1	-0.928	transmembrane receptor			0.0128	CMPK2,CSF1,CXCL2,CXCL3,IFI44,IFIH1,IFIT2,IFIT3,IL1A,IL1B,IL6,IRF7,ISG15,ITGAV,LIF,MX1,OASL,PTGS2,RSAD2,SOD2,TLR2,TNFAIP2,TNFAIP3
niacinamide		chemical - endogenous mammalian		-0.619	0.0129	AKT1,BCL2A1,CCNB1,CCNI,CCNL1,CD14,CDK12,CDK18,CDK5,CDKL2,CDKN1B,CDKN2D,CDKN3,CNNM3,CXCL12,CXCL8,E2F1,G6PD,GAPDH,ICAM1,IL15,IL6,IRF1,JUNB,KRAS,MCL1,NFYB,NNMT,NOS2,PARP1,PDK4,PMAIP1,PTGS2,RB1,RBL1,RUNX2,SHC1,SIRT1,TP53,UBE2F
EFNA1	-2.423	other		0	0.0131	ABCA12,CCN2,CRABP2,DCBLD2,DUSP4,DUSP6,EP300,EPHA2,EPHA3,ETV5,FABP5,FGF2,FN1,FOSL1,GATA6,HERC6,IRF7,ITCH,KLK7,KRAS,KRT10,KRT18,NEDD4L,NT5E,PTHLH,PXN,SOX9,TGM1,TRIM5,UBE2C,WWP1
hydroxyurea		chemical drug		-1.155	0.0131	ABCB1,BCAM,CCNB1,CCND1,CCND3,CDC45,CDC6,CDC7,CDKN1B,CHEK1,E2F2,EDN1,GADD45A,GINS2,GMNN,H2AX,HJURP,IFIT1,ISG20,KRT18,MARCKS,MCAM,MCM5,MX1,NMI,OAS1,RRM2,STAT1,TK1,TP53,TP73
SOX17		transcription regulator		-0.234	0.0131	AMN,AP2M1,AXIN2,CCND1,CDC42BPB,COL4A1,COL4A2,CTNNB1,GATA4,GATA6,LAMA1,LAMB1,NR2F1,POU5F1,SLC38A4,SOX2,SOX7,SPARC
ANXA2	-4.273	other		0.468	0.0131	AKT1,CDK6,FAS,GADD45A,IGFBP3,IL6,JUN,MMP2,PCSK9,PPM1D,PTEN,PTGS2,S100A10,SESN2,TP53,TP53I3,ULK2,ZMAT3
KIN001-043		chemical - kinase inhibitor		1.021	0.0131	AMH,CCND1,CDX2,COL1A1,COL2A1,CRABP2,CTNNB1,GRHL2,ID1,LEF1,MICA,MMP2,NR5A2,POU5F1,SALL1,SOX2,SOX9,TFCP2L1
bardoxolone		chemical drug		-0.227	0.0131	BCL2L1,CCND1,CEBPB,CFLAR,CRYZ,FTH1,GCLM,GSR,GSTA4,HMOX1,IRS1,MDH2,NFKBIA,NQO1,SQSTM1,TUFM,UBE2H,UGDH
honokiol		chemical - endogenous non-mammalian		0.143	0.0131	BAD,BAK1,BCL2L1,CCND1,CDH1,CDK2,CDK6,CDKN1B,FLT1,ICAM1,IQGAP1,JUNB,MAP3K8,MCL1,NOS2,PPARG,PTGS2,PTPN6
H2AB3 (includes others)		other		-1.8	0.0131	AQP3,ARC,ATF5,BBC3,BCL2L10,BIK,CHAC1,DCLK1,EFNA1,GAS1,HIP1R,ICAM5,IGFN1,ING1,IRF3,LIPH,MELTF,MSX1,PCDH9,PDZK1IP1,SAA1,SERPINB9,SLC30A3,TMEM217,TNFRSF8
MAC		complex	Inhibited	-2.879	0.0133	AKR1C3,AREG,CASP8,CD59,CXCL2,EGR1,FAM110C,FN1,IRF1,ITPRIP,PTGS2,RGCC,SPP1,TRADD,ZFP36
DTX1	4.212	transcription regulator		0	0.0133	AKT1,AKT2,APPL1,CD82,CEP55,DUSP6,EGR1,GFRA1,HIGD1A,MCL1,SPP1,SPRY4,TGFB2,UHMK1,VEGFA
CTSB	-1.622	peptidase		-1.265	0.0133	APP,BCL2L1,CCND1,COL1A1,CTSB,CTSV,CXCL2,CXCL3,E2F1,IL1B,NOS2,PLAUR,RAC1,SPHK1,VEGFA
AZGP1	-1.379	transporter		0.703	0.0133	BCL2L1,BMP4,CCND1,CDH1,CDKN1B,CEBPB,DSP,EGR1,FBXO32,HK2,ITGA5,LIPE,PNPLA2,SLC2A4,VIM
trabectedin		chemical drug		0.182	0.0133	ABCB1,CCND1,CDK1,COL1A1,G6PD,GADD45A,GNAI2,H1-10,H2AX,IGF1R,MCM5,NXF1,PPARG,SAT1,TK1
SCAP	1.135	other		0.901	0.0134	AACS,ABCA1,ABCA3,ACACB,ACLY,ACSL1,ACSL4,ACSL5,ATF5,CSF1R,DHCR7,FABP5,FDFT1,FDPS,FLAD1,GPAM,HES6,HSD17B1,ID1,IDI1,INSIG1,LDLR,LGALS3,LSS,MSMO1,MVK,OLR1,PCSK9,PDK1,PTGER4,PTGS2,SCAP,SLC7A1,SQLE,SREBF2,STARD4,TM7SF2,TRIB3
CDKN1B	-0.836	kinase		-0.742	0.0135	ADGRE5,APCDD1,ARL10,B2M,B4GALT5,BCL11A,CAPN1,CCNA1,CCND1,CCND3,CDC25A,CDH1,CDK2,CDKN1B,CLPB,DUSP9,EGR1,ELOVL3,EPB41,EPHA2,FHL1,HMG20B,HSPA5,HSPB8,IGF2BP1,LEF1,LGALS3,LGR4,LHX1,MCL1,MCM5,MCM7,MEIS2,MMP16,NDEL1,PALD1,PES1,RAB3A,RUNX1,RYR2,SELENOP,SLC9A1,SMAD7,SOX2,STAT3,TCF4,TENM4,TK1,TWIST1,TWISTNB,WNT3
allopurinol		chemical drug	Inhibited	-2.384	0.0135	ANXA1,ANXA2,BDNF,BIRC3,CAT,CD14,CLDN4,EFEMP2,ELF3,F3,FBLIM1,FGB,FXYD5,GTPBP4,HIF1A,HMOX1,IER3,IL1B,IRAK1,IRAK4,LGALS3,LXN,MCM3,PSMB10,PSMB8,PTGS2,RBM3,RCN1,S100A10,S100A11,SLC2A1,SLC9A3,SPP1,STING1,TES,TGIF1,TIMP1,TLR6,TMSB10/TMSB4X,TNFRSF12A,TXNIP,UPP1,VIM
15(S)-HETE		chemical - endogenous mammalian		-1.419	0.0136	EGR1,F3,FGF2,FOSL1,JUN,MAPK1,MAPK3,MMP2,NOS2,PPARG,PTGS2
SMYD3	-0.108	enzyme		1.038	0.0136	CCNA1,CEBPD,CTSD,ECEL1,GREB1,NKX2-5,NKX2-8,PIK3CB,RBM38,TERT,WNT10B
LYL1	-4.688	transcription regulator		-1.762	0.0136	ADGRG1,BCL2L1,CCND3,CDH5,EGR1,ID1,ID3,ID4,ITGA2,NFKB1,TAL1
ARHGDIG	8.65	other	Activated	2.714	0.0136	ALCAM,ANO9,ANXA1,DUSP6,EDN1,JUP,KANK1,LPAR1,MARCKS,OXLD1,PALLD
miR-9-5p (and other miRNAs w/seed CUUUGGU)		mature microRNA		0.418	0.0136	CDH1,DIAPH1,FOXG1,FOXO1,JAK2,NFKB1,ONECUT2,PMP22,PRDM1,REST,SYTL4
EREG	-11.211	growth factor	Inhibited	-2.182	0.0136	AREG,BTC,CXCL2,FGF2,HAS2,HBEGF,IL18,IL6,PTGS2,TGFA,TNC
IFITM1	-2.045	transmembrane receptor		0.47	0.0136	ANXA10,DDAH2,EDIL3,GPM6A,LEPR,MAPK1,PLAAT4,PRDM2,SELENOP,SERPINE2,TP53
superoxide		chemical - endogenous mammalian		1.188	0.0136	CAV1,FN1,HMOX1,ICAM1,ID3,IL1B,IL6,MARCKSL1,PTGS2,SOD2,TIMP1
thiazolidinedione		chemical drug		0.095	0.0136	CAP1,CTNNB1,IRS1,IRS2,NFATC1,NR4A1,NR4A3,PIK3R1,SORBS1,SPHK1,UCP2
irinotecan		chemical drug		-1.019	0.0136	BCL2L1,CDH1,FAS,IL18,IL1B,IL6,NOS2,PMAIP1,SNAI2,TP53,UBE3A
GFI1	3.942	transcription regulator	Activated	2.52	0.0136	AKT1,ANXA6,BAK1,BBC3,BCL3,CARD6,CASP1,CASP8,CDKN1B,CFLAR,CHD7,CREBBP,CSF1,CXCL8,CXCR4,DDB2,DGKG,E2F5,EIF2AK2,ETS1,ETS2,FOSL2,FOXO1,GFI1,HPRT1,ICAM1,IKBKB,IL1A,IL1B,IL1R1,IL6,IL7R,IRF1,ISL1,JUN,LPAR1,MAFB,MAFF,MAP4K5,MAPK3,NFKB1,NFKB2,NFKBIA,NLRC5,NT5E,PER3,PTEN,RAF1,RAPGEF4,RB1,RELB,RIPK2,SERPINA1,SGK1,SMAD3,STAT1,TBK1,TESC,TNFRSF1A,TNFRSF25,TNK2,TRADD,VDR
MAP2K1/2		group	Inhibited	-2.376	0.0138	ARC,ARG2,BDNF,C3,CCN2,CCND1,CDH1,CDK1,CDKN1B,CXCL3,DUSP1,DUSP4,EGR1,FOSL1,FURIN,H2AX,HK2,HMOX1,HSPA5,HSPB1,IL1B,JAG1,JUN,KLF5,MCL1,MIR155HG,NFKB1,NOS2,PDGFA,PHLDA1,PPARA,PRKCI,RRM1,SCARB1,VEGFA,VIM
TBX5		transcription regulator		0.913	0.0138	ACTN2,ANKRD1,ATP2A2,BCL2L1,BIRC5,CACNA1C,CCBE1,CLSTN2,COL1A1,COL3A1,CXCL2,CXCL8,CXCR4,GATA4,HEY2,IFI16,IL11,IL6,IRX4,MEF2C,NFATC4,NKX2-5,OXSR1,PDLIM3,PHKA1,PTGS1,PTGS2,PTPRB,RYR2,S100A4,SCN5A,SIK1/SIK1B,SLC8A1,TCF7,TPM1,VIM
DYSF	-4.661	other			0.0138	ABCA1,ABRACL,ACOT9,ACTG1,ACTR3,ANKRD1,ANXA1,ANXA2,ARPC2,B2M,CFD,CHMP1A,CORO1C,CTSH,CTSS,CTSV,EHMT2,ERRFI1,FN1,FTL,GDF11,GNAI3,HLA-A,HSPA1A/HSPA1B,HSPB1,IFI16,ITGB1,LGALS3,PRPF4B,PRSS23,PSAP,S100A4,TCEAL9,TIMP1,TMEM123,UGT1A6
sphingosine-1-phosphate		chemical - endogenous mammalian	Inhibited	-3.165	0.0141	ALPP,ANXA2,CCN2,CCND1,CDH1,COL3A1,CXCL2,CXCL8,EGFR,EGR1,ENPP2,ETS1,FAS,FGF2,FN1,GATA6,HAS2,HIF1A,ICAM1,IL6,JUN,KCNH2,KLF5,MMP14,MYD88,NFE2L2,NOS2,NRP1,NRP2,PDGFA,PDGFB,PPARGC1B,PTGS2,RUNX2,RXRA,SPHK1,TAGLN,TGFB1,TIMP1,VEGFC,VIM
GNB1	-0.837	enzyme			0.0141	AHR,ARC,CXCL3,DGAT1,DUSP1,FOSL2,IER3,IL1B,JAG2,MAFB,MBTPS1,MXI1,NFKB1,NR4A1,PLAU,PLK2,PRDM1,PTGER4,THBD,TSC22D3
ATP		chemical - endogenous mammalian		-1.893	0.0142	ADAMTS9,AHR,BDNF,BIRC5,CALCB,CAPN1,CAPN2,CASP1,CCND1,CD14,CDH1,CDKN1B,CLDN1,CXCL2,CXCL8,CXCR4,DUSP1,F3,FLNA,FOXO1,FZD8,GCLM,H2AX,HBEGF,HIF1A,HK1,ICAM1,IL1B,IL23A,IL6,ITGA4,MBP,NFATC1,NKX2-1,NLRP3,NOS2,NR4A1,NRP1,P2RY2,PAX6,PLD2,PTGS2,SAT1,SPHK1,SREBF2,TP53,TRPC3,TRPV1,TXNIP
RBPJ	0.269	transcription regulator		1.795	0.0143	ARHGEF4,AXIN2,BMP2,BMP3,BMP7,CCND1,CDCA7,CDKN1B,CSF1,CSF2,CTNNB1,CXCL12,DLL4,DUSP1,ECT2,EPHA4,ETS1,FBXL19,FGF13,FGF2,FGF5,FGF9,GDNF,GNA12,GNAI1,HAS2,HEY1,HEY2,HOXD1,HOXD3,IKBKB,IL12A,IL18,IL1B,IL6,IL7R,IRF8,JAG1,JUN,LEF1,LFNG,LIF,MAPK14,MAPK6,NEUROG2,NFATC1,NFATC3,NFKB1,NRARP,NTF4,PDGFB,PRDM1,PRKAR2A,SDC1,SLC2A1,SOX2,SOX9,TGFB2,TNC,UNCX,VEGFA,VEGFC,WASF1,WNT5A
NOD2	-0.575	other	Inhibited	-2.026	0.0143	ACSL1,ALDH1A2,AREG,AXIN2,BCL2A1,BMP2,CXCL2,CXCL3,CXCL8,ICAM1,IER3,IL18,IL1A,IL1B,IL23A,IL6,LMO4,MAP3K8,MARCKSL1,MCOLN2,NFKB1,NFKB2,NFKBIA,NOS2,NR1H3,PTGES,SLC2A6,SOCS3,SOD2,TANK,TNFAIP3,TWIST1,WNT3A,XIAP
methamphetamine		chemical drug		-1.418	0.0143	ABCC1,BAD,BCL2L1,BDNF,BID,BMP7,CAST,EGR1,FAS,FOSL2,HMOX1,HOMER2,ICAM1,IGF1R,IL1A,IL1B,IL6,JUN,LGALS1,MAOA,MMP2,NAT8L,NR4A1,NTRK2,NTS,OCLN,OTX2,PCLO,PPP3CA,SIGMAR1,TAC1,TIMP2,TNFRSF1A,UQCRC2
mifepristone		chemical drug		-0.802	0.0143	ABCB1,ABCC3,ADAM15,ADM,ALPL,ANXA1,AREG,ARID4B,BCL2L1,BMP7,C3,CALCB,CASP1,CASP3,CASP8,CAST,CAV1,CCN2,CCND1,CD14,CDH2,CDKN1B,CEACAM1,CEBPB,CEBPD,CKMT1A/CKMT1B,CLDN7,COL18A1,COL2A1,CSF2,CTNNA1,CTNND1,CTSD,CTSF,DKK3,DNAJC2,DUSP1,EFNB2,EGR1,EPCAM,EPHB3,F3,FAS,FBLN2,FDFT1,FGF2,FKBP5,FOXA1,FST,FTH1,GAL,GAS6,HAS2,HBEGF,HDAC7,HOXA10,HOXA11,HSPA4,HSPA5,HSPD1,ICAM1,IGFBP3,IL1B,IL4R,IL6,IQGAP1,IRS2,ITGA2,ITG…
KLF11	0.219	transcription regulator		-0.706	0.0144	ACSL5,ADAMTS13,AKT1,APOL6,BMP7,CAT,CAV1,CCN2,CEBPB,CHRM3,CHRNA5,CHRNB1,COL3A1,CPT2,CXCR4,EDN1,ELOVL3,ENG,IL1B,ITGA1,ITGA2,ITGA3,ITGAV,ITGB5,ITGB8,LOX,LTBP1,MMP14,MMP2,NFKB1,PDGFA,PDGFB,PDK4,PDX1,PLA2G4A,PLAU,PPARGC1A,SERPINA1,SERPINH1,SLC25A20,SMAD2,SMAD3,SMAD7,SOD2,STAT1,STAT6,TGFB1,TGFB2,TGFBR2,TGIF1,THBS2,TIMP1,TIMP2,TIMP3,VEGFA
CYP1A1	-1.684	enzyme		0.602	0.0146	ACOT11,ANXA3,ANXA4,ANXA7,AP2M1,CACHD1,CCND1,CDKN2D,CHP1,CNN2,COX6B2,CTTN,CYP26A1,DNAL4,ECI2,ETHE1,GAMT,GPC1,GSTM2,HOXB9,IFNLR1,IGFBP2,LMNA,LMNB2,MAPT,MYO10,NDUFA1,NDUFV1,NEFL,NQO1,PTP4A3,QKI,RACGAP1,RBBP4,SDC1,SHANK2,SLC46A3,SMARCA4,SOCS2,ST3GAL4,TSC22D1,UGT1A6,VAMP8,WEE1
DLL4	3.169	other		1.39	0.0148	CD207,CXCR4,DLL4,EFNB2,EPHB4,FLT1,HEY1,HEY2,LGALS1,MAF,MCM3,MCM7,NFKB1,NFKB2,NOS2,NPM1,NR2F2,NRARP,PDGFB,RELB,UNC5B,VEGFA
HBA1/HBA2	0.996	transporter	Activated	3.411	0.0148	ATP5F1C,ATP5MC1,ATP5MC2,COX15,CYC1,EGLN3,HIF1A,NDUFA3,NDUFA4,NDUFA5,NDUFA6,NDUFB11,NDUFB4,NDUFS4,NDUFS7,NDUFS8,NDUFV1,UCP2,UQCRC1,UQCRC2,VEGFC,VHL
advanced glycation end-products		chemical - endogenous mammalian	Inhibited	-2.295	0.0148	ABCA1,BAD,CASP3,CASP8,CCN2,CXCL12,CXCL8,DDAH2,FGF2,FN1,FOXO1,IL6,LRP2,MKI67,NOS2,PDGFB,PFN1,PTGES,PTGS2,ROBO1,SLIT2,SPP1
U73122		chemical reagent		-0.129	0.0148	AGTR1,ATF4,ATP2A2,DPM3,E2F1,E2F2,E2F3,FN1,HSPA5,ICAM1,MAF,MMP14,MMP2,NFATC1,NOS2,NR4A1,PLCB1,PTGS2,RHOA,SLC17A7,TPM1,XBP1
HOXA10	2.087	transcription regulator		0.591	0.0149	ACTB,ADM,ALDH1A2,ALOX5AP,ALPL,ALPP,ARL4A,B3GALNT1,BCHE,CDKN2B,CFD,CHERP,COL3A1,CSTA,CTSV,DBP,DKK1,EGFR,ELOC,EMX2,ENPP2,FKBP3,FLT1,FN1,FST,FZD5,GAS6,GFI1,HDLBP,HLF,HNRNPL,HOXA11,HOXA5,HOXB3,HOXD9,ID1,IDH2,IGFBP3,IGFBP5,IL11,IL1R1,KLF10,KLF9,KRT18,LEPR,MAP1B,MAPK12,MAX,ME1,MEIS2,MFNG,MICOS10-NBL1/NBL1,MSN,NCAM1,NCF2,NR4A1,NUDT3,P4HB,PHGDH,PIK3R1,PPP1R13L,PRKCD,PTGER4,RNF227,SAT1,SLC27A6,SNRPE,TGFBR…
Mapk		group		-1.367	0.0149	ABCB1,ADA,ADAM12,APLN,APP,ARC,BCL2L1,BDNF,CAT,CCND1,CDKN1B,CEBPB,CFLAR,CLDN4,COL1A1,CXCL1,CXCL8,DBP,EGR1,EP300,F3,FURIN,HMOX1,IL1B,IL6,IRAK3,IRS1,ITGA4,JUN,JUNB,MUC4,NOS2,NR3C1,NR4A3,OLIG2,PER1,PPARD,PTEN,PTGS2,RUNX2,SNAI2,SNCG,SOD1,SPP1,STAT1,UGT1A1,VEGFA
gentamicin C		chemical drug	Inhibited	-3.665	0.0149	ANXA1,ANXA2,BIRC3,CD14,CLDN4,DMD,EFEMP2,ELF3,FBLIM1,FGB,FXYD5,GTPBP4,IER3,IL23A,LGALS3,LXN,MCM3,PSMB10,PSMB8,RBM3,S100A10,S100A11,SPP1,TES,TGIF1,TIMP1,TMSB10/TMSB4X,TNFRSF12A,UPP1,VIM
picropodophyllin		chemical drug		1.929	0.015	CCNB1,CDK1,CDK6,HIF1A,IFITM3,POU5F1,PRDM1,SOX2,WTAP,ZBTB16
HIF1AN	-0.419	enzyme		1.837	0.015	ADM,ANKRD37,BIRC5,CA9,EGLN3,HEY1,HK2,SLC2A1,SOX9,VEGFA
H1-2	0.707	other		-0.393	0.015	ACTB,AXIN2,CCND1,CTNNB1,GADD45A,GAPDH,HSPA1A/HSPA1B,IER3,PHLDA2,PMAIP1
mir-218		microRNA		-1.531	0.015	BMI1,CDH1,CDH2,FZD4,LEF1,NT5E,SASH1,SRC,ZEB1,ZEB2
mir-205	-6.944	microRNA		-1.024	0.015	AXIN2,CDH1,CTNNB1,ERBB3,IL24,IL32,RUNX2,VIM,ZEB1,ZEB2
MAPKAP1	-0.211	other		-1.723	0.015	CXCR4,DAPK1,DAXX,HIF1A,IFI16,IFIT2,OAS2,PHF11,PTEN,SLFN5
MEL T1		chemical - kinase inhibitor		1.265	0.015	ATP5F1B,ATP5F1D,C1QBP,CFL1,COX5A,GLOD4,HIBCH,HSPA1A/HSPA1B,HSPD1,PRDX1
SMURF2	-1.177	enzyme		1.765	0.015	AXIN1,CCN2,CDH1,FN1,JUN,RUNX2,SKIL,SMAD2,SMAD7,TGIF1
RHOB	1.41	enzyme		-1.504	0.015	CXCL8,EGFR,ICAM1,IL6,NFKB1,NOS2,PTGS2,RHOA,RHOB,TGFBR2
4-nitroquinoline-1-oxide		chemical toxicant	Inhibited	-2	0.015	AURKA,CCNB1,CCNB2,CDK1,CDK6,CTNNB1,EGR1,FHIT,PTGS2,TP53
farnesyl pyrophosphate		chemical - endogenous mammalian		-0.184	0.015	ABCA1,APP,BIRC5,ICAM1,LIPG,NOS2,PTGS2,SCARB1,SMAD3,TGFB1
morin		chemical - endogenous non-mammalian		0.711	0.015	BCL2L1,BIRC2,BIRC5,CCND1,COL18A1,NOS2,PTGS2,PTPN6,TIMP1,XIAP
mannose		chemical - endogenous mammalian		0.632	0.015	ATF4,BCL2L1,HAS2,HSP90B1,HSPA5,ICAM1,MCL1,NR3C1,NR4A1,PDIA3
IGF1R	-1.451	transmembrane receptor	Inhibited	-2.336	0.0151	ABCC4,ACADM,ACADS,ACSL1,ACTN4,ADRB2,ANKRD1,ANXA3,APP,ATP5F1B,ATP5F1D,ATP5MC1,ATP5MC3,ATP5PF,BAD,BCL2L1,CALU,CAPG,CBFB,CCNA1,CDH1,CDK1,CDKN1B,CEBPB,COL18A1,COL1A1,COL3A1,COL4A1,COL4A2,CPT2,CTNNB1,CTNND1,CTSD,CYCS,EDN1,EGR1,FLNC,FTH1,GCK,GLI1,GPER1,GRB10,HIF1A,HSPA5,HTRA1,IGF1R,IGFBP2,IGFBP3,IGFBP4,IGFBP5,IL1B,IL6,IRS1,IRS2,KIF20A,KRT6B,LASP1,LIPE,LPL,MAPK14,MFN2,MYOM2,NDN,NDUFA1,NDUFA3,NDUFA4,NDUF…
grape seed extract		chemical drug		1.707	0.0151	APP,BCL2L1,CCNB1,CCND1,CDK2,CDK6,CKB,CREB1,CTNNB1,HSPA8,HSPD1,MKI67,NOS2,NR3C1,PLAU,PTGS2,VIM
HOXC8	9.863	transcription regulator		0.455	0.0151	ADAM19,ANKRD1,APP,ELMO1,EMB,FZD2,GAS1,GREM2,HES2,HOXC8,MSLN,NQO1,PLAGL1,PMP22,RARB,SPP1,TAGLN
IL24	-8.718	cytokine		-1.871	0.0151	BAK1,BATF2,BCL2L1,CASP3,CASP8,CCND1,CXCL8,EIF2AK2,FAS,GADD45A,HBEGF,HSP90B1,HSPA5,IL12A,IL23A,IL24,LIG4,MCL1,NOS2,PRDM1,PTGS2,XBP1,XRCC4,XRCC6
HSP90B1	-0.754	other		-1.077	0.0151	ARF1,ARF3,CALR,CANX,EIF5A2,HSP90B1,HSPA5,IL18,IL1B,IL23A,IL6,ITGA4,NOS2,RAB10,RAB2A,RAB8B,RPL12,RPL27A,RPLP2,RPS14,RPS20,SNX3,SSR3,TLR2,TOMM20,VAMP2,VAMP8,XBP1
emodin		chemical drug		0.435	0.0151	ABCB1,ABCC1,BIRC5,CDH1,CLDN4,CSF1R,CXCL3,CXCL8,CXCR4,CYP1B1,ERBB2,ERCC1,FN1,HLA-DOA,HSPA5,ICAM1,IL1B,IL6,IRF5,LPL,MKI67,MMP2,NOS2,OCLN,SOD1,SOD2,TWIST1,VIM
platelet activating factor		chemical - endogenous mammalian	Inhibited	-2.117	0.0152	CDH1,CDH2,EGR1,F3,FGF2,FN1,GAS6,ICAM1,IL1A,IL6,MMP14,MMP2,NFKBIA,NOX5,NR4A1,PAFAH1B2,PLA2G7,PLAU,PLAUR,PTAFR,PTGS2,SOCS3,TIMP1,TIMP2,VEGFA,VIM
LPL	5.324	enzyme		-0.395	0.0152	ACOX1,CASP3,CPT1A,CSF1,CXCL8,GBP1,ICAM1,IL1B,IL6,IRS1,IRS2,LDLR,LIPE,LPL,PDK4,PNPLA2,PPARA,PPARG,PPARGC1A,PRKAA2,SCARB1,SLC2A1,SLC2A4,TGFB1,UCP2,VEGFA
LMNB1	0.397	other		0.342	0.0152	ACTN4,ATP5F1B,B2M,CCN5,CXCL12,DDB1,DHCR7,ELOVL7,ERCC6,FBN1,GPC4,HBEGF,LARGE1,LDLR,LMNA,LMNB2,MGST1,MSMO1,PLIN2,POLM,RCN1,REEP5,SERINC1,SQLE,TGFB2,THBS2
carbonyl cyanide m-chlorophenyl hydrazone		chemical toxicant	Inhibited	-2.737	0.0152	ALOX5AP,ATF4,BMP6,CLDN1,CTSV,CXCL8,DUSP5,EPHB1,ERRFI1,GDF15,GK,HK2,IGF1R,IL1A,IRF3,KRT34,NFKBIZ,PHLDA1,PTGS2,RND3,SPRR2D,SPX,ST6GALNAC3,TGFB1,TMEM154,ZFP36L1
plumbagin		chemical toxicant		1.236	0.0152	BAK1,BCL2A1,BCL2L1,BIRC2,BIRC3,BIRC5,CCND1,CFLAR,GSK3B,IL6,PTGS2,PTPN6,TNFRSF10A,TP53
Smad		complex		-1.95	0.0152	ANGPTL4,CCN2,CDKN2B,COL1A1,EGLN1,GLI2,ID1,ID3,INPP5D,MCL1,PTHLH,SMAD7,VEGFA,WNT5A
mir-9		microRNA		-0.269	0.0152	CAMTA1,CDH1,CTNNB1,CXCR4,ETS1,FOXG1,JAK2,MEIS2,NFKB1,PAX6,PMP22,PRDM1,RUNX1,RUNX1T1
HEXIM1	-0.623	transcription regulator	Activated	2.966	0.0152	ANXA1,BBC3,CCND1,COL1A1,FGF2,FGF9,HIF1A,HNRNPH1,LOXL2,MAGOH,SLC2A1,TGFB2,TP53,VIM
COMMD1	-0.803	transporter		-0.102	0.0152	ATP7B,BIRC3,EGLN1,EGLN3,HK2,NFKBIA,PDK1,PFKFB3,PFKP,STAT1,STC2,TFRC,TLR1,VEGFA
BTG2	0.414	transcription regulator	Activated	2.475	0.0152	CAT,CCND1,CXCL1,CXCL3,DIAPH1,DIAPH3,HMOX1,IL1B,NCAM1,NQO1,PDX1,RARB,SOD1,SOD2
MBD3	-0.362	other		0.762	0.0152	AXIN1,CCND1,COX6C,CSNK2A1,CTNNB1,DAAM1,DIXDC1,DVL2,EP300,FBXW4,FOSL1,FZD3,FZD4,FZD5,FZD7,GSK3B,HTRA1,KREMEN1,LGR5,LMO2,MAPK8,NKD1,PAX6,PITX2,POLE4,PPARD,PPP2R2C,PRICKLE1,RHOU,SIRT1,SLC9A3R1,TAL1,TLE5,VANGL2,WNT3A,WNT5A,WNT7B
SATB1	6.713	transcription regulator	Activated	2.099	0.0154	ACTG1,ACTN1,ADCY3,BCL2A1,CCND1,CD8A,CDH1,CEACAM1,CEMIP2,CLEC2B,CSF2,CTNNA1,CTSD,DCP1A,DUSP4,ENOSF1,EPAS1,EPSTI1,ETS1,FAM110A,FERMT2,FOXJ3,GADD45B,GDF15,GLRX,GNG4,GPT2,HELZ2,HSPA8,ID3,IL4R,IL7,IL7R,ILF3,IRF7,IRF8,ITGB1,MAF,MAFA,NFE2L2,NIBAN1,NUP153,POU4F1,PSMD2,PTGS2,RASGRP2,RB1,RELB,RPLP1,RUNX1,SGK1,SIPA1L2,SMAD3,SS18L1,TAF4B,TAOK1,TGFA,TNFRSF8,TRIM22,TSC22D3,TSG101,TUBA4A,UBE2L6,VIM,VPS37B,VTA1,…
PTGS2	-5.485	enzyme	Inhibited	-4.374	0.0155	ADGRL3,ANXA1,ANXA2,AREG,ASXL3,AXIN2,BBC3,BCL2L1,BIRC3,CCND1,CDH1,CDK5,CDKN1B,CTSD,CXCL12,CXCL3,CXCL8,CXCR4,CYP1B1,DLX5,DUSP1,EGR1,ERBB2,ERBB3,ESRRA,EZR,FLT1,FN1,GATA4,HBEGF,ICAM1,IGFBP3,IL11,IL12A,IL1B,IL23A,IL6,ITGA6,ITGAV,KRT23,LPL,LTBP1,MCL1,MKI67,MMP14,MMP2,NBN,NEB,NKD1,NKD2,NOS2,NTN1,PAK1,PCDH7,PITPNM1,PLA2G4A,PPA1,PPARG,PTGER4,PTGS1,PTGS2,PYGB,RAC1,RHOA,RPS19,RUNX2,SEMA7A,SSBP4,TET1,TGM2,TN…
diethylnitrosamine		chemical toxicant		-1.312	0.016	BIRC2,CASP3,CASP8,CCND1,CD63,CDKN1B,CES3,COL3A1,CTNNB1,CXCL12,CYP26A1,DCLK1,E2F1,ELOVL3,EPCAM,ETS2,FAM214A,GSTP1,HIF1A,HMOX1,IGFBP2,IL1A,IL1RAP,IL6,JUN,KRAS,KRT8,LPL,MCL1,NFE2L2,NFKB1,NOS2,NQO1,NR1H3,PHLDA1,PLSCR1,PPARGC1A,PRKCA,SELENBP1,SESN2,SIRT1,SOD1,STAT3,TGFB1,TIMP1,TIMP2,TP53,VEGFA
NPM1	0.899	transcription regulator		-0.376	0.0163	CSF1,CTNNB1,CXCL2,CXCL3,DDB2,E2F1,FOXM1,HOXA10,HOXA5,HOXA7,HOXA9,HOXB5,IL6,IL6ST,NPM1,SOD2,TP53,VEGFA,XPC
GNB2	-0.527	enzyme			0.0163	AHR,ARC,CXCL3,DGAT1,DUSP1,FOSL2,IER3,IL1B,JAG2,MAFB,MBTPS1,MXI1,NR4A1,PLAU,PLK2,PRDM1,PTGER4,THBD,TSC22D3
CTBP1	-0.134	enzyme		1.019	0.0163	BMP7,BRCA2,CDH1,CLDN11,CSF1R,DKK1,ENC1,ENPP2,FAT1,FKBP5,JUP,KRT8,MMD,OCLN,RAC1,SIRT1,SPRY2,VCAN,VDR
KEAP1	-0.46	transcription regulator		-0.45	0.0163	AHR,GBE1,GNAI2,GSTP1,HIF1A,HMOX1,IL18,IL1B,IL6,MAP1LC3A,MST1R,NFE2L2,NQO1,PHKA1,PPARG,PRDX1,S100P,TOP2A,UGT1A1
THBS1	-8.73	other		-1.199	0.0163	ADCYAP1R1,CCN2,COL1A1,COL3A1,COL4A1,EGR1,FN1,IL1B,IL6,LAMA4,LRP1,MMP2,PARP1,PLAU,TGFB1,TGFB2,TIMP1,TNFRSF10A,VEGFA
CUL4B	1.053	other	Inhibited	-2.353	0.0163	AXIN2,CABLES2,CDC6,CDK2,COL4A1,E2F1,EIF3I,GLO1,IGFBP3,KMT2C,NKD2,PRDX3,PTEN,RUNX1,SOD1,TGFB1,TPM3,TSC2,ZFP36
HSF2	0.958	transcription regulator		0.338	0.0163	CCT3,CCT4,CCT7,CCT8,HIF1A,HSBP1,HSPA1A/HSPA1B,HSPA4,HSPB1,HSPH1,IL1B,JUN,PSMB2,PSMC4,PSMD10,PSMD3,STAG2,STAG3,TCP1
RMRP		other		0.853	0.0165	ALPL,CCNB2,COL2A1,KRAS,NKX3-2,PTHLH,RSAD2,RUNX2,SOX9
LPAR1	-3.317	G-protein coupled receptor		-1.644	0.0165	AKT2,CACNA2D1,CCN2,CXCL8,GDNF,IL6,KLF5,PTGS2,SPHK1
IQGAP2	8.689	other		-0.923	0.0165	CCND1,CDH1,CTNNBIP1,FOSL1,IQGAP1,LEF1,NKD1,WNT4,WNT5A
SAT1	-3.799	enzyme		1.078	0.0165	DHFR,EIF3F,GAPDH,IGFBP2,IGFBP3,KLF9,LPL,PPARGC1A,PRKAA2
HOXA4	1.198	transcription regulator		0.588	0.0165	ANKRD1,BIRC5,CCN1,CCN2,CCND1,ITGB1,TAGLN,TAGLN2,TGFB2
TFAP2B	1.318	transcription regulator		0.708	0.0165	EDN1,EPAS1,ERBB2,KIT,MMP2,MT2A,SLC19A1,SOD2,TERT
ID4	3.656	transcription regulator		1.954	0.0165	BBC3,CDH1,CDKN1B,CDKN2B,E2F1,MMP2,PPARG,VEGFA,VIM
DMH1		chemical reagent		1	0.0165	ADAM17,CAV1,IL18,LOX,LOXL2,MMP2,NOS2,PTGS2,VEGFC
N-(3-oxododecanoyl)-homoserine lactone		chemical reagent		-0.109	0.0165	CSF1,CSF2,CXCL2,CXCL8,IL1A,IL1B,IL6,PTGES,PTGS2
selenite		chemical toxicant		0	0.0165	BCL2L1,BIRC5,CAPN10,HLA-E,PLAU,SELENOP,TIMP1,TP73,UVRAG
nickel chloride		chemical toxicant		-1.027	0.0165	DNMT3B,GAPDH,HIF1A,IL1B,IL6,JUN,PLK3,PTGS2,VEGFA
D-tubocurarine		chemical drug			0.0165	CNTN1,DHFR,EGR1,IL6,KMT2C,LITAF,RBBP6,TFPI2,UBE3A
buthionine sulfoximine		chemical drug		-0.943	0.0165	BCL2L1,CD274,CXCR4,EEF2,HBEGF,HMOX1,NFKBIA,NR3C2,PTGS2
onapristone		chemical drug		1.108	0.0165	CTSD,HBEGF,NPY1R,PMP22,RUNX1,SCNN1A,SPHK1,TGFB1,VEGFA
ALKBH5	0.589	enzyme			0.0166	ABI1,ADGRG2,ASAH1,ASB1,AXL,BRCA2,CAV1,CHN1,CLDN11,CTSD,CTTN,EIF4G3,FBXL5,FGFR1,FYN,GMCL1,HSPA8,JAG2,LAMA1,MAPK14,MAST2,MBP,MYO6,NF2,NONO,PAFAH1B1,PRDX4,RACGAP1,RPGR,SBF1,SGMS1,SLC7A8,SOD1,SOX6,STAG2,STON1,TLE3,TMBIM6
CCN2	-6.926	growth factor	Inhibited	-2.573	0.0168	AKT1,BCL2A1,BCL2L1,BCL2L2,BIRC2,BIRC5,CCN2,CCND1,CFLAR,COL1A1,COL2A1,COL4A2,COL8A1,CTNNB1,EGLN3,EGR1,FLNB,FN1,FZD2,HIF1A,HSD17B7,IL6,ITGA1,JUN,LEF1,LIMS1,LOX,LTBP3,MBNL2,MIA3,MMP14,MMP2,PDGFB,PI4K2B,POU5F1,RAB18,SDC4,SOX2,SPARC,TGFB1,TIMP1,TIMP3,TMOD3,TP53,VEGFA,XIAP
EP400	0.331	other		1.904	0.017	CCNF,CDC25A,CDC6,CDCA3,CENPF,E2F1,E2F2,E2F7,FBXO5,FOXM1,INCENP,MAPK12,MCM3,PLK1,PPARG,RBL1,RCC1,SGO1,SKA1,SUV39H2,TP53
miR-145-5p (and other miRNAs w/seed UCCAGUU)		mature microRNA		1.81	0.0171	ABRACL,ACBD3,AHNAK,C11orf58,CBFB,CCDC25,DDR1,DFFA,F11R,FBXO28,IGF1R,IRS1,KLF5,LAMP2,MDFI,MYL9,NDUFA4,PARP8,PLA2G4A,POU5F1,PPP3CA,RASA1,SOD2,SOX2,SPTB,TAGLN,TPM3,USP46,VASN
E2F6	-0.437	transcription regulator		-0.311	0.0171	CBX5,CDC25A,CDC45,CDC6,CDC7,CHEK2,DCTN4,DHFR,E2F1,E2F2,GINS2,GMNN,MCM3,MCM5,METTL2B,PRKAR1A,RAD51AP1,RBBP4,RBBP8,RECQL,RPA2,RRM2,RYR2,SMC1A,SRSF1,STAG3,USP47,ZNF451,ZNF83
histidinol		chemical - endogenous mammalian		0.218	0.0172	ATF4,EGR1,GPT2,SLC7A1,SLC7A5
pervanadate		chemical reagent		-1.172	0.0172	CTNNB1,IRF1,MX1,NFKBIA,PSMB9
F Actin		complex		0.283	0.0172	CCN2,CTSS,CTSV,FLNA,MMP2
ficusin		chemical drug			0.0172	CASP3,CASP8,ITGB1,NOS2,POU5F1
luminespib		chemical drug		-0.447	0.0172	BCL2L1,ERBB2,GRN,HSPA1A/HSPA1B,RAF1
KLF17	-3.577	transcription regulator			0.0172	FN1,RB1,TJP1,TP53,VIM
YOD1	0.251	enzyme	Inhibited	-2.236	0.0172	ANKRD1,CCN1,CCN2,LATS1,WWTR1
CPXM1	3.127	peptidase		0.447	0.0172	COL14A1,COL16A1,COL4A2,COL5A1,COL6A1
WDFY2	-0.314	other		0.447	0.0172	ACO2,AKT2,CYCS,SLC2A1,SLC2A4
RGMB	-0.196	other	Activated	2.172	0.0172	CDH1,CXCL2,CXCL3,IL6,MLKL
LDL-cholesterol		complex		-0.555	0.0172	CXCR4,ICAM1,SHC1,SYP,THBD
TPR	1.021	other		-1.522	0.0172	CXCL8,IL1A,IL1B,IL6,NOTCH1
XPC	1.323	transcription regulator			0.0172	KIN,MBP,POLI,TP53,TP73
CLDN1	-7.24	other		1.4	0.0172	CDH1,CTNNB1,MMP2,VIM,ZEB1
entolimod		biologic drug		1.432	0.0172	CXCL2,CXCL3,HMOX1,IL1B,IL6
miR-3118 (and other miRNAs w/seed GUGACUG)		mature microRNA		0.359	0.0172	CREB1,GNAO1,LIMK1,NR5A2,PUM2
ELP1	0.353	other		1.342	0.0172	BMP4,CTNNB1,FLT1,RHOA,VEGFA
RYK	-0.96	kinase		-0.447	0.0172	COL1A1,DLX1,DLX2,FN1,RUNX2
SRPK1	0.308	kinase		-0.152	0.0172	BCL2L1,INSR,MCL1,RAC1,VEGFA
LHX6	-1.196	transcription regulator		0.651	0.0172	AMBN,GUCY1A1,LEF1,LHX6,PITX2
STX2	0.467	transporter		-0.447	0.0172	BMP2,BMP4,CCND1,MMP2,SMAD7
carboxymethylflavin		chemical - endogenous mammalian		-0.447	0.0172	GLI1,MMP2,PTCH1,SUFU,TIMP1
formylmethylflavin		chemical - endogenous non-mammalian		-0.447	0.0172	GLI1,MMP2,PTCH1,SUFU,TIMP1
PPID	-0.353	enzyme		1.387	0.0172	CDH1,SNAI2,TWIST1,VIM,ZEB1
KX-01		chemical drug		-0.095	0.0172	AKT1,BCAR1,PXN,RPS6,RPS6KB1
DVL2	0.867	other		1.342	0.0172	AXIN2,DVL3,LEF1,PITX2,PLXNA2
NET1	-1.53	other		1.172	0.0172	CDH2,FN1,ITGB1,MMP14,SNAI2
CIMO		chemical reagent		1.342	0.0172	BCL2L1,BID,BIRC5,CCND1,ICAM1
EGTA acetoxymethyl ester		chemical reagent		1.342	0.0172	CXCL8,PTGS2,SERPINB2,TP53,VEGFA
10-(6'-ubiquinonyl)decyltriphenylphosphonium		chemical drug		1.4	0.0172	EGFR,IL18,IL1B,IL6,NFE2L2
6-cyano-7-nitroquinoxaline-2,3-dione		chemical reagent		0.831	0.0172	BDNF,EGR1,GFRA1,JUN,JUNB
GSI34		chemical reagent		0.447	0.0172	BCL2L1,BIRC5,CCND1,NOTCH1,RPS6
10,12-tricosadiynoic acid		chemical reagent		1.342	0.0172	ACADM,CPT1A,ECI1,PPARGC1A,SIRT1
lumichrome		chemical - endogenous non-mammalian		-0.447	0.0172	GLI1,MMP2,PTCH1,SUFU,TIMP1
alpha-hydroxyglutarate		chemical - endogenous mammalian		1.342	0.0172	CDH1,FN1,VIM,ZEB1,ZEB2
UDP-D-glucose		chemical - endogenous mammalian	Activated	2.236	0.0172	CALR,HSP90B1,HSPA5,HYOU1,PDIA3
tacrolimus		chemical drug		-0.247	0.0173	ABCD3,ABLIM1,ADAM19,APP,AREG,ARHGEF1,BASP1,BCL2L1,CAMKK2,CAPG,CASP3,CASP7,CCND1,CD6,COL1A1,COL2A1,COL3A1,CORO2A,CXCL2,CXCL8,CXCR4,DAB2IP,DACH1,DAPK1,DOCK9,DPYSL3,DPYSL5,DUSP4,EDN1,EGR1,ELL2,ENC1,FAM110A,FKBP5,FLNA,FN1,GPRC5B,GRIN2C,HOMER2,HSPD1,ID3,IGFBP4,IKZF2,IL1B,IL1RL1,ITGB8,ITPR1,JUN,JUNB,KCNK3,LBH,LBR,MAF,MARCKSL1,MYH10,MYO1E,NEB,NFATC1,NFATC4,NFKBIA,NOS2,NPTX1,NR3C1,NR4A1,NRP1,NT5E,OCLN,OS…
hexachlorobenzene		chemical toxicant	Inhibited	-4.048	0.0174	AIFM1,ANXA1,ANXA2,CD14,EFEMP2,ELF3,FBLIM1,FGB,FXYD5,GTPBP4,IER3,LGALS3,LXN,MMP2,PSMB10,PSMB8,RCN1,S100A10,S100A11,SPP1,TES,TGIF1,TIMP1,TMSB10/TMSB4X,TNFRSF12A,UPP1,VIM
SERPINF1	0.211	other		0.088	0.0174	AXIN2,BAD,BCL2A1,BCL2L1,BDNF,BID,CCN2,CCND1,CDH5,CXCL8,G0S2,GDNF,LOXL1,LOXL2,NEFH,NFKB1,NFKBIA,NOS2,OCLN,OLIG1,OLIG2,PPARG,PPARGC1A,SOD2,TGFB1,TJP1,VIM
IL32	-6.033	cytokine	Inhibited	-2.846	0.0174	BBC3,BCL2L1,CASP1,CTNNB1,CXCL1,CXCL3,CXCL8,EIF2AK2,FAS,ICAM1,IL1A,IL1B,IL23A,IL32,IL6,MCL1,MMP2,MX1,NFATC1,NOS2,PTGS2,SNAI2,THBD,TP53,ULBP2,VIM,XIAP
mir-23		microRNA		0.252	0.0174	CDH1,CELF2,CKS1B,E2F1,FBXO32,GATM,HMGA1,HOXD10,PRDX3,PTEN,PTK2B,RUNX2,SEMA6A,SOD2,SPP1,SPRY2
baicalein		chemical drug	Activated	2.176	0.0174	ABCB1,AKT1,BCL2L1,BIRC5,CCNB1,CCND1,CCND3,CXCL8,HMOX1,ICAM1,IGF1R,IL6,JUN,MCL1,MMP2,NOS2,PLA2G4A,PRDX6,PTGS2,PTPN6,PTTG1,RB1,RBL1
vincristine		chemical drug		0.56	0.0174	AKT1,AKT2,BCL2L1,BCL2L10,BRCA2,CDKN1B,EGR1,FAS,H2AX,IL1B,JUN,MAPK8,MCL1,NCAM1,PMAIP1,PRKCA,PTGS2,SOD2,TERT,TP53,TP73,YWHAE,YWHAQ
PDGF-DD		complex		0.943	0.0174	BAK1,BIK,CASP3,CASP8,FGF2,GSK3B,PDE1B,PEA15,TNFRSF12A,TP53,TUBB6,UNC5C,VEGFB
SEMA7A	-4.147	transmembrane receptor	Inhibited	-3.053	0.0174	CCN2,CCN5,COL1A1,COL3A1,CTSB,CTSS,EGR1,FGF2,FN1,IL18,IL4R,TGFB1,TIMP1
ALDH2	0.095	enzyme		0.362	0.0174	ATF4,ATF5,CALCB,CTH,GCLM,GSS,PHGDH,PSAT1,SLC1A4,SLC3A2,SLC7A11,SLC7A3,SLC7A5
mir-33	-1.996	microRNA		1.211	0.0174	ABCA1,CDK6,CFD,CPT1A,CROT,FRS2,GCK,IRS2,LPL,PPARG,PPARGC1A,PRKAA1,SLC2A4
SKI	0.255	transcription regulator		-0.686	0.0174	BCL11B,CDC25A,CDH1,CYP26A1,GLI1,MBP,MITF,MUC4,NRCAM,PAX3,PMP22,SMAD7,ZEB2
PD184352		chemical drug		0.99	0.0174	BCL2L1,CCND1,CFLAR,CXCL3,CYP27B1,EGR1,HSPA5,MCL1,NR4A1,NR4A3,OPTN,RARB,TP73
pitavastatin		chemical drug		0.394	0.0174	ABCA1,ACADM,ACOX1,CAT,FDFT1,FDPS,IDI1,LSS,PCSK9,PTGS2,SCARB1,SIRT1,SQLE
ilomastat		chemical drug		0.999	0.0174	CDH1,CXCL3,CXCL8,EGFR,ERBB4,F11R,HBEGF,IL1B,IL6,OCLN,TAC1,TGFB1,TJP1
SRC (family)		group	Inhibited	-3.516	0.0175	BMP2,CDH2,EGR1,ESRRA,FGF2,FLT1,FN1,GRK6,HIF1A,ICAM1,ID1,IL6,ITGAV,MAOA,MCL1,MUC4,NKX2-2,PTGS2,PXN,S100A4,SMAD2,SOX2,STAT1,TJP1,VEGFC
ADIPOQ		other		-0.192	0.0175	ACACB,ACLY,ACOX1,ACSL1,ACSL5,ADIPOR1,ADIPOR2,APPL1,BAD,BCL3,BIRC5,BMP2,CASP6,CCN2,CCND1,CDKN1B,CGB3 (includes others),COL3A1,CXCL1,CXCL11,CXCL2,CXCL3,CXCL8,DGAT1,DUSP1,EGR1,F3,FN1,GCK,GRN,GSK3B,HBEGF,HMOX1,ICAM1,IL4R,IL6,IRS1,LDLR,LEPR,LPL,MLXIPL,MMP2,NCF2,NFKBIA,NOS2,NR1H3,PDCD4,PDHB,PPARA,PPARD,PPARG,PPARGC1A,PRDX3,PRDX5,PRKAA2,PTEN,PTGS2,PTK2B,SHC1,SLC2A4,SOAT1,SOCS3,SOD2,STAT3,SYP,TGFB1,TIMP1…
embelin		chemical - endogenous non-mammalian		1.813	0.0179	BCL2L1,BIRC5,CCND1,CDK2,CDK6,CFLAR,PPARG,XIAP
VGLL3	-2.819	other	Inhibited	-2.828	0.0179	ADM,COL12A1,COL1A1,GADD45B,OSR2,SNAI2,SOX9,SPP1
CIC	-0.573	transcription regulator	Activated	2.795	0.0179	CCND1,DUSP4,ETV4,ETV5,FOSL1,ITGA2,MAFF,SPRY4
miR-451a (and other miRNAs w/seed AACCGUU)		mature microRNA		1.398	0.0179	ABCB1,ADAM10,AKT1,AKTIP,CCND1,CDKN1B,MIF,MMP2
miR-101-3p (and other miRNAs w/seed ACAGUAC)		mature microRNA		0.198	0.0179	BMI1,LIN28B,MCL1,PRKDC,PTGS2,RNF2,RUNX1,SUZ12
PIK3R2	1.496	kinase		-1.942	0.0179	BCL2L1,CASP6,FOXO1,IRF7,ISG15,MKI67,PIK3R1,PLAU
C9		other		-1.937	0.0179	CFLAR,COL1A1,COL3A1,CXCL2,CXCL3,FN1,ICAM1,IL1B
KRIT1		other		-0.707	0.0179	BMP2,CXCR4,DLL4,EFNB2,JUN,RHOA,SOD2,TGFB2
ACO1	-0.072	enzyme		0.031	0.0179	ACO2,APP,FTH1,FTL,GAPDH,IGFBP3,PFN2,TFRC
HNRNPAB	0.272	enzyme		0.633	0.0179	CDH1,HTRA1,PTGS2,S100A4,SPP1,TJP1,TWIST1,VIM
cantharidin		chemical drug		1.561	0.0179	BAG3,BCL2L1,CASP1,IL6,MCL1,NOS2,RXRA,SERPINH1
bisphenol A diglycidyl ether		chemical reagent		-1.499	0.0179	CDH1,EGLN1,EGLN3,ICAM1,PTEN,RARB,TGFBR2,VDR
quinacrine		chemical drug		1.953	0.0179	BCL2L1,BIRC2,BIRC5,CFLAR,MCL1,PRNP,TP53,XIAP
BTNL2		transmembrane receptor		-0.686	0.018	ACTR3B,CD109,CERK,CHD7,CNN3,CSF2,CYP2S1,DAPP1,EMB,ENAH,EPCAM,GBP3,GBP4,GPD2,IFITM3,IFNGR1,IKZF2,IL1RL1,IL6,ITIH5,LDLRAD4,MBNL3,MXD1,MYO10,N4BP1,NCOA7,NT5E,RRAGD,S100A4,SPECC1,ST14,TMEM64,XDH,YPEL2
KITLG	-0.097	growth factor	Inhibited	-4.447	0.0183	ACTB,ALOX5AP,AXL,B2M,BCL2L1,BIK,BIRC5,BMP1,CALCB,CASP1,CASP3,CCN2,CCND3,CD14,CDC42EP5,CDKN1B,CDKN2B,CIAPIN1,CLIC1,CSF1,CSF2,CXCL12,CXCL2,CXCL3,CXCL8,CXCR4,EFNB2,EGR1,EPHB4,FABP5,FGFR1,FRK,FTH1,GAS6,GCC2,GNAZ,HMOX1,IGF1R,IGFBP3,IL11,IL18,IL1A,IL1B,IL1RL1,IL6,IRF2,ITGAV,KIT,LAPTM5,LDLR,MAP2K1,MEF2C,MID1IP1,MME,MMP2,NFKBIA,NPM1,NR3C1,ORAI1,OSBPL1A,PARVB,PAX6,PDCD4,PDGFB,PIM1,PKM,PLCL2,PLSCR1,PRKCA,P…
H89		chemical - kinase inhibitor	Activated	2.337	0.0185	ABCA1,ALPL,AMH,ANXA1,APP,AREG,BAK1,BCL2L1,BDNF,CAMKK2,CCNA1,CCND1,CD14,CEBPB,CLCF1,COL2A1,CREB1,CREBBP,CXCL8,CYP27B1,DUSP1,EGFR,EGR1,FGF2,GABPA,GDNF,GSTP1,HDAC1,HMOX1,IGFBP5,IL11,IL1B,IL23A,IL6,ITPR3,MITF,MKI67,MMP2,NFKBIA,NOS2,NR4A1,NTS,PDE3B,PDX1,PLA2G4A,PLAGL1,PLAU,PPARD,PPARGC1A,PPP1R16B,PTGS2,RUNX1,SAA1,SDC1,SHC1,SIGMAR1,SMAD3,SOD2,TERT,TFPI2,TGFA,UCP2,VEGFA
TBK1	-0.522	kinase	Inhibited	-3.087	0.0186	APOBEC3B,BCL2L1,CMPK2,CXCL11,CXCL2,CXCL3,CXCL8,EDN1,ICAM1,IFI44,IFIT1,IFIT2,IFIT3,IFRD2,IL12A,IL15,IL15RA,IL18,IL1A,IL6,IRF3,IRF7,ISG15,ISG20,NFKB1,NFKBIZ,NMI,OAS1,OAS2,OAS3,OASL,PTGS2,RBL1,RGCC,RSAD2,SH3BP5,SLCO3A1,TLR2,TLR3,TSC22D1,VEGFA,ZC3H12A
BMP4	1.918	growth factor		-0.819	0.0186	ACVR2B,ADGRG1,ALDH1A2,BMP2,BMP4,CCN1,CCND1,CCNG1,CDH1,CDH5,CDK2,CDX2,CEBPB,COBLL1,COCH,COL2A1,DLX2,DLX3,DLX4,DLX5,EFNA1,EGFR,EIF4A2,ELF3,FOXF1,GATA2,HEY1,HTRA1,ID1,ID3,IL6,ITGA4,JUN,JUNB,KIT,KLF10,KRT23,LAMA1,LEF1,MAFK,MITF,MIXL1,MMP14,MSX1,MSX2,MXD1,NCAM1,NGFR,NOS2,OVOL1,OVOL2,PAX2,PITX2,POU5F1,PPARD,PPARG,PRKCH,PRR5,PTCH1,PYCR2,RUNX2,S100P,SALL3,SCARB1,SIRT1,SLC13A4,SLC38A3,SLC40A1,SMAD7,SMAD9,…
SKP2	0.53	other		1.209	0.0188	BBC3,CCND1,CDH1,CDH2,CDK2,CDKN1B,E2F1,NFATC4,PHB2,POU5F1,RHOA,S100A4,SLC2A1,TP73,TWIST1,VIM,ZEB1,ZEB2
NGLY1	1.014	enzyme		-0.2	0.0188	ATG13,ATG5,ATG9B,GABPB1,IFI27,IFI44,IFI44L,IFIT1,IFIT2,IFIT3,KEAP1,NFE2L2,OAS1,OAS3,PIK3C3,RSAD2,SQSTM1,TAX1BP1
DIO3	6.08	enzyme		1.602	0.0188	ABCC8,AMH,COL6A1,FLYWCH2,FST,FXYD6,GCK,GPC3,HR,IER5,ITGA7,KCNJ11,MAMDC2,PAQR6,PDX1,PYGL,SEMA7A,SYCE2
Irp		group		0.742	0.0188	ACO2,APP,EPAS1,FTH1,FTL,SLC40A1,TFRC
O6-benzylguanine		chemical drug		1.4	0.0188	CCNB1,CCNB2,CFLAR,FAS,H2AX,MKI67,MSH2
TEAD		group	Inhibited	-2.4	0.0188	CALD1,CAV2,CCN1,CCN2,CCND1,FN1,FOXM1
belinostat		chemical drug		0.162	0.0188	BCL2L1,CDKN1B,ERCC1,MCL1,MICA,MICB,XIAP
palbociclib		chemical drug		0.2	0.0188	CDC6,CDK6,CDT1,E2F1,MDM4,MKI67,ZEB1
HOXA11-AS	5.358	other		1.095	0.0188	CDH1,CDH2,CTNNB1,SNAI2,STAT3,ZEB1,ZEB2
LINC01139	4.813	other	Inhibited	-2.646	0.0188	ANGPTL4,ANKRD37,BHLHE40,EGR1,IGFBP3,MAPK1,PKM
FAT1	-2.862	other		-1.851	0.0188	IL1B,IL6,JUN,PDCD4,PLAU,PTGS2,VEGFC
ZGPAT	-0.389	transcription regulator		1.195	0.0188	CDC25A,EGFR,FGF5,PDGFB,PTEN,RGS3,VEGFB
DPY30	-0.37	other			0.0188	CCNE2,CDK2,CDKN2B,E2F1,E2F2,ID1,ID3
cercosporin		chemical - endogenous non-mammalian		0.148	0.0188	AXIN2,BIRC5,CCN2,CCND1,CDC25A,DKK1,FN1
[truncated: 1,198 more rows]
