# Supplementary material for: Single-cell transcriptome analysis defines heterogeneity of the murine pancreatic ductal tree
Source: eLife. 2021 May 19;10:e67776. doi: 10.7554/eLife.67776 (PMC8184217; doi:10.7554/eLife.67776)
Supplement: Figure 6—source data 4. [file elife-67776-fig6-data4.xlsx]

## Sheet: norm_reads (1)
Gene	hSpp1_g5	hSpp1_g6	hSpp1_g7	hSpp1_g8	scrgRNA	scrgRNA_2	scrgRNA_3
WASH7P	88.3327	128.091	134.398	105.901	79.4711	74.35	76.8472
MIR6859-1	0.939709	0	3.0089	0.980569	1.05962	0.991333	1.08235
LOC100996442	0	0	1.00297	0	4.23846	9.91333	3.24706
WASH9P	164.449	227.615	230.682	172.58	110.2	121.934	108.235
LOC101928626	17.8545	17.5089	27.0801	15.6891	29.6692	14.87	16.2353
FAM87B	3.75884	0	0	0	1.05962	0	1.08235
LINC01128	402.196	363.079	373.104	364.772	350.733	386.62	387.483
LINC00115	34.7692	33.1747	28.0831	30.3976	16.9538	13.8787	19.4824
FAM41C	4.69855	0	0	0	0	0	0
LINC02593	489.588	505.914	648.919	449.101	82.65	47.584	33.553
SAMD11	695.385	804.486	1217.6	901.143	258.546	183.397	129.883
NOC2L	5241.7	5146.69	6351.79	6004.02	3584.68	3853.31	4243.91
KLHL17	762.104	815.545	897.655	823.678	487.423	466.918	431.86
PLEKHN1	13.1559	23.038	13.0386	10.7863	823.321	789.101	809.601
PERM1	11.2765	1.84304	0	0.980569	18.0135	19.8267	25.9765
HES4	1477.22	1373.99	1503.45	1546.36	691.929	674.107	532.519
ISG15	96.79	121.641	87.2581	118.649	2649.04	2663.71	2097.6
AGRN	1768.53	1738.91	1916.67	1548.32	12790.6	12744.6	12612.7
LOC100288175	49.8046	41.4684	30.089	20.592	189.671	174.475	166.683
RNF223	0	0	1.00297	0.980569	351.792	302.357	266.259
C1orf159	382.462	375.058	388.148	372.616	422.786	414.377	464.33
MIR200B	0	0	0	0	2.11923	0	2.16471
MIR200A	0	0	0	0	1.05962	4.95667	3.24706
MIR429	0	0	0	0	14.8346	6.93933	6.49413
TTLL10	0	0	0	0	7.41731	3.96533	6.49413
TNFRSF18	1.87942	0	0	0	14.8346	3.96533	2.16471
TNFRSF4	4.69855	0.921519	0	0	1.05962	0	0
SDF4	1862.5	1944.41	2030	1951.33	3211.69	3348.72	3450.55
B3GALT6	627.726	732.608	625.851	740.33	807.427	818.841	1044.47
C1QTNF12	8.45738	17.5089	21.0623	10.7863	24.3711	12.8873	4.32942
UBE2J2	1286.46	1322.38	1297.84	1276.7	1263.06	1352.18	1394.07
SCNN1D	223.651	225.772	169.501	156.891	29.6692	23.792	22.7295
ACAP3	1166.18	1399.79	1383.09	1110.98	1150.74	1062.71	1000.1
PUSL1	606.112	598.988	704.083	716.796	580.669	568.034	648.331
INTS11	1482.86	1505.76	1639.85	1628.73	1408.23	1429.5	1639.77
CPTP	346.753	325.296	334.991	411.839	774.579	795.049	845.319
TAS1R3	5.63826	5.52912	4.01187	8.82512	13.775	15.8613	12.9883
DVL1	2194.22	2222.7	2251.66	2294.53	1874.46	2110.55	2596.57
MXRA8	58.262	79.2507	47.1394	59.8147	9.53654	10.9047	20.5647
AURKAIP1	1689.6	1594.23	2016.97	1997.42	2050.36	1983.66	2200.43
CCNL2	2860.47	3406.86	3561.53	2997.6	3136.46	2974.99	2827.11
MRPL20-AS1	608.932	613.732	602.783	627.564	333.779	297.4	321.459
MRPL20	1361.64	1334.36	1517.49	1650.3	1303.33	1254.04	1491.48
ANKRD65	0	6.45064	12.0356	0.980569	638.948	577.947	478.401
VWA1	165.389	220.243	152.451	279.462	1769.56	1645.61	1238.21
ATAD3C	12.2162	13.8228	4.01187	5.88341	50.8615	47.584	35.7177
ATAD3B	2209.26	2231	2851.43	2253.35	1550.22	1738.8	1909.27
ATAD3A	2118.1	2003.38	2462.28	2304.34	1356.31	1523.68	1539.11
TMEM240	20.6736	7.37215	12.0356	7.84455	21.1923	9.91333	15.153
SSU72	1976.21	1984.03	2158.38	2141.56	1806.64	1885.52	2114.92
FNDC10	372.125	338.198	237.703	321.627	421.727	394.551	336.612
MIB2	942.528	960.223	983.91	648.156	778.817	640.401	598.542
MMP23B	6.57796	6.45064	15.0445	8.82512	1.05962	2.974	5.41177
CDK11B	1163.36	1103.98	1129.34	1076.66	1081.87	1026.03	1071.53
SLC35E2B	1682.08	1657.81	1532.53	1509.1	1681.61	1508.81	1367.01
MMP23A	0	1.84304	0	0.980569	0	0.991333	0
CDK11A	9.39709	34.0962	13.0386	12.7474	18.0135	7.93067	19.4824
SLC35E2A	311.983	307.787	303.899	216.706	199.208	146.717	137.459
NADK	1447.15	1445.86	1451.29	1476.74	1732.47	1850.82	1798.87
GNB1	5900.43	5741.07	5949.6	6128.56	10022.9	10496.2	11255.4
LOC105378949	22.553	13.8228	9.0267	7.84455	6.35769	6.93933	3.24706
CALML6	10.3368	6.45064	4.01187	2.94171	5.29808	2.974	2.16471
TMEM52	74.237	65.4279	72.2136	116.688	12.7154	11.896	4.32942
CFAP74	3.75884	6.45064	2.00593	6.86398	3.17885	0	4.32942
GABRD	23.4927	21.1949	7.02077	20.592	0	0.991333	1.08235
LOC105378591	0.939709	0	0	0.980569	0	0	0
PRKCZ	495.227	492.091	546.617	499.11	535.106	483.771	466.495
PRKCZ-AS1	11.2765	9.21519	10.0297	11.7668	19.0731	19.8267	9.74119
FAAP20	785.597	752.881	751.222	679.534	660.14	675.098	660.236
SKI	2252.48	2421.75	2295.79	2119.01	1874.46	1879.57	1957.98
MORN1	282.852	310.552	293.869	241.22	111.26	121.934	134.212
LOC100129534	64.8399	48.8405	39.1157	50.9896	30.7288	22.8007	18.4
RER1	1827.73	1907.55	1752.18	1630.69	2369.3	2577.47	2801.13
PEX10	541.272	520.658	570.688	536.371	526.629	431.23	480.566
PLCH2	5.63826	1.84304	29.086	1.96114	1172.99	1032.97	1022.83
PANK4	632.424	634.005	634.878	548.138	595.504	635.445	616.942
HES5	54.5031	35.9393	15.0445	24.5142	15.8942	24.7833	11.9059
TNFRSF14-AS1	0.939709	0.921519	0	0	9.53654	17.844	7.57648
TNFRSF14	13.1559	8.29367	9.0267	1.96114	308.348	238.911	237.036
LOC100996583	1.87942	0	0	0	0	0	0
PRXL2B	416.291	415.605	397.175	447.14	361.329	316.235	303.059
MMEL1	16.9148	11.9798	7.02077	7.84455	16.9538	6.93933	6.49413
TTC34	21.6133	13.8228	13.0386	12.7474	12.7154	15.8613	8.65884
LINC00982	93.0312	70.0355	47.1394	33.3393	0	0	0
PRDM16	342.994	315.16	227.673	277.501	1.05962	0.991333	0
ARHGEF16	152.233	108.739	73.2166	86.2901	1493	1471.14	1263.11
MEGF6	248.083	246.967	143.424	118.649	839.215	489.719	365.836
TPRG1L	487.709	455.231	415.228	403.994	941.998	891.209	907.013
WRAP73	927.493	952.851	978.895	918.793	635.769	593.809	582.307
TP73	175.726	126.248	148.439	148.066	323.183	276.582	263.012
TP73-AS1	944.408	949.165	972.878	860.94	802.129	862.46	828.001
CCDC27	3.75884	11.9798	8.02373	10.7863	2.11923	10.9047	4.32942
SMIM1	18.7942	21.1949	3.0089	14.7085	6.35769	4.95667	8.65884
LRRC47	1557.1	1474.43	1735.13	1689.52	1424.12	1464.2	1516.38
CEP104	1169.94	1092.92	1187.51	1102.16	991.8	1066.67	1066.12
DFFB	581.68	551.99	663.964	656.001	242.652	208.18	205.647
C1orf174	481.131	476.425	553.638	526.566	522.39	551.181	555.248
LINC01134	29.131	25.8025	14.0415	13.728	27.55	35.688	40.0471
LINC01346	1.87942	0	0	0	0	0	0
LOC105376673	0	0	0	1.96114	0	0	0
NPHP4	458.578	478.269	393.163	320.646	372.985	365.802	310.636
KCNAB2	163.509	176.932	159.472	178.464	55.1	89.22	106.071
CHD5	53.5634	55.2912	27.0801	17.6502	6.35769	2.974	1.08235
RPL22	1589.05	1548.15	1654.89	1612.06	1619.09	1586.13	1651.67
LOC102724450	2.81913	6.45064	2.00593	1.96114	5.29808	5.948	5.41177
RNF207	201.098	210.106	182.54	170.619	584.908	478.814	369.083
ICMT	3605.66	3600.38	3661.83	3703.61	4502.3	4889.26	5102.22
LINC00337	74.237	56.2127	58.1721	47.0673	60.3981	82.2807	83.3413
HES3	0.939709	2.76456	0	0	0	0	0
GPR153	294.129	250.653	166.492	198.075	325.302	300.374	303.059
ACOT7	1198.13	1246.82	1370.05	1372.8	1293.79	1336.32	1417.88
HES2	13.1559	23.9595	26.0771	16.6697	1124.25	1131.11	771.719
ESPN	8.45738	3.68608	1.00297	1.96114	133.512	99.1333	60.6119
TNFRSF25	92.0915	95.838	80.2373	58.8341	427.025	468.901	479.483
PLEKHG5	231.168	243.281	175.519	208.861	1149.68	1102.36	1305.32
NOL9	1438.69	1260.64	1715.07	1391.43	880.54	983.403	1053.13
TAS1R1	2.81913	4.6076	1.00297	0.980569	0	0	0
ZBTB48	488.649	473.661	464.374	401.053	448.217	388.603	378.824
KLHL21	1457.49	1513.13	1549.58	1261.01	1399.75	1588.12	1712.29
PHF13	929.372	1059.75	881.608	915.852	635.769	673.115	671.06
THAP3	377.763	355.706	393.163	388.305	335.898	360.845	313.883
DNAJC11	1977.15	2066.97	2229.59	2149.41	1924.26	1980.68	2148.47
LINC01672	0.939709	0	0	0.980569	0	0	0
CAMTA1	788.416	841.347	739.186	806.028	456.694	474.849	557.413
VAMP3	1890.69	1881.74	1890.59	1958.2	2128.77	2276.1	2301.09
PER3	57.3223	57.1342	55.1632	52.9507	381.461	426.273	359.342
UTS2	1.87942	2.76456	0	1.96114	1.05962	0	0
TNFRSF9	42.2869	38.7038	3.0089	19.6114	40.2654	39.6533	31.3883
PARK7	3394.23	3587.47	3997.82	3965.42	3551.83	3795.82	3683.25
ERRFI1	833.522	813.702	625.851	755.038	2205.06	2183.91	1944.99
LINC01714	0	0	0	0	3.17885	0	0
SLC45A1	0.939709	2.76456	0	0	1.05962	1.98267	2.16471
RERE	1517.63	1558.29	1257.72	1145.3	1740.95	1524.67	1410.31
RERE-AS1	0	0	0	2.94171	5.29808	3.96533	3.24706
ENO1	28920.5	29080.4	37247.2	37028.2	28679.5	30353.6	34515.2
MIR6728	2.81913	0	0	0	0	0	0
ENO1-AS1	4.69855	11.0582	4.01187	4.90285	6.35769	8.922	5.41177
SLC2A5	3.75884	0.921519	0	0.980569	0	0.991333	1.08235
GPR157	350.512	281.985	271.804	326.53	374.044	371.75	408.048
MIR34AHG	40.4075	58.9772	48.1424	23.5337	18.0135	12.8873	11.9059
LNCTAM34A	7.51767	15.6658	2.00593	1.96114	3.17885	5.948	5.41177
H6PD	474.553	473.661	427.264	476.557	352.852	365.802	331.201
SPSB1	108.067	99.5241	95.2818	126.493	500.138	473.857	555.248
LINC02606	9.39709	20.2734	9.0267	8.82512	2.11923	4.95667	1.08235
SLC25A33	817.547	695.747	717.121	838.387	398.415	446.1	506.542
TMEM201	1028.98	1079.1	1129.34	1021.75	907.031	873.365	948.143
PIK3CD	290.37	236.83	144.427	207.881	352.852	407.438	580.142
PIK3CD-AS2	143.776	122.562	108.32	80.4067	1.05962	3.96533	1.08235
CLSTN1	3250.45	3133.17	3124.24	2813.25	6112.92	6351.47	6579.64
CTNNBIP1	440.724	409.155	379.121	450.081	1243.99	1163.83	1131.06
LZIC	1001.73	1010.91	1093.23	1072.74	1310.74	1283.78	1275.01
NMNAT1	223.651	199.97	184.546	161.794	348.613	255.764	257.6
MIR5697	0	0	0	0	0	1.98267	0
RBP7	6.57796	10.1367	2.00593	9.80569	126.094	153.657	143.953
UBE4B	1810.82	1890.96	1998.91	1764.04	1704.92	1587.12	1687.39
KIF1B	2482.71	2415.3	1911.65	2180.79	2435	2216.62	2143.06
PGD	3881.94	3865.77	4226.5	3719.3	3019.9	3063.22	3071.72
CENPS-CORT	1.87942	0.921519	0	0	1.05962	0.991333	0
CENPS	15.0353	20.2734	13.0386	23.5337	27.55	20.818	20.5647
CORT	4.69855	3.68608	2.00593	0	1.05962	1.98267	2.16471
DFFA	4230.57	4136.7	4047.97	4244.88	1800.29	1797.29	1822.69
PEX14	655.917	579.636	625.851	630.506	666.498	645.358	566.072
CASZ1	357.089	364.922	241.715	237.298	480.006	469.892	293.318
C1orf127	2.81913	2.76456	0	0.980569	0	0	0
TARDBP	1994.06	2201.51	2396.09	2221.97	1731.41	1738.8	1923.34
MASP2	12.2162	12.9013	9.0267	11.7668	1.05962	2.974	0
SRM	2941.29	3223.47	4034.93	4012.49	2323.74	2592.34	2675.58
EXOSC10	2329.54	2272.47	2294.79	2321.01	1925.32	1911.29	2007.77
EXOSC10-AS1	44.1663	46.076	52.1543	41.1839	34.9673	36.6793	28.1412
MTOR	3202.53	3077.87	2979.81	2800.51	2773.01	2845.13	2871.49
MTOR-AS1	9.39709	7.37215	18.0534	7.84455	10.5962	9.91333	7.57648
UBIAD1	728.275	703.119	724.142	838.387	602.921	662.211	727.342
DISP3	18.7942	13.8228	11.0326	8.82512	5.29808	1.98267	2.16471
LINC01647	15.0353	11.0582	0	0.980569	1.05962	0.991333	3.24706
FBXO2	46.9855	54.3696	21.0623	9.80569	1608.5	1592.08	1659.25
FBXO44	482.071	472.739	402.19	369.675	537.225	451.057	468.66
FBXO6	1.87942	1.84304	3.0089	0	168.479	185.379	159.106
MAD2L2	1106.04	961.145	914.705	1086.47	605.04	568.034	613.695
DRAXIN	3.75884	0	1.00297	1.96114	1.05962	0.991333	0
AGTRAP	621.148	611.889	794.349	684.437	763.982	893.191	1002.26
C1orf167	36.6487	31.3317	11.0326	18.6308	8.47692	9.91333	12.9883
MTHFR	658.736	707.727	543.608	533.43	642.127	649.323	552.001
CLCN6	435.085	477.347	494.462	375.558	420.667	434.204	353.93
NPPA	1.87942	0.921519	2.00593	0.980569	0	0	1.08235
NPPB	0.939709	1.84304	0	0.980569	6.35769	5.948	1.08235
KIAA2013	1162.42	1160.19	1174.47	1137.46	1401.87	1434.46	1509.89
PLOD1	1409.56	1434.81	1607.76	1405.16	1786.51	1925.17	1783.72
MFN2	3558.68	3227.16	3174.39	3168.22	5087.21	4860.51	4932.29
MIIP	529.996	548.304	549.626	539.313	439.74	378.689	400.471
TNFRSF8	29.131	5.52912	2.00593	23.5337	613.517	595.791	748.99
TNFRSF1B	4.69855	7.37215	9.0267	1.96114	23.3115	10.9047	36.8001
VPS13D	1117.31	1059.75	997.952	977.627	1251.41	1116.24	966.543
SNORA59A	3.75884	2.76456	3.0089	0.980569	4.23846	1.98267	2.16471
DHRS3	182.304	143.757	107.317	209.842	1677.37	1161.84	809.601
HNRNPCL1	0	0	0	0	1.05962	0	1.08235
HNRNPCL3	0.939709	0.921519	0	0	0	0	0
PRAMEF15	2.81913	1.84304	0	0	0	0	0
PRAMEF14	0	1.84304	0	0	0	0	0
PDPN	590.137	514.208	557.649	553.041	579.609	539.285	528.189
PRDM2	961.323	994.319	819.424	810.931	1511.01	1468.16	1429.79
KAZN	466.096	429.428	370.095	418.703	259.606	215.119	186.165
TMEM51-AS1	15.9751	19.3519	9.0267	12.7474	382.521	321.192	132.047
TMEM51	170.087	166.795	145.43	181.405	1342.53	1243.13	897.272
FHAD1	238.686	88.4659	33.0979	100.018	20.1327	15.8613	12.9883
LOC101927417	2.81913	0.921519	2.00593	1.96114	0	0.991333	0
EFHD2	1296.8	1311.32	1323.92	1439.48	1793.93	2086.76	2190.69
CTRC	3.75884	1.84304	4.01187	0.980569	0	0	0
CASP9	298.828	310.552	336.997	302.015	287.156	301.365	246.777
DNAJC16	389.04	434.036	418.237	375.558	582.788	568.034	543.342
AGMAT	59.2017	66.3494	54.1602	37.2616	365.567	406.447	467.577
DDI2	2368.07	2375.68	2634.79	2307.28	1672.07	1554.41	1433.04
PLEKHM2	1371.04	1228.39	969.869	1159.03	1744.13	1776.47	1920.1
SLC25A34	21.6133	19.3519	14.0415	11.7668	18.0135	19.8267	9.74119
SLC25A34-AS1	0.939709	0	0	0	0	0.991333	0
FBLIM1	356.15	284.749	232.688	240.239	2319.5	2279.08	2695.06
UQCRHL	73.2973	59.8988	78.2314	60.7953	42.3846	34.6967	37.8824
FLJ37453	179.484	215.636	179.531	189.25	87.9481	96.1593	95.2472
SPEN	8383.15	8075.27	8065.86	7308.18	2799.5	3039.43	2630.12
ZBTB17	363.667	369.529	325.964	308.879	457.754	471.875	505.46
HSPB7	0	0.921519	1.00297	0	0	0	0
CLCNKA	1.87942	3.68608	1.00297	3.92228	0	0	1.08235
CLCNKB	30.0707	17.5089	9.0267	11.7668	0	0	0
FAM131C	47.9252	40.5469	19.0564	37.2616	26.4904	22.8007	20.5647
EPHA2	587.318	515.129	455.347	428.509	6317.43	7174.28	8486.74
ARHGEF19	54.5031	58.0557	48.1424	42.1645	894.315	834.703	641.836
CPLANE2	47.9252	66.3494	75.2225	65.6981	128.213	116.977	83.3413
FBXO42	805.331	713.256	689.038	646.195	692.988	662.211	652.66
SZRD1	4210.84	4305.34	4030.92	4506.7	4552.11	4941.8	5271.07
SPATA21	58.262	51.6051	63.1869	68.6398	58.2788	79.3067	74.6825
NECAP2	893.663	875.443	769.275	808.969	1115.77	1264.94	1286.92
LINC01772	14.0956	8.29367	5.01483	2.94171	4.23846	9.91333	9.74119
CROCCP3	90.2121	92.1519	71.2106	78.4455	42.3846	44.61	58.4472
LINC01783	47.9252	23.038	24.0712	22.5531	1.05962	0	0
NBPF1	684.108	643.22	575.703	585.4	636.829	653.289	675.389
CROCCP2	1156.78	1123.33	1037.07	824.659	593.384	566.051	523.86
MST1P2	31.0104	35.9393	35.1038	24.5142	33.9077	22.8007	27.0589
ESPNP	0.939709	1.84304	0	0.980569	4.23846	1.98267	1.08235
CROCC	323.26	354.785	324.961	305.938	298.811	267.66	279.248
MST1L	8.45738	10.1367	7.02077	2.94171	9.53654	4.95667	4.32942
LOC105376805	0	0	5.01483	2.94171	33.9077	36.6793	43.2942
MFAP2	54.5031	86.6228	15.0445	26.4754	300.931	335.071	318.212
ATP13A2	1547.7	1459.69	1478.37	1506.15	1108.36	1113.27	1317.23
SDHB	1869.08	1657.81	1931.71	1893.48	1559.75	1606.95	1748
PADI2	67.6591	62.6633	23.0682	47.0673	37.0865	12.8873	33.553
LOC400743	0.939709	0	0	0	3.17885	2.974	2.16471
PADI1	0.939709	0	3.0089	0.980569	23.3115	23.792	17.3177
PADI3	65.7796	21.1949	6.0178	11.7668	10.5962	6.93933	7.57648
RCC2	7182.2	7527.89	9578.33	8185.79	7812.54	7529.18	7673.9
ARHGEF10L	122.162	115.19	80.2373	96.0958	486.363	450.065	317.13
ACTL8	14.0956	9.21519	4.01187	6.86398	0	0	0
IGSF21	30.0707	35.0177	0	6.86398	0	0	0
KLHDC7A	0	0.921519	0	0	34.9673	21.8093	20.5647
PAX7	33.8295	15.6658	0	5.88341	0	0	0
ALDH4A1	374.004	411.919	349.032	312.802	896.434	756.387	658.072
MIR1290	0	0	2.00593	0	0	0	0
IFFO2	436.965	473.661	575.703	485.382	5069.2	4936.84	4422.5
UBR4	4127.2	4045.47	3378.99	3153.51	4534.09	4435.23	3849.94
EMC1-AS1	31.0104	35.9393	20.0593	10.7863	18.0135	16.8527	20.5647
EMC1	1855.93	1796.04	1748.17	1689.52	2391.55	2610.18	2692.9
MRTO4	2136.9	2081.71	2665.89	2614.2	1893.53	2254.29	2584.66
AKR7L	26.3119	22.1165	35.1038	21.5725	5.29808	3.96533	9.74119
AKR7A3	14.0956	18.4304	17.0504	9.80569	13.775	10.9047	10.8235
AKR7A2	1042.14	997.084	933.762	1015.87	889.017	871.382	904.849
PQLC2	335.476	347.413	373.104	353.985	564.775	681.046	707.86
CAPZB	2485.53	2320.39	2759.16	2472.01	4393.16	4681.08	4648.71
MINOS1	53.5634	67.2709	54.1602	57.8536	44.5038	60.4713	58.4472
NBL1	291.31	272.77	192.57	281.423	1207.96	1333.34	1306.4
HTR6	58.262	42.3899	16.0475	39.2228	0	0	3.24706
TMCO4	56.3826	76.4861	87.2581	76.4844	427.025	417.351	401.554
OTUD3	1027.1	968.517	1032.05	872.706	450.336	432.221	479.483
PLA2G2D	1.87942	0.921519	0	0	0	0	0
VWA5B1	0	0.921519	0	1.96114	0	0	0
CAMK2N1	280.973	270.005	171.507	227.492	1348.89	1538.55	1702.54
MUL1	633.364	580.557	592.753	631.486	714.181	801.989	924.331
FAM43B	81.7547	88.4659	8.02373	53.9313	0	2.974	4.32942
CDA	34.7692	21.1949	18.0534	9.80569	491.661	482.779	523.86
PINK1	1125.77	1059.75	1107.28	1062.94	1384.92	1298.65	1350.78
PINK1-AS	165.389	185.225	230.682	192.192	175.896	197.275	190.494
DDOST	4143.18	4139.46	4375.94	4616.52	4497.01	4689.01	4866.27
KIF17	140.017	129.934	117.347	135.319	13.775	18.8353	24.8942
SH2D5	224.59	213.792	221.656	228.473	257.486	415.369	765.225
HP1BP3	3387.65	3421.6	3313.8	3138.8	5178.34	5013.17	4871.68
EIF4G3	3820.86	3773.62	3364.95	3099.58	2474.2	2384.16	2136.57
ECE1	1137.05	1036.71	905.679	1009.01	2446.65	2498.16	2172.29
LOC100506801	1.87942	1.84304	3.0089	2.94171	0	0	2.16471
NBPF3	513.081	488.405	543.608	480.479	313.646	295.417	338.777
ALPL	95.8503	74.6431	35.1038	56.873	13.775	8.922	8.65884
RAP1GAP	184.183	123.484	85.2522	112.765	128.213	135.813	136.377
USP48	1802.36	1893.72	2068.12	1870.93	1762.14	1771.51	1626.78
LDLRAD2	1.87942	11.0582	9.0267	7.84455	77.3519	63.4453	44.3765
HSPG2	358.969	387.96	395.169	290.248	4619.92	3568.8	2598.73
LINC01635	1.87942	2.76456	1.00297	0.980569	2.11923	1.98267	2.16471
LINC00339	68.5988	89.3874	100.297	70.601	52.9808	27.7573	38.9648
CDC42	5949.3	5589.01	5816.2	6212.89	6803.79	7076.14	7807.03
WNT4	1.87942	3.68608	3.0089	1.96114	85.8288	50.558	16.2353
LOC105376845	2.81913	11.9798	7.02077	0	16.9538	15.8613	22.7295
ZBTB40	1077.85	1034.87	1060.14	937.424	714.181	683.029	616.942
EPHA8	88.3327	56.2127	26.0771	58.8341	0	0	0
EPHB2	595.776	446.937	417.234	480.479	3009.31	3060.25	3474.36
MIR4253	0	2.76456	2.00593	3.92228	16.9538	11.896	16.2353
TEX46	6.57796	2.76456	5.01483	4.90285	1.05962	0	0
KDM1A	4059.54	3877.75	4111.16	3998.76	2294.07	2216.62	2296.76
LUZP1	1029.92	1058.83	1067.16	968.802	2439.23	2591.35	2640.95
HTR1D	15.0353	8.29367	17.0504	14.7085	79.4711	67.4107	54.1177
LINC01355	140.017	92.1519	165.489	110.804	61.4577	45.6013	69.2707
HNRNPR	8180.17	8103.84	8850.18	9064.38	4933.57	5128.17	5594.69
ZNF436	273.455	364.922	237.703	256.909	676.034	661.219	555.248
ZNF436-AS1	62.0208	64.5064	70.2077	75.5038	32.8481	53.532	29.2236
TCEA3	14.0956	9.21519	3.0089	2.94171	21.1923	11.896	28.1412
ASAP3	210.495	223.929	157.466	207.881	105.962	91.2027	62.7766
E2F2	873.93	878.208	646.913	749.155	321.063	318.218	265.177
ID3	801.572	791.585	1017.01	867.804	7067.63	5796.33	4548.06
MDS2	0	0	0	0.980569	3.17885	0	0
RPL11	14104.1	15712.8	16227	15901.9	11313.5	11656.1	12570.5
ELOA-AS1	113.705	81.0937	92.2729	99.0375	59.3384	34.6967	47.6236
ELOA	2343.63	2183.08	2205.52	2074.88	2929.84	3128.65	3492.76
PITHD1	1480.04	1436.65	1523.51	1499.29	941.998	1037.93	1096.43
LYPLA2	1095.7	965.752	1220.61	1154.13	1671.01	1646.6	1782.64
GALE	350.512	322.532	377.115	421.645	956.832	950.689	1018.5
HMGCL	318.561	339.119	317.94	367.713	316.825	287.487	312.801
FUCA1	447.302	410.076	445.317	455.965	489.542	474.849	540.095
CNR2	1.87942	0	0	0	2.11923	0	0
PNRC2	2212.08	2044.85	2188.47	2126.85	2442.41	2459.5	2832.52
SRSF10	4039.81	4154.21	4807.22	4263.51	3178.85	3249.59	3283.86
MYOM3	0.939709	3.68608	1.00297	0	2.11923	5.948	18.4
IL22RA1	0.939709	0.921519	3.0089	0	194.969	167.535	128.8
IFNLR1	230.229	283.828	205.608	218.667	431.263	476.831	431.86
LOC105376871	7.51767	7.37215	0	0.980569	3.17885	0.991333	0
GRHL3	16.9148	20.2734	10.0297	12.7474	425.965	481.788	378.824
STPG1	339.235	330.825	298.884	307.899	416.429	440.152	505.46
NIPAL3	964.142	877.286	816.415	765.824	2217.77	2294.94	2400.66
RCAN3	819.426	691.139	599.774	716.796	792.592	825.781	792.284
LOC100506985	2.81913	3.68608	1.00297	5.88341	0	1.98267	2.16471
NCMAP	2.81913	0	1.00297	0.980569	1.05962	0.991333	0
SRRM1	4263.46	4368	5009.82	3895.8	3258.32	3414.15	3624.81
CLIC4	3582.17	3463.07	2704	3553.58	4527.74	4355.92	3597.75
RUNX3	231.168	263.555	50.1483	174.541	947.296	919.957	844.237
SYF2	665.314	676.395	648.919	547.158	916.567	811.902	851.813
RSRP1	941.589	1021.96	997.952	713.854	1045.84	971.507	829.084
RHD	0	0	0	0	0	1.98267	3.24706
TMEM50A	2225.23	2109.36	2018.97	2204.32	2217.77	2264.21	2478.59
RHCE	27.2516	24.881	10.0297	15.6891	22.2519	10.9047	11.9059
MACO1	783.717	704.041	669.982	690.321	810.606	802.98	809.601
LDLRAP1	617.389	621.104	662.961	601.089	1156.04	1148.96	1019.58
MAN1C1	118.403	92.1519	63.1869	87.2706	14.8346	7.93067	10.8235
SELENON	1832.43	1862.39	2067.11	1897.4	1242.93	1174.73	1262.03
MTFR1L	518.719	540.932	656.943	605.011	357.09	313.261	297.648
AUNIP	442.603	478.269	485.436	500.09	341.196	329.123	352.848
PAQR7	162.57	128.091	126.374	127.474	1004.52	931.853	918.919
STMN1	4709.82	4821.39	4816.25	5025.42	5878.74	6221.61	6094.74
PAFAH2	197.339	178.775	226.67	174.541	511.794	466.918	443.765
EXTL1	29.131	22.1165	0	6.86398	1.05962	0	2.16471
SLC30A2	0	0.921519	0	0	0	0.991333	1.08235
TRIM63	0.939709	1.84304	0	0	0	0	0
PDIK1L	430.387	398.096	503.489	438.314	384.64	411.403	405.883
FAM110D	2.81913	5.52912	2.00593	9.80569	1.05962	4.95667	4.32942
ZNF593	626.786	643.22	731.163	739.349	333.779	418.343	448.095
CNKSR1	36.6487	31.3317	41.1216	34.3199	743.85	680.055	703.531
CATSPER4	9.39709	0.921519	0	0	2.11923	0	1.08235
CEP85	1178.4	1168.49	1259.73	1205.12	1309.68	1295.67	1284.76
SH3BGRL3	413.472	312.395	329.976	289.268	3461.76	3753.19	3670.27
UBXN11	426.628	467.21	535.584	446.159	450.336	438.169	425.365
CD52	0.939709	0.921519	0	0	0	0	0
CRYBG2	19.7339	10.1367	23.0682	13.728	1245.05	1131.11	960.049
LIN28A	2.81913	0	0	0	0	0.991333	0
DHDDS	505.564	500.385	524.551	514.799	664.379	670.141	856.143
LOC101928324	1.87942	3.68608	4.01187	7.84455	1.05962	1.98267	1.08235
HMGN2	11467.3	12364	15767.6	15699.9	12947.4	13813.2	14649.7
RPS6KA1	731.094	739.98	619.833	723.66	1292.73	1310.54	1425.46
LOC101928728	13.1559	8.29367	8.02373	4.90285	23.3115	21.8093	11.9059
ARID1A	2578.56	2605.14	2395.08	2259.23	2871.56	2846.12	2398.5
PIGV	101.489	113.347	117.347	91.1929	300.931	261.712	252.189
ZDHHC18	823.185	796.193	831.459	793.28	975.906	934.827	940.566
SFN	10.3368	1.84304	273.81	3.92228	9907.4	10345.6	12454.7
GPN2	917.156	868.071	883.614	932.521	1022.53	956.637	1052.05
GPATCH3	367.426	355.706	396.172	373.597	412.19	421.317	421.036
NUDC	3677.08	3695.29	3989.8	3735.97	3979.91	4147.74	4418.17
NR0B2	1.87942	0	0	0	0	0	0
KDF1	0	0	3.0089	0	398.415	408.429	414.542
TRNP1	297.888	266.319	239.709	263.773	1672.07	1934.09	2522.97
TENT5B	32.8898	24.881	13.0386	22.5531	566.894	616.609	603.954
SLC9A1	719.817	624.79	447.323	452.042	1911.55	2050.08	2515.39
WDTC1	1329.69	1282.75	1231.64	1285.53	1685.85	1688.24	1618.12
TMEM222	525.297	563.048	556.646	578.536	687.69	690.959	763.06
SYTL1	33.8295	43.3114	35.1038	29.4171	447.158	356.88	329.036
MAP3K6	222.711	230.38	233.691	216.706	750.208	802.98	741.413
FCN3	1.87942	0.921519	0	0	0	1.98267	1.08235
CD164L2	11.2765	5.52912	1.00297	3.92228	9.53654	6.93933	4.32942
GPR3	26.3119	15.6658	17.0504	22.5531	19.0731	39.6533	62.7766
WASF2	2392.5	2266.94	2371.01	2470.05	3595.27	3539.06	3283.86
AHDC1	419.11	390.724	381.127	302.996	962.131	884.269	721.931
IFI6	105.247	72.8	51.1513	54.9119	3439.51	3934.6	2663.68
FAM76A	391.859	368.608	451.335	472.634	198.148	223.05	228.377
STX12	1643.55	1659.66	1288.81	1455.16	1132.73	1194.56	1184.1
PPP1R8	2618.03	2481.65	2569.6	2550.46	1382.8	1416.62	1420.05
SCARNA1	1.87942	3.68608	2.00593	9.80569	3.17885	0.991333	1.08235
THEMIS2	104.308	90.3089	93.2759	97.0763	265.963	257.747	169.93
RPA2	3376.38	3159.89	2928.66	3453.56	1677.37	1817.11	1821.6
SMPDL3B	166.329	157.58	183.543	164.736	662.259	577.947	518.448
XKR8	215.193	271.848	280.831	173.561	296.692	312.27	313.883
EYA3	1370.1	1347.26	1469.35	1219.83	907.031	905.087	888.613
PTAFR	31.9501	35.0177	22.0653	27.4559	582.788	515.493	482.73
DNAJC8	4819.77	4759.65	4695.89	4832.24	2304.66	2459.5	2663.68
ATP5IF1	3144.27	3067.74	2931.67	3039.76	1900.95	1996.55	1889.79
SESN2	1354.12	1388.73	901.667	1423.79	534.046	563.077	492.471
MED18	414.412	394.41	395.169	393.208	395.236	400.499	386.401
PHACTR4	1668.92	1711.26	1793.3	1531.65	2066.25	2060.98	1828.1
RCC1	4979.52	4835.21	6033.85	5335.28	3209.57	3369.54	3294.69
SNHG3	990.453	998.005	1053.11	1065.88	779.877	845.607	939.484
SNORA73B	24.4324	34.0962	38.1127	20.592	13.775	22.8007	17.3177
TRNAU1AP	559.127	643.22	591.75	568.73	561.596	474.849	585.554
SNHG12	344.873	376.901	352.041	308.879	518.152	474.849	534.683
SNORD99	9.39709	4.6076	15.0445	5.88341	6.35769	8.922	11.9059
TAF12	654.038	684.689	549.626	605.011	498.019	508.554	470.824
RAB42	0	0	1.00297	0	41.325	48.5753	33.553
LINC01715	12.2162	12.9013	18.0534	14.7085	3.17885	6.93933	8.65884
GMEB1	598.595	601.752	468.385	626.584	414.31	460.97	522.777
YTHDF2	3656.41	3742.29	3622.72	3701.65	2134.06	2225.54	2331.39
OPRD1	77.0562	41.4684	25.0742	34.3199	0	0.991333	1.08235
EPB41	4946.63	4891.42	5013.83	4750.86	979.084	879.313	758.731
TMEM200B	45.106	30.4101	40.1187	38.2422	457.754	503.597	534.683
SRSF4	3478.8	3417.92	3747.08	3344.72	2180.69	2247.35	2172.29
MECR	655.917	644.142	754.231	754.058	401.594	460.97	450.26
PTPRU	2215.83	2021.81	1623.8	2220.99	1496.18	1346.23	948.143
MATN1	12.2162	23.038	10.0297	13.728	2.11923	4.95667	2.16471
MATN1-AS1	31.9501	28.5671	19.0564	36.2811	16.9538	24.7833	17.3177
LAPTM5	1.87942	5.52912	1.00297	0	44.5038	33.7053	45.4589
LINC01778	1.87942	0.921519	2.00593	0.980569	2.11923	0	3.24706
SDC3	1300.56	1175.86	828.45	1059.01	711.002	662.211	673.225
PUM1	3607.54	3863.93	3358.93	3058.39	2458.31	2346.49	2215.58
NKAIN1	154.112	83.8583	92.2729	100.018	2.11923	0	3.24706
SNRNP40	1933.92	1972.97	2160.39	2178.82	1040.54	1144	1138.64
ZCCHC17	1418.96	1350.03	1273.77	1355.15	998.157	1086.5	1101.84
FABP3	5.63826	7.37215	1.00297	8.82512	5.29808	0.991333	3.24706
SERINC2	375.884	349.256	280.831	218.667	4506.54	4661.25	4549.14
LINC01226	0	0.921519	0	1.96114	2.11923	4.95667	3.24706
TINAGL1	0.939709	0.921519	79.2344	0	4765.09	5049.85	5415.02
HCRTR1	39.4678	31.3317	43.1276	25.4948	13.775	15.8613	30.3059
PEF1	2415.05	2412.54	2640.81	2572.03	1367.96	1314.51	1401.65
COL16A1	17.8545	19.3519	45.1335	10.7863	3030.5	3061.24	3432.15
ADGRB2	584.499	607.281	261.774	405.956	318.944	264.686	168.847
MIR4254	0	1.84304	0	0	0	0	2.16471
SPOCD1	80.815	60.8203	30.089	24.5142	528.748	697.899	834.496
PTP4A2	5043.42	5172.49	5429.06	5635.33	3926.93	4067.44	4234.17
KHDRBS1	7453.77	7271.71	8033.76	7985.75	4785.22	4988.39	5023.21
TMEM39B	389.979	420.213	515.525	417.722	432.323	440.152	421.036
KPNA6	2719.52	2760.87	2484.35	2383.76	2339.63	2387.13	2349.79
TXLNA	3687.42	3822.46	3516.4	3109.38	3979.91	4161.62	4311.02
CCDC28B	353.331	387.96	301.893	375.558	157.883	158.613	114.73
IQCC	380.582	395.332	378.118	432.431	264.904	271.625	278.165
DCDC2B	13.1559	8.29367	8.02373	3.92228	1.05962	0.991333	5.41177
TMEM234	311.983	329.904	327.97	231.414	194.969	193.31	203.483
EIF3I	7972.49	8039.33	9383.75	9188.91	4932.51	5294.71	5845.8
MTMR9LP	0.939709	3.68608	4.01187	0	74.1731	52.5407	37.8824
FAM167B	1.87942	4.6076	1.00297	0.980569	23.3115	14.87	15.153
LCK	0.939709	0.921519	1.00297	0	42.3846	37.6707	32.4706
HDAC1	7048.76	6822.01	6461.11	5478.44	4758.73	4615.65	4670.36
MARCKSL1	8479	8430.98	8303.56	8214.23	3373.81	3042.4	2502.4
TSSK3	26.3119	33.1747	16.0475	16.6697	2.11923	5.948	2.16471
FAM229A	425.688	446.015	371.098	331.432	50.8615	37.6707	47.6236
BSDC1	2384.04	2377.52	1953.78	1801.31	1329.82	1339.29	1310.73
ZBTB8B	105.247	161.266	98.2907	107.863	19.0731	11.896	16.2353
ZBTB8A	244.324	189.833	197.584	198.075	178.015	196.284	186.165
ZBTB8OS	591.077	604.517	547.62	568.73	508.615	526.398	586.636
RBBP4	8962.95	8626.34	8513.18	8381.9	4737.54	4725.69	4585.94
SYNC	80.815	64.5064	56.1661	48.0479	63.5769	54.5233	48.706
KIAA1522	1185.91	1213.64	865.56	933.502	4220.45	3655.05	3318.5
YARS	6238.73	6213.8	6275.56	7504.3	2905.46	3299.16	3013.28
S100PBP	872.05	866.228	848.51	747.194	747.029	702.855	619.107
FNDC5	56.3826	40.5469	26.0771	20.592	9.53654	12.8873	3.24706
HPCA	29.131	24.881	12.0356	23.5337	87.9481	92.194	72.5178
TMEM54	189.821	143.757	107.317	107.863	1185.71	1118.22	1152.71
RNF19B	638.063	641.377	553.638	521.663	792.592	815.867	805.272
AK2	7209.45	7256.04	7823.14	7778.85	4183.36	4402.51	4427.91
AZIN2	151.293	126.248	98.2907	117.668	44.5038	23.792	24.8942
TRIM62	293.189	325.296	227.673	221.609	186.492	150.683	154.777
ZNF362	582.62	563.97	529.566	609.914	475.767	378.689	240.283
A3GALT2	0.939709	1.84304	7.02077	1.96114	2.11923	5.948	1.08235
PHC2	1546.76	1532.49	1588.7	1694.42	1360.55	1311.53	1390.83
MIR3605	0	0	2.00593	0.980569	0	0	1.08235
LOC101929464	15.0353	7.37215	13.0386	8.82512	6.35769	4.95667	0
ZSCAN20	170.087	193.519	148.439	154.93	128.213	141.761	102.824
CSMD2	15.9751	9.21519	0	0	0	0	1.08235
SMIM12	686.927	609.124	683.02	723.66	914.448	923.923	1073.7
GJB5	0	0	15.0445	0	709.942	700.873	726.26
GJB4	0	0	1.00297	0	32.8481	33.7053	23.8118
GJB3	0	0.921519	15.0445	0	1773.8	1850.82	2101.93
GJA4	0	0	0	0	0	0.991333	3.24706
DLGAP3	55.4428	24.881	7.02077	18.6308	2.11923	2.974	2.16471
LOC653160	1.87942	1.84304	1.00297	0.980569	3.17885	4.95667	1.08235
ZMYM6	265.938	243.281	267.792	253.967	211.923	222.059	196.989
ZMYM1	781.838	796.193	769.275	706.01	744.909	718.717	668.895
LOC105378644	0	0.921519	0	0.980569	1.05962	0	0
SFPQ	13617.3	14308.4	15739.6	14738.9	8380.5	8738.6	8453.19
ZMYM4	2648.1	2792.2	2808.31	2328.85	1831.01	1792.33	1596.47
ZMYM4-AS1	6.57796	9.21519	9.0267	3.92228	4.23846	2.974	4.32942
KIAA0319L	1074.09	1007.22	1141.38	1036.46	1204.78	1202.49	1091.01
NCDN	1578.71	1611.74	1645.87	1427.71	1412.47	1569.28	1512.05
LOC105378645	0.939709	1.84304	1.00297	3.92228	2.11923	2.974	1.08235
TFAP2E	9.39709	3.68608	13.0386	7.84455	9.53654	3.96533	7.57648
PSMB2	3632.92	3687	3860.42	3999.74	5295.96	5514.79	5563.3
C1orf216	170.087	182.461	230.682	151.988	513.913	517.476	549.836
CLSPN	1872.84	1901.09	1981.86	1675.79	1607.44	1902.37	1995.86
AGO4	363.667	410.076	366.083	439.295	351.792	370.759	286.824
AGO1	1518.57	1564.74	1693.01	1468.89	1391.27	1407.69	1344.28
AGO3	786.537	753.803	719.127	634.428	802.129	758.37	764.143
TEKT2	4.69855	10.1367	11.0326	10.7863	0	3.96533	0
ADPRHL2	481.131	477.347	538.593	563.827	606.1	665.185	733.837
COL8A2	1.87942	1.84304	1.00297	0	176.956	161.587	161.271
TRAPPC3	1166.18	1042.24	1121.32	1022.73	1258.82	1287.74	1376.76
MAP7D1	2164.15	2113.97	1695.01	1894.46	6644.85	6952.22	7397.9
THRAP3	4857.36	4840.74	4897.49	4812.63	4040.31	3998.05	4334.83
SH3D21	262.179	246.046	191.567	163.755	626.233	566.051	422.118
EVA1B	53.5634	49.762	38.1127	60.7953	128.213	171.501	153.694
STK40	1124.83	1051.45	1233.65	1056.07	822.261	798.023	779.295
LSM10	565.705	516.051	593.756	631.486	363.448	431.23	389.648
OSCP1	97.7298	91.2304	97.2878	105.901	43.4442	43.6187	35.7177
MRPS15	1384.19	1368.46	1558.61	1595.39	1556.57	1657.51	1757.74
GRIK3	26.3119	15.6658	0	0	0	0	0
LINC01137	14.0956	10.1367	3.0089	4.90285	61.4577	40.6447	48.706
ZC3H12A	87.393	93.0735	100.297	76.4844	1026.77	717.725	508.707
MEAF6	1012.07	973.124	1108.28	1085.49	897.494	1037.93	984.943
MIR5581	4.69855	6.45064	4.01187	0	8.47692	2.974	8.65884
SNIP1	475.493	522.501	418.237	492.246	528.748	554.155	561.742
DNALI1	11.2765	12.9013	11.0326	7.84455	2.11923	4.95667	6.49413
GNL2	2543.79	2452.16	2575.62	2802.47	1467.57	1639.67	1760.99
RSPO1	0	1.84304	0	0.980569	0	0.991333	0
C1orf109	1298.68	1277.23	1345.98	1480.66	717.359	827.763	834.496
CDCA8	1666.1	1667.95	1357.01	1509.1	2176.45	2371.27	2715.63
EPHA10	40.4075	42.3899	32.0949	37.2616	25.4308	26.766	15.153
MANEAL	876.749	858.856	1035.06	980.569	834.977	908.061	733.837
YRDC	836.341	896.638	1027.04	1118.83	972.727	1077.58	1292.33
C1orf122	646.52	626.633	606.795	692.282	1407.17	1484.03	1580.24
MTF1	407.834	448.78	374.107	376.539	793.652	800.997	689.46
INPP5B	483.011	471.818	441.305	481.459	252.188	182.405	216.471
SF3A3	3329.39	3221.63	3941.66	3512.4	2354.46	2484.28	2771.91
FHL3	286.611	317.003	267.792	227.492	342.256	331.105	343.106
UTP11	1352.24	1443.1	1497.43	1552.24	1196.31	1300.63	1503.39
POU3F1	67.6591	83.8583	63.1869	73.5427	10.5962	33.7053	22.7295
RRAGC	320.441	275.534	316.937	275.54	420.667	426.273	478.401
LOC105378663	34.7692	28.5671	25.0742	18.6308	11.6558	13.8787	23.8118
MYCBP	459.518	440.486	547.62	498.129	469.409	419.334	539.013
RHBDL2	2.81913	0.921519	5.01483	0.980569	158.942	144.735	128.8
AKIRIN1	2992.97	2914.77	2637.8	2817.17	3061.23	3422.08	3508.99
NDUFS5	2507.14	2554.45	2696.98	2876.01	2087.44	2063.96	2226.4
MACF1	2816.31	2611.59	2788.25	2511.24	4820.19	4839.69	4390.03
BMP8A	18.7942	16.5873	18.0534	20.592	4.23846	5.948	4.32942
OXCT2P1	0	0.921519	0	2.94171	11.6558	6.93933	5.41177
PPIEL	171.027	181.539	208.617	179.444	40.2654	38.662	47.6236
PABPC4	4919.38	5100.61	5879.39	5268.6	6522.99	7225.83	7686.88
PABPC4-AS1	98.6695	67.2709	100.297	65.6981	99.6038	143.743	134.212
SNORA55	19.7339	12.9013	15.0445	22.5531	5.29808	10.9047	23.8118
HEYL	173.846	184.304	162.481	166.697	7.41731	0.991333	6.49413
NT5C1A	22.553	12.9013	13.0386	18.6308	0	0	4.32942
HPCAL4	87.393	70.957	70.2077	93.1541	43.4442	53.532	46.5413
PPIE	1047.78	986.947	1048.1	1089.41	1029.95	1082.54	1138.64
BMP8B	230.229	248.81	251.745	245.142	86.8884	83.272	53.0354
OXCT2	18.7942	22.1165	21.0623	15.6891	43.4442	32.714	34.6354
LOC101929536	6.57796	12.9013	18.0534	17.6502	0	2.974	3.24706
TRIT1	511.202	510.522	523.549	521.663	543.583	490.71	540.095
MYCL	213.314	161.266	135.4	197.094	147.287	81.2893	64.9413
LOC105378668	4.69855	6.45064	3.0089	3.92228	6.35769	0.991333	7.57648
MFSD2A	224.59	158.501	175.519	187.289	221.46	191.327	311.718
CAP1	3357.58	3270.47	3322.83	3432.97	7050.68	7616.41	8697.8
PPT1	2647.16	2535.1	3092.15	2935.82	3222.29	3049.34	3586.92
RLF	999.851	973.124	1004.97	888.396	563.715	644.367	636.425
TMCO2	0.939709	0.921519	0	0	2.11923	0.991333	0
ZMPSTE24	2131.26	2104.75	2242.63	2301.4	2732.75	2999.78	3421.32
COL9A2	30.0707	24.881	21.0623	38.2422	269.142	168.527	109.318
SMAP2	856.075	903.089	866.563	899.182	745.969	717.725	851.813
ZFP69B	72.3576	68.1924	85.2522	72.5621	64.6365	82.2807	67.106
ZFP69	139.077	156.658	200.593	179.444	108.081	107.064	107.153
EXO5	111.825	125.327	131.389	128.455	219.34	255.764	231.624
ZNF684	101.489	123.484	125.371	114.727	67.8154	92.194	86.5884
RIMS3	202.977	176.932	137.406	212.783	40.2654	57.4973	38.9648
NFYC	779.959	794.35	849.513	836.425	868.884	816.859	839.907
KCNQ4	96.79	73.7215	84.2492	94.1346	0	0.991333	0
CITED4	42.2869	43.3114	63.1869	46.0867	350.733	322.183	338.777
CTPS1	4481.47	4402.1	5056.96	4485.12	3532.76	4021.84	4378.13
SLFNL1-AS1	95.8503	100.446	109.323	64.7176	50.8615	52.5407	58.4472
SLFNL1	12.2162	4.6076	14.0415	2.94171	2.11923	9.91333	2.16471
SCMH1	545.971	629.398	635.881	657.962	514.973	594.8	618.025
LOC102723924	0	0.921519	0	0	2.11923	0	0
FOXO6	125.921	99.5241	63.1869	110.804	36.0269	22.8007	27.0589
LOC101929901	0	0	0	0	0	0	2.16471
EDN2	0.939709	0	0	0.980569	0	1.98267	0
HIVEP3	77.0562	92.1519	62.1839	86.2901	140.929	136.804	108.235
FOXJ3	1147.38	1203.5	1122.32	1132.56	1464.39	1473.12	1487.16
RIMKLA	175.726	158.501	186.552	188.269	0	0.991333	1.08235
ZMYND12	0	0	0	1.96114	2.11923	0	3.24706
PPCS	352.391	344.648	377.115	445.178	857.229	870.391	805.272
CCDC30	35.7089	27.6456	43.1276	43.145	19.0731	23.792	14.0706
PPIH	901.181	876.365	1101.26	1157.07	701.465	768.283	785.79
YBX1	26942.4	28435.3	31130.1	31772.4	21138.3	22423	24778.3
CLDN19	0	1.84304	0	0	0	0	0
P3H1	1339.09	1394.26	1250.7	1247.28	433.383	452.048	449.177
C1orf50	92.0915	81.0937	71.2106	69.6204	101.723	74.35	70.3531
TMEM269	25.3721	20.2734	45.1335	27.4559	9.53654	6.93933	6.49413
SVBP	267.817	295.808	266.789	328.491	200.267	224.041	208.894
ERMAP	137.198	139.149	120.356	106.882	267.023	270.634	259.765
ZNF691	232.108	235.909	274.813	213.764	196.029	157.622	138.541
SLC2A1	811.909	840.426	906.682	1064.9	4356.08	4454.06	4127.02
SLC2A1-AS1	23.4927	12.9013	4.01187	14.7085	4.23846	6.93933	2.16471
FAM183A	10.3368	4.6076	8.02373	4.90285	18.0135	16.8527	7.57648
EBNA1BP2	2165.09	2134.24	2772.2	2747.55	2652.22	2995.81	3510.08
CFAP57	62.9605	57.1342	63.1869	66.6787	125.035	138.787	121.224
TMEM125	0	0	0	0	187.552	192.319	138.541
C1orf210	1.87942	0.921519	1.00297	0	145.167	174.475	176.424
MPL	1.87942	2.76456	3.0089	0.980569	4.23846	0.991333	3.24706
LOC105378687	8.45738	6.45064	5.01483	4.90285	27.55	26.766	29.2236
CDC20	3933.62	4038.1	3817.29	3543.78	4195.02	4426.3	5124.95
ELOVL1	705.722	704.962	762.255	740.33	2173.27	2410.92	2963.49
MED8	598.595	616.496	669.982	545.196	800.009	845.607	853.978
SZT2	914.337	953.773	843.495	896.24	863.586	866.425	755.484
SZT2-AS1	8.45738	2.76456	8.02373	7.84455	21.1923	31.7227	37.8824
HYI	161.63	159.423	226.67	159.833	1225.97	1437.43	1791.3
PTPRF	4077.4	4159.74	4083.08	3889.92	9238.78	9477.15	10277
KDM4A	835.401	788.821	747.21	640.312	703.584	703.847	666.731
KDM4A-AS1	51.684	57.1342	78.2314	59.8147	48.7423	53.532	60.6119
ST3GAL3	50.7443	65.4279	47.1394	42.1645	33.9077	30.7313	25.9765
ARTN	32.8898	24.881	26.0771	22.5531	387.819	364.811	535.766
IPO13	1150.2	1237.6	1224.62	1092.35	1249.29	1255.03	1416.8
DPH2	1133.29	1242.21	1608.76	1403.19	930.342	965.559	1003.34
ATP6V0B	2402.84	2404.24	2506.41	2698.53	2167.97	2100.64	2471.02
B4GALT2	975.418	996.162	1276.78	1171.78	1043.72	1075.6	1140.8
CCDC24	86.4532	54.3696	54.1602	39.2228	184.373	127.882	145.036
SLC6A9	266.877	289.357	228.676	367.713	720.538	590.835	337.695
LOC107984948	4.69855	0.921519	1.00297	7.84455	11.6558	6.93933	15.153
KLF17	0	0	0	0	3.17885	0.991333	2.16471
DMAP1	793.115	782.37	827.447	629.525	791.532	722.682	794.448
ERI3	1381.37	1259.72	1455.3	1258.07	1145.44	1215.37	1173.27
ERI3-IT1	4.69855	7.37215	5.01483	3.92228	3.17885	5.948	1.08235
RNF220	1408.62	1479.96	1426.22	1555.18	1088.22	1147.96	1104
TMEM53	151.293	116.111	149.442	160.813	157.883	157.622	128.8
ARMH1	17.8545	20.2734	0	2.94171	2.11923	1.98267	1.08235
RNU5F-1	0	1.84304	0	1.96114	0	0	0
RNU5D-1	0	0.921519	0	0.980569	0	3.96533	0
KIF2C	2194.22	2033.79	1513.48	1655.2	2554.73	2691.47	3071.72
RPS8	22244.8	22610.4	24118.3	25867.4	14105.6	14311.9	15685.5
SNORD46	12.2162	13.8228	15.0445	14.7085	2.11923	2.974	8.65884
BEST4	61.0811	2.76456	0	0.980569	14.8346	8.922	12.9883
PLK3	74.237	78.3291	52.1543	80.4067	394.177	437.178	507.624
TCTEX1D4	0	0.921519	0	0	0	3.96533	4.32942
BTBD19	11.2765	17.5089	4.01187	6.86398	116.558	111.029	96.3296
PTCH2	81.7547	49.762	50.1483	43.145	2.11923	6.93933	4.32942
EIF2B3	926.553	977.732	1083.2	979.589	579.609	701.864	807.437
HECTD3	597.655	563.048	592.753	524.604	872.063	852.547	976.284
UROD	1614.42	1811.71	1631.83	1572.83	864.646	858.495	1133.23
ZSWIM5	249.963	207.342	203.602	200.036	4.23846	1.98267	8.65884
LINC01144	6.57796	11.0582	9.0267	6.86398	6.35769	2.974	6.49413
HPDL	0	0.921519	0	0.980569	283.977	240.894	261.93
MUTYH	31.9501	15.6658	37.1098	28.4365	27.55	34.6967	33.553
TOE1	483.011	484.719	562.664	631.486	363.448	400.499	448.095
TESK2	128.74	114.268	115.341	99.0375	113.379	109.047	87.6707
CCDC163	107.127	107.818	85.2522	85.3095	74.1731	74.35	57.3648
MMACHC	663.435	756.567	806.385	781.514	357.09	406.447	343.106
PRDX1	11888.3	11150.4	12667.5	12147.3	8303.14	8498.7	10001
AKR1A1	760.225	861.621	831.459	930.56	751.267	790.093	703.531
NASP	6189.86	6804.5	8036.77	7129.72	4460.98	4257.78	4168.15
CCDC17	15.9751	19.3519	17.0504	15.6891	31.7885	34.6967	20.5647
GPBP1L1	2079.58	2089.08	1883.57	1831.7	2724.27	2631	2713.46
TMEM69	638.063	550.147	528.563	569.711	785.175	831.729	943.813
IPP	292.25	248.81	215.638	173.561	418.548	483.771	417.789
MAST2	902.121	912.304	805.382	779.552	1323.46	1445.36	1377.84
PIK3R3	620.208	628.476	705.085	525.585	610.338	534.329	455.671
LOC101929626	3.75884	3.68608	1.00297	0	1.05962	1.98267	1.08235
TSPAN1	0.939709	0.921519	17.0504	1.96114	968.488	917.975	868.049
POMGNT1	794.994	835.818	862.551	922.716	1929.56	2208.69	2482.92
LURAP1	31.0104	30.4101	34.1009	24.5142	22.2519	13.8787	9.74119
RAD54L	966.021	1061.59	1121.32	934.482	862.527	947.715	924.331
LRRC41	1472.52	1493.78	1633.83	1616.96	1719.76	1777.46	1792.38
UQCRH	3870.66	3980.04	4160.31	4013.47	2402.15	2503.12	2677.75
NSUN4	697.264	634.927	664.967	593.244	629.411	619.583	677.554
FAAH	34.7692	38.7038	48.1424	40.2033	11.6558	6.93933	16.2353
DMBX1	133.439	132.699	95.2818	139.241	18.0135	2.974	7.57648
MKNK1-AS1	8.45738	7.37215	4.01187	4.90285	11.6558	8.922	6.49413
MKNK1	518.719	494.856	509.507	506.954	1057.5	1042.88	1085.6
MOB3C	27.2516	27.6456	31.092	26.4754	508.615	422.308	471.907
ATPAF1	2119.98	2190.45	2691.96	2426.91	949.415	1072.62	1023.91
TEX38	0.939709	0	0	0	1.05962	0	0
EFCAB14-AS1	1.87942	2.76456	0	0	4.23846	8.922	8.65884
EFCAB14	944.408	898.481	772.284	720.718	2515.53	2533.85	2543.53
CYP4B1	0	0	0	0	10.5962	1.98267	0
CYP4X1	121.222	73.7215	11.0326	27.4559	12.7154	19.8267	20.5647
LINC00853	7.51767	1.84304	1.00297	6.86398	2.11923	3.96533	0
PDZK1IP1	0	0	0	0	86.8884	26.766	16.2353
TAL1	18.7942	26.7241	30.089	36.2811	0	0	0
STIL	1119.19	1218.25	902.67	920.754	1696.44	1731.86	1765.32
CMPK1	1760.08	1792.36	1799.32	1895.44	4619.92	4724.7	5050.27
FOXE3	1.87942	1.84304	0	0	8.47692	6.93933	18.4
FOXD2-AS1	141.896	144.679	84.2492	84.3289	26.4904	19.8267	36.8001
FOXD2	110.886	92.1519	101.3	104.921	5.29808	8.922	7.57648
LINC01738	1.87942	0	2.00593	2.94171	0	0	0
TRABD2B	56.3826	52.5266	49.1454	70.601	3.17885	0.991333	1.08235
SLC5A9	0	0.921519	1.00297	0.980569	0	0	0
SPATA6	101.489	78.3291	93.2759	80.4067	19.0731	16.8527	10.8235
AGBL4	10.3368	0	1.00297	0	0	0	0
BEND5	9.39709	4.6076	1.00297	6.86398	0	0	0
DMRTA2	12.2162	1.84304	0	2.94171	0	0	2.16471
FAF1	1017.71	1140.84	1080.19	1274.74	1246.11	1211.41	1347.53
CDKN2C	822.246	888.345	563.667	795.242	796.831	886.252	857.225
C1orf185	1.87942	2.76456	0	0	0	0	0
LINC01562	0	0.921519	2.00593	0.980569	0	0.991333	0
RNF11	1147.38	1182.31	849.513	1025.68	2040.82	2050.08	2455.86
TTC39A	140.956	116.111	166.492	141.202	55.1	45.6013	34.6354
TTC39A-AS1	4.69855	0.921519	1.00297	0	0	0.991333	1.08235
EPS15	1403.93	1320.54	1154.41	1277.68	1299.09	1356.14	1397.32
OSBPL9	1631.34	1660.58	1582.68	1719.92	1710.22	1838.92	1726.36
NRDC	3406.45	3381.05	3487.31	3516.32	4773.57	4855.55	4719.07
LOC105378721	8.45738	1.84304	1.00297	7.84455	4.23846	7.93067	2.16471
RAB3B	199.218	200.891	103.306	161.794	1032.07	1126.15	1206.83
TXNDC12	112.765	103.21	71.2106	115.707	102.783	96.1593	97.4119
KTI12	84.5738	88.4659	81.2403	75.5038	66.7558	79.3067	58.4472
BTF3L4	1407.68	1437.57	1379.08	1420.84	1316.04	1291.71	1333.46
ZFYVE9	639.002	575.028	644.907	598.147	630.471	631.479	628.848
CC2D1B	892.724	877.286	916.711	787.397	1266.24	1553.42	1661.41
ORC1	860.774	904.01	883.614	879.57	661.2	698.89	717.601
PRPF38A	2153.81	2176.63	2139.33	2227.85	1139.09	1100.38	1095.34
TUT4	1840.89	1869.76	1810.35	1609.11	1146.5	926.897	866.966
GPX7	0	0.921519	0	0	56.1596	29.74	28.1412
SHISAL2A	0	0	2.00593	0	31.7885	45.6013	57.3648
COA7	1618.18	1612.66	1777.26	1825.82	1291.67	1416.62	1438.45
ZYG11B	1340.97	1206.27	1195.54	1284.55	813.784	758.37	778.213
ZYG11A	516.84	484.719	394.166	416.742	404.773	357.871	317.13
ECHDC2	20.6736	8.29367	8.02373	13.728	632.59	594.8	455.671
SCP2	1569.31	1495.63	1555.6	1453.2	1856.45	2042.15	1937.42
SLC1A7	0.939709	0.921519	0	0	0	0	0
CPT2	830.703	844.112	906.682	929.579	430.204	490.71	469.742
C1orf123	446.362	550.147	586.735	584.419	404.773	432.221	429.695
MAGOH	1245.11	1244.05	1551.59	1414.96	848.752	855.521	958.966
LOC100507564	7.51767	10.1367	7.02077	13.728	16.9538	22.8007	14.0706
LRP8	585.439	645.064	729.157	642.273	1129.55	1140.03	1092.1
LINC01771	2.81913	0.921519	0	4.90285	0	7.93067	0
GLIS1	31.9501	23.038	29.086	18.6308	0	0	0
NDC1	2675.35	2699.13	3149.31	2983.87	2181.75	2189.86	2267.53
YIPF1	266.877	232.223	307.911	249.065	734.313	646.349	714.354
HSPB11	617.389	637.691	582.724	656.001	750.208	795.049	734.919
LRRC42	756.466	701.276	645.91	706.01	1171.93	1127.15	1086.68
TMEM59	1886	1885.43	1521.5	1787.58	3354.74	3177.22	3063.06
TCEANC2	1098.52	1174.02	1015	1072.74	454.575	417.351	360.424
CYB5RL	464.216	468.132	509.507	488.323	212.983	195.293	165.6
MRPL37	4017.26	3839.05	4694.89	4452.76	2333.27	2396.05	2597.65
SSBP3	2052.32	1779.45	1865.52	1539.49	843.454	836.685	779.295
SSBP3-AS1	1.87942	0.921519	3.0089	3.92228	0	0	0
ACOT11	39.4678	29.4886	36.1068	23.5337	429.144	411.403	455.671
FAM151A	6.57796	3.68608	0	0.980569	19.0731	12.8873	20.5647
TTC4	15.9751	14.7443	16.0475	9.80569	9.53654	8.922	15.153
PARS2	281.913	327.139	315.934	332.413	120.796	114.003	122.306
TTC22	0	0.921519	3.0089	0	545.702	478.814	506.542
LEXM	0	0.921519	0	0	3.17885	0.991333	1.08235
DHCR24	5835.59	5628.64	5773.08	4997.96	6218.88	6245.4	6318.79
TMEM61	0	0	0	0	4.23846	0.991333	5.41177
BSND	3.75884	0	1.00297	0.980569	0	0	0
PCSK9	3.75884	0.921519	5.01483	1.96114	875.242	581.913	355.012
USP24	3153.66	3082.48	3221.53	2868.16	2027.04	1979.69	1870.31
LINC01767	1.87942	2.76456	1.00297	1.96114	0	0	0
PLPP3	349.572	314.238	256.759	242.201	72.0538	76.3327	63.8589
PRKAA2	1144.57	1096.61	1161.44	1160.01	161.061	119.951	152.612
FYB2	0	0.921519	1.00297	0	0	3.96533	0
DAB1	223.651	135.463	27.0801	39.2228	0	0	0
DAB1-AS1	0	0	0	3.92228	0	0	0
OMA1	333.597	371.372	465.376	334.374	205.565	211.154	188.33
TACSTD2	0	1.84304	201.596	0.980569	38241.5	37638	26224.4
MYSM1	2337.06	2542.47	2287.77	2106.26	1299.09	1324.42	1165.7
JUN	5769.81	7602.53	5102.09	5133.28	2041.88	2159.12	2496.99
LINC01135	2.81913	1.84304	0	0	30.7288	25.7747	17.3177
LOC105378753	6.57796	0.921519	0	2.94171	2.11923	3.96533	4.32942
HSD52	9.39709	13.8228	20.0593	17.6502	12.7154	3.96533	10.8235
FGGY	44.1663	58.0557	50.1483	53.9313	154.704	131.847	132.047
HOOK1	1494.14	1506.68	1800.32	1442.42	1240.81	1172.75	1009.84
CYP2J2	62.0208	60.8203	52.1543	60.7953	52.9808	84.2633	48.706
LINC01748	42.2869	15.6658	41.1216	29.4171	1.05962	0	1.08235
LOC101926964	2.81913	5.52912	2.00593	0	0	0	0
NFIA	541.272	622.947	556.646	578.536	492.721	449.074	444.848
NFIA-AS2	4.69855	1.84304	0	0.980569	0	0	0
TM2D1	482.071	465.367	468.385	501.071	372.985	393.559	456.754
PATJ	516.84	420.213	469.388	415.761	1458.03	1515.75	1404.9
KANK4	3.75884	3.68608	4.01187	1.96114	12.7154	5.948	11.9059
USP1	4368.71	4476.74	4756.07	4957.76	2671.29	2768.79	2932.1
DOCK7	1717.79	1749.04	1855.49	2002.32	1156.04	1252.05	1213.32
ATG4C	693.505	775.919	794.349	829.561	364.508	315.244	297.648
LINC00466	1.87942	0	4.01187	0	1.05962	0.991333	0
FOXD3-AS1	166.329	176.932	99.2937	136.299	0	0	0
FOXD3	188.882	249.732	153.454	167.677	0	0	0
ALG6	1087.24	1138.08	1311.88	1236.5	480.006	538.294	519.53
ITGB3BP	992.333	1139.92	1321.91	1302.2	577.49	561.095	598.542
EFCAB7	327.959	328.061	361.068	330.452	221.46	177.449	120.141
PGM1	1362.58	1304.87	1627.81	1519.88	927.163	840.651	882.119
ROR1	326.079	305.944	178.528	271.618	108.081	115.986	109.318
ROR1-AS1	7.51767	3.68608	2.00593	0	0	0	0
UBE2U	2.81913	1.84304	1.00297	0	0	0	0
CACHD1	1544.88	1493.78	1342.97	1177.66	224.638	197.275	253.271
RAVER2	1203.77	1332.52	1456.31	1230.61	827.559	818.841	742.495
JAK1	2008.16	2039.32	1828.41	1782.67	2210.36	2052.06	1991.53
LINC01359	13.1559	7.37215	10.0297	14.7085	0	1.98267	1.08235
MIR3671	0.939709	1.84304	7.02077	0.980569	2.11923	0.991333	1.08235
AK4	1720.61	1656.89	1776.25	1937.6	2136.18	2018.35	1848.66
DNAJC6	706.661	716.942	654.937	616.778	175.896	160.596	174.259
LEPROT	608.932	577.793	529.566	645.214	1181.47	1247.1	1092.1
LEPR	740.491	598.066	479.418	669.729	102.783	83.272	73.6001
PDE4B	22.553	25.8025	13.0386	6.86398	3.17885	2.974	3.24706
SGIP1	1.87942	7.37215	2.00593	2.94171	0	3.96533	4.32942
WDR78	85.5135	78.3291	61.181	80.4067	56.1596	57.4973	43.2942
MIER1	1445.27	1358.32	1299.84	1288.47	1207.96	1241.15	1449.27
SLC35D1	666.254	814.623	811.4	774.65	1514.19	1490.97	1449.27
IL23R	0	0.921519	0	0	0	0.991333	0
IL12RB2	50.7443	55.2912	74.2195	71.5815	384.64	358.863	355.012
SERBP1	24562.1	25833	30403.9	29059.2	11037	11615.5	11876.7
GADD45A	439.784	527.109	352.041	431.45	1549.16	1836.94	1827.01
GNG12	2295.71	2041.17	1637.84	2066.06	4024.42	3938.57	4029.61
GNG12-AS1	7.51767	7.37215	6.0178	6.86398	1.05962	0	4.32942
DIRAS3	5.63826	7.37215	6.0178	5.88341	0	0	0
WLS	2793.76	2665.03	2336.91	2574.97	1518.43	1452.3	1506.64
RPE65	1.87942	0.921519	0	0	0	0	0
DEPDC1	3668.62	3623.41	3302.77	3174.1	2670.23	2694.44	2570.59
DEPDC1-AS1	11.2765	3.68608	5.01483	1.96114	20.1327	8.922	15.153
LINC01707	1.87942	0	0	0.980569	0	0	0
LRRC7	46.9855	26.7241	16.0475	25.4948	1.05962	0.991333	3.24706
LRRC40	1551.46	1561.98	1499.43	1508.12	823.321	830.737	823.672
SRSF11	7233.88	7860.56	8186.21	7312.1	4786.28	4606.73	4447.4
ANKRD13C	1218.8	1245.89	1151.41	1248.26	739.611	764.318	754.401
HHLA3	291.31	291.2	234.694	235.337	116.558	116.977	83.3413
CTH	331.717	358.471	271.804	416.742	65.6961	77.324	41.1295
PTGER3	22.553	11.0582	2.00593	8.82512	0	0.991333	0
ZRANB2	4794.4	4964.22	5502.27	5014.63	2435	2295.93	2279.44
MIR186	6.57796	24.881	17.0504	9.80569	8.47692	7.93067	11.9059
ZRANB2-AS2	18.7942	11.9798	12.0356	20.592	4.23846	1.98267	5.41177
NEGR1	1.87942	4.6076	3.0089	1.96114	206.625	310.287	179.671
LRRIQ3	81.7547	89.3874	111.329	113.746	66.7558	40.6447	43.2942
FPGT	361.788	378.744	470.391	444.198	286.096	278.565	241.365
FPGT-TNNI3K	2.81913	4.6076	6.0178	2.94171	0	0	0
TNNI3K	0	0	2.00593	0	0	0	0
LRRC53	2.81913	0	0	0	0	0	0
ERICH3	0	0.921519	0	0	0	0	1.08235
ERICH3-AS1	1.87942	0.921519	1.00297	0	0	0	0
CRYZ	529.056	540.01	588.741	683.457	947.296	954.654	805.272
TYW3	998.911	1156.51	1269.76	1175.7	741.731	758.37	758.731
LHX8	62.0208	92.1519	75.2225	62.7564	0	0	0
SLC44A5	434.146	446.937	508.504	353.985	258.546	242.877	159.106
ACADM	2003.46	2091.85	2405.11	2301.4	962.131	986.377	950.308
RABGGTB	1659.53	1771.16	2116.26	1885.63	1642.4	1653.54	1836.76
MSH4	16.9148	23.038	17.0504	29.4171	1.05962	0	1.08235
ST6GALNAC3	232.108	199.048	168.498	190.23	0	0.991333	0
ST6GALNAC5	69.5385	30.4101	26.0771	42.1645	3.17885	10.9047	14.0706
PIGK	1716.85	1798.81	1822.39	1985.65	1166.64	1129.13	1270.68
AK5	21.6133	16.5873	17.0504	28.4365	0	0	0
ZZZ3	1869.08	2088.16	2115.26	2111.17	1455.91	1499.89	1619.2
USP33	2703.54	2684.39	2612.73	2588.7	1607.44	1573.25	1487.16
MIGA1	826.004	929.813	825.441	965.861	1077.63	1228.26	1221.98
NEXN-AS1	12.2162	11.0582	10.0297	10.7863	9.53654	6.93933	11.9059
NEXN	221.771	242.36	244.724	212.783	154.704	209.171	233.789
FUBP1	5061.27	5388.12	6202.34	5346.06	3388.65	3081.06	3286.03
DNAJB4	561.946	550.147	421.246	362.811	796.831	683.029	616.942
GIPC2	6.57796	2.76456	1.00297	2.94171	73.1134	51.5493	64.9413
MGC27382	0	4.6076	0	0	0	0	0
PTGFR	21.6133	24.881	6.0178	14.7085	0	0	0
IFI44L	19.7339	17.5089	2.00593	5.88341	1408.23	1373	778.213
IFI44	0	1.84304	9.0267	0	2448.77	2556.65	2151.72
ADGRL4	2.81913	0	0	1.96114	29.6692	42.6273	76.8472
ADGRL2	2021.31	2019.97	1720.09	1818.96	1037.36	1060.73	859.39
LINC01361	3.75884	2.76456	6.0178	3.92228	1.05962	0	1.08235
LOC101927560	6.57796	6.45064	2.00593	0.980569	22.2519	14.87	9.74119
TTLL7	374.944	334.512	290.86	347.121	602.921	542.259	559.577
PRKACB	681.289	765.783	763.258	835.445	778.817	978.446	958.966
SAMD13	18.7942	11.9798	24.0712	27.4559	6.35769	5.948	7.57648
UOX	4.69855	2.76456	1.00297	6.86398	0	2.974	1.08235
RPF1	1322.17	1414.53	1647.87	1564.99	916.567	942.758	990.355
GNG5	18.7942	14.7443	9.0267	25.4948	119.737	105.081	113.647
SPATA1	5.63826	4.6076	9.0267	11.7668	12.7154	20.818	6.49413
CTBS	158.811	176.01	127.377	150.027	270.202	306.322	271.671
LOC105378819	3.75884	1.84304	2.00593	2.94171	7.41731	4.95667	5.41177
LINC01555	0.939709	0	0	1.96114	1.05962	1.98267	0
SSX2IP	1409.56	1437.57	1408.17	1514	1359.49	1466.18	1399.48
LPAR3	440.724	409.155	462.368	438.314	664.379	719.708	701.366
MCOLN2	355.21	340.962	431.276	375.558	152.585	188.353	179.671
WDR63	87.393	63.5848	63.1869	59.8147	9.53654	11.896	5.41177
MCOLN3	446.362	445.094	421.246	392.228	534.046	528.381	547.672
SYDE2	276.275	278.299	272.807	249.065	234.175	255.764	255.436
C1orf52	812.848	866.228	901.667	865.843	565.834	616.609	656.989
BCL10	401.256	424.82	367.086	362.811	921.865	859.486	839.907
DDAH1	1234.78	1102.14	1114.3	1157.07	1745.19	1690.22	1664.66
CYR61	256.541	312.395	245.727	167.677	20647.7	22457.7	24855.2
ZNHIT6	1532.67	1585.01	1830.41	1662.06	963.19	970.515	963.296
COL24A1	66.7194	90.3089	54.1602	51.9702	4.23846	4.95667	2.16471
ODF2L	716.058	751.038	726.148	710.913	810.606	701.864	702.448
MIR7856	0	3.68608	2.00593	0	0	0	0
CLCA2	1.87942	1.84304	17.0504	0	171.658	152.665	103.906
CLCA4	0	0	5.01483	0	3.17885	1.98267	8.65884
CLCA3P	0	0	0	0	6.35769	9.91333	27.0589
CLCA4-AS1	5.63826	11.0582	5.01483	14.7085	6.35769	13.8787	12.9883
SH3GLB1	1886.94	1905.7	1938.73	1905.25	2408.51	2462.47	2490.5
SELENOF	2985.46	2926.75	3212.5	3470.23	2524	2638.93	2809.79
HS2ST1	1079.73	1048.69	986.919	1172.76	1176.17	1135.08	1228.47
LINC01140	0.939709	8.29367	7.02077	5.88341	6.35769	4.95667	1.08235
LOC101927844	2.81913	0	0	0	1.05962	1.98267	1.08235
LMO4	1187.79	1144.53	1177.48	1253.17	695.108	721.691	681.884
PKN2-AS1	10.3368	20.2734	16.0475	11.7668	2.11923	0	1.08235
PKN2	2650.92	2720.33	2841.4	2758.34	2359.76	2382.17	2310.83
GTF2B	594.836	610.967	594.759	732.485	464.111	459.979	492.471
KYAT3	655.917	643.22	594.759	722.679	611.398	620.575	618.025
RBMXL1	583.559	636.77	643.905	771.708	440.8	430.239	375.577
GBP3	0	0.921519	0	0	185.433	197.275	151.53
GBP1	2.81913	0.921519	5.01483	0	1526.91	1333.34	1033.65
GBP2	17.8545	11.0582	3.0089	6.86398	583.848	387.611	199.153
GBP7	0	0	0	2.94171	0	0	0
GBP4	0	0	0	0	310.467	219.085	164.518
GBP5	0	0.921519	0	0	6.35769	4.95667	3.24706
GBP6	2.81913	1.84304	3.0089	1.96114	374.044	401.49	245.695
GBP1P1	27.2516	25.8025	31.092	37.2616	24.3711	20.818	20.5647
LRRC8B	690.686	729.843	769.275	803.086	865.706	814.876	767.39
LRRC8C-DT	24.4324	34.0962	21.0623	21.5725	21.1923	20.818	19.4824
LRRC8C	451.06	394.41	403.193	403.014	423.846	564.069	802.025
LRRC8D	477.372	424.82	446.32	422.625	887.957	790.093	785.79
ZNF326	1987.48	2076.18	2308.83	2011.15	1461.21	1528.64	1390.83
BARHL2	131.559	137.306	113.335	94.1346	0	0	0
LINC02609	155.052	150.208	137.406	135.319	0	0.991333	2.16471
ZNF644	1917.95	2063.28	1865.52	1808.17	1631.81	1570.27	1558.59
HFM1	66.7194	74.6431	114.338	101.979	0	0	1.08235
CDC7	2166.97	2343.42	2774.21	2493.59	1074.45	999.264	1065.04
TGFBR3	550.67	592.537	584.729	627.564	68.875	72.3673	76.8472
EPHX4	108.067	69.1139	68.2017	83.3484	146.227	155.639	184
SETSIP	10.3368	14.7443	11.0326	6.86398	1.05962	3.96533	7.57648
KIAA1107	69.5385	78.3291	57.1691	52.9507	118.677	100.125	93.0825
GLMN	737.672	745.509	856.533	802.106	691.929	760.353	734.919
RPAP2	1067.51	1154.66	1171.46	1152.17	813.784	775.223	635.342
GFI1	219.892	266.319	223.662	250.045	15.8942	18.8353	11.9059
EVI5	770.562	749.195	773.287	756.999	570.073	632.471	742.495
RPL5	24901.4	24751.1	25574.6	28380.6	10319.6	11179.3	11848.5
DIPK1A	234.927	243.281	229.679	312.802	483.184	405.455	477.318
SNORA66	16.9148	11.0582	18.0534	6.86398	3.17885	5.948	7.57648
MTF2	2052.32	1864.23	1834.43	1869.95	1046.9	1107.32	899.437
TMED5	3224.14	3268.63	3115.21	3521.22	2776.19	2889.74	2803.3
CCDC18	779.019	832.132	756.237	686.398	519.211	593.809	583.389
CCDC18-AS1	209.555	207.342	164.487	183.366	133.512	135.813	114.73
DR1	2600.18	2655.82	2644.82	2775.99	2017.51	2098.65	2276.19
FNBP1L	881.447	894.795	740.189	796.222	2095.92	2012.41	1822.69
BCAR3	169.148	149.286	100.297	131.396	2136.18	2681.56	3111.77
DNTTIP2	2166.03	2198.75	2347.94	2344.54	1745.19	1820.09	2202.59
GCLM	917.156	977.732	1148.4	1096.28	1731.41	1764.57	2035.91
ABCA4	1.87942	8.29367	0	1.96114	2.11923	0	0
ARHGAP29	753.647	623.869	546.617	684.437	2921.36	3229.76	3356.38
LOC107985092	1.87942	0	0	0	0	0	1.08235
ABCD3	2131.26	2054.99	2160.39	2293.55	1480.28	1501.87	1491.48
F3	61.0811	65.4279	368.089	46.0867	24475	30367.5	41796.2
SLC44A3-AS1	23.4927	17.5089	12.0356	17.6502	97.4846	86.246	75.7648
SLC44A3	50.7443	41.4684	32.0949	38.2422	220.4	199.258	152.612
CNN3	2344.57	2382.13	2390.07	2220.99	2939.37	3132.61	3308.76
LOC729970	58.262	66.3494	56.1661	57.8536	23.3115	36.6793	28.1412
ALG14	206.736	206.42	275.816	268.676	110.2	135.813	158.024
TMEM56	328.898	378.744	245.727	314.763	643.186	639.41	594.213
TMEM56-RWDD3	2.81913	11.0582	17.0504	3.92228	2.11923	10.9047	7.57648
LOC101928118	2.81913	3.68608	3.0089	0.980569	6.35769	1.98267	4.32942
RWDD3	25.3721	44.2329	61.181	28.4365	49.8019	24.7833	27.0589
LINC02607	0	0.921519	0	0	1.05962	0	0
PTBP2	828.824	747.352	765.263	747.194	247.95	205.206	226.212
DPYD	16.9148	14.7443	9.0267	8.82512	276.56	258.738	264.095
DPYD-AS1	0	0	0	0	3.17885	0.991333	2.16471
MIR137HG	0	0	0	0	0	3.96533	3.24706
SNX7	531.875	512.365	616.824	586.38	706.763	686.003	806.354
PLPPR5	6.57796	6.45064	3.0089	1.96114	3.17885	7.93067	20.5647
LOC100129620	2.81913	0	0	0	0	0	0
PLPPR4	35.7089	35.0177	10.0297	19.6114	0	0	0
PALMD	26.3119	22.1165	3.0089	16.6697	132.452	101.116	77.9295
FRRS1	155.052	158.501	159.472	146.105	246.89	282.53	273.836
AGL	1839.01	1921.37	2103.22	1943.49	1573.53	1526.65	1385.41
SLC35A3	533.755	560.284	598.771	554.022	643.186	615.618	602.872
MFSD14A	7.51767	7.37215	11.0326	5.88341	3.17885	3.96533	11.9059
SASS6	947.227	1005.38	950.812	982.53	484.244	548.207	487.06
TRMT13	570.403	729.843	803.376	699.146	500.138	483.771	428.613
LRRC39	22.553	26.7241	47.1394	43.145	5.29808	10.9047	10.8235
DBT	1307.14	1304.87	1189.52	1150.21	844.513	822.807	684.048
RTCA	1130.47	1138.08	1150.4	1255.13	1521.61	1746.73	1762.07
MIR553	0	0.921519	0	0	1.05962	0	0
CDC14A	537.514	423.899	590.747	459.887	148.346	186.371	194.824
GPR88	8.45738	3.68608	1.00297	0.980569	0	0	0
VCAM1	6.57796	0	0	0	0	0	0
EXTL2	374.944	383.352	467.382	419.684	449.277	469.892	479.483
SLC30A7	734.853	690.218	736.177	894.279	1112.6	1160.85	1175.44
DPH5	828.824	778.684	1051.11	1014.89	354.971	414.377	439.436
LOC102606465	171.027	162.187	217.644	151.988	130.333	142.752	121.224
S1PR1	74.237	80.1722	40.1187	47.0673	22.2519	47.584	46.5413
LINC01709	2.81913	1.84304	2.00593	0	1.05962	0.991333	3.24706
OLFM3	5.63826	0.921519	0	0	0	0	0
COL11A1	0.939709	0	0	0.980569	2.11923	2.974	4.32942
LOC101928436	0	0	1.00297	0.980569	1.05962	0	0
RNPC3	404.075	450.623	431.276	456.945	276.56	260.721	291.153
AMY2B	10.3368	9.21519	11.0326	8.82512	16.9538	14.87	10.8235
PRMT6	1159.6	1176.78	1307.87	1338.48	671.796	729.621	672.142
NTNG1	22.553	15.6658	1.00297	9.80569	4.23846	0.991333	9.74119
VAV3	207.676	165.873	116.344	146.105	115.498	50.558	24.8942
SLC25A24	1199.07	1234.84	1256.72	1342.4	3001.89	2868.92	2894.22
FAM102B	685.048	736.294	752.225	738.369	116.558	111.029	128.8
HENMT1	0	0.921519	1.00297	0.980569	495.9	500.623	460.001
PRPF38B	2205.5	2568.27	3096.16	2334.73	1799.23	1726.9	1711.2
FNDC7	8.45738	7.37215	2.00593	5.88341	1.05962	0	1.08235
STXBP3	1343.78	1228.39	1242.68	1321.81	1012.99	1029	970.872
AKNAD1	0	0	0	0	4.23846	3.96533	16.2353
GPSM2	792.175	700.355	697.062	861.92	1436.84	1430.49	1596.47
CLCC1	1526.09	1549.07	1499.43	1487.52	994.979	1132.1	1128.9
WDR47	520.599	537.246	397.175	439.295	556.298	559.112	540.095
TAF13	843.859	775.919	772.284	786.416	1046.9	1247.1	1426.54
TMEM167B	579.801	533.56	545.614	555.002	743.85	898.148	807.437
C1orf194	1.87942	0	0	0.980569	1.05962	0	0
KIAA1324	15.9751	9.21519	6.0178	4.90285	66.7558	57.4973	75.7648
SARS	3396.11	3532.18	3504.37	3912.47	2740.16	2793.58	2948.33
CELSR2	1356	1436.65	1202.56	1261.01	2622.55	2104.6	1446.03
PSRC1	731.094	760.253	729.157	625.603	805.307	870.391	1016.33
MYBPHL	0.939709	0.921519	0	0	0	0	0
SORT1	1632.27	1674.4	1667.93	1622.84	2715.79	2718.24	2426.64
PSMA5	2463.92	2370.15	2617.74	2714.22	2561.09	2581.43	2662.59
SYPL2	179.484	232.223	176.522	190.23	0	0	2.16471
ATXN7L2	226.47	324.375	259.768	229.453	276.56	242.877	256.518
CYB561D1	297.888	250.653	277.822	270.637	359.21	326.149	325.789
AMIGO1	222.711	211.949	228.676	227.492	153.644	136.804	130.965
GPR61	0.939709	0	0	0.980569	0	0.991333	1.08235
GNAI3	2288.19	2293.66	2373.02	2623.02	3009.31	3186.15	3386.69
GNAT2	3.75884	11.9798	6.0178	11.7668	2.11923	6.93933	7.57648
AMPD2	1320.29	1422.83	1665.93	1415.94	1157.1	1035.94	1289.08
GSTM4	62.0208	78.3291	60.178	95.1152	97.4846	69.3933	60.6119
GSTM2	103.368	102.289	113.335	102.96	6.35769	3.96533	1.08235
GSTM1	1.87942	0	0	0	0	0	0
GSTM3	1025.22	862.542	911.697	960.958	701.465	677.081	815.013
EPS8L3	0	0	0	0	2.11923	1.98267	0
CSF1	89.2724	92.1519	69.2047	98.0569	712.061	440.152	242.447
AHCYL1	2410.35	2570.12	2510.43	2465.15	3379.11	3267.44	2960.24
STRIP1	1126.71	1204.43	1081.2	1073.72	747.029	755.396	764.143
ALX3	11.2765	13.8228	10.0297	7.84455	0	1.98267	2.16471
LINC01397	11.2765	10.1367	15.0445	13.728	0	0	0
UBL4B	5.63826	0	2.00593	7.84455	0	0	0
SLC6A17	74.237	77.4076	55.1632	46.0867	158.942	185.379	141.788
LINC02586	9.39709	1.84304	8.02373	5.88341	1.05962	0.991333	0
KCNC4	270.636	340.962	363.074	269.656	277.619	223.05	227.295
RBM15-AS1	41.3472	36.8608	38.1127	38.2422	23.3115	13.8787	12.9883
RBM15	1020.52	1027.49	848.51	910.949	518.152	563.077	535.766
LAMTOR5-AS1	174.786	123.484	119.353	128.455	79.4711	80.298	68.1884
SLC16A4	36.6487	46.076	23.0682	16.6697	518.152	439.161	292.236
LAMTOR5	924.674	982.34	1108.28	1156.09	1106.24	1114.26	1066.12
PROK1	1.87942	7.37215	2.00593	1.96114	0	0	0
KCNA2	63.9002	44.2329	2.00593	15.6891	0	0	0
KCNA3	11.2765	10.1367	11.0326	4.90285	0	0	0
CD53	0.939709	0.921519	0	0.980569	0	0	0
LRIF1	472.674	518.815	418.237	452.042	904.911	922.931	843.154
DRAM2	483.011	428.506	540.599	594.225	560.536	539.285	479.483
CEPT1	841.04	885.58	928.747	841.328	742.79	771.257	702.448
DENND2D	0	0	9.0267	0	812.725	746.474	712.189
CHI3L2	0	0.921519	0	0	0	1.98267	5.41177
PIFO	7.51767	7.37215	13.0386	2.94171	5.29808	0	7.57648
PGCP1	0.939709	0	1.00297	0	0	0	0
OVGP1	61.0811	75.5646	59.175	56.873	15.8942	3.96533	8.65884
WDR77	2099.31	2244.82	2947.72	2446.52	1218.56	1243.13	1389.74
ATP5PB	5226.66	5202.9	6120.1	6026.58	3655.67	3837.45	4251.49
C1orf162	7.51767	13.8228	19.0564	7.84455	3.17885	7.93067	9.74119
RAP1A	1318.41	1277.23	1329.93	1368.87	1435.78	1498.9	1604.05
LINC01160	5.63826	1.84304	4.01187	0.980569	5.29808	0	2.16471
INKA2	152.233	149.286	79.2344	119.629	141.988	146.717	115.812
INKA2-AS1	31.0104	13.8228	6.0178	12.7474	2.11923	4.95667	1.08235
LOC101928718	3.75884	0.921519	7.02077	0.980569	7.41731	3.96533	6.49413
DDX20	1199.07	1267.09	1308.87	1442.42	655.902	662.211	677.554
KCND3	46.0458	29.4886	7.02077	19.6114	0	0	0
LINC01750	1.87942	1.84304	0	0.980569	0	0	0
CTTNBP2NL	584.499	553.833	487.442	494.207	1117.89	1171.76	1007.67
WNT2B	68.5988	73.7215	49.1454	52.9507	26.4904	17.844	22.7295
ST7L	433.206	441.408	380.124	405.956	257.486	344.984	351.765
CAPZA1	4029.47	3980.96	4065.02	4425.31	4993.97	5006.23	5694.27
MOV10	1038.38	1095.69	1159.43	1127.65	2669.17	2469.41	2062.97
RHOC	423.809	362.157	315.934	337.316	1633.93	1553.42	2001.27
PPM1J	57.3223	40.5469	56.1661	61.7759	20.1327	23.792	25.9765
FAM19A3	2.81913	6.45064	0	1.96114	7.41731	12.8873	3.24706
LINC01356	8.45738	10.1367	3.0089	0	13.775	17.844	22.7295
HP08777	4.69855	6.45064	5.01483	0.980569	59.3384	98.142	110.4
SLC16A1	7378.6	7432.05	7627.56	7400.35	3884.55	4004.99	4535.07
SLC16A1-AS1	505.564	487.484	494.462	523.624	200.267	237.92	225.13
LOC100996251	2.81913	1.84304	8.02373	5.88341	4.23846	0	4.32942
LRIG2	716.058	784.213	753.228	720.718	474.708	403.473	452.424
MAGI3	837.281	770.39	696.059	760.922	528.748	511.528	506.542
PHTF1	590.137	630.319	587.738	547.158	790.473	879.313	920.002
RSBN1	678.47	765.783	664.967	633.448	511.794	442.135	438.354
PTPN22	2.81913	0.921519	0	1.96114	0	0.991333	1.08235
AP4B1-AS1	7.51767	6.45064	12.0356	11.7668	4.23846	4.95667	4.32942
BCL2L15	6.57796	6.45064	11.0326	4.90285	6.35769	2.974	9.74119
AP4B1	365.547	352.942	519.537	410.858	449.277	489.719	579.06
DCLRE1B	735.792	699.433	785.323	768.766	567.954	627.514	658.072
HIPK1-AS1	5.63826	8.29367	4.01187	6.86398	4.23846	4.95667	0
HIPK1	1854.05	2047.62	1851.48	1987.61	1938.04	1983.66	1759.91
OLFML3	12.2162	8.29367	0	2.94171	32.8481	36.6793	32.4706
SYT6	52.6237	36.8608	4.01187	18.6308	0	0	0
TRIM33	2183.88	2292.74	2097.2	2150.39	1559.75	1579.19	1434.12
BCAS2	1762.89	1696.52	1730.12	1704.23	1373.26	1313.52	1475.25
DENND2C	225.53	196.284	178.528	228.473	537.225	578.939	641.836
AMPD1	2.81913	3.68608	1.00297	1.96114	0	0	0
NRAS	2656.56	2698.21	3155.33	3307.46	3633.42	3860.25	4153
CSDE1	16214.7	16143.2	17129.7	17633.6	12703.7	13371.1	14417
SIKE1	2285.37	2364.62	2422.16	2329.83	1693.26	1753.67	1595.39
SYCP1	0.939709	0	0	0	0	0	1.08235
TSPAN2	86.4532	92.1519	78.2314	89.2318	54.0404	60.4713	46.5413
NGF	10.3368	10.1367	4.01187	5.88341	14.8346	22.8007	32.4706
VANGL1	779.959	727.079	793.347	849.173	2049.3	1950.94	1942.83
CASQ2	0	0.921519	1.00297	2.94171	0	0.991333	0
NHLH2	41.3472	61.7418	27.0801	40.2033	13.775	5.948	11.9059
LINC01649	0.939709	0	0	0	0	1.98267	0
SLC22A15	97.7298	90.3089	111.329	77.465	185.433	220.076	254.353
MAB21L3	6.57796	1.84304	1.00297	4.90285	7.41731	5.948	4.32942
ATP1A1	12942.6	13071.8	14343.4	13482.8	11041.2	10693.5	11824.7
ATP1A1-AS1	330.778	262.633	350.035	283.384	244.771	275.591	270.589
LINC01762	2.81913	0	1.00297	1.96114	1.05962	0	1.08235
CD58	118.403	140.992	138.409	151.008	332.719	339.036	352.848
IGSF3	909.639	892.031	710.1	908.988	1229.15	1285.76	994.684
PTGFRN	1406.74	1455.08	1393.12	1381.62	3684.28	3610.44	3819.63
CD101	63.9002	58.0557	86.2551	72.5621	22.2519	30.7313	27.0589
LOC101929099	15.0353	19.3519	21.0623	18.6308	36.0269	29.74	12.9883
TTF2	2452.64	2485.34	2580.63	2699.51	1076.57	1161.84	1112.66
TRIM45	187.942	172.324	160.475	134.338	224.638	194.301	180.753
VTCN1	2.81913	0	1.00297	0	48.7423	24.7833	3.24706
MAN1A2	1583.41	1745.36	1477.37	1546.36	1766.38	1665.44	1740.43
TENT5C	212.374	228.537	143.424	132.377	18.0135	14.87	18.4
GDAP2	362.728	336.355	432.279	408.897	517.092	526.398	567.154
WDR3	3298.38	3193.06	3688.91	3646.74	1698.56	1830	1832.43
SPAG17	29.131	27.6456	24.0712	30.3976	11.6558	11.896	18.4
TBX15	4.69855	6.45064	5.01483	8.82512	3.17885	0	1.08235
WARS2	519.659	560.284	679.008	605.992	264.904	268.651	310.636
WARS2-AS1	670.952	700.355	686.029	616.778	379.342	457.996	435.107
LINC01780	4.69855	4.6076	4.01187	7.84455	0	0	0
HAO2	4.69855	0.921519	5.01483	1.96114	0	0	0
LINC00622	6.57796	3.68608	10.0297	8.82512	1.05962	0.991333	3.24706
ZNF697	390.919	419.291	400.184	391.247	398.415	497.649	530.354
PHGDH	5603.49	5738.3	5198.38	7045.39	1029.95	1049.82	945.978
HMGCS2	0.939709	0.921519	0	0	0	0	0
REG4	1.87942	0	0	1.96114	0	0	0
NBPF7	0	1.84304	0	0	0	0	0
NOTCH2	3490.08	3281.53	3444.19	3455.53	2539.9	2656.77	2412.57
SEC22B	1544.88	1634.78	1595.72	1584.6	1632.87	1868.66	1753.41
NBPF8	467.975	444.172	504.492	447.14	430.204	464.935	469.742
PFN1P2	0	0	2.00593	0	1.05962	1.98267	1.08235
LOC100996724	156.931	123.484	150.445	108.843	100.663	108.055	98.4943
NBPF26	145.655	118.876	144.427	133.357	321.063	393.559	264.095
LOC100996720	3.75884	0.921519	2.00593	0.980569	16.9538	12.8873	19.4824
RNVU1-4	1.87942	0.921519	2.00593	3.92228	0	0	0
FAM72B	498.986	475.504	522.546	540.294	400.535	403.473	465.413
SRGAP2C	340.175	316.081	248.736	340.257	390.998	403.473	395.06
LOC107985194	1.87942	3.68608	10.0297	8.82512	2.11923	0.991333	0
EMBP1	23.4927	18.4304	16.0475	27.4559	37.0865	61.4627	66.0236
FAM72C	71.4179	73.7215	79.2344	82.3678	86.8884	125.899	128.8
LOC100996732	73.2973	70.0355	65.1928	54.9119	44.5038	38.662	41.1295
RNVU1-15	5.63826	5.52912	2.00593	4.90285	0	0	0
NBPF15	859.834	838.583	925.738	816.814	593.384	543.251	540.095
SRGAP2B	190.761	205.499	144.427	141.202	169.538	214.128	171.012
FAM72D	157.871	168.638	186.552	200.036	152.585	158.613	155.859
LINC01145	81.7547	84.7798	55.1632	48.0479	93.2461	101.116	119.059
NBPF20	160.69	161.266	175.519	165.716	42.3846	52.5407	71.4354
NBPF25P	18.7942	22.1165	18.0534	24.5142	22.2519	15.8613	34.6354
GPR89B	270.636	237.752	249.739	201.997	257.486	240.894	287.906
PDZK1	11.2765	2.76456	6.0178	1.96114	51.9211	34.6967	36.8001
CD160	0.939709	0	1.00297	1.96114	2.11923	2.974	4.32942
RNF115	768.682	823.838	931.756	818.775	1110.48	959.611	1003.34
POLR3C	898.362	907.697	1030.05	970.763	702.525	685.011	792.284
NUDT17	66.7194	79.2507	92.2729	54.9119	52.9808	87.2373	42.2118
PIAS3	819.426	823.838	878.599	879.57	1278.96	1145.98	1128.9
ANKRD35	0.939709	2.76456	0	0	12.7154	6.93933	1.08235
ITGA10	17.8545	17.5089	16.0475	18.6308	21.1923	13.8787	10.8235
PEX11B	173.846	198.127	189.561	201.997	155.763	143.743	153.694
RBM8A	5044.36	5281.23	5194.36	5349	3070.76	3171.28	3484.1
GNRHR2	38.5281	34.0962	26.0771	45.1062	20.1327	18.8353	19.4824
LIX1L-AS1	102.428	97.681	113.335	95.1152	37.0865	51.5493	66.0236
LIX1L	1455.61	1536.17	1578.67	1471.83	50.8615	44.61	56.2825
ANKRD34A	105.247	104.132	84.2492	85.3095	10.5962	6.93933	8.65884
POLR3GL	148.474	144.679	137.406	175.522	58.2788	64.4367	47.6236
TXNIP	576.042	536.324	402.19	479.498	3038.98	2986.89	2944.01
HJV	0.939709	0	0	0.980569	0	0	0
LINC01719	172.906	146.522	134.398	108.843	26.4904	12.8873	12.9883
NBPF10	116.524	130.856	111.329	122.571	83.7096	88.2287	86.5884
NOTCH2NLA	8.45738	3.68608	11.0326	5.88341	1.05962	0	0
NBPF12	429.447	410.998	407.204	373.597	241.592	274.599	244.612
PRKAB2	1075.97	1186	1056.12	1167.86	910.209	1034.95	1132.14
PDIA3P1	31.0104	32.2532	24.0712	25.4948	73.1134	106.073	103.906
FMO5	49.8046	51.6051	40.1187	31.3782	13.775	10.9047	8.65884
CHD1L	17.8545	26.7241	27.0801	18.6308	15.8942	14.87	17.3177
LINC00624	25.3721	18.4304	10.0297	10.7863	0	6.93933	2.16471
BCL9	933.131	862.542	969.869	1013.91	438.681	405.455	362.589
ACP6	676.591	599.909	702.077	652.078	526.629	498.641	461.083
GJA5	8.45738	2.76456	6.0178	8.82512	0	0	0
GJA8	2.81913	6.45064	0	0.980569	0	0	0
PDZK1P1	0	0	1.00297	1.96114	5.29808	0	2.16471
RNVU1-7	0	0.921519	0	1.96114	1.05962	0	0
NBPF11	389.04	407.312	394.166	347.121	228.877	201.241	176.424
LOC100505824	5.63826	0.921519	0	1.96114	0	0	0
LOC101927468	2.81913	0.921519	0	0.980569	0	0	0
LINC01138	84.5738	81.0937	65.1928	61.7759	34.9673	34.6967	41.1295
MIR5087	0	0	0	0.980569	2.11923	0	0
RNVU1-1	4.69855	0.921519	0	0	0	0	0
RNVU1-3	0.939709	1.84304	0	0.980569	0	0.991333	0
NBPF14	225.53	199.048	244.724	210.822	171.658	176.457	138.541
PDE4DIP	1295.86	1225.62	1070.17	1113.93	948.356	980.429	1050.97
NBPF9	550.67	646.907	614.818	531.468	480.006	584.887	678.636
LOC653513	4.69855	11.0582	2.00593	0	8.47692	9.91333	17.3177
NOTCH2NLC	2.81913	4.6076	7.02077	0.980569	0	0	0
PPIAL4C	0	1.84304	0	0	0	0	0
LINC00869	67.6591	74.6431	62.1839	83.3484	27.55	31.7227	28.1412
LOC102723955	1.87942	0	1.00297	0	0	0.991333	0
HIST2H2BF	51.684	57.1342	11.0326	27.4559	19.0731	11.896	20.5647
HIST2H3D	5.63826	0.921519	1.00297	1.96114	4.23846	3.96533	2.16471
HIST2H4A	17.8545	21.1949	4.01187	8.82512	13.775	5.948	10.8235
HIST2H2AA3	1.87942	1.84304	0	0.980569	0	0	0
HIST2H2BC	213.314	220.243	119.353	146.105	74.1731	69.3933	60.6119
HIST2H4B	0.939709	0.921519	0	0.980569	0	0	0
HIST2H2BE	192.64	179.696	23.0682	72.5621	41.325	32.714	40.0471
HIST2H2AC	15.9751	14.7443	7.02077	6.86398	12.7154	21.8093	17.3177
HIST2H2AB	2.81913	0.921519	1.00297	0.980569	0	0	2.16471
BOLA1	247.144	246.967	233.691	232.395	198.148	168.527	184
SV2A	158.811	93.0735	72.2136	92.1735	164.24	142.752	137.459
SF3B4	1932.04	1934.27	2122.28	2024.88	1520.55	1639.67	1626.78
MTMR11	38.5281	52.5266	20.0593	35.3005	203.446	212.145	220.8
OTUD7B	973.539	1020.12	885.619	919.774	975.906	951.68	994.684
VPS45	851.377	827.524	825.441	821.717	773.519	726.647	790.119
PLEKHO1	631.485	595.301	617.827	571.672	110.2	124.908	80.0943
ANP32E	5926.75	5951.17	6039.86	6292.31	4605.09	4363.85	4391.11
CA14	7.51767	3.68608	1.00297	3.92228	4.23846	7.93067	10.8235
APH1A	3097.28	3205.04	3306.78	3436.89	3250.9	3633.24	3649.7
C1orf54	90.2121	74.6431	80.2373	80.4067	70.9942	70.3847	86.5884
CIART	10.3368	4.6076	3.0089	7.84455	83.7096	101.116	115.812
MRPS21	1879.42	1890.96	2056.08	1971.92	1077.63	1139.04	1107.25
PRPF3	1350.36	1484.57	1555.6	1287.49	1088.22	1081.54	1118.07
RPRD2	1538.3	1582.25	1529.52	1492.43	1159.22	1020.08	1081.27
TARS2	1969.63	1974.82	2016.97	2105.28	834.977	787.119	818.26
ECM1	28.1913	23.9595	53.1572	24.5142	283.977	338.045	342.024
FALEC	17.8545	17.5089	13.0386	12.7474	3.17885	2.974	2.16471
ADAMTSL4	25.3721	32.2532	27.0801	32.3588	264.904	185.379	119.059
ADAMTSL4-AS1	1.87942	1.84304	3.0089	5.88341	3.17885	4.95667	8.65884
MCL1	4040.75	4210.42	4450.16	4349.8	7173.59	7740.33	8178.27
ENSA	5533.01	5344.81	5972.67	5925.58	3008.25	3087.01	3323.91
GOLPH3L	872.99	872.679	854.527	891.337	636.829	670.141	629.931
HORMAD1	0.939709	1.84304	116.344	5.88341	0	0	0
CTSS	4.69855	6.45064	5.01483	0.980569	169.538	113.012	155.859
CTSK	35.7089	32.2532	25.0742	35.3005	65.6961	51.5493	56.2825
ARNT	1360.7	1206.27	1203.56	1214.93	724.777	687.985	651.578
SETDB1	1122.95	1144.53	1165.45	1132.56	683.452	603.722	590.966
CERS2	3551.16	3628.94	3574.57	3360.41	3200.04	3747.24	4263.4
ANXA9	24.4324	7.37215	4.01187	8.82512	125.035	78.3153	34.6354
MINDY1	312.923	314.238	264.783	296.132	312.586	286.495	242.447
PRUNE1	861.713	970.36	773.287	771.708	532.986	466.918	429.695
BNIPL	43.2266	28.5671	43.1276	23.5337	26.4904	13.8787	7.57648
C1orf56	105.247	115.19	115.341	126.493	65.6961	75.3413	62.7766
CDC42SE1	1582.47	1608.97	1586.69	1523.8	3509.45	3595.57	3997.14
MLLT11	394.678	388.881	177.525	320.646	1184.65	1250.07	1221.98
GABPB2	347.692	347.413	372.101	327.51	341.196	337.053	347.436
SEMA6C	384.341	310.552	261.774	314.763	27.55	30.7313	32.4706
SCNM1	721.697	749.195	601.78	755.038	435.502	482.779	480.566
LYSMD1	288.491	342.805	306.908	353.985	175.896	201.241	154.777
TMOD4	15.0353	15.6658	25.0742	19.6114	29.6692	9.91333	10.8235
VPS72	1363.52	1400.71	1409.17	1412.02	678.154	686.003	635.342
PIP5K1A	4090.55	3834.44	3571.56	3565.35	3099.37	3250.58	3702.74
PSMD4	3814.28	3667.65	3727.02	3765.39	2993.41	2960.12	2981.89
ZNF687-AS1	45.106	40.5469	36.1068	46.0867	14.8346	12.8873	19.4824
ZNF687	1129.53	1173.09	945.797	1028.62	752.327	748.457	688.378
PI4KB	2392.5	2312.09	2322.87	2276.88	1770.62	1662.47	1934.17
RFX5	1621.94	1602.52	1903.63	1682.66	1666.77	1383.9	1215.48
SELENBP1	352.391	352.02	131.389	238.278	0	0	0
PSMB4	4400.66	4229.77	4604.62	4811.65	4460.98	4679.09	4802.41
POGZ	2152.87	2196.9	2295.79	1799.34	1287.43	1202.49	1276.1
CGN	646.52	570.42	534.581	533.43	2391.55	2447.6	1995.86
TUFT1	470.794	435.879	343.015	399.092	2129.83	2219.6	2372.52
MIR554	0.939709	0	0	0	1.05962	0	0
SNX27	1500.72	1424.67	1534.54	1245.32	917.627	856.512	791.201
CELF3	8.45738	11.9798	3.0089	12.7474	0	0	0
RIIAD1	0	1.84304	0	0.980569	0	0	0
MRPL9	1159.6	1170.33	1359.02	1254.15	972.727	1018.1	1058.54
OAZ3	79.8753	86.6228	84.2492	90.2124	65.6961	72.3673	80.0943
TDRKH	505.564	457.074	404.196	426.548	263.844	257.747	276
TDRKH-AS1	48.8649	33.1747	26.0771	25.4948	24.3711	23.792	7.57648
C2CD4D	0	0	2.00593	0	19.0731	14.87	21.6471
THEM5	0	0	0	0	9.53654	6.93933	1.08235
THEM4	579.801	534.481	651.928	701.107	351.792	348.949	362.589
S100A10	1232.9	1367.53	1562.62	1310.04	7424.72	7570.81	7308.06
S100A11	599.534	510.522	728.154	504.013	10256	10109.6	10682.8
TCHHL1	0	0	1.00297	0	6.35769	3.96533	2.16471
TCHH	30.0707	36.8608	10.0297	10.7863	132.452	114.995	88.7531
RPTN	0	0	2.00593	0	7.41731	0.991333	0
FLG-AS1	0.939709	0	2.00593	0	241.592	220.076	182.918
HRNR	0	0	0	0	4.23846	0	1.08235
FLG	1.87942	0	0	1.96114	25.4308	12.8873	18.4
CRCT1	0	0	0	0	5.29808	8.922	21.6471
LCE3E	0	0	2.00593	0	3.17885	0	15.153
LCE3D	0	0	2.00593	0	1.05962	0	5.41177
C1orf68	0	0	0	0	2.11923	0	1.08235
IVL	0	0	17.0504	0	1314.98	1111.28	1442.78
SPRR1A	0	0	1.00297	0	1.05962	0	0
SPRR3	0	0	7.02077	0	0	0	4.32942
SPRR1B	0	0	26.0771	0	9.53654	22.8007	59.5295
SPRR2D	0.939709	0	0	0	68.875	58.4887	49.7883
SPRR2A	0	0	0	0	16.9538	15.8613	20.5647
SPRR2E	0	0	0	0	5.29808	3.96533	3.24706
SPRR2F	2.81913	0.921519	5.01483	3.92228	1.05962	0.991333	3.24706
LOC101928009	0	0	0	0	1.05962	0	2.16471
PRR9	1.87942	0.921519	0	0	1.05962	3.96533	0
PGLYRP3	0	0	0	0	1.05962	0.991333	0
PGLYRP4	0	0	2.00593	0	32.8481	12.8873	9.74119
S100A9	0	0	33.0979	0	3175.67	1657.51	967.625
S100A8	0	0	9.0267	0	60.3981	29.74	15.153
S100A7A	0	0	0	0	10.5962	4.95667	0
S100A7	1.87942	0	0	0	55.1	20.818	3.24706
S100A6	0	0	94.2789	0	5470.79	5367.08	5469.14
S100A4	19.7339	11.9798	21.0623	9.80569	95.3654	83.272	109.318
S100A3	0	0.921519	0	0	170.598	163.57	234.871
S100A2	6.57796	0.921519	434.285	3.92228	22263.6	24961.8	41113.2
S100A16	4.69855	1.84304	61.181	0	4860.45	5136.1	5357.66
S100A14	2.81913	0	55.1632	0.980569	6289.88	6291	5764.62
S100A13	41.3472	55.2912	53.1572	44.1256	105.962	85.2547	99.5766
S100A1	2.81913	7.37215	7.02077	8.82512	7.41731	7.93067	8.65884
CHTOP	3145.21	3038.25	3581.59	3439.84	1615.91	1768.54	1781.56
SNAPIN	669.073	578.714	678.005	669.729	551	567.043	579.06
ILF2	7811.8	7931.52	8629.52	8725.1	4888	5061.75	5514.6
NPR1	2.81913	23.038	1.00297	9.80569	1.05962	2.974	2.16471
INTS3	2556.95	2642	2914.62	2406.32	1921.08	1592.08	1615.96
SLC27A3	187.942	228.537	212.629	234.356	130.333	152.665	109.318
GATAD2B	1551.46	1456.92	1478.37	1293.37	706.763	696.907	705.695
LOC101928059	30.0707	30.4101	28.0831	21.5725	9.53654	22.8007	9.74119
DENND4B	1562.74	1561.98	1805.34	1571.85	1362.67	1273.86	1304.24
CRTC2	1093.82	1051.45	977.892	939.385	779.877	727.639	768.472
SLC39A1	38.5281	32.2532	23.0682	34.3199	33.9077	28.7487	31.3883
CREB3L4	170.087	144.679	134.398	172.58	191.79	139.778	112.565
JTB	83.6341	90.3089	90.267	84.3289	36.0269	44.61	32.4706
RAB13	174.786	157.58	119.353	142.183	170.598	186.371	174.259
RPS27	9015.57	9421.61	8897.32	9790.98	5571.46	5323.46	7115.4
NUP210L	0.939709	1.84304	2.00593	1.96114	1.05962	0	0
TPM3	6409.76	6479.2	6681.76	6634.53	9378.65	10611.2	12438.4
C1orf189	10.3368	3.68608	1.00297	0	2.11923	0	1.08235
C1orf43	4026.65	4286.91	4296.71	4448.84	3521.1	3658.02	3603.16
UBAP2L	5580.93	5574.27	5975.67	4952.85	4720.59	4461.99	4273.14
SNORA58B	2.81913	0	0	0	0	0	0
HAX1	1823.04	1892.8	2017.97	2115.09	1480.28	1482.04	1518.54
AQP10	0	0	5.01483	0	3.17885	5.948	6.49413
ATP8B2	2040.11	2182.16	2106.23	2108.22	295.633	280.547	282.495
IL6R-AS1	0	0.921519	0	0	1.05962	0	0
IL6R	176.665	140.992	118.35	148.066	236.294	220.076	362.589
SHE	2.81913	0.921519	0	0	11.6558	8.922	8.65884
TDRD10	0.939709	0	0	0	1.05962	0	0
UBE2Q1	2096.49	2031.03	1929.71	1947.41	1653	1653.54	1820.52
UBE2Q1-AS1	25.3721	33.1747	25.0742	39.2228	25.4308	13.8787	15.153
CHRNB2	9.39709	3.68608	7.02077	0	6.35769	7.93067	2.16471
ADAR	6865.52	7040.41	6907.43	6688.46	7972.54	8035.75	7197.66
KCNN3	32.8898	18.4304	6.0178	14.7085	0	0	1.08235
PMVK	628.665	572.264	655.94	623.642	663.319	790.093	780.378
PBXIP1	475.493	392.567	320.949	284.365	680.273	610.661	371.248
PYGO2	1353.18	1423.75	1409.17	1319.85	1106.24	1179.69	1115.91
LOC101928120	45.106	43.3114	35.1038	31.3782	23.3115	28.7487	22.7295
SHC1	726.395	840.426	695.056	690.321	4250.12	4200.28	4659.54
CKS1B	1815.52	1909.39	1867.52	2123.91	1394.45	1461.23	1403.81
MIR4258	7.51767	3.68608	4.01187	3.92228	5.29808	1.98267	0
FLAD1	1130.47	1090.16	1150.4	1141.38	663.319	693.933	784.707
LENEP	0.939709	0.921519	1.00297	0	0	0	0
ZBTB7B	596.715	554.755	478.415	458.906	1133.79	1103.35	1013.08
DCST2	8.45738	11.0582	9.0267	11.7668	8.47692	1.98267	1.08235
DCST1	2.81913	0	2.00593	3.92228	3.17885	1.98267	0
ADAM15	1430.24	1522.35	1668.94	1495.37	2705.2	2755.91	2860.66
EFNA4	79.8753	97.681	80.2373	77.465	167.419	132.839	116.894
EFNA3	117.464	113.347	81.2403	117.668	27.55	18.8353	10.8235
EFNA1	190.761	180.618	155.46	158.852	1130.61	900.131	728.425
SLC50A1	607.992	742.745	644.907	760.922	787.294	743.5	734.919
DPM3	285.672	284.749	280.831	302.996	164.24	155.639	123.388
KRTCAP2	127.8	134.542	173.513	125.513	139.869	104.09	103.906
TRIM46	91.1518	71.8785	55.1632	43.145	144.108	127.882	92.0002
MUC1	13.1559	15.6658	17.0504	11.7668	64.6365	56.506	20.5647
THBS3	187.942	193.519	185.549	161.794	130.333	121.934	75.7648
MTX1	493.347	581.479	562.664	531.468	301.99	333.088	281.412
GBAP1	84.5738	101.367	76.2255	57.8536	141.988	132.839	61.6942
GBA	817.547	819.231	681.014	727.582	1064.91	1152.92	1176.52
FAM189B	3171.52	3281.53	2804.29	2891.7	767.161	763.327	736.001
SCAMP3	1571.19	1607.13	1716.08	1800.32	1230.21	1148.96	1303.16
CLK2	1680.2	1867.92	1857.49	1658.14	878.421	828.755	799.86
HCN3	276.275	354.785	284.842	286.326	135.631	73.3587	109.318
PKLR	2.81913	4.6076	3.0089	0.980569	0	0.991333	1.08235
FDPS	2700.72	2781.15	2878.51	2836.79	2148.9	2178.95	2128.99
RUSC1-AS1	166.329	127.17	145.43	108.843	96.425	76.3327	106.071
RUSC1	1167.12	1226.54	1213.59	1182.57	1309.68	1309.55	1300.99
ASH1L	1963.99	1915.84	1653.89	1492.43	1591.54	1505.84	1381.08
ASH1L-AS1	115.584	71.8785	63.1869	72.5621	16.9538	29.74	14.0706
MSTO1	569.464	587.008	671.988	641.292	406.892	445.109	451.342
YY1AP1	1045.9	985.104	958.836	928.599	784.115	931.853	900.519
DAP3	2386.86	2454.93	2439.21	2519.08	2023.86	2159.12	2293.51
MSTO2P	124.981	175.089	229.679	178.464	101.723	119.951	103.906
GON4L	1370.1	1362.01	1114.3	1089.41	1276.84	1219.34	1086.68
SYT11	131.559	145.6	22.0653	73.5427	42.3846	45.6013	33.553
RIT1	438.844	428.506	344.018	410.858	795.771	773.24	800.943
KHDC4	2486.47	2468.75	2232.6	1852.3	1293.79	1176.71	1088.85
SNORA80E	5.63826	9.21519	7.02077	6.86398	4.23846	3.96533	5.41177
RXFP4	1.87942	0	0	0	4.23846	0	1.08235
ARHGEF2	1370.1	1347.26	928.747	1012.93	951.534	902.113	1033.65
LOC107985209	15.9751	18.4304	9.0267	7.84455	5.29808	6.93933	4.32942
SSR2	2768.38	2945.18	2864.47	3038.78	2444.53	2442.65	2852.01
UBQLN4	2161.33	2309.33	2512.43	2534.77	1126.37	1118.22	1044.47
LAMTOR2	851.377	868.071	983.91	992.336	461.992	414.377	410.212
RAB25	4.69855	5.52912	5.01483	0.980569	976.965	1010.17	894.025
MEX3A	1332.51	1456.92	1313.89	1349.26	316.825	268.651	211.059
LMNA	1209.41	1229.31	872.581	1011.95	6210.4	6542.8	7331.87
SEMA4A	24.4324	28.5671	30.089	37.2616	288.215	216.111	218.636
SLC25A44	984.815	953.773	842.492	809.95	878.421	961.593	1061.79
PMF1	218.013	210.106	304.902	289.268	190.731	173.483	233.789
BGLAP	1.87942	3.68608	1.00297	0.980569	0	0	1.08235
PAQR6	249.963	223.008	196.581	233.375	36.0269	16.8527	23.8118
SMG5	4473.96	4359.71	4462.2	4054.65	3707.59	3691.73	3915.96
TMEM79	112.765	108.739	93.2759	89.2318	347.554	345.975	304.142
GLMP	934.071	904.932	1004.97	875.648	715.24	674.107	727.342
CCT3	14300.5	13871.6	15806.8	15327.3	7584.72	8005.02	8638.27
TSACC	34.7692	31.3317	40.1187	25.4948	10.5962	6.93933	10.8235
RHBG	0	1.84304	3.0089	0	0	0.991333	1.08235
C1orf61	100.549	44.2329	62.1839	64.7176	3.17885	7.93067	9.74119
MEF2D	659.676	693.904	517.531	577.555	972.727	1021.07	1054.21
IQGAP3	1517.63	1653.21	1247.69	1236.5	2390.49	2500.14	2241.56
TTC24	0.939709	2.76456	0	1.96114	0	0	0
NAXE	2164.15	1975.74	1849.47	1965.06	1558.69	1659.49	1670.07
GPATCH4	2936.59	2931.35	3617.7	3139.78	1264.12	1395.8	1639.77
HAPLN2	15.9751	16.5873	9.0267	32.3588	0	0	0
BCAN	7.51767	3.68608	5.01483	2.94171	0	0.991333	0
NES	195.46	181.539	59.175	63.737	286.096	223.05	297.648
CRABP2	729.214	630.319	306.908	353.005	4619.92	3525.18	1969.89
ISG20L2	2227.11	2137	2367	2220.99	1579.89	1596.05	1709.04
RRNAD1	383.401	354.785	340.006	374.577	297.752	270.634	240.283
MRPL24	1044.96	1164.8	1192.53	1287.49	702.525	731.604	792.284
HDGF	9468.51	10756	11028.6	11335.4	11817.9	11958.5	12336.7
PRCC	2662.2	2672.41	2410.13	2603.41	1348.89	1437.43	1530.45
SH2D2A	132.499	78.3291	166.492	97.0763	82.65	111.029	172.094
NTRK1	15.9751	8.29367	19.0564	1.96114	2.11923	0	0
INSRR	3.75884	5.52912	4.01187	5.88341	0	0	0
PEAR1	5.63826	9.21519	5.01483	4.90285	125.035	129.865	217.553
LRRC71	1.87942	9.21519	0	1.96114	0	0	1.08235
ARHGEF11	987.634	980.497	965.857	877.609	1037.36	1041.89	1081.27
MIR765	2.81913	0	1.00297	0	3.17885	0	2.16471
ETV3L	0	0	0	2.94171	0	0	0
ETV3	967.9	1019.2	898.658	911.929	738.552	763.327	736.001
LOC107985211	0.939709	0.921519	0	0	0	0	0
FCRL3	4.69855	2.76456	0	0	0	0	0
CD5L	0	0	0	2.94171	3.17885	0	0
KIRREL1	756.466	787.899	728.154	690.321	2756.06	2809.44	2997.04
LINC01704	0	1.84304	0	0.980569	0	3.96533	2.16471
CD1D	32.8898	23.9595	9.0267	20.592	2.11923	4.95667	3.24706
IFI16	68.5988	46.076	108.32	33.3393	3175.67	3039.43	2758.92
AIM2	0	0	1.00297	0	1.05962	1.98267	2.16471
CADM3	7.51767	2.76456	0	0	0	0	0
DUSP23	9.39709	22.1165	17.0504	17.6502	241.592	246.842	317.13
SLAMF8	2.81913	0	0	0	0	0	0
SNHG28	5.63826	0.921519	0	0.980569	3.17885	0.991333	5.41177
VSIG8	0	0	0	0	2.11923	0	0
LOC107985216	1.87942	1.84304	0	0	18.0135	14.87	10.8235
CFAP45	16.9148	14.7443	3.0089	12.7474	27.55	46.5927	55.2001
TAGLN2	6073.34	6106.91	5999.75	6550.2	12946.4	13477.2	15175.7
IGSF9	48.8649	29.4886	58.1721	17.6502	917.627	860.477	837.743
SLAMF9	0	0	1.00297	0	0	2.974	8.65884
LINC01133	0	0	0	0	5.29808	0.991333	1.08235
KCNJ10	11.2765	10.1367	9.0267	2.94171	0	0	0
PIGM	853.256	810.015	731.163	729.543	407.952	425.282	431.86
KCNJ9	0	1.84304	0	0.980569	0	5.948	4.32942
IGSF8	588.258	554.755	498.474	595.205	659.081	667.167	595.295
ATP1A2	0.939709	0	0	0	3.17885	0.991333	1.08235
CASQ1	1.87942	2.76456	0	1.96114	0	0	0
LOC729867	27.2516	35.9393	39.1157	41.1839	93.2461	114.995	84.4237
PEA15	2015.68	1588.7	1711.06	1665.99	6981.8	8037.73	8500.81
DCAF8	637.123	713.256	792.344	716.796	523.45	568.034	514.119
LOC100287049	33.8295	39.6253	22.0653	32.3588	14.8346	27.7573	29.2236
PEX19	1063.75	1023.81	1022.02	1121.77	891.136	966.55	1039.06
COPA	3945.84	3745.05	3684.9	3736.95	3630.24	3883.05	3868.34
NCSTN	1522.33	1400.71	1197.54	1406.14	1673.13	1740.78	1803.2
NHLH1	13.1559	13.8228	13.0386	6.86398	1.05962	0	1.08235
VANGL2	882.387	843.19	696.059	723.66	278.679	221.067	164.518
SLAMF7	5.63826	2.76456	1.00297	0.980569	19.0731	13.8787	27.0589
ITLN1	0	2.76456	0	0	0	0	0
ITLN2	1.87942	0	0	0	0	0	0
F11R	311.044	329.904	257.762	279.462	2550.49	2631.99	2526.22
TSTD1	0.939709	1.84304	3.0089	0	135.631	121.934	92.0002
USF1	878.628	840.426	1105.27	978.608	879.481	827.763	873.46
ARHGAP30	4.69855	5.52912	1.00297	0	29.6692	26.766	27.0589
NECTIN4	8.45738	28.5671	6.0178	6.86398	773.519	786.127	517.366
LOC105371471	0.939709	0	0	0	1.05962	0	0
KLHDC9	0	0	0	0	3.17885	5.948	3.24706
PFDN2	1272.37	1319.62	1517.49	1329.65	1053.26	1131.11	1125.65
NIT1	556.308	545.539	570.688	560.886	489.542	457.996	423.201
DEDD	678.47	744.588	697.062	708.951	762.923	747.465	883.202
UFC1	1242.3	1224.7	1377.07	1299.25	1311.8	1294.68	1400.57
USP21	841.04	904.932	966.86	838.387	739.611	608.679	602.872
PPOX	370.245	437.722	431.276	404.975	148.346	191.327	160.189
B4GALT3	1161.48	1180.47	1256.72	1283.56	861.467	1026.03	1087.77
ADAMTS4	9.39709	13.8228	1.00297	16.6697	3.17885	0.991333	0
NDUFS2	2390.62	2191.37	2776.21	2670.09	1779.09	1789.36	1837.84
FCER1G	0.939709	2.76456	7.02077	1.96114	1.05962	1.98267	1.08235
APOA2	0.939709	0	3.0089	1.96114	0	0	0
TOMM40L	476.433	498.542	533.578	464.79	374.044	486.745	522.777
MIR5187	0	0	1.00297	1.96114	0	0	0
NR1I3	15.9751	12.9013	6.0178	4.90285	8.47692	10.9047	14.0706
PCP4L1	0.939709	0	0	0	5.29808	10.9047	5.41177
MPZ	25.3721	24.881	12.0356	26.4754	26.4904	21.8093	23.8118
SDHC	3610.36	3346.04	3891.51	3857.56	2284.53	2490.23	2426.64
CFAP126	7.51767	2.76456	0	6.86398	2.11923	3.96533	1.08235
FCGR2A	0.939709	0.921519	0	0	0	0	0
HSPA6	7.51767	12.9013	6.0178	10.7863	26.4904	26.766	34.6354
HSPA7	0.939709	0	1.00297	0	3.17885	0.991333	2.16471
FCRLA	0	0	0	0	28.6096	35.688	41.1295
FCRLB	14.0956	10.1367	17.0504	15.6891	26.4904	22.8007	11.9059
DUSP12	401.256	407.312	509.507	484.401	430.204	493.684	493.554
ATF6	1061.87	1070.81	1148.4	1173.74	1262	1360.11	1459.01
OLFML2B	67.6591	63.5848	17.0504	27.4559	14.8346	15.8613	11.9059
NOS1AP	77.0562	99.5241	38.1127	64.7176	39.2058	29.74	35.7177
SPATA46	0.939709	0	0	0	0	0.991333	1.08235
C1orf226	197.339	159.423	105.311	137.28	148.346	119.951	137.459
UHMK1	1990.3	2344.35	2178.44	2215.11	5446.42	5928.17	5820.9
UAP1	1761.95	1679.01	1997.91	1876.81	2644.8	3227.78	4779.68
DDR2	384.341	283.828	122.362	347.121	21.1923	23.792	24.8942
HSD17B7	376.823	422.056	414.225	471.654	244.771	235.937	190.494
CCDC190	0.939709	0	0	0	2.11923	2.974	9.74119
RGS4	21.6133	20.2734	16.0475	15.6891	72.0538	81.2893	159.106
RGS5	56.3826	91.2304	64.1899	72.5621	55.1	28.7487	37.8824
NUF2	1122.01	1071.73	984.913	1103.14	1515.25	1481.05	1766.4
PBX1	1575.89	1466.14	1353	1575.77	1114.72	702.855	594.213
RXRG	95.8503	70.0355	61.181	64.7176	0	0	0
MGST3	1069.39	998.927	978.895	990.375	831.798	869.399	850.731
ALDH9A1	1742.22	1725.08	1722.09	1815.03	1169.82	1202.49	1244.71
LOC440700	1.87942	0	3.0089	0.980569	0	0	0
TMCO1	2573.86	2632.78	2540.51	2897.58	1923.2	2055.03	2476.43
TMCO1-AS1	26.3119	24.881	16.0475	19.6114	12.7154	6.93933	10.8235
UCK2	2168.85	2275.23	2657.86	2702.45	1591.54	1662.47	1728.52
FAM78B	13.1559	10.1367	19.0564	15.6891	2.11923	1.98267	0
FMO9P	0	0.921519	0	0	1.05962	1.98267	1.08235
POGK	1663.29	1881.74	1925.7	1879.75	2129.83	2171.02	2141.98
TADA1	514.961	536.324	665.97	678.554	285.036	302.357	288.989
ILDR2	207.676	232.223	158.469	165.716	5.29808	2.974	6.49413
MAEL	5.63826	0.921519	1.00297	2.94171	0	0	0
GPA33	1.87942	1.84304	0	0	0	0.991333	0
DUSP27	0.939709	2.76456	0	0	0	1.98267	0
POU2F1	1354.12	1531.57	1540.56	1586.56	1171.93	1122.19	958.966
CD247	0.939709	1.84304	3.0089	2.94171	16.9538	36.6793	16.2353
CREG1	1344.72	1290.13	1163.44	1347.3	1449.55	1155.89	1087.77
RCSD1	0	0	0	0	7.41731	4.95667	1.08235
MPZL1	2259.06	2336.97	2609.72	2519.08	2827.05	2810.43	3014.36
ADCY10	4.69855	7.37215	4.01187	5.88341	2.11923	3.96533	1.08235
MPC2	1068.45	1106.74	990.931	1156.09	766.102	794.058	820.425
DCAF6	1411.44	1431.12	1319.9	1359.07	1517.37	1409.68	1251.2
GPR161	498.046	591.615	465.376	521.663	934.581	821.815	742.495
TIPRL	1589.05	1574.88	1770.24	1933.68	1392.33	1415.62	1468.76
SFT2D2	2045.75	1942.56	2093.19	2004.28	2068.37	1903.36	1844.33
ANKRD36BP1	4.69855	4.6076	1.00297	0.980569	0	0.991333	1.08235
TBX19	24.4324	23.038	27.0801	26.4754	23.3115	23.792	24.8942
XCL1	15.0353	27.6456	31.092	25.4948	0	0	0
LINC00626	0.939709	5.52912	1.00297	0.980569	0	0	0
ATP1B1	457.638	418.37	515.525	418.703	2925.6	2539.8	2479.67
NME7	346.753	377.823	400.184	379.48	317.885	295.417	349.601
BLZF1	576.981	565.813	557.649	551.08	1159.22	1337.31	1436.28
CCDC181	245.264	234.066	268.795	235.337	6.35769	5.948	8.65884
SLC19A2	582.62	618.339	622.842	671.69	409.011	449.074	487.06
F5	1.87942	3.68608	0	1.96114	0	2.974	1.08235
C1orf112	609.871	609.124	746.207	640.312	881.6	812.893	860.472
SELL	6.57796	4.6076	6.0178	0.980569	23.3115	25.7747	8.65884
SELE	3.75884	6.45064	0	0.980569	0	0	0
METTL18	137.198	148.365	146.433	153.949	179.075	183.397	173.177
SCYL3	292.25	307.787	287.851	320.646	215.102	205.206	191.577
KIFAP3	610.811	561.205	698.065	695.223	556.298	531.355	579.06
METTL11B	8.45738	6.45064	10.0297	3.92228	0	0	0
GORAB	184.183	154.815	218.647	180.425	178.015	241.885	185.083
PRRX1	136.258	105.975	151.448	110.804	0	0	0
FMO3	2.81913	0	0	0	0	0	0
FMO1	1.87942	0.921519	0	2.94171	0	0	0
FMO4	34.7692	29.4886	34.1009	38.2422	23.3115	25.7747	25.9765
PRRC2C	7150.25	6981.43	6823.18	6473.72	5700.73	5753.7	6023.3
VAMP4	371.185	343.727	364.077	432.431	305.169	316.235	298.73
EEF1AKNMT	1376.67	1345.42	1595.72	1459.09	1112.6	1149.95	1176.52
DNM3	77.9959	82.9367	75.2225	68.6398	82.65	84.2633	100.659
MIR3120	0	0	0	0	0	2.974	0
PIGC	489.588	495.777	522.546	491.265	450.336	430.239	476.236
C1orf105	0	0	1.00297	0	2.11923	0	1.08235
SUCO	1111.68	1165.72	991.934	1159.03	1971.94	1925.17	1882.22
TNFSF18	0	3.68608	0	0	42.3846	24.7833	18.4
TNFSF4	24.4324	11.9798	23.0682	24.5142	15.8942	12.8873	18.4
LOC101928673	17.8545	15.6658	27.0801	34.3199	29.6692	31.7227	30.3059
PRDX6	5815.86	5794.51	7302.6	7051.27	4215.15	4112.05	4053.42
SLC9C2	1.87942	0.921519	1.00297	0	1.05962	0	0
KLHL20	361.788	317.003	320.949	342.219	559.477	593.809	628.848
CENPL	542.212	526.188	459.359	538.332	812.725	831.729	812.848
DARS2	3396.11	3622.49	3954.7	4139.96	1282.13	1322.44	1299.91
GAS5	2814.43	3253.88	3293.74	3068.2	2944.67	2938.31	3142.08
GAS5-AS1	19.7339	9.21519	10.0297	14.7085	16.9538	13.8787	16.2353
ZBTB37	388.1	345.57	326.967	389.286	364.508	323.175	338.777
SERPINC1	0.939709	0	3.0089	0	0	0.991333	1.08235
RC3H1	828.824	830.289	812.403	753.077	801.069	877.33	778.213
LOC105371620	2.81913	0	2.00593	0	0	0.991333	0
LOC102724601	1.87942	4.6076	3.0089	5.88341	13.775	4.95667	10.8235
RABGAP1L	558.187	593.458	594.759	655.02	503.317	474.849	384.236
CACYBP	3850.93	4041.78	4918.55	4611.62	2410.62	2582.42	2977.56
MRPS14	981.996	966.674	1081.2	1037.44	393.117	414.377	400.471
TNN	0.939709	0	0	1.96114	0	0	0
KIAA0040	212.374	199.048	208.617	196.114	532.986	604.713	557.413
TNR	1.87942	0	0	0	0	0	0
COP1	706.661	753.803	815.412	847.212	765.042	716.734	768.472
PAPPA2	7.51767	17.5089	5.01483	3.92228	1.05962	0	3.24706
ASTN1	33.8295	11.9798	3.0089	9.80569	0	0	0
BRINP2	15.0353	7.37215	4.01187	2.94171	0	0	0
CRYZL2P	0	0	0	0.980569	3.17885	0.991333	0
RASAL2-AS1	12.2162	23.9595	10.0297	13.728	57.2192	54.5233	36.8001
RASAL2	778.079	738.137	756.237	688.359	1531.14	1424.55	1727.44
C1orf220	28.1913	25.8025	21.0623	15.6891	5.29808	7.93067	5.41177
RALGPS2	1324.05	1285.52	1660.91	1445.36	1680.55	1659.49	1260.94
ANGPTL1	1.87942	0	0	0.980569	0	0	0
FAM20B	1734.7	1807.1	1925.7	1936.62	2200.82	2252.31	2558.69
TOR3A	1007.37	1170.33	1548.58	1404.17	1255.64	1440.41	1454.68
ABL2	1558.98	1596.99	1604.75	1561.07	2038.7	2395.06	2738.36
SOAT1	1325.93	1268.93	1381.08	1308.08	2128.77	2387.13	2585.75
AXDND1	4.69855	5.52912	7.02077	1.96114	3.17885	2.974	4.32942
TDRD5	9.39709	10.1367	7.02077	6.86398	15.8942	18.8353	6.49413
TOR1AIP2	1966.81	1956.39	1807.35	1881.71	2258.04	2153.18	2147.39
TOR1AIP1	1309.01	1244.05	1190.52	1272.78	1895.65	1968.79	2248.05
CEP350	1914.19	1837.51	1739.14	1611.08	1466.51	1425.54	1265.27
QSOX1	749.888	706.805	916.711	789.358	5662.58	6884.81	7575.4
LHX4	198.279	197.205	206.611	208.861	9.53654	6.93933	3.24706
ACBD6	1145.51	1260.64	1324.92	1201.2	938.819	933.836	875.625
OVAAL	0	1.84304	1.00297	0	0	0	1.08235
XPR1	1543	1412.69	1381.08	1496.35	1542.8	1228.26	1389.74
KIAA1614	26.3119	17.5089	24.0712	10.7863	6.35769	7.93067	9.74119
KIAA1614-AS1	35.7089	30.4101	36.1068	20.592	31.7885	13.8787	18.4
STX6	640.882	751.96	701.074	723.66	1397.63	1373.99	1352.94
MR1	300.707	225.772	144.427	176.502	692.988	640.401	555.248
IER5	1112.62	1232.99	1011.99	1114.91	1929.56	2078.83	1993.7
LINC01732	0	1.84304	0	0	1.05962	0	0
LINC01699	0	0	0	1.96114	0	0	0
CACNA1E	3.75884	2.76456	0	1.96114	0	0	1.08235
ZNF648	6.57796	4.6076	1.00297	0	0	0	0
LINC01344	1.87942	0	0	0	0	0	0
GLUL	8763.73	8702.83	8831.12	8537.82	7498.9	5101.4	3431.06
RNASEL	138.137	177.853	150.445	126.493	359.21	300.374	250.024
RGS16	342.994	343.727	296.878	307.899	247.95	227.015	163.436
LINC01686	11.2765	12.9013	4.01187	2.94171	5.29808	2.974	2.16471
RGS8	1.87942	0	0	1.96114	0	0	0
NPL	290.37	287.514	250.742	265.734	152.585	161.587	178.589
DHX9	9160.29	9111.98	11348.6	9938.07	5880.86	5994.59	6733.33
LAMC1	3937.38	4018.75	3855.4	3871.29	4658.07	4883.31	4945.28
LAMC2	59.2017	57.1342	1295.83	38.2422	9108.45	13560.5	27098.9
NMNAT2	101.489	122.562	38.1127	73.5427	27.55	28.7487	11.9059
SMG7-AS1	10.3368	15.6658	6.0178	7.84455	12.7154	5.948	7.57648
SMG7	2678.17	2773.77	2917.63	2824.04	2759.24	2721.21	2909.37
NCF2	0.939709	1.84304	11.0326	0.980569	133.512	122.925	181.836
ARPC5	2936.59	2937.8	3149.31	3298.63	3997.93	3974.26	4421.42
RGL1	131.559	145.6	78.2314	95.1152	60.3981	66.4193	60.6119
COLGALT2	275.335	319.767	201.596	296.132	4.23846	0	4.32942
TSEN15	808.15	869.914	1061.14	988.414	793.652	831.729	763.06
C1orf21	609.871	592.537	558.652	639.331	561.596	476.831	453.507
EDEM3	1414.26	1634.78	1494.42	1560.09	1352.07	1367.05	1139.72
FAM129A	170.087	228.537	105.311	111.785	2202.94	2070.9	1750.17
LINC01633	0	0	0	0	1.05962	0	3.24706
RNF2	1264.85	1177.7	1208.57	1240.42	579.609	660.228	669.978
TRMT1L	1089.12	1113.2	1273.77	1069.8	706.763	756.387	626.683
SWT1	192.64	187.99	144.427	195.133	70.9942	48.5753	55.2001
IVNS1ABP	1801.42	2030.11	2439.21	1889.56	2733.81	2699.4	2933.18
LINC01350	1.87942	0	0	0	0	0	0
HMCN1	137.198	107.818	57.1691	53.9313	1.05962	4.95667	17.3177
PRG4	0.939709	3.68608	8.02373	11.7668	5.29808	2.974	4.32942
TPR	7552.44	7771.17	7829.16	7485.66	3814.61	3856.29	3652.95
ODR4	881.447	937.185	990.931	852.115	809.546	852.547	763.06
OCLM	3.75884	2.76456	6.0178	1.96114	6.35769	3.96533	6.49413
LOC102724919	12.2162	11.9798	12.0356	13.728	7.41731	7.93067	5.41177
PTGS2	22.553	18.4304	24.0712	8.82512	609.279	706.821	1166.78
PACERR	3.75884	0.921519	2.00593	0	4.23846	8.922	1.08235
PLA2G4A	166.329	116.111	223.662	197.094	48.7423	31.7227	55.2001
LINC01036	56.3826	66.3494	138.409	99.0375	0	0	0
LINC01701	0.939709	0	1.00297	0	0	0	0
BRINP3	33.8295	30.4101	22.0653	33.3393	0	0	0
LINC01351	5.63826	4.6076	7.02077	7.84455	0	0	0
RGS18	0	0	0	0.980569	0	0.991333	6.49413
LOC105371664	6.57796	1.84304	2.00593	5.88341	0	0	1.08235
RGS2	252.782	243.281	230.682	211.803	169.538	144.735	196.989
UCHL5	2955.39	3118.42	3189.43	3436.89	1924.26	2066.93	1962.31
TROVE2	1805.18	1710.34	1813.36	1903.28	1239.75	1202.49	1260.94
GLRX2	430.387	526.188	538.593	552.06	580.669	647.341	756.566
CDC73	1582.47	1730.61	1749.17	1704.23	1650.88	1820.09	1777.23
B3GALT2	2.81913	0.921519	0	0	0	2.974	0
LINC01031	0.939709	2.76456	1.00297	0.980569	2.11923	0.991333	0
KCNT2	128.74	92.1519	120.356	94.1346	0	4.95667	5.41177
CFH	4.69855	3.68608	18.0534	1.96114	950.475	915.992	896.19
CFHR3	24.4324	13.8228	18.0534	19.6114	0	0.991333	1.08235
CFHR1	2.81913	0	3.0089	1.96114	0	0	0
CFHR4	0.939709	0.921519	1.00297	2.94171	0	0	0
F13B	0.939709	0.921519	6.0178	0	1.05962	0.991333	0
ASPM	3739.1	3770.86	3601.65	3467.29	3814.61	3768.06	3730.88
ZBTB41	553.489	677.317	619.833	600.108	865.706	795.049	714.354
CRB1	5.63826	6.45064	2.00593	0	0	0	0
DENND1B	283.792	292.122	365.08	380.461	378.283	377.698	325.789
C1orf53	42.2869	31.3317	37.1098	49.0285	38.1461	27.7573	28.1412
LHX9	31.0104	51.6051	25.0742	37.2616	0	0	2.16471
NEK7	1127.65	1213.64	1128.34	1239.44	2387.31	2902.62	2844.43
PTPRC	0	0.921519	0	0.980569	1.05962	0	0
MIR181A1HG	0	3.68608	2.00593	2.94171	2.11923	3.96533	4.32942
MIR181B1	0	0	0	0	0	0	2.16471
NR5A2	112.765	107.818	68.2017	106.882	4.23846	5.948	8.65884
LINC00862	6.57796	2.76456	5.01483	4.90285	3.17885	3.96533	4.32942
ZNF281	1383.25	1527.88	1496.43	1493.41	869.944	924.914	1002.26
KIF14	1593.75	1654.13	1562.62	1523.8	2699.9	2726.17	2972.15
DDX59	279.094	289.357	368.089	388.305	518.152	537.303	583.389
LOC101929224	7.51767	7.37215	8.02373	0.980569	6.35769	8.922	4.32942
CAMSAP2	1973.39	2013.52	1795.31	1886.61	3071.82	3243.64	3743.87
GPR25	0	1.84304	0	0	2.11923	0.991333	0
INAVA	31.0104	26.7241	65.1928	30.3976	1796.05	1597.04	1691.72
MROH3P	0	1.84304	0	0	0	0	6.49413
KIF21B	157.871	175.089	146.433	157.872	25.4308	39.6533	23.8118
CACNA1S	2.81913	0	0	0.980569	1.05962	3.96533	0
ASCL5	3.75884	8.29367	3.0089	6.86398	1.05962	3.96533	6.49413
TMEM9	1581.53	1543.54	1744.16	1677.75	932.461	825.781	875.625
IGFN1	5.63826	11.0582	2.00593	7.84455	179.075	148.7	225.13
PKP1	0	0	63.1869	0	3716.07	3244.63	3052.24
TNNT2	0	0	0	0	4.23846	2.974	0
LAD1	0	0	36.1068	0	2301.48	2437.69	2524.05
LOC101929343	0	0	2.00593	0	40.2654	49.5667	60.6119
PHLDA3	181.364	277.377	193.573	161.794	1524.79	1464.2	1586.73
CSRP1	4.69855	2.76456	24.0712	4.90285	3034.74	3137.57	3126.92
RPS10P7	1.87942	0	0	0.980569	14.8346	17.844	15.153
NAV1	539.393	408.233	318.943	331.432	210.863	239.903	191.577
IPO9-AS1	37.5884	35.9393	54.1602	49.0285	37.0865	39.6533	31.3883
IPO9	3438.4	3441.87	3344.89	3567.31	3123.75	3009.69	3197.28
MIR6739	1.87942	0.921519	0	0.980569	6.35769	1.98267	2.16471
SHISA4	62.0208	54.3696	54.1602	28.4365	96.425	99.1333	92.0002
LMOD1	90.2121	106.896	67.1988	96.0958	2.11923	0.991333	0
TIMM17A	2283.49	2430.05	2874.5	2637.73	1446.37	1499.89	1724.19
RNPEP	2101.19	2242.06	2506.41	2394.55	1926.38	1728.89	1823.77
ELF3-AS1	54.5031	37.7823	41.1216	46.0867	105.962	97.1507	81.1766
MIR6740	0	1.84304	0	0	0	0	0
ELF3	5.63826	4.6076	13.0386	3.92228	1712.34	1028.01	444.848
GPR37L1	0	7.37215	3.0089	1.96114	8.47692	14.87	7.57648
ARL8A	581.68	548.304	530.569	591.283	742.79	682.037	803.107
PTPRVP	11.2765	4.6076	2.00593	2.94171	0	0	0
LGR6	2.81913	0	0	2.94171	5.29808	2.974	0
UBE2T	1149.26	1093.84	1102.26	1170.8	874.182	906.079	994.684
PPP1R12B	542.212	602.674	577.709	513.818	433.383	300.374	251.106
SYT2	128.74	54.3696	14.0415	54.9119	4.23846	0	0
KDM5B	2415.99	2313.94	1608.76	1605.19	1778.03	1825.04	1514.21
PCAT6	38.5281	39.6253	21.0623	37.2616	18.0135	13.8787	7.57648
MGAT4EP	0	0.921519	0	0.980569	0	0	0
LOC148709	21.6133	27.6456	19.0564	15.6891	18.0135	17.844	21.6471
RABIF	399.376	339.119	401.187	376.539	383.581	466.918	501.13
KLHL12	1148.32	1101.22	1146.39	1102.16	815.904	884.269	908.096
ADIPOR1	2223.35	2254.96	2019.97	2408.28	3190.5	3136.58	3354.22
CYB5R1	755.526	811.859	693.05	765.824	1032.07	1024.05	1023.91
TMEM183A	1991.24	2043.93	2274.73	2369.05	1175.11	1234.21	1208.99
PPFIA4	150.353	167.717	137.406	142.183	19.0731	8.922	11.9059
ADORA1	45.106	23.038	18.0534	18.6308	48.7423	53.532	47.6236
CHI3L1	0	0	0	1.96114	0	0	0
LINC01136	2.81913	0.921519	0	1.96114	0	2.974	2.16471
BTG2	489.588	591.615	462.368	440.276	422.786	363.819	330.118
FMOD	1.87942	2.76456	4.01187	0	0	0	0
PRELP	0.939709	0.921519	2.00593	0	1.05962	0.991333	10.8235
ATP2B4	1932.98	1760.1	1632.83	1721.88	1742.01	1504.84	1213.32
SNORA77	1.87942	3.68608	7.02077	1.96114	0	0.991333	0
LAX1	0	4.6076	0	0	5.29808	0	2.16471
ZC3H11A	2.81913	3.68608	1.00297	0	0	0.991333	2.16471
SNRPE	2740.19	2714.8	3436.16	3489.85	1326.64	1493.94	1496.9
LINC00303	1.87942	0.921519	0	0	0	0	0
SOX13	420.05	366.765	342.012	362.811	704.644	625.531	629.931
ETNK2	384.341	334.512	306.908	343.199	290.335	287.487	307.389
ERLNC1	2.81913	2.76456	8.02373	5.88341	0	1.98267	9.74119
REN	0	0	0	0.980569	6.35769	9.91333	5.41177
KISS1	0	2.76456	0	0	0	0	0
GOLT1A	1.87942	0	0	0	68.875	84.2633	61.6942
PLEKHA6	138.137	77.4076	63.1869	46.0867	1113.66	1143.01	1081.27
LINC00628	0.939709	0	0	0	9.53654	9.91333	7.57648
PPP1R15B	2378.4	2514.83	2258.68	2462.21	1922.14	2003.48	1919.02
PIK3C2B	422.869	455.231	472.397	427.528	431.263	338.045	221.883
MDM4	791.235	684.689	884.616	722.679	392.058	403.473	474.071
LRRN2	74.237	36.8608	23.0682	46.0867	6.35769	1.98267	8.65884
NFASC	49.8046	57.1342	20.0593	23.5337	87.9481	69.3933	79.0119
TMEM81	60.1414	43.3114	52.1543	37.2616	27.55	29.74	25.9765
RBBP5	1077.85	1046.85	1081.2	1130.6	945.177	927.888	858.307
DSTYK	1017.71	1094.76	1006.98	1095.3	1004.52	1019.09	924.331
TMCC2	277.214	262.633	197.584	207.881	253.248	276.582	219.718
NUAK2	48.8649	51.6051	50.1483	49.0285	988.621	1099.39	1003.34
KLHDC8A	15.9751	11.0582	2.00593	3.92228	0	0	3.24706
LEMD1-AS1	2.81913	0	0	0	0	0	0
LOC284577	0.939709	0.921519	0	0.980569	1.05962	0	0
CDK18	652.158	502.228	373.104	460.867	120.796	76.3327	67.106
MFSD4A	37.5884	31.3317	16.0475	23.5337	12.7154	14.87	20.5647
ELK4	750.828	758.41	735.174	665.806	1773.8	1696.17	1631.11
SLC45A3	177.605	197.205	201.596	194.153	418.548	519.459	608.283
NUCKS1	20440.6	22291.6	24941.8	25187.9	10641.7	11370.6	11743.6
RAB29	1030.86	879.129	886.622	913.89	1213.26	1286.75	1325.88
SLC41A1	1446.21	1592.39	1326.92	1251.21	1413.53	1644.62	1743.67
PM20D1	19.7339	15.6658	12.0356	13.728	0	0	0
SLC26A9	0	2.76456	1.00297	0	2.11923	4.95667	1.08235
RAB7B	3.75884	0	3.0089	0	599.742	451.057	393.977
CTSE	0	0	0	0	27.55	26.766	23.8118
RHEX	0	0	0	0	6.35769	11.896	7.57648
AVPR1B	1.87942	0	1.00297	0.980569	3.17885	3.96533	0
FAM72A	216.133	234.987	237.703	252.006	181.194	205.206	205.647
SRGAP2	1592.81	1470.74	1368.05	1243.36	1235.51	1125.16	1092.1
IKBKE	11.2765	11.9798	5.01483	5.88341	436.561	328.131	219.718
RASSF5	317.622	299.494	271.804	342.219	637.888	514.502	444.848
EIF2D	1135.17	1195.21	1254.71	1282.58	745.969	755.396	739.248
DYRK3	747.069	858.856	795.352	766.805	347.554	370.759	514.119
MAPKAPK2	1675.5	1665.19	1592.71	1670.89	2343.87	2534.84	2691.82
IL19	1.87942	1.84304	1.00297	0	2.11923	0	0
IL20	1.87942	0.921519	0	0.980569	1.05962	0.991333	0
IL24	1.87942	0	0	0.980569	83.7096	185.379	638.589
FCMR	3.75884	11.0582	3.0089	3.92228	52.9808	54.5233	76.8472
PIGR	0.939709	0	0	2.94171	1.05962	0	0
FCAMR	0	1.84304	0	0	0	0	0
C1orf116	14.0956	19.3519	30.089	20.592	1970.88	2037.19	1907.11
PFKFB2	604.233	582.4	581.721	631.486	966.369	982.411	1066.12
YOD1	1350.36	1366.61	1406.16	1490.47	1159.22	1196.54	1180.85
CD55	971.659	1056.98	1081.2	1241.4	856.169	821.815	901.602
CR2	69.5385	60.8203	76.2255	52.9507	26.4904	17.844	22.7295
CR1L	8.45738	0.921519	4.01187	10.7863	0	0	1.08235
CD46	2381.22	2308.41	2449.24	2507.32	4075.28	4080.33	3776.34
CD34	7.51767	10.1367	4.01187	2.94171	1.05962	5.948	6.49413
PLXNA2	383.401	290.279	186.552	264.754	2634.2	2468.42	2454.78
MIR205HG	0	0	47.1394	0	2047.18	1900.39	1815.11
MIR205	0	0	0	0	20.1327	27.7573	17.3177
CAMK1G	6.57796	2.76456	0	1.96114	0	0	0
LAMB3	26.3119	23.9595	457.353	13.728	6631.07	9338.36	18247.4
MIR4260	0	0	0	0	0	0	2.16471
HSD11B1-AS1	0.939709	1.84304	1.00297	1.96114	8.47692	3.96533	8.65884
G0S2	38.5281	45.1544	80.2373	48.0479	405.833	664.193	1857.32
TRAF3IP3	3.75884	0.921519	4.01187	2.94171	29.6692	26.766	16.2353
C1orf74	254.661	178.775	211.626	277.501	2102.28	1868.66	1315.06
IRF6	25.3721	16.5873	93.2759	10.7863	10855.8	9624.86	6763.64
UTP25	1182.15	1233.91	1390.11	1332.59	1033.12	968.533	987.108
SYT14	72.3576	107.818	40.1187	46.0867	824.381	793.067	624.519
SERTAD4-AS1	59.2017	49.762	36.1068	48.0479	89.0077	71.376	112.565
SERTAD4	578.861	495.777	424.255	485.382	756.565	823.798	900.519
HHAT	136.258	91.2304	80.2373	92.1735	128.213	153.657	124.471
KCNH1	4.69855	1.84304	0	0	0	0	0
RCOR3	641.821	666.258	601.78	599.128	617.756	571.008	576.895
TRAF5	214.254	209.185	252.748	193.172	254.308	244.859	198.071
LINC00467	253.721	236.83	268.795	256.909	191.79	225.033	235.953
RD3	2.81913	3.68608	0	0	0	0	0
SLC30A1	793.115	799.879	581.721	488.323	1396.57	1552.43	1441.7
NEK2	1192.49	1146.37	1057.13	1284.55	1128.49	1165.81	1160.28
LOC91548	3.75884	10.1367	2.00593	9.80569	1.05962	1.98267	0
LPGAT1	1912.31	1996.93	2244.64	2127.83	2753.94	2850.08	2965.65
INTS7	1567.43	1476.27	1612.77	1432.61	1089.28	1151.93	1158.12
DTL	1861.56	1834.74	1574.66	1691.48	1083.99	1162.83	1128.9
RPL21P28	31.9501	44.2329	33.0979	33.3393	24.3711	12.8873	28.1412
MIR3122	0.939709	0	0	0.980569	0	0	0
LINC02608	0	4.6076	1.00297	0	1.05962	2.974	0
PPP2R5A	1005.49	982.34	979.898	1051.17	982.263	940.775	879.954
SNORA16B	0.939709	0.921519	5.01483	0	1.05962	0	0
TMEM206	676.591	690.218	700.071	670.709	350.733	409.421	426.448
NENF	1179.34	1154.66	1145.39	1151.19	516.033	540.277	532.519
ATF3	1269.55	1254.19	411.216	954.094	356.031	366.793	327.954
FAM71A	0	1.84304	0	0	0	0	0
BATF3	155.992	164.03	125.371	185.328	36.0269	26.766	30.3059
NSL1	1305.26	1268.93	1415.19	1404.17	669.677	646.349	589.883
TATDN3	531.875	558.441	515.525	632.467	235.235	210.163	192.659
SPATA45	2.81913	1.84304	4.01187	0.980569	1.05962	0	0
FLVCR1-DT	51.684	39.6253	37.1098	30.3976	49.8019	57.4973	50.8707
FLVCR1	917.156	1085.55	1206.57	1137.46	549.94	526.398	548.754
VASH2	334.536	375.98	279.828	327.51	31.7885	26.766	20.5647
ANGEL2	1215.04	1197.05	1380.08	1212.96	809.546	740.526	747.907
RPS6KC1	458.578	494.856	509.507	440.276	527.688	567.043	537.93
PROX1	374.944	342.805	160.475	152.969	2.11923	2.974	1.08235
SMYD2	536.574	584.243	694.053	587.361	1331.94	1432.48	1409.23
PTPN14	1122.95	1060.67	1033.06	1006.06	2961.62	3071.15	2982.97
CENPF	6891.83	6738.15	6041.87	5502.95	4668.66	4591.86	4396.53
KCNK2	10.3368	10.1367	10.0297	0.980569	0	0.991333	1.08235
KCTD3	2098.37	2058.67	2385.05	2355.33	1633.93	1650.57	1531.53
USH2A	7.51767	4.6076	2.00593	0	0	0	0
ESRRG	91.1518	70.0355	69.2047	92.1735	0	0	0
GPATCH2	455.759	490.248	473.4	472.634	476.827	484.762	461.083
SPATA17	52.6237	72.8	59.175	61.7759	4.23846	3.96533	5.41177
SPATA17-AS1	0	0	0	1.96114	0	0	0
RRP15	1477.22	1501.15	1851.48	1723.84	767.161	860.477	866.966
TGFB2-AS1	3.75884	5.52912	0	0.980569	15.8942	19.8267	10.8235
TGFB2	43.2266	43.3114	30.089	33.3393	1175.11	934.827	513.036
C1orf143	2.81913	0.921519	0	0	7.41731	3.96533	2.16471
LYPLAL1	442.603	449.701	548.623	490.285	431.263	462.953	385.318
ZC3H11B	6.57796	5.52912	10.0297	2.94171	2.11923	3.96533	5.41177
SLC30A10	56.3826	53.4481	40.1187	57.8536	0	0	0
EPRS	8593.64	8287.22	9011.65	9590.95	4723.76	5261.01	4986.41
BPNT1	1634.15	1497.47	1349.99	1509.1	1008.75	947.715	1098.59
IARS2	6085.56	5937.35	6984.66	6722.78	3416.2	3583.67	3499.25
RAB3GAP2	1901.03	1780.38	1757.2	1615	1941.21	1922.2	1922.26
MIR664A	0	0	1.00297	0	0	0	1.08235
MARK1	518.719	559.362	540.599	609.914	412.19	441.143	448.095
C1orf115	410.653	417.448	425.258	453.023	288.215	244.859	239.2
2021-03-02	309.164	321.61	315.934	314.763	236.294	183.397	196.989
2021-03-01	581.68	642.299	901.667	665.806	171.658	192.319	180.753
LINC01352	1.87942	1.84304	1.00297	0	0	0	0
HLX-AS1	5.63826	6.45064	6.0178	11.7668	0	0	0
HLX	149.414	124.405	186.552	126.493	0	0	0
DUSP10	90.2121	82.0152	56.1661	79.4261	2449.83	2409.93	1601.89
HHIPL2	21.6133	18.4304	12.0356	10.7863	7.41731	1.98267	5.41177
TAF1A	256.541	363.079	400.184	286.326	275.5	329.123	344.189
TAF1A-AS1	38.5281	38.7038	27.0801	50.9896	44.5038	35.688	19.4824
MIA3	2470.5	2654.9	2485.35	2278.84	1104.12	1055.77	1058.54
AIDA	1267.67	1299.34	1261.73	1417.9	1472.87	1678.33	1985.04
BROX	1097.58	1173.09	1153.41	1045.29	1522.67	1460.23	1555.34
FAM177B	1.87942	1.84304	0	0	0	0	0
DISP1	56.3826	63.5848	41.1216	62.7564	40.2654	46.5927	64.9413
TLR5	22.553	17.5089	12.0356	8.82512	16.9538	7.93067	3.24706
SUSD4	109.946	78.3291	42.1246	56.873	14.8346	14.87	22.7295
CAPN8	6.57796	2.76456	2.00593	0.980569	31.7885	28.7487	16.2353
CAPN2	3498.54	3494.4	3956.7	3832.06	11319.9	11649.2	12052
TP53BP2	1975.27	2101.99	1760.21	1965.06	1044.78	1114.26	1250.12
FBXO28	2262.82	2103.83	1939.74	2044.49	1310.74	1351.19	1437.37
DEGS1	3360.4	3328.53	2998.87	3226.07	1274.72	1443.38	1932
LOC101927164	14.0956	4.6076	10.0297	7.84455	1.05962	2.974	2.16471
NVL	1647.31	1632.93	1711.06	1644.41	664.379	696.907	738.166
CNIH4	1720.61	1646.76	1712.06	1891.52	1012.99	1154.9	1073.7
WDR26	5253.91	5147.61	4030.92	4138	3088.78	3171.28	3207.02
CNIH3	87.393	93.0735	69.2047	80.4067	28.6096	33.7053	30.3059
DNAH14	870.171	812.78	747.21	763.863	308.348	304.339	278.165
LBR	6869.27	7301.2	7832.17	8212.27	2086.38	2166.06	2327.06
ENAH	8803.2	8515.76	8658.61	7787.68	4172.76	3889.99	3408.34
SRP9	11469.2	11116.3	11922.3	12809.2	4826.55	4881.33	5273.23
EPHX1	1162.42	1159.27	937.774	885.454	900.673	810.911	846.401
TMEM63A	736.732	690.218	613.816	533.43	1184.65	1199.51	1069.37
LEFTY1	1.87942	0.921519	0	0	0	0	0
PYCR2	982.936	1115.04	1199.55	1065.88	440.8	450.065	397.224
LEFTY2	0	0.921519	3.0089	1.96114	0	0	0
SDE2	3025.86	2876.98	2319.86	2658.32	894.315	995.299	938.402
H3F3A	7163.4	7491.03	7897.36	8068.12	3458.58	3276.36	3023.02
LINC01703	69.5385	46.076	58.1721	59.8147	11.6558	23.792	9.74119
ACBD3	2692.27	2752.58	2466.29	2386.71	1470.75	1512.77	1387.58
ACBD3-AS1	51.684	50.6836	50.1483	68.6398	18.0135	26.766	24.8942
MIXL1	17.8545	23.9595	22.0653	20.592	0	0	0
LIN9	1159.6	1153.74	1048.1	1139.42	491.661	480.797	465.413
PARP1	30319.7	29729.1	31283.5	29966.2	4862.57	5364.11	5331.68
STUM	406.894	308.709	103.306	165.716	0	0.991333	0
ITPKB	153.173	129.934	131.389	97.0763	587.027	630.488	558.495
PSEN2	786.537	784.213	928.747	840.348	387.819	433.213	508.707
COQ8A	2774.02	2753.5	2831.37	2831.88	486.363	411.403	444.848
CDC42BPA	2405.66	2238.37	2048.06	2303.36	1207.96	1328.39	1282.59
ZNF678	888.025	976.81	863.554	959.977	405.833	541.268	468.66
SNAP47	1851.23	1661.5	1604.75	1741.49	662.259	740.526	755.484
JMJD4	1307.14	1165.72	1349.99	1463.01	590.206	629.497	641.836
WNT9A	87.393	71.8785	46.1365	26.4754	247.95	257.747	360.424
WNT3A	67.6591	51.6051	29.086	43.145	6.35769	0.991333	4.32942
ARF1	12879.7	13067.1	13025.5	13961.3	6472.13	6636.98	7485.57
C1orf35	1914.19	2134.24	2199.51	2082.73	580.669	594.8	622.354
MRPL55	1237.6	1188.76	1373.06	1353.19	425.965	420.325	493.554
GUK1	2654.68	2742.44	2504.41	2759.32	2080.02	2183.91	2389.84
GJC2	40.4075	42.3899	47.1394	19.6114	14.8346	13.8787	8.65884
IBA57-DT	10.3368	2.76456	7.02077	8.82512	3.17885	0	0
IBA57	1115.43	1091.08	1173.47	1105.1	289.275	312.27	329.036
OBSCN-AS1	57.3223	56.2127	19.0564	33.3393	22.2519	33.7053	40.0471
OBSCN	844.799	686.532	681.014	605.992	475.767	457.005	413.46
TRIM11	1930.16	1899.25	1913.66	1854.26	935.64	961.593	926.496
TRIM17	19.7339	14.7443	31.092	17.6502	33.9077	20.818	22.7295
HIST3H3	3.75884	0	1.00297	0	0	0	0
HIST3H2A	461.397	501.307	223.662	315.743	77.3519	78.3153	101.741
HIST3H2BB	87.393	105.053	34.1009	34.3199	18.0135	6.93933	10.8235
MIR4666A	0	1.84304	0	0.980569	0	0	0
RNF187	5471.93	5638.78	5926.53	5960.88	1453.79	1394.81	1357.27
RHOU	829.763	735.372	521.543	621.681	37.0865	31.7227	48.706
RAB4A	1789.21	1711.26	1735.13	1889.56	838.156	857.503	940.566
CCSAP	1449.03	1580.41	1339.96	1427.71	695.108	698.89	613.695
ACTA1	23.4927	19.3519	16.0475	21.5725	1.05962	0.991333	3.24706
NUP133	5083.83	4782.69	5458.14	5083.27	1589.42	1600.01	1547.77
LOC101927478	6.57796	5.52912	1.00297	1.96114	0	0.991333	1.08235
ABCB10	1449.03	1577.64	2082.16	1735.61	795.771	922.931	929.743
TAF5L	1941.44	1806.18	1935.73	1858.18	1095.64	1280.8	1358.36
URB2	2071.12	2254.04	2442.22	2271.98	905.971	926.897	1016.33
GALNT2	3529.55	3451.09	3522.42	3268.24	5134.89	5209.46	4949.61
PGBD5	303.526	290.279	365.08	317.704	570.073	440.152	434.024
COG2	1395.47	1362.93	1476.37	1545.38	606.1	594.8	572.566
AGT	0	0	0	0	4.23846	1.98267	0
CAPN9	4.69855	1.84304	5.01483	3.92228	1.05962	0	0
C1orf198	1331.57	1353.71	1464.33	1465.95	643.186	609.67	572.566
LOC101927604	44.1663	43.3114	53.1572	34.3199	3.17885	15.8613	11.9059
TTC13	995.152	1016.44	1067.16	902.124	256.427	295.417	206.73
ARV1	896.483	937.185	1088.22	1195.31	356.031	332.097	426.448
FAM89A	449.181	461.681	502.486	562.847	12.7154	24.7833	35.7177
TRIM67	8.45738	5.52912	1.00297	0.980569	0	0	0
C1orf131	945.347	864.385	1113.29	1088.43	341.196	295.417	371.248
GNPAT	1988.42	2054.99	2403.11	2172.94	839.215	879.313	914.59
EXOC8	1394.53	1349.1	1192.53	1215.91	595.504	601.739	649.413
SPRTN	1669.86	1632.01	1480.38	1656.18	466.231	534.329	498.966
EGLN1	448.241	442.329	399.181	424.586	240.533	200.249	188.33
TSNAX	2073.94	1932.43	1967.82	2128.82	952.594	1009.18	1003.34
DISC1	189.821	139.149	133.395	96.0958	12.7154	6.93933	12.9883
DISC1-IT1	0.939709	0	3.0089	0.980569	0	0	0
SIPA1L2	862.653	730.765	505.495	558.924	104.902	107.064	76.8472
MAP10	0	0	0	0	2.11923	10.9047	8.65884
NTPCR	1108.86	1073.57	1399.14	1319.85	480.006	468.901	448.095
PCNX2	545.971	605.438	627.857	455.965	450.336	549.199	430.777
MAP3K21	1715.91	1847.65	1941.74	1695.4	404.773	438.169	370.165
KCNK1	194.52	186.147	184.546	154.93	364.508	311.279	320.377
SLC35F3	17.8545	9.21519	8.02373	5.88341	25.4308	57.4973	51.953
COA6-AS1	72.3576	58.9772	77.2284	49.0285	26.4904	26.766	19.4824
COA6	1055.29	1014.59	1214.59	1129.62	465.171	497.649	560.66
TARBP1	2404.72	2353.56	2468.3	2491.63	1203.72	1094.43	989.272
IRF2BP2	2806.91	2841.97	2868.48	2539.67	1894.59	1781.43	1694.97
LINC00184	0	0.921519	0	0	1.05962	0	3.24706
LOC101927787	0	1.84304	0	1.96114	2.11923	0	1.08235
LINC01132	8.45738	4.6076	1.00297	0	0	0.991333	1.08235
LOC101927851	0	3.68608	0	0	0	0.991333	0
TOMM20	10653.5	11280.3	11740.7	13002.3	3056.99	3722.46	3767.68
SNORA14B	13.1559	28.5671	25.0742	27.4559	8.47692	12.8873	6.49413
RBM34	16.9148	14.7443	14.0415	11.7668	10.5962	9.91333	12.9883
ARID4B	1937.68	2090.93	1700.03	1544.4	1118.95	1055.77	1001.18
GGPS1	480.191	516.972	495.465	508.915	92.1865	105.081	109.318
TBCE	84.5738	86.6228	81.2403	92.1735	26.4904	27.7573	20.5647
B3GALNT2	1560.86	1663.34	1563.62	1478.7	1250.35	1270.89	1335.63
GNG4	690.686	771.312	365.08	678.554	87.9481	73.3587	90.9178
LYST	557.248	540.01	418.237	453.023	464.111	417.351	366.918
NID1	3850.93	4021.51	3418.11	3704.59	1149.68	1181.67	970.872
GPR137B	235.867	281.063	192.57	201.017	239.473	203.223	246.777
ERO1B	728.275	664.415	552.635	601.089	289.275	255.764	300.895
EDARADD	128.74	103.21	75.2225	112.765	209.804	188.353	117.977
LGALS8	46.9855	27.6456	68.2017	42.1645	1999.49	1884.52	1611.63
LGALS8-AS1	0	0.921519	0	0	13.775	24.7833	7.57648
[truncated: 18,088 more rows]
