# Supplementary material for: Single-cell transcriptome analysis defines heterogeneity of the murine pancreatic ductal tree
Source: eLife journal article supplement (doi:10.7554/elife.67776), 2021-05-18
Supplement: supp [file elife_poa_e67776_Figure_1_source_data_1.xlsx]

## Sheet: All DBA+ cell (16 clusters)
Cluster	# of cells	Transcripts	Genes
0	1576	5637	2299
1	1173	4065	1350
2	1127	5008	1810
3	836	4355	1734
4	566	4194	1371
5	494	3626	1732
6	219	8539	2345
7	197	12864	3078
8	180	5323	2354
9	147	6123	2285
10	72	8312	2222
11	68	12645	3220
12	56	7955	2618
13	43	9160	2190
14	35	17125	3523
15	24	6332	2155
