# Supplementary material for: Single-cell transcriptome analysis defines heterogeneity of the murine pancreatic ductal tree
Source: eLife journal article supplement (doi:10.7554/elife.67776), 2021-05-18
Supplement: supp [file elife_poa_e67776_Supplementary_file_4.xlsx]

## Sheet: EMT + progenitor
Primer name	Sequence (5'--> 3')
hCDH1_fw	CGAGAGCTACACGTTCACGG
hCDH1_rv	GGGTGTCGAGGGAAAAATAGG
hCDH2_fw	TGTCACTGCTCAAGACCTGGATGT
hCDH2_rv	TGCGCAGTGCTTTCTCTGTCTAGT
hVIM_fw	GACGCCATCAACACCGAGTT
hVIM_rv	CTTTGTCGTTGGTTAGCTGGT
hEPCAM_fw	AATCGTCAATGCCAGTGTACTT
hEPCAM_rv	TCTCATCGCAGTCAGGATCATAA
hCLDN4_fw	GGGGCAAGTGTACCAACTG
hCLDN4_rv	GACACCGGCACTATCACCA
hCLDN7_fw	AGCTGCAAAATGTACGACTCG
hCLDN7_rv	GGAGACCACCATTAGGGCTC
hKRT19_fw	ACCAAGTTTGAGACGGAACAG
hKRT19_rv	CCCTCAGCGTACTGATTTCCT
hKRT7_fw	TGAAATTAACCACCGCACAG
hKRT7_rv	TGCATTTGGCCATCTCCTCA
hZEB1_fw	TTACACCTTTGCATACAGAAC
hZEB1_rv	TTTACGATTACACCCAGACTG
hZEB2_fw	GCGATGGTCATGCAGTCAG
hZEB2_rv	CAGGTGGCAGGTCATTTTCTT
hSNAI1_fw	TCGGAAGCCTAACTACAGCGA
hSNAI1_rv	AGATGAGCATTGGCAGCGAG
hTWIST1_fw	GTCCGCAGTCTTACGAGGAG
hTWIST1_rv	GCTTGAGGGTCTGAATCTTGC
hTCF4_fw	GGCTATGCAGGAATGTTGGG
hTCF4_rv	GTTCATGTGGATGCAGGCTAC
hGRHL2_fw	GAAAACCGAGTGCAAGTCCTA
hGRHL2_rv	GGGCCATGAAAACTGGTGTG
hELF3_fw	GGCCGATGACTTGGTACTGAC
hELF3_rv	GCTTGCGTCGTACTTGTTCTTC
hPDGFRA_fw	TTGAAGGCAGGCACATTTACA
hPDGFRA_rv	GCGACAAGGTATAATGGCAGAAT
hNKX6-1_fw	AGGGCTCGTTTGGCCTATTC
hNKX6-1_rv	AGAGGCTTATTGTAGTCGTCGT
hPDX1_fw	GATGAAGTCTACCAAAGCTCACGC
hPDX1_Rv	GAATAGGAACTCCTTCTCCAGCTCT
hPTF1A_fw	TTCACCGACCAGTCTTCACG
hPTF1A_rv	GTGGCTAAGGAACTCCACCT
hGATA4_fw	CGACACCCCAATCTCGATATG
hGATA4_Rv	GTTGCACAGATAGTGACCCGT
hGATA6_fw	GCAGCAAAAATACTTCCCCCACA
hGATA6_rv	GAGCCCATCTTGACCCGAATACT
hPROX1_fw	AAAGTCAAATGTACTCCGCAAGC
hPROX1_rv	CTGGGAAATTATGGTTGCTCCT
hMYT1_fw	CGCCTCTGTTTCGGATGAATC
hMYT1_rv	TGAATCTCGTCCTGTCCTGAC
hRXRG_fw	CCGGATCTCTGGTTAAACACATC
hRXRG_rv	GTCCTTCCTTATCGTCCTCTTGA
